# Supplementary material for: Ductal keratin 15+ luminal progenitors in normal breast exhibit a basal-like breast cancer transcriptomic signature
Source: PubMed Central journal article supplement (PMC9276673; doi:10.1038/s41523-022-00444-8), 2022-07-12
Supplement: 41523_2022_444_MOESM3_ESM.pdf [file 41523_2022_444_MOESM3_ESM.pdf]

## Supplementary Data 1.

DEGs among clusters. Data include all cluster specific gene markers analyzed with Seurat.

DEGs are identified using a Wilcoxon Rank Sum test.

The gene list was further filtered using a threshold of 0.05 for the adjusted p-value, and 0.1 for the average log<sub>2</sub>(FC).

Abbreviations: p\_val = p-value

avg\_log2FC = average log<sub>2</sub>(fold change)

pct.1 = percentage of cells in which the gene is detected in a given cluster

pct.2 = percentage of cell in which the gene is detected in the rest of cells

p\_val\_adj = adjusted p-value

|          | p_val | avg_log2FC  | pct.1 | pct.2 | p_val_adj | cluster | gene     | pct.1/pct.2 |
|----------|-------|-------------|-------|-------|-----------|---------|----------|-------------|
| UBC      | 0     | 2.193931057 | 0.988 | 0.887 | 0         | 1.1     | UBC      | 1.113866967 |
| CYR61    | 0     | 2.130701775 | 0.546 | 0.235 | 0         | 1.1     | CYR61    | 2.323404255 |
| KRT15    | 0     | 2.018226939 | 0.601 | 0.113 | 0         | 1.1     | KRT15    | 5.318584071 |
| OSER1    | 0     | 1.94396573  | 0.857 | 0.446 | 0         | 1.1     | OSER1    | 1.921524664 |
| PDE4B    | 0     | 1.895859847 | 0.931 | 0.463 | 0         | 1.1     | PDE4B    | 2.010799136 |
| RNF145   | 0     | 1.84864534  | 0.744 | 0.284 | 0         | 1.1     | RNF145   | 2.61971831  |
| CRYAB    | 0     | 1.770366085 | 0.647 | 0.206 | 0         | 1.1     | CRYAB    | 3.140776699 |
| OSBPL9   | 0     | 1.596732585 | 0.712 | 0.331 | 0         | 1.1     | OSBPL9   | 2.151057402 |
| PIGR     | 0     | 1.552539684 | 0.559 | 0.208 | 0         | 1.1     | PIGR     | 2.6875      |
| LRRFIP2  | 0     | 1.535040934 | 0.94  | 0.739 | 0         | 1.1     | LRRFIP2  | 1.271989175 |
| ARHGEF28 | 0     | 1.518382005 | 0.551 | 0.238 | 0         | 1.1     | ARHGEF28 | 2.31512605  |
| COBL     | 0     | 1.465949764 | 0.672 | 0.297 | 0         | 1.1     | COBL     | 2.262626263 |
| HNRNPA1  | 0     | 1.454192372 | 0.956 | 0.733 | 0         | 1.1     | HNRNPA1  | 1.304229195 |
| RASA2    | 0     | 1.394212928 | 0.792 | 0.507 | 0         | 1.1     | RASA2    | 1.562130178 |
| IGF2BP2  | 0     | 1.385138887 | 0.563 | 0.234 | 0         | 1.1     | IGF2BP2  | 2.405982906 |
| CALD1    | 0     | 1.378453878 | 0.633 | 0.254 | 0         | 1.1     | CALD1    | 2.492125984 |
| LHFPL2   | 0     | 1.355453858 | 0.597 | 0.254 | 0         | 1.1     | LHFPL2   | 2.350393701 |
| DAPK2    | 0     | 1.346307997 | 0.527 | 0.195 | 0         | 1.1     | DAPK2    | 2.702564103 |
| NPM1     | 0     | 1.333745619 | 0.938 | 0.685 | 0         | 1.1     | NPM1     | 1.369343066 |
| PSME4    | 0     | 1.315027537 | 0.846 | 0.614 | 0         | 1.1     | PSME4    | 1.377850163 |
| ANXA1    | 0     | 1.281223808 | 0.889 | 0.573 | 0         | 1.1     | ANXA1    | 1.551483421 |
| GBP1     | 0     | 1.264341253 | 0.336 | 0.07  | 0         | 1.1     | GBP1     | 4.8         |
| EEF1B2   | 0     | 1.228496461 | 0.897 | 0.707 | 0         | 1.1     | EEF1B2   | 1.26874116  |
| EIF3E    | 0     | 1.217793521 | 0.842 | 0.54  | 0         | 1.1     | EIF3E    | 1.559259259 |
| RPSA     | 0     | 1.141024565 | 0.932 | 0.794 | 0         | 1.1     | RPSA     | 1.173803526 |
| RPS23    | 0     | 1.11042398  | 0.994 | 0.965 | 0         | 1.1     | RPS23    | 1.030051813 |
| RPL11    | 0     | 1.076003953 | 0.991 | 0.955 | 0         | 1.1     | RPL11    | 1.037696335 |
| RPL35A   | 0     | 1.057113847 | 0.992 | 0.95  | 0         | 1.1     | RPL35A   | 1.044210526 |
| RPL14    | 0     | 1.056370197 | 0.99  | 0.957 | 0         | 1.1     | RPL14    | 1.034482759 |
| RPS27A   | 0     | 1.052317655 | 0.994 | 0.968 | 0         | 1.1     | RPS27A   | 1.026859504 |
| RPL32    | 0     | 1.043693378 | 0.995 | 0.973 | 0         | 1.1     | RPL32    | 1.022610483 |
| HSP90AB1 | 0     | 1.034165252 | 0.96  | 0.823 | 0         | 1.1     | HSP90AB1 | 1.166464156 |
| RPL30    | 0     | 1.028284072 | 0.99  | 0.949 | 0         | 1.1     | RPL30    | 1.043203372 |
| TOMM7    | 0     | 1.01872447  | 0.929 | 0.802 | 0         | 1.1     | TOMM7    | 1.158354115 |
| BTF3     | 0     | 1.015738963 | 0.957 | 0.88  | 0         | 1.1     | BTF3     | 1.0875      |
| RPL4     | 0     | 1.014541284 | 0.967 | 0.881 | 0         | 1.1     | RPL4     | 1.097616345 |
| RPL21    | 0     | 1.013291055 | 0.976 | 0.856 | 0         | 1.1     | RPL21    | 1.140186916 |
| NACA     | 0     | 1.010628493 | 0.979 | 0.9   | 0         | 1.1     | NACA     | 1.087777778 |
| RPL22    | 0     | 0.994398065 | 0.843 | 0.627 | 0         | 1.1     | RPL22    | 1.344497608 |
| RPL5     | 0     | 0.979853125 | 0.986 | 0.935 | 0         | 1.1     | RPL5     | 1.054545455 |
| RPS3A    | 0     | 0.972970575 | 0.972 | 0.889 | 0         | 1.1     | RPS3A    | 1.09336333  |
| RPS6     | 0     | 0.965404863 | 0.994 | 0.976 | 0         | 1.1     | RPS6     | 1.018442623 |
| PLEKHA6  | 0     | 0.962801916 | 0.942 | 0.818 | 0         | 1.1     | PLEKHA6  | 1.151589242 |
| ROPN1B   | 0     | 0.9523142   | 0.281 | 0.033 | 0         | 1.1     | ROPN1B   | 8.515151515 |
| RPS15A   | 0     | 0.941784928 | 0.984 | 0.936 | 0         | 1.1     | RPS15A   | 1.051282051 |
| SLC47A1  | 0     | 0.94152737  | 0.972 | 0.886 | 0         | 1.1     | SLC47A1  | 1.097065463 |
| RPS4X    | 0     | 0.928729225 | 0.994 | 0.977 | 0         | 1.1     | RPS4X    | 1.017400205 |
| RPL31    | 0     | 0.927400994 | 0.983 | 0.917 | 0         | 1.1     | RPL31    | 1.071973828 |
| EEF1A1   | 0     | 0.925503036 | 0.993 | 0.972 | 0         | 1.1     | EEF1A1   | 1.021604938 |
| APOO     | 0     | 0.899479458 | 0.991 | 0.963 | 0         | 1.1     | APOO     | 1.029075805 |
| RPL34    | 0     | 0.859159823 | 0.996 | 0.976 | 0         | 1.1     | RPL34    | 1.020491803 |

|                  |           |             |       |       |           |     |           |             |
|------------------|-----------|-------------|-------|-------|-----------|-----|-----------|-------------|
| RPS7             | 0         | 0.858672528 | 0.976 | 0.908 | 0         | 1.1 | RPS7      | 1.074889868 |
| RPL7A            | 0         | 0.853200518 | 0.986 | 0.954 | 0         | 1.1 | RPL7A     | 1.033542977 |
| RPS24            | 0         | 0.818347149 | 0.993 | 0.963 | 0         | 1.1 | RPS24     | 1.031152648 |
| SIK3             | 0         | 0.805219562 | 0.99  | 0.97  | 0         | 1.1 | SIK3      | 1.020618557 |
| ZFAS1            | 0         | 0.785519621 | 0.979 | 0.922 | 0         | 1.1 | ZFAS1     | 1.061822126 |
| OOEP             | 0         | 0.737709125 | 0.994 | 0.962 | 0         | 1.1 | OOEP      | 1.033264033 |
| RPS17            | 0         | 0.663649388 | 0.979 | 0.936 | 0         | 1.1 | RPS17     | 1.045940171 |
| PLEKHA7          | 0         | 0.594383    | 0.995 | 0.978 | 0         | 1.1 | PLEKHA7   | 1.017382413 |
| ROPN1            | 0         | 0.577585071 | 0.16  | 0.015 | 0         | 1.1 | ROPN1     | 10.66666667 |
| RSL1D1           | 1.58E-305 | 1.128740508 | 0.705 | 0.419 | 3.81E-301 | 1.1 | RSL1D1    | 1.682577566 |
| DHFR             | 1.96E-305 | 0.944544364 | 0.914 | 0.774 | 4.72E-301 | 1.1 | DHFR      | 1.180878553 |
| BAIAP2L1         | 5.22E-302 | 1.192626562 | 0.978 | 0.919 | 1.26E-297 | 1.1 | BAIAP2L1  | 1.064200218 |
| SRRM1            | 1.94E-301 | 1.067128723 | 0.766 | 0.506 | 4.67E-297 | 1.1 | SRRM1     | 1.513833992 |
| LDHB             | 8.52E-301 | 1.080168709 | 0.788 | 0.535 | 2.05E-296 | 1.1 | LDHB      | 1.472897196 |
| MLLT4            | 1.47E-299 | 1.087435417 | 0.845 | 0.619 | 3.54E-295 | 1.1 | MLLT4     | 1.365105008 |
| RPL24            | 1.16E-297 | 0.702375389 | 0.975 | 0.909 | 2.79E-293 | 1.1 | RPL24     | 1.072607261 |
| RPL7             | 6.59E-293 | 1.152381037 | 0.971 | 0.864 | 1.59E-288 | 1.1 | RPL7      | 1.123842593 |
| FAM13A           | 9.02E-289 | 1.497882968 | 0.524 | 0.23  | 2.17E-284 | 1.1 | FAM13A    | 2.27826087  |
| RIPK2            | 2.10E-288 | 1.267538461 | 0.55  | 0.245 | 5.07E-284 | 1.1 | RIPK2     | 2.244897959 |
| MAMDC2           | 1.49E-280 | 0.928207551 | 0.944 | 0.838 | 3.59E-276 | 1.1 | MAMDC2    | 1.126491647 |
| NFKBIZ           | 5.47E-273 | 1.024011235 | 0.796 | 0.528 | 1.32E-268 | 1.1 | NFKBIZ    | 1.507575758 |
| SRSF3            | 6.98E-270 | 1.035034705 | 0.703 | 0.397 | 1.68E-265 | 1.1 | SRSF3     | 1.770780856 |
| LRP6             | 1.25E-259 | 1.095285612 | 0.428 | 0.16  | 3.01E-255 | 1.1 | LRP6      | 2.675       |
| HSPA5            | 2.40E-258 | 1.368088504 | 0.703 | 0.418 | 5.80E-254 | 1.1 | HSPA5     | 1.681818182 |
| DDX21            | 4.80E-258 | 1.031633866 | 0.742 | 0.494 | 1.16E-253 | 1.1 | DDX21     | 1.502024291 |
| EIF3L            | 5.24E-252 | 0.919037601 | 0.792 | 0.563 | 1.26E-247 | 1.1 | EIF3L     | 1.406749556 |
| PFDN5            | 1.61E-250 | 0.764621358 | 0.912 | 0.837 | 3.89E-246 | 1.1 | PFDN5     | 1.089605735 |
| MAML2            | 5.35E-249 | 0.962374336 | 0.724 | 0.376 | 1.29E-244 | 1.1 | MAML2     | 1.925531915 |
| EIF4A2           | 7.52E-249 | 0.882594732 | 0.862 | 0.675 | 1.81E-244 | 1.1 | EIF4A2    | 1.277037037 |
| UQCRH            | 1.73E-246 | 0.900881625 | 0.863 | 0.734 | 4.16E-242 | 1.1 | UQCRH     | 1.175749319 |
| MECOM            | 1.04E-245 | 0.807750013 | 0.904 | 0.791 | 2.51E-241 | 1.1 | MECOM     | 1.142857143 |
| RPL27            | 2.28E-238 | 0.607186166 | 0.97  | 0.901 | 5.49E-234 | 1.1 | RPL27     | 1.076581576 |
| PDLIM5           | 7.43E-238 | 0.913024982 | 0.876 | 0.726 | 1.79E-233 | 1.1 | PDLIM5    | 1.20661157  |
| ILF2             | 2.62E-234 | 1.012209286 | 0.664 | 0.4   | 6.32E-230 | 1.1 | ILF2      | 1.66        |
| RPL41            | 7.70E-233 | 0.92474513  | 0.964 | 0.895 | 1.86E-228 | 1.1 | RPL41     | 1.077094972 |
| SEC24D           | 4.43E-231 | 1.048674725 | 0.423 | 0.165 | 1.07E-226 | 1.1 | SEC24D    | 2.563636364 |
| USP53            | 2.12E-228 | 1.223261342 | 0.798 | 0.601 | 5.12E-224 | 1.1 | USP53     | 1.327787022 |
| EIF2AK3          | 3.06E-228 | 1.169206472 | 0.603 | 0.332 | 7.37E-224 | 1.1 | EIF2AK3   | 1.81626506  |
| CXCR4            | 3.42E-227 | 1.355305737 | 0.449 | 0.188 | 8.25E-223 | 1.1 | CXCR4     | 2.388297872 |
| RPS25            | 3.85E-224 | 1.003316356 | 0.862 | 0.723 | 9.28E-220 | 1.1 | RPS25     | 1.192254495 |
| ATP5G2           | 2.65E-223 | 0.91923606  | 0.835 | 0.726 | 6.40E-219 | 1.1 | ATP5G2    | 1.150137741 |
| RP11-608O21.1    | 2.87E-222 | 0.938462359 | 0.747 | 0.511 | 6.93E-218 | 1.1 | RP11-608O | 1.46183953  |
| ABI1             | 1.29E-215 | 0.901388603 | 0.831 | 0.659 | 3.10E-211 | 1.1 | ABI1      | 1.261001517 |
| ZMYM4            | 8.54E-213 | 0.781399888 | 0.893 | 0.806 | 2.06E-208 | 1.1 | ZMYM4     | 1.107940447 |
| S100B            | 1.49E-212 | 0.482134736 | 0.117 | 0.012 | 3.58E-208 | 1.1 | S100B     | 9.75        |
| KIAA0922         | 1.60E-212 | 1.369871091 | 0.409 | 0.17  | 3.87E-208 | 1.1 | KIAA0922  | 2.405882353 |
| CNKSR3           | 8.72E-209 | 1.003413261 | 0.554 | 0.276 | 2.10E-204 | 1.1 | CNKSR3    | 2.007246377 |
| TBC1D3P1-DHX40P1 | 6.67E-208 | 0.965940762 | 0.757 | 0.567 | 1.61E-203 | 1.1 | TBC1D3P1- | 1.335097002 |
| RPL23            | 3.33E-201 | 0.542748409 | 0.968 | 0.909 | 8.02E-197 | 1.1 | RPL23     | 1.064906491 |
| RPS20            | 5.91E-201 | 0.913810581 | 0.962 | 0.919 | 1.43E-196 | 1.1 | RPS20     | 1.046789989 |
| RPL10            | 4.08E-198 | 1.170904181 | 0.977 | 0.93  | 9.83E-194 | 1.1 | RPL10     | 1.050537634 |
| LPIN1            | 1.09E-197 | 0.996681705 | 0.419 | 0.178 | 2.64E-193 | 1.1 | LPIN1     | 2.353932584 |

|           |           |             |       |       |           |     |           |             |
|-----------|-----------|-------------|-------|-------|-----------|-----|-----------|-------------|
| METTL17   | 2.32E-197 | 0.524309755 | 0.148 | 0.024 | 5.58E-193 | 1.1 | METTL17   | 6.166666667 |
| TCF7L1    | 3.99E-195 | 0.9939512   | 0.39  | 0.157 | 9.63E-191 | 1.1 | TCF7L1    | 2.484076433 |
| TRIO      | 4.36E-195 | 0.82194139  | 0.905 | 0.797 | 1.05E-190 | 1.1 | TRIO      | 1.135508156 |
| ELF5      | 1.56E-194 | 0.855341859 | 0.336 | 0.118 | 3.76E-190 | 1.1 | ELF5      | 2.847457627 |
| RPS13     | 9.95E-193 | 1.074048007 | 0.829 | 0.687 | 2.40E-188 | 1.1 | RPS13     | 1.206695779 |
| CORO1C    | 5.70E-192 | 0.871493011 | 0.398 | 0.162 | 1.38E-187 | 1.1 | CORO1C    | 2.456790123 |
| RPS3      | 1.08E-191 | 1.272567063 | 0.927 | 0.861 | 2.62E-187 | 1.1 | RPS3      | 1.076655052 |
| RBM3      | 9.18E-189 | 0.837479932 | 0.627 | 0.379 | 2.21E-184 | 1.1 | RBM3      | 1.654353562 |
| DTNA      | 2.19E-187 | 0.803178523 | 0.882 | 0.742 | 5.29E-183 | 1.1 | DTNA      | 1.188679245 |
| SYNPO2    | 2.53E-187 | 0.902970348 | 0.268 | 0.079 | 6.11E-183 | 1.1 | SYNPO2    | 3.392405063 |
| GLIPR1    | 6.21E-183 | 0.966177533 | 0.389 | 0.158 | 1.50E-178 | 1.1 | GLIPR1    | 2.462025316 |
| NACA2     | 6.38E-182 | 0.952958735 | 0.662 | 0.443 | 1.54E-177 | 1.1 | NACA2     | 1.494356659 |
| SELK      | 1.45E-180 | 0.867304727 | 0.767 | 0.591 | 3.49E-176 | 1.1 | SELK      | 1.297800338 |
| RSL24D1   | 7.91E-180 | 0.737678981 | 0.754 | 0.534 | 1.91E-175 | 1.1 | RSL24D1   | 1.411985019 |
| UBA52     | 2.35E-178 | 0.556280052 | 0.957 | 0.914 | 5.66E-174 | 1.1 | UBA52     | 1.047045952 |
| FAM129A   | 6.15E-175 | 0.993413248 | 0.498 | 0.244 | 1.48E-170 | 1.1 | FAM129A   | 2.040983607 |
| RPS27     | 1.83E-174 | 0.923054897 | 0.79  | 0.617 | 4.42E-170 | 1.1 | RPS27     | 1.280388979 |
| EIF3K     | 1.16E-171 | 0.992176358 | 0.528 | 0.306 | 2.81E-167 | 1.1 | EIF3K     | 1.725490196 |
| EHF       | 2.27E-169 | 1.000460001 | 0.661 | 0.45  | 5.46E-165 | 1.1 | EHF       | 1.468888889 |
| GABRP     | 3.42E-168 | 0.748212357 | 0.496 | 0.235 | 8.26E-164 | 1.1 | GABRP     | 2.110638298 |
| TAF1D     | 5.62E-168 | 0.864964656 | 0.478 | 0.241 | 1.36E-163 | 1.1 | TAF1D     | 1.98340249  |
| HLA-DRA   | 1.78E-166 | 0.666789854 | 0.225 | 0.063 | 4.28E-162 | 1.1 | HLA-DRA   | 3.571428571 |
| BACH2     | 2.78E-166 | 1.032476921 | 0.549 | 0.309 | 6.71E-162 | 1.1 | BACH2     | 1.776699029 |
| GRB14     | 9.89E-165 | 0.961280386 | 0.613 | 0.383 | 2.38E-160 | 1.1 | GRB14     | 1.600522193 |
| PHLPP1    | 8.39E-164 | 1.035935434 | 0.586 | 0.376 | 2.02E-159 | 1.1 | PHLPP1    | 1.558510638 |
| ESD       | 1.02E-162 | 0.820287888 | 0.519 | 0.288 | 2.47E-158 | 1.1 | ESD       | 1.802083333 |
| WAC       | 2.01E-162 | 0.774518813 | 0.769 | 0.611 | 4.86E-158 | 1.1 | WAC       | 1.258592471 |
| TIMM9     | 4.35E-162 | 0.705120159 | 0.307 | 0.115 | 1.05E-157 | 1.1 | TIMM9     | 2.669565217 |
| ARRDC3    | 2.75E-160 | 0.989160683 | 0.596 | 0.357 | 6.64E-156 | 1.1 | ARRDC3    | 1.669467787 |
| ARHGAP17  | 4.55E-160 | 0.87144267  | 0.338 | 0.138 | 1.10E-155 | 1.1 | ARHGAP17  | 2.449275362 |
| SGMS2     | 5.47E-158 | 0.760031852 | 0.276 | 0.095 | 1.32E-153 | 1.1 | SGMS2     | 2.905263158 |
| RPL38     | 6.60E-157 | 0.518833235 | 0.935 | 0.886 | 1.59E-152 | 1.1 | RPL38     | 1.05530474  |
| RPL19     | 2.11E-156 | 0.911425843 | 0.935 | 0.897 | 5.10E-152 | 1.1 | RPL19     | 1.042363434 |
| EIF3M     | 7.86E-156 | 0.804104705 | 0.526 | 0.307 | 1.90E-151 | 1.1 | EIF3M     | 1.713355049 |
| NDUFS5    | 9.11E-156 | 0.618007805 | 0.866 | 0.76  | 2.20E-151 | 1.1 | NDUFS5    | 1.139473684 |
| EDN1      | 1.62E-154 | 0.86347031  | 0.299 | 0.112 | 3.90E-150 | 1.1 | EDN1      | 2.669642857 |
| SMS       | 2.60E-154 | 1.11867638  | 0.493 | 0.282 | 6.27E-150 | 1.1 | SMS       | 1.74822695  |
| HSP90B1   | 1.56E-153 | 0.826342867 | 0.684 | 0.485 | 3.77E-149 | 1.1 | HSP90B1   | 1.410309278 |
| DAAM1     | 1.65E-153 | 0.943153706 | 0.672 | 0.488 | 3.97E-149 | 1.1 | DAAM1     | 1.37704918  |
| LINC01198 | 4.61E-153 | 0.877604051 | 0.327 | 0.131 | 1.11E-148 | 1.1 | LINC01198 | 2.496183206 |
| RGS2      | 6.04E-153 | 1.499045536 | 0.287 | 0.108 | 1.46E-148 | 1.1 | RGS2      | 2.657407407 |
| RPL22L1   | 7.90E-153 | 0.80583772  | 0.615 | 0.397 | 1.90E-148 | 1.1 | RPL22L1   | 1.549118388 |
| RLF       | 1.56E-152 | 0.981318791 | 0.538 | 0.323 | 3.77E-148 | 1.1 | RLF       | 1.665634675 |
| GOLGA4    | 1.32E-151 | 0.739326719 | 0.764 | 0.602 | 3.19E-147 | 1.1 | GOLGA4    | 1.26910299  |
| ARL4C     | 1.75E-151 | 0.706449143 | 0.257 | 0.087 | 4.23E-147 | 1.1 | ARL4C     | 2.954022989 |
| MGP       | 1.48E-150 | 1.748451701 | 0.893 | 0.809 | 3.57E-146 | 1.1 | MGP       | 1.103831891 |
| HSP90AA1  | 2.15E-149 | 0.671847621 | 0.917 | 0.846 | 5.18E-145 | 1.1 | HSP90AA1  | 1.08392435  |
| HELZ      | 1.33E-148 | 0.826758645 | 0.457 | 0.241 | 3.21E-144 | 1.1 | HELZ      | 1.89626556  |
| NOCT      | 2.73E-147 | 0.723557093 | 0.255 | 0.088 | 6.58E-143 | 1.1 | NOCT      | 2.897727273 |
| TATDN1    | 3.03E-146 | 0.733157327 | 0.397 | 0.189 | 7.31E-142 | 1.1 | TATDN1    | 2.100529101 |
| SSR3      | 3.65E-146 | 0.82025105  | 0.629 | 0.421 | 8.81E-142 | 1.1 | SSR3      | 1.494061758 |
| RPL37     | 6.64E-146 | 0.481089993 | 0.987 | 0.94  | 1.60E-141 | 1.1 | RPL37     | 1.05        |

|           |           |             |       |       |           |     |           |             |
|-----------|-----------|-------------|-------|-------|-----------|-----|-----------|-------------|
| EIF2A     | 1.10E-145 | 0.766618161 | 0.502 | 0.286 | 2.66E-141 | 1.1 | EIF2A     | 1.755244755 |
| C4orf3    | 1.33E-144 | 0.890968953 | 0.694 | 0.516 | 3.21E-140 | 1.1 | C4orf3    | 1.34496124  |
| SERAC1    | 1.55E-144 | 0.583004474 | 0.172 | 0.043 | 3.73E-140 | 1.1 | SERAC1    | 4           |
| MARCH5    | 2.95E-144 | 0.832903991 | 0.417 | 0.205 | 7.12E-140 | 1.1 | MARCH5    | 2.034146341 |
| HADH      | 4.78E-144 | 0.795328341 | 0.251 | 0.086 | 1.15E-139 | 1.1 | HADH      | 2.918604651 |
| IFRD1     | 1.68E-141 | 0.861996972 | 0.542 | 0.327 | 4.04E-137 | 1.1 | IFRD1     | 1.657492355 |
| BDNF-AS   | 2.40E-141 | 0.95043672  | 0.667 | 0.485 | 5.80E-137 | 1.1 | BDNF-AS   | 1.375257732 |
| RARRES3   | 2.87E-141 | 0.781772164 | 0.406 | 0.195 | 6.92E-137 | 1.1 | RARRES3   | 2.082051282 |
| CRIM1     | 3.73E-141 | 0.945677292 | 0.611 | 0.418 | 9.00E-137 | 1.1 | CRIM1     | 1.461722488 |
| ADAM9     | 1.68E-140 | 0.913973408 | 0.705 | 0.551 | 4.06E-136 | 1.1 | ADAM9     | 1.279491833 |
| RPL23A    | 1.76E-140 | 1.027624977 | 0.707 | 0.559 | 4.25E-136 | 1.1 | RPL23A    | 1.264758497 |
| CHCHD3    | 8.78E-139 | 0.619429874 | 0.897 | 0.829 | 2.12E-134 | 1.1 | CHCHD3    | 1.082026538 |
| SASH1     | 3.38E-137 | 0.745696081 | 0.327 | 0.137 | 8.14E-133 | 1.1 | SASH1     | 2.386861314 |
| NFATC2    | 7.04E-137 | 0.786538932 | 0.226 | 0.075 | 1.70E-132 | 1.1 | NFATC2    | 3.013333333 |
| AUH       | 1.58E-135 | 0.869025646 | 0.536 | 0.331 | 3.80E-131 | 1.1 | AUH       | 1.619335347 |
| RPL10A    | 4.73E-134 | 0.836827108 | 0.796 | 0.707 | 1.14E-129 | 1.1 | RPL10A    | 1.125884017 |
| PTPN14    | 5.20E-134 | 1.050936927 | 0.478 | 0.279 | 1.25E-129 | 1.1 | PTPN14    | 1.713261649 |
| PTN       | 9.94E-133 | 1.434841346 | 0.257 | 0.095 | 2.40E-128 | 1.1 | PTN       | 2.705263158 |
| MYO5B     | 3.96E-132 | 0.935463155 | 0.729 | 0.587 | 9.55E-128 | 1.1 | MYO5B     | 1.241908007 |
| HERC1     | 5.70E-132 | 0.916434098 | 0.487 | 0.291 | 1.37E-127 | 1.1 | HERC1     | 1.673539519 |
| CCL28     | 1.14E-131 | 0.436160759 | 0.609 | 0.334 | 2.76E-127 | 1.1 | CCL28     | 1.823353293 |
| CCNB1IP1  | 1.96E-130 | 0.721928567 | 0.431 | 0.23  | 4.73E-126 | 1.1 | CCNB1IP1  | 1.873913043 |
| DIAPH3    | 2.14E-129 | 0.653218013 | 0.195 | 0.058 | 5.16E-125 | 1.1 | DIAPH3    | 3.362068966 |
| NTRK2     | 3.32E-129 | 0.595435209 | 0.24  | 0.084 | 8.01E-125 | 1.1 | NTRK2     | 2.857142857 |
| SPINK5    | 4.40E-129 | 0.377964901 | 0.057 | 0.004 | 1.06E-124 | 1.1 | SPINK5    | 14.25       |
| DDIT3     | 7.86E-129 | 0.786402262 | 0.246 | 0.089 | 1.90E-124 | 1.1 | DDIT3     | 2.764044944 |
| NAV2      | 2.71E-127 | 1.029863729 | 0.577 | 0.395 | 6.54E-123 | 1.1 | NAV2      | 1.460759494 |
| RAD21     | 3.37E-127 | 0.782890024 | 0.512 | 0.314 | 8.13E-123 | 1.1 | RAD21     | 1.630573248 |
| KMT2C     | 8.86E-126 | 0.817010734 | 0.702 | 0.587 | 2.14E-121 | 1.1 | KMT2C     | 1.195911414 |
| FAM172A   | 9.55E-126 | 0.900959259 | 0.75  | 0.601 | 2.30E-121 | 1.1 | FAM172A   | 1.247920133 |
| DAPL1     | 2.24E-125 | 0.419581588 | 0.108 | 0.02  | 5.39E-121 | 1.1 | DAPL1     | 5.4         |
| UQCRC2    | 2.26E-125 | 0.724670707 | 0.505 | 0.308 | 5.44E-121 | 1.1 | UQCRC2    | 1.63961039  |
| LIPH      | 1.12E-124 | 1.055467475 | 0.487 | 0.287 | 2.69E-120 | 1.1 | LIPH      | 1.696864111 |
| BCAS3     | 1.71E-124 | 0.58593674  | 0.824 | 0.728 | 4.12E-120 | 1.1 | BCAS3     | 1.131868132 |
| RPL39     | 1.90E-124 | 0.555961877 | 0.963 | 0.89  | 4.58E-120 | 1.1 | RPL39     | 1.082022472 |
| SNRPD2    | 1.44E-120 | 0.674429204 | 0.761 | 0.662 | 3.47E-116 | 1.1 | SNRPD2    | 1.149546828 |
| COPS2     | 1.47E-120 | 0.673227724 | 0.433 | 0.236 | 3.54E-116 | 1.1 | COPS2     | 1.834745763 |
| NCALD     | 1.80E-118 | 0.840443456 | 0.269 | 0.11  | 4.35E-114 | 1.1 | NCALD     | 2.445454545 |
| LINC00152 | 4.08E-118 | 0.88777416  | 0.49  | 0.302 | 9.84E-114 | 1.1 | LINC00152 | 1.622516556 |
| EML4      | 1.06E-117 | 0.689137479 | 0.321 | 0.146 | 2.55E-113 | 1.1 | EML4      | 2.198630137 |
| WTAP      | 3.12E-117 | 1.118356774 | 0.66  | 0.495 | 7.52E-113 | 1.1 | WTAP      | 1.333333333 |
| PDIA6     | 3.55E-117 | 0.754072637 | 0.398 | 0.21  | 8.55E-113 | 1.1 | PDIA6     | 1.895238095 |
| RPS12     | 9.67E-117 | 1.164360037 | 0.717 | 0.641 | 2.33E-112 | 1.1 | RPS12     | 1.118564743 |
| GBP2      | 1.71E-116 | 0.748354224 | 0.75  | 0.597 | 4.12E-112 | 1.1 | GBP2      | 1.256281407 |
| CPEB3     | 9.44E-116 | 0.827408124 | 0.499 | 0.307 | 2.28E-111 | 1.1 | CPEB3     | 1.625407166 |
| AIMP1     | 2.82E-114 | 0.728398557 | 0.476 | 0.28  | 6.81E-110 | 1.1 | AIMP1     | 1.7         |
| RPLP0     | 5.04E-114 | 0.81214735  | 0.891 | 0.863 | 1.22E-109 | 1.1 | RPLP0     | 1.032444959 |
| AGFG1     | 8.95E-114 | 0.807184004 | 0.486 | 0.3   | 2.16E-109 | 1.1 | AGFG1     | 1.62        |
| HNRNPC    | 6.82E-113 | 0.5857762   | 0.866 | 0.773 | 1.64E-108 | 1.1 | HNRNPC    | 1.120310479 |
| EIF2B5    | 9.31E-113 | 0.925923069 | 0.595 | 0.445 | 2.25E-108 | 1.1 | EIF2B5    | 1.337078652 |
| TNFRSF11A | 1.58E-110 | 0.570674532 | 0.172 | 0.053 | 3.82E-106 | 1.1 | TNFRSF11A | 3.245283019 |
| RUSC2     | 4.29E-110 | 0.530518288 | 0.176 | 0.055 | 1.03E-105 | 1.1 | RUSC2     | 3.2         |

|               |           |             |       |       |           |     |            |             |
|---------------|-----------|-------------|-------|-------|-----------|-----|------------|-------------|
| DAPK1         | 5.94E-110 | 0.754920998 | 0.664 | 0.517 | 1.43E-105 | 1.1 | DAPK1      | 1.284332689 |
| PLIN2         | 2.71E-109 | 0.747938252 | 0.216 | 0.079 | 6.53E-105 | 1.1 | PLIN2      | 2.734177215 |
| CTC-471J1.9   | 1.18E-108 | 0.674334224 | 0.742 | 0.623 | 2.84E-104 | 1.1 | CTC-471J1. | 1.191011236 |
| BTAF1         | 3.71E-107 | 0.704701342 | 0.376 | 0.198 | 8.96E-103 | 1.1 | BTAF1      | 1.898989899 |
| ZFAND1        | 1.48E-106 | 0.612871652 | 0.334 | 0.164 | 3.56E-102 | 1.1 | ZFAND1     | 2.036585366 |
| APEX1         | 4.92E-106 | 0.648869252 | 0.348 | 0.175 | 1.19E-101 | 1.1 | APEX1      | 1.988571429 |
| KLK5          | 9.48E-106 | 0.453109466 | 0.108 | 0.023 | 2.29E-101 | 1.1 | KLK5       | 4.695652174 |
| RP5-945F2.3   | 9.67E-106 | 0.772360816 | 0.128 | 0.032 | 2.33E-101 | 1.1 | RP5-945F2. | 4           |
| RIOK3         | 8.95E-105 | 0.735595605 | 0.428 | 0.248 | 2.16E-100 | 1.1 | RIOK3      | 1.725806452 |
| FGFR1         | 1.30E-103 | 0.801570575 | 0.345 | 0.174 | 3.13E-99  | 1.1 | FGFR1      | 1.982758621 |
| SLC20A2       | 1.85E-102 | 0.762832234 | 0.489 | 0.305 | 4.46E-98  | 1.1 | SLC20A2    | 1.603278689 |
| LDHA          | 1.56E-101 | 0.809242946 | 0.761 | 0.656 | 3.77E-97  | 1.1 | LDHA       | 1.160060976 |
| CAMK1D        | 4.72E-100 | 0.695253816 | 0.252 | 0.107 | 1.14E-95  | 1.1 | CAMK1D     | 2.355140187 |
| MIR222HG      | 6.34E-100 | 0.515345491 | 0.15  | 0.045 | 1.53E-95  | 1.1 | MIR222HG   | 3.333333333 |
| QKI           | 9.95E-100 | 0.757897164 | 0.655 | 0.526 | 2.40E-95  | 1.1 | QKI        | 1.245247148 |
| STEAP1B       | 3.81E-99  | 0.727868026 | 0.975 | 0.928 | 9.18E-95  | 1.1 | STEAP1B    | 1.050646552 |
| BCL2L14       | 7.85E-99  | 0.538346302 | 0.226 | 0.089 | 1.89E-94  | 1.1 | BCL2L14    | 2.539325843 |
| CASC8         | 8.84E-99  | 0.333396564 | 0.128 | 0.034 | 2.13E-94  | 1.1 | CASC8      | 3.764705882 |
| MKL1          | 8.67E-97  | 0.841328413 | 0.623 | 0.482 | 2.09E-92  | 1.1 | MKL1       | 1.29253112  |
| SERTAD2       | 1.26E-96  | 0.686380999 | 0.305 | 0.148 | 3.05E-92  | 1.1 | SERTAD2    | 2.060810811 |
| CBX1          | 7.26E-96  | 0.575254429 | 0.232 | 0.096 | 1.75E-91  | 1.1 | CBX1       | 2.416666667 |
| BBOX1         | 1.47E-94  | 0.730571761 | 0.251 | 0.108 | 3.54E-90  | 1.1 | BBOX1      | 2.324074074 |
| CTSV          | 3.20E-93  | 1.079968157 | 0.235 | 0.099 | 7.73E-89  | 1.1 | CTSV       | 2.373737374 |
| RPL37A        | 5.63E-93  | 0.380297048 | 0.995 | 0.972 | 1.36E-88  | 1.1 | RPL37A     | 1.023662551 |
| DENND5A       | 7.88E-92  | 0.679902942 | 0.494 | 0.32  | 1.90E-87  | 1.1 | DENND5A    | 1.54375     |
| FXR1          | 6.51E-91  | 0.632548138 | 0.501 | 0.331 | 1.57E-86  | 1.1 | FXR1       | 1.513595166 |
| RANBP2        | 7.97E-91  | 0.636881832 | 0.366 | 0.202 | 1.92E-86  | 1.1 | RANBP2     | 1.811881188 |
| SNRPD1        | 4.75E-90  | 0.641714592 | 0.434 | 0.267 | 1.15E-85  | 1.1 | SNRPD1     | 1.625468165 |
| TGFBR3        | 2.26E-89  | 0.616098399 | 0.212 | 0.085 | 5.46E-85  | 1.1 | TGFBR3     | 2.494117647 |
| TRIM2         | 3.80E-89  | 0.629263905 | 0.307 | 0.154 | 9.15E-85  | 1.1 | TRIM2      | 1.993506494 |
| BARX2         | 4.18E-89  | 0.739500262 | 0.401 | 0.231 | 1.01E-84  | 1.1 | BARX2      | 1.735930736 |
| BIRC3         | 1.54E-88  | 0.746164948 | 0.738 | 0.596 | 3.71E-84  | 1.1 | BIRC3      | 1.238255034 |
| SSR2          | 2.67E-87  | 0.531512278 | 0.765 | 0.676 | 6.44E-83  | 1.1 | SSR2       | 1.131656805 |
| KIZ-AS1       | 2.84E-86  | 0.584043206 | 0.925 | 0.833 | 6.84E-82  | 1.1 | KIZ-AS1    | 1.110444178 |
| MT-ND4        | 1.34E-85  | 0.36355877  | 0.996 | 0.993 | 3.24E-81  | 1.1 | MT-ND4     | 1.003021148 |
| CRABP1        | 4.17E-85  | 0.121235167 | 0.04  | 0.003 | 1.01E-80  | 1.1 | CRABP1     | 13.33333333 |
| ALDH1A3       | 5.15E-85  | 0.533253298 | 0.439 | 0.255 | 1.24E-80  | 1.1 | ALDH1A3    | 1.721568627 |
| B2M           | 5.60E-85  | 0.236424362 | 0.995 | 0.968 | 1.35E-80  | 1.1 | B2M        | 1.027892562 |
| FNBP1L        | 7.22E-85  | 0.767009728 | 0.55  | 0.403 | 1.74E-80  | 1.1 | FNBP1L     | 1.364764268 |
| GJA1          | 7.82E-85  | 0.393806032 | 0.093 | 0.021 | 1.89E-80  | 1.1 | GJA1       | 4.428571429 |
| EIF3H         | 1.46E-84  | 0.519332186 | 0.719 | 0.613 | 3.51E-80  | 1.1 | EIF3H      | 1.172920065 |
| TEX14         | 1.77E-84  | 0.88701034  | 0.276 | 0.134 | 4.28E-80  | 1.1 | TEX14      | 2.059701493 |
| RP11-286E11.1 | 1.19E-83  | 0.369577839 | 0.103 | 0.026 | 2.88E-79  | 1.1 | RP11-286E  | 3.961538462 |
| TM4SF1        | 5.76E-83  | 0.710879909 | 0.936 | 0.903 | 1.39E-78  | 1.1 | TM4SF1     | 1.03654485  |
| EPB41L2       | 1.46E-82  | 0.772676494 | 0.223 | 0.098 | 3.52E-78  | 1.1 | EPB41L2    | 2.275510204 |
| PDK1          | 1.92E-82  | 0.536854711 | 0.204 | 0.083 | 4.64E-78  | 1.1 | PDK1       | 2.457831325 |
| HK2           | 2.64E-82  | 0.592547159 | 0.298 | 0.151 | 6.37E-78  | 1.1 | HK2        | 1.973509934 |
| EIF4A1        | 5.19E-82  | 0.565585767 | 0.553 | 0.385 | 1.25E-77  | 1.1 | EIF4A1     | 1.436363636 |
| SOSTDC1       | 7.86E-82  | 0.252362251 | 0.053 | 0.007 | 1.90E-77  | 1.1 | SOSTDC1    | 7.571428571 |
| TGFB2         | 1.40E-81  | 0.664088168 | 0.325 | 0.172 | 3.36E-77  | 1.1 | TGFB2      | 1.889534884 |
| SLC9A7        | 2.76E-81  | 0.705169266 | 0.424 | 0.265 | 6.65E-77  | 1.1 | SLC9A7     | 1.6         |
| FLNB          | 3.42E-81  | 0.580837827 | 0.596 | 0.44  | 8.25E-77  | 1.1 | FLNB       | 1.354545455 |

|               |          |             |       |       |          |     |            |             |
|---------------|----------|-------------|-------|-------|----------|-----|------------|-------------|
| RP11-817J15.2 | 4.29E-81 | 0.407967667 | 0.133 | 0.042 | 1.03E-76 | 1.1 | RP11-817J1 | 3.166666667 |
| GSTA1         | 5.85E-81 | 0.714903537 | 0.115 | 0.032 | 1.41E-76 | 1.1 | GSTA1      | 3.59375     |
| SNX18         | 6.99E-81 | 0.317694529 | 0.11  | 0.03  | 1.68E-76 | 1.1 | SNX18      | 3.666666667 |
| KDM5B         | 2.82E-80 | 0.638246885 | 0.635 | 0.534 | 6.79E-76 | 1.1 | KDM5B      | 1.189138577 |
| RAD23B        | 5.42E-80 | 0.626739336 | 0.611 | 0.469 | 1.31E-75 | 1.1 | RAD23B     | 1.302771855 |
| SKP1          | 6.26E-80 | 0.477897724 | 0.874 | 0.798 | 1.51E-75 | 1.1 | SKP1       | 1.095238095 |
| IGFBP3        | 1.01E-79 | 0.571954088 | 0.143 | 0.047 | 2.43E-75 | 1.1 | IGFBP3     | 3.042553191 |
| AMBRA1        | 1.13E-79 | 0.632092758 | 0.737 | 0.67  | 2.71E-75 | 1.1 | AMBRA1     | 1.1         |
| PFDN4         | 1.17E-79 | 0.585369583 | 0.48  | 0.318 | 2.83E-75 | 1.1 | PFDN4      | 1.509433962 |
| EPB42         | 7.75E-79 | 0.65874273  | 0.961 | 0.887 | 1.87E-74 | 1.1 | EPB42      | 1.083427283 |
| DMD           | 8.47E-78 | 0.654277724 | 0.404 | 0.242 | 2.04E-73 | 1.1 | DMD        | 1.669421488 |
| IL22RA2       | 1.64E-77 | 0.152778029 | 0.043 | 0.005 | 3.96E-73 | 1.1 | IL22RA2    | 8.6         |
| RPL6          | 1.67E-77 | 0.441482976 | 0.966 | 0.947 | 4.02E-73 | 1.1 | RPL6       | 1.020063358 |
| CRY1          | 3.64E-77 | 0.696480962 | 0.523 | 0.369 | 8.78E-73 | 1.1 | CRY1       | 1.417344173 |
| CLDN1         | 4.12E-77 | 0.76381677  | 0.367 | 0.21  | 9.93E-73 | 1.1 | CLDN1      | 1.747619048 |
| MAP2K6        | 6.44E-77 | 0.227720427 | 0.064 | 0.011 | 1.55E-72 | 1.1 | MAP2K6     | 5.818181818 |
| ETV6          | 9.65E-77 | 0.591792243 | 0.684 | 0.564 | 2.33E-72 | 1.1 | ETV6       | 1.212765957 |
| RP11-244M2.1  | 4.91E-76 | 0.596233918 | 0.535 | 0.394 | 1.18E-71 | 1.1 | RP11-244M  | 1.35786802  |
| ITGB8         | 1.33E-75 | 0.504582047 | 0.654 | 0.477 | 3.21E-71 | 1.1 | ITGB8      | 1.371069182 |
| SH3GL1        | 2.59E-75 | 0.432481875 | 0.155 | 0.057 | 6.25E-71 | 1.1 | SH3GL1     | 2.719298246 |
| FAS           | 9.85E-75 | 0.505870817 | 0.201 | 0.086 | 2.37E-70 | 1.1 | FAS        | 2.337209302 |
| PIK3C2G       | 1.80E-74 | 0.423659338 | 0.15  | 0.053 | 4.33E-70 | 1.1 | PIK3C2G    | 2.830188679 |
| NDRG1         | 1.95E-74 | 0.962926895 | 0.475 | 0.336 | 4.71E-70 | 1.1 | NDRG1      | 1.413690476 |
| CXCL3         | 2.13E-73 | 0.624477003 | 0.143 | 0.05  | 5.13E-69 | 1.1 | CXCL3      | 2.86        |
| PDK3          | 2.99E-73 | 0.756893025 | 0.358 | 0.213 | 7.21E-69 | 1.1 | PDK3       | 1.680751174 |
| GCNT1         | 8.05E-73 | 0.502154546 | 0.136 | 0.047 | 1.94E-68 | 1.1 | GCNT1      | 2.893617021 |
| PTPRJ         | 2.03E-72 | 0.661822803 | 0.438 | 0.291 | 4.89E-68 | 1.1 | PTPRJ      | 1.505154639 |
| TSC22D2       | 6.17E-72 | 0.42064462  | 0.614 | 0.449 | 1.49E-67 | 1.1 | TSC22D2    | 1.367483296 |
| FBL           | 1.21E-71 | 0.437073919 | 0.248 | 0.12  | 2.92E-67 | 1.1 | FBL        | 2.066666667 |
| IGF2BP2-AS1   | 1.68E-71 | 0.272591388 | 0.074 | 0.016 | 4.05E-67 | 1.1 | IGF2BP2-A' | 4.625       |
| CCDC6         | 8.34E-71 | 0.652747624 | 0.449 | 0.302 | 2.01E-66 | 1.1 | CCDC6      | 1.486754967 |
| ATP13A3       | 3.21E-70 | 0.685147907 | 0.387 | 0.246 | 7.73E-66 | 1.1 | ATP13A3    | 1.573170732 |
| HILPDA        | 5.49E-70 | 0.408922313 | 0.428 | 0.26  | 1.32E-65 | 1.1 | HILPDA     | 1.646153846 |
| ENAH          | 8.23E-70 | 0.619757792 | 0.655 | 0.541 | 1.99E-65 | 1.1 | ENAH       | 1.210720887 |
| EMP1          | 1.03E-69 | 1.163682762 | 0.696 | 0.687 | 2.48E-65 | 1.1 | EMP1       | 1.013100437 |
| PPP1CB        | 1.51E-69 | 0.639186743 | 0.478 | 0.339 | 3.65E-65 | 1.1 | PPP1CB     | 1.410029499 |
| MTRNR2L8      | 2.12E-69 | 0.469165455 | 0.254 | 0.126 | 5.11E-65 | 1.1 | MTRNR2L8   | 2.015873016 |
| HCAR2         | 2.81E-69 | 0.811637307 | 0.202 | 0.091 | 6.78E-65 | 1.1 | HCAR2      | 2.21978022  |
| UQCRHL        | 9.28E-69 | 0.510594464 | 0.302 | 0.168 | 2.24E-64 | 1.1 | UQCRHL     | 1.797619048 |
| RP11-511B23.2 | 1.69E-68 | 0.513361987 | 0.617 | 0.494 | 4.08E-64 | 1.1 | RP11-511B  | 1.248987854 |
| EIF4B         | 1.05E-67 | 0.523925341 | 0.511 | 0.365 | 2.52E-63 | 1.1 | EIF4B      | 1.4         |
| CCT2          | 1.93E-66 | 0.533506083 | 0.435 | 0.286 | 4.66E-62 | 1.1 | CCT2       | 1.520979021 |
| RPF2          | 4.82E-66 | 0.476540241 | 0.243 | 0.121 | 1.16E-61 | 1.1 | RPF2       | 2.008264463 |
| GALNT1        | 1.89E-65 | 0.505802641 | 0.206 | 0.096 | 4.56E-61 | 1.1 | GALNT1     | 2.145833333 |
| NAA25         | 2.73E-65 | 0.564991442 | 0.484 | 0.335 | 6.59E-61 | 1.1 | NAA25      | 1.444776119 |
| RPS11         | 4.02E-65 | 0.7017662   | 0.78  | 0.769 | 9.69E-61 | 1.1 | RPS11      | 1.014304291 |
| SAR1B         | 5.34E-65 | 0.666808858 | 0.496 | 0.357 | 1.29E-60 | 1.1 | SAR1B      | 1.389355742 |
| RP5-896L10.1  | 8.67E-65 | 0.491938731 | 0.355 | 0.214 | 2.09E-60 | 1.1 | RP5-896L10 | 1.658878505 |
| RSRC2         | 2.27E-64 | 0.546660352 | 0.708 | 0.615 | 5.47E-60 | 1.1 | RSRC2      | 1.151219512 |
| ARID5B        | 2.68E-64 | 0.519990196 | 0.791 | 0.727 | 6.46E-60 | 1.1 | ARID5B     | 1.088033012 |
| LIMS1         | 4.35E-64 | 0.752305711 | 0.359 | 0.229 | 1.05E-59 | 1.1 | LIMS1      | 1.56768559  |
| NUP153        | 6.52E-64 | 0.557789183 | 0.414 | 0.267 | 1.57E-59 | 1.1 | NUP153     | 1.550561798 |

|          |          |             |       |       |          |     |          |             |
|----------|----------|-------------|-------|-------|----------|-----|----------|-------------|
| USP54    | 8.37E-64 | 0.631200938 | 0.607 | 0.483 | 2.02E-59 | 1.1 | USP54    | 1.256728778 |
| SESTD1   | 1.38E-63 | 0.544120615 | 0.603 | 0.474 | 3.32E-59 | 1.1 | SESTD1   | 1.272151899 |
| GGA2     | 1.54E-63 | 0.457810356 | 0.202 | 0.094 | 3.72E-59 | 1.1 | GGA2     | 2.14893617  |
| SH3BP5   | 2.72E-63 | 0.331366124 | 0.129 | 0.046 | 6.55E-59 | 1.1 | SH3BP5   | 2.804347826 |
| MT-CO1   | 4.68E-63 | 0.236417338 | 0.996 | 0.991 | 1.13E-58 | 1.1 | MT-CO1   | 1.005045409 |
| TULP4    | 5.99E-63 | 0.683847228 | 0.59  | 0.491 | 1.44E-58 | 1.1 | TULP4    | 1.201629328 |
| KPNA1    | 9.42E-63 | 0.619354318 | 0.387 | 0.252 | 2.27E-58 | 1.1 | KPNA1    | 1.535714286 |
| PPP2CB   | 1.27E-62 | 0.554750816 | 0.464 | 0.324 | 3.05E-58 | 1.1 | PPP2CB   | 1.432098765 |
| MTRNR2L1 | 1.83E-62 | 0.416150379 | 0.216 | 0.102 | 4.41E-58 | 1.1 | MTRNR2L1 | 2.117647059 |
| ATP6VOA1 | 2.11E-62 | 0.485011945 | 0.247 | 0.126 | 5.09E-58 | 1.1 | ATP6VOA1 | 1.96031746  |
| HCFC2    | 2.27E-62 | 0.221591097 | 0.068 | 0.015 | 5.46E-58 | 1.1 | HCFC2    | 4.533333333 |
| PIM1     | 2.93E-62 | 0.196195186 | 0.057 | 0.011 | 7.06E-58 | 1.1 | PIM1     | 5.181818182 |
| CYP2U1   | 4.14E-62 | 0.157795371 | 0.051 | 0.009 | 9.99E-58 | 1.1 | CYP2U1   | 5.666666667 |
| ACTN4    | 5.72E-62 | 0.56229782  | 0.399 | 0.258 | 1.38E-57 | 1.1 | ACTN4    | 1.546511628 |
| TPT1-AS1 | 9.08E-62 | 0.520515552 | 0.358 | 0.219 | 2.19E-57 | 1.1 | TPT1-AS1 | 1.634703196 |
| PTEN     | 1.21E-61 | 0.594328887 | 0.862 | 0.801 | 2.92E-57 | 1.1 | PTEN     | 1.076154806 |
| SEC62    | 3.26E-61 | 0.540325794 | 0.679 | 0.566 | 7.85E-57 | 1.1 | SEC62    | 1.199646643 |
| C5orf46  | 4.05E-61 | 0.497640402 | 0.217 | 0.105 | 9.76E-57 | 1.1 | C5orf46  | 2.066666667 |
| RPS8     | 4.35E-61 | 0.499694364 | 0.758 | 0.736 | 1.05E-56 | 1.1 | RPS8     | 1.029891304 |
| NDUFA4   | 8.44E-61 | 0.432693984 | 0.807 | 0.742 | 2.03E-56 | 1.1 | NDUFA4   | 1.087601078 |
| ESYT2    | 1.22E-60 | 0.610461351 | 0.614 | 0.5   | 2.93E-56 | 1.1 | ESYT2    | 1.228       |
| HNRNPA3  | 8.33E-60 | 0.496000591 | 0.386 | 0.248 | 2.01E-55 | 1.1 | HNRNPA3  | 1.556451613 |
| STRN     | 4.41E-59 | 0.578954251 | 0.513 | 0.383 | 1.06E-54 | 1.1 | STRN     | 1.339425587 |
| RPL9     | 5.68E-59 | 0.480610895 | 0.668 | 0.557 | 1.37E-54 | 1.1 | RPL9     | 1.199281867 |
| DDX24    | 7.08E-59 | 0.557193542 | 0.607 | 0.494 | 1.71E-54 | 1.1 | DDX24    | 1.228744939 |
| PELI1    | 9.60E-59 | 0.639700068 | 0.447 | 0.314 | 2.31E-54 | 1.1 | PELI1    | 1.423566879 |
| ARF4     | 1.18E-58 | 0.481858485 | 0.702 | 0.609 | 2.85E-54 | 1.1 | ARF4     | 1.15270936  |
| EPHA4    | 5.39E-58 | 0.310209022 | 0.076 | 0.02  | 1.30E-53 | 1.1 | EPHA4    | 3.8         |
| TMEM123  | 7.60E-58 | 0.585838478 | 0.419 | 0.289 | 1.83E-53 | 1.1 | TMEM123  | 1.44982699  |
| RPL12    | 9.60E-58 | 0.537020192 | 0.406 | 0.272 | 2.31E-53 | 1.1 | RPL12    | 1.492647059 |
| IPO7     | 1.20E-57 | 0.511962642 | 0.371 | 0.238 | 2.90E-53 | 1.1 | IPO7     | 1.558823529 |
| CD83     | 1.25E-57 | 0.479773263 | 0.146 | 0.059 | 3.02E-53 | 1.1 | CD83     | 2.474576271 |
| HEY2     | 2.09E-57 | 0.20651543  | 0.058 | 0.012 | 5.03E-53 | 1.1 | HEY2     | 4.833333333 |
| PPP1R14C | 2.40E-57 | 0.480379338 | 0.185 | 0.086 | 5.79E-53 | 1.1 | PPP1R14C | 2.151162791 |
| IFFO2    | 3.46E-57 | 0.472812551 | 0.213 | 0.104 | 8.34E-53 | 1.1 | IFFO2    | 2.048076923 |
| SNRPE    | 3.51E-57 | 0.447253301 | 0.622 | 0.509 | 8.46E-53 | 1.1 | SNRPE    | 1.222003929 |
| CELF2    | 4.77E-57 | 0.453919667 | 0.221 | 0.112 | 1.15E-52 | 1.1 | CELF2    | 1.973214286 |
| RPS29    | 5.29E-57 | 0.334647477 | 0.976 | 0.918 | 1.28E-52 | 1.1 | RPS29    | 1.063180828 |
| PPTC7    | 9.14E-57 | 0.608447795 | 0.306 | 0.181 | 2.20E-52 | 1.1 | PPTC7    | 1.690607735 |
| UQCRB    | 1.18E-56 | 0.329536532 | 0.853 | 0.8   | 2.85E-52 | 1.1 | UQCRB    | 1.06625     |
| FAM168A  | 1.22E-56 | 0.412575394 | 0.277 | 0.155 | 2.93E-52 | 1.1 | FAM168A  | 1.787096774 |
| MICAL3   | 6.83E-56 | 0.598721617 | 0.349 | 0.221 | 1.65E-51 | 1.1 | MICAL3   | 1.57918552  |
| COL6A2   | 1.48E-55 | 0.476811966 | 0.142 | 0.058 | 3.57E-51 | 1.1 | COL6A2   | 2.448275862 |
| MRPS33   | 1.64E-55 | 0.500239396 | 0.354 | 0.226 | 3.95E-51 | 1.1 | MRPS33   | 1.566371681 |
| MT-CYB   | 1.78E-55 | 0.267038219 | 0.992 | 0.991 | 4.30E-51 | 1.1 | MT-CYB   | 1.001009082 |
| RSBN1L   | 1.91E-55 | 0.482743038 | 0.189 | 0.089 | 4.60E-51 | 1.1 | RSBN1L   | 2.123595506 |
| NCOA7    | 3.37E-54 | 0.487944331 | 0.573 | 0.424 | 8.13E-50 | 1.1 | NCOA7    | 1.351415094 |
| TGFBR2   | 7.76E-54 | 0.464806616 | 0.171 | 0.079 | 1.87E-49 | 1.1 | TGFBR2   | 2.164556962 |
| MEST     | 1.15E-53 | 0.268815615 | 0.078 | 0.022 | 2.77E-49 | 1.1 | MEST     | 3.545454545 |
| C11orf1  | 1.31E-53 | 0.418369211 | 0.231 | 0.123 | 3.16E-49 | 1.1 | C11orf1  | 1.87804878  |
| ZNF292   | 7.15E-53 | 0.504557836 | 0.652 | 0.554 | 1.72E-48 | 1.1 | ZNF292   | 1.176895307 |
| IQCG     | 7.88E-53 | 0.539883012 | 0.277 | 0.162 | 1.90E-48 | 1.1 | IQCG     | 1.709876543 |



|               |          |             |       |       |          |     |               |             |
|---------------|----------|-------------|-------|-------|----------|-----|---------------|-------------|
| MT-ND4L       | 1.02E-52 | 0.484867765 | 0.554 | 0.442 | 2.45E-48 | 1.1 | MT-ND4L       | 1.253393665 |
| SVIL          | 3.81E-52 | 0.328308396 | 0.72  | 0.568 | 9.19E-48 | 1.1 | SVIL          | 1.267605634 |
| BACE2         | 7.10E-52 | 0.547563445 | 0.422 | 0.299 | 1.71E-47 | 1.1 | BACE2         | 1.411371237 |
| WWTR1         | 1.56E-51 | 0.587010693 | 0.453 | 0.333 | 3.76E-47 | 1.1 | WWTR1         | 1.36036036  |
| KCTD9         | 2.27E-51 | 0.660204076 | 0.339 | 0.221 | 5.47E-47 | 1.1 | KCTD9         | 1.533936652 |
| SEC24A        | 2.84E-51 | 0.543384011 | 0.276 | 0.163 | 6.84E-47 | 1.1 | SEC24A        | 1.693251534 |
| ADGRL3-AS1    | 3.20E-51 | 0.499836297 | 0.692 | 0.586 | 7.71E-47 | 1.1 | ADGRL3-AS1    | 1.180887372 |
| CYCS          | 4.24E-51 | 0.479544272 | 0.624 | 0.508 | 1.02E-46 | 1.1 | CYCS          | 1.228346457 |
| SNHG8         | 4.65E-51 | 0.493018093 | 0.336 | 0.213 | 1.12E-46 | 1.1 | SNHG8         | 1.577464789 |
| MET           | 5.57E-51 | 0.715126535 | 0.326 | 0.214 | 1.34E-46 | 1.1 | MET           | 1.523364486 |
| MEAF6         | 6.34E-51 | 0.446484006 | 0.273 | 0.156 | 1.53E-46 | 1.1 | MEAF6         | 1.75        |
| RASGEF1C      | 2.19E-50 | 0.327274068 | 0.093 | 0.031 | 5.27E-46 | 1.1 | RASGEF1C      | 3           |
| ELF3          | 2.36E-50 | 0.636128514 | 0.605 | 0.503 | 5.70E-46 | 1.1 | ELF3          | 1.2027833   |
| MAP4K5        | 4.81E-50 | 0.618554631 | 0.391 | 0.273 | 1.16E-45 | 1.1 | MAP4K5        | 1.432234432 |
| CLINT1        | 5.02E-50 | 0.58212068  | 0.353 | 0.235 | 1.21E-45 | 1.1 | CLINT1        | 1.50212766  |
| FOXK2         | 5.37E-50 | 0.522247303 | 0.326 | 0.209 | 1.29E-45 | 1.1 | FOXK2         | 1.559808612 |
| PTRF          | 9.79E-50 | 0.412422228 | 0.206 | 0.106 | 2.36E-45 | 1.1 | PTRF          | 1.943396226 |
| MYC           | 1.18E-49 | 0.466590213 | 0.196 | 0.099 | 2.84E-45 | 1.1 | MYC           | 1.97979798  |
| PEG10         | 1.66E-49 | 0.29470272  | 0.088 | 0.029 | 4.01E-45 | 1.1 | PEG10         | 3.034482759 |
| FMO2          | 2.25E-49 | 0.299859158 | 0.125 | 0.05  | 5.43E-45 | 1.1 | FMO2          | 2.5         |
| FERMT2        | 2.92E-49 | 0.449816177 | 0.228 | 0.123 | 7.05E-45 | 1.1 | FERMT2        | 1.853658537 |
| ZNF652        | 4.12E-49 | 0.490183179 | 0.541 | 0.434 | 9.93E-45 | 1.1 | ZNF652        | 1.246543779 |
| DBI           | 7.06E-49 | 0.555473227 | 0.709 | 0.648 | 1.70E-44 | 1.1 | DBI           | 1.094135802 |
| BFAR          | 1.67E-48 | 0.402298331 | 0.236 | 0.131 | 4.03E-44 | 1.1 | BFAR          | 1.801526718 |
| UBB           | 1.89E-48 | 0.422759902 | 0.781 | 0.714 | 4.56E-44 | 1.1 | UBB           | 1.093837535 |
| FRMD6         | 2.17E-48 | 0.534232078 | 0.29  | 0.176 | 5.24E-44 | 1.1 | FRMD6         | 1.647727273 |
| RP11-386I14.4 | 2.39E-48 | 0.188234501 | 0.055 | 0.013 | 5.77E-44 | 1.1 | RP11-386I14.4 | 4.230769231 |
| UBAP1         | 2.74E-48 | 0.496484436 | 0.431 | 0.309 | 6.62E-44 | 1.1 | UBAP1         | 1.394822006 |
| RP5-968J1.1   | 4.41E-48 | 0.145075412 | 0.047 | 0.01  | 1.06E-43 | 1.1 | RP5-968J1.1   | 4.7         |
| NSA2          | 1.45E-47 | 0.467122895 | 0.451 | 0.333 | 3.50E-43 | 1.1 | NSA2          | 1.354354354 |
| KCMF1         | 2.29E-47 | 0.54300567  | 0.441 | 0.325 | 5.53E-43 | 1.1 | KCMF1         | 1.356923077 |
| TLE4          | 3.77E-47 | 0.569641302 | 0.442 | 0.327 | 9.08E-43 | 1.1 | TLE4          | 1.351681957 |
| CHIC2         | 8.04E-47 | 0.550949019 | 0.253 | 0.149 | 1.94E-42 | 1.1 | CHIC2         | 1.697986577 |
| SAP18         | 2.00E-46 | 0.388872869 | 0.652 | 0.562 | 4.82E-42 | 1.1 | SAP18         | 1.160142349 |
| NFAT5         | 8.32E-46 | 0.361680483 | 0.705 | 0.62  | 2.01E-41 | 1.1 | NFAT5         | 1.137096774 |
| SEC24B        | 8.43E-46 | 0.476434532 | 0.348 | 0.231 | 2.03E-41 | 1.1 | SEC24B        | 1.506493506 |
| SAMD5         | 1.76E-45 | 0.222485822 | 0.079 | 0.025 | 4.24E-41 | 1.1 | SAMD5         | 3.16        |
| KCTD3         | 2.82E-45 | 0.498668648 | 0.293 | 0.183 | 6.80E-41 | 1.1 | KCTD3         | 1.601092896 |
| RIF1          | 4.92E-45 | 0.481642219 | 0.327 | 0.213 | 1.19E-40 | 1.1 | RIF1          | 1.535211268 |
| CTA-293F17.1  | 1.03E-44 | 0.439380229 | 0.139 | 0.063 | 2.48E-40 | 1.1 | CTA-293F17.1  | 2.206349206 |
| AKT3          | 1.52E-44 | 0.803013643 | 0.432 | 0.336 | 3.67E-40 | 1.1 | AKT3          | 1.285714286 |
| PTBP2         | 1.55E-44 | 0.533441419 | 0.441 | 0.332 | 3.75E-40 | 1.1 | PTBP2         | 1.328313253 |
| NPEPPS        | 2.10E-44 | 0.579466086 | 0.576 | 0.486 | 5.07E-40 | 1.1 | NPEPPS        | 1.185185185 |
| ELL2          | 2.52E-44 | 0.46061667  | 0.757 | 0.689 | 6.09E-40 | 1.1 | ELL2          | 1.098693759 |
| KLF5          | 2.64E-44 | 0.450501829 | 0.259 | 0.153 | 6.37E-40 | 1.1 | KLF5          | 1.692810458 |
| TIAM1         | 3.51E-44 | 0.698201903 | 0.339 | 0.231 | 8.45E-40 | 1.1 | TIAM1         | 1.467532468 |
| THBS1         | 4.52E-44 | 0.455035653 | 0.151 | 0.07  | 1.09E-39 | 1.1 | THBS1         | 2.157142857 |
| FNBP1         | 4.78E-44 | 0.512005285 | 0.606 | 0.518 | 1.15E-39 | 1.1 | FNBP1         | 1.16988417  |
| IFIT2         | 6.33E-44 | 0.462584444 | 0.072 | 0.022 | 1.53E-39 | 1.1 | IFIT2         | 3.272727273 |
| RNMT          | 8.67E-44 | 0.517610977 | 0.426 | 0.317 | 2.09E-39 | 1.1 | RNMT          | 1.34384858  |
| RP11-473I1.5  | 8.70E-44 | 0.211363867 | 0.081 | 0.027 | 2.10E-39 | 1.1 | RP11-473I1.5  | 3           |
| AFTPH         | 2.39E-43 | 0.460524907 | 0.419 | 0.302 | 5.76E-39 | 1.1 | AFTPH         | 1.387417219 |

|               |          |             |       |       |          |     |           |             |
|---------------|----------|-------------|-------|-------|----------|-----|-----------|-------------|
| EIF4E         | 2.71E-43 | 0.462980271 | 0.482 | 0.37  | 6.53E-39 | 1.1 | EIF4E     | 1.302702703 |
| ATP5L         | 4.41E-43 | 0.284876291 | 0.851 | 0.804 | 1.06E-38 | 1.1 | ATP5L     | 1.058457711 |
| LSM5          | 7.14E-43 | 0.429712574 | 0.444 | 0.335 | 1.72E-38 | 1.1 | LSM5      | 1.325373134 |
| FAM160A1      | 8.15E-43 | 0.459369974 | 0.715 | 0.642 | 1.97E-38 | 1.1 | FAM160A1  | 1.113707165 |
| TFG           | 6.86E-42 | 0.484964753 | 0.391 | 0.282 | 1.65E-37 | 1.1 | TFG       | 1.386524823 |
| COX4I1        | 1.11E-41 | 0.461792963 | 0.77  | 0.775 | 2.69E-37 | 1.1 | COX4I1    | 0.993548387 |
| LDHC          | 1.41E-41 | 0.263984251 | 0.064 | 0.019 | 3.40E-37 | 1.1 | LDHC      | 3.368421053 |
| RP11-111E14.1 | 6.07E-41 | 0.218759554 | 0.074 | 0.024 | 1.46E-36 | 1.1 | RP11-111E | 3.083333333 |
| LINC00887     | 6.21E-41 | 0.327667557 | 0.083 | 0.03  | 1.50E-36 | 1.1 | LINC00887 | 2.766666667 |
| RGCC          | 1.13E-40 | 0.243182761 | 0.084 | 0.03  | 2.72E-36 | 1.1 | RGCC      | 2.8         |
| WDR45B        | 1.24E-40 | 0.492063883 | 0.308 | 0.205 | 2.99E-36 | 1.1 | WDR45B    | 1.502439024 |
| MORF4L2       | 2.05E-40 | 0.299471513 | 0.795 | 0.736 | 4.95E-36 | 1.1 | MORF4L2   | 1.080163043 |
| NDUFAF4       | 2.12E-40 | 0.344575044 | 0.141 | 0.067 | 5.12E-36 | 1.1 | NDUFAF4   | 2.104477612 |
| EXOSC8        | 2.35E-40 | 0.378132443 | 0.201 | 0.11  | 5.66E-36 | 1.1 | EXOSC8    | 1.827272727 |
| ZFP36L2       | 3.84E-40 | 0.579374398 | 0.476 | 0.36  | 9.25E-36 | 1.1 | ZFP36L2   | 1.322222222 |
| RAB9A         | 3.95E-40 | 0.45078117  | 0.254 | 0.154 | 9.53E-36 | 1.1 | RAB9A     | 1.649350649 |
| PALMD         | 7.68E-40 | 0.153198983 | 0.05  | 0.013 | 1.85E-35 | 1.1 | PALMD     | 3.846153846 |
| SWAP70        | 9.31E-40 | 0.488079251 | 0.396 | 0.288 | 2.24E-35 | 1.1 | SWAP70    | 1.375       |
| SNRPF         | 1.36E-39 | 0.396485616 | 0.285 | 0.181 | 3.28E-35 | 1.1 | SNRPF     | 1.574585635 |
| JMJD1C        | 1.44E-39 | 0.458901221 | 0.736 | 0.693 | 3.48E-35 | 1.1 | JMJD1C    | 1.062049062 |
| OTUD3         | 1.47E-39 | 0.298842737 | 0.101 | 0.041 | 3.55E-35 | 1.1 | OTUD3     | 2.463414634 |
| LRP2          | 1.52E-39 | 0.498700348 | 0.264 | 0.164 | 3.68E-35 | 1.1 | LRP2      | 1.609756098 |
| SFRP1         | 1.66E-39 | 0.345561731 | 0.33  | 0.213 | 4.01E-35 | 1.1 | SFRP1     | 1.549295775 |
| MARCH7        | 1.68E-39 | 0.44824887  | 0.35  | 0.242 | 4.05E-35 | 1.1 | MARCH7    | 1.446280992 |
| CD74          | 2.17E-39 | 0.281915852 | 0.158 | 0.078 | 5.23E-35 | 1.1 | CD74      | 2.025641026 |
| MT-CO2        | 2.22E-39 | 0.1980003   | 0.985 | 0.987 | 5.35E-35 | 1.1 | MT-CO2    | 0.997973658 |
| STX12         | 2.29E-39 | 0.593659041 | 0.414 | 0.31  | 5.51E-35 | 1.1 | STX12     | 1.335483871 |
| UBE2H         | 2.42E-39 | 0.336828462 | 0.796 | 0.751 | 5.84E-35 | 1.1 | UBE2H     | 1.059920107 |
| ADM           | 2.55E-39 | 0.215962774 | 0.063 | 0.019 | 6.14E-35 | 1.1 | ADM       | 3.315789474 |
| DYRK1A        | 2.80E-39 | 0.525171688 | 0.468 | 0.372 | 6.76E-35 | 1.1 | DYRK1A    | 1.258064516 |
| TMEM159       | 5.96E-39 | 0.430629077 | 0.405 | 0.3   | 1.44E-34 | 1.1 | TMEM159   | 1.35        |
| ATF3          | 1.20E-38 | 0.562070061 | 0.493 | 0.397 | 2.89E-34 | 1.1 | ATF3      | 1.241813602 |
| MTUS1         | 1.22E-38 | 0.495821191 | 0.473 | 0.367 | 2.94E-34 | 1.1 | MTUS1     | 1.288828338 |
| ARHGEF10      | 1.72E-38 | 0.48255606  | 0.312 | 0.208 | 4.16E-34 | 1.1 | ARHGEF10  | 1.5         |
| ADAM17        | 3.98E-38 | 0.498182299 | 0.469 | 0.372 | 9.60E-34 | 1.1 | ADAM17    | 1.260752688 |
| C2orf88       | 5.58E-38 | 0.444319521 | 0.442 | 0.338 | 1.35E-33 | 1.1 | C2orf88   | 1.307692308 |
| CCT8          | 5.74E-38 | 0.426217051 | 0.376 | 0.27  | 1.38E-33 | 1.1 | CCT8      | 1.392592593 |
| USP6NL        | 6.20E-38 | 0.467788728 | 0.276 | 0.176 | 1.50E-33 | 1.1 | USP6NL    | 1.568181818 |
| RAPGEF2       | 1.01E-37 | 0.546878456 | 0.506 | 0.412 | 2.44E-33 | 1.1 | RAPGEF2   | 1.22815534  |
| TES           | 1.12E-37 | 0.44648535  | 0.404 | 0.299 | 2.70E-33 | 1.1 | TES       | 1.351170569 |
| WDR33         | 1.79E-37 | 0.418348817 | 0.359 | 0.254 | 4.32E-33 | 1.1 | WDR33     | 1.413385827 |
| C1orf198      | 3.14E-37 | 0.261538859 | 0.103 | 0.043 | 7.58E-33 | 1.1 | C1orf198  | 2.395348837 |
| SLC39A2       | 3.34E-37 | 0.101378187 | 0.025 | 0.004 | 8.05E-33 | 1.1 | SLC39A2   | 6.25        |
| PUM1          | 3.37E-37 | 0.435514018 | 0.57  | 0.489 | 8.12E-33 | 1.1 | PUM1      | 1.165644172 |
| MAP3K13       | 6.27E-37 | 0.431463597 | 0.7   | 0.611 | 1.51E-32 | 1.1 | MAP3K13   | 1.145662848 |
| TNRC6A        | 8.46E-37 | 0.471883904 | 0.312 | 0.212 | 2.04E-32 | 1.1 | TNRC6A    | 1.471698113 |
| GNL2          | 8.86E-37 | 0.313187921 | 0.149 | 0.075 | 2.14E-32 | 1.1 | GNL2      | 1.986666667 |
| HADHA         | 1.10E-36 | 0.418974636 | 0.373 | 0.272 | 2.66E-32 | 1.1 | HADHA     | 1.371323529 |
| ZNF592        | 1.90E-36 | 0.375065202 | 0.192 | 0.107 | 4.59E-32 | 1.1 | ZNF592    | 1.794392523 |
| TOMM20        | 2.39E-36 | 0.347331826 | 0.284 | 0.182 | 5.77E-32 | 1.1 | TOMM20    | 1.56043956  |
| SLC2A1        | 3.36E-36 | 0.3483585   | 0.15  | 0.075 | 8.11E-32 | 1.1 | SLC2A1    | 2           |
| PSMB7         | 3.80E-36 | 0.333924766 | 0.554 | 0.44  | 9.17E-32 | 1.1 | PSMB7     | 1.259090909 |

|               |          |             |       |       |          |     |            |             |
|---------------|----------|-------------|-------|-------|----------|-----|------------|-------------|
| SPIRE1        | 6.65E-36 | 0.410119359 | 0.347 | 0.241 | 1.60E-31 | 1.1 | SPIRE1     | 1.439834025 |
| ARHGEF7       | 6.70E-36 | 0.413172414 | 0.217 | 0.129 | 1.62E-31 | 1.1 | ARHGEF7    | 1.682170543 |
| RTN4          | 6.77E-36 | 0.38882655  | 0.711 | 0.647 | 1.63E-31 | 1.1 | RTN4       | 1.098918083 |
| KRT19         | 9.56E-36 | 0.626833382 | 0.376 | 0.276 | 2.30E-31 | 1.1 | KRT19      | 1.362318841 |
| PRKCI         | 9.93E-36 | 0.424459258 | 0.266 | 0.17  | 2.39E-31 | 1.1 | PRKCI      | 1.564705882 |
| STX19         | 1.00E-35 | 0.144190489 | 0.049 | 0.014 | 2.42E-31 | 1.1 | STX19      | 3.5         |
| ARL4A         | 1.06E-35 | 0.386879409 | 0.194 | 0.109 | 2.55E-31 | 1.1 | ARL4A      | 1.779816514 |
| TBCA          | 1.28E-35 | 0.327497034 | 0.627 | 0.533 | 3.09E-31 | 1.1 | TBCA       | 1.176360225 |
| NDUFS4        | 1.86E-35 | 0.402994478 | 0.494 | 0.402 | 4.50E-31 | 1.1 | NDUFS4     | 1.228855721 |
| SLC16A13      | 2.23E-35 | 0.524248    | 0.076 | 0.028 | 5.38E-31 | 1.1 | SLC16A13   | 2.714285714 |
| GPRC5A        | 2.50E-35 | 0.766468958 | 0.46  | 0.383 | 6.02E-31 | 1.1 | GPRC5A     | 1.201044386 |
| PAICS         | 2.93E-35 | 0.32601094  | 0.235 | 0.143 | 7.06E-31 | 1.1 | PAICS      | 1.643356643 |
| PHF3          | 3.38E-35 | 0.398761474 | 0.393 | 0.287 | 8.15E-31 | 1.1 | PHF3       | 1.369337979 |
| KRT7          | 3.75E-35 | 0.447238156 | 0.357 | 0.252 | 9.04E-31 | 1.1 | KRT7       | 1.416666667 |
| PABPC1        | 6.65E-35 | 0.309755761 | 0.747 | 0.728 | 1.60E-30 | 1.1 | PABPC1     | 1.026098901 |
| PID1          | 7.36E-35 | 0.40197907  | 0.138 | 0.069 | 1.77E-30 | 1.1 | PID1       | 2           |
| CLCA4         | 1.45E-34 | 0.25652319  | 0.047 | 0.013 | 3.49E-30 | 1.1 | CLCA4      | 3.615384615 |
| RP11-795H16.3 | 1.69E-34 | 0.546790657 | 0.448 | 0.351 | 4.06E-30 | 1.1 | RP11-795H  | 1.276353276 |
| RAI14         | 2.00E-34 | 0.481879119 | 0.253 | 0.161 | 4.82E-30 | 1.1 | RAI14      | 1.571428571 |
| TPRKB         | 2.34E-34 | 0.373330362 | 0.24  | 0.149 | 5.65E-30 | 1.1 | TPRKB      | 1.610738255 |
| MTRNR2L12     | 2.63E-34 | 0.385013514 | 0.315 | 0.213 | 6.34E-30 | 1.1 | MTRNR2L1   | 1.478873239 |
| ITGB1         | 2.67E-34 | 0.551370771 | 0.416 | 0.327 | 6.44E-30 | 1.1 | ITGB1      | 1.272171254 |
| RFC1          | 2.80E-34 | 0.376753505 | 0.283 | 0.188 | 6.74E-30 | 1.1 | RFC1       | 1.505319149 |
| NFIL3         | 3.03E-34 | 0.377317235 | 0.275 | 0.179 | 7.30E-30 | 1.1 | NFIL3      | 1.536312849 |
| PIGP          | 3.39E-34 | 0.30660127  | 0.204 | 0.118 | 8.18E-30 | 1.1 | PIGP       | 1.728813559 |
| AP001439.2    | 5.62E-34 | 0.328826875 | 0.136 | 0.068 | 1.36E-29 | 1.1 | AP001439.2 | 2           |
| PCBP1         | 7.67E-34 | 0.422979681 | 0.56  | 0.499 | 1.85E-29 | 1.1 | PCBP1      | 1.122244489 |
| RPL15         | 8.40E-34 | 0.346117968 | 0.789 | 0.777 | 2.03E-29 | 1.1 | RPL15      | 1.015444015 |
| RP11-317G6.1  | 1.15E-33 | 0.230628855 | 0.076 | 0.029 | 2.78E-29 | 1.1 | RP11-317G  | 2.620689655 |
| RPL36AL       | 1.16E-33 | 0.226305479 | 0.912 | 0.883 | 2.81E-29 | 1.1 | RPL36AL    | 1.032842582 |
| ZNF143        | 1.29E-33 | 0.360861441 | 0.237 | 0.147 | 3.11E-29 | 1.1 | ZNF143     | 1.612244898 |
| TIMM10        | 1.33E-33 | 0.355207765 | 0.281 | 0.185 | 3.20E-29 | 1.1 | TIMM10     | 1.518918919 |
| ANKRD37       | 1.56E-33 | 0.275469113 | 0.12  | 0.057 | 3.75E-29 | 1.1 | ANKRD37    | 2.105263158 |
| COX7B         | 1.59E-33 | 0.341257913 | 0.682 | 0.628 | 3.84E-29 | 1.1 | COX7B      | 1.085987261 |
| LIAS          | 2.12E-33 | 0.246130427 | 0.089 | 0.037 | 5.10E-29 | 1.1 | LIAS       | 2.405405405 |
| MORC3         | 3.32E-33 | 0.406710068 | 0.328 | 0.23  | 8.02E-29 | 1.1 | MORC3      | 1.426086957 |
| LMBRD1        | 4.30E-33 | 0.374144109 | 0.305 | 0.207 | 1.04E-28 | 1.1 | LMBRD1     | 1.473429952 |
| RBFOX2        | 5.18E-33 | 0.363517061 | 0.978 | 0.948 | 1.25E-28 | 1.1 | RBFOX2     | 1.03164557  |
| CAMK2D        | 7.07E-33 | 0.512922777 | 0.254 | 0.164 | 1.71E-28 | 1.1 | CAMK2D     | 1.548780488 |
| TMEM57        | 8.18E-33 | 0.392050873 | 0.24  | 0.151 | 1.97E-28 | 1.1 | TMEM57     | 1.589403974 |
| ERGIC3        | 8.20E-33 | 0.445625772 | 0.404 | 0.316 | 1.98E-28 | 1.1 | ERGIC3     | 1.278481013 |
| CTGF          | 9.49E-33 | 0.332705447 | 0.058 | 0.019 | 2.29E-28 | 1.1 | CTGF       | 3.052631579 |
| NEDD4L        | 1.14E-32 | 0.247405551 | 0.692 | 0.588 | 2.75E-28 | 1.1 | NEDD4L     | 1.176870748 |
| PPIA          | 1.34E-32 | 0.282708393 | 0.823 | 0.803 | 3.22E-28 | 1.1 | PPIA       | 1.0249066   |
| RCAN1         | 1.87E-32 | 0.234195643 | 0.51  | 0.382 | 4.51E-28 | 1.1 | RCAN1      | 1.335078534 |
| HIST1H4C      | 2.18E-32 | 0.440627923 | 0.246 | 0.158 | 5.25E-28 | 1.1 | HIST1H4C   | 1.556962025 |
| DCTN6         | 2.20E-32 | 0.408695593 | 0.364 | 0.268 | 5.30E-28 | 1.1 | DCTN6      | 1.358208955 |
| PVT1          | 2.20E-32 | 0.431169769 | 0.43  | 0.335 | 5.31E-28 | 1.1 | PVT1       | 1.28358209  |
| WBP5          | 3.39E-32 | 0.423046323 | 0.42  | 0.322 | 8.17E-28 | 1.1 | WBP5       | 1.304347826 |
| TMEM126A      | 4.36E-32 | 0.275672444 | 0.164 | 0.09  | 1.05E-27 | 1.1 | TMEM126A   | 1.822222222 |
| NONO          | 8.94E-32 | 0.36422657  | 0.401 | 0.304 | 2.16E-27 | 1.1 | NONO       | 1.319078947 |
| C16orf72      | 1.18E-31 | 0.332137259 | 0.218 | 0.133 | 2.85E-27 | 1.1 | C16orf72   | 1.639097744 |

|            |          |             |       |       |          |     |           |             |
|------------|----------|-------------|-------|-------|----------|-----|-----------|-------------|
| MCTS1      | 1.27E-31 | 0.361937844 | 0.298 | 0.206 | 3.06E-27 | 1.1 | MCTS1     | 1.446601942 |
| NOD2       | 2.12E-31 | 0.207969188 | 0.085 | 0.035 | 5.12E-27 | 1.1 | NOD2      | 2.428571429 |
| RABGGTB    | 3.10E-31 | 0.3009941   | 0.135 | 0.069 | 7.47E-27 | 1.1 | RABGGTB   | 1.956521739 |
| SEL1L      | 6.25E-31 | 0.36632849  | 0.167 | 0.094 | 1.51E-26 | 1.1 | SEL1L     | 1.776595745 |
| RPS18      | 8.74E-31 | 0.374881691 | 0.694 | 0.629 | 2.11E-26 | 1.1 | RPS18     | 1.103338633 |
| TPM4       | 9.13E-31 | 0.358907494 | 0.459 | 0.363 | 2.20E-26 | 1.1 | TPM4      | 1.26446281  |
| FAM126B    | 1.13E-30 | 0.411924621 | 0.206 | 0.126 | 2.72E-26 | 1.1 | FAM126B   | 1.634920635 |
| AC009313.1 | 1.18E-30 | 0.318679027 | 0.116 | 0.057 | 2.85E-26 | 1.1 | AC009313. | 2.035087719 |
| RTCB       | 1.48E-30 | 0.421547639 | 0.482 | 0.4   | 3.57E-26 | 1.1 | RTCB      | 1.205       |
| LALBA      | 1.75E-30 | 0.77672953  | 0.023 | 0.004 | 4.21E-26 | 1.1 | LALBA     | 5.75        |
| METAP1     | 2.13E-30 | 0.260547256 | 0.115 | 0.056 | 5.13E-26 | 1.1 | METAP1    | 2.053571429 |
| OXSRI      | 4.52E-30 | 0.397857904 | 0.332 | 0.237 | 1.09E-25 | 1.1 | OXSRI     | 1.400843882 |
| GPM6B      | 5.88E-30 | 0.413665301 | 0.194 | 0.116 | 1.42E-25 | 1.1 | GPM6B     | 1.672413793 |
| MDH1       | 6.18E-30 | 0.379617562 | 0.358 | 0.266 | 1.49E-25 | 1.1 | MDH1      | 1.345864662 |
| CSRP1      | 9.08E-30 | 0.299862647 | 0.196 | 0.117 | 2.19E-25 | 1.1 | CSRP1     | 1.675213675 |
| TFCP2L1    | 1.33E-29 | 0.48068853  | 0.152 | 0.084 | 3.20E-25 | 1.1 | TFCP2L1   | 1.80952381  |
| POLR1D     | 1.39E-29 | 0.33538841  | 0.309 | 0.215 | 3.35E-25 | 1.1 | POLR1D    | 1.437209302 |
| AC026202.3 | 1.59E-29 | 0.434435798 | 0.286 | 0.198 | 3.84E-25 | 1.1 | AC026202. | 1.444444444 |
| RNF150     | 2.93E-29 | 0.36434206  | 0.124 | 0.063 | 7.07E-25 | 1.1 | RNF150    | 1.968253968 |
| RCC1       | 3.00E-29 | 0.445217279 | 0.351 | 0.264 | 7.24E-25 | 1.1 | RCC1      | 1.329545455 |
| TPD52      | 3.75E-29 | 0.345217319 | 0.199 | 0.121 | 9.03E-25 | 1.1 | TPD52     | 1.644628099 |
| TAGAP      | 4.90E-29 | 0.15488162  | 0.037 | 0.01  | 1.18E-24 | 1.1 | TAGAP     | 3.7         |
| BRIX1      | 5.15E-29 | 0.359709953 | 0.175 | 0.102 | 1.24E-24 | 1.1 | BRIX1     | 1.715686275 |
| KLK7       | 5.36E-29 | 0.172556359 | 0.046 | 0.014 | 1.29E-24 | 1.1 | KLK7      | 3.285714286 |
| RDX        | 5.67E-29 | 0.394134228 | 0.229 | 0.148 | 1.37E-24 | 1.1 | RDX       | 1.547297297 |
| PIP5K1A    | 5.81E-29 | 0.391857599 | 0.385 | 0.293 | 1.40E-24 | 1.1 | PIP5K1A   | 1.313993174 |
| TSLP       | 6.79E-29 | 0.245397684 | 0.079 | 0.033 | 1.64E-24 | 1.1 | TSLP      | 2.393939394 |
| AC072062.1 | 7.28E-29 | 0.38024129  | 0.548 | 0.464 | 1.76E-24 | 1.1 | AC072062. | 1.181034483 |
| HNRNPA1L2  | 7.32E-29 | 0.171924738 | 0.085 | 0.036 | 1.77E-24 | 1.1 | HNRNPA1L  | 2.361111111 |
| RBPMS      | 8.27E-29 | 0.375020485 | 0.715 | 0.653 | 1.99E-24 | 1.1 | RBPMS     | 1.094946401 |
| MXD1       | 1.01E-28 | 0.348199072 | 0.298 | 0.202 | 2.43E-24 | 1.1 | MXD1      | 1.475247525 |
| MAGI1      | 1.19E-28 | 0.374141857 | 0.783 | 0.75  | 2.86E-24 | 1.1 | MAGI1     | 1.044       |
| DYRK2      | 2.46E-28 | 0.153610799 | 0.06  | 0.022 | 5.92E-24 | 1.1 | DYRK2     | 2.727272727 |
| FABP3      | 2.57E-28 | 0.357884203 | 0.035 | 0.009 | 6.19E-24 | 1.1 | FABP3     | 3.888888889 |
| ANXA2      | 2.71E-28 | 0.291838778 | 0.93  | 0.927 | 6.53E-24 | 1.1 | ANXA2     | 1.003236246 |
| GPAT3      | 2.87E-28 | 0.264959504 | 0.092 | 0.041 | 6.91E-24 | 1.1 | GPAT3     | 2.243902439 |
| AC090498.1 | 3.38E-28 | 0.380191072 | 0.384 | 0.298 | 8.16E-24 | 1.1 | AC090498. | 1.288590604 |
| HINT1      | 4.89E-28 | 0.420229835 | 0.627 | 0.599 | 1.18E-23 | 1.1 | HINT1     | 1.046744574 |
| MEF2A      | 6.67E-28 | 0.487428067 | 0.488 | 0.415 | 1.61E-23 | 1.1 | MEF2A     | 1.175903614 |
| CCNY       | 7.35E-28 | 0.710438669 | 0.331 | 0.254 | 1.77E-23 | 1.1 | CCNY      | 1.303149606 |
| CSN3       | 8.25E-28 | 0.167724582 | 0.017 | 0.002 | 1.99E-23 | 1.1 | CSN3      | 8.5         |
| DSG3       | 1.04E-27 | 0.673004665 | 0.07  | 0.029 | 2.50E-23 | 1.1 | DSG3      | 2.413793103 |
| WEE1       | 1.22E-27 | 0.353324551 | 0.397 | 0.3   | 2.93E-23 | 1.1 | WEE1      | 1.323333333 |
| SQSTM1     | 1.42E-27 | 0.402140443 | 0.321 | 0.231 | 3.43E-23 | 1.1 | SQSTM1    | 1.38961039  |
| HPS5       | 1.58E-27 | 0.369723579 | 0.206 | 0.13  | 3.80E-23 | 1.1 | HPS5      | 1.584615385 |
| COX7C      | 2.22E-27 | 0.211703574 | 0.905 | 0.869 | 5.36E-23 | 1.1 | COX7C     | 1.041426928 |
| GJC3       | 2.55E-27 | 0.317945792 | 0.153 | 0.087 | 6.15E-23 | 1.1 | GJC3      | 1.75862069  |
| FOXC1      | 2.91E-27 | 0.195196623 | 0.077 | 0.033 | 7.03E-23 | 1.1 | FOXC1     | 2.333333333 |
| SMC5       | 6.01E-27 | 0.45323024  | 0.378 | 0.296 | 1.45E-22 | 1.1 | SMC5      | 1.277027027 |
| ADAMTS9    | 6.90E-27 | 0.161376832 | 0.304 | 0.201 | 1.66E-22 | 1.1 | ADAMTS9   | 1.512437811 |
| SLC25A33   | 1.02E-26 | 0.477355695 | 0.153 | 0.088 | 2.47E-22 | 1.1 | SLC25A33  | 1.738636364 |
| KARS       | 2.10E-26 | 0.305424219 | 0.327 | 0.237 | 5.06E-22 | 1.1 | KARS      | 1.379746835 |

|               |          |             |       |       |          |     |              |             |
|---------------|----------|-------------|-------|-------|----------|-----|--------------|-------------|
| GNG12         | 2.50E-26 | 0.432234549 | 0.4   | 0.32  | 6.03E-22 | 1.1 | GNG12        | 1.25        |
| GNA13         | 2.64E-26 | 0.37259212  | 0.286 | 0.2   | 6.36E-22 | 1.1 | GNA13        | 1.43        |
| PRKCA         | 4.19E-26 | 0.321900008 | 0.116 | 0.061 | 1.01E-21 | 1.1 | PRKCA        | 1.901639344 |
| RASAL2        | 5.77E-26 | 0.584141782 | 0.59  | 0.537 | 1.39E-21 | 1.1 | RASAL2       | 1.098696462 |
| METAP2        | 5.96E-26 | 0.335633148 | 0.324 | 0.234 | 1.44E-21 | 1.1 | METAP2       | 1.384615385 |
| YARS          | 1.21E-25 | 0.40320877  | 0.356 | 0.271 | 2.93E-21 | 1.1 | YARS         | 1.313653137 |
| PREP          | 1.24E-25 | 0.261594345 | 0.144 | 0.081 | 2.99E-21 | 1.1 | PREP         | 1.777777778 |
| EIF2S1        | 1.28E-25 | 0.351707958 | 0.272 | 0.191 | 3.09E-21 | 1.1 | EIF2S1       | 1.42408377  |
| RP11-496N12.9 | 1.57E-25 | 0.310888895 | 0.027 | 0.006 | 3.78E-21 | 1.1 | RP11-496N    | 4.5         |
| RP11-68E19.2  | 1.64E-25 | 0.224166681 | 0.094 | 0.045 | 3.95E-21 | 1.1 | RP11-68E19.2 | 2.088888889 |
| VIM           | 1.66E-25 | 0.321703792 | 0.188 | 0.117 | 4.00E-21 | 1.1 | VIM          | 1.606837607 |
| CARD16        | 2.34E-25 | 0.21918265  | 0.087 | 0.04  | 5.64E-21 | 1.1 | CARD16       | 2.175       |
| RBM39         | 2.70E-25 | 0.31733743  | 0.523 | 0.446 | 6.51E-21 | 1.1 | RBM39        | 1.17264574  |
| NAP1L1        | 3.82E-25 | 0.330984459 | 0.434 | 0.349 | 9.22E-21 | 1.1 | NAP1L1       | 1.243553009 |
| MRPL45        | 3.87E-25 | 0.287328486 | 0.213 | 0.139 | 9.33E-21 | 1.1 | MRPL45       | 1.532374101 |
| MYO9B         | 4.97E-25 | 0.401387972 | 0.258 | 0.179 | 1.20E-20 | 1.1 | MYO9B        | 1.441340782 |
| PUM3          | 4.98E-25 | 0.357946645 | 0.239 | 0.162 | 1.20E-20 | 1.1 | PUM3         | 1.475308642 |
| ARHGAP29      | 6.90E-25 | 0.674291187 | 0.605 | 0.571 | 1.66E-20 | 1.1 | ARHGAP29     | 1.059544658 |
| UFC1          | 1.14E-24 | 0.32094493  | 0.544 | 0.478 | 2.75E-20 | 1.1 | UFC1         | 1.138075314 |
| RBPJ          | 1.46E-24 | 0.361477166 | 0.422 | 0.343 | 3.52E-20 | 1.1 | RBPJ         | 1.2303207   |
| AFF4          | 1.75E-24 | 0.379151477 | 0.499 | 0.428 | 4.22E-20 | 1.1 | AFF4         | 1.16588785  |
| ATP5F1        | 1.83E-24 | 0.363446225 | 0.441 | 0.365 | 4.41E-20 | 1.1 | ATP5F1       | 1.208219178 |
| HERC3         | 1.90E-24 | 0.410340659 | 0.226 | 0.151 | 4.59E-20 | 1.1 | HERC3        | 1.496688742 |
| FAM19A2       | 1.93E-24 | 0.345459815 | 0.671 | 0.585 | 4.65E-20 | 1.1 | FAM19A2      | 1.147008547 |
| FOSB          | 2.17E-24 | 0.450180055 | 0.458 | 0.388 | 5.23E-20 | 1.1 | FOSB         | 1.180412371 |
| AMOTL1        | 2.20E-24 | 0.176204275 | 0.088 | 0.041 | 5.31E-20 | 1.1 | AMOTL1       | 2.146341463 |
| RP11-30611.2  | 2.24E-24 | 0.101206686 | 0.03  | 0.008 | 5.41E-20 | 1.1 | RP11-30611   | 3.75        |
| HSF2          | 2.52E-24 | 0.240559146 | 0.12  | 0.065 | 6.08E-20 | 1.1 | HSF2         | 1.846153846 |
| SEPP1         | 3.38E-24 | 0.441611303 | 0.378 | 0.305 | 8.14E-20 | 1.1 | SEPP1        | 1.239344262 |
| FNBP4         | 3.42E-24 | 0.371783886 | 0.471 | 0.394 | 8.25E-20 | 1.1 | FNBP4        | 1.195431472 |
| SET           | 4.50E-24 | 0.331459997 | 0.477 | 0.401 | 1.08E-19 | 1.1 | SET          | 1.189526185 |
| ZCCHC8        | 5.23E-24 | 0.303235824 | 0.183 | 0.114 | 1.26E-19 | 1.1 | ZCCHC8       | 1.605263158 |
| GNB2L1        | 5.57E-24 | 0.352035138 | 0.693 | 0.67  | 1.34E-19 | 1.1 | GNB2L1       | 1.034328358 |
| GPBP1         | 6.59E-24 | 0.235564936 | 0.725 | 0.685 | 1.59E-19 | 1.1 | GPBP1        | 1.058394161 |
| NFIX          | 7.02E-24 | 0.236611348 | 0.115 | 0.061 | 1.69E-19 | 1.1 | NFIX         | 1.885245902 |
| S100A1        | 7.15E-24 | 0.187685695 | 0.078 | 0.035 | 1.72E-19 | 1.1 | S100A1       | 2.228571429 |
| TMEM150C      | 7.98E-24 | 0.307329335 | 0.278 | 0.198 | 1.92E-19 | 1.1 | TMEM150C     | 1.404040404 |
| SPCS2         | 9.90E-24 | 0.352022592 | 0.376 | 0.294 | 2.39E-19 | 1.1 | SPCS2        | 1.278911565 |
| SARNP         | 1.01E-23 | 0.39582104  | 0.267 | 0.191 | 2.43E-19 | 1.1 | SARNP        | 1.397905759 |
| DYRK3         | 1.03E-23 | 0.237792138 | 0.087 | 0.042 | 2.48E-19 | 1.1 | DYRK3        | 2.071428571 |
| FBLIM1        | 1.05E-23 | 0.284696096 | 0.165 | 0.1   | 2.52E-19 | 1.1 | FBLIM1       | 1.65        |
| DSG2          | 1.77E-23 | 0.338131077 | 0.336 | 0.255 | 4.27E-19 | 1.1 | DSG2         | 1.317647059 |
| RP11-481C4.1  | 2.14E-23 | 0.257794812 | 0.11  | 0.057 | 5.17E-19 | 1.1 | RP11-481C    | 1.929824561 |
| VPS37B        | 2.29E-23 | 0.272219784 | 0.191 | 0.121 | 5.53E-19 | 1.1 | VPS37B       | 1.578512397 |
| RRAGD         | 2.52E-23 | 0.209994687 | 0.095 | 0.048 | 6.08E-19 | 1.1 | RRAGD        | 1.979166667 |
| HNRNPDL       | 2.76E-23 | 0.313600998 | 0.363 | 0.28  | 6.65E-19 | 1.1 | HNRNPDL      | 1.296428571 |
| DYNLL1        | 3.35E-23 | 0.353952785 | 0.32  | 0.236 | 8.07E-19 | 1.1 | DYNLL1       | 1.355932203 |
| CROCC         | 4.44E-23 | 0.232448985 | 0.1   | 0.051 | 1.07E-18 | 1.1 | CROCC        | 1.960784314 |
| COX7A2L       | 5.07E-23 | 0.309593644 | 0.562 | 0.491 | 1.22E-18 | 1.1 | COX7A2L      | 1.144602851 |
| SEC11A        | 5.35E-23 | 0.303890602 | 0.546 | 0.476 | 1.29E-18 | 1.1 | SEC11A       | 1.147058824 |
| FOXJ3         | 9.32E-23 | 0.398020156 | 0.335 | 0.258 | 2.25E-18 | 1.1 | FOXJ3        | 1.298449612 |
| RNF19A        | 9.35E-23 | 0.438079461 | 0.619 | 0.569 | 2.26E-18 | 1.1 | RNF19A       | 1.087873462 |

|               |          |             |       |       |          |     |            |             |
|---------------|----------|-------------|-------|-------|----------|-----|------------|-------------|
| PNN           | 9.57E-23 | 0.363494012 | 0.391 | 0.315 | 2.31E-18 | 1.1 | PNN        | 1.241269841 |
| COMMD6        | 1.20E-22 | 0.338831496 | 0.423 | 0.347 | 2.88E-18 | 1.1 | COMMD6     | 1.219020173 |
| CHD6          | 1.84E-22 | 0.393268029 | 0.35  | 0.275 | 4.44E-18 | 1.1 | CHD6       | 1.272727273 |
| TMEM27        | 2.78E-22 | 0.178678919 | 0.055 | 0.022 | 6.71E-18 | 1.1 | TMEM27     | 2.5         |
| ARHGAP26-AS1  | 4.20E-22 | 0.378362565 | 0.208 | 0.14  | 1.01E-17 | 1.1 | ARHGAP26   | 1.485714286 |
| HNRNPD        | 4.22E-22 | 0.32691775  | 0.354 | 0.275 | 1.02E-17 | 1.1 | HNRNPD     | 1.287272727 |
| SH3RF1        | 4.86E-22 | 0.380544829 | 0.295 | 0.217 | 1.17E-17 | 1.1 | SH3RF1     | 1.359447005 |
| SF3B6         | 5.15E-22 | 0.269959043 | 0.649 | 0.604 | 1.24E-17 | 1.1 | SF3B6      | 1.074503311 |
| EIF2S3        | 5.58E-22 | 0.324738338 | 0.364 | 0.284 | 1.35E-17 | 1.1 | EIF2S3     | 1.281690141 |
| NUDT2         | 6.47E-22 | 0.25080481  | 0.184 | 0.118 | 1.56E-17 | 1.1 | NUDT2      | 1.559322034 |
| AC004878.2    | 7.54E-22 | 0.141660738 | 0.046 | 0.017 | 1.82E-17 | 1.1 | AC004878.  | 2.705882353 |
| POLR1E        | 9.91E-22 | 0.134489298 | 0.054 | 0.021 | 2.39E-17 | 1.1 | POLR1E     | 2.571428571 |
| TMEM263       | 1.19E-21 | 0.230608808 | 0.145 | 0.086 | 2.86E-17 | 1.1 | TMEM263    | 1.686046512 |
| ATG14         | 1.49E-21 | 0.267069242 | 0.155 | 0.095 | 3.60E-17 | 1.1 | ATG14      | 1.631578947 |
| RASSF3        | 1.82E-21 | 0.281219268 | 0.181 | 0.115 | 4.38E-17 | 1.1 | RASSF3     | 1.573913043 |
| LINC01492     | 1.90E-21 | 0.196640168 | 0.132 | 0.076 | 4.58E-17 | 1.1 | LINC01492  | 1.736842105 |
| ITGA2         | 2.09E-21 | 0.495124731 | 0.453 | 0.382 | 5.04E-17 | 1.1 | ITGA2      | 1.185863874 |
| KHDRBS1       | 2.27E-21 | 0.309890601 | 0.36  | 0.283 | 5.48E-17 | 1.1 | KHDRBS1    | 1.272084806 |
| SLC6A14       | 3.45E-21 | 0.303490766 | 0.16  | 0.099 | 8.31E-17 | 1.1 | SLC6A14    | 1.616161616 |
| PDIA3         | 3.72E-21 | 0.367439676 | 0.378 | 0.299 | 8.98E-17 | 1.1 | PDIA3      | 1.264214047 |
| EIF3D         | 4.50E-21 | 0.330080135 | 0.393 | 0.32  | 1.09E-16 | 1.1 | EIF3D      | 1.228125    |
| AK2           | 6.28E-21 | 0.256168998 | 0.17  | 0.107 | 1.52E-16 | 1.1 | AK2        | 1.588785047 |
| MAP1B         | 9.88E-21 | 0.263715842 | 0.346 | 0.259 | 2.38E-16 | 1.1 | MAP1B      | 1.335907336 |
| MGAT5         | 1.04E-20 | 0.37679059  | 0.329 | 0.257 | 2.50E-16 | 1.1 | MGAT5      | 1.280155642 |
| MAP2          | 1.20E-20 | 0.35638797  | 0.148 | 0.091 | 2.89E-16 | 1.1 | MAP2       | 1.626373626 |
| MID1          | 1.61E-20 | 0.249995071 | 0.108 | 0.059 | 3.87E-16 | 1.1 | MID1       | 1.830508475 |
| MPZL1         | 1.65E-20 | 0.429030728 | 0.431 | 0.368 | 3.98E-16 | 1.1 | MPZL1      | 1.171195652 |
| MORF4L1       | 1.74E-20 | 0.246848459 | 0.679 | 0.625 | 4.19E-16 | 1.1 | MORF4L1    | 1.0864      |
| CYLD          | 1.88E-20 | 0.382501061 | 0.28  | 0.205 | 4.52E-16 | 1.1 | CYLD       | 1.365853659 |
| INTS6-AS1     | 1.94E-20 | 0.241824464 | 0.178 | 0.116 | 4.67E-16 | 1.1 | INTS6-AS1  | 1.534482759 |
| NUS1          | 2.10E-20 | 0.260002453 | 0.129 | 0.076 | 5.07E-16 | 1.1 | NUS1       | 1.697368421 |
| RPS2          | 2.53E-20 | 0.297033667 | 0.346 | 0.266 | 6.10E-16 | 1.1 | RPS2       | 1.30075188  |
| RP11-443B7.1  | 2.64E-20 | 0.107965497 | 0.047 | 0.018 | 6.36E-16 | 1.1 | RP11-443B  | 2.611111111 |
| SLC25A37      | 2.72E-20 | 0.267250165 | 0.474 | 0.374 | 6.55E-16 | 1.1 | SLC25A37   | 1.267379679 |
| CHSY1         | 2.91E-20 | 0.212432732 | 0.146 | 0.088 | 7.02E-16 | 1.1 | CHSY1      | 1.659090909 |
| GTF2F2        | 3.05E-20 | 0.245083491 | 0.157 | 0.098 | 7.35E-16 | 1.1 | GTF2F2     | 1.602040816 |
| TCF7L2        | 4.29E-20 | 0.424027899 | 0.441 | 0.376 | 1.03E-15 | 1.1 | TCF7L2     | 1.17287234  |
| ZC3H15        | 4.49E-20 | 0.309947895 | 0.301 | 0.228 | 1.08E-15 | 1.1 | ZC3H15     | 1.320175439 |
| RP11-840I19.3 | 6.05E-20 | 0.239697367 | 0.103 | 0.056 | 1.46E-15 | 1.1 | RP11-840I1 | 1.839285714 |
| CLEC2B        | 7.35E-20 | 0.330234857 | 0.106 | 0.059 | 1.77E-15 | 1.1 | CLEC2B     | 1.796610169 |
| CENPU         | 8.66E-20 | 0.116889612 | 0.036 | 0.012 | 2.09E-15 | 1.1 | CENPU      | 3           |
| INTS12        | 8.71E-20 | 0.341038206 | 0.274 | 0.203 | 2.10E-15 | 1.1 | INTS12     | 1.349753695 |
| RP11-817J15.3 | 1.05E-19 | 0.106997218 | 0.034 | 0.011 | 2.54E-15 | 1.1 | RP11-817J1 | 3.090909091 |
| CA5B          | 1.10E-19 | 0.289135319 | 0.181 | 0.119 | 2.66E-15 | 1.1 | CA5B       | 1.521008403 |
| CNN3          | 1.34E-19 | 0.389453072 | 0.557 | 0.511 | 3.22E-15 | 1.1 | CNN3       | 1.090019569 |
| IPO5          | 2.16E-19 | 0.261185994 | 0.158 | 0.101 | 5.21E-15 | 1.1 | IPO5       | 1.564356436 |
| ATP11B        | 2.17E-19 | 0.343149396 | 0.21  | 0.146 | 5.24E-15 | 1.1 | ATP11B     | 1.438356164 |
| WDR48         | 2.33E-19 | 0.300386381 | 0.251 | 0.182 | 5.61E-15 | 1.1 | WDR48      | 1.379120879 |
| RP11-356C4.5  | 2.40E-19 | 0.448159205 | 0.203 | 0.143 | 5.78E-15 | 1.1 | RP11-356C  | 1.41958042  |
| GSTO2         | 3.49E-19 | 0.210685843 | 0.147 | 0.09  | 8.41E-15 | 1.1 | GSTO2      | 1.633333333 |
| SNHG12        | 3.49E-19 | 0.194096406 | 0.08  | 0.04  | 8.42E-15 | 1.1 | SNHG12     | 2           |
| TMEM258       | 3.66E-19 | 0.228559018 | 0.649 | 0.593 | 8.82E-15 | 1.1 | TMEM258    | 1.094435076 |

|                |          |             |       |       |          |     |           |             |
|----------------|----------|-------------|-------|-------|----------|-----|-----------|-------------|
| MT-CO3         | 3.86E-19 | 0.174554921 | 0.998 | 0.995 | 9.31E-15 | 1.1 | MT-CO3    | 1.003015075 |
| KIF13B         | 5.43E-19 | 0.45729419  | 0.314 | 0.251 | 1.31E-14 | 1.1 | KIF13B    | 1.250996016 |
| CPA4           | 6.15E-19 | 0.101143338 | 0.024 | 0.006 | 1.48E-14 | 1.1 | CPA4      | 4           |
| WDR43          | 8.41E-19 | 0.253621328 | 0.159 | 0.101 | 2.03E-14 | 1.1 | WDR43     | 1.574257426 |
| RP11-314N13.10 | 9.15E-19 | 0.402317356 | 0.17  | 0.112 | 2.21E-14 | 1.1 | RP11-314N | 1.517857143 |
| CSN1S1         | 9.83E-19 | 0.435818396 | 0.009 | 0.001 | 2.37E-14 | 1.1 | CSN1S1    | 9           |
| PCNXL2         | 1.53E-18 | 0.352898681 | 0.812 | 0.758 | 3.69E-14 | 1.1 | PCNXL2    | 1.071240106 |
| SDK2           | 1.71E-18 | 0.236148372 | 0.101 | 0.056 | 4.12E-14 | 1.1 | SDK2      | 1.803571429 |
| TCEAL8         | 1.73E-18 | 0.27655208  | 0.297 | 0.226 | 4.16E-14 | 1.1 | TCEAL8    | 1.314159292 |
| EEPD1          | 1.89E-18 | 0.165837789 | 0.086 | 0.045 | 4.57E-14 | 1.1 | EEPD1     | 1.911111111 |
| WBP4           | 1.90E-18 | 0.246863216 | 0.146 | 0.092 | 4.59E-14 | 1.1 | WBP4      | 1.586956522 |
| PIAS2          | 1.99E-18 | 0.228673573 | 0.115 | 0.067 | 4.79E-14 | 1.1 | PIAS2     | 1.71641791  |
| DPH5           | 5.51E-18 | 0.163939824 | 0.096 | 0.053 | 1.33E-13 | 1.1 | DPH5      | 1.811320755 |
| FBXO42         | 5.60E-18 | 0.331306005 | 0.222 | 0.159 | 1.35E-13 | 1.1 | FBXO42    | 1.396226415 |
| BEX5           | 6.45E-18 | 0.136903546 | 0.055 | 0.024 | 1.56E-13 | 1.1 | BEX5      | 2.291666667 |
| EIF3I          | 8.39E-18 | 0.230095802 | 0.635 | 0.59  | 2.02E-13 | 1.1 | EIF3I     | 1.076271186 |
| SPAG9          | 1.67E-17 | 0.357156502 | 0.403 | 0.339 | 4.02E-13 | 1.1 | SPAG9     | 1.18879056  |
| RP1-117O3.2    | 1.84E-17 | 0.184725684 | 0.067 | 0.033 | 4.43E-13 | 1.1 | RP1-117O3 | 2.03030303  |
| RP11-557C18.3  | 2.19E-17 | 0.239922242 | 0.084 | 0.045 | 5.28E-13 | 1.1 | RP11-557C | 1.866666667 |
| ARF6           | 2.26E-17 | 0.323645092 | 0.265 | 0.198 | 5.46E-13 | 1.1 | ARF6      | 1.338383838 |
| SEMA3B         | 2.32E-17 | 0.134319993 | 0.045 | 0.018 | 5.60E-13 | 1.1 | SEMA3B    | 2.5         |
| OSTC           | 2.35E-17 | 0.266844003 | 0.512 | 0.452 | 5.66E-13 | 1.1 | OSTC      | 1.132743363 |
| SPHKAP         | 3.12E-17 | 0.12156897  | 0.047 | 0.02  | 7.53E-13 | 1.1 | SPHKAP    | 2.35        |
| LARS           | 3.24E-17 | 0.285215949 | 0.256 | 0.19  | 7.81E-13 | 1.1 | LARS      | 1.347368421 |
| RAB8B          | 4.34E-17 | 0.32515612  | 0.2   | 0.141 | 1.05E-12 | 1.1 | RAB8B     | 1.418439716 |
| ENO1           | 5.26E-17 | 0.195122173 | 0.445 | 0.375 | 1.27E-12 | 1.1 | ENO1      | 1.186666667 |
| PREPL          | 5.43E-17 | 0.224446863 | 0.155 | 0.1   | 1.31E-12 | 1.1 | PREPL     | 1.55        |
| AFAP1          | 5.89E-17 | 0.20068407  | 0.132 | 0.082 | 1.42E-12 | 1.1 | AFAP1     | 1.609756098 |
| PLEKHH2        | 8.52E-17 | 0.195246176 | 0.106 | 0.062 | 2.05E-12 | 1.1 | PLEKHH2   | 1.709677419 |
| SYNE1          | 9.73E-17 | 0.180189458 | 0.05  | 0.022 | 2.35E-12 | 1.1 | SYNE1     | 2.272727273 |
| VAPA           | 1.10E-16 | 0.276918815 | 0.521 | 0.469 | 2.66E-12 | 1.1 | VAPA      | 1.1108742   |
| TRA2A          | 1.21E-16 | 0.308450232 | 0.455 | 0.396 | 2.92E-12 | 1.1 | TRA2A     | 1.148989899 |
| CCDC82         | 1.26E-16 | 0.305208899 | 0.209 | 0.15  | 3.04E-12 | 1.1 | CCDC82    | 1.393333333 |
| TMEM99         | 1.35E-16 | 0.193144881 | 0.118 | 0.071 | 3.25E-12 | 1.1 | TMEM99    | 1.661971831 |
| LINC00866      | 1.72E-16 | 0.267337512 | 0.038 | 0.015 | 4.14E-12 | 1.1 | LINC00866 | 2.533333333 |
| HOTAIRM1       | 1.90E-16 | 0.128925591 | 0.064 | 0.031 | 4.58E-12 | 1.1 | HOTAIRM1  | 2.064516129 |
| VPS29          | 1.90E-16 | 0.303181593 | 0.381 | 0.314 | 4.59E-12 | 1.1 | VPS29     | 1.213375796 |
| ARHGDI8        | 2.01E-16 | 0.327945025 | 0.208 | 0.15  | 4.84E-12 | 1.1 | ARHGDI8   | 1.386666667 |
| HERPUD1        | 3.20E-16 | 0.299865496 | 0.284 | 0.217 | 7.71E-12 | 1.1 | HERPUD1   | 1.30875576  |
| TCP1           | 3.45E-16 | 0.298803114 | 0.222 | 0.162 | 8.32E-12 | 1.1 | TCP1      | 1.37037037  |
| CDK6           | 3.72E-16 | 0.277941483 | 0.18  | 0.124 | 8.96E-12 | 1.1 | CDK6      | 1.451612903 |
| ATP5G1         | 3.81E-16 | 0.269540912 | 0.239 | 0.177 | 9.20E-12 | 1.1 | ATP5G1    | 1.350282486 |
| DAPK3          | 4.13E-16 | 0.18285671  | 0.091 | 0.051 | 9.96E-12 | 1.1 | DAPK3     | 1.784313725 |
| UBE3A          | 4.16E-16 | 0.340858754 | 0.357 | 0.294 | 1.00E-11 | 1.1 | UBE3A     | 1.214285714 |
| ZMYM5          | 4.27E-16 | 0.279308557 | 0.201 | 0.143 | 1.03E-11 | 1.1 | ZMYM5     | 1.405594406 |
| PRDM2          | 4.43E-16 | 0.195629752 | 0.358 | 0.29  | 1.07E-11 | 1.1 | PRDM2     | 1.234482759 |
| NF2            | 5.39E-16 | 0.200160907 | 0.104 | 0.061 | 1.30E-11 | 1.1 | NF2       | 1.704918033 |
| OAT            | 5.82E-16 | 0.364811595 | 0.332 | 0.271 | 1.40E-11 | 1.1 | OAT       | 1.225092251 |
| TOP2B          | 6.47E-16 | 0.253447728 | 0.251 | 0.186 | 1.56E-11 | 1.1 | TOP2B     | 1.349462366 |
| YWHAE          | 7.85E-16 | 0.257665237 | 0.652 | 0.626 | 1.89E-11 | 1.1 | YWHAE     | 1.041533546 |
| MFSD14A        | 7.92E-16 | 0.258595232 | 0.176 | 0.122 | 1.91E-11 | 1.1 | MFSD14A   | 1.442622951 |
| SEC63          | 1.17E-15 | 0.2905004   | 0.281 | 0.218 | 2.81E-11 | 1.1 | SEC63     | 1.288990826 |

|              |          |             |       |       |          |     |            |             |
|--------------|----------|-------------|-------|-------|----------|-----|------------|-------------|
| RP11-299J3.8 | 1.42E-15 | 0.155077795 | 0.079 | 0.042 | 3.42E-11 | 1.1 | RP11-299J3 | 1.880952381 |
| CTTNBP2NL    | 1.44E-15 | 0.330989891 | 0.264 | 0.204 | 3.48E-11 | 1.1 | CTTNBP2NL  | 1.294117647 |
| ANP32B       | 1.58E-15 | 0.229089786 | 0.203 | 0.144 | 3.81E-11 | 1.1 | ANP32B     | 1.409722222 |
| ACTR3        | 1.69E-15 | 0.30352562  | 0.326 | 0.265 | 4.06E-11 | 1.1 | ACTR3      | 1.230188679 |
| MRPL22       | 1.91E-15 | 0.273179781 | 0.271 | 0.21  | 4.60E-11 | 1.1 | MRPL22     | 1.29047619  |
| MIR4435-2HG  | 1.98E-15 | 0.345866972 | 0.544 | 0.499 | 4.78E-11 | 1.1 | MIR4435-2  | 1.090180361 |
| CKS1B        | 5.19E-15 | 0.266798899 | 0.368 | 0.308 | 1.25E-10 | 1.1 | CKS1B      | 1.194805195 |
| RP11-307P5.1 | 5.48E-15 | 0.112517349 | 0.044 | 0.019 | 1.32E-10 | 1.1 | RP11-307P5 | 2.315789474 |
| CCDC59       | 6.77E-15 | 0.208480509 | 0.244 | 0.181 | 1.63E-10 | 1.1 | CCDC59     | 1.348066298 |
| MEF2C        | 6.83E-15 | 0.117462294 | 0.036 | 0.014 | 1.65E-10 | 1.1 | MEF2C      | 2.571428571 |
| LINC00486    | 7.08E-15 | 0.117746631 | 0.988 | 0.987 | 1.71E-10 | 1.1 | LINC00486  | 1.001013171 |
| MBIP         | 7.38E-15 | 0.236544198 | 0.208 | 0.151 | 1.78E-10 | 1.1 | MBIP       | 1.377483444 |
| RAP2B        | 8.85E-15 | 0.327197483 | 0.232 | 0.175 | 2.13E-10 | 1.1 | RAP2B      | 1.325714286 |
| CLIC4        | 9.31E-15 | 0.268080013 | 0.598 | 0.557 | 2.24E-10 | 1.1 | CLIC4      | 1.073608618 |
| HSPA9        | 9.94E-15 | 0.268423285 | 0.272 | 0.211 | 2.40E-10 | 1.1 | HSPA9      | 1.289099526 |
| AC074289.1   | 1.07E-14 | 0.110228184 | 0.044 | 0.019 | 2.58E-10 | 1.1 | AC074289   | 2.315789474 |
| MCF2L2       | 1.26E-14 | 0.262926964 | 0.143 | 0.095 | 3.03E-10 | 1.1 | MCF2L2     | 1.505263158 |
| LATS2        | 1.28E-14 | 0.213900498 | 0.157 | 0.106 | 3.09E-10 | 1.1 | LATS2      | 1.481132075 |
| LYRM4        | 1.36E-14 | 0.224952692 | 0.189 | 0.134 | 3.27E-10 | 1.1 | LYRM4      | 1.410447761 |
| SAR1A        | 1.38E-14 | 0.259110663 | 0.243 | 0.184 | 3.33E-10 | 1.1 | SAR1A      | 1.320652174 |
| SARS         | 1.40E-14 | 0.239178188 | 0.228 | 0.171 | 3.37E-10 | 1.1 | SARS       | 1.333333333 |
| RAPGEF1      | 2.46E-14 | 0.215702934 | 0.145 | 0.097 | 5.94E-10 | 1.1 | RAPGEF1    | 1.494845361 |
| EIF1B        | 2.71E-14 | 0.27052905  | 0.277 | 0.218 | 6.54E-10 | 1.1 | EIF1B      | 1.270642202 |
| ITGB5-AS1    | 2.75E-14 | 0.314913781 | 0.049 | 0.023 | 6.63E-10 | 1.1 | ITGB5-AS1  | 2.130434783 |
| JAZF1        | 3.22E-14 | 0.184236623 | 0.128 | 0.082 | 7.75E-10 | 1.1 | JAZF1      | 1.56097561  |
| FGF2         | 3.34E-14 | 0.182824799 | 0.073 | 0.039 | 8.05E-10 | 1.1 | FGF2       | 1.871794872 |
| RPL13        | 3.69E-14 | 0.268656507 | 0.468 | 0.413 | 8.90E-10 | 1.1 | RPL13      | 1.133171913 |
| HLA-DRB1     | 3.76E-14 | 0.155613439 | 0.081 | 0.046 | 9.06E-10 | 1.1 | HLA-DRB1   | 1.760869565 |
| EXT1         | 3.85E-14 | 0.443926437 | 0.531 | 0.493 | 9.28E-10 | 1.1 | EXT1       | 1.077079108 |
| MAMLD1       | 3.98E-14 | 0.127324243 | 0.062 | 0.032 | 9.59E-10 | 1.1 | MAMLD1     | 1.9375      |
| TRAM1        | 4.01E-14 | 0.244541056 | 0.247 | 0.189 | 9.68E-10 | 1.1 | TRAM1      | 1.306878307 |
| PCGF5        | 4.54E-14 | 0.29607723  | 0.223 | 0.168 | 1.09E-09 | 1.1 | PCGF5      | 1.327380952 |
| NMB          | 6.27E-14 | 0.10950079  | 0.036 | 0.015 | 1.51E-09 | 1.1 | NMB        | 2.4         |
| CACUL1       | 6.69E-14 | 0.302026424 | 0.426 | 0.374 | 1.61E-09 | 1.1 | CACUL1     | 1.139037433 |
| ARMCX3       | 7.10E-14 | 0.202770493 | 0.174 | 0.122 | 1.71E-09 | 1.1 | ARMCX3     | 1.426229508 |
| CASP1        | 7.95E-14 | 0.14235512  | 0.055 | 0.028 | 1.92E-09 | 1.1 | CASP1      | 1.964285714 |
| DNAJB6       | 8.40E-14 | 0.354603383 | 0.428 | 0.378 | 2.03E-09 | 1.1 | DNAJB6     | 1.132275132 |
| ATP5C1       | 9.39E-14 | 0.243530947 | 0.336 | 0.279 | 2.27E-09 | 1.1 | ATP5C1     | 1.204301075 |
| DSC2         | 9.63E-14 | 0.294863165 | 0.26  | 0.203 | 2.32E-09 | 1.1 | DSC2       | 1.280788177 |
| MAPKAPK2     | 1.02E-13 | 0.210439737 | 0.196 | 0.141 | 2.46E-09 | 1.1 | MAPKAPK2   | 1.390070922 |
| INSIG2       | 1.13E-13 | 0.342959531 | 0.261 | 0.206 | 2.72E-09 | 1.1 | INSIG2     | 1.266990291 |
| GADD45A      | 1.14E-13 | 0.314822773 | 0.322 | 0.261 | 2.75E-09 | 1.1 | GADD45A    | 1.233716475 |
| KIT          | 1.14E-13 | 0.221733518 | 0.228 | 0.17  | 2.76E-09 | 1.1 | KIT        | 1.341176471 |
| FAM46B       | 1.21E-13 | 0.213617021 | 0.087 | 0.05  | 2.91E-09 | 1.1 | FAM46B     | 1.74        |
| SNX8         | 1.60E-13 | 0.230532078 | 0.081 | 0.047 | 3.85E-09 | 1.1 | SNX8       | 1.723404255 |
| UBQLN1       | 2.12E-13 | 0.237867285 | 0.295 | 0.236 | 5.11E-09 | 1.1 | UBQLN1     | 1.25        |
| SERP1        | 2.21E-13 | 0.226211418 | 0.308 | 0.248 | 5.34E-09 | 1.1 | SERP1      | 1.241935484 |
| BCL7A        | 2.45E-13 | 0.12078195  | 0.053 | 0.026 | 5.90E-09 | 1.1 | BCL7A      | 2.038461538 |
| TNFRSF10B    | 3.18E-13 | 0.283409849 | 0.257 | 0.2   | 7.68E-09 | 1.1 | TNFRSF10B  | 1.285       |
| C12orf45     | 4.13E-13 | 0.115038279 | 0.051 | 0.025 | 9.96E-09 | 1.1 | C12orf45   | 2.04        |
| PISD         | 4.24E-13 | 0.265180572 | 0.214 | 0.161 | 1.02E-08 | 1.1 | PISD       | 1.329192547 |
| NOP58        | 4.62E-13 | 0.235635129 | 0.258 | 0.2   | 1.12E-08 | 1.1 | NOP58      | 1.29        |



|              |          |             |       |       |          |     |           |             |
|--------------|----------|-------------|-------|-------|----------|-----|-----------|-------------|
| YWHAQ        | 4.89E-13 | 0.312366362 | 0.411 | 0.362 | 1.18E-08 | 1.1 | YWHAQ     | 1.135359116 |
| FAM133B      | 5.33E-13 | 0.19125484  | 0.141 | 0.096 | 1.28E-08 | 1.1 | FAM133B   | 1.46875     |
| TP53BP2      | 7.54E-13 | 0.276935336 | 0.166 | 0.119 | 1.82E-08 | 1.1 | TP53BP2   | 1.394957983 |
| AC016995.3   | 9.68E-13 | 0.16882613  | 0.169 | 0.118 | 2.33E-08 | 1.1 | AC016995. | 1.43220339  |
| ITGBL1       | 1.03E-12 | 0.131281784 | 0.048 | 0.024 | 2.49E-08 | 1.1 | ITGBL1    | 2           |
| ACSL4        | 1.08E-12 | 0.211951628 | 0.083 | 0.05  | 2.60E-08 | 1.1 | ACSL4     | 1.66        |
| RP11-84A19.4 | 1.23E-12 | 0.166619075 | 0.086 | 0.051 | 2.98E-08 | 1.1 | RP11-84A1 | 1.68627451  |
| RP11-685M7.5 | 1.36E-12 | 0.16236316  | 0.073 | 0.041 | 3.29E-08 | 1.1 | RP11-685M | 1.780487805 |
| CENPW        | 1.44E-12 | 0.241507075 | 0.106 | 0.068 | 3.48E-08 | 1.1 | CENPW     | 1.558823529 |
| EFNB2        | 1.57E-12 | 0.199852382 | 0.146 | 0.1   | 3.80E-08 | 1.1 | EFNB2     | 1.46        |
| DDX47        | 1.67E-12 | 0.201468169 | 0.059 | 0.032 | 4.03E-08 | 1.1 | DDX47     | 1.84375     |
| CDC27        | 1.89E-12 | 0.33839094  | 0.31  | 0.258 | 4.56E-08 | 1.1 | CDC27     | 1.201550388 |
| RP11-758H9.2 | 1.95E-12 | 0.126103662 | 0.035 | 0.015 | 4.71E-08 | 1.1 | RP11-758H | 2.333333333 |
| RP11-87M18.2 | 2.19E-12 | 0.124550363 | 0.079 | 0.046 | 5.29E-08 | 1.1 | RP11-87M1 | 1.717391304 |
| DAB2IP       | 2.24E-12 | 0.205062717 | 0.119 | 0.078 | 5.40E-08 | 1.1 | DAB2IP    | 1.525641026 |
| GNA12        | 2.37E-12 | 0.35509583  | 0.341 | 0.295 | 5.72E-08 | 1.1 | GNA12     | 1.155932203 |
| B3GNT5       | 2.85E-12 | 0.181320252 | 0.088 | 0.054 | 6.87E-08 | 1.1 | B3GNT5    | 1.62962963  |
| MIER1        | 3.19E-12 | 0.295028745 | 0.218 | 0.168 | 7.69E-08 | 1.1 | MIER1     | 1.297619048 |
| PKIG         | 3.31E-12 | 0.15243382  | 0.082 | 0.049 | 7.99E-08 | 1.1 | PKIG      | 1.673469388 |
| CD2AP        | 3.32E-12 | 0.362560662 | 0.466 | 0.425 | 8.00E-08 | 1.1 | CD2AP     | 1.096470588 |
| SSBP2        | 3.65E-12 | 0.361876734 | 0.481 | 0.432 | 8.79E-08 | 1.1 | SSBP2     | 1.113425926 |
| HOXA3        | 3.81E-12 | 0.102388174 | 0.044 | 0.021 | 9.19E-08 | 1.1 | HOXA3     | 2.095238095 |
| MORN2        | 4.26E-12 | 0.129896701 | 0.095 | 0.058 | 1.03E-07 | 1.1 | MORN2     | 1.637931034 |
| LHFPL3       | 4.45E-12 | 0.241589465 | 0.309 | 0.255 | 1.07E-07 | 1.1 | LHFPL3    | 1.211764706 |
| RIC3         | 4.56E-12 | 0.455500328 | 0.086 | 0.054 | 1.10E-07 | 1.1 | RIC3      | 1.592592593 |
| ITGA6        | 4.59E-12 | 0.188798331 | 0.118 | 0.077 | 1.11E-07 | 1.1 | ITGA6     | 1.532467532 |
| ASUN         | 5.03E-12 | 0.123406553 | 0.062 | 0.034 | 1.21E-07 | 1.1 | ASUN      | 1.823529412 |
| CDC5L        | 5.41E-12 | 0.240145963 | 0.247 | 0.193 | 1.30E-07 | 1.1 | CDC5L     | 1.279792746 |
| UHRF1BP1L    | 5.65E-12 | 0.259167194 | 0.253 | 0.2   | 1.36E-07 | 1.1 | UHRF1BP1L | 1.265       |
| RAN          | 6.91E-12 | 0.217826662 | 0.563 | 0.526 | 1.67E-07 | 1.1 | RAN       | 1.070342205 |
| INSR         | 7.39E-12 | 0.236611769 | 0.586 | 0.551 | 1.78E-07 | 1.1 | INSR      | 1.063520871 |
| RICTOR       | 8.46E-12 | 0.152080611 | 0.66  | 0.619 | 2.04E-07 | 1.1 | RICTOR    | 1.066235864 |
| HBS1L        | 1.01E-11 | 0.252556085 | 0.231 | 0.18  | 2.44E-07 | 1.1 | HBS1L     | 1.283333333 |
| LRRC75A      | 1.12E-11 | 0.250361586 | 0.179 | 0.133 | 2.69E-07 | 1.1 | LRRC75A   | 1.345864662 |
| PPP1R3B      | 1.14E-11 | 0.122199519 | 0.069 | 0.039 | 2.75E-07 | 1.1 | PPP1R3B   | 1.769230769 |
| RPS19        | 1.16E-11 | 0.190435915 | 0.241 | 0.18  | 2.80E-07 | 1.1 | RPS19     | 1.338888889 |
| CRBN         | 2.07E-11 | 0.199427557 | 0.188 | 0.14  | 4.98E-07 | 1.1 | CRBN      | 1.342857143 |
| MBD2         | 2.16E-11 | 0.32640052  | 0.35  | 0.304 | 5.21E-07 | 1.1 | MBD2      | 1.151315789 |
| TBC1D8       | 2.17E-11 | 0.261514492 | 0.474 | 0.425 | 5.24E-07 | 1.1 | TBC1D8    | 1.115294118 |
| RECK         | 2.29E-11 | 0.122472764 | 0.049 | 0.025 | 5.53E-07 | 1.1 | RECK      | 1.96        |
| SRSF12       | 2.56E-11 | 0.126397964 | 0.068 | 0.039 | 6.17E-07 | 1.1 | SRSF12    | 1.743589744 |
| AP000487.6   | 2.72E-11 | 0.288617752 | 0.208 | 0.159 | 6.56E-07 | 1.1 | AP000487. | 1.308176101 |
| GHR          | 2.76E-11 | 0.296748641 | 0.118 | 0.08  | 6.66E-07 | 1.1 | GHR       | 1.475       |
| FAM221A      | 3.36E-11 | 0.102696792 | 0.038 | 0.018 | 8.11E-07 | 1.1 | FAM221A   | 2.111111111 |
| C5orf56      | 3.39E-11 | 0.244022369 | 0.125 | 0.086 | 8.18E-07 | 1.1 | C5orf56   | 1.453488372 |
| APTR         | 3.66E-11 | 0.198619438 | 0.089 | 0.056 | 8.84E-07 | 1.1 | APTR      | 1.589285714 |
| DYNC2LI1     | 3.97E-11 | 0.170269149 | 0.125 | 0.086 | 9.56E-07 | 1.1 | DYNC2LI1  | 1.453488372 |
| RAB1A        | 4.08E-11 | 0.29073396  | 0.481 | 0.453 | 9.83E-07 | 1.1 | RAB1A     | 1.061810155 |
| PPHLN1       | 4.09E-11 | 0.281310899 | 0.381 | 0.334 | 9.87E-07 | 1.1 | PPHLN1    | 1.140718563 |
| TBC1D22B     | 4.45E-11 | 0.269782445 | 0.208 | 0.16  | 1.07E-06 | 1.1 | TBC1D22B  | 1.3         |
| C8orf59      | 5.73E-11 | 0.251615518 | 0.332 | 0.282 | 1.38E-06 | 1.1 | C8orf59   | 1.177304965 |
| S100A13      | 6.52E-11 | 0.177945027 | 0.553 | 0.51  | 1.57E-06 | 1.1 | S100A13   | 1.084313725 |

|               |          |             |       |       |          |     |           |             |
|---------------|----------|-------------|-------|-------|----------|-----|-----------|-------------|
| ZCCHC2        | 6.60E-11 | 0.305348539 | 0.272 | 0.225 | 1.59E-06 | 1.1 | ZCCHC2    | 1.208888889 |
| MAP3K14       | 7.20E-11 | 0.26434316  | 0.083 | 0.052 | 1.74E-06 | 1.1 | MAP3K14   | 1.596153846 |
| MMP7          | 7.24E-11 | 0.178704734 | 0.196 | 0.146 | 1.75E-06 | 1.1 | MMP7      | 1.342465753 |
| SCARB1        | 7.69E-11 | 0.113963986 | 0.055 | 0.03  | 1.85E-06 | 1.1 | SCARB1    | 1.833333333 |
| PAK3          | 1.09E-10 | 0.147191559 | 0.071 | 0.042 | 2.63E-06 | 1.1 | PAK3      | 1.69047619  |
| ASXL1         | 1.09E-10 | 0.227730788 | 0.304 | 0.252 | 2.64E-06 | 1.1 | ASXL1     | 1.206349206 |
| SPEN          | 1.18E-10 | 0.270208162 | 0.313 | 0.262 | 2.84E-06 | 1.1 | SPEN      | 1.194656489 |
| SMURF2        | 1.58E-10 | 0.342465784 | 0.331 | 0.287 | 3.80E-06 | 1.1 | SMURF2    | 1.153310105 |
| RUVBL1        | 1.61E-10 | 0.195562332 | 0.148 | 0.106 | 3.88E-06 | 1.1 | RUVBL1    | 1.396226415 |
| KDM3A         | 1.66E-10 | 0.200670499 | 0.148 | 0.106 | 4.01E-06 | 1.1 | KDM3A     | 1.396226415 |
| ARL8B         | 1.84E-10 | 0.287960932 | 0.314 | 0.268 | 4.43E-06 | 1.1 | ARL8B     | 1.171641791 |
| FAM49A        | 1.86E-10 | 0.123989    | 0.053 | 0.029 | 4.48E-06 | 1.1 | FAM49A    | 1.827586207 |
| KIF15         | 1.86E-10 | 0.131792811 | 0.024 | 0.009 | 4.48E-06 | 1.1 | KIF15     | 2.666666667 |
| TMEM71        | 2.32E-10 | 0.10592193  | 0.05  | 0.027 | 5.60E-06 | 1.1 | TMEM71    | 1.851851852 |
| ELK3          | 2.59E-10 | 0.220215009 | 0.153 | 0.112 | 6.24E-06 | 1.1 | ELK3      | 1.366071429 |
| PHACTR4       | 2.65E-10 | 0.324827821 | 0.368 | 0.327 | 6.40E-06 | 1.1 | PHACTR4   | 1.125382263 |
| FAXC          | 2.93E-10 | 0.134289855 | 0.043 | 0.022 | 7.06E-06 | 1.1 | FAXC      | 1.954545455 |
| VDAC3         | 2.93E-10 | 0.242523737 | 0.31  | 0.264 | 7.07E-06 | 1.1 | VDAC3     | 1.174242424 |
| SMR3B         | 3.05E-10 | 0.178191063 | 0.01  | 0.002 | 7.36E-06 | 1.1 | SMR3B     | 5           |
| EIF1AX        | 3.35E-10 | 0.258394357 | 0.284 | 0.236 | 8.09E-06 | 1.1 | EIF1AX    | 1.203389831 |
| RP11-659O3.1  | 4.31E-10 | 0.274786789 | 0.205 | 0.161 | 1.04E-05 | 1.1 | RP11-659O | 1.273291925 |
| CTD-2515A14.1 | 4.92E-10 | 0.123901418 | 0.052 | 0.029 | 1.19E-05 | 1.1 | CTD-2515A | 1.793103448 |
| FAR1          | 5.87E-10 | 0.198381598 | 0.126 | 0.089 | 1.41E-05 | 1.1 | FAR1      | 1.415730337 |
| RP11-122M14.3 | 6.95E-10 | 0.119411508 | 0.021 | 0.008 | 1.68E-05 | 1.1 | RP11-122M | 2.625       |
| SCD5          | 7.06E-10 | 0.15967612  | 0.063 | 0.037 | 1.70E-05 | 1.1 | SCD5      | 1.702702703 |
| RPS26         | 8.20E-10 | 0.163776467 | 0.153 | 0.112 | 1.98E-05 | 1.1 | RPS26     | 1.366071429 |
| DDX18         | 8.95E-10 | 0.238224627 | 0.332 | 0.284 | 2.16E-05 | 1.1 | DDX18     | 1.169014085 |
| RP11-293M10.1 | 9.18E-10 | 0.158609635 | 0.071 | 0.044 | 2.21E-05 | 1.1 | RP11-293M | 1.613636364 |
| ENO2          | 9.30E-10 | 0.129838006 | 0.072 | 0.044 | 2.24E-05 | 1.1 | ENO2      | 1.636363636 |
| PRSS8         | 9.40E-10 | 0.435276424 | 0.065 | 0.039 | 2.27E-05 | 1.1 | PRSS8     | 1.666666667 |
| ERRF1         | 9.51E-10 | 0.263920397 | 0.574 | 0.537 | 2.29E-05 | 1.1 | ERRF1     | 1.068901304 |
| ABCE1         | 1.22E-09 | 0.174684111 | 0.124 | 0.088 | 2.95E-05 | 1.1 | ABCE1     | 1.409090909 |
| MLF1          | 1.22E-09 | 0.252496847 | 0.29  | 0.242 | 2.95E-05 | 1.1 | MLF1      | 1.198347107 |
| MRPL24        | 1.26E-09 | 0.145437028 | 0.094 | 0.062 | 3.03E-05 | 1.1 | MRPL24    | 1.516129032 |
| GSTA4         | 1.44E-09 | 0.103958755 | 0.086 | 0.055 | 3.48E-05 | 1.1 | GSTA4     | 1.563636364 |
| RNF114        | 1.54E-09 | 0.224385865 | 0.163 | 0.123 | 3.71E-05 | 1.1 | RNF114    | 1.325203252 |
| CDC42         | 1.58E-09 | 0.182462068 | 0.722 | 0.716 | 3.80E-05 | 1.1 | CDC42     | 1.008379888 |
| NEK7          | 1.63E-09 | 0.275730522 | 0.215 | 0.172 | 3.92E-05 | 1.1 | NEK7      | 1.25        |
| NCL           | 1.71E-09 | 0.187944664 | 0.211 | 0.165 | 4.12E-05 | 1.1 | NCL       | 1.278787879 |
| MPDZ          | 1.74E-09 | 0.241894737 | 0.176 | 0.135 | 4.20E-05 | 1.1 | MPDZ      | 1.303703704 |
| NGFRAP1       | 1.79E-09 | 0.103106865 | 0.068 | 0.041 | 4.32E-05 | 1.1 | NGFRAP1   | 1.658536585 |
| SLC39A14      | 1.96E-09 | 0.22007926  | 0.241 | 0.194 | 4.73E-05 | 1.1 | SLC39A14  | 1.242268041 |
| CCT5          | 2.10E-09 | 0.191107592 | 0.342 | 0.291 | 5.07E-05 | 1.1 | CCT5      | 1.175257732 |
| PNPLA8        | 2.17E-09 | 0.379266355 | 0.312 | 0.276 | 5.23E-05 | 1.1 | PNPLA8    | 1.130434783 |
| TOX4          | 2.36E-09 | 0.222870437 | 0.218 | 0.176 | 5.69E-05 | 1.1 | TOX4      | 1.238636364 |
| CAPZA2        | 2.40E-09 | 0.27668748  | 0.346 | 0.304 | 5.79E-05 | 1.1 | CAPZA2    | 1.138157895 |
| NT5C3A        | 2.59E-09 | 0.245980839 | 0.198 | 0.155 | 6.23E-05 | 1.1 | NT5C3A    | 1.277419355 |
| PCBP2         | 2.92E-09 | 0.222135596 | 0.572 | 0.572 | 7.05E-05 | 1.1 | PCBP2     | 1           |
| MPP5          | 3.16E-09 | 0.271293084 | 0.251 | 0.207 | 7.61E-05 | 1.1 | MPP5      | 1.212560386 |
| ACTN1         | 3.17E-09 | 0.340933536 | 0.386 | 0.339 | 7.64E-05 | 1.1 | ACTN1     | 1.138643068 |
| RP1-292B18.4  | 3.55E-09 | 0.171328759 | 0.257 | 0.21  | 8.57E-05 | 1.1 | RP1-292B1 | 1.223809524 |
| CD55          | 3.67E-09 | 0.265751624 | 0.327 | 0.285 | 8.85E-05 | 1.1 | CD55      | 1.147368421 |

|             |          |             |       |       |             |     |            |             |
|-------------|----------|-------------|-------|-------|-------------|-----|------------|-------------|
| SLC12A3     | 4.52E-09 | 0.103063607 | 0.06  | 0.035 | 0.000109054 | 1.1 | SLC12A3    | 1.714285714 |
| PRICKLE1    | 4.70E-09 | 0.232249372 | 0.078 | 0.05  | 0.000113442 | 1.1 | PRICKLE1   | 1.56        |
| EGLN1       | 5.79E-09 | 0.148755839 | 0.126 | 0.09  | 0.000139728 | 1.1 | EGLN1      | 1.4         |
| GIPC2       | 6.07E-09 | 0.138013286 | 0.057 | 0.034 | 0.00014647  | 1.1 | GIPC2      | 1.676470588 |
| GAS2L3      | 6.48E-09 | 0.101569926 | 0.049 | 0.028 | 0.000156343 | 1.1 | GAS2L3     | 1.75        |
| TJP2        | 6.64E-09 | 0.313607419 | 0.35  | 0.319 | 0.000160012 | 1.1 | TJP2       | 1.097178683 |
| MAX         | 6.98E-09 | 0.182899894 | 0.171 | 0.13  | 0.000168421 | 1.1 | MAX        | 1.315384615 |
| IQGAP1      | 7.93E-09 | 0.22916652  | 0.469 | 0.435 | 0.00019123  | 1.1 | IQGAP1     | 1.07816092  |
| BANF1       | 8.00E-09 | 0.203969308 | 0.218 | 0.177 | 0.000192926 | 1.1 | BANF1      | 1.231638418 |
| TRA2B       | 8.46E-09 | 0.273308461 | 0.252 | 0.21  | 0.000204068 | 1.1 | TRA2B      | 1.2         |
| ARHGEF38    | 8.89E-09 | 0.186283005 | 0.525 | 0.481 | 0.000214332 | 1.1 | ARHGEF38   | 1.091476091 |
| C12orf60    | 9.46E-09 | 0.210466681 | 0.102 | 0.071 | 0.000227989 | 1.1 | C12orf60   | 1.436619718 |
| HIP1R       | 9.76E-09 | 0.100306254 | 0.035 | 0.018 | 0.00023531  | 1.1 | HIP1R      | 1.944444444 |
| GLRX        | 9.80E-09 | 0.314128065 | 0.33  | 0.284 | 0.00023633  | 1.1 | GLRX       | 1.161971831 |
| FABP6       | 1.25E-08 | 0.194828317 | 0.06  | 0.036 | 0.000300512 | 1.1 | FABP6      | 1.666666667 |
| MAGT1       | 1.26E-08 | 0.199715985 | 0.218 | 0.175 | 0.000303651 | 1.1 | MAGT1      | 1.245714286 |
| SETD5       | 1.34E-08 | 0.218356498 | 0.546 | 0.526 | 0.000323144 | 1.1 | SETD5      | 1.038022814 |
| IMPDH2      | 1.37E-08 | 0.131323115 | 0.076 | 0.049 | 0.000330407 | 1.1 | IMPDH2     | 1.551020408 |
| NIFK        | 1.45E-08 | 0.168867226 | 0.101 | 0.07  | 0.000349709 | 1.1 | NIFK       | 1.442857143 |
| CTC-425F1.4 | 1.86E-08 | 0.193498386 | 0.107 | 0.075 | 0.000447558 | 1.1 | CTC-425F1. | 1.426666667 |
| CLVS1       | 2.03E-08 | 0.134558148 | 0.091 | 0.062 | 0.00048923  | 1.1 | CLVS1      | 1.467741935 |
| PFKFB4      | 2.05E-08 | 0.156088176 | 0.06  | 0.037 | 0.0004948   | 1.1 | PFKFB4     | 1.621621622 |
| ANP32E      | 2.07E-08 | 0.173402311 | 0.113 | 0.081 | 0.000498851 | 1.1 | ANP32E     | 1.395061728 |
| PPIH        | 2.13E-08 | 0.153498623 | 0.128 | 0.094 | 0.000514619 | 1.1 | PPIH       | 1.361702128 |
| COPS4       | 2.15E-08 | 0.172909478 | 0.136 | 0.101 | 0.000517372 | 1.1 | COPS4      | 1.346534653 |
| CAMSAP1     | 2.21E-08 | 0.180848114 | 0.092 | 0.063 | 0.000533859 | 1.1 | CAMSAP1    | 1.46031746  |
| CCDC126     | 2.37E-08 | 0.150978473 | 0.103 | 0.072 | 0.000572602 | 1.1 | CCDC126    | 1.430555556 |
| SH3YL1      | 2.79E-08 | 0.223179416 | 0.241 | 0.2   | 0.000672115 | 1.1 | SH3YL1     | 1.205       |
| CALCOCO2    | 3.17E-08 | 0.228060626 | 0.29  | 0.248 | 0.000763921 | 1.1 | CALCOCO2   | 1.169354839 |
| LINC01235   | 3.18E-08 | 0.159636325 | 0.124 | 0.09  | 0.000766525 | 1.1 | LINC01235  | 1.377777778 |
| TANK        | 3.63E-08 | 0.310297118 | 0.49  | 0.473 | 0.000875974 | 1.1 | TANK       | 1.035940803 |
| NAA50       | 3.95E-08 | 0.225805875 | 0.258 | 0.217 | 0.000952597 | 1.1 | NAA50      | 1.188940092 |
| ADPRM       | 4.19E-08 | 0.144213787 | 0.089 | 0.061 | 0.001010167 | 1.1 | ADPRM      | 1.459016393 |
| RPP30       | 4.20E-08 | 0.14565087  | 0.105 | 0.074 | 0.001012136 | 1.1 | RPP30      | 1.418918919 |
| PFKFB3      | 4.34E-08 | 0.133137916 | 0.089 | 0.06  | 0.001046807 | 1.1 | PFKFB3     | 1.483333333 |
| EIF3J       | 4.40E-08 | 0.194311616 | 0.156 | 0.12  | 0.001060955 | 1.1 | EIF3J      | 1.3         |
| PLEKHG1     | 4.57E-08 | 0.197043701 | 0.134 | 0.1   | 0.001101596 | 1.1 | PLEKHG1    | 1.34        |
| FAM162A     | 5.29E-08 | 0.166309772 | 0.165 | 0.127 | 0.001275903 | 1.1 | FAM162A    | 1.299212598 |
| CSDE1       | 5.41E-08 | 0.176667547 | 0.569 | 0.547 | 0.001304131 | 1.1 | CSDE1      | 1.040219378 |
| FMR1        | 5.89E-08 | 0.145401718 | 0.106 | 0.075 | 0.001420546 | 1.1 | FMR1       | 1.413333333 |
| RASSF8      | 6.87E-08 | 0.204802271 | 0.137 | 0.103 | 0.00165651  | 1.1 | RASSF8     | 1.330097087 |
| SEC61G      | 7.42E-08 | 0.155184194 | 0.623 | 0.597 | 0.001789787 | 1.1 | SEC61G     | 1.043551089 |
| ARHGAP10    | 7.46E-08 | 0.241414363 | 0.15  | 0.116 | 0.001798789 | 1.1 | ARHGAP10   | 1.293103448 |
| MYNN        | 9.02E-08 | 0.14752861  | 0.098 | 0.069 | 0.002174105 | 1.1 | MYNN       | 1.420289855 |
| COPZ1       | 9.35E-08 | 0.21256512  | 0.355 | 0.319 | 0.002253994 | 1.1 | COPZ1      | 1.112852665 |
| DAPP1       | 1.14E-07 | 0.249625295 | 0.277 | 0.238 | 0.002739634 | 1.1 | DAPP1      | 1.163865546 |
| MYH9        | 1.21E-07 | 0.215936666 | 0.547 | 0.512 | 0.002911223 | 1.1 | MYH9       | 1.068359375 |
| PDGFC       | 1.27E-07 | 0.236765855 | 0.261 | 0.221 | 0.00306975  | 1.1 | PDGFC      | 1.180995475 |
| SBF2        | 1.46E-07 | 0.28581791  | 0.622 | 0.641 | 0.003525672 | 1.1 | SBF2       | 0.970358814 |
| ALDH7A1     | 1.47E-07 | 0.160070898 | 0.11  | 0.08  | 0.003534558 | 1.1 | ALDH7A1    | 1.375       |
| KIAA0226L   | 1.52E-07 | 0.126177524 | 0.073 | 0.048 | 0.003655038 | 1.1 | KIAA0226L  | 1.520833333 |
| RAB14       | 1.77E-07 | 0.202246392 | 0.164 | 0.129 | 0.004257111 | 1.1 | RAB14      | 1.271317829 |

|                |          |             |       |       |             |     |            |             |
|----------------|----------|-------------|-------|-------|-------------|-----|------------|-------------|
| PIGA           | 1.77E-07 | 0.166459164 | 0.125 | 0.093 | 0.004259857 | 1.1 | PIGA       | 1.344086022 |
| LAMP2          | 1.83E-07 | 0.270900084 | 0.278 | 0.242 | 0.004420264 | 1.1 | LAMP2      | 1.148760331 |
| UBR5           | 1.97E-07 | 0.183330912 | 0.5   | 0.468 | 0.004746513 | 1.1 | UBR5       | 1.068376068 |
| SMC3           | 2.00E-07 | 0.147928559 | 0.131 | 0.099 | 0.00483299  | 1.1 | SMC3       | 1.323232323 |
| ZRANB1         | 2.29E-07 | 0.201576263 | 0.186 | 0.149 | 0.005511305 | 1.1 | ZRANB1     | 1.248322148 |
| USP38          | 2.35E-07 | 0.151799272 | 0.065 | 0.043 | 0.005655833 | 1.1 | USP38      | 1.511627907 |
| SRP72          | 2.43E-07 | 0.159225897 | 0.192 | 0.155 | 0.005847733 | 1.1 | SRP72      | 1.238709677 |
| HSD17B6        | 2.46E-07 | 0.209213401 | 0.032 | 0.017 | 0.005927094 | 1.1 | HSD17B6    | 1.882352941 |
| ARHGEF10L      | 2.63E-07 | 0.193617278 | 0.201 | 0.164 | 0.006345263 | 1.1 | ARHGEF10L  | 1.225609756 |
| AC008074.1     | 2.81E-07 | 0.107794804 | 0.062 | 0.04  | 0.006785502 | 1.1 | AC008074.  | 1.55        |
| MAP7D1         | 2.82E-07 | 0.20119399  | 0.186 | 0.15  | 0.006800163 | 1.1 | MAP7D1     | 1.24        |
| PPIL4          | 2.92E-07 | 0.18837321  | 0.162 | 0.127 | 0.007051836 | 1.1 | PPIL4      | 1.275590551 |
| CTR9           | 3.22E-07 | 0.162882547 | 0.113 | 0.083 | 0.007774688 | 1.1 | CTR9       | 1.361445783 |
| C5orf34        | 3.42E-07 | 0.105082453 | 0.077 | 0.052 | 0.008242018 | 1.1 | C5orf34    | 1.480769231 |
| BTG3           | 3.67E-07 | 0.187484808 | 0.213 | 0.176 | 0.008839164 | 1.1 | BTG3       | 1.210227273 |
| TTC37          | 3.86E-07 | 0.172573137 | 0.166 | 0.131 | 0.009302566 | 1.1 | TTC37      | 1.267175573 |
| C6orf48        | 4.10E-07 | 0.128472085 | 0.099 | 0.071 | 0.009885787 | 1.1 | C6orf48    | 1.394366197 |
| PA2G4          | 4.33E-07 | 0.117000802 | 0.126 | 0.094 | 0.010450455 | 1.1 | PA2G4      | 1.340425532 |
| GLIS3          | 4.37E-07 | 0.336262837 | 0.189 | 0.157 | 0.010537436 | 1.1 | GLIS3      | 1.203821656 |
| FTL            | 4.40E-07 | 0.138441645 | 0.556 | 0.529 | 0.010621678 | 1.1 | FTL        | 1.051039698 |
| SNRPB2         | 4.72E-07 | 0.193666252 | 0.378 | 0.341 | 0.011382048 | 1.1 | SNRPB2     | 1.108504399 |
| U2SURP         | 4.80E-07 | 0.209071819 | 0.268 | 0.235 | 0.011579351 | 1.1 | U2SURP     | 1.140425532 |
| GBE1           | 5.00E-07 | 0.39730191  | 0.384 | 0.357 | 0.012063049 | 1.1 | GBE1       | 1.075630252 |
| SRFBP1         | 5.06E-07 | 0.224543491 | 0.179 | 0.146 | 0.012201615 | 1.1 | SRFBP1     | 1.226027397 |
| RP11-445F6.2   | 5.23E-07 | 0.22810956  | 0.023 | 0.011 | 0.012615876 | 1.1 | RP11-445F6 | 2.090909091 |
| NIT2           | 5.37E-07 | 0.15050133  | 0.135 | 0.103 | 0.012958905 | 1.1 | NIT2       | 1.310679612 |
| PAFAH1B1       | 5.58E-07 | 0.256174694 | 0.396 | 0.367 | 0.013462494 | 1.1 | PAFAH1B1   | 1.079019074 |
| TAB2           | 5.62E-07 | 0.22788546  | 0.316 | 0.281 | 0.01354066  | 1.1 | TAB2       | 1.12455516  |
| RLIM           | 5.76E-07 | 0.130631413 | 0.082 | 0.057 | 0.013894294 | 1.1 | RLIM       | 1.438596491 |
| SNX2           | 6.65E-07 | 0.170941959 | 0.166 | 0.133 | 0.016040184 | 1.1 | SNX2       | 1.248120301 |
| RP11-398K22.12 | 6.98E-07 | 0.103355064 | 0.057 | 0.036 | 0.016834998 | 1.1 | RP11-398K  | 1.583333333 |
| MTDH           | 7.40E-07 | 0.192902842 | 0.331 | 0.292 | 0.017849357 | 1.1 | MTDH       | 1.133561644 |
| PJA2           | 7.52E-07 | 0.201960972 | 0.278 | 0.239 | 0.018122782 | 1.1 | PJA2       | 1.163179916 |
| ST6GALNAC5     | 7.56E-07 | 0.160369549 | 0.224 | 0.182 | 0.018233886 | 1.1 | ST6GALNAC5 | 1.230769231 |
| KCNQ5          | 7.96E-07 | 0.146513106 | 0.071 | 0.048 | 0.019186085 | 1.1 | KCNQ5      | 1.479166667 |
| TCERG1         | 8.57E-07 | 0.149948046 | 0.17  | 0.135 | 0.020660668 | 1.1 | TCERG1     | 1.259259259 |
| CMTM7          | 8.73E-07 | 0.254216579 | 0.188 | 0.155 | 0.021046322 | 1.1 | CMTM7      | 1.212903226 |
| HDAC2          | 9.28E-07 | 0.188375752 | 0.213 | 0.179 | 0.022379697 | 1.1 | HDAC2      | 1.189944134 |
| RBMS2          | 9.45E-07 | 0.190289121 | 0.166 | 0.133 | 0.022777212 | 1.1 | RBMS2      | 1.248120301 |
| PFDN1          | 1.01E-06 | 0.162714317 | 0.258 | 0.218 | 0.024237738 | 1.1 | PFDN1      | 1.183486239 |
| GMPR2          | 1.10E-06 | 0.116396822 | 0.087 | 0.061 | 0.026622052 | 1.1 | GMPR2      | 1.426229508 |
| RP11-392O1.4   | 1.11E-06 | 0.133166817 | 0.038 | 0.022 | 0.026730184 | 1.1 | RP11-392O  | 1.727272727 |
| KPNB1          | 1.11E-06 | 0.252533946 | 0.425 | 0.404 | 0.026863848 | 1.1 | KPNB1      | 1.051980198 |
| HLA-B          | 1.19E-06 | 0.128548123 | 0.566 | 0.54  | 0.028626682 | 1.1 | HLA-B      | 1.048148148 |
| RND3           | 1.28E-06 | 0.253097077 | 0.381 | 0.348 | 0.030796418 | 1.1 | RND3       | 1.094827586 |
| PROL1          | 1.33E-06 | 0.189265943 | 0.02  | 0.009 | 0.031996006 | 1.1 | PROL1      | 2.222222222 |
| ADH5           | 1.33E-06 | 0.164366523 | 0.11  | 0.083 | 0.032143125 | 1.1 | ADH5       | 1.325301205 |
| RPL13A         | 1.34E-06 | 0.190479869 | 0.506 | 0.476 | 0.032277172 | 1.1 | RPL13A     | 1.06302521  |
| ETS1           | 1.38E-06 | 0.176826516 | 0.09  | 0.065 | 0.033367861 | 1.1 | ETS1       | 1.384615385 |
| HSPD1          | 1.46E-06 | 0.151019837 | 0.291 | 0.249 | 0.035109856 | 1.1 | HSPD1      | 1.168674699 |
| DRG1           | 1.47E-06 | 0.178803788 | 0.209 | 0.174 | 0.035530915 | 1.1 | DRG1       | 1.201149425 |
| SUMO1          | 1.84E-06 | 0.177243182 | 0.515 | 0.495 | 0.044263433 | 1.1 | SUMO1      | 1.04040404  |

|             |           |             |       |       |             |       |          |             |
|-------------|-----------|-------------|-------|-------|-------------|-------|----------|-------------|
| ATF2        | 2.00E-06  | 0.186829475 | 0.17  | 0.138 | 0.048189552 | 1.1   | ATF2     | 1.231884058 |
| MTMR1       | 2.07E-06  | 0.186598661 | 0.15  | 0.12  | 0.04996879  | 1.1   | MTMR1    | 1.25        |
| ANXA12      | 0         | 2.122008455 | 0.974 | 0.57  |             | 0 1.2 | ANXA1    | 1.70877193  |
| CLDN12      | 0         | 2.095629329 | 0.658 | 0.182 |             | 0 1.2 | CLDN1    | 3.615384615 |
| ADAMTS91    | 0         | 1.988700505 | 0.621 | 0.169 |             | 0 1.2 | ADAMTS9  | 3.674556213 |
| CALD11      | 0         | 1.962903275 | 0.77  | 0.248 |             | 0 1.2 | CALD1    | 3.10483871  |
| LIPH1       | 0         | 1.890244431 | 0.657 | 0.273 |             | 0 1.2 | LIPH     | 2.406593407 |
| RCAN11      | 0         | 1.678397456 | 0.808 | 0.352 |             | 0 1.2 | RCAN1    | 2.295454545 |
| SLPI        | 0         | 1.646534433 | 0.864 | 0.517 |             | 0 1.2 | SLPI     | 1.671179884 |
| CCL281      | 0         | 1.572377805 | 0.735 | 0.326 |             | 0 1.2 | CCL28    | 2.254601227 |
| GLIPR11     | 0         | 1.528737247 | 0.557 | 0.145 |             | 0 1.2 | GLIPR1   | 3.84137931  |
| ITGA21      | 0         | 1.421118923 | 0.737 | 0.353 |             | 0 1.2 | ITGA2    | 2.087818697 |
| BCL2A1      | 0         | 1.390616965 | 0.314 | 0.058 |             | 0 1.2 | BCL2A1   | 5.413793103 |
| ALDH1A31    | 0         | 1.341112332 | 0.652 | 0.236 |             | 0 1.2 | ALDH1A3  | 2.762711864 |
| GABRP1      | 0         | 1.289855248 | 0.594 | 0.23  |             | 0 1.2 | GABRP    | 2.582608696 |
| DAPP11      | 1.52E-306 | 1.263331754 | 0.55  | 0.209 | 3.67E-302   | 1.2   | DAPP1    | 2.631578947 |
| MAP3K131    | 5.32E-303 | 1.254517734 | 0.872 | 0.594 | 1.28E-298   | 1.2   | MAP3K13  | 1.468013468 |
| ST6GALNAC51 | 2.22E-291 | 1.353254199 | 0.477 | 0.156 | 5.36E-287   | 1.2   | ST6GALNA | 3.057692308 |
| B2M1        | 5.59E-284 | 0.884570667 | 0.988 | 0.97  | 1.35E-279   | 1.2   | B2M      | 1.018556701 |
| IGF2BP21    | 1.57E-274 | 1.065579955 | 0.586 | 0.238 | 3.78E-270   | 1.2   | IGF2BP2  | 2.462184874 |
| SVIL1       | 1.19E-273 | 1.031632085 | 0.86  | 0.556 | 2.87E-269   | 1.2   | SVIL     | 1.54676259  |
| PDE4B1      | 1.40E-263 | 0.956470207 | 0.864 | 0.48  | 3.38E-259   | 1.2   | PDE4B    | 1.8         |
| MAP1B1      | 6.06E-258 | 1.15221267  | 0.564 | 0.237 | 1.46E-253   | 1.2   | MAP1B    | 2.379746835 |
| RPL241      | 1.32E-249 | 0.747942645 | 0.963 | 0.911 | 3.18E-245   | 1.2   | RPL24    | 1.057080132 |
| RPS27A1     | 1.05E-248 | 0.661594764 | 0.991 | 0.969 | 2.52E-244   | 1.2   | RPS27A   | 1.022703818 |
| PTN1        | 7.58E-243 | 1.4331657   | 0.335 | 0.09  | 1.83E-238   | 1.2   | PTN      | 3.722222222 |
| KRT231      | 3.34E-239 | 1.236998557 | 0.384 | 0.124 | 8.05E-235   | 1.2   | KRT23    | 3.096774194 |
| KRT151      | 2.93E-233 | 0.996598515 | 0.428 | 0.143 | 7.07E-229   | 1.2   | KRT15    | 2.993006993 |
| RPL341      | 3.59E-230 | 0.628602641 | 0.989 | 0.977 | 8.65E-226   | 1.2   | RPL34    | 1.012282497 |
| NPM11       | 1.81E-224 | 0.822740119 | 0.913 | 0.693 | 4.37E-220   | 1.2   | NPM1     | 1.317460317 |
| RPL211      | 2.10E-224 | 0.73696513  | 0.962 | 0.86  | 5.05E-220   | 1.2   | RPL21    | 1.118604651 |
| ADAMTS9-AS2 | 1.91E-215 | 0.986284643 | 0.398 | 0.136 | 4.60E-211   | 1.2   | ADAMTS9- | 2.926470588 |
| SLC47A11    | 3.74E-204 | 0.688273903 | 0.947 | 0.89  | 9.03E-200   | 1.2   | SLC47A1  | 1.064044944 |
| MAP21       | 2.99E-203 | 0.812042075 | 0.286 | 0.077 | 7.20E-199   | 1.2   | MAP2     | 3.714285714 |
| USP531      | 7.81E-203 | 1.063025373 | 0.826 | 0.603 | 1.88E-198   | 1.2   | USP53    | 1.369817579 |
| ZPLD1       | 1.18E-199 | 1.053091083 | 0.226 | 0.051 | 2.86E-195   | 1.2   | ZPLD1    | 4.431372549 |
| ANKRD36C    | 2.67E-199 | 1.043048212 | 0.734 | 0.43  | 6.44E-195   | 1.2   | ANKRD36C | 1.706976744 |
| SLC25A371   | 1.82E-197 | 1.001135832 | 0.68  | 0.354 | 4.39E-193   | 1.2   | SLC25A37 | 1.920903955 |
| RPL35A1     | 1.83E-196 | 0.593944493 | 0.987 | 0.951 | 4.42E-192   | 1.2   | RPL35A   | 1.03785489  |
| PLCB1       | 2.28E-195 | 1.115653902 | 0.474 | 0.198 | 5.50E-191   | 1.2   | PLCB1    | 2.393939394 |
| MYL12A      | 4.76E-195 | 0.782470489 | 0.945 | 0.859 | 1.15E-190   | 1.2   | MYL12A   | 1.100116414 |
| HSP90AB11   | 3.69E-192 | 0.748467228 | 0.948 | 0.828 | 8.89E-188   | 1.2   | HSP90AB1 | 1.144927536 |
| STX121      | 8.58E-192 | 1.02876339  | 0.574 | 0.295 | 2.07E-187   | 1.2   | STX12    | 1.945762712 |
| ELK31       | 6.47E-191 | 0.750904942 | 0.312 | 0.096 | 1.56E-186   | 1.2   | ELK3     | 3.25        |
| TPT1-AS11   | 1.32E-189 | 0.926088944 | 0.479 | 0.209 | 3.18E-185   | 1.2   | TPT1-AS1 | 2.291866029 |
| RPL301      | 5.94E-188 | 0.533405357 | 0.989 | 0.95  | 1.43E-183   | 1.2   | RPL30    | 1.041052632 |
| KRT6B       | 1.04E-187 | 1.007632718 | 0.201 | 0.042 | 2.50E-183   | 1.2   | KRT6B    | 4.785714286 |
| ZFAS11      | 4.73E-187 | 0.64907236  | 0.97  | 0.924 | 1.14E-182   | 1.2   | ZFAS1    | 1.04978355  |
| PI3         | 6.57E-187 | 1.997901817 | 0.358 | 0.125 | 1.59E-182   | 1.2   | PI3      | 2.864       |
| PALLD       | 1.67E-185 | 0.937602434 | 0.654 | 0.375 | 4.02E-181   | 1.2   | PALLD    | 1.744       |
| RPS71       | 9.02E-185 | 0.58331927  | 0.978 | 0.91  | 2.18E-180   | 1.2   | RPS7     | 1.074725275 |
| EMP11       | 1.41E-183 | 1.065701245 | 0.841 | 0.671 | 3.39E-179   | 1.2   | EMP1     | 1.253353204 |

|           |           |             |       |       |           |     |          |             |
|-----------|-----------|-------------|-------|-------|-----------|-----|----------|-------------|
| ITGB81    | 3.28E-183 | 0.899872401 | 0.748 | 0.47  | 7.91E-179 | 1.2 | ITGB8    | 1.591489362 |
| MET1      | 4.55E-183 | 0.898978919 | 0.471 | 0.201 | 1.10E-178 | 1.2 | MET      | 2.343283582 |
| ANXA21    | 2.31E-181 | 0.778025578 | 0.973 | 0.922 | 5.58E-177 | 1.2 | ANXA2    | 1.055314534 |
| DAPK21    | 1.84E-180 | 0.875017061 | 0.48  | 0.207 | 4.44E-176 | 1.2 | DAPK2    | 2.31884058  |
| COL6A21   | 1.51E-179 | 0.808411542 | 0.219 | 0.051 | 3.64E-175 | 1.2 | COL6A2   | 4.294117647 |
| TPM41     | 3.85E-170 | 0.935031298 | 0.615 | 0.348 | 9.29E-166 | 1.2 | TPM4     | 1.767241379 |
| MTHFD2L   | 7.36E-170 | 1.18599326  | 0.646 | 0.376 | 1.77E-165 | 1.2 | MTHFD2L  | 1.718085106 |
| SOD2      | 9.43E-170 | 0.710179704 | 0.955 | 0.758 | 2.27E-165 | 1.2 | SOD2     | 1.259894459 |
| MAMDC21   | 1.30E-169 | 0.709316301 | 0.948 | 0.84  | 3.14E-165 | 1.2 | MAMDC2   | 1.128571429 |
| PGK1      | 1.83E-168 | 0.819729723 | 0.776 | 0.532 | 4.41E-164 | 1.2 | PGK1     | 1.458646617 |
| RPL141    | 8.69E-168 | 0.500661695 | 0.989 | 0.957 | 2.10E-163 | 1.2 | RPL14    | 1.033437827 |
| RPS231    | 1.55E-162 | 0.488499733 | 0.99  | 0.966 | 3.73E-158 | 1.2 | RPS23    | 1.02484472  |
| PLEKHA61  | 2.07E-161 | 0.637343703 | 0.92  | 0.823 | 5.00E-157 | 1.2 | PLEKHA6  | 1.117861482 |
| RPS3A1    | 1.32E-160 | 0.600879524 | 0.952 | 0.893 | 3.18E-156 | 1.2 | RPS3A    | 1.066069429 |
| CTSV1     | 4.41E-160 | 1.003692251 | 0.294 | 0.096 | 1.06E-155 | 1.2 | CTSV     | 3.0625      |
| RPS61     | 1.74E-159 | 0.515151628 | 0.989 | 0.977 | 4.18E-155 | 1.2 | RPS6     | 1.012282497 |
| NFKBIZ1   | 2.21E-158 | 0.770713968 | 0.788 | 0.535 | 5.33E-154 | 1.2 | NFKBIZ   | 1.472897196 |
| RPL51     | 4.60E-157 | 0.519998644 | 0.977 | 0.938 | 1.11E-152 | 1.2 | RPL5     | 1.041577825 |
| CELF21    | 1.60E-156 | 0.726549326 | 0.308 | 0.105 | 3.87E-152 | 1.2 | CELF2    | 2.933333333 |
| MAP4K4    | 4.72E-155 | 0.875702089 | 0.457 | 0.213 | 1.14E-150 | 1.2 | MAP4K4   | 2.145539906 |
| RPL111    | 1.91E-154 | 0.501504465 | 0.987 | 0.956 | 4.60E-150 | 1.2 | RPL11    | 1.032426778 |
| CFLAR     | 3.72E-153 | 1.007159636 | 0.559 | 0.318 | 8.97E-149 | 1.2 | CFLAR    | 1.757861635 |
| NACA1     | 9.24E-152 | 0.499124766 | 0.968 | 0.902 | 2.23E-147 | 1.2 | NACA     | 1.073170732 |
| DSG31     | 2.34E-151 | 0.974061558 | 0.133 | 0.023 | 5.64E-147 | 1.2 | DSG3     | 5.782608696 |
| APOO1     | 6.91E-150 | 0.449604886 | 0.988 | 0.964 | 1.67E-145 | 1.2 | APOO     | 1.024896266 |
| SAA4      | 1.09E-148 | 0.812629455 | 0.313 | 0.112 | 2.63E-144 | 1.2 | SAA4     | 2.794642857 |
| EIF3E1    | 4.05E-146 | 0.680528104 | 0.785 | 0.553 | 9.76E-142 | 1.2 | EIF3E    | 1.419529837 |
| SUB11     | 7.51E-142 | 0.717171278 | 0.795 | 0.622 | 1.81E-137 | 1.2 | SUB1     | 1.278135048 |
| RSL24D11  | 7.94E-142 | 0.721523703 | 0.759 | 0.539 | 1.91E-137 | 1.2 | RSL24D1  | 1.408163265 |
| CDCP1     | 1.08E-140 | 0.816405995 | 0.496 | 0.256 | 2.61E-136 | 1.2 | CDCP1    | 1.9375      |
| GLRX1     | 2.73E-140 | 1.156680388 | 0.503 | 0.266 | 6.59E-136 | 1.2 | GLRX     | 1.890977444 |
| RPL321    | 6.04E-138 | 0.433332014 | 0.991 | 0.974 | 1.46E-133 | 1.2 | RPL32    | 1.017453799 |
| TIAM11    | 1.46E-137 | 0.899931502 | 0.454 | 0.22  | 3.52E-133 | 1.2 | TIAM1    | 2.063636364 |
| HCAR21    | 6.09E-137 | 0.875870497 | 0.261 | 0.087 | 1.47E-132 | 1.2 | HCAR2    | 3           |
| RPS15A1   | 1.34E-136 | 0.491360285 | 0.978 | 0.938 | 3.24E-132 | 1.2 | RPS15A   | 1.042643923 |
| FGF21     | 1.05E-134 | 0.570192916 | 0.15  | 0.032 | 2.54E-130 | 1.2 | FGF2     | 4.6875      |
| MYL6      | 1.68E-134 | 0.590583264 | 0.972 | 0.93  | 4.06E-130 | 1.2 | MYL6     | 1.04516129  |
| LUCAT1    | 3.44E-134 | 0.888455047 | 0.408 | 0.181 | 8.29E-130 | 1.2 | LUCAT1   | 2.254143646 |
| C5orf461  | 1.92E-133 | 0.701384799 | 0.283 | 0.1   | 4.62E-129 | 1.2 | C5orf46  | 2.83        |
| BIRC31    | 3.38E-133 | 0.812083941 | 0.815 | 0.591 | 8.14E-129 | 1.2 | BIRC3    | 1.379018613 |
| TSHZ21    | 1.62E-132 | 0.778300451 | 0.471 | 0.227 | 3.91E-128 | 1.2 | TSHZ2    | 2.074889868 |
| AKT31     | 3.33E-132 | 0.91267711  | 0.562 | 0.324 | 8.03E-128 | 1.2 | AKT3     | 1.734567901 |
| SEC61G1   | 2.38E-129 | 0.759738932 | 0.764 | 0.582 | 5.73E-125 | 1.2 | SEC61G   | 1.312714777 |
| ARHGEF101 | 4.94E-128 | 0.811224543 | 0.416 | 0.199 | 1.19E-123 | 1.2 | ARHGEF10 | 2.090452261 |
| PDLIM51   | 5.98E-127 | 0.694298398 | 0.864 | 0.73  | 1.44E-122 | 1.2 | PDLIM5   | 1.183561644 |
| RPS171    | 9.77E-124 | 0.450216663 | 0.969 | 0.938 | 2.35E-119 | 1.2 | RPS17    | 1.033049041 |
| MAML21    | 3.00E-123 | 0.651836964 | 0.672 | 0.389 | 7.23E-119 | 1.2 | MAML2    | 1.727506427 |
| PIGR1     | 1.26E-121 | 0.698077038 | 0.467 | 0.226 | 3.05E-117 | 1.2 | PIGR     | 2.066371681 |
| RPL311    | 1.18E-119 | 0.470989352 | 0.965 | 0.92  | 2.84E-115 | 1.2 | RPL31    | 1.048913043 |
| RASA21    | 3.83E-118 | 0.696535632 | 0.729 | 0.52  | 9.23E-114 | 1.2 | RASA2    | 1.401923077 |
| OOEP1     | 7.80E-118 | 0.421687392 | 0.99  | 0.963 | 1.88E-113 | 1.2 | OOEP     | 1.028037383 |
| EEF1A11   | 9.99E-118 | 0.438414642 | 0.987 | 0.973 | 2.41E-113 | 1.2 | EEF1A1   | 1.014388489 |

|                |           |             |       |       |           |     |           |             |
|----------------|-----------|-------------|-------|-------|-----------|-----|-----------|-------------|
| EIF4A21        | 2.29E-113 | 0.667498937 | 0.821 | 0.684 | 5.52E-109 | 1.2 | EIF4A2    | 1.200292398 |
| C4orf31        | 2.13E-111 | 0.761642881 | 0.702 | 0.519 | 5.14E-107 | 1.2 | C4orf3    | 1.352601156 |
| HDAC9          | 4.91E-108 | 0.696490511 | 0.274 | 0.107 | 1.18E-103 | 1.2 | HDAC9     | 2.560747664 |
| SELK1          | 2.70E-106 | 0.665953949 | 0.761 | 0.596 | 6.51E-102 | 1.2 | SELK      | 1.276845638 |
| RPS241         | 2.14E-105 | 0.363640738 | 0.988 | 0.964 | 5.16E-101 | 1.2 | RPS24     | 1.024896266 |
| SRPK1          | 3.43E-105 | 0.736469771 | 0.658 | 0.469 | 8.28E-101 | 1.2 | SRPK1     | 1.402985075 |
| RPL42          | 1.52E-103 | 0.428749565 | 0.951 | 0.884 | 3.66E-99  | 1.2 | RPL4      | 1.075791855 |
| DSG21          | 6.48E-103 | 0.665909087 | 0.445 | 0.245 | 1.56E-98  | 1.2 | DSG2      | 1.816326531 |
| GLIS31         | 1.25E-101 | 0.793562338 | 0.321 | 0.143 | 3.02E-97  | 1.2 | GLIS3     | 2.244755245 |
| RP11-608O21.11 | 5.02E-101 | 0.61613477  | 0.725 | 0.519 | 1.21E-96  | 1.2 | RP11-608O | 1.396917148 |
| WFDC2          | 7.41E-100 | 1.007946038 | 0.513 | 0.305 | 1.79E-95  | 1.2 | WFDC2     | 1.681967213 |
| SDC4           | 8.62E-100 | 0.936951348 | 0.508 | 0.311 | 2.08E-95  | 1.2 | SDC4      | 1.633440514 |
| MICAL31        | 1.63E-99  | 0.735869922 | 0.415 | 0.216 | 3.92E-95  | 1.2 | MICAL3    | 1.921296296 |
| SLC28A3        | 4.68E-99  | 0.679817147 | 0.341 | 0.159 | 1.13E-94  | 1.2 | SLC28A3   | 2.144654088 |
| EGFR           | 1.25E-98  | 0.697051048 | 0.345 | 0.162 | 3.01E-94  | 1.2 | EGFR      | 2.12962963  |
| MGP1           | 1.35E-98  | 0.844935606 | 0.896 | 0.811 | 3.26E-94  | 1.2 | MGP       | 1.104808878 |
| BACE21         | 1.85E-98  | 0.694884887 | 0.498 | 0.293 | 4.46E-94  | 1.2 | BACE2     | 1.699658703 |
| CRYAB1         | 1.15E-97  | 0.669103182 | 0.455 | 0.237 | 2.78E-93  | 1.2 | CRYAB     | 1.919831224 |
| PTRF1          | 2.50E-97  | 0.562563254 | 0.257 | 0.102 | 6.03E-93  | 1.2 | PTRF      | 2.519607843 |
| TNFAIP6        | 2.68E-97  | 1.184024117 | 0.377 | 0.186 | 6.46E-93  | 1.2 | TNFAIP6   | 2.02688172  |
| SDCBP          | 2.93E-97  | 0.738119062 | 0.771 | 0.602 | 7.07E-93  | 1.2 | SDCBP     | 1.280730897 |
| EIF4A11        | 6.15E-97  | 0.649248421 | 0.595 | 0.384 | 1.48E-92  | 1.2 | EIF4A1    | 1.549479167 |
| DDX211         | 2.77E-96  | 0.691292944 | 0.679 | 0.506 | 6.67E-92  | 1.2 | DDX21     | 1.341897233 |
| RPL231         | 5.76E-96  | 0.415633466 | 0.966 | 0.911 | 1.39E-91  | 1.2 | RPL23     | 1.060373216 |
| FAM172A1       | 1.12E-95  | 0.746012421 | 0.755 | 0.604 | 2.70E-91  | 1.2 | FAM172A   | 1.25        |
| SLC5A1         | 1.90E-94  | 0.478263937 | 0.149 | 0.042 | 4.58E-90  | 1.2 | SLC5A1    | 3.547619048 |
| MYO5B1         | 2.36E-94  | 0.555162935 | 0.782 | 0.585 | 5.69E-90  | 1.2 | MYO5B     | 1.336752137 |
| TMEM41A1       | 5.48E-94  | 0.604015254 | 0.284 | 0.125 | 1.32E-89  | 1.2 | TMEM41A   | 2.272       |
| EDN11          | 3.70E-93  | 0.632890255 | 0.277 | 0.118 | 8.93E-89  | 1.2 | EDN1      | 2.347457627 |
| INSR1          | 6.58E-93  | 0.764534368 | 0.7   | 0.54  | 1.59E-88  | 1.2 | INSR      | 1.296296296 |
| AC159540.1     | 8.14E-93  | 0.702653616 | 0.233 | 0.091 | 1.96E-88  | 1.2 | AC159540. | 2.56043956  |
| CD551          | 3.35E-92  | 0.686607747 | 0.467 | 0.271 | 8.08E-88  | 1.2 | CD55      | 1.723247232 |
| SSR31          | 3.79E-92  | 0.6409612   | 0.613 | 0.427 | 9.13E-88  | 1.2 | SSR3      | 1.43559719  |
| RPL71          | 5.38E-92  | 0.397981335 | 0.958 | 0.868 | 1.30E-87  | 1.2 | RPL7      | 1.103686636 |
| PROM1          | 1.24E-91  | 0.620074936 | 0.404 | 0.209 | 3.00E-87  | 1.2 | PROM1     | 1.933014354 |
| CCL20          | 3.81E-91  | 1.786661768 | 0.338 | 0.167 | 9.18E-87  | 1.2 | CCL20     | 2.023952096 |
| FAM129A1       | 1.15E-90  | 0.813124775 | 0.449 | 0.255 | 2.77E-86  | 1.2 | FAM129A   | 1.760784314 |
| CMIP1          | 1.45E-90  | 0.654104253 | 0.441 | 0.249 | 3.49E-86  | 1.2 | CMIP      | 1.771084337 |
| LPIN11         | 2.08E-90  | 0.741919321 | 0.367 | 0.189 | 5.03E-86  | 1.2 | LPIN1     | 1.941798942 |
| MACC1          | 2.86E-90  | 0.771476705 | 0.595 | 0.395 | 6.89E-86  | 1.2 | MACC1     | 1.506329114 |
| ETS11          | 3.95E-90  | 0.469707835 | 0.174 | 0.056 | 9.52E-86  | 1.2 | ETS1      | 3.107142857 |
| ILF21          | 4.74E-90  | 0.635181259 | 0.605 | 0.412 | 1.14E-85  | 1.2 | ILF2      | 1.468446602 |
| CAST           | 6.71E-90  | 0.639159565 | 0.663 | 0.497 | 1.62E-85  | 1.2 | CAST      | 1.334004024 |
| LYN            | 7.98E-90  | 0.5416848   | 0.62  | 0.387 | 1.92E-85  | 1.2 | LYN       | 1.602067183 |
| GBP21          | 9.24E-90  | 0.637285442 | 0.757 | 0.6   | 2.23E-85  | 1.2 | GBP2      | 1.261666667 |
| ARL4C1         | 1.09E-89  | 0.524136962 | 0.237 | 0.093 | 2.63E-85  | 1.2 | ARL4C     | 2.548387097 |
| SLC6A141       | 5.14E-89  | 0.605650226 | 0.235 | 0.092 | 1.24E-84  | 1.2 | SLC6A14   | 2.554347826 |
| FAM177B        | 8.76E-89  | 0.807141448 | 0.667 | 0.474 | 2.11E-84  | 1.2 | FAM177B   | 1.407172996 |
| KLK51          | 5.93E-88  | 0.343048608 | 0.109 | 0.025 | 1.43E-83  | 1.2 | KLK5      | 4.36        |
| MYO3B1         | 6.01E-88  | 0.732742762 | 0.294 | 0.137 | 1.45E-83  | 1.2 | MYO3B     | 2.145985401 |
| SMS1           | 6.87E-88  | 0.720912034 | 0.479 | 0.288 | 1.66E-83  | 1.2 | SMS       | 1.663194444 |
| MYO1E          | 5.57E-87  | 0.712513656 | 0.64  | 0.459 | 1.34E-82  | 1.2 | MYO1E     | 1.394335512 |

|            |          |             |       |       |          |     |          |             |
|------------|----------|-------------|-------|-------|----------|-----|----------|-------------|
| MMP71      | 7.10E-87 | 0.82033263  | 0.297 | 0.136 | 1.71E-82 | 1.2 | MMP7     | 2.183823529 |
| SIK31      | 2.88E-86 | 0.426215676 | 0.986 | 0.971 | 6.93E-82 | 1.2 | SIK3     | 1.015447992 |
| PLAUR      | 9.93E-86 | 0.730456546 | 0.347 | 0.176 | 2.40E-81 | 1.2 | PLAUR    | 1.971590909 |
| MAMLD11    | 6.54E-84 | 0.388269508 | 0.111 | 0.027 | 1.58E-79 | 1.2 | MAMLD1   | 4.111111111 |
| RPL36AL1   | 1.89E-83 | 0.433178685 | 0.933 | 0.882 | 4.55E-79 | 1.2 | RPL36AL  | 1.057823129 |
| PTGS2      | 2.93E-83 | 0.472223223 | 0.059 | 0.008 | 7.06E-79 | 1.2 | PTGS2    | 7.375       |
| LAMC2      | 4.00E-83 | 0.809152222 | 0.422 | 0.248 | 9.65E-79 | 1.2 | LAMC2    | 1.701612903 |
| LRRFIP21   | 7.20E-82 | 0.510788551 | 0.856 | 0.753 | 1.74E-77 | 1.2 | LRRFIP2  | 1.136786189 |
| CA8        | 7.58E-82 | 0.695406317 | 0.401 | 0.218 | 1.83E-77 | 1.2 | CA8      | 1.839449541 |
| PAM        | 2.75E-81 | 0.59563144  | 0.626 | 0.451 | 6.64E-77 | 1.2 | PAM      | 1.388026608 |
| IGFBP31    | 8.01E-81 | 0.557281116 | 0.153 | 0.048 | 1.93E-76 | 1.2 | IGFBP3   | 3.1875      |
| DMD1       | 1.84E-80 | 0.700126247 | 0.427 | 0.244 | 4.43E-76 | 1.2 | DMD      | 1.75        |
| CTTNBP2NL1 | 2.25E-80 | 0.54928748  | 0.366 | 0.195 | 5.42E-76 | 1.2 | CTTNBP2N | 1.876923077 |
| SLC20A21   | 4.10E-80 | 0.693900452 | 0.493 | 0.309 | 9.88E-76 | 1.2 | SLC20A2  | 1.595469256 |
| RPS4X1     | 4.62E-80 | 0.330649228 | 0.992 | 0.978 | 1.11E-75 | 1.2 | RPS4X    | 1.014314928 |
| RCC11      | 6.70E-80 | 0.621314103 | 0.436 | 0.257 | 1.62E-75 | 1.2 | RCC1     | 1.696498054 |
| PLEKHA71   | 3.40E-79 | 0.294019482 | 0.988 | 0.979 | 8.20E-75 | 1.2 | PLEKHA7  | 1.009193054 |
| CAV1       | 1.81E-78 | 0.359475771 | 0.101 | 0.024 | 4.36E-74 | 1.2 | CAV1     | 4.208333333 |
| GBE11      | 7.62E-77 | 0.830817156 | 0.519 | 0.343 | 1.84E-72 | 1.2 | GBE1     | 1.513119534 |
| RPL411     | 9.68E-77 | 0.582966405 | 0.951 | 0.898 | 2.33E-72 | 1.2 | RPL41    | 1.059020045 |
| GRB141     | 3.55E-76 | 0.710573349 | 0.564 | 0.393 | 8.55E-72 | 1.2 | GRB14    | 1.435114504 |
| FOSL11     | 1.43E-75 | 0.495867339 | 0.181 | 0.066 | 3.44E-71 | 1.2 | FOSL1    | 2.742424242 |
| ANXA3      | 3.38E-75 | 0.64729075  | 0.522 | 0.345 | 8.15E-71 | 1.2 | ANXA3    | 1.513043478 |
| LOX1       | 8.47E-75 | 0.345318559 | 0.092 | 0.021 | 2.04E-70 | 1.2 | LOX      | 4.380952381 |
| DHFR1      | 1.17E-74 | 0.555963509 | 0.862 | 0.783 | 2.82E-70 | 1.2 | DHFR     | 1.100893997 |
| RPS251     | 3.49E-74 | 0.531515397 | 0.851 | 0.727 | 8.41E-70 | 1.2 | RPS25    | 1.170563961 |
| RPL7A1     | 1.76E-73 | 0.317076949 | 0.985 | 0.955 | 4.24E-69 | 1.2 | RPL7A    | 1.031413613 |
| DNAJC61    | 3.77E-73 | 0.446876739 | 0.153 | 0.052 | 9.08E-69 | 1.2 | DNAJC6   | 2.942307692 |
| PDE8A1     | 4.48E-73 | 0.604637335 | 0.493 | 0.311 | 1.08E-68 | 1.2 | PDE8A    | 1.585209003 |
| CRIM11     | 1.12E-72 | 0.623803043 | 0.596 | 0.424 | 2.70E-68 | 1.2 | CRIM1    | 1.405660377 |
| NKX3-11    | 1.24E-72 | 0.434009574 | 0.137 | 0.043 | 2.99E-68 | 1.2 | NKX3-1   | 3.186046512 |
| RPL391     | 2.49E-72 | 0.450475365 | 0.943 | 0.894 | 6.01E-68 | 1.2 | RPL39    | 1.054809843 |
| TSLP1      | 2.54E-72 | 0.341746294 | 0.112 | 0.031 | 6.13E-68 | 1.2 | TSLP     | 3.612903226 |
| LDHA1      | 1.81E-71 | 0.468451349 | 0.793 | 0.655 | 4.37E-67 | 1.2 | LDHA     | 1.210687023 |
| PPP1R14C1  | 2.32E-71 | 0.488132401 | 0.208 | 0.086 | 5.59E-67 | 1.2 | PPP1R14C | 2.418604651 |
| FMNL2      | 2.41E-71 | 0.650102829 | 0.508 | 0.336 | 5.82E-67 | 1.2 | FMNL2    | 1.511904762 |
| CLMN1      | 3.69E-71 | 0.610824452 | 0.67  | 0.519 | 8.89E-67 | 1.2 | CLMN     | 1.290944123 |
| CAPN2      | 3.84E-71 | 0.59875806  | 0.448 | 0.277 | 9.26E-67 | 1.2 | CAPN2    | 1.61732852  |
| CCDC821    | 5.49E-71 | 0.495897637 | 0.29  | 0.143 | 1.32E-66 | 1.2 | CCDC82   | 2.027972028 |
| MBP        | 6.40E-71 | 0.511868697 | 0.234 | 0.104 | 1.54E-66 | 1.2 | MBP      | 2.25        |
| RPL271     | 1.10E-69 | 0.333173068 | 0.958 | 0.903 | 2.65E-65 | 1.2 | RPL27    | 1.060908084 |
| HSP90AA11  | 1.45E-69 | 0.602136928 | 0.914 | 0.848 | 3.49E-65 | 1.2 | HSP90AA1 | 1.077830189 |
| RASGEF1C1  | 2.28E-69 | 0.322088555 | 0.11  | 0.031 | 5.50E-65 | 1.2 | RASGEF1C | 3.548387097 |
| HS3ST4     | 2.16E-68 | 0.671869451 | 0.328 | 0.174 | 5.22E-64 | 1.2 | HS3ST4   | 1.885057471 |
| INSIG21    | 2.64E-68 | 0.498907818 | 0.358 | 0.197 | 6.38E-64 | 1.2 | INSIG2   | 1.817258883 |
| CDK14      | 1.14E-67 | 0.599926325 | 0.481 | 0.311 | 2.75E-63 | 1.2 | CDK14    | 1.546623794 |
| BAIAP2L11  | 2.34E-67 | 0.318640581 | 0.971 | 0.922 | 5.65E-63 | 1.2 | BAIAP2L1 | 1.053145336 |
| RPS131     | 3.90E-67 | 0.44745786  | 0.84  | 0.689 | 9.40E-63 | 1.2 | RPS13    | 1.2191582   |
| L3MBTL4    | 5.11E-67 | 0.546150684 | 0.313 | 0.163 | 1.23E-62 | 1.2 | L3MBTL4  | 1.920245399 |
| CDK61      | 9.01E-67 | 0.503252364 | 0.251 | 0.118 | 2.17E-62 | 1.2 | CDK6     | 2.127118644 |
| EEF1B21    | 1.03E-66 | 0.398943046 | 0.853 | 0.716 | 2.48E-62 | 1.2 | EEF1B2   | 1.191340782 |
| VIM1       | 2.14E-66 | 0.525016182 | 0.242 | 0.112 | 5.15E-62 | 1.2 | VIM      | 2.160714286 |



|                   |          |             |       |       |          |     |           |             |
|-------------------|----------|-------------|-------|-------|----------|-----|-----------|-------------|
| RPSA1             | 3.88E-66 | 0.36553073  | 0.9   | 0.801 | 9.35E-62 | 1.2 | RPSA      | 1.123595506 |
| TUBB6             | 8.98E-66 | 0.273053369 | 0.095 | 0.025 | 2.17E-61 | 1.2 | TUBB6     | 3.8         |
| TANK1             | 1.24E-65 | 0.508386189 | 0.626 | 0.458 | 3.00E-61 | 1.2 | TANK      | 1.366812227 |
| KLK10             | 1.78E-65 | 0.307540015 | 0.089 | 0.022 | 4.29E-61 | 1.2 | KLK10     | 4.045454545 |
| ANKRD36B          | 1.54E-64 | 0.47533874  | 0.17  | 0.066 | 3.71E-60 | 1.2 | ANKRD36B  | 2.575757576 |
| GPM6B1            | 1.91E-64 | 0.500231233 | 0.242 | 0.113 | 4.60E-60 | 1.2 | GPM6B     | 2.14159292  |
| TOMM71            | 1.96E-64 | 0.369657339 | 0.89  | 0.809 | 4.72E-60 | 1.2 | TOMM7     | 1.100123609 |
| HNRNPA11          | 6.18E-64 | 0.427949759 | 0.862 | 0.748 | 1.49E-59 | 1.2 | HNRNPA1   | 1.152406417 |
| MIR222HG1         | 3.12E-63 | 0.437658418 | 0.139 | 0.048 | 7.51E-59 | 1.2 | MIR222HG  | 2.895833333 |
| RPL371            | 4.75E-63 | 0.33680965  | 0.977 | 0.942 | 1.15E-58 | 1.2 | RPL37     | 1.037154989 |
| ANKRD36           | 9.43E-63 | 0.496590792 | 0.188 | 0.078 | 2.27E-58 | 1.2 | ANKRD36   | 2.41025641  |
| CMTM71            | 1.02E-62 | 0.531151712 | 0.284 | 0.146 | 2.46E-58 | 1.2 | CMTM7     | 1.945205479 |
| HMGA11            | 1.55E-62 | 0.599594949 | 0.182 | 0.075 | 3.75E-58 | 1.2 | HMGA1     | 2.426666667 |
| PLEKHH21          | 2.28E-62 | 0.356331372 | 0.155 | 0.058 | 5.50E-58 | 1.2 | PLEKHH2   | 2.672413793 |
| RBPMS1            | 6.67E-62 | 0.493667839 | 0.783 | 0.647 | 1.61E-57 | 1.2 | RBPMS     | 1.210200927 |
| EFNA5             | 4.09E-61 | 0.532967318 | 0.437 | 0.265 | 9.87E-57 | 1.2 | EFNA5     | 1.649056604 |
| RPS271            | 5.89E-61 | 0.680065437 | 0.753 | 0.625 | 1.42E-56 | 1.2 | RPS27     | 1.2048      |
| KLK71             | 7.53E-61 | 0.231744855 | 0.064 | 0.013 | 1.82E-56 | 1.2 | KLK7      | 4.923076923 |
| PGBD5             | 1.06E-60 | 0.293372823 | 0.108 | 0.033 | 2.55E-56 | 1.2 | PGBD5     | 3.272727273 |
| S100A21           | 1.07E-59 | 0.908101324 | 0.136 | 0.048 | 2.59E-55 | 1.2 | S100A2    | 2.833333333 |
| TBC1D3P1-DHX40P11 | 1.17E-59 | 0.478621391 | 0.72  | 0.575 | 2.82E-55 | 1.2 | TBC1D3P1- | 1.252173913 |
| HADH1             | 1.45E-59 | 0.447403249 | 0.21  | 0.094 | 3.49E-55 | 1.2 | HADH      | 2.234042553 |
| SESTD11           | 2.38E-58 | 0.496254708 | 0.619 | 0.475 | 5.74E-54 | 1.2 | SESTD1    | 1.303157895 |
| TJP21             | 2.61E-58 | 0.610883124 | 0.456 | 0.308 | 6.29E-54 | 1.2 | TJP2      | 1.480519481 |
| NFATC21           | 4.25E-58 | 0.458374471 | 0.191 | 0.082 | 1.03E-53 | 1.2 | NFATC2    | 2.329268293 |
| LINC004861        | 4.38E-58 | 0.255126034 | 0.993 | 0.986 | 1.06E-53 | 1.2 | LINC00486 | 1.007099391 |
| PRNP              | 6.17E-58 | 0.449470698 | 0.224 | 0.105 | 1.49E-53 | 1.2 | PRNP      | 2.133333333 |
| CD59              | 8.83E-58 | 0.486157888 | 0.939 | 0.876 | 2.13E-53 | 1.2 | CD59      | 1.071917808 |
| KIZ-AS11          | 1.62E-57 | 0.485036917 | 0.894 | 0.838 | 3.90E-53 | 1.2 | KIZ-AS1   | 1.066825776 |
| TNFRSF11B         | 1.73E-57 | 0.467725245 | 0.159 | 0.062 | 4.17E-53 | 1.2 | TNFRSF11B | 2.564516129 |
| RPL37A1           | 8.56E-57 | 0.309322609 | 0.989 | 0.973 | 2.06E-52 | 1.2 | RPL37A    | 1.016443988 |
| MECOM1            | 1.28E-56 | 0.396107451 | 0.863 | 0.798 | 3.09E-52 | 1.2 | MECOM     | 1.081453634 |
| BTF31             | 1.46E-56 | 0.289871628 | 0.943 | 0.883 | 3.53E-52 | 1.2 | BTF3      | 1.06795017  |
| TM2D2             | 3.00E-56 | 0.296073518 | 0.121 | 0.041 | 7.22E-52 | 1.2 | TM2D2     | 2.951219512 |
| THUMPD3-AS1       | 4.59E-56 | 0.515305322 | 0.355 | 0.212 | 1.11E-51 | 1.2 | THUMPD3-  | 1.674528302 |
| CLIC41            | 7.62E-56 | 0.514544484 | 0.685 | 0.549 | 1.84E-51 | 1.2 | CLIC4     | 1.247723133 |
| FOXN2             | 7.62E-56 | 0.427310904 | 0.165 | 0.067 | 1.84E-51 | 1.2 | FOXN2     | 2.462686567 |
| GLS               | 1.02E-55 | 0.570388229 | 0.325 | 0.187 | 2.46E-51 | 1.2 | GLS       | 1.737967914 |
| FAM78B            | 1.40E-55 | 0.336094179 | 0.097 | 0.029 | 3.38E-51 | 1.2 | FAM78B    | 3.344827586 |
| SERPINB51         | 2.36E-55 | 0.214347959 | 0.052 | 0.009 | 5.69E-51 | 1.2 | SERPINB5  | 5.777777778 |
| NCOA71            | 3.62E-55 | 0.525594924 | 0.597 | 0.424 | 8.72E-51 | 1.2 | NCOA7     | 1.408018868 |
| KRT16             | 6.66E-55 | 0.314643746 | 0.053 | 0.01  | 1.61E-50 | 1.2 | KRT16     | 5.3         |
| YWHAH1            | 1.00E-54 | 0.484468234 | 0.337 | 0.198 | 2.42E-50 | 1.2 | YWHAH     | 1.702020202 |
| CPAMD81           | 1.35E-54 | 0.413569436 | 0.146 | 0.056 | 3.27E-50 | 1.2 | CPAMD8    | 2.607142857 |
| PRKX              | 1.43E-54 | 0.429582412 | 0.2   | 0.092 | 3.44E-50 | 1.2 | PRKX      | 2.173913043 |
| TPM1              | 1.55E-54 | 0.509029322 | 0.646 | 0.514 | 3.73E-50 | 1.2 | TPM1      | 1.256809339 |
| GALNT31           | 1.13E-53 | 0.517057157 | 0.325 | 0.188 | 2.73E-49 | 1.2 | GALNT3    | 1.728723404 |
| COL6A1            | 1.63E-53 | 0.314284685 | 0.069 | 0.016 | 3.93E-49 | 1.2 | COL6A1    | 4.3125      |
| SAMD4A            | 1.75E-53 | 0.434934704 | 0.752 | 0.611 | 4.21E-49 | 1.2 | SAMD4A    | 1.230769231 |
| SLC39A141         | 2.08E-53 | 0.502125955 | 0.324 | 0.186 | 5.02E-49 | 1.2 | SLC39A14  | 1.741935484 |
| SPATA5            | 2.41E-53 | 0.454428876 | 0.176 | 0.077 | 5.80E-49 | 1.2 | SPATA5    | 2.285714286 |
| UAP1              | 3.35E-53 | 0.49911456  | 0.257 | 0.134 | 8.09E-49 | 1.2 | UAP1      | 1.917910448 |

|               |          |             |       |       |          |     |            |             |
|---------------|----------|-------------|-------|-------|----------|-----|------------|-------------|
| FRMD4A        | 5.93E-53 | 0.488950326 | 0.419 | 0.263 | 1.43E-48 | 1.2 | FRMD4A     | 1.593155894 |
| RPL61         | 1.03E-52 | 0.281867024 | 0.976 | 0.946 | 2.47E-48 | 1.2 | RPL6       | 1.031712474 |
| GPAT31        | 3.58E-52 | 0.285471047 | 0.116 | 0.04  | 8.64E-48 | 1.2 | GPAT3      | 2.9         |
| IFNAR2        | 3.72E-52 | 0.527732822 | 0.315 | 0.184 | 8.96E-48 | 1.2 | IFNAR2     | 1.711956522 |
| LAMB31        | 6.60E-52 | 1.000656629 | 0.353 | 0.229 | 1.59E-47 | 1.2 | LAMB3      | 1.541484716 |
| CHIC21        | 1.05E-51 | 0.450754338 | 0.274 | 0.149 | 2.54E-47 | 1.2 | CHIC2      | 1.838926174 |
| PTCHD11       | 1.14E-51 | 0.286288625 | 0.105 | 0.035 | 2.76E-47 | 1.2 | PTCHD1     | 3           |
| CTC-471J1.91  | 1.76E-51 | 0.476823584 | 0.728 | 0.627 | 4.25E-47 | 1.2 | CTC-471J1. | 1.16108453  |
| LINC00969     | 1.99E-51 | 0.464246623 | 0.33  | 0.195 | 4.80E-47 | 1.2 | LINC00969  | 1.692307692 |
| NUDCD1        | 2.07E-51 | 0.362561285 | 0.168 | 0.072 | 4.98E-47 | 1.2 | NUDCD1     | 2.333333333 |
| DSC31         | 2.75E-51 | 0.291623881 | 0.06  | 0.013 | 6.63E-47 | 1.2 | DSC3       | 4.615384615 |
| SKP11         | 5.43E-51 | 0.438919915 | 0.863 | 0.801 | 1.31E-46 | 1.2 | SKP1       | 1.077403246 |
| CENPW1        | 1.15E-50 | 0.360784385 | 0.154 | 0.064 | 2.78E-46 | 1.2 | CENPW      | 2.40625     |
| TXNRD1        | 2.36E-50 | 0.738172819 | 0.507 | 0.365 | 5.68E-46 | 1.2 | TXNRD1     | 1.389041096 |
| CTSS          | 3.36E-50 | 0.421240167 | 0.244 | 0.127 | 8.11E-46 | 1.2 | CTSS       | 1.921259843 |
| TRAF1         | 3.45E-50 | 0.35433434  | 0.105 | 0.035 | 8.31E-46 | 1.2 | TRAF1      | 3           |
| RPL221        | 1.94E-49 | 0.367818592 | 0.755 | 0.641 | 4.69E-45 | 1.2 | RPL22      | 1.177847114 |
| PLSCR1        | 2.64E-49 | 0.459857352 | 0.31  | 0.182 | 6.38E-45 | 1.2 | PLSCR1     | 1.703296703 |
| SGK1          | 4.11E-49 | 0.441651859 | 0.201 | 0.096 | 9.91E-45 | 1.2 | SGK1       | 2.09375     |
| SH3PXD2A      | 6.27E-49 | 0.456624814 | 0.19  | 0.089 | 1.51E-44 | 1.2 | SH3PXD2A   | 2.134831461 |
| TUBA1C        | 1.08E-48 | 0.480614712 | 0.416 | 0.279 | 2.59E-44 | 1.2 | TUBA1C     | 1.491039427 |
| EPB421        | 1.31E-48 | 0.597192076 | 0.923 | 0.893 | 3.16E-44 | 1.2 | EPB42      | 1.033594625 |
| TPTEP1        | 1.35E-48 | 0.456237211 | 0.266 | 0.145 | 3.25E-44 | 1.2 | TPTEP1     | 1.834482759 |
| PCNXL21       | 7.90E-48 | 0.679346076 | 0.813 | 0.759 | 1.90E-43 | 1.2 | PCNXL2     | 1.071146245 |
| UQCRH1        | 1.31E-47 | 0.335417749 | 0.832 | 0.74  | 3.15E-43 | 1.2 | UQCRH      | 1.124324324 |
| DENND2C       | 2.18E-47 | 0.283397495 | 0.094 | 0.03  | 5.25E-43 | 1.2 | DENND2C    | 3.133333333 |
| BPGM          | 3.38E-47 | 0.421294367 | 0.176 | 0.081 | 8.14E-43 | 1.2 | BPGM       | 2.172839506 |
| TNFRSF11A1    | 4.04E-47 | 0.326749878 | 0.143 | 0.059 | 9.74E-43 | 1.2 | TNFRSF11A  | 2.423728814 |
| FEZ21         | 5.44E-47 | 0.574991247 | 0.462 | 0.328 | 1.31E-42 | 1.2 | FEZ2       | 1.408536585 |
| KRT14         | 6.20E-47 | 0.148655314 | 0.03  | 0.004 | 1.50E-42 | 1.2 | KRT14      | 7.5         |
| TMEM1591      | 6.38E-47 | 0.471710043 | 0.432 | 0.299 | 1.54E-42 | 1.2 | TMEM159    | 1.444816054 |
| SGMS21        | 8.93E-47 | 0.427458969 | 0.213 | 0.106 | 2.15E-42 | 1.2 | SGMS2      | 2.009433962 |
| RP11-66B24.4  | 1.90E-46 | 0.295625655 | 0.1   | 0.034 | 4.59E-42 | 1.2 | RP11-66B2  | 2.941176471 |
| CNIH4         | 2.31E-46 | 0.468340306 | 0.422 | 0.289 | 5.57E-42 | 1.2 | CNIH4      | 1.460207612 |
| RSL1D11       | 3.09E-46 | 0.399202289 | 0.582 | 0.439 | 7.44E-42 | 1.2 | RSL1D1     | 1.325740319 |
| RPL91         | 3.77E-46 | 0.477443819 | 0.666 | 0.56  | 9.09E-42 | 1.2 | RPL9       | 1.189285714 |
| SRRM11        | 3.97E-46 | 0.426509527 | 0.645 | 0.525 | 9.57E-42 | 1.2 | SRRM1      | 1.228571429 |
| ZMYM41        | 1.15E-45 | 0.297613178 | 0.876 | 0.81  | 2.77E-41 | 1.2 | ZMYM4      | 1.081481481 |
| BCAS31        | 1.17E-45 | 0.325425517 | 0.817 | 0.731 | 2.83E-41 | 1.2 | BCAS3      | 1.117647059 |
| MTHFD1L1      | 1.45E-45 | 0.534791913 | 0.329 | 0.206 | 3.49E-41 | 1.2 | MTHFD1L    | 1.597087379 |
| SEMA6A-AS1    | 1.66E-45 | 0.475111619 | 0.23  | 0.12  | 4.01E-41 | 1.2 | SEMA6A-A'  | 1.916666667 |
| RP11-356C4.51 | 1.94E-45 | 0.577390743 | 0.251 | 0.139 | 4.67E-41 | 1.2 | RP11-356C  | 1.805755396 |
| KCTD91        | 2.66E-45 | 0.523791159 | 0.35  | 0.222 | 6.42E-41 | 1.2 | KCTD9      | 1.576576577 |
| NPAS2         | 2.76E-45 | 0.457669649 | 0.505 | 0.359 | 6.66E-41 | 1.2 | NPAS2      | 1.406685237 |
| TMEM271       | 3.04E-45 | 0.197798297 | 0.073 | 0.021 | 7.33E-41 | 1.2 | TMEM27     | 3.476190476 |
| RANBP17       | 3.85E-45 | 0.461956332 | 0.194 | 0.095 | 9.28E-41 | 1.2 | RANBP17    | 2.042105263 |
| TACSTD2       | 7.46E-45 | 0.343034763 | 0.832 | 0.72  | 1.80E-40 | 1.2 | TACSTD2    | 1.155555556 |
| COBL1         | 2.92E-44 | 0.540903325 | 0.471 | 0.328 | 7.05E-40 | 1.2 | COBL       | 1.43597561  |
| RASSF81       | 2.97E-44 | 0.39879818  | 0.196 | 0.097 | 7.17E-40 | 1.2 | RASSF8     | 2.020618557 |
| DDX241        | 4.51E-44 | 0.47006101  | 0.612 | 0.496 | 1.09E-39 | 1.2 | DDX24      | 1.233870968 |
| CYP24A1       | 5.26E-44 | 0.769236559 | 0.208 | 0.106 | 1.27E-39 | 1.2 | CYP24A1    | 1.962264151 |
| BDNF-AS1      | 1.05E-43 | 0.53914614  | 0.629 | 0.493 | 2.54E-39 | 1.2 | BDNF-AS    | 1.275862069 |

|                 |          |             |       |       |          |     |           |             |
|-----------------|----------|-------------|-------|-------|----------|-----|-----------|-------------|
| STEAP1B1        | 1.31E-43 | 0.573674418 | 0.947 | 0.932 | 3.17E-39 | 1.2 | STEAP1B   | 1.016094421 |
| CMPK1           | 1.34E-43 | 0.472450988 | 0.323 | 0.197 | 3.23E-39 | 1.2 | CMPK1     | 1.639593909 |
| RASSF31         | 3.01E-43 | 0.380113277 | 0.218 | 0.113 | 7.26E-39 | 1.2 | RASSF3    | 1.92920354  |
| LINC014921      | 3.13E-43 | 0.311231996 | 0.162 | 0.074 | 7.54E-39 | 1.2 | LINC01492 | 2.189189189 |
| PTPN141         | 3.78E-43 | 0.361579136 | 0.428 | 0.289 | 9.11E-39 | 1.2 | PTPN14    | 1.480968858 |
| LINGO2          | 4.92E-43 | 0.395526617 | 0.087 | 0.029 | 1.19E-38 | 1.2 | LINGO2    | 3           |
| NMB1            | 5.02E-43 | 0.183365942 | 0.055 | 0.013 | 1.21E-38 | 1.2 | NMB       | 4.230769231 |
| C6orf132        | 6.31E-43 | 0.402753735 | 0.256 | 0.143 | 1.52E-38 | 1.2 | C6orf132  | 1.79020979  |
| PTEN1           | 8.80E-43 | 0.525605631 | 0.851 | 0.804 | 2.12E-38 | 1.2 | PTEN      | 1.058457711 |
| BRINP1          | 1.47E-42 | 0.7816635   | 0.191 | 0.095 | 3.55E-38 | 1.2 | BRINP1    | 2.010526316 |
| FAS1            | 1.62E-42 | 0.427710511 | 0.184 | 0.091 | 3.91E-38 | 1.2 | FAS       | 2.021978022 |
| WNT2B           | 2.27E-42 | 0.305361881 | 0.1   | 0.036 | 5.48E-38 | 1.2 | WNT2B     | 2.777777778 |
| XDH1            | 2.37E-42 | 0.442372767 | 0.126 | 0.051 | 5.71E-38 | 1.2 | XDH       | 2.470588235 |
| SON             | 4.76E-42 | 0.548465571 | 0.755 | 0.672 | 1.15E-37 | 1.2 | SON       | 1.123511905 |
| PABPC11         | 7.51E-42 | 0.366597878 | 0.796 | 0.723 | 1.81E-37 | 1.2 | PABPC1    | 1.100968188 |
| GJA11           | 1.01E-41 | 0.255010593 | 0.078 | 0.024 | 2.43E-37 | 1.2 | GJA1      | 3.25        |
| AC004231.2      | 1.31E-41 | 0.293597225 | 0.091 | 0.031 | 3.17E-37 | 1.2 | AC004231. | 2.935483871 |
| ADGRL3-AS11     | 1.42E-41 | 0.486086946 | 0.68  | 0.59  | 3.43E-37 | 1.2 | ADGRL3-AS | 1.152542373 |
| CALU            | 1.61E-41 | 0.444201549 | 0.337 | 0.216 | 3.88E-37 | 1.2 | CALU      | 1.560185185 |
| ADAMTS9-AS1     | 1.75E-41 | 0.177240564 | 0.045 | 0.009 | 4.21E-37 | 1.2 | ADAMTS9-  | 5           |
| CAMK2D1         | 3.43E-41 | 0.483746433 | 0.279 | 0.164 | 8.28E-37 | 1.2 | CAMK2D    | 1.701219512 |
| RRAGD1          | 7.91E-41 | 0.263958231 | 0.116 | 0.046 | 1.91E-36 | 1.2 | RRAGD     | 2.52173913  |
| BACH21          | 1.16E-40 | 0.408714805 | 0.461 | 0.324 | 2.79E-36 | 1.2 | BACH2     | 1.422839506 |
| KRT81           | 1.26E-40 | 0.36453931  | 0.062 | 0.017 | 3.05E-36 | 1.2 | KRT81     | 3.647058824 |
| ARRDC31         | 1.77E-40 | 0.339911228 | 0.525 | 0.37  | 4.27E-36 | 1.2 | ARRDC3    | 1.418918919 |
| RP11-314N13.101 | 1.81E-40 | 0.503506268 | 0.208 | 0.109 | 4.36E-36 | 1.2 | RP11-314N | 1.908256881 |
| HLA-B1          | 4.27E-40 | 0.444221082 | 0.636 | 0.533 | 1.03E-35 | 1.2 | HLA-B     | 1.193245779 |
| NXN1            | 9.63E-40 | 0.355715178 | 0.177 | 0.087 | 2.32E-35 | 1.2 | NXN       | 2.034482759 |
| CCT21           | 1.13E-39 | 0.473620858 | 0.415 | 0.292 | 2.71E-35 | 1.2 | CCT2      | 1.421232877 |
| TLE41           | 1.24E-39 | 0.424802515 | 0.462 | 0.328 | 3.00E-35 | 1.2 | TLE4      | 1.408536585 |
| KPNB11          | 1.25E-39 | 0.436731254 | 0.515 | 0.395 | 3.01E-35 | 1.2 | KPNB1     | 1.303797468 |
| MLLT41          | 2.28E-39 | 0.30449407  | 0.755 | 0.633 | 5.50E-35 | 1.2 | MLLT4     | 1.192733017 |
| VNN1            | 2.86E-39 | 0.53319124  | 0.217 | 0.117 | 6.90E-35 | 1.2 | VNN1      | 1.854700855 |
| SLC35F3         | 4.88E-39 | 0.257763913 | 0.082 | 0.027 | 1.18E-34 | 1.2 | SLC35F3   | 3.037037037 |
| SEMA6A1         | 6.27E-39 | 0.480079883 | 0.336 | 0.211 | 1.51E-34 | 1.2 | SEMA6A    | 1.592417062 |
| ANXA11          | 7.60E-39 | 0.464569605 | 0.353 | 0.232 | 1.83E-34 | 1.2 | ANXA11    | 1.521551724 |
| ACTB            | 8.96E-39 | 0.297442689 | 0.737 | 0.634 | 2.16E-34 | 1.2 | ACTB      | 1.162460568 |
| NACA21          | 1.12E-38 | 0.383796411 | 0.586 | 0.456 | 2.71E-34 | 1.2 | NACA2     | 1.285087719 |
| HMOX1           | 1.22E-38 | 0.483335248 | 0.113 | 0.046 | 2.93E-34 | 1.2 | HMOX1     | 2.456521739 |
| CFL21           | 1.68E-38 | 0.316291922 | 0.148 | 0.068 | 4.06E-34 | 1.2 | CFL2      | 2.176470588 |
| VMP1            | 6.99E-38 | 0.382615019 | 0.801 | 0.742 | 1.69E-33 | 1.2 | VMP1      | 1.079514825 |
| RPS201          | 1.15E-37 | 0.272472723 | 0.955 | 0.921 | 2.76E-33 | 1.2 | RPS20     | 1.036916395 |
| NDRG11          | 2.20E-37 | 0.465515863 | 0.466 | 0.34  | 5.30E-33 | 1.2 | NDRG1     | 1.370588235 |
| ATP13A31        | 2.22E-37 | 0.447695647 | 0.372 | 0.251 | 5.35E-33 | 1.2 | ATP13A3   | 1.482071713 |
| EPS81           | 2.58E-37 | 0.501222586 | 0.431 | 0.309 | 6.23E-33 | 1.2 | EPS8      | 1.394822006 |
| CAV2            | 3.30E-37 | 0.244149445 | 0.098 | 0.038 | 7.96E-33 | 1.2 | CAV2      | 2.578947368 |
| RP11-631N16.2   | 3.70E-37 | 0.250881033 | 0.098 | 0.038 | 8.92E-33 | 1.2 | RP11-631N | 2.578947368 |
| PFDN41          | 5.79E-37 | 0.391386298 | 0.453 | 0.324 | 1.40E-32 | 1.2 | PFDN4     | 1.398148148 |
| CARD161         | 5.89E-37 | 0.239733102 | 0.102 | 0.04  | 1.42E-32 | 1.2 | CARD16    | 2.55        |
| PNN1            | 1.06E-36 | 0.435636338 | 0.429 | 0.313 | 2.56E-32 | 1.2 | PNN       | 1.370607029 |
| ITGB11          | 1.14E-36 | 0.448420483 | 0.448 | 0.326 | 2.76E-32 | 1.2 | ITGB1     | 1.374233129 |
| SLC18B11        | 1.69E-36 | 0.393234923 | 0.186 | 0.097 | 4.08E-32 | 1.2 | SLC18B1   | 1.917525773 |

|                |          |             |       |       |          |     |           |             |
|----------------|----------|-------------|-------|-------|----------|-----|-----------|-------------|
| RPL23A1        | 1.98E-36 | 0.456742845 | 0.684 | 0.564 | 4.77E-32 | 1.2 | RPL23A    | 1.212765957 |
| ABI11          | 2.58E-36 | 0.34813493  | 0.759 | 0.67  | 6.23E-32 | 1.2 | ABI1      | 1.132835821 |
| LINC00342      | 2.84E-36 | 0.251610531 | 0.092 | 0.034 | 6.85E-32 | 1.2 | LINC00342 | 2.705882353 |
| NDRG21         | 3.34E-36 | 0.458652626 | 0.283 | 0.174 | 8.06E-32 | 1.2 | NDRG2     | 1.626436782 |
| ZC3H12C        | 3.41E-36 | 0.382523883 | 0.201 | 0.108 | 8.22E-32 | 1.2 | ZC3H12C   | 1.861111111 |
| EIF3L1         | 4.98E-36 | 0.32635476  | 0.7   | 0.578 | 1.20E-31 | 1.2 | EIF3L     | 1.211072664 |
| FBLIM11        | 1.25E-35 | 0.325177597 | 0.188 | 0.099 | 3.02E-31 | 1.2 | FBLIM1    | 1.898989899 |
| UFM1           | 1.44E-35 | 0.436752333 | 0.432 | 0.314 | 3.48E-31 | 1.2 | UFM1      | 1.375796178 |
| MTRNR2L121     | 1.82E-35 | 0.434045922 | 0.328 | 0.214 | 4.39E-31 | 1.2 | MTRNR2L1  | 1.53271028  |
| RP4-678D15.1   | 1.96E-35 | 0.335075101 | 0.156 | 0.076 | 4.74E-31 | 1.2 | RP4-678D1 | 2.052631579 |
| TMEM217        | 2.02E-35 | 0.291433902 | 0.129 | 0.058 | 4.88E-31 | 1.2 | TMEM217   | 2.224137931 |
| NT5C2          | 2.38E-35 | 0.398267384 | 0.378 | 0.259 | 5.74E-31 | 1.2 | NT5C2     | 1.459459459 |
| CLINT11        | 3.16E-35 | 0.424423221 | 0.354 | 0.238 | 7.61E-31 | 1.2 | CLINT1    | 1.487394958 |
| DAPK11         | 4.79E-35 | 0.519669762 | 0.611 | 0.526 | 1.15E-30 | 1.2 | DAPK1     | 1.161596958 |
| RP11-111E14.11 | 5.87E-35 | 0.20048736  | 0.075 | 0.025 | 1.42E-30 | 1.2 | RP11-111E | 3           |
| KANK1          | 5.98E-35 | 0.40126924  | 0.252 | 0.15  | 1.44E-30 | 1.2 | KANK1     | 1.68        |
| CORO1C1        | 8.40E-35 | 0.344477253 | 0.291 | 0.179 | 2.03E-30 | 1.2 | CORO1C    | 1.625698324 |
| MORF4L11       | 9.21E-35 | 0.350890834 | 0.71  | 0.623 | 2.22E-30 | 1.2 | MORF4L1   | 1.13964687  |
| COL22A1        | 1.09E-34 | 0.167378219 | 0.051 | 0.014 | 2.64E-30 | 1.2 | COL22A1   | 3.642857143 |
| RP11-795H16.31 | 1.14E-34 | 0.500986701 | 0.458 | 0.352 | 2.76E-30 | 1.2 | RP11-795H | 1.301136364 |
| SPOCD1         | 1.84E-34 | 0.119255566 | 0.036 | 0.007 | 4.45E-30 | 1.2 | SPOCD1    | 5.142857143 |
| COG5           | 2.24E-34 | 0.43788392  | 0.543 | 0.437 | 5.40E-30 | 1.2 | COG5      | 1.242562929 |
| ALPL1          | 2.51E-34 | 0.280203434 | 0.075 | 0.026 | 6.06E-30 | 1.2 | ALPL      | 2.884615385 |
| GSAP           | 3.17E-34 | 0.345946291 | 0.165 | 0.084 | 7.65E-30 | 1.2 | GSAP      | 1.964285714 |
| PITPNC1        | 3.33E-34 | 0.583127552 | 0.265 | 0.165 | 8.02E-30 | 1.2 | PITPNC1   | 1.606060606 |
| B3GNT51        | 9.16E-34 | 0.250440951 | 0.117 | 0.051 | 2.21E-29 | 1.2 | B3GNT5    | 2.294117647 |
| GBP11          | 1.05E-33 | 0.293330203 | 0.179 | 0.093 | 2.52E-29 | 1.2 | GBP1      | 1.924731183 |
| RP5-945F2.31   | 1.42E-33 | 0.310196217 | 0.096 | 0.038 | 3.43E-29 | 1.2 | RP5-945F2 | 2.526315789 |
| AMOTL11        | 1.62E-33 | 0.273999273 | 0.1   | 0.041 | 3.90E-29 | 1.2 | AMOTL1    | 2.43902439  |
| SLCO3A1        | 1.71E-33 | 0.457513541 | 0.28  | 0.176 | 4.13E-29 | 1.2 | SLCO3A1   | 1.590909091 |
| IFI16          | 1.77E-33 | 0.321328298 | 0.222 | 0.126 | 4.28E-29 | 1.2 | IFI16     | 1.761904762 |
| ADAM91         | 2.46E-33 | 0.340541607 | 0.668 | 0.558 | 5.94E-29 | 1.2 | ADAM9     | 1.197132616 |
| ZRANB2         | 3.03E-33 | 0.375447371 | 0.332 | 0.222 | 7.30E-29 | 1.2 | ZRANB2    | 1.495495495 |
| CCNB1IP11      | 6.30E-33 | 0.367825449 | 0.355 | 0.243 | 1.52E-28 | 1.2 | CCNB1IP1  | 1.46090535  |
| MT-ND41        | 6.44E-33 | 0.243935422 | 0.994 | 0.994 | 1.55E-28 | 1.2 | MT-ND4    | 1           |
| GPR87          | 7.09E-33 | 0.226995443 | 0.071 | 0.024 | 1.71E-28 | 1.2 | GPR87     | 2.958333333 |
| MTM1           | 7.55E-33 | 0.399668204 | 0.277 | 0.175 | 1.82E-28 | 1.2 | MTM1      | 1.582857143 |
| GRIN2A         | 9.17E-33 | 0.424120795 | 0.109 | 0.047 | 2.21E-28 | 1.2 | GRIN2A    | 2.319148936 |
| NHSL2          | 1.22E-32 | 0.404178291 | 0.379 | 0.27  | 2.94E-28 | 1.2 | NHSL2     | 1.403703704 |
| GTPBP4         | 1.87E-32 | 0.349674742 | 0.186 | 0.101 | 4.51E-28 | 1.2 | GTPBP4    | 1.841584158 |
| LIF            | 1.92E-32 | 0.23459222  | 0.056 | 0.017 | 4.62E-28 | 1.2 | LIF       | 3.294117647 |
| FRAS1          | 2.85E-32 | 0.293366821 | 0.088 | 0.034 | 6.88E-28 | 1.2 | FRAS1     | 2.588235294 |
| TES1           | 2.88E-32 | 0.367876288 | 0.417 | 0.3   | 6.95E-28 | 1.2 | TES       | 1.39        |
| CCT51          | 3.05E-32 | 0.492735287 | 0.391 | 0.287 | 7.35E-28 | 1.2 | CCT5      | 1.362369338 |
| PLAGL11        | 1.51E-31 | 0.214508515 | 0.089 | 0.035 | 3.64E-27 | 1.2 | PLAGL1    | 2.542857143 |
| PLEKHG11       | 1.83E-31 | 0.388968037 | 0.178 | 0.096 | 4.42E-27 | 1.2 | PLEKHG1   | 1.854166667 |
| LIMS11         | 2.26E-31 | 0.407129421 | 0.342 | 0.234 | 5.46E-27 | 1.2 | LIMS1     | 1.461538462 |
| GSTA11         | 2.77E-31 | 0.442223012 | 0.091 | 0.037 | 6.67E-27 | 1.2 | GSTA1     | 2.459459459 |
| SEC24A1        | 3.99E-31 | 0.321175066 | 0.268 | 0.166 | 9.63E-27 | 1.2 | SEC24A    | 1.614457831 |
| FSTL1          | 4.00E-31 | 0.253828393 | 0.136 | 0.066 | 9.64E-27 | 1.2 | FSTL1     | 2.060606061 |
| RBM8A          | 4.50E-31 | 0.376802767 | 0.529 | 0.42  | 1.08E-26 | 1.2 | RBM8A     | 1.25952381  |
| ZDHHC91        | 6.65E-31 | 0.286988723 | 0.161 | 0.084 | 1.60E-26 | 1.2 | ZDHHC9    | 1.916666667 |

|               |          |             |       |       |          |     |             |             |
|---------------|----------|-------------|-------|-------|----------|-----|-------------|-------------|
| DEFB1         | 7.35E-31 | 0.740134379 | 0.55  | 0.428 | 1.77E-26 | 1.2 | DEFB1       | 1.285046729 |
| PSMB71        | 1.04E-30 | 0.407116031 | 0.546 | 0.443 | 2.51E-26 | 1.2 | PSMB7       | 1.232505643 |
| RPL381        | 1.18E-30 | 0.237234786 | 0.922 | 0.889 | 2.85E-26 | 1.2 | RPL38       | 1.03712036  |
| GCLM          | 2.83E-30 | 0.42220649  | 0.231 | 0.141 | 6.82E-26 | 1.2 | GCLM        | 1.638297872 |
| TNFRSF81      | 2.91E-30 | 0.315792893 | 0.161 | 0.085 | 7.03E-26 | 1.2 | TNFRSF8     | 1.894117647 |
| RBFOX21       | 3.03E-30 | 0.328111074 | 0.969 | 0.95  | 7.31E-26 | 1.2 | RBFOX2      | 1.02        |
| MFGE8         | 3.23E-30 | 0.474080164 | 0.167 | 0.089 | 7.79E-26 | 1.2 | MFGE8       | 1.876404494 |
| IPO51         | 3.82E-30 | 0.301042557 | 0.182 | 0.1   | 9.20E-26 | 1.2 | IPO5        | 1.82        |
| SNRPD11       | 3.96E-30 | 0.365988204 | 0.387 | 0.275 | 9.54E-26 | 1.2 | SNRPD1      | 1.407272727 |
| NUDT6         | 5.15E-30 | 0.143114    | 0.044 | 0.012 | 1.24E-25 | 1.2 | NUDT6       | 3.666666667 |
| SMC51         | 5.76E-30 | 0.374238241 | 0.408 | 0.295 | 1.39E-25 | 1.2 | SMC5        | 1.383050847 |
| KIAA0226L1    | 9.32E-30 | 0.238719583 | 0.104 | 0.046 | 2.25E-25 | 1.2 | KIAA0226L   | 2.260869565 |
| PFDN51        | 2.55E-29 | 0.24328977  | 0.887 | 0.842 | 6.16E-25 | 1.2 | PFDN5       | 1.053444181 |
| DTNB          | 5.29E-29 | 0.386622813 | 0.53  | 0.417 | 1.28E-24 | 1.2 | DTNB        | 1.270983213 |
| KLF51         | 6.29E-29 | 0.327776405 | 0.251 | 0.157 | 1.52E-24 | 1.2 | KLF5        | 1.598726115 |
| DNTTIP2       | 6.81E-29 | 0.383619045 | 0.252 | 0.161 | 1.64E-24 | 1.2 | DNTTIP2     | 1.565217391 |
| SAR1B1        | 6.83E-29 | 0.337990691 | 0.478 | 0.362 | 1.65E-24 | 1.2 | SAR1B       | 1.320441989 |
| PID11         | 9.02E-29 | 0.376871504 | 0.139 | 0.07  | 2.17E-24 | 1.2 | PID1        | 1.985714286 |
| RPS291        | 2.03E-28 | 0.251883489 | 0.969 | 0.92  | 4.90E-24 | 1.2 | RPS29       | 1.05326087  |
| CXCL16        | 2.50E-28 | 0.295589487 | 0.221 | 0.133 | 6.04E-24 | 1.2 | CXCL16      | 1.661654135 |
| EIF3M1        | 2.81E-28 | 0.323147609 | 0.433 | 0.322 | 6.77E-24 | 1.2 | EIF3M       | 1.344720497 |
| IGF2BP2-AS11  | 3.67E-28 | 0.162924863 | 0.058 | 0.019 | 8.84E-24 | 1.2 | IGF2BP2-AS1 | 3.052631579 |
| RAB8B1        | 4.18E-28 | 0.368039319 | 0.225 | 0.139 | 1.01E-23 | 1.2 | RAB8B       | 1.618705036 |
| RIC31         | 5.20E-28 | 0.463957915 | 0.11  | 0.052 | 1.25E-23 | 1.2 | RIC3        | 2.115384615 |
| NEURL3        | 5.34E-28 | 0.221675063 | 0.071 | 0.027 | 1.29E-23 | 1.2 | NEURL3      | 2.62962963  |
| AC008074.3    | 5.45E-28 | 0.246798987 | 0.101 | 0.045 | 1.32E-23 | 1.2 | AC008074.3  | 2.244444444 |
| CTD-2020K17.1 | 5.68E-28 | 0.127949401 | 0.037 | 0.009 | 1.37E-23 | 1.2 | CTD-2020K   | 4.111111111 |
| HDAC7         | 6.42E-28 | 0.316713746 | 0.167 | 0.091 | 1.55E-23 | 1.2 | HDAC7       | 1.835164835 |
| SRSF31        | 7.09E-28 | 0.511720594 | 0.522 | 0.424 | 1.71E-23 | 1.2 | SRSF3       | 1.231132075 |
| ZNF83         | 8.83E-28 | 0.477224954 | 0.401 | 0.305 | 2.13E-23 | 1.2 | ZNF83       | 1.314754098 |
| TBCA1         | 9.18E-28 | 0.325605829 | 0.631 | 0.535 | 2.21E-23 | 1.2 | TBCA        | 1.179439252 |
| CCDC146       | 1.26E-27 | 0.35805964  | 0.216 | 0.131 | 3.04E-23 | 1.2 | CCDC146     | 1.648854962 |
| ARF41         | 1.26E-27 | 0.341949772 | 0.694 | 0.612 | 3.05E-23 | 1.2 | ARF4        | 1.133986928 |
| SMURF21       | 1.54E-27 | 0.403707571 | 0.383 | 0.282 | 3.71E-23 | 1.2 | SMURF2      | 1.358156028 |
| KCNH8         | 1.84E-27 | 0.219148261 | 0.061 | 0.021 | 4.43E-23 | 1.2 | KCNH8       | 2.904761905 |
| PSG41         | 1.92E-27 | 0.157678337 | 0.054 | 0.017 | 4.64E-23 | 1.2 | PSG4        | 3.176470588 |
| MCFD2         | 3.30E-27 | 0.287963581 | 0.204 | 0.121 | 7.96E-23 | 1.2 | MCFD2       | 1.685950413 |
| FAM134B       | 6.23E-27 | 0.3274891   | 0.161 | 0.089 | 1.50E-22 | 1.2 | FAM134B     | 1.808988764 |
| CH17-80A12.1  | 7.76E-27 | 0.123373401 | 0.032 | 0.007 | 1.87E-22 | 1.2 | CH17-80A1   | 4.571428571 |
| MYC1          | 8.34E-27 | 0.323168057 | 0.181 | 0.103 | 2.01E-22 | 1.2 | MYC         | 1.757281553 |
| SYNPO21       | 1.12E-26 | 0.388816877 | 0.169 | 0.094 | 2.69E-22 | 1.2 | SYNPO2      | 1.79787234  |
| ZFAND11       | 1.17E-26 | 0.3332465   | 0.266 | 0.175 | 2.82E-22 | 1.2 | ZFAND1      | 1.52        |
| SF3B61        | 1.22E-26 | 0.372495323 | 0.673 | 0.602 | 2.94E-22 | 1.2 | SF3B6       | 1.117940199 |
| ACTN41        | 1.33E-26 | 0.459408405 | 0.367 | 0.265 | 3.20E-22 | 1.2 | ACTN4       | 1.38490566  |
| IL20          | 1.43E-26 | 0.183950487 | 0.027 | 0.005 | 3.45E-22 | 1.2 | IL20        | 5.4         |
| BARX21        | 2.24E-26 | 0.430211146 | 0.342 | 0.242 | 5.41E-22 | 1.2 | BARX2       | 1.41322314  |
| SMARCA1       | 2.91E-26 | 0.277042644 | 0.181 | 0.104 | 7.02E-22 | 1.2 | SMARCA1     | 1.740384615 |
| PNRC1         | 3.01E-26 | 0.383420027 | 0.508 | 0.409 | 7.27E-22 | 1.2 | PNRC1       | 1.24205379  |
| BNIP31        | 4.63E-26 | 0.277402118 | 0.156 | 0.085 | 1.12E-21 | 1.2 | BNIP3       | 1.835294118 |
| ATP6V1B2      | 5.31E-26 | 0.297341024 | 0.149 | 0.08  | 1.28E-21 | 1.2 | ATP6V1B2    | 1.8625      |
| TFCP2L11      | 5.77E-26 | 0.371010288 | 0.155 | 0.085 | 1.39E-21 | 1.2 | TFCP2L1     | 1.823529412 |
| SNRPB21       | 5.78E-26 | 0.376267853 | 0.433 | 0.336 | 1.39E-21 | 1.2 | SNRPB2      | 1.288690476 |

|                |          |             |       |       |          |     |            |             |
|----------------|----------|-------------|-------|-------|----------|-----|------------|-------------|
| GARS           | 6.63E-26 | 0.348808977 | 0.263 | 0.171 | 1.60E-21 | 1.2 | GARS       | 1.538011696 |
| COTL1          | 8.01E-26 | 0.180097746 | 0.066 | 0.025 | 1.93E-21 | 1.2 | COTL1      | 2.64        |
| S100A11        | 1.50E-25 | 0.224495454 | 0.083 | 0.036 | 3.62E-21 | 1.2 | S100A1     | 2.305555556 |
| RP11-286E11.11 | 1.60E-25 | 0.194564533 | 0.076 | 0.031 | 3.86E-21 | 1.2 | RP11-286E  | 2.451612903 |
| PDCD10         | 2.09E-25 | 0.369899322 | 0.34  | 0.244 | 5.04E-21 | 1.2 | PDCD10     | 1.393442623 |
| NEAT1          | 2.59E-25 | 0.154923218 | 0.986 | 0.943 | 6.25E-21 | 1.2 | NEAT1      | 1.045599152 |
| MFHAS1         | 2.78E-25 | 0.213047292 | 0.075 | 0.03  | 6.70E-21 | 1.2 | MFHAS1     | 2.5         |
| BRK11          | 3.36E-25 | 0.302355358 | 0.681 | 0.599 | 8.11E-21 | 1.2 | BRK1       | 1.136894825 |
| SORBS21        | 3.37E-25 | 0.468209858 | 0.476 | 0.37  | 8.12E-21 | 1.2 | SORBS2     | 1.286486486 |
| COX7A2L1       | 5.74E-25 | 0.307300679 | 0.582 | 0.491 | 1.38E-20 | 1.2 | COX7A2L    | 1.185336049 |
| RNF1221        | 7.30E-25 | 0.162089949 | 0.077 | 0.032 | 1.76E-20 | 1.2 | RNF122     | 2.40625     |
| NCMAP1         | 7.49E-25 | 0.291971061 | 0.089 | 0.04  | 1.81E-20 | 1.2 | NCMAP      | 2.225       |
| SAV1           | 7.70E-25 | 0.36181009  | 0.382 | 0.287 | 1.86E-20 | 1.2 | SAV1       | 1.331010453 |
| PDP1           | 8.02E-25 | 0.242889255 | 0.11  | 0.054 | 1.94E-20 | 1.2 | PDP1       | 2.037037037 |
| CHD9           | 9.85E-25 | 0.32829515  | 0.494 | 0.393 | 2.37E-20 | 1.2 | CHD9       | 1.256997455 |
| HSD17B61       | 1.08E-24 | 0.34006815  | 0.048 | 0.015 | 2.59E-20 | 1.2 | HSD17B6    | 3.2         |
| KRT17          | 1.16E-24 | 0.263123122 | 0.063 | 0.023 | 2.79E-20 | 1.2 | KRT17      | 2.739130435 |
| EXT11          | 1.46E-24 | 0.488149791 | 0.571 | 0.49  | 3.51E-20 | 1.2 | EXT1       | 1.165306122 |
| ADGRA3         | 1.69E-24 | 0.306058537 | 0.139 | 0.075 | 4.07E-20 | 1.2 | ADGRA3     | 1.853333333 |
| GPC5           | 2.21E-24 | 0.32074832  | 0.078 | 0.033 | 5.33E-20 | 1.2 | GPC5       | 2.363636364 |
| ENO21          | 2.84E-24 | 0.171620258 | 0.093 | 0.042 | 6.85E-20 | 1.2 | ENO2       | 2.214285714 |
| P3H21          | 4.06E-24 | 0.299175535 | 0.121 | 0.062 | 9.78E-20 | 1.2 | P3H2       | 1.951612903 |
| FAM49B         | 7.07E-24 | 0.284167739 | 0.287 | 0.196 | 1.71E-19 | 1.2 | FAM49B     | 1.464285714 |
| SNHG81         | 7.76E-24 | 0.315275536 | 0.312 | 0.218 | 1.87E-19 | 1.2 | SNHG8      | 1.431192661 |
| ACTR31         | 1.29E-23 | 0.317632895 | 0.359 | 0.263 | 3.11E-19 | 1.2 | ACTR3      | 1.365019011 |
| SNHG121        | 2.18E-23 | 0.189813758 | 0.089 | 0.04  | 5.25E-19 | 1.2 | SNHG12     | 2.225       |
| AC129778.2     | 2.20E-23 | 0.104844756 | 0.029 | 0.007 | 5.29E-19 | 1.2 | AC129778.  | 4.142857143 |
| BLZF1          | 3.71E-23 | 0.272174646 | 0.142 | 0.079 | 8.93E-19 | 1.2 | BLZF1      | 1.797468354 |
| UGP2           | 5.44E-23 | 0.298985855 | 0.522 | 0.427 | 1.31E-18 | 1.2 | UGP2       | 1.222482436 |
| RP5-896L10.11  | 5.74E-23 | 0.28257157  | 0.314 | 0.222 | 1.38E-18 | 1.2 | RP5-896L10 | 1.414414414 |
| IRS2           | 5.86E-23 | 0.297051902 | 0.414 | 0.313 | 1.41E-18 | 1.2 | IRS2       | 1.322683706 |
| CBLC           | 7.27E-23 | 0.24243902  | 0.119 | 0.061 | 1.75E-18 | 1.2 | CBLC       | 1.950819672 |
| CLDN16         | 9.03E-23 | 0.132858579 | 0.05  | 0.017 | 2.18E-18 | 1.2 | CLDN16     | 2.941176471 |
| FOXC11         | 1.32E-22 | 0.1741942   | 0.077 | 0.034 | 3.18E-18 | 1.2 | FOXC1      | 2.264705882 |
| LRRC49         | 1.48E-22 | 0.322159336 | 0.135 | 0.074 | 3.56E-18 | 1.2 | LRRC49     | 1.824324324 |
| PSMA31         | 1.54E-22 | 0.354795573 | 0.423 | 0.33  | 3.72E-18 | 1.2 | PSMA3      | 1.281818182 |
| ZNF8271        | 1.60E-22 | 0.255036294 | 0.18  | 0.108 | 3.86E-18 | 1.2 | ZNF827     | 1.666666667 |
| PDE9A          | 1.67E-22 | 0.177859505 | 0.082 | 0.036 | 4.02E-18 | 1.2 | PDE9A      | 2.277777778 |
| NHSL11         | 1.86E-22 | 0.550056817 | 0.25  | 0.17  | 4.49E-18 | 1.2 | NHSL1      | 1.470588235 |
| SAA2-SAA4      | 2.03E-22 | 0.252859756 | 0.267 | 0.174 | 4.89E-18 | 1.2 | SAA2-SAA4  | 1.534482759 |
| CEACAM1        | 2.10E-22 | 0.310007645 | 0.131 | 0.072 | 5.06E-18 | 1.2 | CEACAM1    | 1.819444444 |
| TAX1BP1        | 2.31E-22 | 0.280948049 | 0.679 | 0.619 | 5.56E-18 | 1.2 | TAX1BP1    | 1.096930533 |
| SACS           | 2.39E-22 | 0.184747324 | 0.107 | 0.054 | 5.76E-18 | 1.2 | SACS       | 1.981481481 |
| TRIM21         | 2.49E-22 | 0.280232143 | 0.247 | 0.164 | 6.01E-18 | 1.2 | TRIM2      | 1.506097561 |
| HPCAL1         | 2.51E-22 | 0.290520525 | 0.145 | 0.081 | 6.06E-18 | 1.2 | HPCAL1     | 1.790123457 |
| FBXO281        | 2.59E-22 | 0.324742779 | 0.225 | 0.147 | 6.23E-18 | 1.2 | FBXO28     | 1.530612245 |
| ZDHHC13        | 2.67E-22 | 0.245102974 | 0.134 | 0.073 | 6.44E-18 | 1.2 | ZDHHC13    | 1.835616438 |
| IL341          | 3.17E-22 | 0.386834783 | 0.137 | 0.076 | 7.64E-18 | 1.2 | IL34       | 1.802631579 |
| CLIP2          | 3.24E-22 | 0.302537254 | 0.202 | 0.127 | 7.81E-18 | 1.2 | CLIP2      | 1.590551181 |
| GNA121         | 3.60E-22 | 0.365774103 | 0.379 | 0.292 | 8.67E-18 | 1.2 | GNA12      | 1.297945205 |
| CHORDC1        | 3.61E-22 | 0.280572421 | 0.134 | 0.074 | 8.70E-18 | 1.2 | CHORDC1    | 1.810810811 |
| DIAPH31        | 3.61E-22 | 0.230452642 | 0.128 | 0.069 | 8.71E-18 | 1.2 | DIAPH3     | 1.855072464 |

|              |          |             |       |       |          |     |           |             |
|--------------|----------|-------------|-------|-------|----------|-----|-----------|-------------|
| FGFBP1       | 5.17E-22 | 0.26316282  | 0.075 | 0.032 | 1.25E-17 | 1.2 | FGFBP1    | 2.34375     |
| PLS3         | 5.50E-22 | 0.208093207 | 0.164 | 0.095 | 1.33E-17 | 1.2 | PLS3      | 1.726315789 |
| ZCCHC21      | 6.62E-22 | 0.443173826 | 0.307 | 0.222 | 1.60E-17 | 1.2 | ZCCHC2    | 1.382882883 |
| C3           | 7.89E-22 | 0.23346258  | 0.219 | 0.14  | 1.90E-17 | 1.2 | C3        | 1.564285714 |
| KRT51        | 9.49E-22 | 0.131865674 | 0.04  | 0.012 | 2.29E-17 | 1.2 | KRT5      | 3.333333333 |
| NFIB         | 1.26E-21 | 0.372300002 | 0.788 | 0.736 | 3.03E-17 | 1.2 | NFIB      | 1.070652174 |
| EIF2A1       | 2.11E-21 | 0.27690749  | 0.397 | 0.302 | 5.08E-17 | 1.2 | EIF2A     | 1.314569536 |
| POU5F1       | 2.36E-21 | 0.117202122 | 0.036 | 0.01  | 5.69E-17 | 1.2 | POU5F1    | 3.6         |
| CEPT1        | 2.85E-21 | 0.288792963 | 0.254 | 0.172 | 6.86E-17 | 1.2 | CEPT1     | 1.476744186 |
| ERC1         | 3.00E-21 | 0.340271009 | 0.361 | 0.272 | 7.24E-17 | 1.2 | ERC1      | 1.327205882 |
| EHBP1        | 3.77E-21 | 0.388739201 | 0.323 | 0.236 | 9.08E-17 | 1.2 | EHBP1     | 1.368644068 |
| FYN1         | 5.11E-21 | 0.128614352 | 0.059 | 0.023 | 1.23E-16 | 1.2 | FYN       | 2.565217391 |
| RIF11        | 5.19E-21 | 0.315801289 | 0.304 | 0.218 | 1.25E-16 | 1.2 | RIF1      | 1.394495413 |
| DUSP141      | 5.26E-21 | 0.182266741 | 0.063 | 0.026 | 1.27E-16 | 1.2 | DUSP14    | 2.423076923 |
| PDLIM7       | 5.45E-21 | 0.119834683 | 0.052 | 0.019 | 1.32E-16 | 1.2 | PDLIM7    | 2.736842105 |
| MT-ND4L1     | 5.79E-21 | 0.375560162 | 0.519 | 0.448 | 1.40E-16 | 1.2 | MT-ND4L   | 1.158482143 |
| CFLAR-AS1    | 5.83E-21 | 0.220008256 | 0.094 | 0.046 | 1.41E-16 | 1.2 | CFLAR-AS1 | 2.043478261 |
| AK6          | 5.88E-21 | 0.289064955 | 0.239 | 0.159 | 1.42E-16 | 1.2 | AK6       | 1.503144654 |
| COPS21       | 6.11E-21 | 0.296534007 | 0.339 | 0.251 | 1.47E-16 | 1.2 | COPS2     | 1.35059761  |
| PHACTR41     | 7.22E-21 | 0.333534296 | 0.41  | 0.323 | 1.74E-16 | 1.2 | PHACTR4   | 1.269349845 |
| NFE2L3       | 7.50E-21 | 0.365859688 | 0.139 | 0.079 | 1.81E-16 | 1.2 | NFE2L3    | 1.759493671 |
| MTRNR2L13    | 7.63E-21 | 0.279749951 | 0.177 | 0.109 | 1.84E-16 | 1.2 | MTRNR2L1  | 1.623853211 |
| SSR21        | 9.31E-21 | 0.249957313 | 0.738 | 0.681 | 2.24E-16 | 1.2 | SSR2      | 1.083700441 |
| LINC011981   | 9.59E-21 | 0.278691756 | 0.225 | 0.146 | 2.31E-16 | 1.2 | LINC01198 | 1.54109589  |
| SYNJ2        | 9.71E-21 | 0.348813139 | 0.303 | 0.219 | 2.34E-16 | 1.2 | SYNJ2     | 1.383561644 |
| PPIA1        | 1.14E-20 | 0.22798113  | 0.832 | 0.802 | 2.74E-16 | 1.2 | PPIA      | 1.037406484 |
| PRSS81       | 1.19E-20 | 0.287966247 | 0.081 | 0.038 | 2.86E-16 | 1.2 | PRSS8     | 2.131578947 |
| SCD51        | 1.22E-20 | 0.203653014 | 0.078 | 0.036 | 2.94E-16 | 1.2 | SCD5      | 2.166666667 |
| PVT11        | 1.56E-20 | 0.446532323 | 0.422 | 0.338 | 3.77E-16 | 1.2 | PVT1      | 1.24852071  |
| CTD-3252C9.4 | 1.58E-20 | 0.212653127 | 0.123 | 0.067 | 3.82E-16 | 1.2 | CTD-3252C | 1.835820896 |
| PRELID3B     | 1.85E-20 | 0.282128237 | 0.318 | 0.233 | 4.47E-16 | 1.2 | PRELID3B  | 1.364806867 |
| MAP4K51      | 1.90E-20 | 0.317779613 | 0.37  | 0.278 | 4.57E-16 | 1.2 | MAP4K5    | 1.330935252 |
| ALOX5        | 1.90E-20 | 0.276045678 | 0.17  | 0.104 | 4.59E-16 | 1.2 | ALOX5     | 1.634615385 |
| KCNQ51       | 2.20E-20 | 0.292813369 | 0.093 | 0.046 | 5.31E-16 | 1.2 | KCNQ5     | 2.02173913  |
| CYCS1        | 2.60E-20 | 0.336302552 | 0.586 | 0.515 | 6.28E-16 | 1.2 | CYCS      | 1.137864078 |
| KIF1B1       | 2.79E-20 | 0.393461053 | 0.484 | 0.397 | 6.72E-16 | 1.2 | KIF1B     | 1.219143577 |
| IAH1         | 3.48E-20 | 0.287041605 | 0.171 | 0.105 | 8.39E-16 | 1.2 | IAH1      | 1.628571429 |
| PITPNB       | 3.53E-20 | 0.299140078 | 0.392 | 0.302 | 8.50E-16 | 1.2 | PITPNB    | 1.298013245 |
| CALCOCO21    | 3.86E-20 | 0.313345288 | 0.327 | 0.245 | 9.30E-16 | 1.2 | CALCOCO2  | 1.334693878 |
| SET1         | 4.36E-20 | 0.380199828 | 0.482 | 0.402 | 1.05E-15 | 1.2 | SET       | 1.199004975 |
| KIF13B1      | 4.46E-20 | 0.350223891 | 0.336 | 0.25  | 1.07E-15 | 1.2 | KIF13B    | 1.344       |
| MPZL11       | 4.71E-20 | 0.32419838  | 0.455 | 0.367 | 1.13E-15 | 1.2 | MPZL1     | 1.239782016 |
| HSD11B1      | 5.44E-20 | 0.277250142 | 0.154 | 0.091 | 1.31E-15 | 1.2 | HSD11B1   | 1.692307692 |
| UBA521       | 5.46E-20 | 0.169064703 | 0.952 | 0.915 | 1.32E-15 | 1.2 | UBA52     | 1.040437158 |
| SPIRE11      | 5.83E-20 | 0.285487676 | 0.334 | 0.245 | 1.41E-15 | 1.2 | SPIRE1    | 1.363265306 |
| RGS10        | 6.06E-20 | 0.218394043 | 0.112 | 0.06  | 1.46E-15 | 1.2 | RGS10     | 1.866666667 |
| RAP2B1       | 7.19E-20 | 0.241558851 | 0.255 | 0.174 | 1.73E-15 | 1.2 | RAP2B     | 1.465517241 |
| ATP2B4       | 8.02E-20 | 0.38569     | 0.435 | 0.351 | 1.93E-15 | 1.2 | ATP2B4    | 1.239316239 |
| TBC1D22B1    | 1.03E-19 | 0.296105008 | 0.235 | 0.159 | 2.49E-15 | 1.2 | TBC1D22B  | 1.477987421 |
| CDC421       | 1.27E-19 | 0.24632268  | 0.772 | 0.711 | 3.06E-15 | 1.2 | CDC42     | 1.085794655 |
| NCAM1        | 1.35E-19 | 0.179298135 | 0.049 | 0.018 | 3.25E-15 | 1.2 | NCAM1     | 2.722222222 |
| FAM129B      | 1.46E-19 | 0.304007095 | 0.15  | 0.089 | 3.51E-15 | 1.2 | FAM129B   | 1.685393258 |

|                |          |             |       |       |          |     |           |             |
|----------------|----------|-------------|-------|-------|----------|-----|-----------|-------------|
| CCT81          | 1.57E-19 | 0.317792223 | 0.357 | 0.275 | 3.78E-15 | 1.2 | CCT8      | 1.298181818 |
| RECK1          | 1.86E-19 | 0.161466323 | 0.059 | 0.024 | 4.47E-15 | 1.2 | RECK      | 2.458333333 |
| C5orf28        | 1.93E-19 | 0.264807    | 0.19  | 0.122 | 4.65E-15 | 1.2 | C5orf28   | 1.557377049 |
| BID            | 2.71E-19 | 0.282652451 | 0.196 | 0.127 | 6.55E-15 | 1.2 | BID       | 1.543307087 |
| DNTTIP1        | 3.04E-19 | 0.18730806  | 0.088 | 0.044 | 7.32E-15 | 1.2 | DNTTIP1   | 2           |
| EPPK1          | 3.64E-19 | 0.209661947 | 0.098 | 0.05  | 8.79E-15 | 1.2 | EPPK1     | 1.96        |
| ANKRD6         | 3.96E-19 | 0.219501256 | 0.091 | 0.046 | 9.55E-15 | 1.2 | ANKRD6    | 1.97826087  |
| RPL22L11       | 5.52E-19 | 0.330016149 | 0.501 | 0.414 | 1.33E-14 | 1.2 | RPL22L1   | 1.210144928 |
| NUB1           | 5.97E-19 | 0.35341246  | 0.261 | 0.186 | 1.44E-14 | 1.2 | NUB1      | 1.403225806 |
| GOS2           | 6.17E-19 | 0.153779981 | 0.051 | 0.02  | 1.49E-14 | 1.2 | GOS2      | 2.55        |
| PRPSAP11       | 6.99E-19 | 0.231948135 | 0.138 | 0.08  | 1.69E-14 | 1.2 | PRPSAP1   | 1.725       |
| LIPG           | 7.59E-19 | 0.151529841 | 0.046 | 0.017 | 1.83E-14 | 1.2 | LIPG      | 2.705882353 |
| LDHB1          | 7.80E-19 | 0.20211574  | 0.652 | 0.555 | 1.88E-14 | 1.2 | LDHB      | 1.174774775 |
| CBX6           | 7.83E-19 | 0.110156116 | 0.05  | 0.019 | 1.89E-14 | 1.2 | CBX6      | 2.631578947 |
| RAN1           | 7.84E-19 | 0.307008116 | 0.593 | 0.523 | 1.89E-14 | 1.2 | RAN       | 1.133843212 |
| PTBP21         | 8.57E-19 | 0.305981687 | 0.42  | 0.337 | 2.07E-14 | 1.2 | PTBP2     | 1.246290801 |
| MSN            | 8.83E-19 | 0.247295049 | 0.495 | 0.413 | 2.13E-14 | 1.2 | MSN       | 1.198547215 |
| CLDN41         | 1.21E-18 | 0.426736065 | 0.269 | 0.191 | 2.91E-14 | 1.2 | CLDN4     | 1.408376963 |
| ZNF6521        | 1.34E-18 | 0.28520129  | 0.522 | 0.438 | 3.23E-14 | 1.2 | ZNF652    | 1.191780822 |
| MAX1           | 2.11E-18 | 0.244850825 | 0.197 | 0.129 | 5.08E-14 | 1.2 | MAX       | 1.527131783 |
| RP11-511B23.21 | 2.17E-18 | 0.259842207 | 0.581 | 0.501 | 5.22E-14 | 1.2 | RP11-511B | 1.159680639 |
| MAT2A          | 2.61E-18 | 0.205511409 | 0.092 | 0.048 | 6.30E-14 | 1.2 | MAT2A     | 1.916666667 |
| PNPLA81        | 2.71E-18 | 0.320452842 | 0.355 | 0.272 | 6.53E-14 | 1.2 | PNPLA8    | 1.305147059 |
| ADAM171        | 2.76E-18 | 0.34010259  | 0.456 | 0.375 | 6.65E-14 | 1.2 | ADAM17    | 1.216       |
| AC090498.11    | 3.32E-18 | 0.274558191 | 0.386 | 0.3   | 8.01E-14 | 1.2 | AC090498. | 1.286666667 |
| PDE1C          | 3.84E-18 | 0.182809923 | 0.079 | 0.038 | 9.27E-14 | 1.2 | PDE1C     | 2.078947368 |
| GTF2B          | 3.99E-18 | 0.292826008 | 0.236 | 0.165 | 9.63E-14 | 1.2 | GTF2B     | 1.43030303  |
| SNX91          | 4.73E-18 | 0.363933568 | 0.491 | 0.417 | 1.14E-13 | 1.2 | SNX9      | 1.177458034 |
| OFD11          | 4.93E-18 | 0.366441911 | 0.319 | 0.244 | 1.19E-13 | 1.2 | OFD1      | 1.307377049 |
| OSBPL10        | 5.20E-18 | 0.268121175 | 0.16  | 0.099 | 1.25E-13 | 1.2 | OSBPL10   | 1.616161616 |
| IRF2           | 6.02E-18 | 0.317530812 | 0.301 | 0.225 | 1.45E-13 | 1.2 | IRF2      | 1.337777778 |
| ZNF562         | 6.73E-18 | 0.280231265 | 0.22  | 0.151 | 1.62E-13 | 1.2 | ZNF562    | 1.456953642 |
| STOX2          | 7.11E-18 | 0.272907503 | 0.144 | 0.087 | 1.72E-13 | 1.2 | STOX2     | 1.655172414 |
| ETV61          | 7.59E-18 | 0.389194851 | 0.628 | 0.572 | 1.83E-13 | 1.2 | ETV6      | 1.097902098 |
| TAGLN          | 8.03E-18 | 0.462358678 | 0.035 | 0.011 | 1.94E-13 | 1.2 | TAGLN     | 3.181818182 |
| RNF19A1        | 1.29E-17 | 0.404261279 | 0.621 | 0.57  | 3.10E-13 | 1.2 | RNF19A    | 1.089473684 |
| YWHAZ          | 1.33E-17 | 0.254732824 | 0.664 | 0.599 | 3.20E-13 | 1.2 | YWHAZ     | 1.10851419  |
| BMS1P14        | 1.40E-17 | 0.11344049  | 0.041 | 0.015 | 3.37E-13 | 1.2 | BMS1P14   | 2.733333333 |
| SNRPG          | 1.40E-17 | 0.333120914 | 0.578 | 0.512 | 3.38E-13 | 1.2 | SNRPG     | 1.12890625  |
| TPI1           | 1.70E-17 | 0.322225386 | 0.433 | 0.352 | 4.09E-13 | 1.2 | TPI1      | 1.230113636 |
| POU2F3         | 1.99E-17 | 0.262685465 | 0.17  | 0.108 | 4.79E-13 | 1.2 | POU2F3    | 1.574074074 |
| RAPGEF5        | 2.05E-17 | 0.358043878 | 0.413 | 0.332 | 4.95E-13 | 1.2 | RAPGEF5   | 1.243975904 |
| FRMD5          | 2.12E-17 | 0.385948701 | 0.192 | 0.128 | 5.10E-13 | 1.2 | FRMD5     | 1.5         |
| B4GALT5        | 2.21E-17 | 0.32124809  | 0.379 | 0.299 | 5.32E-13 | 1.2 | B4GALT5   | 1.267558528 |
| INADL          | 2.71E-17 | 0.193184591 | 0.876 | 0.815 | 6.53E-13 | 1.2 | INADL     | 1.074846626 |
| GCNT11         | 2.73E-17 | 0.190795138 | 0.099 | 0.053 | 6.58E-13 | 1.2 | GCNT1     | 1.867924528 |
| STX7           | 3.21E-17 | 0.242292776 | 0.182 | 0.118 | 7.73E-13 | 1.2 | STX7      | 1.542372881 |
| RPS261         | 3.62E-17 | 0.247515703 | 0.173 | 0.111 | 8.72E-13 | 1.2 | RPS26     | 1.558558559 |
| USP44          | 3.76E-17 | 0.104019851 | 0.041 | 0.015 | 9.07E-13 | 1.2 | USP44     | 2.733333333 |
| TGFA           | 4.69E-17 | 0.193702761 | 0.114 | 0.064 | 1.13E-12 | 1.2 | TGFA      | 1.78125     |
| RDX1           | 5.25E-17 | 0.267964901 | 0.218 | 0.151 | 1.27E-12 | 1.2 | RDX       | 1.443708609 |
| FBXO11         | 6.32E-17 | 0.306393916 | 0.467 | 0.386 | 1.52E-12 | 1.2 | FBXO11    | 1.20984456  |



|              |          |             |       |       |          |     |           |             |
|--------------|----------|-------------|-------|-------|----------|-----|-----------|-------------|
| ENO11        | 6.78E-17 | 0.334319991 | 0.462 | 0.375 | 1.63E-12 | 1.2 | ENO1      | 1.232       |
| MIR4435-2HG1 | 6.92E-17 | 0.311998433 | 0.565 | 0.498 | 1.67E-12 | 1.2 | MIR4435-2 | 1.134538153 |
| RP11-7K24.3  | 8.30E-17 | 0.108273743 | 0.038 | 0.014 | 2.00E-12 | 1.2 | RP11-7K24 | 2.714285714 |
| SRFBP11      | 8.61E-17 | 0.263667797 | 0.21  | 0.143 | 2.08E-12 | 1.2 | SRFBP1    | 1.468531469 |
| GABRE        | 9.85E-17 | 0.142608539 | 0.061 | 0.028 | 2.37E-12 | 1.2 | GABRE     | 2.178571429 |
| MFSD4        | 1.13E-16 | 0.108521773 | 0.045 | 0.017 | 2.72E-12 | 1.2 | MFSD4     | 2.647058824 |
| IL15RA       | 1.13E-16 | 0.176190684 | 0.064 | 0.03  | 2.73E-12 | 1.2 | IL15RA    | 2.133333333 |
| PRKCI1       | 1.27E-16 | 0.262889773 | 0.246 | 0.174 | 3.07E-12 | 1.2 | PRKCI     | 1.413793103 |
| LINC001521   | 1.33E-16 | 0.284432663 | 0.396 | 0.316 | 3.20E-12 | 1.2 | LINC00152 | 1.253164557 |
| PRDX1        | 1.49E-16 | 0.36434057  | 0.732 | 0.679 | 3.58E-12 | 1.2 | PRDX1     | 1.078055965 |
| SPTLC2       | 1.61E-16 | 0.241715979 | 0.214 | 0.146 | 3.89E-12 | 1.2 | SPTLC2    | 1.465753425 |
| MT-CO21      | 1.67E-16 | 0.153650623 | 0.987 | 0.986 | 4.04E-12 | 1.2 | MT-CO2    | 1.001014199 |
| PM20D2       | 2.00E-16 | 0.228250383 | 0.138 | 0.085 | 4.83E-12 | 1.2 | PM20D2    | 1.623529412 |
| BAG51        | 2.02E-16 | 0.204226658 | 0.145 | 0.089 | 4.87E-12 | 1.2 | BAG5      | 1.629213483 |
| RHOA         | 2.09E-16 | 0.30398954  | 0.484 | 0.414 | 5.03E-12 | 1.2 | RHOA      | 1.169082126 |
| MEX3A        | 2.14E-16 | 0.153829894 | 0.075 | 0.037 | 5.16E-12 | 1.2 | MEX3A     | 2.027027027 |
| WFDC3        | 2.15E-16 | 0.21829532  | 0.107 | 0.061 | 5.19E-12 | 1.2 | WFDC3     | 1.754098361 |
| FRK          | 2.30E-16 | 0.253825419 | 0.198 | 0.133 | 5.56E-12 | 1.2 | FRK       | 1.488721805 |
| CXCL8        | 2.39E-16 | 1.233193598 | 0.501 | 0.441 | 5.75E-12 | 1.2 | CXCL8     | 1.136054422 |
| LAMC1        | 3.07E-16 | 0.294851271 | 0.33  | 0.255 | 7.40E-12 | 1.2 | LAMC1     | 1.294117647 |
| MTRNR2L81    | 3.18E-16 | 0.198865877 | 0.201 | 0.134 | 7.67E-12 | 1.2 | MTRNR2L8  | 1.5         |
| STAC         | 3.78E-16 | 0.138785629 | 0.05  | 0.021 | 9.13E-12 | 1.2 | STAC      | 2.380952381 |
| ACSL41       | 3.93E-16 | 0.168304548 | 0.092 | 0.049 | 9.48E-12 | 1.2 | ACSL4     | 1.87755102  |
| ARHGAP101    | 3.97E-16 | 0.304477026 | 0.173 | 0.114 | 9.57E-12 | 1.2 | ARHGAP10  | 1.51754386  |
| JPH2         | 5.10E-16 | 0.119073087 | 0.057 | 0.025 | 1.23E-11 | 1.2 | JPH2      | 2.28        |
| ZNF90        | 6.21E-16 | 0.28619407  | 0.126 | 0.075 | 1.50E-11 | 1.2 | ZNF90     | 1.68        |
| CDH3         | 7.16E-16 | 0.223828698 | 0.18  | 0.118 | 1.73E-11 | 1.2 | CDH3      | 1.525423729 |
| FAM49A1      | 7.46E-16 | 0.137132895 | 0.062 | 0.029 | 1.80E-11 | 1.2 | FAM49A    | 2.137931034 |
| WWTR11       | 8.19E-16 | 0.275476009 | 0.417 | 0.339 | 1.97E-11 | 1.2 | WWTR1     | 1.230088496 |
| HOTAIRM11    | 8.60E-16 | 0.134894376 | 0.066 | 0.032 | 2.07E-11 | 1.2 | HOTAIRM1  | 2.0625      |
| KRT191       | 8.60E-16 | 0.401028325 | 0.359 | 0.28  | 2.07E-11 | 1.2 | KRT19     | 1.282142857 |
| ZBTB38       | 8.82E-16 | 0.277026427 | 0.396 | 0.318 | 2.13E-11 | 1.2 | ZBTB38    | 1.245283019 |
| TAF1D1       | 1.02E-15 | 0.254818533 | 0.341 | 0.261 | 2.45E-11 | 1.2 | TAF1D     | 1.30651341  |
| POMP         | 1.46E-15 | 0.295582815 | 0.677 | 0.628 | 3.52E-11 | 1.2 | POMP      | 1.078025478 |
| ATP5L1       | 1.52E-15 | 0.174593968 | 0.833 | 0.808 | 3.67E-11 | 1.2 | ATP5L     | 1.030940594 |
| SGPP2        | 1.93E-15 | 0.254993179 | 0.163 | 0.106 | 4.64E-11 | 1.2 | SGPP2     | 1.537735849 |
| DEGS1        | 1.95E-15 | 0.192424611 | 0.103 | 0.058 | 4.70E-11 | 1.2 | DEGS1     | 1.775862069 |
| PTTG11       | 2.11E-15 | 0.160712953 | 0.06  | 0.028 | 5.08E-11 | 1.2 | PTTG1     | 2.142857143 |
| RP11-37B2.1  | 2.17E-15 | 0.408837116 | 0.287 | 0.221 | 5.24E-11 | 1.2 | RP11-37B2 | 1.298642534 |
| CSNK1E       | 2.70E-15 | 0.316866458 | 0.291 | 0.222 | 6.52E-11 | 1.2 | CSNK1E    | 1.310810811 |
| GATA6        | 2.75E-15 | 0.165402641 | 0.072 | 0.036 | 6.64E-11 | 1.2 | GATA6     | 2           |
| PSMC1        | 2.90E-15 | 0.309614985 | 0.345 | 0.273 | 7.00E-11 | 1.2 | PSMC1     | 1.263736264 |
| B4GALNT3     | 3.24E-15 | 0.177737511 | 0.077 | 0.039 | 7.81E-11 | 1.2 | B4GALNT3  | 1.974358974 |
| SSBP1        | 3.41E-15 | 0.246161332 | 0.431 | 0.354 | 8.22E-11 | 1.2 | SSBP1     | 1.217514124 |
| DTX2         | 3.46E-15 | 0.188030094 | 0.109 | 0.063 | 8.33E-11 | 1.2 | DTX2      | 1.73015873  |
| ATP11B1      | 3.65E-15 | 0.21861088  | 0.213 | 0.147 | 8.81E-11 | 1.2 | ATP11B    | 1.448979592 |
| SKAP2        | 3.89E-15 | 0.262591208 | 0.258 | 0.189 | 9.39E-11 | 1.2 | SKAP2     | 1.365079365 |
| MYRFL        | 4.01E-15 | 0.231814402 | 0.117 | 0.07  | 9.67E-11 | 1.2 | MYRFL     | 1.671428571 |
| STK10        | 4.07E-15 | 0.179549312 | 0.098 | 0.055 | 9.81E-11 | 1.2 | STK10     | 1.781818182 |
| ST6GAL1      | 4.24E-15 | 0.25682824  | 0.321 | 0.244 | 1.02E-10 | 1.2 | ST6GAL1   | 1.31557377  |
| FXR11        | 5.45E-15 | 0.222621157 | 0.423 | 0.344 | 1.31E-10 | 1.2 | FXR1      | 1.229651163 |
| TRMT10C      | 5.79E-15 | 0.214213754 | 0.137 | 0.086 | 1.40E-10 | 1.2 | TRMT10C   | 1.593023256 |

|               |          |             |       |       |          |     |            |             |
|---------------|----------|-------------|-------|-------|----------|-----|------------|-------------|
| PDZD21        | 5.88E-15 | 0.255127955 | 0.538 | 0.466 | 1.42E-10 | 1.2 | PDZD2      | 1.154506438 |
| PELI11        | 6.70E-15 | 0.269443426 | 0.399 | 0.323 | 1.62E-10 | 1.2 | PELI1      | 1.235294118 |
| EIF2S11       | 7.08E-15 | 0.338264504 | 0.257 | 0.194 | 1.71E-10 | 1.2 | EIF2S1     | 1.324742268 |
| CCL4          | 7.68E-15 | 1.133134161 | 0.085 | 0.046 | 1.85E-10 | 1.2 | CCL4       | 1.847826087 |
| S100B1        | 8.28E-15 | 0.116192243 | 0.05  | 0.022 | 2.00E-10 | 1.2 | S100B      | 2.272727273 |
| SASH11        | 9.38E-15 | 0.261534338 | 0.217 | 0.153 | 2.26E-10 | 1.2 | SASH1      | 1.418300654 |
| HEATR9        | 1.04E-14 | 0.124974409 | 0.065 | 0.032 | 2.51E-10 | 1.2 | HEATR9     | 2.03125     |
| SLC1A5        | 1.19E-14 | 0.135835208 | 0.063 | 0.031 | 2.86E-10 | 1.2 | SLC1A5     | 2.032258065 |
| NLGN4X        | 1.24E-14 | 0.204908039 | 0.08  | 0.043 | 3.00E-10 | 1.2 | NLGN4X     | 1.860465116 |
| MAPKBP11      | 1.25E-14 | 0.219320622 | 0.117 | 0.07  | 3.02E-10 | 1.2 | MAPKBP1    | 1.671428571 |
| UBASH3B       | 1.29E-14 | 0.175015266 | 0.083 | 0.044 | 3.12E-10 | 1.2 | UBASH3B    | 1.886363636 |
| EPB41L3       | 1.30E-14 | 0.124933506 | 0.039 | 0.015 | 3.13E-10 | 1.2 | EPB41L3    | 2.6         |
| PNISR         | 1.43E-14 | 0.204814715 | 0.737 | 0.674 | 3.44E-10 | 1.2 | PNISR      | 1.09347181  |
| DAAM11        | 1.48E-14 | 0.289745785 | 0.561 | 0.504 | 3.56E-10 | 1.2 | DAAM1      | 1.113095238 |
| KIAA0355      | 1.62E-14 | 0.215395024 | 0.16  | 0.104 | 3.92E-10 | 1.2 | KIAA0355   | 1.538461538 |
| VPS291        | 2.23E-14 | 0.220726885 | 0.392 | 0.314 | 5.38E-10 | 1.2 | VPS29      | 1.248407643 |
| SLC15A4       | 2.79E-14 | 0.153989678 | 0.091 | 0.051 | 6.74E-10 | 1.2 | SLC15A4    | 1.784313725 |
| CEACAM19      | 2.89E-14 | 0.139277528 | 0.062 | 0.03  | 6.97E-10 | 1.2 | CEACAM19   | 2.066666667 |
| BBOX11        | 2.91E-14 | 0.211589859 | 0.179 | 0.119 | 7.03E-10 | 1.2 | BBOX1      | 1.504201681 |
| SUPT3H        | 3.04E-14 | 0.250107877 | 0.161 | 0.106 | 7.34E-10 | 1.2 | SUPT3H     | 1.518867925 |
| SDCBP2        | 3.07E-14 | 0.102221515 | 0.039 | 0.015 | 7.39E-10 | 1.2 | SDCBP2     | 2.6         |
| UBE2N         | 3.24E-14 | 0.265042611 | 0.263 | 0.199 | 7.82E-10 | 1.2 | UBE2N      | 1.32160804  |
| MINK1         | 3.26E-14 | 0.210086135 | 0.147 | 0.095 | 7.87E-10 | 1.2 | MINK1      | 1.547368421 |
| MPZL2         | 3.50E-14 | 0.184026516 | 0.129 | 0.081 | 8.43E-10 | 1.2 | MPZL2      | 1.592592593 |
| SPATS2L       | 3.51E-14 | 0.294278471 | 0.302 | 0.232 | 8.46E-10 | 1.2 | SPATS2L    | 1.301724138 |
| PRKCA1        | 3.56E-14 | 0.19086879  | 0.107 | 0.063 | 8.57E-10 | 1.2 | PRKCA      | 1.698412698 |
| KARS1         | 4.03E-14 | 0.240948935 | 0.311 | 0.241 | 9.71E-10 | 1.2 | KARS       | 1.290456432 |
| TMEM51        | 4.14E-14 | 0.231773032 | 0.206 | 0.146 | 9.98E-10 | 1.2 | TMEM51     | 1.410958904 |
| RNF19B        | 4.88E-14 | 0.29812728  | 0.196 | 0.138 | 1.18E-09 | 1.2 | RNF19B     | 1.420289855 |
| KCNK1         | 5.43E-14 | 0.245813172 | 0.215 | 0.153 | 1.31E-09 | 1.2 | KCNK1      | 1.405228758 |
| FAM60A1       | 5.56E-14 | 0.227223106 | 0.377 | 0.304 | 1.34E-09 | 1.2 | FAM60A     | 1.240131579 |
| RP11-231C18.3 | 7.39E-14 | 0.252565119 | 0.226 | 0.163 | 1.78E-09 | 1.2 | RP11-231C  | 1.386503067 |
| MIR155HG1     | 7.90E-14 | 0.100878456 | 0.027 | 0.009 | 1.90E-09 | 1.2 | MIR155HG   | 3           |
| HUWE1         | 8.28E-14 | 0.296413167 | 0.333 | 0.267 | 2.00E-09 | 1.2 | HUWE1      | 1.247191011 |
| PHLPP11       | 8.35E-14 | 0.301706018 | 0.466 | 0.393 | 2.01E-09 | 1.2 | PHLPP1     | 1.185750636 |
| GABPB1-AS1    | 8.43E-14 | 0.263964696 | 0.193 | 0.135 | 2.03E-09 | 1.2 | GABPB1-AS1 | 1.42962963  |
| FAM157C       | 8.54E-14 | 0.19903361  | 0.127 | 0.08  | 2.06E-09 | 1.2 | FAM157C    | 1.5875      |
| XPNPEP1       | 8.89E-14 | 0.188720036 | 0.127 | 0.079 | 2.14E-09 | 1.2 | XPNPEP1    | 1.607594937 |
| RPS31         | 1.10E-13 | 0.186606664 | 0.914 | 0.864 | 2.66E-09 | 1.2 | RPS3       | 1.05787037  |
| GNL31         | 1.18E-13 | 0.274360446 | 0.305 | 0.241 | 2.85E-09 | 1.2 | GNL3       | 1.265560166 |
| FAM222B       | 1.27E-13 | 0.242483439 | 0.269 | 0.203 | 3.06E-09 | 1.2 | FAM222B    | 1.325123153 |
| SVIL-AS1      | 1.34E-13 | 0.174987242 | 0.153 | 0.1   | 3.23E-09 | 1.2 | SVIL-AS1   | 1.53        |
| KDM7A1        | 1.46E-13 | 0.270300816 | 0.339 | 0.269 | 3.51E-09 | 1.2 | KDM7A      | 1.260223048 |
| SPDYE16       | 1.55E-13 | 0.163980357 | 0.1   | 0.059 | 3.75E-09 | 1.2 | SPDYE16    | 1.694915254 |
| NNT           | 1.58E-13 | 0.221969607 | 0.1   | 0.059 | 3.81E-09 | 1.2 | NNT        | 1.694915254 |
| NDUFS51       | 1.59E-13 | 0.186650146 | 0.808 | 0.769 | 3.83E-09 | 1.2 | NDUFS5     | 1.050715215 |
| EYA2          | 1.74E-13 | 0.249472023 | 0.154 | 0.102 | 4.21E-09 | 1.2 | EYA2       | 1.509803922 |
| SERTAD21      | 1.84E-13 | 0.193635917 | 0.225 | 0.16  | 4.43E-09 | 1.2 | SERTAD2    | 1.40625     |
| LHFPL21       | 1.88E-13 | 0.157110262 | 0.366 | 0.287 | 4.53E-09 | 1.2 | LHFPL2     | 1.275261324 |
| SEC31A        | 1.88E-13 | 0.260411497 | 0.462 | 0.391 | 4.54E-09 | 1.2 | SEC31A     | 1.181585678 |
| MCAM1         | 1.94E-13 | 0.103550529 | 0.038 | 0.015 | 4.68E-09 | 1.2 | MCAM       | 2.533333333 |
| ARHGAP171     | 2.30E-13 | 0.207636221 | 0.218 | 0.156 | 5.56E-09 | 1.2 | ARHGAP17   | 1.397435897 |

|                 |          |             |       |       |          |     |           |             |
|-----------------|----------|-------------|-------|-------|----------|-----|-----------|-------------|
| SNRPE1          | 2.73E-13 | 0.215731183 | 0.581 | 0.516 | 6.58E-09 | 1.2 | SNRPE     | 1.125968992 |
| CHCHD31         | 2.98E-13 | 0.229483961 | 0.857 | 0.835 | 7.18E-09 | 1.2 | CHCHD3    | 1.026347305 |
| VDAC31          | 2.99E-13 | 0.257209859 | 0.33  | 0.263 | 7.20E-09 | 1.2 | VDAC3     | 1.254752852 |
| PCSK51          | 4.63E-13 | 0.186931627 | 0.062 | 0.031 | 1.12E-08 | 1.2 | PCSK5     | 2           |
| PPFIA11         | 4.66E-13 | 0.2881694   | 0.3   | 0.235 | 1.12E-08 | 1.2 | PPFIA1    | 1.276595745 |
| TCP11           | 4.72E-13 | 0.219311475 | 0.224 | 0.163 | 1.14E-08 | 1.2 | TCP1      | 1.374233129 |
| ADRBK2          | 4.89E-13 | 0.196052808 | 0.124 | 0.078 | 1.18E-08 | 1.2 | ADRBK2    | 1.58974359  |
| SOS2            | 5.12E-13 | 0.286581551 | 0.483 | 0.42  | 1.24E-08 | 1.2 | SOS2      | 1.15        |
| LRRK1           | 6.45E-13 | 0.175377482 | 0.092 | 0.053 | 1.55E-08 | 1.2 | LRRK1     | 1.735849057 |
| TRAF3IP2        | 6.74E-13 | 0.261401523 | 0.175 | 0.122 | 1.62E-08 | 1.2 | TRAF3IP2  | 1.43442623  |
| EZR             | 6.86E-13 | 0.227544926 | 0.445 | 0.372 | 1.65E-08 | 1.2 | EZR       | 1.196236559 |
| GGACT           | 7.04E-13 | 0.219183163 | 0.193 | 0.137 | 1.70E-08 | 1.2 | GGACT     | 1.408759124 |
| SFT2D21         | 7.23E-13 | 0.211138301 | 0.183 | 0.128 | 1.74E-08 | 1.2 | SFT2D2    | 1.4296875   |
| FAM221A1        | 8.00E-13 | 0.100896866 | 0.041 | 0.018 | 1.93E-08 | 1.2 | FAM221A   | 2.277777778 |
| AGFG11          | 8.76E-13 | 0.272111333 | 0.384 | 0.316 | 2.11E-08 | 1.2 | AGFG1     | 1.215189873 |
| AIMP11          | 1.01E-12 | 0.22830058  | 0.368 | 0.296 | 2.43E-08 | 1.2 | AIMP1     | 1.243243243 |
| FGGY            | 1.03E-12 | 0.208420944 | 0.191 | 0.134 | 2.49E-08 | 1.2 | FGGY      | 1.425373134 |
| TCEB1           | 1.18E-12 | 0.313202693 | 0.366 | 0.302 | 2.84E-08 | 1.2 | TCEB1     | 1.21192053  |
| MAD1L1          | 1.37E-12 | 0.163793246 | 0.076 | 0.042 | 3.30E-08 | 1.2 | MAD1L1    | 1.80952381  |
| DMTF1           | 1.44E-12 | 0.219551764 | 0.154 | 0.104 | 3.46E-08 | 1.2 | DMTF1     | 1.480769231 |
| ARHGEF281       | 1.50E-12 | 0.107034005 | 0.342 | 0.268 | 3.62E-08 | 1.2 | ARHGEF28  | 1.276119403 |
| NCOA3           | 1.50E-12 | 0.256629572 | 0.313 | 0.248 | 3.62E-08 | 1.2 | NCOA3     | 1.262096774 |
| PRDM1           | 1.60E-12 | 0.138446533 | 0.06  | 0.03  | 3.85E-08 | 1.2 | PRDM1     | 2           |
| SNX24           | 1.72E-12 | 0.211361593 | 0.224 | 0.165 | 4.15E-08 | 1.2 | SNX24     | 1.357575758 |
| RELA            | 1.93E-12 | 0.153804402 | 0.124 | 0.078 | 4.67E-08 | 1.2 | RELA      | 1.58974359  |
| HERC11          | 2.10E-12 | 0.199905812 | 0.38  | 0.307 | 5.05E-08 | 1.2 | HERC1     | 1.237785016 |
| PLEKHA2         | 2.21E-12 | 0.115352926 | 0.05  | 0.023 | 5.34E-08 | 1.2 | PLEKHA2   | 2.173913043 |
| TMEM150C1       | 2.22E-12 | 0.25986134  | 0.261 | 0.202 | 5.35E-08 | 1.2 | TMEM150C  | 1.292079208 |
| PRICKLE11       | 2.40E-12 | 0.191253824 | 0.087 | 0.05  | 5.79E-08 | 1.2 | PRICKLE1  | 1.74        |
| MT-CO11         | 2.66E-12 | 0.19675899  | 0.991 | 0.992 | 6.42E-08 | 1.2 | MT-CO1    | 0.998991935 |
| VCL1            | 2.81E-12 | 0.188005893 | 0.38  | 0.305 | 6.77E-08 | 1.2 | VCL       | 1.245901639 |
| TNFAIP8         | 3.64E-12 | 0.412007095 | 0.438 | 0.381 | 8.79E-08 | 1.2 | TNFAIP8   | 1.149606299 |
| TEAD1           | 3.74E-12 | 0.170178113 | 0.524 | 0.447 | 9.01E-08 | 1.2 | TEAD1     | 1.172259508 |
| RP11-398K22.121 | 3.82E-12 | 0.149511717 | 0.067 | 0.036 | 9.22E-08 | 1.2 | RP11-398K | 1.861111111 |
| PHACTR21        | 3.95E-12 | 0.176527651 | 0.105 | 0.064 | 9.53E-08 | 1.2 | PHACTR2   | 1.640625    |
| TMEM1231        | 4.03E-12 | 0.17843077  | 0.367 | 0.298 | 9.72E-08 | 1.2 | TMEM123   | 1.231543624 |
| TRNAU1AP        | 4.08E-12 | 0.217015633 | 0.289 | 0.226 | 9.85E-08 | 1.2 | TRNAU1AP  | 1.278761062 |
| EIF1B1          | 4.54E-12 | 0.215657861 | 0.282 | 0.218 | 1.09E-07 | 1.2 | EIF1B     | 1.293577982 |
| CASC81          | 4.96E-12 | 0.120056526 | 0.075 | 0.042 | 1.20E-07 | 1.2 | CASC8     | 1.785714286 |
| RIT1            | 5.49E-12 | 0.143436901 | 0.089 | 0.052 | 1.32E-07 | 1.2 | RIT1      | 1.711538462 |
| PSMD12          | 5.52E-12 | 0.200811198 | 0.145 | 0.097 | 1.33E-07 | 1.2 | PSMD12    | 1.494845361 |
| MPP51           | 5.52E-12 | 0.2192713   | 0.269 | 0.206 | 1.33E-07 | 1.2 | MPP5      | 1.305825243 |
| CAMSAP11        | 5.68E-12 | 0.153431637 | 0.102 | 0.062 | 1.37E-07 | 1.2 | CAMSAP1   | 1.64516129  |
| PLA2G16         | 5.76E-12 | 0.240888834 | 0.136 | 0.09  | 1.39E-07 | 1.2 | PLA2G16   | 1.511111111 |
| DFFA            | 5.91E-12 | 0.126743387 | 0.075 | 0.042 | 1.42E-07 | 1.2 | DFFA      | 1.785714286 |
| NCOA2           | 6.64E-12 | 0.349570417 | 0.487 | 0.43  | 1.60E-07 | 1.2 | NCOA2     | 1.13255814  |
| NARS            | 6.69E-12 | 0.282102584 | 0.31  | 0.252 | 1.61E-07 | 1.2 | NARS      | 1.23015873  |
| RTN41           | 6.78E-12 | 0.190215473 | 0.698 | 0.65  | 1.63E-07 | 1.2 | RTN4      | 1.073846154 |
| RGS6            | 6.91E-12 | 0.293811994 | 0.165 | 0.115 | 1.67E-07 | 1.2 | RGS6      | 1.434782609 |
| CTA-293F17.11   | 6.94E-12 | 0.163376129 | 0.11  | 0.068 | 1.67E-07 | 1.2 | CTA-293F1 | 1.617647059 |
| SUMO11          | 7.68E-12 | 0.242078436 | 0.543 | 0.493 | 1.85E-07 | 1.2 | SUMO1     | 1.101419878 |
| TPK11           | 7.74E-12 | 0.252305075 | 0.262 | 0.203 | 1.87E-07 | 1.2 | TPK1      | 1.290640394 |

|                |          |             |             |       |          |          |            |             |             |
|----------------|----------|-------------|-------------|-------|----------|----------|------------|-------------|-------------|
| NOD21          | 8.49E-12 | 0.13837335  | 0.069       | 0.038 | 2.05E-07 | 1.2      | NOD2       | 1.815789474 |             |
| EIF3D1         | 9.24E-12 | 0.241737002 | 0.385       | 0.322 | 2.23E-07 | 1.2      | EIF3D      | 1.195652174 |             |
| SEC621         | 9.65E-12 | 0.211467732 | 0.624       | 0.574 | 2.33E-07 | 1.2      | SEC62      | 1.087108014 |             |
| HSPA8          | 9.75E-12 | 0.302354057 | 0.511       | 0.453 | 2.35E-07 | 1.2      | HSPA8      | 1.12803532  |             |
|                | Sep-11   | 1.05E-11    | 0.202101682 | 0.145 | 0.098    | 2.52E-07 | 1.2        | Sep-11      | 1.479591837 |
| NLRC5          | 1.33E-11 | 0.132218316 | 0.052       | 0.026 | 3.20E-07 | 1.2      | NLRC5      | 2           |             |
| RNF1141        | 1.35E-11 | 0.214327833 | 0.173       | 0.122 | 3.25E-07 | 1.2      | RNF114     | 1.418032787 |             |
| TGFB21         | 1.43E-11 | 0.302276922 | 0.244       | 0.184 | 3.44E-07 | 1.2      | TGFB2      | 1.326086957 |             |
| RIPK21         | 1.45E-11 | 0.219200258 | 0.344       | 0.274 | 3.49E-07 | 1.2      | RIPK2      | 1.255474453 |             |
| CDC5L1         | 1.51E-11 | 0.214809786 | 0.252       | 0.194 | 3.63E-07 | 1.2      | CDC5L      | 1.298969072 |             |
| MCF2L21        | 1.85E-11 | 0.21247454  | 0.142       | 0.096 | 4.47E-07 | 1.2      | MCF2L2     | 1.479166667 |             |
| NONO1          | 2.07E-11 | 0.227241437 | 0.371       | 0.309 | 4.98E-07 | 1.2      | NONO       | 1.200647249 |             |
| KCNK5          | 2.09E-11 | 0.104441598 | 0.036       | 0.015 | 5.03E-07 | 1.2      | KCNK5      | 2.4         |             |
| DDX181         | 2.28E-11 | 0.277695596 | 0.347       | 0.283 | 5.49E-07 | 1.2      | DDX18      | 1.22614841  |             |
| IGFBP5         | 2.33E-11 | 0.221645999 | 0.067       | 0.037 | 5.61E-07 | 1.2      | IGFBP5     | 1.810810811 |             |
| SMYD2          | 2.43E-11 | 0.159869524 | 0.069       | 0.038 | 5.86E-07 | 1.2      | SMYD2      | 1.815789474 |             |
| MUC16          | 2.47E-11 | 0.125271186 | 0.049       | 0.024 | 5.96E-07 | 1.2      | MUC16      | 2.041666667 |             |
| PCNP1          | 2.79E-11 | 0.222988462 | 0.395       | 0.333 | 6.74E-07 | 1.2      | PCNP       | 1.186186186 |             |
| ZRANB11        | 3.15E-11 | 0.208716912 | 0.203       | 0.148 | 7.59E-07 | 1.2      | ZRANB1     | 1.371621622 |             |
| MYADM          | 3.26E-11 | 0.125789328 | 0.077       | 0.044 | 7.87E-07 | 1.2      | MYADM      | 1.75        |             |
| SEC11A1        | 3.40E-11 | 0.216897254 | 0.532       | 0.479 | 8.20E-07 | 1.2      | SEC11A     | 1.110647182 |             |
| LINC01389      | 3.46E-11 | 0.10300799  | 0.04        | 0.018 | 8.35E-07 | 1.2      | LINC01389  | 2.222222222 |             |
| AGPS           | 3.64E-11 | 0.141987905 | 0.069       | 0.039 | 8.79E-07 | 1.2      | AGPS       | 1.769230769 |             |
| CCNC           | 3.69E-11 | 0.231835571 | 0.27        | 0.212 | 8.90E-07 | 1.2      | CCNC       | 1.273584906 |             |
| COPB11         | 3.71E-11 | 0.208267887 | 0.244       | 0.187 | 8.95E-07 | 1.2      | COPB1      | 1.304812834 |             |
| PAK31          | 4.13E-11 | 0.111181251 | 0.075       | 0.042 | 9.96E-07 | 1.2      | PAK3       | 1.785714286 |             |
| RUSC21         | 4.15E-11 | 0.183713746 | 0.105       | 0.066 | 1.00E-06 | 1.2      | RUSC2      | 1.590909091 |             |
| ATP6V1D        | 4.27E-11 | 0.306301597 | 0.326       | 0.271 | 1.03E-06 | 1.2      | ATP6V1D    | 1.20295203  |             |
| TGFBR31        | 4.36E-11 | 0.240749965 | 0.14        | 0.095 | 1.05E-06 | 1.2      | TGFBR3     | 1.473684211 |             |
| CCL2           | 5.05E-11 | 0.690160631 | 0.319       | 0.253 | 1.22E-06 | 1.2      | CCL2       | 1.260869565 |             |
| HSPG2          | 5.24E-11 | 0.177834477 | 0.12        | 0.078 | 1.26E-06 | 1.2      | HSPG2      | 1.538461538 |             |
| WTAP1          | 5.46E-11 | 0.177194771 | 0.57        | 0.509 | 1.32E-06 | 1.2      | WTAP       | 1.119842829 |             |
| KRT71          | 5.54E-11 | 0.252695742 | 0.321       | 0.258 | 1.34E-06 | 1.2      | KRT7       | 1.244186047 |             |
| EIF311         | 6.29E-11 | 0.221250507 | 0.64        | 0.591 | 1.52E-06 | 1.2      | EIF31      | 1.082910321 |             |
| ITGBL11        | 6.36E-11 | 0.142431127 | 0.049       | 0.024 | 1.53E-06 | 1.2      | ITGBL1     | 2.041666667 |             |
| PHGDH          | 6.79E-11 | 0.113190421 | 0.047       | 0.023 | 1.64E-06 | 1.2      | PHGDH      | 2.043478261 |             |
| S100A10        | 7.59E-11 | 0.276752969 | 0.45        | 0.381 | 1.83E-06 | 1.2      | S100A10    | 1.181102362 |             |
| RCAN31         | 7.79E-11 | 0.469577269 | 0.238       | 0.185 | 1.88E-06 | 1.2      | RCAN3      | 1.286486486 |             |
| RP11-452H21.1  | 8.65E-11 | 0.166025798 | 0.105       | 0.066 | 2.09E-06 | 1.2      | RP11-452H  | 1.590909091 |             |
| HEBP2          | 9.09E-11 | 0.202403199 | 0.205       | 0.152 | 2.19E-06 | 1.2      | HEBP2      | 1.348684211 |             |
| TP53BP21       | 9.91E-11 | 0.18821534  | 0.168       | 0.119 | 2.39E-06 | 1.2      | TP53BP2    | 1.411764706 |             |
| RP11-840I19.31 | 1.00E-10 | 0.146224237 | 0.094       | 0.058 | 2.41E-06 | 1.2      | RP11-840I1 | 1.620689655 |             |
| MAP2K3         | 1.06E-10 | 0.165173338 | 0.094       | 0.058 | 2.55E-06 | 1.2      | MAP2K3     | 1.620689655 |             |
| RP11-417F21.1  | 1.12E-10 | 0.177101011 | 0.136       | 0.093 | 2.70E-06 | 1.2      | RP11-417F  | 1.462365591 |             |
| PEA15          | 1.13E-10 | 0.226345937 | 0.246       | 0.192 | 2.72E-06 | 1.2      | PEA15      | 1.28125     |             |
| MAP2K1         | 1.13E-10 | 0.221548252 | 0.311       | 0.248 | 2.72E-06 | 1.2      | MAP2K1     | 1.254032258 |             |
| PRELID2        | 1.16E-10 | 0.179915849 | 0.107       | 0.068 | 2.80E-06 | 1.2      | PRELID2    | 1.573529412 |             |
| TBX191         | 1.17E-10 | 0.151848243 | 0.091       | 0.055 | 2.81E-06 | 1.2      | TBX19      | 1.654545455 |             |
| LINC008871     | 1.37E-10 | 0.134480723 | 0.061       | 0.033 | 3.30E-06 | 1.2      | LINC00887  | 1.848484848 |             |
| ZNF195         | 1.55E-10 | 0.149204366 | 0.111       | 0.072 | 3.74E-06 | 1.2      | ZNF195     | 1.541666667 |             |
| SH3YL11        | 1.60E-10 | 0.189442453 | 0.256       | 0.199 | 3.86E-06 | 1.2      | SH3YL1     | 1.286432161 |             |
| NSRP1          | 1.62E-10 | 0.229044112 | 0.26        | 0.206 | 3.90E-06 | 1.2      | NSRP1      | 1.262135922 |             |

|               |          |             |       |       |          |     |           |             |
|---------------|----------|-------------|-------|-------|----------|-----|-----------|-------------|
| OCLN          | 1.63E-10 | 0.150576629 | 0.404 | 0.332 | 3.92E-06 | 1.2 | OCLN      | 1.21686747  |
| RP11-244M2.11 | 1.64E-10 | 0.168465085 | 0.473 | 0.404 | 3.96E-06 | 1.2 | RP11-244M | 1.170792079 |
| NUFIP2        | 1.70E-10 | 0.207828337 | 0.236 | 0.181 | 4.10E-06 | 1.2 | NUFIP2    | 1.303867403 |
| ATP1B3        | 1.72E-10 | 0.215197599 | 0.31  | 0.251 | 4.15E-06 | 1.2 | ATP1B3    | 1.235059761 |
| IFFO21        | 1.84E-10 | 0.219822292 | 0.159 | 0.112 | 4.43E-06 | 1.2 | IFFO2     | 1.419642857 |
| BEND7         | 1.94E-10 | 0.141798637 | 0.113 | 0.073 | 4.68E-06 | 1.2 | BEND7     | 1.547945205 |
| PLAC9         | 2.24E-10 | 0.106257639 | 0.044 | 0.021 | 5.40E-06 | 1.2 | PLAC9     | 2.095238095 |
| GAB2          | 2.25E-10 | 0.229277283 | 0.25  | 0.195 | 5.43E-06 | 1.2 | GAB2      | 1.282051282 |
| DYRK31        | 2.37E-10 | 0.148698383 | 0.075 | 0.044 | 5.71E-06 | 1.2 | DYRK3     | 1.704545455 |
| PPHLN11       | 2.40E-10 | 0.20729436  | 0.392 | 0.334 | 5.78E-06 | 1.2 | PPHLN1    | 1.173652695 |
| FAR11         | 2.41E-10 | 0.160255732 | 0.133 | 0.089 | 5.81E-06 | 1.2 | FAR1      | 1.494382022 |
| PRMT1         | 2.63E-10 | 0.180294274 | 0.044 | 0.021 | 6.34E-06 | 1.2 | PRMT1     | 2.095238095 |
| STIL          | 2.65E-10 | 0.16894168  | 0.079 | 0.048 | 6.40E-06 | 1.2 | STIL      | 1.645833333 |
| KPNA2         | 2.68E-10 | 0.192678682 | 0.185 | 0.135 | 6.47E-06 | 1.2 | KPNA2     | 1.37037037  |
| SARS1         | 2.70E-10 | 0.214162705 | 0.226 | 0.172 | 6.51E-06 | 1.2 | SARS      | 1.313953488 |
| EXT2          | 2.82E-10 | 0.185894638 | 0.15  | 0.104 | 6.80E-06 | 1.2 | EXT2      | 1.442307692 |
| EIF4B1        | 2.96E-10 | 0.183921341 | 0.436 | 0.377 | 7.13E-06 | 1.2 | EIF4B     | 1.156498674 |
| TNFRSF1B      | 2.96E-10 | 0.124922003 | 0.062 | 0.034 | 7.14E-06 | 1.2 | TNFRSF1B  | 1.823529412 |
| TAF7          | 2.99E-10 | 0.202090327 | 0.156 | 0.11  | 7.21E-06 | 1.2 | TAF7      | 1.418181818 |
| C8orf591      | 3.00E-10 | 0.187730903 | 0.342 | 0.282 | 7.23E-06 | 1.2 | C8orf59   | 1.212765957 |
| SEC24B1       | 3.01E-10 | 0.230145371 | 0.298 | 0.239 | 7.25E-06 | 1.2 | SEC24B    | 1.246861925 |
| MGST3         | 3.14E-10 | 0.253573631 | 0.475 | 0.42  | 7.57E-06 | 1.2 | MGST3     | 1.130952381 |
| TEC           | 3.23E-10 | 0.165550724 | 0.075 | 0.044 | 7.78E-06 | 1.2 | TEC       | 1.704545455 |
| EIF5B         | 4.08E-10 | 0.25037506  | 0.256 | 0.204 | 9.84E-06 | 1.2 | EIF5B     | 1.254901961 |
| SLC7A11       | 4.40E-10 | 0.1258928   | 0.08  | 0.048 | 1.06E-05 | 1.2 | SLC7A11   | 1.666666667 |
| ESD1          | 4.55E-10 | 0.16394861  | 0.374 | 0.309 | 1.10E-05 | 1.2 | ESD       | 1.210355987 |
| MLXIP         | 4.77E-10 | 0.208427752 | 0.18  | 0.132 | 1.15E-05 | 1.2 | MLXIP     | 1.363636364 |
| SH3RF2        | 4.83E-10 | 0.107894684 | 0.047 | 0.024 | 1.16E-05 | 1.2 | SH3RF2    | 1.958333333 |
| CEBPZ         | 5.06E-10 | 0.221588249 | 0.196 | 0.148 | 1.22E-05 | 1.2 | CEBPZ     | 1.324324324 |
| CECR7         | 6.66E-10 | 0.120120136 | 0.072 | 0.042 | 1.61E-05 | 1.2 | CECR7     | 1.714285714 |
| TXN           | 6.96E-10 | 0.267744388 | 0.7   | 0.673 | 1.68E-05 | 1.2 | TXN       | 1.040118871 |
| NUTM2A-AS1    | 7.08E-10 | 0.16395648  | 0.36  | 0.298 | 1.71E-05 | 1.2 | NUTM2A-A  | 1.208053691 |
| CAPZA1        | 7.22E-10 | 0.209854226 | 0.471 | 0.415 | 1.74E-05 | 1.2 | CAPZA1    | 1.134939759 |
| SCAPER        | 7.67E-10 | 0.226376459 | 0.207 | 0.157 | 1.85E-05 | 1.2 | SCAPER    | 1.318471338 |
| CPSF6         | 7.75E-10 | 0.174873837 | 0.167 | 0.121 | 1.87E-05 | 1.2 | CPSF6     | 1.380165289 |
| NUS11         | 8.79E-10 | 0.152390629 | 0.117 | 0.078 | 2.12E-05 | 1.2 | NUS1      | 1.5         |
| MAP4          | 9.33E-10 | 0.192086012 | 0.533 | 0.477 | 2.25E-05 | 1.2 | MAP4      | 1.117400419 |
| RPF21         | 9.34E-10 | 0.166221971 | 0.179 | 0.131 | 2.25E-05 | 1.2 | RPF2      | 1.366412214 |
| BTBD10        | 9.49E-10 | 0.153396372 | 0.086 | 0.053 | 2.29E-05 | 1.2 | BTBD10    | 1.622641509 |
| MFN1          | 9.49E-10 | 0.180812209 | 0.168 | 0.121 | 2.29E-05 | 1.2 | MFN1      | 1.388429752 |
| RP11-530C5.1  | 9.55E-10 | 0.143624577 | 0.057 | 0.031 | 2.30E-05 | 1.2 | RP11-530C | 1.838709677 |
| RABGGTB1      | 1.14E-09 | 0.154425646 | 0.111 | 0.073 | 2.74E-05 | 1.2 | RABGGTB   | 1.520547945 |
| RTP41         | 1.17E-09 | 0.142303237 | 0.07  | 0.041 | 2.83E-05 | 1.2 | RTP4      | 1.707317073 |
| CD741         | 1.38E-09 | 0.143629414 | 0.124 | 0.084 | 3.34E-05 | 1.2 | CD74      | 1.476190476 |
| MAP3K9        | 1.53E-09 | 0.187614165 | 0.212 | 0.16  | 3.69E-05 | 1.2 | MAP3K9    | 1.325       |
| IL12RB1       | 1.56E-09 | 0.106406372 | 0.039 | 0.019 | 3.76E-05 | 1.2 | IL12RB1   | 2.052631579 |
| EIF2S31       | 1.57E-09 | 0.18547815  | 0.345 | 0.288 | 3.80E-05 | 1.2 | EIF2S3    | 1.197916667 |
| BACH1         | 1.64E-09 | 0.237788506 | 0.36  | 0.304 | 3.95E-05 | 1.2 | BACH1     | 1.184210526 |
| ELK41         | 1.70E-09 | 0.120869237 | 0.098 | 0.063 | 4.09E-05 | 1.2 | ELK4      | 1.555555556 |
| NCL1          | 1.79E-09 | 0.284013404 | 0.215 | 0.166 | 4.31E-05 | 1.2 | NCL       | 1.295180723 |
| PLEKHM1       | 1.91E-09 | 0.113528084 | 0.069 | 0.041 | 4.62E-05 | 1.2 | PLEKHM1   | 1.682926829 |
| FBXW11        | 1.96E-09 | 0.222960614 | 0.343 | 0.288 | 4.72E-05 | 1.2 | FBXW11    | 1.190972222 |

|                |          |             |       |       |             |     |            |             |
|----------------|----------|-------------|-------|-------|-------------|-----|------------|-------------|
| USP31          | 1.96E-09 | 0.174089232 | 0.157 | 0.112 | 4.74E-05    | 1.2 | USP31      | 1.401785714 |
| YEATS2         | 2.18E-09 | 0.174543459 | 0.158 | 0.113 | 5.26E-05    | 1.2 | YEATS2     | 1.398230088 |
| TNFRSF10D      | 2.48E-09 | 0.130681351 | 0.065 | 0.037 | 5.97E-05    | 1.2 | TNFRSF10C  | 1.756756757 |
| RP11-122M14.31 | 2.85E-09 | 0.17681306  | 0.022 | 0.008 | 6.86E-05    | 1.2 | RP11-122M  | 2.75        |
| UBD            | 2.94E-09 | 0.494763047 | 0.125 | 0.086 | 7.09E-05    | 1.2 | UBD        | 1.453488372 |
| ST14           | 3.00E-09 | 0.192738227 | 0.223 | 0.172 | 7.22E-05    | 1.2 | ST14       | 1.296511628 |
| MPRIP          | 3.11E-09 | 0.202176167 | 0.314 | 0.257 | 7.50E-05    | 1.2 | MPRIP      | 1.221789883 |
| ARFGEF31       | 3.49E-09 | 0.191376769 | 0.331 | 0.272 | 8.42E-05    | 1.2 | ARFGEF3    | 1.216911765 |
| RP11-440L14.1  | 4.08E-09 | 0.100655017 | 0.062 | 0.035 | 9.84E-05    | 1.2 | RP11-440L  | 1.771428571 |
| EIF3J1         | 4.09E-09 | 0.173262547 | 0.165 | 0.12  | 9.86E-05    | 1.2 | EIF3J      | 1.375       |
| RNF181         | 4.21E-09 | 0.239494325 | 0.436 | 0.383 | 0.000101503 | 1.2 | RNF181     | 1.138381201 |
| GTF2F21        | 4.32E-09 | 0.161895485 | 0.142 | 0.101 | 0.000104115 | 1.2 | GTF2F2     | 1.405940594 |
| FTL1           | 4.35E-09 | 0.744864344 | 0.541 | 0.531 | 0.000104835 | 1.2 | FTL        | 1.018832392 |
| ZNF791         | 4.58E-09 | 0.158106546 | 0.134 | 0.094 | 0.000110321 | 1.2 | ZNF791     | 1.425531915 |
| SRSF121        | 4.77E-09 | 0.1246393   | 0.068 | 0.04  | 0.000115088 | 1.2 | SRSF12     | 1.7         |
| Sep-07         | 4.88E-09 | 0.182285258 | 0.425 | 0.37  | 0.000117625 | 1.2 | Sep-07     | 1.148648649 |
| GALNT18        | 5.03E-09 | 0.140088963 | 0.07  | 0.042 | 0.000121388 | 1.2 | GALNT18    | 1.666666667 |
| METAP11        | 5.69E-09 | 0.141249039 | 0.092 | 0.06  | 0.000137108 | 1.2 | METAP1     | 1.533333333 |
| SNRPD21        | 5.93E-09 | 0.155565959 | 0.706 | 0.67  | 0.000142902 | 1.2 | SNRPD2     | 1.053731343 |
| ACTG21         | 6.09E-09 | 0.137878637 | 0.023 | 0.009 | 0.000146916 | 1.2 | ACTG2      | 2.555555556 |
| ABTB2          | 6.16E-09 | 0.153888118 | 0.301 | 0.242 | 0.000148543 | 1.2 | ABTB2      | 1.243801653 |
| UBE3C          | 6.39E-09 | 0.200633915 | 0.289 | 0.237 | 0.000154189 | 1.2 | UBE3C      | 1.219409283 |
| PMM2           | 6.76E-09 | 0.168807145 | 0.105 | 0.07  | 0.000163092 | 1.2 | PMM2       | 1.5         |
| EPS15          | 6.78E-09 | 0.196896372 | 0.252 | 0.2   | 0.00016345  | 1.2 | EPS15      | 1.26        |
| MYH14          | 7.06E-09 | 0.168932713 | 0.205 | 0.157 | 0.000170233 | 1.2 | MYH14      | 1.305732484 |
| C8orf37-AS1    | 7.23E-09 | 0.225162387 | 0.293 | 0.242 | 0.000174426 | 1.2 | C8orf37-AS | 1.210743802 |
| PPP2R5C        | 7.37E-09 | 0.172404025 | 0.216 | 0.168 | 0.000177601 | 1.2 | PPP2R5C    | 1.285714286 |
| UQCRHL1        | 7.49E-09 | 0.163573974 | 0.229 | 0.179 | 0.000180563 | 1.2 | UQCRHL     | 1.279329609 |
| IRF6           | 7.76E-09 | 0.250863928 | 0.281 | 0.229 | 0.000187044 | 1.2 | IRF6       | 1.227074236 |
| CREB1          | 8.37E-09 | 0.163561244 | 0.238 | 0.186 | 0.000201767 | 1.2 | CREB1      | 1.279569892 |
| NPC11          | 8.89E-09 | 0.199786093 | 0.372 | 0.313 | 0.000214326 | 1.2 | NPC1       | 1.188498403 |
| WDR45B1        | 8.89E-09 | 0.191216421 | 0.263 | 0.212 | 0.000214341 | 1.2 | WDR45B     | 1.240566038 |
| TXNDC9         | 9.20E-09 | 0.145667903 | 0.152 | 0.11  | 0.000221724 | 1.2 | TXNDC9     | 1.381818182 |
| WBP51          | 9.51E-09 | 0.170287463 | 0.385 | 0.328 | 0.000229242 | 1.2 | WBP5       | 1.173780488 |
| SES2           | 9.77E-09 | 0.17949532  | 0.151 | 0.109 | 0.000235477 | 1.2 | SES2       | 1.385321101 |
| ARNTL2         | 1.01E-08 | 0.177574188 | 0.189 | 0.142 | 0.000243057 | 1.2 | ARNTL2     | 1.330985915 |
| ENY2           | 1.03E-08 | 0.272668011 | 0.432 | 0.387 | 0.00024773  | 1.2 | ENY2       | 1.11627907  |
| U2SURP1        | 1.05E-08 | 0.222434438 | 0.283 | 0.234 | 0.000254239 | 1.2 | U2SURP     | 1.209401709 |
| OSMR           | 1.05E-08 | 0.222317178 | 0.354 | 0.302 | 0.000254361 | 1.2 | OSMR       | 1.17218543  |
| FAM46B1        | 1.06E-08 | 0.119225654 | 0.082 | 0.052 | 0.000254582 | 1.2 | FAM46B     | 1.576923077 |
| CTB-147C22.9   | 1.07E-08 | 0.10490522  | 0.05  | 0.027 | 0.000256828 | 1.2 | CTB-147C2  | 1.851851852 |
| SOX9           | 1.14E-08 | 0.190450842 | 0.237 | 0.188 | 0.000275433 | 1.2 | SOX9       | 1.260638298 |
| SLC16A1-AS1    | 1.23E-08 | 0.147315765 | 0.098 | 0.065 | 0.000296385 | 1.2 | SLC16A1-A  | 1.507692308 |
| RPL101         | 1.25E-08 | 0.207622685 | 0.961 | 0.932 | 0.000301923 | 1.2 | RPL10      | 1.03111588  |
| MFSD14C        | 1.28E-08 | 0.194379137 | 0.214 | 0.166 | 0.000309676 | 1.2 | MFSD14C    | 1.289156627 |
| OSBPL91        | 1.31E-08 | 0.112622536 | 0.426 | 0.37  | 0.000316615 | 1.2 | OSBPL9     | 1.151351351 |
| DENND3         | 1.43E-08 | 0.117695962 | 0.049 | 0.027 | 0.000345237 | 1.2 | DENND3     | 1.814814815 |
| TRAPPC2        | 1.46E-08 | 0.11484813  | 0.088 | 0.057 | 0.000352395 | 1.2 | TRAPPC2    | 1.543859649 |
| LINC012351     | 1.57E-08 | 0.182881322 | 0.128 | 0.091 | 0.000379326 | 1.2 | LINC01235  | 1.406593407 |
| TATDN11        | 1.65E-08 | 0.155145398 | 0.26  | 0.208 | 0.000397508 | 1.2 | TATDN1     | 1.25        |
| PPP1R13L       | 1.70E-08 | 0.160404138 | 0.132 | 0.093 | 0.000409631 | 1.2 | PPP1R13L   | 1.419354839 |
| BIRC6-AS2      | 1.71E-08 | 0.226375146 | 0.25  | 0.202 | 0.000411839 | 1.2 | BIRC6-AS2  | 1.237623762 |

|            |          |             |       |       |             |     |            |             |
|------------|----------|-------------|-------|-------|-------------|-----|------------|-------------|
| MYO1D      | 1.87E-08 | 0.195581648 | 0.374 | 0.313 | 0.000451762 | 1.2 | MYO1D      | 1.194888179 |
| TLR2       | 1.88E-08 | 0.209721344 | 0.211 | 0.166 | 0.000453701 | 1.2 | TLR2       | 1.271084337 |
| MRPS18C    | 1.93E-08 | 0.191189599 | 0.19  | 0.146 | 0.000465587 | 1.2 | MRPS18C    | 1.301369863 |
| RPS121     | 1.95E-08 | 0.217122066 | 0.672 | 0.648 | 0.000470252 | 1.2 | RPS12      | 1.037037037 |
| FERMT21    | 2.00E-08 | 0.129609875 | 0.177 | 0.131 | 0.00048279  | 1.2 | FERMT2     | 1.351145038 |
| TIAM2      | 2.13E-08 | 0.265858004 | 0.272 | 0.226 | 0.000514297 | 1.2 | TIAM2      | 1.203539823 |
| GTF2IRD1   | 2.14E-08 | 0.188101325 | 0.21  | 0.163 | 0.000516711 | 1.2 | GTF2IRD1   | 1.288343558 |
| EML41      | 2.15E-08 | 0.206512374 | 0.208 | 0.162 | 0.000517618 | 1.2 | EML4       | 1.283950617 |
| ITGB5-AS11 | 2.19E-08 | 0.182880033 | 0.045 | 0.024 | 0.000529276 | 1.2 | ITGB5-AS1  | 1.875       |
| SH3BGRL3   | 2.20E-08 | 0.268282601 | 0.084 | 0.054 | 0.000530552 | 1.2 | SH3BGRL3   | 1.555555556 |
| SEC24D1    | 2.37E-08 | 0.126616657 | 0.242 | 0.191 | 0.000570473 | 1.2 | SEC24D     | 1.267015707 |
| ARHGEF10L1 | 2.48E-08 | 0.185085661 | 0.21  | 0.164 | 0.000597976 | 1.2 | ARHGEF10L1 | 1.280487805 |
| CNN31      | 2.48E-08 | 0.121821434 | 0.57  | 0.511 | 0.000598454 | 1.2 | CNN3       | 1.115459883 |
| TNFAIP1    | 2.70E-08 | 0.126863653 | 0.105 | 0.071 | 0.000651202 | 1.2 | TNFAIP1    | 1.478873239 |
| MARCKS1    | 2.89E-08 | 0.20137601  | 0.4   | 0.346 | 0.000697021 | 1.2 | MARCKS     | 1.156069364 |
| TLE2       | 2.95E-08 | 0.106921652 | 0.062 | 0.037 | 0.000712497 | 1.2 | TLE2       | 1.675675676 |
| IQCG1      | 2.97E-08 | 0.262019555 | 0.215 | 0.171 | 0.000716877 | 1.2 | IQCG       | 1.257309942 |
| AC016831.7 | 3.08E-08 | 0.255136893 | 0.301 | 0.253 | 0.000742685 | 1.2 | AC016831.7 | 1.18972332  |
| EEA11      | 3.21E-08 | 0.188604566 | 0.165 | 0.123 | 0.000775121 | 1.2 | EEA1       | 1.341463415 |
| CBR4       | 3.35E-08 | 0.199481989 | 0.28  | 0.231 | 0.000806592 | 1.2 | CBR4       | 1.212121212 |
| NSFL1C1    | 3.37E-08 | 0.146720403 | 0.104 | 0.071 | 0.000812534 | 1.2 | NSFL1C     | 1.464788732 |
| FBL1       | 3.38E-08 | 0.160568248 | 0.174 | 0.131 | 0.000814932 | 1.2 | FBL        | 1.328244275 |
| DSP        | 3.39E-08 | 0.211748443 | 0.399 | 0.352 | 0.000816363 | 1.2 | DSP        | 1.133522727 |
| HPS51      | 3.42E-08 | 0.176521175 | 0.178 | 0.135 | 0.000823776 | 1.2 | HPS5       | 1.318518519 |
| ZNF267     | 3.57E-08 | 0.169968303 | 0.205 | 0.159 | 0.000860002 | 1.2 | ZNF267     | 1.289308176 |
| UBE2V2     | 3.72E-08 | 0.196690602 | 0.295 | 0.246 | 0.000896246 | 1.2 | UBE2V2     | 1.199186992 |
| LINC01549  | 3.78E-08 | 0.137580943 | 0.033 | 0.016 | 0.000912274 | 1.2 | LINC01549  | 2.0625      |
| TIMM17A    | 3.79E-08 | 0.192164393 | 0.265 | 0.217 | 0.000914004 | 1.2 | TIMM17A    | 1.221198157 |
| MCTP2      | 3.79E-08 | 0.181765986 | 0.126 | 0.09  | 0.00091447  | 1.2 | MCTP2      | 1.4         |
| CPNE4      | 4.28E-08 | 0.162179078 | 0.059 | 0.035 | 0.001031551 | 1.2 | CPNE4      | 1.685714286 |
| CISD11     | 5.10E-08 | 0.161729233 | 0.172 | 0.131 | 0.001230515 | 1.2 | CISD1      | 1.312977099 |
| C12orf601  | 5.25E-08 | 0.139517103 | 0.104 | 0.071 | 0.001265678 | 1.2 | C12orf60   | 1.464788732 |
| PTPRJ1     | 5.63E-08 | 0.187432244 | 0.357 | 0.303 | 0.001357003 | 1.2 | PTPRJ      | 1.178217822 |
| TMPRSS3    | 5.83E-08 | 0.110239881 | 0.071 | 0.044 | 0.001406123 | 1.2 | TMPRSS3    | 1.613636364 |
| DOCK5      | 5.93E-08 | 0.247406677 | 0.251 | 0.205 | 0.001429488 | 1.2 | DOCK5      | 1.224390244 |
| FBXO46     | 6.03E-08 | 0.109308711 | 0.071 | 0.044 | 0.001453454 | 1.2 | FBXO46     | 1.613636364 |
| DDX5       | 6.08E-08 | 0.15487672  | 0.544 | 0.495 | 0.001466976 | 1.2 | DDX5       | 1.098989899 |
| KLC1       | 6.29E-08 | 0.126175959 | 0.069 | 0.043 | 0.001516472 | 1.2 | KLC1       | 1.604651163 |
| SOX61      | 6.37E-08 | 0.19295682  | 0.116 | 0.082 | 0.00153636  | 1.2 | SOX6       | 1.414634146 |
| RPL191     | 6.39E-08 | 0.182083978 | 0.927 | 0.899 | 0.001541708 | 1.2 | RPL19      | 1.031145717 |
| WNT9A      | 8.62E-08 | 0.101874373 | 0.052 | 0.03  | 0.002077765 | 1.2 | WNT9A      | 1.733333333 |
| LRCH1      | 1.03E-07 | 0.223141123 | 0.349 | 0.3   | 0.002487243 | 1.2 | LRCH1      | 1.163333333 |
| RPL18      | 1.09E-07 | 0.346720686 | 0.123 | 0.089 | 0.002622099 | 1.2 | RPL18      | 1.382022472 |
| GREB1L1    | 1.10E-07 | 0.2131496   | 0.136 | 0.1   | 0.002641391 | 1.2 | GREB1L     | 1.36        |
| TOMM201    | 1.10E-07 | 0.169961049 | 0.236 | 0.19  | 0.002662768 | 1.2 | TOMM20     | 1.242105263 |
| PSME41     | 1.18E-07 | 0.127642875 | 0.68  | 0.637 | 0.002851448 | 1.2 | PSME4      | 1.067503925 |
| FNBP41     | 1.20E-07 | 0.16815356  | 0.446 | 0.399 | 0.002887872 | 1.2 | FNBP4      | 1.117794486 |
| IARS       | 1.22E-07 | 0.199518766 | 0.172 | 0.132 | 0.002936382 | 1.2 | IARS       | 1.303030303 |
| TNFRSF10A  | 1.23E-07 | 0.159493229 | 0.096 | 0.066 | 0.002974445 | 1.2 | TNFRSF10A  | 1.454545455 |
| PFKP       | 1.27E-07 | 0.132891974 | 0.051 | 0.029 | 0.003074186 | 1.2 | PFKP       | 1.75862069  |
| KIT1       | 1.29E-07 | 0.195822127 | 0.218 | 0.172 | 0.003108075 | 1.2 | KIT        | 1.26744186  |
| HMOX2      | 1.30E-07 | 0.106431403 | 0.062 | 0.038 | 0.003130646 | 1.2 | HMOX2      | 1.631578947 |

|              |          |             |       |       |             |     |           |             |
|--------------|----------|-------------|-------|-------|-------------|-----|-----------|-------------|
| PLSCR2       | 1.32E-07 | 0.152199654 | 0.086 | 0.057 | 0.003176816 | 1.2 | PLSCR2    | 1.50877193  |
| ARPC2        | 1.36E-07 | 0.184289845 | 0.223 | 0.179 | 0.003285903 | 1.2 | ARPC2     | 1.245810056 |
| RPS21        | 1.41E-07 | 0.243358301 | 0.322 | 0.271 | 0.003394892 | 1.2 | RPS2      | 1.188191882 |
| CCDC50       | 1.44E-07 | 0.147432796 | 0.215 | 0.168 | 0.003469301 | 1.2 | CCDC50    | 1.279761905 |
| KEAP1        | 1.50E-07 | 0.247359462 | 0.049 | 0.028 | 0.003621688 | 1.2 | KEAP1     | 1.75        |
| LITAF        | 1.58E-07 | 0.174181509 | 0.482 | 0.434 | 0.003820945 | 1.2 | LITAF     | 1.110599078 |
| TPD521       | 1.67E-07 | 0.189686049 | 0.166 | 0.127 | 0.004030471 | 1.2 | TPD52     | 1.307086614 |
| CYYR1        | 1.70E-07 | 0.116824683 | 0.059 | 0.035 | 0.004110031 | 1.2 | CYYR1     | 1.685714286 |
| TRIM56       | 2.00E-07 | 0.179003248 | 0.191 | 0.15  | 0.004822324 | 1.2 | TRIM56    | 1.273333333 |
| PPP2R3A      | 2.04E-07 | 0.205153447 | 0.373 | 0.323 | 0.004924658 | 1.2 | PPP2R3A   | 1.154798762 |
| CLDND1       | 2.04E-07 | 0.175368377 | 0.245 | 0.199 | 0.00492705  | 1.2 | CLDND1    | 1.231155779 |
| DKC1         | 2.06E-07 | 0.101176472 | 0.076 | 0.049 | 0.004964031 | 1.2 | DKC1      | 1.551020408 |
| NCK1         | 2.19E-07 | 0.156436399 | 0.14  | 0.104 | 0.005286175 | 1.2 | NCK1      | 1.346153846 |
| APOLD11      | 2.32E-07 | 0.100996005 | 0.072 | 0.046 | 0.00559138  | 1.2 | APOLD1    | 1.565217391 |
| BFAR1        | 2.41E-07 | 0.139972664 | 0.181 | 0.14  | 0.005807169 | 1.2 | BFAR      | 1.292857143 |
| ZC3H151      | 2.49E-07 | 0.14166805  | 0.281 | 0.231 | 0.005996437 | 1.2 | ZC3H15    | 1.216450216 |
| YBX1         | 2.80E-07 | 0.191334736 | 0.336 | 0.291 | 0.006763609 | 1.2 | YBX1      | 1.154639175 |
| FOXK21       | 2.86E-07 | 0.175769918 | 0.264 | 0.218 | 0.006898376 | 1.2 | FOXK2     | 1.211009174 |
| PTPN12       | 2.87E-07 | 0.177155941 | 0.473 | 0.429 | 0.006913788 | 1.2 | PTPN12    | 1.102564103 |
| ZCCHC11      | 3.19E-07 | 0.193181193 | 0.248 | 0.206 | 0.007687607 | 1.2 | ZCCHC11   | 1.203883495 |
| TNF1         | 3.29E-07 | 0.241000102 | 0.115 | 0.082 | 0.00793984  | 1.2 | TNF       | 1.402439024 |
| CSDE11       | 3.31E-07 | 0.187052528 | 0.579 | 0.546 | 0.007979736 | 1.2 | CSDE1     | 1.06043956  |
| NR3C2        | 3.49E-07 | 0.211894864 | 0.113 | 0.082 | 0.008424762 | 1.2 | NR3C2     | 1.37804878  |
| ZFR          | 3.55E-07 | 0.213412249 | 0.367 | 0.32  | 0.008559604 | 1.2 | ZFR       | 1.146875    |
| NEMF         | 3.55E-07 | 0.184496207 | 0.306 | 0.261 | 0.008565211 | 1.2 | NEMF      | 1.172413793 |
| GCC2-AS1     | 3.56E-07 | 0.172649669 | 0.049 | 0.029 | 0.008589432 | 1.2 | GCC2-AS1  | 1.689655172 |
| LRP61        | 3.66E-07 | 0.136831047 | 0.232 | 0.187 | 0.008830069 | 1.2 | LRP6      | 1.240641711 |
| RP11-1H15.2  | 3.69E-07 | 0.121854854 | 0.102 | 0.071 | 0.008886626 | 1.2 | RP11-1H15 | 1.436619718 |
| RNF241       | 3.85E-07 | 0.168250145 | 0.379 | 0.328 | 0.009276033 | 1.2 | RNF24     | 1.155487805 |
| PSMB4        | 3.92E-07 | 0.162496834 | 0.148 | 0.112 | 0.009450139 | 1.2 | PSMB4     | 1.321428571 |
| LAMTOR5      | 4.87E-07 | 0.152844111 | 0.623 | 0.584 | 0.011734821 | 1.2 | LAMTOR5   | 1.066780822 |
| ATP11A       | 4.95E-07 | 0.147212298 | 0.084 | 0.056 | 0.011939593 | 1.2 | ATP11A    | 1.5         |
| RP11-66B24.5 | 5.64E-07 | 0.145724919 | 0.075 | 0.05  | 0.013603197 | 1.2 | RP11-66B2 | 1.5         |
| EIF2S2       | 5.68E-07 | 0.248554064 | 0.298 | 0.257 | 0.013688777 | 1.2 | EIF2S2    | 1.159533074 |
| UBAP2        | 5.70E-07 | 0.161522812 | 0.193 | 0.153 | 0.013732653 | 1.2 | UBAP2     | 1.261437908 |
| INTS6-AS11   | 5.94E-07 | 0.12646873  | 0.157 | 0.119 | 0.014315536 | 1.2 | INTS6-AS1 | 1.319327731 |
| FAM126B1     | 6.23E-07 | 0.184227733 | 0.17  | 0.132 | 0.015025048 | 1.2 | FAM126B   | 1.287878788 |
| RPS28        | 7.62E-07 | 0.319452975 | 0.115 | 0.084 | 0.01836884  | 1.2 | RPS28     | 1.369047619 |
| PHAX         | 7.83E-07 | 0.121481727 | 0.122 | 0.089 | 0.018892444 | 1.2 | PHAX      | 1.370786517 |
| LINGO1       | 7.88E-07 | 0.103838041 | 0.909 | 0.887 | 0.019007555 | 1.2 | LINGO1    | 1.024802706 |
| ZNF609       | 8.10E-07 | 0.216065525 | 0.522 | 0.488 | 0.019527421 | 1.2 | ZNF609    | 1.069672131 |
| KCNQ1OT1     | 8.16E-07 | 0.140783386 | 0.117 | 0.085 | 0.019685878 | 1.2 | KCNQ1OT1  | 1.376470588 |
| TTC1         | 8.34E-07 | 0.179847942 | 0.314 | 0.269 | 0.020118412 | 1.2 | TTC1      | 1.167286245 |
| POLR1D1      | 8.76E-07 | 0.149190225 | 0.267 | 0.222 | 0.021119848 | 1.2 | POLR1D    | 1.202702703 |
| PTPN2        | 8.79E-07 | 0.214164182 | 0.288 | 0.243 | 0.021202377 | 1.2 | PTPN2     | 1.185185185 |
| CNTNAP3B     | 9.16E-07 | 0.121008112 | 0.088 | 0.06  | 0.022098442 | 1.2 | CNTNAP3B  | 1.466666667 |
| ALDOA        | 9.19E-07 | 0.344384956 | 0.136 | 0.103 | 0.022162025 | 1.2 | ALDOA     | 1.32038835  |
| CD82         | 9.69E-07 | 0.153149176 | 0.075 | 0.05  | 0.023354832 | 1.2 | CD82      | 1.5         |
| COX7B1       | 9.80E-07 | 0.161944394 | 0.656 | 0.632 | 0.023629103 | 1.2 | COX7B     | 1.037974684 |
| EIF3K1       | 9.82E-07 | 0.139134048 | 0.378 | 0.327 | 0.023683325 | 1.2 | EIF3K     | 1.155963303 |
| DCAF6        | 1.10E-06 | 0.178207452 | 0.469 | 0.426 | 0.026616096 | 1.2 | DCAF6     | 1.100938967 |
| TPD52L1      | 1.11E-06 | 0.147089389 | 0.178 | 0.139 | 0.026716086 | 1.2 | TPD52L1   | 1.28057554  |



|               |           |             |       |       |             |     |           |             |
|---------------|-----------|-------------|-------|-------|-------------|-----|-----------|-------------|
| FUBP11        | 1.15E-06  | 0.130262879 | 0.236 | 0.191 | 0.02783443  | 1.2 | FUBP1     | 1.235602094 |
| SLC4A7        | 1.17E-06  | 0.18142787  | 0.325 | 0.277 | 0.028119833 | 1.2 | SLC4A7    | 1.173285199 |
| DPM1          | 1.29E-06  | 0.186532463 | 0.282 | 0.24  | 0.031142567 | 1.2 | DPM1      | 1.175       |
| SLC26A3       | 1.41E-06  | 0.247359545 | 0.791 | 0.79  | 0.03395167  | 1.2 | SLC26A3   | 1.001265823 |
| HLA-E         | 1.47E-06  | 0.195218927 | 0.121 | 0.089 | 0.035399936 | 1.2 | HLA-E     | 1.359550562 |
| PLIN21        | 1.52E-06  | 0.163747638 | 0.125 | 0.092 | 0.036602274 | 1.2 | PLIN2     | 1.358695652 |
| PSME2         | 1.58E-06  | 0.216125896 | 0.331 | 0.29  | 0.038013958 | 1.2 | PSME2     | 1.14137931  |
| C6orf481      | 1.60E-06  | 0.117138145 | 0.101 | 0.071 | 0.038472453 | 1.2 | C6orf48   | 1.422535211 |
| AFAP11        | 1.61E-06  | 0.178902018 | 0.115 | 0.084 | 0.038731407 | 1.2 | AFAP1     | 1.369047619 |
| PPL           | 1.61E-06  | 0.123951315 | 0.096 | 0.067 | 0.038938332 | 1.2 | PPL       | 1.432835821 |
| MED28         | 1.66E-06  | 0.118902396 | 0.11  | 0.079 | 0.039918137 | 1.2 | MED28     | 1.392405063 |
| C5orf341      | 1.71E-06  | 0.110308496 | 0.078 | 0.053 | 0.041324749 | 1.2 | C5orf34   | 1.471698113 |
| RAB9A1        | 1.75E-06  | 0.153303788 | 0.203 | 0.162 | 0.042218603 | 1.2 | RAB9A     | 1.25308642  |
| RP11-392O1.41 | 1.95E-06  | 0.119989355 | 0.04  | 0.023 | 0.047113907 | 1.2 | RP11-392O | 1.739130435 |
| CLIC1         | 2.05E-06  | 0.192366065 | 0.619 | 0.592 | 0.049428788 | 1.2 | CLIC1     | 1.045608108 |
| SAA1          | 0         | 2.116159501 | 0.99  | 0.698 | 0           | 1.3 | SAA1      | 1.418338109 |
| PI31          | 0         | 2.107640196 | 0.467 | 0.107 | 0           | 1.3 | PI3       | 4.364485981 |
| OVOS2         | 0         | 1.796696257 | 0.656 | 0.22  | 0           | 1.3 | OVOS2     | 2.981818182 |
| SLPI1         | 0         | 1.594133321 | 0.891 | 0.507 | 0           | 1.3 | SLPI      | 1.75739645  |
| DEFB11        | 0         | 1.538337021 | 0.773 | 0.398 | 0           | 1.3 | DEFB1     | 1.942211055 |
| TSHZ2         | 0         | 1.481989552 | 0.649 | 0.199 | 0           | 1.3 | TSHZ2     | 3.261306533 |
| LUCAT11       | 0         | 1.470357011 | 0.621 | 0.15  | 0           | 1.3 | LUCAT1    | 4.14        |
| CYP24A11      | 0         | 1.464911699 | 0.422 | 0.077 | 0           | 1.3 | CYP24A1   | 5.480519481 |
| RARRES1       | 0         | 1.464495421 | 0.624 | 0.16  | 0           | 1.3 | RARRES1   | 3.9         |
| SLC12A21      | 0         | 1.35687569  | 0.731 | 0.369 | 0           | 1.3 | SLC12A2   | 1.98102981  |
| SOD21         | 0         | 1.320360622 | 0.996 | 0.75  | 0           | 1.3 | SOD2      | 1.328       |
| BIRC32        | 0         | 1.264794408 | 0.886 | 0.578 | 0           | 1.3 | BIRC3     | 1.532871972 |
| LTF           | 0         | 1.257893102 | 0.803 | 0.285 | 0           | 1.3 | LTF       | 2.81754386  |
| CXCL171       | 0         | 1.230384812 | 0.334 | 0.074 | 0           | 1.3 | CXCL17    | 4.513513514 |
| RCAN12        | 0         | 1.19735208  | 0.755 | 0.351 | 0           | 1.3 | RCAN1     | 2.150997151 |
| EFNA51        | 0         | 1.132118479 | 0.642 | 0.236 | 0           | 1.3 | EFNA5     | 2.720338983 |
| SFRP12        | 0         | 1.127227264 | 0.596 | 0.179 | 0           | 1.3 | SFRP1     | 3.329608939 |
| PLCB11        | 0         | 1.10530553  | 0.559 | 0.182 | 0           | 1.3 | PLCB1     | 3.071428571 |
| SAA2-SAA41    | 0         | 1.068817898 | 0.52  | 0.14  | 0           | 1.3 | SAA2-SAA4 | 3.714285714 |
| ST6GALNAC52   | 0         | 1.064491822 | 0.476 | 0.15  | 0           | 1.3 | ST6GALNA  | 3.173333333 |
| VNN11         | 0         | 1.037221471 | 0.387 | 0.094 | 0           | 1.3 | VNN1      | 4.117021277 |
| LYN1          | 0         | 1.023782497 | 0.8   | 0.359 | 0           | 1.3 | LYN       | 2.228412256 |
| MAML22        | 0         | 1.0135753   | 0.821 | 0.366 | 0           | 1.3 | MAML2     | 2.243169399 |
| RP5-1198O20.4 | 0         | 1.00007178  | 0.332 | 0.051 | 0           | 1.3 | RP5-1198O | 6.509803922 |
| AC005152.31   | 0         | 0.989551421 | 0.287 | 0.054 | 0           | 1.3 | AC005152. | 5.314814815 |
| ARRDC32       | 0         | 0.986616919 | 0.737 | 0.34  | 0           | 1.3 | ARRDC3    | 2.167647059 |
| EGFR1         | 0         | 0.982529134 | 0.461 | 0.144 | 0           | 1.3 | EGFR      | 3.201388889 |
| AKR1C3        | 0         | 0.979002288 | 0.365 | 0.068 | 0           | 1.3 | AKR1C3    | 5.367647059 |
| MGST11        | 0         | 0.976406883 | 0.958 | 0.848 | 0           | 1.3 | MGST1     | 1.129716981 |
| ANXA13        | 0         | 0.971153616 | 0.932 | 0.569 | 0           | 1.3 | ANXA1     | 1.637961336 |
| L3MBTL41      | 0         | 0.948510729 | 0.47  | 0.141 | 0           | 1.3 | L3MBTL4   | 3.333333333 |
| SLC25A372     | 0         | 0.922660271 | 0.771 | 0.336 | 0           | 1.3 | SLC25A37  | 2.294642857 |
| PROM11        | 0         | 0.916845435 | 0.549 | 0.187 | 0           | 1.3 | PROM1     | 2.935828877 |
| LINC011521    | 0         | 0.859060868 | 0.238 | 0.037 | 0           | 1.3 | LINC01152 | 6.432432432 |
| CCL21         | 5.55E-299 | 2.182253303 | 0.549 | 0.222 | 1.34E-294   | 1.3 | CCL2      | 2.472972973 |
| TNFAIP61      | 8.44E-287 | 1.159185762 | 0.494 | 0.168 | 2.04E-282   | 1.3 | TNFAIP6   | 2.94047619  |
| C31           | 4.97E-285 | 0.819314379 | 0.399 | 0.115 | 1.20E-280   | 1.3 | C3        | 3.469565217 |

|               |           |             |       |       |           |     |           |             |
|---------------|-----------|-------------|-------|-------|-----------|-----|-----------|-------------|
| WFDC21        | 1.63E-284 | 1.692722017 | 0.642 | 0.285 | 3.92E-280 | 1.3 | WFDC2     | 2.252631579 |
| SORBS11       | 1.56E-283 | 0.9044757   | 0.478 | 0.163 | 3.76E-279 | 1.3 | SORBS1    | 2.932515337 |
| CCL282        | 2.68E-281 | 0.9467245   | 0.708 | 0.322 | 6.45E-277 | 1.3 | CCL28     | 2.198757764 |
| SLC34A21      | 5.76E-279 | 0.8466063   | 0.382 | 0.108 | 1.39E-274 | 1.3 | SLC34A2   | 3.537037037 |
| RPS72         | 2.95E-273 | 0.7216962   | 0.962 | 0.911 | 7.11E-269 | 1.3 | RPS7      | 1.055982437 |
| CHI3L2        | 6.88E-273 | 0.9282846   | 0.579 | 0.23  | 1.66E-268 | 1.3 | CHI3L2    | 2.517391304 |
| ST8SIA1       | 2.81E-271 | 0.7586075   | 0.297 | 0.069 | 6.78E-267 | 1.3 | ST8SIA1   | 4.304347826 |
| MTHFD2L1      | 1.68E-270 | 0.9640361   | 0.721 | 0.362 | 4.04E-266 | 1.3 | MTHFD2L   | 1.991712707 |
| RPS27A2       | 3.05E-270 | 0.6715851   | 0.979 | 0.97  | 7.35E-266 | 1.3 | RPS27A    | 1.009278351 |
| SLC28A31      | 1.81E-260 | 0.7744168   | 0.44  | 0.144 | 4.36E-256 | 1.3 | SLC28A3   | 3.055555556 |
| CYP7B1        | 4.33E-260 | 1.093486    | 0.512 | 0.195 | 1.05E-255 | 1.3 | CYP7B1    | 2.625641026 |
| KIT2          | 2.76E-259 | 0.8415138   | 0.436 | 0.143 | 6.64E-255 | 1.3 | KIT       | 3.048951049 |
| SEMA6A2       | 8.14E-256 | 0.9806467   | 0.503 | 0.187 | 1.96E-251 | 1.3 | SEMA6A    | 2.689839572 |
| GUCY1A31      | 9.19E-246 | 0.7233194   | 0.326 | 0.088 | 2.22E-241 | 1.3 | GUCY1A3   | 3.704545455 |
| B2M2          | 1.04E-245 | 0.7826485   | 0.979 | 0.971 | 2.51E-241 | 1.3 | B2M       | 1.008238929 |
| RP4-678D15.11 | 2.50E-244 | 0.7471375   | 0.264 | 0.06  | 6.03E-240 | 1.3 | RP4-678D1 | 4.4         |
| MGAM21        | 6.37E-242 | 0.9093916   | 0.419 | 0.139 | 1.54E-237 | 1.3 | MGAM2     | 3.014388489 |
| CRYAB2        | 2.64E-240 | 0.7908976   | 0.55  | 0.221 | 6.36E-236 | 1.3 | CRYAB     | 2.488687783 |
| FBLN5         | 9.53E-236 | 1.019721    | 0.407 | 0.136 | 2.30E-231 | 1.3 | FBLN5     | 2.992647059 |
| HSPA81        | 5.85E-235 | 1.037306    | 0.71  | 0.427 | 1.41E-230 | 1.3 | HSPA8     | 1.662763466 |
| MMP72         | 5.07E-233 | 0.9731212   | 0.38  | 0.122 | 1.22E-228 | 1.3 | MMP7      | 3.114754098 |
| FRMD4A1       | 1.54E-232 | 0.8075167   | 0.573 | 0.24  | 3.72E-228 | 1.3 | FRMD4A    | 2.3875      |
| GLIS32        | 1.67E-232 | 0.8124677   | 0.397 | 0.131 | 4.03E-228 | 1.3 | GLIS3     | 3.030534351 |
| PLXDC2        | 1.10E-229 | 0.7121401   | 0.333 | 0.097 | 2.65E-225 | 1.3 | PLXDC2    | 3.432989691 |
| EVA1C         | 2.69E-229 | 0.8040843   | 0.589 | 0.261 | 6.48E-225 | 1.3 | EVA1C     | 2.256704981 |
| ADAMTS92      | 6.84E-228 | 0.9384859   | 0.475 | 0.179 | 1.65E-223 | 1.3 | ADAMTS9   | 2.653631285 |
| PDE4B2        | 2.13E-224 | 0.5497585   | 0.885 | 0.471 | 5.13E-220 | 1.3 | PDE4B     | 1.878980892 |
| ALDH1A32      | 6.97E-223 | 0.9443188   | 0.56  | 0.241 | 1.68E-218 | 1.3 | ALDH1A3   | 2.323651452 |
| NFIB1         | 4.08E-221 | 0.8171117   | 0.932 | 0.717 | 9.83E-217 | 1.3 | NFIB      | 1.29986053  |
| PIGR2         | 6.70E-218 | 0.8174345   | 0.524 | 0.214 | 1.61E-213 | 1.3 | PIGR      | 2.448598131 |
| SLC26A2       | 2.88E-217 | 0.7293254   | 0.251 | 0.06  | 6.94E-213 | 1.3 | SLC26A2   | 4.183333333 |
| PAPSS12       | 7.69E-214 | 0.7814693   | 0.483 | 0.197 | 1.85E-209 | 1.3 | PAPSS1    | 2.45177665  |
| SVIL2         | 1.35E-212 | 0.744079    | 0.856 | 0.551 | 3.24E-208 | 1.3 | SVIL      | 1.55353902  |
| PIK3R1        | 3.06E-212 | 0.8737731   | 0.401 | 0.143 | 7.38E-208 | 1.3 | PIK3R1    | 2.804195804 |
| ITGB82        | 8.25E-209 | 0.7823841   | 0.786 | 0.461 | 1.99E-204 | 1.3 | ITGB8     | 1.704989154 |
| IFI161        | 3.72E-208 | 0.6411351   | 0.343 | 0.108 | 8.96E-204 | 1.3 | IFI16     | 3.175925926 |
| VNN3          | 3.65E-207 | 0.8452252   | 0.351 | 0.113 | 8.80E-203 | 1.3 | VNN3      | 3.10619469  |
| PLEKHS1       | 9.41E-207 | 0.6982924   | 0.333 | 0.104 | 2.27E-202 | 1.3 | PLEKHS1   | 3.201923077 |
| ADAMTS9-AS21  | 5.51E-206 | 0.7115196   | 0.385 | 0.133 | 1.33E-201 | 1.3 | ADAMTS9-  | 2.894736842 |
| TPD52L11      | 2.03E-201 | 0.7201487   | 0.349 | 0.116 | 4.89E-197 | 1.3 | TPD52L1   | 3.00862069  |
| RPS232        | 6.34E-201 | 0.5530691   | 0.977 | 0.967 | 1.53E-196 | 1.3 | RPS23     | 1.010341262 |
| AKR1C1        | 2.73E-200 | 0.7873215   | 0.228 | 0.054 | 6.58E-196 | 1.3 | AKR1C1    | 4.222222222 |
| ARHGAP26      | 4.30E-198 | 0.7097238   | 0.907 | 0.636 | 1.04E-193 | 1.3 | ARHGAP26  | 1.426100629 |
| HDAC91        | 3.07E-197 | 0.7246146   | 0.318 | 0.099 | 7.41E-193 | 1.3 | HDAC9     | 3.212121212 |
| SLC6A142      | 1.99E-196 | 0.7226555   | 0.287 | 0.083 | 4.80E-192 | 1.3 | SLC6A14   | 3.457831325 |
| CTD-2015G9.2  | 3.07E-195 | 0.5419261   | 0.251 | 0.065 | 7.40E-191 | 1.3 | CTD-2015G | 3.861538462 |
| GLRX2         | 4.72E-192 | 0.7272447   | 0.555 | 0.255 | 1.14E-187 | 1.3 | GLRX      | 2.176470588 |
| SKAP21        | 4.97E-190 | 0.699132    | 0.426 | 0.167 | 1.20E-185 | 1.3 | SKAP2     | 2.550898204 |
| RPL142        | 1.79E-189 | 0.5264059   | 0.975 | 0.959 | 4.31E-185 | 1.3 | RPL14     | 1.016684046 |
| MEIS21        | 3.61E-188 | 0.6861104   | 0.324 | 0.105 | 8.70E-184 | 1.3 | MEIS2     | 3.085714286 |
| DTNB1         | 4.61E-188 | 0.7466784   | 0.705 | 0.393 | 1.11E-183 | 1.3 | DTNB      | 1.79389313  |
| ACAT22        | 1.64E-187 | 0.8321563   | 0.426 | 0.173 | 3.95E-183 | 1.3 | ACAT2     | 2.462427746 |

|             |           |           |       |       |           |     |           |             |
|-------------|-----------|-----------|-------|-------|-----------|-----|-----------|-------------|
| SASH12      | 3.31E-186 | 0.67592   | 0.371 | 0.133 | 7.98E-182 | 1.3 | SASH1     | 2.789473684 |
| SEMA6A-AS11 | 9.31E-185 | 0.7407268 | 0.324 | 0.106 | 2.24E-180 | 1.3 | SEMA6A-A' | 3.056603774 |
| ANKRD36C1   | 4.54E-184 | 0.9221852 | 0.72  | 0.426 | 1.10E-179 | 1.3 | ANKRD36C  | 1.690140845 |
| PDZK1IP1    | 2.23E-182 | 0.7162802 | 0.254 | 0.07  | 5.38E-178 | 1.3 | PDZK1IP1  | 3.628571429 |
| EHBP11      | 1.18E-181 | 0.7659506 | 0.482 | 0.214 | 2.83E-177 | 1.3 | EHBP1     | 2.252336449 |
| NPAS21      | 1.52E-178 | 0.8241179 | 0.632 | 0.34  | 3.67E-174 | 1.3 | NPAS2     | 1.858823529 |
| RPL62       | 3.50E-178 | 0.538728  | 0.967 | 0.947 | 8.43E-174 | 1.3 | RPL6      | 1.021119324 |
| C5orf462    | 1.15E-177 | 0.6447766 | 0.298 | 0.095 | 2.77E-173 | 1.3 | C5orf46   | 3.136842105 |
| PHLDA1      | 1.80E-176 | 0.5528044 | 0.253 | 0.072 | 4.35E-172 | 1.3 | PHLDA1    | 3.513888889 |
| ZNF521      | 1.41E-175 | 0.5559512 | 0.254 | 0.072 | 3.40E-171 | 1.3 | ZNF521    | 3.527777778 |
| APOO2       | 4.00E-175 | 0.4630318 | 0.976 | 0.965 | 9.64E-171 | 1.3 | APOO      | 1.011398964 |
| RPL52       | 7.41E-174 | 0.5197665 | 0.968 | 0.938 | 1.79E-169 | 1.3 | RPL5      | 1.031982942 |
| FAM177B1    | 1.08E-173 | 0.9921688 | 0.757 | 0.46  | 2.62E-169 | 1.3 | FAM177B   | 1.645652174 |
| TRIM24      | 1.71E-173 | 0.5755775 | 0.384 | 0.145 | 4.13E-169 | 1.3 | TRIM2     | 2.648275862 |
| TACC11      | 1.40E-172 | 0.7206846 | 0.372 | 0.143 | 3.37E-168 | 1.3 | TACC1     | 2.601398601 |
| MT-CO22     | 3.83E-171 | 0.5852096 | 0.986 | 0.986 | 9.23E-167 | 1.3 | MT-CO2    | 1           |
| RPL72       | 2.49E-170 | 0.7294833 | 0.959 | 0.866 | 6.00E-166 | 1.3 | RPL7      | 1.1073903   |
| LINC012352  | 2.90E-168 | 0.5760779 | 0.253 | 0.074 | 6.98E-164 | 1.3 | LINC01235 | 3.418918919 |
| PRDX11      | 7.99E-168 | 0.8924123 | 0.838 | 0.665 | 1.93E-163 | 1.3 | PRDX1     | 1.260150376 |
| RPL112      | 1.79E-167 | 0.4972377 | 0.972 | 0.957 | 4.33E-163 | 1.3 | RPL11     | 1.015673981 |
| CD591       | 4.98E-165 | 0.5767924 | 0.966 | 0.871 | 1.20E-160 | 1.3 | CD59      | 1.109070034 |
| GALNT15     | 2.52E-164 | 0.7892509 | 0.209 | 0.054 | 6.08E-160 | 1.3 | GALNT15   | 3.87037037  |
| MT-CO32     | 2.53E-163 | 0.4706098 | 0.992 | 0.996 | 6.11E-159 | 1.3 | MT-CO3    | 0.995983936 |
| ADGRF1      | 7.44E-161 | 0.3988262 | 0.129 | 0.021 | 1.79E-156 | 1.3 | ADGRF1    | 6.142857143 |
| HS3ST41     | 1.05E-160 | 0.7715139 | 0.398 | 0.163 | 2.52E-156 | 1.3 | HS3ST4    | 2.441717791 |
| SORBS22     | 1.86E-160 | 0.7176834 | 0.635 | 0.348 | 4.48E-156 | 1.3 | SORBS2    | 1.824712644 |
| LINC01184   | 2.11E-160 | 0.639628  | 0.326 | 0.119 | 5.09E-156 | 1.3 | LINC01184 | 2.739495798 |
| MFGE81      | 7.51E-160 | 0.8122977 | 0.252 | 0.077 | 1.81E-155 | 1.3 | MFGE8     | 3.272727273 |
| FDPS        | 7.60E-159 | 0.7752646 | 0.681 | 0.426 | 1.83E-154 | 1.3 | FDPS      | 1.598591549 |
| PPIA2       | 3.27E-158 | 0.5647072 | 0.909 | 0.792 | 7.89E-154 | 1.3 | PPIA      | 1.147727273 |
| PTPN21      | 9.82E-156 | 0.6718423 | 0.473 | 0.218 | 2.37E-151 | 1.3 | PTPN2     | 2.169724771 |
| SGK11       | 2.05E-154 | 0.5858006 | 0.267 | 0.086 | 4.95E-150 | 1.3 | SGK1      | 3.104651163 |
| NPM12       | 7.89E-154 | 0.5384151 | 0.902 | 0.691 | 1.90E-149 | 1.3 | NPM1      | 1.305354559 |
| RPL322      | 9.10E-154 | 0.4572391 | 0.979 | 0.975 | 2.20E-149 | 1.3 | RPL32     | 1.004102564 |
| MAP3K132    | 2.35E-151 | 0.5772301 | 0.838 | 0.594 | 5.67E-147 | 1.3 | MAP3K13   | 1.410774411 |
| DMD2        | 4.89E-150 | 0.5921736 | 0.494 | 0.232 | 1.18E-145 | 1.3 | DMD       | 2.129310345 |
| SOX10       | 4.93E-149 | 0.4639521 | 0.184 | 0.046 | 1.19E-144 | 1.3 | SOX10     | 4           |
| RPL302      | 9.53E-149 | 0.4220357 | 0.973 | 0.951 | 2.30E-144 | 1.3 | RPL30     | 1.023133544 |
| LINC011982  | 3.10E-148 | 0.585491  | 0.342 | 0.13  | 7.47E-144 | 1.3 | LINC01198 | 2.630769231 |
| S100A8      | 1.15E-147 | 1.264406  | 0.282 | 0.099 | 2.78E-143 | 1.3 | S100A8    | 2.848484848 |
| BRINP11     | 2.20E-147 | 0.8196213 | 0.26  | 0.085 | 5.29E-143 | 1.3 | BRINP1    | 3.058823529 |
| RPL35A2     | 1.14E-144 | 0.4546318 | 0.975 | 0.952 | 2.74E-140 | 1.3 | RPL35A    | 1.024159664 |
| RPL43       | 3.90E-144 | 0.4883363 | 0.951 | 0.883 | 9.40E-140 | 1.3 | RPL4      | 1.077010193 |
| RPS62       | 2.87E-142 | 0.4501236 | 0.979 | 0.978 | 6.92E-138 | 1.3 | RPS6      | 1.001022495 |
| ASS1        | 4.10E-142 | 0.5433998 | 0.23  | 0.071 | 9.89E-138 | 1.3 | ASS1      | 3.23943662  |
| NCOA72      | 4.25E-142 | 0.5807004 | 0.702 | 0.408 | 1.02E-137 | 1.3 | NCOA7     | 1.720588235 |
| EEF1B22     | 3.29E-141 | 0.5915344 | 0.876 | 0.711 | 7.92E-137 | 1.3 | EEF1B2    | 1.232067511 |
| RAPGEF51    | 1.48E-140 | 0.6938615 | 0.573 | 0.31  | 3.57E-136 | 1.3 | RAPGEF5   | 1.848387097 |
| RPL212      | 1.78E-140 | 0.5045762 | 0.948 | 0.86  | 4.29E-136 | 1.3 | RPL21     | 1.102325581 |
| FZD7        | 3.37E-140 | 0.3508707 | 0.136 | 0.027 | 8.12E-136 | 1.3 | FZD7      | 5.037037037 |
| STOX21      | 4.20E-140 | 0.4881573 | 0.237 | 0.074 | 1.01E-135 | 1.3 | STOX2     | 3.202702703 |
| PFDN42      | 1.15E-139 | 0.6067932 | 0.568 | 0.307 | 2.78E-135 | 1.3 | PFDN4     | 1.850162866 |

|             |           |           |       |       |           |     |           |             |
|-------------|-----------|-----------|-------|-------|-----------|-----|-----------|-------------|
| MAP1B2      | 1.14E-138 | 0.619031  | 0.491 | 0.241 | 2.74E-134 | 1.3 | MAP1B     | 2.037344398 |
| SPIRE12     | 2.30E-138 | 0.6312027 | 0.469 | 0.226 | 5.55E-134 | 1.3 | SPIRE1    | 2.075221239 |
| MAMDC22     | 1.92E-137 | 0.5263194 | 0.941 | 0.839 | 4.63E-133 | 1.3 | MAMDC2    | 1.121573302 |
| C10orf10    | 1.19E-136 | 0.4628759 | 0.256 | 0.085 | 2.88E-132 | 1.3 | C10orf10  | 3.011764706 |
| LINGO21     | 5.18E-135 | 0.7739808 | 0.122 | 0.023 | 1.25E-130 | 1.3 | LINGO2    | 5.304347826 |
| SERPINB7    | 8.01E-134 | 0.6414666 | 0.236 | 0.076 | 1.93E-129 | 1.3 | SERPINB7  | 3.105263158 |
| NFKBIZ2     | 4.53E-133 | 0.5401117 | 0.798 | 0.529 | 1.09E-128 | 1.3 | NFKBIZ    | 1.508506616 |
| RPS172      | 7.13E-132 | 0.4248989 | 0.953 | 0.94  | 1.72E-127 | 1.3 | RPS17     | 1.013829787 |
| ECHDC1      | 2.22E-130 | 0.5554088 | 0.401 | 0.182 | 5.35E-126 | 1.3 | ECHDC1    | 2.203296703 |
| CALD12      | 2.23E-130 | 0.4893589 | 0.541 | 0.268 | 5.37E-126 | 1.3 | CALD1     | 2.018656716 |
| CLIP21      | 1.95E-126 | 0.5860177 | 0.295 | 0.113 | 4.70E-122 | 1.3 | CLIP2     | 2.610619469 |
| PSTPIP2     | 3.10E-126 | 0.6191528 | 0.427 | 0.2   | 7.46E-122 | 1.3 | PSTPIP2   | 2.135       |
| CACHD1      | 6.35E-126 | 0.4098158 | 0.154 | 0.038 | 1.53E-121 | 1.3 | CACHD1    | 4.052631579 |
| SGPP21      | 5.37E-125 | 0.5055719 | 0.259 | 0.092 | 1.29E-120 | 1.3 | SGPP2     | 2.815217391 |
| PSMB72      | 7.43E-125 | 0.6773353 | 0.659 | 0.427 | 1.79E-120 | 1.3 | PSMB7     | 1.543325527 |
| RSL24D12    | 9.17E-125 | 0.5633997 | 0.762 | 0.534 | 2.21E-120 | 1.3 | RSL24D1   | 1.426966292 |
| UAP11       | 1.14E-124 | 0.5800247 | 0.311 | 0.125 | 2.76E-120 | 1.3 | UAP1      | 2.488       |
| SUB12       | 9.95E-124 | 0.5590028 | 0.809 | 0.617 | 2.40E-119 | 1.3 | SUB1      | 1.311183144 |
| SLC47A12    | 1.58E-123 | 0.4650979 | 0.933 | 0.891 | 3.82E-119 | 1.3 | SLC47A1   | 1.047138047 |
| AGAP1       | 1.37E-122 | 0.6416766 | 0.72  | 0.48  | 3.31E-118 | 1.3 | AGAP1     | 1.5         |
| DAPK22      | 7.30E-122 | 0.4865793 | 0.443 | 0.207 | 1.76E-117 | 1.3 | DAPK2     | 2.140096618 |
| RPSA2       | 1.75E-120 | 0.4920808 | 0.92  | 0.796 | 4.22E-116 | 1.3 | RPSA      | 1.155778894 |
| ENO12       | 9.60E-119 | 0.7541512 | 0.596 | 0.356 | 2.32E-114 | 1.3 | ENO1      | 1.674157303 |
| NACA3       | 1.44E-118 | 0.4053555 | 0.951 | 0.904 | 3.48E-114 | 1.3 | NACA      | 1.05199115  |
| GABRP2      | 3.42E-118 | 0.4980675 | 0.487 | 0.238 | 8.24E-114 | 1.3 | GABRP     | 2.046218487 |
| KYNU        | 4.22E-118 | 0.6300609 | 0.444 | 0.217 | 1.02E-113 | 1.3 | KYNU      | 2.046082949 |
| CA81        | 3.33E-117 | 0.5205548 | 0.44  | 0.21  | 8.03E-113 | 1.3 | CA8       | 2.095238095 |
| CLU10S      | 7.28E-117 | 0.3746511 | 0.141 | 0.034 | 1.76E-112 | 1.3 | CLU10S    | 4.147058824 |
| KRT6B1      | 5.75E-116 | 0.4449939 | 0.163 | 0.044 | 1.39E-111 | 1.3 | KRT6B     | 3.704545455 |
| DIAPH2      | 3.12E-115 | 0.5994179 | 0.38  | 0.178 | 7.53E-111 | 1.3 | DIAPH2    | 2.134831461 |
| CTSS1       | 5.93E-115 | 0.538846  | 0.294 | 0.119 | 1.43E-110 | 1.3 | CTSS      | 2.470588235 |
| PRICKLE12   | 9.49E-115 | 0.406069  | 0.155 | 0.041 | 2.29E-110 | 1.3 | PRICKLE1  | 3.780487805 |
| TBCA2       | 1.08E-114 | 0.5887413 | 0.737 | 0.519 | 2.60E-110 | 1.3 | TBCA      | 1.420038536 |
| RIN2        | 1.31E-113 | 0.5880177 | 0.392 | 0.188 | 3.16E-109 | 1.3 | RIN2      | 2.085106383 |
| SERPINB3    | 2.44E-113 | 0.7905193 | 0.129 | 0.03  | 5.88E-109 | 1.3 | SERPINB3  | 4.3         |
| DOCK7       | 5.67E-113 | 0.5259141 | 0.316 | 0.135 | 1.37E-108 | 1.3 | DOCK7     | 2.340740741 |
| AC159540.11 | 1.85E-112 | 0.5979169 | 0.241 | 0.088 | 4.47E-108 | 1.3 | AC159540. | 2.738636364 |
| EPS82       | 5.90E-111 | 0.6217455 | 0.526 | 0.295 | 1.42E-106 | 1.3 | EPS8      | 1.783050847 |
| AKR1C2      | 5.12E-110 | 0.3801781 | 0.135 | 0.033 | 1.23E-105 | 1.3 | AKR1C2    | 4.090909091 |
| CNKSR31     | 8.85E-110 | 0.7147083 | 0.511 | 0.283 | 2.13E-105 | 1.3 | CNKSR3    | 1.80565371  |
| S100A111    | 1.33E-109 | 0.5922655 | 0.879 | 0.705 | 3.21E-105 | 1.3 | S100A11   | 1.246808511 |
| AKR1B1      | 2.02E-109 | 0.5557379 | 0.14  | 0.036 | 4.88E-105 | 1.3 | AKR1B1    | 3.888888889 |
| RPL7A2      | 9.47E-109 | 0.396614  | 0.966 | 0.957 | 2.28E-104 | 1.3 | RPL7A     | 1.009404389 |
| LRP1B       | 1.91E-108 | 1.289077  | 0.306 | 0.136 | 4.59E-104 | 1.3 | LRP1B     | 2.25        |
| CHPT1       | 2.30E-108 | 0.7390185 | 0.507 | 0.287 | 5.55E-104 | 1.3 | CHPT1     | 1.766550523 |
| RPS132      | 8.14E-108 | 0.5988411 | 0.854 | 0.684 | 1.96E-103 | 1.3 | RPS13     | 1.248538012 |
| SAA41       | 1.92E-107 | 0.4307569 | 0.283 | 0.113 | 4.63E-103 | 1.3 | SAA4      | 2.504424779 |
| RPS3A2      | 2.15E-106 | 0.4176699 | 0.941 | 0.894 | 5.19E-102 | 1.3 | RPS3A     | 1.052572707 |
| RPS202      | 2.44E-106 | 0.5526822 | 0.951 | 0.921 | 5.88E-102 | 1.3 | RPS20     | 1.03257329  |
| SERPINB4    | 3.15E-105 | 0.7539195 | 0.137 | 0.035 | 7.59E-101 | 1.3 | SERPINB4  | 3.914285714 |
| UQCRH2      | 4.38E-105 | 0.4404545 | 0.868 | 0.734 | 1.06E-100 | 1.3 | UQCRH     | 1.182561308 |
| SLC39A142   | 4.72E-105 | 0.5302942 | 0.373 | 0.177 | 1.14E-100 | 1.3 | SLC39A14  | 2.107344633 |

|                   |           |           |       |       |           |     |           |             |
|-------------------|-----------|-----------|-------|-------|-----------|-----|-----------|-------------|
| ZC3H12C1          | 5.02E-105 | 0.4602319 | 0.256 | 0.099 | 1.21E-100 | 1.3 | ZC3H12C   | 2.585858586 |
| CNTNAP3B1         | 1.57E-104 | 0.3733508 | 0.167 | 0.05  | 3.79E-100 | 1.3 | CNTNAP3B  | 3.34        |
| LDHB2             | 2.75E-104 | 0.4783196 | 0.762 | 0.539 | 6.62E-100 | 1.3 | LDHB      | 1.413729128 |
| NALCN             | 1.84E-103 | 0.4176044 | 0.193 | 0.064 | 4.43E-99  | 1.3 | NALCN     | 3.015625    |
| EIF3E2            | 2.81E-103 | 0.4225025 | 0.784 | 0.549 | 6.76E-99  | 1.3 | EIF3E     | 1.428051002 |
| HSP90AA12         | 3.14E-103 | 0.4741609 | 0.933 | 0.845 | 7.57E-99  | 1.3 | HSP90AA1  | 1.104142012 |
| RP11-536O18.11    | 4.55E-103 | 0.3330211 | 0.154 | 0.044 | 1.10E-98  | 1.3 | RP11-536O | 3.5         |
| RPS252            | 4.87E-103 | 0.5078678 | 0.876 | 0.722 | 1.17E-98  | 1.3 | RPS25     | 1.213296399 |
| PLEKHA62          | 3.11E-102 | 0.4289381 | 0.916 | 0.822 | 7.50E-98  | 1.3 | PLEKHA6   | 1.114355231 |
| BTF32             | 3.77E-102 | 0.3881594 | 0.948 | 0.881 | 9.08E-98  | 1.3 | BTF3      | 1.076049943 |
| CISD12            | 4.69E-102 | 0.4198516 | 0.281 | 0.116 | 1.13E-97  | 1.3 | CISD1     | 2.422413793 |
| RPS272            | 5.34E-102 | 0.5891739 | 0.801 | 0.616 | 1.29E-97  | 1.3 | RPS27     | 1.300324675 |
| PPP2R3A1          | 2.29E-101 | 0.5726517 | 0.525 | 0.303 | 5.51E-97  | 1.3 | PPP2R3A   | 1.732673267 |
| RPL23A2           | 4.50E-101 | 0.6241997 | 0.75  | 0.554 | 1.09E-96  | 1.3 | RPL23A    | 1.353790614 |
| EIF4A12           | 6.82E-101 | 0.5025268 | 0.611 | 0.378 | 1.65E-96  | 1.3 | EIF4A1    | 1.616402116 |
| EIF4E21           | 4.35E-100 | 0.5177356 | 0.518 | 0.299 | 1.05E-95  | 1.3 | EIF4E2    | 1.732441472 |
| ZMYM42            | 3.60E-99  | 0.4322937 | 0.914 | 0.804 | 8.68E-95  | 1.3 | ZMYM4     | 1.13681592  |
| CELF22            | 6.58E-98  | 0.4619804 | 0.264 | 0.107 | 1.59E-93  | 1.3 | CELF2     | 2.46728972  |
| ARHGAP44          | 9.84E-98  | 0.545146  | 0.338 | 0.159 | 2.37E-93  | 1.3 | ARHGAP44  | 2.125786164 |
| RPL232            | 3.77E-97  | 0.3534783 | 0.957 | 0.911 | 9.08E-93  | 1.3 | RPL23     | 1.050493963 |
| PGK11             | 4.83E-97  | 0.5808931 | 0.734 | 0.533 | 1.17E-92  | 1.3 | PGK1      | 1.377110694 |
| S100A132          | 5.80E-97  | 0.5607457 | 0.694 | 0.492 | 1.40E-92  | 1.3 | S100A13   | 1.410569106 |
| ELF51             | 2.29E-96  | 0.4050427 | 0.293 | 0.125 | 5.53E-92  | 1.3 | ELF5      | 2.344       |
| S100A9            | 1.44E-95  | 0.7647583 | 0.107 | 0.024 | 3.46E-91  | 1.3 | S100A9    | 4.458333333 |
| PLSCR11           | 1.51E-95  | 0.452232  | 0.358 | 0.173 | 3.64E-91  | 1.3 | PLSCR1    | 2.069364162 |
| TXNIP             | 1.66E-95  | 0.5367358 | 0.593 | 0.357 | 4.01E-91  | 1.3 | TXNIP     | 1.661064426 |
| MAP4K41           | 1.37E-94  | 0.5149849 | 0.414 | 0.214 | 3.31E-90  | 1.3 | MAP4K4    | 1.934579439 |
| BDNF-AS2          | 2.76E-94  | 0.5471736 | 0.7   | 0.482 | 6.65E-90  | 1.3 | BDNF-AS   | 1.452282158 |
| ANKRD361          | 3.24E-94  | 0.4969311 | 0.204 | 0.074 | 7.82E-90  | 1.3 | ANKRD36   | 2.756756757 |
| RP11-608O21.12    | 5.33E-94  | 0.476337  | 0.736 | 0.513 | 1.28E-89  | 1.3 | RP11-608O | 1.434697856 |
| PODXL             | 5.90E-94  | 0.4006486 | 0.224 | 0.085 | 1.42E-89  | 1.3 | PODXL     | 2.635294118 |
| CCL201            | 1.06E-93  | 0.9582265 | 0.339 | 0.164 | 2.55E-89  | 1.3 | CCL20     | 2.067073171 |
| EYA21             | 2.45E-93  | 0.4271031 | 0.233 | 0.091 | 5.90E-89  | 1.3 | EYA2      | 2.56043956  |
| RPS15A2           | 7.29E-93  | 0.3577607 | 0.958 | 0.94  | 1.76E-88  | 1.3 | RPS15A    | 1.019148936 |
| IGF2BP22          | 1.09E-92  | 0.3095329 | 0.473 | 0.247 | 2.64E-88  | 1.3 | IGF2BP2   | 1.914979757 |
| CHODL             | 1.96E-92  | 0.4791147 | 0.254 | 0.104 | 4.73E-88  | 1.3 | CHODL     | 2.442307692 |
| WFDC31            | 4.65E-92  | 0.3156056 | 0.165 | 0.053 | 1.12E-87  | 1.3 | WFDC3     | 3.113207547 |
| BAIAP2L12         | 5.13E-92  | 0.509772  | 0.958 | 0.922 | 1.24E-87  | 1.3 | BAIAP2L1  | 1.039045553 |
| TANK2             | 6.46E-92  | 0.4604885 | 0.684 | 0.448 | 1.56E-87  | 1.3 | TANK      | 1.526785714 |
| OOEP2             | 9.41E-92  | 0.3474153 | 0.972 | 0.965 | 2.27E-87  | 1.3 | OOEP      | 1.007253886 |
| PRDM11            | 1.02E-91  | 0.2855337 | 0.104 | 0.024 | 2.47E-87  | 1.3 | PRDM1     | 4.333333333 |
| HSP90AB12         | 2.59E-91  | 0.3902747 | 0.928 | 0.828 | 6.24E-87  | 1.3 | HSP90AB1  | 1.120772947 |
| ARL4C2            | 3.40E-91  | 0.4203096 | 0.231 | 0.091 | 8.20E-87  | 1.3 | ARL4C     | 2.538461538 |
| RPS32             | 1.23E-90  | 0.658106  | 0.928 | 0.861 | 2.96E-86  | 1.3 | RPS3      | 1.077816492 |
| RNASE1            | 2.27E-90  | 0.3005801 | 0.078 | 0.014 | 5.47E-86  | 1.3 | RNASE1    | 5.571428571 |
| ANXA31            | 3.74E-90  | 0.5723835 | 0.541 | 0.339 | 9.01E-86  | 1.3 | ANXA3     | 1.595870206 |
| RPS122            | 3.77E-90  | 0.7177599 | 0.758 | 0.636 | 9.10E-86  | 1.3 | RPS12     | 1.191823899 |
| FAM134B1          | 5.77E-90  | 0.4651772 | 0.212 | 0.081 | 1.39E-85  | 1.3 | FAM134B   | 2.617283951 |
| AC005863.1        | 1.68E-89  | 0.1275954 | 0.047 | 0.005 | 4.05E-85  | 1.3 | AC005863. | 9.4         |
| CYYR11            | 2.32E-89  | 0.2794693 | 0.113 | 0.028 | 5.60E-85  | 1.3 | CYYR1     | 4.035714286 |
| TBC1D3P1-DHX40P12 | 6.07E-89  | 0.4801966 | 0.745 | 0.569 | 1.46E-84  | 1.3 | TBC1D3P1- | 1.309314587 |
| PTPN142           | 6.93E-89  | 0.4672335 | 0.494 | 0.278 | 1.67E-84  | 1.3 | PTPN14    | 1.776978417 |

|               |          |           |       |       |          |     |           |             |
|---------------|----------|-----------|-------|-------|----------|-----|-----------|-------------|
| HPS52         | 1.65E-88 | 0.4075095 | 0.277 | 0.121 | 3.97E-84 | 1.3 | HPS5      | 2.289256198 |
| NEURL31       | 3.82E-88 | 0.2939441 | 0.099 | 0.022 | 9.22E-84 | 1.3 | NEURL3    | 4.5         |
| ST3GAL61      | 8.25E-88 | 0.3855604 | 0.16  | 0.052 | 1.99E-83 | 1.3 | ST3GAL6   | 3.076923077 |
| FMN1          | 1.82E-87 | 0.4131073 | 0.228 | 0.092 | 4.39E-83 | 1.3 | FMN1      | 2.47826087  |
| RPL22L12      | 3.97E-87 | 0.547746  | 0.605 | 0.399 | 9.58E-83 | 1.3 | RPL22L1   | 1.516290727 |
| IFNAR21       | 5.88E-87 | 0.4941051 | 0.354 | 0.177 | 1.42E-82 | 1.3 | IFNAR2    | 2           |
| PSMC11        | 6.20E-87 | 0.5407429 | 0.45  | 0.258 | 1.49E-82 | 1.3 | PSMC1     | 1.744186047 |
| CDK62         | 7.74E-87 | 0.4806683 | 0.263 | 0.114 | 1.87E-82 | 1.3 | CDK6      | 2.307017544 |
| RPLP02        | 9.34E-87 | 0.5869063 | 0.915 | 0.86  | 2.25E-82 | 1.3 | RPLP0     | 1.063953488 |
| SDCBP1        | 9.71E-87 | 0.5807704 | 0.779 | 0.598 | 2.34E-82 | 1.3 | SDCBP     | 1.302675585 |
| CAMK2D2       | 1.32E-86 | 0.4311142 | 0.327 | 0.156 | 3.18E-82 | 1.3 | CAMK2D    | 2.096153846 |
| TRABD2B       | 1.74E-86 | 0.4667744 | 0.144 | 0.044 | 4.19E-82 | 1.3 | TRABD2B   | 3.272727273 |
| UGP21         | 2.30E-86 | 0.4872419 | 0.627 | 0.412 | 5.55E-82 | 1.3 | UGP2      | 1.52184466  |
| RPL342        | 5.86E-86 | 0.3241631 | 0.977 | 0.979 | 1.41E-81 | 1.3 | RPL34     | 0.997957099 |
| RPL412        | 2.18E-85 | 0.4750773 | 0.952 | 0.896 | 5.25E-81 | 1.3 | RPL41     | 1.0625      |
| RPS242        | 2.25E-85 | 0.281445  | 0.975 | 0.965 | 5.42E-81 | 1.3 | RPS24     | 1.010362694 |
| NUDT5         | 3.10E-85 | 0.3916436 | 0.273 | 0.121 | 7.48E-81 | 1.3 | NUDT5     | 2.256198347 |
| CEPT11        | 5.38E-85 | 0.4501741 | 0.329 | 0.161 | 1.30E-80 | 1.3 | CEPT1     | 2.043478261 |
| GABRE1        | 8.63E-85 | 0.2377451 | 0.097 | 0.022 | 2.08E-80 | 1.3 | GABRE     | 4.409090909 |
| ST6GAL11      | 1.05E-84 | 0.4967493 | 0.422 | 0.23  | 2.53E-80 | 1.3 | ST6GAL1   | 1.834782609 |
| EEF1A12       | 3.09E-84 | 0.3124305 | 0.978 | 0.974 | 7.46E-80 | 1.3 | EEF1A1    | 1.004106776 |
| PDE8A2        | 4.36E-84 | 0.51392   | 0.509 | 0.306 | 1.05E-79 | 1.3 | PDE8A     | 1.663398693 |
| CTSV2         | 1.00E-83 | 0.378011  | 0.241 | 0.099 | 2.41E-79 | 1.3 | CTSV      | 2.434343434 |
| CLDN13        | 1.24E-83 | 0.4070355 | 0.397 | 0.207 | 2.99E-79 | 1.3 | CLDN1     | 1.917874396 |
| ZPLD11        | 1.53E-83 | 0.4299038 | 0.164 | 0.056 | 3.68E-79 | 1.3 | ZPLD1     | 2.928571429 |
| BACE22        | 4.91E-83 | 0.5140475 | 0.494 | 0.29  | 1.19E-78 | 1.3 | BACE2     | 1.703448276 |
| NUB11         | 6.56E-83 | 0.7642073 | 0.336 | 0.175 | 1.58E-78 | 1.3 | NUB1      | 1.92        |
| SEC61G2       | 9.32E-83 | 0.5522213 | 0.748 | 0.581 | 2.25E-78 | 1.3 | SEC61G    | 1.287435456 |
| DENND2D       | 9.48E-83 | 0.3427789 | 0.19  | 0.071 | 2.29E-78 | 1.3 | DENND2D   | 2.676056338 |
| RP11-114H23.1 | 1.94E-82 | 0.4757434 | 0.224 | 0.091 | 4.68E-78 | 1.3 | RP11-114H | 2.461538462 |
| PSMA32        | 2.56E-82 | 0.5368631 | 0.517 | 0.317 | 6.16E-78 | 1.3 | PSMA3     | 1.630914826 |
| MT-ND42       | 3.69E-82 | 0.3326746 | 0.987 | 0.994 | 8.89E-78 | 1.3 | MT-ND4    | 0.992957746 |
| EIF3L2        | 5.22E-82 | 0.4134727 | 0.763 | 0.567 | 1.26E-77 | 1.3 | EIF3L     | 1.345679012 |
| SPDYE21       | 6.66E-82 | 0.3799343 | 0.263 | 0.117 | 1.61E-77 | 1.3 | SPDYE2    | 2.247863248 |
| FAM20C        | 8.08E-82 | 0.4316923 | 0.142 | 0.045 | 1.95E-77 | 1.3 | FAM20C    | 3.155555556 |
| NT5C21        | 9.02E-82 | 0.4488501 | 0.443 | 0.248 | 2.17E-77 | 1.3 | NT5C2     | 1.786290323 |
| RP11-244M2.12 | 2.35E-81 | 0.4940566 | 0.59  | 0.388 | 5.68E-77 | 1.3 | RP11-244M | 1.520618557 |
| UBA522        | 5.42E-81 | 0.3290015 | 0.954 | 0.914 | 1.31E-76 | 1.3 | UBA52     | 1.043763676 |
| CMPK11        | 1.45E-80 | 0.4718118 | 0.362 | 0.189 | 3.51E-76 | 1.3 | CMPK1     | 1.915343915 |
| ZRANB21       | 1.59E-80 | 0.4317896 | 0.394 | 0.212 | 3.84E-76 | 1.3 | ZRANB2    | 1.858490566 |
| ZCCHC171      | 1.74E-80 | 0.4803708 | 0.424 | 0.239 | 4.19E-76 | 1.3 | ZCCHC17   | 1.774058577 |
| IL342         | 1.78E-80 | 0.3896031 | 0.185 | 0.069 | 4.29E-76 | 1.3 | IL34      | 2.68115942  |
| ATRNL1        | 2.29E-80 | 0.4153575 | 0.132 | 0.04  | 5.51E-76 | 1.3 | ATRNL1    | 3.3         |
| GPR871        | 2.52E-80 | 0.2504932 | 0.091 | 0.021 | 6.07E-76 | 1.3 | GPR87     | 4.333333333 |
| TLR21         | 5.44E-80 | 0.4109611 | 0.314 | 0.152 | 1.31E-75 | 1.3 | TLR2      | 2.065789474 |
| TLN21         | 9.84E-80 | 0.4133269 | 0.157 | 0.054 | 2.37E-75 | 1.3 | TLN2      | 2.907407407 |
| SLC18B12      | 1.24E-79 | 0.3972109 | 0.221 | 0.091 | 2.98E-75 | 1.3 | SLC18B1   | 2.428571429 |
| ACP12         | 1.54E-79 | 0.4431808 | 0.485 | 0.288 | 3.71E-75 | 1.3 | ACP1      | 1.684027778 |
| MUC15         | 3.35E-79 | 0.2227634 | 0.077 | 0.015 | 8.08E-75 | 1.3 | MUC15     | 5.133333333 |
| TGFBR32       | 4.99E-79 | 0.5665627 | 0.211 | 0.086 | 1.20E-74 | 1.3 | TGFBR3    | 2.453488372 |
| CYB5R21       | 5.69E-79 | 0.2285204 | 0.103 | 0.026 | 1.37E-74 | 1.3 | CYB5R2    | 3.961538462 |
| RP11-142C4.6  | 1.09E-78 | 0.3492097 | 0.157 | 0.054 | 2.63E-74 | 1.3 | RP11-142C | 2.907407407 |

|              |          |           |       |       |          |     |           |             |
|--------------|----------|-----------|-------|-------|----------|-----|-----------|-------------|
| SPATA51      | 1.16E-78 | 0.3772047 | 0.191 | 0.073 | 2.80E-74 | 1.3 | SPATA5    | 2.616438356 |
| OSMR1        | 1.39E-78 | 0.473109  | 0.482 | 0.285 | 3.36E-74 | 1.3 | OSMR      | 1.69122807  |
| EGF          | 3.41E-78 | 0.2641643 | 0.113 | 0.031 | 8.23E-74 | 1.3 | EGF       | 3.64516129  |
| BTBD11       | 4.19E-78 | 0.3476523 | 0.116 | 0.033 | 1.01E-73 | 1.3 | BTBD11    | 3.515151515 |
| SFT2D22      | 1.25E-77 | 0.367189  | 0.26  | 0.117 | 3.01E-73 | 1.3 | SFT2D2    | 2.222222222 |
| PLA2R1       | 2.57E-77 | 0.4583044 | 0.337 | 0.171 | 6.19E-73 | 1.3 | PLA2R1    | 1.970760234 |
| IFITM3       | 3.20E-77 | 0.4936551 | 0.328 | 0.167 | 7.73E-73 | 1.3 | IFITM3    | 1.964071856 |
| FDFT1        | 6.10E-77 | 0.5072293 | 0.482 | 0.294 | 1.47E-72 | 1.3 | FDFT1     | 1.639455782 |
| BRK12        | 1.01E-76 | 0.4410007 | 0.761 | 0.588 | 2.43E-72 | 1.3 | BRK1      | 1.294217687 |
| CNIH41       | 1.68E-76 | 0.4299223 | 0.472 | 0.281 | 4.05E-72 | 1.3 | CNIH4     | 1.679715302 |
| CDK141       | 2.06E-76 | 0.5017504 | 0.498 | 0.306 | 4.97E-72 | 1.3 | CDK14     | 1.62745098  |
| PNISR1       | 2.13E-76 | 0.4138289 | 0.837 | 0.66  | 5.14E-72 | 1.3 | PNISR     | 1.268181818 |
| NACA22       | 2.58E-76 | 0.4496067 | 0.644 | 0.446 | 6.21E-72 | 1.3 | NACA2     | 1.443946188 |
| THADA        | 4.73E-76 | 0.6790847 | 0.345 | 0.184 | 1.14E-71 | 1.3 | THADA     | 1.875       |
| ITPR2        | 6.58E-76 | 0.5354378 | 0.642 | 0.454 | 1.59E-71 | 1.3 | ITPR2     | 1.414096916 |
| CCT52        | 7.48E-76 | 0.4941368 | 0.462 | 0.276 | 1.80E-71 | 1.3 | CCT5      | 1.673913043 |
| HSD11B11     | 9.78E-76 | 0.4325731 | 0.205 | 0.083 | 2.36E-71 | 1.3 | HSD11B1   | 2.469879518 |
| TNFRSF11B1   | 1.50E-75 | 0.4652477 | 0.165 | 0.06  | 3.62E-71 | 1.3 | TNFRSF11E | 2.75        |
| PSMB11       | 1.76E-75 | 0.4873928 | 0.565 | 0.37  | 4.24E-71 | 1.3 | PSMB1     | 1.527027027 |
| CHI3L1       | 1.98E-75 | 0.5700956 | 0.213 | 0.089 | 4.77E-71 | 1.3 | CHI3L1    | 2.393258427 |
| SSBP11       | 5.41E-75 | 0.5052297 | 0.532 | 0.34  | 1.31E-70 | 1.3 | SSBP1     | 1.564705882 |
| PPM1H        | 2.64E-74 | 0.516251  | 0.481 | 0.293 | 6.38E-70 | 1.3 | PPM1H     | 1.641638225 |
| COA1         | 4.35E-74 | 0.4057612 | 0.373 | 0.199 | 1.05E-69 | 1.3 | COA1      | 1.874371859 |
| MGST31       | 5.33E-73 | 0.454422  | 0.598 | 0.404 | 1.28E-68 | 1.3 | MGST3     | 1.48019802  |
| RPL312       | 2.10E-71 | 0.3017046 | 0.959 | 0.92  | 5.07E-67 | 1.3 | RPL31     | 1.042391304 |
| ANKRD36B1    | 3.06E-71 | 0.4063944 | 0.169 | 0.064 | 7.38E-67 | 1.3 | ANKRD36B  | 2.640625    |
| C10orf90     | 4.99E-71 | 0.3022835 | 0.137 | 0.046 | 1.20E-66 | 1.3 | C10orf90  | 2.97826087  |
| ETS12        | 1.36E-70 | 0.3653843 | 0.156 | 0.056 | 3.27E-66 | 1.3 | ETS1      | 2.785714286 |
| IGFBP51      | 3.19E-70 | 0.3820541 | 0.107 | 0.031 | 7.70E-66 | 1.3 | IGFBP5    | 3.451612903 |
| PRELID1      | 3.78E-70 | 0.3272737 | 0.184 | 0.074 | 9.13E-66 | 1.3 | PRELID1   | 2.486486486 |
| MT-ATP6      | 4.14E-70 | 0.3523046 | 0.988 | 0.991 | 9.98E-66 | 1.3 | MT-ATP6   | 0.996972755 |
| SLC11A21     | 1.18E-69 | 0.4390471 | 0.518 | 0.327 | 2.85E-65 | 1.3 | SLC11A2   | 1.584097859 |
| LCN2         | 1.40E-69 | 0.3694489 | 0.062 | 0.012 | 3.38E-65 | 1.3 | LCN2      | 5.166666667 |
| KLK101       | 1.55E-69 | 0.2436588 | 0.086 | 0.021 | 3.73E-65 | 1.3 | KLK10     | 4.095238095 |
| RGS101       | 2.13E-69 | 0.3085383 | 0.15  | 0.054 | 5.14E-65 | 1.3 | RGS10     | 2.777777778 |
| JPX          | 3.25E-69 | 0.3759009 | 0.331 | 0.173 | 7.84E-65 | 1.3 | JPX       | 1.913294798 |
| ATP6V1B21    | 3.29E-69 | 0.3188064 | 0.186 | 0.074 | 7.94E-65 | 1.3 | ATP6V1B2  | 2.513513514 |
| CLEC7A       | 4.33E-69 | 0.304898  | 0.162 | 0.06  | 1.04E-64 | 1.3 | CLEC7A    | 2.7         |
| RPL192       | 6.46E-69 | 0.480548  | 0.947 | 0.896 | 1.56E-64 | 1.3 | RPL19     | 1.056919643 |
| MCF2L22      | 6.53E-69 | 0.3861251 | 0.205 | 0.087 | 1.57E-64 | 1.3 | MCF2L2    | 2.356321839 |
| TFCP2L12     | 6.54E-69 | 0.5071843 | 0.191 | 0.079 | 1.58E-64 | 1.3 | TFCP2L1   | 2.417721519 |
| LINC00511    | 1.04E-68 | 0.3985646 | 0.177 | 0.07  | 2.52E-64 | 1.3 | LINC00511 | 2.528571429 |
| THUMPD3-AS11 | 2.54E-68 | 0.3778204 | 0.373 | 0.207 | 6.12E-64 | 1.3 | THUMPD3-  | 1.801932367 |
| LTBP11       | 2.68E-68 | 0.5454237 | 0.336 | 0.185 | 6.45E-64 | 1.3 | LTBP1     | 1.816216216 |
| CCT3         | 8.79E-68 | 0.4095808 | 0.529 | 0.34  | 2.12E-63 | 1.3 | CCT3      | 1.555882353 |
| DMKN         | 1.28E-67 | 0.3111884 | 0.175 | 0.069 | 3.09E-63 | 1.3 | DMKN      | 2.536231884 |
| FGFBP11      | 1.78E-67 | 0.4488859 | 0.1   | 0.028 | 4.29E-63 | 1.3 | FGFBP1    | 3.571428571 |
| GLIPR21      | 4.47E-67 | 0.2638557 | 0.145 | 0.052 | 1.08E-62 | 1.3 | GLIPR2    | 2.788461538 |
| PDE1C1       | 4.78E-67 | 0.3086834 | 0.111 | 0.034 | 1.15E-62 | 1.3 | PDE1C     | 3.264705882 |
| PTCHD12      | 4.85E-67 | 0.2460048 | 0.11  | 0.033 | 1.17E-62 | 1.3 | PTCHD1    | 3.333333333 |
| S100A12      | 1.36E-66 | 0.2372253 | 0.107 | 0.032 | 3.28E-62 | 1.3 | S100A1    | 3.34375     |
| DAPP12       | 5.15E-66 | 0.3014926 | 0.399 | 0.223 | 1.24E-61 | 1.3 | DAPP1     | 1.789237668 |

|              |          |           |       |       |          |     |           |             |
|--------------|----------|-----------|-------|-------|----------|-----|-----------|-------------|
| ZNF385D      | 8.41E-66 | 0.3236621 | 0.116 | 0.037 | 2.03E-61 | 1.3 | ZNF385D   | 3.135135135 |
| CTDSPL       | 1.07E-65 | 0.2408015 | 0.107 | 0.032 | 2.57E-61 | 1.3 | CTDSPL    | 3.34375     |
| ARG2         | 4.26E-65 | 0.2679999 | 0.232 | 0.106 | 1.03E-60 | 1.3 | ARG2      | 2.188679245 |
| SLC39A8      | 6.86E-65 | 0.360418  | 0.193 | 0.082 | 1.65E-60 | 1.3 | SLC39A8   | 2.353658537 |
| GNE          | 7.65E-65 | 0.3821334 | 0.244 | 0.116 | 1.85E-60 | 1.3 | GNE       | 2.103448276 |
| LRRC491      | 1.13E-64 | 0.3509398 | 0.171 | 0.069 | 2.71E-60 | 1.3 | LRRC49    | 2.47826087  |
| PLEKHG12     | 4.30E-64 | 0.3304164 | 0.207 | 0.091 | 1.04E-59 | 1.3 | PLEKHG1   | 2.274725275 |
| CCDC822      | 8.00E-64 | 0.3606706 | 0.28  | 0.141 | 1.93E-59 | 1.3 | CCDC82    | 1.985815603 |
| MMADHC1      | 1.74E-63 | 0.3810654 | 0.466 | 0.289 | 4.19E-59 | 1.3 | MMADHC    | 1.612456747 |
| CNTNAP3      | 1.76E-63 | 0.2391427 | 0.09  | 0.025 | 4.25E-59 | 1.3 | CNTNAP3   | 3.6         |
| FADS1        | 2.48E-63 | 0.1812107 | 0.064 | 0.013 | 5.98E-59 | 1.3 | FADS1     | 4.923076923 |
| CFLAR1       | 2.59E-63 | 0.4143853 | 0.505 | 0.321 | 6.24E-59 | 1.3 | CFLAR     | 1.573208723 |
| RP11-449D8.5 | 3.77E-63 | 0.3002208 | 0.111 | 0.035 | 9.10E-59 | 1.3 | RP11-449D | 3.171428571 |
| BARX22       | 4.57E-63 | 0.4300807 | 0.4   | 0.232 | 1.10E-58 | 1.3 | BARX2     | 1.724137931 |
| GHITM        | 5.04E-63 | 0.4641685 | 0.595 | 0.426 | 1.21E-58 | 1.3 | GHITM     | 1.396713615 |
| PM20D21      | 5.51E-63 | 0.2841182 | 0.185 | 0.078 | 1.33E-58 | 1.3 | PM20D2    | 2.371794872 |
| CHST91       | 6.32E-63 | 0.2170681 | 0.072 | 0.017 | 1.52E-58 | 1.3 | CHST9     | 4.235294118 |
| SRSF32       | 1.05E-62 | 0.3928317 | 0.605 | 0.411 | 2.52E-58 | 1.3 | SRSF3     | 1.472019465 |
| ENOSF1       | 1.44E-62 | 0.3828121 | 0.297 | 0.156 | 3.46E-58 | 1.3 | ENOSF1    | 1.903846154 |
| NCALD1       | 1.59E-62 | 0.3886528 | 0.241 | 0.115 | 3.83E-58 | 1.3 | NCALD     | 2.095652174 |
| ACSL42       | 2.69E-62 | 0.2679837 | 0.128 | 0.044 | 6.48E-58 | 1.3 | ACSL4     | 2.909090909 |
| PAM1         | 3.10E-62 | 0.387128  | 0.642 | 0.446 | 7.47E-58 | 1.3 | PAM       | 1.439461883 |
| MCTP21       | 3.93E-62 | 0.3378363 | 0.19  | 0.081 | 9.47E-58 | 1.3 | MCTP2     | 2.345679012 |
| CCT22        | 5.54E-62 | 0.3862301 | 0.461 | 0.284 | 1.34E-57 | 1.3 | CCT2      | 1.623239437 |
| CTSC         | 6.20E-62 | 0.2136769 | 0.096 | 0.028 | 1.50E-57 | 1.3 | CTSC      | 3.428571429 |
| TEX142       | 7.15E-62 | 0.4413797 | 0.268 | 0.136 | 1.72E-57 | 1.3 | TEX14     | 1.970588235 |
| RNF242       | 8.52E-62 | 0.4071516 | 0.496 | 0.312 | 2.06E-57 | 1.3 | RNF24     | 1.58974359  |
| NCMAP2       | 9.28E-62 | 0.2755573 | 0.112 | 0.036 | 2.24E-57 | 1.3 | NCMAP     | 3.111111111 |
| COX7A2L2     | 9.62E-62 | 0.366757  | 0.669 | 0.478 | 2.32E-57 | 1.3 | COX7A2L   | 1.39958159  |
| USP13        | 9.99E-62 | 0.2412353 | 0.118 | 0.039 | 2.41E-57 | 1.3 | USP13     | 3.025641026 |
| SNRPB22      | 1.16E-61 | 0.3759129 | 0.51  | 0.324 | 2.80E-57 | 1.3 | SNRPB2    | 1.574074074 |
| C15orf52     | 1.22E-61 | 0.1918975 | 0.079 | 0.02  | 2.94E-57 | 1.3 | C15orf52  | 3.95        |
| CCND3        | 1.61E-61 | 0.4817453 | 0.43  | 0.265 | 3.89E-57 | 1.3 | CCND3     | 1.622641509 |
| RPS4X2       | 2.39E-61 | 0.2494489 | 0.977 | 0.979 | 5.76E-57 | 1.3 | RPS4X     | 0.997957099 |
| PADI2        | 3.01E-61 | 0.3557327 | 0.181 | 0.076 | 7.26E-57 | 1.3 | PADI2     | 2.381578947 |
| SYNJ21       | 3.38E-61 | 0.4176725 | 0.366 | 0.21  | 8.14E-57 | 1.3 | SYNJ2     | 1.742857143 |
| TTLL41       | 3.68E-61 | 0.3441539 | 0.22  | 0.102 | 8.87E-57 | 1.3 | TTLL4     | 2.156862745 |
| TCEAL82      | 6.04E-61 | 0.3306404 | 0.38  | 0.216 | 1.46E-56 | 1.3 | TCEAL8    | 1.759259259 |
| SYNM         | 1.85E-60 | 0.385783  | 0.174 | 0.073 | 4.46E-56 | 1.3 | SYNM      | 2.383561644 |
| ADARB1       | 2.25E-60 | 0.2305711 | 0.095 | 0.028 | 5.43E-56 | 1.3 | ADARB1    | 3.392857143 |
| WTAP2        | 3.06E-60 | 0.3598575 | 0.676 | 0.494 | 7.37E-56 | 1.3 | WTAP      | 1.368421053 |
| HAX11        | 3.23E-60 | 0.3794618 | 0.401 | 0.237 | 7.80E-56 | 1.3 | HAX1      | 1.691983122 |
| SLC16A1-AS11 | 3.26E-60 | 0.3249786 | 0.149 | 0.058 | 7.86E-56 | 1.3 | SLC16A1-A | 2.568965517 |
| GPRIN3       | 5.31E-60 | 0.1751731 | 0.058 | 0.011 | 1.28E-55 | 1.3 | GPRIN3    | 5.272727273 |
| OAT1         | 9.85E-60 | 0.3954922 | 0.425 | 0.259 | 2.37E-55 | 1.3 | OAT       | 1.640926641 |
| TTC11        | 9.87E-60 | 0.3876492 | 0.42  | 0.255 | 2.38E-55 | 1.3 | TTC1      | 1.647058824 |
| FANCL        | 1.06E-59 | 0.2528853 | 0.117 | 0.04  | 2.56E-55 | 1.3 | FANCL     | 2.925       |
| MT-CO12      | 1.19E-59 | 0.4410232 | 0.986 | 0.992 | 2.87E-55 | 1.3 | MT-CO1    | 0.993951613 |
| CKS1B1       | 1.57E-59 | 0.4033598 | 0.467 | 0.296 | 3.77E-55 | 1.3 | CKS1B     | 1.577702703 |
| DPYD         | 2.32E-59 | 0.4513326 | 0.704 | 0.497 | 5.59E-55 | 1.3 | DPYD      | 1.416498994 |
| DAPK12       | 3.11E-59 | 0.451233  | 0.673 | 0.516 | 7.49E-55 | 1.3 | DAPK1     | 1.304263566 |
| BCAS32       | 3.50E-59 | 0.3327137 | 0.849 | 0.725 | 8.45E-55 | 1.3 | BCAS3     | 1.171034483 |



|               |          |           |       |       |          |     |            |             |
|---------------|----------|-----------|-------|-------|----------|-----|------------|-------------|
| PSMA4         | 3.96E-59 | 0.5389847 | 0.589 | 0.422 | 9.56E-55 | 1.3 | PSMA4      | 1.395734597 |
| FTH11         | 4.16E-59 | 0.5152658 | 0.915 | 0.835 | 1.00E-54 | 1.3 | FTH1       | 1.095808383 |
| MRAS          | 5.08E-59 | 0.2097817 | 0.098 | 0.03  | 1.23E-54 | 1.3 | MRAS       | 3.266666667 |
| TM4SF18       | 6.16E-59 | 0.4225593 | 0.183 | 0.081 | 1.49E-54 | 1.3 | TM4SF18    | 2.259259259 |
| CARD6         | 1.23E-58 | 0.2207518 | 0.088 | 0.025 | 2.97E-54 | 1.3 | CARD6      | 3.52        |
| SNRPD12       | 1.39E-58 | 0.3577924 | 0.437 | 0.267 | 3.35E-54 | 1.3 | SNRPD1     | 1.63670412  |
| TBC1D5        | 1.52E-58 | 0.4445799 | 0.511 | 0.335 | 3.66E-54 | 1.3 | TBC1D5     | 1.525373134 |
| EPB41L1       | 2.63E-58 | 0.3121926 | 0.152 | 0.06  | 6.34E-54 | 1.3 | EPB41L1    | 2.533333333 |
| EIF3K2        | 3.61E-58 | 0.3593695 | 0.489 | 0.312 | 8.71E-54 | 1.3 | EIF3K      | 1.567307692 |
| GS1-24F4.2    | 4.65E-58 | 0.3109627 | 0.147 | 0.057 | 1.12E-53 | 1.3 | GS1-24F4.2 | 2.578947368 |
| METAP21       | 6.00E-58 | 0.3514917 | 0.387 | 0.227 | 1.45E-53 | 1.3 | METAP2     | 1.704845815 |
| DDX182        | 6.49E-58 | 0.3891171 | 0.436 | 0.271 | 1.56E-53 | 1.3 | DDX18      | 1.608856089 |
| GSDMC         | 1.38E-57 | 0.1623333 | 0.064 | 0.014 | 3.32E-53 | 1.3 | GSDMC      | 4.571428571 |
| ALPK1         | 1.98E-57 | 0.3765214 | 0.355 | 0.202 | 4.77E-53 | 1.3 | ALPK1      | 1.757425743 |
| CTSB          | 3.39E-57 | 0.5742065 | 0.423 | 0.275 | 8.18E-53 | 1.3 | CTSB       | 1.538181818 |
| NRG11         | 4.38E-57 | 0.4346599 | 0.166 | 0.07  | 1.06E-52 | 1.3 | NRG1       | 2.371428571 |
| DARS          | 5.96E-57 | 0.340544  | 0.391 | 0.23  | 1.44E-52 | 1.3 | DARS       | 1.7         |
| KANK11        | 9.82E-57 | 0.364188  | 0.279 | 0.145 | 2.37E-52 | 1.3 | KANK1      | 1.924137931 |
| TXNDC91       | 1.04E-56 | 0.3238616 | 0.215 | 0.101 | 2.50E-52 | 1.3 | TXNDC9     | 2.128712871 |
| RP11-66B24.41 | 1.18E-56 | 0.3069462 | 0.102 | 0.033 | 2.84E-52 | 1.3 | RP11-66B2  | 3.090909091 |
| EIF2S32       | 1.30E-56 | 0.3527226 | 0.44  | 0.275 | 3.13E-52 | 1.3 | EIF2S3     | 1.6         |
| ZNF6522       | 1.31E-56 | 0.4073383 | 0.599 | 0.427 | 3.16E-52 | 1.3 | ZNF652     | 1.402810304 |
| MPZL21        | 1.66E-56 | 0.270446  | 0.173 | 0.074 | 4.01E-52 | 1.3 | MPZL2      | 2.337837838 |
| DYNLT1        | 3.28E-56 | 0.3558431 | 0.74  | 0.577 | 7.92E-52 | 1.3 | DYNLT1     | 1.282495667 |
| PNRC11        | 3.67E-56 | 0.391496  | 0.579 | 0.398 | 8.86E-52 | 1.3 | PNRC1      | 1.454773869 |
| FGGY1         | 5.44E-56 | 0.3337299 | 0.249 | 0.126 | 1.31E-51 | 1.3 | FGGY       | 1.976190476 |
| PSMC21        | 1.75E-55 | 0.3538494 | 0.352 | 0.203 | 4.21E-51 | 1.3 | PSMC2      | 1.733990148 |
| GLYATL2       | 2.29E-55 | 0.2115314 | 0.113 | 0.039 | 5.52E-51 | 1.3 | GLYATL2    | 2.897435897 |
| MET2          | 2.74E-55 | 0.337197  | 0.365 | 0.21  | 6.60E-51 | 1.3 | MET        | 1.738095238 |
| PRKX1         | 3.44E-55 | 0.3141385 | 0.197 | 0.09  | 8.30E-51 | 1.3 | PRKX       | 2.188888889 |
| NPAS3         | 4.47E-55 | 0.3522037 | 0.198 | 0.091 | 1.08E-50 | 1.3 | NPAS3      | 2.175824176 |
| ATP5L2        | 1.03E-54 | 0.312591  | 0.879 | 0.801 | 2.49E-50 | 1.3 | ATP5L      | 1.097378277 |
| SDC41         | 1.13E-54 | 0.4598464 | 0.476 | 0.311 | 2.72E-50 | 1.3 | SDC4       | 1.530546624 |
| TKT           | 1.17E-54 | 0.3196769 | 0.197 | 0.091 | 2.81E-50 | 1.3 | TKT        | 2.164835165 |
| COBLL1        | 2.46E-54 | 0.3259798 | 0.167 | 0.072 | 5.93E-50 | 1.3 | COBLL1     | 2.319444444 |
| LINC01183     | 2.47E-54 | 0.2283817 | 0.087 | 0.026 | 5.96E-50 | 1.3 | LINC01183  | 3.346153846 |
| NR2F2-AS1     | 3.64E-54 | 0.2705318 | 0.153 | 0.063 | 8.79E-50 | 1.3 | NR2F2-AS1  | 2.428571429 |
| GABPB1-AS11   | 4.01E-54 | 0.3018574 | 0.249 | 0.127 | 9.67E-50 | 1.3 | GABPB1-AS1 | 1.960629921 |
| ZNF5621       | 4.61E-54 | 0.3255314 | 0.272 | 0.143 | 1.11E-49 | 1.3 | ZNF562     | 1.902097902 |
| GSAP1         | 6.42E-54 | 0.2852354 | 0.18  | 0.081 | 1.55E-49 | 1.3 | GSAP       | 2.222222222 |
| COL6A22       | 7.62E-54 | 0.2490665 | 0.145 | 0.058 | 1.84E-49 | 1.3 | COL6A2     | 2.5         |
| ZCCHC22       | 8.41E-54 | 0.4457201 | 0.358 | 0.214 | 2.03E-49 | 1.3 | ZCCHC2     | 1.672897196 |
| IGFBP32       | 1.48E-53 | 0.3336521 | 0.13  | 0.049 | 3.56E-49 | 1.3 | IGFBP3     | 2.653061224 |
| KIAA0226L2    | 1.68E-53 | 0.2719123 | 0.118 | 0.043 | 4.04E-49 | 1.3 | KIAA0226L  | 2.744186047 |
| MOB3B1        | 1.86E-53 | 0.2904225 | 0.261 | 0.134 | 4.48E-49 | 1.3 | MOB3B      | 1.947761194 |
| SAMD51        | 1.96E-53 | 0.2282471 | 0.085 | 0.025 | 4.73E-49 | 1.3 | SAMD5      | 3.4         |
| GK5           | 2.63E-53 | 0.2496685 | 0.118 | 0.043 | 6.35E-49 | 1.3 | GK5        | 2.744186047 |
| SOS1          | 3.29E-53 | 0.451474  | 0.511 | 0.354 | 7.93E-49 | 1.3 | SOS1       | 1.443502825 |
| SLCO3A11      | 3.74E-53 | 0.3735677 | 0.307 | 0.171 | 9.02E-49 | 1.3 | SLCO3A1    | 1.795321637 |
| FDCSP         | 6.21E-53 | 1.038629  | 0.231 | 0.119 | 1.50E-48 | 1.3 | FDCSP      | 1.941176471 |
| VIM2          | 6.35E-53 | 0.3243757 | 0.227 | 0.112 | 1.53E-48 | 1.3 | VIM        | 2.026785714 |
| EIF3M2        | 8.91E-53 | 0.3042558 | 0.489 | 0.313 | 2.15E-48 | 1.3 | EIF3M      | 1.562300319 |

|               |          |           |       |       |          |     |            |             |
|---------------|----------|-----------|-------|-------|----------|-----|------------|-------------|
| LINC015491    | 9.05E-53 | 0.306776  | 0.057 | 0.013 | 2.18E-48 | 1.3 | LINC01549  | 4.384615385 |
| NKX1-21       | 1.96E-52 | 0.1001804 | 0.045 | 0.008 | 4.73E-48 | 1.3 | NKX1-2     | 5.625       |
| SLC24A3       | 2.38E-52 | 0.3294607 | 0.215 | 0.103 | 5.73E-48 | 1.3 | SLC24A3    | 2.087378641 |
| BPGM1         | 2.52E-52 | 0.2918944 | 0.177 | 0.079 | 6.07E-48 | 1.3 | BPGM       | 2.240506329 |
| RP11-793A3.21 | 4.07E-52 | 0.2077773 | 0.063 | 0.015 | 9.82E-48 | 1.3 | RP11-793A  | 4.2         |
| FOXN3         | 4.08E-52 | 0.3711955 | 0.297 | 0.166 | 9.85E-48 | 1.3 | FOXN3      | 1.789156627 |
| STAC1         | 4.49E-52 | 0.2010819 | 0.069 | 0.018 | 1.08E-47 | 1.3 | STAC       | 3.833333333 |
| MT-ND21       | 4.89E-52 | 0.28116   | 0.979 | 0.977 | 1.18E-47 | 1.3 | MT-ND2     | 1.002047083 |
| CENPW2        | 9.45E-52 | 0.2537111 | 0.151 | 0.063 | 2.28E-47 | 1.3 | CENPW      | 2.396825397 |
| MID12         | 1.33E-51 | 0.3102823 | 0.138 | 0.056 | 3.21E-47 | 1.3 | MID1       | 2.464285714 |
| C2CD2         | 1.38E-51 | 0.1851458 | 0.077 | 0.022 | 3.32E-47 | 1.3 | C2CD2      | 3.5         |
| CXCL161       | 2.30E-51 | 0.2771134 | 0.248 | 0.128 | 5.55E-47 | 1.3 | CXCL16     | 1.9375      |
| RP5-896L10.12 | 2.49E-51 | 0.2941023 | 0.363 | 0.214 | 6.00E-47 | 1.3 | RP5-896L10 | 1.696261682 |
| ANK3          | 2.78E-51 | 0.4168947 | 0.449 | 0.288 | 6.70E-47 | 1.3 | ANK3       | 1.559027778 |
| POLR1D2       | 3.22E-51 | 0.3494852 | 0.355 | 0.21  | 7.76E-47 | 1.3 | POLR1D     | 1.69047619  |
| SUGT1         | 3.46E-51 | 0.2744181 | 0.205 | 0.098 | 8.33E-47 | 1.3 | SUGT1      | 2.091836735 |
| ZNF518A       | 3.49E-51 | 0.3294553 | 0.234 | 0.119 | 8.41E-47 | 1.3 | ZNF518A    | 1.966386555 |
| LDLRAD3       | 3.54E-51 | 0.3959747 | 0.369 | 0.222 | 8.53E-47 | 1.3 | LDLRAD3    | 1.662162162 |
| BBOX12        | 4.59E-51 | 0.3244711 | 0.226 | 0.112 | 1.11E-46 | 1.3 | BBOX1      | 2.017857143 |
| RPL102        | 6.59E-51 | 0.5827012 | 0.965 | 0.931 | 1.59E-46 | 1.3 | RPL10      | 1.036519871 |
| TOMM72        | 6.74E-51 | 0.2822228 | 0.888 | 0.807 | 1.62E-46 | 1.3 | TOMM7      | 1.100371747 |
| TUBA1C1       | 7.89E-51 | 0.3067728 | 0.436 | 0.274 | 1.90E-46 | 1.3 | TUBA1C     | 1.591240876 |
| P3H22         | 9.73E-51 | 0.270115  | 0.143 | 0.058 | 2.35E-46 | 1.3 | P3H2       | 2.465517241 |
| PDZRN3        | 2.25E-50 | 0.3151196 | 0.191 | 0.09  | 5.41E-46 | 1.3 | PDZRN3     | 2.122222222 |
| CALU1         | 2.32E-50 | 0.3165353 | 0.358 | 0.211 | 5.59E-46 | 1.3 | CALU       | 1.696682464 |
| FSTL11        | 2.62E-50 | 0.2583354 | 0.15  | 0.063 | 6.31E-46 | 1.3 | FSTL1      | 2.380952381 |
| PPP1R9A       | 2.99E-50 | 0.336495  | 0.265 | 0.143 | 7.20E-46 | 1.3 | PPP1R9A    | 1.853146853 |
| LINC01191     | 3.68E-50 | 0.220252  | 0.098 | 0.033 | 8.87E-46 | 1.3 | LINC01191  | 2.96969697  |
| SESN31        | 5.39E-50 | 0.3201872 | 0.114 | 0.042 | 1.30E-45 | 1.3 | SESN3      | 2.714285714 |
| SERPINE2      | 6.51E-50 | 0.2541496 | 0.097 | 0.033 | 1.57E-45 | 1.3 | SERPINE2   | 2.939393939 |
| USP39         | 6.86E-50 | 0.3283871 | 0.487 | 0.32  | 1.65E-45 | 1.3 | USP39      | 1.521875    |
| TUBA1B        | 7.12E-50 | 0.3957118 | 0.4   | 0.25  | 1.72E-45 | 1.3 | TUBA1B     | 1.6         |
| FUT31         | 1.86E-49 | 0.1407073 | 0.049 | 0.01  | 4.50E-45 | 1.3 | FUT3       | 4.9         |
| RPL122        | 3.11E-49 | 0.3993574 | 0.423 | 0.27  | 7.49E-45 | 1.3 | RPL12      | 1.566666667 |
| CLDN8         | 3.33E-49 | 0.2075672 | 0.127 | 0.049 | 8.03E-45 | 1.3 | CLDN8      | 2.591836735 |
| HADH2         | 3.81E-49 | 0.2331595 | 0.197 | 0.094 | 9.20E-45 | 1.3 | HADH       | 2.095744681 |
| RPS192        | 4.24E-49 | 0.8590969 | 0.3   | 0.173 | 1.02E-44 | 1.3 | RPS19      | 1.734104046 |
| CLEC2B2       | 4.77E-49 | 0.3227917 | 0.136 | 0.055 | 1.15E-44 | 1.3 | CLEC2B     | 2.472727273 |
| SUPT3H1       | 5.85E-49 | 0.3086022 | 0.204 | 0.1   | 1.41E-44 | 1.3 | SUPT3H     | 2.04        |
| UBASH3B1      | 6.50E-49 | 0.2816288 | 0.11  | 0.04  | 1.57E-44 | 1.3 | UBASH3B    | 2.75        |
| RP11-903H12.3 | 6.53E-49 | 0.148566  | 0.042 | 0.007 | 1.58E-44 | 1.3 | RP11-903H  | 6           |
| ATP5F11       | 6.89E-49 | 0.3368175 | 0.525 | 0.355 | 1.66E-44 | 1.3 | ATP5F1     | 1.478873239 |
| TMEM126B      | 8.48E-49 | 0.2466972 | 0.2   | 0.096 | 2.04E-44 | 1.3 | TMEM126B   | 2.083333333 |
| VPS13D        | 9.34E-49 | 0.3614634 | 0.414 | 0.261 | 2.25E-44 | 1.3 | VPS13D     | 1.586206897 |
| RBM8A1        | 1.09E-48 | 0.350038  | 0.577 | 0.412 | 2.62E-44 | 1.3 | RBM8A      | 1.400485437 |
| ZNF221        | 1.21E-48 | 0.2979295 | 0.274 | 0.151 | 2.92E-44 | 1.3 | ZNF22      | 1.814569536 |
| ZBTB381       | 1.27E-48 | 0.3536847 | 0.47  | 0.308 | 3.07E-44 | 1.3 | ZBTB38     | 1.525974026 |
| RPL272        | 1.76E-48 | 0.2426038 | 0.942 | 0.905 | 4.24E-44 | 1.3 | RPL27      | 1.040883978 |
| GLIPR12       | 1.83E-48 | 0.1541401 | 0.311 | 0.17  | 4.41E-44 | 1.3 | GLIPR1     | 1.829411765 |
| RAN2          | 1.90E-48 | 0.3324343 | 0.669 | 0.512 | 4.57E-44 | 1.3 | RAN        | 1.306640625 |
| PSMD111       | 6.71E-48 | 0.3722197 | 0.386 | 0.242 | 1.62E-43 | 1.3 | PSMD11     | 1.595041322 |
| UGT2B71       | 8.07E-48 | 0.1890674 | 0.069 | 0.019 | 1.95E-43 | 1.3 | UGT2B7     | 3.631578947 |

|               |          |           |       |       |          |     |           |             |
|---------------|----------|-----------|-------|-------|----------|-----|-----------|-------------|
| MTMR21        | 1.01E-47 | 0.2579122 | 0.146 | 0.062 | 2.45E-43 | 1.3 | MTMR2     | 2.35483871  |
| FTX           | 1.46E-47 | 0.2932142 | 0.738 | 0.535 | 3.53E-43 | 1.3 | FTX       | 1.379439252 |
| PLRG1         | 1.60E-47 | 0.2419037 | 0.161 | 0.072 | 3.87E-43 | 1.3 | PLRG1     | 2.236111111 |
| CDCP11        | 2.11E-47 | 0.3239941 | 0.419 | 0.261 | 5.08E-43 | 1.3 | CDCP1     | 1.605363985 |
| RARS1         | 2.31E-47 | 0.3151015 | 0.347 | 0.207 | 5.57E-43 | 1.3 | RARS      | 1.676328502 |
| MRPS18C1      | 2.55E-47 | 0.2860936 | 0.254 | 0.137 | 6.14E-43 | 1.3 | MRPS18C   | 1.854014599 |
| SNX241        | 2.76E-47 | 0.3333363 | 0.279 | 0.157 | 6.67E-43 | 1.3 | SNX24     | 1.777070064 |
| HSD17B7       | 3.93E-47 | 0.3229009 | 0.17  | 0.079 | 9.49E-43 | 1.3 | HSD17B7   | 2.151898734 |
| PNN2          | 5.43E-47 | 0.3114697 | 0.468 | 0.306 | 1.31E-42 | 1.3 | PNN       | 1.529411765 |
| MTHFD1L2      | 5.48E-47 | 0.3320238 | 0.341 | 0.202 | 1.32E-42 | 1.3 | MTHFD1L   | 1.688118812 |
| B4GALT6       | 6.85E-47 | 0.1514706 | 0.066 | 0.018 | 1.65E-42 | 1.3 | B4GALT6   | 3.666666667 |
| MPP61         | 7.76E-47 | 0.2097192 | 0.11  | 0.041 | 1.87E-42 | 1.3 | MPP6      | 2.682926829 |
| WIPF31        | 8.40E-47 | 0.1811324 | 0.073 | 0.021 | 2.03E-42 | 1.3 | WIPF3     | 3.476190476 |
| NSRP11        | 9.02E-47 | 0.3358258 | 0.33  | 0.196 | 2.17E-42 | 1.3 | NSRP1     | 1.683673469 |
| PARP41        | 1.31E-46 | 0.3288372 | 0.257 | 0.14  | 3.17E-42 | 1.3 | PARP4     | 1.835714286 |
| FRAS11        | 1.52E-46 | 0.1883123 | 0.094 | 0.032 | 3.67E-42 | 1.3 | FRAS1     | 2.9375      |
| INVS          | 1.77E-46 | 0.3134354 | 0.187 | 0.09  | 4.26E-42 | 1.3 | INVS      | 2.077777778 |
| ERH           | 2.65E-46 | 0.3096844 | 0.658 | 0.487 | 6.40E-42 | 1.3 | ERH       | 1.351129363 |
| SIK32         | 3.44E-46 | 0.2569736 | 0.977 | 0.972 | 8.29E-42 | 1.3 | SIK3      | 1.005144033 |
| ODAM          | 3.52E-46 | 0.2144929 | 0.043 | 0.008 | 8.48E-42 | 1.3 | ODAM      | 5.375       |
| CDC26         | 4.65E-46 | 0.2862288 | 0.296 | 0.169 | 1.12E-41 | 1.3 | CDC26     | 1.75147929  |
| RP11-712B9.2  | 4.71E-46 | 0.2267657 | 0.081 | 0.026 | 1.14E-41 | 1.3 | RP11-712B | 3.115384615 |
| EIF2B51       | 4.76E-46 | 0.4484045 | 0.579 | 0.447 | 1.15E-41 | 1.3 | EIF2B5    | 1.295302013 |
| RHOJ          | 5.46E-46 | 0.1481754 | 0.062 | 0.016 | 1.32E-41 | 1.3 | RHOJ      | 3.875       |
| LINC004862    | 5.91E-46 | 0.2062122 | 0.993 | 0.986 | 1.42E-41 | 1.3 | LINC00486 | 1.007099391 |
| AC009313.12   | 6.03E-46 | 0.2779719 | 0.132 | 0.055 | 1.45E-41 | 1.3 | AC009313. | 2.4         |
| MECOM2        | 6.98E-46 | 0.2812811 | 0.883 | 0.794 | 1.68E-41 | 1.3 | MECOM     | 1.11209068  |
| SEL1L31       | 1.13E-45 | 0.2091918 | 0.081 | 0.026 | 2.71E-41 | 1.3 | SEL1L3    | 3.115384615 |
| SRPK11        | 1.18E-45 | 0.3364365 | 0.633 | 0.469 | 2.84E-41 | 1.3 | SRPK1     | 1.349680171 |
| SLC35F31      | 1.30E-45 | 0.2044263 | 0.082 | 0.026 | 3.13E-41 | 1.3 | SLC35F3   | 3.153846154 |
| KARS2         | 1.40E-45 | 0.3206889 | 0.373 | 0.231 | 3.38E-41 | 1.3 | KARS      | 1.614718615 |
| TCF7L12       | 1.56E-45 | 0.2812829 | 0.299 | 0.17  | 3.76E-41 | 1.3 | TCF7L1    | 1.758823529 |
| PLEKHH2       | 1.79E-45 | 0.2632935 | 0.137 | 0.058 | 4.32E-41 | 1.3 | PLEKHH2   | 2.362068966 |
| CCSER1        | 4.52E-45 | 0.2732073 | 0.6   | 0.423 | 1.09E-40 | 1.3 | CCSER1    | 1.418439716 |
| MCTS11        | 5.18E-45 | 0.3035214 | 0.336 | 0.201 | 1.25E-40 | 1.3 | MCTS1     | 1.671641791 |
| SLC5A11       | 5.82E-45 | 0.2148623 | 0.114 | 0.044 | 1.40E-40 | 1.3 | SLC5A1    | 2.590909091 |
| RPS92         | 7.52E-45 | 0.7811098 | 0.349 | 0.215 | 1.81E-40 | 1.3 | RPS9      | 1.623255814 |
| SF3B31        | 1.45E-44 | 0.2898766 | 0.251 | 0.137 | 3.50E-40 | 1.3 | SF3B3     | 1.832116788 |
| TXN1          | 1.48E-44 | 0.3559922 | 0.771 | 0.664 | 3.56E-40 | 1.3 | TXN       | 1.161144578 |
| PPP1R14C2     | 1.80E-44 | 0.2613479 | 0.182 | 0.087 | 4.35E-40 | 1.3 | PPP1R14C  | 2.091954023 |
| CCT82         | 2.63E-44 | 0.3097086 | 0.414 | 0.266 | 6.34E-40 | 1.3 | CCT8      | 1.556390977 |
| DCHS2         | 3.16E-44 | 0.3062079 | 0.149 | 0.066 | 7.63E-40 | 1.3 | DCHS2     | 2.257575758 |
| S100A22       | 3.63E-44 | 0.308033  | 0.121 | 0.049 | 8.75E-40 | 1.3 | S100A2    | 2.469387755 |
| RP11-66B24.51 | 4.04E-44 | 0.2510274 | 0.113 | 0.044 | 9.73E-40 | 1.3 | RP11-66B2 | 2.568181818 |
| NIPAL3        | 4.17E-44 | 0.2321855 | 0.12  | 0.048 | 1.00E-39 | 1.3 | NIPAL3    | 2.5         |
| PTN2          | 4.64E-44 | 0.4046572 | 0.203 | 0.103 | 1.12E-39 | 1.3 | PTN       | 1.970873786 |
| RPL10A2       | 4.66E-44 | 0.381184  | 0.791 | 0.708 | 1.12E-39 | 1.3 | RPL10A    | 1.117231638 |
| AMBRA11       | 5.13E-44 | 0.5108732 | 0.75  | 0.668 | 1.24E-39 | 1.3 | AMBRA1    | 1.122754491 |
| RPL242        | 5.60E-44 | 0.2461127 | 0.942 | 0.913 | 1.35E-39 | 1.3 | RPL24     | 1.031763417 |
| KRT232        | 6.74E-44 | 0.302504  | 0.249 | 0.136 | 1.62E-39 | 1.3 | KRT23     | 1.830882353 |
| C15orf41      | 1.19E-43 | 0.24494   | 0.112 | 0.044 | 2.88E-39 | 1.3 | C15orf41  | 2.545454545 |
| LOXL4         | 1.21E-43 | 0.1137547 | 0.031 | 0.004 | 2.92E-39 | 1.3 | LOXL4     | 7.75        |

|              |          |           |       |       |          |     |           |             |
|--------------|----------|-----------|-------|-------|----------|-----|-----------|-------------|
| SMC52        | 1.32E-43 | 0.3051689 | 0.442 | 0.289 | 3.17E-39 | 1.3 | SMC5      | 1.529411765 |
| HNRNPA12     | 1.33E-43 | 0.1809192 | 0.874 | 0.745 | 3.20E-39 | 1.3 | HNRNPA1   | 1.173154362 |
| FAM172A2     | 1.43E-43 | 0.3262011 | 0.752 | 0.601 | 3.44E-39 | 1.3 | FAM172A   | 1.25124792  |
| LAP3         | 1.66E-43 | 0.2956913 | 0.208 | 0.108 | 4.01E-39 | 1.3 | LAP3      | 1.925925926 |
| PKD2         | 2.03E-43 | 0.2456608 | 0.121 | 0.049 | 4.89E-39 | 1.3 | PKD2      | 2.469387755 |
| NR3C21       | 3.42E-43 | 0.2839967 | 0.16  | 0.075 | 8.26E-39 | 1.3 | NR3C2     | 2.133333333 |
| COL6A11      | 3.45E-43 | 0.1815532 | 0.061 | 0.016 | 8.32E-39 | 1.3 | COL6A1    | 3.8125      |
| EIF3I2       | 4.73E-43 | 0.3381851 | 0.717 | 0.58  | 1.14E-38 | 1.3 | EIF3I     | 1.236206897 |
| SLC4A71      | 4.77E-43 | 0.3361554 | 0.408 | 0.266 | 1.15E-38 | 1.3 | SLC4A7    | 1.533834586 |
| PLOD11       | 6.06E-43 | 0.1893818 | 0.102 | 0.038 | 1.46E-38 | 1.3 | PLOD1     | 2.684210526 |
| ANPEP1       | 7.82E-43 | 0.2080852 | 0.061 | 0.017 | 1.89E-38 | 1.3 | ANPEP     | 3.588235294 |
| TUSC31       | 1.30E-42 | 0.2622661 | 0.192 | 0.096 | 3.14E-38 | 1.3 | TUSC3     | 2           |
| VMP11        | 1.51E-42 | 0.3352938 | 0.838 | 0.736 | 3.64E-38 | 1.3 | VMP1      | 1.138586957 |
| FAM60A2      | 1.88E-42 | 0.3732124 | 0.441 | 0.294 | 4.54E-38 | 1.3 | FAM60A    | 1.5         |
| LINC003421   | 2.46E-42 | 0.2111948 | 0.092 | 0.033 | 5.92E-38 | 1.3 | LINC00342 | 2.787878788 |
| PGM1         | 2.51E-42 | 0.3233444 | 0.16  | 0.075 | 6.05E-38 | 1.3 | PGM1      | 2.133333333 |
| PLEKHA72     | 2.91E-42 | 0.1885805 | 0.977 | 0.98  | 7.02E-38 | 1.3 | PLEKHA7   | 0.996938776 |
| FAM157C1     | 3.49E-42 | 0.2606513 | 0.16  | 0.075 | 8.43E-38 | 1.3 | FAM157C   | 2.133333333 |
| EBP          | 3.83E-42 | 0.2613244 | 0.205 | 0.106 | 9.23E-38 | 1.3 | EBP       | 1.933962264 |
| KIFC3        | 4.02E-42 | 0.1694977 | 0.07  | 0.021 | 9.70E-38 | 1.3 | KIFC3     | 3.333333333 |
| OTUD6B-AS1   | 4.07E-42 | 0.2648523 | 0.279 | 0.159 | 9.82E-38 | 1.3 | OTUD6B-A  | 1.754716981 |
| TPT1-AS12    | 4.17E-42 | 0.2685836 | 0.36  | 0.22  | 1.01E-37 | 1.3 | TPT1-AS1  | 1.636363636 |
| CTC-471J1.92 | 4.88E-42 | 0.2950131 | 0.765 | 0.62  | 1.18E-37 | 1.3 | CTC-471J1 | 1.233870968 |
| FRMD51       | 5.77E-42 | 0.3460714 | 0.226 | 0.123 | 1.39E-37 | 1.3 | FRMD5     | 1.837398374 |
| MAGED1       | 5.97E-42 | 0.2826812 | 0.166 | 0.08  | 1.44E-37 | 1.3 | MAGED1    | 2.075       |
| AKAP6        | 7.54E-42 | 0.1962657 | 0.079 | 0.026 | 1.82E-37 | 1.3 | AKAP6     | 3.038461538 |
| TMEM1232     | 8.86E-42 | 0.3283287 | 0.433 | 0.288 | 2.14E-37 | 1.3 | TMEM123   | 1.503472222 |
| NLGN4X1      | 1.07E-41 | 0.2591566 | 0.102 | 0.039 | 2.58E-37 | 1.3 | NLGN4X    | 2.615384615 |
| RPS22        | 1.07E-41 | 0.4087664 | 0.401 | 0.26  | 2.58E-37 | 1.3 | RPS2      | 1.542307692 |
| MDH11        | 1.12E-41 | 0.3137786 | 0.403 | 0.261 | 2.70E-37 | 1.3 | MDH1      | 1.544061303 |
| CACNB2       | 1.17E-41 | 0.3255001 | 0.176 | 0.087 | 2.82E-37 | 1.3 | CACNB2    | 2.022988506 |
| PID12        | 1.26E-41 | 0.3348641 | 0.148 | 0.068 | 3.03E-37 | 1.3 | PID1      | 2.176470588 |
| NMI          | 1.28E-41 | 0.2200596 | 0.145 | 0.066 | 3.10E-37 | 1.3 | NMI       | 2.196969697 |
| HELB         | 1.47E-41 | 0.2670289 | 0.186 | 0.093 | 3.54E-37 | 1.3 | HELB      | 2           |
| AARD         | 2.00E-41 | 0.1065907 | 0.04  | 0.008 | 4.83E-37 | 1.3 | AARD      | 5           |
| RP11-77K12.4 | 2.87E-41 | 0.126865  | 0.054 | 0.014 | 6.93E-37 | 1.3 | RP11-77K1 | 3.857142857 |
| B3GNT52      | 4.82E-41 | 0.2597695 | 0.119 | 0.05  | 1.16E-36 | 1.3 | B3GNT5    | 2.38        |
| SPDYE161     | 6.66E-41 | 0.2254011 | 0.127 | 0.055 | 1.61E-36 | 1.3 | SPDYE16   | 2.309090909 |
| SSR32        | 7.22E-41 | 0.2527839 | 0.596 | 0.426 | 1.74E-36 | 1.3 | SSR3      | 1.399061033 |
| C1RL         | 8.37E-41 | 0.2548057 | 0.151 | 0.07  | 2.02E-36 | 1.3 | C1RL      | 2.157142857 |
| RNF2171      | 1.16E-40 | 0.2596406 | 0.135 | 0.06  | 2.80E-36 | 1.3 | RNF217    | 2.25        |
| C1S          | 1.94E-40 | 0.2234153 | 0.138 | 0.062 | 4.67E-36 | 1.3 | C1S       | 2.225806452 |
| PDE9A1       | 2.79E-40 | 0.2011424 | 0.093 | 0.034 | 6.74E-36 | 1.3 | PDE9A     | 2.735294118 |
| ZNF33B       | 3.22E-40 | 0.2801331 | 0.228 | 0.124 | 7.77E-36 | 1.3 | ZNF33B    | 1.838709677 |
| HMGA12       | 4.56E-40 | 0.3340738 | 0.158 | 0.076 | 1.10E-35 | 1.3 | HMGA1     | 2.078947368 |
| RASGRP1      | 6.12E-40 | 0.2073858 | 0.138 | 0.062 | 1.48E-35 | 1.3 | RASGRP1   | 2.225806452 |
| FGF23        | 1.19E-39 | 0.2322327 | 0.096 | 0.037 | 2.87E-35 | 1.3 | FGF2      | 2.594594595 |
| TC2N1        | 1.32E-39 | 0.3108061 | 0.41  | 0.27  | 3.18E-35 | 1.3 | TC2N      | 1.518518519 |
| C8orf592     | 1.41E-39 | 0.285013  | 0.414 | 0.271 | 3.40E-35 | 1.3 | C8orf59   | 1.527675277 |
| MRPL13       | 1.45E-39 | 0.2600172 | 0.27  | 0.155 | 3.50E-35 | 1.3 | MRPL13    | 1.741935484 |
| TNFSF10      | 1.49E-39 | 0.1047139 | 0.638 | 0.453 | 3.60E-35 | 1.3 | TNFSF10   | 1.408388521 |
| APP          | 1.65E-39 | 0.3724386 | 0.866 | 0.764 | 3.98E-35 | 1.3 | APP       | 1.133507853 |

|            |          |           |       |       |          |     |           |             |
|------------|----------|-----------|-------|-------|----------|-----|-----------|-------------|
| OSBPL101   | 1.90E-39 | 0.3424106 | 0.185 | 0.094 | 4.58E-35 | 1.3 | OSBPL10   | 1.968085106 |
| PELI21     | 2.34E-39 | 0.2168832 | 0.11  | 0.045 | 5.63E-35 | 1.3 | PELI2     | 2.444444444 |
| XDH2       | 2.39E-39 | 0.3094656 | 0.12  | 0.051 | 5.76E-35 | 1.3 | XDH       | 2.352941176 |
| CALM1      | 2.41E-39 | 0.3129369 | 0.336 | 0.209 | 5.82E-35 | 1.3 | CALM1     | 1.607655502 |
| ANKRD62    | 2.50E-39 | 0.2041799 | 0.107 | 0.043 | 6.03E-35 | 1.3 | ANKRD6    | 2.488372093 |
| GGPS1      | 2.94E-39 | 0.2581174 | 0.299 | 0.178 | 7.09E-35 | 1.3 | GGPS1     | 1.679775281 |
| RBX1       | 3.28E-39 | 0.3014094 | 0.575 | 0.423 | 7.90E-35 | 1.3 | RBX1      | 1.359338061 |
| UBE2V21    | 4.08E-39 | 0.2872385 | 0.368 | 0.236 | 9.85E-35 | 1.3 | UBE2V2    | 1.559322034 |
| MOB4       | 4.32E-39 | 0.2547385 | 0.256 | 0.146 | 1.04E-34 | 1.3 | MOB4      | 1.753424658 |
| EPB41L22   | 4.37E-39 | 0.1708744 | 0.198 | 0.102 | 1.05E-34 | 1.3 | EPB41L2   | 1.941176471 |
| ARHGAP24   | 5.19E-39 | 0.2515966 | 0.08  | 0.028 | 1.25E-34 | 1.3 | ARHGAP24  | 2.857142857 |
| MINK11     | 5.32E-39 | 0.2722115 | 0.177 | 0.09  | 1.28E-34 | 1.3 | MINK1     | 1.966666667 |
| VPS292     | 5.57E-39 | 0.3158902 | 0.45  | 0.305 | 1.34E-34 | 1.3 | VPS29     | 1.475409836 |
| MBP1       | 7.90E-39 | 0.2676884 | 0.201 | 0.106 | 1.91E-34 | 1.3 | MBP       | 1.896226415 |
| MED31      | 1.02E-38 | 0.2715216 | 0.28  | 0.165 | 2.47E-34 | 1.3 | MED31     | 1.696969697 |
| SPIDR      | 1.09E-38 | 0.3254078 | 0.746 | 0.584 | 2.63E-34 | 1.3 | SPIDR     | 1.27739726  |
| UCK21      | 1.12E-38 | 0.234686  | 0.177 | 0.089 | 2.69E-34 | 1.3 | UCK2      | 1.988764045 |
| ARHGEF102  | 1.30E-38 | 0.2373026 | 0.335 | 0.206 | 3.14E-34 | 1.3 | ARHGEF10  | 1.626213592 |
| LSM81      | 1.35E-38 | 0.2207236 | 0.32  | 0.193 | 3.25E-34 | 1.3 | LSM8      | 1.658031088 |
| FOXO11     | 1.72E-38 | 0.305847  | 0.299 | 0.181 | 4.14E-34 | 1.3 | FOXO1     | 1.651933702 |
| RNF13      | 1.85E-38 | 0.3096922 | 0.395 | 0.259 | 4.47E-34 | 1.3 | RNF13     | 1.525096525 |
| R3HDM2     | 1.86E-38 | 0.3119308 | 0.203 | 0.108 | 4.48E-34 | 1.3 | R3HDM2    | 1.87962963  |
| MT-CYB2    | 1.93E-38 | 0.18166   | 0.986 | 0.992 | 4.66E-34 | 1.3 | MT-CYB    | 0.993951613 |
| FAM3B      | 1.95E-38 | 0.1807682 | 0.097 | 0.037 | 4.71E-34 | 1.3 | FAM3B     | 2.621621622 |
| DNER       | 2.05E-38 | 0.3080781 | 0.098 | 0.039 | 4.94E-34 | 1.3 | DNER      | 2.512820513 |
| LRRC75A2   | 2.18E-38 | 0.3472456 | 0.227 | 0.127 | 5.25E-34 | 1.3 | LRRC75A   | 1.787401575 |
| SLC23A21   | 2.42E-38 | 0.1730073 | 0.086 | 0.031 | 5.84E-34 | 1.3 | SLC23A2   | 2.774193548 |
| PGBD51     | 2.52E-38 | 0.1898028 | 0.09  | 0.034 | 6.07E-34 | 1.3 | PGBD5     | 2.647058824 |
| C15orf48   | 2.84E-38 | 0.7437974 | 0.593 | 0.488 | 6.84E-34 | 1.3 | C15orf48  | 1.215163934 |
| LINC009691 | 3.53E-38 | 0.2515565 | 0.317 | 0.194 | 8.50E-34 | 1.3 | LINC00969 | 1.634020619 |
| RBPMS2     | 3.83E-38 | 0.2849917 | 0.794 | 0.643 | 9.23E-34 | 1.3 | RBPMS     | 1.234836703 |
| RAB29      | 5.63E-38 | 0.1753373 | 0.106 | 0.043 | 1.36E-33 | 1.3 | RAB29     | 2.465116279 |
| TRMT10C1   | 6.75E-38 | 0.2048139 | 0.166 | 0.082 | 1.63E-33 | 1.3 | TRMT10C   | 2.024390244 |
| C1R        | 1.27E-37 | 0.2046463 | 0.086 | 0.032 | 3.06E-33 | 1.3 | C1R       | 2.6875      |
| SMIM81     | 1.32E-37 | 0.1911506 | 0.119 | 0.051 | 3.18E-33 | 1.3 | SMIM8     | 2.333333333 |
| FIGN       | 2.00E-37 | 0.3172097 | 0.182 | 0.094 | 4.83E-33 | 1.3 | FIGN      | 1.936170213 |
| RSL1D12    | 2.08E-37 | 0.1975464 | 0.603 | 0.434 | 5.03E-33 | 1.3 | RSL1D1    | 1.389400922 |
| YBX11      | 2.10E-37 | 0.3245062 | 0.413 | 0.28  | 5.06E-33 | 1.3 | YBX1      | 1.475       |
| HIBADH1    | 2.84E-37 | 0.2820552 | 0.206 | 0.112 | 6.85E-33 | 1.3 | HIBADH    | 1.839285714 |
| IDI1       | 3.57E-37 | 0.2607127 | 0.333 | 0.209 | 8.60E-33 | 1.3 | IDI1      | 1.593301435 |
| CEBPZOS    | 3.96E-37 | 0.2446059 | 0.199 | 0.106 | 9.55E-33 | 1.3 | CEBPZOS   | 1.877358491 |
| VDAC32     | 5.05E-37 | 0.2799174 | 0.388 | 0.254 | 1.22E-32 | 1.3 | VDAC3     | 1.527559055 |
| GAPDH      | 5.45E-37 | 0.5220987 | 0.682 | 0.552 | 1.32E-32 | 1.3 | GAPDH     | 1.235507246 |
| ZNF33A     | 8.44E-37 | 0.2791655 | 0.326 | 0.203 | 2.03E-32 | 1.3 | ZNF33A    | 1.60591133  |
| STIL1      | 8.98E-37 | 0.2110841 | 0.105 | 0.044 | 2.16E-32 | 1.3 | STIL      | 2.386363636 |
| FUT9       | 1.32E-36 | 0.1255055 | 0.052 | 0.014 | 3.17E-32 | 1.3 | FUT9      | 3.714285714 |
| SNX23      | 1.36E-36 | 0.2344188 | 0.225 | 0.125 | 3.27E-32 | 1.3 | SNX2      | 1.8         |
| ESD2       | 1.85E-36 | 0.2296419 | 0.448 | 0.299 | 4.47E-32 | 1.3 | ESD       | 1.498327759 |
| SAV11      | 1.86E-36 | 0.2902794 | 0.42  | 0.28  | 4.48E-32 | 1.3 | SAV1      | 1.5         |
| NRG2       | 2.42E-36 | 0.2046489 | 0.072 | 0.025 | 5.83E-32 | 1.3 | NRG2      | 2.88        |
| NAPG       | 3.41E-36 | 0.2449629 | 0.283 | 0.169 | 8.23E-32 | 1.3 | NAPG      | 1.674556213 |
| RAP1GAP2   | 3.50E-36 | 0.3349006 | 0.231 | 0.132 | 8.44E-32 | 1.3 | RAP1GAP2  | 1.75        |

|                |          |           |       |       |          |     |            |             |
|----------------|----------|-----------|-------|-------|----------|-----|------------|-------------|
| OLFM4          | 3.74E-36 | 0.3333829 | 0.053 | 0.015 | 9.01E-32 | 1.3 | OLFM4      | 3.533333333 |
| MRPS14         | 3.81E-36 | 0.2245056 | 0.217 | 0.12  | 9.18E-32 | 1.3 | MRPS14     | 1.808333333 |
| PDCD101        | 4.14E-36 | 0.290783  | 0.368 | 0.239 | 9.99E-32 | 1.3 | PDCD10     | 1.539748954 |
| UTP202         | 4.68E-36 | 0.1869535 | 0.103 | 0.042 | 1.13E-31 | 1.3 | UTP20      | 2.452380952 |
| ARPC3          | 5.11E-36 | 0.2915906 | 0.766 | 0.649 | 1.23E-31 | 1.3 | ARPC3      | 1.18027735  |
| GRB142         | 5.20E-36 | 0.3079709 | 0.54  | 0.394 | 1.25E-31 | 1.3 | GRB14      | 1.370558376 |
| NFIX1          | 5.57E-36 | 0.2581814 | 0.13  | 0.06  | 1.34E-31 | 1.3 | NFIX       | 2.166666667 |
| BTF3L4         | 6.99E-36 | 0.2518454 | 0.344 | 0.22  | 1.69E-31 | 1.3 | BTF3L4     | 1.563636364 |
| SSR22          | 7.47E-36 | 0.2529681 | 0.79  | 0.673 | 1.80E-31 | 1.3 | SSR2       | 1.17384844  |
| ATP1A1         | 8.60E-36 | 0.3201923 | 0.635 | 0.491 | 2.07E-31 | 1.3 | ATP1A1     | 1.293279022 |
| HSDL2          | 8.97E-36 | 0.2151537 | 0.155 | 0.076 | 2.16E-31 | 1.3 | HSDL2      | 2.039473684 |
| UQCRHL2        | 1.04E-35 | 0.2335007 | 0.285 | 0.171 | 2.51E-31 | 1.3 | UQCRHL     | 1.666666667 |
| ASCC1          | 1.40E-35 | 0.2541957 | 0.231 | 0.131 | 3.37E-31 | 1.3 | ASCC1      | 1.763358779 |
| MARCH3         | 1.57E-35 | 0.3725644 | 0.244 | 0.144 | 3.79E-31 | 1.3 | MARCH3     | 1.694444444 |
| ARL15          | 1.82E-35 | 0.2980249 | 0.313 | 0.196 | 4.38E-31 | 1.3 | ARL15      | 1.596938776 |
| LY96           | 1.88E-35 | 0.1140408 | 0.041 | 0.01  | 4.53E-31 | 1.3 | LY96       | 4.1         |
| ACO1           | 1.89E-35 | 0.1506765 | 0.086 | 0.033 | 4.55E-31 | 1.3 | ACO1       | 2.606060606 |
| AIMP12         | 2.00E-35 | 0.2764819 | 0.425 | 0.287 | 4.82E-31 | 1.3 | AIMP1      | 1.480836237 |
| RP1-28O10.1    | 2.20E-35 | 0.1553749 | 0.084 | 0.031 | 5.30E-31 | 1.3 | RP1-28O10  | 2.709677419 |
| CRTC3          | 2.26E-35 | 0.2743354 | 0.313 | 0.197 | 5.45E-31 | 1.3 | CRTC3      | 1.588832487 |
| SOX62          | 3.35E-35 | 0.3050363 | 0.153 | 0.076 | 8.08E-31 | 1.3 | SOX6       | 2.013157895 |
| DDR21          | 3.99E-35 | 0.2724797 | 0.147 | 0.072 | 9.62E-31 | 1.3 | DDR2       | 2.041666667 |
| PELI12         | 4.23E-35 | 0.2679148 | 0.459 | 0.314 | 1.02E-30 | 1.3 | PELI1      | 1.461783439 |
| ATP1B31        | 4.77E-35 | 0.292125  | 0.367 | 0.242 | 1.15E-30 | 1.3 | ATP1B3     | 1.516528926 |
| RGL1           | 6.70E-35 | 0.1788859 | 0.107 | 0.046 | 1.62E-30 | 1.3 | RGL1       | 2.326086957 |
| HGSNAT         | 9.29E-35 | 0.2526627 | 0.219 | 0.124 | 2.24E-30 | 1.3 | HGSNAT     | 1.766129032 |
| RASSF82        | 9.77E-35 | 0.2704111 | 0.183 | 0.097 | 2.36E-30 | 1.3 | RASSF8     | 1.886597938 |
| TRIM561        | 1.00E-34 | 0.2777391 | 0.244 | 0.143 | 2.41E-30 | 1.3 | TRIM56     | 1.706293706 |
| RSU1           | 1.18E-34 | 0.3060033 | 0.292 | 0.182 | 2.83E-30 | 1.3 | RSU1       | 1.604395604 |
| PSAT11         | 1.38E-34 | 0.1127429 | 0.046 | 0.012 | 3.33E-30 | 1.3 | PSAT1      | 3.833333333 |
| BBS121         | 1.63E-34 | 0.1143749 | 0.045 | 0.012 | 3.93E-30 | 1.3 | BBS12      | 3.75        |
| SIRPA          | 1.97E-34 | 0.1489193 | 0.081 | 0.03  | 4.74E-30 | 1.3 | SIRPA      | 2.7         |
| ZNF124         | 2.97E-34 | 0.1862483 | 0.111 | 0.048 | 7.16E-30 | 1.3 | ZNF124     | 2.3125      |
| TNS3           | 3.46E-34 | 0.2896544 | 0.132 | 0.063 | 8.35E-30 | 1.3 | TNS3       | 2.095238095 |
| HINT11         | 3.93E-34 | 0.3060311 | 0.71  | 0.589 | 9.47E-30 | 1.3 | HINT1      | 1.205432937 |
| TPM42          | 4.14E-34 | 0.3812522 | 0.493 | 0.359 | 9.97E-30 | 1.3 | TPM4       | 1.373259053 |
| FAM3C          | 7.36E-34 | 0.2910004 | 0.227 | 0.131 | 1.77E-29 | 1.3 | FAM3C      | 1.732824427 |
| TFCP2          | 7.60E-34 | 0.2324668 | 0.188 | 0.102 | 1.83E-29 | 1.3 | TFCP2      | 1.843137255 |
| RP11-631N16.21 | 7.89E-34 | 0.1879098 | 0.092 | 0.037 | 1.90E-29 | 1.3 | RP11-631N  | 2.486486486 |
| LINC00693      | 7.93E-34 | 0.1648062 | 0.054 | 0.016 | 1.91E-29 | 1.3 | LINC00693  | 3.375       |
| CYB5B          | 8.73E-34 | 0.2193024 | 0.22  | 0.124 | 2.11E-29 | 1.3 | CYB5B      | 1.774193548 |
| C11orf80       | 8.78E-34 | 0.2871748 | 0.283 | 0.175 | 2.12E-29 | 1.3 | C11orf80   | 1.617142857 |
| RP11-817J15.22 | 8.94E-34 | 0.1497608 | 0.107 | 0.046 | 2.16E-29 | 1.3 | RP11-817J1 | 2.326086957 |
| DNAJC62        | 9.54E-34 | 0.2125021 | 0.12  | 0.054 | 2.30E-29 | 1.3 | DNAJC6     | 2.222222222 |
| RNF144B        | 1.04E-33 | 0.3426094 | 0.398 | 0.274 | 2.50E-29 | 1.3 | RNF144B    | 1.452554745 |
| ZNF708         | 1.14E-33 | 0.2380549 | 0.128 | 0.06  | 2.75E-29 | 1.3 | ZNF708     | 2.133333333 |
| ACSS21         | 1.33E-33 | 0.2509406 | 0.248 | 0.146 | 3.21E-29 | 1.3 | ACSS2      | 1.698630137 |
| TUBB61         | 2.83E-33 | 0.1493593 | 0.073 | 0.026 | 6.83E-29 | 1.3 | TUBB6      | 2.807692308 |
| CHCHD32        | 3.13E-33 | 0.259972  | 0.89  | 0.83  | 7.55E-29 | 1.3 | CHCHD3     | 1.072289157 |
| C5orf281       | 3.37E-33 | 0.2341755 | 0.21  | 0.118 | 8.12E-29 | 1.3 | C5orf28    | 1.779661017 |
| DTX21          | 3.48E-33 | 0.2378235 | 0.127 | 0.06  | 8.40E-29 | 1.3 | DTX2       | 2.116666667 |
| PDGFC1         | 3.55E-33 | 0.2373352 | 0.333 | 0.212 | 8.56E-29 | 1.3 | PDGFC      | 1.570754717 |

|               |          |           |       |       |          |     |           |             |
|---------------|----------|-----------|-------|-------|----------|-----|-----------|-------------|
| XKR6          | 3.73E-33 | 0.30906   | 0.245 | 0.147 | 8.99E-29 | 1.3 | XKR6      | 1.666666667 |
| TRPS1         | 3.89E-33 | 0.3073221 | 0.846 | 0.725 | 9.38E-29 | 1.3 | TRPS1     | 1.166896552 |
| CEACAM11      | 3.94E-33 | 0.1895309 | 0.141 | 0.069 | 9.50E-29 | 1.3 | CEACAM1   | 2.043478261 |
| CECR71        | 4.08E-33 | 0.1676117 | 0.094 | 0.039 | 9.84E-29 | 1.3 | CECR7     | 2.41025641  |
| FBXO2         | 4.25E-33 | 0.1246862 | 0.049 | 0.014 | 1.03E-28 | 1.3 | FBXO2     | 3.5         |
| SPX           | 4.82E-33 | 0.1245169 | 0.06  | 0.02  | 1.16E-28 | 1.3 | SPX       | 3           |
| PSME21        | 5.71E-33 | 0.4632211 | 0.395 | 0.281 | 1.38E-28 | 1.3 | PSME2     | 1.40569395  |
| DDX242        | 6.10E-33 | 0.239248  | 0.644 | 0.49  | 1.47E-28 | 1.3 | DDX24     | 1.314285714 |
| ST5           | 6.83E-33 | 0.1630691 | 0.476 | 0.325 | 1.65E-28 | 1.3 | ST5       | 1.464615385 |
| PLAGL12       | 7.46E-33 | 0.181499  | 0.086 | 0.034 | 1.80E-28 | 1.3 | PLAGL1    | 2.529411765 |
| NXN2          | 7.81E-33 | 0.2104832 | 0.166 | 0.086 | 1.88E-28 | 1.3 | NXN       | 1.930232558 |
| SPARCL12      | 9.85E-33 | 0.182761  | 0.086 | 0.034 | 2.38E-28 | 1.3 | SPARCL1   | 2.529411765 |
| SESTD12       | 1.03E-32 | 0.2750933 | 0.619 | 0.472 | 2.50E-28 | 1.3 | SESTD1    | 1.311440678 |
| IRAK2         | 1.07E-32 | 0.2669277 | 0.21  | 0.119 | 2.59E-28 | 1.3 | IRAK2     | 1.764705882 |
| TCN1          | 1.11E-32 | 0.2829862 | 0.053 | 0.016 | 2.67E-28 | 1.3 | TCN1      | 3.3125      |
| LRRC16A1      | 1.31E-32 | 0.2861727 | 0.253 | 0.152 | 3.16E-28 | 1.3 | LRRC16A   | 1.664473684 |
| C1QTNF1       | 1.44E-32 | 0.1471866 | 0.057 | 0.018 | 3.47E-28 | 1.3 | C1QTNF1   | 3.166666667 |
| ATR           | 1.78E-32 | 0.2276555 | 0.223 | 0.128 | 4.30E-28 | 1.3 | ATR       | 1.7421875   |
| NDUFS52       | 2.41E-32 | 0.246739  | 0.847 | 0.763 | 5.81E-28 | 1.3 | NDUFS5    | 1.110091743 |
| CAV11         | 2.64E-32 | 0.1482031 | 0.072 | 0.026 | 6.36E-28 | 1.3 | CAV1      | 2.769230769 |
| CCAR1         | 2.90E-32 | 0.2876327 | 0.348 | 0.229 | 6.98E-28 | 1.3 | CCAR1     | 1.519650655 |
| MAPK14        | 3.02E-32 | 0.2566026 | 0.244 | 0.145 | 7.27E-28 | 1.3 | MAPK14    | 1.682758621 |
| DHCR24        | 3.36E-32 | 0.2257204 | 0.286 | 0.177 | 8.09E-28 | 1.3 | DHCR24    | 1.615819209 |
| CSTB1         | 6.16E-32 | 0.4211735 | 0.226 | 0.135 | 1.48E-27 | 1.3 | CSTB      | 1.674074074 |
| CCDC1461      | 6.73E-32 | 0.27279   | 0.22  | 0.129 | 1.62E-27 | 1.3 | CCDC146   | 1.705426357 |
| TMOD11        | 6.89E-32 | 0.2362421 | 0.139 | 0.069 | 1.66E-27 | 1.3 | TMOD1     | 2.014492754 |
| PLA2G161      | 8.18E-32 | 0.2883279 | 0.162 | 0.086 | 1.97E-27 | 1.3 | PLA2G16   | 1.88372093  |
| KNOP1         | 8.58E-32 | 0.2150923 | 0.232 | 0.136 | 2.07E-27 | 1.3 | KNOP1     | 1.705882353 |
| TPM11         | 9.05E-32 | 0.3468497 | 0.645 | 0.512 | 2.18E-27 | 1.3 | TPM1      | 1.259765625 |
| TMCO4         | 1.03E-31 | 0.214322  | 0.127 | 0.061 | 2.49E-27 | 1.3 | TMCO4     | 2.081967213 |
| DIAPH2-AS1    | 1.15E-31 | 0.1589813 | 0.064 | 0.022 | 2.78E-27 | 1.3 | DIAPH2-AS | 2.909090909 |
| SNED1         | 1.20E-31 | 0.1564482 | 0.076 | 0.029 | 2.88E-27 | 1.3 | SNED1     | 2.620689655 |
| CLINT12       | 1.30E-31 | 0.2328665 | 0.361 | 0.235 | 3.14E-27 | 1.3 | CLINT1    | 1.536170213 |
| CSTA          | 1.36E-31 | 0.1058457 | 0.061 | 0.02  | 3.27E-27 | 1.3 | CSTA      | 3.05        |
| FAF1          | 1.66E-31 | 0.3214812 | 0.335 | 0.22  | 4.00E-27 | 1.3 | FAF1      | 1.522727273 |
| DOCK1         | 1.83E-31 | 0.3136089 | 0.406 | 0.278 | 4.42E-27 | 1.3 | DOCK1     | 1.460431655 |
| STEAP3        | 2.25E-31 | 0.1555545 | 0.066 | 0.023 | 5.43E-27 | 1.3 | STEAP3    | 2.869565217 |
| OGFRL11       | 3.59E-31 | 0.2275977 | 0.28  | 0.174 | 8.65E-27 | 1.3 | OGFRL1    | 1.609195402 |
| PITPNC11      | 4.85E-31 | 0.3175926 | 0.262 | 0.164 | 1.17E-26 | 1.3 | PITPNC1   | 1.597560976 |
| PDSS2         | 6.76E-31 | 0.2560169 | 0.204 | 0.117 | 1.63E-26 | 1.3 | PDSS2     | 1.743589744 |
| RPS82         | 6.83E-31 | 0.3777277 | 0.787 | 0.732 | 1.65E-26 | 1.3 | RPS8      | 1.075136612 |
| RANBP171      | 6.99E-31 | 0.2617432 | 0.175 | 0.095 | 1.69E-26 | 1.3 | RANBP17   | 1.842105263 |
| CMIP2         | 7.31E-31 | 0.3060254 | 0.373 | 0.254 | 1.76E-26 | 1.3 | CMIP      | 1.468503937 |
| SNRPE2        | 7.59E-31 | 0.2401356 | 0.648 | 0.506 | 1.83E-26 | 1.3 | SNRPE     | 1.280632411 |
| AGPS1         | 7.77E-31 | 0.1915618 | 0.087 | 0.036 | 1.87E-26 | 1.3 | AGPS      | 2.416666667 |
| LINC01138     | 8.09E-31 | 0.257775  | 0.257 | 0.159 | 1.95E-26 | 1.3 | LINC01138 | 1.616352201 |
| ENPP6         | 8.94E-31 | 0.1176662 | 0.062 | 0.021 | 2.16E-26 | 1.3 | ENPP6     | 2.952380952 |
| XPNPEP11      | 1.05E-30 | 0.1904874 | 0.147 | 0.076 | 2.53E-26 | 1.3 | XPNPEP1   | 1.934210526 |
| FBXO321       | 1.21E-30 | 0.517713  | 0.469 | 0.358 | 2.91E-26 | 1.3 | FBXO32    | 1.310055866 |
| RP11-366L20.2 | 1.31E-30 | 0.1006847 | 0.037 | 0.009 | 3.17E-26 | 1.3 | RP11-366L | 4.111111111 |
| BPNT1         | 1.69E-30 | 0.1563    | 0.093 | 0.04  | 4.09E-26 | 1.3 | BPNT1     | 2.325       |
| PRKCE         | 2.50E-30 | 0.3484593 | 0.289 | 0.186 | 6.03E-26 | 1.3 | PRKCE     | 1.553763441 |

|               |          |           |       |       |          |     |           |             |
|---------------|----------|-----------|-------|-------|----------|-----|-----------|-------------|
| LINC-PINT     | 2.64E-30 | 0.3384954 | 0.703 | 0.561 | 6.37E-26 | 1.3 | LINC-PINT | 1.25311943  |
| CRIPT         | 2.92E-30 | 0.2136172 | 0.276 | 0.172 | 7.04E-26 | 1.3 | CRIPT     | 1.604651163 |
| AKT32         | 3.15E-30 | 0.2744186 | 0.466 | 0.332 | 7.60E-26 | 1.3 | AKT3      | 1.403614458 |
| AC008074.31   | 3.58E-30 | 0.1621801 | 0.1   | 0.044 | 8.64E-26 | 1.3 | AC008074. | 2.272727273 |
| CLDN161       | 3.68E-30 | 0.1262039 | 0.052 | 0.017 | 8.87E-26 | 1.3 | CLDN16    | 3.058823529 |
| TNFRSF21      | 3.84E-30 | 0.1893067 | 0.107 | 0.049 | 9.25E-26 | 1.3 | TNFRSF21  | 2.183673469 |
| RPS52         | 3.99E-30 | 0.5791431 | 0.319 | 0.215 | 9.63E-26 | 1.3 | RPS5      | 1.48372093  |
| NEMF1         | 4.07E-30 | 0.2370729 | 0.373 | 0.252 | 9.81E-26 | 1.3 | NEMF      | 1.48015873  |
| HTATIP2       | 4.63E-30 | 0.1967123 | 0.161 | 0.086 | 1.12E-25 | 1.3 | HTATIP2   | 1.872093023 |
| DDIT42        | 4.89E-30 | 0.3069721 | 0.243 | 0.15  | 1.18E-25 | 1.3 | DDIT4     | 1.62        |
| SNCA          | 5.05E-30 | 0.1254325 | 0.037 | 0.009 | 1.22E-25 | 1.3 | SNCA      | 4.111111111 |
| PSMB8         | 5.54E-30 | 0.1964463 | 0.141 | 0.072 | 1.34E-25 | 1.3 | PSMB8     | 1.958333333 |
| PAK32         | 6.43E-30 | 0.1437183 | 0.092 | 0.039 | 1.55E-25 | 1.3 | PAK3      | 2.358974359 |
| RPL132        | 6.84E-30 | 0.3277314 | 0.537 | 0.405 | 1.65E-25 | 1.3 | RPL13     | 1.325925926 |
| BMS1          | 9.65E-30 | 0.2060829 | 0.145 | 0.075 | 2.33E-25 | 1.3 | BMS1      | 1.933333333 |
| NCK11         | 1.02E-29 | 0.2325976 | 0.178 | 0.099 | 2.45E-25 | 1.3 | NCK1      | 1.797979798 |
| RP11-230B22.1 | 1.32E-29 | 0.1224063 | 0.048 | 0.014 | 3.18E-25 | 1.3 | RP11-230B | 3.428571429 |
| POU2F31       | 1.94E-29 | 0.2215497 | 0.186 | 0.105 | 4.68E-25 | 1.3 | POU2F3    | 1.771428571 |
| ZNF1211       | 2.10E-29 | 0.1951033 | 0.121 | 0.058 | 5.05E-25 | 1.3 | ZNF121    | 2.086206897 |
| KIAA11471     | 2.58E-29 | 0.1924052 | 0.12  | 0.058 | 6.21E-25 | 1.3 | KIAA1147  | 2.068965517 |
| MYO3B2        | 2.58E-29 | 0.3802624 | 0.229 | 0.142 | 6.22E-25 | 1.3 | MYO3B     | 1.612676056 |
| MFSD6         | 2.58E-29 | 0.1984668 | 0.128 | 0.064 | 6.23E-25 | 1.3 | MFSD6     | 2           |
| TNIP3         | 2.95E-29 | 0.1566549 | 0.08  | 0.033 | 7.11E-25 | 1.3 | TNIP3     | 2.424242424 |
| RP11-356C4.52 | 3.08E-29 | 0.2593483 | 0.231 | 0.139 | 7.42E-25 | 1.3 | RP11-356C | 1.661870504 |
| PLEKHA5       | 3.24E-29 | 0.2340022 | 0.521 | 0.377 | 7.81E-25 | 1.3 | PLEKHA5   | 1.381962865 |
| LARP11        | 3.33E-29 | 0.2269299 | 0.215 | 0.128 | 8.02E-25 | 1.3 | LARP1     | 1.6796875   |
| ZFR1          | 3.36E-29 | 0.2684339 | 0.438 | 0.31  | 8.10E-25 | 1.3 | ZFR       | 1.412903226 |
| UQCRC22       | 3.78E-29 | 0.2170375 | 0.45  | 0.316 | 9.11E-25 | 1.3 | UQCRC2    | 1.424050633 |
| MRPL451       | 3.79E-29 | 0.1835153 | 0.231 | 0.137 | 9.14E-25 | 1.3 | MRPL45    | 1.686131387 |
| CLIC42        | 4.13E-29 | 0.3432868 | 0.678 | 0.547 | 9.95E-25 | 1.3 | CLIC4     | 1.239488117 |
| DRAM2         | 5.30E-29 | 0.2425555 | 0.313 | 0.205 | 1.28E-24 | 1.3 | DRAM2     | 1.526829268 |
| DNTTIP21      | 5.90E-29 | 0.2010943 | 0.257 | 0.159 | 1.42E-24 | 1.3 | DNTTIP2   | 1.616352201 |
| QDPR          | 7.91E-29 | 0.1680679 | 0.095 | 0.042 | 1.91E-24 | 1.3 | QDPR      | 2.261904762 |
| LPIN12        | 8.19E-29 | 0.1387248 | 0.306 | 0.194 | 1.98E-24 | 1.3 | LPIN1     | 1.577319588 |
| ADGRA31       | 8.74E-29 | 0.1921721 | 0.142 | 0.073 | 2.11E-24 | 1.3 | ADGRA3    | 1.945205479 |
| PPL1          | 9.45E-29 | 0.2212045 | 0.127 | 0.063 | 2.28E-24 | 1.3 | PPL       | 2.015873016 |
| SNW12         | 1.02E-28 | 0.2046258 | 0.305 | 0.195 | 2.46E-24 | 1.3 | SNW1      | 1.564102564 |
| EVA1A         | 1.13E-28 | 0.1106525 | 0.041 | 0.011 | 2.72E-24 | 1.3 | EVA1A     | 3.727272727 |
| PHF5A1        | 1.31E-28 | 0.1889648 | 0.242 | 0.146 | 3.16E-24 | 1.3 | PHF5A     | 1.657534247 |
| AC005042.41   | 1.32E-28 | 0.1870608 | 0.087 | 0.037 | 3.18E-24 | 1.3 | AC005042. | 2.351351351 |
| ZFYVE9        | 1.40E-28 | 0.2266789 | 0.143 | 0.075 | 3.38E-24 | 1.3 | ZFYVE9    | 1.906666667 |
| RP11-307P5.11 | 1.66E-28 | 0.153381  | 0.054 | 0.018 | 3.99E-24 | 1.3 | RP11-307P | 3           |
| CMTM81        | 2.19E-28 | 0.2591362 | 0.251 | 0.156 | 5.28E-24 | 1.3 | CMTM8     | 1.608974359 |
| PTRH21        | 2.68E-28 | 0.2218547 | 0.221 | 0.131 | 6.46E-24 | 1.3 | PTRH2     | 1.687022901 |
| VRK2          | 2.83E-28 | 0.216991  | 0.214 | 0.128 | 6.82E-24 | 1.3 | VRK2      | 1.671875    |
| THOC7         | 2.95E-28 | 0.1581555 | 0.138 | 0.071 | 7.12E-24 | 1.3 | THOC7     | 1.943661972 |
| ZNF6091       | 3.11E-28 | 0.2608953 | 0.609 | 0.477 | 7.49E-24 | 1.3 | ZNF609    | 1.27672956  |
| GSTP11        | 3.18E-28 | 0.3414794 | 0.107 | 0.051 | 7.66E-24 | 1.3 | GSTP1     | 2.098039216 |
| SCAPER1       | 3.21E-28 | 0.247453  | 0.244 | 0.151 | 7.75E-24 | 1.3 | SCAPER    | 1.61589404  |
| CHKA          | 3.42E-28 | 0.2600044 | 0.176 | 0.099 | 8.26E-24 | 1.3 | CHKA      | 1.777777778 |
| PDE7A         | 3.52E-28 | 0.294207  | 0.339 | 0.229 | 8.49E-24 | 1.3 | PDE7A     | 1.480349345 |
| RP4-765H13.11 | 3.96E-28 | 0.1141126 | 0.049 | 0.016 | 9.54E-24 | 1.3 | RP4-765H1 | 3.0625      |



|               |          |           |       |       |          |     |           |             |
|---------------|----------|-----------|-------|-------|----------|-----|-----------|-------------|
| PSMB2         | 4.82E-28 | 0.2145222 | 0.195 | 0.114 | 1.16E-23 | 1.3 | PSMB2     | 1.710526316 |
| CMTM72        | 5.45E-28 | 0.2357223 | 0.241 | 0.149 | 1.31E-23 | 1.3 | CMTM7     | 1.617449664 |
| TRPC11        | 5.77E-28 | 0.1671025 | 0.067 | 0.025 | 1.39E-23 | 1.3 | TRPC1     | 2.68        |
| GLTP1         | 5.85E-28 | 0.2223846 | 0.207 | 0.123 | 1.41E-23 | 1.3 | GLTP      | 1.682926829 |
| S100A7        | 6.30E-28 | 0.3327208 | 0.042 | 0.012 | 1.52E-23 | 1.3 | S100A7    | 3.5         |
| IL27RA1       | 7.05E-28 | 0.1129959 | 0.058 | 0.02  | 1.70E-23 | 1.3 | IL27RA    | 2.9         |
| EIF4A22       | 7.13E-28 | 0.2445063 | 0.788 | 0.686 | 1.72E-23 | 1.3 | EIF4A2    | 1.148688047 |
| TUBB1         | 8.23E-28 | 0.2756681 | 0.449 | 0.324 | 1.98E-23 | 1.3 | TUBB      | 1.385802469 |
| KCNN41        | 9.60E-28 | 0.1185918 | 0.042 | 0.012 | 2.32E-23 | 1.3 | KCNN4     | 3.5         |
| PSMB41        | 9.66E-28 | 0.2332705 | 0.185 | 0.106 | 2.33E-23 | 1.3 | PSMB4     | 1.745283019 |
| BCL11A        | 1.03E-27 | 0.1348176 | 0.072 | 0.028 | 2.48E-23 | 1.3 | BCL11A    | 2.571428571 |
| ALOX51        | 1.24E-27 | 0.2309887 | 0.179 | 0.102 | 2.99E-23 | 1.3 | ALOX5     | 1.754901961 |
| PXDN1         | 1.34E-27 | 0.2008795 | 0.157 | 0.086 | 3.24E-23 | 1.3 | PXDN      | 1.825581395 |
| CXCL5         | 1.73E-27 | 0.1102201 | 0.029 | 0.006 | 4.18E-23 | 1.3 | CXCL5     | 4.833333333 |
| DRG11         | 1.82E-27 | 0.2154897 | 0.264 | 0.167 | 4.40E-23 | 1.3 | DRG1      | 1.580838323 |
| B3GALT52      | 1.84E-27 | 0.1428847 | 0.063 | 0.023 | 4.44E-23 | 1.3 | B3GALT5   | 2.739130435 |
| LRIG3         | 2.20E-27 | 0.1450441 | 0.065 | 0.025 | 5.31E-23 | 1.3 | LRIG3     | 2.6         |
| RPL292        | 2.29E-27 | 0.6843686 | 0.329 | 0.226 | 5.52E-23 | 1.3 | RPL29     | 1.455752212 |
| PDXK          | 2.71E-27 | 0.2656262 | 0.182 | 0.105 | 6.54E-23 | 1.3 | PDXK      | 1.733333333 |
| DPYD-AS1      | 2.79E-27 | 0.2272911 | 0.134 | 0.069 | 6.73E-23 | 1.3 | DPYD-AS1  | 1.942028986 |
| CHD91         | 3.00E-27 | 0.2365342 | 0.524 | 0.388 | 7.23E-23 | 1.3 | CHD9      | 1.350515464 |
| RPS262        | 3.62E-27 | 0.1915012 | 0.186 | 0.108 | 8.73E-23 | 1.3 | RPS26     | 1.722222222 |
| NARS1         | 3.62E-27 | 0.2477102 | 0.358 | 0.245 | 8.73E-23 | 1.3 | NARS      | 1.46122449  |
| RFX7          | 3.65E-27 | 0.2422819 | 0.19  | 0.111 | 8.80E-23 | 1.3 | RFX7      | 1.711711712 |
| TEFM          | 3.82E-27 | 0.1650226 | 0.08  | 0.034 | 9.21E-23 | 1.3 | TEFM      | 2.352941176 |
| ZNF901        | 4.07E-27 | 0.2929184 | 0.137 | 0.073 | 9.82E-23 | 1.3 | ZNF90     | 1.876712329 |
| CASP4         | 4.29E-27 | 0.2345328 | 0.339 | 0.228 | 1.03E-22 | 1.3 | CASP4     | 1.486842105 |
| IRF21         | 4.55E-27 | 0.2484441 | 0.326 | 0.221 | 1.10E-22 | 1.3 | IRF2      | 1.475113122 |
| CAPZA11       | 5.13E-27 | 0.2440976 | 0.535 | 0.406 | 1.24E-22 | 1.3 | CAPZA1    | 1.31773399  |
| PPIL31        | 5.19E-27 | 0.1540733 | 0.141 | 0.074 | 1.25E-22 | 1.3 | PPIL3     | 1.905405405 |
| AC073283.4    | 5.54E-27 | 0.1495122 | 0.124 | 0.063 | 1.34E-22 | 1.3 | AC073283. | 1.968253968 |
| LRSAM1        | 5.70E-27 | 0.210567  | 0.155 | 0.085 | 1.37E-22 | 1.3 | LRSAM1    | 1.823529412 |
| LYPLAL1       | 5.73E-27 | 0.1686917 | 0.101 | 0.047 | 1.38E-22 | 1.3 | LYPLAL1   | 2.14893617  |
| ATP5C11       | 6.72E-27 | 0.2158125 | 0.392 | 0.272 | 1.62E-22 | 1.3 | ATP5C1    | 1.441176471 |
| RP11-290012.2 | 6.82E-27 | 0.2748439 | 0.118 | 0.059 | 1.64E-22 | 1.3 | RP11-2900 | 2           |
| SYCP3         | 7.34E-27 | 0.1353714 | 0.049 | 0.016 | 1.77E-22 | 1.3 | SYCP3     | 3.0625      |
| PGD           | 7.76E-27 | 0.1714038 | 0.1   | 0.046 | 1.87E-22 | 1.3 | PGD       | 2.173913043 |
| MITD1         | 8.06E-27 | 0.1934357 | 0.168 | 0.094 | 1.94E-22 | 1.3 | MITD1     | 1.787234043 |
| CXADR1        | 9.96E-27 | 0.2736068 | 0.264 | 0.17  | 2.40E-22 | 1.3 | CXADR     | 1.552941176 |
| MLH3          | 1.23E-26 | 0.1960358 | 0.128 | 0.066 | 2.97E-22 | 1.3 | MLH3      | 1.939393939 |
| NSF           | 1.35E-26 | 0.2758181 | 0.229 | 0.142 | 3.24E-22 | 1.3 | NSF       | 1.612676056 |
| TLR1          | 1.76E-26 | 0.1247846 | 0.068 | 0.027 | 4.25E-22 | 1.3 | TLR1      | 2.518518519 |
| HUWE11        | 2.39E-26 | 0.2731152 | 0.374 | 0.261 | 5.77E-22 | 1.3 | HUWE1     | 1.432950192 |
| SLC1A51       | 2.61E-26 | 0.1339302 | 0.072 | 0.029 | 6.29E-22 | 1.3 | SLC1A5    | 2.482758621 |
| TLDC1         | 2.79E-26 | 0.172743  | 0.16  | 0.088 | 6.72E-22 | 1.3 | TLDC1     | 1.818181818 |
| CTA-293F17.12 | 3.01E-26 | 0.1446838 | 0.127 | 0.065 | 7.26E-22 | 1.3 | CTA-293F1 | 1.953846154 |
| TTC9C         | 3.49E-26 | 0.1980111 | 0.191 | 0.112 | 8.42E-22 | 1.3 | TTC9C     | 1.705357143 |
| EHF1          | 3.71E-26 | 0.1967636 | 0.607 | 0.458 | 8.94E-22 | 1.3 | EHF       | 1.325327511 |
| LINC00998     | 3.84E-26 | 0.183338  | 0.204 | 0.121 | 9.27E-22 | 1.3 | LINC00998 | 1.685950413 |
| EIF2S12       | 4.84E-26 | 0.2202678 | 0.287 | 0.189 | 1.17E-21 | 1.3 | EIF2S1    | 1.518518519 |
| CSF1          | 4.91E-26 | 0.2191313 | 0.107 | 0.052 | 1.18E-21 | 1.3 | CSF1      | 2.057692308 |
| RPL92         | 5.28E-26 | 0.2792575 | 0.67  | 0.557 | 1.27E-21 | 1.3 | RPL9      | 1.202872531 |

|            |          |           |       |       |          |     |           |             |
|------------|----------|-----------|-------|-------|----------|-----|-----------|-------------|
| SET2       | 5.52E-26 | 0.2314765 | 0.524 | 0.396 | 1.33E-21 | 1.3 | SET       | 1.323232323 |
| CRYBG32    | 6.11E-26 | 0.1496607 | 0.091 | 0.041 | 1.47E-21 | 1.3 | CRYBG3    | 2.219512195 |
| EIF3D2     | 6.18E-26 | 0.2396578 | 0.435 | 0.315 | 1.49E-21 | 1.3 | EIF3D     | 1.380952381 |
| SLC6A9     | 6.91E-26 | 0.1076406 | 0.046 | 0.014 | 1.67E-21 | 1.3 | SLC6A9    | 3.285714286 |
| CX3CL1     | 7.14E-26 | 0.337906  | 0.326 | 0.221 | 1.72E-21 | 1.3 | CX3CL1    | 1.475113122 |
| ATP11A1    | 7.16E-26 | 0.2145243 | 0.108 | 0.053 | 1.73E-21 | 1.3 | ATP11A    | 2.037735849 |
| TTC7B1     | 9.00E-26 | 0.113623  | 0.057 | 0.021 | 2.17E-21 | 1.3 | TTC7B     | 2.714285714 |
| ZDHHC131   | 9.72E-26 | 0.1894072 | 0.136 | 0.072 | 2.34E-21 | 1.3 | ZDHHC13   | 1.888888889 |
| IK         | 9.99E-26 | 0.2292557 | 0.27  | 0.177 | 2.41E-21 | 1.3 | IK        | 1.525423729 |
| TAGLN1     | 1.07E-25 | 0.3269249 | 0.037 | 0.011 | 2.57E-21 | 1.3 | TAGLN     | 3.363636364 |
| FAAH2      | 1.20E-25 | 0.2714835 | 0.294 | 0.195 | 2.88E-21 | 1.3 | FAAH2     | 1.507692308 |
| MINA       | 1.22E-25 | 0.1286783 | 0.085 | 0.038 | 2.94E-21 | 1.3 | MINA      | 2.236842105 |
| TPI11      | 1.46E-25 | 0.2523912 | 0.467 | 0.347 | 3.52E-21 | 1.3 | TPI1      | 1.345821326 |
| LSS        | 1.74E-25 | 0.1539259 | 0.081 | 0.035 | 4.19E-21 | 1.3 | LSS       | 2.314285714 |
| GPHN       | 1.96E-25 | 0.2438833 | 0.333 | 0.227 | 4.73E-21 | 1.3 | GPHN      | 1.466960352 |
| TNFRSF82   | 2.21E-25 | 0.2623916 | 0.153 | 0.085 | 5.32E-21 | 1.3 | TNFRSF8   | 1.8         |
| PLSCR4     | 2.51E-25 | 0.1576373 | 0.098 | 0.046 | 6.05E-21 | 1.3 | PLSCR4    | 2.130434783 |
| SMARCA11   | 2.94E-25 | 0.1947485 | 0.177 | 0.103 | 7.10E-21 | 1.3 | SMARCA1   | 1.718446602 |
| NSD1       | 3.29E-25 | 0.1977686 | 0.198 | 0.118 | 7.93E-21 | 1.3 | NSD1      | 1.677966102 |
| ZNF37A     | 3.53E-25 | 0.1908583 | 0.117 | 0.059 | 8.51E-21 | 1.3 | ZNF37A    | 1.983050847 |
| HIST1H4E1  | 3.73E-25 | 0.1757807 | 0.14  | 0.075 | 9.00E-21 | 1.3 | HIST1H4E  | 1.866666667 |
| SOX5       | 3.91E-25 | 0.2025644 | 0.079 | 0.035 | 9.43E-21 | 1.3 | SOX5      | 2.257142857 |
| PUM32      | 4.57E-25 | 0.1744736 | 0.254 | 0.161 | 1.10E-20 | 1.3 | PUM3      | 1.577639752 |
| HNRNPH3    | 4.75E-25 | 0.1997539 | 0.42  | 0.302 | 1.15E-20 | 1.3 | HNRNPH3   | 1.390728477 |
| C4BPB      | 5.64E-25 | 0.1237182 | 0.051 | 0.018 | 1.36E-20 | 1.3 | C4BPB     | 2.833333333 |
| RUNX2      | 6.93E-25 | 0.1259527 | 0.055 | 0.02  | 1.67E-20 | 1.3 | RUNX2     | 2.75        |
| SHROOM41   | 6.95E-25 | 0.1292467 | 0.051 | 0.018 | 1.68E-20 | 1.3 | SHROOM4   | 2.833333333 |
| FAM171A1   | 7.30E-25 | 0.1836927 | 0.087 | 0.039 | 1.76E-20 | 1.3 | FAM171A1  | 2.230769231 |
| UBD1       | 7.90E-25 | 0.3229452 | 0.148 | 0.083 | 1.90E-20 | 1.3 | UBD       | 1.78313253  |
| GLS1       | 9.83E-25 | 0.2448561 | 0.286 | 0.189 | 2.37E-20 | 1.3 | GLS       | 1.513227513 |
| EIF2A2     | 1.02E-24 | 0.1737092 | 0.423 | 0.297 | 2.47E-20 | 1.3 | EIF2A     | 1.424242424 |
| RIN31      | 1.20E-24 | 0.1173584 | 0.054 | 0.019 | 2.90E-20 | 1.3 | RIN3      | 2.842105263 |
| SRSF51     | 1.34E-24 | 0.222334  | 0.408 | 0.292 | 3.22E-20 | 1.3 | SRSF5     | 1.397260274 |
| PML1       | 1.47E-24 | 0.169587  | 0.137 | 0.074 | 3.53E-20 | 1.3 | PML       | 1.851351351 |
| C21orf91   | 1.54E-24 | 0.1481044 | 0.081 | 0.036 | 3.72E-20 | 1.3 | C21orf91  | 2.25        |
| STAC2      | 1.58E-24 | 0.1510488 | 0.055 | 0.021 | 3.81E-20 | 1.3 | STAC2     | 2.619047619 |
| SSB        | 1.72E-24 | 0.1823069 | 0.221 | 0.136 | 4.14E-20 | 1.3 | SSB       | 1.625       |
| MTERF4     | 1.73E-24 | 0.1476732 | 0.109 | 0.054 | 4.18E-20 | 1.3 | MTERF4    | 2.018518519 |
| BMPR1A     | 1.96E-24 | 0.2567237 | 0.346 | 0.241 | 4.74E-20 | 1.3 | BMPR1A    | 1.435684647 |
| LARP7      | 2.00E-24 | 0.184687  | 0.231 | 0.145 | 4.81E-20 | 1.3 | LARP7     | 1.593103448 |
| PTCHD1-AS1 | 2.16E-24 | 0.2674932 | 0.143 | 0.079 | 5.22E-20 | 1.3 | PTCHD1-AS | 1.810126582 |
| DLD        | 2.58E-24 | 0.2252524 | 0.179 | 0.106 | 6.22E-20 | 1.3 | DLD       | 1.688679245 |
| USP441     | 2.64E-24 | 0.1126277 | 0.043 | 0.014 | 6.37E-20 | 1.3 | USP44     | 3.071428571 |
| EPRS       | 3.55E-24 | 0.1841139 | 0.215 | 0.132 | 8.56E-20 | 1.3 | EPRS      | 1.628787879 |
| RHPN21     | 4.19E-24 | 0.2278659 | 0.332 | 0.229 | 1.01E-19 | 1.3 | RHPN2     | 1.449781659 |
| LRRK11     | 4.28E-24 | 0.1384785 | 0.104 | 0.051 | 1.03E-19 | 1.3 | LRRK1     | 2.039215686 |
| MNAT11     | 4.69E-24 | 0.2303454 | 0.373 | 0.264 | 1.13E-19 | 1.3 | MNAT1     | 1.412878788 |
| ADH51      | 4.72E-24 | 0.1441196 | 0.143 | 0.078 | 1.14E-19 | 1.3 | ADH5      | 1.833333333 |
| GAB1       | 5.33E-24 | 0.348982  | 0.486 | 0.374 | 1.29E-19 | 1.3 | GAB1      | 1.299465241 |
| PTK71      | 6.01E-24 | 0.1718339 | 0.119 | 0.062 | 1.45E-19 | 1.3 | PTK7      | 1.919354839 |
| GXYLT2     | 6.26E-24 | 0.1745146 | 0.095 | 0.045 | 1.51E-19 | 1.3 | GXYLT2    | 2.111111111 |
| MIR646HG   | 7.16E-24 | 0.1786998 | 0.1   | 0.049 | 1.73E-19 | 1.3 | MIR646HG  | 2.040816327 |

|               |          |           |       |       |          |     |           |             |
|---------------|----------|-----------|-------|-------|----------|-----|-----------|-------------|
| STAMBP        | 9.05E-24 | 0.2110492 | 0.241 | 0.155 | 2.18E-19 | 1.3 | STAMBP    | 1.55483871  |
| TRNAU1AP1     | 9.56E-24 | 0.2094963 | 0.322 | 0.221 | 2.31E-19 | 1.3 | TRNAU1AP  | 1.457013575 |
| RPS27L        | 9.91E-24 | 0.1900883 | 0.633 | 0.503 | 2.39E-19 | 1.3 | RPS27L    | 1.258449304 |
| RPS112        | 1.02E-23 | 0.3355349 | 0.797 | 0.767 | 2.45E-19 | 1.3 | RPS11     | 1.039113429 |
| POMP1         | 1.02E-23 | 0.3028688 | 0.713 | 0.622 | 2.45E-19 | 1.3 | POMP      | 1.146302251 |
| LMO4          | 1.14E-23 | 0.1429734 | 0.139 | 0.076 | 2.75E-19 | 1.3 | LMO4      | 1.828947368 |
| GPAT32        | 1.17E-23 | 0.1636106 | 0.09  | 0.042 | 2.81E-19 | 1.3 | GPAT3     | 2.142857143 |
| HOTAIRM12     | 1.34E-23 | 0.1401382 | 0.071 | 0.03  | 3.24E-19 | 1.3 | HOTAIRM1  | 2.366666667 |
| TALDO11       | 1.54E-23 | 0.198147  | 0.123 | 0.065 | 3.70E-19 | 1.3 | TALDO1    | 1.892307692 |
| COX4I11       | 1.56E-23 | 0.2506808 | 0.818 | 0.769 | 3.75E-19 | 1.3 | COX4I1    | 1.063719116 |
| IDH3A         | 1.84E-23 | 0.181562  | 0.111 | 0.057 | 4.45E-19 | 1.3 | IDH3A     | 1.947368421 |
| FBXL4         | 1.87E-23 | 0.1802796 | 0.12  | 0.063 | 4.51E-19 | 1.3 | FBXL4     | 1.904761905 |
| ARL11         | 2.05E-23 | 0.2219514 | 0.343 | 0.239 | 4.94E-19 | 1.3 | ARL1      | 1.435146444 |
| GPRC5B1       | 2.19E-23 | 0.1168302 | 0.069 | 0.029 | 5.28E-19 | 1.3 | GPRC5B    | 2.379310345 |
| GNB2L11       | 2.34E-23 | 0.3027961 | 0.743 | 0.664 | 5.63E-19 | 1.3 | GNB2L1    | 1.118975904 |
| DOCK51        | 2.85E-23 | 0.2762051 | 0.292 | 0.199 | 6.88E-19 | 1.3 | DOCK5     | 1.467336683 |
| MRPS18B1      | 2.88E-23 | 0.1595072 | 0.183 | 0.109 | 6.95E-19 | 1.3 | MRPS18B   | 1.678899083 |
| ITGB4         | 3.69E-23 | 0.1850742 | 0.077 | 0.035 | 8.90E-19 | 1.3 | ITGB4     | 2.2         |
| FAM129A2      | 3.76E-23 | 0.1705536 | 0.374 | 0.261 | 9.07E-19 | 1.3 | FAM129A   | 1.432950192 |
| SLC25A25      | 4.26E-23 | 0.3512428 | 0.186 | 0.115 | 1.03E-18 | 1.3 | SLC25A25  | 1.617391304 |
| HNRNPA32      | 4.64E-23 | 0.2206686 | 0.357 | 0.252 | 1.12E-18 | 1.3 | HNRNPA3   | 1.416666667 |
| SLC1A3        | 5.37E-23 | 0.1176593 | 0.062 | 0.025 | 1.30E-18 | 1.3 | SLC1A3    | 2.48        |
| LITAF1        | 5.49E-23 | 0.2457016 | 0.548 | 0.425 | 1.32E-18 | 1.3 | LITAF     | 1.289411765 |
| KCNQ1         | 5.75E-23 | 0.1902726 | 0.111 | 0.057 | 1.39E-18 | 1.3 | KCNQ1     | 1.947368421 |
| HDAC71        | 6.65E-23 | 0.202602  | 0.158 | 0.091 | 1.60E-18 | 1.3 | HDAC7     | 1.736263736 |
| RP11-123O10.4 | 6.79E-23 | 0.2272752 | 0.299 | 0.203 | 1.64E-18 | 1.3 | RP11-123O | 1.472906404 |
| ERGIC2        | 6.92E-23 | 0.1899863 | 0.252 | 0.164 | 1.67E-18 | 1.3 | ERGIC2    | 1.536585366 |
| RHBDF21       | 7.97E-23 | 0.1942154 | 0.076 | 0.034 | 1.92E-18 | 1.3 | RHBDF2    | 2.235294118 |
| MT2A          | 8.14E-23 | 1.119828  | 0.105 | 0.055 | 1.96E-18 | 1.3 | MT2A      | 1.909090909 |
| MFSD14C1      | 9.45E-23 | 0.2351062 | 0.246 | 0.161 | 2.28E-18 | 1.3 | MFSD14C   | 1.527950311 |
| TMEM150C2     | 1.09E-22 | 0.1813358 | 0.292 | 0.197 | 2.64E-18 | 1.3 | TMEM150C  | 1.482233503 |
| SDCCAG8       | 1.25E-22 | 0.2190228 | 0.221 | 0.141 | 3.02E-18 | 1.3 | SDCCAG8   | 1.567375887 |
| MBOAT2        | 1.33E-22 | 0.1801333 | 0.147 | 0.083 | 3.21E-18 | 1.3 | MBOAT2    | 1.771084337 |
| LAMC21        | 1.36E-22 | 0.2562959 | 0.354 | 0.254 | 3.29E-18 | 1.3 | LAMC2     | 1.393700787 |
| SYPL11        | 1.37E-22 | 0.216699  | 0.478 | 0.359 | 3.29E-18 | 1.3 | SYPL1     | 1.331476323 |
| RNF170        | 1.37E-22 | 0.1357029 | 0.077 | 0.035 | 3.30E-18 | 1.3 | RNF170    | 2.2         |
| PRELID3B1     | 1.38E-22 | 0.1774147 | 0.332 | 0.229 | 3.33E-18 | 1.3 | PRELID3B  | 1.449781659 |
| PHKB          | 1.60E-22 | 0.2215868 | 0.246 | 0.16  | 3.86E-18 | 1.3 | PHKB      | 1.5375      |
| PYGB          | 1.68E-22 | 0.17224   | 0.072 | 0.031 | 4.05E-18 | 1.3 | PYGB      | 2.322580645 |
| BPTF          | 1.92E-22 | 0.2030809 | 0.444 | 0.324 | 4.62E-18 | 1.3 | BPTF      | 1.37037037  |
| CLCA42        | 1.97E-22 | 0.1129389 | 0.042 | 0.014 | 4.76E-18 | 1.3 | CLCA4     | 3           |
| LSM51         | 2.01E-22 | 0.1853377 | 0.454 | 0.334 | 4.85E-18 | 1.3 | LSM5      | 1.359281437 |
| GTF2B1        | 2.05E-22 | 0.1799474 | 0.249 | 0.162 | 4.93E-18 | 1.3 | GTF2B     | 1.537037037 |
| NCAM11        | 2.22E-22 | 0.1385458 | 0.049 | 0.018 | 5.35E-18 | 1.3 | NCAM1     | 2.722222222 |
| AMOTL12       | 2.79E-22 | 0.1449146 | 0.087 | 0.041 | 6.73E-18 | 1.3 | AMOTL1    | 2.12195122  |
| PPID          | 3.25E-22 | 0.1323006 | 0.112 | 0.059 | 7.85E-18 | 1.3 | PPID      | 1.898305085 |
| PHF14         | 3.76E-22 | 0.1932325 | 0.191 | 0.118 | 9.08E-18 | 1.3 | PHF14     | 1.618644068 |
| KALRN         | 4.11E-22 | 0.1813205 | 0.14  | 0.079 | 9.90E-18 | 1.3 | KALRN     | 1.772151899 |
| ELOVL6        | 4.22E-22 | 0.1284612 | 0.13  | 0.071 | 1.02E-17 | 1.3 | ELOVL6    | 1.830985915 |
| CATSPER2      | 4.42E-22 | 0.1562246 | 0.103 | 0.053 | 1.07E-17 | 1.3 | CATSPER2  | 1.943396226 |
| SAMD12        | 5.52E-22 | 0.2331359 | 0.341 | 0.24  | 1.33E-17 | 1.3 | SAMD12    | 1.420833333 |
| LAMB32        | 5.96E-22 | 0.1519801 | 0.332 | 0.229 | 1.44E-17 | 1.3 | LAMB3     | 1.449781659 |

|           |          |           |       |       |          |     |          |             |
|-----------|----------|-----------|-------|-------|----------|-----|----------|-------------|
| NDUFA41   | 7.10E-22 | 0.1805608 | 0.833 | 0.739 | 1.71E-17 | 1.3 | NDUFA4   | 1.127198917 |
| PSMC5     | 7.16E-22 | 0.1347043 | 0.156 | 0.09  | 1.73E-17 | 1.3 | PSMC5    | 1.733333333 |
| TUBA1A1   | 7.41E-22 | 0.1230583 | 0.349 | 0.244 | 1.79E-17 | 1.3 | TUBA1A   | 1.430327869 |
| HLA-B2    | 7.44E-22 | 0.2589223 | 0.647 | 0.53  | 1.79E-17 | 1.3 | HLA-B    | 1.220754717 |
| TNFAIP2   | 7.55E-22 | 0.271637  | 0.36  | 0.258 | 1.82E-17 | 1.3 | TNFAIP2  | 1.395348837 |
| INPP5B    | 7.56E-22 | 0.1304591 | 0.078 | 0.036 | 1.82E-17 | 1.3 | INPP5B   | 2.166666667 |
| HSPG21    | 7.61E-22 | 0.1945278 | 0.135 | 0.076 | 1.83E-17 | 1.3 | HSPG2    | 1.776315789 |
| LYRM11    | 7.88E-22 | 0.1458087 | 0.15  | 0.086 | 1.90E-17 | 1.3 | LYRM1    | 1.744186047 |
| DCTN61    | 8.35E-22 | 0.1873726 | 0.375 | 0.267 | 2.01E-17 | 1.3 | DCTN6    | 1.404494382 |
| HSD17B12  | 8.61E-22 | 0.2354813 | 0.292 | 0.2   | 2.08E-17 | 1.3 | HSD17B12 | 1.46        |
| KIAA1551  | 8.68E-22 | 0.1525379 | 0.192 | 0.118 | 2.09E-17 | 1.3 | KIAA1551 | 1.627118644 |
| FOXK22    | 9.14E-22 | 0.2140843 | 0.307 | 0.212 | 2.20E-17 | 1.3 | FOXK2    | 1.448113208 |
| HOMER2    | 9.39E-22 | 0.2454288 | 0.244 | 0.161 | 2.26E-17 | 1.3 | HOMER2   | 1.51552795  |
| C4orf19   | 9.48E-22 | 0.203968  | 0.215 | 0.137 | 2.28E-17 | 1.3 | C4orf19  | 1.569343066 |
| EML42     | 1.26E-21 | 0.2119793 | 0.24  | 0.157 | 3.04E-17 | 1.3 | EML4     | 1.52866242  |
| VDR       | 1.28E-21 | 0.1945593 | 0.135 | 0.076 | 3.09E-17 | 1.3 | VDR      | 1.776315789 |
| NMT1      | 1.33E-21 | 0.2004752 | 0.267 | 0.177 | 3.20E-17 | 1.3 | NMT1     | 1.508474576 |
| RHBDL2    | 1.52E-21 | 0.1379052 | 0.069 | 0.03  | 3.66E-17 | 1.3 | RHBDL2   | 2.3         |
| GBE12     | 1.62E-21 | 0.1903945 | 0.462 | 0.347 | 3.90E-17 | 1.3 | GBE1     | 1.331412104 |
| TAF71     | 1.64E-21 | 0.1653147 | 0.177 | 0.107 | 3.96E-17 | 1.3 | TAF7     | 1.654205607 |
| AP1B1     | 1.64E-21 | 0.1658576 | 0.056 | 0.023 | 3.96E-17 | 1.3 | AP1B1    | 2.434782609 |
| PSMA71    | 1.73E-21 | 0.1647541 | 0.235 | 0.153 | 4.16E-17 | 1.3 | PSMA7    | 1.535947712 |
| SNRPD3    | 1.73E-21 | 0.1995134 | 0.423 | 0.313 | 4.18E-17 | 1.3 | SNRPD3   | 1.3514377   |
| PDP11     | 1.82E-21 | 0.1446486 | 0.104 | 0.053 | 4.40E-17 | 1.3 | PDP1     | 1.962264151 |
| TNFRSF1B1 | 2.18E-21 | 0.1342766 | 0.072 | 0.032 | 5.25E-17 | 1.3 | TNFRSF1B | 2.25        |
| TTC91     | 2.27E-21 | 0.2236839 | 0.241 | 0.159 | 5.47E-17 | 1.3 | TTC9     | 1.51572327  |
| DFFA1     | 2.43E-21 | 0.1331301 | 0.084 | 0.04  | 5.86E-17 | 1.3 | DFFA     | 2.1         |
| TPRKB2    | 2.67E-21 | 0.1556832 | 0.234 | 0.15  | 6.43E-17 | 1.3 | TPRKB    | 1.56        |
| MRPL33    | 2.77E-21 | 0.2016407 | 0.53  | 0.409 | 6.68E-17 | 1.3 | MRPL33   | 1.295843521 |
| TFB1M     | 2.83E-21 | 0.1421508 | 0.098 | 0.05  | 6.81E-17 | 1.3 | TFB1M    | 1.96        |
| UBAP21    | 2.97E-21 | 0.2056978 | 0.228 | 0.148 | 7.15E-17 | 1.3 | UBAP2    | 1.540540541 |
| SUPT4H1   | 3.11E-21 | 0.1795045 | 0.358 | 0.254 | 7.49E-17 | 1.3 | SUPT4H1  | 1.409448819 |
| WWC1      | 3.14E-21 | 0.2498836 | 0.523 | 0.407 | 7.57E-17 | 1.3 | WWC1     | 1.285012285 |
| TLR5      | 3.16E-21 | 0.1159076 | 0.06  | 0.025 | 7.63E-17 | 1.3 | TLR5     | 2.4         |
| FOCAD     | 3.27E-21 | 0.2138477 | 0.238 | 0.156 | 7.89E-17 | 1.3 | FOCAD    | 1.525641026 |
| TMEM1592  | 3.47E-21 | 0.1591713 | 0.415 | 0.299 | 8.38E-17 | 1.3 | TMEM159  | 1.387959866 |
| C9orf3    | 3.72E-21 | 0.215273  | 0.207 | 0.13  | 8.98E-17 | 1.3 | C9orf3   | 1.592307692 |
| RPL222    | 3.90E-21 | 0.1292618 | 0.757 | 0.639 | 9.40E-17 | 1.3 | RPL22    | 1.184663537 |
| LSM6      | 3.96E-21 | 0.1020907 | 0.06  | 0.025 | 9.54E-17 | 1.3 | LSM6     | 2.4         |
| GTF2H5    | 4.32E-21 | 0.1696575 | 0.3   | 0.206 | 1.04E-16 | 1.3 | GTF2H5   | 1.45631068  |
| AFAP12    | 4.33E-21 | 0.1788261 | 0.14  | 0.081 | 1.04E-16 | 1.3 | AFAP1    | 1.728395062 |
| TCAF21    | 4.54E-21 | 0.1906092 | 0.156 | 0.093 | 1.09E-16 | 1.3 | TCAF2    | 1.677419355 |
| ESRRA     | 5.07E-21 | 0.138119  | 0.1   | 0.051 | 1.22E-16 | 1.3 | ESRRA    | 1.960784314 |
| LLPH      | 5.36E-21 | 0.1497958 | 0.191 | 0.118 | 1.29E-16 | 1.3 | LLPH     | 1.618644068 |
| CNTN4     | 5.37E-21 | 0.2355791 | 0.203 | 0.129 | 1.30E-16 | 1.3 | CNTN4    | 1.573643411 |
| MARCO     | 5.43E-21 | 0.1325833 | 0.088 | 0.043 | 1.31E-16 | 1.3 | MARCO    | 2.046511628 |
| NHSL21    | 5.56E-21 | 0.1841417 | 0.373 | 0.269 | 1.34E-16 | 1.3 | NHSL2    | 1.3866171   |
| PTBP22    | 5.79E-21 | 0.1917423 | 0.446 | 0.332 | 1.40E-16 | 1.3 | PTBP2    | 1.343373494 |
| CIAPIN1   | 5.84E-21 | 0.1470124 | 0.122 | 0.067 | 1.41E-16 | 1.3 | CIAPIN1  | 1.820895522 |
| MPDZ2     | 6.00E-21 | 0.1928601 | 0.207 | 0.131 | 1.45E-16 | 1.3 | MPDZ     | 1.580152672 |
| GATA61    | 6.49E-21 | 0.1476751 | 0.076 | 0.035 | 1.56E-16 | 1.3 | GATA6    | 2.171428571 |
| NR2F2     | 6.88E-21 | 0.1522123 | 0.134 | 0.076 | 1.66E-16 | 1.3 | NR2F2    | 1.763157895 |

|               |          |           |       |       |          |     |             |             |
|---------------|----------|-----------|-------|-------|----------|-----|-------------|-------------|
| SH3PXD2A1     | 7.07E-21 | 0.1820458 | 0.155 | 0.092 | 1.70E-16 | 1.3 | SH3PXD2A    | 1.684782609 |
| EPS151        | 7.21E-21 | 0.1987149 | 0.284 | 0.195 | 1.74E-16 | 1.3 | EPS15       | 1.456410256 |
| ACACA         | 8.15E-21 | 0.1820888 | 0.234 | 0.153 | 1.97E-16 | 1.3 | ACACA       | 1.529411765 |
| PAICS2        | 8.18E-21 | 0.1532687 | 0.225 | 0.145 | 1.97E-16 | 1.3 | PAICS       | 1.551724138 |
| FBL2          | 8.59E-21 | 0.1737979 | 0.2   | 0.127 | 2.07E-16 | 1.3 | FBL         | 1.57480315  |
| CD742         | 9.04E-21 | 0.1124463 | 0.141 | 0.081 | 2.18E-16 | 1.3 | CD74        | 1.740740741 |
| IGBP11        | 9.97E-21 | 0.2029215 | 0.498 | 0.384 | 2.40E-16 | 1.3 | IGBP1       | 1.296875    |
| DPF2          | 1.16E-20 | 0.1402627 | 0.136 | 0.077 | 2.80E-16 | 1.3 | DPF2        | 1.766233766 |
| MORF4L12      | 1.24E-20 | 0.2007013 | 0.721 | 0.62  | 3.00E-16 | 1.3 | MORF4L1     | 1.162903226 |
| ANTXR1        | 1.53E-20 | 0.1339036 | 0.07  | 0.031 | 3.70E-16 | 1.3 | ANTXR1      | 2.258064516 |
| MRPL50        | 1.54E-20 | 0.1312753 | 0.199 | 0.124 | 3.70E-16 | 1.3 | MRPL50      | 1.60483871  |
| XPO4          | 1.81E-20 | 0.1800682 | 0.173 | 0.106 | 4.37E-16 | 1.3 | XPO4        | 1.632075472 |
| DAP3          | 2.13E-20 | 0.170141  | 0.408 | 0.299 | 5.15E-16 | 1.3 | DAP3        | 1.364548495 |
| VGLL41        | 2.14E-20 | 0.2472795 | 0.304 | 0.214 | 5.15E-16 | 1.3 | VGLL4       | 1.420560748 |
| SNRNP35       | 2.26E-20 | 0.1490583 | 0.125 | 0.07  | 5.44E-16 | 1.3 | SNRNP35     | 1.785714286 |
| SHTN1         | 2.38E-20 | 0.1743234 | 0.195 | 0.122 | 5.74E-16 | 1.3 | SHTN1       | 1.598360656 |
| TNFRSF11A2    | 2.82E-20 | 0.1442928 | 0.113 | 0.061 | 6.79E-16 | 1.3 | TNFRSF11A   | 1.852459016 |
| FAXDC21       | 2.85E-20 | 0.1182878 | 0.055 | 0.022 | 6.87E-16 | 1.3 | FAXDC2      | 2.5         |
| ZNHIT3        | 3.01E-20 | 0.1843326 | 0.258 | 0.173 | 7.26E-16 | 1.3 | ZNHIT3      | 1.49132948  |
| MALL1         | 3.15E-20 | 0.1025824 | 0.031 | 0.009 | 7.59E-16 | 1.3 | MALL        | 3.444444444 |
| RGS61         | 3.29E-20 | 0.2195054 | 0.18  | 0.112 | 7.94E-16 | 1.3 | RGS6        | 1.607142857 |
| CLIP41        | 3.54E-20 | 0.1748766 | 0.279 | 0.191 | 8.54E-16 | 1.3 | CLIP4       | 1.460732984 |
| DEK1          | 3.56E-20 | 0.1490001 | 0.275 | 0.185 | 8.59E-16 | 1.3 | DEK         | 1.486486486 |
| HRSP12        | 4.13E-20 | 0.1159158 | 0.121 | 0.067 | 9.97E-16 | 1.3 | HRSP12      | 1.805970149 |
| PFDN52        | 4.16E-20 | 0.1469257 | 0.888 | 0.841 | 1.00E-15 | 1.3 | PFDN5       | 1.05588585  |
| ST132         | 4.27E-20 | 0.1727251 | 0.381 | 0.275 | 1.03E-15 | 1.3 | ST13        | 1.385454545 |
| HSPD12        | 4.50E-20 | 0.1400804 | 0.345 | 0.243 | 1.08E-15 | 1.3 | HSPD1       | 1.419753086 |
| NNT1          | 4.62E-20 | 0.1934938 | 0.107 | 0.057 | 1.11E-15 | 1.3 | NNT         | 1.877192982 |
| BACH11        | 4.71E-20 | 0.2167814 | 0.4   | 0.298 | 1.14E-15 | 1.3 | BACH1       | 1.342281879 |
| DISC1         | 4.93E-20 | 0.1802383 | 0.134 | 0.076 | 1.19E-15 | 1.3 | DISC1       | 1.763157895 |
| FLOT2         | 5.02E-20 | 0.112339  | 0.071 | 0.033 | 1.21E-15 | 1.3 | FLOT2       | 2.151515152 |
| EML51         | 5.05E-20 | 0.1772708 | 0.112 | 0.061 | 1.22E-15 | 1.3 | EML5        | 1.836065574 |
| SOAT11        | 5.21E-20 | 0.1222078 | 0.072 | 0.033 | 1.26E-15 | 1.3 | SOAT1       | 2.181818182 |
| STRBP         | 5.51E-20 | 0.2221197 | 0.223 | 0.148 | 1.33E-15 | 1.3 | STRBP       | 1.506756757 |
| KIAA0319L     | 6.23E-20 | 0.2383093 | 0.22  | 0.146 | 1.50E-15 | 1.3 | KIAA0319L   | 1.506849315 |
| CNTN3         | 6.32E-20 | 0.1383936 | 0.048 | 0.018 | 1.52E-15 | 1.3 | CNTN3       | 2.666666667 |
| NSMAF         | 6.60E-20 | 0.16385   | 0.122 | 0.068 | 1.59E-15 | 1.3 | NSMAF       | 1.794117647 |
| ZDHHC92       | 6.65E-20 | 0.1690493 | 0.144 | 0.085 | 1.60E-15 | 1.3 | ZDHHC9      | 1.694117647 |
| MRPL221       | 7.87E-20 | 0.2011837 | 0.296 | 0.207 | 1.90E-15 | 1.3 | MRPL22      | 1.429951691 |
| NFYB          | 7.98E-20 | 0.1371909 | 0.1   | 0.053 | 1.92E-15 | 1.3 | NFYB        | 1.886792453 |
| ATL2          | 8.00E-20 | 0.2301474 | 0.309 | 0.217 | 1.93E-15 | 1.3 | ATL2        | 1.423963134 |
| LOX2          | 9.77E-20 | 0.1092297 | 0.058 | 0.024 | 2.35E-15 | 1.3 | LOX         | 2.416666667 |
| HIBCH         | 9.83E-20 | 0.1433028 | 0.171 | 0.105 | 2.37E-15 | 1.3 | HIBCH       | 1.628571429 |
| MRPL27        | 1.16E-19 | 0.1461105 | 0.263 | 0.176 | 2.79E-15 | 1.3 | MRPL27      | 1.494318182 |
| C14orf1191    | 1.23E-19 | 0.1658047 | 0.28  | 0.191 | 2.97E-15 | 1.3 | C14orf119   | 1.465968586 |
| RP11-20I20.2  | 1.24E-19 | 0.110104  | 0.055 | 0.023 | 3.00E-15 | 1.3 | RP11-20I20C | 2.391304348 |
| NSUN4         | 1.34E-19 | 0.1504078 | 0.111 | 0.061 | 3.24E-15 | 1.3 | NSUN4       | 1.819672131 |
| ACTR6         | 1.37E-19 | 0.1448014 | 0.23  | 0.151 | 3.29E-15 | 1.3 | ACTR6       | 1.523178808 |
| MPZL12        | 1.38E-19 | 0.2157328 | 0.476 | 0.363 | 3.33E-15 | 1.3 | MPZL1       | 1.311294766 |
| LYRM2         | 1.41E-19 | 0.1320279 | 0.156 | 0.093 | 3.39E-15 | 1.3 | LYRM2       | 1.677419355 |
| COMMD10       | 1.43E-19 | 0.2244151 | 0.281 | 0.194 | 3.46E-15 | 1.3 | COMMD10     | 1.448453608 |
| RP11-382A20.5 | 1.47E-19 | 0.1415897 | 0.096 | 0.049 | 3.54E-15 | 1.3 | RP11-382A   | 1.959183673 |

|              |          |           |       |       |          |     |           |             |
|--------------|----------|-----------|-------|-------|----------|-----|-----------|-------------|
| MAGI2        | 1.55E-19 | 0.2297761 | 0.104 | 0.056 | 3.73E-15 | 1.3 | MAGI2     | 1.857142857 |
| SRFBP12      | 1.60E-19 | 0.1501784 | 0.218 | 0.141 | 3.85E-15 | 1.3 | SRFBP1    | 1.546099291 |
| RP11-711K1.8 | 1.60E-19 | 0.1836447 | 0.091 | 0.046 | 3.85E-15 | 1.3 | RP11-711K | 1.97826087  |
| RTP42        | 1.61E-19 | 0.1042529 | 0.081 | 0.039 | 3.88E-15 | 1.3 | RTP4      | 2.076923077 |
| RPL151       | 1.62E-19 | 0.3527286 | 0.806 | 0.775 | 3.90E-15 | 1.3 | RPL15     | 1.04        |
| DOPEY1       | 1.76E-19 | 0.1675737 | 0.135 | 0.078 | 4.25E-15 | 1.3 | DOPEY1    | 1.730769231 |
| SGCE         | 1.99E-19 | 0.1049446 | 0.079 | 0.038 | 4.79E-15 | 1.3 | SGCE      | 2.078947368 |
| SH3YL12      | 2.05E-19 | 0.1790424 | 0.283 | 0.195 | 4.95E-15 | 1.3 | SH3YL1    | 1.451282051 |
| CDK181       | 2.30E-19 | 0.1155496 | 0.043 | 0.016 | 5.55E-15 | 1.3 | CDK18     | 2.6875      |
| TJP22        | 2.66E-19 | 0.1882092 | 0.417 | 0.31  | 6.42E-15 | 1.3 | TJP2      | 1.34516129  |
| NAP1L12      | 2.86E-19 | 0.1936694 | 0.458 | 0.346 | 6.90E-15 | 1.3 | NAP1L1    | 1.323699422 |
| TIMM101      | 3.06E-19 | 0.1382844 | 0.275 | 0.187 | 7.39E-15 | 1.3 | TIMM10    | 1.470588235 |
| HAPLN31      | 3.11E-19 | 0.1151155 | 0.043 | 0.016 | 7.50E-15 | 1.3 | HAPLN3    | 2.6875      |
| DST          | 3.37E-19 | 0.1868634 | 0.669 | 0.556 | 8.13E-15 | 1.3 | DST       | 1.20323741  |
| NDUFAF42     | 3.52E-19 | 0.11011   | 0.124 | 0.07  | 8.49E-15 | 1.3 | NDUFAF4   | 1.771428571 |
| ATXN7        | 3.63E-19 | 0.1761778 | 0.166 | 0.103 | 8.75E-15 | 1.3 | ATXN7     | 1.611650485 |
| MRRF1        | 3.87E-19 | 0.1779959 | 0.196 | 0.126 | 9.33E-15 | 1.3 | MRRF      | 1.555555556 |
| NHSL12       | 3.93E-19 | 0.4149879 | 0.245 | 0.169 | 9.47E-15 | 1.3 | NHSL1     | 1.449704142 |
| RIF12        | 4.23E-19 | 0.2172996 | 0.306 | 0.216 | 1.02E-14 | 1.3 | RIF1      | 1.416666667 |
| ENOX2        | 4.56E-19 | 0.1600868 | 0.083 | 0.041 | 1.10E-14 | 1.3 | ENOX2     | 2.024390244 |
| PALLD1       | 5.09E-19 | 0.1721559 | 0.51  | 0.389 | 1.23E-14 | 1.3 | PALLD     | 1.311053985 |
| RAB30-AS1    | 5.16E-19 | 0.1320948 | 0.127 | 0.072 | 1.24E-14 | 1.3 | RAB30-AS1 | 1.763888889 |
| ATG7         | 5.21E-19 | 0.1943005 | 0.291 | 0.204 | 1.26E-14 | 1.3 | ATG7      | 1.426470588 |
| UBE2L31      | 5.41E-19 | 0.2101965 | 0.537 | 0.427 | 1.30E-14 | 1.3 | UBE2L3    | 1.257611241 |
| PTK2B1       | 5.66E-19 | 0.1544422 | 0.069 | 0.032 | 1.37E-14 | 1.3 | PTK2B     | 2.15625     |
| SOCS51       | 5.68E-19 | 0.2072656 | 0.194 | 0.126 | 1.37E-14 | 1.3 | SOCS5     | 1.53968254  |
| ADGRL21      | 7.37E-19 | 0.2018543 | 0.128 | 0.074 | 1.78E-14 | 1.3 | ADGRL2    | 1.72972973  |
| HMGN3        | 7.85E-19 | 0.1261891 | 0.181 | 0.113 | 1.89E-14 | 1.3 | HMGN3     | 1.601769912 |
| RRAGD2       | 8.97E-19 | 0.1406239 | 0.092 | 0.048 | 2.16E-14 | 1.3 | RRAGD     | 1.916666667 |
| SF3A3        | 9.08E-19 | 0.1357713 | 0.104 | 0.057 | 2.19E-14 | 1.3 | SF3A3     | 1.824561404 |
| LINC01122    | 9.53E-19 | 0.1477906 | 0.068 | 0.031 | 2.30E-14 | 1.3 | LINC01122 | 2.193548387 |
| CYP27A1      | 1.08E-18 | 0.1539152 | 0.103 | 0.056 | 2.60E-14 | 1.3 | CYP27A1   | 1.839285714 |
| UTP11L1      | 1.19E-18 | 0.1177438 | 0.115 | 0.064 | 2.88E-14 | 1.3 | UTP11L    | 1.796875    |
| PABPC12      | 1.24E-18 | 0.1783205 | 0.805 | 0.721 | 2.99E-14 | 1.3 | PABPC1    | 1.116504854 |
| TPTEP11      | 1.25E-18 | 0.1729397 | 0.225 | 0.149 | 3.02E-14 | 1.3 | TPTEP1    | 1.510067114 |
| FAM76A       | 1.30E-18 | 0.1116254 | 0.065 | 0.03  | 3.12E-14 | 1.3 | FAM76A    | 2.166666667 |
| NCK2         | 1.39E-18 | 0.1936459 | 0.202 | 0.131 | 3.35E-14 | 1.3 | NCK2      | 1.541984733 |
| KPNA21       | 1.45E-18 | 0.1487745 | 0.204 | 0.132 | 3.49E-14 | 1.3 | KPNA2     | 1.545454545 |
| ZNF429       | 1.48E-18 | 0.1387036 | 0.108 | 0.06  | 3.57E-14 | 1.3 | ZNF429    | 1.8         |
| VPS45        | 1.56E-18 | 0.1264208 | 0.127 | 0.073 | 3.77E-14 | 1.3 | VPS45     | 1.739726027 |
| PHAX1        | 1.62E-18 | 0.1252595 | 0.143 | 0.085 | 3.90E-14 | 1.3 | PHAX      | 1.682352941 |
| AC097724.32  | 1.66E-18 | 0.1133045 | 0.08  | 0.04  | 4.01E-14 | 1.3 | AC097724. | 2           |
| RPL33        | 1.67E-18 | 0.353368  | 0.386 | 0.295 | 4.04E-14 | 1.3 | RPL3      | 1.308474576 |
| LRAT1        | 1.76E-18 | 0.104271  | 0.051 | 0.021 | 4.24E-14 | 1.3 | LRAT      | 2.428571429 |
| PIK3C2G1     | 1.76E-18 | 0.1644285 | 0.108 | 0.059 | 4.25E-14 | 1.3 | PIK3C2G   | 1.830508475 |
| ATF7IP       | 1.85E-18 | 0.1833197 | 0.247 | 0.167 | 4.45E-14 | 1.3 | ATF7IP    | 1.479041916 |
| SGPL1        | 2.38E-18 | 0.1285033 | 0.166 | 0.103 | 5.73E-14 | 1.3 | SGPL1     | 1.611650485 |
| GRHL2        | 2.51E-18 | 0.2212262 | 0.373 | 0.273 | 6.04E-14 | 1.3 | GRHL2     | 1.366300366 |
| TRIAP1       | 2.78E-18 | 0.1334694 | 0.127 | 0.074 | 6.71E-14 | 1.3 | TRIAP1    | 1.716216216 |
| TMA16        | 2.89E-18 | 0.1034754 | 0.068 | 0.032 | 6.96E-14 | 1.3 | TMA16     | 2.125       |
| RABGAP1L     | 3.03E-18 | 0.2343391 | 0.306 | 0.22  | 7.30E-14 | 1.3 | RABGAP1L  | 1.390909091 |
| NUDCD11      | 3.12E-18 | 0.1305159 | 0.13  | 0.075 | 7.52E-14 | 1.3 | NUDCD1    | 1.733333333 |

|               |          |           |       |       |          |     |           |             |
|---------------|----------|-----------|-------|-------|----------|-----|-----------|-------------|
| SNRPG1        | 3.45E-18 | 0.2077052 | 0.613 | 0.507 | 8.33E-14 | 1.3 | SNRPG     | 1.209072978 |
| DDX1          | 3.55E-18 | 0.163596  | 0.148 | 0.09  | 8.56E-14 | 1.3 | DDX1      | 1.644444444 |
| SACS1         | 4.33E-18 | 0.1335603 | 0.1   | 0.054 | 1.04E-13 | 1.3 | SACS      | 1.851851852 |
| HLA-E1        | 4.56E-18 | 0.2203558 | 0.142 | 0.086 | 1.10E-13 | 1.3 | HLA-E     | 1.651162791 |
| ENTPD1-AS1    | 4.78E-18 | 0.1535142 | 0.091 | 0.048 | 1.15E-13 | 1.3 | ENTPD1-AS | 1.895833333 |
| PHF21A        | 4.79E-18 | 0.2121842 | 0.317 | 0.23  | 1.16E-13 | 1.3 | PHF21A    | 1.37826087  |
| GNPTAB        | 5.06E-18 | 0.1750402 | 0.147 | 0.089 | 1.22E-13 | 1.3 | GNPTAB    | 1.651685393 |
| MAP22         | 5.09E-18 | 0.1370714 | 0.15  | 0.091 | 1.23E-13 | 1.3 | MAP2      | 1.648351648 |
| CLEC2D        | 5.17E-18 | 0.1531952 | 0.133 | 0.079 | 1.25E-13 | 1.3 | CLEC2D    | 1.683544304 |
| VBP1          | 6.09E-18 | 0.1571529 | 0.206 | 0.135 | 1.47E-13 | 1.3 | VBP1      | 1.525925926 |
| SF3B62        | 6.40E-18 | 0.1815565 | 0.708 | 0.596 | 1.54E-13 | 1.3 | SF3B6     | 1.187919463 |
| ANXA7         | 6.90E-18 | 0.1732444 | 0.378 | 0.28  | 1.66E-13 | 1.3 | ANXA7     | 1.35        |
| TRMT10B       | 7.07E-18 | 0.1396637 | 0.136 | 0.081 | 1.70E-13 | 1.3 | TRMT10B   | 1.679012346 |
| GGACT1        | 7.57E-18 | 0.1460155 | 0.204 | 0.134 | 1.82E-13 | 1.3 | GGACT     | 1.52238806  |
| RAD50         | 8.70E-18 | 0.1769346 | 0.135 | 0.081 | 2.10E-13 | 1.3 | RAD50     | 1.666666667 |
| PROL12        | 8.77E-18 | 0.1316106 | 0.028 | 0.008 | 2.11E-13 | 1.3 | PROL1     | 3.5         |
| RPL36AL2      | 8.84E-18 | 0.1515961 | 0.914 | 0.883 | 2.13E-13 | 1.3 | RPL36AL   | 1.035107588 |
| SLC5A6        | 9.28E-18 | 0.1521793 | 0.144 | 0.087 | 2.24E-13 | 1.3 | SLC5A6    | 1.655172414 |
| SNRPD22       | 1.02E-17 | 0.154407  | 0.758 | 0.662 | 2.45E-13 | 1.3 | SNRPD2    | 1.145015106 |
| FAM189A21     | 1.06E-17 | 0.159772  | 0.112 | 0.063 | 2.57E-13 | 1.3 | FAM189A2  | 1.777777778 |
| CHORDC11      | 1.08E-17 | 0.1141759 | 0.127 | 0.074 | 2.60E-13 | 1.3 | CHORDC1   | 1.716216216 |
| ERCC6L2       | 1.08E-17 | 0.1497336 | 0.114 | 0.065 | 2.60E-13 | 1.3 | ERCC6L2   | 1.753846154 |
| FMNL21        | 1.09E-17 | 0.2004711 | 0.451 | 0.341 | 2.63E-13 | 1.3 | FMNL2     | 1.322580645 |
| CH17-189H20.1 | 1.14E-17 | 0.1707981 | 0.144 | 0.087 | 2.75E-13 | 1.3 | CH17-189H | 1.655172414 |
| CBR41         | 1.14E-17 | 0.1827156 | 0.314 | 0.226 | 2.75E-13 | 1.3 | CBR4      | 1.389380531 |
| ARHGEF10L2    | 1.16E-17 | 0.2487995 | 0.234 | 0.16  | 2.79E-13 | 1.3 | ARHGEF10I | 1.4625      |
| TRMT111       | 1.20E-17 | 0.1602231 | 0.153 | 0.094 | 2.89E-13 | 1.3 | TRMT11    | 1.627659574 |
| SP140L        | 1.26E-17 | 0.1303483 | 0.063 | 0.029 | 3.03E-13 | 1.3 | SP140L    | 2.172413793 |
| ARHGAP26-AS11 | 1.29E-17 | 0.1873118 | 0.21  | 0.14  | 3.12E-13 | 1.3 | ARHGAP26  | 1.5         |
| TBX192        | 1.32E-17 | 0.1418399 | 0.099 | 0.054 | 3.18E-13 | 1.3 | TBX19     | 1.833333333 |
| FAF2          | 1.34E-17 | 0.1522067 | 0.228 | 0.153 | 3.23E-13 | 1.3 | FAF2      | 1.490196078 |
| Sep-71        | 1.47E-17 | 0.1961027 | 0.468 | 0.363 | 3.54E-13 | 1.3 | Sep-07    | 1.289256198 |
| RPL181        | 1.51E-17 | 0.387055  | 0.139 | 0.086 | 3.64E-13 | 1.3 | RPL18     | 1.61627907  |
| NTRK21        | 1.71E-17 | 0.1358764 | 0.156 | 0.096 | 4.11E-13 | 1.3 | NTRK2     | 1.625       |
| RUSC22        | 1.75E-17 | 0.1128434 | 0.113 | 0.064 | 4.23E-13 | 1.3 | RUSC2     | 1.765625    |
| XPO52         | 1.80E-17 | 0.1435251 | 0.148 | 0.091 | 4.35E-13 | 1.3 | XPO5      | 1.626373626 |
| EEF2          | 1.83E-17 | 0.3910738 | 0.495 | 0.401 | 4.41E-13 | 1.3 | EEF2      | 1.234413965 |
| RPL36         | 1.89E-17 | 0.4838898 | 0.268 | 0.192 | 4.55E-13 | 1.3 | RPL36     | 1.395833333 |
| RPL392        | 1.95E-17 | 0.2259615 | 0.932 | 0.894 | 4.70E-13 | 1.3 | RPL39     | 1.042505593 |
| EIF2S21       | 1.96E-17 | 0.1827596 | 0.343 | 0.251 | 4.73E-13 | 1.3 | EIF2S2    | 1.366533865 |
| FRK1          | 2.03E-17 | 0.1614688 | 0.201 | 0.132 | 4.89E-13 | 1.3 | FRK       | 1.522727273 |
| DEGS11        | 2.13E-17 | 0.1269156 | 0.104 | 0.058 | 5.14E-13 | 1.3 | DEGS1     | 1.793103448 |
| ATXN3         | 2.20E-17 | 0.1743455 | 0.207 | 0.137 | 5.31E-13 | 1.3 | ATXN3     | 1.510948905 |
| TXNRD11       | 2.29E-17 | 0.55198   | 0.466 | 0.367 | 5.53E-13 | 1.3 | TXNRD1    | 1.269754768 |
| HDDC21        | 2.32E-17 | 0.1334194 | 0.106 | 0.059 | 5.59E-13 | 1.3 | HDDC2     | 1.796610169 |
| MPHOSPH8      | 2.39E-17 | 0.166578  | 0.214 | 0.142 | 5.75E-13 | 1.3 | MPHOSPH8  | 1.507042254 |
| WDR45B2       | 2.45E-17 | 0.2100223 | 0.29  | 0.208 | 5.90E-13 | 1.3 | WDR45B    | 1.394230769 |
| ABCB10        | 2.68E-17 | 0.1062378 | 0.064 | 0.03  | 6.46E-13 | 1.3 | ABCB10    | 2.133333333 |
| DCAF131       | 2.73E-17 | 0.1415256 | 0.125 | 0.073 | 6.58E-13 | 1.3 | DCAF13    | 1.712328767 |
| STEAP1        | 2.74E-17 | 0.1103637 | 0.091 | 0.049 | 6.62E-13 | 1.3 | STEAP1    | 1.857142857 |
| ITGBL12       | 2.79E-17 | 0.1290159 | 0.053 | 0.023 | 6.72E-13 | 1.3 | ITGBL1    | 2.304347826 |
| SERGEF        | 2.79E-17 | 0.11065   | 0.067 | 0.032 | 6.73E-13 | 1.3 | SERGEF    | 2.09375     |

|                |          |           |       |       |          |     |           |             |
|----------------|----------|-----------|-------|-------|----------|-----|-----------|-------------|
| CCDC91         | 3.00E-17 | 0.1613751 | 0.443 | 0.337 | 7.23E-13 | 1.3 | CCDC91    | 1.314540059 |
| IDH1           | 3.21E-17 | 0.1090929 | 0.13  | 0.076 | 7.74E-13 | 1.3 | IDH1      | 1.710526316 |
| DIRC2          | 3.26E-17 | 0.1591933 | 0.097 | 0.053 | 7.86E-13 | 1.3 | DIRC2     | 1.830188679 |
| TMPRSS31       | 3.56E-17 | 0.1170909 | 0.082 | 0.042 | 8.58E-13 | 1.3 | TMPRSS3   | 1.952380952 |
| NIN            | 3.86E-17 | 0.1622152 | 0.156 | 0.098 | 9.30E-13 | 1.3 | NIN       | 1.591836735 |
| LRP5           | 4.02E-17 | 0.1098305 | 0.055 | 0.025 | 9.69E-13 | 1.3 | LRP5      | 2.2         |
| RP11-111E14.12 | 4.08E-17 | 0.1119571 | 0.059 | 0.026 | 9.85E-13 | 1.3 | RP11-111E | 2.269230769 |
| NOL3           | 4.50E-17 | 0.1198839 | 0.078 | 0.04  | 1.08E-12 | 1.3 | NOL3      | 1.95        |
| IPO52          | 4.50E-17 | 0.1423317 | 0.162 | 0.101 | 1.09E-12 | 1.3 | IPO5      | 1.603960396 |
| EIF4B2         | 4.66E-17 | 0.1584594 | 0.477 | 0.37  | 1.12E-12 | 1.3 | EIF4B     | 1.289189189 |
| FAM49B1        | 4.81E-17 | 0.1607023 | 0.279 | 0.195 | 1.16E-12 | 1.3 | FAM49B    | 1.430769231 |
| ZFAND12        | 4.94E-17 | 0.1237912 | 0.255 | 0.175 | 1.19E-12 | 1.3 | ZFAND1    | 1.457142857 |
| LPL            | 5.27E-17 | 0.1006472 | 0.055 | 0.025 | 1.27E-12 | 1.3 | LPL       | 2.2         |
| GRIP1          | 5.73E-17 | 0.2316205 | 0.257 | 0.182 | 1.38E-12 | 1.3 | GRIP1     | 1.412087912 |
| CREG11         | 5.94E-17 | 0.1445195 | 0.089 | 0.048 | 1.43E-12 | 1.3 | CREG1     | 1.854166667 |
| RP11-577H5.5   | 6.67E-17 | 0.1024667 | 0.093 | 0.05  | 1.61E-12 | 1.3 | RP11-577H | 1.86        |
| ZNF721         | 7.18E-17 | 0.1906384 | 0.26  | 0.182 | 1.73E-12 | 1.3 | ZNF721    | 1.428571429 |
| COL27A1        | 7.42E-17 | 0.1504303 | 0.097 | 0.053 | 1.79E-12 | 1.3 | COL27A1   | 1.830188679 |
| SLC35E3        | 8.57E-17 | 0.1237847 | 0.125 | 0.074 | 2.07E-12 | 1.3 | SLC35E3   | 1.689189189 |
| TASP1          | 8.69E-17 | 0.1911733 | 0.189 | 0.124 | 2.10E-12 | 1.3 | TASP1     | 1.524193548 |
| CD552          | 8.79E-17 | 0.1397915 | 0.378 | 0.279 | 2.12E-12 | 1.3 | CD55      | 1.35483871  |
| CCDC90B        | 9.50E-17 | 0.1221176 | 0.135 | 0.082 | 2.29E-12 | 1.3 | CCDC90B   | 1.646341463 |
| MSN1           | 9.59E-17 | 0.1841516 | 0.524 | 0.408 | 2.31E-12 | 1.3 | MSN       | 1.284313725 |
| CCT6A1         | 9.87E-17 | 0.1180728 | 0.156 | 0.097 | 2.38E-12 | 1.3 | CCT6A     | 1.608247423 |
| ZC3H81         | 1.03E-16 | 0.1225938 | 0.114 | 0.066 | 2.49E-12 | 1.3 | ZC3H8     | 1.727272727 |
| BANF11         | 1.05E-16 | 0.1101183 | 0.252 | 0.173 | 2.54E-12 | 1.3 | BANF1     | 1.456647399 |
| SCAI           | 1.10E-16 | 0.1397347 | 0.106 | 0.06  | 2.66E-12 | 1.3 | SCAI      | 1.766666667 |
| TFAP2C1        | 1.14E-16 | 0.141631  | 0.13  | 0.078 | 2.74E-12 | 1.3 | TFAP2C    | 1.666666667 |
| BIRC6-AS21     | 1.22E-16 | 0.1845262 | 0.277 | 0.197 | 2.94E-12 | 1.3 | BIRC6-AS2 | 1.406091371 |
| RP11-541P9.31  | 1.25E-16 | 0.1438533 | 0.087 | 0.046 | 3.00E-12 | 1.3 | RP11-541P | 1.891304348 |
| CCNH           | 1.27E-16 | 0.1205974 | 0.131 | 0.079 | 3.07E-12 | 1.3 | CCNH      | 1.658227848 |
| ALG14          | 1.30E-16 | 0.1448443 | 0.127 | 0.075 | 3.12E-12 | 1.3 | ALG14     | 1.693333333 |
| IQGAP2         | 1.38E-16 | 0.1611942 | 0.082 | 0.043 | 3.33E-12 | 1.3 | IQGAP2    | 1.906976744 |
| FAM222B1       | 1.39E-16 | 0.1783441 | 0.281 | 0.201 | 3.36E-12 | 1.3 | FAM222B   | 1.39800995  |
| DAP1           | 1.41E-16 | 0.1287132 | 0.099 | 0.055 | 3.41E-12 | 1.3 | DAP       | 1.8         |
| NAA20          | 1.47E-16 | 0.1516789 | 0.172 | 0.111 | 3.54E-12 | 1.3 | NAA20     | 1.54954955  |
| PTPN4          | 1.47E-16 | 0.1656756 | 0.134 | 0.081 | 3.54E-12 | 1.3 | PTPN4     | 1.654320988 |
| EIF3J-AS1      | 1.48E-16 | 0.1182119 | 0.085 | 0.045 | 3.58E-12 | 1.3 | EIF3J-AS1 | 1.888888889 |
| BCAP29         | 1.50E-16 | 0.1743467 | 0.213 | 0.145 | 3.62E-12 | 1.3 | BCAP29    | 1.468965517 |
| LDLRAD4        | 1.56E-16 | 0.2265156 | 0.237 | 0.163 | 3.75E-12 | 1.3 | LDLRAD4   | 1.45398773  |
| MAGI11         | 1.60E-16 | 0.1686704 | 0.846 | 0.742 | 3.86E-12 | 1.3 | MAGI1     | 1.140161725 |
| NRBF2          | 1.67E-16 | 0.1204052 | 0.089 | 0.048 | 4.03E-12 | 1.3 | NRBF2     | 1.854166667 |
| CWC152         | 1.68E-16 | 0.1797324 | 0.367 | 0.275 | 4.05E-12 | 1.3 | CWC15     | 1.334545455 |
| AC090498.12    | 1.72E-16 | 0.1367148 | 0.399 | 0.296 | 4.16E-12 | 1.3 | AC090498. | 1.347972973 |
| GPM6B2         | 1.84E-16 | 0.1576209 | 0.182 | 0.118 | 4.43E-12 | 1.3 | GPM6B     | 1.542372881 |
| RPS161         | 1.85E-16 | 0.4694306 | 0.388 | 0.301 | 4.47E-12 | 1.3 | RPS16     | 1.289036545 |
| CARD162        | 1.86E-16 | 0.113583  | 0.08  | 0.041 | 4.48E-12 | 1.3 | CARD16    | 1.951219512 |
| TMEM167A       | 1.87E-16 | 0.177576  | 0.345 | 0.256 | 4.51E-12 | 1.3 | TMEM167A  | 1.34765625  |
| FBXO282        | 1.94E-16 | 0.1953315 | 0.215 | 0.147 | 4.68E-12 | 1.3 | FBXO28    | 1.462585034 |
| C9orf85        | 1.97E-16 | 0.1112932 | 0.108 | 0.062 | 4.75E-12 | 1.3 | C9orf85   | 1.741935484 |
| HADHA1         | 2.19E-16 | 0.1496479 | 0.368 | 0.273 | 5.28E-12 | 1.3 | HADHA     | 1.347985348 |
| LARS1          | 2.21E-16 | 0.1510845 | 0.267 | 0.189 | 5.32E-12 | 1.3 | LARS      | 1.412698413 |



|              |          |           |       |       |          |     |           |             |
|--------------|----------|-----------|-------|-------|----------|-----|-----------|-------------|
| XYLT11       | 2.29E-16 | 0.1036592 | 0.13  | 0.078 | 5.53E-12 | 1.3 | XYLT1     | 1.666666667 |
| ELK32        | 2.40E-16 | 0.1378938 | 0.171 | 0.11  | 5.79E-12 | 1.3 | ELK3      | 1.554545455 |
| CRBN2        | 2.64E-16 | 0.1565353 | 0.205 | 0.138 | 6.38E-12 | 1.3 | CRBN      | 1.485507246 |
| NCOA4        | 2.96E-16 | 0.1412515 | 0.207 | 0.138 | 7.14E-12 | 1.3 | NCOA4     | 1.5         |
| UBA3         | 3.21E-16 | 0.1653295 | 0.312 | 0.227 | 7.73E-12 | 1.3 | UBA3      | 1.374449339 |
| LINC013891   | 3.25E-16 | 0.1294892 | 0.042 | 0.017 | 7.83E-12 | 1.3 | LINC01389 | 2.470588235 |
| ITCH1        | 3.32E-16 | 0.1764829 | 0.42  | 0.316 | 8.01E-12 | 1.3 | ITCH      | 1.329113924 |
| COL19A1      | 3.59E-16 | 0.1383491 | 0.081 | 0.043 | 8.65E-12 | 1.3 | COL19A1   | 1.88372093  |
| RALGDS       | 3.63E-16 | 0.156774  | 0.088 | 0.047 | 8.76E-12 | 1.3 | RALGDS    | 1.872340426 |
| MRPS9        | 3.83E-16 | 0.1025406 | 0.094 | 0.052 | 9.23E-12 | 1.3 | MRPS9     | 1.807692308 |
| KCTD92       | 3.95E-16 | 0.2140177 | 0.306 | 0.225 | 9.53E-12 | 1.3 | KCTD9     | 1.36        |
| PTGFRN       | 4.09E-16 | 0.1419518 | 0.15  | 0.094 | 9.85E-12 | 1.3 | PTGFRN    | 1.595744681 |
| MED281       | 4.33E-16 | 0.1245634 | 0.127 | 0.077 | 1.04E-11 | 1.3 | MED28     | 1.649350649 |
| RBMX2        | 4.37E-16 | 0.1150566 | 0.142 | 0.088 | 1.05E-11 | 1.3 | RBMX2     | 1.613636364 |
| RP11-138A9.2 | 4.39E-16 | 0.1615968 | 0.169 | 0.109 | 1.06E-11 | 1.3 | RP11-138A | 1.550458716 |
| KIAA1143     | 4.61E-16 | 0.1244623 | 0.15  | 0.094 | 1.11E-11 | 1.3 | KIAA1143  | 1.595744681 |
| UST          | 4.93E-16 | 0.295602  | 0.248 | 0.178 | 1.19E-11 | 1.3 | UST       | 1.393258427 |
| PHYKPL       | 4.98E-16 | 0.139495  | 0.075 | 0.038 | 1.20E-11 | 1.3 | PHYKPL    | 1.973684211 |
| PWWP2A       | 5.08E-16 | 0.1404223 | 0.096 | 0.054 | 1.23E-11 | 1.3 | PWWP2A    | 1.777777778 |
| DDX501       | 5.45E-16 | 0.1475356 | 0.13  | 0.08  | 1.31E-11 | 1.3 | DDX50     | 1.625       |
| UGGT2        | 5.49E-16 | 0.1794405 | 0.208 | 0.14  | 1.32E-11 | 1.3 | UGGT2     | 1.485714286 |
| MAPK1IP1L1   | 5.74E-16 | 0.1536909 | 0.234 | 0.161 | 1.38E-11 | 1.3 | MAPK1IP1L | 1.453416149 |
| PAIP11       | 5.93E-16 | 0.1998411 | 0.218 | 0.15  | 1.43E-11 | 1.3 | PAIP1     | 1.453333333 |
| TMCC1        | 6.05E-16 | 0.1777025 | 0.333 | 0.244 | 1.46E-11 | 1.3 | TMCC1     | 1.364754098 |
| MBNL1        | 6.15E-16 | 0.2153557 | 0.504 | 0.397 | 1.48E-11 | 1.3 | MBNL1     | 1.269521411 |
| TAF4B        | 6.43E-16 | 0.1067993 | 0.089 | 0.048 | 1.55E-11 | 1.3 | TAF4B     | 1.854166667 |
| EIF2AK2      | 6.67E-16 | 0.1579753 | 0.137 | 0.085 | 1.61E-11 | 1.3 | EIF2AK2   | 1.611764706 |
| NRG3         | 7.35E-16 | 0.1466026 | 0.11  | 0.064 | 1.77E-11 | 1.3 | NRG3      | 1.71875     |
| ATG5         | 7.48E-16 | 0.1319847 | 0.163 | 0.104 | 1.80E-11 | 1.3 | ATG5      | 1.567307692 |
| ORMDL2       | 7.73E-16 | 0.1217806 | 0.226 | 0.154 | 1.86E-11 | 1.3 | ORMDL2    | 1.467532468 |
| NIFK2        | 8.03E-16 | 0.1143054 | 0.116 | 0.068 | 1.94E-11 | 1.3 | NIFK      | 1.705882353 |
| HMGB1        | 8.20E-16 | 0.1915911 | 0.63  | 0.535 | 1.98E-11 | 1.3 | HMGB1     | 1.177570093 |
| SPDYE51      | 1.12E-15 | 0.1237455 | 0.099 | 0.056 | 2.69E-11 | 1.3 | SPDYE5    | 1.767857143 |
| KRR12        | 1.18E-15 | 0.146034  | 0.214 | 0.146 | 2.84E-11 | 1.3 | KRR1      | 1.465753425 |
| SLC25A6      | 1.19E-15 | 0.2491332 | 0.166 | 0.109 | 2.88E-11 | 1.3 | SLC25A6   | 1.52293578  |
| COMT         | 1.28E-15 | 0.1246435 | 0.075 | 0.039 | 3.08E-11 | 1.3 | COMT      | 1.923076923 |
| CEP63        | 1.40E-15 | 0.149795  | 0.115 | 0.068 | 3.38E-11 | 1.3 | CEP63     | 1.691176471 |
| RPS15        | 1.46E-15 | 0.3722126 | 0.202 | 0.137 | 3.51E-11 | 1.3 | RPS15     | 1.474452555 |
| PRDX61       | 1.65E-15 | 0.1746016 | 0.238 | 0.166 | 3.99E-11 | 1.3 | PRDX6     | 1.43373494  |
| PXK          | 1.76E-15 | 0.1231751 | 0.087 | 0.047 | 4.25E-11 | 1.3 | PXK       | 1.85106383  |
| DANT2        | 1.85E-15 | 0.1446547 | 0.1   | 0.057 | 4.47E-11 | 1.3 | DANT2     | 1.754385965 |
| AK61         | 1.88E-15 | 0.125047  | 0.23  | 0.159 | 4.54E-11 | 1.3 | AK6       | 1.446540881 |
| EZH1         | 1.96E-15 | 0.1366885 | 0.129 | 0.079 | 4.72E-11 | 1.3 | EZH1      | 1.632911392 |
| FANCC        | 1.99E-15 | 0.1666861 | 0.185 | 0.123 | 4.80E-11 | 1.3 | FANCC     | 1.504065041 |
| MDM4         | 2.07E-15 | 0.1628183 | 0.325 | 0.24  | 4.99E-11 | 1.3 | MDM4      | 1.354166667 |
| C6orf89      | 2.09E-15 | 0.1268441 | 0.102 | 0.059 | 5.03E-11 | 1.3 | C6orf89   | 1.728813559 |
| SLC25A431    | 2.15E-15 | 0.1076646 | 0.068 | 0.034 | 5.18E-11 | 1.3 | SLC25A43  | 2           |
| MLLT10       | 2.35E-15 | 0.1594355 | 0.22  | 0.151 | 5.68E-11 | 1.3 | MLLT10    | 1.456953642 |
| AC023590.1   | 2.39E-15 | 0.1015273 | 0.055 | 0.026 | 5.77E-11 | 1.3 | AC023590. | 2.115384615 |
| ZNF426       | 2.45E-15 | 0.1191704 | 0.085 | 0.046 | 5.91E-11 | 1.3 | ZNF426    | 1.847826087 |
| PILRB        | 2.51E-15 | 0.1632166 | 0.081 | 0.043 | 6.05E-11 | 1.3 | PILRB     | 1.88372093  |
| KIN          | 2.51E-15 | 0.1176267 | 0.103 | 0.059 | 6.06E-11 | 1.3 | KIN       | 1.745762712 |

|            |          |           |       |       |          |     |           |             |
|------------|----------|-----------|-------|-------|----------|-----|-----------|-------------|
| ADPRM2     | 2.62E-15 | 0.1349531 | 0.103 | 0.059 | 6.31E-11 | 1.3 | ADPRM     | 1.745762712 |
| PHACTR42   | 2.75E-15 | 0.1480682 | 0.417 | 0.321 | 6.62E-11 | 1.3 | PHACTR4   | 1.299065421 |
| CDC5L2     | 2.76E-15 | 0.1387608 | 0.268 | 0.191 | 6.65E-11 | 1.3 | CDC5L     | 1.403141361 |
| SMOC1      | 2.80E-15 | 0.103247  | 0.06  | 0.029 | 6.76E-11 | 1.3 | SMOC1     | 2.068965517 |
| RPS281     | 2.88E-15 | 0.3763047 | 0.129 | 0.081 | 6.94E-11 | 1.3 | RPS28     | 1.592592593 |
| AUTS2      | 2.89E-15 | 0.2021902 | 0.628 | 0.517 | 6.98E-11 | 1.3 | AUTS2     | 1.214700193 |
| CCNB1IP12  | 2.90E-15 | 0.1354515 | 0.331 | 0.244 | 6.99E-11 | 1.3 | CCNB1IP1  | 1.356557377 |
| C14orf1661 | 2.95E-15 | 0.1068348 | 0.296 | 0.211 | 7.10E-11 | 1.3 | C14orf166 | 1.402843602 |
| CUL5       | 3.00E-15 | 0.1235184 | 0.174 | 0.114 | 7.23E-11 | 1.3 | CUL5      | 1.526315789 |
| MAT2A1     | 3.00E-15 | 0.1326788 | 0.087 | 0.047 | 7.23E-11 | 1.3 | MAT2A     | 1.85106383  |
| GREB1L2    | 3.21E-15 | 0.1298468 | 0.152 | 0.097 | 7.74E-11 | 1.3 | GREB1L    | 1.567010309 |
| CEBPD      | 3.37E-15 | 0.2057236 | 0.252 | 0.181 | 8.13E-11 | 1.3 | CEBPD     | 1.392265193 |
| CPAMD82    | 3.62E-15 | 0.1448077 | 0.104 | 0.06  | 8.73E-11 | 1.3 | CPAMD8    | 1.733333333 |
| OLMALINC   | 4.11E-15 | 0.1044452 | 0.077 | 0.04  | 9.91E-11 | 1.3 | OLMALINC  | 1.925       |
| GANC       | 4.16E-15 | 0.1344556 | 0.129 | 0.079 | 1.00E-10 | 1.3 | GANC      | 1.632911392 |
| RPL281     | 4.30E-15 | 0.6299473 | 0.148 | 0.098 | 1.04E-10 | 1.3 | RPL28     | 1.510204082 |
| KDM1B      | 4.44E-15 | 0.1111503 | 0.09  | 0.05  | 1.07E-10 | 1.3 | KDM1B     | 1.8         |
| IRX2       | 4.50E-15 | 0.1098359 | 0.102 | 0.059 | 1.09E-10 | 1.3 | IRX2      | 1.728813559 |
| PLA2G4A    | 4.53E-15 | 0.1091263 | 0.048 | 0.021 | 1.09E-10 | 1.3 | PLA2G4A   | 2.285714286 |
| PARVA      | 4.60E-15 | 0.1645291 | 0.176 | 0.117 | 1.11E-10 | 1.3 | PARVA     | 1.504273504 |
| LAMTOR51   | 4.88E-15 | 0.1534341 | 0.681 | 0.576 | 1.18E-10 | 1.3 | LAMTOR5   | 1.182291667 |
| ICA1       | 5.67E-15 | 0.1595195 | 0.351 | 0.26  | 1.37E-10 | 1.3 | ICA1      | 1.35        |
| CDC42SE2   | 6.01E-15 | 0.1943704 | 0.276 | 0.201 | 1.45E-10 | 1.3 | CDC42SE2  | 1.373134328 |
| FOS        | 6.37E-15 | 0.2883391 | 0.297 | 0.224 | 1.53E-10 | 1.3 | FOS       | 1.325892857 |
| TLK1       | 6.67E-15 | 0.1704116 | 0.263 | 0.187 | 1.61E-10 | 1.3 | TLK1      | 1.406417112 |
| STX71      | 6.77E-15 | 0.1486648 | 0.176 | 0.117 | 1.63E-10 | 1.3 | STX7      | 1.504273504 |
| GTF2F22    | 7.02E-15 | 0.1373217 | 0.153 | 0.099 | 1.69E-10 | 1.3 | GTF2F2    | 1.545454545 |
| VPS54      | 7.33E-15 | 0.1481475 | 0.254 | 0.181 | 1.77E-10 | 1.3 | VPS54     | 1.403314917 |
| CTTNBP2NL2 | 7.76E-15 | 0.1187046 | 0.283 | 0.202 | 1.87E-10 | 1.3 | CTTNBP2N  | 1.400990099 |
| ANP32E1    | 8.17E-15 | 0.1122113 | 0.128 | 0.079 | 1.97E-10 | 1.3 | ANP32E    | 1.620253165 |
| ZNF397     | 8.20E-15 | 0.1385293 | 0.141 | 0.089 | 1.98E-10 | 1.3 | ZNF397    | 1.584269663 |
| IL321      | 8.30E-15 | 0.1535447 | 0.091 | 0.051 | 2.00E-10 | 1.3 | IL32      | 1.784313725 |
| CCDC71L    | 8.70E-15 | 0.1015713 | 0.054 | 0.025 | 2.10E-10 | 1.3 | CCDC71L   | 2.16        |
| TPST1      | 9.50E-15 | 0.2197474 | 0.158 | 0.104 | 2.29E-10 | 1.3 | TPST1     | 1.519230769 |
| PRKDC      | 9.91E-15 | 0.135132  | 0.16  | 0.103 | 2.39E-10 | 1.3 | PRKDC     | 1.553398058 |
| DDX52      | 9.94E-15 | 0.1463278 | 0.151 | 0.098 | 2.40E-10 | 1.3 | DDX52     | 1.540816327 |
| INSIG1     | 1.01E-14 | 0.1203779 | 0.164 | 0.107 | 2.45E-10 | 1.3 | INSIG1    | 1.53271028  |
| TCP12      | 1.08E-14 | 0.1331537 | 0.231 | 0.161 | 2.60E-10 | 1.3 | TCP1      | 1.434782609 |
| ALDOA1     | 1.12E-14 | 0.2460757 | 0.153 | 0.1   | 2.70E-10 | 1.3 | ALDOA     | 1.53        |
| PLCG2      | 1.14E-14 | 0.1113383 | 0.086 | 0.048 | 2.75E-10 | 1.3 | PLCG2     | 1.791666667 |
| DLG2       | 1.14E-14 | 0.2391645 | 0.224 | 0.158 | 2.75E-10 | 1.3 | DLG2      | 1.417721519 |
| LINC00623  | 1.15E-14 | 0.1045685 | 0.055 | 0.026 | 2.76E-10 | 1.3 | LINC00623 | 2.115384615 |
| MGA        | 1.20E-14 | 0.1409423 | 0.107 | 0.063 | 2.90E-10 | 1.3 | MGA       | 1.698412698 |
| KRCC1      | 1.22E-14 | 0.1090138 | 0.093 | 0.052 | 2.95E-10 | 1.3 | KRCC1     | 1.788461538 |
| GSTA12     | 1.33E-14 | 0.1725039 | 0.072 | 0.038 | 3.20E-10 | 1.3 | GSTA1     | 1.894736842 |
| YEATS21    | 1.39E-14 | 0.1614643 | 0.168 | 0.111 | 3.34E-10 | 1.3 | YEATS2    | 1.513513514 |
| NUS12      | 1.40E-14 | 0.1026758 | 0.125 | 0.076 | 3.37E-10 | 1.3 | NUS1      | 1.644736842 |
| C9orf721   | 1.68E-14 | 0.1148768 | 0.093 | 0.053 | 4.05E-10 | 1.3 | C9orf72   | 1.754716981 |
| HNRNPA2B1  | 1.90E-14 | 0.2013211 | 0.502 | 0.403 | 4.58E-10 | 1.3 | HNRNPA2B  | 1.245657568 |
| PLEKHM3    | 1.90E-14 | 0.1255191 | 0.058 | 0.028 | 4.59E-10 | 1.3 | PLEKHM3   | 2.071428571 |
| KLHL20     | 1.93E-14 | 0.1435061 | 0.098 | 0.057 | 4.65E-10 | 1.3 | KLHL20    | 1.719298246 |
| PPP1CC     | 1.95E-14 | 0.1154338 | 0.142 | 0.09  | 4.70E-10 | 1.3 | PPP1CC    | 1.577777778 |

|               |          |           |       |       |          |     |           |             |
|---------------|----------|-----------|-------|-------|----------|-----|-----------|-------------|
| CDC42SE1      | 2.07E-14 | 0.1623489 | 0.207 | 0.143 | 4.99E-10 | 1.3 | CDC42SE1  | 1.447552448 |
| GOSR1         | 2.09E-14 | 0.134377  | 0.208 | 0.143 | 5.03E-10 | 1.3 | GOSR1     | 1.454545455 |
| MRPL20        | 2.16E-14 | 0.1252098 | 0.096 | 0.055 | 5.21E-10 | 1.3 | MRPL20    | 1.745454545 |
| ROR1          | 2.23E-14 | 0.1718353 | 0.048 | 0.022 | 5.37E-10 | 1.3 | ROR1      | 2.181818182 |
| FOXN21        | 2.24E-14 | 0.1430913 | 0.117 | 0.072 | 5.39E-10 | 1.3 | FOXN2     | 1.625       |
| NDUFA12       | 2.46E-14 | 0.1260364 | 0.281 | 0.204 | 5.94E-10 | 1.3 | NDUFA12   | 1.37745098  |
| DNAJC8        | 2.53E-14 | 0.1462505 | 0.29  | 0.213 | 6.10E-10 | 1.3 | DNAJC8    | 1.361502347 |
| GPX1          | 2.54E-14 | 0.1287403 | 0.064 | 0.032 | 6.11E-10 | 1.3 | GPX1      | 2           |
| IKZF2         | 2.70E-14 | 0.1138443 | 0.073 | 0.039 | 6.52E-10 | 1.3 | IKZF2     | 1.871794872 |
| RFC12         | 2.77E-14 | 0.1379225 | 0.266 | 0.19  | 6.68E-10 | 1.3 | RFC1      | 1.4         |
| THAP6         | 2.78E-14 | 0.1087947 | 0.091 | 0.051 | 6.70E-10 | 1.3 | THAP6     | 1.784313725 |
| DSG22         | 2.96E-14 | 0.1661331 | 0.338 | 0.256 | 7.13E-10 | 1.3 | DSG2      | 1.3203125   |
| RBMX          | 3.11E-14 | 0.1888641 | 0.259 | 0.187 | 7.49E-10 | 1.3 | RBMX      | 1.385026738 |
| DLEU1         | 3.17E-14 | 0.1367446 | 0.184 | 0.124 | 7.64E-10 | 1.3 | DLEU1     | 1.483870968 |
| PSMD7         | 3.64E-14 | 0.1365707 | 0.209 | 0.144 | 8.78E-10 | 1.3 | PSMD7     | 1.451388889 |
| SCFD2         | 3.65E-14 | 0.1135351 | 0.067 | 0.035 | 8.81E-10 | 1.3 | SCFD2     | 1.914285714 |
| PCNXL4        | 3.88E-14 | 0.1425165 | 0.155 | 0.101 | 9.35E-10 | 1.3 | PCNXL4    | 1.534653465 |
| LIMK2         | 3.90E-14 | 0.1390502 | 0.149 | 0.096 | 9.40E-10 | 1.3 | LIMK2     | 1.552083333 |
| TYW3          | 4.00E-14 | 0.1096729 | 0.096 | 0.056 | 9.64E-10 | 1.3 | TYW3      | 1.714285714 |
| N4BP2L2       | 4.00E-14 | 0.129352  | 0.825 | 0.714 | 9.65E-10 | 1.3 | N4BP2L2   | 1.155462185 |
| MFAP11        | 4.16E-14 | 0.1216825 | 0.208 | 0.143 | 1.00E-09 | 1.3 | MFAP1     | 1.454545455 |
| MLXIP1        | 4.49E-14 | 0.1442247 | 0.19  | 0.13  | 1.08E-09 | 1.3 | MLXIP     | 1.461538462 |
| RP11-304M2.31 | 4.82E-14 | 0.1156638 | 0.062 | 0.031 | 1.16E-09 | 1.3 | RP11-304M | 2           |
| HOOK2         | 5.08E-14 | 0.1566488 | 0.214 | 0.15  | 1.23E-09 | 1.3 | HOOK2     | 1.426666667 |
| OSMR-AS1      | 5.15E-14 | 0.1543203 | 0.233 | 0.165 | 1.24E-09 | 1.3 | OSMR-AS1  | 1.412121212 |
| ZBED5         | 5.23E-14 | 0.1334356 | 0.096 | 0.056 | 1.26E-09 | 1.3 | ZBED5     | 1.714285714 |
| ZNF544        | 5.53E-14 | 0.1440364 | 0.129 | 0.081 | 1.33E-09 | 1.3 | ZNF544    | 1.592592593 |
| CATSPERB      | 5.55E-14 | 0.1499272 | 0.27  | 0.197 | 1.34E-09 | 1.3 | CATSPERB  | 1.370558376 |
| CCNC1         | 5.57E-14 | 0.1450248 | 0.285 | 0.209 | 1.34E-09 | 1.3 | CCNC      | 1.363636364 |
| NUPL2         | 5.61E-14 | 0.1017976 | 0.09  | 0.051 | 1.35E-09 | 1.3 | NUPL2     | 1.764705882 |
| PSMB5         | 5.68E-14 | 0.1397674 | 0.315 | 0.233 | 1.37E-09 | 1.3 | PSMB5     | 1.35193133  |
| MRPS31        | 5.80E-14 | 0.1307823 | 0.145 | 0.094 | 1.40E-09 | 1.3 | MRPS31    | 1.542553191 |
| CD821         | 5.85E-14 | 0.1364813 | 0.085 | 0.048 | 1.41E-09 | 1.3 | CD82      | 1.770833333 |
| PARK7         | 6.03E-14 | 0.1627986 | 0.545 | 0.446 | 1.45E-09 | 1.3 | PARK7     | 1.221973094 |
| NHP21         | 6.16E-14 | 0.117495  | 0.042 | 0.018 | 1.48E-09 | 1.3 | NHP2      | 2.333333333 |
| ITPKB1        | 6.96E-14 | 0.1033396 | 0.074 | 0.04  | 1.68E-09 | 1.3 | ITPKB     | 1.85        |
| MLX           | 7.09E-14 | 0.1108227 | 0.089 | 0.051 | 1.71E-09 | 1.3 | MLX       | 1.745098039 |
| STARD13       | 8.48E-14 | 0.1039551 | 0.27  | 0.195 | 2.04E-09 | 1.3 | STARD13   | 1.384615385 |
| AKAP1         | 8.72E-14 | 0.101941  | 0.052 | 0.025 | 2.10E-09 | 1.3 | AKAP1     | 2.08        |
| PIN4          | 9.24E-14 | 0.1343955 | 0.342 | 0.259 | 2.23E-09 | 1.3 | PIN4      | 1.32046332  |
| THSD4-AS11    | 9.40E-14 | 0.1387524 | 0.553 | 0.447 | 2.27E-09 | 1.3 | THSD4-AS1 | 1.237136465 |
| KDM3B         | 9.62E-14 | 0.1714886 | 0.216 | 0.151 | 2.32E-09 | 1.3 | KDM3B     | 1.430463576 |
| PRKCI2        | 9.96E-14 | 0.1217136 | 0.244 | 0.173 | 2.40E-09 | 1.3 | PRKCI     | 1.410404624 |
| TGFBR21       | 1.03E-13 | 0.1114318 | 0.133 | 0.084 | 2.48E-09 | 1.3 | TGFBR2    | 1.583333333 |
| LETMD1        | 1.13E-13 | 0.1259684 | 0.098 | 0.058 | 2.73E-09 | 1.3 | LETMD1    | 1.689655172 |
| WDPCP         | 1.16E-13 | 0.1531977 | 0.171 | 0.115 | 2.81E-09 | 1.3 | WDPCP     | 1.486956522 |
| NEDD11        | 1.17E-13 | 0.1069164 | 0.093 | 0.054 | 2.82E-09 | 1.3 | NEDD1     | 1.722222222 |
| RABGAP1       | 1.18E-13 | 0.1649069 | 0.356 | 0.268 | 2.84E-09 | 1.3 | RABGAP1   | 1.328358209 |
| ATXN10        | 1.18E-13 | 0.1612123 | 0.201 | 0.141 | 2.85E-09 | 1.3 | ATXN10    | 1.425531915 |
| PDZD22        | 1.39E-13 | 0.1534791 | 0.555 | 0.463 | 3.35E-09 | 1.3 | PDZD2     | 1.198704104 |
| FRG11         | 1.41E-13 | 0.1345928 | 0.169 | 0.113 | 3.39E-09 | 1.3 | FRG1      | 1.495575221 |
| XRCC5         | 1.42E-13 | 0.1594637 | 0.44  | 0.346 | 3.41E-09 | 1.3 | XRCC5     | 1.271676301 |

|             |          |           |       |       |          |     |           |             |
|-------------|----------|-----------|-------|-------|----------|-----|-----------|-------------|
| PCID2       | 1.52E-13 | 0.1179952 | 0.137 | 0.088 | 3.66E-09 | 1.3 | PCID2     | 1.556818182 |
| TRAF3IP21   | 1.55E-13 | 0.1430809 | 0.177 | 0.12  | 3.74E-09 | 1.3 | TRAF3IP2  | 1.475       |
| BRCC3       | 1.61E-13 | 0.1193535 | 0.086 | 0.049 | 3.88E-09 | 1.3 | BRCC3     | 1.755102041 |
| PRKD31      | 1.62E-13 | 0.1370934 | 0.161 | 0.108 | 3.90E-09 | 1.3 | PRKD3     | 1.490740741 |
| HIP1        | 1.62E-13 | 0.1199519 | 0.137 | 0.088 | 3.91E-09 | 1.3 | HIP1      | 1.556818182 |
| FAS2        | 1.79E-13 | 0.1311216 | 0.144 | 0.094 | 4.33E-09 | 1.3 | FAS       | 1.531914894 |
| RNF1751     | 1.85E-13 | 0.1171135 | 0.056 | 0.028 | 4.47E-09 | 1.3 | RNF175    | 2           |
| GCC2        | 2.16E-13 | 0.1322198 | 0.387 | 0.297 | 5.20E-09 | 1.3 | GCC2      | 1.303030303 |
| TRAF11      | 2.16E-13 | 0.1232073 | 0.071 | 0.038 | 5.21E-09 | 1.3 | TRAF1     | 1.868421053 |
| CDC42EP11   | 2.19E-13 | 0.102631  | 0.063 | 0.032 | 5.29E-09 | 1.3 | CDC42EP1  | 1.96875     |
| RNF1501     | 2.24E-13 | 0.1642603 | 0.107 | 0.065 | 5.40E-09 | 1.3 | RNF150    | 1.646153846 |
| RPL13A1     | 2.33E-13 | 0.3875354 | 0.549 | 0.471 | 5.63E-09 | 1.3 | RPL13A    | 1.165605096 |
| LRIG1       | 2.49E-13 | 0.2213065 | 0.294 | 0.222 | 6.00E-09 | 1.3 | LRIG1     | 1.324324324 |
| GDI2        | 2.54E-13 | 0.1389378 | 0.257 | 0.185 | 6.12E-09 | 1.3 | GDI2      | 1.389189189 |
| SRSF122     | 2.60E-13 | 0.1125456 | 0.072 | 0.039 | 6.26E-09 | 1.3 | SRSF12    | 1.846153846 |
| MAN1A2      | 2.60E-13 | 0.1501168 | 0.222 | 0.157 | 6.26E-09 | 1.3 | MAN1A2    | 1.414012739 |
| DNTTIP11    | 2.69E-13 | 0.1108403 | 0.079 | 0.044 | 6.50E-09 | 1.3 | DNTTIP1   | 1.795454545 |
| PSMA5       | 2.98E-13 | 0.1382257 | 0.281 | 0.207 | 7.18E-09 | 1.3 | PSMA5     | 1.357487923 |
| PPM1L       | 3.01E-13 | 0.1327267 | 0.114 | 0.07  | 7.25E-09 | 1.3 | PPM1L     | 1.628571429 |
| USP161      | 3.03E-13 | 0.1503568 | 0.209 | 0.149 | 7.30E-09 | 1.3 | USP16     | 1.402684564 |
| ZNHIT6      | 3.30E-13 | 0.1463206 | 0.205 | 0.144 | 7.97E-09 | 1.3 | ZNHIT6    | 1.423611111 |
| RPL7L1      | 3.57E-13 | 0.1186117 | 0.173 | 0.117 | 8.62E-09 | 1.3 | RPL7L1    | 1.478632479 |
| MCFD21      | 3.58E-13 | 0.1006623 | 0.181 | 0.122 | 8.64E-09 | 1.3 | MCFD2     | 1.483606557 |
| TCEB2       | 3.60E-13 | 0.1756923 | 0.069 | 0.037 | 8.68E-09 | 1.3 | TCEB2     | 1.864864865 |
| TECPR2      | 3.68E-13 | 0.1055689 | 0.065 | 0.034 | 8.88E-09 | 1.3 | TECPR2    | 1.911764706 |
| RTTN        | 3.85E-13 | 0.1355993 | 0.107 | 0.065 | 9.29E-09 | 1.3 | RTTN      | 1.646153846 |
| MAGOH2      | 3.88E-13 | 0.1427935 | 0.212 | 0.149 | 9.34E-09 | 1.3 | MAGOH     | 1.422818792 |
| MRPL1       | 3.93E-13 | 0.1042795 | 0.097 | 0.057 | 9.47E-09 | 1.3 | MRPL1     | 1.701754386 |
| MT-ND1      | 4.15E-13 | 0.1589725 | 0.977 | 0.98  | 1.00E-08 | 1.3 | MT-ND1    | 0.996938776 |
| LIMS12      | 4.20E-13 | 0.1753699 | 0.312 | 0.236 | 1.01E-08 | 1.3 | LIMS1     | 1.322033898 |
| DBI1        | 4.28E-13 | 0.1054997 | 0.74  | 0.644 | 1.03E-08 | 1.3 | DBI       | 1.149068323 |
| TMEM63A     | 4.45E-13 | 0.1167851 | 0.094 | 0.056 | 1.07E-08 | 1.3 | TMEM63A   | 1.678571429 |
| CLCN3       | 4.58E-13 | 0.1471938 | 0.226 | 0.161 | 1.11E-08 | 1.3 | CLCN3     | 1.403726708 |
| NIF3L1      | 4.93E-13 | 0.1091777 | 0.091 | 0.054 | 1.19E-08 | 1.3 | NIF3L1    | 1.685185185 |
| ZDHHC17     | 5.05E-13 | 0.1451223 | 0.118 | 0.074 | 1.22E-08 | 1.3 | ZDHHC17   | 1.594594595 |
| NDRG22      | 5.40E-13 | 0.1240221 | 0.246 | 0.177 | 1.30E-08 | 1.3 | NDRG2     | 1.389830508 |
| SREBF2      | 5.80E-13 | 0.13269   | 0.465 | 0.368 | 1.40E-08 | 1.3 | SREBF2    | 1.263586957 |
| CEBPZ1      | 6.20E-13 | 0.1342187 | 0.207 | 0.146 | 1.50E-08 | 1.3 | CEBPZ     | 1.417808219 |
| CNIH1       | 6.51E-13 | 0.1327851 | 0.316 | 0.236 | 1.57E-08 | 1.3 | CNIH1     | 1.338983051 |
| PPP2R5C1    | 7.96E-13 | 0.1245953 | 0.231 | 0.165 | 1.92E-08 | 1.3 | PPP2R5C   | 1.4         |
| RPRD2       | 7.97E-13 | 0.1686607 | 0.203 | 0.143 | 1.92E-08 | 1.3 | RPRD2     | 1.41958042  |
| AC004231.21 | 8.13E-13 | 0.1242142 | 0.064 | 0.034 | 1.96E-08 | 1.3 | AC004231. | 1.882352941 |
| MRPS36      | 9.18E-13 | 0.1085867 | 0.236 | 0.169 | 2.21E-08 | 1.3 | MRPS36    | 1.396449704 |
| SIPA1L1     | 9.66E-13 | 0.1317135 | 0.471 | 0.375 | 2.33E-08 | 1.3 | SIPA1L1   | 1.256       |
| GBAS        | 9.66E-13 | 0.1453904 | 0.231 | 0.166 | 2.33E-08 | 1.3 | GBAS      | 1.391566265 |
| PDK31       | 1.06E-12 | 0.119966  | 0.295 | 0.221 | 2.56E-08 | 1.3 | PDK3      | 1.334841629 |
| CTDSP2      | 1.10E-12 | 0.1105261 | 0.234 | 0.168 | 2.65E-08 | 1.3 | CTDSP2    | 1.392857143 |
| TRAPPC11    | 1.14E-12 | 0.1095704 | 0.08  | 0.046 | 2.75E-08 | 1.3 | TRAPPC11  | 1.739130435 |
| STAG1       | 1.16E-12 | 0.1451216 | 0.605 | 0.502 | 2.79E-08 | 1.3 | STAG1     | 1.205179283 |
| CAPRIN1     | 1.24E-12 | 0.1375883 | 0.267 | 0.196 | 2.99E-08 | 1.3 | CAPRIN1   | 1.362244898 |
| TMEM45A     | 1.25E-12 | 0.1123241 | 0.186 | 0.129 | 3.01E-08 | 1.3 | TMEM45A   | 1.441860465 |
| ABCE12      | 1.26E-12 | 0.1213012 | 0.134 | 0.087 | 3.03E-08 | 1.3 | ABCE1     | 1.540229885 |

|             |          |           |       |       |          |     |            |             |
|-------------|----------|-----------|-------|-------|----------|-----|------------|-------------|
| SHFM1       | 1.29E-12 | 0.1445182 | 0.706 | 0.618 | 3.12E-08 | 1.3 | SHFM1      | 1.142394822 |
| MRPL47      | 1.58E-12 | 0.1281345 | 0.23  | 0.166 | 3.80E-08 | 1.3 | MRPL47     | 1.385542169 |
| EEF1D       | 1.61E-12 | 0.2009485 | 0.148 | 0.1   | 3.89E-08 | 1.3 | EEF1D      | 1.48        |
| COMMD61     | 1.65E-12 | 0.11787   | 0.439 | 0.346 | 3.97E-08 | 1.3 | COMMD6     | 1.268786127 |
| LGALS8      | 1.71E-12 | 0.1547121 | 0.159 | 0.108 | 4.13E-08 | 1.3 | LGALS8     | 1.472222222 |
| PRKRIP1     | 1.74E-12 | 0.1492321 | 0.17  | 0.117 | 4.19E-08 | 1.3 | PRKRIP1    | 1.452991453 |
| CCDC14      | 1.87E-12 | 0.142766  | 0.142 | 0.094 | 4.50E-08 | 1.3 | CCDC14     | 1.510638298 |
| TMEM242     | 2.11E-12 | 0.1046034 | 0.086 | 0.05  | 5.09E-08 | 1.3 | TMEM242    | 1.72        |
| PIK3IP1-AS1 | 2.16E-12 | 0.1026811 | 0.068 | 0.037 | 5.22E-08 | 1.3 | PIK3IP1-AS | 1.837837838 |
| UBE2E3      | 2.44E-12 | 0.1122145 | 0.23  | 0.165 | 5.89E-08 | 1.3 | UBE2E3     | 1.393939394 |
| CAV21       | 2.47E-12 | 0.1104966 | 0.072 | 0.04  | 5.96E-08 | 1.3 | CAV2       | 1.8         |
| TMEM41A2    | 2.61E-12 | 0.138515  | 0.191 | 0.134 | 6.29E-08 | 1.3 | TMEM41A    | 1.425373134 |
| GLMN        | 2.74E-12 | 0.1012175 | 0.079 | 0.045 | 6.61E-08 | 1.3 | GLMN       | 1.755555556 |
| POLR2F      | 2.82E-12 | 0.130181  | 0.091 | 0.054 | 6.81E-08 | 1.3 | POLR2F     | 1.685185185 |
| PRPF38B1    | 3.11E-12 | 0.141937  | 0.312 | 0.234 | 7.49E-08 | 1.3 | PRPF38B    | 1.333333333 |
| DNAJC51     | 3.21E-12 | 0.1276985 | 0.105 | 0.065 | 7.73E-08 | 1.3 | DNAJC5     | 1.615384615 |
| RPL35       | 3.31E-12 | 0.3637602 | 0.342 | 0.269 | 7.99E-08 | 1.3 | RPL35      | 1.271375465 |
| UBE2N1      | 3.32E-12 | 0.1216916 | 0.267 | 0.197 | 8.00E-08 | 1.3 | UBE2N      | 1.355329949 |
| GTF2IRD2    | 3.49E-12 | 0.1170569 | 0.117 | 0.074 | 8.43E-08 | 1.3 | GTF2IRD2   | 1.581081081 |
| DNAJC71     | 3.69E-12 | 0.152495  | 0.236 | 0.173 | 8.91E-08 | 1.3 | DNAJC7     | 1.36416185  |
| C1orf56     | 3.79E-12 | 0.1305971 | 0.197 | 0.14  | 9.15E-08 | 1.3 | C1orf56    | 1.407142857 |
| CASC4       | 3.86E-12 | 0.1541662 | 0.248 | 0.182 | 9.30E-08 | 1.3 | CASC4      | 1.362637363 |
| RFC3        | 4.01E-12 | 0.1077722 | 0.082 | 0.048 | 9.67E-08 | 1.3 | RFC3       | 1.708333333 |
| MMP241      | 4.22E-12 | 0.1163308 | 0.127 | 0.082 | 1.02E-07 | 1.3 | MMP24      | 1.548780488 |
| CTNNBL1     | 4.32E-12 | 0.109089  | 0.11  | 0.069 | 1.04E-07 | 1.3 | CTNNBL1    | 1.594202899 |
| AGK         | 4.45E-12 | 0.103957  | 0.058 | 0.03  | 1.07E-07 | 1.3 | AGK        | 1.933333333 |
| RRAS21      | 4.67E-12 | 0.1386882 | 0.309 | 0.232 | 1.12E-07 | 1.3 | RRAS2      | 1.331896552 |
| PSMC6       | 4.85E-12 | 0.1427938 | 0.39  | 0.307 | 1.17E-07 | 1.3 | PSMC6      | 1.270358306 |
| HERC2       | 4.89E-12 | 0.1372528 | 0.11  | 0.069 | 1.18E-07 | 1.3 | HERC2      | 1.594202899 |
| SLC25A13    | 4.92E-12 | 0.1378519 | 0.107 | 0.067 | 1.19E-07 | 1.3 | SLC25A13   | 1.597014925 |
| NONO2       | 5.34E-12 | 0.1124712 | 0.394 | 0.305 | 1.29E-07 | 1.3 | NONO       | 1.291803279 |
| EIF3H2      | 5.37E-12 | 0.1055364 | 0.704 | 0.616 | 1.30E-07 | 1.3 | EIF3H      | 1.142857143 |
| PUS10       | 5.70E-12 | 0.1014329 | 0.083 | 0.049 | 1.38E-07 | 1.3 | PUS10      | 1.693877551 |
| CDH31       | 6.08E-12 | 0.108492  | 0.172 | 0.118 | 1.47E-07 | 1.3 | CDH3       | 1.457627119 |
| BBOX1-AS1   | 6.41E-12 | 0.1081019 | 0.031 | 0.013 | 1.54E-07 | 1.3 | BBOX1-AS1  | 2.384615385 |
| SMURF22     | 6.48E-12 | 0.1835287 | 0.362 | 0.283 | 1.56E-07 | 1.3 | SMURF2     | 1.279151943 |
| CFDP1       | 6.95E-12 | 0.1207596 | 0.234 | 0.17  | 1.68E-07 | 1.3 | CFDP1      | 1.376470588 |
| SLC25A5     | 7.17E-12 | 0.1637599 | 0.195 | 0.139 | 1.73E-07 | 1.3 | SLC25A5    | 1.402877698 |
| SDAD1       | 7.23E-12 | 0.117717  | 0.11  | 0.07  | 1.74E-07 | 1.3 | SDAD1      | 1.571428571 |
| CALCOCO22   | 7.36E-12 | 0.1210885 | 0.319 | 0.244 | 1.77E-07 | 1.3 | CALCOCO2   | 1.307377049 |
| PIWIL4      | 7.40E-12 | 0.1011321 | 0.056 | 0.029 | 1.78E-07 | 1.3 | PIWIL4     | 1.931034483 |
| TFDP2       | 7.52E-12 | 0.1489244 | 0.264 | 0.197 | 1.81E-07 | 1.3 | TFDP2      | 1.340101523 |
| DCUN1D11    | 7.91E-12 | 0.1165133 | 0.173 | 0.12  | 1.91E-07 | 1.3 | DCUN1D1    | 1.441666667 |
| FRMD3       | 8.60E-12 | 0.1720993 | 0.125 | 0.082 | 2.07E-07 | 1.3 | FRMD3      | 1.524390244 |
| JKAMP       | 8.79E-12 | 0.1255712 | 0.129 | 0.085 | 2.12E-07 | 1.3 | JKAMP      | 1.517647059 |
| SNX29       | 9.09E-12 | 0.1578465 | 0.14  | 0.093 | 2.19E-07 | 1.3 | SNX29      | 1.505376344 |
| CYB5R3      | 9.25E-12 | 0.1184655 | 0.104 | 0.065 | 2.23E-07 | 1.3 | CYB5R3     | 1.6         |
| SRGAP3      | 9.38E-12 | 0.1071628 | 0.082 | 0.048 | 2.26E-07 | 1.3 | SRGAP3     | 1.708333333 |
| CAMKMT      | 9.89E-12 | 0.1662311 | 0.227 | 0.167 | 2.39E-07 | 1.3 | CAMKMT     | 1.359281437 |
| MAGOHB      | 1.00E-11 | 0.1016665 | 0.086 | 0.051 | 2.42E-07 | 1.3 | MAGOHB     | 1.68627451  |
| NCBP2       | 1.03E-11 | 0.1066875 | 0.143 | 0.096 | 2.48E-07 | 1.3 | NCBP2      | 1.489583333 |
| SFXN1       | 1.06E-11 | 0.1082282 | 0.082 | 0.048 | 2.55E-07 | 1.3 | SFXN1      | 1.708333333 |

|                |          |           |       |       |          |     |              |             |
|----------------|----------|-----------|-------|-------|----------|-----|--------------|-------------|
| COX7A22        | 1.06E-11 | 0.148594  | 0.809 | 0.757 | 2.56E-07 | 1.3 | COX7A2       | 1.068692206 |
| ANAPC161       | 1.07E-11 | 0.1296388 | 0.313 | 0.24  | 2.59E-07 | 1.3 | ANAPC16      | 1.304166667 |
| LGR41          | 1.11E-11 | 0.1319678 | 0.374 | 0.295 | 2.68E-07 | 1.3 | LGR4         | 1.26779661  |
| VPS351         | 1.24E-11 | 0.109954  | 0.33  | 0.252 | 2.99E-07 | 1.3 | VPS35        | 1.30952381  |
| AK1            | 1.31E-11 | 0.1023293 | 0.031 | 0.013 | 3.17E-07 | 1.3 | AK1          | 2.384615385 |
| ANKUB11        | 1.33E-11 | 0.1087991 | 0.167 | 0.115 | 3.20E-07 | 1.3 | ANKUB1       | 1.452173913 |
| MAVS           | 1.39E-11 | 0.1043843 | 0.081 | 0.048 | 3.34E-07 | 1.3 | MAVS         | 1.6875      |
| CCT71          | 1.42E-11 | 0.1196752 | 0.052 | 0.027 | 3.43E-07 | 1.3 | CCT7         | 1.925925926 |
| UXS11          | 1.60E-11 | 0.1327729 | 0.133 | 0.088 | 3.86E-07 | 1.3 | UXS1         | 1.511363636 |
| RP11-415J8.3   | 1.72E-11 | 0.1234969 | 0.081 | 0.048 | 4.16E-07 | 1.3 | RP11-415J8.3 | 1.6875      |
| ZNF595         | 1.99E-11 | 0.1172105 | 0.071 | 0.041 | 4.81E-07 | 1.3 | ZNF595       | 1.731707317 |
| TAX1BP11       | 2.19E-11 | 0.1577117 | 0.703 | 0.615 | 5.27E-07 | 1.3 | TAX1BP1      | 1.143089431 |
| SUMO12         | 2.27E-11 | 0.1264423 | 0.577 | 0.488 | 5.48E-07 | 1.3 | SUMO1        | 1.182377049 |
| SMARCAD1       | 2.39E-11 | 0.1096859 | 0.094 | 0.058 | 5.76E-07 | 1.3 | SMARCAD1     | 1.620689655 |
| SNX61          | 2.53E-11 | 0.1379029 | 0.391 | 0.309 | 6.11E-07 | 1.3 | SNX6         | 1.265372168 |
| AL592183.1     | 2.69E-11 | 0.1089651 | 0.101 | 0.063 | 6.49E-07 | 1.3 | AL592183.1   | 1.603174603 |
| IPMK1          | 2.78E-11 | 0.1128327 | 0.131 | 0.087 | 6.70E-07 | 1.3 | IPMK         | 1.505747126 |
| C11orf58       | 2.82E-11 | 0.1547169 | 0.345 | 0.27  | 6.81E-07 | 1.3 | C11orf58     | 1.277777778 |
| LRRC8B1        | 2.87E-11 | 0.1181786 | 0.148 | 0.101 | 6.92E-07 | 1.3 | LRRC8B       | 1.465346535 |
| PIBF1          | 2.93E-11 | 0.1675029 | 0.23  | 0.17  | 7.06E-07 | 1.3 | PIBF1        | 1.352941176 |
| NCOA1          | 3.01E-11 | 0.1606087 | 0.457 | 0.371 | 7.27E-07 | 1.3 | NCOA1        | 1.23180593  |
| RPL37A2        | 3.03E-11 | 0.1416353 | 0.973 | 0.975 | 7.31E-07 | 1.3 | RPL37A       | 0.997948718 |
| ZNF106         | 3.19E-11 | 0.1177462 | 0.148 | 0.101 | 7.69E-07 | 1.3 | ZNF106       | 1.465346535 |
| MICALL11       | 3.30E-11 | 0.1009127 | 0.075 | 0.044 | 7.95E-07 | 1.3 | MICALL1      | 1.704545455 |
| HDAC11         | 3.30E-11 | 0.107737  | 0.144 | 0.097 | 7.95E-07 | 1.3 | HDAC1        | 1.484536082 |
| PSMD1          | 3.31E-11 | 0.1340755 | 0.202 | 0.145 | 7.98E-07 | 1.3 | PSMD1        | 1.393103448 |
| WIPI1          | 3.31E-11 | 0.1234096 | 0.196 | 0.14  | 7.99E-07 | 1.3 | WIPI1        | 1.4         |
| TMTC2          | 3.40E-11 | 0.1788379 | 0.46  | 0.369 | 8.20E-07 | 1.3 | TMTC2        | 1.246612466 |
| ROR21          | 3.60E-11 | 0.164634  | 0.124 | 0.083 | 8.67E-07 | 1.3 | ROR2         | 1.493975904 |
| PRDX5          | 3.73E-11 | 0.151255  | 0.097 | 0.061 | 8.99E-07 | 1.3 | PRDX5        | 1.590163934 |
| RASGEF1A       | 3.82E-11 | 0.1124336 | 0.052 | 0.027 | 9.22E-07 | 1.3 | RASGEF1A     | 1.925925926 |
| PCNXL22        | 3.97E-11 | 0.3878781 | 0.814 | 0.758 | 9.58E-07 | 1.3 | PCNXL2       | 1.073878628 |
| ACSL1          | 4.18E-11 | 0.1272246 | 0.264 | 0.198 | 1.01E-06 | 1.3 | ACSL1        | 1.333333333 |
| TTC14          | 5.42E-11 | 0.1158663 | 0.107 | 0.069 | 1.31E-06 | 1.3 | TTC14        | 1.550724638 |
| VPS36          | 5.45E-11 | 0.1293452 | 0.145 | 0.099 | 1.32E-06 | 1.3 | VPS36        | 1.464646465 |
| IDE            | 5.61E-11 | 0.1178418 | 0.104 | 0.067 | 1.35E-06 | 1.3 | IDE          | 1.552238806 |
| RP11-795H16.32 | 5.90E-11 | 0.1838169 | 0.425 | 0.354 | 1.42E-06 | 1.3 | RP11-795H    | 1.200564972 |
| PCBP21         | 6.18E-11 | 0.1469802 | 0.65  | 0.562 | 1.49E-06 | 1.3 | PCBP2        | 1.15658363  |
| RP11-417F21.11 | 6.58E-11 | 0.1237927 | 0.136 | 0.092 | 1.59E-06 | 1.3 | RP11-417F    | 1.47826087  |
| H1FO           | 6.62E-11 | 0.1357    | 0.21  | 0.154 | 1.60E-06 | 1.3 | H1FO         | 1.363636364 |
| LYPLA1         | 7.10E-11 | 0.1201692 | 0.15  | 0.103 | 1.71E-06 | 1.3 | LYPLA1       | 1.45631068  |
| MACROD2        | 7.35E-11 | 0.1689097 | 0.303 | 0.236 | 1.77E-06 | 1.3 | MACROD2      | 1.283898305 |
| KIAA1217       | 7.70E-11 | 0.1794685 | 0.874 | 0.793 | 1.86E-06 | 1.3 | KIAA1217     | 1.102143758 |
| RPL8           | 7.74E-11 | 0.3649084 | 0.213 | 0.158 | 1.87E-06 | 1.3 | RPL8         | 1.348101266 |
| NKX3-12        | 8.23E-11 | 0.1048686 | 0.081 | 0.049 | 1.98E-06 | 1.3 | NKX3-1       | 1.653061224 |
| IMMP2L         | 8.66E-11 | 0.1892836 | 0.361 | 0.287 | 2.09E-06 | 1.3 | IMMP2L       | 1.257839721 |
| GHR1           | 9.03E-11 | 0.1057562 | 0.121 | 0.08  | 2.18E-06 | 1.3 | GHR          | 1.5125      |
| ERRFI11        | 9.31E-11 | 0.1415697 | 0.628 | 0.53  | 2.24E-06 | 1.3 | ERRFI1       | 1.18490566  |
| NUDCD3         | 9.57E-11 | 0.1376729 | 0.149 | 0.103 | 2.31E-06 | 1.3 | NUDCD3       | 1.446601942 |
| RBM41          | 9.87E-11 | 0.121404  | 0.108 | 0.07  | 2.38E-06 | 1.3 | RBM41        | 1.542857143 |
| C2orf68        | 9.99E-11 | 0.1008707 | 0.095 | 0.059 | 2.41E-06 | 1.3 | C2orf68      | 1.610169492 |
| CBWD1          | 1.01E-10 | 0.1053008 | 0.182 | 0.129 | 2.44E-06 | 1.3 | CBWD1        | 1.410852713 |

|                |          |           |       |       |             |     |           |             |
|----------------|----------|-----------|-------|-------|-------------|-----|-----------|-------------|
| WARS           | 1.09E-10 | 0.1121815 | 0.101 | 0.064 | 2.62E-06    | 1.3 | WARS      | 1.578125    |
| CD46           | 1.12E-10 | 0.2270901 | 0.476 | 0.394 | 2.70E-06    | 1.3 | CD46      | 1.208121827 |
| LRR37A3        | 1.33E-10 | 0.1150044 | 0.153 | 0.107 | 3.20E-06    | 1.3 | LRR37A3   | 1.429906542 |
| ADRBK21        | 1.39E-10 | 0.1007936 | 0.118 | 0.078 | 3.36E-06    | 1.3 | ADRBK2    | 1.512820513 |
| EPN2           | 1.41E-10 | 0.1359088 | 0.158 | 0.111 | 3.40E-06    | 1.3 | EPN2      | 1.423423423 |
| RPL26L1        | 1.46E-10 | 0.1064105 | 0.215 | 0.157 | 3.52E-06    | 1.3 | RPL26L1   | 1.369426752 |
| HEBP21         | 1.56E-10 | 0.105642  | 0.207 | 0.151 | 3.77E-06    | 1.3 | HEBP2     | 1.370860927 |
| FMO21          | 1.83E-10 | 0.1158866 | 0.089 | 0.055 | 4.42E-06    | 1.3 | FMO2      | 1.618181818 |
| PHB2           | 2.63E-10 | 0.1018835 | 0.13  | 0.087 | 6.33E-06    | 1.3 | PHB2      | 1.494252874 |
| USP28          | 3.00E-10 | 0.100297  | 0.062 | 0.035 | 7.24E-06    | 1.3 | USP28     | 1.771428571 |
| CHIC22         | 3.03E-10 | 0.1085681 | 0.21  | 0.155 | 7.31E-06    | 1.3 | CHIC2     | 1.35483871  |
| PPP1R12B       | 3.20E-10 | 0.1272059 | 0.281 | 0.213 | 7.73E-06    | 1.3 | PPP1R12B  | 1.319248826 |
| DIS3L2         | 3.29E-10 | 0.1217568 | 0.135 | 0.092 | 7.93E-06    | 1.3 | DIS3L2    | 1.467391304 |
| SS18           | 3.44E-10 | 0.1466755 | 0.183 | 0.133 | 8.30E-06    | 1.3 | SS18      | 1.37593985  |
| ZNF43          | 3.47E-10 | 0.1334133 | 0.178 | 0.128 | 8.37E-06    | 1.3 | ZNF43     | 1.390625    |
| C12orf57       | 3.96E-10 | 0.1211369 | 0.062 | 0.035 | 9.54E-06    | 1.3 | C12orf57  | 1.771428571 |
| KATNBL1        | 4.34E-10 | 0.1137195 | 0.189 | 0.138 | 1.05E-05    | 1.3 | KATNBL1   | 1.369565217 |
| EIF1B2         | 4.45E-10 | 0.1333817 | 0.282 | 0.217 | 1.07E-05    | 1.3 | EIF1B     | 1.299539171 |
| HS6ST3         | 4.67E-10 | 0.1237982 | 0.062 | 0.035 | 1.13E-05    | 1.3 | HS6ST3    | 1.771428571 |
| SNX3           | 4.78E-10 | 0.1169062 | 0.214 | 0.159 | 1.15E-05    | 1.3 | SNX3      | 1.34591195  |
| PPFIBP12       | 5.10E-10 | 0.1139143 | 0.194 | 0.141 | 1.23E-05    | 1.3 | PPFIBP1   | 1.375886525 |
| RNF213         | 5.24E-10 | 0.1372944 | 0.233 | 0.175 | 1.26E-05    | 1.3 | RNF213    | 1.331428571 |
| RSRC1          | 5.40E-10 | 0.1261895 | 0.354 | 0.279 | 1.30E-05    | 1.3 | RSRC1     | 1.268817204 |
| PHC3           | 5.40E-10 | 0.1242258 | 0.222 | 0.164 | 1.30E-05    | 1.3 | PHC3      | 1.353658537 |
| TNPO11         | 6.00E-10 | 0.1082551 | 0.258 | 0.196 | 1.45E-05    | 1.3 | TNPO1     | 1.316326531 |
| NBR1           | 6.51E-10 | 0.1154281 | 0.225 | 0.168 | 1.57E-05    | 1.3 | NBR1      | 1.339285714 |
| SPNS2          | 7.27E-10 | 0.1267962 | 0.081 | 0.05  | 1.75E-05    | 1.3 | SPNS2     | 1.62        |
| MARK1          | 7.75E-10 | 0.1071942 | 0.095 | 0.062 | 1.87E-05    | 1.3 | MARK1     | 1.532258065 |
| KDM7A2         | 7.86E-10 | 0.1275791 | 0.341 | 0.267 | 1.90E-05    | 1.3 | KDM7A     | 1.277153558 |
| ARL6IP5        | 8.87E-10 | 0.109829  | 0.568 | 0.48  | 2.14E-05    | 1.3 | ARL6IP5   | 1.183333333 |
| IDH2           | 9.17E-10 | 0.1171626 | 0.112 | 0.075 | 2.21E-05    | 1.3 | IDH2      | 1.493333333 |
| RP11-452H21.11 | 1.04E-09 | 0.105625  | 0.101 | 0.066 | 2.51E-05    | 1.3 | RP11-452H | 1.53030303  |
| RPL27A         | 1.11E-09 | 0.3050422 | 0.493 | 0.416 | 2.67E-05    | 1.3 | RPL27A    | 1.185096154 |
| KCND21         | 1.34E-09 | 0.1305928 | 0.087 | 0.055 | 3.23E-05    | 1.3 | KCND2     | 1.581818182 |
| EAPP           | 1.34E-09 | 0.1013802 | 0.344 | 0.272 | 3.24E-05    | 1.3 | EAPP      | 1.264705882 |
| MSH3           | 1.47E-09 | 0.1407347 | 0.138 | 0.097 | 3.55E-05    | 1.3 | MSH3      | 1.422680412 |
| CADM1          | 1.49E-09 | 0.1208609 | 0.107 | 0.072 | 3.59E-05    | 1.3 | CADM1     | 1.486111111 |
| GPATCH8        | 1.54E-09 | 0.1172306 | 0.306 | 0.239 | 3.72E-05    | 1.3 | GPATCH8   | 1.280334728 |
| GNAQ           | 1.54E-09 | 0.1425081 | 0.375 | 0.304 | 3.72E-05    | 1.3 | GNAQ      | 1.233552632 |
| TCEB11         | 1.75E-09 | 0.1092853 | 0.375 | 0.3   | 4.22E-05    | 1.3 | TCEB1     | 1.25        |
| ZNF98          | 1.83E-09 | 0.1044906 | 0.13  | 0.09  | 4.41E-05    | 1.3 | ZNF98     | 1.444444444 |
| MVP            | 2.14E-09 | 0.1064747 | 0.092 | 0.059 | 5.17E-05    | 1.3 | MVP       | 1.559322034 |
| RFWD2          | 2.16E-09 | 0.13856   | 0.368 | 0.294 | 5.21E-05    | 1.3 | RFWD2     | 1.25170068  |
| NARS2          | 2.49E-09 | 0.1058217 | 0.099 | 0.065 | 6.01E-05    | 1.3 | NARS2     | 1.523076923 |
| SEC22A         | 3.04E-09 | 0.1172733 | 0.16  | 0.116 | 7.34E-05    | 1.3 | SEC22A    | 1.379310345 |
| SLC25A26       | 3.12E-09 | 0.1010124 | 0.119 | 0.081 | 7.52E-05    | 1.3 | SLC25A26  | 1.469135802 |
| KDSR           | 3.47E-09 | 0.1015894 | 0.141 | 0.099 | 8.36E-05    | 1.3 | KDSR      | 1.424242424 |
| LNPEP          | 3.88E-09 | 0.1000966 | 0.125 | 0.086 | 9.36E-05    | 1.3 | LNPEP     | 1.453488372 |
| MYH141         | 4.33E-09 | 0.115871  | 0.207 | 0.156 | 0.000104341 | 1.3 | MYH14     | 1.326923077 |
| STX17          | 5.66E-09 | 0.1152094 | 0.159 | 0.115 | 0.000136365 | 1.3 | STX17     | 1.382608696 |
| TSFM           | 6.06E-09 | 0.1020751 | 0.069 | 0.042 | 0.000146123 | 1.3 | TSFM      | 1.642857143 |
| RP4-533D7.51   | 6.12E-09 | 0.1258064 | 0.042 | 0.022 | 0.000147589 | 1.3 | RP4-533D7 | 1.909090909 |

|                |          |           |       |       |             |     |            |             |
|----------------|----------|-----------|-------|-------|-------------|-----|------------|-------------|
| RERG           | 6.15E-09 | 0.1321188 | 0.248 | 0.192 | 0.000148228 | 1.3 | RERG       | 1.291666667 |
| AP000487.62    | 6.37E-09 | 0.1330614 | 0.211 | 0.159 | 0.000153578 | 1.3 | AP000487.1 | 1.327044025 |
| PRKAG1         | 7.04E-09 | 0.1086812 | 0.183 | 0.136 | 0.000169816 | 1.3 | PRKAG1     | 1.345588235 |
| RAPGEF11       | 8.18E-09 | 0.107088  | 0.139 | 0.098 | 0.000197333 | 1.3 | RAPGEF1    | 1.418367347 |
| SEL1L2         | 9.34E-09 | 0.1235136 | 0.024 | 0.01  | 0.000225263 | 1.3 | SEL1L2     | 2.4         |
| SH3PXD2B1      | 1.04E-08 | 0.1102683 | 0.162 | 0.118 | 0.000249909 | 1.3 | SH3PXD2B   | 1.372881356 |
| PTAR1          | 1.05E-08 | 0.1018947 | 0.102 | 0.069 | 0.000253556 | 1.3 | PTAR1      | 1.47826087  |
| RPS181         | 1.06E-08 | 0.2010071 | 0.703 | 0.628 | 0.000254535 | 1.3 | RPS18      | 1.119426752 |
| ZNF235         | 1.06E-08 | 0.1218448 | 0.107 | 0.073 | 0.000255663 | 1.3 | ZNF235     | 1.465753425 |
| PITPNA         | 1.09E-08 | 0.1255017 | 0.178 | 0.132 | 0.000263118 | 1.3 | PITPNA     | 1.348484848 |
| WVOX           | 1.12E-08 | 0.2424693 | 0.286 | 0.231 | 0.000270164 | 1.3 | WVOX       | 1.238095238 |
| CCDC174        | 1.33E-08 | 0.100054  | 0.224 | 0.17  | 0.000321701 | 1.3 | CCDC174    | 1.317647059 |
| EDF11          | 1.44E-08 | 0.1897595 | 0.097 | 0.066 | 0.00034678  | 1.3 | EDF1       | 1.46969697  |
| PPP1CB1        | 1.54E-08 | 0.1136152 | 0.427 | 0.347 | 0.000371189 | 1.3 | PPP1CB     | 1.23054755  |
| ATM            | 1.64E-08 | 0.1017248 | 0.095 | 0.063 | 0.000396636 | 1.3 | ATM        | 1.507936508 |
| CSNK1E1        | 1.66E-08 | 0.1169147 | 0.283 | 0.222 | 0.000400228 | 1.3 | CSNK1E     | 1.274774775 |
| RP11-440L14.11 | 1.73E-08 | 0.1049476 | 0.059 | 0.035 | 0.000417209 | 1.3 | RP11-440L  | 1.685714286 |
| FBXL5          | 1.92E-08 | 0.1188921 | 0.172 | 0.127 | 0.000462895 | 1.3 | FBXL5      | 1.354330709 |
| APTX           | 1.95E-08 | 0.1011513 | 0.166 | 0.123 | 0.000470316 | 1.3 | APTX       | 1.349593496 |
| ATP6V1E1       | 1.96E-08 | 0.1275992 | 0.352 | 0.287 | 0.000471577 | 1.3 | ATP6V1E1   | 1.226480836 |
| SEPT111        | 2.38E-08 | 0.112308  | 0.137 | 0.098 | 0.000574226 | 1.3 | Sep-11     | 1.397959184 |
| IL6R           | 2.49E-08 | 0.1279314 | 0.094 | 0.063 | 0.000599792 | 1.3 | IL6R       | 1.492063492 |
| HIST1H2BB      | 2.52E-08 | 0.1682343 | 0.214 | 0.166 | 0.000606467 | 1.3 | HIST1H2BB  | 1.289156627 |
| CASP7          | 2.64E-08 | 0.1111368 | 0.205 | 0.156 | 0.000636857 | 1.3 | CASP7      | 1.314102564 |
| SCFD1          | 2.68E-08 | 0.102063  | 0.269 | 0.211 | 0.000645219 | 1.3 | SCFD1      | 1.274881517 |
| MFN11          | 2.77E-08 | 0.1118472 | 0.163 | 0.121 | 0.000669059 | 1.3 | MFN1       | 1.347107438 |
| CARHSP1        | 2.99E-08 | 0.155728  | 0.328 | 0.266 | 0.000719997 | 1.3 | CARHSP1    | 1.233082707 |
| GREB11         | 3.12E-08 | 0.2279127 | 0.101 | 0.069 | 0.000752521 | 1.3 | GREB1      | 1.463768116 |
| RSRP1          | 3.20E-08 | 0.1186294 | 0.313 | 0.25  | 0.000772234 | 1.3 | RSRP1      | 1.252       |
| RBM26          | 3.43E-08 | 0.148352  | 0.242 | 0.189 | 0.000827873 | 1.3 | RBM26      | 1.28042328  |
| AGTPBP1        | 3.73E-08 | 0.1176545 | 0.107 | 0.073 | 0.000900385 | 1.3 | AGTPBP1    | 1.465753425 |
| SON1           | 4.01E-08 | 0.2003324 | 0.73  | 0.674 | 0.000965976 | 1.3 | SON        | 1.083086053 |
| UBE3C1         | 4.19E-08 | 0.1109755 | 0.298 | 0.235 | 0.001009725 | 1.3 | UBE3C      | 1.268085106 |
| SLC7A111       | 4.47E-08 | 0.1037865 | 0.075 | 0.048 | 0.001078039 | 1.3 | SLC7A11    | 1.5625      |
| AP3B1          | 4.50E-08 | 0.1076519 | 0.233 | 0.182 | 0.00108473  | 1.3 | AP3B1      | 1.28021978  |
| TPK12          | 4.79E-08 | 0.1420718 | 0.257 | 0.203 | 0.001155901 | 1.3 | TPK1       | 1.266009852 |
| GAB21          | 5.25E-08 | 0.1084498 | 0.248 | 0.194 | 0.001266008 | 1.3 | GAB2       | 1.278350515 |
| SH2B1          | 5.60E-08 | 0.1417379 | 0.03  | 0.015 | 0.001349846 | 1.3 | SH2B1      | 2           |
| TTC371         | 7.29E-08 | 0.1045432 | 0.175 | 0.131 | 0.001757789 | 1.3 | TTC37      | 1.335877863 |
| ACBD6          | 7.64E-08 | 0.1325615 | 0.11  | 0.077 | 0.001841576 | 1.3 | ACBD6      | 1.428571429 |
| ATP6V1D1       | 7.65E-08 | 0.1018032 | 0.334 | 0.27  | 0.001844898 | 1.3 | ATP6V1D    | 1.237037037 |
| CDKAL1         | 1.14E-07 | 0.1160616 | 0.292 | 0.234 | 0.002747901 | 1.3 | CDKAL1     | 1.247863248 |
| CDC371         | 1.20E-07 | 0.1096595 | 0.046 | 0.027 | 0.002881783 | 1.3 | CDC37      | 1.703703704 |
| ZNF608         | 1.32E-07 | 0.1000324 | 0.225 | 0.175 | 0.00319276  | 1.3 | ZNF608     | 1.285714286 |
| AHR            | 1.70E-07 | 0.1203847 | 0.254 | 0.2   | 0.004110613 | 1.3 | AHR        | 1.27        |
| KCTD71         | 1.78E-07 | 0.1070471 | 0.146 | 0.108 | 0.004284915 | 1.3 | KCTD7      | 1.351851852 |
| FAM114A1       | 1.90E-07 | 0.1287942 | 0.2   | 0.155 | 0.004591316 | 1.3 | FAM114A1   | 1.290322581 |
| HP             | 1.96E-07 | 0.1068538 | 0.026 | 0.012 | 0.004716354 | 1.3 | HP         | 2.166666667 |
| NUBPL          | 2.03E-07 | 0.1077101 | 0.079 | 0.053 | 0.004901803 | 1.3 | NUBPL      | 1.490566038 |
| LINC01252      | 2.11E-07 | 0.1021213 | 0.046 | 0.027 | 0.005090297 | 1.3 | LINC01252  | 1.703703704 |
| SERPINB12      | 2.11E-07 | 0.1355316 | 0.14  | 0.103 | 0.005091727 | 1.3 | SERPINB1   | 1.359223301 |
| PPP2R5A        | 2.17E-07 | 0.1010472 | 0.202 | 0.156 | 0.005238497 | 1.3 | PPP2R5A    | 1.294871795 |



|           |          |           |       |       |             |     |           |             |
|-----------|----------|-----------|-------|-------|-------------|-----|-----------|-------------|
| C10orf76  | 2.81E-07 | 0.1261573 | 0.169 | 0.128 | 0.006784298 | 1.3 | C10orf76  | 1.3203125   |
| KLF3      | 2.84E-07 | 0.1110311 | 0.148 | 0.109 | 0.006846788 | 1.3 | KLF3      | 1.357798165 |
| POLR2L    | 3.19E-07 | 0.1032255 | 0.057 | 0.036 | 0.007691766 | 1.3 | POLR2L    | 1.583333333 |
| PRMT2     | 3.20E-07 | 0.1158029 | 0.169 | 0.128 | 0.007717069 | 1.3 | PRMT2     | 1.3203125   |
| EPS8L2    | 3.94E-07 | 0.1375314 | 0.043 | 0.025 | 0.009510594 | 1.3 | EPS8L2    | 1.72        |
| R3HCC1L   | 5.35E-07 | 0.1046456 | 0.166 | 0.127 | 0.01289272  | 1.3 | R3HCC1L   | 1.307086614 |
| SYMPK     | 5.61E-07 | 0.1060167 | 0.086 | 0.059 | 0.01351576  | 1.3 | SYMPK     | 1.457627119 |
| TOMM20    | 6.32E-07 | 0.1268282 | 0.236 | 0.189 | 0.01523758  | 1.3 | TOMM20    | 1.248677249 |
| TBCK      | 6.46E-07 | 0.1059564 | 0.156 | 0.119 | 0.01557966  | 1.3 | TBCK      | 1.31092437  |
| SGCD1     | 6.65E-07 | 0.1073454 | 0.064 | 0.041 | 0.01603064  | 1.3 | SGCD      | 1.56097561  |
| PTEN      | 7.10E-07 | 0.1987278 | 0.838 | 0.804 | 0.01711163  | 1.3 | PTEN      | 1.042288557 |
| RPLP2     | 7.49E-07 | 0.3790721 | 0.265 | 0.222 | 0.01805376  | 1.3 | RPLP2     | 1.193693694 |
| HIPK3     | 7.61E-07 | 0.1346627 | 0.236 | 0.188 | 0.01834093  | 1.3 | HIPK3     | 1.255319149 |
| SRSF7     | 8.29E-07 | 0.1154    | 0.31  | 0.253 | 0.01998086  | 1.3 | SRSF7     | 1.225296443 |
| SECISBP2L | 1.01E-06 | 0.1102324 | 0.263 | 0.211 | 0.0243737   | 1.3 | SECISBP2L | 1.246445498 |
| EGR1      | 1.01E-06 | 0.1275054 | 0.102 | 0.073 | 0.02440164  | 1.3 | EGR1      | 1.397260274 |
| NUMB      | 1.02E-06 | 0.1034982 | 0.501 | 0.43  | 0.02454298  | 1.3 | NUMB      | 1.165116279 |
| KCNQ5     | 1.05E-06 | 0.1044562 | 0.072 | 0.048 | 0.02526578  | 1.3 | KCNQ5     | 1.5         |
| WDR60     | 1.18E-06 | 0.1336721 | 0.156 | 0.12  | 0.02846401  | 1.3 | WDR60     | 1.3         |
| CLTA      | 1.30E-06 | 0.1005971 | 0.19  | 0.148 | 0.03138005  | 1.3 | CLTA      | 1.283783784 |
| COG5      | 1.32E-06 | 0.1064915 | 0.512 | 0.439 | 0.0317416   | 1.3 | COG5      | 1.166287016 |
| ECHDC2    | 2.02E-06 | 0.1045691 | 0.156 | 0.118 | 0.04859659  | 1.3 | ECHDC2    | 1.322033898 |
| FDCSP1    | 0        | 3.479832  | 0.364 | 0.101 | 0           | 1.4 | FDCSP     | 3.603960396 |
| S100A81   | 0        | 2.913251  | 0.381 | 0.086 | 0           | 1.4 | S100A8    | 4.430232558 |
| SAA11     | 0        | 2.683349  | 0.995 | 0.697 | 0           | 1.4 | SAA1      | 1.427546628 |
| KYNU1     | 0        | 2.635694  | 0.777 | 0.173 | 0           | 1.4 | KYNU      | 4.49132948  |
| LTF1      | 0        | 2.580376  | 0.932 | 0.267 | 0           | 1.4 | LTF       | 3.490636704 |
| FABP7     | 0        | 2.457187  | 0.4   | 0.069 | 0           | 1.4 | FABP7     | 5.797101449 |
| OVOS21    | 0        | 2.447478  | 0.769 | 0.204 | 0           | 1.4 | OVOS2     | 3.769607843 |
| CHI3L11   | 0        | 2.212951  | 0.453 | 0.057 | 0           | 1.4 | CHI3L1    | 7.947368421 |
| FBLN51    | 0        | 2.163622  | 0.664 | 0.101 | 0           | 1.4 | FBLN5     | 6.574257426 |
| CHI3L21   | 0        | 2.134689  | 0.761 | 0.205 | 0           | 1.4 | CHI3L2    | 3.712195122 |
| CCL22     | 0        | 2.098008  | 0.676 | 0.205 | 0           | 1.4 | CCL2      | 3.297560976 |
| FRMD4A2   | 0        | 2.038777  | 0.796 | 0.21  | 0           | 1.4 | FRMD4A    | 3.79047619  |
| RARRES11  | 0        | 2.023326  | 0.716 | 0.147 | 0           | 1.4 | RARRES1   | 4.870748299 |
| SLPI2     | 0        | 1.936807  | 0.879 | 0.508 | 0           | 1.4 | SLPI      | 1.730314961 |
| TNFAIP6   | 0        | 1.891871  | 0.654 | 0.146 | 0           | 1.4 | TNFAIP6   | 4.479452055 |
| ARHGAP261 | 0        | 1.782003  | 0.982 | 0.625 | 0           | 1.4 | ARHGAP26  | 1.5712      |
| LYN2      | 0        | 1.774238  | 0.922 | 0.342 | 0           | 1.4 | LYN       | 2.695906433 |
| SERPINB41 | 0        | 1.772606  | 0.202 | 0.026 | 0           | 1.4 | SERPINB4  | 7.769230769 |
| EVA1C1    | 0        | 1.759207  | 0.802 | 0.231 | 0           | 1.4 | EVA1C     | 3.471861472 |
| VNN31     | 0        | 1.728935  | 0.539 | 0.087 | 0           | 1.4 | VNN3      | 6.195402299 |
| SORBS23   | 0        | 1.726753  | 0.78  | 0.328 | 0           | 1.4 | SORBS2    | 2.37804878  |
| MGAM22    | 0        | 1.709629  | 0.603 | 0.114 | 0           | 1.4 | MGAM2     | 5.289473684 |
| SAA2-SAA4 | 0        | 1.617659  | 0.661 | 0.12  | 0           | 1.4 | SAA2-SAA4 | 5.508333333 |
| SLC25A373 | 0        | 1.610857  | 0.892 | 0.319 | 0           | 1.4 | SLC25A37  | 2.796238245 |
| SERPINB71 | 0        | 1.599854  | 0.41  | 0.052 | 0           | 1.4 | SERPINB7  | 7.884615385 |
| CYP7B11   | 0        | 1.579719  | 0.636 | 0.178 | 0           | 1.4 | CYP7B1    | 3.573033708 |
| PSTPIP21  | 0        | 1.509049  | 0.67  | 0.168 | 0           | 1.4 | PSTPIP2   | 3.988095238 |
| UBD2      | 0        | 1.505735  | 0.301 | 0.063 | 0           | 1.4 | UBD       | 4.777777778 |
| CA82      | 0        | 1.449499  | 0.665 | 0.18  | 0           | 1.4 | CA8       | 3.694444444 |
| MAML23    | 0        | 1.436108  | 0.889 | 0.355 | 0           | 1.4 | MAML2     | 2.504225352 |

|                |   |           |       |       |       |           |             |
|----------------|---|-----------|-------|-------|-------|-----------|-------------|
| TXNIP1         | 0 | 1.399408  | 0.745 | 0.336 | 0 1.4 | TXNIP     | 2.217261905 |
| SOD22          | 0 | 1.39352   | 0.997 | 0.749 | 0 1.4 | SOD2      | 1.331108144 |
| PLEKHS11       | 0 | 1.380521  | 0.521 | 0.078 | 0 1.4 | PLEKHS1   | 6.679487179 |
| CHODL1         | 0 | 1.37964   | 0.446 | 0.078 | 0 1.4 | CHODL     | 5.717948718 |
| SLC34A22       | 0 | 1.366499  | 0.542 | 0.086 | 0 1.4 | SLC34A2   | 6.302325581 |
| DOCK41         | 0 | 1.343173  | 0.699 | 0.263 | 0 1.4 | DOCK4     | 2.657794677 |
| CCL283         | 0 | 1.332183  | 0.78  | 0.312 | 0 1.4 | CCL28     | 2.5         |
| AGAP11         | 0 | 1.332108  | 0.834 | 0.464 | 0 1.4 | AGAP1     | 1.797413793 |
| THADA1         | 0 | 1.310047  | 0.493 | 0.164 | 0 1.4 | THADA     | 3.006097561 |
| PROM12         | 0 | 1.297729  | 0.64  | 0.174 | 0 1.4 | PROM1     | 3.67816092  |
| RP11-114H23.11 | 0 | 1.2623    | 0.357 | 0.073 | 0 1.4 | RP11-114H | 4.890410959 |
| KIT3           | 0 | 1.25362   | 0.565 | 0.125 | 0 1.4 | KIT       | 4.52        |
| DCHS21         | 0 | 1.236639  | 0.362 | 0.038 | 0 1.4 | DCHS2     | 9.526315789 |
| MARCH31        | 0 | 1.235274  | 0.424 | 0.12  | 0 1.4 | MARCH3    | 3.533333333 |
| CNKSR32        | 0 | 1.229286  | 0.642 | 0.265 | 0 1.4 | CNKSR3    | 2.422641509 |
| WFDC22         | 0 | 1.229204  | 0.662 | 0.281 | 0 1.4 | WFDC2     | 2.355871886 |
| EFNA52         | 0 | 1.22489   | 0.653 | 0.233 | 0 1.4 | EFNA5     | 2.802575107 |
| SVIL3          | 0 | 1.21579   | 0.909 | 0.543 | 0 1.4 | SVIL      | 1.674033149 |
| SEMA6A3        | 0 | 1.214029  | 0.565 | 0.178 | 0 1.4 | SEMA6A    | 3.174157303 |
| CNTN41         | 0 | 1.213674  | 0.419 | 0.1   | 0 1.4 | CNTN4     | 4.19        |
| MTHFD2L2       | 0 | 1.192647  | 0.773 | 0.354 | 0 1.4 | MTHFD2L   | 2.183615819 |
| C32            | 0 | 1.18007   | 0.508 | 0.1   | 0 1.4 | C3        | 5.08        |
| HS3ST42        | 0 | 1.176277  | 0.516 | 0.146 | 0 1.4 | HS3ST4    | 3.534246575 |
| PIK3R11        | 0 | 1.175636  | 0.486 | 0.131 | 0 1.4 | PIK3R1    | 3.709923664 |
| NCOA73         | 0 | 1.175401  | 0.813 | 0.392 | 0 1.4 | NCOA7     | 2.073979592 |
| RAPGEF52       | 0 | 1.173599  | 0.694 | 0.293 | 0 1.4 | RAPGEF5   | 2.368600683 |
| SFRP13         | 0 | 1.171654  | 0.609 | 0.176 | 0 1.4 | SFRP1     | 3.460227273 |
| ALPK11         | 0 | 1.163068  | 0.575 | 0.173 | 0 1.4 | ALPK1     | 3.323699422 |
| SORBS12        | 0 | 1.146185  | 0.555 | 0.151 | 0 1.4 | SORBS1    | 3.675496689 |
| PDE4B3         | 0 | 1.138603  | 0.961 | 0.46  | 0 1.4 | PDE4B     | 2.089130435 |
| HSD11B12       | 0 | 1.129923  | 0.377 | 0.06  | 0 1.4 | HSD11B1   | 6.283333333 |
| CCND31         | 0 | 1.119279  | 0.62  | 0.239 | 0 1.4 | CCND3     | 2.594142259 |
| MAP3K133       | 0 | 1.097066  | 0.916 | 0.582 | 0 1.4 | MAP3K13   | 1.573883162 |
| BBOX13         | 0 | 1.079669  | 0.389 | 0.091 | 0 1.4 | BBOX1     | 4.274725275 |
| PTPN22         | 0 | 1.07619   | 0.578 | 0.203 | 0 1.4 | PTPN2     | 2.84729064  |
| SLC28A32       | 0 | 1.074968  | 0.536 | 0.13  | 0 1.4 | SLC28A3   | 4.123076923 |
| GABRP3         | 0 | 1.064567  | 0.628 | 0.218 | 0 1.4 | GABRP     | 2.880733945 |
| ST51           | 0 | 1.047752  | 0.693 | 0.296 | 0 1.4 | ST5       | 2.341216216 |
| ANK31          | 0 | 1.047005  | 0.626 | 0.264 | 0 1.4 | ANK3      | 2.371212121 |
| SLC26A21       | 0 | 1.026377  | 0.313 | 0.051 | 0 1.4 | SLC26A2   | 6.137254902 |
| PDZRN31        | 0 | 1.024124  | 0.37  | 0.066 | 0 1.4 | PDZRN3    | 5.606060606 |
| PADI21         | 0 | 1.018897  | 0.368 | 0.051 | 0 1.4 | PADI2     | 7.215686275 |
| PLXDC21        | 0 | 1.008537  | 0.42  | 0.085 | 0 1.4 | PLXDC2    | 4.941176471 |
| RIN21          | 0 | 0.9926191 | 0.514 | 0.171 | 0 1.4 | RIN2      | 3.005847953 |
| MEIS22         | 0 | 0.9805151 | 0.405 | 0.094 | 0 1.4 | MEIS2     | 4.308510638 |
| ELF52          | 0 | 0.9792623 | 0.439 | 0.105 | 0 1.4 | ELF5      | 4.180952381 |
| ZNF5211        | 0 | 0.9752873 | 0.345 | 0.06  | 0 1.4 | ZNF521    | 5.75        |
| NR2F2-AS11     | 0 | 0.9648049 | 0.322 | 0.04  | 0 1.4 | NR2F2-AS1 | 8.05        |
| RASGRP11       | 0 | 0.9619503 | 0.33  | 0.036 | 0 1.4 | RASGRP1   | 9.166666667 |
| VNN12          | 0 | 0.936522  | 0.389 | 0.093 | 0 1.4 | VNN1      | 4.182795699 |
| GUCY1A32       | 0 | 0.9187783 | 0.358 | 0.083 | 0 1.4 | GUCY1A3   | 4.313253012 |
| PODXL1         | 0 | 0.8960945 | 0.36  | 0.067 | 0 1.4 | PODXL     | 5.373134328 |

|                |           |           |       |       |           |     |           |             |
|----------------|-----------|-----------|-------|-------|-----------|-----|-----------|-------------|
| IFI162         | 0         | 0.8741174 | 0.404 | 0.1   | 0         | 1.4 | IFI16     | 4.04        |
| CTD-2015G9.21  | 0         | 0.8397638 | 0.332 | 0.054 | 0         | 1.4 | CTD-2015G | 6.148148148 |
| ZNF518A1       | 0         | 0.8330162 | 0.377 | 0.099 | 0         | 1.4 | ZNF518A   | 3.808080808 |
| SAA42          | 0         | 0.7675089 | 0.385 | 0.099 | 0         | 1.4 | SAA4      | 3.888888889 |
| MARCO1         | 0         | 0.7503821 | 0.227 | 0.024 | 0         | 1.4 | MARCO     | 9.458333333 |
| C10orf901      | 0         | 0.7422067 | 0.25  | 0.031 | 0         | 1.4 | C10orf90  | 8.064516129 |
| NALCN1         | 0         | 0.7314488 | 0.279 | 0.052 | 0         | 1.4 | NALCN     | 5.365384615 |
| RP11-449D8.51  | 0         | 0.7179585 | 0.198 | 0.023 | 0         | 1.4 | RP11-449D | 8.608695652 |
| RP11-739G5.1   | 0         | 0.7118937 | 0.131 | 0.007 | 0         | 1.4 | RP11-739G | 18.71428571 |
| GLIPR22        | 0         | 0.711588  | 0.253 | 0.037 | 0         | 1.4 | GLIPR2    | 6.837837838 |
| CLEC7A1        | 0         | 0.6804386 | 0.258 | 0.047 | 0         | 1.4 | CLEC7A    | 5.489361702 |
| SCARA31        | 0         | 0.6479124 | 0.181 | 0.013 | 0         | 1.4 | SCARA3    | 13.92307692 |
| TNIP31         | 0         | 0.5620333 | 0.185 | 0.019 | 0         | 1.4 | TNIP3     | 9.736842105 |
| FMN11          | 5.50E-307 | 0.8225176 | 0.331 | 0.078 | 1.33E-302 | 1.4 | FMN1      | 4.243589744 |
| TRABD2B1       | 1.42E-305 | 0.7751819 | 0.22  | 0.034 | 3.41E-301 | 1.4 | TRABD2B   | 6.470588235 |
| SLC39A81       | 1.02E-301 | 0.9372409 | 0.302 | 0.067 | 2.47E-297 | 1.4 | SLC39A8   | 4.507462687 |
| FAM129A3       | 1.23E-299 | 1.111697  | 0.587 | 0.232 | 2.97E-295 | 1.4 | FAM129A   | 2.530172414 |
| TLR22          | 2.67E-298 | 0.8456721 | 0.436 | 0.136 | 6.44E-294 | 1.4 | TLR2      | 3.205882353 |
| GLRX3          | 1.55E-296 | 0.8602602 | 0.609 | 0.247 | 3.74E-292 | 1.4 | GLRX      | 2.465587045 |
| AKR1C31        | 2.93E-294 | 0.7292614 | 0.317 | 0.073 | 7.07E-290 | 1.4 | AKR1C3    | 4.342465753 |
| B2M3           | 6.47E-294 | 0.88522   | 0.981 | 0.97  | 1.56E-289 | 1.4 | B2M       | 1.011340206 |
| ITPR21         | 7.93E-294 | 1.11776   | 0.774 | 0.436 | 1.91E-289 | 1.4 | ITPR2     | 1.775229358 |
| PDZK1IP11      | 6.26E-293 | 0.9264813 | 0.294 | 0.064 | 1.51E-288 | 1.4 | PDZK1IP1  | 4.59375     |
| EYA22          | 5.11E-289 | 0.7904003 | 0.324 | 0.078 | 1.23E-284 | 1.4 | EYA2      | 4.153846154 |
| RP11-142C4.61  | 1.18E-287 | 0.6769519 | 0.239 | 0.043 | 2.86E-283 | 1.4 | RP11-142C | 5.558139535 |
| CHPT11         | 2.85E-287 | 1.222849  | 0.614 | 0.272 | 6.86E-283 | 1.4 | CHPT1     | 2.257352941 |
| DEFB12         | 3.15E-284 | 0.9865559 | 0.767 | 0.397 | 7.59E-280 | 1.4 | DEFB1     | 1.931989924 |
| LBP            | 8.19E-284 | 0.5448661 | 0.11  | 0.006 | 1.97E-279 | 1.4 | LBP       | 18.33333333 |
| C10orf101      | 9.49E-282 | 0.7651404 | 0.317 | 0.077 | 2.29E-277 | 1.4 | C10orf10  | 4.116883117 |
| L3MBTL42       | 1.63E-281 | 0.819734  | 0.446 | 0.143 | 3.92E-277 | 1.4 | L3MBTL4   | 3.118881119 |
| SYNM1          | 1.40E-278 | 0.840201  | 0.275 | 0.059 | 3.37E-274 | 1.4 | SYNM      | 4.661016949 |
| ARRDC33        | 6.10E-278 | 0.8025684 | 0.725 | 0.34  | 1.47E-273 | 1.4 | ARRDC3    | 2.132352941 |
| RP11-519G16.5  | 5.78E-276 | 0.7782739 | 0.214 | 0.036 | 1.39E-271 | 1.4 | RP11-519G | 5.944444444 |
| FBN1           | 1.18E-274 | 0.5626452 | 0.156 | 0.017 | 2.84E-270 | 1.4 | FBN1      | 9.176470588 |
| ST8SIA11       | 6.05E-271 | 0.6907139 | 0.294 | 0.069 | 1.46E-266 | 1.4 | ST8SIA1   | 4.260869565 |
| SERPINB31      | 2.55E-264 | 1.473287  | 0.174 | 0.024 | 6.15E-260 | 1.4 | SERPINB3  | 7.25        |
| RP11-536O18.12 | 2.88E-263 | 0.6087359 | 0.21  | 0.036 | 6.95E-259 | 1.4 | RP11-536O | 5.833333333 |
| COL27A11       | 3.28E-263 | 0.7407393 | 0.214 | 0.038 | 7.91E-259 | 1.4 | COL27A1   | 5.631578947 |
| RP11-519G16.3  | 3.85E-263 | 0.9405226 | 0.816 | 0.47  | 9.29E-259 | 1.4 | RP11-519G | 1.736170213 |
| CTSS2          | 1.74E-262 | 0.7646311 | 0.37  | 0.108 | 4.20E-258 | 1.4 | CTSS      | 3.425925926 |
| DMD3           | 1.46E-261 | 0.9071942 | 0.554 | 0.223 | 3.52E-257 | 1.4 | DMD       | 2.484304933 |
| C1S1           | 2.93E-257 | 0.5429202 | 0.24  | 0.048 | 7.07E-253 | 1.4 | C1S       | 5           |
| SKAP22         | 2.43E-256 | 0.7613799 | 0.459 | 0.161 | 5.86E-252 | 1.4 | SKAP2     | 2.850931677 |
| AC016995.32    | 2.59E-256 | 0.8686721 | 0.339 | 0.096 | 6.25E-252 | 1.4 | AC016995  | 3.53125     |
| SEMA6A-AS12    | 1.30E-255 | 0.8616123 | 0.353 | 0.102 | 3.14E-251 | 1.4 | SEMA6A-A  | 3.460784314 |
| MOB3B2         | 2.94E-255 | 0.6747678 | 0.386 | 0.118 | 7.10E-251 | 1.4 | MOB3B     | 3.271186441 |
| C1R1           | 8.09E-252 | 0.4998373 | 0.162 | 0.021 | 1.95E-247 | 1.4 | C1R       | 7.714285714 |
| TNFAIP21       | 1.43E-249 | 1.24767   | 0.555 | 0.232 | 3.45E-245 | 1.4 | TNFAIP2   | 2.392241379 |
| RPS27A3        | 2.27E-248 | 0.6250003 | 0.978 | 0.97  | 5.48E-244 | 1.4 | RPS27A    | 1.008247423 |
| RP11-266O8.1   | 2.20E-247 | 0.6682324 | 0.14  | 0.015 | 5.30E-243 | 1.4 | RP11-266O | 9.333333333 |
| GHR2           | 2.81E-247 | 0.8367993 | 0.264 | 0.061 | 6.76E-243 | 1.4 | GHR       | 4.327868852 |
| DTNB2          | 2.35E-246 | 0.8639787 | 0.731 | 0.388 | 5.67E-242 | 1.4 | DTNB      | 1.884020619 |

|               |           |           |       |       |           |     |           |             |
|---------------|-----------|-----------|-------|-------|-----------|-----|-----------|-------------|
| RGL11         | 1.97E-244 | 0.5206064 | 0.198 | 0.034 | 4.76E-240 | 1.4 | RGL1      | 5.823529412 |
| SLFN51        | 7.53E-242 | 0.6734937 | 0.56  | 0.235 | 1.82E-237 | 1.4 | SLFN5     | 2.382978723 |
| PHLDA11       | 1.75E-240 | 0.659442  | 0.277 | 0.068 | 4.21E-236 | 1.4 | PHLDA1    | 4.073529412 |
| ZC3H12C2      | 7.32E-239 | 0.7320203 | 0.322 | 0.09  | 1.77E-234 | 1.4 | ZC3H12C   | 3.577777778 |
| UCK22         | 1.94E-238 | 0.7382553 | 0.288 | 0.074 | 4.67E-234 | 1.4 | UCK2      | 3.891891892 |
| RPS73         | 1.59E-237 | 0.6592078 | 0.961 | 0.911 | 3.83E-233 | 1.4 | RPS7      | 1.054884742 |
| LUCAT12       | 1.27E-236 | 0.8497608 | 0.462 | 0.17  | 3.06E-232 | 1.4 | LUCAT1    | 2.717647059 |
| RNF1502       | 3.35E-236 | 0.7308597 | 0.232 | 0.049 | 8.07E-232 | 1.4 | RNF150    | 4.734693878 |
| CLLU1OS1      | 3.96E-236 | 0.4792052 | 0.18  | 0.029 | 9.54E-232 | 1.4 | CLLU1OS   | 6.206896552 |
| C4orf191      | 1.35E-233 | 0.8308833 | 0.365 | 0.117 | 3.25E-229 | 1.4 | C4orf19   | 3.11965812  |
| ARHGAP26-AS12 | 1.52E-232 | 0.8538076 | 0.371 | 0.119 | 3.68E-228 | 1.4 | ARHGAP26  | 3.117647059 |
| DENND2D1      | 3.94E-230 | 0.5628155 | 0.259 | 0.062 | 9.51E-226 | 1.4 | DENND2D   | 4.177419355 |
| PAPSS13       | 4.89E-229 | 0.7985507 | 0.491 | 0.195 | 1.18E-224 | 1.4 | PAPSS1    | 2.517948718 |
| MMP73         | 7.39E-226 | 0.7075538 | 0.378 | 0.122 | 1.78E-221 | 1.4 | MMP7      | 3.098360656 |
| FAM157C2      | 1.52E-223 | 0.5869371 | 0.257 | 0.062 | 3.68E-219 | 1.4 | FAM157C   | 4.14516129  |
| CACNB21       | 1.37E-222 | 0.7073633 | 0.28  | 0.074 | 3.30E-218 | 1.4 | CACNB2    | 3.783783784 |
| CLU1          | 9.05E-220 | 1.10152   | 0.256 | 0.063 | 2.18E-215 | 1.4 | CLU       | 4.063492063 |
| ASS11         | 2.03E-219 | 0.6134716 | 0.262 | 0.066 | 4.90E-215 | 1.4 | ASS1      | 3.96969697  |
| SOX101        | 3.08E-219 | 0.5877475 | 0.208 | 0.042 | 7.43E-215 | 1.4 | SOX10     | 4.952380952 |
| EGFR2         | 3.69E-219 | 0.7532834 | 0.418 | 0.149 | 8.91E-215 | 1.4 | EGFR      | 2.805369128 |
| RPS233        | 8.35E-219 | 0.5769108 | 0.975 | 0.967 | 2.01E-214 | 1.4 | RPS23     | 1.008273009 |
| LINC012353    | 5.79E-216 | 0.6052939 | 0.272 | 0.071 | 1.40E-211 | 1.4 | LINC01235 | 3.830985915 |
| CEPT12        | 2.13E-215 | 0.6826488 | 0.413 | 0.15  | 5.15E-211 | 1.4 | CEPT1     | 2.753333333 |
| SMARCD31      | 1.52E-213 | 0.3500409 | 0.099 | 0.008 | 3.65E-209 | 1.4 | SMARCD3   | 12.375      |
| OSMR2         | 4.88E-210 | 0.8360945 | 0.574 | 0.272 | 1.18E-205 | 1.4 | OSMR      | 2.110294118 |
| ENPP61        | 6.40E-210 | 0.3964432 | 0.12  | 0.013 | 1.54E-205 | 1.4 | ENPP6     | 9.230769231 |
| RPL63         | 2.78E-208 | 0.5793727 | 0.967 | 0.947 | 6.69E-204 | 1.4 | RPL6      | 1.021119324 |
| SGPP22        | 2.81E-208 | 0.6631985 | 0.299 | 0.086 | 6.77E-204 | 1.4 | SGPP2     | 3.476744186 |
| CCL202        | 8.49E-208 | 1.220871  | 0.409 | 0.155 | 2.05E-203 | 1.4 | CCL20     | 2.638709677 |
| PIGR3         | 2.32E-206 | 0.8321327 | 0.516 | 0.214 | 5.61E-202 | 1.4 | PIGR      | 2.411214953 |
| SLC39A143     | 6.38E-205 | 0.7454439 | 0.438 | 0.168 | 1.54E-200 | 1.4 | SLC39A14  | 2.607142857 |
| CYP1B1        | 2.44E-204 | 0.5444326 | 0.308 | 0.091 | 5.88E-200 | 1.4 | CYP1B1    | 3.384615385 |
| IFITM31       | 3.19E-203 | 0.8051613 | 0.408 | 0.156 | 7.70E-199 | 1.4 | IFITM3    | 2.615384615 |
| PPP2R3A2      | 9.00E-202 | 0.8196082 | 0.593 | 0.293 | 2.17E-197 | 1.4 | PPP2R3A   | 2.023890785 |
| PRELID11      | 7.33E-201 | 0.5387406 | 0.25  | 0.064 | 1.77E-196 | 1.4 | PRELID1   | 3.90625     |
| PIWIL41       | 7.78E-200 | 0.3975901 | 0.135 | 0.019 | 1.88E-195 | 1.4 | PIWIL4    | 7.105263158 |
| UST1          | 8.58E-198 | 0.8428318 | 0.409 | 0.157 | 2.07E-193 | 1.4 | UST       | 2.605095541 |
| BIRC33        | 3.33E-197 | 0.6846147 | 0.862 | 0.58  | 8.02E-193 | 1.4 | BIRC3     | 1.486206897 |
| TRPS11        | 4.90E-196 | 0.8228939 | 0.909 | 0.716 | 1.18E-191 | 1.4 | TRPS1     | 1.269553073 |
| NFIB2         | 6.49E-196 | 0.7128299 | 0.925 | 0.717 | 1.57E-191 | 1.4 | NFIB      | 1.290097629 |
| LINC011841    | 2.20E-195 | 0.6367625 | 0.346 | 0.116 | 5.30E-191 | 1.4 | LINC01184 | 2.982758621 |
| TANK3         | 2.65E-195 | 0.7700992 | 0.739 | 0.44  | 6.38E-191 | 1.4 | TANK      | 1.679545455 |
| FGGY2         | 1.32E-194 | 0.6576362 | 0.339 | 0.113 | 3.17E-190 | 1.4 | FGGY      | 3           |
| GXYLT21       | 8.41E-194 | 0.476465  | 0.177 | 0.034 | 2.03E-189 | 1.4 | GXYLT2    | 5.205882353 |
| BOC1          | 1.16E-193 | 0.3416734 | 0.096 | 0.008 | 2.81E-189 | 1.4 | BOC       | 12          |
| C15orf481     | 3.61E-192 | 1.264505  | 0.722 | 0.47  | 8.71E-188 | 1.4 | C15orf48  | 1.536170213 |
| CMPK12        | 1.63E-191 | 0.6874719 | 0.442 | 0.178 | 3.94E-187 | 1.4 | CMPK1     | 2.483146067 |
| MT-CO33       | 8.77E-191 | 0.4640066 | 0.99  | 0.996 | 2.12E-186 | 1.4 | MT-CO3    | 0.993975904 |
| MIR646HG1     | 1.16E-190 | 0.5323199 | 0.183 | 0.037 | 2.79E-186 | 1.4 | MIR646HG  | 4.945945946 |
| PNISR2        | 1.55E-189 | 0.701153  | 0.879 | 0.654 | 3.73E-185 | 1.4 | PNISR     | 1.344036697 |
| HP1           | 6.44E-189 | 0.9007689 | 0.08  | 0.005 | 1.55E-184 | 1.4 | HP        | 16          |
| FMO22         | 2.46E-188 | 0.5691124 | 0.192 | 0.042 | 5.94E-184 | 1.4 | FMO2      | 4.571428571 |

|                |           |           |       |       |           |     |            |             |
|----------------|-----------|-----------|-------|-------|-----------|-----|------------|-------------|
| EEF1B23        | 5.18E-185 | 0.6285546 | 0.902 | 0.707 | 1.25E-180 | 1.4 | EEF1B2     | 1.275813296 |
| DOCK71         | 6.03E-185 | 0.6986857 | 0.358 | 0.128 | 1.45E-180 | 1.4 | DOCK7      | 2.796875    |
| GALNT151       | 4.11E-184 | 0.7073194 | 0.216 | 0.053 | 9.92E-180 | 1.4 | GALNT15    | 4.075471698 |
| TCF7L13        | 1.20E-183 | 0.683772  | 0.405 | 0.155 | 2.90E-179 | 1.4 | TCF7L1     | 2.612903226 |
| RPL323         | 1.76E-183 | 0.5094811 | 0.975 | 0.976 | 4.24E-179 | 1.4 | RPL32      | 0.99897541  |
| RANBP172       | 9.75E-183 | 0.6017773 | 0.275 | 0.082 | 2.35E-178 | 1.4 | RANBP17    | 3.353658537 |
| LINC011221     | 2.66E-182 | 0.5062801 | 0.138 | 0.022 | 6.42E-178 | 1.4 | LINC01122  | 6.272727273 |
| SLC5A61        | 6.07E-181 | 0.5545489 | 0.255 | 0.072 | 1.46E-176 | 1.4 | SLC5A6     | 3.541666667 |
| C1RL1          | 1.16E-180 | 0.5673908 | 0.229 | 0.06  | 2.80E-176 | 1.4 | C1RL       | 3.816666667 |
| RPL303         | 1.24E-180 | 0.4740505 | 0.969 | 0.952 | 2.98E-176 | 1.4 | RPL30      | 1.017857143 |
| RP11-141O11.21 | 1.35E-179 | 0.3335646 | 0.092 | 0.009 | 3.26E-175 | 1.4 | RP11-141O  | 10.22222222 |
| ALDH1A33       | 4.72E-179 | 0.6890239 | 0.533 | 0.243 | 1.14E-174 | 1.4 | ALDH1A3    | 2.193415638 |
| CCL41          | 1.21E-178 | 2.587351  | 0.168 | 0.034 | 2.91E-174 | 1.4 | CCL4       | 4.941176471 |
| LINC011381     | 3.71E-178 | 0.6592114 | 0.376 | 0.143 | 8.93E-174 | 1.4 | LINC01138  | 2.629370629 |
| TPST11         | 1.44E-177 | 0.6940212 | 0.282 | 0.087 | 3.48E-173 | 1.4 | TPST1      | 3.24137931  |
| FAM177B2       | 5.00E-177 | 0.9883458 | 0.749 | 0.46  | 1.21E-172 | 1.4 | FAM177B    | 1.62826087  |
| NPAS31         | 4.50E-175 | 0.6930932 | 0.268 | 0.081 | 1.09E-170 | 1.4 | NPAS3      | 3.308641975 |
| SLC11A22       | 1.45E-174 | 0.6941155 | 0.607 | 0.315 | 3.51E-170 | 1.4 | SLC11A2    | 1.926984127 |
| HMGN31         | 8.16E-174 | 0.5534468 | 0.299 | 0.097 | 1.97E-169 | 1.4 | HMGN3      | 3.082474227 |
| SPX1           | 8.39E-174 | 0.3479703 | 0.107 | 0.013 | 2.02E-169 | 1.4 | SPX        | 8.230769231 |
| PPP1R9A1       | 2.75E-173 | 0.6637992 | 0.355 | 0.131 | 6.64E-169 | 1.4 | PPP1R9A    | 2.709923664 |
| SLC18B13       | 2.95E-173 | 0.6021685 | 0.274 | 0.084 | 7.12E-169 | 1.4 | SLC18B1    | 3.261904762 |
| LINC011983     | 1.84E-171 | 0.6274197 | 0.353 | 0.128 | 4.43E-167 | 1.4 | LINC01198  | 2.7578125   |
| RPL44          | 4.27E-171 | 0.5258175 | 0.959 | 0.882 | 1.03E-166 | 1.4 | RPL4       | 1.087301587 |
| RPL113         | 1.42E-170 | 0.505058  | 0.973 | 0.957 | 3.42E-166 | 1.4 | RPL11      | 1.016718913 |
| ADAMTS9-AS22   | 2.59E-170 | 0.6458016 | 0.362 | 0.136 | 6.24E-166 | 1.4 | ADAMTS9-   | 2.661764706 |
| PLSCR12        | 4.68E-170 | 0.6265603 | 0.408 | 0.166 | 1.13E-165 | 1.4 | PLSCR1     | 2.457831325 |
| PPM1H1         | 3.31E-169 | 0.8224031 | 0.555 | 0.283 | 7.98E-165 | 1.4 | PPM1H      | 1.961130742 |
| SLC12A22       | 4.03E-169 | 0.8281934 | 0.657 | 0.378 | 9.71E-165 | 1.4 | SLC12A2    | 1.738095238 |
| RP11-66B24.52  | 1.07E-168 | 0.4433643 | 0.171 | 0.036 | 2.57E-164 | 1.4 | RP11-66B2  | 4.75        |
| STOX22         | 2.81E-168 | 0.5415715 | 0.247 | 0.072 | 6.78E-164 | 1.4 | STOX2      | 3.430555556 |
| FAM20C1        | 2.42E-166 | 0.5638074 | 0.178 | 0.04  | 5.83E-162 | 1.4 | FAM20C     | 4.45        |
| FAM20A1        | 4.72E-166 | 0.433056  | 0.156 | 0.031 | 1.14E-161 | 1.4 | FAM20A     | 5.032258065 |
| ST6GAL12       | 1.61E-165 | 0.7214817 | 0.481 | 0.222 | 3.88E-161 | 1.4 | ST6GAL1    | 2.166666667 |
| RP5-1198O20.41 | 4.16E-165 | 0.6341207 | 0.23  | 0.064 | 1.00E-160 | 1.4 | RP5-1198O  | 3.59375     |
| ITGB83         | 3.72E-164 | 0.6692705 | 0.761 | 0.463 | 8.97E-160 | 1.4 | ITGB8      | 1.64362851  |
| C4BPA1         | 7.63E-164 | 0.3581435 | 0.098 | 0.011 | 1.84E-159 | 1.4 | C4BPA      | 8.909090909 |
| KREMEN11       | 8.68E-164 | 0.4296423 | 0.164 | 0.034 | 2.09E-159 | 1.4 | KREMEN1    | 4.823529412 |
| RBPMS3         | 4.55E-162 | 0.697085  | 0.864 | 0.634 | 1.10E-157 | 1.4 | RBPMS      | 1.362776025 |
| IL343          | 5.02E-162 | 0.5764589 | 0.228 | 0.063 | 1.21E-157 | 1.4 | IL34       | 3.619047619 |
| AL109761.51    | 6.63E-161 | 0.3006087 | 0.105 | 0.014 | 1.60E-156 | 1.4 | AL109761.! | 7.5         |
| JPX1           | 1.08E-159 | 0.632546  | 0.395 | 0.164 | 2.61E-155 | 1.4 | JPX        | 2.408536585 |
| ABCC4          | 2.99E-159 | 0.3975046 | 0.1   | 0.012 | 7.21E-155 | 1.4 | ABCC4      | 8.333333333 |
| PLA2R11        | 5.08E-159 | 0.7069965 | 0.393 | 0.163 | 1.22E-154 | 1.4 | PLA2R1     | 2.411042945 |
| TNFRSF1B2      | 1.80E-158 | 0.3363875 | 0.135 | 0.024 | 4.34E-154 | 1.4 | TNFRSF1B   | 5.625       |
| BRINP12        | 2.98E-156 | 0.7423706 | 0.264 | 0.084 | 7.20E-152 | 1.4 | BRINP1     | 3.142857143 |
| SYNPO22        | 5.65E-156 | 0.8317045 | 0.257 | 0.081 | 1.36E-151 | 1.4 | SYNPO2     | 3.172839506 |
| RPL53          | 1.37E-154 | 0.4790236 | 0.965 | 0.938 | 3.30E-150 | 1.4 | RPL5       | 1.028784648 |
| ST6GALNAC53    | 1.75E-154 | 0.687033  | 0.393 | 0.16  | 4.21E-150 | 1.4 | ST6GALNA(  | 2.45625     |
| GENE1          | 9.13E-154 | 0.5844723 | 0.303 | 0.108 | 2.20E-149 | 1.4 | GENE       | 2.805555556 |
| NRG21          | 1.18E-153 | 0.393292  | 0.117 | 0.018 | 2.84E-149 | 1.4 | NRG2       | 6.5         |
| CCSER11        | 2.44E-153 | 0.66641   | 0.685 | 0.411 | 5.88E-149 | 1.4 | CCSER1     | 1.666666667 |

|                |           |           |       |       |           |     |            |             |
|----------------|-----------|-----------|-------|-------|-----------|-----|------------|-------------|
| SIK33          | 1.44E-152 | 0.5321016 | 0.982 | 0.971 | 3.47E-148 | 1.4 | SIK3       | 1.011328527 |
| PDE8A3         | 1.77E-151 | 0.790588  | 0.555 | 0.299 | 4.27E-147 | 1.4 | PDE8A      | 1.856187291 |
| AC097724.33    | 7.20E-151 | 0.3852535 | 0.148 | 0.031 | 1.74E-146 | 1.4 | AC097724.. | 4.774193548 |
| RPL143         | 2.10E-150 | 0.4297317 | 0.97  | 0.959 | 5.05E-146 | 1.4 | RPL14      | 1.011470282 |
| C4BPB1         | 3.19E-150 | 0.2869103 | 0.095 | 0.012 | 7.68E-146 | 1.4 | C4BPB      | 7.916666667 |
| APOO3          | 6.55E-149 | 0.4190634 | 0.973 | 0.966 | 1.58E-144 | 1.4 | APOO       | 1.007246377 |
| FAS3           | 1.42E-148 | 0.4692818 | 0.253 | 0.08  | 3.42E-144 | 1.4 | FAS        | 3.1625      |
| KCNJ21         | 3.80E-148 | 0.2077021 | 0.065 | 0.004 | 9.17E-144 | 1.4 | KCNJ2      | 16.25       |
| RPL73          | 5.18E-148 | 0.7032684 | 0.951 | 0.867 | 1.25E-143 | 1.4 | RPL7       | 1.096885813 |
| RPL35A3        | 5.76E-148 | 0.4630743 | 0.971 | 0.953 | 1.39E-143 | 1.4 | RPL35A     | 1.018887723 |
| RP1-28O10.11   | 7.47E-148 | 0.3376383 | 0.132 | 0.025 | 1.80E-143 | 1.4 | RP1-28O10  | 5.28        |
| LRIG11         | 1.29E-147 | 0.7925388 | 0.438 | 0.203 | 3.12E-143 | 1.4 | LRIG1      | 2.157635468 |
| C1QTNF11       | 2.00E-147 | 0.3112818 | 0.097 | 0.013 | 4.82E-143 | 1.4 | C1QTNF1    | 7.461538462 |
| HIBADH2        | 7.09E-147 | 0.5404353 | 0.287 | 0.101 | 1.71E-142 | 1.4 | HIBADH     | 2.841584158 |
| RPS63          | 1.88E-146 | 0.444926  | 0.975 | 0.978 | 4.53E-142 | 1.4 | RPS6       | 0.996932515 |
| PNRC12         | 2.62E-146 | 0.6566411 | 0.649 | 0.388 | 6.33E-142 | 1.4 | PNRC1      | 1.672680412 |
| C21orf91-OT11  | 1.65E-145 | 0.3059305 | 0.097 | 0.013 | 3.97E-141 | 1.4 | C21orf91-C | 7.461538462 |
| RPSA3          | 1.77E-145 | 0.5526185 | 0.928 | 0.795 | 4.26E-141 | 1.4 | RPSA       | 1.167295597 |
| AKR1C11        | 4.93E-144 | 0.5949479 | 0.203 | 0.057 | 1.19E-139 | 1.4 | AKR1C1     | 3.561403509 |
| MT-ND43        | 6.51E-144 | 0.4154276 | 0.986 | 0.995 | 1.57E-139 | 1.4 | MT-ND4     | 0.990954774 |
| ENOSF11        | 8.61E-144 | 0.6094775 | 0.358 | 0.147 | 2.08E-139 | 1.4 | ENOSF1     | 2.43537415  |
| RPS273         | 1.38E-143 | 0.8667051 | 0.819 | 0.613 | 3.33E-139 | 1.4 | RPS27      | 1.336052202 |
| MT-CO23        | 6.09E-143 | 0.4939102 | 0.982 | 0.987 | 1.47E-138 | 1.4 | MT-CO2     | 0.994934144 |
| AC009313.13    | 1.25E-142 | 0.4213524 | 0.185 | 0.048 | 3.01E-138 | 1.4 | AC009313.  | 3.854166667 |
| RP11-290O12.21 | 5.29E-142 | 0.5931139 | 0.188 | 0.05  | 1.27E-137 | 1.4 | RP11-290O  | 3.76        |
| RPL213         | 1.79E-141 | 0.5275462 | 0.948 | 0.86  | 4.32E-137 | 1.4 | RPL21      | 1.102325581 |
| MINA1          | 2.01E-141 | 0.3384652 | 0.143 | 0.03  | 4.85E-137 | 1.4 | MINA       | 4.766666667 |
| SLC24A31       | 2.48E-141 | 0.5328712 | 0.274 | 0.095 | 5.98E-137 | 1.4 | SLC24A3    | 2.884210526 |
| PDXK1          | 1.88E-140 | 0.5356666 | 0.269 | 0.093 | 4.54E-136 | 1.4 | PDXK       | 2.892473118 |
| USP131         | 2.63E-140 | 0.4156582 | 0.152 | 0.034 | 6.35E-136 | 1.4 | USP13      | 4.470588235 |
| ARHGAP441      | 1.91E-139 | 0.5643842 | 0.369 | 0.154 | 4.60E-135 | 1.4 | ARHGAP44   | 2.396103896 |
| EEF1A13        | 1.02E-137 | 0.4174945 | 0.975 | 0.975 | 2.47E-133 | 1.4 | EEF1A1     | 1           |
| RP11-356C4.53  | 1.80E-137 | 0.6062469 | 0.325 | 0.127 | 4.35E-133 | 1.4 | RP11-356C  | 2.559055118 |
| VCAM1          | 2.08E-137 | 0.2468133 | 0.053 | 0.003 | 5.01E-133 | 1.4 | VCAM1      | 17.66666667 |
| TLR51          | 2.77E-137 | 0.2864916 | 0.11  | 0.018 | 6.69E-133 | 1.4 | TLR5       | 6.111111111 |
| OSMR-AS11      | 9.64E-137 | 0.5648104 | 0.356 | 0.148 | 2.32E-132 | 1.4 | OSMR-AS1   | 2.405405405 |
| LAP31          | 1.29E-135 | 0.5547849 | 0.274 | 0.099 | 3.11E-131 | 1.4 | LAP3       | 2.767676768 |
| NMI1           | 2.40E-135 | 0.4061152 | 0.201 | 0.058 | 5.80E-131 | 1.4 | NMI        | 3.465517241 |
| SFT2D23        | 1.21E-134 | 0.5070916 | 0.297 | 0.111 | 2.91E-130 | 1.4 | SFT2D2     | 2.675675676 |
| CFLAR2         | 3.64E-134 | 0.6897727 | 0.566 | 0.312 | 8.78E-130 | 1.4 | CFLAR      | 1.814102564 |
| RPS133         | 3.76E-134 | 0.6790416 | 0.869 | 0.682 | 9.07E-130 | 1.4 | RPS13      | 1.274193548 |
| LRP1B1         | 7.27E-134 | 1.082953  | 0.321 | 0.134 | 1.75E-129 | 1.4 | LRP1B      | 2.395522388 |
| MFGE82         | 1.46E-133 | 0.6863544 | 0.237 | 0.078 | 3.51E-129 | 1.4 | MFGE8      | 3.038461538 |
| WTAP3          | 1.51E-132 | 0.6652052 | 0.734 | 0.486 | 3.63E-128 | 1.4 | WTAP       | 1.510288066 |
| STAC21         | 4.30E-132 | 0.3396203 | 0.098 | 0.015 | 1.04E-127 | 1.4 | STAC2      | 6.533333333 |
| LGALS21        | 1.14E-131 | 0.3440406 | 0.083 | 0.01  | 2.74E-127 | 1.4 | LGALS2     | 8.3         |
| ARHGEF103      | 2.52E-131 | 0.5868167 | 0.418 | 0.194 | 6.07E-127 | 1.4 | ARHGEF10   | 2.154639175 |
| SGCZ           | 1.06E-130 | 0.6534617 | 0.173 | 0.046 | 2.57E-126 | 1.4 | SGCZ       | 3.760869565 |
| AUTS21         | 3.36E-130 | 0.6076227 | 0.757 | 0.5   | 8.11E-126 | 1.4 | AUTS2      | 1.514       |
| FOXN31         | 9.34E-130 | 0.5966605 | 0.361 | 0.157 | 2.25E-125 | 1.4 | FOXN3      | 2.299363057 |
| CAMK2D3        | 1.19E-129 | 0.5973968 | 0.356 | 0.151 | 2.87E-125 | 1.4 | CAMK2D     | 2.357615894 |
| SASH13         | 1.37E-129 | 0.4886183 | 0.337 | 0.136 | 3.30E-125 | 1.4 | SASH1      | 2.477941176 |

|                |           |           |       |       |           |     |           |             |
|----------------|-----------|-----------|-------|-------|-----------|-----|-----------|-------------|
| TSHZ23         | 1.65E-129 | 0.5704144 | 0.461 | 0.223 | 3.98E-125 | 1.4 | TSHZ2     | 2.067264574 |
| NFKBIZ3        | 2.19E-129 | 0.4991793 | 0.803 | 0.528 | 5.29E-125 | 1.4 | NFKBIZ    | 1.520833333 |
| CCL5           | 5.60E-129 | 0.3005079 | 0.067 | 0.006 | 1.35E-124 | 1.4 | CCL5      | 11.16666667 |
| TPT1-AS13      | 8.01E-129 | 0.5299548 | 0.441 | 0.208 | 1.93E-124 | 1.4 | TPT1-AS1  | 2.120192308 |
| KCNQ31         | 1.01E-128 | 0.4305678 | 0.112 | 0.02  | 2.43E-124 | 1.4 | KCNQ3     | 5.6         |
| RNF1453        | 1.45E-128 | 0.4241607 | 0.582 | 0.307 | 3.50E-124 | 1.4 | RNF145    | 1.895765472 |
| NUB12          | 1.83E-128 | 0.7464519 | 0.374 | 0.169 | 4.42E-124 | 1.4 | NUB1      | 2.213017751 |
| P3H23          | 2.31E-128 | 0.5101407 | 0.186 | 0.052 | 5.57E-124 | 1.4 | P3H2      | 3.576923077 |
| LINC01344      | 1.99E-126 | 0.3906075 | 0.119 | 0.023 | 4.80E-122 | 1.4 | LINC01344 | 5.173913043 |
| CTC-340D7.11   | 1.13E-125 | 0.2308032 | 0.071 | 0.008 | 2.73E-121 | 1.4 | CTC-340D7 | 8.875       |
| BCL11A1        | 3.80E-125 | 0.3172128 | 0.115 | 0.022 | 9.15E-121 | 1.4 | BCL11A    | 5.227272727 |
| GPHN1          | 6.89E-125 | 0.531473  | 0.442 | 0.212 | 1.66E-120 | 1.4 | GPHN      | 2.08490566  |
| NACA4          | 8.69E-125 | 0.413578  | 0.953 | 0.903 | 2.10E-120 | 1.4 | NACA      | 1.055370986 |
| LINC011831     | 1.42E-124 | 0.3340146 | 0.114 | 0.022 | 3.42E-120 | 1.4 | LINC01183 | 5.181818182 |
| TRIM562        | 1.56E-124 | 0.5511431 | 0.32  | 0.133 | 3.75E-120 | 1.4 | TRIM56    | 2.406015038 |
| KIAA12171      | 1.78E-124 | 0.5853366 | 0.932 | 0.785 | 4.30E-120 | 1.4 | KIAA1217  | 1.187261146 |
| SPDYE22        | 2.60E-123 | 0.4567195 | 0.29  | 0.113 | 6.27E-119 | 1.4 | SPDYE2    | 2.566371681 |
| DAPP13         | 1.03E-122 | 0.5005317 | 0.449 | 0.216 | 2.48E-118 | 1.4 | DAPP1     | 2.078703704 |
| SLC47A13       | 1.22E-122 | 0.453157  | 0.932 | 0.891 | 2.94E-118 | 1.4 | SLC47A1   | 1.046015713 |
| HSD17B21       | 1.24E-122 | 0.3407667 | 0.137 | 0.031 | 3.00E-118 | 1.4 | HSD17B2   | 4.419354839 |
| GABPB1-AS12    | 1.26E-122 | 0.4776355 | 0.301 | 0.12  | 3.04E-118 | 1.4 | GABPB1-AS | 2.508333333 |
| GSAP2          | 1.32E-122 | 0.4503079 | 0.224 | 0.074 | 3.19E-118 | 1.4 | GSAP      | 3.027027027 |
| IFNAR22        | 7.50E-122 | 0.5180143 | 0.381 | 0.173 | 1.81E-117 | 1.4 | IFNAR2    | 2.202312139 |
| RPS203         | 7.98E-122 | 0.5341434 | 0.958 | 0.92  | 1.92E-117 | 1.4 | RPS20     | 1.041304348 |
| RPS3A3         | 1.29E-121 | 0.444836  | 0.942 | 0.893 | 3.11E-117 | 1.4 | RPS3A     | 1.054871221 |
| RP11-142M10.21 | 3.72E-121 | 0.2362386 | 0.065 | 0.006 | 8.96E-117 | 1.4 | RP11-142M | 10.83333333 |
| TMCO41         | 6.34E-121 | 0.4003632 | 0.184 | 0.053 | 1.53E-116 | 1.4 | TMCO4     | 3.471698113 |
| S100A91        | 1.25E-120 | 0.7458288 | 0.115 | 0.023 | 3.01E-116 | 1.4 | S100A9    | 5           |
| ST3GAL62       | 2.63E-120 | 0.3885004 | 0.176 | 0.05  | 6.35E-116 | 1.4 | ST3GAL6   | 3.52        |
| CCDC141        | 5.72E-120 | 0.4213933 | 0.236 | 0.082 | 1.38E-115 | 1.4 | CCDC14    | 2.87804878  |
| FHIT           | 1.27E-119 | 0.6980234 | 0.57  | 0.33  | 3.05E-115 | 1.4 | FHIT      | 1.727272727 |
| LPL1           | 1.90E-119 | 0.3016529 | 0.102 | 0.018 | 4.57E-115 | 1.4 | LPL       | 5.666666667 |
| OOEP3          | 1.93E-118 | 0.4549553 | 0.969 | 0.965 | 4.66E-114 | 1.4 | OOEP      | 1.004145078 |
| RPS15A3        | 2.13E-118 | 0.4280869 | 0.96  | 0.939 | 5.15E-114 | 1.4 | RPS15A    | 1.022364217 |
| PLA2G4A1       | 3.39E-118 | 0.2563809 | 0.093 | 0.015 | 8.17E-114 | 1.4 | PLA2G4A   | 6.2         |
| IGFBP7         | 5.48E-118 | 0.2961525 | 0.063 | 0.006 | 1.32E-113 | 1.4 | IGFBP7    | 10.5        |
| RPL343         | 5.70E-118 | 0.3981015 | 0.975 | 0.979 | 1.37E-113 | 1.4 | RPL34     | 0.995914198 |
| IKBKE1         | 2.82E-117 | 0.2709608 | 0.091 | 0.015 | 6.80E-113 | 1.4 | IKBKE     | 6.066666667 |
| ZNHIT61        | 4.22E-117 | 0.556785  | 0.31  | 0.13  | 1.02E-112 | 1.4 | ZNHIT6    | 2.384615385 |
| MGC32805       | 1.01E-116 | 0.2021205 | 0.063 | 0.006 | 2.44E-112 | 1.4 | MGC32805  | 10.5        |
| RPS243         | 1.12E-116 | 0.355248  | 0.975 | 0.965 | 2.69E-112 | 1.4 | RPS24     | 1.010362694 |
| METAP22        | 1.57E-116 | 0.5088069 | 0.439 | 0.22  | 3.80E-112 | 1.4 | METAP2    | 1.995454545 |
| LINC014821     | 6.26E-116 | 0.2934358 | 0.076 | 0.01  | 1.51E-111 | 1.4 | LINC01482 | 7.6         |
| RP11-37B2.11   | 1.19E-115 | 0.5815358 | 0.418 | 0.202 | 2.87E-111 | 1.4 | RP11-37B2 | 2.069306931 |
| ATL21          | 1.84E-115 | 0.5856874 | 0.414 | 0.203 | 4.45E-111 | 1.4 | ATL2      | 2.039408867 |
| BPGM2          | 6.19E-115 | 0.4781436 | 0.217 | 0.074 | 1.49E-110 | 1.4 | BPGM      | 2.932432432 |
| TOMM73         | 7.06E-115 | 0.4332808 | 0.918 | 0.803 | 1.70E-110 | 1.4 | TOMM7     | 1.143212951 |
| FAM78B2        | 8.81E-115 | 0.3332134 | 0.117 | 0.025 | 2.12E-110 | 1.4 | FAM78B    | 4.68        |
| KCNQ11         | 2.08E-114 | 0.4003799 | 0.17  | 0.049 | 5.02E-110 | 1.4 | KCNQ1     | 3.469387755 |
| EIF3L3         | 4.51E-114 | 0.5106783 | 0.782 | 0.564 | 1.09E-109 | 1.4 | EIF3L     | 1.386524823 |
| RPS123         | 7.17E-114 | 0.7373751 | 0.785 | 0.632 | 1.73E-109 | 1.4 | RPS12     | 1.242088608 |
| DPYD1          | 7.75E-114 | 0.5188084 | 0.755 | 0.49  | 1.87E-109 | 1.4 | DPYD      | 1.540816327 |

|                   |           |           |       |       |           |     |           |             |
|-------------------|-----------|-----------|-------|-------|-----------|-----|-----------|-------------|
| TBC1D3P1-DHX40P13 | 1.24E-112 | 0.5998175 | 0.776 | 0.565 | 2.99E-108 | 1.4 | TBC1D3P1- | 1.373451327 |
| ZNF1241           | 1.54E-112 | 0.3663146 | 0.155 | 0.042 | 3.70E-108 | 1.4 | ZNF124    | 3.69047619  |
| LDHB3             | 2.14E-112 | 0.4447915 | 0.78  | 0.536 | 5.16E-108 | 1.4 | LDHB      | 1.455223881 |
| GPRC5B2           | 9.78E-112 | 0.3239868 | 0.112 | 0.023 | 2.36E-107 | 1.4 | GPRC5B    | 4.869565217 |
| DIMT11            | 1.55E-111 | 0.2923919 | 0.125 | 0.029 | 3.74E-107 | 1.4 | DIMT1     | 4.310344828 |
| NPM13             | 2.18E-111 | 0.4200079 | 0.893 | 0.691 | 5.27E-107 | 1.4 | NPM1      | 1.292329957 |
| BAIAP2L13         | 8.16E-111 | 0.6033742 | 0.96  | 0.922 | 1.97E-106 | 1.4 | BAIAP2L1  | 1.041214751 |
| FAAH21            | 9.41E-111 | 0.5465683 | 0.385 | 0.183 | 2.27E-106 | 1.4 | FAAH2     | 2.103825137 |
| CYP1B1-AS11       | 9.59E-111 | 0.283663  | 0.098 | 0.018 | 2.31E-106 | 1.4 | CYP1B1-AS | 5.444444444 |
| TLR11             | 1.62E-110 | 0.3141304 | 0.107 | 0.021 | 3.91E-106 | 1.4 | TLR1      | 5.095238095 |
| RGS102            | 3.60E-110 | 0.3763141 | 0.171 | 0.051 | 8.69E-106 | 1.4 | RGS10     | 3.352941176 |
| SLC30A42          | 4.11E-110 | 0.4752684 | 0.237 | 0.087 | 9.91E-106 | 1.4 | SLC30A4   | 2.724137931 |
| RPS253            | 5.09E-110 | 0.5855685 | 0.872 | 0.722 | 1.23E-105 | 1.4 | RPS25     | 1.207756233 |
| ZMYM43            | 1.32E-109 | 0.448081  | 0.904 | 0.805 | 3.19E-105 | 1.4 | ZMYM4     | 1.122981366 |
| GBP23             | 2.67E-109 | 0.4854758 | 0.808 | 0.59  | 6.43E-105 | 1.4 | GBP2      | 1.369491525 |
| SLC16A1-AS12      | 2.80E-109 | 0.4094542 | 0.176 | 0.054 | 6.75E-105 | 1.4 | SLC16A1-A | 3.259259259 |
| DARS1             | 3.90E-109 | 0.5068917 | 0.438 | 0.224 | 9.41E-105 | 1.4 | DARS      | 1.955357143 |
| R3HDM21           | 1.49E-108 | 0.4959511 | 0.258 | 0.101 | 3.58E-104 | 1.4 | R3HDM2    | 2.554455446 |
| CECR72            | 2.08E-108 | 0.3152547 | 0.134 | 0.033 | 5.01E-104 | 1.4 | CECR7     | 4.060606061 |
| RP11-475O6.1      | 4.28E-108 | 0.3815318 | 0.12  | 0.027 | 1.03E-103 | 1.4 | RP11-475O | 4.444444444 |
| AC027119.11       | 4.49E-108 | 0.1850611 | 0.052 | 0.004 | 1.08E-103 | 1.4 | AC027119. | 13          |
| PLEKHA63          | 5.08E-108 | 0.4351781 | 0.916 | 0.822 | 1.22E-103 | 1.4 | PLEKHA6   | 1.114355231 |
| LRIG31            | 5.24E-108 | 0.2629909 | 0.101 | 0.02  | 1.26E-103 | 1.4 | LRIG3     | 5.05        |
| JARID2            | 8.02E-108 | 0.4420928 | 0.44  | 0.229 | 1.93E-103 | 1.4 | JARID2    | 1.92139738  |
| NT5C22            | 1.00E-107 | 0.5367123 | 0.462 | 0.245 | 2.42E-103 | 1.4 | NT5C2     | 1.885714286 |
| PI32              | 1.03E-107 | 0.4609446 | 0.304 | 0.127 | 2.49E-103 | 1.4 | PI3       | 2.393700787 |
| FTH12             | 1.14E-107 | 0.5415806 | 0.939 | 0.832 | 2.75E-103 | 1.4 | FTH1      | 1.128605769 |
| DIAPH21           | 3.81E-107 | 0.5607771 | 0.373 | 0.179 | 9.18E-103 | 1.4 | DIAPH2    | 2.083798883 |
| RP11-608O21.13    | 4.44E-107 | 0.5591792 | 0.739 | 0.512 | 1.07E-102 | 1.4 | RP11-608O | 1.443359375 |
| SNED11            | 7.93E-107 | 0.3055161 | 0.111 | 0.024 | 1.91E-102 | 1.4 | SNED1     | 4.625       |
| RCAN13            | 9.60E-107 | 0.6064433 | 0.607 | 0.369 | 2.32E-102 | 1.4 | RCAN1     | 1.64498645  |
| CATSPER21         | 9.91E-107 | 0.3355716 | 0.158 | 0.045 | 2.39E-102 | 1.4 | CATSPER2  | 3.511111111 |
| RPL7A3            | 2.34E-106 | 0.3618762 | 0.967 | 0.957 | 5.64E-102 | 1.4 | RPL7A     | 1.010449321 |
| ZRANB22           | 3.13E-106 | 0.4910147 | 0.416 | 0.208 | 7.55E-102 | 1.4 | ZRANB2    | 2           |
| SIK2              | 4.13E-106 | 0.5674733 | 0.526 | 0.3   | 9.97E-102 | 1.4 | SIK2      | 1.753333333 |
| BDNF-AS3          | 7.91E-106 | 0.6342306 | 0.703 | 0.481 | 1.91E-101 | 1.4 | BDNF-AS   | 1.461538462 |
| NPAS22            | 2.28E-105 | 0.5934929 | 0.583 | 0.346 | 5.49E-101 | 1.4 | NPAS2     | 1.684971098 |
| DRAM21            | 4.10E-105 | 0.4730972 | 0.395 | 0.194 | 9.89E-101 | 1.4 | DRAM2     | 2.036082474 |
| ADGRL22           | 4.61E-105 | 0.5280762 | 0.195 | 0.065 | 1.11E-100 | 1.4 | ADGRL2    | 3           |
| ZNF1952           | 2.21E-104 | 0.3993668 | 0.187 | 0.061 | 5.34E-100 | 1.4 | ZNF195    | 3.06557377  |
| COA11             | 4.74E-104 | 0.4723858 | 0.395 | 0.195 | 1.14E-99  | 1.4 | COA1      | 2.025641026 |
| RPL23A3           | 5.41E-104 | 0.6348322 | 0.745 | 0.554 | 1.31E-99  | 1.4 | RPL23A    | 1.344765343 |
| CISD13            | 1.03E-103 | 0.4045681 | 0.28  | 0.115 | 2.49E-99  | 1.4 | CISD1     | 2.434782609 |
| GANC1             | 1.52E-103 | 0.3987923 | 0.202 | 0.07  | 3.67E-99  | 1.4 | GANC      | 2.885714286 |
| CH17-189H20.11    | 1.63E-103 | 0.4315066 | 0.216 | 0.078 | 3.94E-99  | 1.4 | CH17-189H | 2.769230769 |
| CSF11             | 1.79E-103 | 0.4448082 | 0.157 | 0.046 | 4.30E-99  | 1.4 | CSF1      | 3.413043478 |
| MRAS1             | 2.14E-103 | 0.2884476 | 0.117 | 0.027 | 5.16E-99  | 1.4 | MRAS      | 4.333333333 |
| RTP43             | 2.98E-103 | 0.2872685 | 0.13  | 0.033 | 7.19E-99  | 1.4 | RTP4      | 3.939393939 |
| AKR1C21           | 3.20E-103 | 0.3226259 | 0.131 | 0.033 | 7.72E-99  | 1.4 | AKR1C2    | 3.96969697  |
| AC073283.41       | 7.63E-103 | 0.3694945 | 0.176 | 0.056 | 1.84E-98  | 1.4 | AC073283. | 3.142857143 |
| CYP27A11          | 9.62E-103 | 0.3631865 | 0.162 | 0.048 | 2.32E-98  | 1.4 | CYP27A1   | 3.375       |
| SPIRE13           | 1.60E-102 | 0.5437041 | 0.439 | 0.229 | 3.87E-98  | 1.4 | SPIRE1    | 1.917030568 |



|                 |           |           |       |       |          |     |           |             |
|-----------------|-----------|-----------|-------|-------|----------|-----|-----------|-------------|
| CYP27B11        | 1.83E-102 | 0.2630266 | 0.091 | 0.017 | 4.41E-98 | 1.4 | CYP27B1   | 5.352941176 |
| KALRN1          | 1.90E-102 | 0.4141854 | 0.203 | 0.07  | 4.59E-98 | 1.4 | KALRN     | 2.9         |
| RPLP03          | 5.95E-102 | 0.6164275 | 0.919 | 0.86  | 1.44E-97 | 1.4 | RPLP0     | 1.068604651 |
| RBP51           | 8.11E-102 | 0.2254192 | 0.088 | 0.016 | 1.96E-97 | 1.4 | RBP5      | 5.5         |
| HGSNAT1         | 9.59E-102 | 0.4804473 | 0.277 | 0.116 | 2.31E-97 | 1.4 | HGSNAT    | 2.387931034 |
| FANCL1          | 1.65E-101 | 0.2994882 | 0.138 | 0.037 | 3.98E-97 | 1.4 | FANCL     | 3.72972973  |
| ATP13A52        | 1.85E-101 | 0.3446744 | 0.089 | 0.016 | 4.46E-97 | 1.4 | ATP13A5   | 5.5625      |
| MECOM3          | 5.47E-101 | 0.4720671 | 0.899 | 0.792 | 1.32E-96 | 1.4 | MECOM     | 1.13510101  |
| EIF3E3          | 1.26E-100 | 0.4280058 | 0.78  | 0.549 | 3.04E-96 | 1.4 | EIF3E     | 1.420765027 |
| NTRK22          | 2.52E-100 | 0.4259348 | 0.23  | 0.086 | 6.08E-96 | 1.4 | NTRK2     | 2.674418605 |
| SLCO1A21        | 1.87E-99  | 0.2219165 | 0.063 | 0.008 | 4.52E-95 | 1.4 | SLCO1A2   | 7.875       |
| HCAR22          | 5.99E-99  | 0.3317693 | 0.232 | 0.087 | 1.44E-94 | 1.4 | HCAR2     | 2.666666667 |
| RP11-867G2.81   | 6.09E-99  | 0.2557452 | 0.078 | 0.013 | 1.47E-94 | 1.4 | RP11-867G | 6           |
| ZNF222          | 6.31E-99  | 0.4395924 | 0.318 | 0.144 | 1.52E-94 | 1.4 | ZNF22     | 2.208333333 |
| C1orf1471       | 7.92E-99  | 0.2191961 | 0.071 | 0.011 | 1.91E-94 | 1.4 | C1orf147  | 6.454545455 |
| TTLL42          | 9.78E-99  | 0.4197317 | 0.246 | 0.098 | 2.36E-94 | 1.4 | TTLL4     | 2.510204082 |
| RPS4X3          | 2.01E-98  | 0.3265642 | 0.973 | 0.98  | 4.86E-94 | 1.4 | RPS4X     | 0.992857143 |
| SNCAIP          | 4.27E-98  | 0.2730104 | 0.07  | 0.01  | 1.03E-93 | 1.4 | SNCAIP    | 7           |
| PFDN43          | 4.28E-98  | 0.4287552 | 0.541 | 0.31  | 1.03E-93 | 1.4 | PFDN4     | 1.74516129  |
| MUC162          | 4.51E-98  | 0.3074261 | 0.091 | 0.018 | 1.09E-93 | 1.4 | MUC16     | 5.055555556 |
| DAPK13          | 7.01E-98  | 0.6302371 | 0.706 | 0.512 | 1.69E-93 | 1.4 | DAPK1     | 1.37890625  |
| HSD17B71        | 1.28E-97  | 0.4357191 | 0.205 | 0.074 | 3.09E-93 | 1.4 | HSD17B7   | 2.77027027  |
| MCTP22          | 1.80E-97  | 0.4164741 | 0.212 | 0.078 | 4.33E-93 | 1.4 | MCTP2     | 2.717948718 |
| EHF2            | 4.15E-97  | 0.4866957 | 0.68  | 0.448 | 1.00E-92 | 1.4 | EHF       | 1.517857143 |
| TRIM221         | 9.02E-97  | 0.3515254 | 0.181 | 0.06  | 2.17E-92 | 1.4 | TRIM22    | 3.016666667 |
| MAGI21          | 1.19E-96  | 0.5024189 | 0.158 | 0.049 | 2.87E-92 | 1.4 | MAGI2     | 3.224489796 |
| BCAS33          | 2.29E-96  | 0.4118946 | 0.87  | 0.722 | 5.52E-92 | 1.4 | BCAS3     | 1.20498615  |
| C11orf801       | 2.57E-96  | 0.4805593 | 0.347 | 0.166 | 6.19E-92 | 1.4 | C11orf80  | 2.090361446 |
| VPS13D1         | 3.10E-96  | 0.4883677 | 0.463 | 0.254 | 7.47E-92 | 1.4 | VPS13D    | 1.822834646 |
| C21orf911       | 8.00E-96  | 0.2932414 | 0.122 | 0.031 | 1.93E-91 | 1.4 | C21orf91  | 3.935483871 |
| CTB-113D17.1    | 1.34E-95  | 0.1502152 | 0.043 | 0.003 | 3.24E-91 | 1.4 | CTB-113D1 | 14.33333333 |
| SCAPER2         | 1.81E-95  | 0.453147  | 0.311 | 0.142 | 4.35E-91 | 1.4 | SCAPER    | 2.190140845 |
| RPS173          | 4.62E-95  | 0.345541  | 0.952 | 0.94  | 1.11E-90 | 1.4 | RPS17     | 1.012765957 |
| CNTNAP31        | 1.52E-94  | 0.3067735 | 0.102 | 0.023 | 3.66E-90 | 1.4 | CNTNAP3   | 4.434782609 |
| PKD21           | 3.26E-94  | 0.3437063 | 0.151 | 0.045 | 7.85E-90 | 1.4 | PKD2      | 3.355555556 |
| RPS33           | 3.92E-94  | 0.6037126 | 0.937 | 0.86  | 9.45E-90 | 1.4 | RPS3      | 1.089534884 |
| EPS83           | 7.38E-94  | 0.5574055 | 0.514 | 0.296 | 1.78E-89 | 1.4 | EPS8      | 1.736486486 |
| CCDC1462        | 1.18E-93  | 0.497022  | 0.277 | 0.121 | 2.85E-89 | 1.4 | CCDC146   | 2.289256198 |
| IDO1            | 1.22E-93  | 0.5939788 | 0.091 | 0.019 | 2.94E-89 | 1.4 | IDO1      | 4.789473684 |
| RP11-1069G10.11 | 1.84E-93  | 0.1943196 | 0.067 | 0.01  | 4.43E-89 | 1.4 | RP11-1069 | 6.7         |
| DISC11          | 4.98E-93  | 0.394252  | 0.192 | 0.068 | 1.20E-88 | 1.4 | DISC1     | 2.823529412 |
| RARRES31        | 7.65E-93  | 0.4524021 | 0.39  | 0.197 | 1.84E-88 | 1.4 | RARRES3   | 1.979695431 |
| ZNF33A1         | 2.95E-92  | 0.435623  | 0.385 | 0.195 | 7.11E-88 | 1.4 | ZNF33A    | 1.974358974 |
| ISLR            | 6.47E-92  | 0.134301  | 0.042 | 0.003 | 1.56E-87 | 1.4 | ISLR      | 14          |
| TBC1D51         | 9.44E-92  | 0.5261419 | 0.547 | 0.329 | 2.28E-87 | 1.4 | TBC1D5    | 1.662613982 |
| TMEM176B1       | 1.04E-91  | 0.2435924 | 0.091 | 0.019 | 2.52E-87 | 1.4 | TMEM176B  | 4.789473684 |
| CFB             | 1.28E-91  | 0.34143   | 0.303 | 0.136 | 3.08E-87 | 1.4 | CFB       | 2.227941176 |
| PELI22          | 2.95E-91  | 0.3523691 | 0.139 | 0.041 | 7.11E-87 | 1.4 | PELI2     | 3.390243902 |
| THUMPD3-AS12    | 9.58E-91  | 0.4123675 | 0.396 | 0.203 | 2.31E-86 | 1.4 | THUMPD3-  | 1.950738916 |
| RHBDF22         | 9.70E-91  | 0.2532105 | 0.115 | 0.029 | 2.34E-86 | 1.4 | RHBDF2    | 3.965517241 |
| MT-ATP61        | 1.47E-90  | 0.3477464 | 0.987 | 0.991 | 3.55E-86 | 1.4 | MT-ATP6   | 0.995963673 |
| RPL413          | 1.84E-89  | 0.5923611 | 0.948 | 0.897 | 4.43E-85 | 1.4 | RPL41     | 1.056856187 |

|               |          |           |       |       |          |     |            |             |
|---------------|----------|-----------|-------|-------|----------|-----|------------|-------------|
| SYNJ22        | 1.95E-89 | 0.5194872 | 0.393 | 0.206 | 4.70E-85 | 1.4 | SYNJ2      | 1.90776699  |
| ZNF6523       | 2.05E-89 | 0.5150041 | 0.638 | 0.421 | 4.95E-85 | 1.4 | ZNF652     | 1.51543943  |
| RELB1         | 2.30E-89 | 0.4352225 | 0.272 | 0.119 | 5.55E-85 | 1.4 | RELB       | 2.285714286 |
| COBLL11       | 2.85E-89 | 0.3851002 | 0.191 | 0.069 | 6.88E-85 | 1.4 | COBLL1     | 2.768115942 |
| SMARCA2       | 6.99E-89 | 0.4780129 | 0.495 | 0.288 | 1.69E-84 | 1.4 | SMARCA2    | 1.71875     |
| WDPCP1        | 9.85E-89 | 0.4555228 | 0.249 | 0.105 | 2.37E-84 | 1.4 | WDPCP      | 2.371428571 |
| BMPR1A1       | 4.04E-88 | 0.4829727 | 0.426 | 0.23  | 9.73E-84 | 1.4 | BMPR1A     | 1.852173913 |
| IQGAP21       | 8.91E-88 | 0.2902997 | 0.129 | 0.037 | 2.15E-83 | 1.4 | IQGAP2     | 3.486486486 |
| GS1-24F4.21   | 1.72E-87 | 0.44258   | 0.163 | 0.054 | 4.16E-83 | 1.4 | GS1-24F4.2 | 3.018518519 |
| ADAMTS93      | 2.45E-87 | 0.5063343 | 0.379 | 0.191 | 5.90E-83 | 1.4 | ADAMTS9    | 1.984293194 |
| RPL313        | 2.51E-87 | 0.3539981 | 0.951 | 0.921 | 6.05E-83 | 1.4 | RPL31      | 1.03257329  |
| AC005152.32   | 3.08E-87 | 0.443565  | 0.185 | 0.067 | 7.42E-83 | 1.4 | AC005152.  | 2.76119403  |
| DANT21        | 3.29E-87 | 0.3353348 | 0.155 | 0.05  | 7.93E-83 | 1.4 | DANT2      | 3.1         |
| IL15RA2       | 4.15E-87 | 0.2827066 | 0.102 | 0.024 | 1.00E-82 | 1.4 | IL15RA     | 4.25        |
| MAMDC23       | 4.18E-87 | 0.3930762 | 0.928 | 0.84  | 1.01E-82 | 1.4 | MAMDC2     | 1.104761905 |
| XDH3          | 4.49E-87 | 0.5121947 | 0.149 | 0.047 | 1.08E-82 | 1.4 | XDH        | 3.170212766 |
| CATSPERB1     | 5.47E-87 | 0.4640534 | 0.366 | 0.184 | 1.32E-82 | 1.4 | CATSPERB   | 1.989130435 |
| CD743         | 5.86E-87 | 0.3292492 | 0.198 | 0.073 | 1.41E-82 | 1.4 | CD74       | 2.712328767 |
| RP11-244M2.13 | 9.40E-87 | 0.4773029 | 0.598 | 0.386 | 2.27E-82 | 1.4 | RP11-244M  | 1.549222798 |
| RAB291        | 1.67E-86 | 0.2518973 | 0.135 | 0.039 | 4.03E-82 | 1.4 | RAB29      | 3.461538462 |
| SAMD121       | 2.77E-86 | 0.5348262 | 0.421 | 0.229 | 6.69E-82 | 1.4 | SAMD12     | 1.838427948 |
| EPB41L11      | 6.70E-86 | 0.4100994 | 0.168 | 0.058 | 1.62E-81 | 1.4 | EPB41L1    | 2.896551724 |
| TMOD12        | 8.79E-86 | 0.3556048 | 0.179 | 0.064 | 2.12E-81 | 1.4 | TMOD1      | 2.796875    |
| ATR1          | 1.49E-85 | 0.4215884 | 0.272 | 0.122 | 3.59E-81 | 1.4 | ATR        | 2.229508197 |
| CTC-471J1.93  | 1.05E-84 | 0.5315701 | 0.788 | 0.617 | 2.52E-80 | 1.4 | CTC-471J1. | 1.277147488 |
| CTB-91J4.1    | 2.17E-84 | 0.190629  | 0.035 | 0.002 | 5.23E-80 | 1.4 | CTB-91J4.1 | 17.5        |
| MGAT31        | 5.62E-84 | 0.1545864 | 0.048 | 0.005 | 1.35E-79 | 1.4 | MGAT3      | 9.6         |
| NACA23        | 1.15E-83 | 0.4782361 | 0.647 | 0.445 | 2.78E-79 | 1.4 | NACA2      | 1.453932584 |
| NNT2          | 1.66E-83 | 0.3603791 | 0.154 | 0.051 | 4.00E-79 | 1.4 | NNT        | 3.019607843 |
| CX3CL11       | 4.34E-83 | 0.5464506 | 0.394 | 0.211 | 1.05E-78 | 1.4 | CX3CL1     | 1.867298578 |
| NCOA11        | 6.76E-83 | 0.5437304 | 0.561 | 0.357 | 1.63E-78 | 1.4 | NCOA1      | 1.571428571 |
| NXN3          | 7.38E-83 | 0.4250359 | 0.206 | 0.081 | 1.78E-78 | 1.4 | NXN        | 2.543209877 |
| BTF33         | 7.62E-83 | 0.3499434 | 0.937 | 0.882 | 1.84E-78 | 1.4 | BTF3       | 1.062358277 |
| N4BP2L21      | 1.10E-82 | 0.4011309 | 0.883 | 0.706 | 2.66E-78 | 1.4 | N4BP2L2    | 1.250708215 |
| EML52         | 1.26E-82 | 0.3520321 | 0.16  | 0.054 | 3.05E-78 | 1.4 | EML5       | 2.962962963 |
| CSTB2         | 1.28E-82 | 0.5467289 | 0.277 | 0.128 | 3.09E-78 | 1.4 | CSTB       | 2.1640625   |
| LINC009981    | 2.34E-82 | 0.3428798 | 0.26  | 0.113 | 5.65E-78 | 1.4 | LINC00998  | 2.300884956 |
| GABRG31       | 2.59E-82 | 0.2981474 | 0.087 | 0.019 | 6.24E-78 | 1.4 | GABRG3     | 4.578947368 |
| PELI13        | 3.37E-82 | 0.5206048 | 0.505 | 0.307 | 8.12E-78 | 1.4 | PELI1      | 1.64495114  |
| BTBD111       | 5.45E-82 | 0.3022152 | 0.117 | 0.032 | 1.31E-77 | 1.4 | BTBD11     | 3.65625     |
| PLCB12        | 2.20E-81 | 0.3919815 | 0.388 | 0.203 | 5.30E-77 | 1.4 | PLCB1      | 1.911330049 |
| MT-CO13       | 2.60E-81 | 0.5083414 | 0.983 | 0.993 | 6.27E-77 | 1.4 | MT-CO1     | 0.989929507 |
| NUDT71        | 5.62E-81 | 0.2091271 | 0.09  | 0.02  | 1.36E-76 | 1.4 | NUDT7      | 4.5         |
| LINC005361    | 7.60E-81 | 0.3585603 | 0.149 | 0.049 | 1.83E-76 | 1.4 | LINC00536  | 3.040816327 |
| NSD11         | 1.35E-80 | 0.4016177 | 0.251 | 0.111 | 3.26E-76 | 1.4 | NSD1       | 2.261261261 |
| TNFSF101      | 1.38E-80 | 0.2282368 | 0.686 | 0.446 | 3.34E-76 | 1.4 | TNFSF10    | 1.538116592 |
| ATP6V1B22     | 1.40E-80 | 0.3706671 | 0.19  | 0.073 | 3.37E-76 | 1.4 | ATP6V1B2   | 2.602739726 |
| RPL193        | 1.68E-80 | 0.5460871 | 0.942 | 0.897 | 4.06E-76 | 1.4 | RPL19      | 1.050167224 |
| HRSP121       | 2.10E-80 | 0.3220471 | 0.169 | 0.06  | 5.07E-76 | 1.4 | HRSP12     | 2.816666667 |
| CNTNAP3B2     | 3.60E-80 | 0.3337151 | 0.152 | 0.051 | 8.68E-76 | 1.4 | CNTNAP3B   | 2.980392157 |
| FOXO12        | 4.41E-80 | 0.4222972 | 0.343 | 0.175 | 1.06E-75 | 1.4 | FOXO1      | 1.96        |
| MARK11        | 6.59E-80 | 0.3203217 | 0.157 | 0.053 | 1.59E-75 | 1.4 | MARK1      | 2.962264151 |

|                |          |           |       |       |          |     |            |             |
|----------------|----------|-----------|-------|-------|----------|-----|------------|-------------|
| HSPD13         | 3.46E-79 | 0.4233667 | 0.418 | 0.233 | 8.35E-75 | 1.4 | HSPD1      | 1.793991416 |
| BPI1           | 4.89E-79 | 0.2127672 | 0.077 | 0.016 | 1.18E-74 | 1.4 | BPI        | 4.8125      |
| FLOT21         | 5.23E-79 | 0.27974   | 0.106 | 0.028 | 1.26E-74 | 1.4 | FLOT2      | 3.785714286 |
| TC2N2          | 8.21E-79 | 0.5120675 | 0.454 | 0.263 | 1.98E-74 | 1.4 | TC2N       | 1.726235741 |
| CXCL172        | 1.49E-78 | 0.4526196 | 0.215 | 0.089 | 3.59E-74 | 1.4 | CXCL17     | 2.415730337 |
| RPL223         | 1.98E-78 | 0.3671185 | 0.816 | 0.631 | 4.78E-74 | 1.4 | RPL22      | 1.29318542  |
| ZNF4291        | 2.43E-78 | 0.3104956 | 0.155 | 0.053 | 5.86E-74 | 1.4 | ZNF429     | 2.924528302 |
| ANTXR11        | 5.59E-78 | 0.2670703 | 0.103 | 0.027 | 1.35E-73 | 1.4 | ANTXR1     | 3.814814815 |
| RPL233         | 7.67E-78 | 0.3224137 | 0.961 | 0.91  | 1.85E-73 | 1.4 | RPL23      | 1.056043956 |
| TPM12          | 1.73E-77 | 0.4950929 | 0.693 | 0.505 | 4.18E-73 | 1.4 | TPM1       | 1.372277228 |
| MOB41          | 2.31E-77 | 0.3770209 | 0.292 | 0.14  | 5.58E-73 | 1.4 | MOB4       | 2.085714286 |
| AKAP61         | 6.71E-77 | 0.2723112 | 0.096 | 0.024 | 1.62E-72 | 1.4 | AKAP6      | 4           |
| FTX1           | 9.07E-77 | 0.4692047 | 0.755 | 0.532 | 2.19E-72 | 1.4 | FTX        | 1.419172932 |
| RNF1752        | 1.20E-76 | 0.2805593 | 0.093 | 0.023 | 2.90E-72 | 1.4 | RNF175     | 4.043478261 |
| STX171         | 1.80E-76 | 0.3211718 | 0.239 | 0.104 | 4.34E-72 | 1.4 | STX17      | 2.298076923 |
| MT-ND22        | 1.87E-76 | 0.3161022 | 0.977 | 0.977 | 4.51E-72 | 1.4 | MT-ND2     | 1           |
| UQCRH3         | 2.31E-76 | 0.3708022 | 0.85  | 0.736 | 5.57E-72 | 1.4 | UQCRH      | 1.154891304 |
| RP11-66B24.11  | 2.93E-76 | 0.1717554 | 0.062 | 0.011 | 7.07E-72 | 1.4 | RP11-66B2  | 5.636363636 |
| MARCKS3        | 4.42E-76 | 0.4898362 | 0.526 | 0.329 | 1.07E-71 | 1.4 | MARCKS     | 1.598784195 |
| TRAF3IP22      | 5.63E-76 | 0.3830835 | 0.248 | 0.111 | 1.36E-71 | 1.4 | TRAF3IP2   | 2.234234234 |
| CACHD11        | 9.89E-76 | 0.3123229 | 0.13  | 0.041 | 2.39E-71 | 1.4 | CACHD1     | 3.170731707 |
| FGFR21         | 1.21E-75 | 0.2469718 | 0.079 | 0.017 | 2.93E-71 | 1.4 | FGFR2      | 4.647058824 |
| HDAC92         | 1.36E-75 | 0.4870282 | 0.241 | 0.108 | 3.28E-71 | 1.4 | HDAC9      | 2.231481481 |
| PAM2           | 3.42E-75 | 0.4313927 | 0.657 | 0.443 | 8.24E-71 | 1.4 | PAM        | 1.483069977 |
| PPP1R14C3      | 4.42E-75 | 0.3463433 | 0.205 | 0.084 | 1.07E-70 | 1.4 | PPP1R14C   | 2.44047619  |
| SDCCAG81       | 4.97E-75 | 0.4275888 | 0.279 | 0.133 | 1.20E-70 | 1.4 | SDCCAG8    | 2.097744361 |
| DBI2           | 5.69E-75 | 0.472875  | 0.799 | 0.636 | 1.37E-70 | 1.4 | DBI        | 1.256289308 |
| TFAP2C2        | 5.72E-75 | 0.3346993 | 0.183 | 0.071 | 1.38E-70 | 1.4 | TFAP2C     | 2.577464789 |
| C5orf282       | 8.86E-75 | 0.3766242 | 0.249 | 0.113 | 2.14E-70 | 1.4 | C5orf28    | 2.203539823 |
| RP11-318C2.11  | 9.19E-75 | 0.2395969 | 0.099 | 0.026 | 2.22E-70 | 1.4 | RP11-318C  | 3.807692308 |
| SLC1A31        | 1.06E-74 | 0.2194065 | 0.09  | 0.022 | 2.57E-70 | 1.4 | SLC1A3     | 4.090909091 |
| TEX143         | 1.37E-74 | 0.4714734 | 0.279 | 0.134 | 3.30E-70 | 1.4 | TEX14      | 2.082089552 |
| C21orf62-AS11  | 1.64E-74 | 0.17989   | 0.07  | 0.014 | 3.95E-70 | 1.4 | C21orf62-A | 5           |
| EHBP12         | 2.69E-74 | 0.4496649 | 0.4   | 0.224 | 6.48E-70 | 1.4 | EHBP1      | 1.785714286 |
| GMDS-AS11      | 3.01E-74 | 0.4975351 | 0.224 | 0.097 | 7.26E-70 | 1.4 | GMDS-AS1   | 2.309278351 |
| TACC12         | 6.81E-74 | 0.5202897 | 0.3   | 0.152 | 1.64E-69 | 1.4 | TACC1      | 1.973684211 |
| PARP42         | 9.34E-74 | 0.3800036 | 0.283 | 0.137 | 2.25E-69 | 1.4 | PARP4      | 2.065693431 |
| ZNF5622        | 1.26E-73 | 0.3742253 | 0.288 | 0.141 | 3.04E-69 | 1.4 | ZNF562     | 2.042553191 |
| FAM3B1         | 1.53E-73 | 0.2471757 | 0.116 | 0.035 | 3.68E-69 | 1.4 | FAM3B      | 3.314285714 |
| HIVEP31        | 4.15E-73 | 0.5569064 | 0.484 | 0.296 | 1.00E-68 | 1.4 | HIVEP3     | 1.635135135 |
| RPS210         | 5.24E-73 | 0.5425857 | 0.434 | 0.255 | 1.26E-68 | 1.4 | RPS2       | 1.701960784 |
| IMMP2L1        | 5.74E-73 | 0.5152268 | 0.457 | 0.274 | 1.38E-68 | 1.4 | IMMP2L     | 1.667883212 |
| EGF1           | 7.14E-73 | 0.2769108 | 0.109 | 0.031 | 1.72E-68 | 1.4 | EGF        | 3.516129032 |
| VNN21          | 8.34E-73 | 0.2043484 | 0.065 | 0.012 | 2.01E-68 | 1.4 | VNN2       | 5.416666667 |
| ENTPD1-AS11    | 9.70E-73 | 0.2967383 | 0.131 | 0.043 | 2.34E-68 | 1.4 | ENTPD1-AS  | 3.046511628 |
| FAF11          | 1.22E-72 | 0.4468091 | 0.384 | 0.213 | 2.93E-68 | 1.4 | FAF1       | 1.802816901 |
| SPDYE162       | 1.35E-72 | 0.2887743 | 0.148 | 0.052 | 3.26E-68 | 1.4 | SPDYE16    | 2.846153846 |
| RP11-817J15.23 | 1.88E-72 | 0.2523428 | 0.131 | 0.042 | 4.53E-68 | 1.4 | RP11-817J1 | 3.119047619 |
| LINC004863     | 2.13E-72 | 0.2646523 | 0.997 | 0.986 | 5.14E-68 | 1.4 | LINC00486  | 1.011156187 |
| PRDM12         | 2.73E-72 | 0.22564   | 0.096 | 0.025 | 6.58E-68 | 1.4 | PRDM1      | 3.84        |
| TBCA3          | 3.08E-72 | 0.394727  | 0.714 | 0.522 | 7.44E-68 | 1.4 | TBCA       | 1.367816092 |
| IDH21          | 5.96E-72 | 0.3264776 | 0.173 | 0.067 | 1.44E-67 | 1.4 | IDH2       | 2.582089552 |

|            |          |           |       |       |          |     |           |             |
|------------|----------|-----------|-------|-------|----------|-----|-----------|-------------|
| SMC53      | 8.49E-72 | 0.4227528 | 0.473 | 0.284 | 2.05E-67 | 1.4 | SMC5      | 1.665492958 |
| INSR3      | 9.14E-72 | 0.472473  | 0.717 | 0.534 | 2.20E-67 | 1.4 | INSR      | 1.342696629 |
| CRTC31     | 2.17E-71 | 0.3968951 | 0.355 | 0.191 | 5.23E-67 | 1.4 | CRTC3     | 1.858638743 |
| RASSF41    | 3.44E-71 | 0.1434502 | 0.054 | 0.008 | 8.29E-67 | 1.4 | RASSF4    | 6.75        |
| NFIX2      | 3.77E-71 | 0.3875848 | 0.154 | 0.056 | 9.09E-67 | 1.4 | NFIX      | 2.75        |
| UGGT21     | 3.80E-71 | 0.5124966 | 0.271 | 0.132 | 9.15E-67 | 1.4 | UGGT2     | 2.053030303 |
| LDLRAD41   | 6.79E-71 | 0.4580578 | 0.304 | 0.154 | 1.64E-66 | 1.4 | LDLRAD4   | 1.974025974 |
| LINC011522 | 1.02E-70 | 0.3367    | 0.142 | 0.049 | 2.46E-66 | 1.4 | LINC01152 | 2.897959184 |
| PGM11      | 1.24E-70 | 0.3053002 | 0.181 | 0.072 | 2.98E-66 | 1.4 | PGM1      | 2.513888889 |
| OAT2       | 2.66E-70 | 0.3868618 | 0.439 | 0.257 | 6.42E-66 | 1.4 | OAT       | 1.708171206 |
| MPZL13     | 1.11E-69 | 0.4176233 | 0.549 | 0.353 | 2.67E-65 | 1.4 | MPZL1     | 1.555240793 |
| TRMT10B1   | 1.39E-69 | 0.2885724 | 0.185 | 0.075 | 3.36E-65 | 1.4 | TRMT10B   | 2.466666667 |
| LYPLAL11   | 2.30E-69 | 0.2679125 | 0.129 | 0.043 | 5.54E-65 | 1.4 | LYPLAL1   | 3           |
| MIR3142HG1 | 3.56E-69 | 0.1290761 | 0.047 | 0.006 | 8.60E-65 | 1.4 | MIR3142H  | 7.833333333 |
| RNF144B1   | 7.36E-69 | 0.5070054 | 0.44  | 0.269 | 1.77E-64 | 1.4 | RNF144B   | 1.635687732 |
| CASP41     | 7.81E-69 | 0.3707138 | 0.39  | 0.221 | 1.88E-64 | 1.4 | CASP4     | 1.764705882 |
| NHS        | 1.07E-68 | 0.3486015 | 0.302 | 0.152 | 2.58E-64 | 1.4 | NHS       | 1.986842105 |
| PNN3       | 1.18E-68 | 0.3601742 | 0.493 | 0.302 | 2.84E-64 | 1.4 | PNN       | 1.632450331 |
| PLPP3      | 1.66E-68 | 0.4740625 | 0.404 | 0.234 | 4.01E-64 | 1.4 | PLPP3     | 1.726495726 |
| RPL10A3    | 1.74E-68 | 0.4800633 | 0.81  | 0.706 | 4.19E-64 | 1.4 | RPL10A    | 1.147308782 |
| EIF4A13    | 3.10E-68 | 0.3705583 | 0.582 | 0.381 | 7.48E-64 | 1.4 | EIF4A1    | 1.527559055 |
| KCND22     | 6.22E-68 | 0.5332247 | 0.137 | 0.048 | 1.50E-63 | 1.4 | KCND2     | 2.854166667 |
| CLINT13    | 9.07E-68 | 0.3576504 | 0.404 | 0.229 | 2.19E-63 | 1.4 | CLINT1    | 1.76419214  |
| TPTEP12    | 1.03E-67 | 0.4030465 | 0.281 | 0.141 | 2.47E-63 | 1.4 | TPTEP1    | 1.992907801 |
| SLCO3A12   | 1.82E-67 | 0.4350565 | 0.319 | 0.169 | 4.39E-63 | 1.4 | SLCO3A1   | 1.887573964 |
| PBX1       | 4.50E-67 | 0.4458479 | 0.418 | 0.244 | 1.08E-62 | 1.4 | PBX1      | 1.713114754 |
| STRA6      | 1.71E-66 | 0.1097796 | 0.031 | 0.003 | 4.13E-62 | 1.4 | STRA6     | 10.33333333 |
| GBP31      | 2.12E-66 | 0.3839842 | 0.258 | 0.126 | 5.10E-62 | 1.4 | GBP3      | 2.047619048 |
| CLEC1A     | 6.17E-66 | 0.1620623 | 0.066 | 0.014 | 1.49E-61 | 1.4 | CLEC1A    | 4.714285714 |
| NIPAL31    | 1.00E-65 | 0.2979239 | 0.133 | 0.046 | 2.42E-61 | 1.4 | NIPAL3    | 2.891304348 |
| ETV63      | 2.77E-65 | 0.4075976 | 0.745 | 0.556 | 6.67E-61 | 1.4 | ETV6      | 1.339928058 |
| LIMK21     | 4.03E-65 | 0.3430806 | 0.203 | 0.089 | 9.72E-61 | 1.4 | LIMK2     | 2.280898876 |
| PUS101     | 6.76E-65 | 0.2460748 | 0.127 | 0.043 | 1.63E-60 | 1.4 | PUS10     | 2.953488372 |
| ETS13      | 9.69E-65 | 0.3109775 | 0.151 | 0.057 | 2.34E-60 | 1.4 | ETS1      | 2.649122807 |
| C1RL-AS11  | 1.54E-64 | 0.1816828 | 0.06  | 0.012 | 3.71E-60 | 1.4 | C1RL-AS1  | 5           |
| TMEM1233   | 2.50E-64 | 0.3771241 | 0.467 | 0.283 | 6.04E-60 | 1.4 | TMEM123   | 1.650176678 |
| CYYR12     | 3.34E-64 | 0.2525054 | 0.1   | 0.03  | 8.04E-60 | 1.4 | CYYR1     | 3.333333333 |
| ZNF33B1    | 3.52E-64 | 0.3302825 | 0.251 | 0.121 | 8.48E-60 | 1.4 | ZNF33B    | 2.074380165 |
| FBXO322    | 4.91E-64 | 0.7274184 | 0.519 | 0.351 | 1.18E-59 | 1.4 | FBXO32    | 1.478632479 |
| ENO13      | 7.12E-64 | 0.3996653 | 0.553 | 0.361 | 1.72E-59 | 1.4 | ENO1      | 1.531855956 |
| ITFG11     | 8.07E-64 | 0.4118537 | 0.426 | 0.254 | 1.95E-59 | 1.4 | ITFG1     | 1.677165354 |
| CDC42EP52  | 8.25E-64 | 0.1663905 | 0.061 | 0.012 | 1.99E-59 | 1.4 | CDC42EP5  | 5.083333333 |
| SLC26A4    | 1.13E-63 | 0.3204145 | 0.058 | 0.011 | 2.73E-59 | 1.4 | SLC26A4   | 5.272727273 |
| ODAM1      | 1.62E-63 | 0.3791549 | 0.048 | 0.008 | 3.91E-59 | 1.4 | ODAM      | 6           |
| FAM135A1   | 2.20E-63 | 0.30059   | 0.147 | 0.055 | 5.30E-59 | 1.4 | FAM135A   | 2.672727273 |
| NRG12      | 2.40E-63 | 0.4000078 | 0.17  | 0.069 | 5.80E-59 | 1.4 | NRG1      | 2.463768116 |
| FGFBP12    | 3.22E-63 | 0.3268063 | 0.098 | 0.028 | 7.76E-59 | 1.4 | FGFBP1    | 3.5         |
| HELB1      | 4.21E-63 | 0.3286727 | 0.203 | 0.09  | 1.01E-58 | 1.4 | HELB      | 2.255555556 |
| SLC25A271  | 4.48E-63 | 0.1686741 | 0.058 | 0.011 | 1.08E-58 | 1.4 | SLC25A27  | 5.272727273 |
| CASP13     | 4.73E-63 | 0.1953415 | 0.087 | 0.023 | 1.14E-58 | 1.4 | CASP1     | 3.782608696 |
| TGFBR33    | 4.76E-63 | 0.4234431 | 0.198 | 0.087 | 1.15E-58 | 1.4 | TGFBR3    | 2.275862069 |
| DDR22      | 5.15E-63 | 0.3532012 | 0.17  | 0.069 | 1.24E-58 | 1.4 | DDR2      | 2.463768116 |

|               |          |           |       |       |          |     |           |             |
|---------------|----------|-----------|-------|-------|----------|-----|-----------|-------------|
| LRP22         | 5.43E-63 | 0.4578025 | 0.302 | 0.159 | 1.31E-58 | 1.4 | LRP2      | 1.899371069 |
| SPIDR1        | 7.56E-63 | 0.4282422 | 0.769 | 0.58  | 1.82E-58 | 1.4 | SPIDR     | 1.325862069 |
| OLFM41        | 9.03E-63 | 0.4334919 | 0.064 | 0.014 | 2.18E-58 | 1.4 | OLFM4     | 4.571428571 |
| FAM171A11     | 1.42E-62 | 0.2593602 | 0.112 | 0.036 | 3.41E-58 | 1.4 | FAM171A1  | 3.111111111 |
| TIMM23B1      | 1.53E-62 | 0.3781198 | 0.302 | 0.16  | 3.70E-58 | 1.4 | TIMM23B   | 1.8875      |
| SF3B32        | 2.03E-62 | 0.3557309 | 0.267 | 0.134 | 4.90E-58 | 1.4 | SF3B3     | 1.992537313 |
| RAD51B1       | 2.40E-62 | 0.3876908 | 0.373 | 0.214 | 5.79E-58 | 1.4 | RAD51B    | 1.742990654 |
| TRIM381       | 5.68E-62 | 0.3055849 | 0.195 | 0.086 | 1.37E-57 | 1.4 | TRIM38    | 2.26744186  |
| NRG31         | 8.01E-62 | 0.3539723 | 0.151 | 0.059 | 1.93E-57 | 1.4 | NRG3      | 2.559322034 |
| NTN12         | 8.79E-62 | 0.3320658 | 0.22  | 0.102 | 2.12E-57 | 1.4 | NTN1      | 2.156862745 |
| PTBP23        | 1.09E-61 | 0.3571532 | 0.509 | 0.323 | 2.64E-57 | 1.4 | PTBP2     | 1.575851393 |
| SLC15A11      | 1.48E-61 | 0.2021241 | 0.069 | 0.016 | 3.56E-57 | 1.4 | SLC15A1   | 4.3125      |
| IL12RB11      | 1.65E-61 | 0.170752  | 0.066 | 0.015 | 3.99E-57 | 1.4 | IL12RB1   | 4.4         |
| RP11-353M9.12 | 2.21E-61 | 0.1599436 | 0.045 | 0.007 | 5.32E-57 | 1.4 | RP11-353M | 6.428571429 |
| RIF13         | 3.26E-61 | 0.3606487 | 0.365 | 0.208 | 7.86E-57 | 1.4 | RIF1      | 1.754807692 |
| CFLAR-AS12    | 3.33E-61 | 0.2481524 | 0.122 | 0.042 | 8.02E-57 | 1.4 | CFLAR-AS1 | 2.904761905 |
| VRK21         | 3.36E-61 | 0.3255748 | 0.251 | 0.122 | 8.10E-57 | 1.4 | VRK2      | 2.057377049 |
| PLCB41        | 3.95E-61 | 0.3233952 | 0.192 | 0.084 | 9.52E-57 | 1.4 | PLCB4     | 2.285714286 |
| TPD52L12      | 4.30E-61 | 0.3774022 | 0.256 | 0.128 | 1.04E-56 | 1.4 | TPD52L1   | 2           |
| NCOA22        | 5.08E-61 | 0.4167803 | 0.599 | 0.414 | 1.22E-56 | 1.4 | NCOA2     | 1.446859903 |
| ALPL2         | 6.45E-61 | 0.2465103 | 0.085 | 0.023 | 1.56E-56 | 1.4 | ALPL      | 3.695652174 |
| PTK2B2        | 7.58E-61 | 0.2197855 | 0.096 | 0.029 | 1.83E-56 | 1.4 | PTK2B     | 3.310344828 |
| CYP24A12      | 1.01E-60 | 0.3643101 | 0.221 | 0.102 | 2.42E-56 | 1.4 | CYP24A1   | 2.166666667 |
| SPP11         | 1.10E-60 | 0.5761622 | 0.05  | 0.009 | 2.65E-56 | 1.4 | SPP1      | 5.555555556 |
| GSDMC1        | 1.29E-60 | 0.158755  | 0.064 | 0.014 | 3.12E-56 | 1.4 | GSDMC     | 4.571428571 |
| RP11-93K22.61 | 2.97E-60 | 0.1250437 | 0.047 | 0.007 | 7.17E-56 | 1.4 | RP11-93K2 | 6.714285714 |
| UGT2B72       | 3.28E-60 | 0.1718304 | 0.074 | 0.018 | 7.92E-56 | 1.4 | UGT2B7    | 4.111111111 |
| ADARB11       | 7.96E-60 | 0.2103931 | 0.094 | 0.028 | 1.92E-55 | 1.4 | ADARB1    | 3.357142857 |
| SRPK12        | 1.02E-59 | 0.3968998 | 0.648 | 0.466 | 2.46E-55 | 1.4 | SRPK1     | 1.39055794  |
| SIRPA1        | 1.26E-59 | 0.2153392 | 0.094 | 0.028 | 3.03E-55 | 1.4 | SIRPA     | 3.357142857 |
| MAGED11       | 1.44E-59 | 0.3002418 | 0.181 | 0.078 | 3.47E-55 | 1.4 | MAGED1    | 2.320512821 |
| S100A71       | 2.92E-59 | 0.9222163 | 0.054 | 0.01  | 7.05E-55 | 1.4 | S100A7    | 5.4         |
| SCGB2B21      | 3.14E-59 | 0.2437449 | 0.129 | 0.046 | 7.56E-55 | 1.4 | SCGB2B2   | 2.804347826 |
| EIF4E22       | 4.74E-59 | 0.3515905 | 0.481 | 0.303 | 1.14E-54 | 1.4 | EIF4E2    | 1.587458746 |
| NCK12         | 7.01E-59 | 0.3007041 | 0.207 | 0.095 | 1.69E-54 | 1.4 | NCK1      | 2.178947368 |
| ITGB41        | 1.23E-58 | 0.2822241 | 0.1   | 0.031 | 2.96E-54 | 1.4 | ITGB4     | 3.225806452 |
| RP11-66B24.42 | 1.57E-58 | 0.2468475 | 0.102 | 0.032 | 3.79E-54 | 1.4 | RP11-66B2 | 3.1875      |
| UBA523        | 2.27E-58 | 0.2703943 | 0.957 | 0.914 | 5.48E-54 | 1.4 | UBA52     | 1.047045952 |
| B4GALT61      | 2.56E-58 | 0.190888  | 0.071 | 0.017 | 6.17E-54 | 1.4 | B4GALT6   | 4.176470588 |
| RP4-765H13.12 | 2.87E-58 | 0.1859568 | 0.063 | 0.014 | 6.92E-54 | 1.4 | RP4-765H1 | 4.5         |
| UAP12         | 4.69E-58 | 0.2852258 | 0.26  | 0.131 | 1.13E-53 | 1.4 | UAP1      | 1.984732824 |
| MID13         | 5.09E-58 | 0.3362884 | 0.142 | 0.055 | 1.23E-53 | 1.4 | MID1      | 2.581818182 |
| SEL1L32       | 5.73E-58 | 0.2064407 | 0.086 | 0.025 | 1.38E-53 | 1.4 | SEL1L3    | 3.44        |
| MAP4K42       | 6.26E-58 | 0.3341209 | 0.377 | 0.218 | 1.51E-53 | 1.4 | MAP4K4    | 1.729357798 |
| PRKX2         | 2.07E-57 | 0.2743407 | 0.198 | 0.09  | 4.98E-53 | 1.4 | PRKX      | 2.2         |
| PARP141       | 2.29E-57 | 0.3505255 | 0.244 | 0.122 | 5.53E-53 | 1.4 | PARP14    | 2           |
| C5orf561      | 2.71E-57 | 0.29628   | 0.181 | 0.079 | 6.53E-53 | 1.4 | C5orf56   | 2.291139241 |
| PLEKHA51      | 3.06E-57 | 0.3328698 | 0.56  | 0.372 | 7.37E-53 | 1.4 | PLEKHA5   | 1.505376344 |
| MAPK141       | 3.34E-57 | 0.3509406 | 0.27  | 0.141 | 8.06E-53 | 1.4 | MAPK14    | 1.914893617 |
| INVS1         | 3.49E-57 | 0.3384838 | 0.195 | 0.089 | 8.42E-53 | 1.4 | INVS      | 2.191011236 |
| PARK2         | 5.05E-57 | 0.3874366 | 0.305 | 0.167 | 1.22E-52 | 1.4 | PARK2     | 1.826347305 |
| LRR492        | 5.20E-57 | 0.2881896 | 0.165 | 0.069 | 1.25E-52 | 1.4 | LRR49     | 2.391304348 |

|               |          |           |       |       |          |     |           |             |
|---------------|----------|-----------|-------|-------|----------|-----|-----------|-------------|
| KIAA0319L1    | 5.52E-57 | 0.3425639 | 0.269 | 0.139 | 1.33E-52 | 1.4 | KIAA0319L | 1.935251799 |
| RASGEF1A1     | 5.82E-57 | 0.212268  | 0.082 | 0.023 | 1.40E-52 | 1.4 | RASGEF1A  | 3.565217391 |
| RARS3         | 7.89E-57 | 0.3552969 | 0.356 | 0.205 | 1.90E-52 | 1.4 | RARS      | 1.736585366 |
| FZD71         | 9.87E-57 | 0.2114087 | 0.099 | 0.032 | 2.38E-52 | 1.4 | FZD7      | 3.09375     |
| ESD3          | 1.95E-56 | 0.332334  | 0.469 | 0.295 | 4.70E-52 | 1.4 | ESD       | 1.589830508 |
| RNASEH2B1     | 2.12E-56 | 0.1788133 | 0.085 | 0.024 | 5.12E-52 | 1.4 | RNASEH2B  | 3.541666667 |
| RGS22         | 2.13E-56 | 0.4583129 | 0.233 | 0.115 | 5.14E-52 | 1.4 | RGS2      | 2.026086957 |
| HLA-B3        | 2.47E-56 | 0.3799826 | 0.703 | 0.522 | 5.96E-52 | 1.4 | HLA-B     | 1.346743295 |
| WIPI11        | 3.29E-56 | 0.323767  | 0.257 | 0.132 | 7.94E-52 | 1.4 | WIPI1     | 1.946969697 |
| ECHDC11       | 3.70E-56 | 0.3689737 | 0.333 | 0.191 | 8.93E-52 | 1.4 | ECHDC1    | 1.743455497 |
| ANKRD63       | 4.56E-56 | 0.2504346 | 0.118 | 0.042 | 1.10E-51 | 1.4 | ANKRD6    | 2.80952381  |
| CPAMD83       | 6.07E-56 | 0.2831136 | 0.14  | 0.055 | 1.46E-51 | 1.4 | CPAMD8    | 2.545454545 |
| MINK12        | 8.17E-56 | 0.3319938 | 0.191 | 0.088 | 1.97E-51 | 1.4 | MINK1     | 2.170454545 |
| EMC22         | 8.91E-56 | 0.270947  | 0.263 | 0.134 | 2.15E-51 | 1.4 | EMC2      | 1.962686567 |
| LRR8B2        | 9.21E-56 | 0.2289987 | 0.203 | 0.093 | 2.22E-51 | 1.4 | LRR8B     | 2.182795699 |
| TMEM1593      | 1.26E-55 | 0.3355125 | 0.463 | 0.292 | 3.03E-51 | 1.4 | TMEM159   | 1.585616438 |
| TCEAL83       | 1.47E-55 | 0.3536378 | 0.369 | 0.217 | 3.55E-51 | 1.4 | TCEAL8    | 1.700460829 |
| LINC008532    | 1.57E-55 | 0.1482876 | 0.056 | 0.012 | 3.79E-51 | 1.4 | LINC00853 | 4.666666667 |
| MTERF41       | 1.72E-55 | 0.2333817 | 0.133 | 0.051 | 4.15E-51 | 1.4 | MTERF4    | 2.607843137 |
| CCDC1221      | 1.74E-55 | 0.2022801 | 0.097 | 0.031 | 4.20E-51 | 1.4 | CCDC122   | 3.129032258 |
| GLTP2         | 2.04E-55 | 0.3115026 | 0.238 | 0.118 | 4.93E-51 | 1.4 | GLTP      | 2.016949153 |
| MT-CYB3       | 2.33E-55 | 0.2134555 | 0.985 | 0.992 | 5.62E-51 | 1.4 | MT-CYB    | 0.992943548 |
| KRIT11        | 2.83E-55 | 0.2903733 | 0.214 | 0.102 | 6.82E-51 | 1.4 | KRIT1     | 2.098039216 |
| IGF2BP23      | 3.39E-55 | 0.1566084 | 0.431 | 0.252 | 8.16E-51 | 1.4 | IGF2BP2   | 1.71031746  |
| PRKCE1        | 4.28E-55 | 0.4596908 | 0.32  | 0.182 | 1.03E-50 | 1.4 | PRKCE     | 1.758241758 |
| ARHGEF10L3    | 4.54E-55 | 0.3691101 | 0.284 | 0.153 | 1.09E-50 | 1.4 | ARHGEF10  | 1.85620915  |
| SUPT3H2       | 5.83E-55 | 0.3382604 | 0.208 | 0.099 | 1.41E-50 | 1.4 | SUPT3H    | 2.101010101 |
| PDE1C2        | 6.46E-55 | 0.2898447 | 0.103 | 0.034 | 1.56E-50 | 1.4 | PDE1C     | 3.029411765 |
| THAP61        | 7.32E-55 | 0.2230162 | 0.126 | 0.047 | 1.77E-50 | 1.4 | THAP6     | 2.680851064 |
| HIBCH1        | 7.66E-55 | 0.299642  | 0.209 | 0.099 | 1.85E-50 | 1.4 | HIBCH     | 2.111111111 |
| RPS83         | 1.05E-54 | 0.4312751 | 0.819 | 0.728 | 2.52E-50 | 1.4 | RPS8      | 1.125       |
| H6PD1         | 1.06E-54 | 0.2156167 | 0.098 | 0.031 | 2.55E-50 | 1.4 | H6PD      | 3.161290323 |
| DOPEY11       | 1.06E-54 | 0.2623901 | 0.17  | 0.074 | 2.55E-50 | 1.4 | DOPEY1    | 2.297297297 |
| RNF2131       | 1.64E-54 | 0.3255628 | 0.302 | 0.165 | 3.96E-50 | 1.4 | RNF213    | 1.83030303  |
| SEPP11        | 2.34E-54 | 0.2681457 | 0.468 | 0.293 | 5.63E-50 | 1.4 | SEPP1     | 1.597269625 |
| SAMD9L        | 2.49E-54 | 0.1713509 | 0.063 | 0.015 | 6.01E-50 | 1.4 | SAMD9L    | 4.2         |
| EIF3M3        | 2.70E-54 | 0.2876738 | 0.492 | 0.312 | 6.51E-50 | 1.4 | EIF3M     | 1.576923077 |
| PIBF11        | 2.86E-54 | 0.3453606 | 0.294 | 0.161 | 6.91E-50 | 1.4 | PIBF1     | 1.826086957 |
| ZNF37A1       | 3.27E-54 | 0.2471699 | 0.141 | 0.056 | 7.88E-50 | 1.4 | ZNF37A    | 2.517857143 |
| NOD23         | 3.31E-54 | 0.2136968 | 0.1   | 0.033 | 7.98E-50 | 1.4 | NOD2      | 3.03030303  |
| KIAA0226L3    | 4.27E-54 | 0.1943608 | 0.118 | 0.042 | 1.03E-49 | 1.4 | KIAA0226L | 2.80952381  |
| CARD163       | 4.55E-54 | 0.212239  | 0.109 | 0.037 | 1.10E-49 | 1.4 | CARD16    | 2.945945946 |
| RNF1701       | 6.24E-54 | 0.2056883 | 0.098 | 0.032 | 1.50E-49 | 1.4 | RNF170    | 3.0625      |
| B3GALT53      | 6.51E-54 | 0.2048741 | 0.077 | 0.021 | 1.57E-49 | 1.4 | B3GALT5   | 3.666666667 |
| PFDN53        | 1.01E-53 | 0.2766171 | 0.901 | 0.839 | 2.44E-49 | 1.4 | PFDN5     | 1.073897497 |
| C2CD21        | 1.15E-53 | 0.1732644 | 0.077 | 0.021 | 2.78E-49 | 1.4 | C2CD2     | 3.666666667 |
| CLDN81        | 1.34E-53 | 0.2262119 | 0.129 | 0.049 | 3.23E-49 | 1.4 | CLDN8     | 2.632653061 |
| ZNF3971       | 1.37E-53 | 0.2699316 | 0.184 | 0.083 | 3.31E-49 | 1.4 | ZNF397    | 2.21686747  |
| SPARCL13      | 1.66E-53 | 0.1803595 | 0.099 | 0.032 | 4.01E-49 | 1.4 | SPARCL1   | 3.09375     |
| LCN21         | 1.70E-53 | 0.2614317 | 0.056 | 0.012 | 4.10E-49 | 1.4 | LCN2      | 4.666666667 |
| RP4-678D15.12 | 1.80E-53 | 0.2897461 | 0.167 | 0.072 | 4.34E-49 | 1.4 | RP4-678D1 | 2.319444444 |
| AMBRA12       | 3.03E-53 | 0.4936044 | 0.776 | 0.665 | 7.32E-49 | 1.4 | AMBRA1    | 1.166917293 |

|                |          |           |       |       |          |     |            |             |
|----------------|----------|-----------|-------|-------|----------|-----|------------|-------------|
| TRMT113        | 3.94E-53 | 0.2786225 | 0.191 | 0.089 | 9.50E-49 | 1.4 | TRMT11     | 2.146067416 |
| BARX23         | 5.39E-53 | 0.4203671 | 0.383 | 0.234 | 1.30E-48 | 1.4 | BARX2      | 1.636752137 |
| CSF3R          | 6.02E-53 | 0.2026405 | 0.094 | 0.03  | 1.45E-48 | 1.4 | CSF3R      | 3.133333333 |
| RP11-692D12.11 | 6.22E-53 | 0.200156  | 0.069 | 0.018 | 1.50E-48 | 1.4 | RP11-692D  | 3.833333333 |
| SHPRH1         | 6.94E-53 | 0.2823082 | 0.177 | 0.079 | 1.67E-48 | 1.4 | SHPRH      | 2.240506329 |
| ADGRA32        | 7.72E-53 | 0.248226  | 0.163 | 0.07  | 1.86E-48 | 1.4 | ADGRA3     | 2.328571429 |
| EIF2B52        | 1.35E-52 | 0.4216233 | 0.602 | 0.444 | 3.25E-48 | 1.4 | EIF2B5     | 1.355855856 |
| C9orf722       | 1.63E-52 | 0.2241603 | 0.126 | 0.048 | 3.93E-48 | 1.4 | C9orf72    | 2.625       |
| GLYATL21       | 1.90E-52 | 0.1993731 | 0.11  | 0.039 | 4.58E-48 | 1.4 | GLYATL2    | 2.820512821 |
| MLH31          | 2.89E-52 | 0.2527111 | 0.15  | 0.063 | 6.97E-48 | 1.4 | MLH3       | 2.380952381 |
| ZNF780B1       | 4.42E-52 | 0.1680587 | 0.077 | 0.022 | 1.07E-47 | 1.4 | ZNF780B    | 3.5         |
| ASCC11         | 6.32E-52 | 0.2961604 | 0.248 | 0.129 | 1.52E-47 | 1.4 | ASCC1      | 1.92248062  |
| SDC42          | 6.63E-52 | 0.4020208 | 0.475 | 0.311 | 1.60E-47 | 1.4 | SDC4       | 1.52733119  |
| SEC22A1        | 6.67E-52 | 0.3011433 | 0.219 | 0.108 | 1.61E-47 | 1.4 | SEC22A     | 2.027777778 |
| RP11-367G18.1  | 9.28E-52 | 0.1260213 | 0.043 | 0.007 | 2.24E-47 | 1.4 | RP11-367G  | 6.142857143 |
| LITAF2         | 1.01E-51 | 0.3663415 | 0.592 | 0.419 | 2.44E-47 | 1.4 | LITAF      | 1.412887828 |
| EML43          | 1.14E-51 | 0.3117449 | 0.279 | 0.151 | 2.75E-47 | 1.4 | EML4       | 1.847682119 |
| ZNF618         | 1.39E-51 | 0.1412389 | 0.056 | 0.013 | 3.35E-47 | 1.4 | ZNF618     | 4.307692308 |
| MCC1           | 1.87E-51 | 0.3026446 | 0.197 | 0.094 | 4.50E-47 | 1.4 | MCC        | 2.095744681 |
| TNFAIP82       | 2.00E-51 | 0.4929942 | 0.533 | 0.368 | 4.82E-47 | 1.4 | TNFAIP8    | 1.448369565 |
| ZNF7081        | 2.13E-51 | 0.3578858 | 0.142 | 0.058 | 5.14E-47 | 1.4 | ZNF708     | 2.448275862 |
| STIL2          | 2.37E-51 | 0.2369225 | 0.115 | 0.042 | 5.70E-47 | 1.4 | STIL       | 2.738095238 |
| VPS541         | 2.42E-51 | 0.3401194 | 0.308 | 0.174 | 5.84E-47 | 1.4 | VPS54      | 1.770114943 |
| RP11-115D19.1  | 4.09E-51 | 0.2414425 | 0.077 | 0.022 | 9.87E-47 | 1.4 | RP11-115D  | 3.5         |
| CREB3L21       | 4.68E-51 | 0.3029698 | 0.164 | 0.072 | 1.13E-46 | 1.4 | CREB3L2    | 2.277777778 |
| PAK33          | 4.82E-51 | 0.2895933 | 0.106 | 0.037 | 1.16E-46 | 1.4 | PAK3       | 2.864864865 |
| HUWE12         | 6.74E-51 | 0.3267855 | 0.413 | 0.256 | 1.63E-46 | 1.4 | HUWE1      | 1.61328125  |
| ZBTB201        | 7.37E-51 | 0.3570739 | 0.691 | 0.501 | 1.78E-46 | 1.4 | ZBTB20     | 1.379241517 |
| AC005042.42    | 1.24E-50 | 0.2580779 | 0.101 | 0.035 | 2.99E-46 | 1.4 | AC005042.  | 2.885714286 |
| COX7A2L3       | 1.90E-50 | 0.3112033 | 0.655 | 0.479 | 4.57E-46 | 1.4 | COX7A2L    | 1.36743215  |
| ATRNL11        | 2.29E-50 | 0.3012942 | 0.114 | 0.042 | 5.52E-46 | 1.4 | ATRNL1     | 2.714285714 |
| TBX193         | 2.42E-50 | 0.250054  | 0.127 | 0.05  | 5.84E-46 | 1.4 | TBX19      | 2.54        |
| PML2           | 3.00E-50 | 0.2628776 | 0.16  | 0.07  | 7.24E-46 | 1.4 | PML        | 2.285714286 |
| EIF3K3         | 3.52E-50 | 0.2920766 | 0.484 | 0.312 | 8.48E-46 | 1.4 | EIF3K      | 1.551282051 |
| ACO11          | 3.76E-50 | 0.2040381 | 0.094 | 0.031 | 9.08E-46 | 1.4 | ACO1       | 3.032258065 |
| VWA5A1         | 6.78E-50 | 0.2359178 | 0.17  | 0.077 | 1.63E-45 | 1.4 | VWA5A      | 2.207792208 |
| LRRC75A3       | 8.46E-50 | 0.3479629 | 0.239 | 0.125 | 2.04E-45 | 1.4 | LRRC75A    | 1.912       |
| FBL3           | 1.04E-49 | 0.2471316 | 0.238 | 0.122 | 2.50E-45 | 1.4 | FBL        | 1.950819672 |
| ARHGEF91       | 1.33E-49 | 0.1862522 | 0.087 | 0.028 | 3.20E-45 | 1.4 | ARHGEF9    | 3.107142857 |
| TFCP21         | 1.55E-49 | 0.3057911 | 0.203 | 0.099 | 3.73E-45 | 1.4 | TFCP2      | 2.050505051 |
| TYW51          | 1.72E-49 | 0.2181144 | 0.117 | 0.044 | 4.14E-45 | 1.4 | TYW5       | 2.659090909 |
| RP5-896L10.13  | 2.33E-49 | 0.2791623 | 0.362 | 0.213 | 5.63E-45 | 1.4 | RP5-896L10 | 1.699530516 |
| ZNF280D1       | 2.40E-49 | 0.2741617 | 0.174 | 0.08  | 5.80E-45 | 1.4 | ZNF280D    | 2.175       |
| CDKAL11        | 2.60E-49 | 0.3689552 | 0.368 | 0.224 | 6.27E-45 | 1.4 | CDKAL1     | 1.642857143 |
| PLEKHM31       | 2.98E-49 | 0.1767369 | 0.082 | 0.025 | 7.18E-45 | 1.4 | PLEKHM3    | 3.28        |
| ZKSCAN1        | 3.16E-49 | 0.3405741 | 0.388 | 0.239 | 7.62E-45 | 1.4 | ZKSCAN1    | 1.623430962 |
| RPL273         | 3.17E-49 | 0.2500373 | 0.948 | 0.904 | 7.64E-45 | 1.4 | RPL27      | 1.048672566 |
| NSMCE11        | 3.27E-49 | 0.237118  | 0.172 | 0.078 | 7.89E-45 | 1.4 | NSMCE1     | 2.205128205 |
| CLEC2B3        | 3.94E-49 | 0.222936  | 0.136 | 0.055 | 9.51E-45 | 1.4 | CLEC2B     | 2.472727273 |
| ATXN31         | 1.26E-48 | 0.3086858 | 0.247 | 0.131 | 3.04E-44 | 1.4 | ATXN3      | 1.885496183 |
| AC026167.1     | 1.46E-48 | 0.10023   | 0.033 | 0.004 | 3.51E-44 | 1.4 | AC026167.  | 8.25        |
| SMIM82         | 1.63E-48 | 0.2343329 | 0.126 | 0.05  | 3.94E-44 | 1.4 | SMIM8      | 2.52        |

|               |          |           |       |       |          |     |           |             |
|---------------|----------|-----------|-------|-------|----------|-----|-----------|-------------|
| CIR11         | 2.15E-48 | 0.3073192 | 0.39  | 0.24  | 5.19E-44 | 1.4 | CIR1      | 1.625       |
| DPYSL21       | 2.35E-48 | 0.2939897 | 0.215 | 0.109 | 5.66E-44 | 1.4 | DPYSL2    | 1.972477064 |
| RPL103        | 3.43E-48 | 0.5515124 | 0.954 | 0.933 | 8.26E-44 | 1.4 | RPL10     | 1.022508039 |
| SOS11         | 3.71E-48 | 0.3852825 | 0.516 | 0.352 | 8.94E-44 | 1.4 | SOS1      | 1.465909091 |
| ROR11         | 3.77E-48 | 0.2435133 | 0.069 | 0.019 | 9.09E-44 | 1.4 | ROR1      | 3.631578947 |
| XPNPEP12      | 5.19E-48 | 0.2482083 | 0.162 | 0.073 | 1.25E-43 | 1.4 | XPNPEP1   | 2.219178082 |
| RP1-122P2.21  | 5.82E-48 | 0.1899243 | 0.067 | 0.018 | 1.40E-43 | 1.4 | RP1-122P2 | 3.722222222 |
| ADGRF11       | 5.85E-48 | 0.2027812 | 0.085 | 0.027 | 1.41E-43 | 1.4 | ADGRF1    | 3.148148148 |
| PDZD23        | 6.49E-48 | 0.357329  | 0.618 | 0.454 | 1.56E-43 | 1.4 | PDZD2     | 1.36123348  |
| PLA2G4C1      | 1.13E-47 | 0.2241227 | 0.106 | 0.039 | 2.74E-43 | 1.4 | PLA2G4C   | 2.717948718 |
| GAB11         | 1.29E-47 | 0.542115  | 0.515 | 0.37  | 3.10E-43 | 1.4 | GAB1      | 1.391891892 |
| RP11-304M2.32 | 1.45E-47 | 0.1989947 | 0.086 | 0.028 | 3.51E-43 | 1.4 | RP11-304M | 3.071428571 |
| ATF7IP1       | 1.92E-47 | 0.3469232 | 0.287 | 0.162 | 4.62E-43 | 1.4 | ATF7IP    | 1.771604938 |
| CALCOCO23     | 2.12E-47 | 0.2995158 | 0.382 | 0.236 | 5.10E-43 | 1.4 | CALCOCO2  | 1.618644068 |
| PHF141        | 2.19E-47 | 0.329998  | 0.22  | 0.114 | 5.28E-43 | 1.4 | PHF14     | 1.929824561 |
| TMEM176A2     | 2.22E-47 | 0.1973615 | 0.081 | 0.025 | 5.36E-43 | 1.4 | TMEM176A  | 3.24        |
| SESTD13       | 2.24E-47 | 0.3168079 | 0.654 | 0.467 | 5.40E-43 | 1.4 | SESTD1    | 1.400428266 |
| WBP2NL2       | 2.57E-47 | 0.1856203 | 0.088 | 0.029 | 6.20E-43 | 1.4 | WBP2NL    | 3.034482759 |
| KCNK52        | 2.63E-47 | 0.1708934 | 0.054 | 0.013 | 6.34E-43 | 1.4 | KCNK5     | 4.153846154 |
| FIGN1         | 2.87E-47 | 0.3153648 | 0.191 | 0.093 | 6.93E-43 | 1.4 | FIGN      | 2.053763441 |
| WWOX1         | 3.62E-47 | 0.5949524 | 0.352 | 0.222 | 8.72E-43 | 1.4 | WWOX      | 1.585585586 |
| CDK63         | 4.13E-47 | 0.2475451 | 0.228 | 0.118 | 9.96E-43 | 1.4 | CDK6      | 1.93220339  |
| NLGN4X2       | 4.70E-47 | 0.2070232 | 0.105 | 0.039 | 1.13E-42 | 1.4 | NLGN4X    | 2.692307692 |
| CDC42EP12     | 5.39E-47 | 0.2601783 | 0.088 | 0.029 | 1.30E-42 | 1.4 | CDC42EP1  | 3.034482759 |
| CRBN3         | 5.82E-47 | 0.2541195 | 0.247 | 0.132 | 1.40E-42 | 1.4 | CRBN      | 1.871212121 |
| ZNF5441       | 5.84E-47 | 0.2416867 | 0.166 | 0.076 | 1.41E-42 | 1.4 | ZNF544    | 2.184210526 |
| SPG111        | 6.57E-47 | 0.3571826 | 0.433 | 0.279 | 1.58E-42 | 1.4 | SPG11     | 1.551971326 |
| HOMER21       | 7.33E-47 | 0.3776794 | 0.277 | 0.156 | 1.77E-42 | 1.4 | HOMER2    | 1.775641026 |
| CTA-292E10.61 | 7.47E-47 | 0.2509965 | 0.17  | 0.078 | 1.80E-42 | 1.4 | CTA-292E1 | 2.179487179 |
| RSL1D13       | 7.90E-47 | 0.2412508 | 0.621 | 0.431 | 1.91E-42 | 1.4 | RSL1D1    | 1.440835267 |
| ATM1          | 8.91E-47 | 0.2555837 | 0.137 | 0.058 | 2.15E-42 | 1.4 | ATM       | 2.362068966 |
| RBMX1         | 1.24E-46 | 0.2941412 | 0.31  | 0.18  | 2.99E-42 | 1.4 | RBMX      | 1.722222222 |
| RABGAP11      | 1.25E-46 | 0.3142186 | 0.41  | 0.261 | 3.01E-42 | 1.4 | RABGAP1   | 1.570881226 |
| GABRE2        | 1.37E-46 | 0.1597987 | 0.079 | 0.025 | 3.30E-42 | 1.4 | GABRE     | 3.16        |
| H1F01         | 1.42E-46 | 0.3216465 | 0.264 | 0.147 | 3.43E-42 | 1.4 | H1F0      | 1.795918367 |
| SLC25A12      | 1.61E-46 | 0.2753123 | 0.161 | 0.073 | 3.87E-42 | 1.4 | SLC25A12  | 2.205479452 |
| DNER1         | 1.97E-46 | 0.2866596 | 0.103 | 0.038 | 4.75E-42 | 1.4 | DNER      | 2.710526316 |
| SLC35E31      | 2.86E-46 | 0.2601398 | 0.155 | 0.069 | 6.90E-42 | 1.4 | SLC35E3   | 2.246376812 |
| ABCA5         | 3.90E-46 | 0.2649402 | 0.218 | 0.112 | 9.39E-42 | 1.4 | ABCA5     | 1.946428571 |
| NBN1          | 6.67E-46 | 0.2095996 | 0.115 | 0.045 | 1.61E-41 | 1.4 | NBN       | 2.555555556 |
| OGFRL12       | 7.79E-46 | 0.2881729 | 0.298 | 0.172 | 1.88E-41 | 1.4 | OGFRL1    | 1.73255814  |
| LINC011911    | 8.41E-46 | 0.1684485 | 0.094 | 0.033 | 2.03E-41 | 1.4 | LINC01191 | 2.848484848 |
| CTSB1         | 1.48E-45 | 0.3827405 | 0.419 | 0.275 | 3.57E-41 | 1.4 | CTSB      | 1.523636364 |
| IRF22         | 1.55E-45 | 0.2889035 | 0.356 | 0.217 | 3.74E-41 | 1.4 | IRF2      | 1.640552995 |
| PSMB81        | 2.03E-45 | 0.2272882 | 0.155 | 0.07  | 4.89E-41 | 1.4 | PSMB8     | 2.214285714 |
| LRRC37A31     | 2.15E-45 | 0.2448407 | 0.201 | 0.1   | 5.20E-41 | 1.4 | LRRC37A3  | 2.01        |
| USP391        | 2.56E-45 | 0.2729809 | 0.484 | 0.319 | 6.18E-41 | 1.4 | USP39     | 1.517241379 |
| C2            | 3.34E-45 | 0.1486913 | 0.065 | 0.018 | 8.05E-41 | 1.4 | C2        | 3.611111111 |
| CCDC661       | 3.71E-45 | 0.2688376 | 0.235 | 0.125 | 8.94E-41 | 1.4 | CCDC66    | 1.88        |
| CEBPD1        | 5.45E-45 | 0.2883302 | 0.3   | 0.174 | 1.31E-40 | 1.4 | CEBPD     | 1.724137931 |
| STRBP1        | 6.34E-45 | 0.2989524 | 0.258 | 0.143 | 1.53E-40 | 1.4 | STRBP     | 1.804195804 |
| RAP1GAP21     | 6.71E-45 | 0.3588663 | 0.24  | 0.13  | 1.62E-40 | 1.4 | RAP1GAP2  | 1.846153846 |



|               |          |           |       |       |          |     |           |             |
|---------------|----------|-----------|-------|-------|----------|-----|-----------|-------------|
| ITSN21        | 7.90E-45 | 0.3298535 | 0.412 | 0.264 | 1.91E-40 | 1.4 | ITSN2     | 1.560606061 |
| SYCP31        | 8.60E-45 | 0.1705718 | 0.058 | 0.015 | 2.07E-40 | 1.4 | SYCP3     | 3.866666667 |
| RPS193        | 8.73E-45 | 0.8093295 | 0.294 | 0.173 | 2.10E-40 | 1.4 | RPS19     | 1.699421965 |
| RHOXF1-AS11   | 9.06E-45 | 0.1156608 | 0.043 | 0.009 | 2.19E-40 | 1.4 | RHOXF1-AS | 4.777777778 |
| DDX60         | 9.27E-45 | 0.1512394 | 0.055 | 0.014 | 2.23E-40 | 1.4 | DDX60     | 3.928571429 |
| NDRG23        | 1.09E-44 | 0.34099   | 0.294 | 0.171 | 2.64E-40 | 1.4 | NDRG2     | 1.719298246 |
| SLC5A12       | 2.15E-44 | 0.2033941 | 0.113 | 0.044 | 5.18E-40 | 1.4 | SLC5A1    | 2.568181818 |
| RP11-759A24.3 | 2.15E-44 | 0.1279199 | 0.072 | 0.022 | 5.19E-40 | 1.4 | RP11-759A | 3.272727273 |
| MUC151        | 2.36E-44 | 0.1463408 | 0.062 | 0.017 | 5.68E-40 | 1.4 | MUC15     | 3.647058824 |
| HSD17B4       | 2.58E-44 | 0.3132191 | 0.284 | 0.163 | 6.22E-40 | 1.4 | HSD17B4   | 1.742331288 |
| NCMAP3        | 2.62E-44 | 0.2181677 | 0.1   | 0.037 | 6.32E-40 | 1.4 | NCMAP     | 2.702702703 |
| CEP2951       | 2.82E-44 | 0.1783152 | 0.105 | 0.039 | 6.80E-40 | 1.4 | CEP295    | 2.692307692 |
| DLEU11        | 3.17E-44 | 0.2339119 | 0.226 | 0.118 | 7.64E-40 | 1.4 | DLEU1     | 1.915254237 |
| RP11-796E2.41 | 3.17E-44 | 0.1546117 | 0.057 | 0.015 | 7.64E-40 | 1.4 | RP11-796E | 3.8         |
| HAPLN32       | 3.26E-44 | 0.1730176 | 0.056 | 0.014 | 7.85E-40 | 1.4 | HAPLN3    | 4           |
| ZFYVE91       | 3.37E-44 | 0.2443995 | 0.158 | 0.073 | 8.12E-40 | 1.4 | ZFYVE9    | 2.164383562 |
| DTWD11        | 3.95E-44 | 0.2258985 | 0.13  | 0.055 | 9.51E-40 | 1.4 | DTWD1     | 2.363636364 |
| ZBED51        | 5.22E-44 | 0.2232625 | 0.125 | 0.052 | 1.26E-39 | 1.4 | ZBED5     | 2.403846154 |
| ATP5F12       | 8.98E-44 | 0.2908184 | 0.515 | 0.356 | 2.16E-39 | 1.4 | ATP5F1    | 1.446629213 |
| FAM120C1      | 1.01E-43 | 0.208501  | 0.095 | 0.034 | 2.44E-39 | 1.4 | FAM120C   | 2.794117647 |
| MICU11        | 1.30E-43 | 0.3142903 | 0.307 | 0.181 | 3.14E-39 | 1.4 | MICU1     | 1.696132597 |
| FUT91         | 1.73E-43 | 0.1468712 | 0.055 | 0.014 | 4.16E-39 | 1.4 | FUT9      | 3.928571429 |
| SLC23A22      | 1.90E-43 | 0.1865179 | 0.088 | 0.031 | 4.57E-39 | 1.4 | SLC23A2   | 2.838709677 |
| G0S22         | 1.92E-43 | 0.138906  | 0.063 | 0.017 | 4.63E-39 | 1.4 | G0S2      | 3.705882353 |
| LSM52         | 1.99E-43 | 0.2669064 | 0.495 | 0.328 | 4.81E-39 | 1.4 | LSM5      | 1.509146341 |
| NIFK-AS11     | 2.04E-43 | 0.1665882 | 0.079 | 0.026 | 4.92E-39 | 1.4 | NIFK-AS1  | 3.038461538 |
| UQCRHL3       | 2.49E-43 | 0.2586223 | 0.293 | 0.17  | 6.01E-39 | 1.4 | UQCRHL    | 1.723529412 |
| CD471         | 2.93E-43 | 0.3660953 | 0.561 | 0.397 | 7.06E-39 | 1.4 | CD47      | 1.413098237 |
| PDE7A1        | 3.13E-43 | 0.3992215 | 0.357 | 0.226 | 7.54E-39 | 1.4 | PDE7A     | 1.579646018 |
| SAV12         | 3.57E-43 | 0.372064  | 0.421 | 0.28  | 8.61E-39 | 1.4 | SAV1      | 1.503571429 |
| MFSD14C2      | 3.98E-43 | 0.2736003 | 0.275 | 0.157 | 9.59E-39 | 1.4 | MFSD14C   | 1.751592357 |
| POU2F32       | 4.12E-43 | 0.306441  | 0.2   | 0.103 | 9.94E-39 | 1.4 | POU2F3    | 1.941747573 |
| ENKUR1        | 5.71E-43 | 0.1091524 | 0.042 | 0.009 | 1.38E-38 | 1.4 | ENKUR     | 4.666666667 |
| SGCE1         | 6.58E-43 | 0.2070159 | 0.097 | 0.036 | 1.59E-38 | 1.4 | SGCE      | 2.694444444 |
| NR2F21        | 7.18E-43 | 0.2112014 | 0.157 | 0.073 | 1.73E-38 | 1.4 | NR2F2     | 2.150684932 |
| NR3C22        | 1.02E-42 | 0.2660648 | 0.159 | 0.075 | 2.45E-38 | 1.4 | NR3C2     | 2.12        |
| ALDH9A1       | 1.37E-42 | 0.2137916 | 0.146 | 0.065 | 3.31E-38 | 1.4 | ALDH9A1   | 2.246153846 |
| TNFSF151      | 1.99E-42 | 0.1437386 | 0.054 | 0.014 | 4.79E-38 | 1.4 | TNFSF15   | 3.857142857 |
| CCAR11        | 2.00E-42 | 0.2958738 | 0.361 | 0.227 | 4.81E-38 | 1.4 | CCAR1     | 1.59030837  |
| FIBIN1        | 2.08E-42 | 0.1007818 | 0.031 | 0.005 | 5.01E-38 | 1.4 | FIBIN     | 6.2         |
| ACP13         | 2.34E-42 | 0.2867181 | 0.442 | 0.293 | 5.64E-38 | 1.4 | ACP1      | 1.508532423 |
| EIF2S33       | 2.92E-42 | 0.284957  | 0.424 | 0.276 | 7.04E-38 | 1.4 | EIF2S3    | 1.536231884 |
| RFX3-AS11     | 3.00E-42 | 0.2479958 | 0.126 | 0.054 | 7.23E-38 | 1.4 | RFX3-AS1  | 2.333333333 |
| RPS6KA51      | 3.02E-42 | 0.3278931 | 0.335 | 0.206 | 7.27E-38 | 1.4 | RPS6KA5   | 1.626213592 |
| DTX22         | 3.12E-42 | 0.2275034 | 0.135 | 0.059 | 7.53E-38 | 1.4 | DTX2      | 2.288135593 |
| NCALD2        | 3.29E-42 | 0.1854853 | 0.223 | 0.117 | 7.92E-38 | 1.4 | NCALD     | 1.905982906 |
| STEAP31       | 3.32E-42 | 0.1876625 | 0.071 | 0.022 | 8.00E-38 | 1.4 | STEAP3    | 3.227272727 |
| CRYBG33       | 3.50E-42 | 0.1927522 | 0.102 | 0.039 | 8.45E-38 | 1.4 | CRYBG3    | 2.615384615 |
| NEMF2         | 3.66E-42 | 0.2953348 | 0.39  | 0.249 | 8.82E-38 | 1.4 | NEMF      | 1.56626506  |
| PTCH11        | 3.69E-42 | 0.1187848 | 0.038 | 0.007 | 8.90E-38 | 1.4 | PTCH1     | 5.428571429 |
| KRCC11        | 3.88E-42 | 0.1924717 | 0.119 | 0.049 | 9.35E-38 | 1.4 | KRCC1     | 2.428571429 |
| ABC101        | 3.89E-42 | 0.1544907 | 0.081 | 0.027 | 9.37E-38 | 1.4 | ABC10     | 3           |

|                |          |           |       |       |          |     |           |             |
|----------------|----------|-----------|-------|-------|----------|-----|-----------|-------------|
| ERCC6L21       | 4.08E-42 | 0.2394411 | 0.139 | 0.062 | 9.83E-38 | 1.4 | ERCC6L2   | 2.241935484 |
| ZNF1331        | 4.14E-42 | 0.1414462 | 0.067 | 0.02  | 9.99E-38 | 1.4 | ZNF133    | 3.35        |
| NSRP12         | 4.60E-42 | 0.2662613 | 0.326 | 0.196 | 1.11E-37 | 1.4 | NSRP1     | 1.663265306 |
| HINT12         | 6.04E-42 | 0.3101607 | 0.721 | 0.587 | 1.46E-37 | 1.4 | HINT1     | 1.228279387 |
| CHSY3          | 6.90E-42 | 0.1932706 | 0.045 | 0.01  | 1.66E-37 | 1.4 | CHSY3     | 4.5         |
| ZER11          | 8.12E-42 | 0.2499287 | 0.161 | 0.077 | 1.96E-37 | 1.4 | ZER1      | 2.090909091 |
| ROR22          | 8.49E-42 | 0.268198  | 0.162 | 0.078 | 2.05E-37 | 1.4 | ROR2      | 2.076923077 |
| RALGDS1        | 1.17E-41 | 0.1910785 | 0.111 | 0.044 | 2.82E-37 | 1.4 | RALGDS    | 2.522727273 |
| HSPG22         | 1.22E-41 | 0.2514699 | 0.155 | 0.073 | 2.94E-37 | 1.4 | HSPG2     | 2.123287671 |
| RP5-1180E21.52 | 1.26E-41 | 0.1550907 | 0.064 | 0.019 | 3.03E-37 | 1.4 | RP5-1180E | 3.368421053 |
| NAP1L13        | 1.27E-41 | 0.2905794 | 0.495 | 0.341 | 3.05E-37 | 1.4 | NAP1L1    | 1.451612903 |
| PTAR11         | 2.18E-41 | 0.2308463 | 0.14  | 0.063 | 5.25E-37 | 1.4 | PTAR1     | 2.222222222 |
| TGM21          | 2.56E-41 | 0.1910834 | 0.179 | 0.088 | 6.17E-37 | 1.4 | TGM2      | 2.034090909 |
| LINC006231     | 2.95E-41 | 0.1714238 | 0.073 | 0.023 | 7.12E-37 | 1.4 | LINC00623 | 3.173913043 |
| HNRNPA13       | 3.17E-41 | 0.1861082 | 0.879 | 0.743 | 7.64E-37 | 1.4 | HNRNPA1   | 1.183041723 |
| HPS53          | 3.28E-41 | 0.2569914 | 0.232 | 0.127 | 7.90E-37 | 1.4 | HPS5      | 1.826771654 |
| HAX12          | 3.52E-41 | 0.265609  | 0.378 | 0.24  | 8.48E-37 | 1.4 | HAX1      | 1.575       |
| SDCBP3         | 4.54E-41 | 0.2598848 | 0.764 | 0.599 | 1.09E-36 | 1.4 | SDCBP     | 1.275459098 |
| CTSC1          | 5.54E-41 | 0.1798518 | 0.084 | 0.029 | 1.34E-36 | 1.4 | CTSC      | 2.896551724 |
| CELF23         | 6.19E-41 | 0.1986548 | 0.214 | 0.113 | 1.49E-36 | 1.4 | CELF2     | 1.89380531  |
| AP000998.21    | 7.58E-41 | 0.1334413 | 0.028 | 0.004 | 1.83E-36 | 1.4 | AP000998. | 7           |
| SOS22          | 8.14E-41 | 0.3015264 | 0.567 | 0.408 | 1.96E-36 | 1.4 | SOS2      | 1.389705882 |
| TSFM1          | 8.24E-41 | 0.1848495 | 0.1   | 0.038 | 1.99E-36 | 1.4 | TSFM      | 2.631578947 |
| PLEKHA73       | 1.09E-40 | 0.1796005 | 0.979 | 0.98  | 2.64E-36 | 1.4 | PLEKHA7   | 0.998979592 |
| FBXL41         | 1.15E-40 | 0.2097321 | 0.136 | 0.061 | 2.76E-36 | 1.4 | FBXL4     | 2.229508197 |
| NOL43          | 1.58E-40 | 0.1874099 | 0.067 | 0.021 | 3.81E-36 | 1.4 | NOL4      | 3.19047619  |
| ACSL11         | 1.59E-40 | 0.3068418 | 0.316 | 0.191 | 3.84E-36 | 1.4 | ACSL1     | 1.654450262 |
| RBM411         | 2.24E-40 | 0.1803991 | 0.143 | 0.065 | 5.40E-36 | 1.4 | RBM41     | 2.2         |
| TBCK1          | 2.25E-40 | 0.2852736 | 0.209 | 0.112 | 5.42E-36 | 1.4 | TBCK      | 1.866071429 |
| MRPL452        | 2.90E-40 | 0.2435137 | 0.242 | 0.135 | 6.98E-36 | 1.4 | MRPL45    | 1.792592593 |
| PPFIBP21       | 3.02E-40 | 0.2510016 | 0.138 | 0.062 | 7.28E-36 | 1.4 | PPFIBP2   | 2.225806452 |
| ATXN71         | 3.16E-40 | 0.2367407 | 0.192 | 0.099 | 7.62E-36 | 1.4 | ATXN7     | 1.939393939 |
| FAM49A3        | 3.55E-40 | 0.1693286 | 0.077 | 0.026 | 8.56E-36 | 1.4 | FAM49A    | 2.961538462 |
| HOOK21         | 3.85E-40 | 0.2897768 | 0.254 | 0.144 | 9.27E-36 | 1.4 | HOOK2     | 1.763888889 |
| C14orf1591     | 5.53E-40 | 0.1891173 | 0.12  | 0.051 | 1.33E-35 | 1.4 | C14orf159 | 2.352941176 |
| EGFLAM1        | 6.22E-40 | 0.1575915 | 0.052 | 0.013 | 1.50E-35 | 1.4 | EGFLAM    | 4           |
| CARF           | 7.19E-40 | 0.1714051 | 0.074 | 0.024 | 1.73E-35 | 1.4 | CARF      | 3.083333333 |
| PLSCR41        | 7.38E-40 | 0.2268057 | 0.109 | 0.045 | 1.78E-35 | 1.4 | PLSCR4    | 2.422222222 |
| UBE2E31        | 7.70E-40 | 0.2981261 | 0.273 | 0.159 | 1.86E-35 | 1.4 | UBE2E3    | 1.716981132 |
| C9orf91        | 9.86E-40 | 0.1653075 | 0.073 | 0.024 | 2.38E-35 | 1.4 | C9orf91   | 3.041666667 |
| RPL123         | 1.09E-39 | 0.3070262 | 0.411 | 0.271 | 2.64E-35 | 1.4 | RPL12     | 1.516605166 |
| POLK1          | 1.29E-39 | 0.2360345 | 0.198 | 0.103 | 3.11E-35 | 1.4 | POLK      | 1.922330097 |
| LRCH12         | 1.43E-39 | 0.3565287 | 0.429 | 0.288 | 3.45E-35 | 1.4 | LRCH1     | 1.489583333 |
| SNX25          | 1.45E-39 | 0.2473983 | 0.226 | 0.125 | 3.49E-35 | 1.4 | SNX2      | 1.808       |
| ZNF6301        | 1.65E-39 | 0.1607243 | 0.063 | 0.019 | 3.98E-35 | 1.4 | ZNF630    | 3.315789474 |
| SSPN1          | 1.97E-39 | 0.1940256 | 0.076 | 0.026 | 4.76E-35 | 1.4 | SSPN      | 2.923076923 |
| PLEKHG13       | 2.31E-39 | 0.2492733 | 0.183 | 0.094 | 5.58E-35 | 1.4 | PLEKHG1   | 1.946808511 |
| KDM7A3         | 2.49E-39 | 0.349284  | 0.394 | 0.26  | 6.02E-35 | 1.4 | KDM7A     | 1.515384615 |
| METTTL151      | 3.24E-39 | 0.2603919 | 0.216 | 0.117 | 7.82E-35 | 1.4 | METTTL15  | 1.846153846 |
| RSRP11         | 3.52E-39 | 0.3176631 | 0.374 | 0.241 | 8.48E-35 | 1.4 | RSRP1     | 1.55186722  |
| EPB41L23       | 3.83E-39 | 0.1871524 | 0.196 | 0.102 | 9.23E-35 | 1.4 | EPB41L2   | 1.921568627 |
| TAF151         | 4.53E-39 | 0.3219402 | 0.418 | 0.278 | 1.09E-34 | 1.4 | TAF15     | 1.503597122 |

|                |          |           |       |       |          |     |            |             |
|----------------|----------|-----------|-------|-------|----------|-----|------------|-------------|
| HPRT12         | 5.26E-39 | 0.2102201 | 0.095 | 0.036 | 1.27E-34 | 1.4 | HPRT1      | 2.638888889 |
| CCT31          | 8.34E-39 | 0.2894806 | 0.493 | 0.344 | 2.01E-34 | 1.4 | CCT3       | 1.433139535 |
| LARP71         | 8.43E-39 | 0.2468792 | 0.25  | 0.143 | 2.03E-34 | 1.4 | LARP7      | 1.748251748 |
| PNPLA31        | 9.47E-39 | 0.1858946 | 0.075 | 0.026 | 2.28E-34 | 1.4 | PNPLA3     | 2.884615385 |
| BPTF1          | 9.66E-39 | 0.3040048 | 0.465 | 0.321 | 2.33E-34 | 1.4 | BPTF       | 1.448598131 |
| TMCC11         | 9.77E-39 | 0.3198456 | 0.371 | 0.239 | 2.35E-34 | 1.4 | TMCC1      | 1.552301255 |
| SNRPB23        | 1.16E-38 | 0.252638  | 0.481 | 0.327 | 2.79E-34 | 1.4 | SNRPB2     | 1.470948012 |
| SS181          | 1.21E-38 | 0.2408709 | 0.229 | 0.127 | 2.91E-34 | 1.4 | SS18       | 1.803149606 |
| MAP2K51        | 1.32E-38 | 0.2826789 | 0.218 | 0.119 | 3.17E-34 | 1.4 | MAP2K5     | 1.831932773 |
| SP11           | 1.37E-38 | 0.2419611 | 0.209 | 0.112 | 3.31E-34 | 1.4 | SP1        | 1.866071429 |
| TCF7L21        | 1.68E-38 | 0.3124879 | 0.525 | 0.365 | 4.06E-34 | 1.4 | TCF7L2     | 1.438356164 |
| OTUD6B-AS11    | 1.70E-38 | 0.2329856 | 0.274 | 0.16  | 4.09E-34 | 1.4 | OTUD6B-A'  | 1.7125      |
| GPM6B3         | 2.27E-38 | 0.2421478 | 0.211 | 0.114 | 5.48E-34 | 1.4 | GPM6B      | 1.850877193 |
| RSL24D13       | 2.33E-38 | 0.2350963 | 0.709 | 0.541 | 5.62E-34 | 1.4 | RSL24D1    | 1.310536044 |
| RP11-230B22.11 | 2.55E-38 | 0.1253912 | 0.052 | 0.014 | 6.14E-34 | 1.4 | RP11-230B  | 3.714285714 |
| CTD-2315E11.1  | 2.78E-38 | 0.122018  | 0.05  | 0.013 | 6.71E-34 | 1.4 | CTD-2315E  | 3.846153846 |
| RPS53          | 2.86E-38 | 0.5111827 | 0.333 | 0.213 | 6.90E-34 | 1.4 | RPS5       | 1.563380282 |
| APOL31         | 3.52E-38 | 0.1256759 | 0.052 | 0.014 | 8.48E-34 | 1.4 | APOL3      | 3.714285714 |
| LINC005111     | 3.70E-38 | 0.3639807 | 0.15  | 0.073 | 8.92E-34 | 1.4 | LINC00511  | 2.054794521 |
| RPL13A2        | 3.90E-38 | 0.4853086 | 0.607 | 0.463 | 9.41E-34 | 1.4 | RPL13A     | 1.311015119 |
| MCCC11         | 4.17E-38 | 0.2144821 | 0.155 | 0.075 | 1.01E-33 | 1.4 | MCCC1      | 2.066666667 |
| MFSD61         | 4.75E-38 | 0.2335847 | 0.135 | 0.062 | 1.15E-33 | 1.4 | MFSD6      | 2.177419355 |
| UQCRC23        | 4.86E-38 | 0.2407618 | 0.463 | 0.314 | 1.17E-33 | 1.4 | UQCRC2     | 1.474522293 |
| TCHP1          | 5.27E-38 | 0.2391349 | 0.07  | 0.023 | 1.27E-33 | 1.4 | TCHP       | 3.043478261 |
| HOXA32         | 6.23E-38 | 0.1383349 | 0.062 | 0.019 | 1.50E-33 | 1.4 | HOXA3      | 3.263157895 |
| CDC25B1        | 6.78E-38 | 0.230304  | 0.078 | 0.028 | 1.64E-33 | 1.4 | CDC25B     | 2.785714286 |
| XPO41          | 7.61E-38 | 0.222633  | 0.195 | 0.103 | 1.83E-33 | 1.4 | XPO4       | 1.893203883 |
| TAMM411        | 7.93E-38 | 0.1565768 | 0.076 | 0.026 | 1.91E-33 | 1.4 | TAMM41     | 2.923076923 |
| DPH51          | 8.09E-38 | 0.167373  | 0.117 | 0.05  | 1.95E-33 | 1.4 | DPH5       | 2.34        |
| HOTAIRM13      | 9.41E-38 | 0.1687673 | 0.081 | 0.029 | 2.27E-33 | 1.4 | HOTAIRM1   | 2.793103448 |
| WWC11          | 1.05E-37 | 0.3432592 | 0.555 | 0.403 | 2.53E-33 | 1.4 | WWC1       | 1.377171216 |
| GPATCH81       | 1.17E-37 | 0.2922461 | 0.36  | 0.231 | 2.82E-33 | 1.4 | GPATCH8    | 1.558441558 |
| ZNF8273        | 1.31E-37 | 0.2244044 | 0.196 | 0.104 | 3.17E-33 | 1.4 | ZNF827     | 1.884615385 |
| TLN22          | 1.67E-37 | 0.2309065 | 0.127 | 0.057 | 4.01E-33 | 1.4 | TLN2       | 2.228070175 |
| GBP4           | 1.99E-37 | 0.1233994 | 0.045 | 0.011 | 4.80E-33 | 1.4 | GBP4       | 4.090909091 |
| GRAMD21        | 2.00E-37 | 0.1086986 | 0.038 | 0.008 | 4.81E-33 | 1.4 | GRAMD2     | 4.75        |
| GNB2L12        | 2.16E-37 | 0.3766948 | 0.756 | 0.662 | 5.20E-33 | 1.4 | GNB2L1     | 1.141993958 |
| APTX1          | 2.24E-37 | 0.2433761 | 0.212 | 0.116 | 5.41E-33 | 1.4 | APTX       | 1.827586207 |
| LINC009692     | 2.75E-37 | 0.2426749 | 0.313 | 0.194 | 6.63E-33 | 1.4 | LINC00969  | 1.613402062 |
| TRIM28         | 3.31E-37 | 0.2503088 | 0.269 | 0.159 | 7.98E-33 | 1.4 | TRIM2      | 1.691823899 |
| BHLHE413       | 3.35E-37 | 0.2222072 | 0.097 | 0.039 | 8.07E-33 | 1.4 | BHLHE41    | 2.487179487 |
| RP11-793A3.22  | 4.15E-37 | 0.158739  | 0.056 | 0.016 | 1.00E-32 | 1.4 | RP11-793A  | 3.5         |
| C8orf593       | 4.17E-37 | 0.2606905 | 0.407 | 0.272 | 1.01E-32 | 1.4 | C8orf59    | 1.496323529 |
| LINC013892     | 4.19E-37 | 0.1383656 | 0.055 | 0.015 | 1.01E-32 | 1.4 | LINC01389  | 3.666666667 |
| FBXO91         | 6.01E-37 | 0.1804144 | 0.126 | 0.056 | 1.45E-32 | 1.4 | FBXO9      | 2.25        |
| MIS18BP11      | 6.57E-37 | 0.233957  | 0.186 | 0.097 | 1.58E-32 | 1.4 | MIS18BP1   | 1.917525773 |
| DHRS7B1        | 1.06E-36 | 0.2053439 | 0.123 | 0.055 | 2.56E-32 | 1.4 | DHRS7B     | 2.236363636 |
| GTF2IRD2B      | 1.14E-36 | 0.2278348 | 0.15  | 0.073 | 2.74E-32 | 1.4 | GTF2IRD2B  | 2.054794521 |
| DIRC21         | 1.28E-36 | 0.2119886 | 0.116 | 0.051 | 3.09E-32 | 1.4 | DIRC2      | 2.274509804 |
| TCN11          | 1.31E-36 | 0.1784916 | 0.055 | 0.016 | 3.15E-32 | 1.4 | TCN1       | 3.4375      |
| PARVA1         | 1.45E-36 | 0.2541838 | 0.206 | 0.113 | 3.49E-32 | 1.4 | PARVA      | 1.82300885  |
| RP11-514P8.6   | 2.23E-36 | 0.1397352 | 0.071 | 0.024 | 5.39E-32 | 1.4 | RP11-514P8 | 2.958333333 |

|                 |          |           |       |       |          |     |           |             |
|-----------------|----------|-----------|-------|-------|----------|-----|-----------|-------------|
| PHKB1           | 2.38E-36 | 0.2696801 | 0.265 | 0.158 | 5.74E-32 | 1.4 | PHKB      | 1.67721519  |
| CHCHD33         | 2.47E-36 | 0.359896  | 0.885 | 0.831 | 5.96E-32 | 1.4 | CHCHD3    | 1.064981949 |
| BTN3A22         | 2.69E-36 | 0.1269489 | 0.06  | 0.018 | 6.49E-32 | 1.4 | BTN3A2    | 3.333333333 |
| ZFP141          | 2.78E-36 | 0.1792978 | 0.126 | 0.057 | 6.70E-32 | 1.4 | ZFP14     | 2.210526316 |
| PPA12           | 4.62E-36 | 0.2778366 | 0.32  | 0.201 | 1.11E-31 | 1.4 | PPA1      | 1.592039801 |
| CLEC2D1         | 5.83E-36 | 0.1982826 | 0.154 | 0.076 | 1.41E-31 | 1.4 | CLEC2D    | 2.026315789 |
| MNAT12          | 5.88E-36 | 0.2957299 | 0.391 | 0.262 | 1.42E-31 | 1.4 | MNAT1     | 1.492366412 |
| ORC31           | 6.00E-36 | 0.1963643 | 0.135 | 0.063 | 1.45E-31 | 1.4 | ORC3      | 2.142857143 |
| KB-1991G8.12    | 6.57E-36 | 0.1014668 | 0.038 | 0.008 | 1.59E-31 | 1.4 | KB-1991G8 | 4.75        |
| RFTN21          | 7.26E-36 | 0.168744  | 0.042 | 0.01  | 1.75E-31 | 1.4 | RFTN2     | 4.2         |
| PEX33           | 7.84E-36 | 0.2110772 | 0.103 | 0.043 | 1.89E-31 | 1.4 | PEX3      | 2.395348837 |
| YIPF41          | 8.77E-36 | 0.2135449 | 0.147 | 0.072 | 2.11E-31 | 1.4 | YIPF4     | 2.041666667 |
| RPL133          | 9.23E-36 | 0.3580428 | 0.543 | 0.404 | 2.22E-31 | 1.4 | RPL13     | 1.344059406 |
| LETMD11         | 9.59E-36 | 0.1859953 | 0.122 | 0.055 | 2.31E-31 | 1.4 | LETMD1    | 2.218181818 |
| POLR2F1         | 1.16E-35 | 0.2228754 | 0.115 | 0.051 | 2.79E-31 | 1.4 | POLR2F    | 2.254901961 |
| ADAMTS101       | 1.46E-35 | 0.1112346 | 0.038 | 0.008 | 3.53E-31 | 1.4 | ADAMTS10  | 4.75        |
| PDE9A2          | 1.52E-35 | 0.1933349 | 0.089 | 0.035 | 3.67E-31 | 1.4 | PDE9A     | 2.542857143 |
| MCEE            | 1.90E-35 | 0.1425202 | 0.069 | 0.023 | 4.59E-31 | 1.4 | MCEE      | 3           |
| CCDC71L1        | 2.03E-35 | 0.1380742 | 0.069 | 0.023 | 4.89E-31 | 1.4 | CCDC71L   | 3           |
| ASAP31          | 2.16E-35 | 0.132468  | 0.062 | 0.02  | 5.21E-31 | 1.4 | ASAP3     | 3.1         |
| CBR42           | 2.27E-35 | 0.2381112 | 0.347 | 0.221 | 5.48E-31 | 1.4 | CBR4      | 1.570135747 |
| FDPS1           | 2.79E-35 | 0.2515426 | 0.582 | 0.438 | 6.74E-31 | 1.4 | FDPS      | 1.328767123 |
| CDC261          | 2.89E-35 | 0.2347167 | 0.282 | 0.17  | 6.97E-31 | 1.4 | CDC26     | 1.658823529 |
| KARS3           | 3.96E-35 | 0.2537286 | 0.357 | 0.233 | 9.54E-31 | 1.4 | KARS      | 1.532188841 |
| CHD92           | 4.03E-35 | 0.2980693 | 0.532 | 0.386 | 9.71E-31 | 1.4 | CHD9      | 1.378238342 |
| THOC71          | 4.25E-35 | 0.1793879 | 0.144 | 0.07  | 1.02E-30 | 1.4 | THOC7     | 2.057142857 |
| LINC011371      | 5.93E-35 | 0.1833511 | 0.111 | 0.049 | 1.43E-30 | 1.4 | LINC01137 | 2.265306122 |
| MBP2            | 6.26E-35 | 0.208394  | 0.196 | 0.106 | 1.51E-30 | 1.4 | MBP       | 1.849056604 |
| DIS3L21         | 6.72E-35 | 0.2391497 | 0.169 | 0.088 | 1.62E-30 | 1.4 | DIS3L2    | 1.920454545 |
| CXCL162         | 6.74E-35 | 0.2342811 | 0.228 | 0.13  | 1.62E-30 | 1.4 | CXCL16    | 1.753846154 |
| CCDC125         | 7.21E-35 | 0.2104782 | 0.126 | 0.058 | 1.74E-30 | 1.4 | CCDC125   | 2.172413793 |
| GBAS1           | 7.76E-35 | 0.2317181 | 0.268 | 0.161 | 1.87E-30 | 1.4 | GBAS      | 1.664596273 |
| CCDC170         | 8.95E-35 | 0.2336947 | 0.113 | 0.05  | 2.16E-30 | 1.4 | CCDC170   | 2.26        |
| TMEM108         | 9.29E-35 | 0.1876842 | 0.042 | 0.011 | 2.24E-30 | 1.4 | TMEM108   | 3.818181818 |
| RP11-410L14.21  | 9.48E-35 | 0.1201186 | 0.052 | 0.015 | 2.29E-30 | 1.4 | RP11-410L | 3.466666667 |
| SH3BP52         | 9.70E-35 | 0.181032  | 0.111 | 0.049 | 2.34E-30 | 1.4 | SH3BP5    | 2.265306122 |
| COL22A12        | 1.08E-34 | 0.1411236 | 0.048 | 0.013 | 2.60E-30 | 1.4 | COL22A1   | 3.692307692 |
| PLRG11          | 1.09E-34 | 0.1918291 | 0.148 | 0.073 | 2.62E-30 | 1.4 | PLRG1     | 2.02739726  |
| UFL11           | 1.09E-34 | 0.1968244 | 0.107 | 0.046 | 2.63E-30 | 1.4 | UFL1      | 2.326086957 |
| TJP23           | 1.69E-34 | 0.2280188 | 0.45  | 0.306 | 4.08E-30 | 1.4 | TJP2      | 1.470588235 |
| RHPN22          | 1.70E-34 | 0.2522928 | 0.35  | 0.226 | 4.10E-30 | 1.4 | RHPN2     | 1.548672566 |
| ZNF7101         | 2.36E-34 | 0.2162448 | 0.161 | 0.083 | 5.70E-30 | 1.4 | ZNF710    | 1.939759036 |
| CH507-528H12.11 | 2.52E-34 | 0.129481  | 0.063 | 0.021 | 6.07E-30 | 1.4 | CH507-528 | 3           |
| SLC12A81        | 2.53E-34 | 0.1400282 | 0.072 | 0.025 | 6.10E-30 | 1.4 | SLC12A8   | 2.88        |
| GUCY1B31        | 2.94E-34 | 0.126529  | 0.047 | 0.013 | 7.09E-30 | 1.4 | GUCY1B3   | 3.615384615 |
| MPHOSPH81       | 3.61E-34 | 0.2332902 | 0.239 | 0.139 | 8.72E-30 | 1.4 | MPHOSPH8  | 1.71942446  |
| MDH12           | 4.23E-34 | 0.2855033 | 0.391 | 0.262 | 1.02E-29 | 1.4 | MDH1      | 1.492366412 |
| CADM11          | 5.44E-34 | 0.2545152 | 0.139 | 0.067 | 1.31E-29 | 1.4 | CADM1     | 2.074626866 |
| MRPS141         | 5.56E-34 | 0.1935722 | 0.214 | 0.12  | 1.34E-29 | 1.4 | MRPS14    | 1.783333333 |
| ZBTB332         | 6.20E-34 | 0.1266444 | 0.07  | 0.025 | 1.50E-29 | 1.4 | ZBTB33    | 2.8         |
| RPL310          | 7.96E-34 | 0.3974429 | 0.42  | 0.29  | 1.92E-29 | 1.4 | RPL3      | 1.448275862 |
| GLUL            | 8.06E-34 | 0.3848798 | 0.494 | 0.363 | 1.94E-29 | 1.4 | GLUL      | 1.360881543 |

|                |          |           |       |       |          |     |           |             |
|----------------|----------|-----------|-------|-------|----------|-----|-----------|-------------|
| CTC-254B4.12   | 9.12E-34 | 0.134947  | 0.047 | 0.013 | 2.20E-29 | 1.4 | CTC-254B4 | 3.615384615 |
| RP1-167A14.2   | 1.30E-33 | 0.1986838 | 0.106 | 0.046 | 3.14E-29 | 1.4 | RP1-167A1 | 2.304347826 |
| MBOAT21        | 1.42E-33 | 0.222622  | 0.159 | 0.082 | 3.42E-29 | 1.4 | MBOAT2    | 1.93902439  |
| LRSAM11        | 1.61E-33 | 0.2217117 | 0.162 | 0.084 | 3.88E-29 | 1.4 | LRSAM1    | 1.928571429 |
| RNF243         | 1.61E-33 | 0.2582564 | 0.456 | 0.317 | 3.89E-29 | 1.4 | RNF24     | 1.438485804 |
| SNHG83         | 1.90E-33 | 0.2132673 | 0.335 | 0.213 | 4.59E-29 | 1.4 | SNHG8     | 1.572769953 |
| ITPKB2         | 2.07E-33 | 0.1636212 | 0.091 | 0.037 | 4.99E-29 | 1.4 | ITPKB     | 2.459459459 |
| SUGT11         | 2.28E-33 | 0.1979192 | 0.186 | 0.1   | 5.51E-29 | 1.4 | SUGT1     | 1.86        |
| RP11-666F17.11 | 2.31E-33 | 0.1312307 | 0.052 | 0.015 | 5.57E-29 | 1.4 | RP11-666F | 3.466666667 |
| TTC231         | 2.41E-33 | 0.1685553 | 0.102 | 0.044 | 5.81E-29 | 1.4 | TTC23     | 2.318181818 |
| TRAPPC111      | 2.75E-33 | 0.1778036 | 0.1   | 0.043 | 6.62E-29 | 1.4 | TRAPPC11  | 2.325581395 |
| ZNF2601        | 2.79E-33 | 0.1518037 | 0.138 | 0.067 | 6.73E-29 | 1.4 | ZNF260    | 2.059701493 |
| CARD141        | 2.98E-33 | 0.1390103 | 0.059 | 0.019 | 7.19E-29 | 1.4 | CARD14    | 3.105263158 |
| HSDL21         | 3.22E-33 | 0.2071167 | 0.151 | 0.077 | 7.76E-29 | 1.4 | HSDL2     | 1.961038961 |
| C15orf521      | 4.48E-33 | 0.1399649 | 0.064 | 0.022 | 1.08E-28 | 1.4 | C15orf52  | 2.909090909 |
| RP11-106M3.21  | 4.64E-33 | 0.1519358 | 0.076 | 0.028 | 1.12E-28 | 1.4 | RP11-106M | 2.714285714 |
| MAP3K51        | 8.39E-33 | 0.2081118 | 0.502 | 0.35  | 2.02E-28 | 1.4 | MAP3K5    | 1.434285714 |
| RP11-572M11.41 | 1.05E-32 | 0.1078819 | 0.041 | 0.01  | 2.54E-28 | 1.4 | RP11-572M | 4.1         |
| AL592183.11    | 1.14E-32 | 0.1997437 | 0.126 | 0.06  | 2.74E-28 | 1.4 | AL592183. | 2.1         |
| GPRIN31        | 1.22E-32 | 0.1258443 | 0.046 | 0.013 | 2.94E-28 | 1.4 | GPRIN3    | 3.538461538 |
| FAM172A3       | 1.28E-32 | 0.251803  | 0.737 | 0.603 | 3.08E-28 | 1.4 | FAM172A   | 1.222222222 |
| PHF21A1        | 1.32E-32 | 0.2891587 | 0.346 | 0.226 | 3.17E-28 | 1.4 | PHF21A    | 1.530973451 |
| LDLRAD31       | 1.38E-32 | 0.3415418 | 0.341 | 0.226 | 3.33E-28 | 1.4 | LDLRAD3   | 1.508849558 |
| MMP242         | 1.40E-32 | 0.1913293 | 0.153 | 0.078 | 3.38E-28 | 1.4 | MMP24     | 1.961538462 |
| MGST32         | 1.41E-32 | 0.2761603 | 0.555 | 0.409 | 3.40E-28 | 1.4 | MGST3     | 1.356968215 |
| GOSR11         | 1.51E-32 | 0.2053544 | 0.237 | 0.139 | 3.65E-28 | 1.4 | GOSR1     | 1.705035971 |
| GTF2IRD21      | 1.70E-32 | 0.2269021 | 0.142 | 0.071 | 4.11E-28 | 1.4 | GTF2IRD2  | 2           |
| RP11-711K1.81  | 1.92E-32 | 0.2266707 | 0.102 | 0.045 | 4.63E-28 | 1.4 | RP11-711K | 2.266666667 |
| RAB30-AS11     | 3.39E-32 | 0.2121299 | 0.14  | 0.07  | 8.16E-28 | 1.4 | RAB30-AS1 | 2           |
| MTRNR2L14      | 3.85E-32 | 0.2122554 | 0.191 | 0.106 | 9.27E-28 | 1.4 | MTRNR2L1  | 1.801886792 |
| CCDC251        | 4.42E-32 | 0.1610953 | 0.164 | 0.085 | 1.07E-27 | 1.4 | CCDC25    | 1.929411765 |
| TTC39B1        | 4.78E-32 | 0.2045008 | 0.16  | 0.084 | 1.15E-27 | 1.4 | TTC39B    | 1.904761905 |
| GLIS33         | 4.82E-32 | 0.1964182 | 0.251 | 0.149 | 1.16E-27 | 1.4 | GLIS3     | 1.684563758 |
| CMTM82         | 5.59E-32 | 0.2817329 | 0.255 | 0.156 | 1.35E-27 | 1.4 | CMTM8     | 1.634615385 |
| DCLK21         | 6.45E-32 | 0.1522877 | 0.066 | 0.023 | 1.55E-27 | 1.4 | DCLK2     | 2.869565217 |
| MGST12         | 7.74E-32 | 0.2213093 | 0.909 | 0.854 | 1.87E-27 | 1.4 | MGST1     | 1.06440281  |
| OSBPL1A        | 7.98E-32 | 0.1312673 | 0.266 | 0.161 | 1.92E-27 | 1.4 | OSBPL1A   | 1.652173913 |
| PPM1L1         | 8.53E-32 | 0.2109791 | 0.136 | 0.067 | 2.06E-27 | 1.4 | PPM1L     | 2.029850746 |
| KIF1B3         | 1.25E-31 | 0.2315589 | 0.538 | 0.388 | 3.01E-27 | 1.4 | KIF1B     | 1.386597938 |
| PIK3IP11       | 1.42E-31 | 0.1548444 | 0.119 | 0.056 | 3.43E-27 | 1.4 | PIK3IP1   | 2.125       |
| LINC015541     | 1.63E-31 | 0.1011326 | 0.033 | 0.007 | 3.93E-27 | 1.4 | LINC01554 | 4.714285714 |
| EXT12          | 1.93E-31 | 0.2454286 | 0.622 | 0.482 | 4.66E-27 | 1.4 | EXT1      | 1.290456432 |
| KDM3B1         | 2.09E-31 | 0.2014544 | 0.246 | 0.147 | 5.05E-27 | 1.4 | KDM3B     | 1.673469388 |
| XYLT12         | 2.42E-31 | 0.261201  | 0.147 | 0.075 | 5.84E-27 | 1.4 | XYLT1     | 1.96        |
| DHCR241        | 2.54E-31 | 0.2269122 | 0.283 | 0.177 | 6.13E-27 | 1.4 | DHCR24    | 1.598870056 |
| GRIN2B         | 2.79E-31 | 0.1646964 | 0.061 | 0.021 | 6.72E-27 | 1.4 | GRIN2B    | 2.904761905 |
| TKT1           | 2.86E-31 | 0.188083  | 0.173 | 0.094 | 6.90E-27 | 1.4 | TKT       | 1.840425532 |
| TAF72          | 3.03E-31 | 0.2160352 | 0.188 | 0.105 | 7.30E-27 | 1.4 | TAF7      | 1.79047619  |
| ZNF433         | 3.16E-31 | 0.227306  | 0.213 | 0.124 | 7.63E-27 | 1.4 | ZNF43     | 1.717741935 |
| RP11-180I4.21  | 3.51E-31 | 0.1050271 | 0.041 | 0.011 | 8.47E-27 | 1.4 | RP11-180I | 3.727272727 |
| MSH31          | 3.58E-31 | 0.2887077 | 0.17  | 0.092 | 8.63E-27 | 1.4 | MSH3      | 1.847826087 |
| FOXC13         | 3.73E-31 | 0.1217846 | 0.081 | 0.032 | 8.99E-27 | 1.4 | FOXC1     | 2.53125     |

|                |          |           |       |       |          |     |            |             |
|----------------|----------|-----------|-------|-------|----------|-----|------------|-------------|
| MPPED21        | 3.77E-31 | 0.1148753 | 0.038 | 0.009 | 9.08E-27 | 1.4 | MPPED2     | 4.222222222 |
| PTPN143        | 3.99E-31 | 0.1439474 | 0.424 | 0.287 | 9.62E-27 | 1.4 | PTPN14     | 1.477351916 |
| CYP4A22-AS11   | 4.48E-31 | 0.111607  | 0.041 | 0.011 | 1.08E-26 | 1.4 | CYP4A22-A  | 3.727272727 |
| CUL51          | 4.62E-31 | 0.226927  | 0.195 | 0.111 | 1.12E-26 | 1.4 | CUL5       | 1.756756757 |
| GRHL21         | 4.70E-31 | 0.2337241 | 0.395 | 0.27  | 1.13E-26 | 1.4 | GRHL2      | 1.462962963 |
| FAM60A3        | 5.50E-31 | 0.2870071 | 0.422 | 0.296 | 1.33E-26 | 1.4 | FAM60A     | 1.425675676 |
| QRSL11         | 5.58E-31 | 0.1601469 | 0.108 | 0.049 | 1.35E-26 | 1.4 | QRSL1      | 2.204081633 |
| ARSB1          | 5.69E-31 | 0.1819555 | 0.071 | 0.027 | 1.37E-26 | 1.4 | ARSB       | 2.62962963  |
| CLSTN31        | 6.32E-31 | 0.2041773 | 0.082 | 0.033 | 1.52E-26 | 1.4 | CLSTN3     | 2.484848485 |
| RP11-452L6.11  | 6.67E-31 | 0.1299495 | 0.066 | 0.023 | 1.61E-26 | 1.4 | RP11-452L6 | 2.869565217 |
| RPRD21         | 6.96E-31 | 0.245545  | 0.232 | 0.139 | 1.68E-26 | 1.4 | RPRD2      | 1.669064748 |
| HSPA82         | 7.25E-31 | 0.2137313 | 0.591 | 0.442 | 1.75E-26 | 1.4 | HSPA8      | 1.337104072 |
| ENOX21         | 1.10E-30 | 0.2056735 | 0.093 | 0.04  | 2.65E-26 | 1.4 | ENOX2      | 2.325       |
| PHC31          | 1.14E-30 | 0.2108378 | 0.26  | 0.159 | 2.74E-26 | 1.4 | PHC3       | 1.635220126 |
| SP140L1        | 1.14E-30 | 0.1393249 | 0.073 | 0.028 | 2.76E-26 | 1.4 | SP140L     | 2.607142857 |
| AC008074.32    | 1.18E-30 | 0.1733136 | 0.1   | 0.044 | 2.84E-26 | 1.4 | AC008074.  | 2.272727273 |
| PRKRIP11       | 1.19E-30 | 0.2079238 | 0.199 | 0.113 | 2.87E-26 | 1.4 | PRKRIP1    | 1.761061947 |
| AC023590.11    | 1.45E-30 | 0.1247908 | 0.066 | 0.024 | 3.50E-26 | 1.4 | AC023590.  | 2.75        |
| SLC38A61       | 1.72E-30 | 0.1378577 | 0.071 | 0.027 | 4.15E-26 | 1.4 | SLC38A6    | 2.62962963  |
| RNASE11        | 1.73E-30 | 0.121195  | 0.053 | 0.017 | 4.18E-26 | 1.4 | RNASE1     | 3.117647059 |
| IGBP12         | 1.86E-30 | 0.2220578 | 0.524 | 0.38  | 4.48E-26 | 1.4 | IGBP1      | 1.378947368 |
| BBX1           | 2.02E-30 | 0.2493247 | 0.527 | 0.385 | 4.86E-26 | 1.4 | BBX        | 1.368831169 |
| CEBPZOS1       | 2.04E-30 | 0.1722843 | 0.19  | 0.107 | 4.92E-26 | 1.4 | CEBPZOS    | 1.775700935 |
| NSMCE21        | 2.07E-30 | 0.2128266 | 0.509 | 0.366 | 4.98E-26 | 1.4 | NSMCE2     | 1.390710383 |
| ADH52          | 2.18E-30 | 0.1630774 | 0.15  | 0.077 | 5.26E-26 | 1.4 | ADH5       | 1.948051948 |
| BCL7A2         | 2.34E-30 | 0.1297197 | 0.067 | 0.024 | 5.64E-26 | 1.4 | BCL7A      | 2.791666667 |
| PPIP5K11       | 2.48E-30 | 0.156765  | 0.075 | 0.029 | 5.97E-26 | 1.4 | PPIP5K1    | 2.586206897 |
| PSME22         | 2.59E-30 | 0.4337565 | 0.393 | 0.281 | 6.26E-26 | 1.4 | PSME2      | 1.398576512 |
| DOCK11         | 2.75E-30 | 0.2762589 | 0.401 | 0.278 | 6.62E-26 | 1.4 | DOCK1      | 1.442446043 |
| GRB143         | 2.77E-30 | 0.2442041 | 0.53  | 0.394 | 6.67E-26 | 1.4 | GRB14      | 1.345177665 |
| XRN1           | 3.25E-30 | 0.2745438 | 0.425 | 0.297 | 7.84E-26 | 1.4 | XRN1       | 1.430976431 |
| TYW1B2         | 3.58E-30 | 0.2426281 | 0.209 | 0.121 | 8.62E-26 | 1.4 | TYW1B      | 1.727272727 |
| TIMM93         | 4.22E-30 | 0.1466351 | 0.22  | 0.127 | 1.02E-25 | 1.4 | TIMM9      | 1.732283465 |
| MLXIP2         | 4.41E-30 | 0.2102246 | 0.216 | 0.126 | 1.06E-25 | 1.4 | MLXIP      | 1.714285714 |
| FOXP21         | 4.63E-30 | 0.1353669 | 0.056 | 0.018 | 1.12E-25 | 1.4 | FOXP2      | 3.111111111 |
| LMF11          | 5.25E-30 | 0.1342847 | 0.071 | 0.027 | 1.27E-25 | 1.4 | LMF1       | 2.62962963  |
| RP11-544A12.81 | 5.61E-30 | 0.1490642 | 0.07  | 0.026 | 1.35E-25 | 1.4 | RP11-544A  | 2.692307692 |
| MMADHC2        | 5.92E-30 | 0.2155259 | 0.426 | 0.294 | 1.43E-25 | 1.4 | MMADHC     | 1.448979592 |
| PDCD4          | 7.53E-30 | 0.2976861 | 0.341 | 0.229 | 1.82E-25 | 1.4 | PDCD4      | 1.489082969 |
| RP11-283G6.41  | 8.84E-30 | 0.1131558 | 0.038 | 0.01  | 2.13E-25 | 1.4 | RP11-283G  | 3.8         |
| SLC25A61       | 9.15E-30 | 0.3034087 | 0.186 | 0.106 | 2.21E-25 | 1.4 | SLC25A6    | 1.754716981 |
| TRIM51         | 9.17E-30 | 0.2640277 | 0.19  | 0.109 | 2.21E-25 | 1.4 | TRIM5      | 1.743119266 |
| PARN1          | 1.21E-29 | 0.2034688 | 0.146 | 0.076 | 2.91E-25 | 1.4 | PARN       | 1.921052632 |
| CXADR2         | 1.28E-29 | 0.2609293 | 0.269 | 0.169 | 3.09E-25 | 1.4 | CXADR      | 1.591715976 |
| DYNLT11        | 1.29E-29 | 0.2084117 | 0.735 | 0.577 | 3.10E-25 | 1.4 | DYNLT1     | 1.273830156 |
| PLEKHH23       | 1.36E-29 | 0.206836  | 0.122 | 0.06  | 3.28E-25 | 1.4 | PLEKHH2    | 2.033333333 |
| DPYD-AS11      | 1.48E-29 | 0.2391637 | 0.135 | 0.069 | 3.57E-25 | 1.4 | DPYD-AS1   | 1.956521739 |
| ZCCHC112       | 1.57E-29 | 0.2034546 | 0.308 | 0.197 | 3.78E-25 | 1.4 | ZCCHC11    | 1.563451777 |
| ESR1           | 1.60E-29 | 0.2595442 | 0.277 | 0.175 | 3.85E-25 | 1.4 | ESR1       | 1.582857143 |
| C6orf891       | 1.97E-29 | 0.1577341 | 0.118 | 0.057 | 4.75E-25 | 1.4 | C6orf89    | 2.070175439 |
| GTF3C31        | 2.01E-29 | 0.1501869 | 0.103 | 0.047 | 4.83E-25 | 1.4 | GTF3C3     | 2.191489362 |
| SRSF123        | 2.01E-29 | 0.1162262 | 0.088 | 0.037 | 4.85E-25 | 1.4 | SRSF12     | 2.378378378 |

|               |          |           |       |       |          |     |           |             |
|---------------|----------|-----------|-------|-------|----------|-----|-----------|-------------|
| C7orf491      | 2.07E-29 | 0.1351584 | 0.055 | 0.018 | 4.99E-25 | 1.4 | C7orf49   | 3.055555556 |
| RNF1801       | 2.14E-29 | 0.1502801 | 0.059 | 0.021 | 5.15E-25 | 1.4 | RNF180    | 2.80952381  |
| CEACAM12      | 2.37E-29 | 0.193449  | 0.136 | 0.07  | 5.71E-25 | 1.4 | CEACAM1   | 1.942857143 |
| RRAGD3        | 2.54E-29 | 0.1319368 | 0.103 | 0.047 | 6.13E-25 | 1.4 | RRAGD     | 2.191489362 |
| WFDC32        | 2.54E-29 | 0.1814218 | 0.12  | 0.058 | 6.13E-25 | 1.4 | WFDC3     | 2.068965517 |
| PSMA33        | 2.58E-29 | 0.2729103 | 0.453 | 0.324 | 6.22E-25 | 1.4 | PSMA3     | 1.398148148 |
| EIF4B3        | 2.70E-29 | 0.2055705 | 0.51  | 0.366 | 6.51E-25 | 1.4 | EIF4B     | 1.393442623 |
| CHKA1         | 3.09E-29 | 0.2472796 | 0.177 | 0.099 | 7.46E-25 | 1.4 | CHKA      | 1.787878788 |
| PRKAG21       | 3.28E-29 | 0.3140865 | 0.23  | 0.141 | 7.92E-25 | 1.4 | PRKAG2    | 1.631205674 |
| LRP51         | 3.39E-29 | 0.1348723 | 0.064 | 0.023 | 8.17E-25 | 1.4 | LRP5      | 2.782608696 |
| PCID21        | 3.42E-29 | 0.1827486 | 0.158 | 0.085 | 8.25E-25 | 1.4 | PCID2     | 1.858823529 |
| HIST1H2AC1    | 3.52E-29 | 0.302879  | 0.483 | 0.352 | 8.48E-25 | 1.4 | HIST1H2AC | 1.372159091 |
| RPS93         | 3.66E-29 | 0.69796   | 0.324 | 0.218 | 8.82E-25 | 1.4 | RPS9      | 1.486238532 |
| PITPNA1       | 3.72E-29 | 0.2296728 | 0.214 | 0.127 | 8.96E-25 | 1.4 | PITPNA    | 1.68503937  |
| DDX12         | 3.83E-29 | 0.1625398 | 0.163 | 0.088 | 9.23E-25 | 1.4 | DDX1      | 1.852272727 |
| CRHR11        | 4.87E-29 | 0.1659429 | 0.079 | 0.032 | 1.17E-24 | 1.4 | CRHR1     | 2.46875     |
| VPS451        | 5.87E-29 | 0.1979407 | 0.138 | 0.071 | 1.41E-24 | 1.4 | VPS45     | 1.943661972 |
| JAZF12        | 5.93E-29 | 0.2163272 | 0.15  | 0.079 | 1.43E-24 | 1.4 | JAZF1     | 1.898734177 |
| POLR1D3       | 7.71E-29 | 0.210162  | 0.324 | 0.214 | 1.86E-24 | 1.4 | POLR1D    | 1.514018692 |
| RP11-577H5.51 | 8.74E-29 | 0.1667393 | 0.104 | 0.048 | 2.11E-24 | 1.4 | RP11-577H | 2.166666667 |
| SERPINA3      | 9.97E-29 | 0.3934544 | 0.365 | 0.253 | 2.40E-24 | 1.4 | SERPINA3  | 1.442687747 |
| INPP5B1       | 1.14E-28 | 0.1366761 | 0.084 | 0.035 | 2.74E-24 | 1.4 | INPP5B    | 2.4         |
| ZNF1061       | 1.14E-28 | 0.1678563 | 0.175 | 0.097 | 2.76E-24 | 1.4 | ZNF106    | 1.804123711 |
| MRPS332       | 1.18E-28 | 0.174851  | 0.345 | 0.228 | 2.85E-24 | 1.4 | MRPS33    | 1.513157895 |
| PPP1CB2       | 1.23E-28 | 0.2394019 | 0.473 | 0.34  | 2.97E-24 | 1.4 | PPP1CB    | 1.391176471 |
| STX122        | 1.30E-28 | 0.1736103 | 0.44  | 0.307 | 3.14E-24 | 1.4 | STX12     | 1.433224756 |
| CREG12        | 1.32E-28 | 0.1439752 | 0.101 | 0.046 | 3.19E-24 | 1.4 | CREG1     | 2.195652174 |
| BACE23        | 1.60E-28 | 0.1891193 | 0.427 | 0.298 | 3.86E-24 | 1.4 | BACE2     | 1.432885906 |
| NEK91         | 1.88E-28 | 0.1587217 | 0.121 | 0.06  | 4.53E-24 | 1.4 | NEK9      | 2.016666667 |
| PM20D22       | 1.99E-28 | 0.1736289 | 0.153 | 0.082 | 4.81E-24 | 1.4 | PM20D2    | 1.865853659 |
| NAA381        | 2.20E-28 | 0.19504   | 0.109 | 0.052 | 5.30E-24 | 1.4 | NAA38     | 2.096153846 |
| ELOVL61       | 2.30E-28 | 0.1954682 | 0.135 | 0.07  | 5.54E-24 | 1.4 | ELOVL6    | 1.928571429 |
| GCA1          | 2.32E-28 | 0.1547901 | 0.097 | 0.044 | 5.60E-24 | 1.4 | GCA       | 2.204545455 |
| KLHL201       | 2.47E-28 | 0.1471337 | 0.113 | 0.054 | 5.96E-24 | 1.4 | KLHL20    | 2.092592593 |
| MTMR22        | 2.48E-28 | 0.1978938 | 0.127 | 0.064 | 5.98E-24 | 1.4 | MTMR2     | 1.984375    |
| SNX31         | 2.49E-28 | 0.1899137 | 0.25  | 0.154 | 6.01E-24 | 1.4 | SNX3      | 1.623376623 |
| CLCN31        | 2.50E-28 | 0.212831  | 0.253 | 0.158 | 6.03E-24 | 1.4 | CLCN3     | 1.601265823 |
| ADRBK22       | 2.74E-28 | 0.2046748 | 0.142 | 0.075 | 6.62E-24 | 1.4 | ADRBK2    | 1.893333333 |
| SULF2         | 3.25E-28 | 0.22769   | 0.179 | 0.101 | 7.83E-24 | 1.4 | SULF2     | 1.772277228 |
| PDSS21        | 3.62E-28 | 0.254135  | 0.2   | 0.117 | 8.72E-24 | 1.4 | PDSS2     | 1.709401709 |
| ZNF5651       | 3.64E-28 | 0.1924238 | 0.24  | 0.146 | 8.77E-24 | 1.4 | ZNF565    | 1.643835616 |
| SLC6A143      | 3.78E-28 | 0.2002602 | 0.173 | 0.097 | 9.13E-24 | 1.4 | SLC6A14   | 1.783505155 |
| ZFR2          | 4.04E-28 | 0.2377914 | 0.437 | 0.31  | 9.74E-24 | 1.4 | ZFR       | 1.409677419 |
| CD822         | 5.49E-28 | 0.1695636 | 0.1   | 0.046 | 1.32E-23 | 1.4 | CD82      | 2.173913043 |
| TMEM150C3     | 5.61E-28 | 0.1948963 | 0.302 | 0.195 | 1.35E-23 | 1.4 | TMEM150C  | 1.548717949 |
| LMO41         | 5.62E-28 | 0.1863628 | 0.143 | 0.075 | 1.35E-23 | 1.4 | LMO4      | 1.906666667 |
| PPP2R1B       | 5.65E-28 | 0.1948465 | 0.154 | 0.083 | 1.36E-23 | 1.4 | PPP2R1B   | 1.855421687 |
| BTN2A2        | 5.84E-28 | 0.1446674 | 0.084 | 0.036 | 1.41E-23 | 1.4 | BTN2A2    | 2.333333333 |
| TASP11        | 6.29E-28 | 0.2018469 | 0.206 | 0.122 | 1.52E-23 | 1.4 | TASP1     | 1.68852459  |
| MCTS12        | 7.38E-28 | 0.1722549 | 0.315 | 0.204 | 1.78E-23 | 1.4 | MCTS1     | 1.544117647 |
| ZNF6081       | 7.84E-28 | 0.247252  | 0.267 | 0.17  | 1.89E-23 | 1.4 | ZNF608    | 1.570588235 |
| LINC012521    | 8.79E-28 | 0.1353819 | 0.064 | 0.024 | 2.12E-23 | 1.4 | LINC01252 | 2.666666667 |

|               |          |           |       |       |          |     |           |             |
|---------------|----------|-----------|-------|-------|----------|-----|-----------|-------------|
| MACROD21      | 8.79E-28 | 0.3202562 | 0.336 | 0.231 | 2.12E-23 | 1.4 | MACROD2   | 1.454545455 |
| PSMA41        | 9.64E-28 | 0.2942668 | 0.565 | 0.424 | 2.33E-23 | 1.4 | PSMA4     | 1.33254717  |
| DOK53         | 9.69E-28 | 0.1390098 | 0.061 | 0.022 | 2.34E-23 | 1.4 | DOK5      | 2.772727273 |
| BTF3L41       | 9.72E-28 | 0.1991909 | 0.333 | 0.221 | 2.34E-23 | 1.4 | BTF3L4    | 1.50678733  |
| BCL2A11       | 9.95E-28 | 0.2781831 | 0.142 | 0.075 | 2.40E-23 | 1.4 | BCL2A1    | 1.893333333 |
| AKT33         | 1.00E-27 | 0.2722588 | 0.46  | 0.333 | 2.41E-23 | 1.4 | AKT3      | 1.381381381 |
| LINC008691    | 1.21E-27 | 0.1521024 | 0.085 | 0.037 | 2.92E-23 | 1.4 | LINC00869 | 2.297297297 |
| RP11-66B24.22 | 1.26E-27 | 0.1357011 | 0.063 | 0.023 | 3.03E-23 | 1.4 | RP11-66B2 | 2.739130435 |
| LSM82         | 1.28E-27 | 0.2152082 | 0.299 | 0.196 | 3.09E-23 | 1.4 | LSM8      | 1.525510204 |
| PSMB91        | 1.39E-27 | 0.1129764 | 0.047 | 0.015 | 3.35E-23 | 1.4 | PSMB9     | 3.133333333 |
| ATP5C12       | 1.51E-27 | 0.1875222 | 0.396 | 0.271 | 3.63E-23 | 1.4 | ATP5C1    | 1.461254613 |
| RNF19B1       | 1.79E-27 | 0.232831  | 0.219 | 0.133 | 4.32E-23 | 1.4 | RNF19B    | 1.646616541 |
| NRBF21        | 1.95E-27 | 0.1265489 | 0.1   | 0.046 | 4.71E-23 | 1.4 | NRBF2     | 2.173913043 |
| TPK13         | 1.98E-27 | 0.3231995 | 0.297 | 0.198 | 4.78E-23 | 1.4 | TPK1      | 1.5         |
| ICE2          | 2.37E-27 | 0.141139  | 0.099 | 0.045 | 5.71E-23 | 1.4 | ICE2      | 2.2         |
| LRP62         | 2.62E-27 | 0.1810943 | 0.28  | 0.18  | 6.32E-23 | 1.4 | LRP6      | 1.555555556 |
| LINC009071    | 2.82E-27 | 0.1200902 | 0.05  | 0.016 | 6.80E-23 | 1.4 | LINC00907 | 3.125       |
| ENSA          | 2.86E-27 | 0.2461705 | 0.484 | 0.355 | 6.90E-23 | 1.4 | ENSA      | 1.363380282 |
| DDX243        | 2.87E-27 | 0.2099925 | 0.639 | 0.49  | 6.91E-23 | 1.4 | DDX24     | 1.304081633 |
| FMNL22        | 2.87E-27 | 0.2271514 | 0.469 | 0.338 | 6.93E-23 | 1.4 | FMNL2     | 1.387573964 |
| CALCOCO11     | 4.12E-27 | 0.1492323 | 0.119 | 0.059 | 9.94E-23 | 1.4 | CALCOCO1  | 2.016949153 |
| TMA161        | 4.23E-27 | 0.1388397 | 0.074 | 0.031 | 1.02E-22 | 1.4 | TMA16     | 2.387096774 |
| NOS1AP        | 4.23E-27 | 0.377328  | 0.31  | 0.207 | 1.02E-22 | 1.4 | NOS1AP    | 1.497584541 |
| LARP12        | 4.38E-27 | 0.1914807 | 0.213 | 0.127 | 1.06E-22 | 1.4 | LARP1     | 1.677165354 |
| EIF2AK21      | 4.64E-27 | 0.186758  | 0.152 | 0.083 | 1.12E-22 | 1.4 | EIF2AK2   | 1.831325301 |
| SMC61         | 4.74E-27 | 0.170368  | 0.131 | 0.068 | 1.14E-22 | 1.4 | SMC6      | 1.926470588 |
| RCOR3         | 5.28E-27 | 0.2236721 | 0.159 | 0.088 | 1.27E-22 | 1.4 | RCOR3     | 1.806818182 |
| FAM134B2      | 5.33E-27 | 0.1973224 | 0.158 | 0.087 | 1.28E-22 | 1.4 | FAM134B   | 1.816091954 |
| ACSL43        | 5.47E-27 | 0.1417087 | 0.101 | 0.047 | 1.32E-22 | 1.4 | ACSL4     | 2.14893617  |
| WDR271        | 7.12E-27 | 0.1429471 | 0.073 | 0.03  | 1.72E-22 | 1.4 | WDR27     | 2.433333333 |
| CARD62        | 8.36E-27 | 0.1053505 | 0.069 | 0.027 | 2.02E-22 | 1.4 | CARD6     | 2.555555556 |
| EVL           | 8.63E-27 | 0.1974436 | 0.121 | 0.062 | 2.08E-22 | 1.4 | EVL       | 1.951612903 |
| ANAPC162      | 9.86E-27 | 0.1877963 | 0.349 | 0.235 | 2.38E-22 | 1.4 | ANAPC16   | 1.485106383 |
| RPL293        | 1.02E-26 | 0.630232  | 0.328 | 0.226 | 2.46E-22 | 1.4 | RPL29     | 1.451327434 |
| CD461         | 1.05E-26 | 0.3492674 | 0.51  | 0.39  | 2.53E-22 | 1.4 | CD46      | 1.307692308 |
| SNX82         | 1.11E-26 | 0.1656274 | 0.096 | 0.045 | 2.67E-22 | 1.4 | SNX8      | 2.133333333 |
| SOCS52        | 1.33E-26 | 0.2377986 | 0.206 | 0.124 | 3.21E-22 | 1.4 | SOCS5     | 1.661290323 |
| ZNF1462       | 1.38E-26 | 0.1747929 | 0.164 | 0.092 | 3.33E-22 | 1.4 | ZNF146    | 1.782608696 |
| ANKRD362      | 1.46E-26 | 0.2186333 | 0.149 | 0.081 | 3.52E-22 | 1.4 | ANKRD36   | 1.839506173 |
| CD831         | 1.46E-26 | 0.1901756 | 0.123 | 0.062 | 3.52E-22 | 1.4 | CD83      | 1.983870968 |
| C10orf761     | 1.47E-26 | 0.1689252 | 0.208 | 0.123 | 3.54E-22 | 1.4 | C10orf76  | 1.691056911 |
| IFNGR1        | 1.54E-26 | 0.2669776 | 0.374 | 0.26  | 3.71E-22 | 1.4 | IFNGR1    | 1.438461538 |
| VDR1          | 1.73E-26 | 0.1666821 | 0.141 | 0.075 | 4.17E-22 | 1.4 | VDR       | 1.88        |
| TMEM41A3      | 1.99E-26 | 0.1842757 | 0.215 | 0.13  | 4.80E-22 | 1.4 | TMEM41A   | 1.653846154 |
| CCDC911       | 2.08E-26 | 0.2333071 | 0.463 | 0.334 | 5.01E-22 | 1.4 | CCDC91    | 1.386227545 |
| RNF1301       | 2.11E-26 | 0.1927475 | 0.264 | 0.167 | 5.09E-22 | 1.4 | RNF130    | 1.580838323 |
| ANKRD13C1     | 2.29E-26 | 0.2166148 | 0.181 | 0.105 | 5.53E-22 | 1.4 | ANKRD13C  | 1.723809524 |
| PRKD32        | 2.32E-26 | 0.1764063 | 0.182 | 0.105 | 5.60E-22 | 1.4 | PRKD3     | 1.733333333 |
| DAPK23        | 2.60E-26 | 0.1089335 | 0.337 | 0.221 | 6.27E-22 | 1.4 | DAPK2     | 1.524886878 |
| EIF3J-AS11    | 2.74E-26 | 0.1264735 | 0.095 | 0.044 | 6.61E-22 | 1.4 | EIF3J-AS1 | 2.159090909 |
| GRIP11        | 2.75E-26 | 0.258389  | 0.275 | 0.179 | 6.64E-22 | 1.4 | GRIP1     | 1.536312849 |
| SNX291        | 2.77E-26 | 0.2604747 | 0.16  | 0.09  | 6.69E-22 | 1.4 | SNX29     | 1.777777778 |



|                |          |           |       |       |          |     |           |             |
|----------------|----------|-----------|-------|-------|----------|-----|-----------|-------------|
| KLHDC11        | 2.91E-26 | 0.1334548 | 0.059 | 0.022 | 7.02E-22 | 1.4 | KLHDC1    | 2.681818182 |
| NBR11          | 2.95E-26 | 0.1799898 | 0.259 | 0.163 | 7.11E-22 | 1.4 | NBR1      | 1.588957055 |
| TUSC32         | 3.46E-26 | 0.193835  | 0.173 | 0.098 | 8.34E-22 | 1.4 | TUSC3     | 1.765306122 |
| SPATS2L1       | 3.82E-26 | 0.2746524 | 0.33  | 0.227 | 9.22E-22 | 1.4 | SPATS2L   | 1.453744493 |
| RP11-286N22.81 | 3.91E-26 | 0.1409876 | 0.082 | 0.036 | 9.42E-22 | 1.4 | RP11-286N | 2.277777778 |
| MTR1           | 4.08E-26 | 0.1768238 | 0.113 | 0.056 | 9.85E-22 | 1.4 | MTR       | 2.017857143 |
| KB-1562D12.11  | 4.12E-26 | 0.1400175 | 0.071 | 0.029 | 9.94E-22 | 1.4 | KB-1562D1 | 2.448275862 |
| STAT1          | 5.04E-26 | 0.1421872 | 0.135 | 0.071 | 1.22E-21 | 1.4 | STAT1     | 1.901408451 |
| NHLRC21        | 5.10E-26 | 0.1618072 | 0.108 | 0.053 | 1.23E-21 | 1.4 | NHLRC2    | 2.037735849 |
| PLB11          | 5.16E-26 | 0.1000397 | 0.066 | 0.026 | 1.24E-21 | 1.4 | PLB1      | 2.538461538 |
| AC159540.12    | 5.35E-26 | 0.2577404 | 0.169 | 0.097 | 1.29E-21 | 1.4 | AC159540. | 1.742268041 |
| SACS2          | 5.36E-26 | 0.1725371 | 0.107 | 0.053 | 1.29E-21 | 1.4 | SACS      | 2.018867925 |
| KCNC42         | 5.53E-26 | 0.1396756 | 0.05  | 0.017 | 1.33E-21 | 1.4 | KCNC4     | 2.941176471 |
| SMPDL3A        | 5.59E-26 | 0.1044696 | 0.051 | 0.018 | 1.35E-21 | 1.4 | SMPDL3A   | 2.833333333 |
| GCDH3          | 5.80E-26 | 0.1452875 | 0.124 | 0.064 | 1.40E-21 | 1.4 | GCDH      | 1.9375      |
| RNF2172        | 5.87E-26 | 0.1570382 | 0.121 | 0.062 | 1.42E-21 | 1.4 | RNF217    | 1.951612903 |
| TAF4B1         | 6.11E-26 | 0.1558514 | 0.099 | 0.047 | 1.47E-21 | 1.4 | TAF4B     | 2.106382979 |
| CCNB1IP13      | 7.29E-26 | 0.1665528 | 0.355 | 0.241 | 1.76E-21 | 1.4 | CCNB1IP1  | 1.473029046 |
| PSMB12         | 7.33E-26 | 0.1953215 | 0.514 | 0.377 | 1.77E-21 | 1.4 | PSMB1     | 1.363395225 |
| ST133          | 7.72E-26 | 0.2051227 | 0.392 | 0.273 | 1.86E-21 | 1.4 | ST13      | 1.435897436 |
| CYB5R22        | 8.28E-26 | 0.1160688 | 0.073 | 0.03  | 2.00E-21 | 1.4 | CYB5R2    | 2.433333333 |
| GGA11          | 8.52E-26 | 0.1546609 | 0.077 | 0.033 | 2.06E-21 | 1.4 | GGA1      | 2.333333333 |
| SRSF33         | 8.80E-26 | 0.1711275 | 0.555 | 0.417 | 2.12E-21 | 1.4 | SRSF3     | 1.330935252 |
| ZNF529-AS12    | 1.03E-25 | 0.1372328 | 0.08  | 0.035 | 2.48E-21 | 1.4 | ZNF529-AS | 2.285714286 |
| RPL27A1        | 1.05E-25 | 0.3355484 | 0.531 | 0.411 | 2.53E-21 | 1.4 | RPL27A    | 1.291970803 |
| ATG71          | 1.05E-25 | 0.211858  | 0.303 | 0.202 | 2.54E-21 | 1.4 | ATG7      | 1.5         |
| NUDT51         | 1.09E-25 | 0.1726899 | 0.212 | 0.129 | 2.62E-21 | 1.4 | NUDT5     | 1.643410853 |
| BRE            | 1.18E-25 | 0.2588934 | 0.297 | 0.199 | 2.84E-21 | 1.4 | BRE       | 1.492462312 |
| PXK1           | 1.21E-25 | 0.127596  | 0.098 | 0.046 | 2.92E-21 | 1.4 | PXK       | 2.130434783 |
| PTPN41         | 1.22E-25 | 0.1816317 | 0.146 | 0.08  | 2.94E-21 | 1.4 | PTPN4     | 1.825       |
| ATP6AP1L       | 1.38E-25 | 0.1157066 | 0.063 | 0.024 | 3.32E-21 | 1.4 | ATP6AP1L  | 2.625       |
| TMPRSS32       | 1.49E-25 | 0.1497268 | 0.09  | 0.041 | 3.60E-21 | 1.4 | TMPRSS3   | 2.195121951 |
| DNAJC72        | 1.50E-25 | 0.1944597 | 0.263 | 0.169 | 3.61E-21 | 1.4 | DNAJC7    | 1.556213018 |
| PSMC22         | 1.56E-25 | 0.1915867 | 0.31  | 0.208 | 3.76E-21 | 1.4 | PSMC2     | 1.490384615 |
| TTC9C1         | 1.57E-25 | 0.1748313 | 0.189 | 0.112 | 3.77E-21 | 1.4 | TTC9C     | 1.6875      |
| NSF1           | 1.61E-25 | 0.2208207 | 0.228 | 0.142 | 3.88E-21 | 1.4 | NSF       | 1.605633803 |
| RIPK22         | 1.62E-25 | 0.1954398 | 0.382 | 0.267 | 3.92E-21 | 1.4 | RIPK2     | 1.43071161  |
| ARHGAP241      | 1.76E-25 | 0.1717114 | 0.07  | 0.029 | 4.23E-21 | 1.4 | ARHGAP24  | 2.413793103 |
| AIMP13         | 1.81E-25 | 0.1941819 | 0.407 | 0.289 | 4.37E-21 | 1.4 | AIMP1     | 1.408304498 |
| RPS19BP1       | 1.83E-25 | 0.1397081 | 0.051 | 0.018 | 4.41E-21 | 1.4 | RPS19BP1  | 2.833333333 |
| ERRFI12        | 2.04E-25 | 0.2159783 | 0.661 | 0.526 | 4.91E-21 | 1.4 | ERRFI1    | 1.256653992 |
| RPS113         | 2.33E-25 | 0.3601178 | 0.786 | 0.769 | 5.62E-21 | 1.4 | RPS11     | 1.022106632 |
| THUMPD11       | 2.57E-25 | 0.1647223 | 0.135 | 0.072 | 6.20E-21 | 1.4 | THUMPD1   | 1.875       |
| C9orf31        | 2.77E-25 | 0.3084333 | 0.208 | 0.13  | 6.69E-21 | 1.4 | C9orf3    | 1.6         |
| SLC9A81        | 2.79E-25 | 0.1732355 | 0.147 | 0.081 | 6.73E-21 | 1.4 | SLC9A8    | 1.814814815 |
| PDLIM52        | 2.85E-25 | 0.1309327 | 0.85  | 0.729 | 6.87E-21 | 1.4 | PDLIM5    | 1.165980796 |
| RAD501         | 2.87E-25 | 0.1760134 | 0.145 | 0.079 | 6.92E-21 | 1.4 | RAD50     | 1.835443038 |
| MBD5           | 2.88E-25 | 0.2282427 | 0.414 | 0.294 | 6.95E-21 | 1.4 | MBD5      | 1.408163265 |
| DLEU2          | 2.89E-25 | 0.1792124 | 0.315 | 0.211 | 6.98E-21 | 1.4 | DLEU2     | 1.492890995 |
| TTC141         | 3.17E-25 | 0.1855447 | 0.126 | 0.066 | 7.64E-21 | 1.4 | TTC14     | 1.909090909 |
| N4BP2L1        | 3.35E-25 | 0.1945229 | 0.176 | 0.102 | 8.08E-21 | 1.4 | N4BP2L1   | 1.725490196 |
| SLC25A332      | 3.36E-25 | 0.2262101 | 0.155 | 0.088 | 8.11E-21 | 1.4 | SLC25A33  | 1.761363636 |

|                |          |           |       |       |          |     |            |             |
|----------------|----------|-----------|-------|-------|----------|-----|------------|-------------|
| SLC6A16        | 3.37E-25 | 0.1471948 | 0.091 | 0.042 | 8.13E-21 | 1.4 | SLC6A16    | 2.166666667 |
| RPL393         | 3.86E-25 | 0.2958624 | 0.933 | 0.894 | 9.31E-21 | 1.4 | RPL39      | 1.043624161 |
| ZNF7911        | 4.21E-25 | 0.1709832 | 0.159 | 0.09  | 1.01E-20 | 1.4 | ZNF791     | 1.766666667 |
| SEC24D2        | 4.47E-25 | 0.1210057 | 0.285 | 0.184 | 1.08E-20 | 1.4 | SEC24D     | 1.548913043 |
| CRLF32         | 4.59E-25 | 0.1904282 | 0.167 | 0.096 | 1.11E-20 | 1.4 | CRLF3      | 1.739583333 |
| KIF9-AS11      | 4.76E-25 | 0.1620776 | 0.085 | 0.038 | 1.15E-20 | 1.4 | KIF9-AS1   | 2.236842105 |
| RBMX21         | 5.22E-25 | 0.1439199 | 0.154 | 0.086 | 1.26E-20 | 1.4 | RBMX2      | 1.790697674 |
| RPL93          | 5.45E-25 | 0.2362591 | 0.681 | 0.556 | 1.31E-20 | 1.4 | RPL9       | 1.224820144 |
| ZC3H6          | 5.86E-25 | 0.1690881 | 0.129 | 0.069 | 1.41E-20 | 1.4 | ZC3H6      | 1.869565217 |
| KCTD72         | 6.35E-25 | 0.2002532 | 0.176 | 0.103 | 1.53E-20 | 1.4 | KCTD7      | 1.708737864 |
| PIK3IP1-AS11   | 6.98E-25 | 0.1496126 | 0.081 | 0.036 | 1.68E-20 | 1.4 | PIK3IP1-AS | 2.25        |
| FAM49B2        | 7.25E-25 | 0.2204017 | 0.29  | 0.193 | 1.75E-20 | 1.4 | FAM49B     | 1.502590674 |
| SECISBP2L1     | 7.75E-25 | 0.1972467 | 0.308 | 0.205 | 1.87E-20 | 1.4 | SECISBP2L  | 1.502439024 |
| SLC2A91        | 8.30E-25 | 0.1179089 | 0.071 | 0.029 | 2.00E-20 | 1.4 | SLC2A9     | 2.448275862 |
| CTA-293F17.13  | 8.40E-25 | 0.1241476 | 0.125 | 0.065 | 2.03E-20 | 1.4 | CTA-293F1  | 1.923076923 |
| FOXP1          | 8.68E-25 | 0.1295106 | 0.786 | 0.616 | 2.09E-20 | 1.4 | FOXP1      | 1.275974026 |
| CCNC2          | 8.82E-25 | 0.220348  | 0.305 | 0.206 | 2.13E-20 | 1.4 | CCNC       | 1.480582524 |
| ZNF1312        | 9.60E-25 | 0.1987323 | 0.193 | 0.117 | 2.31E-20 | 1.4 | ZNF131     | 1.64957265  |
| FAM189A22      | 1.16E-24 | 0.1691479 | 0.12  | 0.062 | 2.80E-20 | 1.4 | FAM189A2   | 1.935483871 |
| ANKRA2         | 1.16E-24 | 0.1396035 | 0.122 | 0.063 | 2.81E-20 | 1.4 | ANKRA2     | 1.936507937 |
| TLK11          | 1.18E-24 | 0.2279444 | 0.28  | 0.185 | 2.84E-20 | 1.4 | TLK1       | 1.513513514 |
| EXOC41         | 1.19E-24 | 0.2443226 | 0.448 | 0.325 | 2.86E-20 | 1.4 | EXOC4      | 1.378461538 |
| SRGAP31        | 1.24E-24 | 0.2015386 | 0.096 | 0.046 | 2.99E-20 | 1.4 | SRGAP3     | 2.086956522 |
| ZCCHC6         | 1.43E-24 | 0.2403121 | 0.447 | 0.327 | 3.44E-20 | 1.4 | ZCCHC6     | 1.366972477 |
| USP401         | 1.71E-24 | 0.1810924 | 0.129 | 0.069 | 4.13E-20 | 1.4 | USP40      | 1.869565217 |
| RAB241         | 1.76E-24 | 0.1273007 | 0.058 | 0.022 | 4.24E-20 | 1.4 | RAB24      | 2.636363636 |
| STYXL11        | 1.99E-24 | 0.1287886 | 0.092 | 0.043 | 4.80E-20 | 1.4 | STYXL1     | 2.139534884 |
| IL27RA2        | 1.99E-24 | 0.113043  | 0.055 | 0.02  | 4.81E-20 | 1.4 | IL27RA     | 2.75        |
| KRR13          | 2.22E-24 | 0.2120288 | 0.227 | 0.144 | 5.35E-20 | 1.4 | KRR1       | 1.576388889 |
| NSUN41         | 2.23E-24 | 0.1421721 | 0.116 | 0.06  | 5.39E-20 | 1.4 | NSUN4      | 1.933333333 |
| PSMF11         | 2.24E-24 | 0.1652406 | 0.134 | 0.072 | 5.41E-20 | 1.4 | PSMF1      | 1.861111111 |
| SLC26A81       | 2.27E-24 | 0.1186723 | 0.052 | 0.019 | 5.48E-20 | 1.4 | SLC26A8    | 2.736842105 |
| PACRGL         | 2.34E-24 | 0.1141452 | 0.074 | 0.032 | 5.64E-20 | 1.4 | PACRGL     | 2.3125      |
| NSMAF1         | 2.37E-24 | 0.1671417 | 0.127 | 0.067 | 5.71E-20 | 1.4 | NSMAF      | 1.895522388 |
| RP11-631N16.22 | 2.40E-24 | 0.1567596 | 0.084 | 0.038 | 5.80E-20 | 1.4 | RP11-631N  | 2.210526316 |
| RP11-513G19.11 | 2.50E-24 | 0.1110758 | 0.038 | 0.011 | 6.02E-20 | 1.4 | RP11-513G  | 3.454545455 |
| FAM217B1       | 2.59E-24 | 0.1001106 | 0.071 | 0.03  | 6.24E-20 | 1.4 | FAM217B    | 2.366666667 |
| CHDH1          | 2.73E-24 | 0.1655419 | 0.096 | 0.046 | 6.59E-20 | 1.4 | CHDH       | 2.086956522 |
| FBXW111        | 3.07E-24 | 0.1950871 | 0.396 | 0.28  | 7.40E-20 | 1.4 | FBXW11     | 1.414285714 |
| PGBD52         | 3.26E-24 | 0.1295703 | 0.079 | 0.035 | 7.87E-20 | 1.4 | PGBD5      | 2.257142857 |
| ARMT11         | 3.27E-24 | 0.1671585 | 0.14  | 0.076 | 7.88E-20 | 1.4 | ARMT1      | 1.842105263 |
| ZNF2351        | 3.60E-24 | 0.1725663 | 0.129 | 0.069 | 8.67E-20 | 1.4 | ZNF235     | 1.869565217 |
| SPDYE12        | 4.38E-24 | 0.1132739 | 0.07  | 0.03  | 1.06E-19 | 1.4 | SPDYE1     | 2.333333333 |
| PPA21          | 4.96E-24 | 0.2171987 | 0.28  | 0.185 | 1.20E-19 | 1.4 | PPA2       | 1.513513514 |
| RPS162         | 5.27E-24 | 0.4188612 | 0.407 | 0.298 | 1.27E-19 | 1.4 | RPS16      | 1.365771812 |
| SUB13          | 5.50E-24 | 0.131216  | 0.75  | 0.624 | 1.33E-19 | 1.4 | SUB1       | 1.201923077 |
| TBC1D141       | 5.72E-24 | 0.1827606 | 0.124 | 0.065 | 1.38E-19 | 1.4 | TBC1D14    | 1.907692308 |
| LHPP1          | 5.97E-24 | 0.1039585 | 0.046 | 0.016 | 1.44E-19 | 1.4 | LHPP       | 2.875       |
| LINC014812     | 6.36E-24 | 0.1632736 | 0.079 | 0.035 | 1.53E-19 | 1.4 | LINC01481  | 2.257142857 |
| NFE2L21        | 7.23E-24 | 0.2592658 | 0.486 | 0.369 | 1.74E-19 | 1.4 | NFE2L2     | 1.317073171 |
| SENP51         | 8.29E-24 | 0.1993684 | 0.282 | 0.187 | 2.00E-19 | 1.4 | SENP5      | 1.50802139  |
| WDSUB11        | 8.91E-24 | 0.1472027 | 0.101 | 0.05  | 2.15E-19 | 1.4 | WDSUB1     | 2.02        |

|                |          |           |       |       |          |     |             |             |
|----------------|----------|-----------|-------|-------|----------|-----|-------------|-------------|
| PLOD12         | 9.95E-24 | 0.1230032 | 0.086 | 0.04  | 2.40E-19 | 1.4 | PLOD1       | 2.15        |
| HLCS1          | 1.08E-23 | 0.177438  | 0.137 | 0.075 | 2.61E-19 | 1.4 | HLCS        | 1.826666667 |
| ZNF6771        | 1.11E-23 | 0.1233161 | 0.083 | 0.038 | 2.68E-19 | 1.4 | ZNF677      | 2.184210526 |
| RP11-712B9.21  | 1.25E-23 | 0.1287161 | 0.066 | 0.027 | 3.01E-19 | 1.4 | RP11-712B   | 2.444444444 |
| TRPC12         | 1.40E-23 | 0.1139754 | 0.063 | 0.026 | 3.39E-19 | 1.4 | TRPC1       | 2.423076923 |
| LINC015492     | 1.46E-23 | 0.2595731 | 0.043 | 0.014 | 3.52E-19 | 1.4 | LINC01549   | 3.071428571 |
| MRPL91         | 1.47E-23 | 0.1023491 | 0.055 | 0.021 | 3.54E-19 | 1.4 | MRPL9       | 2.619047619 |
| MRPS18B2       | 1.56E-23 | 0.1495288 | 0.184 | 0.109 | 3.76E-19 | 1.4 | MRPS18B     | 1.688073394 |
| ZC3H82         | 1.68E-23 | 0.1236123 | 0.123 | 0.065 | 4.06E-19 | 1.4 | ZC3H8       | 1.892307692 |
| RABGAP1L1      | 1.87E-23 | 0.1888454 | 0.319 | 0.218 | 4.50E-19 | 1.4 | RABGAP1L    | 1.463302752 |
| TRIM131        | 1.88E-23 | 0.133606  | 0.136 | 0.075 | 4.54E-19 | 1.4 | TRIM13      | 1.813333333 |
| MITD11         | 1.98E-23 | 0.1499919 | 0.163 | 0.095 | 4.78E-19 | 1.4 | MITD1       | 1.715789474 |
| ZNF2541        | 2.29E-23 | 0.193843  | 0.238 | 0.153 | 5.52E-19 | 1.4 | ZNF254      | 1.555555556 |
| ECHDC21        | 2.55E-23 | 0.1801077 | 0.189 | 0.114 | 6.14E-19 | 1.4 | ECHDC2      | 1.657894737 |
| SPPL3          | 2.64E-23 | 0.2017494 | 0.361 | 0.254 | 6.36E-19 | 1.4 | SPPL3       | 1.421259843 |
| ANKRD26        | 2.68E-23 | 0.159718  | 0.131 | 0.071 | 6.47E-19 | 1.4 | ANKRD26     | 1.845070423 |
| XPNPEP31       | 2.88E-23 | 0.1340182 | 0.1   | 0.05  | 6.94E-19 | 1.4 | XPNPEP3     | 2           |
| CPD            | 3.11E-23 | 0.2862775 | 0.326 | 0.231 | 7.50E-19 | 1.4 | CPD         | 1.411255411 |
| CASC41         | 3.30E-23 | 0.2234896 | 0.269 | 0.179 | 7.96E-19 | 1.4 | CASC4       | 1.502793296 |
| BET11          | 3.37E-23 | 0.1814946 | 0.196 | 0.12  | 8.12E-19 | 1.4 | BET1        | 1.633333333 |
| KIZ1           | 3.40E-23 | 0.115134  | 0.059 | 0.023 | 8.21E-19 | 1.4 | KIZ         | 2.565217391 |
| CMC11          | 3.42E-23 | 0.1474957 | 0.089 | 0.042 | 8.25E-19 | 1.4 | CMC1        | 2.119047619 |
| MFN12          | 4.45E-23 | 0.1751481 | 0.192 | 0.117 | 1.07E-18 | 1.4 | MFN1        | 1.641025641 |
| ZNF3021        | 4.47E-23 | 0.1001962 | 0.062 | 0.025 | 1.08E-18 | 1.4 | ZNF302      | 2.48        |
| PRR5L1         | 4.67E-23 | 0.1208866 | 0.053 | 0.02  | 1.13E-18 | 1.4 | PRR5L       | 2.65        |
| MRRF2          | 4.69E-23 | 0.1812395 | 0.203 | 0.125 | 1.13E-18 | 1.4 | MRRF        | 1.624       |
| MON2           | 5.24E-23 | 0.1786175 | 0.324 | 0.223 | 1.26E-18 | 1.4 | MON2        | 1.452914798 |
| PRICKLE13      | 5.60E-23 | 0.1824565 | 0.097 | 0.048 | 1.35E-18 | 1.4 | PRICKLE1    | 2.020833333 |
| TBC1D32        | 6.24E-23 | 0.2167278 | 0.102 | 0.052 | 1.50E-18 | 1.4 | TBC1D32     | 1.961538462 |
| ATP11A2        | 7.20E-23 | 0.1498068 | 0.104 | 0.053 | 1.74E-18 | 1.4 | ATP11A      | 1.962264151 |
| PPID1          | 7.75E-23 | 0.131042  | 0.113 | 0.058 | 1.87E-18 | 1.4 | PPID        | 1.948275862 |
| SUSD4          | 8.07E-23 | 0.1169503 | 0.071 | 0.031 | 1.95E-18 | 1.4 | SUSD4       | 2.290322581 |
| RP11-541G9.11  | 8.17E-23 | 0.1030786 | 0.039 | 0.012 | 1.97E-18 | 1.4 | RP11-541G   | 3.25        |
| TCP13          | 8.38E-23 | 0.1366513 | 0.247 | 0.159 | 2.02E-18 | 1.4 | TCP1        | 1.553459119 |
| RP11-545I5.31  | 8.49E-23 | 0.1000306 | 0.044 | 0.015 | 2.05E-18 | 1.4 | RP11-545I5  | 2.933333333 |
| NUP371         | 9.03E-23 | 0.1167831 | 0.084 | 0.039 | 2.18E-18 | 1.4 | NUP37       | 2.153846154 |
| RPL373         | 9.58E-23 | 0.2138182 | 0.963 | 0.943 | 2.31E-18 | 1.4 | RPL37       | 1.021208908 |
| NEURL32        | 9.68E-23 | 0.1195895 | 0.064 | 0.027 | 2.33E-18 | 1.4 | NEURL3      | 2.37037037  |
| DPH61          | 1.02E-22 | 0.1888349 | 0.115 | 0.061 | 2.46E-18 | 1.4 | DPH6        | 1.885245902 |
| C6orf2031      | 1.02E-22 | 0.1082248 | 0.061 | 0.025 | 2.47E-18 | 1.4 | C6orf203    | 2.44        |
| KDM2B1         | 1.11E-22 | 0.1432739 | 0.076 | 0.034 | 2.68E-18 | 1.4 | KDM2B       | 2.235294118 |
| TRAF32         | 1.12E-22 | 0.230904  | 0.186 | 0.115 | 2.70E-18 | 1.4 | TRAF3       | 1.617391304 |
| NUBPL1         | 1.22E-22 | 0.1661982 | 0.099 | 0.05  | 2.94E-18 | 1.4 | NUBPL       | 1.98        |
| AMY2B          | 1.24E-22 | 0.1131289 | 0.078 | 0.035 | 2.98E-18 | 1.4 | AMY2B       | 2.228571429 |
| INTS10         | 1.25E-22 | 0.1671437 | 0.201 | 0.124 | 3.01E-18 | 1.4 | INTS10      | 1.620967742 |
| AKAP11         | 1.26E-22 | 0.1286365 | 0.059 | 0.024 | 3.03E-18 | 1.4 | AKAP1       | 2.458333333 |
| C7orf601       | 1.31E-22 | 0.1524769 | 0.124 | 0.067 | 3.15E-18 | 1.4 | C7orf60     | 1.850746269 |
| ZNF4381        | 1.32E-22 | 0.1658734 | 0.122 | 0.066 | 3.19E-18 | 1.4 | ZNF438      | 1.848484848 |
| RP11-541P9.32  | 1.54E-22 | 0.1465156 | 0.093 | 0.045 | 3.72E-18 | 1.4 | RP11-541P9  | 2.066666667 |
| RP11-440L14.12 | 1.96E-22 | 0.127111  | 0.074 | 0.033 | 4.72E-18 | 1.4 | RP11-440L14 | 2.242424242 |
| KAT2B1         | 1.97E-22 | 0.120307  | 0.063 | 0.026 | 4.76E-18 | 1.4 | KAT2B       | 2.423076923 |
| TAPT1-AS11     | 2.93E-22 | 0.1651027 | 0.109 | 0.057 | 7.06E-18 | 1.4 | TAPT1-AS1   | 1.912280702 |

|            |          |           |       |       |          |     |           |             |
|------------|----------|-----------|-------|-------|----------|-----|-----------|-------------|
| MAGI12     | 3.32E-22 | 0.1801981 | 0.857 | 0.74  | 8.02E-18 | 1.4 | MAGI1     | 1.158108108 |
| SCAI1      | 4.53E-22 | 0.1827215 | 0.111 | 0.059 | 1.09E-17 | 1.4 | SCAI      | 1.881355932 |
| FCHSD2     | 4.57E-22 | 0.1601608 | 0.199 | 0.123 | 1.10E-17 | 1.4 | FCHSD2    | 1.617886179 |
| TATDN13    | 4.59E-22 | 0.1393438 | 0.301 | 0.202 | 1.11E-17 | 1.4 | TATDN1    | 1.49009901  |
| IDE1       | 4.69E-22 | 0.1497784 | 0.12  | 0.064 | 1.13E-17 | 1.4 | IDE       | 1.875       |
| SIL11      | 4.74E-22 | 0.2044514 | 0.147 | 0.085 | 1.14E-17 | 1.4 | SIL1      | 1.729411765 |
| MRPS311    | 5.76E-22 | 0.1515567 | 0.157 | 0.092 | 1.39E-17 | 1.4 | MRPS31    | 1.706521739 |
| FRK2       | 6.44E-22 | 0.1878563 | 0.207 | 0.131 | 1.55E-17 | 1.4 | FRK       | 1.580152672 |
| CLIC43     | 7.01E-22 | 0.2186878 | 0.668 | 0.548 | 1.69E-17 | 1.4 | CLIC4     | 1.218978102 |
| ELMOD31    | 7.08E-22 | 0.1301353 | 0.144 | 0.081 | 1.71E-17 | 1.4 | ELMOD3    | 1.777777778 |
| BBIP11     | 7.53E-22 | 0.1531406 | 0.164 | 0.097 | 1.82E-17 | 1.4 | BBIP1     | 1.690721649 |
| DDIT43     | 8.03E-22 | 0.1716877 | 0.234 | 0.151 | 1.94E-17 | 1.4 | DDIT4     | 1.549668874 |
| PARG1      | 8.48E-22 | 0.1616902 | 0.14  | 0.08  | 2.04E-17 | 1.4 | PARG      | 1.75        |
| ICK1       | 8.59E-22 | 0.1133707 | 0.078 | 0.036 | 2.07E-17 | 1.4 | ICK       | 2.166666667 |
| TMEM1171   | 9.03E-22 | 0.1408768 | 0.07  | 0.031 | 2.18E-17 | 1.4 | TMEM117   | 2.258064516 |
| MDM41      | 9.08E-22 | 0.2291676 | 0.336 | 0.239 | 2.19E-17 | 1.4 | MDM4      | 1.405857741 |
| FOCAD1     | 9.22E-22 | 0.1785029 | 0.239 | 0.155 | 2.22E-17 | 1.4 | FOCAD     | 1.541935484 |
| CCDC823    | 9.32E-22 | 0.1555528 | 0.229 | 0.148 | 2.25E-17 | 1.4 | CCDC82    | 1.547297297 |
| IQCK       | 9.79E-22 | 0.1679419 | 0.101 | 0.052 | 2.36E-17 | 1.4 | IQCK      | 1.942307692 |
| COMMD101   | 1.03E-21 | 0.2025522 | 0.283 | 0.193 | 2.48E-17 | 1.4 | COMMD10   | 1.466321244 |
| TTC92      | 1.21E-21 | 0.1990839 | 0.242 | 0.159 | 2.92E-17 | 1.4 | TTC9      | 1.522012579 |
| APTR2      | 1.32E-21 | 0.1257155 | 0.105 | 0.054 | 3.18E-17 | 1.4 | APTR      | 1.944444444 |
| C1orf1861  | 1.45E-21 | 0.1026121 | 0.046 | 0.017 | 3.50E-17 | 1.4 | C1orf186  | 2.705882353 |
| JAK2       | 1.68E-21 | 0.3509327 | 0.159 | 0.097 | 4.05E-17 | 1.4 | JAK2      | 1.639175258 |
| PPIA3      | 1.85E-21 | 0.1405083 | 0.879 | 0.795 | 4.46E-17 | 1.4 | PPIA      | 1.105660377 |
| APOL1      | 1.92E-21 | 0.1162594 | 0.069 | 0.03  | 4.62E-17 | 1.4 | APOL1     | 2.3         |
| PID13      | 1.94E-21 | 0.2019652 | 0.127 | 0.07  | 4.67E-17 | 1.4 | PID1      | 1.814285714 |
| GNPTAB1    | 2.16E-21 | 0.176166  | 0.151 | 0.088 | 5.20E-17 | 1.4 | GNPTAB    | 1.715909091 |
| TCTN3      | 2.30E-21 | 0.1183847 | 0.072 | 0.032 | 5.54E-17 | 1.4 | TCTN3     | 2.25        |
| RAB27A1    | 2.55E-21 | 0.1442336 | 0.12  | 0.065 | 6.14E-17 | 1.4 | RAB27A    | 1.846153846 |
| CSTF31     | 2.71E-21 | 0.1705325 | 0.175 | 0.107 | 6.53E-17 | 1.4 | CSTF3     | 1.635514019 |
| LARS21     | 2.76E-21 | 0.1381187 | 0.074 | 0.034 | 6.65E-17 | 1.4 | LARS2     | 2.176470588 |
| USP162     | 2.98E-21 | 0.1345539 | 0.228 | 0.146 | 7.20E-17 | 1.4 | USP16     | 1.561643836 |
| ZNFX1      | 3.36E-21 | 0.2003209 | 0.194 | 0.122 | 8.09E-17 | 1.4 | ZNFX1     | 1.590163934 |
| CAPRIN11   | 3.44E-21 | 0.1628592 | 0.286 | 0.194 | 8.29E-17 | 1.4 | CAPRIN1   | 1.474226804 |
| DHTKD1     | 3.50E-21 | 0.1027446 | 0.065 | 0.028 | 8.45E-17 | 1.4 | DHTKD1    | 2.321428571 |
| DDX502     | 3.53E-21 | 0.1498355 | 0.138 | 0.078 | 8.51E-17 | 1.4 | DDX50     | 1.769230769 |
| DDX53      | 3.65E-21 | 0.240978  | 0.617 | 0.484 | 8.80E-17 | 1.4 | DDX5      | 1.274793388 |
| CEP951     | 3.66E-21 | 0.173525  | 0.202 | 0.127 | 8.83E-17 | 1.4 | CEP95     | 1.590551181 |
| SOAT12     | 3.97E-21 | 0.1229388 | 0.073 | 0.033 | 9.58E-17 | 1.4 | SOAT1     | 2.212121212 |
| NCK21      | 3.97E-21 | 0.2225131 | 0.204 | 0.131 | 9.58E-17 | 1.4 | NCK2      | 1.557251908 |
| ZFH31      | 4.25E-21 | 0.1898234 | 0.181 | 0.112 | 1.03E-16 | 1.4 | ZFH3      | 1.616071429 |
| ZNHIT31    | 4.63E-21 | 0.1471236 | 0.26  | 0.173 | 1.12E-16 | 1.4 | ZNHIT3    | 1.502890173 |
| SMURF23    | 5.31E-21 | 0.1974615 | 0.386 | 0.28  | 1.28E-16 | 1.4 | SMURF2    | 1.378571429 |
| LINC008873 | 5.32E-21 | 0.1044695 | 0.07  | 0.031 | 1.28E-16 | 1.4 | LINC00887 | 2.258064516 |
| CTPS2      | 5.56E-21 | 0.1532169 | 0.12  | 0.065 | 1.34E-16 | 1.4 | CTPS2     | 1.846153846 |
| CMIP3      | 5.65E-21 | 0.1734893 | 0.36  | 0.255 | 1.36E-16 | 1.4 | CMIP      | 1.411764706 |
| NASP1      | 5.84E-21 | 0.1739118 | 0.23  | 0.15  | 1.41E-16 | 1.4 | NASP      | 1.533333333 |
| DNAJC111   | 6.33E-21 | 0.123234  | 0.078 | 0.036 | 1.53E-16 | 1.4 | DNAJC11   | 2.166666667 |
| ATG10      | 6.51E-21 | 0.2398219 | 0.211 | 0.136 | 1.57E-16 | 1.4 | ATG10     | 1.551470588 |
| C11orf581  | 7.30E-21 | 0.1769423 | 0.372 | 0.266 | 1.76E-16 | 1.4 | C11orf58  | 1.398496241 |
| MRPS51     | 7.32E-21 | 0.1076506 | 0.085 | 0.041 | 1.76E-16 | 1.4 | MRPS5     | 2.073170732 |

|                |          |           |       |       |          |     |           |             |
|----------------|----------|-----------|-------|-------|----------|-----|-----------|-------------|
| FDFT11         | 7.59E-21 | 0.2301158 | 0.408 | 0.303 | 1.83E-16 | 1.4 | FDFT1     | 1.346534653 |
| CCDC571        | 7.92E-21 | 0.1619253 | 0.099 | 0.051 | 1.91E-16 | 1.4 | CCDC57    | 1.941176471 |
| SRGN           | 9.31E-21 | 0.1401799 | 0.057 | 0.024 | 2.24E-16 | 1.4 | SRGN      | 2.375       |
| NONO3          | 9.58E-21 | 0.1545974 | 0.416 | 0.302 | 2.31E-16 | 1.4 | NONO      | 1.377483444 |
| DPF21          | 1.03E-20 | 0.1472284 | 0.135 | 0.077 | 2.49E-16 | 1.4 | DPF2      | 1.753246753 |
| PSMB73         | 1.08E-20 | 0.1363493 | 0.571 | 0.438 | 2.62E-16 | 1.4 | PSMB7     | 1.303652968 |
| VGLL42         | 1.18E-20 | 0.1908271 | 0.307 | 0.213 | 2.85E-16 | 1.4 | VGLL4     | 1.441314554 |
| MPP62          | 1.30E-20 | 0.140762  | 0.088 | 0.043 | 3.12E-16 | 1.4 | MPP6      | 2.046511628 |
| C7orf731       | 1.42E-20 | 0.1583426 | 0.165 | 0.1   | 3.43E-16 | 1.4 | C7orf73   | 1.65        |
| PC1            | 1.48E-20 | 0.1026588 | 0.051 | 0.02  | 3.57E-16 | 1.4 | PC        | 2.55        |
| SRSF52         | 1.58E-20 | 0.174049  | 0.403 | 0.293 | 3.80E-16 | 1.4 | SRSF5     | 1.375426621 |
| RP11-745L13.22 | 1.59E-20 | 0.129186  | 0.09  | 0.045 | 3.83E-16 | 1.4 | RP11-745L | 2           |
| C9orf851       | 1.60E-20 | 0.1509883 | 0.113 | 0.061 | 3.85E-16 | 1.4 | C9orf85   | 1.852459016 |
| RPL361         | 1.91E-20 | 0.4567692 | 0.274 | 0.191 | 4.62E-16 | 1.4 | RPL36     | 1.434554974 |
| PRDX62         | 2.06E-20 | 0.1289108 | 0.25  | 0.165 | 4.97E-16 | 1.4 | PRDX6     | 1.515151515 |
| UBAP22         | 2.29E-20 | 0.1804439 | 0.224 | 0.148 | 5.51E-16 | 1.4 | UBAP2     | 1.513513514 |
| TMLHE1         | 2.60E-20 | 0.1179442 | 0.088 | 0.044 | 6.28E-16 | 1.4 | TMLHE     | 2           |
| DMKN1          | 2.75E-20 | 0.132642  | 0.132 | 0.075 | 6.64E-16 | 1.4 | DMKN      | 1.76        |
| RBM221         | 2.78E-20 | 0.1372505 | 0.126 | 0.071 | 6.70E-16 | 1.4 | RBM22     | 1.774647887 |
| ACAT23         | 2.92E-20 | 0.1732481 | 0.28  | 0.192 | 7.04E-16 | 1.4 | ACAT2     | 1.458333333 |
| CNIH11         | 2.98E-20 | 0.1519546 | 0.333 | 0.234 | 7.19E-16 | 1.4 | CNIH1     | 1.423076923 |
| XKR61          | 3.20E-20 | 0.2150045 | 0.226 | 0.149 | 7.70E-16 | 1.4 | XKR6      | 1.516778523 |
| ACTR3C1        | 3.26E-20 | 0.1633757 | 0.094 | 0.048 | 7.85E-16 | 1.4 | ACTR3C    | 1.958333333 |
| VMP12          | 3.65E-20 | 0.2009818 | 0.841 | 0.735 | 8.80E-16 | 1.4 | VMP1      | 1.144217687 |
| SNX62          | 4.77E-20 | 0.1897469 | 0.412 | 0.306 | 1.15E-15 | 1.4 | SNX6      | 1.346405229 |
| NRDE21         | 4.83E-20 | 0.1057111 | 0.062 | 0.027 | 1.16E-15 | 1.4 | NRDE2     | 2.296296296 |
| LRRC4C         | 4.89E-20 | 0.1797793 | 0.099 | 0.052 | 1.18E-15 | 1.4 | LRRC4C    | 1.903846154 |
| ESR21          | 5.13E-20 | 0.1634187 | 0.165 | 0.1   | 1.24E-15 | 1.4 | ESR2      | 1.65        |
| ZCCHC172       | 5.24E-20 | 0.1725175 | 0.348 | 0.248 | 1.26E-15 | 1.4 | ZCCHC17   | 1.403225806 |
| ZNF638         | 5.40E-20 | 0.1754328 | 0.555 | 0.43  | 1.30E-15 | 1.4 | ZNF638    | 1.290697674 |
| MAX3           | 5.97E-20 | 0.1154207 | 0.201 | 0.127 | 1.44E-15 | 1.4 | MAX       | 1.582677165 |
| MRPS18C2       | 6.02E-20 | 0.1496722 | 0.218 | 0.141 | 1.45E-15 | 1.4 | MRPS18C   | 1.546099291 |
| ZNF902         | 6.07E-20 | 0.237381  | 0.129 | 0.074 | 1.46E-15 | 1.4 | ZNF90     | 1.743243243 |
| PDGFC2         | 6.58E-20 | 0.1673544 | 0.309 | 0.215 | 1.59E-15 | 1.4 | PDGFC     | 1.437209302 |
| CCDC1741       | 7.00E-20 | 0.1616093 | 0.25  | 0.167 | 1.69E-15 | 1.4 | CCDC174   | 1.497005988 |
| AKR1B11        | 7.07E-20 | 0.156527  | 0.086 | 0.043 | 1.71E-15 | 1.4 | AKR1B1    | 2           |
| IL152          | 7.10E-20 | 0.1282812 | 0.058 | 0.024 | 1.71E-15 | 1.4 | IL15      | 2.416666667 |
| SPOP1          | 7.31E-20 | 0.1191907 | 0.137 | 0.079 | 1.76E-15 | 1.4 | SPOP      | 1.734177215 |
| EEA13          | 7.44E-20 | 0.160946  | 0.189 | 0.119 | 1.79E-15 | 1.4 | EEA1      | 1.588235294 |
| INTS6-AS13     | 7.75E-20 | 0.1307373 | 0.184 | 0.115 | 1.87E-15 | 1.4 | INTS6-AS1 | 1.6         |
| SESN32         | 7.95E-20 | 0.175826  | 0.088 | 0.045 | 1.92E-15 | 1.4 | SESN3     | 1.955555556 |
| TEFM1          | 8.11E-20 | 0.1088567 | 0.074 | 0.035 | 1.96E-15 | 1.4 | TEFM      | 2.114285714 |
| NMNAT21        | 8.14E-20 | 0.2057221 | 0.05  | 0.02  | 1.96E-15 | 1.4 | NMNAT2    | 2.5         |
| ZNF1691        | 9.54E-20 | 0.1082502 | 0.049 | 0.019 | 2.30E-15 | 1.4 | ZNF169    | 2.578947368 |
| HLA-A1         | 1.01E-19 | 0.2170037 | 0.412 | 0.308 | 2.44E-15 | 1.4 | HLA-A     | 1.337662338 |
| GALK2          | 1.04E-19 | 0.1644308 | 0.124 | 0.07  | 2.52E-15 | 1.4 | GALK2     | 1.771428571 |
| KDM4C1         | 1.08E-19 | 0.1365408 | 0.107 | 0.058 | 2.59E-15 | 1.4 | KDM4C     | 1.844827586 |
| PHYKPL1        | 1.08E-19 | 0.1245941 | 0.078 | 0.038 | 2.60E-15 | 1.4 | PHYKPL    | 2.052631579 |
| ABCA31         | 1.11E-19 | 0.1199561 | 0.065 | 0.029 | 2.69E-15 | 1.4 | ABCA3     | 2.24137931  |
| ADCY31         | 1.15E-19 | 0.1088886 | 0.056 | 0.023 | 2.77E-15 | 1.4 | ADCY3     | 2.434782609 |
| FAXDC22        | 1.16E-19 | 0.1003412 | 0.054 | 0.022 | 2.80E-15 | 1.4 | FAXDC2    | 2.454545455 |
| PALLD2         | 1.20E-19 | 0.1772292 | 0.511 | 0.389 | 2.90E-15 | 1.4 | PALLD     | 1.313624679 |

|                |          |           |       |       |          |     |            |             |
|----------------|----------|-----------|-------|-------|----------|-----|------------|-------------|
| ROBO1          | 1.22E-19 | 0.1550969 | 0.114 | 0.063 | 2.93E-15 | 1.4 | ROBO1      | 1.80952381  |
| GCC21          | 1.25E-19 | 0.185865  | 0.398 | 0.296 | 3.02E-15 | 1.4 | GCC2       | 1.344594595 |
| TBC1D191       | 1.39E-19 | 0.1141424 | 0.049 | 0.019 | 3.36E-15 | 1.4 | TBC1D19    | 2.578947368 |
| EEF21          | 1.44E-19 | 0.3475186 | 0.503 | 0.399 | 3.47E-15 | 1.4 | EEF2       | 1.260651629 |
| HADH3          | 1.47E-19 | 0.1246307 | 0.162 | 0.098 | 3.54E-15 | 1.4 | HADH       | 1.653061224 |
| UBE2V22        | 2.47E-19 | 0.1836581 | 0.335 | 0.24  | 5.96E-15 | 1.4 | UBE2V2     | 1.395833333 |
| MRE11A1        | 2.75E-19 | 0.1431695 | 0.107 | 0.058 | 6.64E-15 | 1.4 | MRE11A     | 1.844827586 |
| SPDYE52        | 2.83E-19 | 0.1313505 | 0.103 | 0.055 | 6.83E-15 | 1.4 | SPDYE5     | 1.872727273 |
| DYM1           | 2.88E-19 | 0.1592894 | 0.311 | 0.218 | 6.95E-15 | 1.4 | DYM        | 1.426605505 |
| HMGXB4         | 2.92E-19 | 0.1663767 | 0.308 | 0.217 | 7.03E-15 | 1.4 | HMGXB4     | 1.419354839 |
| LNPEP1         | 3.08E-19 | 0.1513644 | 0.141 | 0.083 | 7.44E-15 | 1.4 | LNPEP      | 1.698795181 |
| ZADH2          | 3.18E-19 | 0.1090214 | 0.064 | 0.029 | 7.67E-15 | 1.4 | ZADH2      | 2.206896552 |
| TTN-AS11       | 3.59E-19 | 0.1363983 | 0.086 | 0.043 | 8.66E-15 | 1.4 | TTN-AS1    | 2           |
| SNAPC31        | 3.74E-19 | 0.1209162 | 0.116 | 0.065 | 9.03E-15 | 1.4 | SNAPC3     | 1.784615385 |
| TMEM14C1       | 3.98E-19 | 0.1232678 | 0.132 | 0.076 | 9.60E-15 | 1.4 | TMEM14C    | 1.736842105 |
| CTDSP21        | 4.43E-19 | 0.144966  | 0.247 | 0.166 | 1.07E-14 | 1.4 | CTDSP2     | 1.487951807 |
| FZD61          | 4.45E-19 | 0.1371497 | 0.085 | 0.043 | 1.07E-14 | 1.4 | FZD6       | 1.976744186 |
| ZNF5861        | 4.99E-19 | 0.1458137 | 0.154 | 0.093 | 1.20E-14 | 1.4 | ZNF586     | 1.655913978 |
| IFT741         | 5.11E-19 | 0.1277384 | 0.083 | 0.042 | 1.23E-14 | 1.4 | IFT74      | 1.976190476 |
| NFX11          | 5.15E-19 | 0.142068  | 0.22  | 0.144 | 1.24E-14 | 1.4 | NFX1       | 1.527777778 |
| NUP2141        | 5.51E-19 | 0.1444105 | 0.115 | 0.064 | 1.33E-14 | 1.4 | NUP214     | 1.796875    |
| EIF3D3         | 5.54E-19 | 0.1503477 | 0.425 | 0.316 | 1.34E-14 | 1.4 | EIF3D      | 1.344936709 |
| HDAC81         | 5.75E-19 | 0.1867952 | 0.327 | 0.235 | 1.39E-14 | 1.4 | HDAC8      | 1.391489362 |
| EZH11          | 6.24E-19 | 0.1431962 | 0.134 | 0.078 | 1.50E-14 | 1.4 | EZH1       | 1.717948718 |
| TMEM63A1       | 6.40E-19 | 0.1924811 | 0.101 | 0.055 | 1.54E-14 | 1.4 | TMEM63A    | 1.836363636 |
| DDI21          | 6.69E-19 | 0.1599399 | 0.151 | 0.092 | 1.61E-14 | 1.4 | DDI2       | 1.641304348 |
| ZNF321         | 7.41E-19 | 0.1101706 | 0.069 | 0.032 | 1.79E-14 | 1.4 | ZNF32      | 2.15625     |
| SENP6          | 9.52E-19 | 0.1622922 | 0.407 | 0.3   | 2.30E-14 | 1.4 | SENP6      | 1.356666667 |
| SEC31A2        | 9.93E-19 | 0.1488391 | 0.503 | 0.384 | 2.39E-14 | 1.4 | SEC31A     | 1.309895833 |
| CCDC1491       | 1.02E-18 | 0.1116925 | 0.054 | 0.023 | 2.46E-14 | 1.4 | CCDC149    | 2.347826087 |
| HM131          | 1.04E-18 | 0.1451468 | 0.194 | 0.124 | 2.50E-14 | 1.4 | HM13       | 1.564516129 |
| KIAA11091      | 1.04E-18 | 0.1618575 | 0.176 | 0.111 | 2.50E-14 | 1.4 | KIAA1109   | 1.585585586 |
| FOXK23         | 1.15E-18 | 0.1495932 | 0.303 | 0.212 | 2.77E-14 | 1.4 | FOXK2      | 1.429245283 |
| RFC13          | 1.19E-18 | 0.1266821 | 0.275 | 0.189 | 2.86E-14 | 1.4 | RFC1       | 1.455026455 |
| RBM51          | 1.22E-18 | 0.163331  | 0.218 | 0.144 | 2.94E-14 | 1.4 | RBM5       | 1.513888889 |
| PMM22          | 1.23E-18 | 0.1321584 | 0.119 | 0.067 | 2.96E-14 | 1.4 | PMM2       | 1.776119403 |
| GLG11          | 1.29E-18 | 0.1813844 | 0.266 | 0.184 | 3.11E-14 | 1.4 | GLG1       | 1.445652174 |
| ERGIC21        | 1.32E-18 | 0.174865  | 0.243 | 0.165 | 3.17E-14 | 1.4 | ERGIC2     | 1.472727273 |
| RP11-427J23.11 | 1.32E-18 | 0.1030162 | 0.047 | 0.018 | 3.17E-14 | 1.4 | RP11-427J2 | 2.611111111 |
| SNX242         | 1.38E-18 | 0.1479338 | 0.24  | 0.162 | 3.33E-14 | 1.4 | SNX24      | 1.481481481 |
| GPR841         | 1.41E-18 | 0.1573465 | 0.013 | 0.002 | 3.41E-14 | 1.4 | GPR84      | 6.5         |
| SMARCA41       | 1.45E-18 | 0.1690506 | 0.193 | 0.125 | 3.49E-14 | 1.4 | SMARCA4    | 1.544       |
| CSNK1E2        | 1.52E-18 | 0.1591928 | 0.307 | 0.219 | 3.67E-14 | 1.4 | CSNK1E     | 1.401826484 |
| ZMYM4-AS11     | 1.58E-18 | 0.1011089 | 0.07  | 0.033 | 3.80E-14 | 1.4 | ZMYM4-AS   | 2.121212121 |
| RFX71          | 1.59E-18 | 0.169486  | 0.177 | 0.112 | 3.85E-14 | 1.4 | RFX7       | 1.580357143 |
| MPZL22         | 1.63E-18 | 0.1401847 | 0.134 | 0.079 | 3.94E-14 | 1.4 | MPZL2      | 1.696202532 |
| AC007566.101   | 1.71E-18 | 0.1114716 | 0.077 | 0.038 | 4.13E-14 | 1.4 | AC007566.  | 2.026315789 |
| CEP112         | 1.73E-18 | 0.108465  | 0.069 | 0.032 | 4.16E-14 | 1.4 | CEP112     | 2.15625     |
| HAUS61         | 1.78E-18 | 0.1065568 | 0.06  | 0.027 | 4.29E-14 | 1.4 | HAUS6      | 2.222222222 |
| TUG11          | 1.90E-18 | 0.1416082 | 0.167 | 0.104 | 4.58E-14 | 1.4 | TUG1       | 1.605769231 |
| TECPR21        | 1.92E-18 | 0.1278934 | 0.07  | 0.033 | 4.64E-14 | 1.4 | TECPR2     | 2.121212121 |
| SUPT20H        | 2.20E-18 | 0.1302535 | 0.129 | 0.075 | 5.30E-14 | 1.4 | SUPT20H    | 1.72        |

|                |          |           |       |       |          |     |                        |             |
|----------------|----------|-----------|-------|-------|----------|-----|------------------------|-------------|
| PHB21          | 2.26E-18 | 0.112169  | 0.144 | 0.085 | 5.46E-14 | 1.4 | PHB2                   | 1.694117647 |
| CTD-2337A12.1  | 2.27E-18 | 0.2587924 | 0.272 | 0.191 | 5.48E-14 | 1.4 | CTD-2337A              | 1.42408377  |
| GLMN1          | 2.39E-18 | 0.1317023 | 0.086 | 0.044 | 5.77E-14 | 1.4 | GLMN                   | 1.954545455 |
| MVP1           | 2.48E-18 | 0.1198407 | 0.105 | 0.058 | 5.98E-14 | 1.4 | MVP                    | 1.810344828 |
| VPS531         | 2.69E-18 | 0.1576969 | 0.304 | 0.214 | 6.48E-14 | 1.4 | VPS53                  | 1.420560748 |
| WDR11          | 2.87E-18 | 0.1427547 | 0.136 | 0.08  | 6.91E-14 | 1.4 | WDR11                  | 1.7         |
| TYW31          | 2.91E-18 | 0.1226146 | 0.101 | 0.055 | 7.02E-14 | 1.4 | TYW3                   | 1.836363636 |
| NUPL21         | 3.26E-18 | 0.1048324 | 0.095 | 0.05  | 7.86E-14 | 1.4 | NUPL2                  | 1.9         |
| ATXN7L11       | 3.46E-18 | 0.1383797 | 0.107 | 0.059 | 8.35E-14 | 1.4 | ATXN7L1                | 1.813559322 |
| GATAD1         | 3.62E-18 | 0.1143948 | 0.073 | 0.035 | 8.74E-14 | 1.4 | GATAD1                 | 2.085714286 |
| ATN11          | 3.79E-18 | 0.1195349 | 0.083 | 0.042 | 9.13E-14 | 1.4 | ATN1                   | 1.976190476 |
| PDLIM31        | 3.89E-18 | 0.1718257 | 0.091 | 0.048 | 9.39E-14 | 1.4 | PDLIM3                 | 1.895833333 |
| UBLCP11        | 3.93E-18 | 0.1179326 | 0.1   | 0.054 | 9.47E-14 | 1.4 | UBLCP1                 | 1.851851852 |
| TMEM165        | 3.94E-18 | 0.1226089 | 0.633 | 0.508 | 9.51E-14 | 1.4 | TMEM165                | 1.246062992 |
| C15orf411      | 3.97E-18 | 0.1363287 | 0.089 | 0.047 | 9.57E-14 | 1.4 | C15orf41               | 1.893617021 |
| DPP8           | 4.38E-18 | 0.1721995 | 0.142 | 0.086 | 1.06E-13 | 1.4 | DPP8                   | 1.651162791 |
| SPNS21         | 4.56E-18 | 0.1508402 | 0.092 | 0.049 | 1.10E-13 | 1.4 | SPNS2                  | 1.87755102  |
| PPP2R5C2       | 4.65E-18 | 0.1622723 | 0.24  | 0.163 | 1.12E-13 | 1.4 | PPP2R5C                | 1.472392638 |
| NEK11          | 4.72E-18 | 0.1543757 | 0.121 | 0.07  | 1.14E-13 | 1.4 | NEK1                   | 1.728571429 |
| HLA-E2         | 4.79E-18 | 0.1823802 | 0.142 | 0.086 | 1.15E-13 | 1.4 | HLA-E                  | 1.651162791 |
| MCPH11         | 5.83E-18 | 0.1891669 | 0.243 | 0.168 | 1.41E-13 | 1.4 | MCPH1                  | 1.446428571 |
| ZNF7211        | 6.59E-18 | 0.1963313 | 0.262 | 0.182 | 1.59E-13 | 1.4 | ZNF721                 | 1.43956044  |
| PPL2           | 6.87E-18 | 0.1146873 | 0.114 | 0.065 | 1.66E-13 | 1.4 | PPL                    | 1.753846154 |
| RP11-849H4.21  | 7.39E-18 | 0.1001593 | 0.053 | 0.023 | 1.78E-13 | 1.4 | RP11-849H              | 2.304347826 |
| NNMT           | 9.17E-18 | 0.2505632 | 0.162 | 0.102 | 2.21E-13 | 1.4 | NNMT                   | 1.588235294 |
| TNS31          | 9.36E-18 | 0.1935199 | 0.114 | 0.065 | 2.26E-13 | 1.4 | TNS3                   | 1.753846154 |
| GALNT111       | 9.49E-18 | 0.15052   | 0.131 | 0.078 | 2.29E-13 | 1.4 | GALNT11                | 1.679487179 |
| PMPCB1         | 9.83E-18 | 0.1163496 | 0.085 | 0.044 | 2.37E-13 | 1.4 | PMPCB                  | 1.931818182 |
| CASP81         | 1.13E-17 | 0.1191456 | 0.075 | 0.037 | 2.72E-13 | 1.4 | CASP8                  | 2.027027027 |
| NOL31          | 1.31E-17 | 0.1247499 | 0.078 | 0.04  | 3.15E-13 | 1.4 | NOL3                   | 1.95        |
| TATDN3         | 1.36E-17 | 0.1291524 | 0.059 | 0.027 | 3.29E-13 | 1.4 | TATDN3                 | 2.185185185 |
| PHF5A2         | 1.39E-17 | 0.1283544 | 0.222 | 0.149 | 3.35E-13 | 1.4 | PHF5A                  | 1.489932886 |
| NDUF71         | 1.44E-17 | 0.1185463 | 0.099 | 0.054 | 3.47E-13 | 1.4 | NDUF71                 | 1.833333333 |
| PXDN2          | 1.45E-17 | 0.1156942 | 0.144 | 0.087 | 3.49E-13 | 1.4 | PXDN                   | 1.655172414 |
| MT2A1          | 1.47E-17 | 0.5274459 | 0.1   | 0.055 | 3.54E-13 | 1.4 | MT2A                   | 1.818181818 |
| CEP1701        | 1.50E-17 | 0.1197039 | 0.116 | 0.066 | 3.62E-13 | 1.4 | CEP170                 | 1.757575758 |
| RP11-499P20.21 | 1.57E-17 | 0.1096472 | 0.071 | 0.035 | 3.79E-13 | 1.4 | RP11-499P              | 2.028571429 |
| TFDP21         | 1.61E-17 | 0.1355694 | 0.277 | 0.195 | 3.89E-13 | 1.4 | TFDP2                  | 1.420512821 |
| CBR31          | 1.72E-17 | 0.1224717 | 0.055 | 0.024 | 4.15E-13 | 1.4 | CBR3                   | 2.291666667 |
| SLC25A251      | 1.75E-17 | 0.1984786 | 0.178 | 0.116 | 4.23E-13 | 1.4 | SLC25A25               | 1.534482759 |
| VIM3           | 1.76E-17 | 0.111904  | 0.183 | 0.117 | 4.24E-13 | 1.4 | VIM                    | 1.564102564 |
| HADHA2         | 1.85E-17 | 0.1472925 | 0.371 | 0.272 | 4.46E-13 | 1.4 | HADHA                  | 1.363970588 |
| EPS152         | 1.85E-17 | 0.181375  | 0.276 | 0.196 | 4.47E-13 | 1.4 | EPS15                  | 1.408163265 |
| PPP1R12B1      | 1.87E-17 | 0.1996867 | 0.295 | 0.211 | 4.50E-13 | 1.4 | PPP1R12B               | 1.398104265 |
| NEO1           | 1.88E-17 | 0.1596336 | 0.15  | 0.092 | 4.54E-13 | 1.4 | NEO1                   | 1.630434783 |
| SLC30A71       | 2.11E-17 | 0.1803171 | 0.18  | 0.116 | 5.10E-13 | 1.4 | SLC30A7                | 1.551724138 |
| WDR701         | 2.16E-17 | 0.179072  | 0.208 | 0.139 | 5.21E-13 | 1.4 | WDR70                  | 1.496402878 |
| WDR71          | 2.17E-17 | 0.1449651 | 0.091 | 0.048 | 5.24E-13 | 1.4 | WDR7                   | 1.895833333 |
| DRG12          | 2.27E-17 | 0.129826  | 0.247 | 0.169 | 5.47E-13 | 1.4 | DRG1                   | 1.461538462 |
| TRAF3IP2-AS11  | 2.28E-17 | 0.1328132 | 0.154 | 0.096 | 5.51E-13 | 1.4 | TRAF3IP2- <del>A</del> | 1.604166667 |
| ZBTB46         | 2.36E-17 | 0.1180372 | 0.099 | 0.055 | 5.70E-13 | 1.4 | ZBTB46                 | 1.8         |
| AASDH1         | 2.50E-17 | 0.1030757 | 0.093 | 0.05  | 6.03E-13 | 1.4 | AASDH                  | 1.86        |

|             |          |           |       |       |          |     |           |             |
|-------------|----------|-----------|-------|-------|----------|-----|-----------|-------------|
| TUBD11      | 2.58E-17 | 0.104843  | 0.073 | 0.036 | 6.21E-13 | 1.4 | TUBD1     | 2.027777778 |
| DAB2IP3     | 2.83E-17 | 0.144897  | 0.129 | 0.077 | 6.82E-13 | 1.4 | DAB2IP    | 1.675324675 |
| VPS361      | 2.89E-17 | 0.1409015 | 0.157 | 0.098 | 6.98E-13 | 1.4 | VPS36     | 1.602040816 |
| PGS11       | 3.04E-17 | 0.10465   | 0.036 | 0.013 | 7.33E-13 | 1.4 | PGS1      | 2.769230769 |
| HIST1H4C3   | 3.15E-17 | 0.1722294 | 0.233 | 0.16  | 7.59E-13 | 1.4 | HIST1H4C  | 1.45625     |
| ARRDC3-AS12 | 3.32E-17 | 0.1300866 | 0.064 | 0.03  | 8.02E-13 | 1.4 | ARRDC3-AS | 2.133333333 |
| VDAC33      | 3.34E-17 | 0.1337614 | 0.354 | 0.258 | 8.05E-13 | 1.4 | VDAC3     | 1.372093023 |
| GREB12      | 3.86E-17 | 0.2274356 | 0.115 | 0.067 | 9.31E-13 | 1.4 | GREB1     | 1.71641791  |
| HERC21      | 3.93E-17 | 0.1570514 | 0.117 | 0.068 | 9.48E-13 | 1.4 | HERC2     | 1.720588235 |
| SERPINE21   | 4.05E-17 | 0.1427718 | 0.072 | 0.036 | 9.77E-13 | 1.4 | SERPINE2  | 2           |
| ERAP12      | 4.77E-17 | 0.1017388 | 0.111 | 0.063 | 1.15E-12 | 1.4 | ERAP1     | 1.761904762 |
| PIK3C2G2    | 5.02E-17 | 0.1908615 | 0.105 | 0.06  | 1.21E-12 | 1.4 | PIK3C2G   | 1.75        |
| ZFAND13     | 5.21E-17 | 0.1206023 | 0.253 | 0.175 | 1.26E-12 | 1.4 | ZFAND1    | 1.445714286 |
| INTS31      | 5.26E-17 | 0.1111066 | 0.093 | 0.051 | 1.27E-12 | 1.4 | INTS3     | 1.823529412 |
| GGA22       | 5.74E-17 | 0.1529155 | 0.159 | 0.1   | 1.38E-12 | 1.4 | GGA2      | 1.59        |
| TEAD21      | 5.75E-17 | 0.1215634 | 0.12  | 0.07  | 1.39E-12 | 1.4 | TEAD2     | 1.714285714 |
| MCF2L23     | 5.93E-17 | 0.175153  | 0.15  | 0.094 | 1.43E-12 | 1.4 | MCF2L2    | 1.595744681 |
| BRCC31      | 6.05E-17 | 0.1040147 | 0.091 | 0.048 | 1.46E-12 | 1.4 | BRCC3     | 1.895833333 |
| PSMC12      | 6.09E-17 | 0.1351501 | 0.365 | 0.269 | 1.47E-12 | 1.4 | PSMC1     | 1.356877323 |
| MFF         | 7.19E-17 | 0.1160838 | 0.124 | 0.073 | 1.73E-12 | 1.4 | MFF       | 1.698630137 |
| C5orf45     | 7.20E-17 | 0.1260667 | 0.068 | 0.033 | 1.74E-12 | 1.4 | C5orf45   | 2.060606061 |
| FAM120B1    | 8.09E-17 | 0.1578993 | 0.176 | 0.114 | 1.95E-12 | 1.4 | FAM120B   | 1.543859649 |
| CFDP11      | 8.23E-17 | 0.1794388 | 0.242 | 0.169 | 1.98E-12 | 1.4 | CFDP1     | 1.431952663 |
| CLK4        | 8.30E-17 | 0.1294161 | 0.115 | 0.066 | 2.00E-12 | 1.4 | CLK4      | 1.742424242 |
| PSMB21      | 9.25E-17 | 0.127746  | 0.179 | 0.115 | 2.23E-12 | 1.4 | PSMB2     | 1.556521739 |
| SCLT1       | 1.01E-16 | 0.1678418 | 0.089 | 0.048 | 2.44E-12 | 1.4 | SCLT1     | 1.854166667 |
| PDGFRL2     | 1.17E-16 | 0.2695004 | 0.082 | 0.044 | 2.82E-12 | 1.4 | PDGFRL    | 1.863636364 |
| PLAGL13     | 1.23E-16 | 0.1026368 | 0.072 | 0.036 | 2.96E-12 | 1.4 | PLAGL1    | 2           |
| N4BP11      | 1.33E-16 | 0.1657911 | 0.245 | 0.171 | 3.21E-12 | 1.4 | N4BP1     | 1.432748538 |
| VPS13C1     | 1.51E-16 | 0.1559146 | 0.321 | 0.234 | 3.65E-12 | 1.4 | VPS13C    | 1.371794872 |
| HYDIN       | 1.70E-16 | 0.1332937 | 0.052 | 0.023 | 4.09E-12 | 1.4 | HYDIN     | 2.260869565 |
| TMEM51-AS12 | 1.81E-16 | 0.1014235 | 0.045 | 0.019 | 4.35E-12 | 1.4 | TMEM51-A  | 2.368421053 |
| GTF2H51     | 1.82E-16 | 0.1112924 | 0.293 | 0.207 | 4.39E-12 | 1.4 | GTF2H5    | 1.415458937 |
| RPS282      | 2.01E-16 | 0.3580799 | 0.131 | 0.081 | 4.84E-12 | 1.4 | RPS28     | 1.617283951 |
| LINC015151  | 2.02E-16 | 0.1087695 | 0.063 | 0.03  | 4.86E-12 | 1.4 | LINC01515 | 2.1         |
| CCT83       | 2.08E-16 | 0.1353854 | 0.369 | 0.272 | 5.00E-12 | 1.4 | CCT8      | 1.356617647 |
| COPS42      | 2.15E-16 | 0.1241796 | 0.156 | 0.098 | 5.19E-12 | 1.4 | COPS4     | 1.591836735 |
| LYRM21      | 2.24E-16 | 0.1313275 | 0.149 | 0.094 | 5.40E-12 | 1.4 | LYRM2     | 1.585106383 |
| RPL383      | 2.72E-16 | 0.1290255 | 0.927 | 0.887 | 6.57E-12 | 1.4 | RPL38     | 1.045095829 |
| VPS511      | 2.87E-16 | 0.1224345 | 0.083 | 0.044 | 6.92E-12 | 1.4 | VPS51     | 1.886363636 |
| OXCT11      | 2.87E-16 | 0.1093927 | 0.06  | 0.028 | 6.93E-12 | 1.4 | OXCT1     | 2.142857143 |
| TCAF22      | 3.17E-16 | 0.1647561 | 0.148 | 0.093 | 7.65E-12 | 1.4 | TCAF2     | 1.591397849 |
| SUPT4H11    | 3.25E-16 | 0.1479276 | 0.346 | 0.255 | 7.84E-12 | 1.4 | SUPT4H1   | 1.356862745 |
| CLEC16A     | 3.28E-16 | 0.1429275 | 0.222 | 0.151 | 7.90E-12 | 1.4 | CLEC16A   | 1.470198675 |
| SOX63       | 3.29E-16 | 0.1601821 | 0.13  | 0.079 | 7.93E-12 | 1.4 | SOX6      | 1.64556962  |
| ZNF6211     | 3.30E-16 | 0.109436  | 0.083 | 0.044 | 7.96E-12 | 1.4 | ZNF621    | 1.886363636 |
| RFWD21      | 3.60E-16 | 0.1611377 | 0.387 | 0.291 | 8.69E-12 | 1.4 | RFWD2     | 1.329896907 |
| MCTP11      | 3.88E-16 | 0.2142356 | 0.148 | 0.094 | 9.35E-12 | 1.4 | MCTP1     | 1.574468085 |
| PAIP12      | 3.93E-16 | 0.1385431 | 0.22  | 0.15  | 9.47E-12 | 1.4 | PAIP1     | 1.466666667 |
| NEDD12      | 4.01E-16 | 0.1207159 | 0.096 | 0.054 | 9.66E-12 | 1.4 | NEDD1     | 1.777777778 |
| ATXN101     | 4.11E-16 | 0.1475914 | 0.207 | 0.14  | 9.91E-12 | 1.4 | ATXN10    | 1.478571429 |
| IRAK21      | 4.37E-16 | 0.1397534 | 0.185 | 0.122 | 1.05E-11 | 1.4 | IRAK2     | 1.516393443 |



|                |          |           |       |       |          |     |            |             |
|----------------|----------|-----------|-------|-------|----------|-----|------------|-------------|
| RP11-415J8.31  | 4.79E-16 | 0.1377707 | 0.087 | 0.047 | 1.15E-11 | 1.4 | RP11-415J8 | 1.85106383  |
| KEAP11         | 4.91E-16 | 0.1786759 | 0.057 | 0.027 | 1.18E-11 | 1.4 | KEAP1      | 2.111111111 |
| USP33          | 5.03E-16 | 0.1615051 | 0.299 | 0.216 | 1.21E-11 | 1.4 | USP33      | 1.384259259 |
| GIT22          | 5.35E-16 | 0.1169944 | 0.098 | 0.055 | 1.29E-11 | 1.4 | GIT2       | 1.781818182 |
| ARL151         | 5.68E-16 | 0.1772806 | 0.278 | 0.2   | 1.37E-11 | 1.4 | ARL15      | 1.39        |
| PUM33          | 5.81E-16 | 0.1389823 | 0.237 | 0.163 | 1.40E-11 | 1.4 | PUM3       | 1.45398773  |
| XPO53          | 6.13E-16 | 0.1351313 | 0.145 | 0.091 | 1.48E-11 | 1.4 | XPO5       | 1.593406593 |
| GNAQ1          | 6.30E-16 | 0.1576414 | 0.398 | 0.3   | 1.52E-11 | 1.4 | GNAQ       | 1.326666667 |
| AGAP91         | 6.61E-16 | 0.1056852 | 0.036 | 0.014 | 1.59E-11 | 1.4 | AGAP9      | 2.571428571 |
| ADPRM3         | 6.86E-16 | 0.1132642 | 0.103 | 0.059 | 1.65E-11 | 1.4 | ADPRM      | 1.745762712 |
| FBXW4          | 6.87E-16 | 0.137911  | 0.134 | 0.082 | 1.66E-11 | 1.4 | FBXW4      | 1.634146341 |
| ALOX12-AS11    | 7.25E-16 | 0.1288894 | 0.104 | 0.06  | 1.75E-11 | 1.4 | ALOX12-AS  | 1.733333333 |
| CFL23          | 7.50E-16 | 0.1080977 | 0.119 | 0.07  | 1.81E-11 | 1.4 | CFL2       | 1.7         |
| IGFL11         | 7.52E-16 | 0.1042252 | 0.019 | 0.005 | 1.81E-11 | 1.4 | IGFL1      | 3.8         |
| PURA           | 7.87E-16 | 0.1019599 | 0.11  | 0.064 | 1.90E-11 | 1.4 | PURA       | 1.71875     |
| ALOX52         | 8.03E-16 | 0.1680279 | 0.161 | 0.104 | 1.94E-11 | 1.4 | ALOX5      | 1.548076923 |
| GTF2B2         | 8.19E-16 | 0.121707  | 0.237 | 0.163 | 1.98E-11 | 1.4 | GTF2B      | 1.45398773  |
| CLTA1          | 8.76E-16 | 0.1333805 | 0.213 | 0.145 | 2.11E-11 | 1.4 | CLTA       | 1.468965517 |
| SMARCAD11      | 9.54E-16 | 0.1159935 | 0.1   | 0.057 | 2.30E-11 | 1.4 | SMARCAD1   | 1.754385965 |
| WARS1          | 9.74E-16 | 0.1474772 | 0.108 | 0.063 | 2.35E-11 | 1.4 | WARS       | 1.714285714 |
| OFD13          | 9.91E-16 | 0.1404497 | 0.327 | 0.242 | 2.39E-11 | 1.4 | OFD1       | 1.351239669 |
| ZZZ31          | 9.92E-16 | 0.1775136 | 0.236 | 0.165 | 2.39E-11 | 1.4 | ZZZ3       | 1.43030303  |
| CDH32          | 1.04E-15 | 0.1500095 | 0.177 | 0.117 | 2.50E-11 | 1.4 | CDH3       | 1.512820513 |
| FAF21          | 1.07E-15 | 0.1631086 | 0.223 | 0.154 | 2.58E-11 | 1.4 | FAF2       | 1.448051948 |
| ZNF718         | 1.17E-15 | 0.1277555 | 0.105 | 0.061 | 2.81E-11 | 1.4 | ZNF718     | 1.721311475 |
| RPL152         | 1.21E-15 | 0.3039601 | 0.815 | 0.774 | 2.92E-11 | 1.4 | RPL15      | 1.052971576 |
| AGFG12         | 1.33E-15 | 0.1321857 | 0.412 | 0.311 | 3.21E-11 | 1.4 | AGFG1      | 1.324758842 |
| ZNF1411        | 1.33E-15 | 0.1170138 | 0.091 | 0.05  | 3.21E-11 | 1.4 | ZNF141     | 1.82        |
| PTGFRN1        | 1.41E-15 | 0.1447073 | 0.148 | 0.094 | 3.41E-11 | 1.4 | PTGFRN     | 1.574468085 |
| RP11-123O10.41 | 1.57E-15 | 0.1562561 | 0.284 | 0.204 | 3.78E-11 | 1.4 | RP11-123O  | 1.392156863 |
| S100A133       | 1.66E-15 | 0.1239278 | 0.621 | 0.501 | 4.01E-11 | 1.4 | S100A13    | 1.239520958 |
| ZDHHC171       | 1.66E-15 | 0.1515676 | 0.122 | 0.074 | 4.01E-11 | 1.4 | ZDHHC17    | 1.648648649 |
| SLC25A432      | 2.08E-15 | 0.1034196 | 0.068 | 0.034 | 5.01E-11 | 1.4 | SLC25A43   | 2           |
| KRBOX41        | 2.32E-15 | 0.131052  | 0.068 | 0.035 | 5.60E-11 | 1.4 | KRBOX4     | 1.942857143 |
| ARL17B         | 2.33E-15 | 0.200342  | 0.117 | 0.07  | 5.62E-11 | 1.4 | ARL17B     | 1.671428571 |
| FARS21         | 2.47E-15 | 0.1637679 | 0.129 | 0.08  | 5.97E-11 | 1.4 | FARS2      | 1.6125      |
| LRIF11         | 2.62E-15 | 0.1061039 | 0.106 | 0.062 | 6.31E-11 | 1.4 | LRIF1      | 1.709677419 |
| GAPDH1         | 2.65E-15 | 0.2271625 | 0.657 | 0.555 | 6.38E-11 | 1.4 | GAPDH      | 1.183783784 |
| SCOC1          | 3.00E-15 | 0.1281007 | 0.317 | 0.232 | 7.25E-11 | 1.4 | SCOC       | 1.36637931  |
| DAB1           | 3.42E-15 | 0.1262769 | 0.094 | 0.054 | 8.24E-11 | 1.4 | DAB1       | 1.740740741 |
| MMS191         | 3.44E-15 | 0.106166  | 0.076 | 0.04  | 8.29E-11 | 1.4 | MMS19      | 1.9         |
| S100PBP1       | 3.71E-15 | 0.1448038 | 0.159 | 0.103 | 8.95E-11 | 1.4 | S100PBP    | 1.54368932  |
| PLCH11         | 3.91E-15 | 0.1052101 | 0.058 | 0.028 | 9.43E-11 | 1.4 | PLCH1      | 2.071428571 |
| GK51           | 3.97E-15 | 0.1067942 | 0.085 | 0.047 | 9.58E-11 | 1.4 | GK5        | 1.808510638 |
| TMEM512        | 3.99E-15 | 0.1255935 | 0.211 | 0.144 | 9.63E-11 | 1.4 | TMEM51     | 1.465277778 |
| TSTD2          | 4.23E-15 | 0.1024792 | 0.083 | 0.045 | 1.02E-10 | 1.4 | TSTD2      | 1.844444444 |
| LRRK12         | 4.30E-15 | 0.1256154 | 0.093 | 0.052 | 1.04E-10 | 1.4 | LRRK1      | 1.788461538 |
| OVOL21         | 4.32E-15 | 0.1063455 | 0.103 | 0.059 | 1.04E-10 | 1.4 | OVOL2      | 1.745762712 |
| APBA2          | 4.81E-15 | 0.1136249 | 0.093 | 0.052 | 1.16E-10 | 1.4 | APBA2      | 1.788461538 |
| HIST2H2BF1     | 4.91E-15 | 0.1038681 | 0.063 | 0.032 | 1.18E-10 | 1.4 | HIST2H2BF  | 1.96875     |
| ZCCHC23        | 5.36E-15 | 0.156326  | 0.301 | 0.221 | 1.29E-10 | 1.4 | ZCCHC2     | 1.36199095  |
| KMT5B1         | 6.15E-15 | 0.1413861 | 0.224 | 0.155 | 1.48E-10 | 1.4 | KMT5B      | 1.44516129  |

|                |          |           |       |       |          |     |           |             |
|----------------|----------|-----------|-------|-------|----------|-----|-----------|-------------|
| RBM61          | 6.15E-15 | 0.1498612 | 0.432 | 0.329 | 1.48E-10 | 1.4 | RBM6      | 1.313069909 |
| SRD5A3         | 6.79E-15 | 0.104775  | 0.112 | 0.066 | 1.64E-10 | 1.4 | SRD5A3    | 1.696969697 |
| PHF20L1        | 7.64E-15 | 0.1564201 | 0.176 | 0.117 | 1.84E-10 | 1.4 | PHF20L1   | 1.504273504 |
| CCDC90B1       | 8.17E-15 | 0.1151661 | 0.132 | 0.082 | 1.97E-10 | 1.4 | CCDC90B   | 1.609756098 |
| PRPF40B1       | 8.62E-15 | 0.1242082 | 0.058 | 0.028 | 2.08E-10 | 1.4 | PRPF40B   | 2.071428571 |
| ANXA4          | 9.28E-15 | 0.118042  | 0.158 | 0.102 | 2.24E-10 | 1.4 | ANXA4     | 1.549019608 |
| GATA62         | 9.55E-15 | 0.1017523 | 0.069 | 0.036 | 2.30E-10 | 1.4 | GATA6     | 1.916666667 |
| SCMH11         | 9.86E-15 | 0.1330785 | 0.314 | 0.231 | 2.38E-10 | 1.4 | SCMH1     | 1.359307359 |
| STAT2          | 1.04E-14 | 0.1435094 | 0.13  | 0.081 | 2.50E-10 | 1.4 | STAT2     | 1.604938272 |
| EPS8L21        | 1.04E-14 | 0.1576817 | 0.052 | 0.024 | 2.50E-10 | 1.4 | EPS8L2    | 2.166666667 |
| SMYD41         | 1.04E-14 | 0.1219692 | 0.05  | 0.023 | 2.51E-10 | 1.4 | SMYD4     | 2.173913043 |
| PAXBP1         | 1.13E-14 | 0.1263877 | 0.14  | 0.089 | 2.73E-10 | 1.4 | PAXBP1    | 1.573033708 |
| RAD54L21       | 1.19E-14 | 0.1100165 | 0.068 | 0.035 | 2.88E-10 | 1.4 | RAD54L2   | 1.942857143 |
| TIPRL1         | 1.22E-14 | 0.1070215 | 0.099 | 0.057 | 2.94E-10 | 1.4 | TIPRL     | 1.736842105 |
| SETDB11        | 1.24E-14 | 0.1300207 | 0.121 | 0.074 | 2.98E-10 | 1.4 | SETDB1    | 1.635135135 |
| COMMD62        | 1.36E-14 | 0.1271855 | 0.443 | 0.345 | 3.29E-10 | 1.4 | COMMD6    | 1.284057971 |
| C11orf541      | 1.40E-14 | 0.1313216 | 0.152 | 0.099 | 3.38E-10 | 1.4 | C11orf54  | 1.535353535 |
| ZNF248         | 1.51E-14 | 0.1336    | 0.09  | 0.051 | 3.64E-10 | 1.4 | ZNF248    | 1.764705882 |
| LHFP1          | 1.55E-14 | 0.1247335 | 0.058 | 0.029 | 3.73E-10 | 1.4 | LHFP      | 2           |
| STAMBP1        | 1.55E-14 | 0.1368638 | 0.225 | 0.157 | 3.74E-10 | 1.4 | STAMBP    | 1.433121019 |
| MAPRE21        | 1.57E-14 | 0.1692438 | 0.181 | 0.122 | 3.79E-10 | 1.4 | MAPRE2    | 1.483606557 |
| RNF131         | 1.63E-14 | 0.1497521 | 0.351 | 0.264 | 3.93E-10 | 1.4 | RNF13     | 1.329545455 |
| SLC30A61       | 1.83E-14 | 0.1174883 | 0.091 | 0.052 | 4.40E-10 | 1.4 | SLC30A6   | 1.75        |
| MTERF1         | 1.89E-14 | 0.1325023 | 0.128 | 0.08  | 4.55E-10 | 1.4 | MTERF1    | 1.6         |
| SH3PXD2A2      | 2.03E-14 | 0.10208   | 0.145 | 0.093 | 4.89E-10 | 1.4 | SH3PXD2A  | 1.559139785 |
| PRKAG11        | 2.04E-14 | 0.1095153 | 0.197 | 0.134 | 4.93E-10 | 1.4 | PRKAG1    | 1.470149254 |
| CIRBP1         | 2.35E-14 | 0.1285536 | 0.067 | 0.035 | 5.66E-10 | 1.4 | CIRBP     | 1.914285714 |
| UGP22          | 2.45E-14 | 0.1461833 | 0.532 | 0.424 | 5.90E-10 | 1.4 | UGP2      | 1.254716981 |
| TTC171         | 2.56E-14 | 0.1553818 | 0.376 | 0.287 | 6.17E-10 | 1.4 | TTC17     | 1.31010453  |
| DDX521         | 2.80E-14 | 0.1228211 | 0.151 | 0.097 | 6.76E-10 | 1.4 | DDX52     | 1.556701031 |
| R3HDM11        | 2.82E-14 | 0.1142055 | 0.101 | 0.059 | 6.79E-10 | 1.4 | R3HDM1    | 1.711864407 |
| TRNAU1AP2      | 2.83E-14 | 0.1163633 | 0.305 | 0.223 | 6.82E-10 | 1.4 | TRNAU1AP  | 1.367713004 |
| DMGDH          | 2.91E-14 | 0.1124283 | 0.08  | 0.044 | 7.02E-10 | 1.4 | DMGDH     | 1.818181818 |
| SSBP12         | 3.04E-14 | 0.1226486 | 0.45  | 0.35  | 7.33E-10 | 1.4 | SSBP1     | 1.285714286 |
| FAM196A1       | 3.04E-14 | 0.1210705 | 0.099 | 0.058 | 7.34E-10 | 1.4 | FAM196A   | 1.706896552 |
| ZNF2741        | 3.04E-14 | 0.1255724 | 0.133 | 0.083 | 7.34E-10 | 1.4 | ZNF274    | 1.602409639 |
| PWWP2A1        | 3.10E-14 | 0.1120183 | 0.093 | 0.054 | 7.47E-10 | 1.4 | PWWP2A    | 1.722222222 |
| DIS32          | 3.13E-14 | 0.1270137 | 0.106 | 0.064 | 7.54E-10 | 1.4 | DIS3      | 1.65625     |
| TMTC21         | 3.22E-14 | 0.1620982 | 0.47  | 0.368 | 7.76E-10 | 1.4 | TMTC2     | 1.277173913 |
| KDM1B1         | 3.34E-14 | 0.1044509 | 0.088 | 0.05  | 8.04E-10 | 1.4 | KDM1B     | 1.76        |
| DEK2           | 3.53E-14 | 0.1129579 | 0.26  | 0.187 | 8.50E-10 | 1.4 | DEK       | 1.390374332 |
| ZNF2131        | 3.69E-14 | 0.1036427 | 0.049 | 0.023 | 8.91E-10 | 1.4 | ZNF213    | 2.130434783 |
| PYGB1          | 3.87E-14 | 0.106715  | 0.063 | 0.032 | 9.34E-10 | 1.4 | PYGB      | 1.96875     |
| RP11-530C5.11  | 4.07E-14 | 0.125948  | 0.06  | 0.03  | 9.81E-10 | 1.4 | RP11-530C | 2           |
| PCBP22         | 4.39E-14 | 0.1498209 | 0.665 | 0.559 | 1.06E-09 | 1.4 | PCBP2     | 1.189624329 |
| AGBL51         | 5.56E-14 | 0.1005445 | 0.071 | 0.038 | 1.34E-09 | 1.4 | AGBL5     | 1.868421053 |
| RP11-382A20.51 | 5.56E-14 | 0.1166475 | 0.088 | 0.05  | 1.34E-09 | 1.4 | RP11-382A | 1.76        |
| SRSF71         | 5.57E-14 | 0.1339782 | 0.334 | 0.25  | 1.34E-09 | 1.4 | SRSF7     | 1.336       |
| PMS11          | 5.58E-14 | 0.1069008 | 0.081 | 0.045 | 1.35E-09 | 1.4 | PMS1      | 1.8         |
| ERH1           | 5.87E-14 | 0.1064577 | 0.617 | 0.492 | 1.42E-09 | 1.4 | ERH       | 1.254065041 |
| IL4R           | 6.28E-14 | 0.1228597 | 0.198 | 0.136 | 1.51E-09 | 1.4 | IL4R      | 1.455882353 |
| CENPO2         | 6.38E-14 | 0.176768  | 0.037 | 0.015 | 1.54E-09 | 1.4 | CENPO     | 2.466666667 |

|                |          |           |       |       |          |     |            |             |
|----------------|----------|-----------|-------|-------|----------|-----|------------|-------------|
| MAK            | 6.44E-14 | 0.1336939 | 0.135 | 0.086 | 1.55E-09 | 1.4 | MAK        | 1.569767442 |
| RP11-417F21.12 | 6.51E-14 | 0.1167528 | 0.141 | 0.091 | 1.57E-09 | 1.4 | RP11-417F  | 1.549450549 |
| TTF11          | 7.55E-14 | 0.1004376 | 0.167 | 0.11  | 1.82E-09 | 1.4 | TTF1       | 1.518181818 |
| GSTO21         | 7.56E-14 | 0.1020968 | 0.142 | 0.091 | 1.82E-09 | 1.4 | GSTO2      | 1.56043956  |
| KIAA11472      | 7.66E-14 | 0.1106263 | 0.101 | 0.06  | 1.85E-09 | 1.4 | KIAA1147   | 1.683333333 |
| STX72          | 8.28E-14 | 0.1212031 | 0.174 | 0.117 | 2.00E-09 | 1.4 | STX7       | 1.487179487 |
| TMC4           | 8.28E-14 | 0.1147471 | 0.063 | 0.032 | 2.00E-09 | 1.4 | TMC4       | 1.96875     |
| ITGB3BP2       | 8.82E-14 | 0.123012  | 0.121 | 0.075 | 2.13E-09 | 1.4 | ITGB3BP    | 1.613333333 |
| HIST2H2BE      | 9.15E-14 | 0.1559692 | 0.16  | 0.106 | 2.21E-09 | 1.4 | HIST2H2BE  | 1.509433962 |
| RUFY21         | 9.73E-14 | 0.100698  | 0.112 | 0.068 | 2.35E-09 | 1.4 | RUFY2      | 1.647058824 |
| YLPM11         | 1.00E-13 | 0.1391763 | 0.177 | 0.12  | 2.42E-09 | 1.4 | YLPM1      | 1.475       |
| SNX10          | 1.02E-13 | 0.1087633 | 0.109 | 0.066 | 2.47E-09 | 1.4 | SNX10      | 1.651515152 |
| RDX3           | 1.09E-13 | 0.1034342 | 0.216 | 0.15  | 2.62E-09 | 1.4 | RDX        | 1.44        |
| MRPS272        | 1.12E-13 | 0.1078463 | 0.103 | 0.062 | 2.69E-09 | 1.4 | MRPS27     | 1.661290323 |
| RPL182         | 1.17E-13 | 0.2484909 | 0.133 | 0.086 | 2.83E-09 | 1.4 | RPL18      | 1.546511628 |
| RBPJ1          | 1.26E-13 | 0.1274832 | 0.437 | 0.341 | 3.04E-09 | 1.4 | RBPJ       | 1.281524927 |
| RP5-1101C3.1   | 1.27E-13 | 0.1175986 | 0.095 | 0.056 | 3.06E-09 | 1.4 | RP5-1101C  | 1.696428571 |
| CMTM73         | 1.30E-13 | 0.1282559 | 0.216 | 0.152 | 3.14E-09 | 1.4 | CMTM7      | 1.421052632 |
| LTA4H3         | 1.31E-13 | 0.1280998 | 0.123 | 0.077 | 3.15E-09 | 1.4 | LTA4H      | 1.597402597 |
| CELF12         | 1.35E-13 | 0.1426974 | 0.377 | 0.288 | 3.25E-09 | 1.4 | CELF1      | 1.309027778 |
| RPS182         | 1.40E-13 | 0.3211685 | 0.688 | 0.63  | 3.37E-09 | 1.4 | RPS18      | 1.092063492 |
| SLC33A11       | 1.41E-13 | 0.1170137 | 0.103 | 0.062 | 3.40E-09 | 1.4 | SLC33A1    | 1.661290323 |
| RPL37A3        | 1.48E-13 | 0.1684879 | 0.975 | 0.975 | 3.56E-09 | 1.4 | RPL37A     | 1           |
| CNDP2          | 1.50E-13 | 0.1171546 | 0.177 | 0.12  | 3.63E-09 | 1.4 | CNDP2      | 1.475       |
| TMEM87A        | 1.73E-13 | 0.1652997 | 0.468 | 0.376 | 4.16E-09 | 1.4 | TMEM87A    | 1.244680851 |
| BRK13          | 1.82E-13 | 0.1374732 | 0.703 | 0.595 | 4.38E-09 | 1.4 | BRK1       | 1.181512605 |
| TRIB21         | 1.92E-13 | 0.105127  | 0.088 | 0.051 | 4.64E-09 | 1.4 | TRIB2      | 1.725490196 |
| PTCHD13        | 2.11E-13 | 0.1082875 | 0.07  | 0.038 | 5.08E-09 | 1.4 | PTCHD1     | 1.842105263 |
| IRAK1BP1       | 2.33E-13 | 0.1370987 | 0.11  | 0.067 | 5.61E-09 | 1.4 | IRAK1BP1   | 1.641791045 |
| RP11-795H16.33 | 2.38E-13 | 0.2056437 | 0.434 | 0.353 | 5.74E-09 | 1.4 | RP11-795H  | 1.229461756 |
| ALDH7A11       | 2.40E-13 | 0.1193394 | 0.124 | 0.078 | 5.78E-09 | 1.4 | ALDH7A1    | 1.58974359  |
| RPS292         | 2.63E-13 | 0.2314914 | 0.961 | 0.92  | 6.33E-09 | 1.4 | RPS29      | 1.044565217 |
| CNIH42         | 3.49E-13 | 0.1324115 | 0.378 | 0.292 | 8.41E-09 | 1.4 | CNIH4      | 1.294520548 |
| SGCD2          | 3.79E-13 | 0.1168191 | 0.073 | 0.04  | 9.13E-09 | 1.4 | SGCD       | 1.825       |
| SLC10A71       | 3.79E-13 | 0.119636  | 0.088 | 0.051 | 9.14E-09 | 1.4 | SLC10A7    | 1.725490196 |
| ZNF720         | 4.07E-13 | 0.1023806 | 0.128 | 0.081 | 9.83E-09 | 1.4 | ZNF720     | 1.580246914 |
| DNHD12         | 4.08E-13 | 0.1176363 | 0.089 | 0.052 | 9.83E-09 | 1.4 | DNHD1      | 1.711538462 |
| NMT11          | 4.12E-13 | 0.1168744 | 0.247 | 0.18  | 9.94E-09 | 1.4 | NMT1       | 1.372222222 |
| SORL11         | 4.22E-13 | 0.1039797 | 0.104 | 0.063 | 1.02E-08 | 1.4 | SORL1      | 1.650793651 |
| RP11-840I19.33 | 4.23E-13 | 0.1208592 | 0.096 | 0.057 | 1.02E-08 | 1.4 | RP11-840I1 | 1.684210526 |
| RAD9A1         | 4.33E-13 | 0.1117816 | 0.155 | 0.103 | 1.05E-08 | 1.4 | RAD9A      | 1.504854369 |
| MAPK1IP1L2     | 4.84E-13 | 0.1030356 | 0.227 | 0.162 | 1.17E-08 | 1.4 | MAPK1IP1I  | 1.401234568 |
| HMG20A         | 4.88E-13 | 0.1002017 | 0.102 | 0.062 | 1.18E-08 | 1.4 | HMG20A     | 1.64516129  |
| SVIL-AS12      | 5.28E-13 | 0.1140632 | 0.15  | 0.099 | 1.27E-08 | 1.4 | SVIL-AS1   | 1.515151515 |
| ATP1A11        | 5.32E-13 | 0.1264567 | 0.612 | 0.493 | 1.28E-08 | 1.4 | ATP1A1     | 1.24137931  |
| USO12          | 5.46E-13 | 0.1343743 | 0.223 | 0.158 | 1.32E-08 | 1.4 | USO1       | 1.411392405 |
| PAPD4          | 5.69E-13 | 0.1258154 | 0.392 | 0.305 | 1.37E-08 | 1.4 | PAPD4      | 1.285245902 |
| CDC14B2        | 5.70E-13 | 0.1086649 | 0.103 | 0.062 | 1.37E-08 | 1.4 | CDC14B     | 1.661290323 |
| PHIP           | 6.38E-13 | 0.1396503 | 0.538 | 0.43  | 1.54E-08 | 1.4 | PHIP       | 1.251162791 |
| IRF2BPL1       | 7.02E-13 | 0.1036118 | 0.222 | 0.157 | 1.69E-08 | 1.4 | IRF2BPL    | 1.414012739 |
| SIPA1L11       | 8.38E-13 | 0.106672  | 0.476 | 0.374 | 2.02E-08 | 1.4 | SIPA1L1    | 1.272727273 |
| MED282         | 8.47E-13 | 0.1138049 | 0.121 | 0.077 | 2.04E-08 | 1.4 | MED28      | 1.571428571 |

|              |          |           |       |       |          |     |           |             |
|--------------|----------|-----------|-------|-------|----------|-----|-----------|-------------|
| ANKRD36B2    | 8.51E-13 | 0.1445238 | 0.113 | 0.071 | 2.05E-08 | 1.4 | ANKRD36B  | 1.591549296 |
| TRIP41       | 9.54E-13 | 0.1162648 | 0.073 | 0.041 | 2.30E-08 | 1.4 | TRIP4     | 1.780487805 |
| UVRAG        | 1.13E-12 | 0.1185252 | 0.563 | 0.454 | 2.73E-08 | 1.4 | UVRAG     | 1.240088106 |
| FKBP5        | 1.31E-12 | 0.1749558 | 0.413 | 0.328 | 3.16E-08 | 1.4 | FKBP5     | 1.259146341 |
| XRRA12       | 1.32E-12 | 0.1069089 | 0.146 | 0.097 | 3.18E-08 | 1.4 | XRRA1     | 1.505154639 |
| WDR45B3      | 1.44E-12 | 0.1284476 | 0.281 | 0.208 | 3.47E-08 | 1.4 | WDR45B    | 1.350961538 |
| CEP70        | 1.44E-12 | 0.1056816 | 0.113 | 0.071 | 3.48E-08 | 1.4 | CEP70     | 1.591549296 |
| OCIAD11      | 1.62E-12 | 0.1051115 | 0.331 | 0.25  | 3.91E-08 | 1.4 | OCIAD1    | 1.324       |
| DCAF101      | 1.63E-12 | 0.1165688 | 0.247 | 0.18  | 3.93E-08 | 1.4 | DCAF10    | 1.372222222 |
| CEP57        | 1.69E-12 | 0.1127291 | 0.141 | 0.093 | 4.08E-08 | 1.4 | CEP57     | 1.516129032 |
| DENND4C      | 1.74E-12 | 0.1292628 | 0.286 | 0.212 | 4.19E-08 | 1.4 | DENND4C   | 1.349056604 |
| WDR411       | 1.91E-12 | 0.1039972 | 0.13  | 0.085 | 4.60E-08 | 1.4 | WDR41     | 1.529411765 |
| FAM179B      | 1.97E-12 | 0.1115544 | 0.126 | 0.081 | 4.74E-08 | 1.4 | FAM179B   | 1.555555556 |
| DEGS12       | 2.06E-12 | 0.1208411 | 0.096 | 0.058 | 4.98E-08 | 1.4 | DEGS1     | 1.655172414 |
| BIRC6-AS22   | 2.07E-12 | 0.1069593 | 0.269 | 0.198 | 5.00E-08 | 1.4 | BIRC6-AS2 | 1.358585859 |
| HEATR4       | 2.15E-12 | 0.1145633 | 0.053 | 0.027 | 5.17E-08 | 1.4 | HEATR4    | 1.962962963 |
| GOLGA8A1     | 2.19E-12 | 0.1200873 | 0.059 | 0.031 | 5.29E-08 | 1.4 | GOLGA8A   | 1.903225806 |
| LINC008941   | 2.26E-12 | 0.1025664 | 0.096 | 0.058 | 5.44E-08 | 1.4 | LINC00894 | 1.655172414 |
| CDC42SE21    | 2.46E-12 | 0.120856  | 0.272 | 0.202 | 5.94E-08 | 1.4 | CDC42SE2  | 1.346534653 |
| LHFPL33      | 2.98E-12 | 0.1027552 | 0.331 | 0.253 | 7.20E-08 | 1.4 | LHFPL3    | 1.308300395 |
| IPMK2        | 3.14E-12 | 0.11628   | 0.132 | 0.087 | 7.58E-08 | 1.4 | IPMK      | 1.517241379 |
| TCAIM1       | 3.40E-12 | 0.1092431 | 0.095 | 0.058 | 8.19E-08 | 1.4 | TCAIM     | 1.637931034 |
| RPS151       | 3.40E-12 | 0.3411496 | 0.192 | 0.138 | 8.20E-08 | 1.4 | RPS15     | 1.391304348 |
| AC015849.191 | 3.45E-12 | 0.1088557 | 0.053 | 0.027 | 8.31E-08 | 1.4 | AC015849. | 1.962962963 |
| FANCC1       | 3.45E-12 | 0.1323935 | 0.178 | 0.124 | 8.31E-08 | 1.4 | FANCC     | 1.435483871 |
| RPAIN3       | 3.87E-12 | 0.1188599 | 0.277 | 0.207 | 9.32E-08 | 1.4 | RPAIN     | 1.338164251 |
| FBXW81       | 4.02E-12 | 0.1024436 | 0.058 | 0.031 | 9.69E-08 | 1.4 | FBXW8     | 1.870967742 |
| CEP631       | 4.06E-12 | 0.1046994 | 0.109 | 0.069 | 9.78E-08 | 1.4 | CEP63     | 1.579710145 |
| PRPSAP13     | 4.13E-12 | 0.1075784 | 0.124 | 0.081 | 9.96E-08 | 1.4 | PRPSAP1   | 1.530864198 |
| OPTN2        | 5.27E-12 | 0.1256607 | 0.211 | 0.152 | 1.27E-07 | 1.4 | OPTN      | 1.388157895 |
| FBXW72       | 5.92E-12 | 0.1527908 | 0.356 | 0.275 | 1.43E-07 | 1.4 | FBXW7     | 1.294545455 |
| RPL282       | 6.78E-12 | 0.4629856 | 0.143 | 0.099 | 1.64E-07 | 1.4 | RPL28     | 1.444444444 |
| B4GALT51     | 7.08E-12 | 0.1322335 | 0.383 | 0.297 | 1.71E-07 | 1.4 | B4GALT5   | 1.28956229  |
| PDK32        | 7.37E-12 | 0.1270926 | 0.291 | 0.222 | 1.78E-07 | 1.4 | PDK3      | 1.310810811 |
| DLG21        | 7.91E-12 | 0.1219384 | 0.22  | 0.158 | 1.91E-07 | 1.4 | DLG2      | 1.392405063 |
| FOS1         | 8.35E-12 | 0.1569015 | 0.291 | 0.225 | 2.01E-07 | 1.4 | FOS       | 1.293333333 |
| CBWD71       | 8.68E-12 | 0.1124158 | 0.102 | 0.064 | 2.09E-07 | 1.4 | CBWD7     | 1.59375     |
| LUC7L1       | 9.15E-12 | 0.1116453 | 0.137 | 0.091 | 2.21E-07 | 1.4 | LUC7L     | 1.505494505 |
| ARMC81       | 9.80E-12 | 0.1246929 | 0.194 | 0.138 | 2.36E-07 | 1.4 | ARMC8     | 1.405797101 |
| LINC-PINT1   | 1.11E-11 | 0.1430625 | 0.678 | 0.563 | 2.67E-07 | 1.4 | LINC-PINT | 1.204262877 |
| ZDHHC132     | 1.14E-11 | 0.1032805 | 0.116 | 0.074 | 2.74E-07 | 1.4 | ZDHHC13   | 1.567567568 |
| ZNF1601      | 1.16E-11 | 0.1039209 | 0.077 | 0.045 | 2.80E-07 | 1.4 | ZNF160    | 1.711111111 |
| MASTL1       | 1.33E-11 | 0.1099191 | 0.083 | 0.049 | 3.21E-07 | 1.4 | MASTL     | 1.693877551 |
| CASP71       | 1.37E-11 | 0.113431  | 0.214 | 0.155 | 3.29E-07 | 1.4 | CASP7     | 1.380645161 |
| SHTN11       | 1.41E-11 | 0.110736  | 0.178 | 0.125 | 3.41E-07 | 1.4 | SHTN1     | 1.424       |
| HDAC72       | 1.51E-11 | 0.13301   | 0.139 | 0.094 | 3.63E-07 | 1.4 | HDAC7     | 1.478723404 |
| TGFA2        | 1.54E-11 | 0.1236394 | 0.103 | 0.065 | 3.72E-07 | 1.4 | TGFA      | 1.584615385 |
| DFNB591      | 1.74E-11 | 0.1893903 | 0.033 | 0.014 | 4.19E-07 | 1.4 | DFNB59    | 2.357142857 |
| DCAF62       | 1.79E-11 | 0.1120888 | 0.516 | 0.419 | 4.31E-07 | 1.4 | DCAF6     | 1.23150358  |
| GSTP12       | 1.85E-11 | 0.10271   | 0.088 | 0.053 | 4.46E-07 | 1.4 | GSTP1     | 1.660377358 |
| IWS1         | 1.93E-11 | 0.1044483 | 0.202 | 0.144 | 4.66E-07 | 1.4 | IWS1      | 1.402777778 |
| ARL17A       | 2.00E-11 | 0.103079  | 0.099 | 0.062 | 4.82E-07 | 1.4 | ARL17A    | 1.596774194 |

|              |          |           |       |       |          |     |           |             |
|--------------|----------|-----------|-------|-------|----------|-----|-----------|-------------|
| NUCKS1       | 2.03E-11 | 0.1213801 | 0.37  | 0.289 | 4.89E-07 | 1.4 | NUCKS1    | 1.280276817 |
| ANXA71       | 2.36E-11 | 0.1056633 | 0.363 | 0.282 | 5.70E-07 | 1.4 | ANXA7     | 1.287234043 |
| RFX31        | 2.63E-11 | 0.1400301 | 0.222 | 0.163 | 6.34E-07 | 1.4 | RFX3      | 1.36196319  |
| CDC42SE11    | 2.91E-11 | 0.1099377 | 0.2   | 0.144 | 7.03E-07 | 1.4 | CDC42SE1  | 1.388888889 |
| BCAP291      | 2.92E-11 | 0.1476924 | 0.202 | 0.146 | 7.05E-07 | 1.4 | BCAP29    | 1.383561644 |
| PRRC2C1      | 2.99E-11 | 0.1383936 | 0.709 | 0.603 | 7.21E-07 | 1.4 | PRRC2C    | 1.175787728 |
| ICA11        | 3.24E-11 | 0.1231739 | 0.337 | 0.262 | 7.80E-07 | 1.4 | ICA1      | 1.286259542 |
| MED27        | 3.24E-11 | 0.1097266 | 0.09  | 0.055 | 7.81E-07 | 1.4 | MED27     | 1.636363636 |
| ALDH1A2      | 3.29E-11 | 0.1379854 | 0.076 | 0.045 | 7.93E-07 | 1.4 | ALDH1A2   | 1.688888889 |
| LIPE-AS11    | 3.64E-11 | 0.1305104 | 0.113 | 0.073 | 8.78E-07 | 1.4 | LIPE-AS1  | 1.547945205 |
| RPL351       | 3.90E-11 | 0.3235244 | 0.335 | 0.27  | 9.40E-07 | 1.4 | RPL35     | 1.240740741 |
| DZANK13      | 4.19E-11 | 0.1200746 | 0.049 | 0.025 | 1.01E-06 | 1.4 | DZANK1    | 1.96        |
| UBR3         | 4.79E-11 | 0.1150367 | 0.255 | 0.189 | 1.16E-06 | 1.4 | UBR3      | 1.349206349 |
| SP100        | 4.89E-11 | 0.1334897 | 0.206 | 0.151 | 1.18E-06 | 1.4 | SP100     | 1.364238411 |
| RP11-1H15.22 | 6.11E-11 | 0.1407225 | 0.108 | 0.07  | 1.47E-06 | 1.4 | RP11-1H15 | 1.542857143 |
| SH3YL13      | 6.15E-11 | 0.1131894 | 0.262 | 0.197 | 1.48E-06 | 1.4 | SH3YL1    | 1.329949239 |
| MFI21        | 6.35E-11 | 0.100583  | 0.038 | 0.018 | 1.53E-06 | 1.4 | MFI2      | 2.111111111 |
| CC2D1A       | 6.40E-11 | 0.1010698 | 0.064 | 0.036 | 1.54E-06 | 1.4 | CC2D1A    | 1.777777778 |
| AAMDC        | 6.49E-11 | 0.1355724 | 0.218 | 0.161 | 1.56E-06 | 1.4 | AAMDC     | 1.354037267 |
| RAB131       | 6.98E-11 | 0.1002491 | 0.192 | 0.138 | 1.68E-06 | 1.4 | RAB13     | 1.391304348 |
| IFT43        | 7.28E-11 | 0.1126875 | 0.134 | 0.09  | 1.76E-06 | 1.4 | IFT43     | 1.488888889 |
| ANKRD101     | 7.29E-11 | 0.1310752 | 0.569 | 0.477 | 1.76E-06 | 1.4 | ANKRD10   | 1.192872117 |
| NFIC1        | 7.44E-11 | 0.1252006 | 0.242 | 0.18  | 1.79E-06 | 1.4 | NFIC      | 1.344444444 |
| EFCAB2       | 8.04E-11 | 0.1061424 | 0.071 | 0.041 | 1.94E-06 | 1.4 | EFCAB2    | 1.731707317 |
| ZNF385D1     | 9.29E-11 | 0.1174124 | 0.072 | 0.042 | 2.24E-06 | 1.4 | ZNF385D   | 1.714285714 |
| TRAPPC91     | 9.47E-11 | 0.1251878 | 0.268 | 0.201 | 2.28E-06 | 1.4 | TRAPPC9   | 1.333333333 |
| DAP2         | 9.80E-11 | 0.1034102 | 0.09  | 0.056 | 2.36E-06 | 1.4 | DAP       | 1.607142857 |
| BMPR2        | 1.08E-10 | 0.1200673 | 0.334 | 0.261 | 2.62E-06 | 1.4 | BMPR2     | 1.279693487 |
| TRAP12       | 1.49E-10 | 0.1012822 | 0.059 | 0.033 | 3.60E-06 | 1.4 | TRAP1     | 1.787878788 |
| EEF1D1       | 1.72E-10 | 0.16312   | 0.143 | 0.1   | 4.15E-06 | 1.4 | EEF1D     | 1.43        |
| PRPF3        | 1.75E-10 | 0.122434  | 0.177 | 0.127 | 4.22E-06 | 1.4 | PRPF3     | 1.393700787 |
| ZNF3263      | 1.77E-10 | 0.109484  | 0.191 | 0.138 | 4.28E-06 | 1.4 | ZNF326    | 1.384057971 |
| RHBDD1       | 1.80E-10 | 0.1040438 | 0.188 | 0.135 | 4.34E-06 | 1.4 | RHBDD1    | 1.392592593 |
| PCLO         | 1.85E-10 | 0.1400362 | 0.08  | 0.048 | 4.47E-06 | 1.4 | PCLO      | 1.666666667 |
| CAMKMT1      | 1.85E-10 | 0.1388178 | 0.225 | 0.167 | 4.47E-06 | 1.4 | CAMKMT    | 1.347305389 |
| FKBP15       | 2.25E-10 | 0.1014246 | 0.088 | 0.055 | 5.43E-06 | 1.4 | FKBP15    | 1.6         |
| GCAT1        | 2.91E-10 | 0.1097511 | 0.058 | 0.032 | 7.02E-06 | 1.4 | GCAT      | 1.8125      |
| RPS141       | 3.26E-10 | 0.2585872 | 0.481 | 0.403 | 7.86E-06 | 1.4 | RPS14     | 1.193548387 |
| SMARCA12     | 3.33E-10 | 0.1044294 | 0.151 | 0.106 | 8.03E-06 | 1.4 | SMARCA1   | 1.424528302 |
| ZNF76        | 4.02E-10 | 0.1088898 | 0.052 | 0.029 | 9.69E-06 | 1.4 | ZNF76     | 1.793103448 |
| RP11-91P24.7 | 5.04E-10 | 0.104371  | 0.07  | 0.042 | 1.22E-05 | 1.4 | RP11-91P2 | 1.666666667 |
| NIN1         | 5.55E-10 | 0.1134735 | 0.144 | 0.099 | 1.34E-05 | 1.4 | NIN       | 1.454545455 |
| RP4-605O3.41 | 7.03E-10 | 0.1360122 | 0.124 | 0.085 | 1.70E-05 | 1.4 | RP4-605O3 | 1.458823529 |
| OPA11        | 7.98E-10 | 0.1255767 | 0.144 | 0.101 | 1.92E-05 | 1.4 | OPA1      | 1.425742574 |
| MT-ND4L3     | 8.80E-10 | 0.1008452 | 0.534 | 0.444 | 2.12E-05 | 1.4 | MT-ND4L   | 1.202702703 |
| PPP2R5A1     | 1.02E-09 | 0.1038286 | 0.209 | 0.155 | 2.46E-05 | 1.4 | PPP2R5A   | 1.348387097 |
| CABIN11      | 1.32E-09 | 0.1146921 | 0.104 | 0.068 | 3.17E-05 | 1.4 | CABIN1    | 1.529411765 |
| BCL6         | 1.58E-09 | 0.1882375 | 0.427 | 0.35  | 3.80E-05 | 1.4 | BCL6      | 1.22        |
| METTTL161    | 1.89E-09 | 0.1202266 | 0.229 | 0.173 | 4.55E-05 | 1.4 | METTTL16  | 1.323699422 |
| SFI11        | 2.01E-09 | 0.1040146 | 0.082 | 0.052 | 4.84E-05 | 1.4 | SFI1      | 1.576923077 |
| CXCL101      | 2.03E-09 | 0.215318  | 0.013 | 0.004 | 4.90E-05 | 1.4 | CXCL10    | 3.25        |
| AC004231.22  | 2.04E-09 | 0.1071878 | 0.059 | 0.034 | 4.91E-05 | 1.4 | AC004231  | 1.735294118 |

|              |           |           |       |       |             |     |           |             |
|--------------|-----------|-----------|-------|-------|-------------|-----|-----------|-------------|
| ZSWIM71      | 2.58E-09  | 0.1216462 | 0.1   | 0.066 | 6.23E-05    | 1.4 | ZSWIM7    | 1.515151515 |
| RP11-479O9.4 | 2.69E-09  | 0.1027905 | 0.088 | 0.056 | 6.49E-05    | 1.4 | RP11-479O | 1.571428571 |
| EYA31        | 2.69E-09  | 0.1018456 | 0.132 | 0.091 | 6.49E-05    | 1.4 | EYA3      | 1.450549451 |
| LTBP12       | 3.16E-09  | 0.1175321 | 0.253 | 0.195 | 7.61E-05    | 1.4 | LTBP1     | 1.297435897 |
| CNN21        | 3.64E-09  | 0.1094931 | 0.043 | 0.023 | 8.78E-05    | 1.4 | CNN2      | 1.869565217 |
| CEP192       | 4.22E-09  | 0.1291606 | 0.154 | 0.111 | 0.000101814 | 1.4 | CEP192    | 1.387387387 |
| TAPBP        | 4.26E-09  | 0.1173557 | 0.188 | 0.139 | 0.000102702 | 1.4 | TAPBP     | 1.352517986 |
| LDLR1        | 4.71E-09  | 0.1069106 | 0.22  | 0.165 | 0.000113658 | 1.4 | LDLR      | 1.333333333 |
| KCNQ1OT11    | 4.98E-09  | 0.1047063 | 0.121 | 0.083 | 0.000120075 | 1.4 | KCNQ1OT1  | 1.457831325 |
| MTX2         | 4.99E-09  | 0.1013803 | 0.118 | 0.081 | 0.000120249 | 1.4 | MTX2      | 1.456790123 |
| DDX17        | 5.52E-09  | 0.1346078 | 0.508 | 0.417 | 0.000133198 | 1.4 | DDX17     | 1.21822542  |
| ZBTB7C1      | 5.69E-09  | 0.1031668 | 0.064 | 0.039 | 0.000137242 | 1.4 | ZBTB7C    | 1.641025641 |
| DPP101       | 6.37E-09  | 0.1170995 | 0.076 | 0.048 | 0.00015358  | 1.4 | DPP10     | 1.583333333 |
| SCFD11       | 6.55E-09  | 0.1074494 | 0.27  | 0.21  | 0.000157828 | 1.4 | SCFD1     | 1.285714286 |
| MED13L       | 6.66E-09  | 0.1699724 | 0.763 | 0.68  | 0.00016069  | 1.4 | MED13L    | 1.122058824 |
| MYO3B3       | 8.38E-09  | 0.1766887 | 0.191 | 0.147 | 0.000202161 | 1.4 | MYO3B     | 1.299319728 |
| PLA2G162     | 9.98E-09  | 0.1240538 | 0.127 | 0.09  | 0.000240709 | 1.4 | PLA2G16   | 1.411111111 |
| RPL81        | 1.22E-08  | 0.3102754 | 0.206 | 0.159 | 0.000295136 | 1.4 | RPL8      | 1.295597484 |
| LRRC28       | 1.44E-08  | 0.1186028 | 0.102 | 0.069 | 0.000346629 | 1.4 | LRRC28    | 1.47826087  |
| MLLT101      | 1.47E-08  | 0.1003619 | 0.203 | 0.153 | 0.000354369 | 1.4 | MLLT10    | 1.326797386 |
| UTRN         | 1.56E-08  | 0.1273311 | 0.342 | 0.272 | 0.000377098 | 1.4 | UTRN      | 1.257352941 |
| ZNF1481      | 1.74E-08  | 0.1157465 | 0.342 | 0.273 | 0.000420372 | 1.4 | ZNF148    | 1.252747253 |
| C2Oorf203    | 2.23E-08  | 0.1046941 | 0.022 | 0.01  | 0.000537443 | 1.4 | C2Oorf203 | 2.2         |
| PREPL2       | 2.55E-08  | 0.1210951 | 0.141 | 0.102 | 0.000615553 | 1.4 | PREPL     | 1.382352941 |
| FBXL17       | 2.59E-08  | 0.1063582 | 0.327 | 0.26  | 0.000625317 | 1.4 | FBXL17    | 1.257692308 |
| HIPK31       | 3.53E-08  | 0.108575  | 0.241 | 0.187 | 0.000852359 | 1.4 | HIPK3     | 1.288770053 |
| CLIP22       | 5.66E-08  | 0.1340353 | 0.171 | 0.129 | 0.001365252 | 1.4 | CLIP2     | 1.325581395 |
| NFATC31      | 8.30E-08  | 0.1007484 | 0.217 | 0.166 | 0.002001002 | 1.4 | NFATC3    | 1.307228916 |
| PCNXL23      | 1.44E-07  | 0.2785627 | 0.811 | 0.758 | 0.003466586 | 1.4 | PCNXL2    | 1.069920844 |
| MLLT6        | 1.80E-07  | 0.1115197 | 0.121 | 0.087 | 0.004330937 | 1.4 | MLLT6     | 1.390804598 |
| GEMIN51      | 3.47E-07  | 0.1112797 | 0.032 | 0.017 | 0.008364771 | 1.4 | GEMIN5    | 1.882352941 |
| KIAA1033     | 3.59E-07  | 0.1110047 | 0.139 | 0.103 | 0.008648993 | 1.4 | KIAA1033  | 1.349514563 |
| ZDHHC20      | 3.78E-07  | 0.1013345 | 0.22  | 0.173 | 0.009112746 | 1.4 | ZDHHC20   | 1.271676301 |
| LIFR         | 5.26E-07  | 0.1081005 | 0.19  | 0.148 | 0.01268262  | 1.4 | LIFR      | 1.283783784 |
| FAU1         | 5.93E-07  | 0.1937843 | 0.231 | 0.186 | 0.01430876  | 1.4 | FAU       | 1.241935484 |
| RAB11FIP31   | 7.67E-07  | 0.133574  | 0.107 | 0.077 | 0.01849001  | 1.4 | RAB11FIP3 | 1.38961039  |
| B4GALT1      | 9.89E-07  | 0.1084049 | 0.506 | 0.433 | 0.02383706  | 1.4 | B4GALT1   | 1.168591224 |
| H3F3B        | 1.27E-06  | 0.1321039 | 0.456 | 0.387 | 0.03072829  | 1.4 | H3F3B     | 1.178294574 |
| MAST4        | 1.29E-06  | 0.1167305 | 0.595 | 0.521 | 0.03105796  | 1.4 | MAST4     | 1.142034549 |
| CD24         | 1.67E-06  | 0.1235739 | 0.641 | 0.573 | 0.04021768  | 1.4 | CD24      | 1.118673647 |
| RPLP21       | 1.75E-06  | 0.2976366 | 0.266 | 0.221 | 0.04210245  | 1.4 | RPLP2     | 1.20361991  |
| RP1-78O14.1  | 0         | 1.633987  | 0.515 | 0.173 | 0           | 2.1 | RP1-78O14 | 2.976878613 |
| NR6A1        | 0         | 1.532101  | 0.676 | 0.319 | 0           | 2.1 | NR6A1     | 2.119122257 |
| MYO61        | 0         | 1.270477  | 0.928 | 0.743 | 0           | 2.1 | MYO6      | 1.248990579 |
| RICTOR1      | 0         | 1.245223  | 0.859 | 0.599 | 0           | 2.1 | RICTOR    | 1.434056761 |
| ANKRD30A     | 0         | 1.042348  | 0.881 | 0.431 | 0           | 2.1 | ANKRD30A  | 2.044083527 |
| AREG         | 1.64E-303 | 1.217541  | 0.791 | 0.417 | 3.94E-299   | 2.1 | AREG      | 1.896882494 |
| DTNA1        | 1.07E-294 | 1.187511  | 0.919 | 0.742 | 2.57E-290   | 2.1 | DTNA      | 1.238544474 |
| TMEM2        | 4.86E-287 | 1.363091  | 0.65  | 0.317 | 1.17E-282   | 2.1 | TMEM2     | 2.050473186 |
| DNAJC12      | 1.47E-274 | 1.099486  | 0.727 | 0.357 | 3.54E-270   | 2.1 | DNAJC12   | 2.036414566 |
| TRIO2        | 1.23E-256 | 0.9813895 | 0.946 | 0.796 | 2.97E-252   | 2.1 | TRIO      | 1.188442211 |
| MACF1        | 2.08E-250 | 1.08192   | 0.872 | 0.706 | 5.01E-246   | 2.1 | MACF1     | 1.235127479 |

|               |           |           |       |       |           |     |            |             |
|---------------|-----------|-----------|-------|-------|-----------|-----|------------|-------------|
| TSC22D21      | 9.61E-242 | 1.47351   | 0.722 | 0.442 | 2.32E-237 | 2.1 | TSC22D2    | 1.633484163 |
| HSPA51        | 9.40E-236 | 1.391482  | 0.715 | 0.424 | 2.27E-231 | 2.1 | HSPA5      | 1.686320755 |
| AR            | 3.85E-231 | 1.119676  | 0.402 | 0.136 | 9.29E-227 | 2.1 | AR         | 2.955882353 |
| UBN2          | 4.15E-229 | 1.078308  | 0.543 | 0.247 | 1.00E-224 | 2.1 | UBN2       | 2.198380567 |
| GNAS          | 1.58E-222 | 0.8722538 | 0.902 | 0.738 | 3.80E-218 | 2.1 | GNAS       | 1.222222222 |
| RP11-554F20.1 | 4.84E-220 | 0.9549696 | 0.207 | 0.039 | 1.17E-215 | 2.1 | RP11-554F  | 5.307692308 |
| CHD2          | 3.02E-218 | 1.074213  | 0.771 | 0.526 | 7.29E-214 | 2.1 | CHD2       | 1.465779468 |
| ZFAND3        | 1.98E-214 | 0.8375056 | 0.907 | 0.746 | 4.79E-210 | 2.1 | ZFAND3     | 1.215817694 |
| CXCL13        | 2.98E-212 | 1.120639  | 0.718 | 0.381 | 7.19E-208 | 2.1 | CXCL13     | 1.884514436 |
| TSPAN5        | 1.43E-211 | 1.113683  | 0.587 | 0.281 | 3.46E-207 | 2.1 | TSPAN5     | 2.088967972 |
| RPS6KA3       | 2.57E-209 | 1.145938  | 0.703 | 0.441 | 6.21E-205 | 2.1 | RPS6KA3    | 1.594104308 |
| ATXN1         | 2.65E-208 | 1.17818   | 0.734 | 0.494 | 6.40E-204 | 2.1 | ATXN1      | 1.48582996  |
| PPP2R2A1      | 8.86E-204 | 1.086807  | 0.733 | 0.511 | 2.14E-199 | 2.1 | PPP2R2A    | 1.43444227  |
| LRBA          | 2.49E-201 | 1.180629  | 0.808 | 0.622 | 6.01E-197 | 2.1 | LRBA       | 1.29903537  |
| EREG          | 2.27E-195 | 1.007322  | 0.533 | 0.234 | 5.46E-191 | 2.1 | EREG       | 2.277777778 |
| ALCAM         | 1.22E-194 | 0.8236185 | 0.788 | 0.485 | 2.94E-190 | 2.1 | ALCAM      | 1.624742268 |
| BCL2          | 2.46E-189 | 1.293647  | 0.519 | 0.249 | 5.94E-185 | 2.1 | BCL2       | 2.084337349 |
| UGDH          | 1.89E-188 | 0.96437   | 0.486 | 0.212 | 4.56E-184 | 2.1 | UGDH       | 2.29245283  |
| OTUD7B        | 9.51E-186 | 0.9960397 | 0.542 | 0.27  | 2.29E-181 | 2.1 | OTUD7B     | 2.007407407 |
| CACNB4        | 4.84E-185 | 1.095167  | 0.315 | 0.1   | 1.17E-180 | 2.1 | CACNB4     | 3.15        |
| ZNF644        | 4.61E-181 | 1.177627  | 0.682 | 0.45  | 1.11E-176 | 2.1 | ZNF644     | 1.515555556 |
| RAB11FIP1     | 4.43E-180 | 0.7156369 | 0.918 | 0.715 | 1.07E-175 | 2.1 | RAB11FIP1  | 1.283916084 |
| RASEF         | 8.03E-179 | 0.9767797 | 0.513 | 0.249 | 1.94E-174 | 2.1 | RASEF      | 2.060240964 |
| THRB          | 7.90E-177 | 1.086204  | 0.686 | 0.438 | 1.90E-172 | 2.1 | THRB       | 1.566210046 |
| MALAT1        | 1.12E-176 | 0.4626054 | 0.999 | 1     | 2.69E-172 | 2.1 | MALAT1     | 0.999       |
| ANKRD12       | 4.98E-171 | 0.9104013 | 0.816 | 0.659 | 1.20E-166 | 2.1 | ANKRD12    | 1.238239757 |
| ERBB4         | 1.29E-167 | 0.8464465 | 0.769 | 0.465 | 3.11E-163 | 2.1 | ERBB4      | 1.653763441 |
| AKAP13        | 1.45E-165 | 0.9341448 | 0.775 | 0.595 | 3.49E-161 | 2.1 | AKAP13     | 1.302521008 |
| ERBB2IP       | 5.07E-164 | 0.981188  | 0.643 | 0.407 | 1.22E-159 | 2.1 | ERBB2IP    | 1.57985258  |
| HIVEP2        | 3.95E-159 | 1.071925  | 0.657 | 0.43  | 9.52E-155 | 2.1 | HIVEP2     | 1.527906977 |
| ARHGAP291     | 8.86E-159 | 0.8810927 | 0.771 | 0.554 | 2.14E-154 | 2.1 | ARHGAP29   | 1.391696751 |
| ANO6          | 2.08E-157 | 0.8878721 | 0.717 | 0.5   | 5.01E-153 | 2.1 | ANO6       | 1.434       |
| DENND4A       | 5.25E-154 | 0.9566139 | 0.76  | 0.578 | 1.27E-149 | 2.1 | DENND4A    | 1.314878893 |
| BTRC          | 2.73E-149 | 0.9494723 | 0.478 | 0.243 | 6.58E-145 | 2.1 | BTRC       | 1.967078189 |
| EFHD1         | 3.50E-149 | 0.9071621 | 0.531 | 0.278 | 8.44E-145 | 2.1 | EFHD1      | 1.910071942 |
| GSTM3         | 5.74E-149 | 0.8424408 | 0.559 | 0.305 | 1.38E-144 | 2.1 | GSTM3      | 1.832786885 |
| LARP1B        | 9.01E-149 | 1.018972  | 0.421 | 0.198 | 2.17E-144 | 2.1 | LARP1B     | 2.126262626 |
| COX6C         | 1.65E-147 | 0.8208295 | 0.853 | 0.754 | 3.98E-143 | 2.1 | COX6C      | 1.131299735 |
| KCNMA1        | 8.40E-145 | 1.312373  | 0.331 | 0.131 | 2.03E-140 | 2.1 | KCNMA1     | 2.526717557 |
| SYTL2         | 4.25E-143 | 0.7844581 | 0.704 | 0.427 | 1.03E-138 | 2.1 | SYTL2      | 1.648711944 |
| AF127936.9    | 5.07E-143 | 0.8065297 | 0.331 | 0.128 | 1.22E-138 | 2.1 | AF127936.9 | 2.5859375   |
| HILPDA1       | 1.62E-142 | 1.745543  | 0.484 | 0.258 | 3.92E-138 | 2.1 | HILPDA     | 1.875968992 |
| AGR2          | 3.80E-141 | 0.8947078 | 0.472 | 0.222 | 9.17E-137 | 2.1 | AGR2       | 2.126126126 |
| C8orf4        | 4.30E-139 | 0.854627  | 0.779 | 0.494 | 1.04E-134 | 2.1 | C8orf4     | 1.576923077 |
| ADAM32        | 7.63E-139 | 1.008864  | 0.431 | 0.21  | 1.84E-134 | 2.1 | ADAM32     | 2.052380952 |
| YTHDC11       | 1.05E-138 | 0.8715612 | 0.586 | 0.365 | 2.52E-134 | 2.1 | YTHDC1     | 1.605479452 |
| TJP1          | 2.21E-137 | 0.8697263 | 0.685 | 0.49  | 5.33E-133 | 2.1 | TJP1       | 1.397959184 |
| PHLDB2        | 2.69E-133 | 0.8735323 | 0.622 | 0.4   | 6.49E-129 | 2.1 | PHLDB2     | 1.555       |
| ARPP19        | 6.90E-132 | 0.8630079 | 0.616 | 0.412 | 1.66E-127 | 2.1 | ARPP19     | 1.495145631 |
| MYBPC1        | 9.59E-132 | 0.6541068 | 0.452 | 0.211 | 2.31E-127 | 2.1 | MYBPC1     | 2.142180095 |
| NIPBL         | 1.24E-131 | 0.8557192 | 0.707 | 0.533 | 2.98E-127 | 2.1 | NIPBL      | 1.326454034 |
| MYO5B2        | 4.80E-129 | 0.7564272 | 0.773 | 0.586 | 1.16E-124 | 2.1 | MYO5B      | 1.319112628 |

|             |           |           |       |       |           |     |             |             |
|-------------|-----------|-----------|-------|-------|-----------|-----|-------------|-------------|
| HERC4       | 3.66E-128 | 0.8538589 | 0.696 | 0.511 | 8.83E-124 | 2.1 | HERC4       | 1.362035225 |
| PEAK1       | 1.13E-127 | 1.086993  | 0.464 | 0.248 | 2.72E-123 | 2.1 | PEAK1       | 1.870967742 |
| NEBL        | 1.36E-127 | 0.8347055 | 0.805 | 0.65  | 3.28E-123 | 2.1 | NEBL        | 1.238461538 |
| RERE        | 2.48E-127 | 0.8559016 | 0.719 | 0.556 | 5.99E-123 | 2.1 | RERE        | 1.293165468 |
| SH3BGRL     | 4.48E-127 | 0.8110121 | 0.599 | 0.383 | 1.08E-122 | 2.1 | SH3BGRL     | 1.563968668 |
| MLLT4       | 1.19E-126 | 0.6964746 | 0.789 | 0.63  | 2.87E-122 | 2.1 | MLLT4       | 1.252380952 |
| RALGPS2     | 1.36E-126 | 0.9384819 | 0.497 | 0.276 | 3.28E-122 | 2.1 | RALGPS2     | 1.800724638 |
| KTN1        | 5.22E-125 | 0.7622852 | 0.709 | 0.527 | 1.26E-120 | 2.1 | KTN1        | 1.345351044 |
| C1orf21     | 1.06E-124 | 0.953538  | 0.509 | 0.295 | 2.55E-120 | 2.1 | C1orf21     | 1.725423729 |
| USP47       | 1.10E-123 | 0.8840325 | 0.604 | 0.404 | 2.65E-119 | 2.1 | USP47       | 1.495049505 |
| LMO7        | 2.10E-116 | 0.966531  | 0.362 | 0.168 | 5.07E-112 | 2.1 | LMO7        | 2.154761905 |
| C3orf52     | 6.55E-116 | 0.7478776 | 0.332 | 0.145 | 1.58E-111 | 2.1 | C3orf52     | 2.289655172 |
| LRRFIP2     | 1.71E-115 | 0.5499177 | 0.877 | 0.751 | 4.12E-111 | 2.1 | LRRFIP2     | 1.167776298 |
| RP11-60I3.4 | 3.02E-112 | 0.4141649 | 0.101 | 0.017 | 7.28E-108 | 2.1 | RP11-60I3.4 | 5.941176471 |
| GPBP1       | 3.08E-110 | 0.6382426 | 0.806 | 0.677 | 7.42E-106 | 2.1 | GPBP1       | 1.190546529 |
| ITGAV       | 3.82E-110 | 0.7390965 | 0.592 | 0.381 | 9.21E-106 | 2.1 | ITGAV       | 1.553805774 |
| KIF13A      | 7.13E-110 | 0.9765775 | 0.566 | 0.379 | 1.72E-105 | 2.1 | KIF13A      | 1.493403694 |
| UBE2H1      | 1.33E-109 | 0.6385906 | 0.842 | 0.748 | 3.20E-105 | 2.1 | UBE2H1      | 1.125668449 |
| PAN3        | 2.64E-108 | 0.7030421 | 0.762 | 0.627 | 6.36E-104 | 2.1 | PAN3        | 1.215311005 |
| SPOPL       | 4.04E-108 | 0.7912097 | 0.441 | 0.243 | 9.75E-104 | 2.1 | SPOPL       | 1.814814815 |
| ARHGEF12    | 5.75E-106 | 0.729039  | 0.722 | 0.564 | 1.39E-101 | 2.1 | ARHGEF12    | 1.280141844 |
| CPEB2       | 1.40E-105 | 0.6356832 | 0.521 | 0.289 | 3.37E-101 | 2.1 | CPEB2       | 1.802768166 |
| NRIP1       | 6.13E-105 | 0.8177522 | 0.451 | 0.251 | 1.48E-100 | 2.1 | NRIP1       | 1.796812749 |
| IBTK        | 8.93E-104 | 0.9518375 | 0.386 | 0.206 | 2.15E-99  | 2.1 | IBTK        | 1.873786408 |
| INPP4B      | 2.89E-102 | 0.8459877 | 0.527 | 0.31  | 6.97E-98  | 2.1 | INPP4B      | 1.7         |
| MYL12B      | 4.85E-102 | 0.5617299 | 0.906 | 0.812 | 1.17E-97  | 2.1 | MYL12B      | 1.115763547 |
| PPP6R3      | 2.17E-101 | 0.7156229 | 0.655 | 0.494 | 5.22E-97  | 2.1 | PPP6R3      | 1.325910931 |
| DUSP5       | 1.09E-99  | 0.9530936 | 0.406 | 0.222 | 2.62E-95  | 2.1 | DUSP5       | 1.828828829 |
| NAA25       | 4.14E-99  | 0.9178902 | 0.516 | 0.335 | 9.99E-95  | 2.1 | NAA25       | 1.540298507 |
| MBNL2       | 5.73E-99  | 0.6940312 | 0.69  | 0.529 | 1.38E-94  | 2.1 | MBNL2       | 1.304347826 |
| TBC1D9      | 4.14E-98  | 0.6893746 | 0.628 | 0.432 | 9.97E-94  | 2.1 | TBC1D9      | 1.453703704 |
| FAM160A12   | 1.51E-97  | 0.83561   | 0.753 | 0.64  | 3.64E-93  | 2.1 | FAM160A1    | 1.1765625   |
| HSP90B11    | 8.28E-95  | 0.8982709 | 0.651 | 0.494 | 2.00E-90  | 2.1 | HSP90B1     | 1.317813765 |
| KLRD1       | 1.01E-94  | 0.765224  | 0.317 | 0.148 | 2.43E-90  | 2.1 | KLRD1       | 2.141891892 |
| MYO1B       | 7.13E-94  | 0.7926185 | 0.606 | 0.433 | 1.72E-89  | 2.1 | MYO1B       | 1.399538106 |
| RAB11A1     | 7.55E-93  | 0.7094898 | 0.745 | 0.632 | 1.82E-88  | 2.1 | RAB11A      | 1.178797468 |
| ZNRF2       | 5.19E-92  | 0.8713301 | 0.426 | 0.247 | 1.25E-87  | 2.1 | ZNRF2       | 1.724696356 |
| CASC15      | 1.09E-91  | 1.159016  | 0.656 | 0.51  | 2.64E-87  | 2.1 | CASC15      | 1.28627451  |
| STAT5B      | 2.19E-91  | 0.7557397 | 0.497 | 0.317 | 5.29E-87  | 2.1 | STAT5B      | 1.567823344 |
| CAMTA1      | 4.44E-91  | 0.6131416 | 0.716 | 0.569 | 1.07E-86  | 2.1 | CAMTA1      | 1.258347979 |
| SLC39A6     | 1.80E-90  | 0.616514  | 0.481 | 0.286 | 4.34E-86  | 2.1 | SLC39A6     | 1.681818182 |
| SMCHD1      | 4.88E-89  | 0.7212333 | 0.562 | 0.393 | 1.18E-84  | 2.1 | SMCHD1      | 1.430025445 |
| BHLHE40     | 1.93E-88  | 0.7205815 | 0.342 | 0.173 | 4.64E-84  | 2.1 | BHLHE40     | 1.976878613 |
| STAT5A      | 9.47E-88  | 0.7859557 | 0.33  | 0.166 | 2.28E-83  | 2.1 | STAT5A      | 1.987951807 |
| RAP1B       | 1.49E-86  | 0.7034014 | 0.61  | 0.462 | 3.60E-82  | 2.1 | RAP1B       | 1.32034632  |
| ACRC        | 2.09E-86  | 0.6157249 | 0.225 | 0.089 | 5.03E-82  | 2.1 | ACRC        | 2.528089888 |
| BNIP3L      | 8.49E-86  | 0.7879776 | 0.565 | 0.406 | 2.05E-81  | 2.1 | BNIP3L      | 1.391625616 |
| TFPI        | 3.96E-85  | 0.5617088 | 0.525 | 0.307 | 9.55E-81  | 2.1 | TFPI        | 1.71009772  |
| MAP7D2      | 6.34E-85  | 0.4707505 | 0.138 | 0.039 | 1.53E-80  | 2.1 | MAP7D2      | 3.538461538 |
| ELF1        | 1.32E-84  | 0.5999854 | 0.672 | 0.515 | 3.17E-80  | 2.1 | ELF1        | 1.304854369 |
| CBLB        | 2.75E-83  | 0.8454796 | 0.474 | 0.307 | 6.63E-79  | 2.1 | CBLB        | 1.543973941 |
| LRRFIP1     | 2.86E-83  | 0.5823101 | 0.748 | 0.619 | 6.89E-79  | 2.1 | LRRFIP1     | 1.208400646 |



|              |          |           |       |       |          |     |           |             |
|--------------|----------|-----------|-------|-------|----------|-----|-----------|-------------|
| PTK2         | 5.62E-83 | 0.5872544 | 0.748 | 0.632 | 1.35E-78 | 2.1 | PTK2      | 1.183544304 |
| MAN2A1       | 3.04E-82 | 0.7891257 | 0.47  | 0.306 | 7.33E-78 | 2.1 | MAN2A1    | 1.535947712 |
| GSPT1        | 8.58E-82 | 0.6618585 | 0.52  | 0.354 | 2.07E-77 | 2.1 | GSPT1     | 1.468926554 |
| FNBP11       | 9.95E-82 | 0.6559605 | 0.661 | 0.514 | 2.40E-77 | 2.1 | FNBP1     | 1.285992218 |
| CTD-2587M2.1 | 1.63E-80 | 0.3690968 | 0.096 | 0.021 | 3.94E-76 | 2.1 | CTD-2587M | 4.571428571 |
| SLC2A11      | 2.47E-80 | 0.651313  | 0.194 | 0.072 | 5.95E-76 | 2.1 | SLC2A1    | 2.694444444 |
| SETD51       | 7.00E-80 | 0.6261876 | 0.647 | 0.516 | 1.69E-75 | 2.1 | SETD5     | 1.253875969 |
| ARID4B       | 1.04E-79 | 0.6635503 | 0.669 | 0.546 | 2.50E-75 | 2.1 | ARID4B    | 1.225274725 |
| ECT2         | 7.02E-79 | 0.6843206 | 0.353 | 0.192 | 1.69E-74 | 2.1 | ECT2      | 1.838541667 |
| SDC2         | 2.96E-78 | 0.517653  | 0.188 | 0.069 | 7.14E-74 | 2.1 | SDC2      | 2.724637681 |
| SEMA3C       | 4.01E-78 | 0.7810585 | 0.439 | 0.265 | 9.68E-74 | 2.1 | SEMA3C    | 1.656603774 |
| MIR181A2HG   | 1.51E-77 | 0.5493096 | 0.195 | 0.075 | 3.63E-73 | 2.1 | MIR181A2I | 2.6         |
| FUT8         | 2.72E-77 | 0.7963676 | 0.414 | 0.246 | 6.56E-73 | 2.1 | FUT8      | 1.682926829 |
| TOP1         | 3.44E-77 | 0.6842827 | 0.585 | 0.433 | 8.30E-73 | 2.1 | TOP1      | 1.351039261 |
| PDZD8        | 4.25E-77 | 0.6698664 | 0.381 | 0.217 | 1.02E-72 | 2.1 | PDZD8     | 1.755760369 |
| TOM1L2       | 5.93E-77 | 0.7043624 | 0.45  | 0.287 | 1.43E-72 | 2.1 | TOM1L2    | 1.567944251 |
| SMG1         | 1.94E-76 | 0.6818788 | 0.476 | 0.314 | 4.69E-72 | 2.1 | SMG1      | 1.515923567 |
| WASL         | 2.14E-76 | 0.6840735 | 0.377 | 0.217 | 5.17E-72 | 2.1 | WASL      | 1.737327189 |
| SMIM14       | 2.93E-75 | 0.5793547 | 0.562 | 0.384 | 7.06E-71 | 2.1 | SMIM14    | 1.463541667 |
| EFNA1        | 3.01E-74 | 0.7322566 | 0.386 | 0.225 | 7.25E-70 | 2.1 | EFNA1     | 1.715555556 |
| UGCG         | 5.22E-74 | 0.6114742 | 0.632 | 0.476 | 1.26E-69 | 2.1 | UGCG      | 1.327731092 |
| LAMA3        | 2.40E-73 | 0.7472879 | 0.334 | 0.181 | 5.79E-69 | 2.1 | LAMA3     | 1.845303867 |
| FASN         | 2.45E-73 | 0.4138622 | 0.138 | 0.043 | 5.90E-69 | 2.1 | FASN      | 3.209302326 |
| MORF4L22     | 5.03E-73 | 0.590254  | 0.791 | 0.737 | 1.21E-68 | 2.1 | MORF4L2   | 1.073270014 |
| LRRC1        | 1.20E-72 | 0.6823404 | 0.274 | 0.133 | 2.90E-68 | 2.1 | LRRC1     | 2.060150376 |
| DGKD         | 3.05E-72 | 0.6007243 | 0.247 | 0.113 | 7.36E-68 | 2.1 | DGKD      | 2.185840708 |
| WDR49        | 3.81E-72 | 0.4013896 | 0.102 | 0.026 | 9.18E-68 | 2.1 | WDR49     | 3.923076923 |
| USP9X        | 8.11E-72 | 0.635577  | 0.541 | 0.393 | 1.96E-67 | 2.1 | USP9X     | 1.376590331 |
| CNOT4        | 5.00E-71 | 0.6581222 | 0.533 | 0.388 | 1.20E-66 | 2.1 | CNOT4     | 1.37371134  |
| ACADSB       | 1.65E-69 | 0.6158905 | 0.346 | 0.19  | 3.98E-65 | 2.1 | ACADSB    | 1.821052632 |
| HPX          | 1.04E-68 | 0.6346567 | 0.368 | 0.201 | 2.52E-64 | 2.1 | HPX       | 1.830845771 |
| FRYL         | 2.19E-68 | 0.6727691 | 0.528 | 0.385 | 5.28E-64 | 2.1 | FRYL      | 1.371428571 |
| CDK8         | 7.39E-68 | 0.674549  | 0.379 | 0.228 | 1.78E-63 | 2.1 | CDK8      | 1.662280702 |
| MAST2        | 1.20E-67 | 0.703331  | 0.359 | 0.211 | 2.90E-63 | 2.1 | MAST2     | 1.701421801 |
| USP121       | 1.03E-65 | 0.6595098 | 0.317 | 0.178 | 2.48E-61 | 2.1 | USP12     | 1.780898876 |
| PDLIM53      | 1.58E-65 | 0.5367336 | 0.831 | 0.734 | 3.82E-61 | 2.1 | PDLIM5    | 1.132152589 |
| P4HA1        | 1.15E-64 | 0.9063382 | 0.506 | 0.374 | 2.76E-60 | 2.1 | P4HA1     | 1.352941176 |
| MAPK8        | 3.58E-64 | 0.7210765 | 0.467 | 0.322 | 8.64E-60 | 2.1 | MAPK8     | 1.450310559 |
| LIMCH1       | 1.66E-62 | 0.7510446 | 0.607 | 0.477 | 3.99E-58 | 2.1 | LIMCH1    | 1.272536688 |
| CTA-392E5.1  | 7.09E-62 | 0.4417376 | 0.097 | 0.027 | 1.71E-57 | 2.1 | CTA-392E5 | 3.592592593 |
| ERO1A        | 7.45E-62 | 0.9461618 | 0.543 | 0.431 | 1.80E-57 | 2.1 | ERO1A     | 1.259860789 |
| AUH1         | 2.17E-61 | 0.6603538 | 0.485 | 0.342 | 5.24E-57 | 2.1 | AUH       | 1.418128655 |
| FAM171B      | 2.48E-61 | 0.4105449 | 0.105 | 0.031 | 5.97E-57 | 2.1 | FAM171B   | 3.387096774 |
| PLOD2        | 2.57E-61 | 0.9513787 | 0.366 | 0.227 | 6.19E-57 | 2.1 | PLOD2     | 1.612334802 |
| TOX3         | 2.86E-61 | 0.5688606 | 0.297 | 0.159 | 6.90E-57 | 2.1 | TOX3      | 1.867924528 |
| SAMSN1       | 3.55E-61 | 0.2965191 | 0.081 | 0.019 | 8.57E-57 | 2.1 | SAMSN1    | 4.263157895 |
| MIPOL1       | 9.45E-61 | 0.6825692 | 0.308 | 0.173 | 2.28E-56 | 2.1 | MIPOL1    | 1.780346821 |
| HIPK2        | 1.04E-60 | 0.5949877 | 0.497 | 0.362 | 2.50E-56 | 2.1 | HIPK2     | 1.372928177 |
| FGF13        | 1.13E-60 | 0.6829484 | 0.596 | 0.439 | 2.73E-56 | 2.1 | FGF13     | 1.357630979 |
| OSER12       | 1.74E-60 | 0.4652601 | 0.626 | 0.48  | 4.19E-56 | 2.1 | OSER1     | 1.304166667 |
| SLC7A2       | 2.47E-60 | 0.4696608 | 0.461 | 0.286 | 5.94E-56 | 2.1 | SLC7A2    | 1.611888112 |
| ENAH1        | 2.52E-60 | 0.5528372 | 0.658 | 0.543 | 6.07E-56 | 2.1 | ENAH      | 1.211786372 |

|               |          |           |       |       |          |     |             |             |
|---------------|----------|-----------|-------|-------|----------|-----|-------------|-------------|
| DUSP10        | 3.16E-60 | 0.5430666 | 0.359 | 0.212 | 7.62E-56 | 2.1 | DUSP10      | 1.693396226 |
| TPH2          | 3.57E-60 | 0.3101391 | 0.072 | 0.016 | 8.61E-56 | 2.1 | TPH2        | 4.5         |
| MAP3K1        | 7.10E-60 | 0.5365419 | 0.605 | 0.444 | 1.71E-55 | 2.1 | MAP3K1      | 1.362612613 |
| NEDD4L1       | 8.04E-60 | 0.7647892 | 0.671 | 0.592 | 1.94E-55 | 2.1 | NEDD4L      | 1.133445946 |
| RP11-507B12.2 | 1.22E-59 | 0.4659939 | 0.207 | 0.092 | 2.93E-55 | 2.1 | RP11-507B   | 2.25        |
| ELOVL5        | 2.15E-59 | 0.4566434 | 0.441 | 0.282 | 5.17E-55 | 2.1 | ELOVL5      | 1.563829787 |
| ZSWIM6        | 2.51E-59 | 0.558187  | 0.617 | 0.487 | 6.05E-55 | 2.1 | ZSWIM6      | 1.266940452 |
| IGFBP4        | 3.57E-59 | 0.543973  | 0.257 | 0.129 | 8.62E-55 | 2.1 | IGFBP4      | 1.992248062 |
| NFKB11        | 3.71E-59 | 0.659944  | 0.564 | 0.44  | 8.95E-55 | 2.1 | NFKB1       | 1.281818182 |
| SMAD3         | 8.28E-59 | 0.6055378 | 0.407 | 0.258 | 2.00E-54 | 2.1 | SMAD3       | 1.57751938  |
| INTS6         | 8.38E-59 | 0.6787923 | 0.41  | 0.27  | 2.02E-54 | 2.1 | INTS6       | 1.518518519 |
| NPR3          | 2.12E-57 | 0.2261846 | 0.052 | 0.009 | 5.12E-53 | 2.1 | NPR3        | 5.777777778 |
| NME7          | 1.15E-56 | 0.6421152 | 0.26  | 0.138 | 2.78E-52 | 2.1 | NME7        | 1.884057971 |
| ACTN11        | 1.54E-56 | 0.5710714 | 0.475 | 0.33  | 3.70E-52 | 2.1 | ACTN1       | 1.439393939 |
| MAST41        | 2.10E-56 | 0.6254765 | 0.643 | 0.518 | 5.07E-52 | 2.1 | MAST4       | 1.241312741 |
| MED13         | 5.95E-56 | 0.5856499 | 0.518 | 0.388 | 1.44E-51 | 2.1 | MED13       | 1.335051546 |
| CCNG2         | 9.51E-56 | 0.5936134 | 0.335 | 0.201 | 2.29E-51 | 2.1 | CCNG2       | 1.666666667 |
| NCEH1         | 5.02E-55 | 0.6047724 | 0.544 | 0.402 | 1.21E-50 | 2.1 | NCEH1       | 1.353233831 |
| RANBP9        | 1.25E-54 | 0.6044745 | 0.421 | 0.288 | 3.02E-50 | 2.1 | RANBP9      | 1.461805556 |
| DAAM12        | 1.48E-54 | 0.5509852 | 0.609 | 0.499 | 3.57E-50 | 2.1 | DAAM1       | 1.220440882 |
| RP11-554D13.1 | 4.80E-54 | 0.3236285 | 0.067 | 0.015 | 1.16E-49 | 2.1 | RP11-554D   | 4.466666667 |
| DCP2          | 5.27E-54 | 0.5971657 | 0.29  | 0.166 | 1.27E-49 | 2.1 | DCP2        | 1.746987952 |
| AF165138.7    | 8.94E-54 | 0.2262025 | 0.058 | 0.012 | 2.15E-49 | 2.1 | AF165138.   | 4.833333333 |
| ATP2B41       | 1.01E-53 | 0.7255304 | 0.474 | 0.347 | 2.45E-49 | 2.1 | ATP2B4      | 1.365994236 |
| ZFC3H1        | 2.08E-53 | 0.6152707 | 0.377 | 0.248 | 5.01E-49 | 2.1 | ZFC3H1      | 1.52016129  |
| KLHL24        | 3.11E-53 | 0.585361  | 0.467 | 0.34  | 7.51E-49 | 2.1 | KLHL24      | 1.373529412 |
| HSPH1         | 3.68E-53 | 0.5344348 | 0.413 | 0.273 | 8.88E-49 | 2.1 | HSPH1       | 1.512820513 |
| BTG1          | 3.78E-53 | 0.4834286 | 0.676 | 0.573 | 9.11E-49 | 2.1 | BTG1        | 1.179755672 |
| SH3BP4        | 7.68E-53 | 0.5396674 | 0.27  | 0.149 | 1.85E-48 | 2.1 | SH3BP4      | 1.812080537 |
| MEF2A1        | 2.09E-52 | 0.5911693 | 0.535 | 0.411 | 5.04E-48 | 2.1 | MEF2A       | 1.301703163 |
| LCOR          | 2.61E-52 | 0.6183192 | 0.384 | 0.255 | 6.29E-48 | 2.1 | LCOR        | 1.505882353 |
| SYT1          | 6.40E-52 | 0.2948592 | 0.077 | 0.02  | 1.54E-47 | 2.1 | SYT1        | 3.85        |
| SHROOM3       | 8.59E-52 | 0.4737181 | 0.722 | 0.623 | 2.07E-47 | 2.1 | SHROOM3     | 1.158908507 |
| CORIN         | 9.87E-52 | 0.2971033 | 0.069 | 0.017 | 2.38E-47 | 2.1 | CORIN       | 4.058823529 |
| TBC1D10A      | 1.17E-51 | 0.7801783 | 0.266 | 0.145 | 2.81E-47 | 2.1 | TBC1D10A    | 1.834482759 |
| UBR4          | 2.60E-51 | 0.574392  | 0.346 | 0.22  | 6.28E-47 | 2.1 | UBR4        | 1.572727273 |
| TGIF1         | 2.84E-51 | 0.6049931 | 0.334 | 0.209 | 6.85E-47 | 2.1 | TGIF1       | 1.598086124 |
| RP11-282I1.1  | 3.22E-51 | 0.3232303 | 0.09  | 0.027 | 7.77E-47 | 2.1 | RP11-282I1  | 3.333333333 |
| AAK1          | 3.81E-51 | 0.5420354 | 0.278 | 0.157 | 9.19E-47 | 2.1 | AAK1        | 1.770700637 |
| SCP2          | 1.16E-50 | 0.5420282 | 0.441 | 0.313 | 2.81E-46 | 2.1 | SCP2        | 1.408945687 |
| PJA21         | 1.45E-50 | 0.620007  | 0.355 | 0.231 | 3.49E-46 | 2.1 | PJA2        | 1.536796537 |
| TSPAN15       | 4.20E-50 | 0.4776462 | 0.198 | 0.095 | 1.01E-45 | 2.1 | TSPAN15     | 2.084210526 |
| FNDC3B        | 1.73E-49 | 0.5226912 | 0.802 | 0.77  | 4.16E-45 | 2.1 | FNDC3B      | 1.041558442 |
| ACTG1         | 2.31E-49 | 0.6250293 | 0.789 | 0.719 | 5.57E-45 | 2.1 | ACTG1       | 1.097357441 |
| GCNT2         | 6.19E-49 | 0.8556479 | 0.528 | 0.438 | 1.49E-44 | 2.1 | GCNT2       | 1.205479452 |
| CDH14         | 8.65E-49 | 0.4925809 | 0.691 | 0.598 | 2.08E-44 | 2.1 | CDH1        | 1.155518395 |
| BAZ1A         | 1.16E-48 | 0.5854735 | 0.492 | 0.375 | 2.79E-44 | 2.1 | BAZ1A       | 1.312       |
| RP4-800F24.1  | 1.52E-48 | 0.2759155 | 0.066 | 0.016 | 3.67E-44 | 2.1 | RP4-800F24. | 4.125       |
| XG            | 2.09E-48 | 0.2490544 | 0.048 | 0.009 | 5.04E-44 | 2.1 | XG          | 5.333333333 |
| DNAJB9        | 2.65E-48 | 0.4507568 | 0.178 | 0.082 | 6.38E-44 | 2.1 | DNAJB9      | 2.170731707 |
| ANGPTL1       | 5.50E-48 | 0.5303419 | 0.247 | 0.135 | 1.33E-43 | 2.1 | ANGPTL1     | 1.82962963  |
| FLNB1         | 2.02E-47 | 0.5491271 | 0.564 | 0.448 | 4.86E-43 | 2.1 | FLNB        | 1.258928571 |

|             |          |           |       |       |          |     |           |             |
|-------------|----------|-----------|-------|-------|----------|-----|-----------|-------------|
| AC026202.31 | 2.60E-47 | 0.5862807 | 0.318 | 0.197 | 6.26E-43 | 2.1 | AC026202. | 1.614213198 |
| NEU3        | 2.70E-47 | 0.2582004 | 0.076 | 0.021 | 6.51E-43 | 2.1 | NEU3      | 3.619047619 |
| UBR51       | 2.99E-47 | 0.5252045 | 0.568 | 0.461 | 7.22E-43 | 2.1 | UBR5      | 1.232104121 |
| CCDC73      | 5.33E-47 | 0.5571304 | 0.199 | 0.098 | 1.29E-42 | 2.1 | CCDC73    | 2.030612245 |
| FXYD3       | 6.95E-47 | 0.47194   | 0.709 | 0.627 | 1.68E-42 | 2.1 | FXYD3     | 1.130781499 |
| ANKRD17     | 8.56E-47 | 0.52195   | 0.597 | 0.501 | 2.06E-42 | 2.1 | ANKRD17   | 1.191616766 |
| DIAPH1      | 1.23E-46 | 0.5630864 | 0.409 | 0.288 | 2.96E-42 | 2.1 | DIAPH1    | 1.420138889 |
| ARIH1       | 2.15E-46 | 0.4850016 | 0.605 | 0.5   | 5.18E-42 | 2.1 | ARIH1     | 1.21        |
| UBE2G1      | 2.39E-46 | 0.5828861 | 0.366 | 0.247 | 5.75E-42 | 2.1 | UBE2G1    | 1.481781377 |
| CD2AP2      | 3.37E-46 | 0.6229858 | 0.526 | 0.419 | 8.14E-42 | 2.1 | CD2AP     | 1.255369928 |
| MXD11       | 3.46E-46 | 0.6525659 | 0.323 | 0.202 | 8.34E-42 | 2.1 | MXD1      | 1.599009901 |
| MAP2K11     | 4.89E-46 | 0.5570008 | 0.363 | 0.243 | 1.18E-41 | 2.1 | MAP2K1    | 1.49382716  |
| RSRC21      | 7.25E-46 | 0.5086428 | 0.683 | 0.62  | 1.75E-41 | 2.1 | RSRC2     | 1.101612903 |
| REL         | 9.05E-46 | 0.5624793 | 0.413 | 0.29  | 2.18E-41 | 2.1 | REL       | 1.424137931 |
| PPP2CB1     | 2.29E-45 | 0.5099012 | 0.446 | 0.33  | 5.52E-41 | 2.1 | PPP2CB    | 1.351515152 |
| ELMO2       | 2.61E-45 | 0.4407742 | 0.181 | 0.087 | 6.29E-41 | 2.1 | ELMO2     | 2.08045977  |
| MAP41       | 3.21E-45 | 0.5400921 | 0.572 | 0.473 | 7.73E-41 | 2.1 | MAP4      | 1.209302326 |
| JUND        | 3.95E-44 | 0.4981503 | 0.278 | 0.165 | 9.51E-40 | 2.1 | JUND      | 1.684848485 |
| TOR1AIP21   | 5.74E-44 | 0.5371555 | 0.374 | 0.26  | 1.38E-39 | 2.1 | TOR1AIP2  | 1.438461538 |
| RAB21       | 1.41E-43 | 0.5365163 | 0.372 | 0.253 | 3.39E-39 | 2.1 | RAB21     | 1.470355731 |
| RLF1        | 1.91E-43 | 0.4896185 | 0.458 | 0.337 | 4.60E-39 | 2.1 | RLF       | 1.359050445 |
| HNRNPM      | 1.92E-43 | 0.5030583 | 0.371 | 0.253 | 4.64E-39 | 2.1 | HNRNPM    | 1.466403162 |
| OLA1        | 2.91E-43 | 0.571166  | 0.428 | 0.315 | 7.02E-39 | 2.1 | OLA1      | 1.358730159 |
| GOLGA41     | 3.39E-43 | 0.4320645 | 0.683 | 0.615 | 8.17E-39 | 2.1 | GOLGA4    | 1.110569106 |
| PGM2L1      | 5.10E-43 | 0.5747942 | 0.341 | 0.224 | 1.23E-38 | 2.1 | PGM2L1    | 1.522321429 |
| ABCD3       | 5.74E-43 | 0.5626859 | 0.282 | 0.171 | 1.39E-38 | 2.1 | ABCD3     | 1.649122807 |
| RASAL22     | 7.07E-43 | 0.6094288 | 0.613 | 0.536 | 1.71E-38 | 2.1 | RASAL2    | 1.143656716 |
| OCLN1       | 7.61E-43 | 0.5207461 | 0.439 | 0.328 | 1.84E-38 | 2.1 | OCLN      | 1.338414634 |
| PTHLH       | 1.22E-42 | 0.3189704 | 0.367 | 0.224 | 2.94E-38 | 2.1 | PTHLH     | 1.638392857 |
| AGR3        | 1.42E-42 | 0.4512829 | 0.337 | 0.206 | 3.43E-38 | 2.1 | AGR3      | 1.63592233  |
| PVRL2       | 1.42E-42 | 0.4878793 | 0.398 | 0.274 | 3.43E-38 | 2.1 | PVRL2     | 1.452554745 |
| SLC9C1      | 2.03E-42 | 0.4033082 | 0.126 | 0.051 | 4.90E-38 | 2.1 | SLC9C1    | 2.470588235 |
| PIAS1       | 2.25E-42 | 0.5004929 | 0.569 | 0.478 | 5.43E-38 | 2.1 | PIAS1     | 1.190376569 |
| SRPK2       | 2.35E-42 | 0.6302112 | 0.506 | 0.405 | 5.67E-38 | 2.1 | SRPK2     | 1.249382716 |
| IGF1R       | 3.32E-42 | 0.4965016 | 0.59  | 0.496 | 8.01E-38 | 2.1 | IGF1R     | 1.189516129 |
| BMPR1B1     | 1.14E-41 | 0.5545485 | 0.127 | 0.052 | 2.76E-37 | 2.1 | BMPR1B    | 2.442307692 |
| NBEAL1      | 1.68E-41 | 0.360326  | 0.767 | 0.711 | 4.04E-37 | 2.1 | NBEAL1    | 1.078762307 |
| LSAMP       | 1.71E-41 | 0.4481734 | 0.589 | 0.461 | 4.12E-37 | 2.1 | LSAMP     | 1.277657267 |
| MAGI3       | 2.83E-41 | 0.5061625 | 0.493 | 0.374 | 6.82E-37 | 2.1 | MAGI3     | 1.318181818 |
| TBC1D23     | 4.56E-41 | 0.5205244 | 0.287 | 0.18  | 1.10E-36 | 2.1 | TBC1D23   | 1.594444444 |
| WWC2        | 6.03E-41 | 0.5669757 | 0.3   | 0.189 | 1.45E-36 | 2.1 | WWC2      | 1.587301587 |
| FBP1        | 8.06E-41 | 0.2795262 | 0.091 | 0.032 | 1.94E-36 | 2.1 | FBP1      | 2.84375     |
| GSTK1       | 1.57E-40 | 0.429395  | 0.234 | 0.132 | 3.78E-36 | 2.1 | GSTK1     | 1.772727273 |
| GSK3B       | 1.64E-40 | 0.5054916 | 0.499 | 0.391 | 3.95E-36 | 2.1 | GSK3B     | 1.276214834 |
| TM9SF2      | 1.84E-40 | 0.5333619 | 0.359 | 0.249 | 4.43E-36 | 2.1 | TM9SF2    | 1.441767068 |
| CTBP2       | 3.71E-40 | 0.5199897 | 0.443 | 0.336 | 8.95E-36 | 2.1 | CTBP2     | 1.318452381 |
| DPY19L1     | 3.73E-40 | 0.4222619 | 0.178 | 0.089 | 9.00E-36 | 2.1 | DPY19L1   | 2           |
| PUM21       | 3.76E-40 | 0.5139794 | 0.503 | 0.406 | 9.06E-36 | 2.1 | PUM2      | 1.238916256 |
| CCDC83      | 3.81E-40 | 0.2335463 | 0.062 | 0.017 | 9.19E-36 | 2.1 | CCDC83    | 3.647058824 |
| EPB41L5     | 5.51E-40 | 0.5473984 | 0.398 | 0.287 | 1.33E-35 | 2.1 | EPB41L5   | 1.386759582 |
| SND11       | 1.33E-39 | 0.5714127 | 0.412 | 0.309 | 3.21E-35 | 2.1 | SND1      | 1.333333333 |
| RAD23B1     | 2.17E-39 | 0.4415338 | 0.571 | 0.477 | 5.22E-35 | 2.1 | RAD23B    | 1.19706499  |

|             |          |           |       |       |          |     |           |             |
|-------------|----------|-----------|-------|-------|----------|-----|-----------|-------------|
| UBR2        | 2.73E-39 | 0.5124776 | 0.482 | 0.381 | 6.59E-35 | 2.1 | UBR2      | 1.265091864 |
| TMOD3       | 2.88E-39 | 0.4868746 | 0.502 | 0.394 | 6.94E-35 | 2.1 | TMOD3     | 1.274111675 |
| TMEM1651    | 3.68E-39 | 0.6082975 | 0.587 | 0.516 | 8.86E-35 | 2.1 | TMEM165   | 1.137596899 |
| PIP4K2A     | 3.94E-39 | 0.5860103 | 0.203 | 0.111 | 9.49E-35 | 2.1 | PIP4K2A   | 1.828828829 |
| AIM1        | 4.08E-39 | 0.5597875 | 0.541 | 0.438 | 9.83E-35 | 2.1 | AIM1      | 1.235159817 |
| NUP1531     | 5.56E-39 | 0.506106  | 0.385 | 0.274 | 1.34E-34 | 2.1 | NUP153    | 1.405109489 |
| ARL5B       | 5.58E-39 | 0.3916244 | 0.193 | 0.1   | 1.34E-34 | 2.1 | ARL5B     | 1.93        |
| GATSL2      | 8.21E-39 | 0.2857821 | 0.094 | 0.034 | 1.98E-34 | 2.1 | GATSL2    | 2.764705882 |
| CMYA5       | 9.12E-39 | 0.4554645 | 0.189 | 0.098 | 2.20E-34 | 2.1 | CMYA5     | 1.928571429 |
| NFIL31      | 1.32E-38 | 0.4757215 | 0.287 | 0.18  | 3.19E-34 | 2.1 | NFIL3     | 1.594444444 |
| CXCL81      | 1.96E-38 | 0.4980531 | 0.551 | 0.436 | 4.73E-34 | 2.1 | CXCL8     | 1.263761468 |
| AP1S3       | 3.36E-38 | 0.4292503 | 0.211 | 0.115 | 8.11E-34 | 2.1 | AP1S3     | 1.834782609 |
| SCUBE2      | 5.23E-38 | 0.375357  | 0.127 | 0.055 | 1.26E-33 | 2.1 | SCUBE2    | 2.309090909 |
| HERPUD11    | 7.85E-38 | 0.5911265 | 0.319 | 0.215 | 1.89E-33 | 2.1 | HERPUD1   | 1.48372093  |
| MANF        | 8.05E-38 | 0.3348436 | 0.129 | 0.057 | 1.94E-33 | 2.1 | MANF      | 2.263157895 |
| NFAT51      | 8.77E-38 | 0.4423623 | 0.682 | 0.624 | 2.11E-33 | 2.1 | NFAT5     | 1.092948718 |
| NPEPPS1     | 9.60E-38 | 0.5087538 | 0.569 | 0.489 | 2.32E-33 | 2.1 | NPEPPS    | 1.163599182 |
| STX18       | 1.03E-37 | 0.4526244 | 0.269 | 0.166 | 2.48E-33 | 2.1 | STX18     | 1.620481928 |
| PDIA31      | 1.79E-37 | 0.4769335 | 0.409 | 0.298 | 4.32E-33 | 2.1 | PDIA3     | 1.372483221 |
| HNRNPC1     | 2.09E-37 | 0.3320027 | 0.807 | 0.782 | 5.05E-33 | 2.1 | HNRNPC    | 1.031969309 |
| ZNF165      | 2.40E-37 | 0.475246  | 0.181 | 0.094 | 5.78E-33 | 2.1 | ZNF165    | 1.925531915 |
| TLL2        | 2.85E-37 | 0.2162406 | 0.053 | 0.013 | 6.86E-33 | 2.1 | TLL2      | 4.076923077 |
| MSRB3       | 4.17E-37 | 0.2261773 | 0.056 | 0.015 | 1.01E-32 | 2.1 | MSRB3     | 3.733333333 |
| DUSP16      | 5.37E-37 | 0.4873783 | 0.519 | 0.413 | 1.29E-32 | 2.1 | DUSP16    | 1.256658596 |
| PRDX3       | 5.39E-37 | 0.4664059 | 0.324 | 0.217 | 1.30E-32 | 2.1 | PRDX3     | 1.493087558 |
| ABI12       | 1.57E-36 | 0.3971978 | 0.731 | 0.674 | 3.79E-32 | 2.1 | ABI1      | 1.084569733 |
| PLEKHA8     | 1.86E-36 | 0.4534367 | 0.201 | 0.111 | 4.50E-32 | 2.1 | PLEKHA8   | 1.810810811 |
| RP11-90K6.1 | 2.53E-36 | 0.2018691 | 0.042 | 0.009 | 6.10E-32 | 2.1 | RP11-90K6 | 4.666666667 |
| ATXN2       | 3.43E-36 | 0.5438614 | 0.425 | 0.327 | 8.27E-32 | 2.1 | ATXN2     | 1.29969419  |
| APLP2       | 5.93E-36 | 0.4617677 | 0.378 | 0.269 | 1.43E-31 | 2.1 | APLP2     | 1.405204461 |
| ECE1        | 6.57E-36 | 0.5059003 | 0.281 | 0.179 | 1.59E-31 | 2.1 | ECE1      | 1.569832402 |
| GLRA1       | 2.42E-35 | 0.2315948 | 0.054 | 0.014 | 5.83E-31 | 2.1 | GLRA1     | 3.857142857 |
| LYST        | 3.01E-35 | 0.493375  | 0.372 | 0.265 | 7.27E-31 | 2.1 | LYST      | 1.403773585 |
| LINC01031   | 4.59E-35 | 0.1861743 | 0.051 | 0.013 | 1.11E-30 | 2.1 | LINC01031 | 3.923076923 |
| FANK1       | 4.79E-35 | 0.4749256 | 0.238 | 0.143 | 1.15E-30 | 2.1 | FANK1     | 1.664335664 |
| AFF3        | 4.83E-35 | 0.1679763 | 0.474 | 0.327 | 1.17E-30 | 2.1 | AFF3      | 1.449541284 |
| MKLN1       | 5.28E-35 | 0.3844364 | 0.713 | 0.659 | 1.27E-30 | 2.1 | MKLN1     | 1.081942337 |
| Sep-04      | 5.94E-35 | 0.1740413 | 0.055 | 0.015 | 1.43E-30 | 2.1 | Sep-04    | 3.666666667 |
| WDR44       | 6.75E-35 | 0.4611584 | 0.253 | 0.156 | 1.63E-30 | 2.1 | WDR44     | 1.621794872 |
| PPP3CA      | 7.87E-35 | 0.4708959 | 0.638 | 0.558 | 1.90E-30 | 2.1 | PPP3CA    | 1.143369176 |
| ZBTB10      | 1.16E-34 | 0.5098104 | 0.35  | 0.249 | 2.79E-30 | 2.1 | ZBTB10    | 1.40562249  |
| ARSJ        | 1.56E-34 | 0.3291181 | 0.115 | 0.05  | 3.77E-30 | 2.1 | ARSJ      | 2.3         |
| SELK2       | 1.95E-34 | 0.5649251 | 0.655 | 0.608 | 4.69E-30 | 2.1 | SELK      | 1.077302632 |
| RNF10       | 2.79E-34 | 0.4893459 | 0.317 | 0.217 | 6.72E-30 | 2.1 | RNF10     | 1.460829493 |
| CTNND1      | 2.84E-34 | 0.4797334 | 0.474 | 0.389 | 6.85E-30 | 2.1 | CTNND1    | 1.218508997 |
| TNRC6B      | 3.44E-34 | 0.5134507 | 0.554 | 0.482 | 8.29E-30 | 2.1 | TNRC6B    | 1.149377593 |
| KDM2A       | 3.89E-34 | 0.4741967 | 0.51  | 0.431 | 9.37E-30 | 2.1 | KDM2A     | 1.183294664 |
| GPBP1L1     | 4.07E-34 | 0.4844382 | 0.43  | 0.336 | 9.81E-30 | 2.1 | GPBP1L1   | 1.279761905 |
| CERS6       | 4.56E-34 | 0.4662414 | 0.256 | 0.158 | 1.10E-29 | 2.1 | CERS6     | 1.620253165 |
| UBE2R2      | 1.01E-33 | 0.4707505 | 0.451 | 0.363 | 2.44E-29 | 2.1 | UBE2R2    | 1.242424242 |
| TMEM41B     | 1.12E-33 | 0.522404  | 0.339 | 0.242 | 2.70E-29 | 2.1 | TMEM41B   | 1.400826446 |
| PIK3C2A     | 1.76E-33 | 0.5484421 | 0.393 | 0.301 | 4.24E-29 | 2.1 | PIK3C2A   | 1.305647841 |

|              |          |           |       |       |          |     |            |             |
|--------------|----------|-----------|-------|-------|----------|-----|------------|-------------|
| MANBA        | 1.92E-33 | 0.4076707 | 0.127 | 0.059 | 4.63E-29 | 2.1 | MANBA      | 2.152542373 |
| SEMA3E       | 2.56E-33 | 0.4657707 | 0.226 | 0.135 | 6.17E-29 | 2.1 | SEMA3E     | 1.674074074 |
| COPA         | 2.88E-33 | 0.5824942 | 0.398 | 0.311 | 6.96E-29 | 2.1 | COPA       | 1.279742765 |
| RAB181       | 3.14E-33 | 0.4739969 | 0.429 | 0.332 | 7.58E-29 | 2.1 | RAB18      | 1.292168675 |
| SERF2        | 3.44E-33 | 0.3881839 | 0.491 | 0.386 | 8.30E-29 | 2.1 | SERF2      | 1.272020725 |
| TMCO3        | 3.58E-33 | 0.4144551 | 0.22  | 0.13  | 8.63E-29 | 2.1 | TMCO3      | 1.692307692 |
| CHMP4B       | 9.54E-33 | 0.4121209 | 0.282 | 0.184 | 2.30E-28 | 2.1 | CHMP4B     | 1.532608696 |
| PRKG1        | 1.20E-32 | 0.6816778 | 0.234 | 0.141 | 2.89E-28 | 2.1 | PRKG1      | 1.659574468 |
| PSME42       | 1.33E-32 | 0.2942496 | 0.705 | 0.634 | 3.21E-28 | 2.1 | PSME4      | 1.111987382 |
| SLC7A8       | 1.95E-32 | 0.2399762 | 0.097 | 0.039 | 4.70E-28 | 2.1 | SLC7A8     | 2.487179487 |
| DENND5A1     | 3.76E-32 | 0.4598177 | 0.427 | 0.331 | 9.07E-28 | 2.1 | DENND5A    | 1.290030211 |
| WAC1         | 4.01E-32 | 0.3757826 | 0.677 | 0.625 | 9.66E-28 | 2.1 | WAC        | 1.0832      |
| CD99         | 5.37E-32 | 0.3752733 | 0.221 | 0.129 | 1.29E-27 | 2.1 | CD99       | 1.713178295 |
| RB1CC1       | 6.80E-32 | 0.4341471 | 0.552 | 0.477 | 1.64E-27 | 2.1 | RB1CC1     | 1.157232704 |
| CYTH1        | 9.36E-32 | 0.391192  | 0.237 | 0.146 | 2.26E-27 | 2.1 | CYTH1      | 1.623287671 |
| PTPN13       | 9.98E-32 | 0.4962256 | 0.269 | 0.172 | 2.41E-27 | 2.1 | PTPN13     | 1.563953488 |
| CNOT2        | 1.20E-31 | 0.5324322 | 0.474 | 0.398 | 2.88E-27 | 2.1 | CNOT2      | 1.190954774 |
| GLI3         | 1.22E-31 | 0.4045662 | 0.218 | 0.129 | 2.95E-27 | 2.1 | GLI3       | 1.689922481 |
| CALR         | 1.36E-31 | 0.4781815 | 0.318 | 0.219 | 3.28E-27 | 2.1 | CALR       | 1.452054795 |
| GADD45A1     | 1.44E-31 | 0.4620872 | 0.361 | 0.258 | 3.48E-27 | 2.1 | GADD45A    | 1.399224806 |
| AC017101.10  | 1.52E-31 | 0.3803176 | 0.163 | 0.086 | 3.67E-27 | 2.1 | AC017101.  | 1.895348837 |
| GADD45B      | 2.22E-31 | 0.4640195 | 0.186 | 0.103 | 5.35E-27 | 2.1 | GADD45B    | 1.805825243 |
| HS6ST2       | 4.21E-31 | 0.4171281 | 0.232 | 0.14  | 1.01E-26 | 2.1 | HS6ST2     | 1.657142857 |
| PLEKHB2      | 5.05E-31 | 0.3957255 | 0.249 | 0.156 | 1.22E-26 | 2.1 | PLEKHB2    | 1.596153846 |
| STX17-AS1    | 5.28E-31 | 0.1869151 | 0.047 | 0.013 | 1.27E-26 | 2.1 | STX17-AS1  | 3.615384615 |
| USP34        | 7.59E-31 | 0.3630463 | 0.697 | 0.648 | 1.83E-26 | 2.1 | USP34      | 1.075617284 |
| USP25        | 7.92E-31 | 0.536388  | 0.344 | 0.252 | 1.91E-26 | 2.1 | USP25      | 1.365079365 |
| TFF1         | 9.50E-31 | 0.5342343 | 0.182 | 0.099 | 2.29E-26 | 2.1 | TFF1       | 1.838383838 |
| ABHD18       | 9.85E-31 | 0.5123625 | 0.429 | 0.337 | 2.38E-26 | 2.1 | ABHD18     | 1.272997033 |
| NDUFV2       | 1.03E-30 | 0.4446587 | 0.362 | 0.263 | 2.48E-26 | 2.1 | NDUFV2     | 1.376425856 |
| RNF149       | 1.28E-30 | 0.5012165 | 0.427 | 0.341 | 3.08E-26 | 2.1 | RNF149     | 1.252199413 |
| HK21         | 1.78E-30 | 0.5186967 | 0.25  | 0.16  | 4.30E-26 | 2.1 | HK2        | 1.5625      |
| BMP2K        | 3.32E-30 | 0.4275716 | 0.171 | 0.094 | 8.00E-26 | 2.1 | BMP2K      | 1.819148936 |
| ZNF1431      | 3.35E-30 | 0.4449479 | 0.236 | 0.149 | 8.07E-26 | 2.1 | ZNF143     | 1.583892617 |
| LNX2         | 3.73E-30 | 0.4254632 | 0.228 | 0.14  | 9.00E-26 | 2.1 | LNX2       | 1.628571429 |
| CAPZB        | 4.62E-30 | 0.4440775 | 0.273 | 0.182 | 1.11E-25 | 2.1 | CAPZB      | 1.5         |
| PIP4K2C      | 5.42E-30 | 0.3533453 | 0.142 | 0.072 | 1.31E-25 | 2.1 | PIP4K2C    | 1.972222222 |
| PRPS2        | 6.08E-30 | 0.296035  | 0.147 | 0.075 | 1.47E-25 | 2.1 | PRPS2      | 1.96        |
| LVRN         | 8.06E-30 | 0.1442521 | 0.035 | 0.008 | 1.94E-25 | 2.1 | LVRN       | 4.375       |
| TNIK         | 8.86E-30 | 0.4440068 | 0.246 | 0.154 | 2.14E-25 | 2.1 | TNIK       | 1.597402597 |
| OSBPL8       | 1.30E-29 | 0.5703314 | 0.322 | 0.232 | 3.13E-25 | 2.1 | OSBPL8     | 1.387931034 |
| WWP1         | 1.61E-29 | 0.47511   | 0.394 | 0.304 | 3.89E-25 | 2.1 | WWP1       | 1.296052632 |
| SMURF1       | 1.83E-29 | 0.488445  | 0.447 | 0.36  | 4.40E-25 | 2.1 | SMURF1     | 1.241666667 |
| NPTN         | 2.33E-29 | 0.4280872 | 0.281 | 0.189 | 5.61E-25 | 2.1 | NPTN       | 1.486772487 |
| KCMF11       | 2.34E-29 | 0.3996637 | 0.424 | 0.33  | 5.63E-25 | 2.1 | KCMF1      | 1.284848485 |
| EDEM1        | 2.53E-29 | 0.2645442 | 0.091 | 0.038 | 6.10E-25 | 2.1 | EDEM1      | 2.394736842 |
| PICALM       | 2.54E-29 | 0.4453512 | 0.515 | 0.442 | 6.13E-25 | 2.1 | PICALM     | 1.165158371 |
| RP1-31316.12 | 2.74E-29 | 0.3663275 | 0.166 | 0.09  | 6.61E-25 | 2.1 | RP1-31316. | 1.844444444 |
| QKI1         | 3.05E-29 | 0.4290424 | 0.601 | 0.535 | 7.35E-25 | 2.1 | QKI        | 1.123364486 |
| MALRD1       | 3.32E-29 | 0.3045291 | 0.096 | 0.041 | 8.01E-25 | 2.1 | MALRD1     | 2.341463415 |
| NBPF14       | 3.75E-29 | 0.4230051 | 0.238 | 0.151 | 9.05E-25 | 2.1 | NBPF14     | 1.57615894  |
| RIC1         | 4.11E-29 | 0.5070044 | 0.256 | 0.17  | 9.91E-25 | 2.1 | RIC1       | 1.505882353 |

|               |          |           |       |       |          |     |           |             |
|---------------|----------|-----------|-------|-------|----------|-----|-----------|-------------|
| HEPACAM2      | 4.51E-29 | 0.229894  | 0.092 | 0.038 | 1.09E-24 | 2.1 | HEPACAM2  | 2.421052632 |
| PIK3CA        | 5.42E-29 | 0.4432939 | 0.369 | 0.279 | 1.31E-24 | 2.1 | PIK3CA    | 1.322580645 |
| RP11-274H2.2  | 9.61E-29 | 0.4175747 | 0.121 | 0.058 | 2.32E-24 | 2.1 | RP11-274H | 2.086206897 |
| TMEM136       | 9.81E-29 | 0.442093  | 0.157 | 0.085 | 2.37E-24 | 2.1 | TMEM136   | 1.847058824 |
| RP3-404K8.2   | 1.41E-28 | 0.1367761 | 0.035 | 0.008 | 3.39E-24 | 2.1 | RP3-404K8 | 4.375       |
| ZNF395        | 1.60E-28 | 0.2928202 | 0.095 | 0.041 | 3.86E-24 | 2.1 | ZNF395    | 2.317073171 |
| DCUN1D2       | 1.68E-28 | 0.3444015 | 0.131 | 0.066 | 4.06E-24 | 2.1 | DCUN1D2   | 1.984848485 |
| SLAIN2        | 1.68E-28 | 0.4193976 | 0.217 | 0.134 | 4.06E-24 | 2.1 | SLAIN2    | 1.619402985 |
| RP11-84A19.41 | 2.20E-28 | 0.2750541 | 0.109 | 0.05  | 5.30E-24 | 2.1 | RP11-84A1 | 2.18        |
| TMED2         | 2.28E-28 | 0.4191782 | 0.278 | 0.189 | 5.50E-24 | 2.1 | TMED2     | 1.470899471 |
| FILIP1L       | 2.33E-28 | 0.3729295 | 0.184 | 0.106 | 5.63E-24 | 2.1 | FILIP1L   | 1.735849057 |
| GPR75-ASB3    | 3.57E-28 | 0.4731908 | 0.245 | 0.161 | 8.61E-24 | 2.1 | GPR75-ASB | 1.52173913  |
| DLC1          | 5.38E-28 | 0.4048373 | 0.123 | 0.06  | 1.30E-23 | 2.1 | DLC1      | 2.05        |
| MKL11         | 6.66E-28 | 0.4146643 | 0.558 | 0.492 | 1.60E-23 | 2.1 | MKL1      | 1.134146341 |
| CREBZF        | 7.30E-28 | 0.34262   | 0.126 | 0.062 | 1.76E-23 | 2.1 | CREBZF    | 2.032258065 |
| LINC00290     | 1.29E-27 | 0.35982   | 0.07  | 0.026 | 3.12E-23 | 2.1 | LINC00290 | 2.692307692 |
| PLAC9         | 1.32E-27 | 0.2102927 | 0.059 | 0.02  | 3.17E-23 | 2.1 | PLAC9     | 2.95        |
| DIO2          | 2.33E-27 | 0.185494  | 0.327 | 0.215 | 5.62E-23 | 2.1 | DIO2      | 1.520930233 |
| ASB15         | 2.40E-27 | 0.1103281 | 0.028 | 0.005 | 5.80E-23 | 2.1 | ASB15     | 5.6         |
| SLC41A2       | 2.70E-27 | 0.4737919 | 0.19  | 0.114 | 6.52E-23 | 2.1 | SLC41A2   | 1.666666667 |
| LARGE         | 3.00E-27 | 0.5275998 | 0.405 | 0.321 | 7.23E-23 | 2.1 | LARGE     | 1.261682243 |
| RANBP10       | 3.81E-27 | 0.3667609 | 0.148 | 0.08  | 9.18E-23 | 2.1 | RANBP10   | 1.85        |
| KMT2A1        | 3.90E-27 | 0.41104   | 0.489 | 0.415 | 9.41E-23 | 2.1 | KMT2A     | 1.178313253 |
| NFRKB         | 4.10E-27 | 0.3533807 | 0.144 | 0.077 | 9.90E-23 | 2.1 | NFRKB     | 1.87012987  |
| CSGALNACT2    | 4.60E-27 | 0.3503583 | 0.199 | 0.12  | 1.11E-22 | 2.1 | CSGALNAC  | 1.658333333 |
| SNX311        | 4.62E-27 | 0.2409222 | 0.081 | 0.033 | 1.11E-22 | 2.1 | SNX31     | 2.454545455 |
| UGDH-AS1      | 6.00E-27 | 0.4575708 | 0.179 | 0.104 | 1.45E-22 | 2.1 | UGDH-AS1  | 1.721153846 |
| GOLM1         | 7.11E-27 | 0.4144388 | 0.322 | 0.226 | 1.71E-22 | 2.1 | GOLM1     | 1.424778761 |
| RAB30         | 9.07E-27 | 0.3980229 | 0.194 | 0.116 | 2.19E-22 | 2.1 | RAB30     | 1.672413793 |
| GS1-114I9.3   | 1.22E-26 | 0.4799667 | 0.281 | 0.197 | 2.95E-22 | 2.1 | GS1-114I9 | 1.426395939 |
| PPP1R15B      | 1.68E-26 | 0.3241183 | 0.13  | 0.067 | 4.05E-22 | 2.1 | PPP1R15B  | 1.940298507 |
| CKS2          | 1.81E-26 | 0.4351158 | 0.297 | 0.211 | 4.37E-22 | 2.1 | CKS2      | 1.407582938 |
| FSIP1         | 1.95E-26 | 0.301285  | 0.104 | 0.048 | 4.70E-22 | 2.1 | FSIP1     | 2.166666667 |
| AFTPH1        | 2.21E-26 | 0.4567931 | 0.393 | 0.308 | 5.32E-22 | 2.1 | AFTPH     | 1.275974026 |
| BANP          | 2.22E-26 | 0.3507139 | 0.146 | 0.079 | 5.35E-22 | 2.1 | BANP      | 1.848101266 |
| SLC38A1       | 2.85E-26 | 0.4475289 | 0.468 | 0.387 | 6.88E-22 | 2.1 | SLC38A1   | 1.209302326 |
| EGOT          | 3.28E-26 | 0.407258  | 0.185 | 0.11  | 7.90E-22 | 2.1 | EGOT      | 1.681818182 |
| TSPAN13       | 3.31E-26 | 0.333074  | 0.182 | 0.107 | 7.98E-22 | 2.1 | TSPAN13   | 1.700934579 |
| KAT6B         | 3.58E-26 | 0.4828641 | 0.337 | 0.25  | 8.62E-22 | 2.1 | KAT6B     | 1.348       |
| SCGB2A2       | 4.36E-26 | 0.3268719 | 0.374 | 0.265 | 1.05E-21 | 2.1 | SCGB2A2   | 1.411320755 |
| CD44          | 5.12E-26 | 0.3632058 | 0.647 | 0.585 | 1.23E-21 | 2.1 | CD44      | 1.105982906 |
| CDYL          | 5.59E-26 | 0.4315186 | 0.392 | 0.306 | 1.35E-21 | 2.1 | CDYL      | 1.281045752 |
| RP11-390E23.3 | 5.63E-26 | 0.1511743 | 0.038 | 0.01  | 1.36E-21 | 2.1 | RP11-390E | 3.8         |
| RAPGEF4       | 7.08E-26 | 0.4658294 | 0.201 | 0.124 | 1.71E-21 | 2.1 | RAPGEF4   | 1.620967742 |
| LPAR3         | 7.65E-26 | 0.21241   | 0.087 | 0.037 | 1.85E-21 | 2.1 | LPAR3     | 2.351351351 |
| FAM188A       | 7.81E-26 | 0.3564595 | 0.166 | 0.095 | 1.88E-21 | 2.1 | FAM188A   | 1.747368421 |
| LINC01476     | 8.24E-26 | 0.2509632 | 0.063 | 0.023 | 1.99E-21 | 2.1 | LINC01476 | 2.739130435 |
| IER3          | 9.77E-26 | 0.5815977 | 0.404 | 0.312 | 2.36E-21 | 2.1 | IER3      | 1.294871795 |
| IMMP1L        | 1.10E-25 | 0.3814624 | 0.21  | 0.133 | 2.64E-21 | 2.1 | IMMP1L    | 1.578947368 |
| AP3S1         | 1.10E-25 | 0.3791399 | 0.176 | 0.105 | 2.64E-21 | 2.1 | AP3S1     | 1.676190476 |
| EFR3A         | 1.38E-25 | 0.4816052 | 0.284 | 0.203 | 3.33E-21 | 2.1 | EFR3A     | 1.399014778 |
| BRWD1         | 1.51E-25 | 0.4794372 | 0.441 | 0.369 | 3.63E-21 | 2.1 | BRWD1     | 1.195121951 |

|              |          |           |       |       |          |     |            |             |
|--------------|----------|-----------|-------|-------|----------|-----|------------|-------------|
| MORC31       | 1.63E-25 | 0.4289769 | 0.317 | 0.233 | 3.92E-21 | 2.1 | MORC3      | 1.360515021 |
| LEMD3        | 2.07E-25 | 0.3361273 | 0.153 | 0.086 | 4.98E-21 | 2.1 | LEMD3      | 1.779069767 |
| PAWR         | 2.78E-25 | 0.4163599 | 0.603 | 0.546 | 6.69E-21 | 2.1 | PAWR       | 1.104395604 |
| PGR          | 3.17E-25 | 0.3281165 | 0.143 | 0.077 | 7.65E-21 | 2.1 | PGR        | 1.857142857 |
| KIAA0430     | 3.33E-25 | 0.3941344 | 0.199 | 0.125 | 8.03E-21 | 2.1 | KIAA0430   | 1.592       |
| F11R1        | 3.52E-25 | 0.4247648 | 0.276 | 0.194 | 8.49E-21 | 2.1 | F11R       | 1.422680412 |
| LIFR1        | 3.82E-25 | 0.4943424 | 0.223 | 0.145 | 9.22E-21 | 2.1 | LIFR       | 1.537931034 |
| IL1RN        | 5.48E-25 | 0.2614415 | 0.101 | 0.047 | 1.32E-20 | 2.1 | IL1RN      | 2.14893617  |
| RSF1         | 6.83E-25 | 0.4279711 | 0.442 | 0.368 | 1.65E-20 | 2.1 | RSF1       | 1.201086957 |
| LPP          | 7.65E-25 | 0.2350203 | 0.933 | 0.914 | 1.84E-20 | 2.1 | LPP        | 1.020787746 |
| RAB3IP       | 8.10E-25 | 0.3893921 | 0.212 | 0.135 | 1.95E-20 | 2.1 | RAB3IP     | 1.57037037  |
| CFAP1611     | 9.69E-25 | 0.327439  | 0.082 | 0.035 | 2.34E-20 | 2.1 | CFAP161    | 2.342857143 |
| ZSCAN16-AS1  | 1.24E-24 | 0.3207699 | 0.152 | 0.086 | 2.98E-20 | 2.1 | ZSCAN16-A  | 1.76744186  |
| CFAP70       | 1.33E-24 | 0.2625559 | 0.087 | 0.038 | 3.21E-20 | 2.1 | CFAP70     | 2.289473684 |
| GAPVD11      | 1.38E-24 | 0.4574005 | 0.305 | 0.226 | 3.32E-20 | 2.1 | GAPVD1     | 1.349557522 |
| CASK         | 1.49E-24 | 0.4894929 | 0.436 | 0.367 | 3.59E-20 | 2.1 | CASK       | 1.188010899 |
| RP11-48B3.4  | 1.51E-24 | 0.1675803 | 0.046 | 0.014 | 3.64E-20 | 2.1 | RP11-48B3  | 3.285714286 |
| SBNO1        | 1.54E-24 | 0.3926423 | 0.222 | 0.145 | 3.72E-20 | 2.1 | SBNO1      | 1.531034483 |
| SLC17A8      | 1.83E-24 | 0.1925008 | 0.048 | 0.015 | 4.41E-20 | 2.1 | SLC17A8    | 3.2         |
| AKIRIN1      | 1.83E-24 | 0.3698261 | 0.194 | 0.121 | 4.42E-20 | 2.1 | AKIRIN1    | 1.603305785 |
| PHF12        | 1.93E-24 | 0.352996  | 0.163 | 0.095 | 4.65E-20 | 2.1 | PHF12      | 1.715789474 |
| HMGNS        | 2.05E-24 | 0.3000703 | 0.123 | 0.063 | 4.94E-20 | 2.1 | HMGNS      | 1.952380952 |
| BICC1        | 2.61E-24 | 0.3019586 | 0.077 | 0.033 | 6.30E-20 | 2.1 | BICC1      | 2.333333333 |
| PCBP11       | 2.68E-24 | 0.3957315 | 0.555 | 0.501 | 6.47E-20 | 2.1 | PCBP1      | 1.107784431 |
| FOXK1        | 2.83E-24 | 0.4327727 | 0.256 | 0.177 | 6.82E-20 | 2.1 | FOXK1      | 1.446327684 |
| DRC1         | 3.65E-24 | 0.10694   | 0.03  | 0.007 | 8.80E-20 | 2.1 | DRC1       | 4.285714286 |
| FNIP2        | 5.02E-24 | 0.3878482 | 0.173 | 0.102 | 1.21E-19 | 2.1 | FNIP2      | 1.696078431 |
| PLK2         | 5.34E-24 | 0.5683975 | 0.2   | 0.128 | 1.29E-19 | 2.1 | PLK2       | 1.5625      |
| JAG1         | 5.53E-24 | 0.2865306 | 0.086 | 0.038 | 1.33E-19 | 2.1 | JAG1       | 2.263157895 |
| ZDHHC7       | 7.51E-24 | 0.2756659 | 0.118 | 0.061 | 1.81E-19 | 2.1 | ZDHHC7     | 1.93442623  |
| PARD6B       | 8.59E-24 | 0.407505  | 0.255 | 0.175 | 2.07E-19 | 2.1 | PARD6B     | 1.457142857 |
| RBMS1        | 1.21E-23 | 0.4885207 | 0.409 | 0.339 | 2.91E-19 | 2.1 | RBMS1      | 1.206489676 |
| EIF2AK31     | 1.32E-23 | 0.3326418 | 0.447 | 0.355 | 3.18E-19 | 2.1 | EIF2AK3    | 1.25915493  |
| CBL          | 1.44E-23 | 0.4122784 | 0.181 | 0.111 | 3.48E-19 | 2.1 | CBL        | 1.630630631 |
| RBBP6        | 1.62E-23 | 0.4084879 | 0.355 | 0.275 | 3.90E-19 | 2.1 | RBBP6      | 1.290909091 |
| YPEL2        | 1.83E-23 | 0.3556964 | 0.18  | 0.11  | 4.41E-19 | 2.1 | YPEL2      | 1.636363636 |
| ATF21        | 2.20E-23 | 0.3366711 | 0.209 | 0.134 | 5.31E-19 | 2.1 | ATF2       | 1.559701493 |
| KDM6A        | 2.31E-23 | 0.4406006 | 0.431 | 0.362 | 5.57E-19 | 2.1 | KDM6A      | 1.190607735 |
| AC106900.6   | 2.44E-23 | 0.1503444 | 0.038 | 0.011 | 5.89E-19 | 2.1 | AC106900.1 | 3.454545455 |
| PTP4A2       | 3.21E-23 | 0.4047478 | 0.216 | 0.142 | 7.75E-19 | 2.1 | PTP4A2     | 1.521126761 |
| DEPDC1B      | 3.45E-23 | 0.1832693 | 0.037 | 0.01  | 8.33E-19 | 2.1 | DEPDC1B    | 3.7         |
| QSOX1        | 3.80E-23 | 0.3870873 | 0.223 | 0.146 | 9.16E-19 | 2.1 | QSOX1      | 1.52739726  |
| WHSC1        | 4.07E-23 | 0.4171141 | 0.25  | 0.173 | 9.81E-19 | 2.1 | WHSC1      | 1.445086705 |
| NPFFR2       | 4.37E-23 | 0.1974932 | 0.06  | 0.023 | 1.05E-18 | 2.1 | NPFFR2     | 2.608695652 |
| DCAF63       | 5.23E-23 | 0.4101354 | 0.486 | 0.424 | 1.26E-18 | 2.1 | DCAF6      | 1.146226415 |
| ATP5EP2      | 5.97E-23 | 0.4207164 | 0.379 | 0.298 | 1.44E-18 | 2.1 | ATP5EP2    | 1.271812081 |
| RP11-96O20.4 | 7.14E-23 | 0.1224436 | 0.033 | 0.009 | 1.72E-18 | 2.1 | RP11-96O2  | 3.666666667 |
| DNAJC3       | 8.12E-23 | 0.4555698 | 0.329 | 0.254 | 1.96E-18 | 2.1 | DNAJC3     | 1.295275591 |
| FAM69A       | 8.22E-23 | 0.4545408 | 0.15  | 0.086 | 1.98E-18 | 2.1 | FAM69A     | 1.744186047 |
| SGMS1        | 8.22E-23 | 0.5022197 | 0.38  | 0.305 | 1.98E-18 | 2.1 | SGMS1      | 1.245901639 |
| TCF12        | 8.64E-23 | 0.3964307 | 0.627 | 0.592 | 2.08E-18 | 2.1 | TCF12      | 1.059121622 |
| PDGFB        | 1.34E-22 | 0.2747109 | 0.082 | 0.036 | 3.22E-18 | 2.1 | PDGFB      | 2.277777778 |

|               |          |           |       |       |          |     |           |             |
|---------------|----------|-----------|-------|-------|----------|-----|-----------|-------------|
| SPDYA         | 1.49E-22 | 0.3887085 | 0.165 | 0.098 | 3.59E-18 | 2.1 | SPDYA     | 1.683673469 |
| LMCD1         | 1.57E-22 | 0.3526299 | 0.173 | 0.103 | 3.79E-18 | 2.1 | LMCD1     | 1.67961165  |
| NUTM2A-AS11   | 1.85E-22 | 0.4878765 | 0.366 | 0.297 | 4.47E-18 | 2.1 | NUTM2A-A  | 1.232323232 |
| SCAF41        | 1.89E-22 | 0.3277587 | 0.166 | 0.099 | 4.55E-18 | 2.1 | SCAF4     | 1.676767677 |
| ZFAND2A       | 1.95E-22 | 0.2335819 | 0.08  | 0.035 | 4.69E-18 | 2.1 | ZFAND2A   | 2.285714286 |
| DIXDC1        | 2.09E-22 | 0.5274392 | 0.179 | 0.111 | 5.05E-18 | 2.1 | DIXDC1    | 1.612612613 |
| KANSL1        | 2.40E-22 | 0.3907901 | 0.474 | 0.407 | 5.80E-18 | 2.1 | KANSL1    | 1.164619165 |
| NBPF19        | 2.62E-22 | 0.4202714 | 0.288 | 0.209 | 6.33E-18 | 2.1 | NBPF19    | 1.377990431 |
| RAPGEF22      | 2.85E-22 | 0.3724658 | 0.493 | 0.416 | 6.87E-18 | 2.1 | RAPGEF2   | 1.185096154 |
| CDC271        | 3.58E-22 | 0.3883914 | 0.335 | 0.257 | 8.63E-18 | 2.1 | CDC27     | 1.303501946 |
| SFMBT2        | 3.61E-22 | 0.3971656 | 0.241 | 0.163 | 8.71E-18 | 2.1 | SFMBT2    | 1.478527607 |
| ARHGEF381     | 3.72E-22 | 0.5312059 | 0.53  | 0.481 | 8.96E-18 | 2.1 | ARHGEF38  | 1.101871102 |
| MEGF9         | 3.79E-22 | 0.3973374 | 0.199 | 0.128 | 9.15E-18 | 2.1 | MEGF9     | 1.5546875   |
| MLEC          | 5.36E-22 | 0.2807405 | 0.136 | 0.076 | 1.29E-17 | 2.1 | MLEC      | 1.789473684 |
| PKP2          | 6.73E-22 | 0.3700176 | 0.152 | 0.09  | 1.62E-17 | 2.1 | PKP2      | 1.688888889 |
| ELF2          | 7.94E-22 | 0.4336166 | 0.449 | 0.384 | 1.91E-17 | 2.1 | ELF2      | 1.169270833 |
| UBE2K         | 8.85E-22 | 0.416756  | 0.435 | 0.377 | 2.13E-17 | 2.1 | UBE2K     | 1.153846154 |
| LINC01214     | 8.99E-22 | 0.1368631 | 0.038 | 0.011 | 2.17E-17 | 2.1 | LINC01214 | 3.454545455 |
| ATP5E         | 9.25E-22 | 0.3868128 | 0.589 | 0.554 | 2.23E-17 | 2.1 | ATP5E     | 1.063176895 |
| WDR481        | 1.02E-21 | 0.3884735 | 0.256 | 0.183 | 2.45E-17 | 2.1 | WDR48     | 1.398907104 |
| MTURN         | 1.35E-21 | 0.4181458 | 0.228 | 0.157 | 3.27E-17 | 2.1 | MTURN     | 1.452229299 |
| KLF12         | 1.95E-21 | 0.4292337 | 0.215 | 0.141 | 4.71E-17 | 2.1 | KLF12     | 1.524822695 |
| GSG1L         | 3.43E-21 | 0.1515864 | 0.044 | 0.015 | 8.28E-17 | 2.1 | GSG1L     | 2.933333333 |
| YY1           | 3.64E-21 | 0.3736313 | 0.289 | 0.215 | 8.77E-17 | 2.1 | YY1       | 1.344186047 |
| PGM32         | 3.70E-21 | 0.3313951 | 0.159 | 0.096 | 8.91E-17 | 2.1 | PGM3      | 1.65625     |
| ARID5B1       | 3.93E-21 | 0.2932847 | 0.756 | 0.732 | 9.47E-17 | 2.1 | ARID5B    | 1.032786885 |
| MSL1          | 3.98E-21 | 0.3775629 | 0.218 | 0.147 | 9.59E-17 | 2.1 | MSL1      | 1.482993197 |
| ACVR1C        | 4.11E-21 | 0.2183008 | 0.058 | 0.023 | 9.91E-17 | 2.1 | ACVR1C    | 2.52173913  |
| CMBL          | 4.23E-21 | 0.1677361 | 0.055 | 0.021 | 1.02E-16 | 2.1 | CMBL      | 2.619047619 |
| SYT9          | 5.72E-21 | 0.2351679 | 0.086 | 0.04  | 1.38E-16 | 2.1 | SYT9      | 2.15        |
| RAPH1         | 7.44E-21 | 0.4274001 | 0.403 | 0.331 | 1.79E-16 | 2.1 | RAPH1     | 1.217522659 |
| FEM1C         | 7.99E-21 | 0.3238444 | 0.133 | 0.075 | 1.93E-16 | 2.1 | FEM1C     | 1.773333333 |
| COL4A5        | 8.25E-21 | 0.3340951 | 0.298 | 0.213 | 1.99E-16 | 2.1 | COL4A5    | 1.399061033 |
| LMTK2         | 8.63E-21 | 0.4339901 | 0.259 | 0.187 | 2.08E-16 | 2.1 | LMTK2     | 1.385026738 |
| SLMAP1        | 8.73E-21 | 0.3418467 | 0.694 | 0.673 | 2.10E-16 | 2.1 | SLMAP     | 1.031203566 |
| NF1           | 8.91E-21 | 0.403064  | 0.544 | 0.502 | 2.15E-16 | 2.1 | NF1       | 1.083665339 |
| INTS2         | 1.41E-20 | 0.2635647 | 0.086 | 0.041 | 3.40E-16 | 2.1 | INTS2     | 2.097560976 |
| RNF11         | 1.65E-20 | 0.3508046 | 0.317 | 0.241 | 3.99E-16 | 2.1 | RNF11     | 1.315352697 |
| CTD-2528L19.4 | 1.75E-20 | 0.2154519 | 0.091 | 0.044 | 4.22E-16 | 2.1 | CTD-2528L | 2.068181818 |
| RP11-486O13.4 | 1.79E-20 | 0.3064816 | 0.163 | 0.099 | 4.32E-16 | 2.1 | RP11-486O | 1.646464646 |
| MAP3K19       | 2.21E-20 | 0.1728912 | 0.053 | 0.02  | 5.32E-16 | 2.1 | MAP3K19   | 2.65        |
| LAPTM4A       | 2.29E-20 | 0.4026877 | 0.392 | 0.323 | 5.52E-16 | 2.1 | LAPTM4A   | 1.213622291 |
| HTT           | 2.62E-20 | 0.3641979 | 0.233 | 0.162 | 6.31E-16 | 2.1 | HTT       | 1.438271605 |
| MIB1          | 2.97E-20 | 0.3888474 | 0.445 | 0.379 | 7.15E-16 | 2.1 | MIB1      | 1.17414248  |
| RP13-270P17.3 | 3.24E-20 | 0.3571478 | 0.073 | 0.033 | 7.82E-16 | 2.1 | RP13-270P | 2.212121212 |
| THRAP3        | 3.88E-20 | 0.4277528 | 0.348 | 0.282 | 9.36E-16 | 2.1 | THRAP3    | 1.234042553 |
| PEBP4         | 5.83E-20 | 0.2847262 | 0.153 | 0.091 | 1.41E-15 | 2.1 | PEBP4     | 1.681318681 |
| SOX4          | 6.57E-20 | 0.2582769 | 0.882 | 0.835 | 1.58E-15 | 2.1 | SOX4      | 1.056287425 |
| AMPH          | 6.66E-20 | 0.368946  | 0.159 | 0.096 | 1.61E-15 | 2.1 | AMPH      | 1.65625     |
| MGLL          | 7.57E-20 | 0.367861  | 0.255 | 0.178 | 1.82E-15 | 2.1 | MGLL      | 1.43258427  |
| ITSN1         | 7.69E-20 | 0.4059823 | 0.263 | 0.191 | 1.85E-15 | 2.1 | ITSN1     | 1.376963351 |
| PIK3C3        | 7.79E-20 | 0.3094282 | 0.171 | 0.108 | 1.88E-15 | 2.1 | PIK3C3    | 1.583333333 |



|               |          |           |       |       |          |     |              |             |
|---------------|----------|-----------|-------|-------|----------|-----|--------------|-------------|
| FBXO111       | 9.83E-20 | 0.3834348 | 0.45  | 0.387 | 2.37E-15 | 2.1 | FBXO11       | 1.162790698 |
| CCDC13        | 1.03E-19 | 0.1402279 | 0.042 | 0.014 | 2.48E-15 | 2.1 | CCDC13       | 3           |
| PDIA61        | 1.05E-19 | 0.3829832 | 0.298 | 0.225 | 2.52E-15 | 2.1 | PDIA6        | 1.324444444 |
| KLHL13        | 1.11E-19 | 0.2940357 | 0.17  | 0.104 | 2.69E-15 | 2.1 | KLHL13       | 1.634615385 |
| GPS2          | 1.18E-19 | 0.3980414 | 0.235 | 0.165 | 2.85E-15 | 2.1 | GPS2         | 1.424242424 |
| AZGP1         | 1.24E-19 | 0.2631791 | 0.629 | 0.541 | 2.99E-15 | 2.1 | AZGP1        | 1.162661738 |
| ATP5I         | 1.27E-19 | 0.3019633 | 0.208 | 0.138 | 3.06E-15 | 2.1 | ATP5I        | 1.507246377 |
| TSC1          | 1.39E-19 | 0.2517746 | 0.099 | 0.051 | 3.34E-15 | 2.1 | TSC1         | 1.941176471 |
| SARAF         | 1.42E-19 | 0.3599813 | 0.416 | 0.348 | 3.41E-15 | 2.1 | SARAF        | 1.195402299 |
| FGFR11        | 1.47E-19 | 0.4312638 | 0.259 | 0.187 | 3.53E-15 | 2.1 | FGFR1        | 1.385026738 |
| STAU1         | 1.54E-19 | 0.3720865 | 0.301 | 0.23  | 3.72E-15 | 2.1 | STAU1        | 1.308695652 |
| AC107218.3    | 1.62E-19 | 0.2212566 | 0.066 | 0.029 | 3.90E-15 | 2.1 | AC107218.3   | 2.275862069 |
| FEM1B1        | 2.08E-19 | 0.355454  | 0.234 | 0.164 | 5.01E-15 | 2.1 | FEM1B        | 1.426829268 |
| PCMTD11       | 2.17E-19 | 0.3770671 | 0.398 | 0.337 | 5.23E-15 | 2.1 | PCMTD1       | 1.181008902 |
| TBX3          | 2.66E-19 | 0.2655695 | 0.352 | 0.264 | 6.41E-15 | 2.1 | TBX3         | 1.333333333 |
| KMT2E         | 2.76E-19 | 0.3898897 | 0.514 | 0.462 | 6.67E-15 | 2.1 | KMT2E        | 1.112554113 |
| PPP2R2D       | 2.90E-19 | 0.3788543 | 0.245 | 0.175 | 6.99E-15 | 2.1 | PPP2R2D      | 1.4         |
| SEC23IP       | 2.97E-19 | 0.3175009 | 0.155 | 0.096 | 7.17E-15 | 2.1 | SEC23IP      | 1.614583333 |
| MGEA5         | 3.61E-19 | 0.4034893 | 0.459 | 0.405 | 8.71E-15 | 2.1 | MGEA5        | 1.133333333 |
| MYH92         | 4.61E-19 | 0.2704158 | 0.572 | 0.51  | 1.11E-14 | 2.1 | MYH9         | 1.121568627 |
| CTD-2033A16.3 | 5.30E-19 | 0.1720888 | 0.055 | 0.022 | 1.28E-14 | 2.1 | CTD-2033A    | 2.5         |
| AZIN1         | 5.31E-19 | 0.3665272 | 0.271 | 0.199 | 1.28E-14 | 2.1 | AZIN1        | 1.361809045 |
| CYTH3         | 6.17E-19 | 0.3669148 | 0.174 | 0.112 | 1.49E-14 | 2.1 | CYTH3        | 1.553571429 |
| ITGA91        | 6.79E-19 | 0.2250114 | 0.063 | 0.027 | 1.64E-14 | 2.1 | ITGA9        | 2.333333333 |
| GOLGB11       | 7.54E-19 | 0.3597595 | 0.432 | 0.37  | 1.82E-14 | 2.1 | GOLGB1       | 1.167567568 |
| BRWD3         | 7.92E-19 | 0.4449193 | 0.252 | 0.186 | 1.91E-14 | 2.1 | BRWD3        | 1.35483871  |
| SAMD4A1       | 8.52E-19 | 0.3726169 | 0.665 | 0.62  | 2.05E-14 | 2.1 | SAMD4A       | 1.072580645 |
| ADAM10        | 1.07E-18 | 0.3831355 | 0.434 | 0.37  | 2.59E-14 | 2.1 | ADAM10       | 1.172972973 |
| NFKBIA1       | 1.14E-18 | 0.3288049 | 0.664 | 0.625 | 2.76E-14 | 2.1 | NFKBIA       | 1.0624      |
| CCBE1         | 1.17E-18 | 0.2522358 | 0.091 | 0.046 | 2.82E-14 | 2.1 | CCBE1        | 1.97826087  |
| TOP2B1        | 1.22E-18 | 0.3466918 | 0.258 | 0.187 | 2.94E-14 | 2.1 | TOP2B        | 1.379679144 |
| CDK13         | 2.06E-18 | 0.3546781 | 0.478 | 0.42  | 4.96E-14 | 2.1 | CDK13        | 1.138095238 |
| KLHL28        | 2.34E-18 | 0.2807585 | 0.161 | 0.102 | 5.63E-14 | 2.1 | KLHL28       | 1.578431373 |
| ERP44         | 2.56E-18 | 0.3652136 | 0.202 | 0.138 | 6.17E-14 | 2.1 | ERP44        | 1.463768116 |
| TTC28         | 2.67E-18 | 0.4068891 | 0.225 | 0.158 | 6.43E-14 | 2.1 | TTC28        | 1.424050633 |
| PTPRK         | 2.72E-18 | 0.3428334 | 0.772 | 0.772 | 6.57E-14 | 2.1 | PTPRK        | 1           |
| RAB22A        | 3.85E-18 | 0.3078992 | 0.198 | 0.135 | 9.28E-14 | 2.1 | RAB22A       | 1.466666667 |
| AP000695.6    | 3.88E-18 | 0.1165515 | 0.026 | 0.007 | 9.36E-14 | 2.1 | AP000695.6   | 3.714285714 |
| KIAA1324      | 3.95E-18 | 0.3154643 | 0.297 | 0.223 | 9.52E-14 | 2.1 | KIAA1324     | 1.331838565 |
| RP11-252E2.2  | 4.10E-18 | 0.1269866 | 0.033 | 0.01  | 9.88E-14 | 2.1 | RP11-252E2.2 | 3.3         |
| FRZB          | 4.11E-18 | 0.1204669 | 0.036 | 0.012 | 9.92E-14 | 2.1 | FRZB         | 3           |
| DNAH5         | 4.90E-18 | 0.2571072 | 0.115 | 0.064 | 1.18E-13 | 2.1 | DNAH5        | 1.796875    |
| ROCK21        | 5.27E-18 | 0.3981551 | 0.351 | 0.285 | 1.27E-13 | 2.1 | ROCK2        | 1.231578947 |
| RP11-212D19.4 | 5.73E-18 | 0.1692116 | 0.07  | 0.032 | 1.38E-13 | 2.1 | RP11-212D    | 2.1875      |
| CDC37L1       | 6.02E-18 | 0.2718673 | 0.111 | 0.062 | 1.45E-13 | 2.1 | CDC37L1      | 1.790322581 |
| ITGA5         | 6.49E-18 | 0.3003304 | 0.154 | 0.096 | 1.57E-13 | 2.1 | ITGA5        | 1.604166667 |
| DNAH12        | 9.07E-18 | 0.2143545 | 0.054 | 0.022 | 2.19E-13 | 2.1 | DNAH12       | 2.454545455 |
| WEE11         | 9.10E-18 | 0.3610379 | 0.37  | 0.306 | 2.19E-13 | 2.1 | WEE1         | 1.209150327 |
| EMSY          | 9.44E-18 | 0.3587876 | 0.211 | 0.148 | 2.28E-13 | 2.1 | EMSY         | 1.425675676 |
| STRN1         | 9.55E-18 | 0.3767211 | 0.451 | 0.393 | 2.30E-13 | 2.1 | STRN         | 1.147582697 |
| RBFOX22       | 1.06E-17 | 0.2249268 | 0.942 | 0.953 | 2.54E-13 | 2.1 | RBFOX2       | 0.988457503 |
| TTC27         | 1.09E-17 | 0.4107239 | 0.099 | 0.054 | 2.63E-13 | 2.1 | TTC27        | 1.833333333 |

|              |          |           |       |       |          |     |           |             |
|--------------|----------|-----------|-------|-------|----------|-----|-----------|-------------|
| RPS10-NUDT3  | 1.10E-17 | 0.2055314 | 0.086 | 0.044 | 2.66E-13 | 2.1 | RPS10-NUC | 1.954545455 |
| EP300        | 1.23E-17 | 0.3062687 | 0.284 | 0.215 | 2.97E-13 | 2.1 | EP300     | 1.320930233 |
| CNN32        | 1.29E-17 | 0.3173982 | 0.56  | 0.512 | 3.12E-13 | 2.1 | CNN3      | 1.09375     |
| RP11-174G6.1 | 1.49E-17 | 0.2919256 | 0.109 | 0.061 | 3.59E-13 | 2.1 | RP11-174G | 1.786885246 |
| AC093901.1   | 1.60E-17 | 0.1097901 | 0.028 | 0.008 | 3.87E-13 | 2.1 | AC093901. | 3.5         |
| UACA1        | 1.61E-17 | 0.400103  | 0.259 | 0.195 | 3.88E-13 | 2.1 | UACA      | 1.328205128 |
| UBTD21       | 1.65E-17 | 0.3590254 | 0.209 | 0.146 | 3.99E-13 | 2.1 | UBTD2     | 1.431506849 |
| LINC01588    | 1.72E-17 | 0.2980207 | 0.154 | 0.097 | 4.15E-13 | 2.1 | LINC01588 | 1.587628866 |
| HOMER1       | 1.91E-17 | 0.360875  | 0.17  | 0.11  | 4.60E-13 | 2.1 | HOMER1    | 1.545454545 |
| RBM44        | 1.99E-17 | 0.1310953 | 0.038 | 0.013 | 4.79E-13 | 2.1 | RBM44     | 2.923076923 |
| ZBTB18       | 2.06E-17 | 0.2748947 | 0.119 | 0.069 | 4.98E-13 | 2.1 | ZBTB18    | 1.724637681 |
| PITPNB1      | 2.15E-17 | 0.3747688 | 0.366 | 0.305 | 5.18E-13 | 2.1 | PITPNB    | 1.2         |
| ERO1B        | 2.21E-17 | 0.3084644 | 0.15  | 0.094 | 5.32E-13 | 2.1 | ERO1B     | 1.595744681 |
| MTHFD2       | 2.58E-17 | 0.3080561 | 0.188 | 0.126 | 6.22E-13 | 2.1 | MTHFD2    | 1.492063492 |
| ARL8B1       | 3.08E-17 | 0.3672552 | 0.332 | 0.267 | 7.42E-13 | 2.1 | ARL8B     | 1.243445693 |
| MN1          | 3.41E-17 | 0.1286327 | 0.036 | 0.012 | 8.23E-13 | 2.1 | MN1       | 3           |
| STYK1        | 3.62E-17 | 0.3220107 | 0.111 | 0.063 | 8.73E-13 | 2.1 | STYK1     | 1.761904762 |
| GSR          | 4.12E-17 | 0.2350074 | 0.065 | 0.03  | 9.93E-13 | 2.1 | GSR       | 2.166666667 |
| EIF5AL1      | 4.12E-17 | 0.2179597 | 0.086 | 0.044 | 9.94E-13 | 2.1 | EIF5AL1   | 1.954545455 |
| PXDNL        | 4.25E-17 | 0.2186127 | 0.071 | 0.034 | 1.03E-12 | 2.1 | PXDNL     | 2.088235294 |
| NUSAP1       | 4.88E-17 | 0.2297676 | 0.09  | 0.047 | 1.18E-12 | 2.1 | NUSAP1    | 1.914893617 |
| PDK11        | 5.11E-17 | 0.3318883 | 0.147 | 0.092 | 1.23E-12 | 2.1 | PDK1      | 1.597826087 |
| CRY11        | 5.14E-17 | 0.3287063 | 0.447 | 0.381 | 1.24E-12 | 2.1 | CRY1      | 1.173228346 |
| REC114       | 5.27E-17 | 0.1122651 | 0.032 | 0.01  | 1.27E-12 | 2.1 | REC114    | 3.2         |
| CHSY11       | 5.41E-17 | 0.3607375 | 0.144 | 0.089 | 1.31E-12 | 2.1 | CHSY1     | 1.617977528 |
| BARD1        | 5.67E-17 | 0.3208883 | 0.141 | 0.088 | 1.37E-12 | 2.1 | BARD1     | 1.602272727 |
| STT3B        | 5.74E-17 | 0.3437835 | 0.243 | 0.179 | 1.38E-12 | 2.1 | STT3B     | 1.357541899 |
| LINC00607    | 5.98E-17 | 0.2442927 | 0.073 | 0.036 | 1.44E-12 | 2.1 | LINC00607 | 2.027777778 |
| ZNRF1        | 6.03E-17 | 0.3591427 | 0.226 | 0.162 | 1.46E-12 | 2.1 | ZNRF1     | 1.395061728 |
| TANC2        | 6.70E-17 | 0.2888598 | 0.543 | 0.471 | 1.62E-12 | 2.1 | TANC2     | 1.152866242 |
| DIP2B        | 7.12E-17 | 0.4090163 | 0.362 | 0.302 | 1.72E-12 | 2.1 | DIP2B     | 1.198675497 |
| MSI2         | 7.39E-17 | 0.3668701 | 0.399 | 0.339 | 1.78E-12 | 2.1 | MSI2      | 1.17699115  |
| BRAF         | 9.03E-17 | 0.3646038 | 0.469 | 0.417 | 2.18E-12 | 2.1 | BRAF      | 1.12470024  |
| GLUD1        | 1.41E-16 | 0.3504504 | 0.342 | 0.271 | 3.40E-12 | 2.1 | GLUD1     | 1.26199262  |
| TMEM59       | 1.73E-16 | 0.2895039 | 0.501 | 0.45  | 4.18E-12 | 2.1 | TMEM59    | 1.113333333 |
| IER5         | 1.86E-16 | 0.3295905 | 0.165 | 0.109 | 4.49E-12 | 2.1 | IER5      | 1.513761468 |
| VCL2         | 1.88E-16 | 0.429015  | 0.366 | 0.307 | 4.53E-12 | 2.1 | VCL       | 1.19218241  |
| RARA         | 2.08E-16 | 0.1511697 | 0.048 | 0.019 | 5.02E-12 | 2.1 | RARA      | 2.526315789 |
| EIF1         | 2.17E-16 | 0.2171578 | 0.537 | 0.476 | 5.24E-12 | 2.1 | EIF1      | 1.128151261 |
| FAM177A1     | 2.20E-16 | 0.2891107 | 0.179 | 0.121 | 5.32E-12 | 2.1 | FAM177A1  | 1.479338843 |
| GOLT1B       | 2.48E-16 | 0.3319456 | 0.199 | 0.139 | 5.98E-12 | 2.1 | GOLT1B    | 1.431654676 |
| DDB1         | 2.66E-16 | 0.3165554 | 0.184 | 0.124 | 6.40E-12 | 2.1 | DDB1      | 1.483870968 |
| ASPH         | 2.75E-16 | 0.3458019 | 0.35  | 0.28  | 6.63E-12 | 2.1 | ASPH      | 1.25        |
| NQO1         | 3.08E-16 | 0.1870487 | 0.107 | 0.06  | 7.44E-12 | 2.1 | NQO1      | 1.783333333 |
| AK3          | 3.56E-16 | 0.3514365 | 0.265 | 0.203 | 8.59E-12 | 2.1 | AK3       | 1.305418719 |
| GNAI3        | 4.24E-16 | 0.3104817 | 0.246 | 0.182 | 1.02E-11 | 2.1 | GNAI3     | 1.351648352 |
| WLS          | 4.96E-16 | 0.2724856 | 0.237 | 0.17  | 1.20E-11 | 2.1 | WLS       | 1.394117647 |
| C3orf35      | 5.34E-16 | 0.2763592 | 0.1   | 0.056 | 1.29E-11 | 2.1 | C3orf35   | 1.785714286 |
| P4HB         | 5.46E-16 | 0.3405024 | 0.192 | 0.134 | 1.32E-11 | 2.1 | P4HB      | 1.432835821 |
| TMA7         | 5.80E-16 | 0.3012948 | 0.615 | 0.602 | 1.40E-11 | 2.1 | TMA7      | 1.021594684 |
| WAPL         | 6.47E-16 | 0.3424409 | 0.251 | 0.189 | 1.56E-11 | 2.1 | WAPL      | 1.328042328 |
| VEZT         | 7.31E-16 | 0.3632973 | 0.418 | 0.368 | 1.76E-11 | 2.1 | VEZT      | 1.135869565 |

|               |          |           |       |       |          |     |           |             |
|---------------|----------|-----------|-------|-------|----------|-----|-----------|-------------|
| ACVR1         | 7.46E-16 | 0.3240104 | 0.194 | 0.135 | 1.80E-11 | 2.1 | ACVR1     | 1.437037037 |
| LINC01280     | 7.50E-16 | 0.108654  | 0.033 | 0.011 | 1.81E-11 | 2.1 | LINC01280 | 3           |
| SPAG91        | 8.38E-16 | 0.2955554 | 0.405 | 0.341 | 2.02E-11 | 2.1 | SPAG9     | 1.187683284 |
| EIF4G3        | 8.58E-16 | 0.3453904 | 0.565 | 0.508 | 2.07E-11 | 2.1 | EIF4G3    | 1.112204724 |
| DICER1        | 8.83E-16 | 0.3756235 | 0.261 | 0.199 | 2.13E-11 | 2.1 | DICER1    | 1.311557789 |
| CD164         | 1.04E-15 | 0.3414603 | 0.341 | 0.278 | 2.52E-11 | 2.1 | CD164     | 1.226618705 |
| IGFBP2        | 1.12E-15 | 0.199559  | 0.087 | 0.046 | 2.70E-11 | 2.1 | IGFBP2    | 1.891304348 |
| CFAP69        | 1.20E-15 | 0.2847794 | 0.156 | 0.101 | 2.89E-11 | 2.1 | CFAP69    | 1.544554455 |
| SEL1L1        | 1.20E-15 | 0.3034026 | 0.152 | 0.098 | 2.90E-11 | 2.1 | SEL1L     | 1.551020408 |
| TEAD11        | 1.27E-15 | 0.313743  | 0.504 | 0.449 | 3.06E-11 | 2.1 | TEAD1     | 1.122494432 |
| CST3          | 1.31E-15 | 0.2336563 | 0.109 | 0.063 | 3.16E-11 | 2.1 | CST3      | 1.73015873  |
| ABAT          | 1.34E-15 | 0.2536607 | 0.097 | 0.055 | 3.23E-11 | 2.1 | ABAT      | 1.763636364 |
| ANLN          | 1.80E-15 | 0.2195257 | 0.076 | 0.039 | 4.35E-11 | 2.1 | ANLN      | 1.948717949 |
| TRIM36        | 2.01E-15 | 0.1952648 | 0.065 | 0.031 | 4.86E-11 | 2.1 | TRIM36    | 2.096774194 |
| UQCRQ         | 2.03E-15 | 0.2699953 | 0.166 | 0.111 | 4.89E-11 | 2.1 | UQCRQ     | 1.495495495 |
| UBXN7         | 2.06E-15 | 0.2828921 | 0.155 | 0.103 | 4.97E-11 | 2.1 | UBXN7     | 1.504854369 |
| SPEN1         | 2.37E-15 | 0.3109395 | 0.325 | 0.262 | 5.72E-11 | 2.1 | SPEN      | 1.240458015 |
| CYB5A         | 2.47E-15 | 0.2533883 | 0.325 | 0.253 | 5.96E-11 | 2.1 | CYB5A     | 1.28458498  |
| BTBD7         | 2.61E-15 | 0.3597639 | 0.246 | 0.186 | 6.29E-11 | 2.1 | BTBD7     | 1.322580645 |
| RP11-1021N1.1 | 2.75E-15 | 0.1022294 | 0.028 | 0.009 | 6.63E-11 | 2.1 | RP11-1021 | 3.111111111 |
| CSNK1A1       | 2.76E-15 | 0.359984  | 0.659 | 0.656 | 6.66E-11 | 2.1 | CSNK1A1   | 1.004573171 |
| PPM1B         | 2.95E-15 | 0.3365507 | 0.264 | 0.204 | 7.12E-11 | 2.1 | PPM1B     | 1.294117647 |
| ELOVL7        | 3.05E-15 | 0.3050476 | 0.157 | 0.102 | 7.36E-11 | 2.1 | ELOVL7    | 1.539215686 |
| UBE2E1        | 3.32E-15 | 0.3743923 | 0.392 | 0.342 | 8.01E-11 | 2.1 | UBE2E1    | 1.14619883  |
| RNF128        | 3.34E-15 | 0.2988718 | 0.181 | 0.123 | 8.05E-11 | 2.1 | RNF128    | 1.471544715 |
| ATG16L1       | 3.57E-15 | 0.2772042 | 0.083 | 0.044 | 8.60E-11 | 2.1 | ATG16L1   | 1.886363636 |
| TMEM156       | 3.63E-15 | 0.3352543 | 0.088 | 0.047 | 8.74E-11 | 2.1 | TMEM156   | 1.872340426 |
| GABARAP       | 3.66E-15 | 0.2795801 | 0.423 | 0.357 | 8.83E-11 | 2.1 | GABARAP   | 1.18487395  |
| CHST7         | 3.95E-15 | 0.1573059 | 0.052 | 0.023 | 9.52E-11 | 2.1 | CHST7     | 2.260869565 |
| RAC1          | 4.13E-15 | 0.3040406 | 0.54  | 0.509 | 9.95E-11 | 2.1 | RAC1      | 1.060903733 |
| EGLN3         | 4.32E-15 | 0.4098732 | 0.199 | 0.142 | 1.04E-10 | 2.1 | EGLN3     | 1.401408451 |
| NUP58         | 4.44E-15 | 0.3099303 | 0.188 | 0.132 | 1.07E-10 | 2.1 | NUP58     | 1.424242424 |
| HSPA13        | 4.48E-15 | 0.180097  | 0.091 | 0.05  | 1.08E-10 | 2.1 | HSPA13    | 1.82        |
| MYOF          | 6.44E-15 | 0.2503618 | 0.634 | 0.597 | 1.55E-10 | 2.1 | MYOF      | 1.061976549 |
| TAF1D2        | 6.53E-15 | 0.3224884 | 0.324 | 0.263 | 1.58E-10 | 2.1 | TAF1D     | 1.231939163 |
| ATP6AP2       | 6.56E-15 | 0.281307  | 0.198 | 0.14  | 1.58E-10 | 2.1 | ATP6AP2   | 1.414285714 |
| SLC18A2       | 6.80E-15 | 0.1425198 | 0.044 | 0.018 | 1.64E-10 | 2.1 | SLC18A2   | 2.444444444 |
| AGO21         | 7.10E-15 | 0.3413366 | 0.266 | 0.207 | 1.71E-10 | 2.1 | AGO2      | 1.285024155 |
| CCDC591       | 7.15E-15 | 0.3722016 | 0.239 | 0.183 | 1.72E-10 | 2.1 | CCDC59    | 1.306010929 |
| RTKN2         | 7.42E-15 | 0.2372686 | 0.091 | 0.05  | 1.79E-10 | 2.1 | RTKN2     | 1.82        |
| UBL5          | 7.43E-15 | 0.3339254 | 0.535 | 0.508 | 1.79E-10 | 2.1 | UBL5      | 1.053149606 |
| RP3-523E19.2  | 7.93E-15 | 0.2217637 | 0.076 | 0.04  | 1.91E-10 | 2.1 | RP3-523E1 | 1.9         |
| RASSF32       | 8.53E-15 | 0.3638202 | 0.171 | 0.118 | 2.06E-10 | 2.1 | RASSF3    | 1.449152542 |
| KHDRBS11      | 9.29E-15 | 0.3910272 | 0.343 | 0.286 | 2.24E-10 | 2.1 | KHDRBS1   | 1.199300699 |
| SLC38A2       | 9.48E-15 | 0.2573178 | 0.448 | 0.377 | 2.29E-10 | 2.1 | SLC38A2   | 1.188328912 |
| WASF2         | 9.54E-15 | 0.3445746 | 0.306 | 0.246 | 2.30E-10 | 2.1 | WASF2     | 1.243902439 |
| HYOU1         | 1.00E-14 | 0.2313667 | 0.101 | 0.058 | 2.41E-10 | 2.1 | HYOU1     | 1.74137931  |
| FAM81B        | 1.06E-14 | 0.1123896 | 0.038 | 0.015 | 2.55E-10 | 2.1 | FAM81B    | 2.533333333 |
| SERPINA11     | 1.13E-14 | 0.1565887 | 0.066 | 0.032 | 2.72E-10 | 2.1 | SERPINA11 | 2.0625      |
| SMAD2         | 1.28E-14 | 0.3508191 | 0.354 | 0.3   | 3.09E-10 | 2.1 | SMAD2     | 1.18        |
| ANKLE21       | 1.34E-14 | 0.2990411 | 0.169 | 0.116 | 3.24E-10 | 2.1 | ANKLE2    | 1.456896552 |
| DRAM1         | 1.36E-14 | 0.3825413 | 0.349 | 0.293 | 3.28E-10 | 2.1 | DRAM1     | 1.19112628  |

|                |          |           |       |       |          |     |           |             |
|----------------|----------|-----------|-------|-------|----------|-----|-----------|-------------|
| CHD1           | 1.64E-14 | 0.3239028 | 0.324 | 0.267 | 3.95E-10 | 2.1 | CHD1      | 1.213483146 |
| MREG           | 1.65E-14 | 0.2941178 | 0.194 | 0.137 | 3.98E-10 | 2.1 | MREG      | 1.416058394 |
| FNBP1L1        | 1.79E-14 | 0.358819  | 0.465 | 0.416 | 4.32E-10 | 2.1 | FNBP1L    | 1.117788462 |
| CACUL11        | 1.91E-14 | 0.3431159 | 0.423 | 0.376 | 4.61E-10 | 2.1 | CACUL1    | 1.125       |
| LINC01170      | 2.60E-14 | 0.2697668 | 0.061 | 0.029 | 6.27E-10 | 2.1 | LINC01170 | 2.103448276 |
| NCKAP1         | 3.01E-14 | 0.2980637 | 0.471 | 0.431 | 7.26E-10 | 2.1 | NCKAP1    | 1.092807425 |
| ZBED5-AS11     | 3.24E-14 | 0.1481095 | 0.059 | 0.028 | 7.81E-10 | 2.1 | ZBED5-AS1 | 2.107142857 |
| RPS6KB1        | 3.37E-14 | 0.234585  | 0.139 | 0.09  | 8.12E-10 | 2.1 | RPS6KB1   | 1.544444444 |
| KIF16B         | 4.49E-14 | 0.3294068 | 0.242 | 0.182 | 1.08E-09 | 2.1 | KIF16B    | 1.32967033  |
| RP11-350N15.41 | 4.78E-14 | 0.1189454 | 0.038 | 0.015 | 1.15E-09 | 2.1 | RP11-350N | 2.533333333 |
| OSBP           | 6.53E-14 | 0.3502781 | 0.203 | 0.149 | 1.57E-09 | 2.1 | OSBP      | 1.362416107 |
| FGD6           | 7.12E-14 | 0.3958354 | 0.39  | 0.341 | 1.72E-09 | 2.1 | FGD6      | 1.143695015 |
| NFYA           | 7.88E-14 | 0.2238176 | 0.118 | 0.073 | 1.90E-09 | 2.1 | NFYA      | 1.616438356 |
| S100A141       | 8.84E-14 | 0.3161064 | 0.742 | 0.735 | 2.13E-09 | 2.1 | S100A14   | 1.00952381  |
| DCXR           | 8.88E-14 | 0.1137935 | 0.039 | 0.016 | 2.14E-09 | 2.1 | DCXR      | 2.4375      |
| SIDT2          | 9.08E-14 | 0.1601589 | 0.066 | 0.033 | 2.19E-09 | 2.1 | SIDT2     | 2           |
| GPD2           | 9.64E-14 | 0.3870357 | 0.378 | 0.328 | 2.33E-09 | 2.1 | GPD2      | 1.152439024 |
| CCNK           | 1.02E-13 | 0.3211357 | 0.196 | 0.142 | 2.46E-09 | 2.1 | CCNK      | 1.38028169  |
| ARFGEF2        | 1.10E-13 | 0.362712  | 0.41  | 0.37  | 2.64E-09 | 2.1 | ARFGEF2   | 1.108108108 |
| PPP2R5E        | 1.13E-13 | 0.4337636 | 0.335 | 0.287 | 2.73E-09 | 2.1 | PPP2R5E   | 1.167247387 |
| NEDD91         | 1.14E-13 | 0.3380999 | 0.426 | 0.368 | 2.74E-09 | 2.1 | NEDD9     | 1.157608696 |
| TMEM254        | 1.15E-13 | 0.1529591 | 0.077 | 0.041 | 2.77E-09 | 2.1 | TMEM254   | 1.87804878  |
| MARCH51        | 1.16E-13 | 0.2995846 | 0.284 | 0.224 | 2.80E-09 | 2.1 | MARCH5    | 1.267857143 |
| LSMEM1         | 1.28E-13 | 0.2299459 | 0.112 | 0.068 | 3.09E-09 | 2.1 | LSMEM1    | 1.647058824 |
| KDM3A1         | 1.36E-13 | 0.2901529 | 0.157 | 0.106 | 3.29E-09 | 2.1 | KDM3A     | 1.481132075 |
| MARK3          | 1.36E-13 | 0.2977907 | 0.502 | 0.467 | 3.29E-09 | 2.1 | MARK3     | 1.074946467 |
| CDR21          | 1.53E-13 | 0.3353285 | 0.225 | 0.17  | 3.69E-09 | 2.1 | CDR2      | 1.323529412 |
| PGRMC1         | 1.54E-13 | 0.2501352 | 0.128 | 0.082 | 3.72E-09 | 2.1 | PGRMC1    | 1.56097561  |
| HSPB8          | 1.62E-13 | 0.221269  | 0.117 | 0.072 | 3.90E-09 | 2.1 | HSPB8     | 1.625       |
| IL6ST          | 1.98E-13 | 0.3019881 | 0.382 | 0.33  | 4.78E-09 | 2.1 | IL6ST     | 1.157575758 |
| TMBIM6         | 2.20E-13 | 0.1262308 | 0.875 | 0.86  | 5.31E-09 | 2.1 | TMBIM6    | 1.01744186  |
| STX3           | 2.35E-13 | 0.2844159 | 0.189 | 0.136 | 5.66E-09 | 2.1 | STX3      | 1.389705882 |
| ACOT12         | 2.64E-13 | 0.1035628 | 0.027 | 0.009 | 6.36E-09 | 2.1 | ACOT12    | 3           |
| SPPL2A         | 2.88E-13 | 0.3172944 | 0.315 | 0.26  | 6.94E-09 | 2.1 | SPPL2A    | 1.211538462 |
| LUC7L3         | 2.96E-13 | 0.3348489 | 0.379 | 0.335 | 7.13E-09 | 2.1 | LUC7L3    | 1.131343284 |
| LMBR1          | 3.35E-13 | 0.3189235 | 0.196 | 0.144 | 8.08E-09 | 2.1 | LMBR1     | 1.361111111 |
| KLHDC10        | 3.45E-13 | 0.2879575 | 0.186 | 0.133 | 8.32E-09 | 2.1 | KLHDC10   | 1.398496241 |
| MARCH61        | 3.73E-13 | 0.2988542 | 0.442 | 0.398 | 8.99E-09 | 2.1 | MARCH6    | 1.110552764 |
| DHX15          | 4.92E-13 | 0.3216208 | 0.311 | 0.257 | 1.19E-08 | 2.1 | DHX15     | 1.210116732 |
| MTMR31         | 5.38E-13 | 0.3315004 | 0.249 | 0.196 | 1.30E-08 | 2.1 | MTMR3     | 1.270408163 |
| CLSTN2         | 6.26E-13 | 0.1883308 | 0.111 | 0.068 | 1.51E-08 | 2.1 | CLSTN2    | 1.632352941 |
| CTD-2060L22.1  | 6.26E-13 | 0.1606342 | 0.045 | 0.02  | 1.51E-08 | 2.1 | CTD-2060L | 2.25        |
| CAPN8          | 7.01E-13 | 0.1841075 | 0.283 | 0.214 | 1.69E-08 | 2.1 | CAPN8     | 1.322429907 |
| DGKH           | 7.39E-13 | 0.4177065 | 0.357 | 0.305 | 1.78E-08 | 2.1 | DGKH      | 1.170491803 |
| MBTD1          | 7.45E-13 | 0.3499971 | 0.237 | 0.185 | 1.80E-08 | 2.1 | MBTD1     | 1.281081081 |
| FAM222A        | 7.58E-13 | 0.1808702 | 0.075 | 0.041 | 1.83E-08 | 2.1 | FAM222A   | 1.829268293 |
| TRIP12         | 7.69E-13 | 0.3141053 | 0.372 | 0.325 | 1.85E-08 | 2.1 | TRIP12    | 1.144615385 |
| PCNX1          | 8.08E-13 | 0.3277765 | 0.258 | 0.205 | 1.95E-08 | 2.1 | PCNX      | 1.258536585 |
| ENPP1          | 8.28E-13 | 0.2692558 | 0.184 | 0.131 | 2.00E-08 | 2.1 | ENPP1     | 1.404580153 |
| ANKRD11        | 9.55E-13 | 0.2767953 | 0.37  | 0.317 | 2.30E-08 | 2.1 | ANKRD11   | 1.167192429 |
| CAND1          | 9.97E-13 | 0.3030379 | 0.208 | 0.156 | 2.40E-08 | 2.1 | CAND1     | 1.333333333 |
| KIF2A1         | 1.01E-12 | 0.3504967 | 0.232 | 0.182 | 2.43E-08 | 2.1 | KIF2A     | 1.274725275 |

|               |          |           |       |       |          |     |           |             |
|---------------|----------|-----------|-------|-------|----------|-----|-----------|-------------|
| DMXL1         | 1.02E-12 | 0.3238091 | 0.216 | 0.163 | 2.46E-08 | 2.1 | DMXL1     | 1.325153374 |
| GLO1          | 1.05E-12 | 0.318477  | 0.222 | 0.168 | 2.53E-08 | 2.1 | GLO1      | 1.321428571 |
| CUL3          | 1.06E-12 | 0.2904397 | 0.441 | 0.401 | 2.57E-08 | 2.1 | CUL3      | 1.099750623 |
| GLRX31        | 1.09E-12 | 0.2806621 | 0.169 | 0.119 | 2.62E-08 | 2.1 | GLRX3     | 1.420168067 |
| HELLS         | 1.15E-12 | 0.1724894 | 0.053 | 0.025 | 2.78E-08 | 2.1 | HELLS     | 2.12        |
| PKP41         | 1.16E-12 | 0.4030706 | 0.519 | 0.503 | 2.80E-08 | 2.1 | PKP4      | 1.031809145 |
| CRKL          | 1.18E-12 | 0.2279831 | 0.117 | 0.074 | 2.86E-08 | 2.1 | CRKL      | 1.581081081 |
| ATP6V1G1      | 1.33E-12 | 0.280833  | 0.431 | 0.387 | 3.21E-08 | 2.1 | ATP6V1G1  | 1.11369509  |
| ARHGEF21      | 1.48E-12 | 0.223103  | 0.125 | 0.08  | 3.57E-08 | 2.1 | ARHGEF2   | 1.5625      |
| RAB26         | 1.63E-12 | 0.1562448 | 0.066 | 0.034 | 3.93E-08 | 2.1 | RAB26     | 1.941176471 |
| MEAF61        | 1.72E-12 | 0.2881675 | 0.219 | 0.165 | 4.15E-08 | 2.1 | MEAF6     | 1.327272727 |
| ZC3HAV1       | 1.82E-12 | 0.3398705 | 0.237 | 0.185 | 4.39E-08 | 2.1 | ZC3HAV1   | 1.281081081 |
| GOLPH3L2      | 1.83E-12 | 0.317008  | 0.246 | 0.194 | 4.42E-08 | 2.1 | GOLPH3L   | 1.268041237 |
| ATF31         | 1.86E-12 | 0.2497798 | 0.456 | 0.403 | 4.49E-08 | 2.1 | ATF3      | 1.131513648 |
| EIF4G2        | 1.97E-12 | 0.2817826 | 0.434 | 0.39  | 4.75E-08 | 2.1 | EIF4G2    | 1.112820513 |
| TBC1D15       | 2.31E-12 | 0.3514249 | 0.358 | 0.317 | 5.58E-08 | 2.1 | TBC1D15   | 1.129337539 |
| KIAA0895      | 2.51E-12 | 0.1911674 | 0.086 | 0.049 | 6.05E-08 | 2.1 | KIAA0895  | 1.755102041 |
| TMEM106A      | 2.78E-12 | 0.2156358 | 0.092 | 0.055 | 6.71E-08 | 2.1 | TMEM106A  | 1.672727273 |
| RAB31         | 3.24E-12 | 0.3321443 | 0.241 | 0.187 | 7.80E-08 | 2.1 | RAB31     | 1.288770053 |
| ELOVL2        | 3.54E-12 | 0.1039726 | 0.026 | 0.009 | 8.54E-08 | 2.1 | ELOVL2    | 2.888888889 |
| RP11-384F7.2  | 3.75E-12 | 0.2015985 | 0.1   | 0.06  | 9.04E-08 | 2.1 | RP11-384F | 1.666666667 |
| DHRX          | 4.13E-12 | 0.3771466 | 0.322 | 0.274 | 9.96E-08 | 2.1 | DHRX      | 1.175182482 |
| ZNF385B       | 4.72E-12 | 0.2500352 | 0.041 | 0.018 | 1.14E-07 | 2.1 | ZNF385B   | 2.277777778 |
| OS9           | 4.97E-12 | 0.2431703 | 0.136 | 0.091 | 1.20E-07 | 2.1 | OS9       | 1.494505495 |
| GSTCD         | 5.18E-12 | 0.2892443 | 0.154 | 0.106 | 1.25E-07 | 2.1 | GSTCD     | 1.452830189 |
| GPR107        | 5.70E-12 | 0.3164089 | 0.199 | 0.151 | 1.37E-07 | 2.1 | GPR107    | 1.317880795 |
| CUL4A         | 5.80E-12 | 0.3144896 | 0.227 | 0.177 | 1.40E-07 | 2.1 | CUL4A     | 1.282485876 |
| CLK11         | 6.76E-12 | 0.3005739 | 0.452 | 0.415 | 1.63E-07 | 2.1 | CLK1      | 1.089156627 |
| LAMA1         | 6.87E-12 | 0.5874029 | 0.148 | 0.101 | 1.66E-07 | 2.1 | LAMA1     | 1.465346535 |
| RP11-131L23.1 | 6.91E-12 | 0.3436921 | 0.143 | 0.097 | 1.67E-07 | 2.1 | RP11-131L | 1.474226804 |
| OST4          | 7.11E-12 | 0.3147182 | 0.442 | 0.414 | 1.71E-07 | 2.1 | OST4      | 1.06763285  |
| BRIP1         | 7.79E-12 | 0.2264049 | 0.075 | 0.042 | 1.88E-07 | 2.1 | BRIP1     | 1.785714286 |
| MAP3K8        | 8.09E-12 | 0.3206042 | 0.348 | 0.297 | 1.95E-07 | 2.1 | MAP3K8    | 1.171717172 |
| PEBP1         | 8.60E-12 | 0.2752137 | 0.219 | 0.17  | 2.07E-07 | 2.1 | PEBP1     | 1.288235294 |
| BAG1          | 1.05E-11 | 0.2510625 | 0.141 | 0.096 | 2.53E-07 | 2.1 | BAG1      | 1.46875     |
| AEBP2         | 1.06E-11 | 0.3955972 | 0.301 | 0.255 | 2.55E-07 | 2.1 | AEBP2     | 1.180392157 |
| DGKI          | 1.11E-11 | 0.2134667 | 0.063 | 0.034 | 2.67E-07 | 2.1 | DGKI      | 1.852941176 |
| KCNAB1        | 1.17E-11 | 0.109827  | 0.034 | 0.014 | 2.81E-07 | 2.1 | KCNAB1    | 2.428571429 |
| BCOR          | 1.22E-11 | 0.1994042 | 0.582 | 0.507 | 2.94E-07 | 2.1 | BCOR      | 1.147928994 |
| ZBTB431       | 1.29E-11 | 0.3066654 | 0.226 | 0.176 | 3.12E-07 | 2.1 | ZBTB43    | 1.284090909 |
| UCHL3         | 1.43E-11 | 0.3046176 | 0.19  | 0.142 | 3.45E-07 | 2.1 | UCHL3     | 1.338028169 |
| DACH1         | 1.54E-11 | 0.2630181 | 0.139 | 0.094 | 3.72E-07 | 2.1 | DACH1     | 1.478723404 |
| SLK           | 1.62E-11 | 0.3004042 | 0.283 | 0.232 | 3.92E-07 | 2.1 | SLK       | 1.219827586 |
| TNFRSF19      | 1.84E-11 | 0.1711966 | 0.058 | 0.03  | 4.43E-07 | 2.1 | TNFRSF19  | 1.933333333 |
| IARS1         | 1.95E-11 | 0.3094159 | 0.179 | 0.131 | 4.70E-07 | 2.1 | IARS      | 1.366412214 |
| SLC17A5       | 1.97E-11 | 0.2549756 | 0.137 | 0.094 | 4.75E-07 | 2.1 | SLC17A5   | 1.457446809 |
| DERA          | 2.12E-11 | 0.2348274 | 0.105 | 0.067 | 5.11E-07 | 2.1 | DERA      | 1.567164179 |
| ITPR1         | 2.13E-11 | 0.2526327 | 0.144 | 0.099 | 5.13E-07 | 2.1 | ITPR1     | 1.454545455 |
| TMED7-TICAM2  | 2.42E-11 | 0.1757197 | 0.081 | 0.047 | 5.83E-07 | 2.1 | TMED7-TIC | 1.723404255 |
| TNKS1         | 2.78E-11 | 0.3414385 | 0.327 | 0.283 | 6.70E-07 | 2.1 | TNKS      | 1.155477032 |
| RAI2          | 3.00E-11 | 0.1455959 | 0.048 | 0.023 | 7.23E-07 | 2.1 | RAI2      | 2.086956522 |
| TTC33         | 3.07E-11 | 0.223195  | 0.107 | 0.069 | 7.41E-07 | 2.1 | TTC33     | 1.550724638 |

|               |          |           |       |       |          |     |           |             |
|---------------|----------|-----------|-------|-------|----------|-----|-----------|-------------|
| MSMO1         | 3.15E-11 | 0.2613163 | 0.383 | 0.33  | 7.59E-07 | 2.1 | MSMO1     | 1.160606061 |
| COG3          | 3.36E-11 | 0.2442323 | 0.108 | 0.069 | 8.10E-07 | 2.1 | COG3      | 1.565217391 |
| MTUS11        | 3.46E-11 | 0.3452457 | 0.412 | 0.376 | 8.35E-07 | 2.1 | MTUS1     | 1.095744681 |
| CAB39         | 3.55E-11 | 0.2856275 | 0.404 | 0.359 | 8.57E-07 | 2.1 | CAB39     | 1.125348189 |
| CHEK1         | 3.57E-11 | 0.1203361 | 0.029 | 0.011 | 8.62E-07 | 2.1 | CHEK1     | 2.636363636 |
| RP11-302B13.5 | 3.79E-11 | 0.1150627 | 0.038 | 0.017 | 9.15E-07 | 2.1 | RP11-302B | 2.235294118 |
| RP11-166B2.8  | 3.80E-11 | 0.2286954 | 0.097 | 0.061 | 9.15E-07 | 2.1 | RP11-166B | 1.590163934 |
| PGRMC2        | 3.98E-11 | 0.2655455 | 0.172 | 0.126 | 9.59E-07 | 2.1 | PGRMC2    | 1.365079365 |
| NEB           | 3.99E-11 | 0.1901277 | 0.076 | 0.044 | 9.63E-07 | 2.1 | NEB       | 1.727272727 |
| BATF          | 4.30E-11 | 0.2266486 | 0.111 | 0.071 | 1.04E-06 | 2.1 | BATF      | 1.563380282 |
| P4HA3         | 4.45E-11 | 0.1592355 | 0.062 | 0.033 | 1.07E-06 | 2.1 | P4HA3     | 1.878787879 |
| SNX1          | 4.52E-11 | 0.3017571 | 0.206 | 0.159 | 1.09E-06 | 2.1 | SNX1      | 1.295597484 |
| SPTAN1        | 4.56E-11 | 0.2869991 | 0.267 | 0.219 | 1.10E-06 | 2.1 | SPTAN1    | 1.219178082 |
| GRB10         | 4.91E-11 | 0.3588433 | 0.227 | 0.179 | 1.18E-06 | 2.1 | GRB10     | 1.268156425 |
| RNF1691       | 5.10E-11 | 0.3353629 | 0.305 | 0.261 | 1.23E-06 | 2.1 | RNF169    | 1.168582375 |
| ATP13A4       | 5.64E-11 | 0.1316818 | 0.061 | 0.032 | 1.36E-06 | 2.1 | ATP13A4   | 1.90625     |
| GLCC11        | 5.92E-11 | 0.1575183 | 0.364 | 0.297 | 1.43E-06 | 2.1 | GLCC11    | 1.225589226 |
| PKD1L3        | 6.65E-11 | 0.1443952 | 0.059 | 0.032 | 1.60E-06 | 2.1 | PKD1L3    | 1.84375     |
| PMEPA1        | 6.73E-11 | 0.191232  | 0.094 | 0.058 | 1.62E-06 | 2.1 | PMEPA1    | 1.620689655 |
| NCOR1         | 7.19E-11 | 0.3000607 | 0.447 | 0.422 | 1.73E-06 | 2.1 | NCOR1     | 1.059241706 |
| FAM208B       | 7.38E-11 | 0.3140124 | 0.279 | 0.233 | 1.78E-06 | 2.1 | FAM208B   | 1.197424893 |
| ATP6V1C1      | 8.26E-11 | 0.3250534 | 0.174 | 0.13  | 1.99E-06 | 2.1 | ATP6V1C1  | 1.338461538 |
| PABPC1L       | 8.35E-11 | 0.1220357 | 0.037 | 0.017 | 2.01E-06 | 2.1 | PABPC1L   | 2.176470588 |
| VEGFA         | 8.39E-11 | 0.3286002 | 0.277 | 0.226 | 2.02E-06 | 2.1 | VEGFA     | 1.225663717 |
| RHOV          | 8.69E-11 | 0.2322523 | 0.078 | 0.047 | 2.09E-06 | 2.1 | RHOV      | 1.659574468 |
| PCM1          | 9.48E-11 | 0.3362723 | 0.299 | 0.256 | 2.29E-06 | 2.1 | PCM1      | 1.16796875  |
| KDM5B1        | 1.01E-10 | 0.2338847 | 0.563 | 0.544 | 2.43E-06 | 2.1 | KDM5B     | 1.034926471 |
| RP11-12M5.4   | 1.04E-10 | 0.1245133 | 0.036 | 0.016 | 2.52E-06 | 2.1 | RP11-12M5 | 2.25        |
| THSD4         | 1.06E-10 | 0.2216568 | 0.602 | 0.56  | 2.56E-06 | 2.1 | THSD4     | 1.075       |
| FNDC3A        | 1.08E-10 | 0.3182881 | 0.403 | 0.368 | 2.61E-06 | 2.1 | FNDC3A    | 1.095108696 |
| COQ3          | 1.08E-10 | 0.1323532 | 0.045 | 0.022 | 2.61E-06 | 2.1 | COQ3      | 2.045454545 |
| CTC-490E21.12 | 1.10E-10 | 0.2416094 | 0.089 | 0.055 | 2.64E-06 | 2.1 | CTC-490E2 | 1.618181818 |
| ADAMTS4       | 1.15E-10 | 0.1737308 | 0.082 | 0.049 | 2.77E-06 | 2.1 | ADAMTS4   | 1.673469388 |
| RP11-295K2.3  | 1.18E-10 | 0.1034364 | 0.034 | 0.015 | 2.84E-06 | 2.1 | RP11-295K | 2.266666667 |
| USF3          | 1.19E-10 | 0.2411863 | 0.103 | 0.066 | 2.87E-06 | 2.1 | USF3      | 1.560606061 |
| ENOX1         | 1.19E-10 | 0.3522229 | 0.184 | 0.136 | 2.87E-06 | 2.1 | ENOX1     | 1.352941176 |
| YAP1          | 1.22E-10 | 0.2722605 | 0.545 | 0.535 | 2.95E-06 | 2.1 | YAP1      | 1.018691589 |
| RNF4          | 1.27E-10 | 0.2763314 | 0.211 | 0.164 | 3.06E-06 | 2.1 | RNF4      | 1.286585366 |
| ZNF428        | 1.28E-10 | 0.1457934 | 0.039 | 0.018 | 3.08E-06 | 2.1 | ZNF428    | 2.166666667 |
| VAV3          | 1.49E-10 | 0.2419425 | 0.337 | 0.283 | 3.60E-06 | 2.1 | VAV3      | 1.190812721 |
| PNP           | 1.60E-10 | 0.2487617 | 0.117 | 0.078 | 3.87E-06 | 2.1 | PNP       | 1.5         |
| ITGA10        | 1.73E-10 | 0.1785051 | 0.085 | 0.051 | 4.17E-06 | 2.1 | ITGA10    | 1.666666667 |
| MYB           | 1.75E-10 | 0.1163358 | 0.043 | 0.021 | 4.21E-06 | 2.1 | MYB       | 2.047619048 |
| EPT1          | 1.82E-10 | 0.2102163 | 0.135 | 0.093 | 4.38E-06 | 2.1 | EPT1      | 1.451612903 |
| SIAH2         | 1.84E-10 | 0.1807693 | 0.113 | 0.075 | 4.44E-06 | 2.1 | SIAH2     | 1.506666667 |
| SAP130        | 1.91E-10 | 0.2300864 | 0.123 | 0.084 | 4.61E-06 | 2.1 | SAP130    | 1.464285714 |
| AC073218.1    | 1.95E-10 | 0.2461118 | 0.127 | 0.086 | 4.70E-06 | 2.1 | AC073218  | 1.476744186 |
| DCP1A         | 1.96E-10 | 0.315926  | 0.3   | 0.261 | 4.74E-06 | 2.1 | DCP1A     | 1.149425287 |
| CHAF1B1       | 2.04E-10 | 0.180274  | 0.061 | 0.033 | 4.92E-06 | 2.1 | CHAF1B    | 1.848484848 |
| TMEM254-AS1   | 2.12E-10 | 0.1257067 | 0.045 | 0.022 | 5.10E-06 | 2.1 | TMEM254   | 2.045454545 |
| ANKFY1        | 2.23E-10 | 0.2491138 | 0.115 | 0.078 | 5.38E-06 | 2.1 | ANKFY1    | 1.474358974 |
| OGT1          | 2.75E-10 | 0.2919968 | 0.431 | 0.402 | 6.64E-06 | 2.1 | OGT       | 1.072139303 |

|               |          |           |       |       |          |     |           |             |
|---------------|----------|-----------|-------|-------|----------|-----|-----------|-------------|
| CA21          | 2.77E-10 | 0.2720557 | 0.13  | 0.089 | 6.68E-06 | 2.1 | CA2       | 1.460674157 |
| LINC00862     | 2.79E-10 | 0.1799245 | 0.067 | 0.038 | 6.73E-06 | 2.1 | LINC00862 | 1.763157895 |
| F3            | 3.48E-10 | 0.2239629 | 0.152 | 0.108 | 8.38E-06 | 2.1 | F3        | 1.407407407 |
| GNB1          | 3.54E-10 | 0.2784963 | 0.38  | 0.343 | 8.52E-06 | 2.1 | GNB1      | 1.10787172  |
| EDEM3         | 3.56E-10 | 0.248612  | 0.125 | 0.086 | 8.59E-06 | 2.1 | EDEM3     | 1.453488372 |
| CDC73         | 3.85E-10 | 0.312059  | 0.229 | 0.184 | 9.28E-06 | 2.1 | CDC73     | 1.244565217 |
| WHSC1L1       | 3.97E-10 | 0.3006333 | 0.301 | 0.258 | 9.57E-06 | 2.1 | WHSC1L1   | 1.166666667 |
| VAPA1         | 4.24E-10 | 0.2703056 | 0.488 | 0.474 | 1.02E-05 | 2.1 | VAPA      | 1.029535865 |
| MAPK6         | 4.41E-10 | 0.2808767 | 0.315 | 0.27  | 1.06E-05 | 2.1 | MAPK6     | 1.166666667 |
| PMP22         | 4.60E-10 | 0.1378213 | 0.044 | 0.021 | 1.11E-05 | 2.1 | PMP22     | 2.095238095 |
| UQCRB1        | 5.07E-10 | 0.1667718 | 0.796 | 0.807 | 1.22E-05 | 2.1 | UQCRB     | 0.986369269 |
| ZCCHC61       | 5.34E-10 | 0.2970631 | 0.373 | 0.338 | 1.29E-05 | 2.1 | ZCCHC6    | 1.103550296 |
| UVRAG1        | 5.40E-10 | 0.3059946 | 0.485 | 0.465 | 1.30E-05 | 2.1 | UVRAG     | 1.043010753 |
| RALY          | 5.48E-10 | 0.2728702 | 0.223 | 0.178 | 1.32E-05 | 2.1 | RALY      | 1.252808989 |
| HNRNPAO       | 5.51E-10 | 0.2472719 | 0.134 | 0.095 | 1.33E-05 | 2.1 | HNRNPAO   | 1.410526316 |
| LIN52         | 5.80E-10 | 0.2243562 | 0.095 | 0.061 | 1.40E-05 | 2.1 | LIN52     | 1.557377049 |
| ZFAND5        | 5.80E-10 | 0.2673074 | 0.464 | 0.433 | 1.40E-05 | 2.1 | ZFAND5    | 1.071593533 |
| PHEX          | 5.83E-10 | 0.1436829 | 0.042 | 0.02  | 1.41E-05 | 2.1 | PHEX      | 2.1         |
| RP11-371F15.3 | 6.17E-10 | 0.2400493 | 0.122 | 0.083 | 1.49E-05 | 2.1 | RP11-371F | 1.469879518 |
| MED15         | 6.63E-10 | 0.2969875 | 0.213 | 0.169 | 1.60E-05 | 2.1 | MED15     | 1.26035503  |
| RSPRY1        | 7.67E-10 | 0.2301535 | 0.15  | 0.108 | 1.85E-05 | 2.1 | RSPRY1    | 1.388888889 |
| MAL2          | 7.77E-10 | 0.2334807 | 0.398 | 0.351 | 1.87E-05 | 2.1 | MAL2      | 1.133903134 |
| TTLL5         | 8.33E-10 | 0.3322667 | 0.323 | 0.281 | 2.01E-05 | 2.1 | TTLL5     | 1.149466192 |
| MYO10         | 8.63E-10 | 0.3311147 | 0.294 | 0.251 | 2.08E-05 | 2.1 | MYO10     | 1.171314741 |
| DDR1          | 8.78E-10 | 0.3123066 | 0.258 | 0.213 | 2.12E-05 | 2.1 | DDR1      | 1.211267606 |
| MAP7          | 8.91E-10 | 0.3442404 | 0.39  | 0.358 | 2.15E-05 | 2.1 | MAP7      | 1.089385475 |
| BCL3          | 9.01E-10 | 0.2250023 | 0.141 | 0.1   | 2.17E-05 | 2.1 | BCL3      | 1.41        |
| DOCK111       | 9.25E-10 | 0.1372532 | 0.048 | 0.025 | 2.23E-05 | 2.1 | DOCK11    | 1.92        |
| TNIP1         | 1.01E-09 | 0.257001  | 0.255 | 0.209 | 2.44E-05 | 2.1 | TNIP1     | 1.220095694 |
| RP11-644C3.1  | 1.07E-09 | 0.2242722 | 0.07  | 0.041 | 2.59E-05 | 2.1 | RP11-644C | 1.707317073 |
| SDCBP2-AS1    | 1.07E-09 | 0.2447156 | 0.097 | 0.063 | 2.59E-05 | 2.1 | SDCBP2-AS | 1.53968254  |
| RCL1          | 1.08E-09 | 0.1880917 | 0.103 | 0.067 | 2.60E-05 | 2.1 | RCL1      | 1.537313433 |
| AC018816.3    | 1.19E-09 | 0.2380528 | 0.137 | 0.096 | 2.88E-05 | 2.1 | AC018816  | 1.427083333 |
| CCNI          | 1.28E-09 | 0.2249959 | 0.636 | 0.628 | 3.08E-05 | 2.1 | CCNI      | 1.012738854 |
| USP152        | 1.28E-09 | 0.3336971 | 0.363 | 0.33  | 3.09E-05 | 2.1 | USP15     | 1.1         |
| MYOM1         | 1.29E-09 | 0.264614  | 0.077 | 0.047 | 3.11E-05 | 2.1 | MYOM1     | 1.638297872 |
| PLAT          | 1.30E-09 | 0.249493  | 0.124 | 0.085 | 3.14E-05 | 2.1 | PLAT      | 1.458823529 |
| TWSG1         | 1.31E-09 | 0.1785388 | 0.117 | 0.079 | 3.17E-05 | 2.1 | TWSG1     | 1.481012658 |
| ITPR3         | 1.40E-09 | 0.2010347 | 0.112 | 0.076 | 3.36E-05 | 2.1 | ITPR3     | 1.473684211 |
| C14orf37      | 1.42E-09 | 0.2785859 | 0.142 | 0.103 | 3.43E-05 | 2.1 | C14orf37  | 1.378640777 |
| NUP210L       | 1.58E-09 | 0.1465844 | 0.056 | 0.031 | 3.82E-05 | 2.1 | NUP210L   | 1.806451613 |
| MAP2K4        | 1.60E-09 | 0.2244585 | 0.48  | 0.441 | 3.85E-05 | 2.1 | MAP2K4    | 1.088435374 |
| ATF4          | 1.61E-09 | 0.3005081 | 0.425 | 0.395 | 3.89E-05 | 2.1 | ATF4      | 1.075949367 |
| PXN           | 1.75E-09 | 0.2129654 | 0.131 | 0.092 | 4.22E-05 | 2.1 | PXN       | 1.423913043 |
| AGAP3         | 1.76E-09 | 0.1804981 | 0.086 | 0.054 | 4.25E-05 | 2.1 | AGAP3     | 1.592592593 |
| TNC           | 1.96E-09 | 0.2384192 | 0.388 | 0.328 | 4.72E-05 | 2.1 | TNC       | 1.182926829 |
| CCDC181       | 1.99E-09 | 0.1110049 | 0.033 | 0.015 | 4.80E-05 | 2.1 | CCDC181   | 2.2         |
| RCAN32        | 2.33E-09 | 0.2219747 | 0.132 | 0.197 | 5.62E-05 | 2.1 | RCAN3     | 0.670050761 |
| PHF20         | 2.35E-09 | 0.2924545 | 0.384 | 0.355 | 5.67E-05 | 2.1 | PHF20     | 1.081690141 |
| IKBKB         | 2.37E-09 | 0.3074374 | 0.205 | 0.163 | 5.70E-05 | 2.1 | IKBKB     | 1.257668712 |
| DCAF5         | 2.45E-09 | 0.2959775 | 0.185 | 0.143 | 5.91E-05 | 2.1 | DCAF5     | 1.293706294 |
| PFKFB41       | 2.63E-09 | 0.1355885 | 0.065 | 0.037 | 6.34E-05 | 2.1 | PFKFB4    | 1.756756757 |

|               |          |           |       |       |             |     |            |             |
|---------------|----------|-----------|-------|-------|-------------|-----|------------|-------------|
| TIMM17A2      | 2.64E-09 | 0.3467193 | 0.256 | 0.218 | 6.36E-05    | 2.1 | TIMM17A    | 1.174311927 |
| CDC14A        | 2.86E-09 | 0.270527  | 0.203 | 0.158 | 6.90E-05    | 2.1 | CDC14A     | 1.284810127 |
| C9orf24       | 3.18E-09 | 0.1250214 | 0.037 | 0.018 | 7.68E-05    | 2.1 | C9orf24    | 2.055555556 |
| ABCC1         | 3.19E-09 | 0.2478615 | 0.14  | 0.101 | 7.69E-05    | 2.1 | ABCC1      | 1.386138614 |
| ATG101        | 3.32E-09 | 0.1154696 | 0.054 | 0.03  | 8.01E-05    | 2.1 | ATG101     | 1.8         |
| AKAP17A       | 3.42E-09 | 0.1375323 | 0.064 | 0.037 | 8.25E-05    | 2.1 | AKAP17A    | 1.72972973  |
| RAB32         | 3.64E-09 | 0.1967134 | 0.13  | 0.092 | 8.79E-05    | 2.1 | RAB32      | 1.413043478 |
| SLC9A71       | 3.70E-09 | 0.2704732 | 0.321 | 0.28  | 8.93E-05    | 2.1 | SLC9A7     | 1.146428571 |
| JAK1          | 3.93E-09 | 0.2667986 | 0.437 | 0.406 | 9.47E-05    | 2.1 | JAK1       | 1.07635468  |
| HCG171        | 3.98E-09 | 0.2337648 | 0.095 | 0.063 | 9.59E-05    | 2.1 | HCG17      | 1.507936508 |
| ASH1L         | 4.06E-09 | 0.2641393 | 0.562 | 0.551 | 9.79E-05    | 2.1 | ASH1L      | 1.019963702 |
| COX6B1        | 4.08E-09 | 0.186404  | 0.739 | 0.763 | 9.84E-05    | 2.1 | COX6B1     | 0.968545216 |
| OSTC2         | 4.15E-09 | 0.2968441 | 0.471 | 0.458 | 0.00010018  | 2.1 | OSTC       | 1.028384279 |
| MCF2          | 4.32E-09 | 0.1303471 | 0.045 | 0.023 | 0.000104225 | 2.1 | MCF2       | 1.956521739 |
| SH3KBP1       | 4.33E-09 | 0.2097604 | 0.142 | 0.101 | 0.000104398 | 2.1 | SH3KBP1    | 1.405940594 |
| PTGER3        | 4.87E-09 | 0.2034204 | 0.065 | 0.038 | 0.000117534 | 2.1 | PTGER3     | 1.710526316 |
| CASZ1         | 4.99E-09 | 0.2215271 | 0.133 | 0.095 | 0.000120262 | 2.1 | CASZ1      | 1.4         |
| SNIP11        | 5.21E-09 | 0.1522057 | 0.073 | 0.044 | 0.00012571  | 2.1 | SNIP1      | 1.659090909 |
| RP11-37N22.1  | 5.57E-09 | 0.1500211 | 0.058 | 0.033 | 0.000134203 | 2.1 | RP11-37N2  | 1.757575758 |
| SP3           | 5.59E-09 | 0.2801563 | 0.253 | 0.211 | 0.000134831 | 2.1 | SP3        | 1.199052133 |
| RP11-347P5.1  | 6.46E-09 | 0.1851989 | 0.072 | 0.044 | 0.000155826 | 2.1 | RP11-347P  | 1.636363636 |
| NFXL11        | 6.72E-09 | 0.2200757 | 0.089 | 0.058 | 0.00016214  | 2.1 | NFXL1      | 1.534482759 |
| AC104667.3    | 6.79E-09 | 0.1221624 | 0.031 | 0.014 | 0.000163673 | 2.1 | AC104667.  | 2.214285714 |
| SAFB          | 6.79E-09 | 0.203733  | 0.108 | 0.073 | 0.00016383  | 2.1 | SAFB       | 1.479452055 |
| RP11-813I20.2 | 6.96E-09 | 0.1275529 | 0.043 | 0.022 | 0.000167868 | 2.1 | RP11-813I2 | 1.954545455 |
| NBAS          | 7.13E-09 | 0.3278311 | 0.187 | 0.147 | 0.000171958 | 2.1 | NBAS       | 1.272108844 |
| AVIL1         | 7.38E-09 | 0.2178821 | 0.09  | 0.059 | 0.000177873 | 2.1 | AVIL       | 1.525423729 |
| PSD3          | 7.90E-09 | 0.4268631 | 0.375 | 0.345 | 0.000190528 | 2.1 | PSD3       | 1.086956522 |
| RND31         | 8.61E-09 | 0.2755602 | 0.386 | 0.349 | 0.000207587 | 2.1 | RND3       | 1.106017192 |
| UQCC2         | 8.76E-09 | 0.1496374 | 0.082 | 0.052 | 0.000211279 | 2.1 | UQCC2      | 1.576923077 |
| UBL3          | 8.84E-09 | 0.2804545 | 0.242 | 0.2   | 0.000213263 | 2.1 | UBL3       | 1.21        |
| GGNBP2        | 9.42E-09 | 0.2892841 | 0.265 | 0.227 | 0.000227173 | 2.1 | GGNBP2     | 1.167400881 |
| MEX3D         | 1.03E-08 | 0.1275593 | 0.057 | 0.033 | 0.000248599 | 2.1 | MEX3D      | 1.727272727 |
| ARID4A1       | 1.06E-08 | 0.2386162 | 0.228 | 0.185 | 0.000254648 | 2.1 | ARID4A     | 1.232432432 |
| SRGAP1        | 1.09E-08 | 0.3835696 | 0.391 | 0.365 | 0.000263457 | 2.1 | SRGAP1     | 1.071232877 |
| TANC1         | 1.10E-08 | 0.3427713 | 0.375 | 0.348 | 0.000265355 | 2.1 | TANC1      | 1.077586207 |
| CANX          | 1.20E-08 | 0.2731731 | 0.37  | 0.337 | 0.000289077 | 2.1 | CANX       | 1.097922849 |
| GATAD2A       | 1.28E-08 | 0.3111232 | 0.19  | 0.15  | 0.000308859 | 2.1 | GATAD2A    | 1.266666667 |
| ALDH6A1       | 1.31E-08 | 0.1063418 | 0.05  | 0.027 | 0.000316155 | 2.1 | ALDH6A1    | 1.851851852 |
| FHL2          | 1.32E-08 | 0.2520941 | 0.212 | 0.17  | 0.000317585 | 2.1 | FHL2       | 1.247058824 |
| LINGO11       | 1.32E-08 | 0.1769684 | 0.889 | 0.89  | 0.00031765  | 2.1 | LINGO1     | 0.998876404 |
| MACC11        | 1.34E-08 | 0.2059981 | 0.449 | 0.411 | 0.000322619 | 2.1 | MACC1      | 1.092457421 |
| RAB2A         | 1.36E-08 | 0.2922244 | 0.343 | 0.311 | 0.000327448 | 2.1 | RAB2A      | 1.102893891 |
| ARHGAP30      | 1.42E-08 | 0.141532  | 0.048 | 0.026 | 0.000342439 | 2.1 | ARHGAP30   | 1.846153846 |
| CDK7          | 1.44E-08 | 0.2658513 | 0.154 | 0.117 | 0.00034651  | 2.1 | CDK7       | 1.316239316 |
| UBE2I         | 1.44E-08 | 0.2222606 | 0.16  | 0.121 | 0.000347873 | 2.1 | UBE2I      | 1.32231405  |
| MLIP          | 1.53E-08 | 0.114907  | 0.031 | 0.014 | 0.000368546 | 2.1 | MLIP       | 2.214285714 |
| ITM2B         | 1.60E-08 | 0.2648043 | 0.378 | 0.349 | 0.000384756 | 2.1 | ITM2B      | 1.083094556 |
| GABPB1        | 1.60E-08 | 0.2824183 | 0.153 | 0.116 | 0.000385021 | 2.1 | GABPB1     | 1.318965517 |
| CACNA2D1      | 1.70E-08 | 0.2466936 | 0.199 | 0.154 | 0.000408729 | 2.1 | CACNA2D1   | 1.292207792 |
| TBL1XR1       | 1.73E-08 | 0.1911988 | 0.597 | 0.582 | 0.000417931 | 2.1 | TBL1XR1    | 1.025773196 |
| FAM222A-AS1   | 1.93E-08 | 0.1426794 | 0.052 | 0.029 | 0.000465402 | 2.1 | FAM222A-   | 1.793103448 |



|               |          |           |       |       |             |     |           |             |
|---------------|----------|-----------|-------|-------|-------------|-----|-----------|-------------|
| RRAGC         | 2.01E-08 | 0.182464  | 0.109 | 0.075 | 0.0004845   | 2.1 | RRAGC     | 1.453333333 |
| STRN3         | 2.03E-08 | 0.2827998 | 0.348 | 0.316 | 0.000488496 | 2.1 | STRN3     | 1.101265823 |
| TTC34         | 2.24E-08 | 0.3127992 | 0.336 | 0.303 | 0.000540476 | 2.1 | TTC3      | 1.108910891 |
| RP11-148B18.1 | 2.34E-08 | 0.2303119 | 0.072 | 0.045 | 0.000564603 | 2.1 | RP11-148B | 1.6         |
| ADGRV1        | 2.42E-08 | 0.3387931 | 0.202 | 0.163 | 0.000583376 | 2.1 | ADGRV1    | 1.239263804 |
| CD109         | 2.52E-08 | 0.1327194 | 0.05  | 0.028 | 0.000608764 | 2.1 | CD109     | 1.785714286 |
| GDE1          | 2.55E-08 | 0.2268711 | 0.182 | 0.142 | 0.00061401  | 2.1 | GDE1      | 1.281690141 |
| RPS293        | 2.55E-08 | 0.1514752 | 0.9   | 0.927 | 0.000615405 | 2.1 | RPS29     | 0.970873786 |
| MBD21         | 2.84E-08 | 0.298849  | 0.338 | 0.306 | 0.000685627 | 2.1 | MBD2      | 1.104575163 |
| ASAH1         | 2.95E-08 | 0.2004198 | 0.136 | 0.099 | 0.000710837 | 2.1 | ASAH1     | 1.373737374 |
| IRS1          | 3.04E-08 | 0.169964  | 0.13  | 0.093 | 0.000732251 | 2.1 | IRS1      | 1.397849462 |
| MTF22         | 3.11E-08 | 0.2866848 | 0.247 | 0.209 | 0.000749901 | 2.1 | MTF2      | 1.181818182 |
| RYR2          | 3.17E-08 | 0.209902  | 0.155 | 0.116 | 0.000765145 | 2.1 | RYR2      | 1.336206897 |
| COX7C1        | 3.34E-08 | 0.1391318 | 0.856 | 0.875 | 0.000804792 | 2.1 | COX7C     | 0.978285714 |
| SHOC2         | 3.47E-08 | 0.2826419 | 0.293 | 0.258 | 0.000837371 | 2.1 | SHOC2     | 1.135658915 |
| NOTCH2        | 3.66E-08 | 0.2894547 | 0.275 | 0.237 | 0.000882912 | 2.1 | NOTCH2    | 1.160337553 |
| ARHGAP32      | 3.70E-08 | 0.2509042 | 0.443 | 0.415 | 0.000891794 | 2.1 | ARHGAP32  | 1.06746988  |
| PLSCR21       | 4.09E-08 | 0.2214952 | 0.086 | 0.057 | 0.000985835 | 2.1 | PLSCR2    | 1.50877193  |
| WSB1          | 4.18E-08 | 0.4241794 | 0.411 | 0.39  | 0.001007602 | 2.1 | WSB1      | 1.053846154 |
| GIGYF2        | 4.25E-08 | 0.282781  | 0.323 | 0.292 | 0.00102486  | 2.1 | GIGYF2    | 1.106164384 |
| BOD1L1        | 4.32E-08 | 0.2648125 | 0.176 | 0.14  | 0.001040878 | 2.1 | BOD1L1    | 1.257142857 |
| ACTB1         | 4.61E-08 | 0.2668724 | 0.653 | 0.643 | 0.001111535 | 2.1 | ACTB      | 1.0155521   |
| MTCL1         | 4.65E-08 | 0.1685425 | 0.081 | 0.053 | 0.001122276 | 2.1 | MTCL1     | 1.528301887 |
| IST1          | 4.73E-08 | 0.2582158 | 0.359 | 0.329 | 0.001141166 | 2.1 | IST1      | 1.09118541  |
| RIOK31        | 4.77E-08 | 0.2658339 | 0.303 | 0.266 | 0.001149247 | 2.1 | RIOK3     | 1.139097744 |
| UBAP11        | 4.86E-08 | 0.2608212 | 0.354 | 0.32  | 0.001171918 | 2.1 | UBAP1     | 1.10625     |
| ABHD3         | 4.92E-08 | 0.3840725 | 0.209 | 0.172 | 0.001186942 | 2.1 | ABHD3     | 1.215116279 |
| PIP5K1A1      | 5.01E-08 | 0.2680112 | 0.334 | 0.301 | 0.001207228 | 2.1 | PIP5K1A   | 1.109634551 |
| MCCC2         | 5.04E-08 | 0.2469396 | 0.194 | 0.156 | 0.001215535 | 2.1 | MCCC2     | 1.243589744 |
| MAN1A1        | 5.13E-08 | 0.2778612 | 0.266 | 0.226 | 0.001237722 | 2.1 | MAN1A1    | 1.17699115  |
| H2AFY         | 5.26E-08 | 0.2502449 | 0.184 | 0.146 | 0.001269337 | 2.1 | H2AFY     | 1.260273973 |
| LINC00504     | 5.34E-08 | 0.1540706 | 0.124 | 0.087 | 0.001288152 | 2.1 | LINC00504 | 1.425287356 |
| ACSL3         | 5.62E-08 | 0.2654279 | 0.369 | 0.335 | 0.001354431 | 2.1 | ACSL3     | 1.101492537 |
| PPFIA2        | 5.97E-08 | 0.1315734 | 0.061 | 0.036 | 0.001438694 | 2.1 | PPFIA2    | 1.694444444 |
| COCH          | 6.28E-08 | 0.2146603 | 0.156 | 0.12  | 0.001514754 | 2.1 | COCH      | 1.3         |
| HBP1          | 6.30E-08 | 0.2527047 | 0.296 | 0.26  | 0.001518222 | 2.1 | HBP1      | 1.138461538 |
| MYLIP         | 6.47E-08 | 0.1747443 | 0.125 | 0.09  | 0.001560291 | 2.1 | MYLIP     | 1.388888889 |
| GLRX5         | 6.83E-08 | 0.1449695 | 0.056 | 0.033 | 0.00164598  | 2.1 | GLRX5     | 1.696969697 |
| CXCL1         | 7.17E-08 | 0.3566616 | 0.307 | 0.268 | 0.001728127 | 2.1 | CXCL1     | 1.145522388 |
| GNA131        | 7.37E-08 | 0.2405932 | 0.246 | 0.206 | 0.001776711 | 2.1 | GNA13     | 1.194174757 |
| RP11-665G4.1  | 7.51E-08 | 0.2037534 | 0.121 | 0.087 | 0.001810171 | 2.1 | RP11-665G | 1.390804598 |
| RP3-331H24.5  | 7.90E-08 | 0.1613976 | 0.053 | 0.031 | 0.001904559 | 2.1 | RP3-331H2 | 1.709677419 |
| TUFT11        | 7.91E-08 | 0.2806571 | 0.218 | 0.181 | 0.001906704 | 2.1 | TUFT1     | 1.20441989  |
| LRRC59        | 8.66E-08 | 0.168021  | 0.097 | 0.067 | 0.002088232 | 2.1 | LRRC59    | 1.447761194 |
| RP11-241G9.31 | 8.92E-08 | 0.1579879 | 0.066 | 0.041 | 0.00215177  | 2.1 | RP11-241G | 1.609756098 |
| HERC31        | 8.98E-08 | 0.3316273 | 0.192 | 0.157 | 0.002165774 | 2.1 | HERC3     | 1.222929936 |
| ANXA5         | 9.07E-08 | 0.1972817 | 0.401 | 0.363 | 0.002186228 | 2.1 | ANXA5     | 1.104683196 |
| ZC3H12A       | 9.67E-08 | 0.1941916 | 0.096 | 0.066 | 0.002331763 | 2.1 | ZC3H12A   | 1.454545455 |
| VCPIP1        | 1.05E-07 | 0.1699193 | 0.083 | 0.055 | 0.002539938 | 2.1 | VCPIP1    | 1.509090909 |
| TMED9         | 1.10E-07 | 0.1959663 | 0.133 | 0.099 | 0.002658242 | 2.1 | TMED9     | 1.343434343 |
| MXI1          | 1.12E-07 | 0.2772264 | 0.227 | 0.19  | 0.002711324 | 2.1 | MXI1      | 1.194736842 |
| MAGT11        | 1.17E-07 | 0.2392735 | 0.215 | 0.177 | 0.002827078 | 2.1 | MAGT1     | 1.214689266 |

|                 |          |           |       |       |             |     |           |             |
|-----------------|----------|-----------|-------|-------|-------------|-----|-----------|-------------|
| NPC12           | 1.17E-07 | 0.2744958 | 0.347 | 0.316 | 0.002827505 | 2.1 | NPC1      | 1.098101266 |
| FAM234B         | 1.19E-07 | 0.1289542 | 0.072 | 0.046 | 0.002876929 | 2.1 | FAM234B   | 1.565217391 |
| FAM110C         | 1.20E-07 | 0.1244686 | 0.064 | 0.039 | 0.002891042 | 2.1 | FAM110C   | 1.641025641 |
| SLC10A1         | 1.21E-07 | 0.1631768 | 0.075 | 0.049 | 0.002906198 | 2.1 | SLC10A1   | 1.530612245 |
| FAM46A          | 1.21E-07 | 0.2818282 | 0.208 | 0.168 | 0.002906846 | 2.1 | FAM46A    | 1.238095238 |
| SPIN1           | 1.22E-07 | 0.2578377 | 0.25  | 0.214 | 0.002939907 | 2.1 | SPIN1     | 1.168224299 |
| BCAR3           | 1.27E-07 | 0.1662302 | 0.326 | 0.276 | 0.003058275 | 2.1 | BCAR3     | 1.18115942  |
| MITF            | 1.30E-07 | 0.1236632 | 0.054 | 0.032 | 0.003131057 | 2.1 | MITF      | 1.6875      |
| SFXN5           | 1.33E-07 | 0.1328308 | 0.047 | 0.027 | 0.003201982 | 2.1 | SFXN5     | 1.740740741 |
| MAOA            | 1.34E-07 | 0.1507417 | 0.085 | 0.056 | 0.003222105 | 2.1 | MAOA      | 1.517857143 |
| PPTC71          | 1.36E-07 | 0.252058  | 0.231 | 0.192 | 0.003273437 | 2.1 | PPTC7     | 1.203125    |
| DNAH3           | 1.43E-07 | 0.1346855 | 0.046 | 0.026 | 0.003456016 | 2.1 | DNAH3     | 1.769230769 |
| GFPT12          | 1.47E-07 | 0.2935117 | 0.226 | 0.19  | 0.003554463 | 2.1 | GFPT1     | 1.189473684 |
| RALA            | 1.50E-07 | 0.2669065 | 0.25  | 0.213 | 0.003622061 | 2.1 | RALA      | 1.17370892  |
| YARS3           | 1.56E-07 | 0.2516999 | 0.312 | 0.278 | 0.003766557 | 2.1 | YARS      | 1.122302158 |
| PPME1           | 1.61E-07 | 0.2082431 | 0.111 | 0.079 | 0.003889245 | 2.1 | PPME1     | 1.405063291 |
| MKRN1           | 1.72E-07 | 0.2346294 | 0.19  | 0.153 | 0.004158486 | 2.1 | MKRN1     | 1.241830065 |
| MOK1            | 1.82E-07 | 0.1398851 | 0.079 | 0.053 | 0.004392853 | 2.1 | MOK       | 1.490566038 |
| LINC00704       | 1.82E-07 | 0.103858  | 0.048 | 0.027 | 0.004395965 | 2.1 | LINC00704 | 1.777777778 |
| NPIP5           | 1.85E-07 | 0.1859016 | 0.119 | 0.087 | 0.004462734 | 2.1 | NPIP5     | 1.367816092 |
| IPPK            | 1.89E-07 | 0.1043828 | 0.036 | 0.019 | 0.004551419 | 2.1 | IPPK      | 1.894736842 |
| CYCS2           | 2.08E-07 | 0.2600818 | 0.534 | 0.52  | 0.005018851 | 2.1 | CYCS      | 1.026923077 |
| C2orf882        | 2.22E-07 | 0.2306162 | 0.374 | 0.348 | 0.005354026 | 2.1 | C2orf88   | 1.074712644 |
| ZFP36L21        | 2.23E-07 | 0.3649103 | 0.395 | 0.371 | 0.005370527 | 2.1 | ZFP36L2   | 1.064690027 |
| MPRIP-AS12      | 2.26E-07 | 0.1708818 | 0.086 | 0.058 | 0.00544581  | 2.1 | MPRIP-AS1 | 1.482758621 |
| FBXL20          | 2.29E-07 | 0.2877616 | 0.339 | 0.316 | 0.005528876 | 2.1 | FBXL20    | 1.07278481  |
| RP2             | 2.35E-07 | 0.1299993 | 0.053 | 0.031 | 0.005662684 | 2.1 | RP2       | 1.709677419 |
| BBOF1           | 2.36E-07 | 0.1690495 | 0.076 | 0.05  | 0.005694062 | 2.1 | BBOF1     | 1.52        |
| IL1RAPL2        | 2.37E-07 | 0.1795126 | 0.115 | 0.083 | 0.005713801 | 2.1 | IL1RAPL2  | 1.385542169 |
| FOXA1           | 2.45E-07 | 0.1925009 | 0.153 | 0.116 | 0.005911621 | 2.1 | FOXA1     | 1.318965517 |
| CTNNAL11        | 2.86E-07 | 0.2507731 | 0.161 | 0.126 | 0.006887869 | 2.1 | CTNNAL1   | 1.277777778 |
| PDIA5           | 2.86E-07 | 0.122162  | 0.055 | 0.033 | 0.006907662 | 2.1 | PDIA5     | 1.666666667 |
| RP11-486A14.2   | 2.88E-07 | 0.1055869 | 0.029 | 0.014 | 0.00695197  | 2.1 | RP11-486A | 2.071428571 |
| USP32           | 3.02E-07 | 0.2843259 | 0.264 | 0.23  | 0.007289214 | 2.1 | USP32     | 1.147826087 |
| EXOC6B          | 3.03E-07 | 0.3182766 | 0.304 | 0.271 | 0.007304145 | 2.1 | EXOC6B    | 1.121771218 |
| HDAC3           | 3.04E-07 | 0.1802629 | 0.088 | 0.06  | 0.007338148 | 2.1 | HDAC3     | 1.466666667 |
| TNKS2           | 3.10E-07 | 0.2573261 | 0.289 | 0.259 | 0.007481997 | 2.1 | TNKS2     | 1.115830116 |
| CYLD3           | 3.12E-07 | 0.1941723 | 0.25  | 0.21  | 0.007520451 | 2.1 | CYLD      | 1.19047619  |
| ETNK1           | 3.17E-07 | 0.2567178 | 0.232 | 0.198 | 0.007637717 | 2.1 | ETNK1     | 1.171717172 |
| ZSWIM8          | 3.35E-07 | 0.1659944 | 0.09  | 0.062 | 0.008089227 | 2.1 | ZSWIM8    | 1.451612903 |
| HSPA1A          | 3.55E-07 | 0.3146401 | 0.107 | 0.077 | 0.00856616  | 2.1 | HSPA1A    | 1.38961039  |
| RP11-703M24.5   | 3.57E-07 | 0.173454  | 0.085 | 0.058 | 0.008603078 | 2.1 | RP11-703M | 1.465517241 |
| RP11-277P12.202 | 3.61E-07 | 0.2082097 | 0.096 | 0.067 | 0.00870934  | 2.1 | RP11-277P | 1.432835821 |
| SEC24A2         | 3.69E-07 | 0.264459  | 0.209 | 0.173 | 0.008897785 | 2.1 | SEC24A    | 1.208092486 |
| LACTB           | 3.71E-07 | 0.1509557 | 0.089 | 0.061 | 0.008954401 | 2.1 | LACTB     | 1.459016393 |
| RALGAPA1        | 3.81E-07 | 0.2559611 | 0.335 | 0.304 | 0.009177633 | 2.1 | RALGAPA1  | 1.101973684 |
| EIF2AK1         | 3.82E-07 | 0.5038823 | 0.144 | 0.111 | 0.009203449 | 2.1 | EIF2AK1   | 1.297297297 |
| NAP1L4          | 3.88E-07 | 0.2462726 | 0.235 | 0.201 | 0.009354101 | 2.1 | NAP1L4    | 1.169154229 |
| RAB1A1          | 4.09E-07 | 0.2560972 | 0.461 | 0.456 | 0.009854113 | 2.1 | RAB1A     | 1.010964912 |
| POU2F1          | 4.47E-07 | 0.2616815 | 0.199 | 0.164 | 0.01076972  | 2.1 | POU2F1    | 1.213414634 |
| PPP1R15A        | 4.59E-07 | 0.1243057 | 0.051 | 0.03  | 0.01105977  | 2.1 | PPP1R15A  | 1.7         |
| USP22           | 4.67E-07 | 0.2023852 | 0.154 | 0.119 | 0.01126653  | 2.1 | USP22     | 1.294117647 |

|               |          |           |       |       |            |     |            |             |
|---------------|----------|-----------|-------|-------|------------|-----|------------|-------------|
| ADAM92        | 4.69E-07 | 0.1622668 | 0.578 | 0.568 | 0.01129942 | 2.1 | ADAM9      | 1.017605634 |
| GRB2          | 4.79E-07 | 0.2066007 | 0.195 | 0.16  | 0.01155593 | 2.1 | GRB2       | 1.21875     |
| TPRG1         | 4.87E-07 | 0.2659818 | 0.15  | 0.116 | 0.01174516 | 2.1 | TPRG1      | 1.293103448 |
| WDR19         | 4.98E-07 | 0.2317302 | 0.133 | 0.101 | 0.01200185 | 2.1 | WDR19      | 1.316831683 |
| SRP14         | 5.03E-07 | 0.111938  | 0.86  | 0.876 | 0.01213442 | 2.1 | SRP14      | 0.98173516  |
| MYO5A         | 5.05E-07 | 0.2621702 | 0.137 | 0.105 | 0.01218527 | 2.1 | MYO5A      | 1.304761905 |
| ASB7          | 5.40E-07 | 0.1394222 | 0.056 | 0.035 | 0.01301474 | 2.1 | ASB7       | 1.6         |
| PRKAR2B       | 5.50E-07 | 0.1818053 | 0.079 | 0.053 | 0.0132654  | 2.1 | PRKAR2B    | 1.490566038 |
| NAA35         | 5.51E-07 | 0.248164  | 0.166 | 0.133 | 0.01328671 | 2.1 | NAA35      | 1.248120301 |
| AF127577.11   | 5.62E-07 | 0.150715  | 0.069 | 0.045 | 0.01355901 | 2.1 | AF127577.1 | 1.533333333 |
| RP11-517O13.1 | 5.90E-07 | 0.1213008 | 0.044 | 0.025 | 0.01422116 | 2.1 | RP11-517O  | 1.76        |
| ITGB6         | 6.11E-07 | 0.2407812 | 0.412 | 0.382 | 0.01472668 | 2.1 | ITGB6      | 1.078534031 |
| MAPK10        | 6.19E-07 | 0.1397889 | 0.068 | 0.044 | 0.0149216  | 2.1 | MAPK10     | 1.545454545 |
| JADE3         | 6.34E-07 | 0.1738516 | 0.081 | 0.055 | 0.01529758 | 2.1 | JADE3      | 1.472727273 |
| ADM1          | 6.52E-07 | 0.1026666 | 0.041 | 0.023 | 0.01573165 | 2.1 | ADM        | 1.782608696 |
| CTB-12O2.1    | 6.55E-07 | 0.181731  | 0.038 | 0.021 | 0.01580342 | 2.1 | CTB-12O2.1 | 1.80952381  |
| AC004893.11   | 6.77E-07 | 0.1243973 | 0.064 | 0.04  | 0.01632352 | 2.1 | AC004893.1 | 1.6         |
| MEX3C         | 6.94E-07 | 0.1485751 | 0.093 | 0.065 | 0.01674324 | 2.1 | MEX3C      | 1.430769231 |
| LRCH3         | 7.23E-07 | 0.2943475 | 0.367 | 0.346 | 0.01742651 | 2.1 | LRCH3      | 1.060693642 |
| TRRAP         | 7.77E-07 | 0.1837594 | 0.087 | 0.061 | 0.01874611 | 2.1 | TRRAP      | 1.426229508 |
| NUCB2         | 8.39E-07 | 0.2169686 | 0.161 | 0.127 | 0.02021887 | 2.1 | NUCB2      | 1.267716535 |
| RP11-507B12.1 | 8.53E-07 | 0.1007212 | 0.047 | 0.027 | 0.02057235 | 2.1 | RP11-507B  | 1.740740741 |
| DLGAP1        | 8.63E-07 | 0.4100021 | 0.239 | 0.202 | 0.02081718 | 2.1 | DLGAP1     | 1.183168317 |
| PDHX          | 8.97E-07 | 0.1772902 | 0.103 | 0.074 | 0.02162459 | 2.1 | PDHX       | 1.391891892 |
| PI4KB         | 9.01E-07 | 0.1779845 | 0.083 | 0.057 | 0.02173437 | 2.1 | PI4KB      | 1.456140351 |
| STXBP4        | 9.64E-07 | 0.1622246 | 0.067 | 0.044 | 0.02324237 | 2.1 | STXBP4     | 1.522727273 |
| TMCC3         | 9.99E-07 | 0.1393004 | 0.059 | 0.037 | 0.02409292 | 2.1 | TMCC3      | 1.594594595 |
| TMEM185A      | 9.99E-07 | 0.1270437 | 0.067 | 0.044 | 0.02409373 | 2.1 | TMEM185A   | 1.522727273 |
| GDPD4         | 1.01E-06 | 0.2131384 | 0.023 | 0.01  | 0.0243298  | 2.1 | GDPD4      | 2.3         |
| REEP5         | 1.08E-06 | 0.1833771 | 0.288 | 0.251 | 0.02612247 | 2.1 | REEP5      | 1.147410359 |
| IL12RB2       | 1.10E-06 | 0.1000589 | 0.038 | 0.021 | 0.0264649  | 2.1 | IL12RB2    | 1.80952381  |
| PKM           | 1.11E-06 | 0.1943566 | 0.381 | 0.351 | 0.02665265 | 2.1 | PKM        | 1.085470085 |
| SIX4          | 1.13E-06 | 0.1749521 | 0.107 | 0.078 | 0.02734483 | 2.1 | SIX4       | 1.371794872 |
| RBFOX1        | 1.15E-06 | 0.1664672 | 0.134 | 0.102 | 0.02784102 | 2.1 | RBFOX1     | 1.31372549  |
| PCF11         | 1.18E-06 | 0.2496824 | 0.155 | 0.123 | 0.02852427 | 2.1 | PCF11      | 1.260162602 |
| DYNLL11       | 1.20E-06 | 0.2477706 | 0.277 | 0.243 | 0.02900605 | 2.1 | DYNLL1     | 1.139917695 |
| COL12A1       | 1.22E-06 | 0.184259  | 0.073 | 0.048 | 0.02934636 | 2.1 | COL12A1    | 1.520833333 |
| GPR160        | 1.22E-06 | 0.1741541 | 0.124 | 0.093 | 0.02953767 | 2.1 | GPR160     | 1.333333333 |
| TFG1          | 1.23E-06 | 0.2407996 | 0.321 | 0.292 | 0.02975486 | 2.1 | TFG        | 1.099315068 |
| ZC3H7A2       | 1.27E-06 | 0.1645457 | 0.206 | 0.17  | 0.03050723 | 2.1 | ZC3H7A     | 1.211764706 |
| BCL101        | 1.27E-06 | 0.1929111 | 0.176 | 0.143 | 0.03057213 | 2.1 | BCL10      | 1.230769231 |
| IL13RA1       | 1.32E-06 | 0.2000781 | 0.155 | 0.122 | 0.03174193 | 2.1 | IL13RA1    | 1.270491803 |
| BAALC-AS1     | 1.41E-06 | 0.1285604 | 0.046 | 0.027 | 0.03408737 | 2.1 | BAALC-AS1  | 1.703703704 |
| TM9SF31       | 1.45E-06 | 0.2497825 | 0.336 | 0.31  | 0.03488973 | 2.1 | TM9SF3     | 1.083870968 |
| CCNL1         | 1.50E-06 | 0.2501964 | 0.424 | 0.412 | 0.03615701 | 2.1 | CCNL1      | 1.029126214 |
| RAB7A         | 1.54E-06 | 0.2098507 | 0.464 | 0.452 | 0.03715003 | 2.1 | RAB7A      | 1.026548673 |
| SC5D          | 1.57E-06 | 0.1665914 | 0.22  | 0.182 | 0.03776965 | 2.1 | SC5D       | 1.208791209 |
| IMPAD1        | 1.72E-06 | 0.1292444 | 0.09  | 0.063 | 0.04150599 | 2.1 | IMPAD1     | 1.428571429 |
| ELP2          | 1.72E-06 | 0.2656922 | 0.244 | 0.213 | 0.04153035 | 2.1 | ELP2       | 1.145539906 |
| FLT3          | 1.75E-06 | 0.1286134 | 0.056 | 0.035 | 0.04229041 | 2.1 | FLT3       | 1.6         |
| ATOX1         | 1.89E-06 | 0.1568113 | 0.12  | 0.09  | 0.04563787 | 2.1 | ATOX1      | 1.333333333 |
| RPH3A         | 1.92E-06 | 0.1211881 | 0.066 | 0.043 | 0.0463679  | 2.1 | RPH3A      | 1.534883721 |

|                |           |           |       |       |            |       |           |              |
|----------------|-----------|-----------|-------|-------|------------|-------|-----------|--------------|
| ABCA12         | 2.00E-06  | 0.115851  | 0.039 | 0.022 | 0.04818959 | 2.1   | ABCA12    | 1.772727273  |
| LMAN13         | 2.01E-06  | 0.2638901 | 0.213 | 0.181 | 0.04849685 | 2.1   | LMAN1     | 1.17679558   |
| TRAPPC8        | 2.02E-06  | 0.1915793 | 0.143 | 0.111 | 0.04866317 | 2.1   | TRAPPC8   | 1.288288288  |
| ANKRD30A1      | 0         | 2.202454  | 0.962 | 0.441 |            | 0 2.2 | ANKRD30A  | 2.181405896  |
| MYBPC11        | 0         | 2.07511   | 0.691 | 0.204 |            | 0 2.2 | MYBPC1    | 3.387254902  |
| GSTM31         | 0         | 2.058135  | 0.779 | 0.3   |            | 0 2.2 | GSTM3     | 2.596666667  |
| ELOVL51        | 0         | 1.928783  | 0.765 | 0.266 |            | 0 2.2 | ELOVL5    | 2.87593985   |
| XBP1           | 0         | 1.843671  | 0.776 | 0.367 |            | 0 2.2 | XBP1      | 2.114441417  |
| TNFSF11        | 0         | 1.337634  | 0.304 | 0.047 |            | 0 2.2 | TNFSF11   | 6.468085106  |
| C8orf41        | 1.10E-305 | 1.725306  | 0.897 | 0.496 | 2.66E-301  | 2.2   | C8orf4    | 1.808467742  |
| CXCL131        | 1.14E-298 | 1.880267  | 0.818 | 0.386 | 2.75E-294  | 2.2   | CXCL13    | 2.119170984  |
| AFF31          | 9.40E-296 | 1.905245  | 0.74  | 0.314 | 2.27E-291  | 2.2   | AFF3      | 2.356687898  |
| AGR21          | 9.75E-295 | 1.462608  | 0.635 | 0.219 | 2.35E-290  | 2.2   | AGR2      | 2.899543379  |
| EFHD11         | 2.06E-282 | 1.401908  | 0.682 | 0.276 | 4.97E-278  | 2.2   | EFHD1     | 2.471014493  |
| HEPACAM21      | 4.80E-278 | 0.9158496 | 0.237 | 0.03  | 1.16E-273  | 2.2   | HEPACAM2  | 7.9          |
| DIO21          | 6.16E-274 | 1.983679  | 0.59  | 0.201 | 1.48E-269  | 2.2   | DIO2      | 2.935323383  |
| RP11-507B12.21 | 3.87E-260 | 1.407982  | 0.374 | 0.085 | 9.34E-256  | 2.2   | RP11-507B | 4.4          |
| DNAJC121       | 8.91E-255 | 1.356759  | 0.772 | 0.367 | 2.15E-250  | 2.2   | DNAJC12   | 2.103542234  |
| COX6C1         | 6.51E-243 | 1.379199  | 0.915 | 0.753 | 1.57E-238  | 2.2   | COX6C     | 1.215139442  |
| SH3BGRL1       | 1.45E-241 | 1.366227  | 0.727 | 0.382 | 3.49E-237  | 2.2   | SH3BGRL   | 1.903141361  |
| RP11-384F7.21  | 1.06E-217 | 1.270707  | 0.267 | 0.05  | 2.55E-213  | 2.2   | RP11-384F | 5.34         |
| AGR31          | 3.48E-215 | 1.340566  | 0.54  | 0.197 | 8.38E-211  | 2.2   | AGR3      | 2.741116751  |
| APELA1         | 5.64E-212 | 0.641068  | 0.136 | 0.012 | 1.36E-207  | 2.2   | APELA     | 11.333333333 |
| PTHLH1         | 3.55E-206 | 1.474658  | 0.546 | 0.217 | 8.55E-202  | 2.2   | PTHLH     | 2.516129032  |
| AREG1          | 1.83E-205 | 1.038275  | 0.807 | 0.429 | 4.41E-201  | 2.2   | AREG      | 1.881118881  |
| IGFBP41        | 1.12E-183 | 1.101682  | 0.397 | 0.124 | 2.71E-179  | 2.2   | IGFBP4    | 3.201612903  |
| TMA71          | 2.19E-181 | 1.172431  | 0.779 | 0.591 | 5.27E-177  | 2.2   | TMA7      | 1.318104907  |
| CADPS21        | 3.82E-175 | 2.202855  | 0.655 | 0.389 | 9.20E-171  | 2.2   | CADPS2    | 1.683804627  |
| ERBB41         | 9.63E-174 | 1.004542  | 0.833 | 0.472 | 2.32E-169  | 2.2   | ERBB4     | 1.764830508  |
| UGDH1          | 2.96E-172 | 1.268066  | 0.527 | 0.219 | 7.15E-168  | 2.2   | UGDH      | 2.406392694  |
| FXYD31         | 1.40E-159 | 1.072436  | 0.833 | 0.621 | 3.38E-155  | 2.2   | FXYD3     | 1.341384863  |
| LPAR31         | 4.43E-159 | 0.74112   | 0.185 | 0.032 | 1.07E-154  | 2.2   | LPAR3     | 5.78125      |
| F31            | 2.69E-157 | 1.127204  | 0.329 | 0.098 | 6.49E-153  | 2.2   | F3        | 3.357142857  |
| FAM105A1       | 3.45E-156 | 0.6011882 | 0.141 | 0.019 | 8.31E-152  | 2.2   | FAM105A   | 7.421052632  |
| SLC39A61       | 1.90E-153 | 1.064908  | 0.58  | 0.286 | 4.58E-149  | 2.2   | SLC39A6   | 2.027972028  |
| HSPH11         | 2.04E-147 | 1.400543  | 0.542 | 0.269 | 4.93E-143  | 2.2   | HSPH1     | 2.014869888  |
| RP11-507B12.11 | 8.26E-146 | 0.689311  | 0.145 | 0.021 | 1.99E-141  | 2.2   | RP11-507B | 6.904761905  |
| SDC21          | 4.83E-138 | 0.8923888 | 0.26  | 0.068 | 1.16E-133  | 2.2   | SDC2      | 3.823529412  |
| NEDD4L2        | 4.53E-137 | 1.169576  | 0.778 | 0.588 | 1.09E-132  | 2.2   | NEDD4L    | 1.323129252  |
| TNIK1          | 1.01E-136 | 1.105084  | 0.39  | 0.147 | 2.45E-132  | 2.2   | TNIK      | 2.653061224  |
| NDUFB11        | 2.74E-136 | 1.276058  | 0.587 | 0.344 | 6.61E-132  | 2.2   | NDUFB1    | 1.706395349  |
| DBI3           | 2.08E-130 | 0.9245912 | 0.822 | 0.643 | 5.02E-126  | 2.2   | DBI       | 1.278382582  |
| PRDX31         | 4.15E-130 | 0.9453925 | 0.463 | 0.211 | 1.00E-125  | 2.2   | PRDX3     | 2.194312796  |
| ATP5E1         | 2.54E-129 | 1.132719  | 0.723 | 0.546 | 6.13E-125  | 2.2   | ATP5E     | 1.324175824  |
| PRLR1          | 1.06E-128 | 1.053263  | 0.481 | 0.222 | 2.55E-124  | 2.2   | PRLR      | 2.166666667  |
| DIO2-AS11      | 1.70E-128 | 0.9571079 | 0.259 | 0.073 | 4.09E-124  | 2.2   | DIO2-AS1  | 3.547945205  |
| APOL4          | 1.20E-127 | 0.3890655 | 0.097 | 0.01  | 2.88E-123  | 2.2   | APOL4     | 9.7          |
| SCP21          | 5.50E-122 | 0.9643454 | 0.562 | 0.31  | 1.33E-117  | 2.2   | SCP2      | 1.812903226  |
| UQCRB2         | 2.61E-121 | 0.7939216 | 0.879 | 0.801 | 6.29E-117  | 2.2   | UQCRB     | 1.097378277  |
| ACSL31         | 3.87E-116 | 1.097075  | 0.567 | 0.323 | 9.33E-112  | 2.2   | ACSL3     | 1.755417957  |
| HPX1           | 5.65E-116 | 1.080545  | 0.454 | 0.201 | 1.36E-111  | 2.2   | HPX       | 2.258706468  |
| NDUFA5         | 1.05E-114 | 0.9462276 | 0.537 | 0.297 | 2.53E-110  | 2.2   | NDUFA5    | 1.808080808  |

|              |           |           |       |       |           |     |           |             |
|--------------|-----------|-----------|-------|-------|-----------|-----|-----------|-------------|
| UQCR10       | 4.01E-114 | 1.019336  | 0.68  | 0.498 | 9.67E-110 | 2.2 | UQCR10    | 1.365461847 |
| GPBP12       | 7.84E-114 | 0.9680366 | 0.8   | 0.682 | 1.89E-109 | 2.2 | GPBP1     | 1.173020528 |
| PGR1         | 1.93E-112 | 0.8568612 | 0.246 | 0.072 | 4.65E-108 | 2.2 | PGR       | 3.416666667 |
| LINC005041   | 2.71E-108 | 0.8256343 | 0.256 | 0.08  | 6.54E-104 | 2.2 | LINC00504 | 3.2         |
| COX6B11      | 5.09E-107 | 0.7496011 | 0.846 | 0.755 | 1.23E-102 | 2.2 | COX6B1    | 1.120529801 |
| ATP5G23      | 7.38E-107 | 0.7376931 | 0.843 | 0.732 | 1.78E-102 | 2.2 | ATP5G2    | 1.151639344 |
| HMG51        | 2.21E-106 | 0.7016368 | 0.214 | 0.059 | 5.32E-102 | 2.2 | HMG5      | 3.627118644 |
| LRR11        | 2.53E-106 | 0.9870996 | 0.339 | 0.134 | 6.09E-102 | 2.2 | LRR1      | 2.529850746 |
| RP11-53O19.1 | 4.58E-106 | 0.443126  | 0.093 | 0.012 | 1.11E-101 | 2.2 | RP11-53O1 | 7.75        |
| ATP13A41     | 6.19E-106 | 0.5877538 | 0.143 | 0.028 | 1.49E-101 | 2.2 | ATP13A4   | 5.107142857 |
| GSTK11       | 5.09E-105 | 0.8777858 | 0.331 | 0.129 | 1.23E-100 | 2.2 | GSTK1     | 2.565891473 |
| UBB2         | 5.82E-105 | 0.8573278 | 0.837 | 0.715 | 1.40E-100 | 2.2 | UBB       | 1.170629371 |
| SFMBT21      | 1.44E-104 | 0.9835795 | 0.371 | 0.157 | 3.47E-100 | 2.2 | SFMBT2    | 2.363057325 |
| BCL21        | 8.54E-104 | 1.049547  | 0.504 | 0.259 | 2.06E-99  | 2.2 | BCL2      | 1.945945946 |
| IL20RA       | 1.63E-103 | 0.7309293 | 0.184 | 0.046 | 3.93E-99  | 2.2 | IL20RA    | 4           |
| COX7C2       | 6.55E-103 | 0.6697906 | 0.908 | 0.871 | 1.58E-98  | 2.2 | COX7C     | 1.042479908 |
| BHLHE401     | 7.87E-101 | 0.9152173 | 0.392 | 0.175 | 1.90E-96  | 2.2 | BHLHE40   | 2.24        |
| Sep-41       | 3.29E-100 | 0.3660522 | 0.097 | 0.014 | 7.92E-96  | 2.2 | Sep-04    | 6.928571429 |
| ENPP11       | 4.79E-100 | 0.8278489 | 0.321 | 0.123 | 1.15E-95  | 2.2 | ENPP1     | 2.609756098 |
| ATP5I1       | 8.61E-99  | 0.9021504 | 0.326 | 0.133 | 2.08E-94  | 2.2 | ATP5I     | 2.45112782  |
| AR1          | 3.02E-98  | 0.9683406 | 0.356 | 0.148 | 7.29E-94  | 2.2 | AR        | 2.405405405 |
| EGOT1        | 7.60E-98  | 0.8608328 | 0.288 | 0.106 | 1.83E-93  | 2.2 | EGOT      | 2.716981132 |
| ADGRL31      | 1.43E-96  | 0.9385722 | 0.276 | 0.098 | 3.45E-92  | 2.2 | ADGRL3    | 2.816326531 |
| GCNT21       | 5.06E-96  | 1.374725  | 0.616 | 0.435 | 1.22E-91  | 2.2 | GCNT2     | 1.416091954 |
| SLC7A21      | 6.58E-95  | 0.7918076 | 0.542 | 0.287 | 1.59E-90  | 2.2 | SLC7A2    | 1.888501742 |
| CTC-558O2.11 | 1.22E-94  | 0.2826186 | 0.056 | 0.004 | 2.93E-90  | 2.2 | CTC-558O2 | 14          |
| ZNF689       | 1.58E-93  | 0.3739681 | 0.084 | 0.011 | 3.82E-89  | 2.2 | ZNF689    | 7.636363636 |
| HES1         | 5.20E-92  | 1.313742  | 0.537 | 0.331 | 1.25E-87  | 2.2 | HES1      | 1.622356495 |
| MPHOSPH6     | 8.38E-92  | 0.8209065 | 0.301 | 0.118 | 2.02E-87  | 2.2 | MPHOSPH6  | 2.550847458 |
| MLPH1        | 2.12E-90  | 0.7110246 | 0.211 | 0.065 | 5.12E-86  | 2.2 | MLPH      | 3.246153846 |
| DENND4A1     | 3.30E-89  | 1.103746  | 0.711 | 0.588 | 7.96E-85  | 2.2 | DENND4A   | 1.209183673 |
| TMEM21       | 3.32E-89  | 1.140136  | 0.542 | 0.336 | 8.01E-85  | 2.2 | TMEM2     | 1.613095238 |
| ATP5EP21     | 1.71E-88  | 0.9464375 | 0.497 | 0.293 | 4.11E-84  | 2.2 | ATP5EP2   | 1.696245734 |
| RP1          | 2.26E-88  | 0.2661589 | 0.052 | 0.004 | 5.44E-84  | 2.2 | RP1       | 13          |
| FTO1         | 2.30E-88  | 0.8560246 | 0.452 | 0.243 | 5.53E-84  | 2.2 | FTO       | 1.860082305 |
| C3orf14      | 2.46E-88  | 0.7932833 | 0.274 | 0.104 | 5.93E-84  | 2.2 | C3orf14   | 2.634615385 |
| UBL51        | 2.73E-87  | 0.934341  | 0.66  | 0.501 | 6.59E-83  | 2.2 | UBL5      | 1.317365269 |
| TSPAN51      | 3.97E-86  | 0.8900428 | 0.523 | 0.296 | 9.57E-82  | 2.2 | TSPAN5    | 1.766891892 |
| RCL11        | 4.41E-86  | 0.6865944 | 0.202 | 0.062 | 1.06E-81  | 2.2 | RCL1      | 3.258064516 |
| MAP3K11      | 4.57E-85  | 0.8128553 | 0.663 | 0.446 | 1.10E-80  | 2.2 | MAP3K1    | 1.486547085 |
| NFKB12       | 5.50E-84  | 1.037532  | 0.61  | 0.441 | 1.33E-79  | 2.2 | NFKB1     | 1.383219955 |
| AMPH1        | 5.30E-83  | 0.8299315 | 0.254 | 0.092 | 1.28E-78  | 2.2 | AMPH      | 2.760869565 |
| RAB11A2      | 4.41E-82  | 0.9681773 | 0.731 | 0.637 | 1.06E-77  | 2.2 | RAB11A    | 1.147566719 |
| CCBE11       | 4.97E-82  | 0.6744539 | 0.161 | 0.043 | 1.20E-77  | 2.2 | CCBE1     | 3.744186047 |
| SUSD61       | 1.50E-81  | 0.8961799 | 0.469 | 0.268 | 3.62E-77  | 2.2 | SUSD6     | 1.75        |
| UQCC21       | 5.14E-81  | 0.5614197 | 0.169 | 0.047 | 1.24E-76  | 2.2 | UQCC2     | 3.595744681 |
| REEP51       | 6.56E-81  | 0.8544482 | 0.44  | 0.242 | 1.58E-76  | 2.2 | REEP5     | 1.818181818 |
| APBB2        | 1.61E-80  | 0.9234745 | 0.453 | 0.246 | 3.89E-76  | 2.2 | APBB2     | 1.841463415 |
| MSMO11       | 1.70E-80  | 0.9285917 | 0.528 | 0.322 | 4.10E-76  | 2.2 | MSMO1     | 1.639751553 |
| C9orf152     | 2.72E-80  | 0.5720205 | 0.156 | 0.041 | 6.56E-76  | 2.2 | C9orf152  | 3.804878049 |
| SLC2A10      | 3.23E-80  | 0.3471165 | 0.078 | 0.011 | 7.80E-76  | 2.2 | SLC2A10   | 7.090909091 |
| GALNT61      | 1.85E-79  | 0.6138185 | 0.186 | 0.056 | 4.45E-75  | 2.2 | GALNT6    | 3.321428571 |

|              |          |           |       |       |          |     |           |             |
|--------------|----------|-----------|-------|-------|----------|-----|-----------|-------------|
| MALAT11      | 2.05E-79 | 0.3595439 | 1     | 1     | 4.93E-75 | 2.2 | MALAT1    | 1           |
| FBP11        | 3.10E-79 | 0.4979548 | 0.133 | 0.031 | 7.47E-75 | 2.2 | FBP1      | 4.290322581 |
| ATP8B1       | 7.71E-79 | 1.138663  | 0.571 | 0.395 | 1.86E-74 | 2.2 | ATP8B1    | 1.44556962  |
| AZGP11       | 1.01E-78 | 0.6677332 | 0.74  | 0.536 | 2.45E-74 | 2.2 | AZGP1     | 1.380597015 |
| ATP5L4       | 1.99E-78 | 0.5910223 | 0.877 | 0.806 | 4.79E-74 | 2.2 | ATP5L     | 1.08808933  |
| C1orf211     | 1.25E-77 | 0.8998225 | 0.504 | 0.303 | 3.02E-73 | 2.2 | C1orf21   | 1.663366337 |
| C14orf21     | 1.36E-77 | 0.7592973 | 0.77  | 0.705 | 3.28E-73 | 2.2 | C14orf2   | 1.092198582 |
| PTPN131      | 3.62E-77 | 0.85675   | 0.357 | 0.169 | 8.73E-73 | 2.2 | PTPN13    | 2.112426036 |
| TCEAL41      | 1.92E-76 | 0.8973404 | 0.401 | 0.215 | 4.63E-72 | 2.2 | TCEAL4    | 1.865116279 |
| MORN22       | 2.87E-76 | 0.5411825 | 0.18  | 0.054 | 6.93E-72 | 2.2 | MORN2     | 3.333333333 |
| PPCS         | 6.13E-75 | 0.4741929 | 0.146 | 0.038 | 1.48E-70 | 2.2 | PPCS      | 3.842105263 |
| PEBP41       | 8.01E-75 | 0.7358931 | 0.236 | 0.087 | 1.93E-70 | 2.2 | PEBP4     | 2.712643678 |
| SRP141       | 2.20E-74 | 0.5187575 | 0.916 | 0.871 | 5.31E-70 | 2.2 | SRP14     | 1.051664753 |
| TBC1D91      | 2.64E-74 | 0.8102456 | 0.624 | 0.439 | 6.37E-70 | 2.2 | TBC1D9    | 1.421412301 |
| MB21D21      | 4.76E-74 | 0.7854057 | 0.235 | 0.088 | 1.15E-69 | 2.2 | MB21D2    | 2.670454545 |
| NDUFA42      | 2.17E-73 | 0.6286881 | 0.821 | 0.745 | 5.22E-69 | 2.2 | NDUFA4    | 1.102013423 |
| PLEKHB21     | 1.24E-72 | 0.7646046 | 0.326 | 0.154 | 2.98E-68 | 2.2 | PLEKHB2   | 2.116883117 |
| ERBB2IP1     | 2.17E-72 | 1.042042  | 0.578 | 0.42  | 5.24E-68 | 2.2 | ERBB2IP   | 1.376190476 |
| MT1E         | 2.95E-72 | 0.4284959 | 0.156 | 0.043 | 7.11E-68 | 2.2 | MT1E      | 3.627906977 |
| CSNK1A11     | 4.46E-72 | 0.7659387 | 0.756 | 0.649 | 1.07E-67 | 2.2 | CSNK1A1   | 1.164869029 |
| PANK31       | 7.64E-72 | 0.7884728 | 0.345 | 0.168 | 1.84E-67 | 2.2 | PANK3     | 2.053571429 |
| PDIA32       | 1.84E-71 | 0.8814373 | 0.481 | 0.297 | 4.44E-67 | 2.2 | PDIA3     | 1.61952862  |
| NDUFB4       | 3.10E-71 | 0.9061913 | 0.571 | 0.428 | 7.48E-67 | 2.2 | NDUFB4    | 1.33411215  |
| TSC22D22     | 6.15E-71 | 0.8357505 | 0.634 | 0.458 | 1.48E-66 | 2.2 | TSC22D2   | 1.384279476 |
| ATOX11       | 2.04E-70 | 0.6114155 | 0.224 | 0.084 | 4.91E-66 | 2.2 | ATOX1     | 2.666666667 |
| SEC622       | 4.39E-70 | 0.7225688 | 0.708 | 0.57  | 1.06E-65 | 2.2 | SEC62     | 1.242105263 |
| STON2        | 9.27E-70 | 0.6162512 | 0.15  | 0.043 | 2.24E-65 | 2.2 | STON2     | 3.488372093 |
| WLS1         | 3.88E-69 | 0.7844035 | 0.341 | 0.166 | 9.37E-65 | 2.2 | WLS       | 2.054216867 |
| NQO11        | 5.01E-68 | 0.54987   | 0.178 | 0.057 | 1.21E-63 | 2.2 | NQO1      | 3.122807018 |
| NFAT52       | 5.29E-68 | 1.017998  | 0.697 | 0.625 | 1.28E-63 | 2.2 | NFAT5     | 1.1152      |
| PRR15L       | 1.25E-67 | 0.4283651 | 0.12  | 0.029 | 3.00E-63 | 2.2 | PRR15L    | 4.137931034 |
| HSPA1A1      | 9.73E-65 | 0.7553454 | 0.2   | 0.072 | 2.35E-60 | 2.2 | HSPA1A    | 2.777777778 |
| KIAA13241    | 1.17E-64 | 0.7550944 | 0.394 | 0.219 | 2.82E-60 | 2.2 | KIAA1324  | 1.799086758 |
| ATP5J1       | 1.20E-64 | 0.7672748 | 0.624 | 0.492 | 2.89E-60 | 2.2 | ATP5J     | 1.268292683 |
| CRACR2A1     | 1.32E-64 | 0.3941083 | 0.09  | 0.018 | 3.18E-60 | 2.2 | CRACR2A   | 5           |
| C1orf168     | 2.88E-64 | 0.2219503 | 0.041 | 0.004 | 6.95E-60 | 2.2 | C1orf168  | 10.25       |
| FASN1        | 5.21E-64 | 0.5482078 | 0.152 | 0.046 | 1.26E-59 | 2.2 | FASN      | 3.304347826 |
| GNAS1        | 6.33E-64 | 0.5672052 | 0.838 | 0.748 | 1.53E-59 | 2.2 | GNAS      | 1.120320856 |
| MEPE1        | 1.20E-63 | 0.3016736 | 0.069 | 0.011 | 2.88E-59 | 2.2 | MEPE      | 6.272727273 |
| QPRT1        | 1.80E-63 | 0.2466197 | 0.062 | 0.009 | 4.34E-59 | 2.2 | QPRT      | 6.888888889 |
| HSPA61       | 4.71E-63 | 0.1709173 | 0.031 | 0.002 | 1.14E-58 | 2.2 | HSPA6     | 15.5        |
| ALOX15B      | 1.42E-62 | 0.5363947 | 0.158 | 0.05  | 3.43E-58 | 2.2 | ALOX15B   | 3.16        |
| TTC39A1      | 3.94E-62 | 0.5154951 | 0.148 | 0.045 | 9.50E-58 | 2.2 | TTC39A    | 3.288888889 |
| SEPP12       | 2.38E-61 | 0.8868992 | 0.472 | 0.303 | 5.75E-57 | 2.2 | SEPP1     | 1.557755776 |
| NDUFA11      | 1.15E-60 | 0.7048093 | 0.696 | 0.602 | 2.76E-56 | 2.2 | NDUFA1    | 1.156146179 |
| ZSCAN16-AS11 | 1.29E-60 | 0.5546073 | 0.214 | 0.084 | 3.10E-56 | 2.2 | ZSCAN16-A | 2.547619048 |
| AC008268.1   | 6.26E-60 | 0.1966825 | 0.034 | 0.002 | 1.51E-55 | 2.2 | AC008268. | 17          |
| FKBP41       | 3.91E-59 | 0.5574349 | 0.182 | 0.066 | 9.43E-55 | 2.2 | FKBP4     | 2.757575758 |
| ATP5G12      | 5.62E-59 | 0.7477431 | 0.333 | 0.174 | 1.36E-54 | 2.2 | ATP5G1    | 1.913793103 |
| PARK71       | 5.86E-59 | 0.7007715 | 0.588 | 0.448 | 1.41E-54 | 2.2 | PARK7     | 1.3125      |
| SLIRP2       | 7.09E-59 | 0.8405801 | 0.458 | 0.301 | 1.71E-54 | 2.2 | SLIRP     | 1.521594684 |
| HSPA1B1      | 7.76E-59 | 0.6600099 | 0.173 | 0.06  | 1.87E-54 | 2.2 | HSPA1B    | 2.883333333 |

|               |          |           |       |       |          |     |           |             |
|---------------|----------|-----------|-------|-------|----------|-----|-----------|-------------|
| ZFP36L22      | 1.00E-58 | 0.6066508 | 0.558 | 0.361 | 2.42E-54 | 2.2 | ZFP36L2   | 1.545706371 |
| KLHL131       | 1.51E-58 | 0.8043619 | 0.24  | 0.102 | 3.64E-54 | 2.2 | KLHL13    | 2.352941176 |
| DLGAP11       | 1.63E-58 | 0.9103335 | 0.362 | 0.195 | 3.93E-54 | 2.2 | DLGAP1    | 1.856410256 |
| CTNND21       | 1.79E-58 | 0.7452787 | 0.301 | 0.146 | 4.32E-54 | 2.2 | CTNND2    | 2.061643836 |
| IRX3          | 1.24E-57 | 0.6044838 | 0.21  | 0.084 | 2.99E-53 | 2.2 | IRX3      | 2.5         |
| SCGB2A21      | 1.46E-57 | 1.620867  | 0.441 | 0.264 | 3.51E-53 | 2.2 | SCGB2A2   | 1.670454545 |
| CRY12         | 2.50E-57 | 0.8891688 | 0.535 | 0.377 | 6.03E-53 | 2.2 | CRY1      | 1.419098143 |
| LSAMP1        | 5.65E-57 | 0.8863306 | 0.622 | 0.463 | 1.36E-52 | 2.2 | LSAMP     | 1.343412527 |
| MAGI31        | 1.11E-56 | 0.8330907 | 0.539 | 0.375 | 2.67E-52 | 2.2 | MAGI3     | 1.437333333 |
| PDZD81        | 3.99E-56 | 0.7336445 | 0.387 | 0.223 | 9.61E-52 | 2.2 | PDZD8     | 1.735426009 |
| ZSWIM61       | 7.24E-56 | 0.7740365 | 0.632 | 0.491 | 1.75E-51 | 2.2 | ZSWIM6    | 1.287169043 |
| CMBL1         | 3.84E-55 | 0.3358365 | 0.089 | 0.02  | 9.25E-51 | 2.2 | CMBL      | 4.45        |
| MRPL241       | 3.98E-55 | 0.4767204 | 0.168 | 0.059 | 9.59E-51 | 2.2 | MRPL24    | 2.847457627 |
| UQCRQ1        | 2.69E-54 | 0.608029  | 0.242 | 0.108 | 6.49E-50 | 2.2 | UQCRQ     | 2.240740741 |
| ERBB21        | 2.78E-54 | 0.612732  | 0.245 | 0.11  | 6.70E-50 | 2.2 | ERBB2     | 2.227272727 |
| AC018816.31   | 6.40E-54 | 0.6417032 | 0.219 | 0.092 | 1.54E-49 | 2.2 | AC018816. | 2.380434783 |
| SLC40A1       | 1.02E-53 | 0.2995705 | 0.085 | 0.019 | 2.46E-49 | 2.2 | SLC40A1   | 4.473684211 |
| NRIP11        | 2.75E-53 | 0.7792682 | 0.423 | 0.26  | 6.64E-49 | 2.2 | NRIP1     | 1.626923077 |
| ARID4B1       | 5.51E-53 | 0.8500515 | 0.629 | 0.553 | 1.33E-48 | 2.2 | ARID4B    | 1.137432188 |
| RP11-140K17.3 | 7.96E-53 | 0.4164561 | 0.126 | 0.038 | 1.92E-48 | 2.2 | RP11-140K | 3.315789474 |
| HS6ST21       | 1.88E-52 | 0.6909583 | 0.286 | 0.139 | 4.54E-48 | 2.2 | HS6ST2    | 2.057553957 |
| HSPA52        | 1.93E-52 | 0.5347802 | 0.612 | 0.441 | 4.65E-48 | 2.2 | HSPA5     | 1.387755102 |
| SERF21        | 5.99E-52 | 0.6660597 | 0.545 | 0.386 | 1.44E-47 | 2.2 | SERF2     | 1.411917098 |
| SLC7A81       | 6.70E-52 | 0.4139238 | 0.128 | 0.039 | 1.62E-47 | 2.2 | SLC7A8    | 3.282051282 |
| SPRED2        | 1.37E-51 | 0.7037343 | 0.359 | 0.204 | 3.30E-47 | 2.2 | SPRED2    | 1.759803922 |
| IRX5          | 1.01E-50 | 0.3952788 | 0.106 | 0.029 | 2.44E-46 | 2.2 | IRX5      | 3.655172414 |
| MCCC21        | 1.06E-50 | 0.6780621 | 0.29  | 0.151 | 2.56E-46 | 2.2 | MCCC2     | 1.920529801 |
| PPP3CA1       | 6.30E-50 | 0.6852381 | 0.676 | 0.558 | 1.52E-45 | 2.2 | PPP3CA    | 1.211469534 |
| OST41         | 2.82E-49 | 0.6900366 | 0.534 | 0.408 | 6.80E-45 | 2.2 | OST4      | 1.308823529 |
| ITPR11        | 3.51E-49 | 0.5581298 | 0.217 | 0.095 | 8.46E-45 | 2.2 | ITPR1     | 2.284210526 |
| TMEM135       | 8.60E-49 | 0.7014288 | 0.225 | 0.102 | 2.07E-44 | 2.2 | TMEM135   | 2.205882353 |
| ZBED5-AS12    | 9.84E-49 | 0.3262706 | 0.1   | 0.027 | 2.37E-44 | 2.2 | ZBED5-AS1 | 3.703703704 |
| RGS221        | 1.71E-48 | 0.2780255 | 0.052 | 0.008 | 4.11E-44 | 2.2 | RGS22     | 6.5         |
| SRP91         | 1.97E-48 | 0.6388088 | 0.543 | 0.416 | 4.75E-44 | 2.2 | SRP9      | 1.305288462 |
| CHD21         | 3.48E-48 | 0.8448474 | 0.622 | 0.544 | 8.40E-44 | 2.2 | CHD2      | 1.143382353 |
| EIF2AK32      | 6.82E-48 | 0.7085965 | 0.507 | 0.354 | 1.65E-43 | 2.2 | EIF2AK3   | 1.43220339  |
| NRXN31        | 8.18E-48 | 0.7257138 | 0.252 | 0.12  | 1.97E-43 | 2.2 | NRXN3     | 2.1         |
| AK5           | 4.18E-47 | 0.376091  | 0.094 | 0.024 | 1.01E-42 | 2.2 | AK5       | 3.916666667 |
| CETN2         | 1.38E-46 | 0.6153958 | 0.314 | 0.175 | 3.34E-42 | 2.2 | CETN2     | 1.794285714 |
| RP11-22N19.21 | 5.23E-46 | 0.2858727 | 0.066 | 0.014 | 1.26E-41 | 2.2 | RP11-22N1 | 4.714285714 |
| NDUFB31       | 1.42E-45 | 0.7022541 | 0.345 | 0.208 | 3.43E-41 | 2.2 | NDUFB3    | 1.658653846 |
| RP11-460M2.11 | 1.70E-45 | 0.2641835 | 0.065 | 0.013 | 4.11E-41 | 2.2 | RP11-460M | 5           |
| RPN21         | 1.74E-45 | 0.6346806 | 0.403 | 0.261 | 4.19E-41 | 2.2 | RPN2      | 1.544061303 |
| NBPF191       | 8.96E-45 | 0.67824   | 0.348 | 0.208 | 2.16E-40 | 2.2 | NBPF19    | 1.673076923 |
| SLC9A3R1      | 1.06E-44 | 0.5774716 | 0.201 | 0.09  | 2.55E-40 | 2.2 | SLC9A3R1  | 2.233333333 |
| EREG1         | 5.27E-44 | 0.4603165 | 0.43  | 0.251 | 1.27E-39 | 2.2 | EREG      | 1.71314741  |
| WNT4          | 1.24E-43 | 0.2559973 | 0.055 | 0.01  | 2.98E-39 | 2.2 | WNT4      | 5.5         |
| COX7A23       | 3.71E-43 | 0.5184783 | 0.795 | 0.761 | 8.95E-39 | 2.2 | COX7A2    | 1.044678055 |
| DECR11        | 6.16E-43 | 0.6084647 | 0.281 | 0.152 | 1.48E-38 | 2.2 | DECR1     | 1.848684211 |
| NBPF141       | 1.35E-42 | 0.6354325 | 0.28  | 0.152 | 3.26E-38 | 2.2 | NBPF14    | 1.842105263 |
| MUCL1         | 1.93E-42 | 0.5092453 | 0.408 | 0.266 | 4.64E-38 | 2.2 | MUCL1     | 1.533834586 |
| CCDC831       | 2.38E-42 | 0.2744171 | 0.074 | 0.018 | 5.74E-38 | 2.2 | CCDC83    | 4.111111111 |

|                   |          |           |       |       |          |     |           |             |
|-------------------|----------|-----------|-------|-------|----------|-----|-----------|-------------|
| VAV31             | 4.23E-42 | 0.6471848 | 0.426 | 0.278 | 1.02E-37 | 2.2 | VAV3      | 1.532374101 |
| PREX11            | 4.96E-42 | 0.4571339 | 0.136 | 0.049 | 1.20E-37 | 2.2 | PREX1     | 2.775510204 |
| HSBP1             | 8.95E-42 | 0.5548015 | 0.647 | 0.55  | 2.16E-37 | 2.2 | HSBP1     | 1.176363636 |
| TOP11             | 2.00E-41 | 0.6874852 | 0.549 | 0.441 | 4.83E-37 | 2.2 | TOP1      | 1.244897959 |
| ABRACL1           | 2.07E-41 | 0.6332933 | 0.536 | 0.416 | 4.99E-37 | 2.2 | ABRACL    | 1.288461538 |
| NME5              | 3.55E-41 | 0.3269409 | 0.085 | 0.023 | 8.57E-37 | 2.2 | NME5      | 3.695652174 |
| LFNG              | 3.76E-41 | 0.1286945 | 0.03  | 0.003 | 9.06E-37 | 2.2 | LFNG      | 10          |
| PCCA1             | 4.15E-41 | 0.7420848 | 0.323 | 0.193 | 1.00E-36 | 2.2 | PCCA      | 1.67357513  |
| GLA1              | 7.63E-41 | 0.5865155 | 0.199 | 0.091 | 1.84E-36 | 2.2 | GLA       | 2.186813187 |
| SAP181            | 2.67E-40 | 0.5181245 | 0.648 | 0.567 | 6.43E-36 | 2.2 | SAP18     | 1.142857143 |
| KTN11             | 3.78E-40 | 0.5933613 | 0.628 | 0.538 | 9.12E-36 | 2.2 | KTN1      | 1.167286245 |
| MIR4458HG         | 6.08E-40 | 0.4727577 | 0.156 | 0.063 | 1.47E-35 | 2.2 | MIR4458HG | 2.476190476 |
| CPEB21            | 8.59E-40 | 0.4763319 | 0.467 | 0.301 | 2.07E-35 | 2.2 | CPEB2     | 1.551495017 |
| DCXR1             | 1.41E-39 | 0.241372  | 0.065 | 0.015 | 3.39E-35 | 2.2 | DCXR      | 4.333333333 |
| LARP4             | 1.90E-39 | 0.5976636 | 0.251 | 0.133 | 4.58E-35 | 2.2 | LARP4     | 1.887218045 |
| CD1641            | 3.01E-39 | 0.6470968 | 0.405 | 0.276 | 7.26E-35 | 2.2 | CD164     | 1.467391304 |
| GSTA42            | 3.69E-39 | 0.4158093 | 0.139 | 0.053 | 8.89E-35 | 2.2 | GSTA4     | 2.622641509 |
| TMCO12            | 7.58E-39 | 0.6030334 | 0.461 | 0.34  | 1.83E-34 | 2.2 | TMCO1     | 1.355882353 |
| AIG1              | 9.49E-39 | 0.5858248 | 0.332 | 0.2   | 2.29E-34 | 2.2 | AIG1      | 1.66        |
| GTF2H52           | 1.02E-38 | 0.6382601 | 0.334 | 0.209 | 2.45E-34 | 2.2 | GTF2H5    | 1.598086124 |
| U47924.271        | 1.19E-38 | 0.3486778 | 0.099 | 0.031 | 2.86E-34 | 2.2 | U47924.27 | 3.193548387 |
| SMIM141           | 2.83E-38 | 0.5773076 | 0.532 | 0.392 | 6.81E-34 | 2.2 | SMIM14    | 1.357142857 |
| YTHDC12           | 3.15E-38 | 0.6409168 | 0.506 | 0.378 | 7.59E-34 | 2.2 | YTHDC1    | 1.338624339 |
| TSPAN1            | 3.92E-38 | 0.5380049 | 0.363 | 0.22  | 9.44E-34 | 2.2 | TSPAN1    | 1.65        |
| ATF6              | 4.23E-38 | 0.6300165 | 0.323 | 0.198 | 1.02E-33 | 2.2 | ATF6      | 1.631313131 |
| HSPE1-MOB4        | 4.56E-38 | 0.2299493 | 0.049 | 0.009 | 1.10E-33 | 2.2 | HSPE1-MO  | 5.444444444 |
| TXN3              | 1.01E-37 | 0.5014291 | 0.738 | 0.672 | 2.43E-33 | 2.2 | TXN       | 1.098214286 |
| UBR52             | 1.10E-37 | 0.618051  | 0.564 | 0.466 | 2.65E-33 | 2.2 | UBR5      | 1.210300429 |
| SMG11             | 1.58E-37 | 0.7270945 | 0.438 | 0.322 | 3.80E-33 | 2.2 | SMG1      | 1.360248447 |
| B3GALNT11         | 1.60E-37 | 0.1951567 | 0.053 | 0.011 | 3.85E-33 | 2.2 | B3GALNT1  | 4.818181818 |
| LSM31             | 1.85E-37 | 0.6447138 | 0.438 | 0.324 | 4.45E-33 | 2.2 | LSM3      | 1.351851852 |
| SHROOM31          | 3.08E-37 | 0.564843  | 0.705 | 0.628 | 7.43E-33 | 2.2 | SHROOM3   | 1.122611465 |
| CYTH31            | 3.59E-37 | 0.7053898 | 0.219 | 0.111 | 8.66E-33 | 2.2 | CYTH3     | 1.972972973 |
| GPS21             | 4.32E-37 | 0.5853968 | 0.288 | 0.164 | 1.04E-32 | 2.2 | GPS2      | 1.756097561 |
| NUP1532           | 6.09E-37 | 0.6171867 | 0.405 | 0.276 | 1.47E-32 | 2.2 | NUP153    | 1.467391304 |
| RHOBTB31          | 1.01E-36 | 0.5951726 | 0.242 | 0.127 | 2.42E-32 | 2.2 | RHOBTB3   | 1.905511811 |
| NCKAP5            | 1.44E-36 | 0.5338854 | 0.301 | 0.171 | 3.47E-32 | 2.2 | NCKAP5    | 1.760233918 |
| MAFB              | 1.52E-36 | 0.4420912 | 0.122 | 0.045 | 3.66E-32 | 2.2 | MAFB      | 2.711111111 |
| OLA11             | 2.29E-36 | 0.6174594 | 0.441 | 0.318 | 5.52E-32 | 2.2 | OLA1      | 1.386792453 |
| ENTPD3-AS1        | 2.39E-36 | 0.2906144 | 0.079 | 0.022 | 5.76E-32 | 2.2 | ENTPD3-AS | 3.590909091 |
| STOM1             | 2.48E-36 | 0.6066981 | 0.387 | 0.255 | 5.98E-32 | 2.2 | STOM      | 1.517647059 |
| FGF141            | 2.74E-36 | 0.5238149 | 0.183 | 0.082 | 6.60E-32 | 2.2 | FGF14     | 2.231707317 |
| WDR61             | 3.57E-36 | 0.5079973 | 0.214 | 0.108 | 8.61E-32 | 2.2 | WDR61     | 1.981481481 |
| CYCS3             | 5.07E-36 | 0.6492672 | 0.61  | 0.516 | 1.22E-31 | 2.2 | CYCS      | 1.182170543 |
| NR4A11            | 5.48E-36 | 0.4357754 | 0.111 | 0.039 | 1.32E-31 | 2.2 | NR4A1     | 2.846153846 |
| LL22NC03-104C7.11 | 5.55E-36 | 0.1116972 | 0.03  | 0.004 | 1.34E-31 | 2.2 | LL22NC03- | 7.5         |
| MRPL511           | 6.15E-36 | 0.6194357 | 0.524 | 0.429 | 1.48E-31 | 2.2 | MRPL51    | 1.221445221 |
| ATF7IP2           | 8.07E-36 | 0.4743791 | 0.112 | 0.04  | 1.95E-31 | 2.2 | ATF7IP2   | 2.8         |
| PPP2R2A2          | 1.31E-35 | 0.5566734 | 0.624 | 0.526 | 3.15E-31 | 2.2 | PPP2R2A   | 1.186311787 |
| ACO20571.3        | 1.38E-35 | 0.1196848 | 0.026 | 0.003 | 3.34E-31 | 2.2 | ACO20571. | 8.666666667 |
| DYNC1I2           | 1.65E-35 | 0.6364816 | 0.481 | 0.377 | 3.98E-31 | 2.2 | DYNC1I2   | 1.275862069 |
| SETD52            | 3.11E-35 | 0.6608089 | 0.593 | 0.524 | 7.50E-31 | 2.2 | SETD5     | 1.131679389 |



|              |          |           |       |       |          |     |            |             |
|--------------|----------|-----------|-------|-------|----------|-----|------------|-------------|
| AC018890.61  | 3.83E-35 | 0.6297416 | 0.354 | 0.233 | 9.22E-31 | 2.2 | AC018890.1 | 1.519313305 |
| WDR433       | 4.93E-35 | 0.6113126 | 0.203 | 0.102 | 1.19E-30 | 2.2 | WDR43      | 1.990196078 |
| SCGB1D21     | 5.02E-35 | 0.5191684 | 0.226 | 0.113 | 1.21E-30 | 2.2 | SCGB1D2    | 2           |
| KCNK6        | 6.74E-35 | 0.3882233 | 0.114 | 0.041 | 1.63E-30 | 2.2 | KCNK6      | 2.780487805 |
| DNAJB1       | 7.71E-35 | 0.6564631 | 0.219 | 0.115 | 1.86E-30 | 2.2 | DNAJB1     | 1.904347826 |
| ZBTB101      | 1.12E-34 | 0.6743241 | 0.373 | 0.251 | 2.70E-30 | 2.2 | ZBTB10     | 1.486055777 |
| ARSD         | 1.14E-34 | 0.3786998 | 0.121 | 0.046 | 2.74E-30 | 2.2 | ARSD       | 2.630434783 |
| DYNLL12      | 1.43E-34 | 0.580098  | 0.362 | 0.238 | 3.44E-30 | 2.2 | DYNLL1     | 1.521008403 |
| AKAP131      | 1.44E-34 | 0.6299689 | 0.664 | 0.609 | 3.47E-30 | 2.2 | AKAP13     | 1.090311987 |
| IL1R1        | 2.04E-34 | 0.4341013 | 0.155 | 0.067 | 4.92E-30 | 2.2 | IL1R1      | 2.313432836 |
| SNX5         | 2.58E-34 | 0.4197075 | 0.147 | 0.062 | 6.21E-30 | 2.2 | SNX5       | 2.370967742 |
| DHFR3        | 2.97E-34 | 0.5498354 | 0.857 | 0.786 | 7.16E-30 | 2.2 | DHFR       | 1.090330789 |
| RP11-6N13.1  | 3.58E-34 | 0.4262962 | 0.114 | 0.041 | 8.64E-30 | 2.2 | RP11-6N13  | 2.780487805 |
| PIAS11       | 4.61E-34 | 0.647302  | 0.558 | 0.482 | 1.11E-29 | 2.2 | PIAS1      | 1.157676349 |
| AZIN11       | 5.84E-34 | 0.6124914 | 0.318 | 0.199 | 1.41E-29 | 2.2 | AZIN1      | 1.59798995  |
| SCN9A1       | 6.03E-34 | 0.1957788 | 0.046 | 0.009 | 1.45E-29 | 2.2 | SCN9A      | 5.111111111 |
| ARHGEF382    | 6.03E-34 | 0.6831032 | 0.566 | 0.481 | 1.46E-29 | 2.2 | ARHGEF38   | 1.176715177 |
| DTNA2        | 6.19E-34 | 0.6957895 | 0.766 | 0.758 | 1.49E-29 | 2.2 | DTNA       | 1.01055409  |
| CLIC6        | 7.66E-34 | 0.7093657 | 0.333 | 0.212 | 1.85E-29 | 2.2 | CLIC6      | 1.570754717 |
| CERS61       | 8.66E-34 | 0.609907  | 0.276 | 0.16  | 2.09E-29 | 2.2 | CERS6      | 1.725       |
| EMP2         | 9.29E-34 | 0.4637692 | 0.225 | 0.117 | 2.24E-29 | 2.2 | EMP2       | 1.923076923 |
| ALCAM1       | 3.48E-33 | 0.3861185 | 0.655 | 0.504 | 8.38E-29 | 2.2 | ALCAM      | 1.299603175 |
| GATM         | 7.71E-33 | 0.2361098 | 0.065 | 0.017 | 1.86E-28 | 2.2 | GATM       | 3.823529412 |
| SPA17        | 1.60E-32 | 0.3329389 | 0.098 | 0.034 | 3.86E-28 | 2.2 | SPA17      | 2.882352941 |
| CREB3L4      | 2.67E-32 | 0.2167421 | 0.047 | 0.01  | 6.45E-28 | 2.2 | CREB3L4    | 4.7         |
| ZFAND31      | 3.72E-32 | 0.5240355 | 0.772 | 0.761 | 8.96E-28 | 2.2 | ZFAND3     | 1.014454665 |
| ELP21        | 4.05E-32 | 0.5588577 | 0.326 | 0.209 | 9.75E-28 | 2.2 | ELP2       | 1.559808612 |
| DIO1         | 4.26E-32 | 0.4490685 | 0.051 | 0.011 | 1.03E-27 | 2.2 | DIO1       | 4.636363636 |
| CCDC102B     | 4.38E-32 | 0.3103508 | 0.087 | 0.028 | 1.06E-27 | 2.2 | CCDC102B   | 3.107142857 |
| VTCN1        | 5.27E-32 | 0.5698235 | 0.203 | 0.104 | 1.27E-27 | 2.2 | VTCN1      | 1.951923077 |
| HPGD1        | 7.13E-32 | 0.1898892 | 0.047 | 0.01  | 1.72E-27 | 2.2 | HPGD       | 4.7         |
| LINC015501   | 7.98E-32 | 0.1109116 | 0.027 | 0.003 | 1.92E-27 | 2.2 | LINC01550  | 9           |
| DNAJC31      | 8.10E-32 | 0.5815872 | 0.369 | 0.254 | 1.95E-27 | 2.2 | DNAJC3     | 1.452755906 |
| GOLGA42      | 9.09E-32 | 0.5740246 | 0.663 | 0.619 | 2.19E-27 | 2.2 | GOLGA4     | 1.071082391 |
| TCEA21       | 1.14E-31 | 0.4430986 | 0.055 | 0.013 | 2.76E-27 | 2.2 | TCEA2      | 4.230769231 |
| RASEF1       | 1.26E-31 | 0.5949576 | 0.391 | 0.266 | 3.05E-27 | 2.2 | RASEF      | 1.469924812 |
| IL1RN1       | 1.35E-31 | 0.3475598 | 0.121 | 0.047 | 3.26E-27 | 2.2 | IL1RN      | 2.574468085 |
| TSPAN131     | 1.38E-31 | 0.4815272 | 0.207 | 0.108 | 3.32E-27 | 2.2 | TSPAN13    | 1.916666667 |
| TXNDC17      | 2.04E-31 | 0.4225657 | 0.147 | 0.066 | 4.91E-27 | 2.2 | TXNDC17    | 2.227272727 |
| RP4-568C11.4 | 2.05E-31 | 0.3280163 | 0.104 | 0.038 | 4.94E-27 | 2.2 | RP4-568C1  | 2.736842105 |
| TFAP2B       | 2.07E-31 | 0.3685932 | 0.144 | 0.062 | 4.99E-27 | 2.2 | TFAP2B     | 2.322580645 |
| ZFAND2A1     | 2.54E-31 | 0.418729  | 0.1   | 0.036 | 6.14E-27 | 2.2 | ZFAND2A    | 2.777777778 |
| MGST23       | 3.11E-31 | 0.4921079 | 0.257 | 0.15  | 7.49E-27 | 2.2 | MGST2      | 1.713333333 |
| MREG1        | 3.23E-31 | 0.5285245 | 0.242 | 0.136 | 7.79E-27 | 2.2 | MREG       | 1.779411765 |
| C2orf742     | 3.25E-31 | 0.3386804 | 0.093 | 0.032 | 7.83E-27 | 2.2 | C2orf74    | 2.90625     |
| APLP21       | 3.68E-31 | 0.4873976 | 0.397 | 0.272 | 8.88E-27 | 2.2 | APLP2      | 1.459558824 |
| PLEKHA74     | 3.92E-31 | 0.2511013 | 0.983 | 0.979 | 9.46E-27 | 2.2 | PLEKHA7    | 1.004085802 |
| MRPS21       | 4.29E-31 | 0.5592997 | 0.581 | 0.515 | 1.04E-26 | 2.2 | MRPS21     | 1.12815534  |
| ITGA101      | 6.43E-31 | 0.4121479 | 0.123 | 0.05  | 1.55E-26 | 2.2 | ITGA10     | 2.46        |
| ANAPC131     | 7.20E-31 | 0.5109929 | 0.245 | 0.141 | 1.74E-26 | 2.2 | ANAPC13    | 1.737588652 |
| UGDH-AS11    | 9.22E-31 | 0.6812606 | 0.201 | 0.105 | 2.22E-26 | 2.2 | UGDH-AS1   | 1.914285714 |
| FAM210B1     | 1.24E-30 | 0.391874  | 0.136 | 0.059 | 3.00E-26 | 2.2 | FAM210B    | 2.305084746 |

|               |          |           |       |       |          |     |           |             |
|---------------|----------|-----------|-------|-------|----------|-----|-----------|-------------|
| CTD-2336O2.11 | 1.52E-30 | 0.1888699 | 0.041 | 0.008 | 3.67E-26 | 2.2 | CTD-2336C | 5.125       |
| STK32B        | 1.69E-30 | 0.3025977 | 0.072 | 0.021 | 4.07E-26 | 2.2 | STK32B    | 3.428571429 |
| CSPP11        | 1.96E-30 | 0.5504772 | 0.281 | 0.172 | 4.72E-26 | 2.2 | CSPP1     | 1.63372093  |
| TBC1D41       | 2.12E-30 | 0.5684943 | 0.302 | 0.19  | 5.10E-26 | 2.2 | TBC1D4    | 1.589473684 |
| PRPS21        | 2.40E-30 | 0.4144741 | 0.164 | 0.077 | 5.79E-26 | 2.2 | PRPS2     | 2.12987013  |
| POLR2K        | 2.41E-30 | 0.586991  | 0.462 | 0.365 | 5.82E-26 | 2.2 | POLR2K    | 1.265753425 |
| CTA-392E5.11  | 5.42E-30 | 0.5010328 | 0.088 | 0.03  | 1.31E-25 | 2.2 | CTA-392E5 | 2.933333333 |
| LINGO12       | 6.86E-30 | 0.3949583 | 0.875 | 0.89  | 1.65E-25 | 2.2 | LINGO1    | 0.983146067 |
| ASTN21        | 9.09E-30 | 0.6108706 | 0.382 | 0.268 | 2.19E-25 | 2.2 | ASTN2     | 1.425373134 |
| SC5D1         | 1.87E-29 | 0.532628  | 0.29  | 0.178 | 4.51E-25 | 2.2 | SC5D      | 1.629213483 |
| HNRNPM1       | 2.10E-29 | 0.5544301 | 0.369 | 0.257 | 5.06E-25 | 2.2 | HNRNPM    | 1.435797665 |
| ESR11         | 2.14E-29 | 0.5270251 | 0.291 | 0.18  | 5.17E-25 | 2.2 | ESR1      | 1.616666667 |
| FAM81B1       | 2.30E-29 | 0.2092899 | 0.056 | 0.014 | 5.54E-25 | 2.2 | FAM81B    | 4           |
| NPFFR21       | 2.46E-29 | 0.3376631 | 0.074 | 0.023 | 5.94E-25 | 2.2 | NPFFR2    | 3.217391304 |
| DMXL11        | 2.98E-29 | 0.5275639 | 0.267 | 0.162 | 7.19E-25 | 2.2 | DMXL1     | 1.648148148 |
| CRNDE1        | 3.95E-29 | 0.4731152 | 0.19  | 0.099 | 9.52E-25 | 2.2 | CRNDE     | 1.919191919 |
| RAB301        | 4.34E-29 | 0.6034283 | 0.214 | 0.117 | 1.05E-24 | 2.2 | RAB30     | 1.829059829 |
| ERO1B1        | 1.42E-28 | 0.5090085 | 0.183 | 0.093 | 3.43E-24 | 2.2 | ERO1B     | 1.967741935 |
| ATP5H2        | 1.54E-28 | 0.5817733 | 0.44  | 0.345 | 3.71E-24 | 2.2 | ATP5H     | 1.275362319 |
| MEGF91        | 1.79E-28 | 0.546204  | 0.228 | 0.128 | 4.31E-24 | 2.2 | MEGF9     | 1.78125     |
| ECE11         | 1.83E-28 | 0.5371629 | 0.291 | 0.182 | 4.42E-24 | 2.2 | ECE1      | 1.598901099 |
| TMPRSS11E     | 2.10E-28 | 0.3597891 | 0.122 | 0.05  | 5.07E-24 | 2.2 | TMPRSS11I | 2.44        |
| RBM472        | 2.34E-28 | 0.5053207 | 0.698 | 0.634 | 5.65E-24 | 2.2 | RBM47     | 1.100946372 |
| NOTCH21       | 3.54E-28 | 0.5847295 | 0.337 | 0.234 | 8.53E-24 | 2.2 | NOTCH2    | 1.44017094  |
| MBNL21        | 5.00E-28 | 0.5584644 | 0.61  | 0.54  | 1.20E-23 | 2.2 | MBNL2     | 1.12962963  |
| SSX2IP        | 5.40E-28 | 0.2329308 | 0.055 | 0.015 | 1.30E-23 | 2.2 | SSX2IP    | 3.666666667 |
| DUSP101       | 6.00E-28 | 0.4948841 | 0.334 | 0.219 | 1.45E-23 | 2.2 | DUSP10    | 1.525114155 |
| USMG51        | 6.12E-28 | 0.4846672 | 0.677 | 0.627 | 1.48E-23 | 2.2 | USMG5     | 1.079744817 |
| MORF4L23      | 6.35E-28 | 0.3931311 | 0.768 | 0.741 | 1.53E-23 | 2.2 | MORF4L2   | 1.036437247 |
| HSP90B12      | 7.49E-28 | 0.3473885 | 0.609 | 0.502 | 1.81E-23 | 2.2 | HSP90B1   | 1.21314741  |
| HSPB11        | 8.32E-28 | 0.4499174 | 0.186 | 0.097 | 2.01E-23 | 2.2 | HSPB11    | 1.917525773 |
| ERP441        | 9.89E-28 | 0.540194  | 0.235 | 0.138 | 2.39E-23 | 2.2 | ERP44     | 1.702898551 |
| ACADM         | 1.02E-27 | 0.4171869 | 0.162 | 0.079 | 2.45E-23 | 2.2 | ACADM     | 2.050632911 |
| CAPN81        | 1.05E-27 | 0.4727249 | 0.332 | 0.213 | 2.53E-23 | 2.2 | CAPN8     | 1.558685446 |
| MAPK81        | 1.77E-27 | 0.6170178 | 0.433 | 0.329 | 4.26E-23 | 2.2 | MAPK8     | 1.316109422 |
| COMMD63       | 2.59E-27 | 0.5320175 | 0.444 | 0.35  | 6.24E-23 | 2.2 | COMMD6    | 1.268571429 |
| MAOA1         | 2.67E-27 | 0.3307895 | 0.126 | 0.054 | 6.44E-23 | 2.2 | MAOA      | 2.333333333 |
| RAB7A1        | 3.29E-27 | 0.5668505 | 0.523 | 0.449 | 7.94E-23 | 2.2 | RAB7A     | 1.16481069  |
| ALG8          | 3.95E-27 | 0.3307568 | 0.105 | 0.042 | 9.53E-23 | 2.2 | ALG8      | 2.5         |
| BCL2L15       | 4.89E-27 | 0.1341834 | 0.028 | 0.004 | 1.18E-22 | 2.2 | BCL2L15   | 7           |
| ABCD31        | 4.92E-27 | 0.5131925 | 0.278 | 0.175 | 1.19E-22 | 2.2 | ABCD3     | 1.588571429 |
| MRPL402       | 9.19E-27 | 0.4260379 | 0.174 | 0.09  | 2.22E-22 | 2.2 | MRPL40    | 1.933333333 |
| NUDT4         | 1.14E-26 | 0.4053174 | 0.147 | 0.069 | 2.75E-22 | 2.2 | NUDT4     | 2.130434783 |
| FAM198B       | 1.94E-26 | 0.1323902 | 0.028 | 0.004 | 4.68E-22 | 2.2 | FAM198B   | 7           |
| HMGN22        | 1.95E-26 | 0.3727927 | 0.122 | 0.053 | 4.71E-22 | 2.2 | HMGN2     | 2.301886792 |
| CDC14A1       | 2.36E-26 | 0.5533393 | 0.256 | 0.156 | 5.69E-22 | 2.2 | CDC14A    | 1.641025641 |
| NDUFA121      | 2.44E-26 | 0.5343266 | 0.306 | 0.206 | 5.88E-22 | 2.2 | NDUFA12   | 1.485436893 |
| LINC002901    | 3.59E-26 | 0.4483428 | 0.079 | 0.027 | 8.65E-22 | 2.2 | LINC00290 | 2.925925926 |
| DDB11         | 3.67E-26 | 0.4806808 | 0.216 | 0.124 | 8.84E-22 | 2.2 | DDB1      | 1.741935484 |
| LARP1B1       | 3.80E-26 | 0.5963433 | 0.316 | 0.212 | 9.17E-22 | 2.2 | LARP1B    | 1.490566038 |
| HNRNPA2B12    | 4.46E-26 | 0.4955788 | 0.493 | 0.409 | 1.08E-21 | 2.2 | HNRNPA2B  | 1.205378973 |
| LMCD11        | 7.14E-26 | 0.5472722 | 0.195 | 0.104 | 1.72E-21 | 2.2 | LMCD1     | 1.875       |

|               |          |           |       |       |          |     |            |             |
|---------------|----------|-----------|-------|-------|----------|-----|------------|-------------|
| DRAIC         | 7.82E-26 | 0.2126721 | 0.051 | 0.013 | 1.89E-21 | 2.2 | DRAIC      | 3.923076923 |
| MYB1          | 8.70E-26 | 0.2463373 | 0.065 | 0.02  | 2.10E-21 | 2.2 | MYB        | 3.25        |
| ELF11         | 1.15E-25 | 0.503262  | 0.595 | 0.526 | 2.78E-21 | 2.2 | ELF1       | 1.131178707 |
| NIT21         | 1.29E-25 | 0.4204065 | 0.188 | 0.102 | 3.12E-21 | 2.2 | NIT2       | 1.843137255 |
| LRIG12        | 1.53E-25 | 0.4961086 | 0.33  | 0.224 | 3.70E-21 | 2.2 | LRIG1      | 1.473214286 |
| SPTSSB        | 1.74E-25 | 0.4791439 | 0.169 | 0.086 | 4.19E-21 | 2.2 | SPTSSB     | 1.965116279 |
| NDUFB9        | 1.93E-25 | 0.6493735 | 0.314 | 0.218 | 4.65E-21 | 2.2 | NDUFB9     | 1.440366972 |
| CHMP4B1       | 2.05E-25 | 0.5004547 | 0.288 | 0.187 | 4.94E-21 | 2.2 | CHMP4B     | 1.540106952 |
| LEMD31        | 2.10E-25 | 0.418372  | 0.169 | 0.087 | 5.06E-21 | 2.2 | LEMD3      | 1.942528736 |
| SEPT4-AS12    | 4.35E-25 | 0.1420618 | 0.037 | 0.008 | 1.05E-20 | 2.2 | SEPT4-AS1  | 4.625       |
| RP3-523E19.21 | 4.73E-25 | 0.3141707 | 0.099 | 0.039 | 1.14E-20 | 2.2 | RP3-523E1  | 2.538461538 |
| MARCH62       | 4.91E-25 | 0.4815336 | 0.484 | 0.397 | 1.18E-20 | 2.2 | MARCH6     | 1.219143577 |
| YWHAE1        | 5.31E-25 | 0.4325911 | 0.672 | 0.626 | 1.28E-20 | 2.2 | YWHAE      | 1.073482428 |
| LINC009982    | 5.86E-25 | 0.4483361 | 0.214 | 0.125 | 1.41E-20 | 2.2 | LINC00998  | 1.712       |
| IGFL4         | 6.17E-25 | 0.4846508 | 0.044 | 0.011 | 1.49E-20 | 2.2 | IGFL4      | 4           |
| HSPA41        | 7.72E-25 | 0.573581  | 0.228 | 0.137 | 1.86E-20 | 2.2 | HSPA4      | 1.664233577 |
| RPS27L1       | 8.96E-25 | 0.4329225 | 0.598 | 0.513 | 2.16E-20 | 2.2 | RPS27L     | 1.165692008 |
| C4orf33       | 9.51E-25 | 0.1791314 | 0.049 | 0.013 | 2.29E-20 | 2.2 | C4orf33    | 3.769230769 |
| UBXN81        | 1.01E-24 | 0.2061108 | 0.068 | 0.022 | 2.43E-20 | 2.2 | UBXN8      | 3.090909091 |
| APOD          | 1.11E-24 | 0.8692256 | 0.118 | 0.052 | 2.69E-20 | 2.2 | APOD       | 2.269230769 |
| ERLIN2        | 1.15E-24 | 0.313235  | 0.104 | 0.043 | 2.76E-20 | 2.2 | ERLIN2     | 2.418604651 |
| RASSF6        | 1.27E-24 | 0.3913661 | 0.139 | 0.066 | 3.06E-20 | 2.2 | RASSF6     | 2.106060606 |
| ZNF385B1      | 1.32E-24 | 0.2816932 | 0.058 | 0.017 | 3.18E-20 | 2.2 | ZNF385B    | 3.411764706 |
| ASAH11        | 1.83E-24 | 0.3813007 | 0.182 | 0.098 | 4.41E-20 | 2.2 | ASAH1      | 1.857142857 |
| COL4A51       | 2.07E-24 | 0.4823552 | 0.321 | 0.215 | 4.99E-20 | 2.2 | COL4A5     | 1.493023256 |
| ABCC81        | 2.19E-24 | 0.1568598 | 0.031 | 0.006 | 5.29E-20 | 2.2 | ABCC8      | 5.166666667 |
| FAM234B1      | 2.29E-24 | 0.3208672 | 0.106 | 0.045 | 5.53E-20 | 2.2 | FAM234B    | 2.355555556 |
| UCP2          | 2.43E-24 | 0.2581491 | 0.084 | 0.031 | 5.87E-20 | 2.2 | UCP2       | 2.709677419 |
| IQCJ-SCHIP1   | 3.44E-24 | 0.582567  | 0.175 | 0.094 | 8.30E-20 | 2.2 | IQCJ-SCHIP | 1.861702128 |
| CNDP21        | 4.35E-24 | 0.481142  | 0.207 | 0.121 | 1.05E-19 | 2.2 | CNDP2      | 1.710743802 |
| SEL1L4        | 8.60E-24 | 0.3989594 | 0.181 | 0.098 | 2.07E-19 | 2.2 | SEL1L      | 1.846938776 |
| PBDC1         | 9.39E-24 | 0.4949907 | 0.215 | 0.13  | 2.26E-19 | 2.2 | PBDC1      | 1.653846154 |
| TAT           | 1.11E-23 | 0.2563976 | 0.041 | 0.01  | 2.67E-19 | 2.2 | TAT        | 4.1         |
| RNF2201       | 1.51E-23 | 1.06881   | 0.14  | 0.07  | 3.64E-19 | 2.2 | RNF220     | 2           |
| RPS294        | 1.56E-23 | 0.3328221 | 0.917 | 0.925 | 3.77E-19 | 2.2 | RPS29      | 0.991351351 |
| HMGN32        | 1.57E-23 | 0.4206248 | 0.201 | 0.115 | 3.78E-19 | 2.2 | HMGN3      | 1.747826087 |
| RP5-857K21.4  | 1.74E-23 | 0.5742415 | 0.501 | 0.431 | 4.19E-19 | 2.2 | RP5-857K2  | 1.162412993 |
| TMEM2582      | 2.02E-23 | 0.4481449 | 0.638 | 0.598 | 4.88E-19 | 2.2 | TMEM258    | 1.066889632 |
| RBM34         | 2.35E-23 | 0.4540956 | 0.487 | 0.403 | 5.66E-19 | 2.2 | RBM3       | 1.208436725 |
| PPP1R1B2      | 3.11E-23 | 0.2750115 | 0.082 | 0.031 | 7.50E-19 | 2.2 | PPP1R1B    | 2.64516129  |
| PEBP11        | 3.37E-23 | 0.4906344 | 0.26  | 0.169 | 8.12E-19 | 2.2 | PEBP1      | 1.538461538 |
| TMEM2301      | 3.45E-23 | 0.3616577 | 0.161 | 0.085 | 8.32E-19 | 2.2 | TMEM230    | 1.894117647 |
| MACF11        | 4.29E-23 | 0.4961893 | 0.732 | 0.721 | 1.03E-18 | 2.2 | MACF1      | 1.015256588 |
| LINC00467     | 4.50E-23 | 0.2431983 | 0.076 | 0.027 | 1.09E-18 | 2.2 | LINC00467  | 2.814814815 |
| DTWD21        | 4.84E-23 | 0.3005891 | 0.11  | 0.048 | 1.17E-18 | 2.2 | DTWD2      | 2.291666667 |
| NUDT12        | 5.04E-23 | 0.3381387 | 0.093 | 0.038 | 1.21E-18 | 2.2 | NUDT12     | 2.447368421 |
| KLF121        | 6.71E-23 | 0.5119854 | 0.235 | 0.143 | 1.62E-18 | 2.2 | KLF12      | 1.643356643 |
| WAC2          | 8.84E-23 | 0.4589453 | 0.65  | 0.628 | 2.13E-18 | 2.2 | WAC        | 1.035031847 |
| GABARAP1      | 9.04E-23 | 0.5029836 | 0.443 | 0.358 | 2.18E-18 | 2.2 | GABARAP    | 1.237430168 |
| SNX14         | 9.07E-23 | 0.4595086 | 0.248 | 0.157 | 2.19E-18 | 2.2 | SNX1       | 1.579617834 |
| GREB13        | 1.02E-22 | 0.28141   | 0.14  | 0.068 | 2.45E-18 | 2.2 | GREB1      | 2.058823529 |
| KIF16B1       | 1.67E-22 | 0.460759  | 0.274 | 0.182 | 4.02E-18 | 2.2 | KIF16B     | 1.505494505 |

|            |          |           |       |       |          |     |           |             |
|------------|----------|-----------|-------|-------|----------|-----|-----------|-------------|
| MT1A1      | 1.89E-22 | 0.4178629 | 0.052 | 0.015 | 4.56E-18 | 2.2 | MT1A      | 3.466666667 |
| GUSB1      | 1.96E-22 | 0.2805282 | 0.101 | 0.043 | 4.73E-18 | 2.2 | GUSB      | 2.348837209 |
| SERPINA111 | 2.08E-22 | 0.282563  | 0.083 | 0.032 | 5.01E-18 | 2.2 | SERPINA11 | 2.59375     |
| HNRNPA14   | 2.81E-22 | 0.1828539 | 0.833 | 0.754 | 6.77E-18 | 2.2 | HNRNPA1   | 1.104774536 |
| ATP6V1G11  | 2.89E-22 | 0.4855644 | 0.465 | 0.387 | 6.96E-18 | 2.2 | ATP6V1G1  | 1.201550388 |
| GFM1       | 2.92E-22 | 0.3228672 | 0.112 | 0.051 | 7.03E-18 | 2.2 | GFM1      | 2.196078431 |
| GSTM41     | 3.39E-22 | 0.1256344 | 0.034 | 0.008 | 8.17E-18 | 2.2 | GSTM4     | 4.25        |
| PDK41      | 3.51E-22 | 0.4758444 | 0.149 | 0.076 | 8.46E-18 | 2.2 | PDK4      | 1.960526316 |
| PAN31      | 3.55E-22 | 0.5220071 | 0.646 | 0.639 | 8.57E-18 | 2.2 | PAN3      | 1.010954617 |
| C18orf32   | 3.73E-22 | 0.4469644 | 0.241 | 0.15  | 8.98E-18 | 2.2 | C18orf32  | 1.606666667 |
| RAB182     | 5.62E-22 | 0.4862584 | 0.42  | 0.336 | 1.35E-17 | 2.2 | RAB18     | 1.25        |
| ANAPC163   | 5.97E-22 | 0.4880307 | 0.332 | 0.242 | 1.44E-17 | 2.2 | ANAPC16   | 1.371900826 |
| PNPLA4     | 7.17E-22 | 0.2016969 | 0.068 | 0.024 | 1.73E-17 | 2.2 | PNPLA4    | 2.833333333 |
| MEAF62     | 9.33E-22 | 0.4048915 | 0.257 | 0.164 | 2.25E-17 | 2.2 | MEAF6     | 1.567073171 |
| SLC50A1    | 1.14E-21 | 0.3018073 | 0.096 | 0.041 | 2.74E-17 | 2.2 | SLC50A1   | 2.341463415 |
| TMEM26     | 1.29E-21 | 0.1210939 | 0.032 | 0.007 | 3.12E-17 | 2.2 | TMEM26    | 4.571428571 |
| ERVK3-1    | 1.40E-21 | 0.2443024 | 0.084 | 0.033 | 3.38E-17 | 2.2 | ERVK3-1   | 2.545454545 |
| HERPUD12   | 1.44E-21 | 0.4872166 | 0.313 | 0.219 | 3.47E-17 | 2.2 | HERPUD1   | 1.429223744 |
| DLG5       | 1.44E-21 | 0.465318  | 0.361 | 0.258 | 3.48E-17 | 2.2 | DLG5      | 1.399224806 |
| SCOC2      | 1.49E-21 | 0.4873286 | 0.327 | 0.236 | 3.59E-17 | 2.2 | SCOC      | 1.38559322  |
| DYX1C1     | 1.55E-21 | 0.245178  | 0.067 | 0.024 | 3.75E-17 | 2.2 | DYX1C1    | 2.791666667 |
| RAB2A1     | 1.78E-21 | 0.5210404 | 0.391 | 0.309 | 4.29E-17 | 2.2 | RAB2A     | 1.265372168 |
| RPL26L11   | 1.96E-21 | 0.4881598 | 0.242 | 0.158 | 4.72E-17 | 2.2 | RPL26L1   | 1.53164557  |
| RORA       | 2.07E-21 | 0.4056047 | 0.644 | 0.57  | 5.00E-17 | 2.2 | RORA      | 1.129824561 |
| FNIP21     | 2.47E-21 | 0.4734092 | 0.184 | 0.104 | 5.95E-17 | 2.2 | FNIP2     | 1.769230769 |
| ATP6V1C11  | 3.22E-21 | 0.448207  | 0.211 | 0.129 | 7.75E-17 | 2.2 | ATP6V1C1  | 1.635658915 |
| FAM104B    | 3.25E-21 | 0.3158704 | 0.097 | 0.042 | 7.84E-17 | 2.2 | FAM104B   | 2.30952381  |
| PPM1K1     | 3.51E-21 | 0.4588451 | 0.233 | 0.146 | 8.47E-17 | 2.2 | PPM1K     | 1.595890411 |
| CD631      | 3.67E-21 | 0.4779891 | 0.471 | 0.378 | 8.85E-17 | 2.2 | CD63      | 1.246031746 |
| TBC1D10A1  | 3.74E-21 | 0.8937604 | 0.238 | 0.151 | 9.02E-17 | 2.2 | TBC1D10A  | 1.57615894  |
| HNMT       | 4.14E-21 | 0.4154544 | 0.387 | 0.291 | 9.98E-17 | 2.2 | HNMT      | 1.329896907 |
| RPL384     | 5.18E-21 | 0.2662882 | 0.902 | 0.891 | 1.25E-16 | 2.2 | RPL38     | 1.012345679 |
| RLF2       | 6.29E-21 | 0.5297472 | 0.428 | 0.343 | 1.52E-16 | 2.2 | RLF       | 1.247813411 |
| MYCBP1     | 7.48E-21 | 0.1925561 | 0.059 | 0.02  | 1.80E-16 | 2.2 | MYCBP     | 2.95        |
| CHD11      | 8.52E-21 | 0.5326959 | 0.355 | 0.266 | 2.05E-16 | 2.2 | CHD1      | 1.334586466 |
| DNAJC19    | 8.86E-21 | 0.2306289 | 0.071 | 0.026 | 2.14E-16 | 2.2 | DNAJC19   | 2.730769231 |
| GALNT71    | 9.07E-21 | 0.4806462 | 0.243 | 0.157 | 2.19E-16 | 2.2 | GALNT7    | 1.547770701 |
| KDM6A1     | 1.09E-20 | 0.6009523 | 0.438 | 0.364 | 2.63E-16 | 2.2 | KDM6A     | 1.203296703 |
| TMEM981    | 1.28E-20 | 0.1308623 | 0.034 | 0.008 | 3.07E-16 | 2.2 | TMEM98    | 4.25        |
| FOXA11     | 1.28E-20 | 0.4040278 | 0.196 | 0.115 | 3.09E-16 | 2.2 | FOXA1     | 1.704347826 |
| LAMA11     | 1.59E-20 | 0.5753024 | 0.18  | 0.101 | 3.83E-16 | 2.2 | LAMA1     | 1.782178218 |
| ALDH6A11   | 2.46E-20 | 0.2082264 | 0.071 | 0.027 | 5.92E-16 | 2.2 | ALDH6A1   | 2.62962963  |
| PUM22      | 3.35E-20 | 0.5200085 | 0.482 | 0.411 | 8.09E-16 | 2.2 | PUM2      | 1.172749392 |
| CAPN131    | 4.00E-20 | 0.2672598 | 0.086 | 0.036 | 9.64E-16 | 2.2 | CAPN13    | 2.388888889 |
| USP471     | 4.77E-20 | 0.4991318 | 0.49  | 0.419 | 1.15E-15 | 2.2 | USP47     | 1.169451074 |
| TAT-AS1    | 6.67E-20 | 0.1497211 | 0.034 | 0.008 | 1.61E-15 | 2.2 | TAT-AS1   | 4.25        |
| TMBIM61    | 6.90E-20 | 0.2733053 | 0.872 | 0.86  | 1.66E-15 | 2.2 | TMBIM6    | 1.013953488 |
| UFC11      | 9.11E-20 | 0.4371136 | 0.539 | 0.482 | 2.20E-15 | 2.2 | UFC1      | 1.118257261 |
| MEF2A2     | 1.08E-19 | 0.5349731 | 0.484 | 0.419 | 2.60E-15 | 2.2 | MEF2A     | 1.155131265 |
| DOCK8      | 1.15E-19 | 0.3098551 | 0.119 | 0.058 | 2.77E-15 | 2.2 | DOCK8     | 2.051724138 |
| HNRNPC2    | 1.52E-19 | 0.3004706 | 0.793 | 0.784 | 3.68E-15 | 2.2 | HNRNPC    | 1.011479592 |
| ECI2       | 2.21E-19 | 0.3725694 | 0.139 | 0.074 | 5.32E-15 | 2.2 | ECI2      | 1.878378378 |

|                |          |           |       |       |          |     |           |             |
|----------------|----------|-----------|-------|-------|----------|-----|-----------|-------------|
| PTGIS          | 2.36E-19 | 0.2243821 | 0.057 | 0.019 | 5.68E-15 | 2.2 | PTGIS     | 3           |
| RHOH           | 2.37E-19 | 0.2691462 | 0.076 | 0.03  | 5.71E-15 | 2.2 | RHOH      | 2.533333333 |
| PPP6R31        | 2.38E-19 | 0.4897306 | 0.549 | 0.507 | 5.73E-15 | 2.2 | PPP6R3    | 1.082840237 |
| DNAH51         | 2.83E-19 | 0.4381198 | 0.128 | 0.065 | 6.83E-15 | 2.2 | DNAH5     | 1.969230769 |
| DICER11        | 3.54E-19 | 0.5274417 | 0.281 | 0.2   | 8.54E-15 | 2.2 | DICER1    | 1.405       |
| AC007682.1     | 4.94E-19 | 0.3100976 | 0.06  | 0.021 | 1.19E-14 | 2.2 | AC007682. | 2.857142857 |
| SLC13A11       | 5.97E-19 | 0.1539788 | 0.044 | 0.013 | 1.44E-14 | 2.2 | SLC13A1   | 3.384615385 |
| ERH2           | 6.90E-19 | 0.496152  | 0.541 | 0.504 | 1.66E-14 | 2.2 | ERH       | 1.073412698 |
| TNC1           | 7.04E-19 | 0.3419013 | 0.434 | 0.327 | 1.70E-14 | 2.2 | TNC       | 1.327217125 |
| ANKRD30B1      | 7.09E-19 | 0.1871806 | 0.054 | 0.018 | 1.71E-14 | 2.2 | ANKRD30B  | 3           |
| RP11-539L10.31 | 7.90E-19 | 0.2229518 | 0.073 | 0.029 | 1.90E-14 | 2.2 | RP11-539L | 2.517241379 |
| RSPH1          | 8.74E-19 | 0.1292939 | 0.035 | 0.009 | 2.11E-14 | 2.2 | RSPH1     | 3.888888889 |
| FSIP2          | 8.78E-19 | 0.1716493 | 0.037 | 0.01  | 2.12E-14 | 2.2 | FSIP2     | 3.7         |
| SPOPL1         | 9.54E-19 | 0.4975424 | 0.341 | 0.257 | 2.30E-14 | 2.2 | SPOPL     | 1.326848249 |
| STAT5A1        | 1.53E-18 | 0.4346258 | 0.263 | 0.177 | 3.69E-14 | 2.2 | STAT5A    | 1.485875706 |
| C15orf65       | 1.60E-18 | 0.1533291 | 0.04  | 0.011 | 3.86E-14 | 2.2 | C15orf65  | 3.636363636 |
| TMEM101        | 1.72E-18 | 0.2001547 | 0.052 | 0.017 | 4.15E-14 | 2.2 | TMEM101   | 3.058823529 |
| HGD1           | 2.64E-18 | 0.1677914 | 0.048 | 0.015 | 6.37E-14 | 2.2 | HGD       | 3.2         |
| JAG11          | 4.25E-18 | 0.2806355 | 0.09  | 0.04  | 1.02E-13 | 2.2 | JAG1      | 2.25        |
| CAT1           | 5.70E-18 | 0.2754558 | 0.103 | 0.049 | 1.38E-13 | 2.2 | CAT       | 2.102040816 |
| COX201         | 5.84E-18 | 0.4032799 | 0.207 | 0.132 | 1.41E-13 | 2.2 | COX20     | 1.568181818 |
| GSPT11         | 6.06E-18 | 0.4038322 | 0.439 | 0.366 | 1.46E-13 | 2.2 | GSPT1     | 1.199453552 |
| RAP1GDS1       | 6.30E-18 | 0.4613279 | 0.196 | 0.122 | 1.52E-13 | 2.2 | RAP1GDS1  | 1.606557377 |
| UBE2G11        | 6.37E-18 | 0.4782324 | 0.335 | 0.253 | 1.54E-13 | 2.2 | UBE2G1    | 1.324110672 |
| APOA1BP1       | 6.99E-18 | 0.2129224 | 0.069 | 0.028 | 1.69E-13 | 2.2 | APOA1BP   | 2.464285714 |
| NOP10          | 7.83E-18 | 0.4288255 | 0.587 | 0.556 | 1.89E-13 | 2.2 | NOP10     | 1.055755396 |
| MARCKSL1       | 8.14E-18 | 0.3689594 | 0.228 | 0.149 | 1.96E-13 | 2.2 | MARCKSL1  | 1.530201342 |
| TGFB3          | 8.85E-18 | 0.1843402 | 0.083 | 0.035 | 2.13E-13 | 2.2 | TGFB3     | 2.371428571 |
| POLR3GL        | 9.60E-18 | 0.1407364 | 0.037 | 0.01  | 2.32E-13 | 2.2 | POLR3GL   | 3.7         |
| NBEAL11        | 1.15E-17 | 0.3034867 | 0.735 | 0.715 | 2.77E-13 | 2.2 | NBEAL1    | 1.027972028 |
| NAA151         | 1.22E-17 | 0.4276426 | 0.214 | 0.139 | 2.94E-13 | 2.2 | NAA15     | 1.539568345 |
| FKBP51         | 1.41E-17 | 0.4028635 | 0.421 | 0.332 | 3.39E-13 | 2.2 | FKBP5     | 1.268072289 |
| SEMA3E1        | 1.73E-17 | 0.4197557 | 0.215 | 0.139 | 4.17E-13 | 2.2 | SEMA3E    | 1.54676259  |
| IRF11          | 1.85E-17 | 0.4859333 | 0.263 | 0.182 | 4.46E-13 | 2.2 | IRF1      | 1.445054945 |
| MED131         | 2.11E-17 | 0.6094276 | 0.454 | 0.397 | 5.08E-13 | 2.2 | MED13     | 1.143576826 |
| SLC26A32       | 2.13E-17 | 0.2550017 | 0.832 | 0.787 | 5.15E-13 | 2.2 | SLC26A3   | 1.057179161 |
| WISP31         | 4.09E-17 | 0.1051963 | 0.027 | 0.006 | 9.86E-13 | 2.2 | WISP3     | 4.5         |
| TBX31          | 4.11E-17 | 0.3121361 | 0.366 | 0.266 | 9.90E-13 | 2.2 | TBX3      | 1.37593985  |
| ATP6AP21       | 4.58E-17 | 0.3480831 | 0.217 | 0.141 | 1.10E-12 | 2.2 | ATP6AP2   | 1.539007092 |
| HIPK21         | 4.68E-17 | 0.3894579 | 0.445 | 0.37  | 1.13E-12 | 2.2 | HIPK2     | 1.202702703 |
| MSRB2          | 4.98E-17 | 0.1412953 | 0.029 | 0.007 | 1.20E-12 | 2.2 | MSRB2     | 4.142857143 |
| ITGB3BP3       | 5.27E-17 | 0.3098954 | 0.139 | 0.076 | 1.27E-12 | 2.2 | ITGB3BP   | 1.828947368 |
| CPEB4          | 5.57E-17 | 0.4965491 | 0.335 | 0.258 | 1.34E-12 | 2.2 | CPEB4     | 1.298449612 |
| ZFP36          | 5.91E-17 | 0.4867835 | 0.186 | 0.114 | 1.43E-12 | 2.2 | ZFP36     | 1.631578947 |
| CD163L12       | 6.12E-17 | 0.2923507 | 0.11  | 0.056 | 1.48E-12 | 2.2 | CD163L1   | 1.964285714 |
| RWDD2B1        | 6.45E-17 | 0.1966919 | 0.058 | 0.022 | 1.56E-12 | 2.2 | RWDD2B    | 2.636363636 |
| AP2B11         | 9.12E-17 | 0.4094385 | 0.214 | 0.14  | 2.20E-12 | 2.2 | AP2B1     | 1.528571429 |
| RHOB           | 9.21E-17 | 0.4184077 | 0.178 | 0.108 | 2.22E-12 | 2.2 | RHOB      | 1.648148148 |
| MAPK101        | 9.94E-17 | 0.2846098 | 0.092 | 0.043 | 2.40E-12 | 2.2 | MAPK10    | 2.139534884 |
| MYO101         | 1.05E-16 | 0.5022715 | 0.327 | 0.25  | 2.53E-12 | 2.2 | MYO10     | 1.308       |
| NCSTN1         | 1.18E-16 | 0.2708851 | 0.103 | 0.051 | 2.84E-12 | 2.2 | NCSTN     | 2.019607843 |
| SDHC2          | 1.39E-16 | 0.3944737 | 0.233 | 0.16  | 3.35E-12 | 2.2 | SDHC      | 1.45625     |

|               |          |           |       |       |          |     |           |             |
|---------------|----------|-----------|-------|-------|----------|-----|-----------|-------------|
| MRPS333       | 1.44E-16 | 0.4290629 | 0.313 | 0.237 | 3.47E-12 | 2.2 | MRPS33    | 1.320675105 |
| NOP581        | 1.48E-16 | 0.5382273 | 0.277 | 0.202 | 3.56E-12 | 2.2 | NOP58     | 1.371287129 |
| TWISTNB       | 1.48E-16 | 0.254761  | 0.075 | 0.032 | 3.56E-12 | 2.2 | TWISTNB   | 2.34375     |
| PDSS11        | 1.53E-16 | 0.3127659 | 0.086 | 0.039 | 3.70E-12 | 2.2 | PDSS1     | 2.205128205 |
| KCTD31        | 1.55E-16 | 0.4022194 | 0.27  | 0.191 | 3.75E-12 | 2.2 | KCTD3     | 1.413612565 |
| GATAD2A1      | 1.80E-16 | 0.4416747 | 0.223 | 0.15  | 4.35E-12 | 2.2 | GATAD2A   | 1.486666667 |
| PIGK          | 1.94E-16 | 0.3416554 | 0.142 | 0.08  | 4.67E-12 | 2.2 | PIGK      | 1.775       |
| HSPA91        | 2.03E-16 | 0.4146274 | 0.289 | 0.213 | 4.90E-12 | 2.2 | HSPA9     | 1.356807512 |
| DACH11        | 2.24E-16 | 0.3730546 | 0.161 | 0.094 | 5.41E-12 | 2.2 | DACH1     | 1.712765957 |
| NEDD92        | 2.25E-16 | 0.4379995 | 0.441 | 0.369 | 5.42E-12 | 2.2 | NEDD9     | 1.195121951 |
| DPY301        | 2.36E-16 | 0.4489255 | 0.248 | 0.177 | 5.70E-12 | 2.2 | DPY30     | 1.401129944 |
| STX181        | 2.71E-16 | 0.4197366 | 0.248 | 0.171 | 6.52E-12 | 2.2 | STX18     | 1.450292398 |
| BTBD71        | 2.94E-16 | 0.5010466 | 0.262 | 0.187 | 7.09E-12 | 2.2 | BTBD7     | 1.401069519 |
| DPCD          | 3.10E-16 | 0.2890091 | 0.143 | 0.081 | 7.47E-12 | 2.2 | DPCD      | 1.765432099 |
| IQUB          | 3.26E-16 | 0.1625411 | 0.04  | 0.012 | 7.87E-12 | 2.2 | IQUB      | 3.333333333 |
| TMEM144       | 3.38E-16 | 0.154288  | 0.047 | 0.016 | 8.14E-12 | 2.2 | TMEM144   | 2.9375      |
| TET1          | 3.50E-16 | 0.3045536 | 0.122 | 0.065 | 8.45E-12 | 2.2 | TET1      | 1.876923077 |
| TOP2B2        | 3.63E-16 | 0.445283  | 0.266 | 0.189 | 8.76E-12 | 2.2 | TOP2B     | 1.407407407 |
| BANF12        | 3.97E-16 | 0.3871759 | 0.252 | 0.177 | 9.57E-12 | 2.2 | BANF1     | 1.423728814 |
| IRS11         | 4.37E-16 | 0.3486251 | 0.157 | 0.092 | 1.05E-11 | 2.2 | IRS1      | 1.706521739 |
| IDH12         | 4.81E-16 | 0.3265924 | 0.139 | 0.078 | 1.16E-11 | 2.2 | IDH1      | 1.782051282 |
| TMEM237       | 5.06E-16 | 0.1286556 | 0.044 | 0.014 | 1.22E-11 | 2.2 | TMEM237   | 3.142857143 |
| RP11-84A19.42 | 5.26E-16 | 0.244849  | 0.104 | 0.052 | 1.27E-11 | 2.2 | RP11-84A1 | 2           |
| PIP4K2C1      | 6.62E-16 | 0.3077103 | 0.135 | 0.075 | 1.60E-11 | 2.2 | PIP4K2C   | 1.8         |
| EID1          | 6.64E-16 | 0.3246564 | 0.138 | 0.078 | 1.60E-11 | 2.2 | EID1      | 1.769230769 |
| PAWR1         | 6.92E-16 | 0.4683487 | 0.584 | 0.549 | 1.67E-11 | 2.2 | PAWR      | 1.063752277 |
| NXPE3         | 8.29E-16 | 0.1755055 | 0.048 | 0.017 | 2.00E-11 | 2.2 | NXPE3     | 2.823529412 |
| JUND1         | 8.45E-16 | 0.3904991 | 0.248 | 0.171 | 2.04E-11 | 2.2 | JUND      | 1.450292398 |
| DNAJB62       | 1.01E-15 | 0.3980464 | 0.445 | 0.38  | 2.43E-11 | 2.2 | DNAJB6    | 1.171052632 |
| ZYG11A1       | 1.11E-15 | 0.1836617 | 0.048 | 0.017 | 2.67E-11 | 2.2 | ZYG11A    | 2.823529412 |
| SELENBP1      | 1.12E-15 | 0.1565044 | 0.044 | 0.015 | 2.70E-11 | 2.2 | SELENBP1  | 2.933333333 |
| PUS7L1        | 1.21E-15 | 0.2179391 | 0.064 | 0.026 | 2.92E-11 | 2.2 | PUS7L     | 2.461538462 |
| NDUFA3        | 1.47E-15 | 0.1417976 | 0.044 | 0.015 | 3.54E-11 | 2.2 | NDUFA3    | 2.933333333 |
| SKP13         | 1.51E-15 | 0.2597481 | 0.814 | 0.807 | 3.63E-11 | 2.2 | SKP1      | 1.008674102 |
| KIF9          | 1.89E-15 | 0.4692832 | 0.132 | 0.073 | 4.56E-11 | 2.2 | KIF9      | 1.808219178 |
| EFNA11        | 2.03E-15 | 0.3922478 | 0.318 | 0.235 | 4.89E-11 | 2.2 | EFNA1     | 1.353191489 |
| GLRX51        | 2.03E-15 | 0.2138344 | 0.074 | 0.033 | 4.89E-11 | 2.2 | GLRX5     | 2.242424242 |
| CMTM61        | 2.05E-15 | 0.464719  | 0.371 | 0.3   | 4.93E-11 | 2.2 | CMTM6     | 1.236666667 |
| NOS1AP1       | 2.06E-15 | 0.5002531 | 0.289 | 0.214 | 4.96E-11 | 2.2 | NOS1AP    | 1.35046729  |
| DYNLRB21      | 2.13E-15 | 0.1106716 | 0.028 | 0.007 | 5.14E-11 | 2.2 | DYNLRB2   | 4           |
| TP53TG1       | 2.32E-15 | 0.1366705 | 0.041 | 0.013 | 5.61E-11 | 2.2 | TP53TG1   | 3.153846154 |
| EAF2          | 2.33E-15 | 0.1908884 | 0.051 | 0.019 | 5.61E-11 | 2.2 | EAF2      | 2.684210526 |
| IL6ST1        | 2.43E-15 | 0.4854209 | 0.392 | 0.331 | 5.86E-11 | 2.2 | IL6ST     | 1.18429003  |
| HDHD2         | 2.77E-15 | 0.1704236 | 0.051 | 0.019 | 6.67E-11 | 2.2 | HDHD2     | 2.684210526 |
| C14orf1662    | 3.26E-15 | 0.4048512 | 0.286 | 0.216 | 7.85E-11 | 2.2 | C14orf166 | 1.324074074 |
| FAM204A       | 3.46E-15 | 0.442936  | 0.291 | 0.218 | 8.33E-11 | 2.2 | FAM204A   | 1.334862385 |
| OSBPL81       | 3.55E-15 | 0.5074325 | 0.309 | 0.236 | 8.56E-11 | 2.2 | OSBPL8    | 1.309322034 |
| OSBPL1A1      | 3.74E-15 | 0.5118877 | 0.24  | 0.169 | 9.02E-11 | 2.2 | OSBPL1A   | 1.420118343 |
| AC104667.31   | 3.75E-15 | 0.159154  | 0.042 | 0.014 | 9.05E-11 | 2.2 | AC104667. | 3           |
| MEA11         | 4.10E-15 | 0.3610518 | 0.18  | 0.116 | 9.88E-11 | 2.2 | MEA1      | 1.551724138 |
| CHMP3         | 4.92E-15 | 0.2983825 | 0.135 | 0.077 | 1.19E-10 | 2.2 | CHMP3     | 1.753246753 |
| BCOR1         | 5.10E-15 | 0.4064939 | 0.571 | 0.51  | 1.23E-10 | 2.2 | BCOR      | 1.119607843 |

|               |          |           |       |       |          |     |            |             |
|---------------|----------|-----------|-------|-------|----------|-----|------------|-------------|
| PIGP2         | 5.78E-15 | 0.3698775 | 0.189 | 0.124 | 1.39E-10 | 2.2 | PIGP       | 1.524193548 |
| FMOD1         | 5.89E-15 | 0.1115694 | 0.028 | 0.007 | 1.42E-10 | 2.2 | FMOD       | 4           |
| CRYZ1         | 5.99E-15 | 0.2112184 | 0.068 | 0.029 | 1.44E-10 | 2.2 | CRYZ       | 2.344827586 |
| METTTL7A1     | 6.04E-15 | 0.2574712 | 0.1   | 0.051 | 1.46E-10 | 2.2 | METTTL7A   | 1.960784314 |
| RERE1         | 6.29E-15 | 0.3501003 | 0.61  | 0.569 | 1.52E-10 | 2.2 | RERE       | 1.072056239 |
| TSPAN151      | 6.32E-15 | 0.3283792 | 0.165 | 0.101 | 1.52E-10 | 2.2 | TSPAN15    | 1.633663366 |
| CST31         | 6.48E-15 | 0.259555  | 0.119 | 0.064 | 1.56E-10 | 2.2 | CST3       | 1.859375    |
| SYT16         | 7.10E-15 | 0.1127941 | 0.023 | 0.005 | 1.71E-10 | 2.2 | SYT16      | 4.6         |
| C2Oorf961     | 8.06E-15 | 0.1881199 | 0.081 | 0.038 | 1.94E-10 | 2.2 | C2Oorf96   | 2.131578947 |
| RAB211        | 8.33E-15 | 0.3768812 | 0.339 | 0.259 | 2.01E-10 | 2.2 | RAB21      | 1.308880309 |
| MUM1L11       | 1.08E-14 | 0.1012978 | 0.023 | 0.005 | 2.59E-10 | 2.2 | MUM1L1     | 4.6         |
| ATP2A2        | 1.10E-14 | 0.4846118 | 0.328 | 0.262 | 2.66E-10 | 2.2 | ATP2A2     | 1.251908397 |
| ARHGEF371     | 1.19E-14 | 0.2908907 | 0.098 | 0.05  | 2.88E-10 | 2.2 | ARHGEF37   | 1.96        |
| TMSB101       | 1.24E-14 | 0.1507821 | 0.761 | 0.732 | 3.00E-10 | 2.2 | TMSB10     | 1.039617486 |
| ATF32         | 1.30E-14 | 0.4292767 | 0.467 | 0.404 | 3.13E-10 | 2.2 | ATF3       | 1.155940594 |
| ARL6IP52      | 1.44E-14 | 0.4119732 | 0.526 | 0.487 | 3.48E-10 | 2.2 | ARL6IP5    | 1.080082136 |
| RP11-60I3.41  | 1.61E-14 | 0.1627117 | 0.058 | 0.023 | 3.88E-10 | 2.2 | RP11-60I3. | 2.52173913  |
| CLDN82        | 1.72E-14 | 0.2805397 | 0.104 | 0.055 | 4.14E-10 | 2.2 | CLDN8      | 1.890909091 |
| CTC-338M12.52 | 1.77E-14 | 0.1087783 | 0.026 | 0.006 | 4.27E-10 | 2.2 | CTC-338M1  | 4.333333333 |
| POLE2         | 1.93E-14 | 0.4338591 | 0.306 | 0.235 | 4.66E-10 | 2.2 | POLE2      | 1.30212766  |
| ACSF2         | 2.32E-14 | 0.2348129 | 0.076 | 0.035 | 5.60E-10 | 2.2 | ACSF2      | 2.171428571 |
| MRPS35        | 2.38E-14 | 0.3011386 | 0.118 | 0.066 | 5.73E-10 | 2.2 | MRPS35     | 1.787878788 |
| H3F3B1        | 2.42E-14 | 0.3133573 | 0.459 | 0.39  | 5.82E-10 | 2.2 | H3F3B      | 1.176923077 |
| TNFRSF10B1    | 2.42E-14 | 0.4435725 | 0.273 | 0.202 | 5.84E-10 | 2.2 | TNFRSF10B  | 1.351485149 |
| AHSA2         | 2.44E-14 | 0.2366897 | 0.068 | 0.03  | 5.89E-10 | 2.2 | AHSA2      | 2.266666667 |
| ARPC31        | 3.00E-14 | 0.3275506 | 0.672 | 0.662 | 7.25E-10 | 2.2 | ARPC3      | 1.01510574  |
| EFHC1         | 3.14E-14 | 0.2897076 | 0.118 | 0.066 | 7.58E-10 | 2.2 | EFHC1      | 1.787878788 |
| MOCS22        | 3.25E-14 | 0.2926    | 0.118 | 0.065 | 7.84E-10 | 2.2 | MOCS2      | 1.815384615 |
| GPD1L         | 3.27E-14 | 0.1283008 | 0.033 | 0.01  | 7.89E-10 | 2.2 | GPD1L      | 3.3         |
| RNF101        | 4.05E-14 | 0.3711092 | 0.292 | 0.223 | 9.77E-10 | 2.2 | RNF10      | 1.30941704  |
| GMDS1         | 4.36E-14 | 0.4721289 | 0.504 | 0.457 | 1.05E-09 | 2.2 | GMDS       | 1.102844639 |
| TRA2B1        | 4.40E-14 | 0.4260872 | 0.278 | 0.211 | 1.06E-09 | 2.2 | TRA2B      | 1.317535545 |
| SNRPF4        | 4.40E-14 | 0.4364009 | 0.257 | 0.189 | 1.06E-09 | 2.2 | SNRPF      | 1.35978836  |
| STT3B1        | 4.48E-14 | 0.4034124 | 0.249 | 0.181 | 1.08E-09 | 2.2 | STT3B      | 1.375690608 |
| SORD1         | 5.55E-14 | 0.1937208 | 0.07  | 0.032 | 1.34E-09 | 2.2 | SORD       | 2.1875      |
| TFF11         | 5.82E-14 | 0.3975275 | 0.17  | 0.103 | 1.40E-09 | 2.2 | TFF1       | 1.650485437 |
| SLC25A39      | 7.19E-14 | 0.1606065 | 0.044 | 0.016 | 1.73E-09 | 2.2 | SLC25A39   | 2.75        |
| CPNE3         | 8.39E-14 | 0.3794629 | 0.251 | 0.183 | 2.02E-09 | 2.2 | CPNE3      | 1.371584699 |
| COX7B2        | 8.50E-14 | 0.3025013 | 0.652 | 0.633 | 2.05E-09 | 2.2 | COX7B      | 1.030015798 |
| ALAD          | 8.61E-14 | 0.123713  | 0.037 | 0.012 | 2.08E-09 | 2.2 | ALAD       | 3.083333333 |
| FGFR1OP       | 1.04E-13 | 0.2577489 | 0.102 | 0.054 | 2.51E-09 | 2.2 | FGFR1OP    | 1.888888889 |
| UBN21         | 1.13E-13 | 0.4223345 | 0.341 | 0.271 | 2.73E-09 | 2.2 | UBN2       | 1.258302583 |
| GSTO22        | 1.14E-13 | 0.3173319 | 0.151 | 0.093 | 2.75E-09 | 2.2 | GSTO2      | 1.623655914 |
| TTC6          | 1.16E-13 | 0.4594118 | 0.24  | 0.172 | 2.80E-09 | 2.2 | TTC6       | 1.395348837 |
| TMEM591       | 1.33E-13 | 0.3674204 | 0.497 | 0.452 | 3.21E-09 | 2.2 | TMEM59     | 1.099557522 |
| NOSTRIN       | 1.39E-13 | 0.2206206 | 0.072 | 0.033 | 3.36E-09 | 2.2 | NOSTRIN    | 2.181818182 |
| MAGED2        | 1.40E-13 | 0.1945187 | 0.062 | 0.026 | 3.37E-09 | 2.2 | MAGED2     | 2.384615385 |
| C2CD4A1       | 1.44E-13 | 0.1996564 | 0.092 | 0.046 | 3.48E-09 | 2.2 | C2CD4A     | 2           |
| NIPBL1        | 1.56E-13 | 0.5213287 | 0.553 | 0.549 | 3.76E-09 | 2.2 | NIPBL      | 1.007285974 |
| STIP11        | 1.63E-13 | 0.3221917 | 0.107 | 0.058 | 3.93E-09 | 2.2 | STIP1      | 1.844827586 |
| GNA151        | 1.70E-13 | 0.1997353 | 0.064 | 0.028 | 4.09E-09 | 2.2 | GNA15      | 2.285714286 |
| GADD45B1      | 1.76E-13 | 0.4226951 | 0.17  | 0.107 | 4.25E-09 | 2.2 | GADD45B    | 1.588785047 |

|               |          |           |       |       |          |     |           |             |
|---------------|----------|-----------|-------|-------|----------|-----|-----------|-------------|
| EIF2AK11      | 1.82E-13 | 0.5414819 | 0.171 | 0.111 | 4.38E-09 | 2.2 | EIF2AK1   | 1.540540541 |
| CDH15         | 1.92E-13 | 0.2761769 | 0.642 | 0.605 | 4.62E-09 | 2.2 | CDH1      | 1.061157025 |
| ZMAT11        | 2.38E-13 | 0.1299152 | 0.034 | 0.011 | 5.74E-09 | 2.2 | ZMAT1     | 3.090909091 |
| ANKRD171      | 2.44E-13 | 0.462728  | 0.532 | 0.509 | 5.88E-09 | 2.2 | ANKRD17   | 1.04518664  |
| LRRFIP23      | 2.60E-13 | 0.217698  | 0.769 | 0.763 | 6.26E-09 | 2.2 | LRRFIP2   | 1.007863696 |
| SOD1          | 2.97E-13 | 0.3925389 | 0.18  | 0.119 | 7.16E-09 | 2.2 | SOD1      | 1.512605042 |
| HELB2         | 3.14E-13 | 0.3925664 | 0.157 | 0.1   | 7.58E-09 | 2.2 | HELB      | 1.57        |
| AMIGO21       | 3.18E-13 | 0.1764683 | 0.055 | 0.022 | 7.67E-09 | 2.2 | AMIGO2    | 2.5         |
| NFKBIA2       | 3.51E-13 | 0.4097772 | 0.644 | 0.628 | 8.47E-09 | 2.2 | NFKBIA    | 1.025477707 |
| RBFOX23       | 3.86E-13 | 0.2498916 | 0.951 | 0.952 | 9.31E-09 | 2.2 | RBFOX2    | 0.99894958  |
| TFF31         | 3.91E-13 | 0.2541249 | 0.106 | 0.057 | 9.42E-09 | 2.2 | TFF3      | 1.859649123 |
| TPM13         | 4.58E-13 | 0.2722805 | 0.575 | 0.524 | 1.10E-08 | 2.2 | TPM1      | 1.097328244 |
| PKIB1         | 4.63E-13 | 0.2686605 | 0.145 | 0.088 | 1.12E-08 | 2.2 | PKIB      | 1.647727273 |
| PFDN12        | 4.84E-13 | 0.4162758 | 0.282 | 0.219 | 1.17E-08 | 2.2 | PFDN1     | 1.287671233 |
| PPME11        | 5.04E-13 | 0.3368094 | 0.133 | 0.079 | 1.22E-08 | 2.2 | PPME1     | 1.683544304 |
| BATF1         | 5.40E-13 | 0.3214889 | 0.124 | 0.072 | 1.30E-08 | 2.2 | BATF      | 1.722222222 |
| EGR11         | 5.43E-13 | 0.3400564 | 0.125 | 0.073 | 1.31E-08 | 2.2 | EGR1      | 1.712328767 |
| CD2AP3        | 5.52E-13 | 0.4005296 | 0.473 | 0.427 | 1.33E-08 | 2.2 | CD2AP     | 1.107728337 |
| PER1          | 5.95E-13 | 0.2473676 | 0.076 | 0.037 | 1.43E-08 | 2.2 | PER1      | 2.054054054 |
| EIF5AL11      | 6.00E-13 | 0.2531538 | 0.089 | 0.046 | 1.45E-08 | 2.2 | EIF5AL1   | 1.934782609 |
| SIDT1         | 6.30E-13 | 0.2597356 | 0.083 | 0.041 | 1.52E-08 | 2.2 | SIDT1     | 2.024390244 |
| ADAMTS15      | 6.53E-13 | 0.1479936 | 0.027 | 0.007 | 1.57E-08 | 2.2 | ADAMTS15  | 3.857142857 |
| PSD31         | 6.59E-13 | 0.4384744 | 0.412 | 0.344 | 1.59E-08 | 2.2 | PSD3      | 1.197674419 |
| ABCC12        | 7.28E-13 | 0.319907  | 0.16  | 0.101 | 1.76E-08 | 2.2 | ABCC1     | 1.584158416 |
| HNRNPU1       | 7.67E-13 | 0.3763333 | 0.179 | 0.12  | 1.85E-08 | 2.2 | HNRNPU    | 1.491666667 |
| MALRD11       | 7.68E-13 | 0.2622258 | 0.086 | 0.043 | 1.85E-08 | 2.2 | MALRD1    | 2           |
| GTF3C61       | 7.97E-13 | 0.2456634 | 0.106 | 0.058 | 1.92E-08 | 2.2 | GTF3C6    | 1.827586207 |
| RP11-295K2.31 | 8.66E-13 | 0.1450745 | 0.041 | 0.015 | 2.09E-08 | 2.2 | RP11-295K | 2.733333333 |
| ADD31         | 8.75E-13 | 0.3749086 | 0.26  | 0.193 | 2.11E-08 | 2.2 | ADD3      | 1.347150259 |
| ALDH3B21      | 9.19E-13 | 0.1076259 | 0.032 | 0.01  | 2.22E-08 | 2.2 | ALDH3B2   | 3.2         |
| TPT12         | 9.38E-13 | 0.1172713 | 0.867 | 0.851 | 2.26E-08 | 2.2 | TPT1      | 1.01880141  |
| NUDT24        | 1.03E-12 | 0.332837  | 0.181 | 0.122 | 2.49E-08 | 2.2 | NUDT2     | 1.483606557 |
| JUNB          | 1.04E-12 | 0.4601032 | 0.078 | 0.038 | 2.51E-08 | 2.2 | JUNB      | 2.052631579 |
| SPCS11        | 1.07E-12 | 0.3083796 | 0.139 | 0.084 | 2.58E-08 | 2.2 | SPCS1     | 1.654761905 |
| RP5-1101C3.11 | 1.15E-12 | 0.2972346 | 0.104 | 0.057 | 2.78E-08 | 2.2 | RP5-1101C | 1.824561404 |
| ACADSB1       | 1.22E-12 | 0.292786  | 0.275 | 0.2   | 2.94E-08 | 2.2 | ACADSB    | 1.375       |
| TGM31         | 1.37E-12 | 0.2543443 | 0.054 | 0.022 | 3.30E-08 | 2.2 | TGM3      | 2.454545455 |
| TBC1D30       | 1.50E-12 | 0.2397561 | 0.076 | 0.037 | 3.61E-08 | 2.2 | TBC1D30   | 2.054054054 |
| HMGCR         | 1.55E-12 | 0.3060534 | 0.143 | 0.088 | 3.75E-08 | 2.2 | HMGCR     | 1.625       |
| MPP71         | 1.58E-12 | 0.3606669 | 0.174 | 0.114 | 3.80E-08 | 2.2 | MPP7      | 1.526315789 |
| TSPYL5        | 1.71E-12 | 0.1223536 | 0.035 | 0.012 | 4.12E-08 | 2.2 | TSPYL5    | 2.916666667 |
| SMARCA21      | 1.78E-12 | 0.3911264 | 0.365 | 0.308 | 4.28E-08 | 2.2 | SMARCA2   | 1.185064935 |
| RPL375        | 1.93E-12 | 0.1806671 | 0.947 | 0.946 | 4.65E-08 | 2.2 | RPL37     | 1.001057082 |
| OSBP1         | 2.01E-12 | 0.335586  | 0.214 | 0.15  | 4.84E-08 | 2.2 | OSBP      | 1.426666667 |
| GTF3A1        | 2.02E-12 | 0.2440015 | 0.102 | 0.056 | 4.88E-08 | 2.2 | GTF3A     | 1.821428571 |
| NAMPT         | 2.15E-12 | 0.2541942 | 0.693 | 0.647 | 5.17E-08 | 2.2 | NAMPT     | 1.071097372 |
| DEPDC1B1      | 2.24E-12 | 0.1316394 | 0.034 | 0.011 | 5.40E-08 | 2.2 | DEPDC1B   | 3.090909091 |
| PLAT1         | 2.35E-12 | 0.2916817 | 0.14  | 0.085 | 5.66E-08 | 2.2 | PLAT      | 1.647058824 |
| OCIAD12       | 2.59E-12 | 0.4019173 | 0.313 | 0.255 | 6.24E-08 | 2.2 | OCIAD1    | 1.22745098  |
| BRDT1         | 2.69E-12 | 0.1993931 | 0.07  | 0.033 | 6.49E-08 | 2.2 | BRDT      | 2.121212121 |
| IGF1R1        | 3.05E-12 | 0.4462708 | 0.522 | 0.504 | 7.36E-08 | 2.2 | IGF1R     | 1.035714286 |
| GJC31         | 3.06E-12 | 0.2925347 | 0.147 | 0.091 | 7.38E-08 | 2.2 | GJC3      | 1.615384615 |



|               |          |           |       |       |          |     |            |             |
|---------------|----------|-----------|-------|-------|----------|-----|------------|-------------|
| RPS114        | 3.07E-12 | 0.1209703 | 0.818 | 0.768 | 7.40E-08 | 2.2 | RPS11      | 1.065104167 |
| RP1-78O14.11  | 3.26E-12 | 0.3812148 | 0.275 | 0.201 | 7.85E-08 | 2.2 | RP1-78O14  | 1.368159204 |
| GSTZ1         | 3.26E-12 | 0.1201319 | 0.03  | 0.01  | 7.86E-08 | 2.2 | GSTZ1      | 3           |
| IPO73         | 3.33E-12 | 0.4612025 | 0.311 | 0.25  | 8.03E-08 | 2.2 | IPO7       | 1.244       |
| RGL21         | 3.48E-12 | 0.2462473 | 0.081 | 0.041 | 8.40E-08 | 2.2 | RGL2       | 1.975609756 |
| TMEM991       | 3.53E-12 | 0.2724108 | 0.123 | 0.073 | 8.52E-08 | 2.2 | TMEM99     | 1.684931507 |
| BEX4          | 3.54E-12 | 0.1713622 | 0.052 | 0.022 | 8.54E-08 | 2.2 | BEX4       | 2.363636364 |
| IGFBP21       | 3.66E-12 | 0.2462318 | 0.09  | 0.048 | 8.82E-08 | 2.2 | IGFBP2     | 1.875       |
| BCL61         | 3.74E-12 | 0.5392625 | 0.401 | 0.356 | 9.01E-08 | 2.2 | BCL6       | 1.126404494 |
| TMEM254-AS11  | 3.96E-12 | 0.1420388 | 0.053 | 0.022 | 9.56E-08 | 2.2 | TMEM254-   | 2.409090909 |
| TCEANC2       | 4.29E-12 | 0.3590855 | 0.306 | 0.236 | 1.03E-07 | 2.2 | TCEANC2    | 1.296610169 |
| COPRS         | 4.34E-12 | 0.1240793 | 0.033 | 0.011 | 1.05E-07 | 2.2 | COPRS      | 3           |
| RPL10A4       | 4.45E-12 | 0.1691464 | 0.763 | 0.715 | 1.07E-07 | 2.2 | RPL10A     | 1.067132867 |
| PSORS1C11     | 5.14E-12 | 0.2553571 | 0.091 | 0.049 | 1.24E-07 | 2.2 | PSORS1C1   | 1.857142857 |
| COX17         | 5.32E-12 | 0.255289  | 0.108 | 0.061 | 1.28E-07 | 2.2 | COX17      | 1.770491803 |
| MLEC1         | 6.17E-12 | 0.2637073 | 0.13  | 0.079 | 1.49E-07 | 2.2 | MLEC       | 1.64556962  |
| NRXN11        | 6.68E-12 | 0.2636668 | 0.08  | 0.04  | 1.61E-07 | 2.2 | NRXN1      | 2           |
| HIBCH2        | 6.81E-12 | 0.4116054 | 0.164 | 0.109 | 1.64E-07 | 2.2 | HIBCH      | 1.504587156 |
| ITGAV1        | 6.82E-12 | 0.2723456 | 0.473 | 0.397 | 1.64E-07 | 2.2 | ITGAV      | 1.191435768 |
| RASGEF1B2     | 7.08E-12 | 0.238999  | 0.871 | 0.893 | 1.71E-07 | 2.2 | RASGEF1B   | 0.975363942 |
| AF127936.91   | 7.21E-12 | 0.3559857 | 0.206 | 0.143 | 1.74E-07 | 2.2 | AF127936.! | 1.440559441 |
| LRRIQ1        | 7.27E-12 | 0.1301288 | 0.036 | 0.013 | 1.75E-07 | 2.2 | LRRIQ1     | 2.769230769 |
| TMEM14A1      | 7.67E-12 | 0.2002978 | 0.103 | 0.057 | 1.85E-07 | 2.2 | TMEM14A    | 1.807017544 |
| ATRAID        | 8.25E-12 | 0.2326728 | 0.089 | 0.047 | 1.99E-07 | 2.2 | ATRAID     | 1.893617021 |
| PROM21        | 8.31E-12 | 0.2310882 | 0.09  | 0.048 | 2.00E-07 | 2.2 | PROM2      | 1.875       |
| TMEM241       | 8.99E-12 | 0.2814371 | 0.137 | 0.086 | 2.17E-07 | 2.2 | TMEM241    | 1.593023256 |
| EIF3A1        | 9.51E-12 | 0.3703896 | 0.383 | 0.326 | 2.29E-07 | 2.2 | EIF3A      | 1.174846626 |
| IKZF5         | 9.71E-12 | 0.20153   | 0.083 | 0.043 | 2.34E-07 | 2.2 | IKZF5      | 1.930232558 |
| IMMP1L1       | 1.16E-11 | 0.3010666 | 0.197 | 0.136 | 2.80E-07 | 2.2 | IMMP1L     | 1.448529412 |
| RP11-108M9.41 | 1.21E-11 | 0.1690663 | 0.059 | 0.027 | 2.93E-07 | 2.2 | RP11-108M  | 2.185185185 |
| DYNC2LI11     | 1.33E-11 | 0.318264  | 0.138 | 0.087 | 3.21E-07 | 2.2 | DYNC2LI1   | 1.586206897 |
| BAG11         | 1.46E-11 | 0.2979671 | 0.15  | 0.097 | 3.53E-07 | 2.2 | BAG1       | 1.546391753 |
| PLA2G2A1      | 1.50E-11 | 0.1022272 | 0.03  | 0.01  | 3.61E-07 | 2.2 | PLA2G2A    | 3           |
| SPDEF         | 1.52E-11 | 0.1013441 | 0.025 | 0.007 | 3.66E-07 | 2.2 | SPDEF      | 3.571428571 |
| CSRNP1        | 1.56E-11 | 0.2562692 | 0.084 | 0.044 | 3.75E-07 | 2.2 | CSRNP1     | 1.909090909 |
| SRSF34        | 1.60E-11 | 0.2037744 | 0.495 | 0.429 | 3.87E-07 | 2.2 | SRSF3      | 1.153846154 |
| SRP14-AS1     | 1.62E-11 | 0.1044328 | 0.03  | 0.01  | 3.91E-07 | 2.2 | SRP14-AS1  | 3           |
| LYRM51        | 1.82E-11 | 0.3295394 | 0.161 | 0.107 | 4.39E-07 | 2.2 | LYRM5      | 1.504672897 |
| OTUD7B1       | 1.90E-11 | 0.367418  | 0.354 | 0.292 | 4.58E-07 | 2.2 | OTUD7B     | 1.212328767 |
| RAB3D         | 1.97E-11 | 0.2103889 | 0.065 | 0.032 | 4.76E-07 | 2.2 | RAB3D      | 2.03125     |
| QKI2          | 1.98E-11 | 0.4040846 | 0.551 | 0.541 | 4.78E-07 | 2.2 | QKI        | 1.018484288 |
| TRIO3         | 2.05E-11 | 0.2679617 | 0.822 | 0.809 | 4.95E-07 | 2.2 | TRIO       | 1.016069221 |
| EWSR11        | 2.32E-11 | 0.3468982 | 0.176 | 0.121 | 5.59E-07 | 2.2 | EWSR1      | 1.454545455 |
| HNRNPD1       | 2.42E-11 | 0.3628778 | 0.336 | 0.281 | 5.83E-07 | 2.2 | HNRNPD     | 1.195729537 |
| ABCA121       | 2.71E-11 | 0.1862139 | 0.051 | 0.022 | 6.53E-07 | 2.2 | ABCA12     | 2.318181818 |
| REL1          | 2.96E-11 | 0.3628921 | 0.356 | 0.298 | 7.14E-07 | 2.2 | REL        | 1.194630872 |
| CUL31         | 3.21E-11 | 0.4067358 | 0.443 | 0.402 | 7.75E-07 | 2.2 | CUL3       | 1.10199005  |
| SURF11        | 3.37E-11 | 0.1004311 | 0.034 | 0.012 | 8.13E-07 | 2.2 | SURF1      | 2.833333333 |
| RYBP1         | 3.42E-11 | 0.3707204 | 0.239 | 0.178 | 8.25E-07 | 2.2 | RYBP       | 1.342696629 |
| CCDC63        | 3.64E-11 | 0.4312385 | 0.367 | 0.316 | 8.77E-07 | 2.2 | CCDC6      | 1.161392405 |
| C3orf521      | 3.76E-11 | 0.311243  | 0.222 | 0.159 | 9.08E-07 | 2.2 | C3orf52    | 1.396226415 |
| H2AFV1        | 3.95E-11 | 0.2831124 | 0.139 | 0.088 | 9.51E-07 | 2.2 | H2AFV      | 1.579545455 |

|               |          |           |       |       |          |     |           |             |
|---------------|----------|-----------|-------|-------|----------|-----|-----------|-------------|
| RAB30-AS12    | 4.11E-11 | 0.260458  | 0.122 | 0.075 | 9.91E-07 | 2.2 | RAB30-AS1 | 1.626666667 |
| PPT1          | 4.40E-11 | 0.1889019 | 0.074 | 0.038 | 1.06E-06 | 2.2 | PPT1      | 1.947368421 |
| RP11-35G9.5   | 4.50E-11 | 0.3507215 | 0.147 | 0.095 | 1.08E-06 | 2.2 | RP11-35G9 | 1.547368421 |
| BTG2          | 4.51E-11 | 0.3730353 | 0.103 | 0.06  | 1.09E-06 | 2.2 | BTG2      | 1.716666667 |
| RPS6KA31      | 4.69E-11 | 0.4596019 | 0.489 | 0.464 | 1.13E-06 | 2.2 | RPS6KA3   | 1.05387931  |
| TAF9B1        | 4.81E-11 | 0.1169204 | 0.038 | 0.015 | 1.16E-06 | 2.2 | TAF9B     | 2.533333333 |
| TMEM126A3     | 4.95E-11 | 0.2914169 | 0.146 | 0.095 | 1.19E-06 | 2.2 | TMEM126A  | 1.536842105 |
| DIXDC11       | 5.77E-11 | 0.5579152 | 0.169 | 0.114 | 1.39E-06 | 2.2 | DIXDC1    | 1.48245614  |
| STYK11        | 5.83E-11 | 0.268952  | 0.11  | 0.065 | 1.41E-06 | 2.2 | STYK1     | 1.692307692 |
| ENPP51        | 6.41E-11 | 0.1931191 | 0.066 | 0.033 | 1.55E-06 | 2.2 | ENPP5     | 2           |
| DNAJC27-AS1   | 6.41E-11 | 0.1787379 | 0.054 | 0.024 | 1.55E-06 | 2.2 | DNAJC27-A | 2.25        |
| LSM53         | 6.51E-11 | 0.3959626 | 0.39  | 0.345 | 1.57E-06 | 2.2 | LSM5      | 1.130434783 |
| COPZ12        | 6.70E-11 | 0.3489345 | 0.371 | 0.32  | 1.62E-06 | 2.2 | COPZ1     | 1.159375    |
| KIAA0825      | 6.98E-11 | 0.3106637 | 0.143 | 0.093 | 1.68E-06 | 2.2 | KIAA0825  | 1.537634409 |
| PPP2CB2       | 7.03E-11 | 0.3927728 | 0.387 | 0.338 | 1.69E-06 | 2.2 | PPP2CB    | 1.144970414 |
| LAMTOR2       | 7.29E-11 | 0.2119657 | 0.081 | 0.043 | 1.76E-06 | 2.2 | LAMTOR2   | 1.88372093  |
| DHX151        | 7.76E-11 | 0.3397477 | 0.316 | 0.259 | 1.87E-06 | 2.2 | DHX15     | 1.22007722  |
| CHN1          | 8.00E-11 | 0.2124884 | 0.104 | 0.06  | 1.93E-06 | 2.2 | CHN1      | 1.733333333 |
| RP11-481C4.11 | 9.06E-11 | 0.2391615 | 0.104 | 0.061 | 2.18E-06 | 2.2 | RP11-481C | 1.704918033 |
| HSPD14        | 9.67E-11 | 0.496168  | 0.302 | 0.251 | 2.33E-06 | 2.2 | HSPD1     | 1.203187251 |
| RALY-AS1      | 1.01E-10 | 0.1053473 | 0.029 | 0.01  | 2.44E-06 | 2.2 | RALY-AS1  | 2.9         |
| APEX12        | 1.04E-10 | 0.3270188 | 0.251 | 0.192 | 2.52E-06 | 2.2 | APEX1     | 1.307291667 |
| CTNND11       | 1.05E-10 | 0.37467   | 0.435 | 0.395 | 2.53E-06 | 2.2 | CTNND1    | 1.101265823 |
| RPL37A5       | 1.08E-10 | 0.1921767 | 0.975 | 0.975 | 2.60E-06 | 2.2 | RPL37A    | 1           |
| PTPN20        | 1.08E-10 | 0.107437  | 0.03  | 0.01  | 2.60E-06 | 2.2 | PTPN20    | 3           |
| ARHGEF261     | 1.18E-10 | 0.3453336 | 0.154 | 0.102 | 2.84E-06 | 2.2 | ARHGEF26  | 1.509803922 |
| TNS1          | 1.18E-10 | 0.2057773 | 0.081 | 0.043 | 2.85E-06 | 2.2 | TNS1      | 1.88372093  |
| S100A16       | 1.23E-10 | 0.2876117 | 0.212 | 0.153 | 2.96E-06 | 2.2 | S100A16   | 1.385620915 |
| USP153        | 1.38E-10 | 0.4476389 | 0.375 | 0.33  | 3.32E-06 | 2.2 | USP15     | 1.136363636 |
| NPIP51        | 1.38E-10 | 0.2801117 | 0.136 | 0.087 | 3.32E-06 | 2.2 | NPIP5     | 1.563218391 |
| LRRC591       | 1.46E-10 | 0.214024  | 0.112 | 0.067 | 3.53E-06 | 2.2 | LRRC59    | 1.671641791 |
| PIN42         | 1.64E-10 | 0.4283111 | 0.317 | 0.265 | 3.96E-06 | 2.2 | PIN4      | 1.196226415 |
| IFT222        | 1.70E-10 | 0.1912684 | 0.082 | 0.044 | 4.10E-06 | 2.2 | IFT22     | 1.863636364 |
| ISOC1         | 1.71E-10 | 0.176208  | 0.057 | 0.027 | 4.12E-06 | 2.2 | ISOC1     | 2.111111111 |
| SUCLG1        | 1.74E-10 | 0.242894  | 0.115 | 0.07  | 4.18E-06 | 2.2 | SUCLG1    | 1.642857143 |
| MED41         | 1.83E-10 | 0.3247985 | 0.21  | 0.154 | 4.41E-06 | 2.2 | MED4      | 1.363636364 |
| CTD-2369P2.51 | 2.17E-10 | 0.1771185 | 0.057 | 0.027 | 5.22E-06 | 2.2 | CTD-2369P | 2.111111111 |
| VWA8          | 2.19E-10 | 0.398731  | 0.149 | 0.099 | 5.28E-06 | 2.2 | VWA8      | 1.505050505 |
| GNPNAT1       | 2.19E-10 | 0.1489838 | 0.057 | 0.027 | 5.29E-06 | 2.2 | GNPNAT1   | 2.111111111 |
| CTC1          | 2.29E-10 | 0.4597735 | 0.102 | 0.06  | 5.53E-06 | 2.2 | CTC1      | 1.7         |
| SUMO13        | 2.36E-10 | 0.2806155 | 0.528 | 0.496 | 5.70E-06 | 2.2 | SUMO1     | 1.064516129 |
| RANBP91       | 2.38E-10 | 0.3756221 | 0.35  | 0.297 | 5.74E-06 | 2.2 | RANBP9    | 1.178451178 |
| MTMR41        | 2.38E-10 | 0.2152866 | 0.085 | 0.047 | 5.74E-06 | 2.2 | MTMR4     | 1.808510638 |
| ARHGAP40      | 2.38E-10 | 0.1321395 | 0.038 | 0.015 | 5.75E-06 | 2.2 | ARHGAP40  | 2.533333333 |
| ARG21         | 2.41E-10 | 0.2948567 | 0.061 | 0.125 | 5.82E-06 | 2.2 | ARG2      | 0.488       |
| TMEM179B      | 2.50E-10 | 0.2000058 | 0.065 | 0.033 | 6.03E-06 | 2.2 | TMEM179B  | 1.96969697  |
| DNMBP-AS1     | 2.53E-10 | 0.1017896 | 0.025 | 0.008 | 6.10E-06 | 2.2 | DNMBP-AS  | 3.125       |
| FLNB2         | 2.56E-10 | 0.2958305 | 0.5   | 0.456 | 6.18E-06 | 2.2 | FLNB      | 1.096491228 |
| PGRMC11       | 2.63E-10 | 0.2882656 | 0.13  | 0.083 | 6.34E-06 | 2.2 | PGRMC1    | 1.56626506  |
| HMG1          | 2.66E-10 | 0.3849744 | 0.231 | 0.178 | 6.42E-06 | 2.2 | HMG1      | 1.297752809 |
| COL4A6        | 2.66E-10 | 0.2532103 | 0.102 | 0.06  | 6.42E-06 | 2.2 | COL4A6    | 1.7         |
| CHMP5         | 2.70E-10 | 0.313219  | 0.475 | 0.436 | 6.52E-06 | 2.2 | CHMP5     | 1.089449541 |

|               |          |           |       |       |          |     |            |             |
|---------------|----------|-----------|-------|-------|----------|-----|------------|-------------|
| C1orf123      | 2.85E-10 | 0.1664135 | 0.052 | 0.024 | 6.87E-06 | 2.2 | C1orf123   | 2.166666667 |
| EFS           | 2.85E-10 | 0.1356516 | 0.038 | 0.015 | 6.88E-06 | 2.2 | EFS        | 2.533333333 |
| DUSP161       | 3.03E-10 | 0.3284037 | 0.468 | 0.42  | 7.30E-06 | 2.2 | DUSP16     | 1.114285714 |
| RABEP1        | 3.04E-10 | 0.3911214 | 0.212 | 0.158 | 7.32E-06 | 2.2 | RABEP1     | 1.341772152 |
| MT-ND52       | 3.05E-10 | 0.3162451 | 0.832 | 0.854 | 7.35E-06 | 2.2 | MT-ND5     | 0.974238876 |
| EIF4E3        | 3.25E-10 | 0.2980119 | 0.429 | 0.38  | 7.83E-06 | 2.2 | EIF4E      | 1.128947368 |
| ASH1L1        | 3.26E-10 | 0.3725366 | 0.559 | 0.552 | 7.85E-06 | 2.2 | ASH1L      | 1.012681159 |
| KCNMA11       | 3.33E-10 | 0.1353384 | 0.209 | 0.146 | 8.02E-06 | 2.2 | KCNMA1     | 1.431506849 |
| SIAH21        | 3.42E-10 | 0.2491465 | 0.121 | 0.075 | 8.24E-06 | 2.2 | SIAH2      | 1.613333333 |
| AFTPH2        | 3.48E-10 | 0.3866891 | 0.36  | 0.313 | 8.38E-06 | 2.2 | AFTPH      | 1.150159744 |
| NUCB21        | 3.56E-10 | 0.3098736 | 0.18  | 0.127 | 8.59E-06 | 2.2 | NUCB2      | 1.417322835 |
| ARFGEF21      | 3.79E-10 | 0.4367165 | 0.408 | 0.372 | 9.13E-06 | 2.2 | ARFGEF2    | 1.096774194 |
| HSP90AA13     | 3.83E-10 | 0.2154337 | 0.882 | 0.853 | 9.25E-06 | 2.2 | HSP90AA1   | 1.033997655 |
| PPIC          | 4.06E-10 | 0.1905407 | 0.074 | 0.039 | 9.80E-06 | 2.2 | PPIC       | 1.897435897 |
| COX161        | 4.20E-10 | 0.1223452 | 0.034 | 0.013 | 1.01E-05 | 2.2 | COX16      | 2.615384615 |
| DUT1          | 4.67E-10 | 0.1765438 | 0.062 | 0.031 | 1.13E-05 | 2.2 | DUT        | 2           |
| CREB3L1       | 4.85E-10 | 0.171936  | 0.053 | 0.025 | 1.17E-05 | 2.2 | CREB3L1    | 2.12        |
| RANBP101      | 4.95E-10 | 0.2987935 | 0.13  | 0.083 | 1.19E-05 | 2.2 | RANBP10    | 1.56626506  |
| NDE1          | 5.25E-10 | 0.2472229 | 0.083 | 0.046 | 1.27E-05 | 2.2 | NDE1       | 1.804347826 |
| SSBP21        | 5.71E-10 | 0.3210003 | 0.486 | 0.435 | 1.38E-05 | 2.2 | SSBP2      | 1.117241379 |
| COA3          | 5.90E-10 | 0.1473929 | 0.051 | 0.023 | 1.42E-05 | 2.2 | COA3       | 2.217391304 |
| DHX9          | 5.93E-10 | 0.3149002 | 0.251 | 0.195 | 1.43E-05 | 2.2 | DHX9       | 1.287179487 |
| RPA3          | 5.98E-10 | 0.3206652 | 0.189 | 0.138 | 1.44E-05 | 2.2 | RPA3       | 1.369565217 |
| RETSAT        | 6.51E-10 | 0.1601678 | 0.054 | 0.025 | 1.57E-05 | 2.2 | RETSAT     | 2.16        |
| SLC10A6       | 6.85E-10 | 0.2153479 | 0.052 | 0.024 | 1.65E-05 | 2.2 | SLC10A6    | 2.166666667 |
| TMEM126B2     | 8.27E-10 | 0.293147  | 0.154 | 0.105 | 1.99E-05 | 2.2 | TMEM126B   | 1.466666667 |
| CANX1         | 8.36E-10 | 0.351174  | 0.38  | 0.338 | 2.02E-05 | 2.2 | CANX       | 1.124260355 |
| EIF4G21       | 8.47E-10 | 0.2988054 | 0.433 | 0.391 | 2.04E-05 | 2.2 | EIF4G2     | 1.10741688  |
| EIF3H4        | 8.77E-10 | 0.234105  | 0.642 | 0.625 | 2.12E-05 | 2.2 | EIF3H      | 1.0272      |
| LAMP11        | 8.86E-10 | 0.297456  | 0.143 | 0.095 | 2.14E-05 | 2.2 | LAMP1      | 1.505263158 |
| VIPR1         | 8.89E-10 | 0.1605692 | 0.049 | 0.022 | 2.14E-05 | 2.2 | VIPR1      | 2.227272727 |
| PMP221        | 8.90E-10 | 0.1476495 | 0.048 | 0.022 | 2.15E-05 | 2.2 | PMP22      | 2.181818182 |
| PLEKHF2       | 9.29E-10 | 0.3334245 | 0.148 | 0.1   | 2.24E-05 | 2.2 | PLEKHF2    | 1.48        |
| IMPACT1       | 9.30E-10 | 0.1579389 | 0.051 | 0.024 | 2.24E-05 | 2.2 | IMPACT     | 2.125       |
| RP11-49I11.11 | 9.38E-10 | 0.1929796 | 0.072 | 0.038 | 2.26E-05 | 2.2 | RP11-49I11 | 1.894736842 |
| IRF2BP21      | 9.39E-10 | 0.3796159 | 0.181 | 0.13  | 2.27E-05 | 2.2 | IRF2BP2    | 1.392307692 |
| BANK11        | 9.93E-10 | 0.1259768 | 0.057 | 0.027 | 2.39E-05 | 2.2 | BANK1      | 2.111111111 |
| GLOD4         | 1.10E-09 | 0.2988097 | 0.148 | 0.101 | 2.65E-05 | 2.2 | GLOD4      | 1.465346535 |
| MYEOV2        | 1.12E-09 | 0.2183494 | 0.088 | 0.05  | 2.70E-05 | 2.2 | MYEOV2     | 1.76        |
| YWHAB         | 1.24E-09 | 0.3628062 | 0.359 | 0.314 | 2.98E-05 | 2.2 | YWHAB      | 1.143312102 |
| GANAB         | 1.26E-09 | 0.295937  | 0.161 | 0.113 | 3.03E-05 | 2.2 | GANAB      | 1.424778761 |
| ATP7A         | 1.27E-09 | 0.2060322 | 0.082 | 0.046 | 3.07E-05 | 2.2 | ATP7A      | 1.782608696 |
| EIF4A31       | 1.30E-09 | 0.4313676 | 0.142 | 0.096 | 3.13E-05 | 2.2 | EIF4A3     | 1.479166667 |
| RP11-420K8.11 | 1.38E-09 | 0.1189224 | 0.042 | 0.018 | 3.33E-05 | 2.2 | RP11-420K  | 2.333333333 |
| RP11-166B2.81 | 1.43E-09 | 0.2326994 | 0.102 | 0.061 | 3.45E-05 | 2.2 | RP11-166B  | 1.672131148 |
| NFIA          | 1.44E-09 | 0.3396768 | 0.245 | 0.188 | 3.47E-05 | 2.2 | NFIA       | 1.303191489 |
| KLHDC101      | 1.48E-09 | 0.3324624 | 0.186 | 0.135 | 3.58E-05 | 2.2 | KLHDC10    | 1.377777778 |
| CCNL11        | 1.49E-09 | 0.3468583 | 0.443 | 0.411 | 3.60E-05 | 2.2 | CCNL1      | 1.077858881 |
| NOC3L         | 1.50E-09 | 0.1535194 | 0.051 | 0.024 | 3.62E-05 | 2.2 | NOC3L      | 2.125       |
| LAMTOR1       | 1.54E-09 | 0.2048858 | 0.072 | 0.039 | 3.72E-05 | 2.2 | LAMTOR1    | 1.846153846 |
| LRTOMT1       | 1.61E-09 | 0.180863  | 0.05  | 0.023 | 3.88E-05 | 2.2 | LRTOMT     | 2.173913043 |
| AMZ21         | 1.73E-09 | 0.1557531 | 0.059 | 0.03  | 4.18E-05 | 2.2 | AMZ2       | 1.966666667 |

|                |          |           |       |       |             |     |           |             |
|----------------|----------|-----------|-------|-------|-------------|-----|-----------|-------------|
| PTGES31        | 1.80E-09 | 0.4264263 | 0.289 | 0.242 | 4.35E-05    | 2.2 | PTGES3    | 1.194214876 |
| LINC001601     | 1.95E-09 | 0.1290034 | 0.036 | 0.014 | 4.71E-05    | 2.2 | LINC00160 | 2.571428571 |
| OLFM21         | 2.09E-09 | 0.2396281 | 0.058 | 0.029 | 5.05E-05    | 2.2 | OLFM2     | 2           |
| PYURF1         | 2.52E-09 | 0.193278  | 0.076 | 0.042 | 6.08E-05    | 2.2 | PYURF     | 1.80952381  |
| NEU31          | 2.53E-09 | 0.1606827 | 0.052 | 0.025 | 6.10E-05    | 2.2 | NEU3      | 2.08        |
| CDYL2          | 2.54E-09 | 0.1882154 | 0.065 | 0.034 | 6.13E-05    | 2.2 | CDYL2     | 1.911764706 |
| DNAJC24        | 2.62E-09 | 0.2374122 | 0.077 | 0.043 | 6.32E-05    | 2.2 | DNAJC24   | 1.790697674 |
| RP11-977G19.11 | 2.65E-09 | 0.110474  | 0.034 | 0.013 | 6.39E-05    | 2.2 | RP11-977G | 2.615384615 |
| ABCC111        | 2.86E-09 | 0.1672537 | 0.034 | 0.014 | 6.90E-05    | 2.2 | ABCC11    | 2.428571429 |
| CLSTN21        | 3.05E-09 | 0.1917844 | 0.112 | 0.069 | 7.36E-05    | 2.2 | CLSTN2    | 1.623188406 |
| AP1M2          | 3.15E-09 | 0.2389243 | 0.12  | 0.077 | 7.60E-05    | 2.2 | AP1M2     | 1.558441558 |
| PCYOX1         | 3.16E-09 | 0.2699198 | 0.083 | 0.047 | 7.61E-05    | 2.2 | PCYOX1    | 1.765957447 |
| KLHL42         | 3.36E-09 | 0.2823264 | 0.112 | 0.071 | 8.11E-05    | 2.2 | KLHL42    | 1.577464789 |
| IBTK1          | 3.43E-09 | 0.4261175 | 0.27  | 0.22  | 8.26E-05    | 2.2 | IBTK      | 1.227272727 |
| ADAM281        | 3.50E-09 | 0.1122411 | 0.043 | 0.019 | 8.44E-05    | 2.2 | ADAM28    | 2.263157895 |
| NUCKS11        | 3.62E-09 | 0.3338087 | 0.341 | 0.296 | 8.74E-05    | 2.2 | NUCKS1    | 1.152027027 |
| RPH3AL         | 3.75E-09 | 0.1759065 | 0.043 | 0.019 | 9.05E-05    | 2.2 | RPH3AL    | 2.263157895 |
| CGNL11         | 3.79E-09 | 0.3715581 | 0.241 | 0.189 | 9.15E-05    | 2.2 | CGNL1     | 1.275132275 |
| FAM155A        | 4.06E-09 | 0.2380803 | 0.096 | 0.057 | 9.78E-05    | 2.2 | FAM155A   | 1.684210526 |
| ACSS3          | 4.22E-09 | 0.1475979 | 0.044 | 0.02  | 0.000101816 | 2.2 | ACSS3     | 2.2         |
| ATP5F13        | 4.32E-09 | 0.3067229 | 0.412 | 0.372 | 0.000104097 | 2.2 | ATP5F1    | 1.107526882 |
| CCPG1          | 4.38E-09 | 0.2739656 | 0.141 | 0.096 | 0.000105719 | 2.2 | CCPG1     | 1.46875     |
| TJP11          | 4.43E-09 | 0.4206913 | 0.516 | 0.509 | 0.000106727 | 2.2 | TJP1      | 1.013752456 |
| PRPF40A        | 5.10E-09 | 0.3467048 | 0.222 | 0.172 | 0.000123044 | 2.2 | PRPF40A   | 1.290697674 |
| NGFRAP12       | 5.13E-09 | 0.1873914 | 0.076 | 0.042 | 0.000123742 | 2.2 | NGFRAP1   | 1.80952381  |
| SNRPE4         | 5.23E-09 | 0.3266077 | 0.538 | 0.521 | 0.000125999 | 2.2 | SNRPE     | 1.032629559 |
| AP1S31         | 5.24E-09 | 0.2814347 | 0.171 | 0.121 | 0.000126365 | 2.2 | AP1S3     | 1.41322314  |
| FAM188A1       | 5.34E-09 | 0.2936618 | 0.145 | 0.098 | 0.000128809 | 2.2 | FAM188A   | 1.479591837 |
| BAZ1A1         | 5.62E-09 | 0.5500082 | 0.408 | 0.385 | 0.000135578 | 2.2 | BAZ1A     | 1.05974026  |
| TP53I3         | 7.02E-09 | 0.1250574 | 0.034 | 0.014 | 0.000169209 | 2.2 | TP53I3    | 2.428571429 |
| USP9X1         | 7.43E-09 | 0.3990319 | 0.432 | 0.406 | 0.000179231 | 2.2 | USP9X     | 1.064039409 |
| ENTPD7         | 7.95E-09 | 0.1094016 | 0.031 | 0.012 | 0.000191716 | 2.2 | ENTPD7    | 2.583333333 |
| CYB5R1         | 8.08E-09 | 0.1733839 | 0.059 | 0.031 | 0.00019487  | 2.2 | CYB5R1    | 1.903225806 |
| IER51          | 8.55E-09 | 0.3080391 | 0.158 | 0.111 | 0.00020621  | 2.2 | IER5      | 1.423423423 |
| SF3B63         | 9.07E-09 | 0.2591587 | 0.607 | 0.609 | 0.000218662 | 2.2 | SF3B6     | 0.996715928 |
| AHCY           | 9.22E-09 | 0.2533818 | 0.094 | 0.058 | 0.000222205 | 2.2 | AHCY      | 1.620689655 |
| POLR2G1        | 9.86E-09 | 0.3588489 | 0.219 | 0.172 | 0.000237694 | 2.2 | POLR2G    | 1.273255814 |
| PSMG3          | 9.92E-09 | 0.2390778 | 0.04  | 0.018 | 0.00023916  | 2.2 | PSMG3     | 2.222222222 |
| THSD4-AS12     | 1.00E-08 | 0.3258865 | 0.485 | 0.457 | 0.000241418 | 2.2 | THSD4-AS1 | 1.061269147 |
| PXYLP1         | 1.02E-08 | 0.1682983 | 0.057 | 0.029 | 0.000247098 | 2.2 | PXYLP1    | 1.965517241 |
| TIMMDC11       | 1.06E-08 | 0.2093263 | 0.09  | 0.054 | 0.000254504 | 2.2 | TIMMDC1   | 1.666666667 |
| TCEAL1         | 1.22E-08 | 0.1705163 | 0.051 | 0.025 | 0.000294882 | 2.2 | TCEAL1    | 2.04        |
| KIZ-AS14       | 1.24E-08 | 0.1418452 | 0.841 | 0.844 | 0.000298415 | 2.2 | KIZ-AS1   | 0.996445498 |
| TMEM25         | 1.25E-08 | 0.1003259 | 0.033 | 0.013 | 0.000301597 | 2.2 | TMEM25    | 2.538461538 |
| PDCL3          | 1.27E-08 | 0.1659954 | 0.061 | 0.032 | 0.000306236 | 2.2 | PDCL3     | 1.90625     |
| HEBP1          | 1.34E-08 | 0.2405751 | 0.103 | 0.065 | 0.000322075 | 2.2 | HEBP1     | 1.584615385 |
| TSPAN6         | 1.58E-08 | 0.3351197 | 0.223 | 0.176 | 0.000382063 | 2.2 | TSPAN6    | 1.267045455 |
| ETFA           | 1.71E-08 | 0.296541  | 0.176 | 0.129 | 0.000413038 | 2.2 | ETFA      | 1.364341085 |
| STX8           | 1.73E-08 | 0.3494168 | 0.277 | 0.23  | 0.000418353 | 2.2 | STX8      | 1.204347826 |
| METAP1D1       | 1.99E-08 | 0.111695  | 0.039 | 0.017 | 0.000480405 | 2.2 | METAP1D   | 2.294117647 |
| RGMB-AS11      | 2.05E-08 | 0.1075173 | 0.031 | 0.013 | 0.000493715 | 2.2 | RGMB-AS1  | 2.384615385 |
| PDE11A         | 2.11E-08 | 0.2051118 | 0.063 | 0.034 | 0.000508393 | 2.2 | PDE11A    | 1.852941176 |

|                  |          |           |       |       |             |     |                  |             |
|------------------|----------|-----------|-------|-------|-------------|-----|------------------|-------------|
| ZFAND51          | 2.13E-08 | 0.3193637 | 0.461 | 0.435 | 0.000514038 | 2.2 | ZFAND5           | 1.059770115 |
| AGA1             | 2.15E-08 | 0.1640691 | 0.06  | 0.032 | 0.000518622 | 2.2 | AGA              | 1.875       |
| HRSP122          | 2.16E-08 | 0.2267534 | 0.109 | 0.07  | 0.000521693 | 2.2 | HRSP12           | 1.557142857 |
| GGCT2            | 2.30E-08 | 0.2113836 | 0.09  | 0.054 | 0.000554526 | 2.2 | GGCT             | 1.666666667 |
| LLNLR-245B6.1    | 2.34E-08 | 0.2105853 | 0.099 | 0.062 | 0.000564091 | 2.2 | LLNLR-245B6.1    | 1.596774194 |
| CHMP2A           | 2.44E-08 | 0.2414153 | 0.133 | 0.09  | 0.000587647 | 2.2 | CHMP2A           | 1.477777778 |
| SERTAD41         | 2.60E-08 | 0.1002272 | 0.026 | 0.009 | 0.000627223 | 2.2 | SERTAD4          | 2.888888889 |
| DCAF51           | 2.61E-08 | 0.3755263 | 0.19  | 0.145 | 0.000628326 | 2.2 | DCAF5            | 1.310344828 |
| KNOP12           | 2.62E-08 | 0.381914  | 0.19  | 0.144 | 0.000632117 | 2.2 | KNOP1            | 1.319444444 |
| RSRC22           | 2.72E-08 | 0.2209847 | 0.618 | 0.626 | 0.000655408 | 2.2 | RSRC2            | 0.987220447 |
| LGMN1            | 2.74E-08 | 0.177871  | 0.084 | 0.05  | 0.00066138  | 2.2 | LGMN             | 1.68        |
| CCNG21           | 2.82E-08 | 0.2956254 | 0.261 | 0.21  | 0.000680239 | 2.2 | CCNG2            | 1.242857143 |
| RP11-347P5.11    | 2.91E-08 | 0.1880153 | 0.077 | 0.044 | 0.00070079  | 2.2 | RP11-347P5.11    | 1.75        |
| DCP1A1           | 2.91E-08 | 0.3672328 | 0.304 | 0.262 | 0.00070106  | 2.2 | DCP1A            | 1.160305344 |
| INTS61           | 3.07E-08 | 0.364163  | 0.33  | 0.281 | 0.000740576 | 2.2 | INTS6            | 1.174377224 |
| DNALI11          | 3.23E-08 | 0.1015835 | 0.038 | 0.017 | 0.000779411 | 2.2 | DNALI1           | 2.235294118 |
| LAMTOR52         | 3.29E-08 | 0.2809767 | 0.593 | 0.587 | 0.00079335  | 2.2 | LAMTOR5          | 1.010221465 |
| DHX30            | 3.33E-08 | 0.2262263 | 0.103 | 0.065 | 0.000802299 | 2.2 | DHX30            | 1.584615385 |
| RP4-633O19--A.12 | 3.35E-08 | 0.1510829 | 0.041 | 0.019 | 0.000808899 | 2.2 | RP4-633O19--A.12 | 2.157894737 |
| MAP9             | 3.36E-08 | 0.1439977 | 0.049 | 0.024 | 0.000810586 | 2.2 | MAP9             | 2.041666667 |
| PKIA1            | 3.45E-08 | 0.1200396 | 0.033 | 0.014 | 0.000831504 | 2.2 | PKIA             | 2.357142857 |
| PDIA62           | 3.54E-08 | 0.3366378 | 0.276 | 0.229 | 0.000852458 | 2.2 | PDIA6            | 1.205240175 |
| ANKRD121         | 3.92E-08 | 0.3012118 | 0.66  | 0.675 | 0.000945554 | 2.2 | ANKRD12          | 0.977777778 |
| PCCB             | 3.94E-08 | 0.1406906 | 0.058 | 0.031 | 0.000950898 | 2.2 | PCCB             | 1.870967742 |
| RAD211           | 4.06E-08 | 0.3435932 | 0.369 | 0.335 | 0.000979219 | 2.2 | RAD21            | 1.101492537 |
| ARL5A1           | 4.22E-08 | 0.2701727 | 0.146 | 0.103 | 0.001018473 | 2.2 | ARL5A            | 1.417475728 |
| EDEM31           | 4.30E-08 | 0.2560369 | 0.129 | 0.087 | 0.001037835 | 2.2 | EDEM3            | 1.482758621 |
| FAM229B          | 4.34E-08 | 0.2168098 | 0.098 | 0.062 | 0.001045512 | 2.2 | FAM229B          | 1.580645161 |
| SERP12           | 4.64E-08 | 0.3420765 | 0.292 | 0.252 | 0.001118043 | 2.2 | SERP1            | 1.158730159 |
| APH1A            | 4.91E-08 | 0.1864221 | 0.065 | 0.036 | 0.00118447  | 2.2 | APH1A            | 1.805555556 |
| COPA1            | 4.99E-08 | 0.3769139 | 0.352 | 0.317 | 0.001203769 | 2.2 | COPA             | 1.110410095 |
| XRN21            | 5.01E-08 | 0.2592521 | 0.256 | 0.207 | 0.001208597 | 2.2 | XRN2             | 1.236714976 |
| PHKG11           | 5.02E-08 | 0.2485778 | 0.104 | 0.066 | 0.001210661 | 2.2 | PHKG1            | 1.575757576 |
| BECN1            | 5.24E-08 | 0.2307053 | 0.106 | 0.069 | 0.00126445  | 2.2 | BECN1            | 1.536231884 |
| ANKH2            | 5.36E-08 | 0.2415318 | 0.129 | 0.088 | 0.001292136 | 2.2 | ANKH             | 1.465909091 |
| CCDC252          | 5.58E-08 | 0.2880758 | 0.132 | 0.092 | 0.001346073 | 2.2 | CCDC25           | 1.434782609 |
| PDZD111          | 5.68E-08 | 0.2392903 | 0.128 | 0.087 | 0.00137072  | 2.2 | PDZD11           | 1.471264368 |
| SMARCC11         | 5.92E-08 | 0.3341611 | 0.332 | 0.289 | 0.001428026 | 2.2 | SMARCC1          | 1.148788927 |
| PSMC51           | 6.13E-08 | 0.2679849 | 0.136 | 0.095 | 0.001479105 | 2.2 | PSMC5            | 1.431578947 |
| FSIP11           | 6.14E-08 | 0.1861045 | 0.085 | 0.051 | 0.001481591 | 2.2 | FSIP1            | 1.666666667 |
| RRAGC1           | 6.29E-08 | 0.2141696 | 0.115 | 0.076 | 0.00151681  | 2.2 | RRAGC            | 1.513157895 |
| SELT             | 6.89E-08 | 0.2309249 | 0.115 | 0.076 | 0.00166019  | 2.2 | SELT             | 1.513157895 |
| AHSA1            | 6.97E-08 | 0.1647265 | 0.063 | 0.035 | 0.001679892 | 2.2 | AHSA1            | 1.8         |
| AF127577.111     | 7.02E-08 | 0.1868492 | 0.077 | 0.045 | 0.001692717 | 2.2 | AF127577.111     | 1.711111111 |
| S100A134         | 7.13E-08 | 0.2681376 | 0.536 | 0.513 | 0.001718406 | 2.2 | S100A13          | 1.044834308 |
| ACAA2            | 7.39E-08 | 0.1795948 | 0.062 | 0.034 | 0.001782193 | 2.2 | ACAA2            | 1.823529412 |
| ZBTB411          | 7.46E-08 | 0.1945445 | 0.076 | 0.044 | 0.001799316 | 2.2 | ZBTB41           | 1.727272727 |
| PAFAH2           | 7.62E-08 | 0.1217326 | 0.043 | 0.02  | 0.001836701 | 2.2 | PAFAH2           | 2.15        |
| CALM3            | 7.65E-08 | 0.1225777 | 0.046 | 0.023 | 0.001845317 | 2.2 | CALM3            | 2           |
| RAPH11           | 7.73E-08 | 0.3965503 | 0.371 | 0.336 | 0.00186468  | 2.2 | RAPH1            | 1.104166667 |
| SPAG92           | 8.04E-08 | 0.4154888 | 0.375 | 0.345 | 0.00193814  | 2.2 | SPAG9            | 1.086956522 |
| NR6A11           | 8.69E-08 | 0.4915637 | 0.387 | 0.351 | 0.002094744 | 2.2 | NR6A1            | 1.102564103 |

|              |          |           |       |       |             |     |           |             |
|--------------|----------|-----------|-------|-------|-------------|-----|-----------|-------------|
| TM9SF32      | 9.57E-08 | 0.334084  | 0.347 | 0.31  | 0.002308704 | 2.2 | TM9SF3    | 1.119354839 |
| LNK21        | 1.00E-07 | 0.3131009 | 0.191 | 0.146 | 0.002415727 | 2.2 | LNK2      | 1.308219178 |
| FAM111A2     | 1.04E-07 | 0.1775354 | 0.058 | 0.031 | 0.002498883 | 2.2 | FAM111A   | 1.870967742 |
| CCDC342      | 1.05E-07 | 0.1119136 | 0.044 | 0.021 | 0.002543145 | 2.2 | CCDC34    | 2.095238095 |
| EBAG9        | 1.06E-07 | 0.14904   | 0.063 | 0.035 | 0.002560351 | 2.2 | EBAG9     | 1.8         |
| USP71        | 1.10E-07 | 0.2639792 | 0.134 | 0.093 | 0.002664218 | 2.2 | USP7      | 1.440860215 |
| VDAC1        | 1.18E-07 | 0.2895773 | 0.255 | 0.211 | 0.002839883 | 2.2 | VDAC1     | 1.208530806 |
| PAK4         | 1.18E-07 | 0.2173993 | 0.074 | 0.044 | 0.002846805 | 2.2 | PAK4      | 1.681818182 |
| GDPD41       | 1.25E-07 | 0.3523734 | 0.027 | 0.01  | 0.003002537 | 2.2 | GDPD4     | 2.7         |
| CUX2         | 1.27E-07 | 0.1833839 | 0.058 | 0.031 | 0.003070196 | 2.2 | CUX2      | 1.870967742 |
| SIAE1        | 1.28E-07 | 0.1916014 | 0.076 | 0.045 | 0.003088242 | 2.2 | SIAE      | 1.688888889 |
| MDK          | 1.29E-07 | 0.1358859 | 0.057 | 0.031 | 0.003107563 | 2.2 | MDK       | 1.838709677 |
| FAM174B      | 1.36E-07 | 0.2239397 | 0.109 | 0.072 | 0.003286776 | 2.2 | FAM174B   | 1.513888889 |
| SYK          | 1.37E-07 | 0.1033386 | 0.034 | 0.015 | 0.003300101 | 2.2 | SYK       | 2.266666667 |
| C8orf594     | 1.40E-07 | 0.3393849 | 0.323 | 0.285 | 0.003365945 | 2.2 | C8orf59   | 1.133333333 |
| ENAH2        | 1.42E-07 | 0.4192269 | 0.549 | 0.555 | 0.003436016 | 2.2 | ENAH      | 0.989189189 |
| ADIRF1       | 1.43E-07 | 0.2707043 | 0.104 | 0.066 | 0.00344008  | 2.2 | ADIRF     | 1.575757576 |
| ERP29        | 1.45E-07 | 0.2626082 | 0.166 | 0.122 | 0.003491664 | 2.2 | ERP29     | 1.360655738 |
| SLC38A11     | 1.46E-07 | 0.2977506 | 0.426 | 0.393 | 0.00353178  | 2.2 | SLC38A1   | 1.083969466 |
| CDC422       | 1.50E-07 | 0.2053606 | 0.705 | 0.718 | 0.003620397 | 2.2 | CDC42     | 0.98189415  |
| RPS10-NUDT31 | 1.51E-07 | 0.1788461 | 0.077 | 0.046 | 0.003643337 | 2.2 | RPS10-NUC | 1.673913043 |
| EI241        | 1.56E-07 | 0.2524189 | 0.115 | 0.077 | 0.003764896 | 2.2 | EI24      | 1.493506494 |
| H2AFY1       | 1.56E-07 | 0.3188813 | 0.19  | 0.147 | 0.003766935 | 2.2 | H2AFY     | 1.292517007 |
| VPS251       | 1.65E-07 | 0.274675  | 0.18  | 0.137 | 0.00397576  | 2.2 | VPS25     | 1.313868613 |
| STK17B1      | 1.69E-07 | 0.3122421 | 0.203 | 0.158 | 0.004065414 | 2.2 | STK17B    | 1.284810127 |
| TMEM2541     | 1.81E-07 | 0.185263  | 0.072 | 0.043 | 0.00435529  | 2.2 | TMEM254   | 1.674418605 |
| TMEM41B1     | 1.81E-07 | 0.3332995 | 0.291 | 0.248 | 0.004358327 | 2.2 | TMEM41B   | 1.173387097 |
| PHLDB21      | 1.87E-07 | 0.3479506 | 0.453 | 0.419 | 0.004508469 | 2.2 | PHLDB2    | 1.081145585 |
| ZFC3H11      | 1.87E-07 | 0.3601772 | 0.298 | 0.258 | 0.004517793 | 2.2 | ZFC3H1    | 1.15503876  |
| DYNLL2       | 1.98E-07 | 0.1597712 | 0.066 | 0.038 | 0.004784151 | 2.2 | DYNLL2    | 1.736842105 |
| DPH62        | 1.99E-07 | 0.2527703 | 0.1   | 0.065 | 0.004804596 | 2.2 | DPH6      | 1.538461538 |
| PCSK6        | 2.01E-07 | 0.2134155 | 0.069 | 0.04  | 0.004844655 | 2.2 | PCSK6     | 1.725       |
| CDC272       | 2.29E-07 | 0.3692025 | 0.302 | 0.262 | 0.005528546 | 2.2 | CDC27     | 1.152671756 |
| ZNF101       | 2.57E-07 | 0.1072452 | 0.037 | 0.017 | 0.006199529 | 2.2 | ZNF101    | 2.176470588 |
| PCLO1        | 2.57E-07 | 0.1839136 | 0.082 | 0.05  | 0.006208576 | 2.2 | PCLO      | 1.64        |
| KMT2E1       | 2.58E-07 | 0.5563074 | 0.461 | 0.468 | 0.006218874 | 2.2 | KMT2E     | 0.985042735 |
| PEMT1        | 2.58E-07 | 0.3585534 | 0.066 | 0.038 | 0.006226444 | 2.2 | PEMT      | 1.736842105 |
| BMP2K1       | 2.73E-07 | 0.2354432 | 0.14  | 0.099 | 0.006581999 | 2.2 | BMP2K     | 1.414141414 |
| STX31        | 2.89E-07 | 0.277684  | 0.182 | 0.138 | 0.006967387 | 2.2 | STX3      | 1.31884058  |
| USP241       | 3.01E-07 | 0.3087307 | 0.212 | 0.169 | 0.007258848 | 2.2 | USP24     | 1.25443787  |
| PEAK11       | 3.01E-07 | 0.473696  | 0.306 | 0.266 | 0.007267929 | 2.2 | PEAK1     | 1.15037594  |
| HMGCLL1      | 3.02E-07 | 0.1467691 | 0.07  | 0.041 | 0.007271916 | 2.2 | HMGCLL1   | 1.707317073 |
| BRIX11       | 3.02E-07 | 0.2715234 | 0.15  | 0.108 | 0.007278751 | 2.2 | BRIX1     | 1.388888889 |
| SNU131       | 3.05E-07 | 0.2814674 | 0.494 | 0.477 | 0.007362062 | 2.2 | SNU13     | 1.035639413 |
| FAM213A      | 3.32E-07 | 0.302381  | 0.16  | 0.119 | 0.008011921 | 2.2 | FAM213A   | 1.344537815 |
| LINC00578    | 3.41E-07 | 0.5600703 | 0.11  | 0.073 | 0.008219862 | 2.2 | LINC00578 | 1.506849315 |
| ATP5B        | 3.49E-07 | 0.2966077 | 0.268 | 0.227 | 0.008412126 | 2.2 | ATP5B     | 1.18061674  |
| GRAP2        | 3.54E-07 | 0.1127876 | 0.035 | 0.016 | 0.008544719 | 2.2 | GRAP2     | 2.1875      |
| QSOX11       | 3.60E-07 | 0.2780766 | 0.196 | 0.151 | 0.008670028 | 2.2 | QSOX1     | 1.298013245 |
| CHD4         | 3.66E-07 | 0.2685425 | 0.171 | 0.129 | 0.008823733 | 2.2 | CHD4      | 1.325581395 |
| TMEM147      | 3.84E-07 | 0.1391592 | 0.046 | 0.024 | 0.0092608   | 2.2 | TMEM147   | 1.916666667 |
| DNAJA41      | 4.21E-07 | 0.1488073 | 0.049 | 0.026 | 0.01014832  | 2.2 | DNAJA4    | 1.884615385 |

|               |          |           |       |       |            |     |           |             |
|---------------|----------|-----------|-------|-------|------------|-----|-----------|-------------|
| TSPAN312      | 4.28E-07 | 0.2186283 | 0.085 | 0.054 | 0.01032155 | 2.2 | TSPAN31   | 1.574074074 |
| KRT18         | 4.33E-07 | 0.2342646 | 0.149 | 0.108 | 0.01043207 | 2.2 | KRT18     | 1.37962963  |
| NCEH11        | 4.35E-07 | 0.3225301 | 0.449 | 0.413 | 0.01048301 | 2.2 | NCEH1     | 1.08716707  |
| PACSIN2       | 4.49E-07 | 0.3152176 | 0.316 | 0.274 | 0.01083123 | 2.2 | PACSIN2   | 1.153284672 |
| TBC1D12       | 4.59E-07 | 0.2330664 | 0.115 | 0.078 | 0.01107209 | 2.2 | TBC1D12   | 1.474358974 |
| MAP2K41       | 4.74E-07 | 0.2703482 | 0.47  | 0.443 | 0.01142213 | 2.2 | MAP2K4    | 1.060948081 |
| ILF3          | 4.85E-07 | 0.1796581 | 0.09  | 0.057 | 0.01168807 | 2.2 | ILF3      | 1.578947368 |
| TRA2A1        | 4.85E-07 | 0.3398622 | 0.422 | 0.401 | 0.01170082 | 2.2 | TRA2A     | 1.052369077 |
| POLE4         | 5.22E-07 | 0.1211486 | 0.04  | 0.019 | 0.01258877 | 2.2 | POLE4     | 2.105263158 |
| RPS184        | 5.65E-07 | 0.16135   | 0.652 | 0.635 | 0.0136329  | 2.2 | RPS18     | 1.026771654 |
| HIPK11        | 5.97E-07 | 0.2643882 | 0.175 | 0.133 | 0.01439364 | 2.2 | HIPK1     | 1.315789474 |
| DRC3          | 6.09E-07 | 0.1819926 | 0.061 | 0.035 | 0.01467533 | 2.2 | DRC3      | 1.742857143 |
| DGKD1         | 6.42E-07 | 0.2680719 | 0.165 | 0.123 | 0.01547965 | 2.2 | DGKD      | 1.341463415 |
| EPT11         | 6.91E-07 | 0.2269415 | 0.133 | 0.095 | 0.01665608 | 2.2 | EPT1      | 1.4         |
| SRPRB1        | 6.93E-07 | 0.1539333 | 0.064 | 0.037 | 0.01671158 | 2.2 | SRPRB     | 1.72972973  |
| LINC014202    | 6.96E-07 | 0.291648  | 0.402 | 0.375 | 0.01679278 | 2.2 | LINC01420 | 1.072       |
| RAB27B1       | 7.08E-07 | 0.1947666 | 0.199 | 0.151 | 0.01707773 | 2.2 | RAB27B    | 1.317880795 |
| BRK14         | 7.30E-07 | 0.2550622 | 0.599 | 0.608 | 0.01759355 | 2.2 | BRK1      | 0.985197368 |
| RARA1         | 7.44E-07 | 0.1519415 | 0.041 | 0.021 | 0.01793881 | 2.2 | RARA      | 1.952380952 |
| NSA24         | 7.55E-07 | 0.2771961 | 0.376 | 0.345 | 0.01820704 | 2.2 | NSA2      | 1.089855072 |
| GATSL21       | 7.72E-07 | 0.1544626 | 0.065 | 0.038 | 0.01862491 | 2.2 | GATSL2    | 1.710526316 |
| TCEB3-AS1     | 7.81E-07 | 0.1399322 | 0.041 | 0.021 | 0.01883265 | 2.2 | TCEB3-AS1 | 1.952380952 |
| ACSM31        | 7.83E-07 | 0.1979781 | 0.072 | 0.043 | 0.01887135 | 2.2 | ACSM3     | 1.674418605 |
| PDHX1         | 7.90E-07 | 0.2264407 | 0.109 | 0.075 | 0.01905464 | 2.2 | PDHX      | 1.453333333 |
| GPR39         | 7.99E-07 | 0.122166  | 0.035 | 0.017 | 0.01926053 | 2.2 | GPR39     | 2.058823529 |
| VAPA2         | 8.47E-07 | 0.25602   | 0.482 | 0.475 | 0.02042079 | 2.2 | VAPA      | 1.014736842 |
| ZBTB181       | 9.03E-07 | 0.2563406 | 0.106 | 0.072 | 0.02177799 | 2.2 | ZBTB18    | 1.472222222 |
| THYN12        | 9.28E-07 | 0.1510296 | 0.06  | 0.035 | 0.02237146 | 2.2 | THYN1     | 1.714285714 |
| VBP11         | 9.69E-07 | 0.2798102 | 0.181 | 0.141 | 0.02335603 | 2.2 | VBP1      | 1.283687943 |
| MAP3K191      | 9.72E-07 | 0.1072084 | 0.043 | 0.022 | 0.02343839 | 2.2 | MAP3K19   | 1.954545455 |
| KMT2A2        | 9.72E-07 | 0.3539078 | 0.433 | 0.421 | 0.02344784 | 2.2 | KMT2A     | 1.028503563 |
| ZMPSTE24      | 9.74E-07 | 0.2348192 | 0.107 | 0.073 | 0.02349249 | 2.2 | ZMPSTE24  | 1.465753425 |
| GABPB11       | 1.03E-06 | 0.2953466 | 0.157 | 0.117 | 0.02479387 | 2.2 | GABPB1    | 1.341880342 |
| MRPL37        | 1.03E-06 | 0.157883  | 0.078 | 0.048 | 0.02488614 | 2.2 | MRPL3     | 1.625       |
| NHSL22        | 1.04E-06 | 0.2968594 | 0.314 | 0.278 | 0.02505861 | 2.2 | NHSL2     | 1.129496403 |
| MIEN1         | 1.05E-06 | 0.1972518 | 0.089 | 0.057 | 0.02540827 | 2.2 | MIEN1     | 1.561403509 |
| NET11         | 1.06E-06 | 0.3848051 | 0.229 | 0.19  | 0.02556437 | 2.2 | NET1      | 1.205263158 |
| HIVEP21       | 1.06E-06 | 0.3975711 | 0.465 | 0.451 | 0.02566609 | 2.2 | HIVEP2    | 1.031042129 |
| EPCAM         | 1.18E-06 | 0.2862189 | 0.252 | 0.212 | 0.02855069 | 2.2 | EPCAM     | 1.188679245 |
| SREK1         | 1.18E-06 | 0.2938641 | 0.203 | 0.164 | 0.02856342 | 2.2 | SREK1     | 1.237804878 |
| ERGIC32       | 1.20E-06 | 0.2564132 | 0.359 | 0.324 | 0.02894635 | 2.2 | ERGIC3    | 1.108024691 |
| NAALADL2      | 1.25E-06 | 0.2349081 | 0.54  | 0.502 | 0.03008615 | 2.2 | NAALADL2  | 1.075697211 |
| COX7A2L4      | 1.41E-06 | 0.2566129 | 0.511 | 0.499 | 0.03393768 | 2.2 | COX7A2L   | 1.024048096 |
| ATF22         | 1.41E-06 | 0.235621  | 0.18  | 0.139 | 0.03397981 | 2.2 | ATF2      | 1.294964029 |
| EMC3          | 1.43E-06 | 0.3055374 | 0.275 | 0.236 | 0.03441495 | 2.2 | EMC3      | 1.165254237 |
| USP251        | 1.44E-06 | 0.3880216 | 0.295 | 0.259 | 0.03472988 | 2.2 | USP25     | 1.138996139 |
| JTB1          | 1.49E-06 | 0.1961012 | 0.08  | 0.05  | 0.03594221 | 2.2 | JTB       | 1.6         |
| CTD-2349B8.11 | 1.52E-06 | 0.2997443 | 0.03  | 0.014 | 0.03663996 | 2.2 | CTD-2349B | 2.142857143 |
| HINT13        | 1.53E-06 | 0.1928753 | 0.615 | 0.602 | 0.0370019  | 2.2 | HINT1     | 1.021594684 |
| CASZ11        | 1.56E-06 | 0.2389688 | 0.133 | 0.096 | 0.03766365 | 2.2 | CASZ1     | 1.385416667 |
| ARMCX32       | 1.58E-06 | 0.277207  | 0.164 | 0.126 | 0.03798812 | 2.2 | ARMCX3    | 1.301587302 |
| VSIG2         | 1.58E-06 | 0.1034094 | 0.024 | 0.01  | 0.03805486 | 2.2 | VSIG2     | 2.4         |

|                |           |           |       |       |            |     |           |             |
|----------------|-----------|-----------|-------|-------|------------|-----|-----------|-------------|
| USP541         | 1.63E-06  | 0.286642  | 0.51  | 0.496 | 0.0392926  | 2.2 | USP54     | 1.028225806 |
| WDR35          | 1.63E-06  | 0.1427323 | 0.046 | 0.024 | 0.03940674 | 2.2 | WDR35     | 1.916666667 |
| MRPL132        | 1.70E-06  | 0.2825536 | 0.204 | 0.166 | 0.04092257 | 2.2 | MRPL13    | 1.228915663 |
| ELMO21         | 1.70E-06  | 0.2761737 | 0.13  | 0.094 | 0.0410605  | 2.2 | ELMO2     | 1.382978723 |
| INTS122        | 1.71E-06  | 0.283043  | 0.249 | 0.209 | 0.04118378 | 2.2 | INTS12    | 1.19138756  |
| LYPD6          | 1.71E-06  | 0.1910469 | 0.08  | 0.051 | 0.04133562 | 2.2 | LYPD6     | 1.568627451 |
| NDUFB51        | 1.74E-06  | 0.1855773 | 0.07  | 0.043 | 0.04194799 | 2.2 | NDUFB5    | 1.627906977 |
| NENF           | 1.74E-06  | 0.208753  | 0.1   | 0.067 | 0.04195705 | 2.2 | NENF      | 1.492537313 |
| INTU           | 1.74E-06  | 0.1852871 | 0.082 | 0.052 | 0.04206821 | 2.2 | INTU      | 1.576923077 |
| ADI1           | 1.89E-06  | 0.1117641 | 0.041 | 0.021 | 0.04553999 | 2.2 | ADI1      | 1.952380952 |
| MTRNR2L122     | 1.90E-06  | 0.4407833 | 0.259 | 0.223 | 0.04570152 | 2.2 | MTRNR2L1  | 1.161434978 |
| CPE1           | 1.93E-06  | 0.1578804 | 0.254 | 0.203 | 0.04645804 | 2.2 | CPE       | 1.251231527 |
| GSTCD1         | 1.94E-06  | 0.2371758 | 0.147 | 0.108 | 0.04686752 | 2.2 | GSTCD     | 1.361111111 |
| GMNN1          | 1.95E-06  | 0.1137498 | 0.037 | 0.018 | 0.04703036 | 2.2 | GMNN      | 2.055555556 |
| FABP61         | 1.96E-06  | 0.6807932 | 0.063 | 0.037 | 0.04715043 | 2.2 | FABP6     | 1.702702703 |
| SPRED12        | 2.02E-06  | 0.2253689 | 0.114 | 0.08  | 0.04862009 | 2.2 | SPRED1    | 1.425       |
| CTSZ1          | 2.02E-06  | 0.1927455 | 0.096 | 0.064 | 0.0487802  | 2.2 | CTSZ      | 1.5         |
| ATP5A1         | 2.03E-06  | 0.3149292 | 0.225 | 0.188 | 0.04906044 | 2.2 | ATP5A1    | 1.196808511 |
| PDE4C          | 0         | 1.700709  | 0.355 | 0.013 | 0          | 2.3 | PDE4C     | 27.30769231 |
| BRIP11         | 0         | 1.59251   | 0.388 | 0.033 | 0          | 2.3 | BRIP1     | 11.75757576 |
| THEMIS         | 0         | 1.433846  | 0.257 | 0.004 | 0          | 2.3 | THEMIS    | 64.25       |
| PPP1R36        | 0         | 1.1843    | 0.271 | 0.009 | 0          | 2.3 | PPP1R36   | 30.11111111 |
| SNX312         | 0         | 1.158716  | 0.313 | 0.027 | 0          | 2.3 | SNX31     | 11.59259259 |
| SERPINE31      | 0         | 0.9810794 | 0.24  | 0.013 | 0          | 2.3 | SERPINE3  | 18.46153846 |
| AC019117.11    | 0         | 0.9363484 | 0.208 | 0.01  | 0          | 2.3 | AC019117. | 20.8        |
| KIAA0319       | 0         | 0.8524833 | 0.191 | 0.003 | 0          | 2.3 | KIAA0319  | 63.66666667 |
| RP11-838N2.5   | 0         | 0.693588  | 0.139 | 0.004 | 0          | 2.3 | RP11-838N | 34.75       |
| DNAH121        | 2.53E-285 | 1.109763  | 0.232 | 0.018 | 6.10E-281  | 2.3 | DNAH12    | 12.88888889 |
| GLRA11         | 1.41E-283 | 0.797412  | 0.195 | 0.012 | 3.39E-279  | 2.3 | GLRA1     | 16.25       |
| TRIM72         | 6.32E-277 | 0.5200048 | 0.115 | 0.003 | 1.52E-272  | 2.3 | TRIM72    | 38.33333333 |
| BMPR1B2        | 2.08E-274 | 1.760554  | 0.362 | 0.049 | 5.00E-270  | 2.3 | BMPR1B    | 7.387755102 |
| SEMA4A         | 1.32E-266 | 0.9805392 | 0.235 | 0.02  | 3.19E-262  | 2.3 | SEMA4A    | 11.75       |
| GSTM32         | 1.03E-259 | 2.310478  | 0.802 | 0.313 | 2.49E-255  | 2.3 | GSTM3     | 2.562300319 |
| LRRC231        | 4.90E-229 | 1.509332  | 0.412 | 0.076 | 1.18E-224  | 2.3 | LRRC23    | 5.421052632 |
| CXCL132        | 5.13E-226 | 2.237112  | 0.881 | 0.397 | 1.24E-221  | 2.3 | CXCL13    | 2.219143577 |
| IL19           | 2.18E-225 | 0.3865265 | 0.086 | 0.002 | 5.25E-221  | 2.3 | IL19      | 43          |
| AGR22          | 3.92E-221 | 1.779388  | 0.695 | 0.229 | 9.44E-217  | 2.3 | AGR2      | 3.034934498 |
| C3orf581       | 1.33E-212 | 1.004788  | 0.256 | 0.031 | 3.20E-208  | 2.3 | C3orf58   | 8.258064516 |
| MANBA1         | 1.74E-210 | 1.128195  | 0.341 | 0.055 | 4.19E-206  | 2.3 | MANBA     | 6.2         |
| PTGER31        | 2.09E-209 | 1.153409  | 0.263 | 0.033 | 5.05E-205  | 2.3 | PTGER3    | 7.96969697  |
| COX6C2         | 4.55E-206 | 1.621179  | 0.954 | 0.757 | 1.10E-201  | 2.3 | COX6C     | 1.260237781 |
| GUCY2C1        | 2.27E-202 | 0.5273996 | 0.117 | 0.005 | 5.48E-198  | 2.3 | GUCY2C    | 23.4        |
| NOP2           | 1.25E-199 | 0.919281  | 0.221 | 0.024 | 3.02E-195  | 2.3 | NOP2      | 9.208333333 |
| RP11-215A19.21 | 2.76E-198 | 0.3807727 | 0.09  | 0.003 | 6.65E-194  | 2.3 | RP11-215A | 30          |
| RAB261         | 9.42E-197 | 1.020379  | 0.243 | 0.03  | 2.27E-192  | 2.3 | RAB26     | 8.1         |
| RAB44          | 1.79E-191 | 0.4190113 | 0.09  | 0.003 | 4.32E-187  | 2.3 | RAB44     | 30          |
| MLIP1          | 2.43E-187 | 0.7458298 | 0.149 | 0.011 | 5.86E-183  | 2.3 | MLIP      | 13.54545455 |
| CPED11         | 2.58E-182 | 0.6387163 | 0.152 | 0.012 | 6.21E-178  | 2.3 | CPED1     | 12.66666667 |
| RNASEH2A       | 6.20E-182 | 0.5294947 | 0.112 | 0.006 | 1.50E-177  | 2.3 | RNASEH2A  | 18.66666667 |
| AMPD3          | 4.42E-179 | 0.9458427 | 0.237 | 0.031 | 1.06E-174  | 2.3 | AMPD3     | 7.64516129  |
| DNAJC122       | 6.80E-177 | 1.471731  | 0.812 | 0.378 | 1.64E-172  | 2.3 | DNAJC12   | 2.148148148 |
| DNAJB14        | 2.79E-172 | 1.396849  | 0.445 | 0.116 | 6.73E-168  | 2.3 | DNAJB14   | 3.836206897 |



|                |           |           |       |       |           |     |            |             |
|----------------|-----------|-----------|-------|-------|-----------|-----|------------|-------------|
| MAP7D22        | 4.46E-172 | 0.9541408 | 0.267 | 0.041 | 1.08E-167 | 2.3 | MAP7D2     | 6.512195122 |
| C8orf42        | 3.66E-171 | 1.603616  | 0.909 | 0.507 | 8.82E-167 | 2.3 | C8orf4     | 1.792899408 |
| C5orf47        | 4.63E-171 | 0.3555634 | 0.073 | 0.002 | 1.12E-166 | 2.3 | C5orf47    | 36.5        |
| ANKRD30A2      | 1.06E-167 | 1.169413  | 0.92  | 0.458 | 2.55E-163 | 2.3 | ANKRD30A   | 2.008733624 |
| LLfos-48D6.2   | 3.13E-162 | 0.6405589 | 0.177 | 0.019 | 7.54E-158 | 2.3 | LLfos-48D6 | 9.315789474 |
| AREG2          | 2.29E-161 | 1.397413  | 0.861 | 0.438 | 5.52E-157 | 2.3 | AREG       | 1.965753425 |
| RP11-342D14.1  | 1.13E-160 | 0.3169915 | 0.069 | 0.002 | 2.72E-156 | 2.3 | RP11-342D  | 34.5        |
| RYBP2          | 1.08E-158 | 1.402273  | 0.521 | 0.169 | 2.61E-154 | 2.3 | RYBP       | 3.082840237 |
| INTS21         | 1.36E-156 | 0.8651931 | 0.247 | 0.038 | 3.29E-152 | 2.3 | INTS2      | 6.5         |
| LINC01004      | 4.50E-156 | 1.166345  | 0.333 | 0.07  | 1.08E-151 | 2.3 | LINC01004  | 4.757142857 |
| PRX            | 9.50E-155 | 0.3843071 | 0.069 | 0.002 | 2.29E-150 | 2.3 | PRX        | 34.5        |
| GPR75-ASB31    | 6.41E-151 | 1.439405  | 0.494 | 0.157 | 1.55E-146 | 2.3 | GPR75-ASB  | 3.146496815 |
| AGR32          | 5.83E-149 | 1.572717  | 0.577 | 0.206 | 1.41E-144 | 2.3 | AGR3       | 2.800970874 |
| HEXIM1         | 5.35E-146 | 1.176485  | 0.301 | 0.061 | 1.29E-141 | 2.3 | HEXIM1     | 4.93442623  |
| TPH21          | 7.08E-143 | 0.5927313 | 0.157 | 0.017 | 1.71E-138 | 2.3 | TPH2       | 9.235294118 |
| RP11-863K10.2  | 3.48E-141 | 0.2311424 | 0.042 | 0     | 8.38E-137 | 2.3 | RP11-863K  | #DIV/0!     |
| INTS62         | 5.60E-141 | 1.317405  | 0.642 | 0.271 | 1.35E-136 | 2.3 | INTS6      | 2.36900369  |
| RP11-110L15.2  | 1.36E-140 | 0.3380525 | 0.069 | 0.002 | 3.27E-136 | 2.3 | RP11-110L  | 34.5        |
| HOMER12        | 2.24E-140 | 1.214677  | 0.399 | 0.106 | 5.39E-136 | 2.3 | HOMER1     | 3.764150943 |
| ACOT121        | 3.62E-139 | 0.501513  | 0.107 | 0.007 | 8.74E-135 | 2.3 | ACOT12     | 15.28571429 |
| ELOVL52        | 1.99E-137 | 1.337235  | 0.657 | 0.284 | 4.80E-133 | 2.3 | ELOVL5     | 2.313380282 |
| SDC22          | 3.97E-137 | 1.051569  | 0.324 | 0.072 | 9.57E-133 | 2.3 | SDC2       | 4.5         |
| PTHLH2         | 2.11E-136 | 1.348186  | 0.597 | 0.225 | 5.08E-132 | 2.3 | PTHLH      | 2.653333333 |
| RP11-554D13.11 | 8.55E-135 | 0.5782514 | 0.149 | 0.016 | 2.06E-130 | 2.3 | RP11-554D  | 9.3125      |
| NME71          | 3.59E-134 | 1.388272  | 0.449 | 0.138 | 8.66E-130 | 2.3 | NME7       | 3.253623188 |
| FXYD32         | 1.42E-132 | 1.409986  | 0.872 | 0.626 | 3.41E-128 | 2.3 | FXYD3      | 1.392971246 |
| SH3BGRL4       | 4.89E-132 | 1.246476  | 0.743 | 0.391 | 1.18E-127 | 2.3 | SH3BGRL    | 1.900255754 |
| HMP19          | 1.09E-131 | 0.4149695 | 0.074 | 0.003 | 2.63E-127 | 2.3 | HMP19      | 24.66666667 |
| AZGP12         | 4.48E-130 | 1.181189  | 0.869 | 0.538 | 1.08E-125 | 2.3 | AZGP1      | 1.615241636 |
| SERP21         | 8.62E-130 | 0.6764402 | 0.167 | 0.021 | 2.08E-125 | 2.3 | SERP2      | 7.952380952 |
| DIO22          | 4.90E-129 | 1.797863  | 0.566 | 0.213 | 1.18E-124 | 2.3 | DIO2       | 2.657276995 |
| TNFSF111       | 8.72E-129 | 1.024455  | 0.275 | 0.055 | 2.10E-124 | 2.3 | TNFSF11    | 5           |
| RP11-114G22.11 | 1.09E-126 | 0.5805929 | 0.152 | 0.018 | 2.62E-122 | 2.3 | RP11-114G  | 8.444444444 |
| GRIK41         | 2.21E-124 | 0.675472  | 0.129 | 0.013 | 5.33E-120 | 2.3 | GRIK4      | 9.923076923 |
| EZH21          | 4.24E-124 | 0.9619224 | 0.289 | 0.063 | 1.02E-119 | 2.3 | EZH2       | 4.587301587 |
| ASB31          | 9.99E-123 | 0.7040181 | 0.169 | 0.023 | 2.41E-118 | 2.3 | ASB3       | 7.347826087 |
| TRHDE1         | 1.06E-122 | 0.3812723 | 0.079 | 0.004 | 2.56E-118 | 2.3 | TRHDE      | 19.75       |
| ATF33          | 2.70E-122 | 1.34731   | 0.726 | 0.396 | 6.52E-118 | 2.3 | ATF3       | 1.833333333 |
| RP11-1017G21.4 | 5.46E-122 | 0.3776174 | 0.09  | 0.006 | 1.32E-117 | 2.3 | RP11-1017  | 15          |
| SLIT22         | 9.82E-120 | 0.9324601 | 0.208 | 0.035 | 2.37E-115 | 2.3 | SLIT2      | 5.942857143 |
| THBS11         | 1.42E-119 | 1.13382   | 0.303 | 0.072 | 3.42E-115 | 2.3 | THBS1      | 4.208333333 |
| ZSWIM62        | 1.43E-118 | 1.265175  | 0.784 | 0.489 | 3.45E-114 | 2.3 | ZSWIM6     | 1.603271984 |
| CCDC1411       | 3.60E-117 | 0.2770917 | 0.063 | 0.003 | 8.68E-113 | 2.3 | CCDC141    | 21          |
| NDUF11         | 8.83E-117 | 0.9306055 | 0.285 | 0.065 | 2.13E-112 | 2.3 | NDUF11     | 4.384615385 |
| COL21A11       | 1.63E-116 | 0.6947476 | 0.125 | 0.013 | 3.94E-112 | 2.3 | COL21A1    | 9.615384615 |
| CCDC1811       | 3.91E-116 | 0.5403041 | 0.125 | 0.013 | 9.42E-112 | 2.3 | CCDC181    | 9.615384615 |
| BTBD2          | 1.43E-115 | 0.6280558 | 0.135 | 0.015 | 3.44E-111 | 2.3 | BTBD2      | 9           |
| UGDH2          | 2.09E-115 | 1.189376  | 0.563 | 0.226 | 5.04E-111 | 2.3 | UGDH       | 2.491150442 |
| HEXIM2         | 1.10E-114 | 0.3341223 | 0.063 | 0.003 | 2.66E-110 | 2.3 | HEXIM2     | 21          |
| TPRG11         | 1.65E-113 | 1.37589   | 0.371 | 0.11  | 3.99E-109 | 2.3 | TPRG1      | 3.372727273 |
| EFCAB8         | 2.58E-113 | 0.3041055 | 0.069 | 0.003 | 6.21E-109 | 2.3 | EFCAB8     | 23          |
| SLC7A82        | 3.97E-113 | 0.7564425 | 0.213 | 0.038 | 9.58E-109 | 2.3 | SLC7A8     | 5.605263158 |

|                |           |           |       |       |           |     |            |             |
|----------------|-----------|-----------|-------|-------|-----------|-----|------------|-------------|
| TMEM247        | 5.39E-112 | 0.1669643 | 0.031 | 0     | 1.30E-107 | 2.3 | TMEM247    | #DIV/0!     |
| SLC39A62       | 1.51E-111 | 1.148642  | 0.633 | 0.292 | 3.65E-107 | 2.3 | SLC39A6    | 2.167808219 |
| TANGO6         | 4.06E-111 | 1.004493  | 0.27  | 0.06  | 9.80E-107 | 2.3 | TANGO6     | 4.5         |
| BICC11         | 1.60E-110 | 0.8689254 | 0.19  | 0.031 | 3.85E-106 | 2.3 | BICC1      | 6.129032258 |
| CTB-50L17.16   | 3.78E-110 | 0.9507231 | 0.103 | 0.009 | 9.12E-106 | 2.3 | CTB-50L17. | 11.44444444 |
| ASAH21         | 4.03E-110 | 0.2479237 | 0.066 | 0.003 | 9.73E-106 | 2.3 | ASAH2      | 22          |
| MYBPC12        | 5.30E-110 | 1.094077  | 0.563 | 0.222 | 1.28E-105 | 2.3 | MYBPC1     | 2.536036036 |
| KIAA1683       | 3.77E-109 | 0.6624966 | 0.164 | 0.024 | 9.10E-105 | 2.3 | KIAA1683   | 6.833333333 |
| CTD-2033A16.32 | 3.09E-108 | 0.5480585 | 0.152 | 0.021 | 7.44E-104 | 2.3 | CTD-2033A  | 7.238095238 |
| RP1-78O14.12   | 2.12E-107 | 1.063453  | 0.521 | 0.194 | 5.10E-103 | 2.3 | RP1-78O14  | 2.68556701  |
| NR4A12         | 5.14E-107 | 0.9494228 | 0.206 | 0.038 | 1.24E-102 | 2.3 | NR4A1      | 5.421052632 |
| HIPK4          | 1.55E-106 | 0.304971  | 0.067 | 0.004 | 3.73E-102 | 2.3 | HIPK4      | 16.75       |
| NFE2L32        | 1.16E-104 | 0.8878491 | 0.302 | 0.077 | 2.81E-100 | 2.3 | NFE2L3     | 3.922077922 |
| FAM46C1        | 9.83E-104 | 0.6611691 | 0.187 | 0.032 | 2.37E-99  | 2.3 | FAM46C     | 5.84375     |
| S100Z1         | 2.50E-101 | 0.3116735 | 0.067 | 0.004 | 6.03E-97  | 2.3 | S100Z      | 16.75       |
| FAM171B2       | 6.03E-101 | 0.6123161 | 0.187 | 0.032 | 1.45E-96  | 2.3 | FAM171B    | 5.84375     |
| ATP1B2         | 1.17E-100 | 0.2566972 | 0.056 | 0.003 | 2.82E-96  | 2.3 | ATP1B2     | 18.66666667 |
| RP11-973N13.3  | 1.30E-100 | 0.4191594 | 0.079 | 0.006 | 3.15E-96  | 2.3 | RP11-973N  | 13.16666667 |
| METTL12        | 1.84E-100 | 1.25439   | 0.101 | 0.01  | 4.44E-96  | 2.3 | METTL12    | 10.1        |
| TRIM591        | 2.06E-100 | 0.260365  | 0.063 | 0.003 | 4.96E-96  | 2.3 | TRIM59     | 21          |
| EGR12          | 5.93E-100 | 1.439778  | 0.275 | 0.069 | 1.43E-95  | 2.3 | EGR1       | 3.985507246 |
| KIF251         | 6.80E-100 | 0.3523767 | 0.076 | 0.005 | 1.64E-95  | 2.3 | KIF25      | 15.2        |
| TMBIM62        | 5.85E-99  | 0.8589779 | 0.942 | 0.858 | 1.41E-94  | 2.3 | TMBIM6     | 1.097902098 |
| NIM1K          | 3.31E-97  | 0.4475483 | 0.098 | 0.01  | 7.99E-93  | 2.3 | NIM1K      | 9.8         |
| GSTCD2         | 6.87E-97  | 1.102541  | 0.338 | 0.103 | 1.66E-92  | 2.3 | GSTCD      | 3.281553398 |
| WBSCR28        | 1.68E-94  | 0.107525  | 0.027 | 0     | 4.05E-90  | 2.3 | WBSCR28    | #DIV/0!     |
| SCUBE21        | 1.80E-93  | 0.7834986 | 0.24  | 0.055 | 4.34E-89  | 2.3 | SCUBE2     | 4.363636364 |
| RP11-644C3.11  | 6.75E-93  | 0.7517209 | 0.197 | 0.039 | 1.63E-88  | 2.3 | RP11-644C  | 5.051282051 |
| SLC10A11       | 3.92E-92  | 0.7067532 | 0.213 | 0.045 | 9.45E-88  | 2.3 | SLC10A1    | 4.733333333 |
| OPN51          | 4.01E-92  | 0.2245173 | 0.048 | 0.002 | 9.68E-88  | 2.3 | OPN5       | 24          |
| RP11-390E23.31 | 2.02E-90  | 0.4229887 | 0.096 | 0.01  | 4.88E-86  | 2.3 | RP11-390E: | 9.6         |
| TGFB1          | 3.41E-90  | 0.9263135 | 0.211 | 0.045 | 8.22E-86  | 2.3 | TGFB1      | 4.688888889 |
| HSPH12         | 1.48E-89  | 1.010321  | 0.58  | 0.276 | 3.57E-85  | 2.3 | HSPH1      | 2.101449275 |
| HPX2           | 2.88E-88  | 1.228066  | 0.501 | 0.206 | 6.94E-84  | 2.3 | HPX        | 2.432038835 |
| FAM184A        | 4.27E-88  | 0.6172885 | 0.162 | 0.028 | 1.03E-83  | 2.3 | FAM184A    | 5.785714286 |
| CPT1C          | 4.92E-88  | 0.2688173 | 0.053 | 0.003 | 1.19E-83  | 2.3 | CPT1C      | 17.66666667 |
| CHD41          | 2.56E-87  | 1.065291  | 0.36  | 0.124 | 6.16E-83  | 2.3 | CHD4       | 2.903225806 |
| ATP5E2         | 4.89E-87  | 1.10848   | 0.768 | 0.55  | 1.18E-82  | 2.3 | ATP5E      | 1.396363636 |
| ELAVL3         | 8.12E-87  | 0.194453  | 0.035 | 0.001 | 1.96E-82  | 2.3 | ELAVL3     | 35          |
| SFXN51         | 1.05E-86  | 0.5747554 | 0.149 | 0.024 | 2.53E-82  | 2.3 | SFXN5      | 6.208333333 |
| TRIM69         | 1.19E-84  | 0.5746611 | 0.16  | 0.029 | 2.87E-80  | 2.3 | TRIM69     | 5.517241379 |
| RP11-1100L3.7  | 2.91E-84  | 0.1928966 | 0.029 | 0.001 | 7.02E-80  | 2.3 | RP11-1100  | 29          |
| GALM           | 5.42E-84  | 0.9099846 | 0.291 | 0.085 | 1.31E-79  | 2.3 | GALM       | 3.423529412 |
| TMPRSS71       | 6.62E-84  | 0.2305314 | 0.06  | 0.004 | 1.60E-79  | 2.3 | TMPRSS7    | 15          |
| NUP210L1       | 2.73E-83  | 0.6367354 | 0.159 | 0.029 | 6.57E-79  | 2.3 | NUP210L    | 5.482758621 |
| FAM117A        | 1.49E-82  | 0.5355472 | 0.1   | 0.012 | 3.59E-78  | 2.3 | FAM117A    | 8.333333333 |
| IGFBP42        | 1.79E-82  | 0.9621188 | 0.375 | 0.133 | 4.32E-78  | 2.3 | IGFBP4     | 2.819548872 |
| RAI22          | 2.37E-82  | 0.5162107 | 0.136 | 0.021 | 5.71E-78  | 2.3 | RAI2       | 6.476190476 |
| GOLGA6D        | 6.97E-82  | 0.1647934 | 0.034 | 0.001 | 1.68E-77  | 2.3 | GOLGA6D    | 34          |
| CCDC190        | 1.32E-81  | 0.2018116 | 0.039 | 0.001 | 3.19E-77  | 2.3 | CCDC190    | 39          |
| NUSAP11        | 4.89E-81  | 0.7027675 | 0.204 | 0.046 | 1.18E-76  | 2.3 | NUSAP1     | 4.434782609 |
| TMEM223        | 5.78E-81  | 0.4014267 | 0.084 | 0.008 | 1.39E-76  | 2.3 | TMEM223    | 10.5        |

|                |          |           |       |       |          |     |               |             |
|----------------|----------|-----------|-------|-------|----------|-----|---------------|-------------|
| LINC00310      | 1.15E-80 | 0.5174958 | 0.135 | 0.021 | 2.77E-76 | 2.3 | LINC00310     | 6.428571429 |
| RP4-800F24.11  | 1.39E-80 | 0.4552406 | 0.121 | 0.017 | 3.36E-76 | 2.3 | RP4-800F24.11 | 7.117647059 |
| NQO12          | 3.13E-79 | 0.6835473 | 0.232 | 0.059 | 7.55E-75 | 2.3 | NQO1          | 3.93220339  |
| AC008592.4     | 3.98E-79 | 0.2853344 | 0.067 | 0.005 | 9.59E-75 | 2.3 | AC008592.4    | 13.4        |
| APELA2         | 7.84E-79 | 0.5787466 | 0.115 | 0.016 | 1.89E-74 | 2.3 | APELA         | 7.1875      |
| TAF4B2         | 9.33E-79 | 0.8082273 | 0.204 | 0.047 | 2.25E-74 | 2.3 | TAF4B         | 4.340425532 |
| DRAIC1         | 1.25E-78 | 0.3947398 | 0.101 | 0.013 | 3.01E-74 | 2.3 | DRAIC         | 7.769230769 |
| HEPACAM22      | 1.91E-78 | 0.6197399 | 0.183 | 0.038 | 4.60E-74 | 2.3 | HEPACAM22     | 4.815789474 |
| ID21           | 3.42E-78 | 1.030784  | 0.306 | 0.099 | 8.26E-74 | 2.3 | ID2           | 3.090909091 |
| SHBG           | 1.77E-77 | 0.40023   | 0.067 | 0.006 | 4.27E-73 | 2.3 | SHBG          | 11.16666667 |
| PKLR           | 3.72E-77 | 0.1465369 | 0.038 | 0.001 | 8.97E-73 | 2.3 | PKLR          | 38          |
| ITGAM          | 4.72E-77 | 0.383639  | 0.084 | 0.009 | 1.14E-72 | 2.3 | ITGAM         | 9.333333333 |
| ABHD6          | 6.80E-77 | 0.4158249 | 0.069 | 0.006 | 1.64E-72 | 2.3 | ABHD6         | 11.5        |
| RBBP61         | 7.34E-77 | 1.053409  | 0.539 | 0.273 | 1.77E-72 | 2.3 | RBBP6         | 1.974358974 |
| TMPRSS11E1     | 1.17E-76 | 0.6922195 | 0.208 | 0.049 | 2.83E-72 | 2.3 | TMPRSS11E1    | 4.244897959 |
| ATP5EP22       | 7.19E-75 | 1.051361  | 0.558 | 0.297 | 1.73E-70 | 2.3 | ATP5EP2       | 1.878787879 |
| LMCD12         | 9.78E-75 | 0.852829  | 0.315 | 0.102 | 2.36E-70 | 2.3 | LMCD1         | 3.088235294 |
| XBP11          | 1.72E-74 | 1.294038  | 0.622 | 0.384 | 4.15E-70 | 2.3 | XBP1          | 1.619791667 |
| RP11-605B16.1  | 3.85E-74 | 0.2198972 | 0.041 | 0.002 | 9.28E-70 | 2.3 | RP11-605B     | 20.5        |
| APLP22         | 7.49E-74 | 0.8679672 | 0.539 | 0.27  | 1.81E-69 | 2.3 | APLP2         | 1.996296296 |
| FBXL18         | 1.81E-73 | 0.611569  | 0.128 | 0.021 | 4.37E-69 | 2.3 | FBXL18        | 6.095238095 |
| AC124944.5     | 4.99E-73 | 0.1793097 | 0.032 | 0.001 | 1.20E-68 | 2.3 | AC124944.5    | 32          |
| RP11-517O13.11 | 2.25E-72 | 0.5164932 | 0.133 | 0.023 | 5.43E-68 | 2.3 | RP11-517O     | 5.782608696 |
| ITGA92         | 2.65E-72 | 0.4799836 | 0.143 | 0.026 | 6.39E-68 | 2.3 | ITGA9         | 5.5         |
| HES11          | 1.28E-71 | 1.507938  | 0.581 | 0.336 | 3.09E-67 | 2.3 | HES1          | 1.729166667 |
| RPL3L          | 2.45E-71 | 0.1897743 | 0.039 | 0.002 | 5.91E-67 | 2.3 | RPL3L         | 19.5        |
| GSTK12         | 3.29E-71 | 0.8992587 | 0.355 | 0.134 | 7.93E-67 | 2.3 | GSTK1         | 2.649253731 |
| OSBPL82        | 6.39E-71 | 1.004613  | 0.483 | 0.232 | 1.54E-66 | 2.3 | OSBPL8        | 2.081896552 |
| PNP1           | 7.89E-71 | 0.9149992 | 0.254 | 0.076 | 1.90E-66 | 2.3 | PNP           | 3.342105263 |
| CREBZF1        | 2.71E-70 | 0.76796   | 0.229 | 0.063 | 6.53E-66 | 2.3 | CREBZF        | 3.634920635 |
| CATSPERG       | 8.11E-70 | 0.4061031 | 0.098 | 0.013 | 1.96E-65 | 2.3 | CATSPERG      | 7.538461538 |
| BRD21          | 1.99E-69 | 1.022857  | 0.508 | 0.262 | 4.80E-65 | 2.3 | BRD2          | 1.938931298 |
| CCNG22         | 5.67E-69 | 1.013671  | 0.449 | 0.205 | 1.37E-64 | 2.3 | CCNG2         | 2.190243902 |
| UBL52          | 8.06E-69 | 0.9827332 | 0.711 | 0.503 | 1.94E-64 | 2.3 | UBL5          | 1.413518887 |
| COX7C3         | 8.99E-69 | 0.7339878 | 0.917 | 0.872 | 2.17E-64 | 2.3 | COX7C         | 1.051605505 |
| LDHC1          | 3.47E-68 | 0.4970999 | 0.122 | 0.021 | 8.36E-64 | 2.3 | LDHC          | 5.80952381  |
| SCP22          | 8.92E-68 | 0.9656556 | 0.565 | 0.317 | 2.15E-63 | 2.3 | SCP2          | 1.782334385 |
| PLEKHG21       | 1.02E-67 | 0.4384339 | 0.104 | 0.015 | 2.47E-63 | 2.3 | PLEKHG2       | 6.933333333 |
| CTD-2277K2.1   | 1.19E-67 | 0.3570295 | 0.067 | 0.006 | 2.86E-63 | 2.3 | CTD-2277K     | 11.16666667 |
| SC5D2          | 3.52E-67 | 0.9391932 | 0.41  | 0.177 | 8.49E-63 | 2.3 | SC5D          | 2.316384181 |
| MYL12B2        | 4.28E-67 | 0.7131043 | 0.934 | 0.817 | 1.03E-62 | 2.3 | MYL12B        | 1.143206854 |
| PRDX32         | 4.63E-67 | 0.8193598 | 0.466 | 0.218 | 1.12E-62 | 2.3 | PRDX3         | 2.137614679 |
| RP11-809N8.4   | 6.23E-67 | 0.2010845 | 0.041 | 0.002 | 1.50E-62 | 2.3 | RP11-809N     | 20.5        |
| AC098617.11    | 8.52E-67 | 0.1584334 | 0.041 | 0.002 | 2.06E-62 | 2.3 | AC098617.11   | 20.5        |
| RP11-381K20.2  | 4.79E-66 | 0.3324694 | 0.08  | 0.009 | 1.15E-61 | 2.3 | RP11-381K     | 8.888888889 |
| BNIP3L1        | 5.28E-66 | 0.9309358 | 0.652 | 0.413 | 1.27E-61 | 2.3 | BNIP3L        | 1.578692494 |
| SPATA16        | 5.52E-66 | 0.2407131 | 0.045 | 0.003 | 1.33E-61 | 2.3 | SPATA16       | 15          |
| BTK            | 9.23E-66 | 0.1833893 | 0.037 | 0.002 | 2.22E-61 | 2.3 | BTK           | 18.5        |
| HMMR1          | 1.06E-65 | 0.2806872 | 0.065 | 0.006 | 2.55E-61 | 2.3 | HMMR          | 10.83333333 |
| APOL41         | 1.58E-65 | 0.3913255 | 0.094 | 0.013 | 3.80E-61 | 2.3 | APOL4         | 7.230769231 |
| RP1-167G20.11  | 4.02E-65 | 0.2797911 | 0.058 | 0.005 | 9.69E-61 | 2.3 | RP1-167G2     | 11.6        |
| PPP3CA2        | 4.19E-65 | 0.8676393 | 0.775 | 0.558 | 1.01E-60 | 2.3 | PPP3CA        | 1.388888889 |

|                |          |           |       |       |          |     |            |             |
|----------------|----------|-----------|-------|-------|----------|-----|------------|-------------|
| EFHD12         | 5.48E-65 | 0.9136214 | 0.558 | 0.293 | 1.32E-60 | 2.3 | EFHD1      | 1.90443686  |
| GDF91          | 6.74E-65 | 0.1671352 | 0.045 | 0.003 | 1.62E-60 | 2.3 | GDF9       | 15          |
| KCNMB41        | 5.66E-64 | 0.3435689 | 0.096 | 0.014 | 1.37E-59 | 2.3 | KCNMB4     | 6.857142857 |
| FGF181         | 6.10E-64 | 0.2576437 | 0.056 | 0.005 | 1.47E-59 | 2.3 | FGF18      | 11.2        |
| NDUFB12        | 1.21E-63 | 1.043712  | 0.573 | 0.352 | 2.91E-59 | 2.3 | NDUFB1     | 1.627840909 |
| TULP21         | 1.53E-63 | 0.5753738 | 0.147 | 0.031 | 3.69E-59 | 2.3 | TULP2      | 4.741935484 |
| UBE2S          | 1.93E-63 | 0.3823778 | 0.086 | 0.011 | 4.65E-59 | 2.3 | UBE2S      | 7.818181818 |
| BMP8A1         | 2.55E-63 | 0.2155408 | 0.055 | 0.004 | 6.15E-59 | 2.3 | BMP8A      | 13.75       |
| LSAMP2         | 3.11E-63 | 0.7891867 | 0.726 | 0.464 | 7.51E-59 | 2.3 | LSAMP      | 1.564655172 |
| TSPAN11        | 4.12E-63 | 0.8824666 | 0.468 | 0.22  | 9.93E-59 | 2.3 | TSPAN1     | 2.127272727 |
| DIO2-AS12      | 5.19E-63 | 0.822354  | 0.251 | 0.078 | 1.25E-58 | 2.3 | DIO2-AS1   | 3.217948718 |
| REEP52         | 9.36E-63 | 0.8642547 | 0.486 | 0.246 | 2.26E-58 | 2.3 | REEP5      | 1.975609756 |
| DHDH           | 9.31E-62 | 0.1684186 | 0.041 | 0.002 | 2.25E-57 | 2.3 | DHDH       | 20.5        |
| TEX351         | 1.43E-61 | 0.1442565 | 0.031 | 0.001 | 3.46E-57 | 2.3 | TEX35      | 31          |
| NEB1           | 2.04E-61 | 0.6118732 | 0.174 | 0.043 | 4.92E-57 | 2.3 | NEB        | 4.046511628 |
| RP11-93I21.31  | 3.26E-61 | 0.3596015 | 0.087 | 0.012 | 7.87E-57 | 2.3 | RP11-93I21 | 7.25        |
| ASIP           | 3.77E-61 | 0.2567162 | 0.056 | 0.005 | 9.09E-57 | 2.3 | ASIP       | 11.2        |
| F32            | 7.49E-61 | 0.872471  | 0.295 | 0.106 | 1.81E-56 | 2.3 | F3         | 2.783018868 |
| MYLIP1         | 1.03E-60 | 0.7630529 | 0.263 | 0.087 | 2.49E-56 | 2.3 | MYLIP      | 3.022988506 |
| CNNM4          | 1.08E-60 | 0.7589809 | 0.225 | 0.067 | 2.61E-56 | 2.3 | CNNM4      | 3.358208955 |
| ZFP36L23       | 1.64E-60 | 1.16226   | 0.604 | 0.365 | 3.96E-56 | 2.3 | ZFP36L2    | 1.654794521 |
| ANKRD42        | 1.18E-59 | 0.5358504 | 0.173 | 0.043 | 2.84E-55 | 2.3 | ANKRD42    | 4.023255814 |
| FAM222A1       | 1.20E-59 | 0.5331064 | 0.166 | 0.04  | 2.89E-55 | 2.3 | FAM222A    | 4.15        |
| DLG23          | 1.64E-59 | 1.017241  | 0.365 | 0.158 | 3.94E-55 | 2.3 | DLG2       | 2.310126582 |
| RP5-1185I7.1   | 3.55E-59 | 0.1010085 | 0.028 | 0.001 | 8.55E-55 | 2.3 | RP5-1185I7 | 28          |
| CFAP701        | 4.04E-59 | 0.6716098 | 0.162 | 0.038 | 9.75E-55 | 2.3 | CFAP70     | 4.263157895 |
| RP4-665J23.1   | 4.98E-59 | 0.1597172 | 0.034 | 0.002 | 1.20E-54 | 2.3 | RP4-665J23 | 17          |
| BMPR1B-AS11    | 1.10E-58 | 0.2572712 | 0.055 | 0.005 | 2.66E-54 | 2.3 | BMPR1B-A   | 11          |
| PCDH17         | 1.29E-58 | 0.1308951 | 0.024 | 0.001 | 3.11E-54 | 2.3 | PCDH17     | 24          |
| RHOB1          | 3.71E-58 | 0.9823923 | 0.289 | 0.106 | 8.95E-54 | 2.3 | RHOB       | 2.726415094 |
| MSRB31         | 3.88E-58 | 0.408123  | 0.1   | 0.016 | 9.36E-54 | 2.3 | MSRB3      | 6.25        |
| SLC24A11       | 4.36E-58 | 0.4019894 | 0.101 | 0.017 | 1.05E-53 | 2.3 | SLC24A1    | 5.941176471 |
| CTA-392E5.12   | 1.24E-56 | 0.6963881 | 0.138 | 0.03  | 2.98E-52 | 2.3 | CTA-392E5  | 4.6         |
| CPEB22         | 4.85E-56 | 0.6935611 | 0.573 | 0.302 | 1.17E-51 | 2.3 | CPEB2      | 1.897350993 |
| RP11-432B6.3   | 5.75E-56 | 0.2239818 | 0.056 | 0.005 | 1.39E-51 | 2.3 | RP11-432B  | 11.2        |
| C14orf22       | 1.09E-55 | 0.8194254 | 0.81  | 0.705 | 2.63E-51 | 2.3 | C14orf2    | 1.14893617  |
| SLC38A21       | 1.36E-55 | 0.9456842 | 0.617 | 0.375 | 3.28E-51 | 2.3 | SLC38A2    | 1.645333333 |
| TXN4           | 1.92E-55 | 0.8318881 | 0.801 | 0.672 | 4.64E-51 | 2.3 | TXN        | 1.191964286 |
| RP11-727A23.10 | 2.17E-55 | 0.5200391 | 0.101 | 0.017 | 5.22E-51 | 2.3 | RP11-727A  | 5.941176471 |
| CENPL          | 3.24E-55 | 0.3595124 | 0.1   | 0.017 | 7.81E-51 | 2.3 | CENPL      | 5.882352941 |
| DYSF1          | 4.84E-55 | 0.2610415 | 0.063 | 0.007 | 1.17E-50 | 2.3 | DYSF       | 9           |
| NDUFA43        | 7.81E-55 | 0.7485499 | 0.834 | 0.747 | 1.88E-50 | 2.3 | NDUFA4     | 1.116465863 |
| SNX141         | 9.16E-55 | 0.7512843 | 0.294 | 0.113 | 2.21E-50 | 2.3 | SNX14      | 2.601769912 |
| Jun-01         | 1.09E-54 | 1.059256  | 0.444 | 0.23  | 2.62E-50 | 2.3 | JUN        | 1.930434783 |
| PRCP2          | 1.40E-54 | 0.5564958 | 0.173 | 0.046 | 3.38E-50 | 2.3 | PRCP       | 3.760869565 |
| SIRT11         | 1.41E-54 | 0.6908733 | 0.274 | 0.098 | 3.41E-50 | 2.3 | SIRT1      | 2.795918367 |
| KMT2E2         | 3.67E-54 | 0.9599966 | 0.646 | 0.461 | 8.85E-50 | 2.3 | KMT2E      | 1.401301518 |
| HORMAD2        | 5.22E-54 | 0.2652122 | 0.067 | 0.008 | 1.26E-49 | 2.3 | HORMAD2    | 8.375       |
| RP11-588H23.3  | 6.34E-54 | 0.1354132 | 0.032 | 0.002 | 1.53E-49 | 2.3 | RP11-588H  | 16          |
| ADAM321        | 1.09E-53 | 0.9551901 | 0.444 | 0.224 | 2.63E-49 | 2.3 | ADAM32     | 1.982142857 |
| RP11-455F5.3   | 1.45E-53 | 0.1505874 | 0.031 | 0.001 | 3.50E-49 | 2.3 | RP11-455F5 | 31          |
| PEAK12         | 3.45E-53 | 1.124885  | 0.482 | 0.261 | 8.33E-49 | 2.3 | PEAK1      | 1.846743295 |

|               |          |           |       |       |          |     |            |             |
|---------------|----------|-----------|-------|-------|----------|-----|------------|-------------|
| FAM105A2      | 4.55E-53 | 0.4310681 | 0.117 | 0.023 | 1.10E-48 | 2.3 | FAM105A    | 5.086956522 |
| PPP1R13B1     | 6.75E-53 | 0.8901293 | 0.395 | 0.186 | 1.63E-48 | 2.3 | PPP1R13B   | 2.123655914 |
| UBB3          | 7.59E-53 | 0.9944271 | 0.815 | 0.719 | 1.83E-48 | 2.3 | UBB        | 1.133518776 |
| ERBB42        | 8.82E-53 | 0.6604628 | 0.765 | 0.485 | 2.13E-48 | 2.3 | ERBB4      | 1.577319588 |
| UQCRB3        | 9.17E-53 | 0.7438607 | 0.865 | 0.804 | 2.21E-48 | 2.3 | UQCRB      | 1.075870647 |
| BASP11        | 3.26E-52 | 0.570506  | 0.178 | 0.049 | 7.86E-48 | 2.3 | BASP1      | 3.632653061 |
| RP11-324D17.1 | 9.00E-52 | 0.1225872 | 0.028 | 0.001 | 2.17E-47 | 2.3 | RP11-324D  | 28          |
| RP11-429J17.7 | 9.25E-52 | 0.1374517 | 0.027 | 0.001 | 2.23E-47 | 2.3 | RP11-429J1 | 27          |
| WLS2          | 2.01E-51 | 0.7744056 | 0.372 | 0.17  | 4.84E-47 | 2.3 | WLS        | 2.188235294 |
| POLG21        | 2.21E-51 | 0.6610124 | 0.233 | 0.079 | 5.33E-47 | 2.3 | POLG2      | 2.949367089 |
| GNAS2         | 2.82E-51 | 0.6414777 | 0.858 | 0.75  | 6.80E-47 | 2.3 | GNAS       | 1.144       |
| TMPRSS12      | 2.83E-51 | 0.2607166 | 0.069 | 0.009 | 6.82E-47 | 2.3 | TMPRSS12   | 7.666666667 |
| ACTG11        | 3.48E-51 | 1.00293   | 0.855 | 0.721 | 8.38E-47 | 2.3 | ACTG1      | 1.185852982 |
| AMD12         | 5.85E-51 | 0.8611865 | 0.462 | 0.246 | 1.41E-46 | 2.3 | AMD1       | 1.87804878  |
| WWP2          | 7.64E-51 | 0.7794651 | 0.205 | 0.065 | 1.84E-46 | 2.3 | WWP2       | 3.153846154 |
| LINC01033     | 1.57E-50 | 0.3441012 | 0.066 | 0.008 | 3.79E-46 | 2.3 | LINC01033  | 8.25        |
| EIF5          | 2.07E-50 | 0.9100624 | 0.427 | 0.222 | 5.00E-46 | 2.3 | EIF5       | 1.923423423 |
| DDX3X         | 3.49E-50 | 0.8424186 | 0.566 | 0.358 | 8.41E-46 | 2.3 | DDX3X      | 1.581005587 |
| NPHS1         | 4.42E-50 | 0.2583131 | 0.067 | 0.009 | 1.07E-45 | 2.3 | NPHS1      | 7.444444444 |
| CCNE1         | 6.59E-50 | 0.2290601 | 0.041 | 0.003 | 1.59E-45 | 2.3 | CCNE1      | 13.66666667 |
| AC007879.1    | 7.19E-50 | 0.402097  | 0.087 | 0.014 | 1.73E-45 | 2.3 | AC007879.  | 6.214285714 |
| NDUFA13       | 1.76E-49 | 0.7412618 | 0.739 | 0.603 | 4.25E-45 | 2.3 | NDUFA1     | 1.225538972 |
| MEPE2         | 2.71E-49 | 0.3399525 | 0.08  | 0.012 | 6.53E-45 | 2.3 | MEPE       | 6.666666667 |
| RP11-396C23.2 | 3.51E-49 | 0.1632833 | 0.041 | 0.003 | 8.46E-45 | 2.3 | RP11-396C  | 13.66666667 |
| JUND2         | 4.21E-49 | 0.7635926 | 0.367 | 0.169 | 1.01E-44 | 2.3 | JUND       | 2.171597633 |
| MAGI32        | 6.70E-49 | 0.8411513 | 0.593 | 0.378 | 1.62E-44 | 2.3 | MAGI3      | 1.568783069 |
| C6orf62       | 6.78E-49 | 0.8050146 | 0.4   | 0.203 | 1.63E-44 | 2.3 | C6orf62    | 1.97044335  |
| PYGM1         | 9.61E-49 | 0.1675257 | 0.035 | 0.002 | 2.32E-44 | 2.3 | PYGM       | 17.5        |
| RP11-178C3.1  | 1.66E-48 | 0.2882928 | 0.076 | 0.011 | 4.00E-44 | 2.3 | RP11-178C  | 6.909090909 |
| IER31         | 1.74E-48 | 1.021517  | 0.531 | 0.313 | 4.19E-44 | 2.3 | IER3       | 1.696485623 |
| HCLS11        | 4.81E-48 | 0.1646315 | 0.039 | 0.003 | 1.16E-43 | 2.3 | HCLS1      | 13          |
| RND11         | 4.92E-48 | 0.736098  | 0.229 | 0.079 | 1.19E-43 | 2.3 | RND1       | 2.898734177 |
| RP11-321N4.5  | 7.67E-48 | 0.2840419 | 0.072 | 0.01  | 1.85E-43 | 2.3 | RP11-321N  | 7.2         |
| ATP5J2        | 2.25E-47 | 0.7724368 | 0.673 | 0.494 | 5.42E-43 | 2.3 | ATP5J      | 1.362348178 |
| LINC015881    | 2.92E-47 | 0.770668  | 0.257 | 0.097 | 7.05E-43 | 2.3 | LINC01588  | 2.649484536 |
| COX6B12       | 6.10E-47 | 0.673875  | 0.829 | 0.759 | 1.47E-42 | 2.3 | COX6B1     | 1.092226614 |
| NELFB         | 6.61E-47 | 0.309657  | 0.072 | 0.011 | 1.59E-42 | 2.3 | NELFB      | 6.545454545 |
| LPAR32        | 1.35E-46 | 0.5317861 | 0.146 | 0.038 | 3.26E-42 | 2.3 | LPAR3      | 3.842105263 |
| CD4           | 1.92E-46 | 0.2190771 | 0.048 | 0.005 | 4.63E-42 | 2.3 | CD4        | 9.6         |
| GSPT12        | 2.02E-46 | 0.734867  | 0.572 | 0.363 | 4.88E-42 | 2.3 | GSPT1      | 1.575757576 |
| UQCR101       | 3.70E-46 | 0.8090582 | 0.667 | 0.504 | 8.93E-42 | 2.3 | UQCR10     | 1.323412698 |
| PGR2          | 4.93E-46 | 0.6102015 | 0.226 | 0.078 | 1.19E-41 | 2.3 | PGR        | 2.897435897 |
| ATP5I2        | 5.34E-46 | 0.7443581 | 0.316 | 0.139 | 1.29E-41 | 2.3 | ATP5I      | 2.273381295 |
| SRP142        | 5.85E-46 | 0.5057089 | 0.933 | 0.872 | 1.41E-41 | 2.3 | SRP14      | 1.069954128 |
| ARMC4         | 1.02E-45 | 0.2452231 | 0.046 | 0.005 | 2.45E-41 | 2.3 | ARMC4      | 9.2         |
| VCL4          | 2.30E-45 | 0.8260529 | 0.508 | 0.305 | 5.54E-41 | 2.3 | VCL        | 1.66557377  |
| C6orf991      | 2.93E-45 | 0.2824331 | 0.066 | 0.009 | 7.06E-41 | 2.3 | C6orf99    | 7.333333333 |
| IDI11         | 3.91E-45 | 0.8690019 | 0.41  | 0.216 | 9.44E-41 | 2.3 | IDI1       | 1.898148148 |
| TSC22D23      | 6.96E-45 | 0.5966276 | 0.687 | 0.461 | 1.68E-40 | 2.3 | TSC22D2    | 1.490238612 |
| RND32         | 1.41E-44 | 0.7762252 | 0.549 | 0.345 | 3.39E-40 | 2.3 | RND3       | 1.591304348 |
| DDR23         | 1.56E-44 | 0.6731367 | 0.216 | 0.076 | 3.77E-40 | 2.3 | DDR2       | 2.842105263 |
| TMSB4X        | 2.14E-44 | 0.3812511 | 0.994 | 0.935 | 5.15E-40 | 2.3 | TMSB4X     | 1.063101604 |

|                |          |           |       |       |          |     |                |              |
|----------------|----------|-----------|-------|-------|----------|-----|----------------|--------------|
| PRPS2          | 3.38E-44 | 0.5594161 | 0.219 | 0.077 | 8.15E-40 | 2.3 | PRPS2          | 2.844155844  |
| FAM222A-AS12   | 3.45E-44 | 0.4293838 | 0.121 | 0.028 | 8.32E-40 | 2.3 | FAM222A-AS12   | 4.321428571  |
| LINC01504      | 4.16E-44 | 0.1953979 | 0.042 | 0.004 | 1.00E-39 | 2.3 | LINC01504      | 10.5         |
| GALNT6         | 6.10E-44 | 0.5814835 | 0.187 | 0.06  | 1.47E-39 | 2.3 | GALNT6         | 3.116666667  |
| DARS2          | 7.28E-44 | 0.5470721 | 0.206 | 0.07  | 1.76E-39 | 2.3 | DARS2          | 2.942857143  |
| APC21          | 1.11E-43 | 0.1284952 | 0.032 | 0.002 | 2.68E-39 | 2.3 | APC2           | 16           |
| NEDD4L3        | 1.23E-43 | 0.6775326 | 0.757 | 0.594 | 2.97E-39 | 2.3 | NEDD4L         | 1.274410774  |
| C9orf1521      | 1.61E-43 | 0.4946974 | 0.156 | 0.044 | 3.88E-39 | 2.3 | C9orf152       | 3.545454545  |
| ABHD5          | 1.63E-43 | 0.7460584 | 0.402 | 0.209 | 3.93E-39 | 2.3 | ABHD5          | 1.9234444976 |
| RP11-173M1.4   | 1.69E-43 | 0.116377  | 0.024 | 0.001 | 4.09E-39 | 2.3 | RP11-173M1.4   | 24           |
| P4HA32         | 2.66E-43 | 0.3924165 | 0.129 | 0.032 | 6.42E-39 | 2.3 | P4HA3          | 4.03125      |
| CDKL21         | 3.69E-43 | 0.3395343 | 0.084 | 0.015 | 8.89E-39 | 2.3 | CDKL2          | 5.6          |
| SEC623         | 1.00E-42 | 0.7903397 | 0.706 | 0.574 | 2.42E-38 | 2.3 | SEC62          | 1.229965157  |
| CAPRIN2        | 1.14E-42 | 0.2609447 | 0.058 | 0.008 | 2.74E-38 | 2.3 | CAPRIN2        | 7.25         |
| POU2F2         | 1.28E-42 | 0.4088588 | 0.08  | 0.014 | 3.08E-38 | 2.3 | POU2F2         | 5.714285714  |
| DNAJC3-AS12    | 1.89E-42 | 0.3325145 | 0.083 | 0.015 | 4.57E-38 | 2.3 | DNAJC3-AS12    | 5.533333333  |
| ADAMTS122      | 3.00E-42 | 0.2657815 | 0.048 | 0.005 | 7.24E-38 | 2.3 | ADAMTS12       | 9.6          |
| HIST1H2BD2     | 3.39E-42 | 0.9968888 | 0.489 | 0.295 | 8.18E-38 | 2.3 | HIST1H2BD2     | 1.657627119  |
| TFRC           | 3.62E-42 | 0.550643  | 0.159 | 0.047 | 8.74E-38 | 2.3 | TFRC           | 3.382978723  |
| DOCK112        | 3.65E-42 | 0.3940331 | 0.108 | 0.024 | 8.81E-38 | 2.3 | DOCK11         | 4.5          |
| AC073333.8     | 4.74E-42 | 0.2977693 | 0.073 | 0.012 | 1.14E-37 | 2.3 | AC073333.8     | 6.083333333  |
| RP11-440G9.1   | 5.13E-42 | 0.1504229 | 0.022 | 0.001 | 1.24E-37 | 2.3 | RP11-440G9.1   | 22           |
| NME51          | 6.57E-42 | 0.4142018 | 0.107 | 0.024 | 1.58E-37 | 2.3 | NME5           | 4.458333333  |
| TMA72          | 7.08E-42 | 0.7278113 | 0.722 | 0.599 | 1.71E-37 | 2.3 | TMA7           | 1.205342237  |
| EFNB22         | 9.03E-42 | 0.660633  | 0.25  | 0.1   | 2.18E-37 | 2.3 | EFNB2          | 2.5          |
| MILR11         | 9.37E-42 | 0.2160696 | 0.039 | 0.004 | 2.26E-37 | 2.3 | MILR1          | 9.75         |
| IL1RN2         | 1.18E-41 | 0.5707909 | 0.16  | 0.048 | 2.85E-37 | 2.3 | IL1RN          | 3.333333333  |
| CPE2           | 1.58E-41 | 0.7580653 | 0.396 | 0.199 | 3.81E-37 | 2.3 | CPE            | 1.989949749  |
| CD632          | 1.80E-41 | 0.754658  | 0.577 | 0.377 | 4.35E-37 | 2.3 | CD63           | 1.530503979  |
| AP000318.2     | 1.85E-41 | 0.3562465 | 0.098 | 0.021 | 4.46E-37 | 2.3 | AP000318.2     | 4.666666667  |
| AC018890.62    | 1.92E-41 | 0.7739898 | 0.426 | 0.234 | 4.63E-37 | 2.3 | AC018890.62    | 1.820512821  |
| ABHD101        | 2.89E-41 | 0.2755297 | 0.076 | 0.013 | 6.98E-37 | 2.3 | ABHD10         | 5.846153846  |
| SPDYA1         | 2.99E-41 | 0.618326  | 0.251 | 0.099 | 7.22E-37 | 2.3 | SPDYA          | 2.535353535  |
| KIF17          | 3.77E-41 | 0.1594179 | 0.039 | 0.004 | 9.08E-37 | 2.3 | KIF17          | 9.75         |
| EPAS1          | 4.63E-41 | 0.656947  | 0.319 | 0.147 | 1.12E-36 | 2.3 | EPAS1          | 2.170068027  |
| AC004257.1     | 5.74E-41 | 0.1284222 | 0.035 | 0.003 | 1.38E-36 | 2.3 | AC004257.1     | 11.66666667  |
| ANXA24         | 8.73E-41 | 0.4829203 | 0.971 | 0.925 | 2.10E-36 | 2.3 | ANXA2          | 1.04972973   |
| HIP12          | 9.72E-41 | 0.7412861 | 0.229 | 0.088 | 2.34E-36 | 2.3 | HIP1           | 2.602272727  |
| SLC27A42       | 1.07E-40 | 0.5589047 | 0.857 | 0.699 | 2.57E-36 | 2.3 | SLC27A4        | 1.226037196  |
| DBI4           | 1.86E-40 | 0.6694378 | 0.792 | 0.65  | 4.49E-36 | 2.3 | DBI            | 1.218461538  |
| CD1642         | 2.33E-40 | 0.763941  | 0.463 | 0.278 | 5.62E-36 | 2.3 | CD164          | 1.665467626  |
| MPHOSPH61      | 2.33E-40 | 0.7714149 | 0.281 | 0.124 | 5.63E-36 | 2.3 | MPHOSPH61      | 2.266129032  |
| UNQ6494        | 6.45E-40 | 0.1262718 | 0.024 | 0.001 | 1.56E-35 | 2.3 | UNQ6494        | 24           |
| RASL11B1       | 1.15E-39 | 0.1682543 | 0.039 | 0.004 | 2.76E-35 | 2.3 | RASL11B        | 9.75         |
| ARID5B2        | 2.64E-39 | 0.8408644 | 0.853 | 0.73  | 6.38E-35 | 2.3 | ARID5B         | 1.168493151  |
| PRKCG          | 7.40E-39 | 0.3208037 | 0.07  | 0.012 | 1.78E-34 | 2.3 | PRKCG          | 5.833333333  |
| GCM12          | 7.82E-39 | 0.2653968 | 0.049 | 0.006 | 1.89E-34 | 2.3 | GCM1           | 8.166666667  |
| ACVR1C1        | 7.95E-39 | 0.3701934 | 0.103 | 0.024 | 1.92E-34 | 2.3 | ACVR1C         | 4.291666667  |
| RP11-221J22.11 | 9.22E-39 | 0.1947122 | 0.045 | 0.005 | 2.22E-34 | 2.3 | RP11-221J22.11 | 9            |
| UQCRQ2         | 1.48E-38 | 0.6255795 | 0.261 | 0.111 | 3.56E-34 | 2.3 | UQCRQ          | 2.351351351  |
| PYY            | 1.57E-38 | 0.3522458 | 0.044 | 0.005 | 3.78E-34 | 2.3 | PYY            | 8.8          |
| PRLR2          | 4.07E-38 | 0.736428  | 0.419 | 0.232 | 9.82E-34 | 2.3 | PRLR           | 1.806034483  |

|                |          |           |       |       |          |     |            |             |
|----------------|----------|-----------|-------|-------|----------|-----|------------|-------------|
| AP3B2          | 4.15E-38 | 0.3325232 | 0.055 | 0.008 | 1.00E-33 | 2.3 | AP3B2      | 6.875       |
| USMG52         | 5.48E-38 | 0.6378486 | 0.749 | 0.626 | 1.32E-33 | 2.3 | USMG5      | 1.196485623 |
| SKIDA11        | 5.65E-38 | 0.1275316 | 0.021 | 0.001 | 1.36E-33 | 2.3 | SKIDA1     | 21          |
| CDKN2A         | 8.85E-38 | 0.1395788 | 0.028 | 0.002 | 2.13E-33 | 2.3 | CDKN2A     | 14          |
| RP11-718O11.1  | 1.06E-37 | 0.3155545 | 0.076 | 0.014 | 2.56E-33 | 2.3 | RP11-718O  | 5.428571429 |
| PHTF22         | 1.19E-37 | 0.5331811 | 0.213 | 0.081 | 2.86E-33 | 2.3 | PHTF2      | 2.62962963  |
| FAM179A1       | 1.44E-37 | 0.1982052 | 0.035 | 0.003 | 3.47E-33 | 2.3 | FAM179A    | 11.66666667 |
| HSPB81         | 1.69E-37 | 0.4959921 | 0.199 | 0.072 | 4.08E-33 | 2.3 | HSPB8      | 2.763888889 |
| AC002463.3     | 1.93E-37 | 0.2431822 | 0.039 | 0.004 | 4.66E-33 | 2.3 | AC002463.  | 9.75        |
| RP11-26J3.1    | 1.94E-37 | 0.2676065 | 0.042 | 0.005 | 4.68E-33 | 2.3 | RP11-26J3. | 8.4         |
| KCNK61         | 3.15E-37 | 0.4891177 | 0.142 | 0.042 | 7.59E-33 | 2.3 | KCNK6      | 3.380952381 |
| PANK32         | 3.16E-37 | 0.7208788 | 0.34  | 0.174 | 7.62E-33 | 2.3 | PANK3      | 1.954022989 |
| NDUFB32        | 4.03E-37 | 0.7343645 | 0.376 | 0.211 | 9.73E-33 | 2.3 | NDUFB3     | 1.781990521 |
| REC1141        | 5.08E-37 | 0.2466805 | 0.063 | 0.01  | 1.22E-32 | 2.3 | REC114     | 6.3         |
| EML61          | 6.64E-37 | 0.3708416 | 0.115 | 0.03  | 1.60E-32 | 2.3 | EML6       | 3.833333333 |
| RP11-517O13.31 | 8.68E-37 | 0.343891  | 0.081 | 0.016 | 2.09E-32 | 2.3 | RP11-517O  | 5.0625      |
| COX7B3         | 1.02E-36 | 0.6296462 | 0.749 | 0.63  | 2.47E-32 | 2.3 | COX7B      | 1.188888889 |
| ANKFY11        | 1.09E-36 | 0.5728657 | 0.204 | 0.077 | 2.64E-32 | 2.3 | ANKFY1     | 2.649350649 |
| PCAT292        | 1.18E-36 | 0.1824112 | 0.038 | 0.004 | 2.86E-32 | 2.3 | PCAT29     | 9.5         |
| FBP12          | 1.23E-36 | 0.3698531 | 0.125 | 0.034 | 2.98E-32 | 2.3 | FBP1       | 3.676470588 |
| KIAA13242      | 1.58E-36 | 0.6436288 | 0.406 | 0.223 | 3.81E-32 | 2.3 | KIAA1324   | 1.820627803 |
| NXF1           | 1.67E-36 | 0.5931971 | 0.218 | 0.086 | 4.03E-32 | 2.3 | NXF1       | 2.534883721 |
| ADGRF41        | 2.18E-36 | 0.1295257 | 0.032 | 0.003 | 5.26E-32 | 2.3 | ADGRF4     | 10.66666667 |
| AP000695.61    | 2.27E-36 | 0.2280916 | 0.052 | 0.007 | 5.48E-32 | 2.3 | AP000695.  | 7.428571429 |
| RP11-48B3.41   | 2.31E-36 | 0.3125815 | 0.077 | 0.015 | 5.56E-32 | 2.3 | RP11-48B3  | 5.133333333 |
| AC106900.61    | 2.72E-36 | 0.2504982 | 0.067 | 0.012 | 6.56E-32 | 2.3 | AC106900.  | 5.583333333 |
| SYTL31         | 4.53E-36 | 0.5592276 | 0.169 | 0.057 | 1.09E-31 | 2.3 | SYTL3      | 2.964912281 |
| IGF2BP31       | 5.27E-36 | 0.3973904 | 0.111 | 0.028 | 1.27E-31 | 2.3 | IGF2BP3    | 3.964285714 |
| HMG52          | 5.44E-36 | 0.5606612 | 0.183 | 0.064 | 1.31E-31 | 2.3 | HMG5       | 2.859375    |
| DLL4           | 6.21E-36 | 0.1682015 | 0.037 | 0.004 | 1.50E-31 | 2.3 | DLL4       | 9.25        |
| TLL21          | 6.57E-36 | 0.2635747 | 0.077 | 0.015 | 1.59E-31 | 2.3 | TLL2       | 5.133333333 |
| CTD-2540M10.1  | 6.99E-36 | 0.1143172 | 0.025 | 0.002 | 1.69E-31 | 2.3 | CTD-2540M  | 12.5        |
| NDUFA51        | 7.81E-36 | 0.7114211 | 0.476 | 0.306 | 1.88E-31 | 2.3 | NDUFA5     | 1.555555556 |
| TMEM150B       | 8.00E-36 | 0.2000985 | 0.041 | 0.005 | 1.93E-31 | 2.3 | TMEM150E   | 8.2         |
| ERRFI13        | 1.11E-35 | 0.6948846 | 0.702 | 0.536 | 2.68E-31 | 2.3 | ERRFI1     | 1.309701493 |
| EMCN1          | 1.99E-35 | 0.382516  | 0.112 | 0.029 | 4.80E-31 | 2.3 | EMCN       | 3.862068966 |
| TFPI2          | 2.15E-35 | 0.550582  | 0.544 | 0.32  | 5.17E-31 | 2.3 | TFPI       | 1.7         |
| ACRC2          | 2.74E-35 | 0.5527982 | 0.237 | 0.097 | 6.60E-31 | 2.3 | ACRC       | 2.443298969 |
| KRT86          | 3.21E-35 | 0.316673  | 0.07  | 0.013 | 7.73E-31 | 2.3 | KRT86      | 5.384615385 |
| COX7A24        | 6.69E-35 | 0.5956415 | 0.831 | 0.761 | 1.61E-30 | 2.3 | COX7A2     | 1.091984231 |
| PDSS12         | 8.07E-35 | 0.5398683 | 0.132 | 0.039 | 1.95E-30 | 2.3 | PDSS1      | 3.384615385 |
| TTC271         | 9.18E-35 | 0.5001869 | 0.163 | 0.055 | 2.21E-30 | 2.3 | TTC27      | 2.963636364 |
| FAM46A1        | 1.73E-34 | 0.7564834 | 0.329 | 0.166 | 4.16E-30 | 2.3 | FAM46A     | 1.981927711 |
| AP000695.4     | 1.75E-34 | 0.1574283 | 0.038 | 0.004 | 4.21E-30 | 2.3 | AP000695.  | 9.5         |
| LINC010311     | 1.90E-34 | 0.2716469 | 0.074 | 0.015 | 4.58E-30 | 2.3 | LINC01031  | 4.933333333 |
| ZNF1651        | 2.22E-34 | 0.7284812 | 0.232 | 0.098 | 5.36E-30 | 2.3 | ZNF165     | 2.367346939 |
| PCF111         | 3.14E-34 | 0.5955995 | 0.267 | 0.121 | 7.57E-30 | 2.3 | PCF11      | 2.20661157  |
| ASB151         | 3.21E-34 | 0.1929342 | 0.046 | 0.006 | 7.75E-30 | 2.3 | ASB15      | 7.666666667 |
| RP11-202G18.11 | 3.51E-34 | 0.1487922 | 0.041 | 0.005 | 8.47E-30 | 2.3 | RP11-202G  | 8.2         |
| CTD-2308B18.31 | 3.75E-34 | 0.2275385 | 0.062 | 0.011 | 9.05E-30 | 2.3 | CTD-2308B  | 5.636363636 |
| TMEM22         | 3.93E-34 | 0.5063629 | 0.539 | 0.342 | 9.47E-30 | 2.3 | TMEM2      | 1.576023392 |
| RP11-507B12.22 | 4.31E-34 | 0.5399325 | 0.237 | 0.098 | 1.04E-29 | 2.3 | RP11-507B  | 2.418367347 |

|                  |          |           |       |       |          |     |              |             |
|------------------|----------|-----------|-------|-------|----------|-----|--------------|-------------|
| PPP1R1C          | 4.99E-34 | 0.3995657 | 0.07  | 0.013 | 1.20E-29 | 2.3 | PPP1R1C      | 5.384615385 |
| RP1-272L16.1     | 5.10E-34 | 0.1000364 | 0.02  | 0.001 | 1.23E-29 | 2.3 | RP1-272L16.1 | 20          |
| HSP90AA14        | 5.98E-34 | 0.4511104 | 0.926 | 0.852 | 1.44E-29 | 2.3 | HSP90AA1     | 1.08685446  |
| BTG11            | 7.52E-34 | 0.5751732 | 0.735 | 0.577 | 1.81E-29 | 2.3 | BTG1         | 1.273830156 |
| LINGO13          | 1.64E-33 | 0.5177053 | 0.926 | 0.888 | 3.95E-29 | 2.3 | LINGO1       | 1.042792793 |
| CPNE31           | 2.71E-33 | 0.6906834 | 0.338 | 0.182 | 6.53E-29 | 2.3 | CPNE3        | 1.857142857 |
| PPM1K2           | 2.90E-33 | 0.6097572 | 0.299 | 0.146 | 7.00E-29 | 2.3 | PPM1K        | 2.047945205 |
| CHD12            | 2.98E-33 | 0.7125005 | 0.434 | 0.266 | 7.19E-29 | 2.3 | CHD1         | 1.631578947 |
| ADGRF21          | 6.21E-33 | 0.137693  | 0.038 | 0.004 | 1.50E-28 | 2.3 | ADGRF2       | 9.5         |
| RP11-174G6.11    | 6.41E-33 | 0.5732084 | 0.171 | 0.062 | 1.54E-28 | 2.3 | RP11-174G    | 2.758064516 |
| EGLN31           | 1.15E-32 | 0.6551821 | 0.292 | 0.142 | 2.76E-28 | 2.3 | EGLN3        | 2.056338028 |
| MYO5A1           | 1.41E-32 | 0.7015197 | 0.235 | 0.104 | 3.40E-28 | 2.3 | MYO5A        | 2.259615385 |
| L1TD11           | 1.54E-32 | 0.121378  | 0.027 | 0.002 | 3.72E-28 | 2.3 | L1TD1        | 13.5        |
| CCDC832          | 1.66E-32 | 0.2511397 | 0.084 | 0.019 | 4.01E-28 | 2.3 | CCDC83       | 4.421052632 |
| SLC17A81         | 1.69E-32 | 0.2173972 | 0.077 | 0.016 | 4.08E-28 | 2.3 | SLC17A8      | 4.8125      |
| PARK72           | 2.47E-32 | 0.6567891 | 0.59  | 0.452 | 5.96E-28 | 2.3 | PARK7        | 1.305309735 |
| RTKN21           | 2.48E-32 | 0.4242369 | 0.152 | 0.05  | 5.98E-28 | 2.3 | RTKN2        | 3.04        |
| HAP1             | 4.17E-32 | 0.1187101 | 0.034 | 0.003 | 1.00E-27 | 2.3 | HAP1         | 11.33333333 |
| LEKR1            | 5.00E-32 | 0.3748243 | 0.087 | 0.021 | 1.20E-27 | 2.3 | LEKR1        | 4.142857143 |
| LINC00877        | 7.30E-32 | 0.130769  | 0.028 | 0.002 | 1.76E-27 | 2.3 | LINC00877    | 14          |
| CALCRL           | 7.62E-32 | 0.1038177 | 0.027 | 0.002 | 1.84E-27 | 2.3 | CALCRL       | 13.5        |
| SLC9A1           | 8.86E-32 | 0.6117676 | 0.256 | 0.119 | 2.14E-27 | 2.3 | SLC9A1       | 2.151260504 |
| NUDT41           | 9.48E-32 | 0.4993529 | 0.184 | 0.07  | 2.29E-27 | 2.3 | NUDT4        | 2.628571429 |
| FLOT11           | 1.79E-31 | 0.8941231 | 0.25  | 0.119 | 4.31E-27 | 2.3 | FLOT1        | 2.100840336 |
| ERO1B2           | 2.36E-31 | 0.5593344 | 0.222 | 0.095 | 5.70E-27 | 2.3 | ERO1B        | 2.336842105 |
| POLN1            | 2.54E-31 | 0.4589513 | 0.132 | 0.042 | 6.12E-27 | 2.3 | POLN         | 3.142857143 |
| DYNLL13          | 3.60E-31 | 0.6624716 | 0.4   | 0.241 | 8.69E-27 | 2.3 | DYNLL1       | 1.659751037 |
| CYTIP1           | 5.18E-31 | 0.215397  | 0.052 | 0.008 | 1.25E-26 | 2.3 | CYTIP        | 6.5         |
| AIG11            | 5.53E-31 | 0.6393183 | 0.358 | 0.203 | 1.33E-26 | 2.3 | AIG1         | 1.763546798 |
| RP5-1085F17.3    | 6.54E-31 | 0.3265827 | 0.088 | 0.022 | 1.58E-26 | 2.3 | RP5-1085F    | 4           |
| VTCN11           | 7.13E-31 | 0.5456415 | 0.237 | 0.105 | 1.72E-26 | 2.3 | VTCN1        | 2.257142857 |
| GLA2             | 8.56E-31 | 0.656991  | 0.218 | 0.094 | 2.06E-26 | 2.3 | GLA          | 2.319148936 |
| RP11-340E6.1     | 9.95E-31 | 0.1352002 | 0.027 | 0.002 | 2.40E-26 | 2.3 | RP11-340E6.1 | 13.5        |
| RP4-633O19--A.13 | 1.80E-30 | 0.2772929 | 0.079 | 0.018 | 4.33E-26 | 2.3 | RP4-633O1    | 4.388888889 |
| C9orf153         | 1.88E-30 | 0.3106082 | 0.069 | 0.014 | 4.54E-26 | 2.3 | C9orf153     | 4.928571429 |
| MDC1             | 2.00E-30 | 0.3853852 | 0.088 | 0.022 | 4.81E-26 | 2.3 | MDC1         | 4           |
| RP5-857K21.41    | 2.56E-30 | 0.8405848 | 0.579 | 0.43  | 6.18E-26 | 2.3 | RP5-857K2    | 1.346511628 |
| AC008074.12      | 2.72E-30 | 0.3698214 | 0.126 | 0.039 | 6.56E-26 | 2.3 | AC008074     | 3.230769231 |
| ZSCAN16-AS12     | 2.94E-30 | 0.4705383 | 0.209 | 0.088 | 7.09E-26 | 2.3 | ZSCAN16-A    | 2.375       |
| BCL2L151         | 3.44E-30 | 0.1630321 | 0.038 | 0.005 | 8.29E-26 | 2.3 | BCL2L15      | 7.6         |
| EZR1             | 3.63E-30 | 0.6604263 | 0.541 | 0.373 | 8.74E-26 | 2.3 | EZR          | 1.450402145 |
| MAFB1            | 3.89E-30 | 0.4414951 | 0.139 | 0.046 | 9.38E-26 | 2.3 | MAFB         | 3.02173913  |
| DACT3-AS1        | 4.14E-30 | 0.1684625 | 0.032 | 0.003 | 9.97E-26 | 2.3 | DACT3-AS1    | 10.66666667 |
| FASN2            | 4.58E-30 | 0.4241625 | 0.145 | 0.049 | 1.10E-25 | 2.3 | FASN         | 2.959183673 |
| SNX27            | 5.21E-30 | 0.637762  | 0.292 | 0.15  | 1.26E-25 | 2.3 | SNX27        | 1.946666667 |
| HSP90B13         | 6.74E-30 | 0.5053211 | 0.669 | 0.503 | 1.62E-25 | 2.3 | HSP90B1      | 1.330019881 |
| PEBP42           | 6.76E-30 | 0.5180302 | 0.218 | 0.092 | 1.63E-25 | 2.3 | PEBP4        | 2.369565217 |
| CA23             | 7.25E-30 | 0.5330108 | 0.209 | 0.088 | 1.75E-25 | 2.3 | CA2          | 2.375       |
| ASB11            | 9.75E-30 | 0.1487658 | 0.034 | 0.004 | 2.35E-25 | 2.3 | ASB11        | 8.5         |
| SLCO2B11         | 1.08E-29 | 0.1200431 | 0.041 | 0.005 | 2.60E-25 | 2.3 | SLCO2B1      | 8.2         |
| RP11-567N4.21    | 1.13E-29 | 0.1057409 | 0.031 | 0.003 | 2.73E-25 | 2.3 | RP11-567N    | 10.33333333 |
| TCEB12           | 1.18E-29 | 0.7960696 | 0.458 | 0.303 | 2.86E-25 | 2.3 | TCEB1        | 1.511551155 |



|                |          |           |       |       |          |     |           |             |
|----------------|----------|-----------|-------|-------|----------|-----|-----------|-------------|
| TMCO13         | 1.19E-29 | 0.6829474 | 0.492 | 0.342 | 2.88E-25 | 2.3 | TMCO1     | 1.438596491 |
| CLDN113        | 2.09E-29 | 0.4119202 | 0.162 | 0.059 | 5.03E-25 | 2.3 | CLDN11    | 2.745762712 |
| MAST1          | 2.32E-29 | 0.201423  | 0.032 | 0.004 | 5.59E-25 | 2.3 | MAST1     | 8           |
| STOM2          | 2.65E-29 | 0.5890209 | 0.426 | 0.258 | 6.40E-25 | 2.3 | STOM      | 1.651162791 |
| SFPQ2          | 2.73E-29 | 0.6734346 | 0.378 | 0.226 | 6.59E-25 | 2.3 | SFPQ      | 1.672566372 |
| LINC005042     | 2.83E-29 | 0.4690308 | 0.208 | 0.087 | 6.82E-25 | 2.3 | LINC00504 | 2.390804598 |
| NRCAM          | 3.01E-29 | 0.1714639 | 0.045 | 0.007 | 7.27E-25 | 2.3 | NRCAM     | 6.428571429 |
| TCEANC21       | 3.17E-29 | 0.6998025 | 0.39  | 0.235 | 7.63E-25 | 2.3 | TCEANC2   | 1.659574468 |
| ENPP12         | 3.44E-29 | 0.4975375 | 0.272 | 0.131 | 8.30E-25 | 2.3 | ENPP1     | 2.076335878 |
| ATP5G13        | 4.96E-29 | 0.6579065 | 0.323 | 0.179 | 1.20E-24 | 2.3 | ATP5G1    | 1.804469274 |
| RPN22          | 5.06E-29 | 0.5955103 | 0.424 | 0.264 | 1.22E-24 | 2.3 | RPN2      | 1.606060606 |
| TUFT13         | 5.26E-29 | 0.6149699 | 0.327 | 0.179 | 1.27E-24 | 2.3 | TUFT1     | 1.826815642 |
| IL20RA1        | 5.50E-29 | 0.493055  | 0.146 | 0.051 | 1.33E-24 | 2.3 | IL20RA    | 2.862745098 |
| ST8SIA5        | 6.07E-29 | 0.1110828 | 0.025 | 0.002 | 1.46E-24 | 2.3 | ST8SIA5   | 12.5        |
| CLSTN22        | 6.61E-29 | 0.4657695 | 0.177 | 0.068 | 1.59E-24 | 2.3 | CLSTN2    | 2.602941176 |
| RNF103-CHMP3   | 7.64E-29 | 0.3867693 | 0.108 | 0.032 | 1.84E-24 | 2.3 | RNF103-CH | 3.375       |
| HBEGF1         | 8.32E-29 | 0.3056202 | 0.1   | 0.028 | 2.01E-24 | 2.3 | HBEGF     | 3.571428571 |
| SMIM142        | 1.00E-28 | 0.6312331 | 0.562 | 0.395 | 2.42E-24 | 2.3 | SMIM14    | 1.42278481  |
| CDKN1A         | 1.20E-28 | 0.4962215 | 0.164 | 0.063 | 2.89E-24 | 2.3 | CDKN1A    | 2.603174603 |
| SLC16A9        | 1.26E-28 | 0.1408267 | 0.034 | 0.004 | 3.03E-24 | 2.3 | SLC16A9   | 8.5         |
| SYT161         | 1.36E-28 | 0.1528776 | 0.039 | 0.005 | 3.27E-24 | 2.3 | SYT16     | 7.8         |
| ATP1A12        | 1.66E-28 | 0.6272283 | 0.633 | 0.502 | 4.00E-24 | 2.3 | ATP1A1    | 1.260956175 |
| CNBD21         | 1.85E-28 | 0.204299  | 0.049 | 0.008 | 4.47E-24 | 2.3 | CNBD2     | 6.125       |
| CYCS4          | 2.63E-28 | 0.7041324 | 0.66  | 0.517 | 6.35E-24 | 2.3 | CYCS      | 1.276595745 |
| IDI2           | 3.15E-28 | 0.1072751 | 0.018 | 0.001 | 7.60E-24 | 2.3 | IDI2      | 18          |
| RP13-131K19.1  | 3.49E-28 | 0.1113401 | 0.02  | 0.001 | 8.42E-24 | 2.3 | RP13-131K | 20          |
| BAG31          | 4.01E-28 | 0.4956331 | 0.173 | 0.068 | 9.66E-24 | 2.3 | BAG3      | 2.544117647 |
| FAM71F11       | 4.36E-28 | 0.1108148 | 0.029 | 0.003 | 1.05E-23 | 2.3 | FAM71F1   | 9.666666667 |
| CRACR2A2       | 4.42E-28 | 0.2879973 | 0.083 | 0.021 | 1.07E-23 | 2.3 | CRACR2A   | 3.952380952 |
| RP11-53O19.11  | 4.59E-28 | 0.3580039 | 0.069 | 0.015 | 1.11E-23 | 2.3 | RP11-53O1 | 4.6         |
| ATXN11         | 5.36E-28 | 0.6952041 | 0.639 | 0.512 | 1.29E-23 | 2.3 | ATXN1     | 1.248046875 |
| CH17-437K3.11  | 5.81E-28 | 0.1815328 | 0.044 | 0.007 | 1.40E-23 | 2.3 | CH17-437K | 6.285714286 |
| NEK112         | 6.04E-28 | 0.4620866 | 0.16  | 0.06  | 1.46E-23 | 2.3 | NEK11     | 2.666666667 |
| ZC3HAV11       | 6.53E-28 | 0.6624815 | 0.331 | 0.185 | 1.57E-23 | 2.3 | ZC3HAV1   | 1.789189189 |
| SLC9C11        | 8.76E-28 | 0.4497437 | 0.152 | 0.055 | 2.11E-23 | 2.3 | SLC9C1    | 2.763636364 |
| CTC-490E21.122 | 1.30E-27 | 0.434142  | 0.15  | 0.055 | 3.14E-23 | 2.3 | CTC-490E2 | 2.727272727 |
| PKD1L31        | 1.31E-27 | 0.348213  | 0.107 | 0.032 | 3.17E-23 | 2.3 | PKD1L3    | 3.34375     |
| AC015971.2     | 1.53E-27 | 0.4266602 | 0.124 | 0.041 | 3.69E-23 | 2.3 | AC015971. | 3.024390244 |
| TDP2           | 1.58E-27 | 0.4009271 | 0.126 | 0.042 | 3.80E-23 | 2.3 | TDP2      | 3           |
| SLC26A33       | 1.71E-27 | 0.4392626 | 0.886 | 0.786 | 4.13E-23 | 2.3 | SLC26A3   | 1.127226463 |
| BAMBI1         | 1.80E-27 | 0.552981  | 0.219 | 0.1   | 4.33E-23 | 2.3 | BAMBI     | 2.19        |
| ASAH12         | 1.86E-27 | 0.5061019 | 0.218 | 0.099 | 4.48E-23 | 2.3 | ASAH1     | 2.202020202 |
| MATN1          | 2.50E-27 | 0.1609399 | 0.022 | 0.002 | 6.03E-23 | 2.3 | MATN1     | 11          |
| ACTB2          | 2.92E-27 | 0.751623  | 0.754 | 0.64  | 7.04E-23 | 2.3 | ACTB      | 1.178125    |
| RP13-143G15.4  | 4.11E-27 | 0.2157525 | 0.044 | 0.007 | 9.90E-23 | 2.3 | RP13-143G | 6.285714286 |
| H2AFV2         | 4.80E-27 | 0.4693818 | 0.201 | 0.087 | 1.16E-22 | 2.3 | H2AFV     | 2.310344828 |
| BZW2           | 5.93E-27 | 0.636055  | 0.267 | 0.137 | 1.43E-22 | 2.3 | BZW2      | 1.948905109 |
| C18orf82       | 8.57E-27 | 0.4877156 | 0.17  | 0.068 | 2.07E-22 | 2.3 | C18orf8   | 2.5         |
| USP501         | 1.17E-26 | 0.1840744 | 0.052 | 0.01  | 2.81E-22 | 2.3 | USP50     | 5.2         |
| SLIRP3         | 1.27E-26 | 0.8909785 | 0.435 | 0.306 | 3.05E-22 | 2.3 | SLIRP     | 1.421568627 |
| TMEM39B1       | 1.45E-26 | 0.2426789 | 0.065 | 0.014 | 3.51E-22 | 2.3 | TMEM39B   | 4.642857143 |
| NPNT           | 1.49E-26 | 0.4132187 | 0.094 | 0.027 | 3.60E-22 | 2.3 | NPNT      | 3.481481481 |

|                |          |           |       |       |          |     |            |             |
|----------------|----------|-----------|-------|-------|----------|-----|------------|-------------|
| LGALS4         | 1.57E-26 | 0.1417635 | 0.035 | 0.005 | 3.78E-22 | 2.3 | LGALS4     | 7           |
| SPSB2          | 2.10E-26 | 0.4189406 | 0.032 | 0.004 | 5.07E-22 | 2.3 | SPSB2      | 8           |
| EREG2          | 2.31E-26 | 0.4632083 | 0.444 | 0.256 | 5.57E-22 | 2.3 | EREG       | 1.734375    |
| TNIK2          | 2.40E-26 | 0.5847092 | 0.299 | 0.158 | 5.79E-22 | 2.3 | TNIK       | 1.892405063 |
| SLC2A101       | 2.45E-26 | 0.2511255 | 0.063 | 0.014 | 5.90E-22 | 2.3 | SLC2A10    | 4.5         |
| SH3KBP11       | 2.47E-26 | 0.6715169 | 0.216 | 0.101 | 5.94E-22 | 2.3 | SH3KBP1    | 2.138613861 |
| CTD-2054N24.2  | 2.69E-26 | 0.2077345 | 0.055 | 0.011 | 6.50E-22 | 2.3 | CTD-2054N  | 5           |
| DUSP51         | 2.84E-26 | 0.5969799 | 0.389 | 0.234 | 6.85E-22 | 2.3 | DUSP5      | 1.662393162 |
| SIX42          | 3.98E-26 | 0.4937804 | 0.183 | 0.077 | 9.60E-22 | 2.3 | SIX4       | 2.376623377 |
| VSIG101        | 4.16E-26 | 0.4294779 | 0.11  | 0.035 | 1.00E-21 | 2.3 | VSIG10     | 3.142857143 |
| CKS22          | 5.34E-26 | 0.5659771 | 0.361 | 0.214 | 1.29E-21 | 2.3 | CKS2       | 1.686915888 |
| GATB           | 6.74E-26 | 0.191907  | 0.049 | 0.009 | 1.62E-21 | 2.3 | GATB       | 5.444444444 |
| CTD-2587M2.11  | 8.01E-26 | 0.3323917 | 0.093 | 0.026 | 1.93E-21 | 2.3 | CTD-2587M  | 3.576923077 |
| NR4A31         | 8.86E-26 | 0.3431542 | 0.076 | 0.019 | 2.14E-21 | 2.3 | NR4A3      | 4           |
| RP4-655J12.4   | 1.01E-25 | 0.2303719 | 0.045 | 0.008 | 2.43E-21 | 2.3 | RP4-655J12 | 5.625       |
| KIF24          | 1.29E-25 | 0.1704452 | 0.044 | 0.007 | 3.11E-21 | 2.3 | KIF24      | 6.285714286 |
| NEFM           | 1.34E-25 | 0.1007626 | 0.017 | 0.001 | 3.23E-21 | 2.3 | NEFM       | 17          |
| RIIAD11        | 1.49E-25 | 0.1316476 | 0.031 | 0.004 | 3.59E-21 | 2.3 | RIIAD1     | 7.75        |
| ATF7IP21       | 1.50E-25 | 0.4382196 | 0.122 | 0.042 | 3.62E-21 | 2.3 | ATF7IP2    | 2.904761905 |
| SLC40A11       | 1.87E-25 | 0.2727465 | 0.08  | 0.021 | 4.51E-21 | 2.3 | SLC40A1    | 3.80952381  |
| NDUFB41        | 2.76E-25 | 0.7626952 | 0.546 | 0.433 | 6.66E-21 | 2.3 | NDUFB4     | 1.260969977 |
| ANKRD46        | 3.09E-25 | 0.366113  | 0.112 | 0.037 | 7.45E-21 | 2.3 | ANKRD46    | 3.027027027 |
| MYRFL1         | 3.31E-25 | 0.5466308 | 0.171 | 0.071 | 7.98E-21 | 2.3 | MYRFL      | 2.408450704 |
| RP11-571L19.7  | 3.48E-25 | 0.221325  | 0.038 | 0.006 | 8.38E-21 | 2.3 | RP11-571L  | 6.333333333 |
| CCDC343        | 3.68E-25 | 0.3323405 | 0.079 | 0.02  | 8.87E-21 | 2.3 | CCDC34     | 3.95        |
| RP11-1035H13.2 | 3.90E-25 | 0.2098189 | 0.049 | 0.009 | 9.40E-21 | 2.3 | RP11-1035  | 5.444444444 |
| GADD45B2       | 4.06E-25 | 0.7341445 | 0.225 | 0.106 | 9.78E-21 | 2.3 | GADD45B    | 2.122641509 |
| GPS22          | 5.23E-25 | 0.6164694 | 0.299 | 0.167 | 1.26E-20 | 2.3 | GPS2       | 1.790419162 |
| DPH1           | 5.26E-25 | 0.1493519 | 0.029 | 0.003 | 1.27E-20 | 2.3 | DPH1       | 9.666666667 |
| HSPA53         | 6.79E-25 | 0.3625364 | 0.61  | 0.446 | 1.64E-20 | 2.3 | HSPA5      | 1.367713004 |
| SLC7A22        | 6.90E-25 | 0.4698736 | 0.475 | 0.296 | 1.66E-20 | 2.3 | SLC7A2     | 1.60472973  |
| C18orf321      | 7.31E-25 | 0.5656618 | 0.281 | 0.151 | 1.76E-20 | 2.3 | C18orf32   | 1.860927152 |
| ZBTB102        | 7.88E-25 | 0.6090618 | 0.402 | 0.253 | 1.90E-20 | 2.3 | ZBTB10     | 1.588932806 |
| PLK21          | 8.34E-25 | 0.6513324 | 0.254 | 0.131 | 2.01E-20 | 2.3 | PLK2       | 1.938931298 |
| DNAH7          | 8.48E-25 | 0.3952671 | 0.097 | 0.029 | 2.05E-20 | 2.3 | DNAH7      | 3.344827586 |
| AFF32          | 8.88E-25 | 0.3101498 | 0.527 | 0.334 | 2.14E-20 | 2.3 | AFF3       | 1.577844311 |
| RP11-90K6.11   | 8.98E-25 | 0.2006578 | 0.053 | 0.011 | 2.17E-20 | 2.3 | RP11-90K6  | 4.818181818 |
| RP11-405A12.2  | 1.29E-24 | 0.2849516 | 0.072 | 0.018 | 3.11E-20 | 2.3 | RP11-405A  | 4           |
| TRIM242        | 1.42E-24 | 0.5342428 | 0.184 | 0.081 | 3.44E-20 | 2.3 | TRIM24     | 2.271604938 |
| EGOT2          | 1.61E-24 | 0.558397  | 0.23  | 0.113 | 3.89E-20 | 2.3 | EGOT       | 2.03539823  |
| EMP21          | 1.69E-24 | 0.4802115 | 0.242 | 0.119 | 4.07E-20 | 2.3 | EMP2       | 2.033613445 |
| RP5-940J5.61   | 1.79E-24 | 0.2482277 | 0.067 | 0.016 | 4.33E-20 | 2.3 | RP5-940J5  | 4.1875      |
| PLEKHB22       | 1.89E-24 | 0.5188421 | 0.294 | 0.16  | 4.56E-20 | 2.3 | PLEKHB2    | 1.8375      |
| TTC39A2        | 2.16E-24 | 0.4633536 | 0.132 | 0.048 | 5.21E-20 | 2.3 | TTC39A     | 2.75        |
| PBDC11         | 2.65E-24 | 0.6474123 | 0.25  | 0.131 | 6.38E-20 | 2.3 | PBDC1      | 1.908396947 |
| EIF4E4         | 2.84E-24 | 0.6569817 | 0.511 | 0.379 | 6.85E-20 | 2.3 | EIF4E      | 1.34828496  |
| TSPAN132       | 3.34E-24 | 0.4951463 | 0.226 | 0.11  | 8.05E-20 | 2.3 | TSPAN13    | 2.054545455 |
| EIF1AX2        | 3.90E-24 | 0.545238  | 0.378 | 0.237 | 9.40E-20 | 2.3 | EIF1AX     | 1.594936709 |
| SERF22         | 3.90E-24 | 0.5097324 | 0.539 | 0.391 | 9.41E-20 | 2.3 | SERF2      | 1.378516624 |
| IQUB1          | 4.00E-24 | 0.2729558 | 0.058 | 0.012 | 9.63E-20 | 2.3 | IQUB       | 4.833333333 |
| TRNP1          | 4.10E-24 | 0.236676  | 0.053 | 0.011 | 9.88E-20 | 2.3 | TRNP1      | 4.818181818 |
| ELF12          | 4.94E-24 | 0.5018722 | 0.663 | 0.526 | 1.19E-19 | 2.3 | ELF1       | 1.260456274 |

|               |          |           |       |       |          |     |           |             |
|---------------|----------|-----------|-------|-------|----------|-----|-----------|-------------|
| AHNAK         | 5.18E-24 | 0.5934921 | 0.489 | 0.353 | 1.25E-19 | 2.3 | AHNAK     | 1.385269122 |
| SON2          | 5.62E-24 | 0.5213918 | 0.765 | 0.677 | 1.36E-19 | 2.3 | SON       | 1.129985229 |
| EFNA12        | 7.21E-24 | 0.7009848 | 0.375 | 0.236 | 1.74E-19 | 2.3 | EFNA1     | 1.588983051 |
| SAP182        | 8.16E-24 | 0.551816  | 0.663 | 0.569 | 1.97E-19 | 2.3 | SAP18     | 1.165202109 |
| GYS1          | 8.21E-24 | 0.4667847 | 0.143 | 0.056 | 1.98E-19 | 2.3 | GYS1      | 2.553571429 |
| AC002117.12   | 8.65E-24 | 0.2689941 | 0.072 | 0.018 | 2.09E-19 | 2.3 | AC002117. | 4           |
| ZFAND52       | 9.86E-24 | 0.6521568 | 0.555 | 0.432 | 2.38E-19 | 2.3 | ZFAND5    | 1.284722222 |
| PHTF1         | 1.06E-23 | 0.4569307 | 0.143 | 0.056 | 2.57E-19 | 2.3 | PHTF1     | 2.553571429 |
| CPEB41        | 1.35E-23 | 0.6546083 | 0.395 | 0.258 | 3.26E-19 | 2.3 | CPEB4     | 1.531007752 |
| BCOR2         | 1.39E-23 | 0.5145685 | 0.657 | 0.509 | 3.34E-19 | 2.3 | BCOR      | 1.290766208 |
| SRF1          | 1.46E-23 | 0.2496129 | 0.077 | 0.021 | 3.52E-19 | 2.3 | SRF       | 3.666666667 |
| CTD-2336O2.12 | 1.63E-23 | 0.1595494 | 0.046 | 0.009 | 3.92E-19 | 2.3 | CTD-2336C | 5.111111111 |
| ATP1A3        | 1.75E-23 | 0.2281623 | 0.028 | 0.003 | 4.21E-19 | 2.3 | ATP1A3    | 9.333333333 |
| RP1-288H2.2   | 1.89E-23 | 0.1566762 | 0.018 | 0.001 | 4.55E-19 | 2.3 | RP1-288H2 | 18          |
| SLC8A2        | 2.13E-23 | 0.1021331 | 0.028 | 0.003 | 5.14E-19 | 2.3 | SLC8A2    | 9.333333333 |
| NEDD93        | 2.25E-23 | 0.5247005 | 0.514 | 0.368 | 5.43E-19 | 2.3 | NEDD9     | 1.39673913  |
| SOWAHC        | 2.27E-23 | 0.3869773 | 0.118 | 0.041 | 5.47E-19 | 2.3 | SOWAHC    | 2.87804878  |
| SELPLG1       | 2.52E-23 | 0.1857398 | 0.035 | 0.005 | 6.09E-19 | 2.3 | SELPLG    | 7           |
| TMSB102       | 2.62E-23 | 0.4428887 | 0.815 | 0.731 | 6.32E-19 | 2.3 | TMSB10    | 1.114911081 |
| TRPM3         | 2.67E-23 | 0.5069227 | 0.105 | 0.035 | 6.44E-19 | 2.3 | TRPM3     | 3           |
| IRX31         | 2.77E-23 | 0.4665126 | 0.192 | 0.088 | 6.67E-19 | 2.3 | IRX3      | 2.181818182 |
| VIT1          | 2.81E-23 | 0.1691028 | 0.044 | 0.008 | 6.78E-19 | 2.3 | VIT       | 5.5         |
| GIPC21        | 2.94E-23 | 0.4203972 | 0.104 | 0.034 | 7.09E-19 | 2.3 | GIPC2     | 3.058823529 |
| NRIP3         | 3.07E-23 | 0.3526784 | 0.119 | 0.042 | 7.40E-19 | 2.3 | NRIP3     | 2.833333333 |
| GSR1          | 3.21E-23 | 0.336601  | 0.098 | 0.031 | 7.75E-19 | 2.3 | GSR       | 3.161290323 |
| OST42         | 4.25E-23 | 0.5958194 | 0.532 | 0.412 | 1.02E-18 | 2.3 | OST4      | 1.291262136 |
| FOS2          | 4.50E-23 | 1.257253  | 0.355 | 0.228 | 1.09E-18 | 2.3 | FOS       | 1.557017544 |
| FNDC71        | 4.78E-23 | 0.1292188 | 0.035 | 0.005 | 1.15E-18 | 2.3 | FNDC7     | 7           |
| OTOA1         | 5.13E-23 | 0.1299226 | 0.029 | 0.004 | 1.24E-18 | 2.3 | OTOA      | 7.25        |
| MORN23        | 6.08E-23 | 0.4222378 | 0.147 | 0.059 | 1.47E-18 | 2.3 | MORN2     | 2.491525424 |
| MORC4         | 6.31E-23 | 0.3265924 | 0.086 | 0.025 | 1.52E-18 | 2.3 | MORC4     | 3.44        |
| SNU132        | 6.36E-23 | 0.496867  | 0.601 | 0.473 | 1.53E-18 | 2.3 | SNU13     | 1.270613108 |
| TRANK11       | 6.75E-23 | 0.2314667 | 0.053 | 0.011 | 1.63E-18 | 2.3 | TRANK1    | 4.818181818 |
| MTFR22        | 7.00E-23 | 0.1582625 | 0.049 | 0.01  | 1.69E-18 | 2.3 | MTFR2     | 4.9         |
| SKP14         | 7.44E-23 | 0.4275895 | 0.857 | 0.805 | 1.79E-18 | 2.3 | SKP1      | 1.064596273 |
| POLR2A        | 8.34E-23 | 0.7576959 | 0.288 | 0.164 | 2.01E-18 | 2.3 | POLR2A    | 1.756097561 |
| DAND5         | 8.57E-23 | 0.1138784 | 0.018 | 0.001 | 2.07E-18 | 2.3 | DAND5     | 18          |
| SEPP13        | 9.69E-23 | 0.6142014 | 0.449 | 0.309 | 2.34E-18 | 2.3 | SEPP1     | 1.453074434 |
| ATP13A42      | 1.00E-22 | 0.3309685 | 0.101 | 0.033 | 2.41E-18 | 2.3 | ATP13A4   | 3.060606061 |
| RP11-252E2.21 | 1.55E-22 | 0.1753554 | 0.052 | 0.011 | 3.75E-18 | 2.3 | RP11-252E | 4.727272727 |
| NDUFA122      | 1.68E-22 | 0.5687805 | 0.334 | 0.208 | 4.06E-18 | 2.3 | NDUFA12   | 1.605769231 |
| RHOH1         | 1.71E-22 | 0.3364968 | 0.097 | 0.031 | 4.12E-18 | 2.3 | RHOH      | 3.129032258 |
| KRT181        | 1.93E-22 | 0.4449128 | 0.218 | 0.106 | 4.65E-18 | 2.3 | KRT18     | 2.056603774 |
| PABPC15       | 2.12E-22 | 0.4833467 | 0.795 | 0.728 | 5.11E-18 | 2.3 | PABPC1    | 1.092032967 |
| ARL4A2        | 2.21E-22 | 0.6023991 | 0.226 | 0.115 | 5.32E-18 | 2.3 | ARL4A     | 1.965217391 |
| AC016723.4    | 2.23E-22 | 0.148067  | 0.041 | 0.007 | 5.38E-18 | 2.3 | AC016723. | 5.857142857 |
| ANKRD261      | 3.06E-22 | 0.4976582 | 0.169 | 0.075 | 7.37E-18 | 2.3 | ANKRD26   | 2.253333333 |
| AC008686.1    | 3.68E-22 | 0.1515907 | 0.029 | 0.004 | 8.88E-18 | 2.3 | AC008686. | 7.25        |
| HGD2          | 4.11E-22 | 0.2116874 | 0.063 | 0.015 | 9.91E-18 | 2.3 | HGD       | 4.2         |
| LDHAL6A       | 4.15E-22 | 0.1089794 | 0.025 | 0.003 | 1.00E-17 | 2.3 | LDHAL6A   | 8.333333333 |
| SLC9C21       | 4.27E-22 | 0.2127852 | 0.042 | 0.008 | 1.03E-17 | 2.3 | SLC9C2    | 5.25        |
| CDC423        | 4.31E-22 | 0.480661  | 0.785 | 0.714 | 1.04E-17 | 2.3 | CDC42     | 1.099439776 |

|                |          |           |       |       |          |     |            |             |
|----------------|----------|-----------|-------|-------|----------|-----|------------|-------------|
| SCGB2A22       | 4.32E-22 | 1.273157  | 0.426 | 0.27  | 1.04E-17 | 2.3 | SCGB2A2    | 1.577777778 |
| GPLD1          | 5.01E-22 | 0.1434754 | 0.041 | 0.007 | 1.21E-17 | 2.3 | GPLD1      | 5.857142857 |
| MRPL242        | 5.32E-22 | 0.3869664 | 0.152 | 0.063 | 1.28E-17 | 2.3 | MRPL24     | 2.412698413 |
| C19orf38       | 5.99E-22 | 0.1790203 | 0.035 | 0.006 | 1.44E-17 | 2.3 | C19orf38   | 5.833333333 |
| RASEF2         | 6.32E-22 | 0.4825827 | 0.42  | 0.269 | 1.52E-17 | 2.3 | RASEF      | 1.56133829  |
| NFS1           | 7.54E-22 | 0.1448901 | 0.028 | 0.004 | 1.82E-17 | 2.3 | NFS1       | 7           |
| BTRC2          | 9.31E-22 | 0.6261262 | 0.396 | 0.26  | 2.24E-17 | 2.3 | BTRC       | 1.523076923 |
| C11orf651      | 1.01E-21 | 0.284135  | 0.067 | 0.018 | 2.44E-17 | 2.3 | C11orf65   | 3.722222222 |
| AFMID          | 1.32E-21 | 0.7105576 | 0.229 | 0.122 | 3.18E-17 | 2.3 | AFMID      | 1.87704918  |
| RP11-428J1.4   | 1.34E-21 | 0.1008521 | 0.027 | 0.003 | 3.23E-17 | 2.3 | RP11-428J1 | 9           |
| METTL7A2       | 1.40E-21 | 0.3915667 | 0.131 | 0.051 | 3.38E-17 | 2.3 | METTL7A    | 2.568627451 |
| ZNF34          | 1.45E-21 | 0.1098262 | 0.029 | 0.004 | 3.50E-17 | 2.3 | ZNF34      | 7.25        |
| FAM117B        | 1.63E-21 | 0.3733859 | 0.115 | 0.042 | 3.93E-17 | 2.3 | FAM117B    | 2.738095238 |
| PRR15L1        | 1.70E-21 | 0.3944687 | 0.098 | 0.033 | 4.09E-17 | 2.3 | PRR15L     | 2.96969697  |
| MUC41          | 1.75E-21 | 0.1360824 | 0.041 | 0.007 | 4.21E-17 | 2.3 | MUC4       | 5.857142857 |
| NDUFB91        | 1.86E-21 | 0.5467791 | 0.346 | 0.219 | 4.49E-17 | 2.3 | NDUFB9     | 1.579908676 |
| TFF12          | 2.30E-21 | 0.6183353 | 0.213 | 0.104 | 5.54E-17 | 2.3 | TFF1       | 2.048076923 |
| TBX32          | 2.35E-21 | 0.4297608 | 0.424 | 0.267 | 5.66E-17 | 2.3 | TBX3       | 1.588014981 |
| PGRMC12        | 2.48E-21 | 0.366187  | 0.181 | 0.083 | 5.99E-17 | 2.3 | PGRMC1     | 2.180722892 |
| PTGER4         | 2.93E-21 | 0.1988849 | 0.042 | 0.008 | 7.06E-17 | 2.3 | PTGER4     | 5.25        |
| LINC003931     | 2.95E-21 | 0.2501848 | 0.063 | 0.016 | 7.11E-17 | 2.3 | LINC00393  | 3.9375      |
| XG1            | 3.03E-21 | 0.2376929 | 0.052 | 0.011 | 7.32E-17 | 2.3 | XG         | 4.727272727 |
| ITGA102        | 3.05E-21 | 0.354878  | 0.132 | 0.052 | 7.36E-17 | 2.3 | ITGA10     | 2.538461538 |
| RP11-21G20.3   | 3.17E-21 | 0.1142407 | 0.01  | 0     | 7.65E-17 | 2.3 | RP11-21G2  | #DIV/0!     |
| CDKL12         | 3.89E-21 | 0.4101716 | 0.133 | 0.053 | 9.39E-17 | 2.3 | CDKL1      | 2.509433962 |
| CYB5D1         | 4.31E-21 | 0.1781427 | 0.041 | 0.008 | 1.04E-16 | 2.3 | CYB5D1     | 5.125       |
| FOXA12         | 4.61E-21 | 0.4646012 | 0.226 | 0.116 | 1.11E-16 | 2.3 | FOXA1      | 1.948275862 |
| RP11-392P7.6   | 4.93E-21 | 0.4119623 | 0.125 | 0.048 | 1.19E-16 | 2.3 | RP11-392P  | 2.604166667 |
| TSPAN61        | 5.58E-21 | 0.5505874 | 0.294 | 0.174 | 1.35E-16 | 2.3 | TSPAN6     | 1.689655172 |
| MRC21          | 5.98E-21 | 0.1715122 | 0.049 | 0.01  | 1.44E-16 | 2.3 | MRC2       | 4.9         |
| SUGCT1         | 6.21E-21 | 0.448445  | 0.115 | 0.043 | 1.50E-16 | 2.3 | SUGCT      | 2.674418605 |
| NRXN32         | 6.81E-21 | 0.4895419 | 0.237 | 0.125 | 1.64E-16 | 2.3 | NRXN3      | 1.896       |
| PIGK1          | 7.16E-21 | 0.4268925 | 0.176 | 0.081 | 1.73E-16 | 2.3 | PIGK       | 2.172839506 |
| THUMPD3-AS13   | 7.27E-21 | 0.867822  | 0.336 | 0.222 | 1.75E-16 | 2.3 | THUMPD3-   | 1.513513514 |
| CUL9           | 7.85E-21 | 0.1984684 | 0.049 | 0.011 | 1.89E-16 | 2.3 | CUL9       | 4.454545455 |
| LINC00935      | 7.87E-21 | 0.2750717 | 0.039 | 0.007 | 1.90E-16 | 2.3 | LINC00935  | 5.571428571 |
| TPT13          | 8.12E-21 | 0.252837  | 0.914 | 0.85  | 1.96E-16 | 2.3 | TPT1       | 1.075294118 |
| PPP1R101       | 1.01E-20 | 0.6241642 | 0.215 | 0.112 | 2.44E-16 | 2.3 | PPP1R10    | 1.919642857 |
| CSRNP11        | 1.18E-20 | 0.3619894 | 0.118 | 0.044 | 2.86E-16 | 2.3 | CSRNP1     | 2.681818182 |
| RP11-863P13.51 | 1.20E-20 | 0.1425345 | 0.031 | 0.005 | 2.89E-16 | 2.3 | RP11-863P  | 6.2         |
| MYH10          | 1.24E-20 | 0.4741973 | 0.152 | 0.065 | 2.98E-16 | 2.3 | MYH10      | 2.338461538 |
| PPIA4          | 1.37E-20 | 0.4049292 | 0.857 | 0.803 | 3.29E-16 | 2.3 | PPIA       | 1.067247821 |
| IER2           | 1.37E-20 | 0.4688982 | 0.174 | 0.081 | 3.30E-16 | 2.3 | IER2       | 2.148148148 |
| IL1R11         | 1.76E-20 | 0.4060011 | 0.159 | 0.07  | 4.25E-16 | 2.3 | IL1R1      | 2.271428571 |
| MLPH2          | 2.35E-20 | 0.4242237 | 0.16  | 0.071 | 5.65E-16 | 2.3 | MLPH       | 2.253521127 |
| ZNF788         | 2.53E-20 | 0.1816836 | 0.052 | 0.012 | 6.11E-16 | 2.3 | ZNF788     | 4.333333333 |
| ATCAY          | 2.83E-20 | 0.22064   | 0.029 | 0.004 | 6.81E-16 | 2.3 | ATCAY      | 7.25        |
| RP11-486P11.1  | 2.91E-20 | 0.1571211 | 0.042 | 0.008 | 7.02E-16 | 2.3 | RP11-486P  | 5.25        |
| NEK8           | 3.01E-20 | 0.2075223 | 0.052 | 0.012 | 7.25E-16 | 2.3 | NEK8       | 4.333333333 |
| NPFFR22        | 3.56E-20 | 0.2633768 | 0.08  | 0.024 | 8.59E-16 | 2.3 | NPFFR2     | 3.333333333 |
| ATP5L5         | 4.02E-20 | 0.3824179 | 0.847 | 0.809 | 9.69E-16 | 2.3 | ATP5L      | 1.04697157  |
| RP11-353N4.5   | 4.35E-20 | 0.1317395 | 0.025 | 0.003 | 1.05E-15 | 2.3 | RP11-353N  | 8.333333333 |

|                 |        |          |           |       |       |          |     |           |             |
|-----------------|--------|----------|-----------|-------|-------|----------|-----|-----------|-------------|
| EIF4G22         |        | 4.51E-20 | 0.5796021 | 0.51  | 0.39  | 1.09E-15 | 2.3 | EIF4G2    | 1.307692308 |
|                 | Sep-42 | 4.54E-20 | 0.2323604 | 0.065 | 0.017 | 1.09E-15 | 2.3 | Sep-04    | 3.823529412 |
| RAP2A           |        | 4.69E-20 | 0.2906502 | 0.098 | 0.034 | 1.13E-15 | 2.3 | RAP2A     | 2.882352941 |
| DAD13           |        | 5.22E-20 | 0.5068956 | 0.601 | 0.494 | 1.26E-15 | 2.3 | DAD1      | 1.21659919  |
| RP11-18H7.1     |        | 5.24E-20 | 0.3061024 | 0.09  | 0.03  | 1.26E-15 | 2.3 | RP11-18H7 | 3           |
| GNG4            |        | 5.65E-20 | 0.1359432 | 0.037 | 0.006 | 1.36E-15 | 2.3 | GNG4      | 6.166666667 |
| HSBP11          |        | 5.78E-20 | 0.4823714 | 0.646 | 0.553 | 1.39E-15 | 2.3 | HSBP1     | 1.168173599 |
| HSPB111         |        | 6.46E-20 | 0.4057061 | 0.201 | 0.099 | 1.56E-15 | 2.3 | HSPB11    | 2.03030303  |
| PER3            |        | 6.79E-20 | 0.3410915 | 0.103 | 0.037 | 1.64E-15 | 2.3 | PER3      | 2.783783784 |
| GTF2H53         |        | 7.13E-20 | 0.6278991 | 0.329 | 0.213 | 1.72E-15 | 2.3 | GTF2H5    | 1.544600939 |
| CATSPERD        |        | 7.19E-20 | 0.2864409 | 0.066 | 0.018 | 1.73E-15 | 2.3 | CATSPERD  | 3.666666667 |
| EIF5AL12        |        | 7.20E-20 | 0.3243672 | 0.119 | 0.046 | 1.74E-15 | 2.3 | EIF5AL1   | 2.586956522 |
| KCNB1           |        | 8.32E-20 | 0.1516343 | 0.027 | 0.004 | 2.01E-15 | 2.3 | KCNB1     | 6.75        |
| RP11-589M4.3    |        | 8.88E-20 | 0.1215577 | 0.027 | 0.004 | 2.14E-15 | 2.3 | RP11-589M | 6.75        |
| RP3-393E18.21   |        | 9.89E-20 | 0.1144572 | 0.029 | 0.004 | 2.38E-15 | 2.3 | RP3-393E1 | 7.25        |
| WDR611          |        | 1.08E-19 | 0.4540903 | 0.215 | 0.111 | 2.60E-15 | 2.3 | WDR61     | 1.936936937 |
| TMEM2583        |        | 1.13E-19 | 0.442258  | 0.687 | 0.597 | 2.73E-15 | 2.3 | TMEM258   | 1.150753769 |
| RASGEF1B3       |        | 1.24E-19 | 0.3814708 | 0.903 | 0.892 | 3.00E-15 | 2.3 | RASGEF1B  | 1.012331839 |
| RP11-554F20.11  |        | 1.38E-19 | 0.389622  | 0.131 | 0.052 | 3.33E-15 | 2.3 | RP11-554F | 2.519230769 |
| TKTL1           |        | 1.54E-19 | 0.1624343 | 0.032 | 0.005 | 3.72E-15 | 2.3 | TKTL1     | 6.4         |
| ELOVL21         |        | 1.62E-19 | 0.2021723 | 0.045 | 0.01  | 3.91E-15 | 2.3 | ELOVL2    | 4.5         |
| ACADM1          |        | 1.75E-19 | 0.4222012 | 0.173 | 0.081 | 4.21E-15 | 2.3 | ACADM     | 2.135802469 |
| MAPRE12         |        | 1.77E-19 | 0.5543106 | 0.272 | 0.159 | 4.28E-15 | 2.3 | MAPRE1    | 1.710691824 |
| JUNB1           |        | 1.78E-19 | 0.6649096 | 0.105 | 0.038 | 4.29E-15 | 2.3 | JUNB      | 2.763157895 |
| RBFOX24         |        | 1.95E-19 | 0.3690892 | 0.954 | 0.952 | 4.71E-15 | 2.3 | RBFOX2    | 1.00210084  |
| HNRNPK3         |        | 2.32E-19 | 0.5348702 | 0.555 | 0.447 | 5.59E-15 | 2.3 | HNRNPK    | 1.241610738 |
| RP5-1085F17.4   |        | 2.41E-19 | 0.3267485 | 0.093 | 0.032 | 5.82E-15 | 2.3 | RP5-1085F | 2.90625     |
| C3orf141        |        | 2.69E-19 | 0.4756773 | 0.213 | 0.111 | 6.48E-15 | 2.3 | C3orf14   | 1.918918919 |
| RP11-60A24.3    |        | 2.71E-19 | 0.1385563 | 0.037 | 0.007 | 6.53E-15 | 2.3 | RP11-60A2 | 5.285714286 |
| KLRD11          |        | 3.14E-19 | 0.449617  | 0.281 | 0.16  | 7.57E-15 | 2.3 | KLRD1     | 1.75625     |
| TCEAL42         |        | 3.19E-19 | 0.606394  | 0.341 | 0.223 | 7.70E-15 | 2.3 | TCEAL4    | 1.529147982 |
| AC092620.32     |        | 3.67E-19 | 0.1419807 | 0.041 | 0.008 | 8.86E-15 | 2.3 | AC092620  | 5.125       |
| TMEM2302        |        | 4.01E-19 | 0.4221971 | 0.178 | 0.086 | 9.67E-15 | 2.3 | TMEM230   | 2.069767442 |
| MEP1B2          |        | 4.09E-19 | 0.1845979 | 0.034 | 0.006 | 9.86E-15 | 2.3 | MEP1B     | 5.666666667 |
| S100A142        |        | 4.18E-19 | 0.3329778 | 0.815 | 0.732 | 1.01E-14 | 2.3 | S100A14   | 1.113387978 |
| GSTM42          |        | 4.18E-19 | 0.1447805 | 0.041 | 0.008 | 1.01E-14 | 2.3 | GSTM4     | 5.125       |
| CDH16           |        | 4.65E-19 | 0.4086551 | 0.701 | 0.604 | 1.12E-14 | 2.3 | CDH1      | 1.160596026 |
| ACAA21          |        | 5.10E-19 | 0.2426158 | 0.096 | 0.033 | 1.23E-14 | 2.3 | ACAA2     | 2.909090909 |
| NR1H41          |        | 5.15E-19 | 0.1828423 | 0.052 | 0.012 | 1.24E-14 | 2.3 | NR1H4     | 4.333333333 |
| RPS295          |        | 5.45E-19 | 0.3155827 | 0.92  | 0.925 | 1.32E-14 | 2.3 | RPS29     | 0.994594595 |
| LMOD21          |        | 6.93E-19 | 0.1287079 | 0.025 | 0.003 | 1.67E-14 | 2.3 | LMOD2     | 8.333333333 |
| RP11-434D9.1    |        | 7.12E-19 | 0.3378913 | 0.084 | 0.028 | 1.72E-14 | 2.3 | RP11-434D | 3           |
| USP201          |        | 7.86E-19 | 0.2582374 | 0.067 | 0.019 | 1.89E-14 | 2.3 | USP20     | 3.526315789 |
| CTNS1           |        | 8.02E-19 | 0.1766381 | 0.059 | 0.016 | 1.93E-14 | 2.3 | CTNS      | 3.6875      |
| RCL12           |        | 9.71E-19 | 0.5036224 | 0.15  | 0.068 | 2.34E-14 | 2.3 | RCL1      | 2.205882353 |
| SERPINA112      |        | 1.04E-18 | 0.2626695 | 0.096 | 0.034 | 2.52E-14 | 2.3 | SERPINA11 | 2.823529412 |
| YWHAE2          |        | 1.05E-18 | 0.4201154 | 0.721 | 0.626 | 2.53E-14 | 2.3 | YWHAE     | 1.151757188 |
| RPL37A6         |        | 1.11E-18 | 0.2757272 | 0.98  | 0.975 | 2.67E-14 | 2.3 | RPL37A    | 1.005128205 |
| MIR4458HG1      |        | 1.13E-18 | 0.3576634 | 0.149 | 0.066 | 2.71E-14 | 2.3 | MIR4458H  | 2.257575758 |
| DENND2C1        |        | 1.13E-18 | 0.3376979 | 0.097 | 0.034 | 2.73E-14 | 2.3 | DENND2C   | 2.852941176 |
| SYT2            |        | 1.22E-18 | 0.1338111 | 0.045 | 0.01  | 2.94E-14 | 2.3 | SYT2      | 4.5         |
| RP11-227G15.121 |        | 1.27E-18 | 0.1445773 | 0.037 | 0.007 | 3.07E-14 | 2.3 | RP11-227G | 5.285714286 |

|                |          |           |       |       |          |     |            |             |
|----------------|----------|-----------|-------|-------|----------|-----|------------|-------------|
| NIT2           | 1.34E-18 | 0.4529449 | 0.201 | 0.104 | 3.23E-14 | 2.3 | NIT2       | 1.932692308 |
| UGDH-AS12      | 1.39E-18 | 0.6476879 | 0.206 | 0.108 | 3.36E-14 | 2.3 | UGDH-AS1   | 1.907407407 |
| C12orf652      | 1.51E-18 | 0.498326  | 0.125 | 0.052 | 3.63E-14 | 2.3 | C12orf65   | 2.403846154 |
| SHOC21         | 1.97E-18 | 0.5480205 | 0.376 | 0.257 | 4.76E-14 | 2.3 | SHOC2      | 1.463035019 |
| MGST24         | 1.99E-18 | 0.488598  | 0.263 | 0.152 | 4.81E-14 | 2.3 | MGST2      | 1.730263158 |
| PDK42          | 2.05E-18 | 0.4712234 | 0.166 | 0.078 | 4.94E-14 | 2.3 | PDK4       | 2.128205128 |
| MMRN2          | 2.14E-18 | 0.2232081 | 0.059 | 0.016 | 5.16E-14 | 2.3 | MMRN2      | 3.6875      |
| ADK1           | 2.28E-18 | 0.660445  | 0.574 | 0.48  | 5.49E-14 | 2.3 | ADK        | 1.195833333 |
| C2CD4A2        | 2.35E-18 | 0.3587916 | 0.118 | 0.047 | 5.66E-14 | 2.3 | C2CD4A     | 2.510638298 |
| COQ31          | 2.38E-18 | 0.2432242 | 0.073 | 0.022 | 5.74E-14 | 2.3 | COQ3       | 3.318181818 |
| REL2           | 2.40E-18 | 0.4830421 | 0.43  | 0.297 | 5.78E-14 | 2.3 | REL        | 1.447811448 |
| RP11-115N4.1   | 2.44E-18 | 0.1233677 | 0.024 | 0.003 | 5.90E-14 | 2.3 | RP11-115N  | 8           |
| CCR61          | 2.75E-18 | 0.1414045 | 0.024 | 0.003 | 6.62E-14 | 2.3 | CCR6       | 8           |
| LDLR3          | 3.05E-18 | 0.5419086 | 0.278 | 0.168 | 7.36E-14 | 2.3 | LDLR       | 1.654761905 |
| H2AFZ          | 3.33E-18 | 0.6110856 | 0.733 | 0.669 | 8.02E-14 | 2.3 | H2AFZ      | 1.095665172 |
| METTL24        | 3.64E-18 | 0.1515163 | 0.021 | 0.003 | 8.77E-14 | 2.3 | METTL24    | 7           |
| RSRC23         | 4.01E-18 | 0.5027215 | 0.688 | 0.624 | 9.66E-14 | 2.3 | RSRC2      | 1.102564103 |
| CLDN83         | 4.72E-18 | 0.4367518 | 0.129 | 0.055 | 1.14E-13 | 2.3 | CLDN8      | 2.345454545 |
| SLC45A1        | 4.95E-18 | 0.1040443 | 0.022 | 0.003 | 1.19E-13 | 2.3 | SLC45A1    | 7.333333333 |
| SPAG93         | 4.97E-18 | 0.5852058 | 0.459 | 0.343 | 1.20E-13 | 2.3 | SPAG9      | 1.33819242  |
| DECR12         | 5.32E-18 | 0.4764218 | 0.265 | 0.156 | 1.28E-13 | 2.3 | DECR1      | 1.698717949 |
| WDR351         | 5.76E-18 | 0.2811861 | 0.076 | 0.024 | 1.39E-13 | 2.3 | WDR35      | 3.166666667 |
| EIF11          | 6.57E-18 | 0.4332291 | 0.596 | 0.478 | 1.58E-13 | 2.3 | EIF1       | 1.246861925 |
| AC005355.11    | 7.69E-18 | 0.1521099 | 0.041 | 0.009 | 1.85E-13 | 2.3 | AC005355.  | 4.555555556 |
| SCGB1D22       | 7.86E-18 | 0.5233435 | 0.222 | 0.117 | 1.90E-13 | 2.3 | SCGB1D2    | 1.897435897 |
| PILRA          | 8.67E-18 | 0.2584481 | 0.072 | 0.022 | 2.09E-13 | 2.3 | PILRA      | 3.272727273 |
| LINC006071     | 9.21E-18 | 0.3719765 | 0.1   | 0.037 | 2.22E-13 | 2.3 | LINC00607  | 2.702702703 |
| HIST1H2BE      | 1.14E-17 | 0.230235  | 0.069 | 0.021 | 2.75E-13 | 2.3 | HIST1H2BE  | 3.285714286 |
| NEK10          | 1.22E-17 | 0.5016687 | 0.256 | 0.149 | 2.93E-13 | 2.3 | NEK10      | 1.718120805 |
| TESK21         | 1.27E-17 | 0.5149772 | 0.249 | 0.143 | 3.07E-13 | 2.3 | TESK2      | 1.741258741 |
| ATP5G24        | 1.29E-17 | 0.3650837 | 0.801 | 0.736 | 3.11E-13 | 2.3 | ATP5G2     | 1.088315217 |
| ADAMTS41       | 1.35E-17 | 0.3280724 | 0.121 | 0.05  | 3.25E-13 | 2.3 | ADAMTS4    | 2.42        |
| BZW1           | 1.39E-17 | 0.5150333 | 0.393 | 0.275 | 3.35E-13 | 2.3 | BZW1       | 1.429090909 |
| CTD-2192J16.26 | 1.41E-17 | 0.1257277 | 0.025 | 0.004 | 3.39E-13 | 2.3 | CTD-2192J: | 6.25        |
| HSH2D          | 1.64E-17 | 0.1060034 | 0.027 | 0.004 | 3.95E-13 | 2.3 | HSH2D      | 6.75        |
| ZBTB182        | 1.70E-17 | 0.4021287 | 0.153 | 0.071 | 4.10E-13 | 2.3 | ZBTB18     | 2.154929577 |
| ITGB1BP1       | 1.71E-17 | 0.2388184 | 0.081 | 0.027 | 4.12E-13 | 2.3 | ITGB1BP1   | 3           |
| CDK191         | 1.71E-17 | 0.5684297 | 0.428 | 0.317 | 4.13E-13 | 2.3 | CDK19      | 1.350157729 |
| CDH171         | 1.96E-17 | 0.1142018 | 0.022 | 0.003 | 4.72E-13 | 2.3 | CDH17      | 7.333333333 |
| RP4-593C16.41  | 2.10E-17 | 0.1299285 | 0.035 | 0.007 | 5.07E-13 | 2.3 | RP4-593C1  | 5           |
| SPA171         | 2.20E-17 | 0.2879891 | 0.097 | 0.036 | 5.32E-13 | 2.3 | SPA17      | 2.694444444 |
| B3GALNT12      | 2.67E-17 | 0.1508946 | 0.049 | 0.012 | 6.44E-13 | 2.3 | B3GALNT1   | 4.083333333 |
| ATL1           | 3.49E-17 | 0.3290417 | 0.133 | 0.058 | 8.41E-13 | 2.3 | ATL1       | 2.293103448 |
| SIK11          | 3.82E-17 | 0.1479719 | 0.035 | 0.007 | 9.20E-13 | 2.3 | SIK1       | 5           |
| KLF54          | 3.95E-17 | 0.5229222 | 0.272 | 0.162 | 9.53E-13 | 2.3 | KLF5       | 1.679012346 |
| MAN1A11        | 3.96E-17 | 0.5215461 | 0.343 | 0.226 | 9.56E-13 | 2.3 | MAN1A1     | 1.517699115 |
| MYL12A1        | 4.30E-17 | 0.3037548 | 0.909 | 0.866 | 1.04E-12 | 2.3 | MYL12A     | 1.04965358  |
| FTO2           | 5.23E-17 | 0.5302789 | 0.368 | 0.252 | 1.26E-12 | 2.3 | FTO        | 1.46031746  |
| RPL385         | 5.54E-17 | 0.29913   | 0.921 | 0.891 | 1.34E-12 | 2.3 | RPL38      | 1.033670034 |
| TMPRSS9        | 5.68E-17 | 0.2626671 | 0.056 | 0.015 | 1.37E-12 | 2.3 | TMPRSS9    | 3.733333333 |
| ERLIN21        | 5.76E-17 | 0.3320187 | 0.111 | 0.045 | 1.39E-12 | 2.3 | ERLIN2     | 2.466666667 |
| EID11          | 5.91E-17 | 0.4260415 | 0.162 | 0.079 | 1.42E-12 | 2.3 | EID1       | 2.050632911 |

|               |          |           |       |       |          |     |            |             |
|---------------|----------|-----------|-------|-------|----------|-----|------------|-------------|
| TGFB31        | 6.10E-17 | 0.2359715 | 0.097 | 0.036 | 1.47E-12 | 2.3 | TGFB3      | 2.694444444 |
| PKD2L2        | 6.21E-17 | 0.1978402 | 0.072 | 0.023 | 1.50E-12 | 2.3 | PKD2L2     | 3.130434783 |
| ATP6V1G12     | 6.71E-17 | 0.532171  | 0.483 | 0.388 | 1.62E-12 | 2.3 | ATP6V1G1   | 1.244845361 |
| ARID4A2       | 6.72E-17 | 0.6383759 | 0.289 | 0.185 | 1.62E-12 | 2.3 | ARID4A     | 1.562162162 |
| PEBP12        | 7.32E-17 | 0.4583273 | 0.278 | 0.171 | 1.77E-12 | 2.3 | PEBP1      | 1.625730994 |
| CHMP31        | 7.78E-17 | 0.3935542 | 0.16  | 0.078 | 1.88E-12 | 2.3 | CHMP3      | 2.051282051 |
| ZFP361        | 8.16E-17 | 0.7129153 | 0.209 | 0.115 | 1.97E-12 | 2.3 | ZFP36      | 1.817391304 |
| RP11-761B3.1  | 8.45E-17 | 0.1641272 | 0.059 | 0.017 | 2.04E-12 | 2.3 | RP11-761B  | 3.470588235 |
| LINC012712    | 8.88E-17 | 0.3129256 | 0.053 | 0.014 | 2.14E-12 | 2.3 | LINC01271  | 3.785714286 |
| SYT11         | 9.29E-17 | 0.2331808 | 0.074 | 0.024 | 2.24E-12 | 2.3 | SYT1       | 3.083333333 |
| MAP4K2        | 9.74E-17 | 0.137514  | 0.035 | 0.007 | 2.35E-12 | 2.3 | MAP4K2     | 5           |
| RP11-364L4.31 | 1.12E-16 | 0.2599243 | 0.034 | 0.007 | 2.70E-12 | 2.3 | RP11-364L4 | 4.857142857 |
| SMARCA22      | 1.13E-16 | 0.6043701 | 0.412 | 0.308 | 2.71E-12 | 2.3 | SMARCA2    | 1.337662338 |
| MN11          | 1.16E-16 | 0.1859973 | 0.051 | 0.013 | 2.80E-12 | 2.3 | MN1        | 3.923076923 |
| ACOT132       | 1.17E-16 | 0.3798678 | 0.091 | 0.034 | 2.82E-12 | 2.3 | ACOT13     | 2.676470588 |
| SLC9A3R11     | 1.51E-16 | 0.4107873 | 0.181 | 0.094 | 3.63E-12 | 2.3 | SLC9A3R1   | 1.925531915 |
| ST3GAL3       | 1.57E-16 | 0.2941783 | 0.096 | 0.036 | 3.79E-12 | 2.3 | ST3GAL3    | 2.666666667 |
| AC017060.11   | 1.60E-16 | 0.15561   | 0.038 | 0.008 | 3.85E-12 | 2.3 | AC017060.  | 4.75        |
| ALG81         | 1.63E-16 | 0.2927156 | 0.108 | 0.044 | 3.94E-12 | 2.3 | ALG8       | 2.454545455 |
| LSMEM11       | 1.65E-16 | 0.4125558 | 0.149 | 0.069 | 3.98E-12 | 2.3 | LSMEM1     | 2.15942029  |
| KLF4          | 1.73E-16 | 0.3841075 | 0.205 | 0.11  | 4.17E-12 | 2.3 | KLF4       | 1.863636364 |
| NCALD3        | 1.76E-16 | 0.4014549 | 0.226 | 0.126 | 4.24E-12 | 2.3 | NCALD      | 1.793650794 |
| RHEBL11       | 2.21E-16 | 0.1301871 | 0.031 | 0.006 | 5.32E-12 | 2.3 | RHEBL1     | 5.166666667 |
| DYX1C11       | 2.26E-16 | 0.2273482 | 0.074 | 0.025 | 5.46E-12 | 2.3 | DYX1C1     | 2.96        |
| AEBP21        | 2.39E-16 | 0.5581955 | 0.362 | 0.255 | 5.75E-12 | 2.3 | AEBP2      | 1.419607843 |
| CTB-12O2.11   | 2.46E-16 | 0.2845231 | 0.067 | 0.021 | 5.93E-12 | 2.3 | CTB-12O2.  | 3.19047619  |
| C4orf331      | 3.44E-16 | 0.1663243 | 0.052 | 0.014 | 8.30E-12 | 2.3 | C4orf33    | 3.714285714 |
| MPDU1         | 3.63E-16 | 0.2107948 | 0.056 | 0.016 | 8.75E-12 | 2.3 | MPDU1      | 3.5         |
| COL12A11      | 4.20E-16 | 0.3757026 | 0.115 | 0.048 | 1.01E-11 | 2.3 | COL12A1    | 2.395833333 |
| CHAC2         | 4.95E-16 | 0.1240357 | 0.034 | 0.007 | 1.19E-11 | 2.3 | CHAC2      | 4.857142857 |
| LARP1B2       | 5.63E-16 | 0.4534414 | 0.331 | 0.215 | 1.36E-11 | 2.3 | LARP1B     | 1.539534884 |
| TWSG11        | 5.65E-16 | 0.4177935 | 0.16  | 0.08  | 1.36E-11 | 2.3 | TWSG1      | 2           |
| AUNIP         | 5.78E-16 | 0.1035512 | 0.021 | 0.003 | 1.39E-11 | 2.3 | AUNIP      | 7           |
| SLAIN12       | 6.52E-16 | 0.2329    | 0.059 | 0.017 | 1.57E-11 | 2.3 | SLAIN1     | 3.470588235 |
| FLT1          | 7.11E-16 | 0.1613542 | 0.046 | 0.012 | 1.71E-11 | 2.3 | FLT1       | 3.833333333 |
| GABARAP2      | 7.41E-16 | 0.4702915 | 0.476 | 0.359 | 1.79E-11 | 2.3 | GABARAP    | 1.325905292 |
| FYB1          | 7.47E-16 | 0.1860247 | 0.035 | 0.007 | 1.80E-11 | 2.3 | FYB        | 5           |
| CTD-3088G3.83 | 7.50E-16 | 0.374468  | 0.121 | 0.052 | 1.81E-11 | 2.3 | CTD-3088G  | 2.326923077 |
| RP11-739N20.2 | 8.80E-16 | 0.2272314 | 0.072 | 0.024 | 2.12E-11 | 2.3 | RP11-739N  | 3           |
| CASC12        | 9.69E-16 | 0.2728621 | 0.086 | 0.031 | 2.34E-11 | 2.3 | CASC1      | 2.774193548 |
| AHCY1         | 1.08E-15 | 0.3259362 | 0.128 | 0.058 | 2.61E-11 | 2.3 | AHCY       | 2.206896552 |
| ANKRD501      | 1.14E-15 | 0.4134079 | 0.162 | 0.081 | 2.76E-11 | 2.3 | ANKRD50    | 2           |
| ZNF6891       | 1.22E-15 | 0.2510063 | 0.052 | 0.014 | 2.94E-11 | 2.3 | ZNF689     | 3.714285714 |
| RNF112        | 1.27E-15 | 0.4120032 | 0.357 | 0.244 | 3.07E-11 | 2.3 | RNF11      | 1.463114754 |
| CAPN12        | 1.38E-15 | 0.1201825 | 0.027 | 0.005 | 3.32E-11 | 2.3 | CAPN12     | 5.4         |
| BCAS4         | 1.39E-15 | 0.2460434 | 0.083 | 0.03  | 3.34E-11 | 2.3 | BCAS4      | 2.766666667 |
| NCAPG2        | 1.51E-15 | 0.1950933 | 0.062 | 0.019 | 3.63E-11 | 2.3 | NCAPG2     | 3.263157895 |
| AC142293.32   | 1.53E-15 | 0.1511902 | 0.038 | 0.008 | 3.69E-11 | 2.3 | AC142293.  | 4.75        |
| POLR2K1       | 1.62E-15 | 0.4484021 | 0.475 | 0.367 | 3.91E-11 | 2.3 | POLR2K     | 1.294277929 |
| TGIF11        | 1.71E-15 | 0.4562052 | 0.329 | 0.218 | 4.12E-11 | 2.3 | TGIF1      | 1.509174312 |
| MT1A2         | 1.71E-15 | 0.2377779 | 0.056 | 0.016 | 4.12E-11 | 2.3 | MT1A       | 3.5         |
| TMEM2542      | 2.12E-15 | 0.2550905 | 0.104 | 0.042 | 5.10E-11 | 2.3 | TMEM254    | 2.476190476 |

|                 |          |           |       |       |          |     |              |             |
|-----------------|----------|-----------|-------|-------|----------|-----|--------------|-------------|
| RP11-813I20.21  | 2.12E-15 | 0.2034212 | 0.069 | 0.023 | 5.12E-11 | 2.3 | RP11-813I2   | 3           |
| ORMDL22         | 2.30E-15 | 0.4394311 | 0.258 | 0.159 | 5.54E-11 | 2.3 | ORMDL2       | 1.622641509 |
| MUC61           | 2.30E-15 | 0.1045582 | 0.021 | 0.003 | 5.55E-11 | 2.3 | MUC6         | 7           |
| CD832           | 2.40E-15 | 0.2866576 | 0.142 | 0.067 | 5.79E-11 | 2.3 | CD83         | 2.119402985 |
| MED132          | 2.65E-15 | 0.5519343 | 0.493 | 0.397 | 6.39E-11 | 2.3 | MED13        | 1.241813602 |
| AZIN1-AS1       | 2.84E-15 | 0.3623357 | 0.117 | 0.051 | 6.84E-11 | 2.3 | AZIN1-AS1    | 2.294117647 |
| WNT9A1          | 3.00E-15 | 0.3658341 | 0.081 | 0.03  | 7.24E-11 | 2.3 | WNT9A        | 2.7         |
| S100A161        | 3.08E-15 | 0.4315764 | 0.254 | 0.153 | 7.42E-11 | 2.3 | S100A16      | 1.660130719 |
| ELAVL2          | 3.22E-15 | 0.1182622 | 0.027 | 0.005 | 7.77E-11 | 2.3 | ELAVL2       | 5.4         |
| ANKRD35         | 3.28E-15 | 0.107843  | 0.031 | 0.006 | 7.91E-11 | 2.3 | ANKRD35      | 5.166666667 |
| LMCD1-AS11      | 3.47E-15 | 0.3243269 | 0.107 | 0.045 | 8.37E-11 | 2.3 | LMCD1-AS1    | 2.377777778 |
| RP11-60I3.42    | 4.24E-15 | 0.2155203 | 0.07  | 0.024 | 1.02E-10 | 2.3 | RP11-60I3.4  | 2.916666667 |
| PECAM1          | 4.37E-15 | 0.1553045 | 0.041 | 0.01  | 1.05E-10 | 2.3 | PECAM1       | 4.1         |
| VEZF1           | 4.56E-15 | 0.3954702 | 0.178 | 0.095 | 1.10E-10 | 2.3 | VEZF1        | 1.873684211 |
| SPTAN11         | 5.00E-15 | 0.5229136 | 0.326 | 0.22  | 1.21E-10 | 2.3 | SPTAN1       | 1.481818182 |
| HPGD2           | 5.71E-15 | 0.1391264 | 0.044 | 0.011 | 1.38E-10 | 2.3 | HPGD         | 4           |
| RP11-879F14.1   | 6.01E-15 | 0.1447344 | 0.038 | 0.009 | 1.45E-10 | 2.3 | RP11-879F14  | 4.222222222 |
| LNP11           | 6.09E-15 | 0.1084209 | 0.031 | 0.006 | 1.47E-10 | 2.3 | LNP1         | 5.166666667 |
| IDH13           | 6.87E-15 | 0.4212596 | 0.156 | 0.08  | 1.66E-10 | 2.3 | IDH1         | 1.95        |
| RAN3            | 6.91E-15 | 0.4280162 | 0.614 | 0.527 | 1.67E-10 | 2.3 | RAN          | 1.165085389 |
| NR2C11          | 7.82E-15 | 0.2977539 | 0.129 | 0.059 | 1.88E-10 | 2.3 | NR2C1        | 2.186440678 |
| BTG21           | 7.95E-15 | 0.6320477 | 0.128 | 0.06  | 1.92E-10 | 2.3 | BTG2         | 2.133333333 |
| VWA9            | 7.98E-15 | 0.2450848 | 0.072 | 0.025 | 1.93E-10 | 2.3 | VWA9         | 2.88        |
| SH2D4B          | 8.33E-15 | 0.1062908 | 0.024 | 0.004 | 2.01E-10 | 2.3 | SH2D4B       | 6           |
| FLT32           | 8.86E-15 | 0.4585626 | 0.09  | 0.035 | 2.14E-10 | 2.3 | FLT3         | 2.571428571 |
| ARPC32          | 9.97E-15 | 0.4002704 | 0.712 | 0.66  | 2.40E-10 | 2.3 | ARPC3        | 1.078787879 |
| SCOC3           | 1.00E-14 | 0.4853133 | 0.337 | 0.238 | 2.42E-10 | 2.3 | SCOC         | 1.415966387 |
| UBXN82          | 1.07E-14 | 0.2682917 | 0.069 | 0.023 | 2.57E-10 | 2.3 | UBXN8        | 3           |
| ATOX12          | 1.15E-14 | 0.3940237 | 0.17  | 0.09  | 2.78E-10 | 2.3 | ATOX1        | 1.888888889 |
| RP1-313I6.121   | 1.24E-14 | 0.3786798 | 0.178 | 0.095 | 2.99E-10 | 2.3 | RP1-313I6.1  | 1.873684211 |
| TXNDC171        | 1.29E-14 | 0.3476048 | 0.14  | 0.068 | 3.10E-10 | 2.3 | TXNDC17      | 2.058823529 |
| RAB302          | 1.30E-14 | 0.4204451 | 0.212 | 0.12  | 3.14E-10 | 2.3 | RAB30        | 1.766666667 |
| RP11-894P9.2    | 1.50E-14 | 0.1174156 | 0.017 | 0.002 | 3.62E-10 | 2.3 | RP11-894P9.2 | 8.5         |
| LINC007042      | 1.60E-14 | 0.2646373 | 0.076 | 0.027 | 3.87E-10 | 2.3 | LINC00704    | 2.814814815 |
| FAT1            | 1.82E-14 | 0.5230212 | 0.302 | 0.2   | 4.40E-10 | 2.3 | FAT1         | 1.51        |
| COX18           | 1.86E-14 | 0.2083951 | 0.056 | 0.017 | 4.48E-10 | 2.3 | COX18        | 3.294117647 |
| NUCB11          | 2.01E-14 | 0.2444398 | 0.073 | 0.026 | 4.86E-10 | 2.3 | NUCB1        | 2.807692308 |
| RABEPK          | 2.04E-14 | 0.1996672 | 0.056 | 0.017 | 4.91E-10 | 2.3 | RABEPK       | 3.294117647 |
| FGF121          | 2.12E-14 | 0.2870495 | 0.077 | 0.028 | 5.12E-10 | 2.3 | FGF12        | 2.75        |
| PTP4A1          | 2.13E-14 | 0.531019  | 0.386 | 0.282 | 5.14E-10 | 2.3 | PTP4A1       | 1.368794326 |
| RP11-277P12.203 | 2.20E-14 | 0.383283  | 0.139 | 0.067 | 5.30E-10 | 2.3 | RP11-277P12  | 2.074626866 |
| MSMO12          | 2.23E-14 | 0.5329002 | 0.445 | 0.331 | 5.37E-10 | 2.3 | MSMO1        | 1.344410876 |
| RP11-613M10.91  | 2.28E-14 | 0.3799895 | 0.145 | 0.071 | 5.49E-10 | 2.3 | RP11-613M10  | 2.042253521 |
| C9orf241        | 2.31E-14 | 0.1963506 | 0.059 | 0.018 | 5.57E-10 | 2.3 | C9orf24      | 3.277777778 |
| LAPTM4A2        | 2.50E-14 | 0.4232367 | 0.435 | 0.326 | 6.04E-10 | 2.3 | LAPTM4A      | 1.334355828 |
| PFDN13          | 2.54E-14 | 0.5279077 | 0.317 | 0.22  | 6.13E-10 | 2.3 | PFDN1        | 1.440909091 |
| PSMA42          | 2.72E-14 | 0.469397  | 0.528 | 0.438 | 6.56E-10 | 2.3 | PSMA4        | 1.205479452 |
| ARL6IP53        | 2.77E-14 | 0.4599626 | 0.567 | 0.487 | 6.69E-10 | 2.3 | ARL6IP5      | 1.164271047 |
| DNAJB92         | 2.79E-14 | 0.3750163 | 0.169 | 0.089 | 6.74E-10 | 2.3 | DNAJB9       | 1.898876404 |
| CRKL1           | 2.89E-14 | 0.3416148 | 0.152 | 0.076 | 6.96E-10 | 2.3 | CRKL         | 2           |
| ERBB2IP2        | 2.95E-14 | 0.3833666 | 0.531 | 0.426 | 7.11E-10 | 2.3 | ERBB2IP      | 1.246478873 |
| SLC28A12        | 3.18E-14 | 0.2086643 | 0.058 | 0.018 | 7.67E-10 | 2.3 | SLC28A1      | 3.222222222 |



|                |          |           |       |       |          |     |            |             |
|----------------|----------|-----------|-------|-------|----------|-----|------------|-------------|
| SKA3           | 3.22E-14 | 0.1253799 | 0.017 | 0.002 | 7.76E-10 | 2.3 | SKA3       | 8.5         |
| LFNG1          | 3.33E-14 | 0.1017913 | 0.024 | 0.004 | 8.02E-10 | 2.3 | LFNG       | 6           |
| ARSD1          | 3.90E-14 | 0.2951336 | 0.11  | 0.048 | 9.40E-10 | 2.3 | ARSD       | 2.291666667 |
| HYPK           | 3.97E-14 | 0.1663801 | 0.044 | 0.011 | 9.57E-10 | 2.3 | HYPK       | 4           |
| CUEDC1         | 4.01E-14 | 0.3498324 | 0.135 | 0.066 | 9.67E-10 | 2.3 | CUEDC1     | 2.045454545 |
| C5AR1          | 4.06E-14 | 0.1076182 | 0.027 | 0.005 | 9.78E-10 | 2.3 | C5AR1      | 5.4         |
| DNAJB11        | 4.44E-14 | 0.4638263 | 0.204 | 0.118 | 1.07E-09 | 2.3 | DNAJB1     | 1.728813559 |
| EIF5A2         | 4.59E-14 | 0.3552478 | 0.17  | 0.09  | 1.11E-09 | 2.3 | EIF5A      | 1.888888889 |
| RTN43          | 5.09E-14 | 0.3506365 | 0.711 | 0.653 | 1.23E-09 | 2.3 | RTN4       | 1.088820827 |
| TAOK31         | 5.46E-14 | 0.5176721 | 0.552 | 0.472 | 1.32E-09 | 2.3 | TAOK3      | 1.169491525 |
| RGMB           | 5.91E-14 | 0.2886696 | 0.094 | 0.039 | 1.43E-09 | 2.3 | RGMB       | 2.41025641  |
| RERE2          | 6.06E-14 | 0.4811884 | 0.64  | 0.569 | 1.46E-09 | 2.3 | RERE       | 1.124780316 |
| AC108938.5     | 6.70E-14 | 0.3819964 | 0.035 | 0.008 | 1.61E-09 | 2.3 | AC108938.  | 4.375       |
| IGFBP22        | 8.13E-14 | 0.2733673 | 0.11  | 0.048 | 1.96E-09 | 2.3 | IGFBP2     | 2.291666667 |
| CD592          | 8.83E-14 | 0.3228735 | 0.921 | 0.881 | 2.13E-09 | 2.3 | CD59       | 1.045402951 |
| AC116366.61    | 9.49E-14 | 0.1552022 | 0.035 | 0.008 | 2.29E-09 | 2.3 | AC116366.  | 4.375       |
| NCKAP5L        | 9.89E-14 | 0.1495145 | 0.039 | 0.01  | 2.38E-09 | 2.3 | NCKAP5L    | 3.9         |
| CBX4           | 1.02E-13 | 0.2110163 | 0.053 | 0.016 | 2.47E-09 | 2.3 | CBX4       | 3.3125      |
| PARD6B1        | 1.06E-13 | 0.488609  | 0.274 | 0.179 | 2.56E-09 | 2.3 | PARD6B     | 1.530726257 |
| IKZF4          | 1.06E-13 | 0.1747266 | 0.046 | 0.013 | 2.56E-09 | 2.3 | IKZF4      | 3.538461538 |
| GPR1371        | 1.07E-13 | 0.2490666 | 0.032 | 0.007 | 2.58E-09 | 2.3 | GPR137     | 4.571428571 |
| IMPG11         | 1.08E-13 | 0.1370627 | 0.031 | 0.007 | 2.60E-09 | 2.3 | IMPG1      | 4.428571429 |
| ADAM18         | 1.09E-13 | 0.1241652 | 0.032 | 0.007 | 2.64E-09 | 2.3 | ADAM18     | 4.571428571 |
| LINC012851     | 1.12E-13 | 0.1444553 | 0.029 | 0.006 | 2.69E-09 | 2.3 | LINC01285  | 4.833333333 |
| LINC01088      | 1.12E-13 | 0.1272365 | 0.027 | 0.005 | 2.70E-09 | 2.3 | LINC01088  | 5.4         |
| CAT2           | 1.15E-13 | 0.3050261 | 0.112 | 0.051 | 2.78E-09 | 2.3 | CAT        | 2.196078431 |
| SH3BP41        | 1.18E-13 | 0.4149467 | 0.253 | 0.157 | 2.84E-09 | 2.3 | SH3BP4     | 1.611464968 |
| PXDNL1         | 1.43E-13 | 0.2782895 | 0.088 | 0.036 | 3.45E-09 | 2.3 | PXDNL      | 2.444444444 |
| MRPL512        | 1.44E-13 | 0.4583188 | 0.51  | 0.433 | 3.48E-09 | 2.3 | MRPL51     | 1.177829099 |
| PHYHD1         | 1.47E-13 | 0.1650022 | 0.037 | 0.009 | 3.55E-09 | 2.3 | PHYHD1     | 4.111111111 |
| CMBL2          | 1.50E-13 | 0.1901266 | 0.066 | 0.023 | 3.61E-09 | 2.3 | CMBL       | 2.869565217 |
| MALAT12        | 1.59E-13 | 0.1333854 | 1     | 1     | 3.83E-09 | 2.3 | MALAT1     | 1           |
| PAK1IP12       | 1.59E-13 | 0.2226849 | 0.072 | 0.026 | 3.84E-09 | 2.3 | PAK1IP1    | 2.769230769 |
| TMEM14A2       | 1.61E-13 | 0.3344795 | 0.122 | 0.058 | 3.89E-09 | 2.3 | TMEM14A    | 2.103448276 |
| FER1L6-AS21    | 1.68E-13 | 0.1220067 | 0.027 | 0.005 | 4.05E-09 | 2.3 | FER1L6-AS. | 5.4         |
| RUVBL2         | 1.79E-13 | 0.2857027 | 0.105 | 0.046 | 4.31E-09 | 2.3 | RUVBL2     | 2.282608696 |
| RP11-479G22.8  | 1.81E-13 | 0.1328509 | 0.025 | 0.005 | 4.37E-09 | 2.3 | RP11-479G  | 5           |
| F11-AS1        | 1.91E-13 | 0.1314479 | 0.028 | 0.006 | 4.59E-09 | 2.3 | F11-AS1    | 4.666666667 |
| UQCC22         | 2.03E-13 | 0.2931093 | 0.115 | 0.053 | 4.90E-09 | 2.3 | UQCC2      | 2.169811321 |
| COX171         | 2.05E-13 | 0.2834971 | 0.129 | 0.062 | 4.95E-09 | 2.3 | COX17      | 2.080645161 |
| RP11-114H23.12 | 2.21E-13 | 0.344995  | 0.187 | 0.104 | 5.32E-09 | 2.3 | RP11-114H  | 1.798076923 |
| GLB1L          | 2.54E-13 | 0.2006763 | 0.044 | 0.012 | 6.11E-09 | 2.3 | GLB1L      | 3.666666667 |
| AC104820.2     | 2.70E-13 | 0.1251527 | 0.028 | 0.006 | 6.51E-09 | 2.3 | AC104820.  | 4.666666667 |
| ATP6AP22       | 3.15E-13 | 0.4090038 | 0.232 | 0.142 | 7.61E-09 | 2.3 | ATP6AP2    | 1.633802817 |
| SYNCRIP1       | 3.17E-13 | 0.4451139 | 0.183 | 0.105 | 7.64E-09 | 2.3 | SYNCRIP    | 1.742857143 |
| ASF1B1         | 3.24E-13 | 0.2129888 | 0.041 | 0.011 | 7.81E-09 | 2.3 | ASF1B      | 3.727272727 |
| BAG12          | 3.28E-13 | 0.3204026 | 0.178 | 0.097 | 7.90E-09 | 2.3 | BAG1       | 1.835051546 |
| IRS12          | 3.32E-13 | 0.3594341 | 0.173 | 0.094 | 8.00E-09 | 2.3 | IRS1       | 1.840425532 |
| MARCKSL11      | 3.35E-13 | 0.3861481 | 0.244 | 0.151 | 8.08E-09 | 2.3 | MARCKSL1   | 1.61589404  |
| USP9X2         | 3.37E-13 | 0.4309768 | 0.496 | 0.404 | 8.11E-09 | 2.3 | USP9X      | 1.227722772 |
| XYLB1          | 3.37E-13 | 0.1671732 | 0.044 | 0.012 | 8.12E-09 | 2.3 | XYLB       | 3.666666667 |
| STIP12         | 3.41E-13 | 0.3135618 | 0.124 | 0.059 | 8.22E-09 | 2.3 | STIP1      | 2.101694915 |

|                |          |           |       |       |          |     |           |             |
|----------------|----------|-----------|-------|-------|----------|-----|-----------|-------------|
| GTF3C62        | 3.52E-13 | 0.292177  | 0.124 | 0.059 | 8.48E-09 | 2.3 | GTF3C6    | 2.101694915 |
| MZF1-AS1       | 3.80E-13 | 0.2549529 | 0.083 | 0.033 | 9.17E-09 | 2.3 | MZF1-AS1  | 2.515151515 |
| NAIP           | 3.92E-13 | 0.3907659 | 0.183 | 0.103 | 9.46E-09 | 2.3 | NAIP      | 1.776699029 |
| PVRL31         | 4.02E-13 | 0.1691692 | 0.046 | 0.013 | 9.70E-09 | 2.3 | PVRL3     | 3.538461538 |
| C4orf321       | 4.02E-13 | 0.4501566 | 0.181 | 0.102 | 9.70E-09 | 2.3 | C4orf32   | 1.774509804 |
| RP3-325F22.5   | 4.29E-13 | 0.1776473 | 0.052 | 0.016 | 1.03E-08 | 2.3 | RP3-325F2 | 3.25        |
| GRK71          | 4.47E-13 | 0.159663  | 0.042 | 0.011 | 1.08E-08 | 2.3 | GRK7      | 3.818181818 |
| PKN1           | 4.67E-13 | 0.2158944 | 0.055 | 0.018 | 1.13E-08 | 2.3 | PKN1      | 3.055555556 |
| GDE11          | 4.96E-13 | 0.4049591 | 0.233 | 0.143 | 1.20E-08 | 2.3 | GDE1      | 1.629370629 |
| MRFAP11        | 4.98E-13 | 0.4720728 | 0.265 | 0.174 | 1.20E-08 | 2.3 | MRFAP1    | 1.522988506 |
| ZBED5-AS13     | 5.26E-13 | 0.2181588 | 0.077 | 0.03  | 1.27E-08 | 2.3 | ZBED5-AS1 | 2.566666667 |
| SIAE2          | 5.48E-13 | 0.2439915 | 0.103 | 0.045 | 1.32E-08 | 2.3 | SIAE      | 2.288888889 |
| KLF7           | 5.60E-13 | 0.4396438 | 0.209 | 0.125 | 1.35E-08 | 2.3 | KLF7      | 1.672       |
| MAOA2          | 5.63E-13 | 0.3080556 | 0.121 | 0.057 | 1.36E-08 | 2.3 | MAOA      | 2.122807018 |
| AK51           | 5.65E-13 | 0.2012174 | 0.073 | 0.027 | 1.36E-08 | 2.3 | AK5       | 2.703703704 |
| DNAJA12        | 5.75E-13 | 0.4613355 | 0.355 | 0.26  | 1.39E-08 | 2.3 | DNAJA1    | 1.365384615 |
| AC007386.41    | 6.73E-13 | 0.1409493 | 0.027 | 0.005 | 1.62E-08 | 2.3 | AC007386  | 5.4         |
| P2RX73         | 6.96E-13 | 0.2129514 | 0.052 | 0.016 | 1.68E-08 | 2.3 | P2RX7     | 3.25        |
| C20orf962      | 8.16E-13 | 0.249034  | 0.091 | 0.039 | 1.97E-08 | 2.3 | C20orf96  | 2.333333333 |
| SUMF21         | 8.42E-13 | 0.3270078 | 0.167 | 0.091 | 2.03E-08 | 2.3 | SUMF2     | 1.835164835 |
| TSPAN81        | 8.50E-13 | 0.1629621 | 0.059 | 0.02  | 2.05E-08 | 2.3 | TSPAN8    | 2.95        |
| TMEM104        | 8.59E-13 | 0.1334322 | 0.029 | 0.006 | 2.07E-08 | 2.3 | TMEM104   | 4.833333333 |
| CHST122        | 8.66E-13 | 0.2266482 | 0.074 | 0.028 | 2.09E-08 | 2.3 | CHST12    | 2.642857143 |
| QPRT2          | 8.71E-13 | 0.1298441 | 0.041 | 0.011 | 2.10E-08 | 2.3 | QPRT      | 3.727272727 |
| SPATA9         | 9.32E-13 | 0.1069498 | 0.024 | 0.004 | 2.25E-08 | 2.3 | SPATA9    | 6           |
| LINC014761     | 9.58E-13 | 0.1873231 | 0.069 | 0.025 | 2.31E-08 | 2.3 | LINC01476 | 2.76        |
| RP3-404K8.21   | 9.69E-13 | 0.1470099 | 0.038 | 0.01  | 2.34E-08 | 2.3 | RP3-404K8 | 3.8         |
| RBM35          | 1.02E-12 | 0.4134841 | 0.501 | 0.405 | 2.47E-08 | 2.3 | RBM3      | 1.237037037 |
| PPM1N          | 1.10E-12 | 0.1870625 | 0.039 | 0.011 | 2.66E-08 | 2.3 | PPM1N     | 3.545454545 |
| LMLN1          | 1.11E-12 | 0.1309439 | 0.045 | 0.013 | 2.69E-08 | 2.3 | LMLN      | 3.461538462 |
| RP11-507B12.12 | 1.13E-12 | 0.2277936 | 0.073 | 0.028 | 2.72E-08 | 2.3 | RP11-507B | 2.607142857 |
| ADIRF2         | 1.16E-12 | 0.3944383 | 0.133 | 0.066 | 2.79E-08 | 2.3 | ADIRF     | 2.015151515 |
| FLNB3          | 1.20E-12 | 0.4064892 | 0.552 | 0.456 | 2.89E-08 | 2.3 | FLNB      | 1.210526316 |
| KLF10          | 1.20E-12 | 0.4758021 | 0.225 | 0.141 | 2.90E-08 | 2.3 | KLF10     | 1.595744681 |
| NOP101         | 1.29E-12 | 0.4193119 | 0.617 | 0.556 | 3.10E-08 | 2.3 | NOP10     | 1.10971223  |
| LSM32          | 1.29E-12 | 0.4746111 | 0.417 | 0.328 | 3.12E-08 | 2.3 | LSM3      | 1.271341463 |
| TMCO31         | 1.44E-12 | 0.4443208 | 0.221 | 0.136 | 3.47E-08 | 2.3 | TMCO3     | 1.625       |
| TMEM1441       | 1.49E-12 | 0.1693641 | 0.052 | 0.017 | 3.60E-08 | 2.3 | TMEM144   | 3.058823529 |
| PDZD82         | 1.63E-12 | 0.3568172 | 0.334 | 0.229 | 3.93E-08 | 2.3 | PDZD8     | 1.458515284 |
| IL12RB21       | 1.65E-12 | 0.1591957 | 0.062 | 0.022 | 3.97E-08 | 2.3 | IL12RB2   | 2.818181818 |
| MXRA81         | 1.65E-12 | 0.1057677 | 0.032 | 0.008 | 3.99E-08 | 2.3 | MXRA8     | 4           |
| HACL1          | 1.67E-12 | 0.3223176 | 0.143 | 0.075 | 4.02E-08 | 2.3 | HACL1     | 1.906666667 |
| TM4SF13        | 1.69E-12 | 0.5109679 | 0.923 | 0.906 | 4.07E-08 | 2.3 | TM4SF1    | 1.018763797 |
| TRAF5          | 1.74E-12 | 0.1989889 | 0.051 | 0.016 | 4.19E-08 | 2.3 | TRAF5     | 3.1875      |
| UGT2B15        | 1.76E-12 | 0.1435415 | 0.031 | 0.007 | 4.24E-08 | 2.3 | UGT2B15   | 4.428571429 |
| CTD-3222D19.21 | 1.87E-12 | 0.1379606 | 0.041 | 0.011 | 4.51E-08 | 2.3 | CTD-3222D | 3.727272727 |
| RMND5A1        | 1.87E-12 | 0.3537201 | 0.181 | 0.103 | 4.51E-08 | 2.3 | RMND5A    | 1.757281553 |
| QSOX12         | 1.88E-12 | 0.3529376 | 0.24  | 0.15  | 4.54E-08 | 2.3 | QSOX1     | 1.6         |
| ARL5A2         | 2.03E-12 | 0.3974352 | 0.18  | 0.103 | 4.89E-08 | 2.3 | ARL5A     | 1.747572816 |
| POLE21         | 2.05E-12 | 0.4907783 | 0.33  | 0.236 | 4.94E-08 | 2.3 | POLE2     | 1.398305085 |
| DUSP162        | 2.34E-12 | 0.3830537 | 0.529 | 0.419 | 5.65E-08 | 2.3 | DUSP16    | 1.262529833 |
| TRAP13         | 2.47E-12 | 0.2130184 | 0.083 | 0.034 | 5.96E-08 | 2.3 | TRAP1     | 2.441176471 |

|                |          |           |          |       |          |          |           |             |     |
|----------------|----------|-----------|----------|-------|----------|----------|-----------|-------------|-----|
| DCXR2          | 2.53E-12 | 0.1453893 | 0.052    | 0.017 | 6.11E-08 | 2.3      | DCXR      | 3.058823529 |     |
| GGT11          | 2.57E-12 | 0.1431352 | 0.028    | 0.006 | 6.20E-08 | 2.3      | GGT1      | 4.666666667 |     |
| ITGB3BP4       | 2.60E-12 | 0.3111302 | 0.147    | 0.078 | 6.27E-08 | 2.3      | ITGB3BP   | 1.884615385 |     |
| TOB21          | 2.62E-12 | 0.3794978 | 0.098    | 0.044 | 6.31E-08 | 2.3      | TOB2      | 2.227272727 |     |
| BACH12         | 2.67E-12 | 0.4923088 | 0.397    | 0.306 | 6.43E-08 | 2.3      | BACH1     | 1.297385621 |     |
| SPTSSB1        | 2.73E-12 | 0.3423073 | 0.164    | 0.089 | 6.59E-08 | 2.3      | SPTSSB    | 1.842696629 |     |
| AASS1          | 2.83E-12 | 0.1644408 | 0.044    | 0.013 | 6.83E-08 | 2.3      | AASS      | 3.384615385 |     |
| VPS294         | 2.93E-12 | 0.4076729 | 0.414    | 0.318 | 7.07E-08 | 2.3      | VPS29     | 1.301886792 |     |
| EPCAM1         | 3.06E-12 | 0.4558258 | 0.299    | 0.211 | 7.38E-08 | 2.3      | EPCAM     | 1.417061611 |     |
| LINC001602     | 3.12E-12 | 0.1401727 | 0.048    | 0.015 | 7.54E-08 | 2.3      | LINC00160 | 3.2         |     |
| SPCS12         | 3.15E-12 | 0.3394657 | 0.156    | 0.085 | 7.58E-08 | 2.3      | SPCS1     | 1.835294118 |     |
|                | Sep-08   | 3.20E-12  | 0.132069 | 0.038 | 0.01     | 7.71E-08 | 2.3       | Sep-08      | 3.8 |
| KCTD19         | 3.27E-12 | 0.1033152 | 0.028    | 0.006 | 7.88E-08 | 2.3      | KCTD19    | 4.666666667 |     |
| ST7            | 3.52E-12 | 0.4383882 | 0.235    | 0.148 | 8.49E-08 | 2.3      | ST7       | 1.587837838 |     |
| RP11-140K17.31 | 3.61E-12 | 0.2149261 | 0.096    | 0.042 | 8.69E-08 | 2.3      | RP11-140K | 2.285714286 |     |
| AR2            | 3.62E-12 | 0.2412184 | 0.256    | 0.158 | 8.72E-08 | 2.3      | AR        | 1.620253165 |     |
| EMC31          | 3.81E-12 | 0.3973739 | 0.327    | 0.235 | 9.20E-08 | 2.3      | EMC3      | 1.391489362 |     |
| YWHAB1         | 3.83E-12 | 0.4626878 | 0.397    | 0.314 | 9.23E-08 | 2.3      | YWHAB     | 1.26433121  |     |
| SUPT5H         | 3.84E-12 | 0.3494176 | 0.157    | 0.086 | 9.27E-08 | 2.3      | SUPT5H    | 1.825581395 |     |
| RP11-178C3.2   | 3.98E-12 | 0.1508833 | 0.037    | 0.01  | 9.61E-08 | 2.3      | RP11-178C | 3.7         |     |
| TM4SF181       | 4.08E-12 | 0.3714396 | 0.162    | 0.09  | 9.84E-08 | 2.3      | TM4SF18   | 1.8         |     |
| CFAP1612       | 4.14E-12 | 0.2707836 | 0.088    | 0.038 | 9.97E-08 | 2.3      | CFAP161   | 2.315789474 |     |
| ZNF2512        | 4.31E-12 | 0.2612933 | 0.086    | 0.036 | 1.04E-07 | 2.3      | ZNF251    | 2.388888889 |     |
| RP11-384F7.22  | 4.36E-12 | 0.2258359 | 0.126    | 0.062 | 1.05E-07 | 2.3      | RP11-384F | 2.032258065 |     |
| KLC4           | 4.70E-12 | 0.224223  | 0.07     | 0.027 | 1.13E-07 | 2.3      | KLC4      | 2.592592593 |     |
| ATP2A21        | 5.08E-12 | 0.4772852 | 0.354    | 0.263 | 1.23E-07 | 2.3      | ATP2A2    | 1.346007605 |     |
| GLS3           | 5.60E-12 | 0.452473  | 0.288    | 0.197 | 1.35E-07 | 2.3      | GLS       | 1.461928934 |     |
| RPF11          | 6.52E-12 | 0.3736828 | 0.14     | 0.075 | 1.57E-07 | 2.3      | RPF1      | 1.866666667 |     |
| SERTAD1        | 7.30E-12 | 0.1795816 | 0.048    | 0.015 | 1.76E-07 | 2.3      | SERTAD1   | 3.2         |     |
| PLAT2          | 7.31E-12 | 0.3656977 | 0.159    | 0.086 | 1.76E-07 | 2.3      | PLAT      | 1.848837209 |     |
| IRX51          | 7.51E-12 | 0.2538838 | 0.079    | 0.032 | 1.81E-07 | 2.3      | IRX5      | 2.46875     |     |
| GMNN2          | 7.94E-12 | 0.2304696 | 0.053    | 0.018 | 1.92E-07 | 2.3      | GMNN      | 2.944444444 |     |
| RP11-69E11.41  | 8.07E-12 | 0.1275047 | 0.032    | 0.008 | 1.95E-07 | 2.3      | RP11-69E1 | 4           |     |
| SCN9A2         | 8.12E-12 | 0.1262238 | 0.038    | 0.01  | 1.96E-07 | 2.3      | SCN9A     | 3.8         |     |
| ITM2B2         | 8.14E-12 | 0.4204872 | 0.435    | 0.349 | 1.96E-07 | 2.3      | ITM2B     | 1.246418338 |     |
| DDR11          | 8.25E-12 | 0.3896075 | 0.306    | 0.214 | 1.99E-07 | 2.3      | DDR1      | 1.429906542 |     |
| NUDT31         | 8.31E-12 | 0.3187742 | 0.143    | 0.076 | 2.00E-07 | 2.3      | NUDT3     | 1.881578947 |     |
| CCDC102B1      | 8.47E-12 | 0.1832536 | 0.076    | 0.03  | 2.04E-07 | 2.3      | CCDC102B  | 2.533333333 |     |
| TMOD31         | 8.84E-12 | 0.5319789 | 0.478    | 0.402 | 2.13E-07 | 2.3      | TMOD3     | 1.189054726 |     |
| SLC25A34       | 9.15E-12 | 0.4627957 | 0.306    | 0.221 | 2.21E-07 | 2.3      | SLC25A3   | 1.384615385 |     |
| IKBIP          | 9.43E-12 | 0.1518181 | 0.031    | 0.007 | 2.27E-07 | 2.3      | IKBIP     | 4.428571429 |     |
| MFSD111        | 9.84E-12 | 0.3377873 | 0.166    | 0.094 | 2.37E-07 | 2.3      | MFSD11    | 1.765957447 |     |
| RP11-421L21.31 | 1.02E-11 | 0.2347018 | 0.052    | 0.017 | 2.47E-07 | 2.3      | RP11-421L | 3.058823529 |     |
| LRRC592        | 1.04E-11 | 0.2564906 | 0.132    | 0.068 | 2.51E-07 | 2.3      | LRRC59    | 1.941176471 |     |
| RP11-798M19.3  | 1.05E-11 | 0.1023367 | 0.027    | 0.006 | 2.54E-07 | 2.3      | RP11-798M | 4.5         |     |
| LRRIQ11        | 1.14E-11 | 0.1505543 | 0.044    | 0.013 | 2.74E-07 | 2.3      | LRRIQ1    | 3.384615385 |     |
| NOP561         | 1.15E-11 | 0.2872877 | 0.1      | 0.046 | 2.77E-07 | 2.3      | NOP56     | 2.173913043 |     |
| RP11-108M9.42  | 1.19E-11 | 0.2133876 | 0.07     | 0.027 | 2.87E-07 | 2.3      | RP11-108M | 2.592592593 |     |
| RTF11          | 1.22E-11 | 0.4184315 | 0.16     | 0.09  | 2.94E-07 | 2.3      | RTF1      | 1.777777778 |     |
| NCSTN2         | 1.25E-11 | 0.2394602 | 0.11     | 0.052 | 3.01E-07 | 2.3      | NCSTN     | 2.115384615 |     |
| DCST1          | 1.29E-11 | 0.1372892 | 0.034    | 0.009 | 3.11E-07 | 2.3      | DCST1     | 3.777777778 |     |
| RP11-452K12.7  | 1.33E-11 | 0.1813417 | 0.056    | 0.02  | 3.22E-07 | 2.3      | RP11-452K | 2.8         |     |

|               |          |           |       |       |          |     |           |             |
|---------------|----------|-----------|-------|-------|----------|-----|-----------|-------------|
| RNF139-AS11   | 1.41E-11 | 0.1205747 | 0.038 | 0.011 | 3.41E-07 | 2.3 | RNF139-AS | 3.454545455 |
| NPSR11        | 1.55E-11 | 0.126111  | 0.042 | 0.012 | 3.73E-07 | 2.3 | NPSR1     | 3.5         |
| TAT-AS11      | 1.56E-11 | 0.1066612 | 0.034 | 0.009 | 3.77E-07 | 2.3 | TAT-AS1   | 3.777777778 |
| MT1E1         | 1.63E-11 | 0.189681  | 0.104 | 0.048 | 3.93E-07 | 2.3 | MT1E      | 2.166666667 |
| PCSK61        | 1.75E-11 | 0.243587  | 0.091 | 0.04  | 4.22E-07 | 2.3 | PCSK6     | 2.275       |
| DNAJC191      | 1.87E-11 | 0.1870238 | 0.07  | 0.028 | 4.52E-07 | 2.3 | DNAJC19   | 2.5         |
| FKBP42        | 1.89E-11 | 0.3469674 | 0.135 | 0.071 | 4.57E-07 | 2.3 | FKBP4     | 1.901408451 |
| ZNF341-AS1    | 1.92E-11 | 0.1251015 | 0.032 | 0.008 | 4.62E-07 | 2.3 | ZNF341-AS | 4           |
| DALRD3        | 2.00E-11 | 0.226752  | 0.056 | 0.02  | 4.81E-07 | 2.3 | DALRD3    | 2.8         |
| BANP1         | 2.03E-11 | 0.3257738 | 0.152 | 0.083 | 4.90E-07 | 2.3 | BANP      | 1.831325301 |
| DEPDC1B2      | 2.04E-11 | 0.206054  | 0.041 | 0.012 | 4.92E-07 | 2.3 | DEPDC1B   | 3.416666667 |
| SOX41         | 2.06E-11 | 0.1180354 | 0.933 | 0.836 | 4.97E-07 | 2.3 | SOX4      | 1.116028708 |
| SRP92         | 2.12E-11 | 0.5047177 | 0.485 | 0.422 | 5.12E-07 | 2.3 | SRP9      | 1.1492891   |
| SLC35E32      | 2.16E-11 | 0.3623354 | 0.142 | 0.077 | 5.20E-07 | 2.3 | SLC35E3   | 1.844155844 |
| ANKRD30B2     | 2.26E-11 | 0.1497386 | 0.055 | 0.019 | 5.44E-07 | 2.3 | ANKRD30B  | 2.894736842 |
| RNF1391       | 2.26E-11 | 0.2930049 | 0.124 | 0.063 | 5.45E-07 | 2.3 | RNF139    | 1.968253968 |
| CHMP51        | 2.35E-11 | 0.3606079 | 0.524 | 0.435 | 5.66E-07 | 2.3 | CHMP5     | 1.204597701 |
| TMEM1562      | 2.64E-11 | 0.7512478 | 0.104 | 0.049 | 6.36E-07 | 2.3 | TMEM156   | 2.12244898  |
| MOCS23        | 2.65E-11 | 0.3920983 | 0.126 | 0.067 | 6.39E-07 | 2.3 | MOCS2     | 1.880597015 |
| CTA-204B4.2   | 2.67E-11 | 0.1021589 | 0.022 | 0.004 | 6.45E-07 | 2.3 | CTA-204B4 | 5.5         |
| TMEM982       | 2.76E-11 | 0.1127712 | 0.034 | 0.009 | 6.64E-07 | 2.3 | TMEM98    | 3.777777778 |
| SEMA3E2       | 2.97E-11 | 0.3651014 | 0.223 | 0.14  | 7.16E-07 | 2.3 | SEMA3E    | 1.592857143 |
| WNT41         | 2.97E-11 | 0.1562122 | 0.041 | 0.012 | 7.16E-07 | 2.3 | WNT4      | 3.416666667 |
| RP11-96O20.21 | 2.99E-11 | 0.1197526 | 0.038 | 0.011 | 7.22E-07 | 2.3 | RP11-96O2 | 3.454545455 |
| ENPP52        | 3.06E-11 | 0.2159109 | 0.079 | 0.033 | 7.37E-07 | 2.3 | ENPP5     | 2.393939394 |
| AOAH          | 3.06E-11 | 0.1014607 | 0.025 | 0.005 | 7.38E-07 | 2.3 | AOAH      | 5           |
| IER52         | 3.10E-11 | 0.2983203 | 0.188 | 0.111 | 7.47E-07 | 2.3 | IER5      | 1.693693694 |
| OAT3          | 3.23E-11 | 0.4442996 | 0.364 | 0.275 | 7.80E-07 | 2.3 | OAT       | 1.323636364 |
| ULK4          | 3.26E-11 | 0.3832214 | 0.188 | 0.113 | 7.86E-07 | 2.3 | ULK4      | 1.663716814 |
| INPP4B1       | 3.55E-11 | 0.337685  | 0.447 | 0.327 | 8.55E-07 | 2.3 | INPP4B    | 1.366972477 |
| RP3-331H24.51 | 3.57E-11 | 0.1931228 | 0.076 | 0.031 | 8.62E-07 | 2.3 | RP3-331H2 | 2.451612903 |
| ENPP31        | 3.75E-11 | 0.1142328 | 0.039 | 0.011 | 9.04E-07 | 2.3 | ENPP3     | 3.545454545 |
| CNDP22        | 3.81E-11 | 0.3237297 | 0.201 | 0.123 | 9.18E-07 | 2.3 | CNDP2     | 1.634146341 |
| DNER2         | 3.84E-11 | 0.2313002 | 0.096 | 0.044 | 9.27E-07 | 2.3 | DNER      | 2.181818182 |
| MORF4L24      | 4.16E-11 | 0.3489177 | 0.756 | 0.742 | 1.00E-06 | 2.3 | MORF4L2   | 1.018867925 |
| SORD2         | 4.33E-11 | 0.2028092 | 0.077 | 0.032 | 1.04E-06 | 2.3 | SORD      | 2.40625     |
| RP1-221C16.81 | 4.42E-11 | 0.3731759 | 0.117 | 0.059 | 1.07E-06 | 2.3 | RP1-221C1 | 1.983050847 |
| PTH           | 4.54E-11 | 0.1333312 | 0.046 | 0.015 | 1.10E-06 | 2.3 | PTH       | 3.066666667 |
| DYNC1I21      | 4.65E-11 | 0.5368032 | 0.441 | 0.382 | 1.12E-06 | 2.3 | DYNC1I2   | 1.154450262 |
| RP11-96O20.42 | 4.65E-11 | 0.1186212 | 0.037 | 0.01  | 1.12E-06 | 2.3 | RP11-96O2 | 3.7         |
| GPBP13        | 4.68E-11 | 0.3630597 | 0.721 | 0.688 | 1.13E-06 | 2.3 | GPBP1     | 1.047965116 |
| BRAT1         | 4.91E-11 | 0.1127758 | 0.025 | 0.006 | 1.18E-06 | 2.3 | BRAT1     | 4.166666667 |
| ADGRA2        | 5.00E-11 | 0.1920874 | 0.017 | 0.003 | 1.21E-06 | 2.3 | ADGRA2    | 5.666666667 |
| FMOD2         | 5.09E-11 | 0.1371198 | 0.031 | 0.008 | 1.23E-06 | 2.3 | FMOD      | 3.875       |
| RBM20         | 5.21E-11 | 0.1252693 | 0.031 | 0.008 | 1.26E-06 | 2.3 | RBM20     | 3.875       |
| RGL22         | 5.23E-11 | 0.2203669 | 0.093 | 0.042 | 1.26E-06 | 2.3 | RGL2      | 2.214285714 |
| TSC22D1       | 5.66E-11 | 0.4181791 | 0.452 | 0.365 | 1.37E-06 | 2.3 | TSC22D1   | 1.238356164 |
| PNPLA41       | 6.01E-11 | 0.2162457 | 0.065 | 0.025 | 1.45E-06 | 2.3 | PNPLA4    | 2.6         |
| SBF2-AS11     | 6.21E-11 | 0.2458106 | 0.081 | 0.035 | 1.50E-06 | 2.3 | SBF2-AS1  | 2.314285714 |
| DDIT32        | 6.21E-11 | 0.3688975 | 0.177 | 0.105 | 1.50E-06 | 2.3 | DDIT3     | 1.685714286 |
| ACTN1-AS12    | 6.22E-11 | 0.1286002 | 0.031 | 0.008 | 1.50E-06 | 2.3 | ACTN1-AS1 | 3.875       |
| RP21          | 6.29E-11 | 0.2581861 | 0.076 | 0.032 | 1.52E-06 | 2.3 | RP2       | 2.375       |

|                |          |           |       |       |          |     |           |             |
|----------------|----------|-----------|-------|-------|----------|-----|-----------|-------------|
| RP11-277A4.41  | 6.61E-11 | 0.1146755 | 0.046 | 0.015 | 1.59E-06 | 2.3 | RP11-277A | 3.066666667 |
| LY75-CD302     | 7.65E-11 | 0.1037738 | 0.028 | 0.007 | 1.85E-06 | 2.3 | LY75-CD30 | 4           |
| SREK1IP11      | 7.83E-11 | 0.4134738 | 0.243 | 0.166 | 1.89E-06 | 2.3 | SREK1IP1  | 1.463855422 |
| PPP1R72        | 7.85E-11 | 0.292641  | 0.1   | 0.048 | 1.89E-06 | 2.3 | PPP1R7    | 2.083333333 |
| STON21         | 8.06E-11 | 0.3101004 | 0.1   | 0.048 | 1.94E-06 | 2.3 | STON2     | 2.083333333 |
| ERBB22         | 8.23E-11 | 0.4088935 | 0.19  | 0.116 | 1.98E-06 | 2.3 | ERBB2     | 1.637931034 |
| KANSL1L1       | 8.28E-11 | 0.423363  | 0.298 | 0.213 | 2.00E-06 | 2.3 | KANSL1L   | 1.399061033 |
| SLC20A11       | 8.50E-11 | 0.3455434 | 0.124 | 0.064 | 2.05E-06 | 2.3 | SLC20A1   | 1.9375      |
| PRSS23         | 8.71E-11 | 0.3184035 | 0.32  | 0.22  | 2.10E-06 | 2.3 | PRSS23    | 1.454545455 |
| C11orf84       | 8.76E-11 | 0.146887  | 0.041 | 0.012 | 2.11E-06 | 2.3 | C11orf84  | 3.416666667 |
| PNPO1          | 9.36E-11 | 0.1005466 | 0.025 | 0.006 | 2.26E-06 | 2.3 | PNPO      | 4.166666667 |
| CXCL82         | 9.81E-11 | 0.534776  | 0.548 | 0.444 | 2.37E-06 | 2.3 | CXCL8     | 1.234234234 |
| EHD11          | 9.95E-11 | 0.189447  | 0.062 | 0.024 | 2.40E-06 | 2.3 | EHD1      | 2.583333333 |
| RP11-665G4.11  | 1.01E-10 | 0.3623487 | 0.156 | 0.088 | 2.45E-06 | 2.3 | RP11-665G | 1.772727273 |
| FGF131         | 1.02E-10 | 0.345263  | 0.565 | 0.451 | 2.45E-06 | 2.3 | FGF13     | 1.252771619 |
| RP11-371F15.31 | 1.02E-10 | 0.3128933 | 0.153 | 0.085 | 2.46E-06 | 2.3 | RP11-371F | 1.8         |
| DNAJC91        | 1.03E-10 | 0.3275334 | 0.128 | 0.068 | 2.49E-06 | 2.3 | DNAJC9    | 1.882352941 |
| TCF7L22        | 1.06E-10 | 0.4697285 | 0.461 | 0.381 | 2.54E-06 | 2.3 | TCF7L2    | 1.209973753 |
| RASSF61        | 1.09E-10 | 0.3557891 | 0.129 | 0.069 | 2.63E-06 | 2.3 | RASSF6    | 1.869565217 |
| H3F3B2         | 1.15E-10 | 0.4734196 | 0.463 | 0.392 | 2.76E-06 | 2.3 | H3F3B     | 1.181122449 |
| SCD53          | 1.19E-10 | 0.242743  | 0.086 | 0.038 | 2.87E-06 | 2.3 | SCD5      | 2.263157895 |
| MT-ND61        | 1.20E-10 | 0.4859299 | 0.257 | 0.177 | 2.90E-06 | 2.3 | MT-ND6    | 1.451977401 |
| TBC1D10A2      | 1.24E-10 | 0.7883084 | 0.233 | 0.154 | 3.00E-06 | 2.3 | TBC1D10A  | 1.512987013 |
| DPCD1          | 1.25E-10 | 0.319771  | 0.147 | 0.082 | 3.01E-06 | 2.3 | DPCD      | 1.792682927 |
| TIMP3          | 1.29E-10 | 0.1403653 | 0.045 | 0.015 | 3.10E-06 | 2.3 | TIMP3     | 3           |
| RP5-823G15.51  | 1.32E-10 | 0.1065702 | 0.027 | 0.006 | 3.18E-06 | 2.3 | RP5-823G1 | 4.5         |
| RP11-696N14.1  | 1.36E-10 | 0.1516719 | 0.034 | 0.009 | 3.27E-06 | 2.3 | RP11-696N | 3.777777778 |
| FUT82          | 1.37E-10 | 0.4676738 | 0.358 | 0.259 | 3.30E-06 | 2.3 | FUT8      | 1.382239382 |
| CETN21         | 1.37E-10 | 0.3834708 | 0.264 | 0.181 | 3.31E-06 | 2.3 | CETN2     | 1.458563536 |
| ADPRHL11       | 1.39E-10 | 0.1056093 | 0.031 | 0.008 | 3.34E-06 | 2.3 | ADPRHL1   | 3.875       |
| PLCG1          | 1.40E-10 | 0.1183649 | 0.035 | 0.01  | 3.38E-06 | 2.3 | PLCG1     | 3.5         |
| LGALS3BP       | 1.47E-10 | 0.2159079 | 0.069 | 0.028 | 3.54E-06 | 2.3 | LGALS3BP  | 2.464285714 |
| COL4A61        | 1.53E-10 | 0.2593934 | 0.118 | 0.06  | 3.68E-06 | 2.3 | COL4A6    | 1.966666667 |
| CCDC731        | 1.58E-10 | 0.4248282 | 0.178 | 0.106 | 3.81E-06 | 2.3 | CCDC73    | 1.679245283 |
| MYB2           | 1.66E-10 | 0.1818678 | 0.058 | 0.022 | 3.99E-06 | 2.3 | MYB       | 2.636363636 |
| ATG1011        | 1.70E-10 | 0.224616  | 0.073 | 0.031 | 4.09E-06 | 2.3 | ATG101    | 2.35483871  |
| FMO42          | 1.75E-10 | 0.234904  | 0.11  | 0.055 | 4.22E-06 | 2.3 | FMO4      | 2           |
| FSIP12         | 1.80E-10 | 0.2486449 | 0.105 | 0.051 | 4.33E-06 | 2.3 | FSIP1     | 2.058823529 |
| MAN2B21        | 1.80E-10 | 0.1442035 | 0.042 | 0.013 | 4.35E-06 | 2.3 | MAN2B2    | 3.230769231 |
| FBXL31         | 1.88E-10 | 0.3084064 | 0.174 | 0.104 | 4.54E-06 | 2.3 | FBXL3     | 1.673076923 |
| RNF1281        | 1.93E-10 | 0.3594874 | 0.201 | 0.126 | 4.64E-06 | 2.3 | RNF128    | 1.595238095 |
| RP11-659O3.12  | 2.11E-10 | 0.3231073 | 0.244 | 0.164 | 5.09E-06 | 2.3 | RP11-659O | 1.487804878 |
| HTT-AS         | 2.11E-10 | 0.1003011 | 0.011 | 0.001 | 5.09E-06 | 2.3 | HTT-AS    | 11          |
| ALOX15B1       | 2.16E-10 | 0.291062  | 0.11  | 0.054 | 5.21E-06 | 2.3 | ALOX15B   | 2.037037037 |
| ANO4           | 2.17E-10 | 0.1160971 | 0.027 | 0.006 | 5.24E-06 | 2.3 | ANO4      | 4.5         |
| C12orf73       | 2.17E-10 | 0.1874429 | 0.051 | 0.018 | 5.24E-06 | 2.3 | C12orf73  | 2.833333333 |
| CTD-2666L21.1  | 2.20E-10 | 0.2163877 | 0.048 | 0.016 | 5.30E-06 | 2.3 | CTD-2666L | 3           |
| OVOL11         | 2.46E-10 | 0.1055361 | 0.032 | 0.009 | 5.93E-06 | 2.3 | OVOL1     | 3.555555556 |
| ASXL11         | 2.56E-10 | 0.4802029 | 0.333 | 0.255 | 6.18E-06 | 2.3 | ASXL1     | 1.305882353 |
| ERI2           | 2.56E-10 | 0.2329086 | 0.072 | 0.03  | 6.18E-06 | 2.3 | ERI2      | 2.4         |
| ATP5H3         | 2.66E-10 | 0.4797666 | 0.416 | 0.349 | 6.40E-06 | 2.3 | ATP5H     | 1.191977077 |
| CRNDE2         | 2.68E-10 | 0.3554859 | 0.17  | 0.102 | 6.45E-06 | 2.3 | CRNDE     | 1.666666667 |

|               |          |           |       |       |          |     |              |             |
|---------------|----------|-----------|-------|-------|----------|-----|--------------|-------------|
| SLC25A44      | 2.69E-10 | 0.1496504 | 0.045 | 0.015 | 6.48E-06 | 2.3 | SLC25A44     | 3           |
| ECI21         | 2.72E-10 | 0.3365739 | 0.136 | 0.076 | 6.55E-06 | 2.3 | ECI2         | 1.789473684 |
| CXCR42        | 2.83E-10 | 0.4356528 | 0.302 | 0.216 | 6.82E-06 | 2.3 | CXCR4        | 1.398148148 |
| SLC13A12      | 2.85E-10 | 0.1231765 | 0.044 | 0.014 | 6.86E-06 | 2.3 | SLC13A1      | 3.142857143 |
| YY11          | 2.88E-10 | 0.392099  | 0.302 | 0.22  | 6.94E-06 | 2.3 | YY1          | 1.372727273 |
| LYPD3         | 2.99E-10 | 0.2302223 | 0.121 | 0.063 | 7.20E-06 | 2.3 | LYPD3        | 1.920634921 |
| TAF9B2        | 3.19E-10 | 0.1480657 | 0.045 | 0.015 | 7.69E-06 | 2.3 | TAF9B        | 3           |
| GAPLINC1      | 3.32E-10 | 0.1245973 | 0.035 | 0.01  | 8.01E-06 | 2.3 | GAPLINC      | 3.5         |
| CAPN132       | 3.36E-10 | 0.189953  | 0.083 | 0.037 | 8.11E-06 | 2.3 | CAPN13       | 2.243243243 |
| POLR3GL1      | 3.93E-10 | 0.1218815 | 0.037 | 0.011 | 9.46E-06 | 2.3 | POLR3GL      | 3.363636364 |
| SECISBP21     | 4.02E-10 | 0.3768541 | 0.163 | 0.098 | 9.69E-06 | 2.3 | SECISBP2     | 1.663265306 |
| HSP90AB15     | 4.04E-10 | 0.2446269 | 0.909 | 0.837 | 9.74E-06 | 2.3 | HSP90AB1     | 1.086021505 |
| TXLNB         | 4.19E-10 | 0.1009851 | 0.024 | 0.005 | 1.01E-05 | 2.3 | TXLNB        | 4.8         |
| KIZ-AS15      | 4.21E-10 | 0.2076876 | 0.868 | 0.843 | 1.02E-05 | 2.3 | KIZ-AS1      | 1.029655991 |
| AGA2          | 4.45E-10 | 0.1717927 | 0.074 | 0.032 | 1.07E-05 | 2.3 | AGA          | 2.3125      |
| RP11-21L19.1  | 4.98E-10 | 0.1638234 | 0.059 | 0.023 | 1.20E-05 | 2.3 | RP11-21L19.1 | 2.565217391 |
| FAM46B3       | 5.66E-10 | 0.2916921 | 0.105 | 0.053 | 1.37E-05 | 2.3 | FAM46B       | 1.981132075 |
| TTC61         | 6.06E-10 | 0.3445824 | 0.258 | 0.173 | 1.46E-05 | 2.3 | TTC6         | 1.49132948  |
| COPZ13        | 6.15E-10 | 0.448919  | 0.39  | 0.32  | 1.48E-05 | 2.3 | COPZ1        | 1.21875     |
| HIVEP22       | 6.18E-10 | 0.3065264 | 0.538 | 0.448 | 1.49E-05 | 2.3 | HIVEP2       | 1.200892857 |
| KLHL25        | 6.23E-10 | 0.108106  | 0.034 | 0.01  | 1.50E-05 | 2.3 | KLHL25       | 3.4         |
| TMEM1161      | 6.29E-10 | 0.3141712 | 0.133 | 0.074 | 1.52E-05 | 2.3 | TMEM116      | 1.797297297 |
| BRI3BP1       | 6.34E-10 | 0.1673653 | 0.039 | 0.012 | 1.53E-05 | 2.3 | BRI3BP       | 3.25        |
| ARHGEF372     | 6.35E-10 | 0.2464678 | 0.103 | 0.051 | 1.53E-05 | 2.3 | ARHGEF37     | 2.019607843 |
| PAFAH21       | 6.38E-10 | 0.1742078 | 0.055 | 0.021 | 1.54E-05 | 2.3 | PAFAH2       | 2.619047619 |
| MB21D1        | 6.69E-10 | 0.1507608 | 0.037 | 0.011 | 1.61E-05 | 2.3 | MB21D1       | 3.363636364 |
| FN12          | 6.95E-10 | 0.1834468 | 0.067 | 0.028 | 1.67E-05 | 2.3 | FN1          | 2.392857143 |
| TGFBR11       | 6.95E-10 | 0.3973977 | 0.183 | 0.114 | 1.68E-05 | 2.3 | TGFBR1       | 1.605263158 |
| STX32         | 7.07E-10 | 0.3596277 | 0.212 | 0.138 | 1.70E-05 | 2.3 | STX3         | 1.536231884 |
| XXYLT11       | 7.08E-10 | 0.133993  | 0.037 | 0.011 | 1.71E-05 | 2.3 | XXYLT1       | 3.363636364 |
| GATM1         | 7.53E-10 | 0.1670284 | 0.052 | 0.019 | 1.81E-05 | 2.3 | GATM         | 2.736842105 |
| PEMT2         | 7.98E-10 | 0.5779148 | 0.083 | 0.038 | 1.92E-05 | 2.3 | PEMT         | 2.184210526 |
| CTD-220118.1  | 8.02E-10 | 0.100223  | 0.029 | 0.008 | 1.93E-05 | 2.3 | CTD-220118.1 | 3.625       |
| PPP1R1B3      | 8.03E-10 | 0.1916675 | 0.074 | 0.033 | 1.94E-05 | 2.3 | PPP1R1B      | 2.242424242 |
| KLF63         | 8.07E-10 | 0.5178711 | 0.619 | 0.57  | 1.95E-05 | 2.3 | KLF6         | 1.085964912 |
| EPB41L51      | 8.27E-10 | 0.3946971 | 0.379 | 0.295 | 1.99E-05 | 2.3 | EPB41L5      | 1.284745763 |
| VDAC11        | 8.28E-10 | 0.4110249 | 0.287 | 0.211 | 2.00E-05 | 2.3 | VDAC1        | 1.360189573 |
| LINC01094     | 8.28E-10 | 0.1014663 | 0.022 | 0.005 | 2.00E-05 | 2.3 | LINC01094    | 4.4         |
| CYP51A1-AS1   | 8.37E-10 | 0.1118401 | 0.035 | 0.01  | 2.02E-05 | 2.3 | CYP51A1-A    | 3.5         |
| VAMP8         | 9.05E-10 | 0.2162582 | 0.806 | 0.759 | 2.18E-05 | 2.3 | VAMP8        | 1.061923584 |
| ASPH1         | 9.17E-10 | 0.3215474 | 0.379 | 0.283 | 2.21E-05 | 2.3 | ASPH         | 1.339222615 |
| DNASE1        | 9.89E-10 | 0.245036  | 0.103 | 0.052 | 2.39E-05 | 2.3 | DNASE1       | 1.980769231 |
| RP11-317J19.1 | 9.97E-10 | 0.2270949 | 0.066 | 0.028 | 2.40E-05 | 2.3 | RP11-317J1   | 2.357142857 |
| HNRNPA01      | 1.03E-09 | 0.3286991 | 0.162 | 0.096 | 2.48E-05 | 2.3 | HNRNPA0      | 1.6875      |
| AZIN12        | 1.06E-09 | 0.3935822 | 0.284 | 0.203 | 2.56E-05 | 2.3 | AZIN1        | 1.399014778 |
| GPN3          | 1.07E-09 | 0.1656623 | 0.059 | 0.023 | 2.59E-05 | 2.3 | GPN3         | 2.565217391 |
| KTN12         | 1.08E-09 | 0.3441645 | 0.597 | 0.542 | 2.61E-05 | 2.3 | KTN1         | 1.101476015 |
| CLIC61        | 1.14E-09 | 0.4828541 | 0.296 | 0.217 | 2.75E-05 | 2.3 | CLIC6        | 1.3640553   |
| PAPLN         | 1.15E-09 | 0.1137095 | 0.039 | 0.013 | 2.77E-05 | 2.3 | PAPLN        | 3           |
| GLRX52        | 1.21E-09 | 0.2223617 | 0.076 | 0.034 | 2.91E-05 | 2.3 | GLRX5        | 2.235294118 |
| PROM22        | 1.22E-09 | 0.2190318 | 0.098 | 0.049 | 2.94E-05 | 2.3 | PROM2        | 2           |
| ARPP191       | 1.27E-09 | 0.3699258 | 0.503 | 0.429 | 3.06E-05 | 2.3 | ARPP19       | 1.172494172 |

|               |          |           |       |       |             |     |               |             |
|---------------|----------|-----------|-------|-------|-------------|-----|---------------|-------------|
| MATN32        | 1.31E-09 | 0.1696525 | 0.07  | 0.03  | 3.17E-05    | 2.3 | MATN3         | 2.333333333 |
| SETD91        | 1.35E-09 | 0.2139041 | 0.056 | 0.022 | 3.26E-05    | 2.3 | SETD9         | 2.545454545 |
| WNK11         | 1.40E-09 | 0.3874173 | 0.317 | 0.241 | 3.38E-05    | 2.3 | WNK1          | 1.315352697 |
| MRPS211       | 1.42E-09 | 0.3828364 | 0.562 | 0.517 | 3.42E-05    | 2.3 | MRPS21        | 1.087040619 |
| GDPD42        | 1.43E-09 | 0.1266732 | 0.035 | 0.011 | 3.46E-05    | 2.3 | GDPD4         | 3.181818182 |
| GCLC          | 1.49E-09 | 0.3366439 | 0.126 | 0.07  | 3.60E-05    | 2.3 | GCLC          | 1.8         |
| PRPF40A1      | 1.56E-09 | 0.3621731 | 0.25  | 0.173 | 3.77E-05    | 2.3 | PRPF40A       | 1.445086705 |
| SYK1          | 1.56E-09 | 0.1561608 | 0.044 | 0.015 | 3.77E-05    | 2.3 | SYK           | 2.933333333 |
| TMEM9B1       | 1.61E-09 | 0.2413322 | 0.09  | 0.043 | 3.87E-05    | 2.3 | TMEM9B        | 2.093023256 |
| HMG213        | 1.61E-09 | 0.295758  | 0.107 | 0.056 | 3.88E-05    | 2.3 | HMG213        | 1.910714286 |
| ENY23         | 1.72E-09 | 0.4283167 | 0.454 | 0.389 | 4.15E-05    | 2.3 | ENY2          | 1.167095116 |
| DNAL11        | 1.73E-09 | 0.3491029 | 0.088 | 0.042 | 4.18E-05    | 2.3 | DNAL1         | 2.095238095 |
| ALDH3B22      | 1.73E-09 | 0.1053987 | 0.035 | 0.011 | 4.18E-05    | 2.3 | ALDH3B2       | 3.181818182 |
| LMO72         | 1.74E-09 | 0.5013815 | 0.27  | 0.184 | 4.20E-05    | 2.3 | LMO7          | 1.467391304 |
| CHD3          | 1.74E-09 | 0.2743544 | 0.107 | 0.055 | 4.20E-05    | 2.3 | CHD3          | 1.945454545 |
| RP11-13A1.31  | 1.81E-09 | 0.1042476 | 0.031 | 0.009 | 4.37E-05    | 2.3 | RP11-13A1     | 3.444444444 |
| CYB5A1        | 1.86E-09 | 0.3451411 | 0.347 | 0.257 | 4.49E-05    | 2.3 | CYB5A         | 1.350194553 |
| MMP10         | 1.98E-09 | 0.1607413 | 0.025 | 0.006 | 4.78E-05    | 2.3 | MMP10         | 4.166666667 |
| SNX51         | 2.00E-09 | 0.3315686 | 0.119 | 0.066 | 4.82E-05    | 2.3 | SNX5          | 1.803030303 |
| C16orf722     | 2.05E-09 | 0.376969  | 0.212 | 0.14  | 4.93E-05    | 2.3 | C16orf72      | 1.514285714 |
| SLC22A141     | 2.07E-09 | 0.1133635 | 0.032 | 0.009 | 4.99E-05    | 2.3 | SLC22A14      | 3.555555556 |
| DAB11         | 2.38E-09 | 0.3175627 | 0.108 | 0.056 | 5.74E-05    | 2.3 | DAB1          | 1.928571429 |
| LAMTOR53      | 2.44E-09 | 0.3129948 | 0.624 | 0.586 | 5.89E-05    | 2.3 | LAMTOR5       | 1.064846416 |
| SEP152        | 2.54E-09 | 0.3998194 | 0.478 | 0.412 | 6.13E-05    | 2.3 | Sep-15        | 1.160194175 |
| DPY302        | 2.57E-09 | 0.3736453 | 0.251 | 0.179 | 6.19E-05    | 2.3 | DPY30         | 1.402234637 |
| SLC2A5        | 2.59E-09 | 0.1085419 | 0.024 | 0.006 | 6.23E-05    | 2.3 | SLC2A5        | 4           |
| LMNA          | 2.60E-09 | 0.4109012 | 0.312 | 0.231 | 6.27E-05    | 2.3 | LMNA          | 1.350649351 |
| LYRM52        | 2.64E-09 | 0.3329693 | 0.173 | 0.108 | 6.36E-05    | 2.3 | LYRM5         | 1.601851852 |
| ERVK3-11      | 2.70E-09 | 0.1891443 | 0.077 | 0.035 | 6.50E-05    | 2.3 | ERVK3-1       | 2.2         |
| ZFAND2A2      | 2.72E-09 | 0.2926948 | 0.081 | 0.038 | 6.55E-05    | 2.3 | ZFAND2A       | 2.131578947 |
| FAM234B2      | 2.77E-09 | 0.2387983 | 0.094 | 0.047 | 6.68E-05    | 2.3 | FAM234B       | 2           |
| PHX1          | 2.86E-09 | 0.1555386 | 0.055 | 0.021 | 6.90E-05    | 2.3 | PHX           | 2.619047619 |
| RP4-724E16.21 | 2.88E-09 | 0.1438497 | 0.053 | 0.021 | 6.96E-05    | 2.3 | RP4-724E16.21 | 2.523809524 |
| CYP2A62       | 2.91E-09 | 0.1034335 | 0.025 | 0.006 | 7.01E-05    | 2.3 | CYP2A6        | 4.166666667 |
| MSL11         | 2.93E-09 | 0.3090435 | 0.225 | 0.151 | 7.06E-05    | 2.3 | MSL1          | 1.490066225 |
| AL591893.11   | 2.97E-09 | 0.5583054 | 0.076 | 0.035 | 7.17E-05    | 2.3 | AL591893.11   | 2.171428571 |
| GPR158        | 3.17E-09 | 0.2681384 | 0.093 | 0.046 | 7.64E-05    | 2.3 | GPR158        | 2.02173913  |
| DAPK32        | 3.32E-09 | 0.2293682 | 0.104 | 0.054 | 8.01E-05    | 2.3 | DAPK3         | 1.925925926 |
| MRPL403       | 3.43E-09 | 0.3345884 | 0.154 | 0.093 | 8.27E-05    | 2.3 | MRPL40        | 1.655913978 |
| FEM1B2        | 3.46E-09 | 0.3364578 | 0.246 | 0.168 | 8.34E-05    | 2.3 | FEM1B         | 1.464285714 |
| TOP12         | 3.52E-09 | 0.3021348 | 0.528 | 0.445 | 8.50E-05    | 2.3 | TOP1          | 1.186516854 |
| LINC01060     | 3.64E-09 | 0.1671125 | 0.038 | 0.012 | 8.79E-05    | 2.3 | LINC01060     | 3.166666667 |
| BHLHE402      | 3.70E-09 | 0.5516981 | 0.26  | 0.187 | 8.91E-05    | 2.3 | BHLHE40       | 1.390374332 |
| VAV1          | 3.97E-09 | 0.1101277 | 0.024 | 0.006 | 9.57E-05    | 2.3 | VAV1          | 4           |
| HNRNPA2B13    | 4.10E-09 | 0.3849857 | 0.478 | 0.412 | 9.88E-05    | 2.3 | HNRNPA2B      | 1.160194175 |
| SLC35F41      | 4.21E-09 | 0.12199   | 0.032 | 0.01  | 0.000101448 | 2.3 | SLC35F4       | 3.2         |
| GNG51         | 4.21E-09 | 0.2779529 | 0.187 | 0.118 | 0.00010147  | 2.3 | GNG5          | 1.584745763 |
| TSPYL1        | 4.27E-09 | 0.2774208 | 0.104 | 0.055 | 0.00010296  | 2.3 | TSPYL1        | 1.890909091 |
| MEX3C1        | 4.35E-09 | 0.314129  | 0.121 | 0.066 | 0.000104893 | 2.3 | MEX3C         | 1.833333333 |
| SRRM3         | 4.37E-09 | 0.1386279 | 0.025 | 0.006 | 0.000105284 | 2.3 | SRRM3         | 4.166666667 |
| RNF81         | 4.43E-09 | 0.1476356 | 0.051 | 0.019 | 0.000106704 | 2.3 | RNF8          | 2.684210526 |
| CADPS22       | 4.51E-09 | 0.5455629 | 0.466 | 0.403 | 0.000108757 | 2.3 | CADPS2        | 1.156327543 |

|                |          |           |       |       |             |     |           |             |
|----------------|----------|-----------|-------|-------|-------------|-----|-----------|-------------|
| AMIGO22        | 4.57E-09 | 0.1885769 | 0.058 | 0.023 | 0.000110279 | 2.3 | AMIGO2    | 2.52173913  |
| RP11-37N22.11  | 4.73E-09 | 0.1961049 | 0.074 | 0.034 | 0.000113957 | 2.3 | RP11-37N2 | 2.176470588 |
| CFL11          | 4.75E-09 | 0.3751131 | 0.399 | 0.316 | 0.000114511 | 2.3 | CFL1      | 1.262658228 |
| RP11-439A17.41 | 4.83E-09 | 0.276681  | 0.121 | 0.066 | 0.000116363 | 2.3 | RP11-439A | 1.833333333 |
| DUSP102        | 4.92E-09 | 0.3331502 | 0.308 | 0.223 | 0.000118522 | 2.3 | DUSP10    | 1.381165919 |
| RP11-189B4.71  | 5.12E-09 | 0.244359  | 0.107 | 0.056 | 0.000123516 | 2.3 | RP11-189B | 1.910714286 |
| PFN11          | 5.32E-09 | 0.305999  | 0.26  | 0.185 | 0.000128287 | 2.3 | PFN1      | 1.405405405 |
| ZNF724P1       | 5.35E-09 | 0.120114  | 0.035 | 0.011 | 0.000128944 | 2.3 | ZNF724P   | 3.181818182 |
| MIR99AHG2      | 5.37E-09 | 0.2641068 | 0.119 | 0.065 | 0.000129384 | 2.3 | MIR99AHG  | 1.830769231 |
| MAPKAPK22      | 5.43E-09 | 0.4100312 | 0.215 | 0.145 | 0.000130835 | 2.3 | MAPKAPK2  | 1.482758621 |
| CTBS           | 5.59E-09 | 0.1803131 | 0.072 | 0.032 | 0.00013475  | 2.3 | CTBS      | 2.25        |
| TNC2           | 5.76E-09 | 0.191848  | 0.438 | 0.33  | 0.00013901  | 2.3 | TNC       | 1.327272727 |
| FAM84A         | 5.81E-09 | 0.202786  | 0.052 | 0.02  | 0.000140193 | 2.3 | FAM84A    | 2.6         |
| RP11-84A19.43  | 5.87E-09 | 0.2086404 | 0.104 | 0.054 | 0.000141552 | 2.3 | RP11-84A1 | 1.925925926 |
| FUS1           | 6.11E-09 | 0.3824091 | 0.358 | 0.283 | 0.000147386 | 2.3 | FUS       | 1.265017668 |
| PLIN3          | 6.41E-09 | 0.3636404 | 0.229 | 0.157 | 0.000154541 | 2.3 | PLIN3     | 1.458598726 |
| SOD11          | 6.41E-09 | 0.3160006 | 0.188 | 0.121 | 0.000154623 | 2.3 | SOD1      | 1.553719008 |
| ATP8A2         | 6.50E-09 | 0.1339796 | 0.032 | 0.01  | 0.00015664  | 2.3 | ATP8A2    | 3.2         |
| THSD4-AS13     | 6.57E-09 | 0.4143611 | 0.521 | 0.457 | 0.000158486 | 2.3 | THSD4-AS1 | 1.140043764 |
| STK35          | 6.98E-09 | 0.2012959 | 0.077 | 0.036 | 0.000168232 | 2.3 | STK35     | 2.138888889 |
| ABCC112        | 6.99E-09 | 0.1397857 | 0.041 | 0.014 | 0.000168591 | 2.3 | ABCC11    | 2.928571429 |
| PRKAR1A2       | 7.25E-09 | 0.3063155 | 0.322 | 0.238 | 0.000174902 | 2.3 | PRKAR1A   | 1.352941176 |
| C14orf371      | 7.38E-09 | 0.3217303 | 0.167 | 0.104 | 0.000177988 | 2.3 | C14orf37  | 1.605769231 |
| RAB11FIP4      | 7.44E-09 | 0.2311648 | 0.087 | 0.043 | 0.000179458 | 2.3 | RAB11FIP4 | 2.023255814 |
| AQP3           | 7.62E-09 | 0.4693544 | 0.104 | 0.055 | 0.000183723 | 2.3 | AQP3      | 1.890909091 |
| DGUOK-AS11     | 7.95E-09 | 0.1010965 | 0.031 | 0.009 | 0.000191708 | 2.3 | DGUOK-AS  | 3.444444444 |
| AC010149.41    | 7.99E-09 | 0.280649  | 0.114 | 0.062 | 0.00019267  | 2.3 | AC010149. | 1.838709677 |
| NOSTRIN1       | 8.00E-09 | 0.1938058 | 0.074 | 0.034 | 0.00019289  | 2.3 | NOSTRIN   | 2.176470588 |
| RIC8B          | 8.00E-09 | 0.2349432 | 0.083 | 0.04  | 0.000193024 | 2.3 | RIC8B     | 2.075       |
| DDX23          | 8.20E-09 | 0.2882155 | 0.11  | 0.059 | 0.000197664 | 2.3 | DDX23     | 1.86440678  |
| C5orf451       | 8.42E-09 | 0.3323195 | 0.076 | 0.036 | 0.000203003 | 2.3 | C5orf45   | 2.111111111 |
| MLH1           | 8.61E-09 | 0.2041744 | 0.087 | 0.043 | 0.000207668 | 2.3 | MLH1      | 2.023255814 |
| SSUH21         | 8.85E-09 | 0.1528763 | 0.042 | 0.015 | 0.000213388 | 2.3 | SSUH2     | 2.8         |
| RAB8A          | 9.27E-09 | 0.1811143 | 0.06  | 0.026 | 0.000223511 | 2.3 | RAB8A     | 2.307692308 |
| SKIL1          | 1.01E-08 | 0.339158  | 0.166 | 0.104 | 0.000243473 | 2.3 | SKIL      | 1.596153846 |
| GFPT2          | 1.04E-08 | 0.1386091 | 0.038 | 0.013 | 0.000250703 | 2.3 | GFPT2     | 2.923076923 |
| FSIP21         | 1.04E-08 | 0.1204636 | 0.034 | 0.011 | 0.00025077  | 2.3 | FSIP2     | 3.090909091 |
| GNPNAT11       | 1.12E-08 | 0.1956625 | 0.063 | 0.027 | 0.00026978  | 2.3 | GNPNAT1   | 2.333333333 |
| GJC32          | 1.14E-08 | 0.3084209 | 0.153 | 0.093 | 0.000274963 | 2.3 | GJC3      | 1.64516129  |
| ITPKA          | 1.33E-08 | 0.1011849 | 0.02  | 0.004 | 0.000319634 | 2.3 | ITPKA     | 5           |
| NR4A21         | 1.49E-08 | 0.3576706 | 0.173 | 0.109 | 0.000358803 | 2.3 | NR4A2     | 1.587155963 |
| MAGED21        | 1.55E-08 | 0.2016846 | 0.063 | 0.027 | 0.000374131 | 2.3 | MAGED2    | 2.333333333 |
| LONRF3         | 1.57E-08 | 0.2057503 | 0.058 | 0.024 | 0.000377911 | 2.3 | LONRF3    | 2.416666667 |
| KIF91          | 1.60E-08 | 0.640139  | 0.131 | 0.075 | 0.000386028 | 2.3 | KIF9      | 1.746666667 |
| FHAD1          | 1.66E-08 | 0.2130495 | 0.055 | 0.022 | 0.000399518 | 2.3 | FHAD1     | 2.5         |
| RPL376         | 1.66E-08 | 0.1693269 | 0.951 | 0.945 | 0.000400555 | 2.3 | RPL37     | 1.006349206 |
| PPCS1          | 1.70E-08 | 0.2142776 | 0.087 | 0.043 | 0.000410768 | 2.3 | PPCS      | 2.023255814 |
| ARAP21         | 1.76E-08 | 0.4177204 | 0.239 | 0.167 | 0.000423377 | 2.3 | ARAP2     | 1.431137725 |
| SARAF2         | 1.79E-08 | 0.3376864 | 0.426 | 0.352 | 0.000430695 | 2.3 | SARAF     | 1.210227273 |
| SDHC3          | 1.79E-08 | 0.3520249 | 0.229 | 0.162 | 0.000432751 | 2.3 | SDHC      | 1.413580247 |
| UBE2N3         | 1.80E-08 | 0.3861514 | 0.272 | 0.203 | 0.000434787 | 2.3 | UBE2N     | 1.339901478 |
| NFIL32         | 1.83E-08 | 0.3270154 | 0.26  | 0.187 | 0.000442421 | 2.3 | NFIL3     | 1.390374332 |



|                |          |           |       |       |             |     |           |             |
|----------------|----------|-----------|-------|-------|-------------|-----|-----------|-------------|
| ZCWPW11        | 1.86E-08 | 0.1155258 | 0.028 | 0.008 | 0.000449151 | 2.3 | ZCWPW1    | 3.5         |
| ADGRV11        | 1.93E-08 | 0.4129951 | 0.233 | 0.164 | 0.000464853 | 2.3 | ADGRV1    | 1.420731707 |
| RAB3D1         | 1.96E-08 | 0.203761  | 0.07  | 0.032 | 0.000473769 | 2.3 | RAB3D     | 2.1875      |
| MALRD12        | 2.00E-08 | 0.2711673 | 0.088 | 0.044 | 0.000483137 | 2.3 | MALRD1    | 2           |
| MARCH2         | 2.01E-08 | 0.1954577 | 0.086 | 0.043 | 0.000483897 | 2.3 | MARCH2    | 2           |
| TFF32          | 2.09E-08 | 0.3969653 | 0.108 | 0.058 | 0.000503292 | 2.3 | TFF3      | 1.862068966 |
| RPGRIP1L1      | 2.10E-08 | 0.1155534 | 0.031 | 0.01  | 0.000506364 | 2.3 | RPGRIP1L  | 3.1         |
| KHDRBS31       | 2.20E-08 | 0.3479829 | 0.192 | 0.126 | 0.000529665 | 2.3 | KHDRBS3   | 1.523809524 |
| KIAA0586       | 2.22E-08 | 0.3215452 | 0.143 | 0.087 | 0.000534219 | 2.3 | KIAA0586  | 1.643678161 |
| C1GALT1C11     | 2.27E-08 | 0.2490793 | 0.096 | 0.05  | 0.000546946 | 2.3 | C1GALT1C1 | 1.92        |
| AC007365.1     | 2.27E-08 | 0.1112687 | 0.021 | 0.005 | 0.000547722 | 2.3 | AC007365. | 4.2         |
| RP11-420A23.11 | 2.32E-08 | 0.2649353 | 0.088 | 0.045 | 0.00056044  | 2.3 | RP11-420A | 1.955555556 |
| POLR2G2        | 2.50E-08 | 0.3614404 | 0.24  | 0.173 | 0.000602149 | 2.3 | POLR2G    | 1.387283237 |
| ZC3H12A1       | 2.52E-08 | 0.3142133 | 0.119 | 0.067 | 0.000608084 | 2.3 | ZC3H12A   | 1.776119403 |
| PTPRN2         | 2.60E-08 | 0.1862315 | 0.037 | 0.012 | 0.000627207 | 2.3 | PTPRN2    | 3.083333333 |
| ZNF844         | 2.62E-08 | 0.2348469 | 0.098 | 0.052 | 0.000632702 | 2.3 | ZNF844    | 1.884615385 |
| C2orf743       | 2.63E-08 | 0.2183983 | 0.073 | 0.034 | 0.00063345  | 2.3 | C2orf74   | 2.147058824 |
| ANKRD281       | 2.68E-08 | 0.4596929 | 0.392 | 0.327 | 0.000645842 | 2.3 | ANKRD28   | 1.198776758 |
| DLC12          | 2.83E-08 | 0.2945626 | 0.115 | 0.064 | 0.000683554 | 2.3 | DLC1      | 1.796875    |
| RP11-689B22.21 | 2.99E-08 | 0.2443879 | 0.02  | 0.005 | 0.000721947 | 2.3 | RP11-689B | 4           |
| FGD5-AS11      | 3.03E-08 | 0.2724612 | 0.103 | 0.055 | 0.00073107  | 2.3 | FGD5-AS1  | 1.872727273 |
| IKZF3          | 3.14E-08 | 0.1027923 | 0.027 | 0.008 | 0.000756523 | 2.3 | IKZF3     | 3.375       |
| PLBD1          | 3.24E-08 | 0.1104065 | 0.032 | 0.01  | 0.000782255 | 2.3 | PLBD1     | 3.2         |
| INTS123        | 3.52E-08 | 0.3964921 | 0.281 | 0.209 | 0.000849128 | 2.3 | INTS12    | 1.344497608 |
| ARL32          | 3.69E-08 | 0.3456897 | 0.337 | 0.257 | 0.000890788 | 2.3 | ARL3      | 1.311284047 |
| SNRPE5         | 3.76E-08 | 0.4199144 | 0.563 | 0.521 | 0.000907171 | 2.3 | SNRPE     | 1.080614203 |
| RP11-596C23.6  | 3.89E-08 | 0.4476442 | 0.046 | 0.018 | 0.000938675 | 2.3 | RP11-596C | 2.555555556 |
| WBSCR22        | 4.07E-08 | 0.1628359 | 0.072 | 0.034 | 0.000981491 | 2.3 | WBSCR22   | 2.117647059 |
| PDIA33         | 4.08E-08 | 0.2824419 | 0.381 | 0.306 | 0.000984259 | 2.3 | PDIA3     | 1.245098039 |
| RP11-1035H13.3 | 4.13E-08 | 0.1016646 | 0.025 | 0.007 | 0.000994737 | 2.3 | RP11-1035 | 3.571428571 |
| CARS2          | 4.16E-08 | 0.3020122 | 0.104 | 0.057 | 0.001002727 | 2.3 | CARS2     | 1.824561404 |
| LURAP1L-AS12   | 4.18E-08 | 0.381806  | 0.145 | 0.09  | 0.001008163 | 2.3 | LURAP1L-A | 1.611111111 |
| FAM177A11      | 4.30E-08 | 0.2710154 | 0.188 | 0.124 | 0.001037053 | 2.3 | FAM177A1  | 1.516129032 |
| GUSB2          | 4.52E-08 | 0.180973  | 0.088 | 0.045 | 0.001090447 | 2.3 | GUSB      | 1.955555556 |
| DNAH11         | 4.53E-08 | 0.2047867 | 0.094 | 0.049 | 0.001092179 | 2.3 | DNAH11    | 1.918367347 |
| GFM11          | 4.66E-08 | 0.2437889 | 0.098 | 0.053 | 0.001124486 | 2.3 | GFM1      | 1.849056604 |
| PTPN62         | 4.88E-08 | 0.233915  | 0.086 | 0.044 | 0.001175572 | 2.3 | PTPN6     | 1.954545455 |
| CADM2          | 4.88E-08 | 0.2028779 | 0.062 | 0.027 | 0.001176282 | 2.3 | CADM2     | 2.296296296 |
| SELT1          | 4.90E-08 | 0.2702572 | 0.129 | 0.076 | 0.001182126 | 2.3 | SELT      | 1.697368421 |
| C3orf522       | 5.01E-08 | 0.2179186 | 0.236 | 0.16  | 0.001206972 | 2.3 | C3orf52   | 1.475       |
| MAPK61         | 5.11E-08 | 0.3534517 | 0.344 | 0.272 | 0.001232837 | 2.3 | MAPK6     | 1.264705882 |
| MAP1LC3B       | 5.15E-08 | 0.3312281 | 0.221 | 0.153 | 0.001241089 | 2.3 | MAP1LC3B  | 1.444444444 |
| RP11-779O18.32 | 5.53E-08 | 0.3558866 | 0.316 | 0.243 | 0.001332741 | 2.3 | RP11-779O | 1.300411523 |
| ICE21          | 5.54E-08 | 0.2686971 | 0.094 | 0.05  | 0.001335968 | 2.3 | ICE2      | 1.88        |
| ITPR12         | 5.74E-08 | 0.3044873 | 0.16  | 0.101 | 0.001382894 | 2.3 | ITPR1     | 1.584158416 |
| PSAP1          | 5.89E-08 | 0.3680449 | 0.184 | 0.121 | 0.001421288 | 2.3 | PSAP      | 1.520661157 |
| TIMM17A3       | 6.12E-08 | 0.3565167 | 0.287 | 0.219 | 0.00147546  | 2.3 | TIMM17A   | 1.310502283 |
| INO80D1        | 6.16E-08 | 0.2205391 | 0.654 | 0.566 | 0.001485057 | 2.3 | INO80D    | 1.155477032 |
| MCL11          | 6.22E-08 | 0.405461  | 0.388 | 0.325 | 0.001499332 | 2.3 | MCL1      | 1.193846154 |
| CTB-161M19.4   | 6.36E-08 | 0.1482194 | 0.038 | 0.014 | 0.001534157 | 2.3 | CTB-161M  | 2.714285714 |
| GKAP1          | 6.43E-08 | 0.2161417 | 0.058 | 0.025 | 0.001549723 | 2.3 | GKAP1     | 2.32        |
| CTD-2410N18.5  | 6.46E-08 | 0.1659196 | 0.062 | 0.028 | 0.001558762 | 2.3 | CTD-2410N | 2.214285714 |

|               |          |           |       |       |             |     |           |             |
|---------------|----------|-----------|-------|-------|-------------|-----|-----------|-------------|
| HADHB2        | 6.47E-08 | 0.3750518 | 0.338 | 0.273 | 0.001559306 | 2.3 | HADHB     | 1.238095238 |
| SPOCK1        | 6.58E-08 | 0.1667122 | 0.044 | 0.017 | 0.001586259 | 2.3 | SPOCK1    | 2.588235294 |
| SLC35A13      | 6.89E-08 | 0.177857  | 0.066 | 0.031 | 0.001660214 | 2.3 | SLC35A1   | 2.129032258 |
| GSG1L1        | 7.11E-08 | 0.3144978 | 0.044 | 0.017 | 0.001715233 | 2.3 | GSG1L     | 2.588235294 |
| YME1L11       | 7.12E-08 | 0.3644689 | 0.337 | 0.269 | 0.001717934 | 2.3 | YME1L1    | 1.252788104 |
| CABYR         | 7.18E-08 | 0.2068732 | 0.044 | 0.017 | 0.001731369 | 2.3 | CABYR     | 2.588235294 |
| FAM216A       | 7.42E-08 | 0.1009366 | 0.035 | 0.012 | 0.001789703 | 2.3 | FAM216A   | 2.916666667 |
| MRPS301       | 7.51E-08 | 0.1670137 | 0.052 | 0.022 | 0.001812004 | 2.3 | MRPS30    | 2.363636364 |
| ERMP1         | 7.56E-08 | 0.2077436 | 0.097 | 0.052 | 0.001823574 | 2.3 | ERMP1     | 1.865384615 |
| STAG22        | 7.60E-08 | 0.329682  | 0.423 | 0.355 | 0.001832294 | 2.3 | STAG2     | 1.191549296 |
| RTN31         | 7.72E-08 | 0.3537818 | 0.278 | 0.211 | 0.001860331 | 2.3 | RTN3      | 1.317535545 |
| FLJ37453      | 7.77E-08 | 0.1191716 | 0.034 | 0.011 | 0.00187441  | 2.3 | FLJ37453  | 3.090909091 |
| NHSL23        | 8.74E-08 | 0.326344  | 0.346 | 0.278 | 0.002106802 | 2.3 | NHSL2     | 1.244604317 |
| JTB2          | 8.79E-08 | 0.2384897 | 0.094 | 0.051 | 0.002119363 | 2.3 | JTB       | 1.843137255 |
| RP11-91P24.71 | 9.26E-08 | 0.2628589 | 0.084 | 0.044 | 0.002232271 | 2.3 | RP11-91P2 | 1.909090909 |
| CPM2          | 9.63E-08 | 0.1922795 | 0.063 | 0.029 | 0.002322152 | 2.3 | CPM       | 2.172413793 |
| ZFP2          | 9.71E-08 | 0.1852001 | 0.083 | 0.042 | 0.002340215 | 2.3 | ZFP2      | 1.976190476 |
| MYOM11        | 9.76E-08 | 0.2778127 | 0.091 | 0.048 | 0.002352946 | 2.3 | MYOM1     | 1.895833333 |
| TMED22        | 9.88E-08 | 0.3473255 | 0.261 | 0.195 | 0.002381198 | 2.3 | TMED2     | 1.338461538 |
| ELMOD21       | 9.96E-08 | 0.2836395 | 0.111 | 0.064 | 0.00240071  | 2.3 | ELMOD2    | 1.734375    |
| LRGUK         | 1.01E-07 | 0.1834999 | 0.051 | 0.021 | 0.002427009 | 2.3 | LRGUK     | 2.428571429 |
| DPH6-AS11     | 1.04E-07 | 0.188624  | 0.055 | 0.024 | 0.002507131 | 2.3 | DPH6-AS1  | 2.291666667 |
| SLC25A172     | 1.04E-07 | 0.2441162 | 0.098 | 0.053 | 0.002512048 | 2.3 | SLC25A17  | 1.849056604 |
| ISCA1         | 1.05E-07 | 0.1859443 | 0.083 | 0.042 | 0.002533505 | 2.3 | ISCA1     | 1.976190476 |
| HSPA131       | 1.05E-07 | 0.2088939 | 0.097 | 0.052 | 0.002534748 | 2.3 | HSPA13    | 1.865384615 |
| DLG51         | 1.06E-07 | 0.2907353 | 0.343 | 0.262 | 0.002559401 | 2.3 | DLG5      | 1.309160305 |
| NOLC11        | 1.09E-07 | 0.2591205 | 0.125 | 0.074 | 0.002634618 | 2.3 | NOLC1     | 1.689189189 |
| ABRACL2       | 1.11E-07 | 0.399021  | 0.471 | 0.422 | 0.00267015  | 2.3 | ABRACL    | 1.116113744 |
| FAM81B2       | 1.12E-07 | 0.1358353 | 0.042 | 0.016 | 0.002693331 | 2.3 | FAM81B    | 2.625       |
| CYTH32        | 1.13E-07 | 0.3539103 | 0.177 | 0.115 | 0.002735742 | 2.3 | CYTH3     | 1.539130435 |
| TDRD9         | 1.17E-07 | 0.1456622 | 0.044 | 0.017 | 0.002827687 | 2.3 | TDRD9     | 2.588235294 |
| GATAD2A2      | 1.23E-07 | 0.2963498 | 0.218 | 0.152 | 0.002964368 | 2.3 | GATAD2A   | 1.434210526 |
| EIF2B32       | 1.27E-07 | 0.2756968 | 0.107 | 0.061 | 0.003065898 | 2.3 | EIF2B3    | 1.754098361 |
| AC019117.2    | 1.31E-07 | 0.1092493 | 0.018 | 0.004 | 0.003147858 | 2.3 | AC019117. | 4.5         |
| GSTA43        | 1.31E-07 | 0.249789  | 0.103 | 0.057 | 0.00315316  | 2.3 | GSTA4     | 1.807017544 |
| HSPA1B2       | 1.35E-07 | 0.2641155 | 0.114 | 0.065 | 0.003253582 | 2.3 | HSPA1B    | 1.753846154 |
| IRS21         | 1.39E-07 | 0.4169235 | 0.386 | 0.321 | 0.003360323 | 2.3 | IRS2      | 1.202492212 |
| FAM126A2      | 1.41E-07 | 0.1730931 | 0.063 | 0.029 | 0.003394979 | 2.3 | FAM126A   | 2.172413793 |
| HSPA83        | 1.45E-07 | 0.4345906 | 0.513 | 0.457 | 0.00350233  | 2.3 | HSPA8     | 1.122538293 |
| CASK1         | 1.52E-07 | 0.3279102 | 0.441 | 0.371 | 0.003661409 | 2.3 | CASK      | 1.188679245 |
| NRP11         | 1.53E-07 | 0.199196  | 0.107 | 0.059 | 0.00369738  | 2.3 | NRP1      | 1.813559322 |
| SELENBP11     | 1.65E-07 | 0.1344769 | 0.041 | 0.015 | 0.003969192 | 2.3 | SELENBP1  | 2.733333333 |
| CATSPERB2     | 1.77E-07 | 0.3398958 | 0.272 | 0.203 | 0.004260424 | 2.3 | CATSPERB  | 1.339901478 |
| ADIPOR2       | 1.81E-07 | 0.3324401 | 0.126 | 0.077 | 0.004357367 | 2.3 | ADIPOR2   | 1.636363636 |
| ZMPSTE241     | 1.81E-07 | 0.2070035 | 0.124 | 0.073 | 0.004375785 | 2.3 | ZMPSTE24  | 1.698630137 |
| G3BP12        | 1.83E-07 | 0.3224568 | 0.228 | 0.164 | 0.004422657 | 2.3 | G3BP1     | 1.390243902 |
| SNRPG3        | 1.86E-07 | 0.3249104 | 0.562 | 0.517 | 0.004495622 | 2.3 | SNRPG     | 1.087040619 |
| ASMTL         | 1.88E-07 | 0.1937504 | 0.053 | 0.023 | 0.004521741 | 2.3 | ASMTL     | 2.304347826 |
| RUFY1         | 1.94E-07 | 0.3302561 | 0.16  | 0.104 | 0.004673899 | 2.3 | RUFY1     | 1.538461538 |
| ZNF983        | 1.99E-07 | 0.3328401 | 0.146 | 0.093 | 0.004799826 | 2.3 | ZNF98     | 1.569892473 |
| LINC011701    | 2.27E-07 | 0.1712292 | 0.066 | 0.031 | 0.00547776  | 2.3 | LINC01170 | 2.129032258 |
| CAP11         | 2.36E-07 | 0.3757609 | 0.337 | 0.276 | 0.005693599 | 2.3 | CAP1      | 1.221014493 |

|                |          |           |       |       |             |     |            |             |
|----------------|----------|-----------|-------|-------|-------------|-----|------------|-------------|
| TGM32          | 2.51E-07 | 0.4305657 | 0.053 | 0.023 | 0.006041945 | 2.3 | TGM3       | 2.304347826 |
| BAIAP2         | 2.54E-07 | 0.1448837 | 0.046 | 0.019 | 0.006128177 | 2.3 | BAIAP2     | 2.421052632 |
| LRRFIP13       | 2.55E-07 | 0.2748227 | 0.678 | 0.63  | 0.006144709 | 2.3 | LRRFIP1    | 1.076190476 |
| CANX2          | 2.56E-07 | 0.3644249 | 0.397 | 0.338 | 0.006184326 | 2.3 | CANX       | 1.174556213 |
| TPP1           | 2.64E-07 | 0.1741585 | 0.077 | 0.039 | 0.006373864 | 2.3 | TPP1       | 1.974358974 |
| MEGF92         | 2.78E-07 | 0.3393448 | 0.194 | 0.132 | 0.006697156 | 2.3 | MEGF9      | 1.46969697  |
| LAMTOR31       | 2.86E-07 | 0.3088332 | 0.218 | 0.156 | 0.006887359 | 2.3 | LAMTOR3    | 1.397435897 |
| KLF92          | 2.87E-07 | 0.3342723 | 0.213 | 0.152 | 0.006911093 | 2.3 | KLF9       | 1.401315789 |
| SERPINI11      | 2.87E-07 | 0.1012828 | 0.027 | 0.008 | 0.006921506 | 2.3 | SERPINI1   | 3.375       |
| NSUN72         | 2.89E-07 | 0.293878  | 0.107 | 0.062 | 0.00697254  | 2.3 | NSUN7      | 1.725806452 |
| CREM           | 3.09E-07 | 0.3499684 | 0.154 | 0.099 | 0.007441231 | 2.3 | CREM       | 1.555555556 |
| GOLM11         | 3.12E-07 | 0.3093592 | 0.306 | 0.233 | 0.007524383 | 2.3 | GOLM1      | 1.313304721 |
| GLI32          | 3.14E-07 | 0.2801895 | 0.198 | 0.135 | 0.007577674 | 2.3 | GLI3       | 1.466666667 |
| DNASE1L1       | 3.15E-07 | 0.1132835 | 0.035 | 0.013 | 0.00759743  | 2.3 | DNASE1L1   | 2.692307692 |
| SLC45A2        | 3.23E-07 | 0.1003412 | 0.035 | 0.013 | 0.007779144 | 2.3 | SLC45A2    | 2.692307692 |
| DCD1           | 3.40E-07 | 1.238073  | 0.015 | 0.003 | 0.008196803 | 2.3 | DCD        | 5           |
| MRPS281        | 3.61E-07 | 0.1531464 | 0.059 | 0.027 | 0.008716486 | 2.3 | MRPS28     | 2.185185185 |
| RP11-462L8.1   | 3.63E-07 | 0.1013259 | 0.02  | 0.005 | 0.008762209 | 2.3 | RP11-462L8 | 4           |
| FRZB1          | 3.71E-07 | 0.1007727 | 0.037 | 0.014 | 0.008950051 | 2.3 | FRZB       | 2.642857143 |
| RP11-654A16.3  | 3.73E-07 | 0.1618918 | 0.053 | 0.024 | 0.00900264  | 2.3 | RP11-654A  | 2.208333333 |
| ZC3H42         | 3.96E-07 | 0.2054807 | 0.066 | 0.032 | 0.009553773 | 2.3 | ZC3H4      | 2.0625      |
| CORIN1         | 4.15E-07 | 0.1226993 | 0.049 | 0.021 | 0.01001172  | 2.3 | CORIN      | 2.333333333 |
| MMD            | 4.35E-07 | 0.1626653 | 0.058 | 0.027 | 0.01049655  | 2.3 | MMD        | 2.148148148 |
| TP53TG11       | 4.39E-07 | 0.1099986 | 0.038 | 0.014 | 0.01058743  | 2.3 | TP53TG1    | 2.714285714 |
| KIAA08251      | 4.50E-07 | 0.2301548 | 0.147 | 0.094 | 0.01084365  | 2.3 | KIAA0825   | 1.563829787 |
| EI242          | 4.57E-07 | 0.256221  | 0.126 | 0.078 | 0.01102546  | 2.3 | EI24       | 1.615384615 |
| ADGRL32        | 4.58E-07 | 0.1695238 | 0.167 | 0.107 | 0.01104488  | 2.3 | ADGRL3     | 1.560747664 |
| ZSWIM51        | 4.60E-07 | 0.1691078 | 0.058 | 0.026 | 0.01109054  | 2.3 | ZSWIM5     | 2.230769231 |
| TRIM291        | 4.82E-07 | 0.250522  | 0.098 | 0.055 | 0.01161178  | 2.3 | TRIM29     | 1.781818182 |
| UBL31          | 5.04E-07 | 0.3683881 | 0.265 | 0.201 | 0.01214443  | 2.3 | UBL3       | 1.31840796  |
| WDSUB12        | 5.15E-07 | 0.2024277 | 0.097 | 0.054 | 0.01242305  | 2.3 | WDSUB1     | 1.796296296 |
| AP1M21         | 5.39E-07 | 0.2035814 | 0.128 | 0.078 | 0.01300231  | 2.3 | AP1M2      | 1.641025641 |
| CLIC11         | 5.43E-07 | 0.2865216 | 0.614 | 0.594 | 0.01309927  | 2.3 | CLIC1      | 1.033670034 |
| TIAM23         | 5.64E-07 | 0.3799511 | 0.289 | 0.228 | 0.01358955  | 2.3 | TIAM2      | 1.26754386  |
| ST6GALNAC22    | 5.88E-07 | 0.1568653 | 0.056 | 0.026 | 0.01417449  | 2.3 | ST6GALNA   | 2.153846154 |
| C21            | 6.25E-07 | 0.212425  | 0.051 | 0.022 | 0.01506128  | 2.3 | C2         | 2.318181818 |
| MYO102         | 6.28E-07 | 0.3448723 | 0.315 | 0.253 | 0.01513264  | 2.3 | MYO10      | 1.245059289 |
| BAZ1A2         | 6.31E-07 | 0.4106888 | 0.437 | 0.384 | 0.01520903  | 2.3 | BAZ1A      | 1.138020833 |
| MRPS231        | 6.41E-07 | 0.1901909 | 0.076 | 0.039 | 0.01544833  | 2.3 | MRPS23     | 1.948717949 |
| DSP1           | 6.73E-07 | 0.3228693 | 0.417 | 0.354 | 0.01622221  | 2.3 | DSP        | 1.177966102 |
| NFKB13         | 6.77E-07 | 0.3256743 | 0.506 | 0.45  | 0.0163195   | 2.3 | NFKB1      | 1.124444444 |
| SRSF124        | 7.14E-07 | 0.2094062 | 0.079 | 0.041 | 0.01720972  | 2.3 | SRSF12     | 1.926829268 |
| RHOBTB32       | 7.20E-07 | 0.26719   | 0.192 | 0.132 | 0.01736169  | 2.3 | RHOBTB3    | 1.454545455 |
| ZCCHC14        | 7.25E-07 | 0.3343464 | 0.114 | 0.069 | 0.01749259  | 2.3 | ZCCHC14    | 1.652173913 |
| SF3B64         | 7.54E-07 | 0.2566292 | 0.638 | 0.608 | 0.01817614  | 2.3 | SF3B6      | 1.049342105 |
| NUP1071        | 7.88E-07 | 0.4549244 | 0.23  | 0.174 | 0.01900541  | 2.3 | NUP107     | 1.32183908  |
| NDUFV21        | 8.17E-07 | 0.3534967 | 0.336 | 0.271 | 0.01970249  | 2.3 | NDUFV2     | 1.239852399 |
| RP11-372K14.21 | 8.44E-07 | 0.1505972 | 0.058 | 0.027 | 0.02035882  | 2.3 | RP11-372K  | 2.148148148 |
| SNRPD32        | 8.47E-07 | 0.3636246 | 0.381 | 0.324 | 0.02043294  | 2.3 | SNRPD3     | 1.175925926 |
| RER1           | 8.67E-07 | 0.142564  | 0.045 | 0.019 | 0.02091047  | 2.3 | RER1       | 2.368421053 |
| RHOA1          | 8.79E-07 | 0.2943153 | 0.469 | 0.42  | 0.02118336  | 2.3 | RHOA       | 1.116666667 |
| C7orf50        | 8.80E-07 | 0.1953665 | 0.032 | 0.012 | 0.02121806  | 2.3 | C7orf50    | 2.666666667 |

|                |          |           |       |       |            |     |           |             |
|----------------|----------|-----------|-------|-------|------------|-----|-----------|-------------|
| RP11-539L10.32 | 8.90E-07 | 0.1602873 | 0.063 | 0.031 | 0.02144906 | 2.3 | RP11-539L | 2.032258065 |
| SYDE21         | 9.90E-07 | 0.2011274 | 0.051 | 0.023 | 0.02386084 | 2.3 | SYDE2     | 2.217391304 |
| ZNF1011        | 9.95E-07 | 0.1157599 | 0.042 | 0.017 | 0.02399137 | 2.3 | ZNF101    | 2.470588235 |
| OSTC4          | 1.00E-06 | 0.2912286 | 0.507 | 0.458 | 0.02410943 | 2.3 | OSTC      | 1.1069869   |
| KCTD2          | 1.00E-06 | 0.1344455 | 0.046 | 0.02  | 0.02410957 | 2.3 | KCTD2     | 2.3         |
| MEGF81         | 1.00E-06 | 0.1211548 | 0.032 | 0.012 | 0.02419852 | 2.3 | MEGF8     | 2.666666667 |
| KIAA1841       | 1.02E-06 | 0.2000483 | 0.083 | 0.045 | 0.02455087 | 2.3 | KIAA1841  | 1.844444444 |
| H3F3A          | 1.04E-06 | 0.1458233 | 0.072 | 0.037 | 0.02504649 | 2.3 | H3F3A     | 1.945945946 |
| PPP1R15A2      | 1.04E-06 | 0.2127961 | 0.063 | 0.031 | 0.02516522 | 2.3 | PPP1R15A  | 2.032258065 |
| TEAD12         | 1.05E-06 | 0.3847916 | 0.507 | 0.452 | 0.02525333 | 2.3 | TEAD1     | 1.121681416 |
| ITGAV2         | 1.05E-06 | 0.2202683 | 0.478 | 0.399 | 0.02536046 | 2.3 | ITGAV     | 1.197994987 |
| LINC003242     | 1.07E-06 | 0.1696406 | 0.056 | 0.026 | 0.02570374 | 2.3 | LINC00324 | 2.153846154 |
| ATF41          | 1.07E-06 | 0.3975574 | 0.438 | 0.396 | 0.025742   | 2.3 | ATF4      | 1.106060606 |
| FCGRT          | 1.11E-06 | 0.1066687 | 0.041 | 0.017 | 0.02673321 | 2.3 | FCGRT     | 2.411764706 |
| GMPR3          | 1.12E-06 | 0.1239942 | 0.028 | 0.01  | 0.02708763 | 2.3 | GMPR      | 2.8         |
| GSTO23         | 1.13E-06 | 0.2683884 | 0.146 | 0.095 | 0.02723568 | 2.3 | GSTO2     | 1.536842105 |
| PTPRK1         | 1.16E-06 | 0.4501858 | 0.751 | 0.773 | 0.02789268 | 2.3 | PTPRK     | 0.971539457 |
| TCTA1          | 1.17E-06 | 0.1926186 | 0.028 | 0.01  | 0.02825501 | 2.3 | TCTA      | 2.8         |
| HNRNPF         | 1.17E-06 | 0.3050899 | 0.216 | 0.159 | 0.02831499 | 2.3 | HNRNPF    | 1.358490566 |
| MAF            | 1.21E-06 | 0.1072123 | 0.027 | 0.009 | 0.02911086 | 2.3 | MAF       | 3           |
| ENTPD3-AS11    | 1.21E-06 | 0.1695183 | 0.053 | 0.025 | 0.02916221 | 2.3 | ENTPD3-AS | 2.12        |
| TMEM30B        | 1.21E-06 | 0.2798288 | 0.104 | 0.061 | 0.02926886 | 2.3 | TMEM30B   | 1.704918033 |
| NGFRAP13       | 1.22E-06 | 0.2069517 | 0.08  | 0.043 | 0.02936713 | 2.3 | NGFRAP1   | 1.860465116 |
| CDKN2AIP1      | 1.22E-06 | 0.1871077 | 0.056 | 0.026 | 0.02945466 | 2.3 | CDKN2AIP  | 2.153846154 |
| CMTM62         | 1.24E-06 | 0.3489326 | 0.36  | 0.302 | 0.02978065 | 2.3 | CMTM6     | 1.19205298  |
| SEMA3C1        | 1.25E-06 | 0.2272723 | 0.358 | 0.279 | 0.03024392 | 2.3 | SEMA3C    | 1.283154122 |
| EAF21          | 1.29E-06 | 0.1416282 | 0.046 | 0.02  | 0.03103326 | 2.3 | EAF2      | 2.3         |
| SSBP3          | 1.37E-06 | 0.2775033 | 0.181 | 0.125 | 0.03298198 | 2.3 | SSBP3     | 1.448       |
| CLIP1-AS11     | 1.38E-06 | 0.1114871 | 0.039 | 0.016 | 0.03334788 | 2.3 | CLIP1-AS1 | 2.4375      |
| HS6ST1         | 1.40E-06 | 0.1538394 | 0.056 | 0.027 | 0.03379044 | 2.3 | HS6ST1    | 2.074074074 |
| CDH41          | 1.44E-06 | 0.1494289 | 0.041 | 0.017 | 0.03477552 | 2.3 | CDH4      | 2.411764706 |
| MLEC2          | 1.47E-06 | 0.305907  | 0.128 | 0.081 | 0.035538   | 2.3 | MLEC      | 1.580246914 |
| IRF2BP22       | 1.52E-06 | 0.3659781 | 0.185 | 0.131 | 0.03666976 | 2.3 | IRF2BP2   | 1.41221374  |
| CACNA1B1       | 1.66E-06 | 0.2129149 | 0.028 | 0.01  | 0.04000637 | 2.3 | CACNA1B   | 2.8         |
| MAP91          | 1.66E-06 | 0.1521589 | 0.053 | 0.025 | 0.04002426 | 2.3 | MAP9      | 2.12        |
| FAM210B2       | 1.70E-06 | 0.2181738 | 0.104 | 0.062 | 0.04094615 | 2.3 | FAM210B   | 1.677419355 |
| TMEM602        | 1.73E-06 | 0.3193922 | 0.152 | 0.103 | 0.04163196 | 2.3 | TMEM60    | 1.475728155 |
| BCAP31         | 1.73E-06 | 0.2599539 | 0.145 | 0.095 | 0.04164001 | 2.3 | BCAP31    | 1.526315789 |
| GGCX1          | 1.75E-06 | 0.2081535 | 0.06  | 0.029 | 0.04225333 | 2.3 | GGCX      | 2.068965517 |
| MFSD2A1        | 1.76E-06 | 0.1021907 | 0.045 | 0.019 | 0.04246027 | 2.3 | MFSD2A    | 2.368421053 |
| POMP3          | 1.76E-06 | 0.2930015 | 0.653 | 0.632 | 0.04246166 | 2.3 | POMP      | 1.033227848 |
| GLO11          | 1.78E-06 | 0.3579383 | 0.23  | 0.171 | 0.04281638 | 2.3 | GLO1      | 1.34502924  |
| SH2B3          | 1.82E-06 | 0.1072531 | 0.035 | 0.014 | 0.04394405 | 2.3 | SH2B3     | 2.5         |
| TAT1           | 1.90E-06 | 0.1716851 | 0.031 | 0.011 | 0.04569935 | 2.3 | TAT       | 2.818181818 |
| PDCL31         | 1.90E-06 | 0.1973437 | 0.065 | 0.033 | 0.04578805 | 2.3 | PDCL3     | 1.96969697  |
| PAAF11         | 1.91E-06 | 0.1121211 | 0.055 | 0.026 | 0.04604536 | 2.3 | PAAF1     | 2.115384615 |
| EMC101         | 1.94E-06 | 0.2240686 | 0.101 | 0.06  | 0.04676301 | 2.3 | EMC10     | 1.683333333 |
| HNRNPH23       | 2.06E-06 | 0.379949  | 0.282 | 0.225 | 0.04955543 | 2.3 | HNRNPH2   | 1.253333333 |
| RPA31          | 2.06E-06 | 0.3031491 | 0.194 | 0.139 | 0.04960514 | 2.3 | RPA3      | 1.395683453 |
| RP11-12M5.41   | 2.06E-06 | 0.1020419 | 0.041 | 0.017 | 0.04967719 | 2.3 | RP11-12M5 | 2.411764706 |
| LINC009983     | 2.06E-06 | 0.4015914 | 0.18  | 0.129 | 0.04973329 | 2.3 | LINC00998 | 1.395348837 |
| GLCCI12        | 0        | 1.611337  | 0.689 | 0.236 | 0          | 2.4 | GLCCI1    | 2.919491525 |

|            |           |           |       |       |           |     |           |             |
|------------|-----------|-----------|-------|-------|-----------|-----|-----------|-------------|
| SYTL21     | 0         | 1.482382  | 0.857 | 0.383 | 0         | 2.4 | SYTL2     | 2.237597911 |
| FGF132     | 0         | 1.331415  | 0.787 | 0.396 | 0         | 2.4 | FGF13     | 1.987373737 |
| INPP4B2    | 0         | 1.252113  | 0.678 | 0.27  | 0         | 2.4 | INPP4B    | 2.511111111 |
| SLC38A22   | 0         | 1.235389  | 0.678 | 0.332 | 0         | 2.4 | SLC38A2   | 2.042168675 |
| RAB11FIP12 | 0         | 1.229003  | 0.96  | 0.696 | 0         | 2.4 | RAB11FIP1 | 1.379310345 |
| CPEB23     | 0         | 1.188119  | 0.611 | 0.259 | 0         | 2.4 | CPEB2     | 2.359073359 |
| TFPI3      | 0         | 1.104141  | 0.641 | 0.273 | 0         | 2.4 | TFPI      | 2.347985348 |
| OSBPL31    | 0         | 1.076053  | 0.52  | 0.183 | 0         | 2.4 | OSBPL3    | 2.841530055 |
| SAT1       | 0         | 1.060056  | 0.995 | 0.978 | 0         | 2.4 | SAT1      | 1.017382413 |
| MYL12B3    | 0         | 1.054367  | 0.935 | 0.801 | 0         | 2.4 | MYL12B    | 1.167290886 |
| BCAR31     | 0         | 1.048912  | 0.564 | 0.232 | 0         | 2.4 | BCAR3     | 2.431034483 |
| ATP1B1     | 0         | 1.047076  | 0.928 | 0.734 | 0         | 2.4 | ATP1B1    | 1.264305177 |
| EIF4G31    | 0         | 1.041572  | 0.803 | 0.462 | 0         | 2.4 | EIF4G3    | 1.738095238 |
| TMSB4X1    | 0         | 1.037931  | 0.976 | 0.93  | 0         | 2.4 | TMSB4X    | 1.049462366 |
| AREG3      | 0         | 1.029026  | 0.784 | 0.396 | 0         | 2.4 | AREG      | 1.97979798  |
| GOLM12     | 0         | 1.027068  | 0.52  | 0.186 | 0         | 2.4 | GOLM1     | 2.795698925 |
| MALAT13    | 0         | 0.7688858 | 1     | 1     | 0         | 2.4 | MALAT1    | 1           |
| TANC21     | 2.69E-300 | 0.8873912 | 0.751 | 0.431 | 6.48E-296 | 2.4 | TANC2     | 1.742459397 |
| NEBL1      | 1.94E-289 | 0.8810169 | 0.869 | 0.629 | 4.68E-285 | 2.4 | NEBL      | 1.381558029 |
| PRSS231    | 6.08E-277 | 0.9352703 | 0.465 | 0.181 | 1.47E-272 | 2.4 | PRSS23    | 2.569060773 |
| S100A6     | 1.29E-276 | 1.494481  | 0.792 | 0.537 | 3.10E-272 | 2.4 | S100A6    | 1.474860335 |
| THRB1      | 5.17E-273 | 0.9804703 | 0.706 | 0.419 | 1.25E-268 | 2.4 | THRB      | 1.6849642   |
| ITGAV3     | 2.25E-272 | 0.8765742 | 0.668 | 0.355 | 5.42E-268 | 2.4 | ITGAV     | 1.881690141 |
| PPARG1     | 4.20E-271 | 0.8905059 | 0.364 | 0.121 | 1.01E-266 | 2.4 | PPARG     | 3.008264463 |
| STK391     | 1.77E-267 | 0.7997393 | 0.486 | 0.198 | 4.26E-263 | 2.4 | STK39     | 2.454545455 |
| AIM11      | 4.56E-263 | 0.9552681 | 0.69  | 0.405 | 1.10E-258 | 2.4 | AIM1      | 1.703703704 |
| ERBB43     | 1.54E-258 | 0.76665   | 0.792 | 0.443 | 3.72E-254 | 2.4 | ERBB4     | 1.787810384 |
| ALCAM3     | 2.93E-256 | 0.8053862 | 0.796 | 0.465 | 7.07E-252 | 2.4 | ALCAM     | 1.711827957 |
| PTPRK2     | 2.07E-254 | 0.7676051 | 0.914 | 0.747 | 4.99E-250 | 2.4 | PTPRK     | 1.22356091  |
| LRBA2      | 5.75E-254 | 0.8962122 | 0.841 | 0.605 | 1.39E-249 | 2.4 | LRBA      | 1.390082645 |
| C8orf43    | 6.66E-250 | 0.554947  | 0.817 | 0.47  | 1.61E-245 | 2.4 | C8orf4    | 1.738297872 |
| MRPS6      | 4.50E-243 | 1.170024  | 0.509 | 0.243 | 1.08E-238 | 2.4 | MRPS6     | 2.094650206 |
| MAML3      | 7.33E-242 | 1.054122  | 0.586 | 0.312 | 1.77E-237 | 2.4 | MAML3     | 1.878205128 |
| SOX42      | 3.34E-240 | 0.8315687 | 0.945 | 0.821 | 8.05E-236 | 2.4 | SOX4      | 1.151035323 |
| FUT83      | 1.16E-239 | 0.9501374 | 0.492 | 0.222 | 2.79E-235 | 2.4 | FUT8      | 2.216216216 |
| TACSTD21   | 3.54E-239 | 1.034005  | 0.865 | 0.708 | 8.54E-235 | 2.4 | TACSTD2   | 1.221751412 |
| SMIM143    | 7.36E-239 | 0.80862   | 0.647 | 0.358 | 1.77E-234 | 2.4 | SMIM14    | 1.80726257  |
| GNAS3      | 1.27E-238 | 0.7083435 | 0.896 | 0.729 | 3.06E-234 | 2.4 | GNAS      | 1.229080933 |
| DGKH1      | 2.02E-238 | 0.8649242 | 0.547 | 0.269 | 4.87E-234 | 2.4 | DGKH      | 2.033457249 |
| ANO61      | 4.98E-238 | 0.7932984 | 0.748 | 0.481 | 1.20E-233 | 2.4 | ANO6      | 1.555093555 |
| LPP1       | 1.74E-237 | 0.6596374 | 0.974 | 0.905 | 4.20E-233 | 2.4 | LPP       | 1.076243094 |
| MGLL1      | 3.00E-227 | 0.7631453 | 0.39  | 0.15  | 7.24E-223 | 2.4 | MGLL      | 2.6         |
| C16orf451  | 3.36E-211 | 0.8086169 | 0.442 | 0.193 | 8.11E-207 | 2.4 | C16orf45  | 2.29015544  |
| TMEM45B2   | 2.69E-210 | 0.6902295 | 0.359 | 0.133 | 6.49E-206 | 2.4 | TMEM45B   | 2.69924812  |
| TEAD13     | 5.00E-204 | 0.8237895 | 0.668 | 0.417 | 1.21E-199 | 2.4 | TEAD1     | 1.601918465 |
| KIF13A1    | 5.03E-201 | 0.9330868 | 0.612 | 0.359 | 1.21E-196 | 2.4 | KIF13A    | 1.704735376 |
| CACNA2D13  | 6.37E-197 | 0.8447212 | 0.336 | 0.128 | 1.54E-192 | 2.4 | CACNA2D1  | 2.625       |
| SEMA3C2    | 7.71E-197 | 0.6964658 | 0.505 | 0.243 | 1.86E-192 | 2.4 | SEMA3C    | 2.0781893   |
| MAL22      | 2.11E-196 | 0.8535018 | 0.561 | 0.32  | 5.09E-192 | 2.4 | MAL2      | 1.753125    |
| SLC27A43   | 3.66E-194 | 0.9188747 | 0.851 | 0.68  | 8.84E-190 | 2.4 | SLC27A4   | 1.251470588 |
| LIMCH11    | 1.29E-192 | 0.6961227 | 0.725 | 0.448 | 3.11E-188 | 2.4 | LIMCH1    | 1.618303571 |
| TPBG1      | 4.97E-190 | 0.7275479 | 0.369 | 0.153 | 1.20E-185 | 2.4 | TPBG      | 2.411764706 |

|           |           |           |       |       |           |     |          |             |
|-----------|-----------|-----------|-------|-------|-----------|-----|----------|-------------|
| SMAD32    | 6.97E-188 | 0.7886643 | 0.478 | 0.237 | 1.68E-183 | 2.4 | SMAD3    | 2.016877637 |
| TMEM1361  | 1.12E-186 | 0.6474136 | 0.231 | 0.067 | 2.70E-182 | 2.4 | TMEM136  | 3.447761194 |
| ZNF704    | 4.66E-186 | 0.7832699 | 0.338 | 0.136 | 1.12E-181 | 2.4 | ZNF704   | 2.485294118 |
| CPE3      | 1.01E-184 | 0.69414   | 0.403 | 0.172 | 2.45E-180 | 2.4 | CPE      | 2.343023256 |
| CD9       | 3.66E-184 | 0.8197529 | 0.591 | 0.353 | 8.82E-180 | 2.4 | CD9      | 1.674220963 |
| ARHGEF122 | 7.05E-184 | 0.7600926 | 0.763 | 0.546 | 1.70E-179 | 2.4 | ARHGEF12 | 1.397435897 |
| FRYL1     | 6.73E-183 | 0.7167201 | 0.608 | 0.362 | 1.62E-178 | 2.4 | FRYL     | 1.679558011 |
| CAPN82    | 1.13E-182 | 0.7392298 | 0.418 | 0.186 | 2.72E-178 | 2.4 | CAPN8    | 2.247311828 |
| HERC41    | 1.21E-182 | 0.7731217 | 0.716 | 0.496 | 2.91E-178 | 2.4 | HERC4    | 1.443548387 |
| DUSP52    | 1.67E-179 | 0.6604512 | 0.441 | 0.205 | 4.04E-175 | 2.4 | DUSP5    | 2.151219512 |
| SLC39A10  | 6.42E-178 | 0.8501405 | 0.345 | 0.145 | 1.55E-173 | 2.4 | SLC39A10 | 2.379310345 |
| ZNF6441   | 1.45E-177 | 0.7923768 | 0.667 | 0.438 | 3.49E-173 | 2.4 | ZNF644   | 1.52283105  |
| NCEH12    | 7.73E-177 | 0.7289132 | 0.635 | 0.377 | 1.86E-172 | 2.4 | NCEH1    | 1.684350133 |
| TMSB103   | 3.78E-175 | 0.8832206 | 0.855 | 0.712 | 9.12E-171 | 2.4 | TMSB10   | 1.200842697 |
| PGM2L12   | 6.36E-175 | 0.7112209 | 0.425 | 0.202 | 1.53E-170 | 2.4 | PGM2L1   | 2.103960396 |
| TBX33     | 8.19E-175 | 0.6474263 | 0.484 | 0.235 | 1.98E-170 | 2.4 | TBX3     | 2.059574468 |
| TBL1XR11  | 1.58E-174 | 0.7820608 | 0.759 | 0.552 | 3.80E-170 | 2.4 | TBL1XR1  | 1.375       |
| MYO63     | 8.55E-174 | 0.543759  | 0.897 | 0.737 | 2.06E-169 | 2.4 | MYO6     | 1.217096336 |
| MAN2A11   | 1.51E-169 | 0.6884817 | 0.521 | 0.287 | 3.65E-165 | 2.4 | MAN2A1   | 1.81533101  |
| TSPAN52   | 1.68E-167 | 0.6214909 | 0.53  | 0.272 | 4.05E-163 | 2.4 | TSPAN5   | 1.948529412 |
| LSAMP3    | 5.61E-167 | 0.6610596 | 0.683 | 0.436 | 1.35E-162 | 2.4 | LSAMP    | 1.566513761 |
| ANKRD30A3 | 7.07E-167 | 0.1942501 | 0.775 | 0.421 | 1.70E-162 | 2.4 | ANKRD30A | 1.840855107 |
| PTHLH3    | 2.70E-166 | 0.603881  | 0.44  | 0.202 | 6.51E-162 | 2.4 | PTHLH    | 2.178217822 |
| TNC3      | 8.32E-166 | 0.7458328 | 0.548 | 0.296 | 2.01E-161 | 2.4 | TNC      | 1.851351351 |
| TOM1L21   | 3.17E-164 | 0.7095166 | 0.495 | 0.269 | 7.64E-160 | 2.4 | TOM1L2   | 1.840148699 |
| H2AFZ1    | 9.15E-164 | 0.7374091 | 0.811 | 0.647 | 2.21E-159 | 2.4 | H2AFZ    | 1.253477589 |
| CLSTN23   | 6.44E-163 | 0.6287318 | 0.189 | 0.052 | 1.55E-158 | 2.4 | CLSTN2   | 3.634615385 |
| CDC42BPA1 | 3.80E-162 | 0.6936782 | 0.577 | 0.35  | 9.15E-158 | 2.4 | CDC42BPA | 1.648571429 |
| THSD41    | 4.41E-162 | 0.7545505 | 0.744 | 0.533 | 1.06E-157 | 2.4 | THSD4    | 1.39587242  |
| LAMA31    | 7.83E-161 | 0.6610726 | 0.373 | 0.164 | 1.89E-156 | 2.4 | LAMA3    | 2.274390244 |
| CXCL133   | 4.42E-157 | 0.5274571 | 0.643 | 0.374 | 1.07E-152 | 2.4 | CXCL13   | 1.719251337 |
| ARHGAP321 | 1.51E-155 | 0.7361569 | 0.607 | 0.384 | 3.64E-151 | 2.4 | ARHGAP32 | 1.580729167 |
| TMOD32    | 5.71E-155 | 0.6839924 | 0.592 | 0.372 | 1.38E-150 | 2.4 | TMOD3    | 1.591397849 |
| OPHN1     | 1.75E-154 | 0.9308632 | 0.511 | 0.299 | 4.23E-150 | 2.4 | OPHN1    | 1.7090301   |
| MYOF1     | 1.79E-153 | 0.6814126 | 0.758 | 0.573 | 4.33E-149 | 2.4 | MYOF     | 1.322862129 |
| SMURF11   | 4.27E-153 | 0.6974287 | 0.559 | 0.335 | 1.03E-148 | 2.4 | SMURF1   | 1.668656716 |
| ANKS1B1   | 8.84E-153 | 0.6576097 | 0.662 | 0.427 | 2.13E-148 | 2.4 | ANKS1B   | 1.550351288 |
| NTN4      | 2.56E-152 | 0.7123185 | 0.495 | 0.269 | 6.17E-148 | 2.4 | NTN4     | 1.840148699 |
| MAST21    | 9.71E-152 | 0.6762153 | 0.403 | 0.194 | 2.34E-147 | 2.4 | MAST2    | 2.077319588 |
| RALGPS22  | 8.35E-151 | 0.6843825 | 0.486 | 0.264 | 2.01E-146 | 2.4 | RALGPS2  | 1.840909091 |
| CD991     | 2.72E-150 | 0.5770509 | 0.287 | 0.112 | 6.55E-146 | 2.4 | CD99     | 2.5625      |
| MACF12    | 4.64E-148 | 0.6101751 | 0.844 | 0.701 | 1.12E-143 | 2.4 | MACF1    | 1.203994294 |
| MTSS11    | 2.75E-147 | 0.6915896 | 0.311 | 0.129 | 6.64E-143 | 2.4 | MTSS1    | 2.410852713 |
| NOVA1     | 6.52E-146 | 0.5474875 | 0.178 | 0.05  | 1.57E-141 | 2.4 | NOVA1    | 3.56        |
| LMO73     | 1.89E-145 | 0.7473264 | 0.349 | 0.159 | 4.57E-141 | 2.4 | LMO7     | 2.194968553 |
| SYTL41    | 2.34E-142 | 0.5873845 | 0.266 | 0.103 | 5.65E-138 | 2.4 | SYTL4    | 2.582524272 |
| GLUD12    | 7.29E-141 | 0.6321078 | 0.459 | 0.247 | 1.76E-136 | 2.4 | GLUD1    | 1.858299595 |
| TMC5      | 1.54E-140 | 0.7096018 | 0.394 | 0.192 | 3.72E-136 | 2.4 | TMC5     | 2.052083333 |
| CACNB42   | 2.51E-140 | 0.696535  | 0.257 | 0.097 | 6.04E-136 | 2.4 | CACNB4   | 2.649484536 |
| TRERF1    | 5.84E-140 | 0.6532564 | 0.316 | 0.136 | 1.41E-135 | 2.4 | TRERF1   | 2.323529412 |
| ECT23     | 3.96E-139 | 0.5783851 | 0.375 | 0.178 | 9.54E-135 | 2.4 | ECT2     | 2.106741573 |
| COL4A53   | 4.48E-139 | 0.5930461 | 0.396 | 0.191 | 1.08E-134 | 2.4 | COL4A5   | 2.073298429 |

|           |           |           |       |       |           |     |          |             |
|-----------|-----------|-----------|-------|-------|-----------|-----|----------|-------------|
| CUX1      | 2.00E-138 | 0.6671876 | 0.528 | 0.32  | 4.82E-134 | 2.4 | CUX1     | 1.65        |
| SERHL21   | 5.56E-138 | 0.6376923 | 0.285 | 0.115 | 1.34E-133 | 2.4 | SERHL2   | 2.47826087  |
| PERP2     | 5.20E-137 | 0.6399353 | 0.626 | 0.426 | 1.25E-132 | 2.4 | PERP     | 1.469483568 |
| BZW11     | 1.62E-134 | 0.6588463 | 0.45  | 0.249 | 3.90E-130 | 2.4 | BZW1     | 1.807228916 |
| GPRC5A1   | 1.91E-134 | 0.6982164 | 0.572 | 0.361 | 4.61E-130 | 2.4 | GPRC5A   | 1.584487535 |
| MAP3K16   | 1.17E-133 | 0.6466955 | 0.648 | 0.427 | 2.83E-129 | 2.4 | MAP3K1   | 1.517564403 |
| TSC22D31  | 2.16E-132 | 0.7471349 | 0.346 | 0.162 | 5.20E-128 | 2.4 | TSC22D3  | 2.135802469 |
| UGCG1     | 4.37E-132 | 0.6310074 | 0.664 | 0.461 | 1.05E-127 | 2.4 | UGCG     | 1.440347072 |
| EPB41L4A  | 1.73E-128 | 0.6061622 | 0.306 | 0.137 | 4.17E-124 | 2.4 | EPB41L4A | 2.233576642 |
| ACTB3     | 5.05E-128 | 0.9150039 | 0.75  | 0.626 | 1.22E-123 | 2.4 | ACTB     | 1.198083067 |
| ANXA51    | 6.35E-128 | 0.6102821 | 0.544 | 0.336 | 1.53E-123 | 2.4 | ANXA5    | 1.619047619 |
| DHX32     | 1.47E-127 | 0.5966784 | 0.466 | 0.27  | 3.55E-123 | 2.4 | DHX32    | 1.725925926 |
| SDR16C5   | 2.76E-127 | 0.479721  | 0.205 | 0.07  | 6.65E-123 | 2.4 | SDR16C5  | 2.928571429 |
| TM4SF14   | 2.23E-125 | 0.6715032 | 0.935 | 0.902 | 5.38E-121 | 2.4 | TM4SF1   | 1.036585366 |
| STAT5B1   | 3.97E-124 | 0.5802355 | 0.507 | 0.304 | 9.58E-120 | 2.4 | STAT5B   | 1.667763158 |
| ARHGAP421 | 2.67E-121 | 0.4840515 | 0.175 | 0.056 | 6.45E-117 | 2.4 | ARHGAP42 | 3.125       |
| HPX3      | 4.39E-121 | 0.604011  | 0.383 | 0.188 | 1.06E-116 | 2.4 | HPX      | 2.037234043 |
| ASPH2     | 3.05E-120 | 0.573279  | 0.455 | 0.257 | 7.35E-116 | 2.4 | ASPH     | 1.770428016 |
| FBXL21    | 1.27E-119 | 0.6075368 | 0.287 | 0.128 | 3.05E-115 | 2.4 | FBXL2    | 2.2421875   |
| AFF33     | 2.04E-118 | 0.3787259 | 0.537 | 0.307 | 4.91E-114 | 2.4 | AFF3     | 1.749185668 |
| TTY14     | 4.43E-117 | 0.8252419 | 0.576 | 0.397 | 1.07E-112 | 2.4 | TTY14    | 1.450881612 |
| DSTN1     | 6.15E-117 | 0.6957808 | 0.714 | 0.563 | 1.48E-112 | 2.4 | DSTN     | 1.268206039 |
| TOX32     | 1.71E-116 | 0.5268822 | 0.318 | 0.147 | 4.13E-112 | 2.4 | TOX3     | 2.163265306 |
| EREG3     | 2.80E-116 | 0.5689346 | 0.439 | 0.232 | 6.75E-112 | 2.4 | EREG     | 1.892241379 |
| JUP1      | 5.17E-116 | 0.630102  | 0.42  | 0.24  | 1.25E-111 | 2.4 | JUP      | 1.75        |
| COX6C3    | 1.22E-115 | 0.4160239 | 0.859 | 0.747 | 2.94E-111 | 2.4 | COX6C    | 1.149933066 |
| B3GLCT    | 4.18E-115 | 0.4394558 | 0.168 | 0.054 | 1.01E-110 | 2.4 | B3GLCT   | 3.111111111 |
| LYPD6B    | 2.49E-114 | 0.5447967 | 0.237 | 0.095 | 6.01E-110 | 2.4 | LYPD6B   | 2.494736842 |
| CASC152   | 2.17E-113 | 0.4600797 | 0.7   | 0.493 | 5.23E-109 | 2.4 | CASC15   | 1.419878296 |
| MIPOL12   | 1.05E-112 | 0.5738525 | 0.33  | 0.16  | 2.54E-108 | 2.4 | MIPOL1   | 2.0625      |
| ANKRD502  | 4.58E-112 | 0.4296789 | 0.187 | 0.065 | 1.10E-107 | 2.4 | ANKRD50  | 2.876923077 |
| S100A102  | 2.03E-111 | 0.686687  | 0.549 | 0.36  | 4.88E-107 | 2.4 | S100A10  | 1.525       |
| OPN32     | 3.53E-111 | 0.4303106 | 0.206 | 0.077 | 8.52E-107 | 2.4 | OPN3     | 2.675324675 |
| ATP2B42   | 5.51E-110 | 0.5766816 | 0.533 | 0.329 | 1.33E-105 | 2.4 | ATP2B4   | 1.62006079  |
| ITGA52    | 2.12E-109 | 0.4996826 | 0.213 | 0.082 | 5.11E-105 | 2.4 | ITGA5    | 2.597560976 |
| KCNMA13   | 5.31E-109 | 0.7193211 | 0.28  | 0.127 | 1.28E-104 | 2.4 | KCNMA1   | 2.204724409 |
| MSI22     | 1.67E-107 | 0.6009302 | 0.503 | 0.318 | 4.03E-103 | 2.4 | MSI2     | 1.581761006 |
| CD633     | 2.78E-107 | 0.5842203 | 0.545 | 0.356 | 6.71E-103 | 2.4 | CD63     | 1.530898876 |
| PGRMC21   | 3.01E-107 | 0.4835958 | 0.251 | 0.109 | 7.27E-103 | 2.4 | PGRMC2   | 2.302752294 |
| STMN1     | 8.22E-107 | 0.6369577 | 0.395 | 0.223 | 1.98E-102 | 2.4 | STMN1    | 1.771300448 |
| TANC11    | 1.24E-106 | 0.6467016 | 0.502 | 0.324 | 3.00E-102 | 2.4 | TANC1    | 1.549382716 |
| ZFAND32   | 6.19E-106 | 0.3803638 | 0.888 | 0.739 | 1.49E-101 | 2.4 | ZFAND3   | 1.201623816 |
| BCL2L1    | 1.29E-105 | 0.549427  | 0.294 | 0.14  | 3.10E-101 | 2.4 | BCL2L1   | 2.1         |
| EXOC6B1   | 1.44E-105 | 0.5911088 | 0.423 | 0.248 | 3.48E-101 | 2.4 | EXOC6B   | 1.705645161 |
| ADAM101   | 2.40E-105 | 0.5272254 | 0.537 | 0.348 | 5.78E-101 | 2.4 | ADAM10   | 1.543103448 |
| SLK1      | 2.47E-105 | 0.5378808 | 0.385 | 0.211 | 5.96E-101 | 2.4 | SLK      | 1.82464455  |
| ZNRF11    | 3.72E-105 | 0.5409111 | 0.3   | 0.146 | 8.97E-101 | 2.4 | ZNRF1    | 2.054794521 |
| DUSP42    | 2.32E-104 | 0.5055805 | 0.259 | 0.115 | 5.60E-100 | 2.4 | DUSP4    | 2.252173913 |
| PSD32     | 3.84E-104 | 0.6053244 | 0.506 | 0.321 | 9.25E-100 | 2.4 | PSD3     | 1.576323988 |
| LRRFIP14  | 5.48E-104 | 0.4857056 | 0.761 | 0.609 | 1.32E-99  | 2.4 | LRRFIP1  | 1.249589491 |
| CNN33     | 1.77E-103 | 0.5300883 | 0.658 | 0.492 | 4.26E-99  | 2.4 | CNN3     | 1.337398374 |
| INADL1    | 1.45E-102 | 0.4268169 | 0.912 | 0.805 | 3.50E-98  | 2.4 | INADL    | 1.132919255 |

|              |           |           |       |       |          |     |            |             |
|--------------|-----------|-----------|-------|-------|----------|-----|------------|-------------|
| PHLDB22      | 1.67E-102 | 0.5783519 | 0.587 | 0.392 | 4.02E-98 | 2.4 | PHLDB2     | 1.49744898  |
| AKAP132      | 1.88E-102 | 0.4988561 | 0.75  | 0.589 | 4.53E-98 | 2.4 | AKAP13     | 1.273344652 |
| SHROOM32     | 2.49E-102 | 0.5303771 | 0.762 | 0.61  | 6.00E-98 | 2.4 | SHROOM3    | 1.249180328 |
| PKM1         | 2.16E-100 | 0.5835033 | 0.505 | 0.328 | 5.22E-96 | 2.4 | PKM        | 1.539634146 |
| FOXA13       | 2.32E-100 | 0.4118232 | 0.236 | 0.099 | 5.59E-96 | 2.4 | FOXA1      | 2.383838384 |
| ACTG12       | 3.93E-100 | 0.7101516 | 0.813 | 0.71  | 9.48E-96 | 2.4 | ACTG1      | 1.145070423 |
| CYB5A2       | 3.76E-99  | 0.5937837 | 0.411 | 0.234 | 9.06E-95 | 2.4 | CYB5A      | 1.756410256 |
| RTN44        | 9.15E-99  | 0.4589579 | 0.777 | 0.633 | 2.21E-94 | 2.4 | RTN4       | 1.227488152 |
| TMBIM63      | 9.81E-99  | 0.4318975 | 0.919 | 0.851 | 2.37E-94 | 2.4 | TMBIM6     | 1.079905993 |
| AZGP13       | 1.11E-98  | 0.5639337 | 0.702 | 0.523 | 2.68E-94 | 2.4 | AZGP1      | 1.342256214 |
| FAM46A2      | 2.46E-98  | 0.570134  | 0.301 | 0.149 | 5.93E-94 | 2.4 | FAM46A     | 2.020134228 |
| LCOR1        | 1.81E-97  | 0.5337089 | 0.415 | 0.242 | 4.36E-93 | 2.4 | LCOR       | 1.714876033 |
| NDUFV22      | 1.95E-97  | 0.5124395 | 0.421 | 0.247 | 4.71E-93 | 2.4 | NDUFV2     | 1.704453441 |
| CDH19        | 3.70E-97  | 0.4976122 | 0.738 | 0.584 | 8.92E-93 | 2.4 | CDH1       | 1.26369863  |
| MAGI33       | 4.05E-97  | 0.4277351 | 0.555 | 0.355 | 9.77E-93 | 2.4 | MAGI3      | 1.563380282 |
| UGDH3        | 5.77E-97  | 0.4371304 | 0.391 | 0.211 | 1.39E-92 | 2.4 | UGDH       | 1.853080569 |
| FAM107B2     | 1.16E-96  | 0.5803484 | 0.426 | 0.255 | 2.80E-92 | 2.4 | FAM107B    | 1.670588235 |
| KAT6B2       | 1.53E-96  | 0.5108635 | 0.405 | 0.233 | 3.70E-92 | 2.4 | KAT6B      | 1.738197425 |
| BTRC3        | 2.10E-96  | 0.4942517 | 0.414 | 0.239 | 5.07E-92 | 2.4 | BTRC       | 1.732217573 |
| PLAU         | 2.58E-96  | 0.4975631 | 0.191 | 0.074 | 6.23E-92 | 2.4 | PLAU       | 2.581081081 |
| HSPB82       | 3.93E-96  | 0.3859446 | 0.17  | 0.06  | 9.48E-92 | 2.4 | HSPB8      | 2.833333333 |
| DST3         | 4.90E-96  | 0.5702801 | 0.688 | 0.548 | 1.18E-91 | 2.4 | DST        | 1.255474453 |
| TJP12        | 7.36E-96  | 0.5157714 | 0.657 | 0.483 | 1.78E-91 | 2.4 | TJP1       | 1.360248447 |
| PPP3CA3      | 1.05E-95  | 0.4773976 | 0.71  | 0.54  | 2.53E-91 | 2.4 | PPP3CA     | 1.314814815 |
| CCDC732      | 2.11E-95  | 0.5438049 | 0.215 | 0.089 | 5.09E-91 | 2.4 | CCDC73     | 2.415730337 |
| NPEPPS2      | 8.02E-95  | 0.4356577 | 0.646 | 0.471 | 1.93E-90 | 2.4 | NPEPPS     | 1.371549894 |
| RNF1151      | 2.85E-94  | 0.5304155 | 0.407 | 0.242 | 6.88E-90 | 2.4 | RNF115     | 1.681818182 |
| TTC62        | 7.68E-94  | 0.456667  | 0.308 | 0.153 | 1.85E-89 | 2.4 | TTC6       | 2.013071895 |
| ATXN12       | 1.09E-93  | 0.4349483 | 0.671 | 0.49  | 2.63E-89 | 2.4 | ATXN1      | 1.369387755 |
| IER32        | 6.31E-93  | 0.609525  | 0.471 | 0.295 | 1.52E-88 | 2.4 | IER3       | 1.596610169 |
| FGD41        | 2.15E-92  | 0.6206386 | 0.407 | 0.248 | 5.18E-88 | 2.4 | FGD4       | 1.641129032 |
| TCF121       | 2.23E-91  | 0.4829314 | 0.732 | 0.571 | 5.37E-87 | 2.4 | TCF12      | 1.281961471 |
| CBLB1        | 5.81E-91  | 0.5572266 | 0.468 | 0.298 | 1.40E-86 | 2.4 | CBLB       | 1.570469799 |
| PTPRM1       | 2.10E-90  | 0.6044638 | 0.38  | 0.219 | 5.07E-86 | 2.4 | PTPRM      | 1.735159817 |
| LNx22        | 2.73E-89  | 0.4585969 | 0.265 | 0.128 | 6.58E-85 | 2.4 | LNx2       | 2.0703125   |
| VEGFC        | 5.93E-89  | 0.3774169 | 0.137 | 0.045 | 1.43E-84 | 2.4 | VEGFC      | 3.044444444 |
| SH3BP42      | 2.01E-88  | 0.4713533 | 0.281 | 0.139 | 4.84E-84 | 2.4 | SH3BP4     | 2.021582734 |
| VAMP81       | 3.24E-88  | 0.4864372 | 0.833 | 0.748 | 7.81E-84 | 2.4 | VAMP8      | 1.113636364 |
| MTURN1       | 3.52E-88  | 0.4493314 | 0.283 | 0.143 | 8.50E-84 | 2.4 | MTURN      | 1.979020979 |
| RBMS11       | 6.23E-88  | 0.5205899 | 0.489 | 0.321 | 1.50E-83 | 2.4 | RBMS1      | 1.523364486 |
| ZNF675       | 8.16E-88  | 0.438693  | 0.207 | 0.088 | 1.97E-83 | 2.4 | ZNF675     | 2.352272727 |
| PAWR2        | 1.47E-87  | 0.5737418 | 0.67  | 0.53  | 3.56E-83 | 2.4 | PAWR       | 1.264150943 |
| F2RL12       | 1.82E-87  | 0.3163901 | 0.13  | 0.042 | 4.38E-83 | 2.4 | F2RL1      | 3.095238095 |
| NAALADL22    | 1.85E-87  | 0.5723281 | 0.643 | 0.48  | 4.45E-83 | 2.4 | NAALADL2   | 1.339583333 |
| TNFRSF12A1   | 2.17E-87  | 0.3520335 | 0.157 | 0.057 | 5.23E-83 | 2.4 | TNFRSF12A  | 2.754385965 |
| ARID1B2      | 2.62E-87  | 0.5124993 | 0.631 | 0.473 | 6.32E-83 | 2.4 | ARID1B     | 1.334038055 |
| HS6ST22      | 3.20E-87  | 0.5345532 | 0.266 | 0.128 | 7.71E-83 | 2.4 | HS6ST2     | 2.078125    |
| TRAFD11      | 1.67E-86  | 0.5442238 | 0.308 | 0.164 | 4.02E-82 | 2.4 | TRAFD1     | 1.87804878  |
| RRAS22       | 6.26E-86  | 0.5170914 | 0.37  | 0.218 | 1.51E-81 | 2.4 | RRAS2      | 1.697247706 |
| GS1-114I9.31 | 8.70E-85  | 0.5263128 | 0.33  | 0.183 | 2.10E-80 | 2.4 | GS1-114I9. | 1.803278689 |
| ARPP192      | 9.87E-85  | 0.4891279 | 0.574 | 0.407 | 2.38E-80 | 2.4 | ARPP19     | 1.41031941  |
| TRIO4        | 1.75E-84  | 0.3300726 | 0.904 | 0.794 | 4.22E-80 | 2.4 | TRIO       | 1.138539043 |



|          |          |           |       |       |          |     |         |             |
|----------|----------|-----------|-------|-------|----------|-----|---------|-------------|
| ITSN11   | 7.55E-84 | 0.4828752 | 0.323 | 0.176 | 1.82E-79 | 2.4 | ITSN1   | 1.835227273 |
| PLPP1    | 8.38E-84 | 0.4787804 | 0.224 | 0.103 | 2.02E-79 | 2.4 | PLPP1   | 2.174757282 |
| DUSP103  | 1.87E-83 | 0.4466923 | 0.361 | 0.202 | 4.50E-79 | 2.4 | DUSP10  | 1.787128713 |
| PRKG11   | 1.96E-83 | 0.5617139 | 0.265 | 0.13  | 4.74E-79 | 2.4 | PRKG1   | 2.038461538 |
| TBC1D92  | 3.32E-83 | 0.4254155 | 0.607 | 0.423 | 8.00E-79 | 2.4 | TBC1D9  | 1.43498818  |
| TGFBR12  | 5.08E-83 | 0.5354343 | 0.217 | 0.098 | 1.22E-78 | 2.4 | TGFBR1  | 2.214285714 |
| DOPEY2   | 2.29E-82 | 0.3919833 | 0.178 | 0.072 | 5.52E-78 | 2.4 | DOPEY2  | 2.472222222 |
| TBL1X    | 4.82E-82 | 0.5141977 | 0.342 | 0.197 | 1.16E-77 | 2.4 | TBL1X   | 1.736040609 |
| BTBD9    | 9.38E-82 | 0.5797404 | 0.391 | 0.239 | 2.26E-77 | 2.4 | BTBD9   | 1.635983264 |
| RICTOR2  | 1.69E-81 | 0.4172889 | 0.75  | 0.602 | 4.07E-77 | 2.4 | RICTOR  | 1.245847176 |
| S100A4   | 2.40E-81 | 0.5448245 | 0.263 | 0.133 | 5.79E-77 | 2.4 | S100A4  | 1.977443609 |
| TFAP2A   | 5.55E-81 | 0.4413688 | 0.269 | 0.137 | 1.34E-76 | 2.4 | TFAP2A  | 1.96350365  |
| ESYT2    | 6.16E-81 | 0.4619682 | 0.645 | 0.491 | 1.48E-76 | 2.4 | ESYT2   | 1.313645621 |
| ADAM322  | 6.41E-81 | 0.4686652 | 0.364 | 0.209 | 1.55E-76 | 2.4 | ADAM32  | 1.741626794 |
| PTK21    | 8.16E-81 | 0.4049161 | 0.763 | 0.622 | 1.97E-76 | 2.4 | PTK2    | 1.226688103 |
| DIAPH11  | 4.21E-80 | 0.4712236 | 0.434 | 0.276 | 1.02E-75 | 2.4 | DIAPH1  | 1.572463768 |
| FAT11    | 4.48E-80 | 0.5344019 | 0.324 | 0.183 | 1.08E-75 | 2.4 | FAT1    | 1.770491803 |
| GJB31    | 4.94E-80 | 0.2648815 | 0.091 | 0.024 | 1.19E-75 | 2.4 | GJB3    | 3.791666667 |
| S100A143 | 4.97E-80 | 0.5387528 | 0.818 | 0.721 | 1.20E-75 | 2.4 | S100A14 | 1.134535368 |
| GSK3B2   | 1.21E-79 | 0.4689839 | 0.537 | 0.377 | 2.93E-75 | 2.4 | GSK3B   | 1.424403183 |
| APP1     | 1.33E-79 | 0.3546608 | 0.872 | 0.759 | 3.20E-75 | 2.4 | APP     | 1.148880105 |
| SORT11   | 4.19E-79 | 0.4110093 | 0.256 | 0.127 | 1.01E-74 | 2.4 | SORT1   | 2.015748031 |
| UBE2E2   | 3.12E-78 | 0.4800305 | 0.583 | 0.429 | 7.52E-74 | 2.4 | UBE2E2  | 1.358974359 |
| MBNL22   | 6.06E-78 | 0.5156607 | 0.666 | 0.523 | 1.46E-73 | 2.4 | MBNL2   | 1.273422562 |
| APLP23   | 1.48E-77 | 0.454419  | 0.413 | 0.256 | 3.58E-73 | 2.4 | APLP2   | 1.61328125  |
| FHL22    | 1.87E-77 | 0.4687512 | 0.289 | 0.153 | 4.52E-73 | 2.4 | FHL2    | 1.888888889 |
| BRWD11   | 5.16E-77 | 0.4546104 | 0.508 | 0.353 | 1.25E-72 | 2.4 | BRWD1   | 1.439093484 |
| ZNF91    | 5.64E-77 | 0.4784251 | 0.334 | 0.194 | 1.36E-72 | 2.4 | ZNF91   | 1.721649485 |
| GAN1     | 8.78E-77 | 0.4885819 | 0.309 | 0.174 | 2.12E-72 | 2.4 | GAN     | 1.775862069 |
| AKAP122  | 1.16E-76 | 0.6935672 | 0.112 | 0.035 | 2.80E-72 | 2.4 | AKAP12  | 3.2         |
| PPP2R2A4 | 1.46E-76 | 0.4087292 | 0.666 | 0.509 | 3.52E-72 | 2.4 | PPP2R2A | 1.308447937 |
| CACNG41  | 1.63E-76 | 0.3180558 | 0.135 | 0.048 | 3.92E-72 | 2.4 | CACNG4  | 2.8125      |
| SLC7A23  | 2.65E-76 | 0.3900232 | 0.453 | 0.276 | 6.39E-72 | 2.4 | SLC7A2  | 1.641304348 |
| MYO5B3   | 3.03E-76 | 0.4596402 | 0.726 | 0.583 | 7.31E-72 | 2.4 | MYO5B   | 1.245283019 |
| STC1     | 3.51E-76 | 0.7073073 | 0.115 | 0.037 | 8.47E-72 | 2.4 | STC1    | 3.108108108 |
| AFF11    | 7.70E-76 | 0.5048265 | 0.509 | 0.353 | 1.86E-71 | 2.4 | AFF1    | 1.441926346 |
| SYBU     | 9.20E-76 | 0.4207275 | 0.168 | 0.069 | 2.22E-71 | 2.4 | SYBU    | 2.434782609 |
| ANGPTL11 | 1.67E-75 | 0.4239347 | 0.254 | 0.127 | 4.03E-71 | 2.4 | ANGPTL1 | 2           |
| SMYD3    | 4.47E-75 | 0.4762171 | 0.478 | 0.318 | 1.08E-70 | 2.4 | SMYD3   | 1.503144654 |
| PTPN133  | 6.01E-75 | 0.4081361 | 0.301 | 0.16  | 1.45E-70 | 2.4 | PTPN13  | 1.88125     |
| SFN1     | 1.99E-74 | 0.5833072 | 0.081 | 0.021 | 4.80E-70 | 2.4 | SFN     | 3.857142857 |
| GSPT13   | 2.95E-74 | 0.4502227 | 0.504 | 0.347 | 7.11E-70 | 2.4 | GSPT1   | 1.452449568 |
| FTX2     | 3.10E-74 | 0.4186766 | 0.693 | 0.535 | 7.47E-70 | 2.4 | FTX     | 1.295327103 |
| CD441    | 3.18E-74 | 0.3971907 | 0.724 | 0.568 | 7.66E-70 | 2.4 | CD44    | 1.274647887 |
| HLA-C    | 1.18E-73 | 0.4661306 | 0.443 | 0.292 | 2.86E-69 | 2.4 | HLA-C   | 1.517123288 |
| TIMP2    | 1.20E-73 | 0.3251547 | 0.141 | 0.053 | 2.91E-69 | 2.4 | TIMP2   | 2.660377358 |
| ZSWIM63  | 1.59E-73 | 0.3940226 | 0.636 | 0.476 | 3.83E-69 | 2.4 | ZSWIM6  | 1.336134454 |
| PARD3B   | 2.63E-73 | 0.5553163 | 0.316 | 0.184 | 6.34E-69 | 2.4 | PARD3B  | 1.717391304 |
| SDK11    | 5.17E-73 | 0.4900731 | 0.257 | 0.133 | 1.25E-68 | 2.4 | SDK1    | 1.932330827 |
| P4HA11   | 9.83E-73 | 0.4696269 | 0.523 | 0.363 | 2.37E-68 | 2.4 | P4HA1   | 1.44077135  |
| UMAD11   | 1.48E-72 | 0.4609541 | 0.327 | 0.188 | 3.57E-68 | 2.4 | UMAD1   | 1.739361702 |
| SPINT1   | 2.15E-72 | 0.430428  | 0.297 | 0.166 | 5.20E-68 | 2.4 | SPINT1  | 1.789156627 |

|               |          |           |       |       |          |     |           |             |
|---------------|----------|-----------|-------|-------|----------|-----|-----------|-------------|
| TFF13         | 2.52E-72 | 0.6269086 | 0.2   | 0.091 | 6.08E-68 | 2.4 | TFF1      | 2.197802198 |
| TMEM65        | 1.43E-71 | 0.4886628 | 0.322 | 0.189 | 3.46E-67 | 2.4 | TMEM65    | 1.703703704 |
| ADGRL33       | 4.50E-71 | 0.4294361 | 0.202 | 0.093 | 1.08E-66 | 2.4 | ADGRL3    | 2.172043011 |
| ABHD181       | 6.36E-71 | 0.4236559 | 0.482 | 0.323 | 1.53E-66 | 2.4 | ABHD18    | 1.492260062 |
| PACS12        | 8.67E-71 | 0.5438114 | 0.459 | 0.316 | 2.09E-66 | 2.4 | PACS1     | 1.452531646 |
| WWP11         | 3.09E-70 | 0.4503409 | 0.439 | 0.291 | 7.45E-66 | 2.4 | WWP1      | 1.508591065 |
| USP252        | 7.64E-70 | 0.4249323 | 0.385 | 0.24  | 1.84E-65 | 2.4 | USP25     | 1.604166667 |
| PRKAA21       | 7.64E-70 | 0.4143146 | 0.228 | 0.113 | 1.84E-65 | 2.4 | PRKAA2    | 2.017699115 |
| MTCL12        | 1.35E-69 | 0.2881644 | 0.123 | 0.044 | 3.27E-65 | 2.4 | MTCL1     | 2.795454545 |
| AGO4          | 2.04E-69 | 0.450436  | 0.285 | 0.159 | 4.93E-65 | 2.4 | AGO4      | 1.79245283  |
| RUNX11        | 6.38E-69 | 0.3437986 | 0.76  | 0.625 | 1.54E-64 | 2.4 | RUNX1     | 1.216       |
| GDF15         | 1.40E-68 | 0.3837746 | 0.088 | 0.026 | 3.39E-64 | 2.4 | GDF15     | 3.384615385 |
| PARM11        | 4.21E-68 | 0.3420407 | 0.146 | 0.058 | 1.02E-63 | 2.4 | PARM1     | 2.517241379 |
| TNS4          | 4.29E-68 | 0.3026725 | 0.1   | 0.031 | 1.03E-63 | 2.4 | TNS4      | 3.225806452 |
| KLHL2         | 4.82E-68 | 0.4036681 | 0.239 | 0.122 | 1.16E-63 | 2.4 | KLHL2     | 1.959016393 |
| OTUD7B3       | 5.90E-68 | 0.4157027 | 0.424 | 0.274 | 1.42E-63 | 2.4 | OTUD7B    | 1.547445255 |
| KIAA15221     | 8.38E-68 | 0.4446235 | 0.345 | 0.211 | 2.02E-63 | 2.4 | KIAA1522  | 1.63507109  |
| DOCK9         | 8.60E-68 | 0.4651528 | 0.334 | 0.202 | 2.07E-63 | 2.4 | DOCK9     | 1.653465347 |
| MYO1D2        | 9.15E-68 | 0.4461228 | 0.442 | 0.298 | 2.21E-63 | 2.4 | MYO1D     | 1.483221477 |
| GDE12         | 1.12E-67 | 0.3773563 | 0.246 | 0.129 | 2.71E-63 | 2.4 | GDE1      | 1.906976744 |
| AAK11         | 1.14E-67 | 0.3990206 | 0.275 | 0.15  | 2.75E-63 | 2.4 | AAK1      | 1.833333333 |
| RAPH13        | 1.57E-67 | 0.4590707 | 0.468 | 0.316 | 3.78E-63 | 2.4 | RAPH1     | 1.481012658 |
| SAMD4A2       | 2.57E-67 | 0.4207269 | 0.74  | 0.604 | 6.20E-63 | 2.4 | SAMD4A    | 1.225165563 |
| MIR4435-2HG2  | 1.94E-66 | 0.5391843 | 0.617 | 0.485 | 4.68E-62 | 2.4 | MIR4435-2 | 1.272164948 |
| TMEM106B      | 3.23E-66 | 0.4151792 | 0.253 | 0.136 | 7.79E-62 | 2.4 | TMEM106B  | 1.860294118 |
| ZNF217        | 4.86E-66 | 0.4813829 | 0.289 | 0.168 | 1.17E-61 | 2.4 | ZNF217    | 1.720238095 |
| SSBP22        | 5.18E-66 | 0.4930346 | 0.558 | 0.417 | 1.25E-61 | 2.4 | SSBP2     | 1.338129496 |
| ABLIM31       | 5.74E-66 | 0.3123119 | 0.121 | 0.044 | 1.38E-61 | 2.4 | ABLIM3    | 2.75        |
| LASP11        | 7.71E-66 | 0.3755628 | 0.234 | 0.121 | 1.86E-61 | 2.4 | LASP1     | 1.933884298 |
| PDS5B         | 7.26E-65 | 0.4908688 | 0.463 | 0.326 | 1.75E-60 | 2.4 | PDS5B     | 1.420245399 |
| SLC44A42      | 1.10E-64 | 0.3543209 | 0.21  | 0.103 | 2.65E-60 | 2.4 | SLC44A4   | 2.038834951 |
| LYST1         | 7.61E-64 | 0.4342227 | 0.395 | 0.254 | 1.83E-59 | 2.4 | LYST      | 1.55511811  |
| RANBP92       | 9.28E-64 | 0.423301  | 0.422 | 0.279 | 2.24E-59 | 2.4 | RANBP9    | 1.512544803 |
| C1QTNF3-AMACR | 1.52E-63 | 0.4829946 | 0.438 | 0.3   | 3.68E-59 | 2.4 | C1QTNF3-A | 1.46        |
| HSPB13        | 2.00E-63 | 0.4488903 | 0.131 | 0.051 | 4.82E-59 | 2.4 | HSPB1     | 2.568627451 |
| SH3D191       | 2.40E-63 | 0.4481807 | 0.478 | 0.339 | 5.79E-59 | 2.4 | SH3D19    | 1.410029499 |
| ASAP11        | 2.66E-63 | 0.4370775 | 0.415 | 0.273 | 6.41E-59 | 2.4 | ASAP1     | 1.52014652  |
| CAB39L        | 2.71E-63 | 0.4581683 | 0.266 | 0.149 | 6.53E-59 | 2.4 | CAB39L    | 1.785234899 |
| PLOD22        | 3.05E-63 | 0.490406  | 0.356 | 0.221 | 7.36E-59 | 2.4 | PLOD2     | 1.610859729 |
| USP341        | 3.07E-63 | 0.3748436 | 0.759 | 0.634 | 7.41E-59 | 2.4 | USP34     | 1.197160883 |
| OGT2          | 3.44E-63 | 0.4132378 | 0.527 | 0.383 | 8.31E-59 | 2.4 | OGT       | 1.375979112 |
| COL12A12      | 5.42E-63 | 0.3806134 | 0.112 | 0.04  | 1.31E-58 | 2.4 | COL12A1   | 2.8         |
| RNF152        | 9.37E-63 | 0.3524782 | 0.175 | 0.08  | 2.26E-58 | 2.4 | RNF152    | 2.1875      |
| ENOX12        | 1.10E-62 | 0.4115281 | 0.238 | 0.124 | 2.66E-58 | 2.4 | ENOX1     | 1.919354839 |
| KLHL241       | 1.29E-62 | 0.4225111 | 0.471 | 0.332 | 3.11E-58 | 2.4 | KLHL24    | 1.418674699 |
| NBEA          | 1.29E-62 | 0.409666  | 0.373 | 0.232 | 3.11E-58 | 2.4 | NBEA      | 1.607758621 |
| ARHGAP292     | 1.35E-62 | 0.2916118 | 0.705 | 0.552 | 3.24E-58 | 2.4 | ARHGAP29  | 1.277173913 |
| KLF123        | 1.75E-62 | 0.4608698 | 0.246 | 0.132 | 4.23E-58 | 2.4 | KLF12     | 1.863636364 |
| GLI33         | 2.58E-62 | 0.3793924 | 0.233 | 0.121 | 6.22E-58 | 2.4 | GLI3      | 1.925619835 |
| NF11          | 2.71E-62 | 0.4193028 | 0.622 | 0.485 | 6.54E-58 | 2.4 | NF1       | 1.282474227 |
| JUND3         | 2.74E-62 | 0.3904854 | 0.281 | 0.157 | 6.61E-58 | 2.4 | JUND      | 1.789808917 |
| KPNA71        | 3.42E-62 | 0.2112501 | 0.064 | 0.015 | 8.25E-58 | 2.4 | KPNA7     | 4.266666667 |

|            |          |           |       |       |          |     |           |             |
|------------|----------|-----------|-------|-------|----------|-----|-----------|-------------|
| FGD61      | 4.55E-62 | 0.4601248 | 0.463 | 0.325 | 1.10E-57 | 2.4 | FGD6      | 1.424615385 |
| MAP42      | 4.81E-62 | 0.4325107 | 0.593 | 0.463 | 1.16E-57 | 2.4 | MAP4      | 1.280777538 |
| PKHD1      | 7.99E-62 | 0.3055677 | 0.108 | 0.038 | 1.93E-57 | 2.4 | PKHD1     | 2.842105263 |
| KLHL5      | 8.99E-62 | 0.4133756 | 0.402 | 0.267 | 2.17E-57 | 2.4 | KLHL5     | 1.505617978 |
| LINC007043 | 2.48E-61 | 0.2425433 | 0.076 | 0.021 | 5.97E-57 | 2.4 | LINC00704 | 3.619047619 |
| DUSP163    | 6.00E-61 | 0.4119505 | 0.546 | 0.401 | 1.45E-56 | 2.4 | DUSP16    | 1.36159601  |
| TP53INP1   | 6.01E-61 | 0.3271501 | 0.157 | 0.069 | 1.45E-56 | 2.4 | TP53INP1  | 2.275362319 |
| GLO12      | 1.56E-60 | 0.3846063 | 0.273 | 0.156 | 3.77E-56 | 2.4 | GLO1      | 1.75        |
| ABHD2      | 1.65E-60 | 0.3939075 | 0.243 | 0.131 | 3.99E-56 | 2.4 | ABHD2     | 1.854961832 |
| KLRD12     | 1.85E-60 | 0.4232948 | 0.264 | 0.147 | 4.47E-56 | 2.4 | KLRD1     | 1.795918367 |
| ALOX15B2   | 2.90E-60 | 0.2969624 | 0.12  | 0.045 | 7.00E-56 | 2.4 | ALOX15B   | 2.666666667 |
| PTP4A11    | 4.85E-60 | 0.4970024 | 0.399 | 0.266 | 1.17E-55 | 2.4 | PTP4A1    | 1.5         |
| ARID3B     | 7.92E-60 | 0.2681705 | 0.086 | 0.027 | 1.91E-55 | 2.4 | ARID3B    | 3.185185185 |
| CD241      | 1.52E-59 | 0.4905998 | 0.682 | 0.564 | 3.66E-55 | 2.4 | CD24      | 1.209219858 |
| RELL1      | 2.00E-59 | 0.355987  | 0.208 | 0.105 | 4.81E-55 | 2.4 | RELL1     | 1.980952381 |
| PRSS3      | 5.19E-59 | 0.2005737 | 0.059 | 0.014 | 1.25E-54 | 2.4 | PRSS3     | 4.214285714 |
| ITGA23     | 7.38E-59 | 0.3257631 | 0.522 | 0.367 | 1.78E-54 | 2.4 | ITGA2     | 1.422343324 |
| ANKIB1     | 2.54E-58 | 0.4144326 | 0.474 | 0.341 | 6.13E-54 | 2.4 | ANKIB1    | 1.390029326 |
| EPB41L52   | 3.12E-58 | 0.3840041 | 0.414 | 0.278 | 7.53E-54 | 2.4 | EPB41L5   | 1.489208633 |
| ZNRF21     | 5.10E-58 | 0.4484274 | 0.376 | 0.245 | 1.23E-53 | 2.4 | ZNRF2     | 1.534693878 |
| ERBB2IP3   | 5.76E-58 | 0.3911942 | 0.549 | 0.409 | 1.39E-53 | 2.4 | ERBB2IP   | 1.342298289 |
| LYPD61     | 2.21E-57 | 0.291797  | 0.112 | 0.042 | 5.34E-53 | 2.4 | LYPD6     | 2.666666667 |
| TUBA1A2    | 2.25E-57 | 0.7409239 | 0.357 | 0.239 | 5.42E-53 | 2.4 | TUBA1A    | 1.493723849 |
| MAN1A12    | 1.35E-56 | 0.3922631 | 0.337 | 0.211 | 3.25E-52 | 2.4 | MAN1A1    | 1.597156398 |
| PLEKHA81   | 1.42E-56 | 0.3395962 | 0.205 | 0.105 | 3.42E-52 | 2.4 | PLEKHA8   | 1.952380952 |
| SYNE21     | 3.05E-56 | 0.3880352 | 0.654 | 0.529 | 7.37E-52 | 2.4 | SYNE2     | 1.236294896 |
| RASEF3     | 3.16E-56 | 0.3072709 | 0.398 | 0.253 | 7.63E-52 | 2.4 | RASEF     | 1.57312253  |
| CTNNA1     | 3.84E-56 | 0.351312  | 0.647 | 0.521 | 9.26E-52 | 2.4 | CTNNA1    | 1.24184261  |
| TGIF12     | 8.04E-56 | 0.4365976 | 0.322 | 0.204 | 1.94E-51 | 2.4 | TGIF1     | 1.578431373 |
| CDKN1A1    | 9.04E-56 | 0.2747719 | 0.132 | 0.055 | 2.18E-51 | 2.4 | CDKN1A    | 2.4         |
| OCLN2      | 1.22E-55 | 0.4469897 | 0.449 | 0.32  | 2.93E-51 | 2.4 | OCLN      | 1.403125    |
| DCP21      | 2.85E-55 | 0.3491662 | 0.277 | 0.161 | 6.87E-51 | 2.4 | DCP2      | 1.720496894 |
| GPD21      | 3.13E-55 | 0.4796702 | 0.441 | 0.314 | 7.55E-51 | 2.4 | GPD2      | 1.404458599 |
| PPP2R2D1   | 3.63E-55 | 0.3638235 | 0.279 | 0.164 | 8.74E-51 | 2.4 | PPP2R2D   | 1.701219512 |
| MYL12A2    | 6.11E-55 | 0.3657972 | 0.895 | 0.863 | 1.47E-50 | 2.4 | MYL12A    | 1.037079954 |
| SUN11      | 1.05E-54 | 0.3492819 | 0.219 | 0.118 | 2.54E-50 | 2.4 | SUN1      | 1.855932203 |
| KLF64      | 1.75E-54 | 0.3976417 | 0.669 | 0.555 | 4.22E-50 | 2.4 | KLF6      | 1.205405405 |
| CRABP2     | 2.22E-54 | 0.3562114 | 0.207 | 0.109 | 5.36E-50 | 2.4 | CRABP2    | 1.899082569 |
| DLGAP12    | 7.06E-54 | 0.3743737 | 0.311 | 0.187 | 1.70E-49 | 2.4 | DLGAP1    | 1.663101604 |
| NEAT12     | 7.14E-54 | 0.3324352 | 0.98  | 0.942 | 1.72E-49 | 2.4 | NEAT1     | 1.040339703 |
| N4BP2L22   | 1.00E-53 | 0.3340939 | 0.827 | 0.709 | 2.42E-49 | 2.4 | N4BP2L2   | 1.166431594 |
| MYL62      | 1.33E-53 | 0.3226322 | 0.935 | 0.934 | 3.22E-49 | 2.4 | MYL6      | 1.001070664 |
| MPRIP2     | 2.42E-53 | 0.4063894 | 0.369 | 0.244 | 5.84E-49 | 2.4 | MPRIP     | 1.512295082 |
| WDR1       | 5.45E-53 | 0.3950111 | 0.273 | 0.163 | 1.31E-48 | 2.4 | WDR1      | 1.674846626 |
| EXPH5      | 7.32E-53 | 0.3968685 | 0.275 | 0.165 | 1.76E-48 | 2.4 | EXPH5     | 1.666666667 |
| HIF1A      | 1.20E-52 | 0.4667544 | 0.546 | 0.425 | 2.89E-48 | 2.4 | HIF1A     | 1.284705882 |
| TMCO32     | 1.37E-52 | 0.34381   | 0.226 | 0.124 | 3.31E-48 | 2.4 | TMCO3     | 1.822580645 |
| ANKRD123   | 1.42E-52 | 0.291001  | 0.77  | 0.658 | 3.42E-48 | 2.4 | ANKRD12   | 1.170212766 |
| EXOC21     | 1.95E-52 | 0.3797655 | 0.226 | 0.126 | 4.69E-48 | 2.4 | EXOC2     | 1.793650794 |
| MYO1B1     | 2.13E-52 | 0.3686212 | 0.566 | 0.429 | 5.14E-48 | 2.4 | MYO1B     | 1.319347319 |
| TINCR      | 2.15E-52 | 0.1552059 | 0.056 | 0.014 | 5.19E-48 | 2.4 | TINCR     | 4           |
| NR2C21     | 3.44E-52 | 0.3608271 | 0.275 | 0.165 | 8.29E-48 | 2.4 | NR2C2     | 1.666666667 |

|               |          |           |       |       |          |     |           |             |
|---------------|----------|-----------|-------|-------|----------|-----|-----------|-------------|
| UBN22         | 3.58E-52 | 0.3695279 | 0.385 | 0.257 | 8.63E-48 | 2.4 | UBN2      | 1.498054475 |
| KIAA0232      | 6.31E-52 | 0.3973883 | 0.292 | 0.181 | 1.52E-47 | 2.4 | KIAA0232  | 1.613259669 |
| ITGA3         | 1.12E-51 | 0.3875115 | 0.274 | 0.165 | 2.70E-47 | 2.4 | ITGA3     | 1.660606061 |
| ARHGEF3       | 2.11E-51 | 0.4075083 | 0.495 | 0.366 | 5.08E-47 | 2.4 | ARHGEF3   | 1.352459016 |
| MARK31        | 2.52E-51 | 0.3893752 | 0.568 | 0.454 | 6.08E-47 | 2.4 | MARK3     | 1.251101322 |
| PRRG4         | 2.65E-51 | 0.3815091 | 0.369 | 0.248 | 6.40E-47 | 2.4 | PRRG4     | 1.487903226 |
| RND33         | 4.88E-51 | 0.3495516 | 0.465 | 0.333 | 1.18E-46 | 2.4 | RND3      | 1.396396396 |
| SARAF3        | 6.41E-51 | 0.366553  | 0.461 | 0.336 | 1.55E-46 | 2.4 | SARAF     | 1.37202381  |
| DRAM11        | 6.53E-51 | 0.3594895 | 0.409 | 0.279 | 1.57E-46 | 2.4 | DRAM1     | 1.465949821 |
| WHSC11        | 7.84E-51 | 0.3634639 | 0.273 | 0.164 | 1.89E-46 | 2.4 | WHSC1     | 1.664634146 |
| ZFP36L1       | 9.73E-51 | 0.3940988 | 0.682 | 0.578 | 2.35E-46 | 2.4 | ZFP36L1   | 1.179930796 |
| DNAJC123      | 1.29E-50 | 0.1530445 | 0.551 | 0.365 | 3.12E-46 | 2.4 | DNAJC12   | 1.509589041 |
| RUFY3         | 1.34E-50 | 0.3634802 | 0.342 | 0.223 | 3.23E-46 | 2.4 | RUFY3     | 1.533632287 |
| CAB392        | 2.27E-50 | 0.3745252 | 0.471 | 0.344 | 5.46E-46 | 2.4 | CAB39     | 1.369186047 |
| MAST42        | 3.87E-50 | 0.3463474 | 0.648 | 0.509 | 9.33E-46 | 2.4 | MAST4     | 1.273084479 |
| SCARB21       | 5.33E-50 | 0.3593577 | 0.274 | 0.165 | 1.29E-45 | 2.4 | SCARB2    | 1.660606061 |
| WDFY21        | 5.47E-50 | 0.4304608 | 0.369 | 0.25  | 1.32E-45 | 2.4 | WDFY2     | 1.476       |
| HIPK23        | 5.84E-50 | 0.3932885 | 0.481 | 0.356 | 1.41E-45 | 2.4 | HIPK2     | 1.351123596 |
| SLC39A63      | 7.47E-50 | 0.3458766 | 0.421 | 0.284 | 1.80E-45 | 2.4 | SLC39A6   | 1.482394366 |
| RAB27B2       | 7.94E-50 | 0.4524358 | 0.242 | 0.139 | 1.92E-45 | 2.4 | RAB27B    | 1.741007194 |
| UBL53         | 8.26E-50 | 0.2975824 | 0.621 | 0.491 | 1.99E-45 | 2.4 | UBL5      | 1.264765784 |
| TTC39C        | 8.91E-50 | 0.434526  | 0.304 | 0.194 | 2.15E-45 | 2.4 | TTC39C    | 1.567010309 |
| SLC38A12      | 1.25E-49 | 0.3471507 | 0.506 | 0.375 | 3.01E-45 | 2.4 | SLC38A1   | 1.349333333 |
| MOCOS         | 1.75E-49 | 0.3300807 | 0.185 | 0.096 | 4.22E-45 | 2.4 | MOCOS     | 1.927083333 |
| MYBL1         | 1.81E-49 | 0.3623121 | 0.138 | 0.063 | 4.37E-45 | 2.4 | MYBL1     | 2.19047619  |
| TBC1D1        | 2.07E-49 | 0.3520093 | 0.319 | 0.203 | 5.00E-45 | 2.4 | TBC1D1    | 1.571428571 |
| BASP12        | 2.20E-49 | 0.2587701 | 0.11  | 0.044 | 5.31E-45 | 2.4 | BASP1     | 2.5         |
| IDS1          | 2.24E-49 | 0.2774952 | 0.148 | 0.07  | 5.41E-45 | 2.4 | IDS       | 2.114285714 |
| C3orf523      | 3.48E-49 | 0.3266366 | 0.254 | 0.147 | 8.40E-45 | 2.4 | C3orf52   | 1.727891156 |
| SMAD22        | 7.09E-49 | 0.4021821 | 0.406 | 0.288 | 1.71E-44 | 2.4 | SMAD2     | 1.409722222 |
| WWC21         | 8.76E-49 | 0.3640196 | 0.294 | 0.183 | 2.11E-44 | 2.4 | WWC2      | 1.606557377 |
| S1PR31        | 1.19E-48 | 0.1957102 | 0.071 | 0.022 | 2.88E-44 | 2.4 | S1PR3     | 3.227272727 |
| FAM63B        | 2.41E-48 | 0.3617858 | 0.286 | 0.179 | 5.81E-44 | 2.4 | FAM63B    | 1.597765363 |
| SPTAN12       | 3.78E-48 | 0.3548562 | 0.322 | 0.206 | 9.11E-44 | 2.4 | SPTAN1    | 1.563106796 |
| ERO1A1        | 5.28E-48 | 0.350978  | 0.551 | 0.422 | 1.27E-43 | 2.4 | ERO1A     | 1.305687204 |
| DDX3X1        | 5.56E-48 | 0.359441  | 0.47  | 0.347 | 1.34E-43 | 2.4 | DDX3X     | 1.354466859 |
| HSPH13        | 6.47E-48 | 0.2644691 | 0.397 | 0.267 | 1.56E-43 | 2.4 | HSPH1     | 1.486891386 |
| TSPAN16       | 9.40E-48 | 0.3253036 | 0.333 | 0.211 | 2.27E-43 | 2.4 | TSPAN1    | 1.578199052 |
| HIF1A-AS22    | 1.26E-47 | 0.5738544 | 0.224 | 0.131 | 3.03E-43 | 2.4 | HIF1A-AS2 | 1.709923664 |
| ABCC3         | 1.40E-47 | 0.2914357 | 0.151 | 0.072 | 3.38E-43 | 2.4 | ABCC3     | 2.097222222 |
| SIPA1L21      | 1.51E-47 | 0.3811004 | 0.222 | 0.126 | 3.65E-43 | 2.4 | SIPA1L2   | 1.761904762 |
| STK38         | 1.55E-47 | 0.433784  | 0.349 | 0.24  | 3.75E-43 | 2.4 | STK38     | 1.454166667 |
| PDGFB1        | 1.61E-47 | 0.2523091 | 0.089 | 0.032 | 3.88E-43 | 2.4 | PDGFB     | 2.78125     |
| FBXL201       | 2.22E-47 | 0.369701  | 0.419 | 0.3   | 5.35E-43 | 2.4 | FBXL20    | 1.396666667 |
| TMEM87B1      | 2.40E-47 | 0.3350172 | 0.2   | 0.11  | 5.78E-43 | 2.4 | TMEM87B   | 1.818181818 |
| INTS63        | 3.41E-47 | 0.395911  | 0.386 | 0.266 | 8.23E-43 | 2.4 | INTS6     | 1.45112782  |
| WASL3         | 4.90E-47 | 0.3593348 | 0.33  | 0.215 | 1.18E-42 | 2.4 | WASL      | 1.534883721 |
| TAOK32        | 6.58E-47 | 0.417933  | 0.574 | 0.458 | 1.59E-42 | 2.4 | TAOK3     | 1.253275109 |
| PARD31        | 6.96E-47 | 0.3508392 | 0.731 | 0.627 | 1.68E-42 | 2.4 | PARD3     | 1.165869219 |
| LSMEM12       | 7.59E-47 | 0.3061311 | 0.134 | 0.061 | 1.83E-42 | 2.4 | LSMEM1    | 2.196721311 |
| SSH21         | 1.31E-46 | 0.3890883 | 0.497 | 0.374 | 3.15E-42 | 2.4 | SSH2      | 1.328877005 |
| RP11-665G4.12 | 1.36E-46 | 0.2815919 | 0.159 | 0.078 | 3.27E-42 | 2.4 | RP11-665G | 2.038461538 |

|               |          |           |       |       |          |     |            |             |
|---------------|----------|-----------|-------|-------|----------|-----|------------|-------------|
| IGF1R2        | 1.36E-46 | 0.3597944 | 0.603 | 0.488 | 3.28E-42 | 2.4 | IGF1R      | 1.235655738 |
| ARHGAP211     | 1.52E-46 | 0.4272732 | 0.346 | 0.235 | 3.66E-42 | 2.4 | ARHGAP21   | 1.472340426 |
| YWHAZ2        | 1.52E-46 | 0.3392183 | 0.682 | 0.592 | 3.67E-42 | 2.4 | YWHAZ      | 1.152027027 |
| FER           | 1.66E-46 | 0.3774231 | 0.335 | 0.223 | 3.99E-42 | 2.4 | FER        | 1.502242152 |
| SETBP1        | 1.72E-46 | 0.329411  | 0.172 | 0.088 | 4.15E-42 | 2.4 | SETBP1     | 1.954545455 |
| ANKRD44       | 2.75E-46 | 0.2784111 | 0.142 | 0.067 | 6.64E-42 | 2.4 | ANKRD44    | 2.119402985 |
| COL4A62       | 3.37E-46 | 0.2541699 | 0.12  | 0.052 | 8.12E-42 | 2.4 | COL4A6     | 2.307692308 |
| CCDC501       | 3.54E-46 | 0.3860708 | 0.258 | 0.158 | 8.54E-42 | 2.4 | CCDC50     | 1.632911392 |
| TCP11L21      | 3.87E-46 | 0.3296287 | 0.178 | 0.094 | 9.32E-42 | 2.4 | TCP11L2    | 1.893617021 |
| SRGAP11       | 4.00E-46 | 0.353525  | 0.47  | 0.35  | 9.64E-42 | 2.4 | SRGAP1     | 1.342857143 |
| STX2          | 9.25E-46 | 0.1396246 | 0.047 | 0.011 | 2.23E-41 | 2.4 | STX2       | 4.272727273 |
| FOXP11        | 9.96E-46 | 0.2512658 | 0.74  | 0.618 | 2.40E-41 | 2.4 | FOXP1      | 1.197411003 |
| ZBTB382       | 1.15E-45 | 0.3600248 | 0.427 | 0.308 | 2.78E-41 | 2.4 | ZBTB38     | 1.386363636 |
| EZR2          | 1.25E-45 | 0.3515085 | 0.485 | 0.361 | 3.01E-41 | 2.4 | EZR        | 1.343490305 |
| CFL12         | 2.42E-45 | 0.4442462 | 0.416 | 0.302 | 5.84E-41 | 2.4 | CFL1       | 1.377483444 |
| MICAL2        | 2.95E-45 | 0.3436826 | 0.221 | 0.126 | 7.12E-41 | 2.4 | MICAL2     | 1.753968254 |
| RPS6KA33      | 4.40E-45 | 0.2663147 | 0.577 | 0.446 | 1.06E-40 | 2.4 | RPS6KA3    | 1.293721973 |
| RERE3         | 7.51E-45 | 0.2949649 | 0.676 | 0.554 | 1.81E-40 | 2.4 | RERE       | 1.220216606 |
| MIB12         | 8.03E-45 | 0.3614407 | 0.49  | 0.367 | 1.94E-40 | 2.4 | MIB1       | 1.335149864 |
| NRF1          | 8.05E-45 | 0.3374111 | 0.258 | 0.157 | 1.94E-40 | 2.4 | NRF1       | 1.643312102 |
| RP11-21L19.11 | 1.19E-44 | 0.2227937 | 0.06  | 0.018 | 2.88E-40 | 2.4 | RP11-21L19 | 3.333333333 |
| LINC-PINT2    | 1.40E-44 | 0.4686788 | 0.655 | 0.563 | 3.38E-40 | 2.4 | LINC-PINT  | 1.163410302 |
| NRIP31        | 1.72E-44 | 0.2365752 | 0.093 | 0.036 | 4.15E-40 | 2.4 | NRIP3      | 2.583333333 |
| RIC11         | 1.89E-44 | 0.3125661 | 0.265 | 0.163 | 4.56E-40 | 2.4 | RIC1       | 1.625766871 |
| ADCY9         | 3.33E-44 | 0.2798823 | 0.116 | 0.051 | 8.03E-40 | 2.4 | ADCY9      | 2.274509804 |
| VAT11         | 5.21E-44 | 0.2977853 | 0.218 | 0.127 | 1.26E-39 | 2.4 | VAT1       | 1.716535433 |
| ANKS1A1       | 5.67E-44 | 0.3182843 | 0.286 | 0.182 | 1.37E-39 | 2.4 | ANKS1A     | 1.571428571 |
| SRGAP22       | 6.63E-44 | 0.3367812 | 0.227 | 0.134 | 1.60E-39 | 2.4 | SRGAP2     | 1.694029851 |
| LURAP1L2      | 8.69E-44 | 0.3637258 | 0.344 | 0.233 | 2.09E-39 | 2.4 | LURAP1L    | 1.47639485  |
| ACRC3         | 2.59E-43 | 0.3143402 | 0.172 | 0.09  | 6.24E-39 | 2.4 | ACRC       | 1.911111111 |
| SLC20A12      | 2.77E-43 | 0.2703779 | 0.124 | 0.056 | 6.68E-39 | 2.4 | SLC20A1    | 2.214285714 |
| GAREM1        | 3.24E-43 | 0.3905243 | 0.418 | 0.305 | 7.80E-39 | 2.4 | GAREM1     | 1.370491803 |
| MATN33        | 4.15E-43 | 0.1885851 | 0.072 | 0.024 | 1.00E-38 | 2.4 | MATN3      | 3           |
| PRKD12        | 5.12E-43 | 0.4053663 | 0.278 | 0.178 | 1.23E-38 | 2.4 | PRKD1      | 1.561797753 |
| LAMA12        | 6.96E-43 | 0.5597917 | 0.175 | 0.094 | 1.68E-38 | 2.4 | LAMA1      | 1.861702128 |
| SIPA1L12      | 1.09E-42 | 0.3937341 | 0.479 | 0.37  | 2.63E-38 | 2.4 | SIPA1L1    | 1.294594595 |
| UTRN1         | 1.46E-42 | 0.3884796 | 0.373 | 0.264 | 3.52E-38 | 2.4 | UTRN       | 1.412878788 |
| C5orf17       | 1.67E-42 | 0.3765996 | 0.19  | 0.105 | 4.03E-38 | 2.4 | C5orf17    | 1.80952381  |
| MSL12         | 2.17E-42 | 0.3193997 | 0.233 | 0.14  | 5.24E-38 | 2.4 | MSL1       | 1.664285714 |
| FAR2          | 2.39E-42 | 0.2512948 | 0.099 | 0.041 | 5.77E-38 | 2.4 | FAR2       | 2.414634146 |
| SP32          | 2.90E-42 | 0.3596141 | 0.304 | 0.2   | 6.98E-38 | 2.4 | SP3        | 1.52        |
| STK38L1       | 3.47E-42 | 0.3252346 | 0.286 | 0.18  | 8.36E-38 | 2.4 | STK38L     | 1.588888889 |
| KIF3C         | 4.00E-42 | 0.2051562 | 0.082 | 0.03  | 9.64E-38 | 2.4 | KIF3C      | 2.733333333 |
| UBL32         | 4.51E-42 | 0.293307  | 0.295 | 0.188 | 1.09E-37 | 2.4 | UBL3       | 1.569148936 |
| NCOR11        | 5.69E-42 | 0.3659963 | 0.514 | 0.409 | 1.37E-37 | 2.4 | NCOR1      | 1.256723716 |
| QSOX13        | 7.03E-42 | 0.3053304 | 0.235 | 0.139 | 1.70E-37 | 2.4 | QSOX1      | 1.690647482 |
| SLC17A51      | 1.01E-41 | 0.2912969 | 0.164 | 0.086 | 2.43E-37 | 2.4 | SLC17A5    | 1.906976744 |
| FSTL4         | 1.01E-41 | 0.1761637 | 0.047 | 0.012 | 2.44E-37 | 2.4 | FSTL4      | 3.916666667 |
| RNF113        | 1.03E-41 | 0.3146145 | 0.342 | 0.232 | 2.49E-37 | 2.4 | RNF11      | 1.474137931 |
| NRP12         | 1.60E-41 | 0.2513688 | 0.115 | 0.052 | 3.86E-37 | 2.4 | NRP1       | 2.211538462 |
| AC017101.102  | 1.69E-41 | 0.2805729 | 0.159 | 0.082 | 4.08E-37 | 2.4 | AC017101.  | 1.93902439  |
| BNIP3L2       | 2.02E-41 | 0.2932816 | 0.522 | 0.403 | 4.86E-37 | 2.4 | BNIP3L     | 1.29528536  |

|           |          |           |       |       |          |     |          |             |
|-----------|----------|-----------|-------|-------|----------|-----|----------|-------------|
| KIAA04302 | 3.14E-41 | 0.2909063 | 0.207 | 0.119 | 7.57E-37 | 2.4 | KIAA0430 | 1.739495798 |
| CKS23     | 3.14E-41 | 0.3369646 | 0.307 | 0.204 | 7.57E-37 | 2.4 | CKS2     | 1.504901961 |
| YAP11     | 3.37E-41 | 0.3435683 | 0.626 | 0.52  | 8.12E-37 | 2.4 | YAP1     | 1.203846154 |
| MKL21     | 6.98E-41 | 0.3584642 | 0.41  | 0.303 | 1.68E-36 | 2.4 | MKL2     | 1.353135314 |
| SRGAP2B   | 7.36E-41 | 0.2683514 | 0.147 | 0.075 | 1.78E-36 | 2.4 | SRGAP2B  | 1.96        |
| ZMYND81   | 7.95E-41 | 0.3946498 | 0.43  | 0.321 | 1.92E-36 | 2.4 | ZMYND8   | 1.339563863 |
| BTG12     | 8.71E-41 | 0.342188  | 0.671 | 0.567 | 2.10E-36 | 2.4 | BTG1     | 1.183421517 |
| RHOBTB1   | 9.05E-41 | 0.2377447 | 0.084 | 0.032 | 2.18E-36 | 2.4 | RHOBTB1  | 2.625       |
| NOP102    | 1.04E-40 | 0.3308446 | 0.64  | 0.543 | 2.52E-36 | 2.4 | NOP10    | 1.178637201 |
| KLF41     | 1.35E-40 | 0.3197284 | 0.183 | 0.101 | 3.26E-36 | 2.4 | KLF4     | 1.811881188 |
| OTUD7A    | 1.56E-40 | 0.2908049 | 0.168 | 0.09  | 3.77E-36 | 2.4 | OTUD7A   | 1.866666667 |
| CDK192    | 1.60E-40 | 0.3175155 | 0.419 | 0.304 | 3.86E-36 | 2.4 | CDK19    | 1.378289474 |
| LYPD31    | 2.20E-40 | 0.2339895 | 0.12  | 0.055 | 5.30E-36 | 2.4 | LYPD3    | 2.181818182 |
| TTLL51    | 2.53E-40 | 0.3384    | 0.378 | 0.268 | 6.10E-36 | 2.4 | TTLL5    | 1.410447761 |
| INHBB     | 3.65E-40 | 0.1945363 | 0.083 | 0.032 | 8.79E-36 | 2.4 | INHBB    | 2.59375     |
| PVRL22    | 4.21E-40 | 0.2985522 | 0.381 | 0.269 | 1.01E-35 | 2.4 | PVRL2    | 1.416356877 |
| MIR34AHG  | 4.36E-40 | 0.2614041 | 0.123 | 0.058 | 1.05E-35 | 2.4 | MIR34AHG | 2.120689655 |
| ABHD17C1  | 4.93E-40 | 0.3289838 | 0.165 | 0.089 | 1.19E-35 | 2.4 | ABHD17C  | 1.853932584 |
| SPOPL2    | 4.97E-40 | 0.3140305 | 0.357 | 0.245 | 1.20E-35 | 2.4 | SPOPL    | 1.457142857 |
| DIXDC13   | 5.22E-40 | 0.4606266 | 0.187 | 0.105 | 1.26E-35 | 2.4 | DIXDC1   | 1.780952381 |
| DHRX1     | 5.61E-40 | 0.388186  | 0.368 | 0.263 | 1.35E-35 | 2.4 | DHRX     | 1.399239544 |
| MYO1E1    | 9.10E-40 | 0.3298252 | 0.568 | 0.461 | 2.19E-35 | 2.4 | MYO1E    | 1.232104121 |
| ADNP      | 1.13E-39 | 0.3264925 | 0.458 | 0.347 | 2.73E-35 | 2.4 | ADNP     | 1.319884726 |
| SRGAP2C1  | 1.26E-39 | 0.2615661 | 0.138 | 0.069 | 3.03E-35 | 2.4 | SRGAP2C  | 2           |
| TSPAN141  | 1.74E-39 | 0.2618437 | 0.159 | 0.084 | 4.20E-35 | 2.4 | TSPAN14  | 1.892857143 |
| PPP1R21   | 3.03E-39 | 0.3005858 | 0.187 | 0.106 | 7.31E-35 | 2.4 | PPP1R21  | 1.764150943 |
| ADIRF3    | 3.72E-39 | 0.2663433 | 0.125 | 0.059 | 8.98E-35 | 2.4 | ADIRF    | 2.118644068 |
| OBFC1     | 3.73E-39 | 0.2304782 | 0.129 | 0.063 | 8.99E-35 | 2.4 | OBFC1    | 2.047619048 |
| DPY19L11  | 3.75E-39 | 0.2571057 | 0.163 | 0.086 | 9.03E-35 | 2.4 | DPY19L1  | 1.895348837 |
| CAP12     | 4.37E-39 | 0.3416218 | 0.367 | 0.262 | 1.05E-34 | 2.4 | CAP1     | 1.400763359 |
| NKAIN3    | 4.93E-39 | 0.2565002 | 0.087 | 0.035 | 1.19E-34 | 2.4 | NKAIN3   | 2.485714286 |
| RAD23B2   | 5.14E-39 | 0.2673449 | 0.586 | 0.469 | 1.24E-34 | 2.4 | RAD23B   | 1.249466951 |
| NUPR1     | 5.14E-39 | 0.3951343 | 0.246 | 0.154 | 1.24E-34 | 2.4 | NUPR1    | 1.597402597 |
| S100A112  | 5.30E-39 | 0.3650121 | 0.791 | 0.713 | 1.28E-34 | 2.4 | S100A11  | 1.109396914 |
| STAT5A3   | 5.47E-39 | 0.2670131 | 0.268 | 0.167 | 1.32E-34 | 2.4 | STAT5A   | 1.604790419 |
| AK31      | 5.64E-39 | 0.3353068 | 0.292 | 0.194 | 1.36E-34 | 2.4 | AK3      | 1.505154639 |
| MAP4K31   | 1.07E-38 | 0.3237216 | 0.35  | 0.244 | 2.58E-34 | 2.4 | MAP4K3   | 1.43442623  |
| STXBP51   | 1.08E-38 | 0.2990756 | 0.198 | 0.115 | 2.60E-34 | 2.4 | STXBP5   | 1.72173913  |
| NOS1AP2   | 1.40E-38 | 0.2867751 | 0.306 | 0.204 | 3.37E-34 | 2.4 | NOS1AP   | 1.5         |
| LDHA2     | 1.88E-38 | 0.2854053 | 0.744 | 0.655 | 4.54E-34 | 2.4 | LDHA     | 1.135877863 |
| LGALS3    | 2.07E-38 | 0.3665748 | 0.291 | 0.193 | 5.00E-34 | 2.4 | LGALS3   | 1.507772021 |
| TFF33     | 2.07E-38 | 0.3340246 | 0.112 | 0.051 | 5.00E-34 | 2.4 | TFF3     | 2.196078431 |
| PRKCH1    | 2.25E-38 | 0.3950533 | 0.325 | 0.227 | 5.42E-34 | 2.4 | PRKCH    | 1.431718062 |
| CDYL1     | 2.47E-38 | 0.3063622 | 0.409 | 0.297 | 5.95E-34 | 2.4 | CDYL     | 1.377104377 |
| MTM11     | 2.74E-38 | 0.3671928 | 0.265 | 0.172 | 6.62E-34 | 2.4 | MTM1     | 1.540697674 |
| ELL22     | 3.97E-38 | 0.3218366 | 0.764 | 0.686 | 9.58E-34 | 2.4 | ELL2     | 1.113702624 |
| MYO5C     | 4.05E-38 | 0.3258563 | 0.228 | 0.14  | 9.76E-34 | 2.4 | MYO5C    | 1.628571429 |
| TWSG12    | 4.31E-38 | 0.2370306 | 0.142 | 0.072 | 1.04E-33 | 2.4 | TWSG1    | 1.972222222 |
| LIN7A1    | 4.32E-38 | 0.2142596 | 0.094 | 0.04  | 1.04E-33 | 2.4 | LIN7A    | 2.35        |
| STK24     | 8.96E-38 | 0.3438857 | 0.261 | 0.169 | 2.16E-33 | 2.4 | STK24    | 1.544378698 |
| GTDC1     | 8.98E-38 | 0.3055377 | 0.172 | 0.095 | 2.16E-33 | 2.4 | GTDC1    | 1.810526316 |
| OTUD13    | 9.90E-38 | 0.2070592 | 0.101 | 0.044 | 2.39E-33 | 2.4 | OTUD1    | 2.295454545 |

|               |          |           |       |       |          |     |           |             |
|---------------|----------|-----------|-------|-------|----------|-----|-----------|-------------|
| PTPRE         | 1.00E-37 | 0.3049588 | 0.36  | 0.25  | 2.41E-33 | 2.4 | PTPRE     | 1.44        |
| BCL2L11       | 1.14E-37 | 0.2881775 | 0.199 | 0.116 | 2.75E-33 | 2.4 | BCL2L11   | 1.715517241 |
| CFAP692       | 1.65E-37 | 0.2878095 | 0.172 | 0.095 | 3.97E-33 | 2.4 | CFAP69    | 1.810526316 |
| SMCHD12       | 3.31E-37 | 0.3110804 | 0.505 | 0.392 | 7.97E-33 | 2.4 | SMCHD1    | 1.288265306 |
| RGS12         | 3.72E-37 | 0.2273797 | 0.12  | 0.058 | 8.97E-33 | 2.4 | RGS12     | 2.068965517 |
| TSPAN153      | 3.97E-37 | 0.2660937 | 0.171 | 0.093 | 9.56E-33 | 2.4 | TSPAN15   | 1.838709677 |
| FAM102A       | 4.96E-37 | 0.2809177 | 0.212 | 0.127 | 1.20E-32 | 2.4 | FAM102A   | 1.669291339 |
| CHMP52        | 6.97E-37 | 0.3281061 | 0.527 | 0.423 | 1.68E-32 | 2.4 | CHMP5     | 1.245862884 |
| UBE2H2        | 8.06E-37 | 0.2516125 | 0.823 | 0.745 | 1.94E-32 | 2.4 | UBE2H     | 1.104697987 |
| HIST1H2BJ     | 8.76E-37 | 0.3283632 | 0.202 | 0.121 | 2.11E-32 | 2.4 | HIST1H2BJ | 1.669421488 |
| ANO101        | 9.17E-37 | 0.398204  | 0.357 | 0.261 | 2.21E-32 | 2.4 | ANO10     | 1.367816092 |
| PPM1A1        | 9.51E-37 | 0.3019813 | 0.252 | 0.162 | 2.29E-32 | 2.4 | PPM1A     | 1.555555556 |
| PLIN31        | 1.60E-36 | 0.3523282 | 0.232 | 0.147 | 3.85E-32 | 2.4 | PLIN3     | 1.578231293 |
| EP3002        | 1.64E-36 | 0.3040797 | 0.306 | 0.207 | 3.95E-32 | 2.4 | EP300     | 1.47826087  |
| FSIP13        | 2.92E-36 | 0.2025282 | 0.101 | 0.045 | 7.05E-32 | 2.4 | FSIP1     | 2.244444444 |
| MEGF93        | 4.07E-36 | 0.2693031 | 0.206 | 0.122 | 9.81E-32 | 2.4 | MEGF9     | 1.68852459  |
| TRIM581       | 4.49E-36 | 0.1196014 | 0.031 | 0.006 | 1.08E-31 | 2.4 | TRIM58    | 5.166666667 |
| CBL1          | 4.77E-36 | 0.2899535 | 0.184 | 0.106 | 1.15E-31 | 2.4 | CBL       | 1.735849057 |
| SEPT101       | 5.03E-36 | 0.3286851 | 0.23  | 0.146 | 1.21E-31 | 2.4 | Sep-10    | 1.575342466 |
| BRAF1         | 5.28E-36 | 0.3061997 | 0.512 | 0.406 | 1.27E-31 | 2.4 | BRAF      | 1.261083744 |
| IL13RA11      | 6.41E-36 | 0.2866125 | 0.193 | 0.113 | 1.55E-31 | 2.4 | IL13RA1   | 1.707964602 |
| RPS6KA2       | 6.42E-36 | 0.2746361 | 0.248 | 0.156 | 1.55E-31 | 2.4 | RPS6KA2   | 1.58974359  |
| SQLE2         | 6.77E-36 | 0.2963794 | 0.147 | 0.08  | 1.63E-31 | 2.4 | SQLE      | 1.8375      |
| OSBPL83       | 1.29E-35 | 0.2876642 | 0.326 | 0.226 | 3.11E-31 | 2.4 | OSBPL8    | 1.442477876 |
| ARRB1         | 1.29E-35 | 0.2205734 | 0.118 | 0.057 | 3.11E-31 | 2.4 | ARRB1     | 2.070175439 |
| TSC22D11      | 1.48E-35 | 0.3031605 | 0.462 | 0.351 | 3.58E-31 | 2.4 | TSC22D1   | 1.316239316 |
| PLAUR1        | 1.67E-35 | 0.3665141 | 0.272 | 0.179 | 4.03E-31 | 2.4 | PLAUR     | 1.519553073 |
| FAM219A1      | 1.78E-35 | 0.2593887 | 0.172 | 0.097 | 4.28E-31 | 2.4 | FAM219A   | 1.773195876 |
| RHOBTB33      | 1.80E-35 | 0.2719618 | 0.205 | 0.122 | 4.34E-31 | 2.4 | RHOBTB3   | 1.680327869 |
| WIPF22        | 2.16E-35 | 0.3137479 | 0.225 | 0.142 | 5.22E-31 | 2.4 | WIPF2     | 1.584507042 |
| USP35         | 2.25E-35 | 0.3153659 | 0.389 | 0.286 | 5.44E-31 | 2.4 | USP3      | 1.36013986  |
| ZNF365        | 2.97E-35 | 0.1220725 | 0.035 | 0.008 | 7.17E-31 | 2.4 | ZNF365    | 4.375       |
| ACER2         | 3.53E-35 | 0.2130014 | 0.093 | 0.041 | 8.51E-31 | 2.4 | ACER2     | 2.268292683 |
| UACA2         | 3.65E-35 | 0.3089994 | 0.281 | 0.187 | 8.79E-31 | 2.4 | UACA      | 1.502673797 |
| KTN13         | 3.72E-35 | 0.2719421 | 0.629 | 0.529 | 8.96E-31 | 2.4 | KTN1      | 1.189035917 |
| CCDC92        | 4.87E-35 | 0.2148493 | 0.107 | 0.05  | 1.17E-30 | 2.4 | CCDC92    | 2.14        |
| RP11-255H23.4 | 5.24E-35 | 0.2395599 | 0.117 | 0.057 | 1.26E-30 | 2.4 | RP11-255H | 2.052631579 |
| LRP11         | 5.30E-35 | 0.276397  | 0.148 | 0.08  | 1.28E-30 | 2.4 | LRP11     | 1.85        |
| MBTPS11       | 6.93E-35 | 0.259565  | 0.18  | 0.103 | 1.67E-30 | 2.4 | MBTPS1    | 1.747572816 |
| RHOB2         | 9.17E-35 | 0.2676211 | 0.178 | 0.102 | 2.21E-30 | 2.4 | RHOB      | 1.745098039 |
| FBXL7         | 9.68E-35 | 0.3552008 | 0.077 | 0.031 | 2.33E-30 | 2.4 | FBXL7     | 2.483870968 |
| FOSL2         | 1.01E-34 | 0.3271365 | 0.323 | 0.23  | 2.43E-30 | 2.4 | FOSL2     | 1.404347826 |
| CDR2L         | 1.39E-34 | 0.1783317 | 0.083 | 0.035 | 3.35E-30 | 2.4 | CDR2L     | 2.371428571 |
| EMP3          | 1.41E-34 | 0.1739199 | 0.048 | 0.015 | 3.40E-30 | 2.4 | EMP3      | 3.2         |
| RAP2B3        | 1.68E-34 | 0.3244315 | 0.256 | 0.169 | 4.06E-30 | 2.4 | RAP2B     | 1.514792899 |
| FANK12        | 4.25E-34 | 0.3079176 | 0.222 | 0.139 | 1.02E-29 | 2.4 | FANK1     | 1.597122302 |
| NR1D2         | 4.87E-34 | 0.3009785 | 0.32  | 0.222 | 1.17E-29 | 2.4 | NR1D2     | 1.441441441 |
| RAB22A1       | 5.25E-34 | 0.264544  | 0.21  | 0.129 | 1.27E-29 | 2.4 | RAB22A    | 1.627906977 |
| UBE2K1        | 5.80E-34 | 0.337661  | 0.469 | 0.368 | 1.40E-29 | 2.4 | UBE2K     | 1.274456522 |
| ATRX1         | 6.37E-34 | 0.3205074 | 0.563 | 0.469 | 1.54E-29 | 2.4 | ATRX      | 1.200426439 |
| TSC22D24      | 6.98E-34 | 0.1599147 | 0.573 | 0.45  | 1.68E-29 | 2.4 | TSC22D2   | 1.273333333 |
| TMEM30A       | 9.60E-34 | 0.2973676 | 0.261 | 0.174 | 2.32E-29 | 2.4 | TMEM30A   | 1.5         |

|              |          |           |       |       |          |     |           |             |
|--------------|----------|-----------|-------|-------|----------|-----|-----------|-------------|
| MID2         | 9.76E-34 | 0.2316743 | 0.11  | 0.054 | 2.35E-29 | 2.4 | MID2      | 2.037037037 |
| RP1-78O14.13 | 1.08E-33 | 0.2442159 | 0.292 | 0.191 | 2.61E-29 | 2.4 | RP1-78O14 | 1.528795812 |
| FLNB4        | 1.84E-33 | 0.3602089 | 0.55  | 0.443 | 4.44E-29 | 2.4 | FLNB      | 1.241534989 |
| TMEM593      | 2.11E-33 | 0.2770417 | 0.543 | 0.439 | 5.08E-29 | 2.4 | TMEM59    | 1.23690205  |
| GTF2IRD12    | 2.25E-33 | 0.2992384 | 0.24  | 0.155 | 5.43E-29 | 2.4 | GTF2IRD1  | 1.548387097 |
| EIF4G23      | 2.69E-33 | 0.320843  | 0.476 | 0.38  | 6.47E-29 | 2.4 | EIF4G2    | 1.252631579 |
| UBE2R21      | 2.76E-33 | 0.3143566 | 0.453 | 0.357 | 6.66E-29 | 2.4 | UBE2R2    | 1.268907563 |
| MBD22        | 2.84E-33 | 0.32291   | 0.391 | 0.295 | 6.84E-29 | 2.4 | MBD2      | 1.325423729 |
| EMP22        | 1.06E-32 | 0.2774528 | 0.189 | 0.112 | 2.55E-28 | 2.4 | EMP2      | 1.6875      |
| PMAIP12      | 1.07E-32 | 0.2988705 | 0.193 | 0.117 | 2.57E-28 | 2.4 | PMAIP1    | 1.64957265  |
| DDAH1        | 1.08E-32 | 0.2755768 | 0.195 | 0.119 | 2.60E-28 | 2.4 | DDAH1     | 1.638655462 |
| RASAL24      | 1.33E-32 | 0.2212152 | 0.635 | 0.527 | 3.20E-28 | 2.4 | RASAL2    | 1.204933586 |
| BCKDHB       | 1.55E-32 | 0.2762624 | 0.184 | 0.109 | 3.75E-28 | 2.4 | BCKDHB    | 1.688073394 |
| WHSC1L11     | 2.48E-32 | 0.3000923 | 0.343 | 0.248 | 5.98E-28 | 2.4 | WHSC1L1   | 1.383064516 |
| REEP3        | 3.40E-32 | 0.2868443 | 0.35  | 0.257 | 8.20E-28 | 2.4 | REEP3     | 1.361867704 |
| EPB41L4B1    | 3.53E-32 | 0.3168052 | 0.244 | 0.159 | 8.52E-28 | 2.4 | EPB41L4B  | 1.534591195 |
| TMCC32       | 3.94E-32 | 0.1744786 | 0.078 | 0.032 | 9.51E-28 | 2.4 | TMCC3     | 2.4375      |
| CMTM4        | 4.09E-32 | 0.2878703 | 0.22  | 0.14  | 9.87E-28 | 2.4 | CMTM4     | 1.571428571 |
| PLEKHA52     | 6.19E-32 | 0.3854001 | 0.47  | 0.38  | 1.49E-27 | 2.4 | PLEKHA5   | 1.236842105 |
| DACH12       | 7.78E-32 | 0.2592733 | 0.157 | 0.088 | 1.88E-27 | 2.4 | DACH1     | 1.784090909 |
| ATP11C       | 9.29E-32 | 0.2725182 | 0.162 | 0.094 | 2.24E-27 | 2.4 | ATP11C    | 1.723404255 |
| NR6A12       | 1.21E-31 | 0.1836178 | 0.45  | 0.336 | 2.91E-27 | 2.4 | NR6A1     | 1.339285714 |
| TMPRSS2      | 1.25E-31 | 0.2881792 | 0.208 | 0.131 | 3.01E-27 | 2.4 | TMPRSS2   | 1.58778626  |
| LIMD1        | 2.17E-31 | 0.2636514 | 0.125 | 0.066 | 5.22E-27 | 2.4 | LIMD1     | 1.893939394 |
| ARHGAP51     | 2.25E-31 | 0.3309748 | 0.48  | 0.387 | 5.44E-27 | 2.4 | ARHGAP5   | 1.240310078 |
| CDC14A3      | 2.58E-31 | 0.2599529 | 0.233 | 0.15  | 6.22E-27 | 2.4 | CDC14A    | 1.553333333 |
| AC007319.13  | 2.79E-31 | 0.2220305 | 0.147 | 0.081 | 6.74E-27 | 2.4 | AC007319. | 1.814814815 |
| LLGL2        | 4.32E-31 | 0.2468937 | 0.159 | 0.092 | 1.04E-26 | 2.4 | LLGL2     | 1.72826087  |
| APBB21       | 4.36E-31 | 0.2676655 | 0.344 | 0.244 | 1.05E-26 | 2.4 | APBB2     | 1.409836066 |
| PROSER22     | 4.87E-31 | 0.1508641 | 0.118 | 0.06  | 1.17E-26 | 2.4 | PROSER2   | 1.966666667 |
| NINL         | 5.30E-31 | 0.1630064 | 0.068 | 0.027 | 1.28E-26 | 2.4 | NINL      | 2.518518519 |
| SLMAP2       | 5.42E-31 | 0.2383961 | 0.744 | 0.663 | 1.31E-26 | 2.4 | SLMAP     | 1.122171946 |
| CTSZ3        | 5.95E-31 | 0.1911363 | 0.114 | 0.057 | 1.43E-26 | 2.4 | CTSZ      | 2           |
| ATF42        | 7.35E-31 | 0.3153802 | 0.477 | 0.384 | 1.77E-26 | 2.4 | ATF4      | 1.2421875   |
| PANK33       | 8.51E-31 | 0.2588107 | 0.252 | 0.167 | 2.05E-26 | 2.4 | PANK3     | 1.508982036 |
| SHANK2       | 9.28E-31 | 0.2895071 | 0.31  | 0.22  | 2.24E-26 | 2.4 | SHANK2    | 1.409090909 |
| FAM155A2     | 1.07E-30 | 0.4740877 | 0.104 | 0.051 | 2.58E-26 | 2.4 | FAM155A   | 2.039215686 |
| TOM1L11      | 1.44E-30 | 0.3169819 | 0.343 | 0.254 | 3.46E-26 | 2.4 | TOM1L1    | 1.350393701 |
| MISP         | 1.46E-30 | 0.132356  | 0.045 | 0.014 | 3.53E-26 | 2.4 | MISP      | 3.214285714 |
| HSDL1        | 1.53E-30 | 0.1631816 | 0.074 | 0.031 | 3.68E-26 | 2.4 | HSDL1     | 2.387096774 |
| PPP1R13B2    | 1.85E-30 | 0.2922411 | 0.265 | 0.18  | 4.46E-26 | 2.4 | PPP1R13B  | 1.472222222 |
| SLC37A1      | 1.91E-30 | 0.2290249 | 0.139 | 0.077 | 4.61E-26 | 2.4 | SLC37A1   | 1.805194805 |
| PDK43        | 1.91E-30 | 0.2656548 | 0.133 | 0.072 | 4.61E-26 | 2.4 | PDK4      | 1.847222222 |
| GSN          | 2.36E-30 | 0.3151058 | 0.265 | 0.183 | 5.69E-26 | 2.4 | GSN       | 1.448087432 |
| SLC1A4       | 4.64E-30 | 0.1795418 | 0.075 | 0.032 | 1.12E-25 | 2.4 | SLC1A4    | 2.34375     |
| FAM214B1     | 4.76E-30 | 0.1014956 | 0.039 | 0.011 | 1.15E-25 | 2.4 | FAM214B   | 3.545454545 |
| DDR12        | 4.83E-30 | 0.2806896 | 0.292 | 0.204 | 1.16E-25 | 2.4 | DDR1      | 1.431372549 |
| STIM12       | 6.88E-30 | 0.3462224 | 0.305 | 0.222 | 1.66E-25 | 2.4 | STIM1     | 1.373873874 |
| PTPN121      | 7.18E-30 | 0.2907151 | 0.514 | 0.419 | 1.73E-25 | 2.4 | PTPN12    | 1.22673031  |
| MAPK82       | 7.66E-30 | 0.2540295 | 0.422 | 0.32  | 1.85E-25 | 2.4 | MAPK8     | 1.31875     |
| MCU2         | 8.63E-30 | 0.2565374 | 0.189 | 0.116 | 2.08E-25 | 2.4 | MCU       | 1.629310345 |
| AGR23        | 8.99E-30 | 0.1554145 | 0.337 | 0.23  | 2.17E-25 | 2.4 | AGR2      | 1.465217391 |



|                |          |           |       |       |          |     |           |             |
|----------------|----------|-----------|-------|-------|----------|-----|-----------|-------------|
| SSFA2          | 9.11E-30 | 0.2677233 | 0.168 | 0.1   | 2.20E-25 | 2.4 | SSFA2     | 1.68        |
| SFMBT22        | 9.45E-30 | 0.1936866 | 0.244 | 0.158 | 2.28E-25 | 2.4 | SFMBT2    | 1.544303797 |
| SLC36A4        | 9.78E-30 | 0.2297156 | 0.148 | 0.084 | 2.36E-25 | 2.4 | SLC36A4   | 1.761904762 |
| SC5D3          | 1.00E-29 | 0.3155007 | 0.255 | 0.173 | 2.42E-25 | 2.4 | SC5D      | 1.473988439 |
| CLIP1          | 1.05E-29 | 0.2908854 | 0.481 | 0.387 | 2.53E-25 | 2.4 | CLIP1     | 1.242894057 |
| CD1091         | 1.16E-29 | 0.1515752 | 0.062 | 0.024 | 2.79E-25 | 2.4 | CD109     | 2.583333333 |
| TES2           | 1.21E-29 | 0.2768719 | 0.391 | 0.298 | 2.91E-25 | 2.4 | TES       | 1.312080537 |
| MT-ND31        | 1.28E-29 | 0.2390581 | 0.993 | 0.986 | 3.08E-25 | 2.4 | MT-ND3    | 1.007099391 |
| ENAH3          | 1.33E-29 | 0.1919636 | 0.642 | 0.539 | 3.20E-25 | 2.4 | ENAH      | 1.19109462  |
| EFHD13         | 1.49E-29 | 0.167935  | 0.401 | 0.285 | 3.60E-25 | 2.4 | EFHD1     | 1.407017544 |
| TMEM2221       | 1.50E-29 | 0.1866942 | 0.095 | 0.046 | 3.62E-25 | 2.4 | TMEM222   | 2.065217391 |
| AMN1           | 1.51E-29 | 0.3185129 | 0.224 | 0.147 | 3.64E-25 | 2.4 | AMN1      | 1.523809524 |
| FARP1          | 1.60E-29 | 0.2781373 | 0.461 | 0.368 | 3.87E-25 | 2.4 | FARP1     | 1.252717391 |
| SSBP31         | 1.94E-29 | 0.2520376 | 0.188 | 0.116 | 4.67E-25 | 2.4 | SSBP3     | 1.620689655 |
| RP11-486O13.41 | 1.96E-29 | 0.2237217 | 0.163 | 0.095 | 4.72E-25 | 2.4 | RP11-486O | 1.715789474 |
| CDS11          | 2.21E-29 | 0.2453109 | 0.189 | 0.117 | 5.34E-25 | 2.4 | CDS1      | 1.615384615 |
| PIP4K2A2       | 2.80E-29 | 0.2511037 | 0.18  | 0.11  | 6.75E-25 | 2.4 | PIP4K2A   | 1.636363636 |
| SLC10A61       | 2.88E-29 | 0.1298091 | 0.056 | 0.021 | 6.94E-25 | 2.4 | SLC10A6   | 2.666666667 |
| PBX31          | 5.13E-29 | 0.2597421 | 0.143 | 0.082 | 1.24E-24 | 2.4 | PBX3      | 1.743902439 |
| CLDN43         | 5.14E-29 | 0.356145  | 0.268 | 0.187 | 1.24E-24 | 2.4 | CLDN4     | 1.43315508  |
| LAMP13         | 6.05E-29 | 0.2061171 | 0.154 | 0.089 | 1.46E-24 | 2.4 | LAMP1     | 1.730337079 |
| REGG1          | 6.37E-29 | 0.3807522 | 0.268 | 0.186 | 1.54E-24 | 2.4 | REGG      | 1.440860215 |
| SYT17          | 6.85E-29 | 0.1904929 | 0.105 | 0.053 | 1.65E-24 | 2.4 | SYT17     | 1.981132075 |
| PEMT3          | 7.16E-29 | 0.3492314 | 0.076 | 0.033 | 1.73E-24 | 2.4 | PEMT      | 2.303030303 |
| HN1L           | 7.59E-29 | 0.219763  | 0.128 | 0.07  | 1.83E-24 | 2.4 | HN1L      | 1.828571429 |
| FBXL171        | 8.34E-29 | 0.2820189 | 0.348 | 0.254 | 2.01E-24 | 2.4 | FBXL17    | 1.37007874  |
| SDHA           | 8.41E-29 | 0.2093072 | 0.145 | 0.082 | 2.03E-24 | 2.4 | SDHA      | 1.768292683 |
| DAZAP21        | 8.84E-29 | 0.2772919 | 0.502 | 0.413 | 2.13E-24 | 2.4 | DAZAP2    | 1.215496368 |
| BAMBI2         | 8.89E-29 | 0.3063982 | 0.158 | 0.095 | 2.14E-24 | 2.4 | BAMBI     | 1.663157895 |
| RB1CC11        | 1.13E-28 | 0.225307  | 0.567 | 0.469 | 2.73E-24 | 2.4 | RB1CC1    | 1.208955224 |
| NCKAP51        | 1.46E-28 | 0.294342  | 0.25  | 0.167 | 3.52E-24 | 2.4 | NCKAP5    | 1.497005988 |
| FEM1C1         | 1.73E-28 | 0.202316  | 0.131 | 0.072 | 4.16E-24 | 2.4 | FEM1C     | 1.819444444 |
| LAPTM4A3       | 2.30E-28 | 0.258699  | 0.411 | 0.316 | 5.56E-24 | 2.4 | LAPTM4A   | 1.300632911 |
| KRT801         | 2.34E-28 | 0.1867508 | 0.097 | 0.048 | 5.64E-24 | 2.4 | KRT80     | 2.020833333 |
| MAP2K43        | 2.92E-28 | 0.2650271 | 0.528 | 0.43  | 7.03E-24 | 2.4 | MAP2K4    | 1.227906977 |
| AP1S32         | 3.54E-28 | 0.2387025 | 0.184 | 0.113 | 8.53E-24 | 2.4 | AP1S3     | 1.628318584 |
| MPP73          | 3.60E-28 | 0.2519682 | 0.178 | 0.108 | 8.68E-24 | 2.4 | MPP7      | 1.648148148 |
| ARHGEF262      | 3.93E-28 | 0.1955314 | 0.163 | 0.095 | 9.47E-24 | 2.4 | ARHGEF26  | 1.715789474 |
| AMFR2          | 4.54E-28 | 0.2489695 | 0.173 | 0.105 | 1.09E-23 | 2.4 | AMFR      | 1.647619048 |
| DLG52          | 4.68E-28 | 0.3559904 | 0.339 | 0.252 | 1.13E-23 | 2.4 | DLG5      | 1.345238095 |
| ZBTB162        | 4.78E-28 | 0.3697908 | 0.35  | 0.265 | 1.15E-23 | 2.4 | ZBTB16    | 1.320754717 |
| CAMTA12        | 6.43E-28 | 0.2290555 | 0.659 | 0.57  | 1.55E-23 | 2.4 | CAMTA1    | 1.156140351 |
| TSPAN3         | 7.30E-28 | 0.2142512 | 0.124 | 0.067 | 1.76E-23 | 2.4 | TSPAN3    | 1.850746269 |
| FAM188A2       | 7.34E-28 | 0.2089934 | 0.157 | 0.092 | 1.77E-23 | 2.4 | FAM188A   | 1.706521739 |
| SDC3           | 7.38E-28 | 0.1463295 | 0.065 | 0.027 | 1.78E-23 | 2.4 | SDC3      | 2.407407407 |
| HIST1H2AC2     | 7.95E-28 | 0.28423   | 0.45  | 0.353 | 1.92E-23 | 2.4 | HIST1H2AC | 1.274787535 |
| SLAIN22        | 8.01E-28 | 0.2618434 | 0.204 | 0.132 | 1.93E-23 | 2.4 | SLAIN2    | 1.545454545 |
| C2CD31         | 1.00E-27 | 0.2127436 | 0.115 | 0.061 | 2.42E-23 | 2.4 | C2CD3     | 1.885245902 |
| GPBP1L11       | 1.54E-27 | 0.2594928 | 0.423 | 0.332 | 3.71E-23 | 2.4 | GPBP1L1   | 1.274096386 |
| RNF1491        | 1.54E-27 | 0.2996045 | 0.424 | 0.337 | 3.72E-23 | 2.4 | RNF149    | 1.258160237 |
| MXD12          | 1.54E-27 | 0.3349667 | 0.286 | 0.201 | 3.72E-23 | 2.4 | MXD1      | 1.422885572 |
| BAZ2B1         | 1.62E-27 | 0.2588069 | 0.556 | 0.468 | 3.90E-23 | 2.4 | BAZ2B     | 1.188034188 |

|                |          |           |       |       |          |     |           |             |
|----------------|----------|-----------|-------|-------|----------|-----|-----------|-------------|
| RP11-371F15.32 | 1.63E-27 | 0.2732841 | 0.138 | 0.078 | 3.93E-23 | 2.4 | RP11-371F | 1.769230769 |
| PCDH1          | 2.01E-27 | 0.1433123 | 0.062 | 0.025 | 4.83E-23 | 2.4 | PCDH1     | 2.48        |
| BMPR21         | 2.56E-27 | 0.2890796 | 0.344 | 0.256 | 6.18E-23 | 2.4 | BMPR2     | 1.34375     |
| SLC6A62        | 4.11E-27 | 0.2072473 | 0.108 | 0.057 | 9.91E-23 | 2.4 | SLC6A6    | 1.894736842 |
| KRT72          | 5.00E-27 | 0.3267864 | 0.338 | 0.251 | 1.21E-22 | 2.4 | KRT7      | 1.346613546 |
| BAG13          | 5.81E-27 | 0.2086587 | 0.154 | 0.091 | 1.40E-22 | 2.4 | BAG1      | 1.692307692 |
| DEAF1          | 9.41E-27 | 0.2122738 | 0.125 | 0.069 | 2.27E-22 | 2.4 | DEAF1     | 1.811594203 |
| ZFAND53        | 1.14E-26 | 0.2859713 | 0.508 | 0.424 | 2.76E-22 | 2.4 | ZFAND5    | 1.198113208 |
| PTGER32        | 1.24E-26 | 0.2106642 | 0.076 | 0.034 | 2.99E-22 | 2.4 | PTGER3    | 2.235294118 |
| ZBTB202        | 1.26E-26 | 0.2455785 | 0.606 | 0.509 | 3.05E-22 | 2.4 | ZBTB20    | 1.190569745 |
| VPS8           | 1.28E-26 | 0.2460369 | 0.187 | 0.118 | 3.08E-22 | 2.4 | VPS8      | 1.584745763 |
| FILIP1L2       | 1.50E-26 | 0.1999096 | 0.171 | 0.104 | 3.61E-22 | 2.4 | FILIP1L   | 1.644230769 |
| CDK131         | 1.56E-26 | 0.2840222 | 0.498 | 0.413 | 3.77E-22 | 2.4 | CDK13     | 1.205811138 |
| CASK2          | 1.74E-26 | 0.2471517 | 0.455 | 0.36  | 4.19E-22 | 2.4 | CASK      | 1.263888889 |
| SH2D4A         | 1.78E-26 | 0.1963301 | 0.096 | 0.049 | 4.29E-22 | 2.4 | SH2D4A    | 1.959183673 |
| SRI            | 1.80E-26 | 0.2374917 | 0.147 | 0.087 | 4.35E-22 | 2.4 | SRI       | 1.689655172 |
| LMTK22         | 1.87E-26 | 0.3083893 | 0.261 | 0.182 | 4.50E-22 | 2.4 | LMTK2     | 1.434065934 |
| TBC1D82        | 1.89E-26 | 0.323663  | 0.502 | 0.419 | 4.57E-22 | 2.4 | TBC1D8    | 1.198090692 |
| MYPN1          | 2.56E-26 | 0.1098908 | 0.036 | 0.011 | 6.18E-22 | 2.4 | MYPN      | 3.272727273 |
| ME3            | 3.03E-26 | 0.1946547 | 0.086 | 0.042 | 7.32E-22 | 2.4 | ME3       | 2.047619048 |
| JADE1          | 3.17E-26 | 0.2065552 | 0.088 | 0.044 | 7.64E-22 | 2.4 | JADE1     | 2           |
| NR3C11         | 3.24E-26 | 0.2844655 | 0.305 | 0.224 | 7.82E-22 | 2.4 | NR3C1     | 1.361607143 |
| CARS           | 4.46E-26 | 0.2381844 | 0.169 | 0.105 | 1.08E-21 | 2.4 | CARS      | 1.60952381  |
| GAB12          | 4.59E-26 | 0.2118431 | 0.467 | 0.373 | 1.11E-21 | 2.4 | GAB1      | 1.252010724 |
| RTKN22         | 5.07E-26 | 0.1937555 | 0.094 | 0.047 | 1.22E-21 | 2.4 | RTKN2     | 2           |
| SIN3B          | 5.24E-26 | 0.1437472 | 0.068 | 0.03  | 1.26E-21 | 2.4 | SIN3B     | 2.266666667 |
| LEPR           | 5.68E-26 | 0.2672468 | 0.152 | 0.092 | 1.37E-21 | 2.4 | LEPR      | 1.652173913 |
| PAN32          | 5.91E-26 | 0.188026  | 0.71  | 0.627 | 1.42E-21 | 2.4 | PAN3      | 1.132376396 |
| FGF142         | 7.25E-26 | 0.3395236 | 0.138 | 0.079 | 1.75E-21 | 2.4 | FGF14     | 1.746835443 |
| AMPH3          | 8.18E-26 | 0.2517889 | 0.155 | 0.093 | 1.97E-21 | 2.4 | AMPH      | 1.666666667 |
| ABCA41         | 8.86E-26 | 0.1914673 | 0.084 | 0.041 | 2.14E-21 | 2.4 | ABCA4     | 2.048780488 |
| FEM1B3         | 1.14E-25 | 0.2528643 | 0.235 | 0.16  | 2.76E-21 | 2.4 | FEM1B     | 1.46875     |
| PTBP3          | 1.22E-25 | 0.2720496 | 0.436 | 0.348 | 2.93E-21 | 2.4 | PTBP3     | 1.252873563 |
| CDKN2B1        | 1.40E-25 | 0.1057922 | 0.037 | 0.012 | 3.38E-21 | 2.4 | CDKN2B    | 3.083333333 |
| PDZD83         | 1.43E-25 | 0.2392019 | 0.304 | 0.221 | 3.44E-21 | 2.4 | PDZD8     | 1.375565611 |
| PIK3CB1        | 1.70E-25 | 0.2558216 | 0.29  | 0.21  | 4.10E-21 | 2.4 | PIK3CB    | 1.380952381 |
| ANXA32         | 1.80E-25 | 0.303095  | 0.436 | 0.349 | 4.34E-21 | 2.4 | ANXA3     | 1.249283668 |
| FAM214A1       | 1.81E-25 | 0.297558  | 0.303 | 0.224 | 4.37E-21 | 2.4 | FAM214A   | 1.352678571 |
| SOCS61         | 2.03E-25 | 0.2376066 | 0.187 | 0.121 | 4.90E-21 | 2.4 | SOCS6     | 1.545454545 |
| ATP1B32        | 2.22E-25 | 0.320874  | 0.323 | 0.245 | 5.36E-21 | 2.4 | ATP1B3    | 1.318367347 |
| SMAD5          | 2.39E-25 | 0.2284181 | 0.178 | 0.113 | 5.76E-21 | 2.4 | SMAD5     | 1.575221239 |
| VAV33          | 2.52E-25 | 0.2660874 | 0.365 | 0.274 | 6.08E-21 | 2.4 | VAV3      | 1.332116788 |
| SYT91          | 2.79E-25 | 0.1549658 | 0.081 | 0.038 | 6.74E-21 | 2.4 | SYT9      | 2.131578947 |
| PPM1E1         | 3.18E-25 | 0.1925215 | 0.079 | 0.038 | 7.67E-21 | 2.4 | PPM1E     | 2.078947368 |
| RP11-596C23.61 | 3.75E-25 | 0.1808016 | 0.043 | 0.015 | 9.03E-21 | 2.4 | RP11-596C | 2.866666667 |
| RAB322         | 4.17E-25 | 0.2092334 | 0.146 | 0.087 | 1.01E-20 | 2.4 | RAB32     | 1.67816092  |
| KDM4B1         | 4.91E-25 | 0.1855397 | 0.138 | 0.08  | 1.18E-20 | 2.4 | KDM4B     | 1.725       |
| LARP1B3        | 5.15E-25 | 0.202274  | 0.291 | 0.206 | 1.24E-20 | 2.4 | LARP1B    | 1.412621359 |
| TUBB4B1        | 5.49E-25 | 0.2610431 | 0.106 | 0.057 | 1.32E-20 | 2.4 | TUBB4B    | 1.859649123 |
| NETO2          | 7.29E-25 | 0.1802737 | 0.094 | 0.048 | 1.76E-20 | 2.4 | NETO2     | 1.958333333 |
| COL28A1        | 7.42E-25 | 0.1477111 | 0.068 | 0.031 | 1.79E-20 | 2.4 | COL28A1   | 2.193548387 |
| DENND1A1       | 8.22E-25 | 0.2570668 | 0.335 | 0.253 | 1.98E-20 | 2.4 | DENND1A   | 1.324110672 |

|                |          |           |       |       |          |     |            |             |
|----------------|----------|-----------|-------|-------|----------|-----|------------|-------------|
| RP11-148B18.11 | 8.89E-25 | 0.2054893 | 0.084 | 0.041 | 2.14E-20 | 2.4 | RP11-148B  | 2.048780488 |
| TMEM50A1       | 9.24E-25 | 0.2451967 | 0.269 | 0.192 | 2.23E-20 | 2.4 | TMEM50A    | 1.401041667 |
| PDLIM1         | 9.96E-25 | 0.2478213 | 0.176 | 0.113 | 2.40E-20 | 2.4 | PDLIM1     | 1.557522124 |
| XIAP           | 1.15E-24 | 0.2454848 | 0.195 | 0.128 | 2.78E-20 | 2.4 | XIAP       | 1.5234375   |
| KIAA20261      | 1.56E-24 | 0.2448578 | 0.254 | 0.181 | 3.76E-20 | 2.4 | KIAA2026   | 1.403314917 |
| CREBBP1        | 1.67E-24 | 0.2571415 | 0.373 | 0.289 | 4.02E-20 | 2.4 | CREBBP     | 1.290657439 |
| ATAD2B1        | 1.73E-24 | 0.2801908 | 0.265 | 0.192 | 4.17E-20 | 2.4 | ATAD2B     | 1.380208333 |
| RALGAPA11      | 1.78E-24 | 0.2910486 | 0.374 | 0.295 | 4.28E-20 | 2.4 | RALGAPA1   | 1.26779661  |
| NEDD94         | 2.05E-24 | 0.2450916 | 0.452 | 0.36  | 4.94E-20 | 2.4 | NEDD9      | 1.255555556 |
| TMPRSS11E2     | 2.17E-24 | 0.1595433 | 0.094 | 0.048 | 5.23E-20 | 2.4 | TMPRSS11   | 1.958333333 |
| PTGR1          | 2.30E-24 | 0.6372072 | 0.341 | 0.274 | 5.56E-20 | 2.4 | PTGR1      | 1.244525547 |
| GALNT2         | 2.51E-24 | 0.2543875 | 0.206 | 0.138 | 6.05E-20 | 2.4 | GALNT2     | 1.492753623 |
| ISCU           | 2.67E-24 | 0.1591326 | 0.103 | 0.055 | 6.44E-20 | 2.4 | ISCU       | 1.872727273 |
| CDA            | 2.79E-24 | 0.3105731 | 0.051 | 0.02  | 6.72E-20 | 2.4 | CDA        | 2.55        |
| TRIB11         | 2.82E-24 | 0.2490425 | 0.292 | 0.213 | 6.80E-20 | 2.4 | TRIB1      | 1.370892019 |
| LARGE2         | 3.00E-24 | 0.2539864 | 0.404 | 0.316 | 7.24E-20 | 2.4 | LARGE      | 1.278481013 |
| KATNBL11       | 3.52E-24 | 0.3115887 | 0.199 | 0.134 | 8.48E-20 | 2.4 | KATNBL1    | 1.485074627 |
| HNRNPLL        | 3.92E-24 | 0.3277785 | 0.184 | 0.121 | 9.45E-20 | 2.4 | HNRNPLL    | 1.520661157 |
| AHNAK1         | 4.03E-24 | 0.2725668 | 0.43  | 0.345 | 9.73E-20 | 2.4 | AHNAK      | 1.246376812 |
| SCNN1A         | 4.08E-24 | 0.2151098 | 0.176 | 0.112 | 9.83E-20 | 2.4 | SCNN1A     | 1.571428571 |
| TM9SF22        | 4.10E-24 | 0.2185291 | 0.333 | 0.247 | 9.89E-20 | 2.4 | TM9SF2     | 1.348178138 |
| SCMH12         | 4.14E-24 | 0.2811621 | 0.306 | 0.229 | 9.98E-20 | 2.4 | SCMH1      | 1.336244541 |
| ST141          | 4.27E-24 | 0.2833795 | 0.239 | 0.167 | 1.03E-19 | 2.4 | ST14       | 1.431137725 |
| ULK1           | 4.89E-24 | 0.156187  | 0.083 | 0.041 | 1.18E-19 | 2.4 | ULK1       | 2.024390244 |
| PTTG1IP        | 5.92E-24 | 0.2269721 | 0.228 | 0.156 | 1.43E-19 | 2.4 | PTTG1IP    | 1.461538462 |
| C9orf84        | 7.30E-24 | 0.1949567 | 0.11  | 0.061 | 1.76E-19 | 2.4 | C9orf84    | 1.803278689 |
| C1GALT1        | 7.64E-24 | 0.1941275 | 0.137 | 0.081 | 1.84E-19 | 2.4 | C1GALT1    | 1.691358025 |
| AP000304.12    | 1.05E-23 | 0.1846375 | 0.125 | 0.072 | 2.53E-19 | 2.4 | AP000304.  | 1.736111111 |
| ALDH3A21       | 1.07E-23 | 0.1567952 | 0.081 | 0.04  | 2.59E-19 | 2.4 | ALDH3A2    | 2.025       |
| SAMD8          | 1.45E-23 | 0.2049645 | 0.151 | 0.093 | 3.49E-19 | 2.4 | SAMD8      | 1.623655914 |
| PDCD6IP        | 1.62E-23 | 0.2268249 | 0.249 | 0.176 | 3.92E-19 | 2.4 | PDCD6IP    | 1.414772727 |
| TBC1D22A1      | 1.84E-23 | 0.2010649 | 0.214 | 0.144 | 4.45E-19 | 2.4 | TBC1D22A   | 1.486111111 |
| GNB12          | 2.28E-23 | 0.2736353 | 0.413 | 0.335 | 5.49E-19 | 2.4 | GNB1       | 1.232835821 |
| WSB2           | 2.44E-23 | 0.1932537 | 0.136 | 0.081 | 5.89E-19 | 2.4 | WSB2       | 1.679012346 |
| SLC35D2        | 2.63E-23 | 0.1923474 | 0.127 | 0.074 | 6.33E-19 | 2.4 | SLC35D2    | 1.716216216 |
| CERS62         | 2.79E-23 | 0.1930994 | 0.23  | 0.156 | 6.73E-19 | 2.4 | CERS6      | 1.474358974 |
| NUTM2B-AS1     | 2.79E-23 | 0.2670676 | 0.388 | 0.312 | 6.74E-19 | 2.4 | NUTM2B-A   | 1.243589744 |
| RP11-382A20.32 | 2.82E-23 | 0.2159686 | 0.169 | 0.107 | 6.80E-19 | 2.4 | RP11-382A  | 1.579439252 |
| RC3H11         | 2.88E-23 | 0.2351979 | 0.265 | 0.191 | 6.95E-19 | 2.4 | RC3H1      | 1.387434555 |
| KAZN           | 2.90E-23 | 0.287454  | 0.283 | 0.208 | 6.99E-19 | 2.4 | KAZN       | 1.360576923 |
| CPPED1         | 2.96E-23 | 0.1165049 | 0.055 | 0.023 | 7.15E-19 | 2.4 | CPPED1     | 2.391304348 |
| CDR22          | 3.33E-23 | 0.2356157 | 0.236 | 0.165 | 8.04E-19 | 2.4 | CDR2       | 1.43030303  |
| DENND5B        | 3.36E-23 | 0.2313608 | 0.144 | 0.088 | 8.09E-19 | 2.4 | DENND5B    | 1.636363636 |
| SLC25A24       | 4.00E-23 | 0.1909801 | 0.132 | 0.078 | 9.63E-19 | 2.4 | SLC25A24   | 1.692307692 |
| HPS3           | 4.30E-23 | 0.1615383 | 0.079 | 0.039 | 1.04E-18 | 2.4 | HPS3       | 2.025641026 |
| AXL            | 4.55E-23 | 0.1470068 | 0.044 | 0.017 | 1.10E-18 | 2.4 | AXL        | 2.588235294 |
| PCED1B         | 5.43E-23 | 0.2087801 | 0.165 | 0.104 | 1.31E-18 | 2.4 | PCED1B     | 1.586538462 |
| RP11-282I1.11  | 6.18E-23 | 0.1470231 | 0.063 | 0.028 | 1.49E-18 | 2.4 | RP11-282I1 | 2.25        |
| WLS3           | 6.67E-23 | 0.191935  | 0.241 | 0.166 | 1.61E-18 | 2.4 | WLS        | 1.451807229 |
| DLG12          | 8.72E-23 | 0.2050632 | 0.581 | 0.494 | 2.10E-18 | 2.4 | DLG1       | 1.17611336  |
| MLLT31         | 9.20E-23 | 0.2806581 | 0.289 | 0.212 | 2.22E-18 | 2.4 | MLLT3      | 1.363207547 |
| ZNF680         | 9.37E-23 | 0.2241757 | 0.18  | 0.118 | 2.26E-18 | 2.4 | ZNF680     | 1.525423729 |

|               |          |           |       |       |          |     |           |             |
|---------------|----------|-----------|-------|-------|----------|-----|-----------|-------------|
| CAPZB1        | 9.82E-23 | 0.2299629 | 0.252 | 0.179 | 2.37E-18 | 2.4 | CAPZB     | 1.407821229 |
| TRIM292       | 1.05E-22 | 0.1900773 | 0.094 | 0.05  | 2.54E-18 | 2.4 | TRIM29    | 1.88        |
| DYNLRB12      | 1.06E-22 | 0.2248047 | 0.383 | 0.302 | 2.56E-18 | 2.4 | DYNLRB1   | 1.268211921 |
| CTNND23       | 1.07E-22 | 0.2169614 | 0.216 | 0.145 | 2.57E-18 | 2.4 | CTNND2    | 1.489655172 |
| CKAP4         | 1.09E-22 | 0.2549378 | 0.268 | 0.197 | 2.63E-18 | 2.4 | CKAP4     | 1.360406091 |
| ZDHHHC21      | 1.19E-22 | 0.175615  | 0.108 | 0.06  | 2.88E-18 | 2.4 | ZDHHHC21  | 1.8         |
| OXSR12        | 1.29E-22 | 0.2740603 | 0.312 | 0.237 | 3.10E-18 | 2.4 | OXSR1     | 1.316455696 |
| TP53INP2      | 1.37E-22 | 0.1553801 | 0.083 | 0.042 | 3.31E-18 | 2.4 | TP53INP2  | 1.976190476 |
| GULP11        | 1.38E-22 | 0.3112257 | 0.269 | 0.198 | 3.32E-18 | 2.4 | GULP1     | 1.358585859 |
| ITGB61        | 1.40E-22 | 0.2299639 | 0.46  | 0.372 | 3.37E-18 | 2.4 | ITGB6     | 1.23655914  |
| RAPGEF23      | 1.43E-22 | 0.2206007 | 0.493 | 0.411 | 3.44E-18 | 2.4 | RAPGEF2   | 1.199513382 |
| ANLN2         | 1.44E-22 | 0.1505171 | 0.075 | 0.036 | 3.48E-18 | 2.4 | ANLN      | 2.083333333 |
| EXTL3         | 1.55E-22 | 0.2272125 | 0.142 | 0.087 | 3.75E-18 | 2.4 | EXTL3     | 1.632183908 |
| FAM114A12     | 1.67E-22 | 0.2464984 | 0.216 | 0.15  | 4.02E-18 | 2.4 | FAM114A1  | 1.44        |
| MCF22         | 1.75E-22 | 0.117956  | 0.051 | 0.021 | 4.21E-18 | 2.4 | MCF2      | 2.428571429 |
| RP11-289H16.1 | 1.76E-22 | 0.1795648 | 0.102 | 0.056 | 4.23E-18 | 2.4 | RP11-289H | 1.821428571 |
| RP11-455P21.3 | 1.85E-22 | 0.1526907 | 0.063 | 0.029 | 4.46E-18 | 2.4 | RP11-455P | 2.172413793 |
| ACTN13        | 2.50E-22 | 0.2036132 | 0.419 | 0.331 | 6.02E-18 | 2.4 | ACTN1     | 1.265861027 |
| RP11-774D14.1 | 2.89E-22 | 0.2128802 | 0.155 | 0.098 | 6.97E-18 | 2.4 | RP11-774D | 1.581632653 |
| WDR492        | 3.43E-22 | 0.147516  | 0.063 | 0.028 | 8.28E-18 | 2.4 | WDR49     | 2.25        |
| EMC32         | 3.74E-22 | 0.2295831 | 0.303 | 0.227 | 9.03E-18 | 2.4 | EMC3      | 1.334801762 |
| FAM171B3      | 3.80E-22 | 0.1705925 | 0.069 | 0.032 | 9.16E-18 | 2.4 | FAM171B   | 2.15625     |
| MS4A141       | 4.11E-22 | 0.116173  | 0.046 | 0.018 | 9.92E-18 | 2.4 | MS4A14    | 2.555555556 |
| ACADSB3       | 4.38E-22 | 0.167109  | 0.275 | 0.193 | 1.06E-17 | 2.4 | ACADSB    | 1.424870466 |
| TRIM35        | 4.66E-22 | 0.1176472 | 0.046 | 0.018 | 1.12E-17 | 2.4 | TRIM35    | 2.555555556 |
| NFYA1         | 5.10E-22 | 0.1745916 | 0.121 | 0.07  | 1.23E-17 | 2.4 | NFYA      | 1.728571429 |
| VTI1A1        | 5.12E-22 | 0.2337398 | 0.265 | 0.192 | 1.24E-17 | 2.4 | VTI1A     | 1.380208333 |
| AC011288.2    | 5.42E-22 | 0.2134301 | 0.102 | 0.056 | 1.31E-17 | 2.4 | AC011288. | 1.821428571 |
| KIF5C1        | 5.68E-22 | 0.1479478 | 0.062 | 0.028 | 1.37E-17 | 2.4 | KIF5C     | 2.214285714 |
| VOPP12        | 5.90E-22 | 0.1949584 | 0.114 | 0.065 | 1.42E-17 | 2.4 | VOPP1     | 1.753846154 |
| SOWAHC1       | 6.34E-22 | 0.1702832 | 0.077 | 0.038 | 1.53E-17 | 2.4 | SOWAHC    | 2.026315789 |
| ZCCHC7        | 6.46E-22 | 0.3197727 | 0.486 | 0.415 | 1.56E-17 | 2.4 | ZCCHC7    | 1.171084337 |
| ZNF4623       | 9.40E-22 | 0.2786427 | 0.372 | 0.298 | 2.27E-17 | 2.4 | ZNF462    | 1.248322148 |
| TMC7          | 9.78E-22 | 0.1127273 | 0.055 | 0.024 | 2.36E-17 | 2.4 | TMC7      | 2.291666667 |
| MITF1         | 9.97E-22 | 0.1609033 | 0.063 | 0.029 | 2.41E-17 | 2.4 | MITF      | 2.172413793 |
| UFD1L         | 1.01E-21 | 0.1989943 | 0.133 | 0.08  | 2.43E-17 | 2.4 | UFD1L     | 1.6625      |
| NR4A22        | 1.14E-21 | 0.2127138 | 0.162 | 0.103 | 2.75E-17 | 2.4 | NR4A2     | 1.572815534 |
| RP11-96H19.1  | 1.18E-21 | 0.2742901 | 0.261 | 0.188 | 2.84E-17 | 2.4 | RP11-96H1 | 1.388297872 |
| ABAT1         | 1.19E-21 | 0.1780059 | 0.096 | 0.052 | 2.86E-17 | 2.4 | ABAT      | 1.846153846 |
| RNF19A3       | 1.29E-21 | 0.3067218 | 0.637 | 0.564 | 3.12E-17 | 2.4 | RNF19A    | 1.129432624 |
| YY12          | 1.33E-21 | 0.216812  | 0.286 | 0.211 | 3.21E-17 | 2.4 | YY1       | 1.355450237 |
| CLIC62        | 1.35E-21 | 0.2342075 | 0.283 | 0.208 | 3.26E-17 | 2.4 | CLIC6     | 1.360576923 |
| LINC001522    | 1.50E-21 | 0.262597  | 0.395 | 0.312 | 3.62E-17 | 2.4 | LINC00152 | 1.266025641 |
| AHCYL2        | 1.74E-21 | 0.2445689 | 0.162 | 0.105 | 4.20E-17 | 2.4 | AHCYL2    | 1.542857143 |
| ATP8B11       | 1.78E-21 | 0.2451668 | 0.472 | 0.395 | 4.30E-17 | 2.4 | ATP8B1    | 1.194936709 |
| CYTH11        | 1.93E-21 | 0.2067589 | 0.211 | 0.144 | 4.67E-17 | 2.4 | CYTH1     | 1.465277778 |
| PGAM1         | 1.98E-21 | 0.2152428 | 0.178 | 0.118 | 4.77E-17 | 2.4 | PGAM1     | 1.508474576 |
| DYNLT31       | 2.02E-21 | 0.2374473 | 0.338 | 0.26  | 4.88E-17 | 2.4 | DYNLT3    | 1.3         |
| RHOD          | 2.09E-21 | 0.1020896 | 0.039 | 0.014 | 5.04E-17 | 2.4 | RHOD      | 2.785714286 |
| MAFK          | 2.16E-21 | 0.1073065 | 0.028 | 0.009 | 5.21E-17 | 2.4 | MAFK      | 3.111111111 |
| TM2D1         | 2.19E-21 | 0.2294085 | 0.164 | 0.107 | 5.28E-17 | 2.4 | TM2D1     | 1.53271028  |
| NCOA61        | 2.21E-21 | 0.2417779 | 0.228 | 0.162 | 5.33E-17 | 2.4 | NCOA6     | 1.407407407 |

|             |          |           |       |       |          |     |           |             |
|-------------|----------|-----------|-------|-------|----------|-----|-----------|-------------|
| ASXL2       | 2.31E-21 | 0.1989424 | 0.153 | 0.097 | 5.57E-17 | 2.4 | ASXL2     | 1.577319588 |
| LRRC62      | 2.32E-21 | 0.1391781 | 0.078 | 0.039 | 5.60E-17 | 2.4 | LRRC6     | 2           |
| CYB5R4      | 2.38E-21 | 0.1646682 | 0.1   | 0.055 | 5.74E-17 | 2.4 | CYB5R4    | 1.818181818 |
| AC037445.1  | 2.47E-21 | 0.1467333 | 0.093 | 0.05  | 5.96E-17 | 2.4 | AC037445. | 1.86        |
| GALNT32     | 2.76E-21 | 0.2131933 | 0.263 | 0.191 | 6.66E-17 | 2.4 | GALNT3    | 1.376963351 |
| S100A162    | 2.91E-21 | 0.3062369 | 0.212 | 0.147 | 7.02E-17 | 2.4 | S100A16   | 1.442176871 |
| KPNA31      | 2.94E-21 | 0.2431672 | 0.18  | 0.12  | 7.08E-17 | 2.4 | KPNA3     | 1.5         |
| JDP21       | 3.34E-21 | 0.1850981 | 0.085 | 0.044 | 8.04E-17 | 2.4 | JDP2      | 1.931818182 |
| MALT1       | 4.29E-21 | 0.2413397 | 0.176 | 0.117 | 1.03E-16 | 2.4 | MALT1     | 1.504273504 |
| EBF4        | 4.35E-21 | 0.18477   | 0.1   | 0.056 | 1.05E-16 | 2.4 | EBF4      | 1.785714286 |
| FNBP1L2     | 4.88E-21 | 0.2143975 | 0.486 | 0.409 | 1.18E-16 | 2.4 | FNBP1L    | 1.188264059 |
| PICALM1     | 5.97E-21 | 0.2390777 | 0.513 | 0.438 | 1.44E-16 | 2.4 | PICALM    | 1.171232877 |
| REPS11      | 6.00E-21 | 0.3077915 | 0.368 | 0.3   | 1.45E-16 | 2.4 | REPS1     | 1.226666667 |
| FNBP12      | 6.13E-21 | 0.2002101 | 0.592 | 0.517 | 1.48E-16 | 2.4 | FNBP1     | 1.145067698 |
| FOXO3       | 7.05E-21 | 0.2620791 | 0.426 | 0.353 | 1.70E-16 | 2.4 | FOXO3     | 1.206798867 |
| UGDH-AS13   | 7.64E-21 | 0.2001804 | 0.16  | 0.103 | 1.84E-16 | 2.4 | UGDH-AS1  | 1.553398058 |
| RYBP3       | 8.33E-21 | 0.1894839 | 0.242 | 0.171 | 2.01E-16 | 2.4 | RYBP      | 1.415204678 |
| TEX2        | 9.25E-21 | 0.2356757 | 0.15  | 0.095 | 2.23E-16 | 2.4 | TEX2      | 1.578947368 |
| EHMT1       | 9.68E-21 | 0.2387645 | 0.259 | 0.19  | 2.33E-16 | 2.4 | EHMT1     | 1.363157895 |
| TMEM1652    | 1.09E-20 | 0.2576711 | 0.584 | 0.512 | 2.64E-16 | 2.4 | TMEM165   | 1.140625    |
| ROCK23      | 1.10E-20 | 0.2366728 | 0.356 | 0.28  | 2.66E-16 | 2.4 | ROCK2     | 1.271428571 |
| RAD18       | 1.16E-20 | 0.1728881 | 0.119 | 0.07  | 2.80E-16 | 2.4 | RAD18     | 1.7         |
| CYSTEM1     | 1.49E-20 | 0.2153537 | 0.269 | 0.198 | 3.59E-16 | 2.4 | CYSTEM1   | 1.358585859 |
| MBNL12      | 1.54E-20 | 0.2583947 | 0.469 | 0.399 | 3.72E-16 | 2.4 | MBNL1     | 1.175438596 |
| MTHFD22     | 2.11E-20 | 0.2071009 | 0.184 | 0.123 | 5.10E-16 | 2.4 | MTHFD2    | 1.495934959 |
| TMTC22      | 2.18E-20 | 0.2073625 | 0.449 | 0.367 | 5.26E-16 | 2.4 | TMTC2     | 1.223433243 |
| ACTR21      | 2.55E-20 | 0.2153252 | 0.311 | 0.239 | 6.15E-16 | 2.4 | ACTR2     | 1.30125523  |
| HTT1        | 2.58E-20 | 0.202427  | 0.226 | 0.159 | 6.22E-16 | 2.4 | HTT       | 1.421383648 |
| PHF201      | 2.65E-20 | 0.2715468 | 0.421 | 0.347 | 6.40E-16 | 2.4 | PHF20     | 1.213256484 |
| ARFGEF32    | 2.80E-20 | 0.2192793 | 0.343 | 0.266 | 6.75E-16 | 2.4 | ARFGEF3   | 1.289473684 |
| ARIH12      | 3.43E-20 | 0.2135567 | 0.572 | 0.499 | 8.26E-16 | 2.4 | ARIH1     | 1.146292585 |
| CTNND12     | 4.78E-20 | 0.2143955 | 0.463 | 0.386 | 1.15E-15 | 2.4 | CTNND1    | 1.199481865 |
| USP532      | 5.05E-20 | 0.103531  | 0.7   | 0.611 | 1.22E-15 | 2.4 | USP53     | 1.145662848 |
| MICU2       | 5.10E-20 | 0.2167532 | 0.228 | 0.163 | 1.23E-15 | 2.4 | MICU2     | 1.398773006 |
| AP000769.11 | 5.52E-20 | 0.2760865 | 0.186 | 0.127 | 1.33E-15 | 2.4 | AP000769. | 1.464566929 |
| ZC3HAV12    | 5.67E-20 | 0.2119643 | 0.249 | 0.18  | 1.37E-15 | 2.4 | ZC3HAV1   | 1.383333333 |
| XPR12       | 5.93E-20 | 0.2000929 | 0.237 | 0.169 | 1.43E-15 | 2.4 | XPR1      | 1.402366864 |
| SCCPDH      | 6.21E-20 | 0.2008939 | 0.143 | 0.09  | 1.50E-15 | 2.4 | SCCPDH    | 1.588888889 |
| ZFAT1       | 6.30E-20 | 0.1477043 | 0.092 | 0.051 | 1.52E-15 | 2.4 | ZFAT      | 1.803921569 |
| MAP1LC3B1   | 8.18E-20 | 0.2261327 | 0.207 | 0.146 | 1.97E-15 | 2.4 | MAP1LC3B  | 1.417808219 |
| USP124      | 1.06E-19 | 0.2193852 | 0.25  | 0.181 | 2.56E-15 | 2.4 | USP12     | 1.38121547  |
| CCNYL12     | 1.09E-19 | 0.1928646 | 0.128 | 0.079 | 2.63E-15 | 2.4 | CCNYL1    | 1.620253165 |
| GRB102      | 1.15E-19 | 0.2176022 | 0.241 | 0.173 | 2.78E-15 | 2.4 | GRB10     | 1.393063584 |
| C1orf132    | 1.18E-19 | 0.1953864 | 0.154 | 0.1   | 2.84E-15 | 2.4 | C1orf132  | 1.54        |
| ABHD51      | 1.29E-19 | 0.2318093 | 0.275 | 0.205 | 3.11E-15 | 2.4 | ABHD5     | 1.341463415 |
| PINK11      | 1.39E-19 | 0.1605048 | 0.099 | 0.056 | 3.34E-15 | 2.4 | PINK1     | 1.767857143 |
| SDC1        | 1.44E-19 | 0.1078695 | 0.045 | 0.018 | 3.47E-15 | 2.4 | SDC1      | 2.5         |
| SERF23      | 1.71E-19 | 0.230727  | 0.465 | 0.384 | 4.11E-15 | 2.4 | SERF2     | 1.2109375   |
| ASAP2       | 1.78E-19 | 0.1882507 | 0.117 | 0.071 | 4.30E-15 | 2.4 | ASAP2     | 1.647887324 |
| MEX3C2      | 1.84E-19 | 0.1504966 | 0.106 | 0.062 | 4.43E-15 | 2.4 | MEX3C     | 1.709677419 |
| FAM193A     | 1.86E-19 | 0.2202854 | 0.235 | 0.171 | 4.49E-15 | 2.4 | FAM193A   | 1.374269006 |
| ULK41       | 1.87E-19 | 0.2092709 | 0.163 | 0.107 | 4.52E-15 | 2.4 | ULK4      | 1.523364486 |

|               |          |           |       |       |          |     |           |             |
|---------------|----------|-----------|-------|-------|----------|-----|-----------|-------------|
| KANSL11       | 1.89E-19 | 0.2253253 | 0.471 | 0.403 | 4.56E-15 | 2.4 | KANSL1    | 1.168734491 |
| RP11-56B16.51 | 1.94E-19 | 0.1242282 | 0.069 | 0.034 | 4.68E-15 | 2.4 | RP11-56B1 | 2.029411765 |
| PHIP1         | 1.99E-19 | 0.237117  | 0.502 | 0.432 | 4.79E-15 | 2.4 | PHIP      | 1.162037037 |
| MARCKSL12     | 2.13E-19 | 0.2376981 | 0.206 | 0.145 | 5.13E-15 | 2.4 | MARCKSL1  | 1.420689655 |
| PIK3C2B       | 2.21E-19 | 0.1842156 | 0.13  | 0.08  | 5.33E-15 | 2.4 | PIK3C2B   | 1.625       |
| PLEKHA1       | 2.30E-19 | 0.2338351 | 0.209 | 0.149 | 5.55E-15 | 2.4 | PLEKHA1   | 1.402684564 |
| CASZ12        | 2.52E-19 | 0.1965562 | 0.142 | 0.091 | 6.09E-15 | 2.4 | CASZ1     | 1.56043956  |
| UBR21         | 2.56E-19 | 0.2162309 | 0.457 | 0.38  | 6.17E-15 | 2.4 | UBR2      | 1.202631579 |
| TTC281        | 2.56E-19 | 0.2625395 | 0.217 | 0.155 | 6.17E-15 | 2.4 | TTC28     | 1.4         |
| PIGT3         | 2.62E-19 | 0.1091509 | 0.061 | 0.029 | 6.32E-15 | 2.4 | PIGT      | 2.103448276 |
| EFTUD1        | 2.66E-19 | 0.1954245 | 0.212 | 0.147 | 6.41E-15 | 2.4 | EFTUD1    | 1.442176871 |
| KLF81         | 2.82E-19 | 0.1007725 | 0.042 | 0.017 | 6.81E-15 | 2.4 | KLF8      | 2.470588235 |
| IRS13         | 2.86E-19 | 0.2151575 | 0.14  | 0.089 | 6.90E-15 | 2.4 | IRS1      | 1.573033708 |
| ROCK1         | 2.93E-19 | 0.2417599 | 0.293 | 0.227 | 7.07E-15 | 2.4 | ROCK1     | 1.290748899 |
| PPP6R32       | 3.05E-19 | 0.1907873 | 0.573 | 0.499 | 7.36E-15 | 2.4 | PPP6R3    | 1.148296593 |
| VLDLR         | 3.08E-19 | 0.1680918 | 0.091 | 0.051 | 7.44E-15 | 2.4 | VLDLR     | 1.784313725 |
| PRDM101       | 3.36E-19 | 0.1812096 | 0.138 | 0.087 | 8.10E-15 | 2.4 | PRDM10    | 1.586206897 |
| ADK2          | 3.62E-19 | 0.2244151 | 0.543 | 0.473 | 8.73E-15 | 2.4 | ADK       | 1.147991543 |
| SH3RF21       | 3.83E-19 | 0.1966884 | 0.05  | 0.022 | 9.22E-15 | 2.4 | SH3RF2    | 2.272727273 |
| OCIAD2        | 3.87E-19 | 0.1678966 | 0.117 | 0.07  | 9.32E-15 | 2.4 | OCIAD2    | 1.671428571 |
| SEC14L12      | 4.26E-19 | 0.2346928 | 0.214 | 0.153 | 1.03E-14 | 2.4 | SEC14L1   | 1.39869281  |
| KIAA1958      | 5.04E-19 | 0.2270046 | 0.192 | 0.133 | 1.22E-14 | 2.4 | KIAA1958  | 1.443609023 |
| KLF31         | 7.32E-19 | 0.1959246 | 0.159 | 0.106 | 1.76E-14 | 2.4 | KLF3      | 1.5         |
| SMG6          | 7.93E-19 | 0.2122554 | 0.24  | 0.176 | 1.91E-14 | 2.4 | SMG6      | 1.363636364 |
| NUP160        | 8.27E-19 | 0.2023632 | 0.185 | 0.128 | 2.00E-14 | 2.4 | NUP160    | 1.4453125   |
| CCNI1         | 9.19E-19 | 0.1960644 | 0.687 | 0.619 | 2.21E-14 | 2.4 | CCNI      | 1.109854604 |
| STAG11        | 1.08E-18 | 0.2371424 | 0.569 | 0.504 | 2.61E-14 | 2.4 | STAG1     | 1.128968254 |
| DUSP1         | 1.14E-18 | 0.2752393 | 0.264 | 0.198 | 2.74E-14 | 2.4 | DUSP1     | 1.333333333 |
| SPATS2L2      | 1.33E-18 | 0.2413157 | 0.297 | 0.229 | 3.21E-14 | 2.4 | SPATS2L   | 1.296943231 |
| ANKRD172      | 1.44E-18 | 0.2194241 | 0.568 | 0.5   | 3.47E-14 | 2.4 | ANKRD17   | 1.136       |
| SH3KBP12      | 1.45E-18 | 0.1828778 | 0.15  | 0.097 | 3.50E-14 | 2.4 | SH3KBP1   | 1.546391753 |
| ETS21         | 1.54E-18 | 0.1867666 | 0.244 | 0.177 | 3.72E-14 | 2.4 | ETS2      | 1.378531073 |
| BCAS41        | 1.65E-18 | 0.1075164 | 0.058 | 0.027 | 3.97E-14 | 2.4 | BCAS4     | 2.148148148 |
| NUDC1         | 1.72E-18 | 0.19946   | 0.129 | 0.08  | 4.15E-14 | 2.4 | NUDC      | 1.6125      |
| GALNT72       | 1.80E-18 | 0.2144024 | 0.215 | 0.154 | 4.34E-14 | 2.4 | GALNT7    | 1.396103896 |
| ATP6AP23      | 1.83E-18 | 0.1722244 | 0.197 | 0.136 | 4.41E-14 | 2.4 | ATP6AP2   | 1.448529412 |
| ETAA1         | 2.00E-18 | 0.1181581 | 0.064 | 0.032 | 4.81E-14 | 2.4 | ETAA1     | 2           |
| PIK3CA1       | 2.05E-18 | 0.2096786 | 0.349 | 0.277 | 4.94E-14 | 2.4 | PIK3CA    | 1.259927798 |
| DOCK52        | 2.23E-18 | 0.2236439 | 0.265 | 0.2   | 5.38E-14 | 2.4 | DOCK5     | 1.325       |
| CAMSAP21      | 2.45E-18 | 0.2213396 | 0.21  | 0.151 | 5.90E-14 | 2.4 | CAMSAP2   | 1.390728477 |
| RP11-4K16.2   | 2.56E-18 | 0.1155701 | 0.039 | 0.016 | 6.16E-14 | 2.4 | RP11-4K16 | 2.4375      |
| NBPF12        | 2.59E-18 | 0.181343  | 0.13  | 0.082 | 6.25E-14 | 2.4 | NBPF12    | 1.585365854 |
| TFE32         | 2.67E-18 | 0.1545754 | 0.095 | 0.055 | 6.43E-14 | 2.4 | TFE3      | 1.727272727 |
| PANX1         | 2.76E-18 | 0.102858  | 0.053 | 0.024 | 6.66E-14 | 2.4 | PANX1     | 2.208333333 |
| IRF2BPL2      | 2.92E-18 | 0.2624707 | 0.214 | 0.156 | 7.05E-14 | 2.4 | IRF2BPL   | 1.371794872 |
| SCYL21        | 3.23E-18 | 0.222021  | 0.341 | 0.27  | 7.79E-14 | 2.4 | SCYL2     | 1.262962963 |
| RBBP62        | 3.71E-18 | 0.2167527 | 0.343 | 0.272 | 8.94E-14 | 2.4 | RBBP6     | 1.261029412 |
| TNFSF13B1     | 4.18E-18 | 0.145885  | 0.084 | 0.046 | 1.01E-13 | 2.4 | TNFSF13B  | 1.826086957 |
| ARF64         | 4.44E-18 | 0.2021411 | 0.264 | 0.196 | 1.07E-13 | 2.4 | ARF6      | 1.346938776 |
| MICALCL1      | 4.58E-18 | 0.1462791 | 0.07  | 0.036 | 1.10E-13 | 2.4 | MICALCL   | 1.944444444 |
| IBTK2         | 5.08E-18 | 0.1648435 | 0.282 | 0.213 | 1.23E-13 | 2.4 | IBTK      | 1.323943662 |
| GNG121        | 5.25E-18 | 0.1836052 | 0.394 | 0.318 | 1.27E-13 | 2.4 | GNG12     | 1.238993711 |

|               |          |           |       |       |          |     |           |             |
|---------------|----------|-----------|-------|-------|----------|-----|-----------|-------------|
| MLLT43        | 5.43E-18 | 0.1455445 | 0.712 | 0.634 | 1.31E-13 | 2.4 | MLLT4     | 1.123028391 |
| SESN11        | 5.56E-18 | 0.1845738 | 0.169 | 0.113 | 1.34E-13 | 2.4 | SESN1     | 1.495575221 |
| STRN2         | 5.77E-18 | 0.203038  | 0.462 | 0.388 | 1.39E-13 | 2.4 | STRN      | 1.190721649 |
| USP222        | 6.10E-18 | 0.1850076 | 0.169 | 0.114 | 1.47E-13 | 2.4 | USP22     | 1.48245614  |
| BMP2K3        | 6.70E-18 | 0.1815822 | 0.145 | 0.094 | 1.62E-13 | 2.4 | BMP2K     | 1.542553191 |
| MBD51         | 6.79E-18 | 0.2270207 | 0.366 | 0.297 | 1.64E-13 | 2.4 | MBD5      | 1.232323232 |
| DNMBP         | 6.79E-18 | 0.1746835 | 0.108 | 0.065 | 1.64E-13 | 2.4 | DNMBP     | 1.661538462 |
| ZNF264        | 7.05E-18 | 0.176596  | 0.115 | 0.071 | 1.70E-13 | 2.4 | ZNF264    | 1.61971831  |
| RAB12         | 7.13E-18 | 0.1933028 | 0.325 | 0.252 | 1.72E-13 | 2.4 | RAB12     | 1.28968254  |
| NPTN2         | 7.26E-18 | 0.1732963 | 0.255 | 0.187 | 1.75E-13 | 2.4 | NPTN      | 1.363636364 |
| RUBCN2        | 7.57E-18 | 0.1728617 | 0.12  | 0.074 | 1.83E-13 | 2.4 | RUBCN     | 1.621621622 |
| ZNF407        | 7.70E-18 | 0.2064334 | 0.192 | 0.135 | 1.86E-13 | 2.4 | ZNF407    | 1.422222222 |
| DLEU21        | 9.02E-18 | 0.2662644 | 0.278 | 0.214 | 2.18E-13 | 2.4 | DLEU2     | 1.299065421 |
| CREB51        | 9.36E-18 | 0.2435377 | 0.424 | 0.35  | 2.26E-13 | 2.4 | CREB5     | 1.211428571 |
| HMGCLL11      | 9.42E-18 | 0.1254497 | 0.072 | 0.038 | 2.27E-13 | 2.4 | HMGCLL1   | 1.894736842 |
| MARC2         | 1.07E-17 | 0.1153336 | 0.056 | 0.027 | 2.57E-13 | 2.4 | MARC2     | 2.074074074 |
| ATF1          | 1.19E-17 | 0.2208343 | 0.17  | 0.117 | 2.88E-13 | 2.4 | ATF1      | 1.452991453 |
| LOXL2         | 1.22E-17 | 0.1315028 | 0.063 | 0.032 | 2.94E-13 | 2.4 | LOXL2     | 1.96875     |
| CCNY2         | 1.41E-17 | 0.1411905 | 0.322 | 0.252 | 3.41E-13 | 2.4 | CCNY      | 1.277777778 |
| RPGR          | 1.58E-17 | 0.186463  | 0.131 | 0.084 | 3.82E-13 | 2.4 | RPGR      | 1.55952381  |
| RNF1303       | 1.70E-17 | 0.2349981 | 0.227 | 0.169 | 4.09E-13 | 2.4 | RNF130    | 1.343195266 |
| EPHA21        | 1.86E-17 | 0.103145  | 0.05  | 0.023 | 4.49E-13 | 2.4 | EPHA2     | 2.173913043 |
| SHROOM2       | 2.02E-17 | 0.1256218 | 0.085 | 0.048 | 4.87E-13 | 2.4 | SHROOM2   | 1.770833333 |
| NAA252        | 2.07E-17 | 0.1855071 | 0.416 | 0.341 | 5.00E-13 | 2.4 | NAA25     | 1.219941349 |
| MPP3          | 2.20E-17 | 0.1049555 | 0.05  | 0.023 | 5.30E-13 | 2.4 | MPP3      | 2.173913043 |
| CTCF          | 2.20E-17 | 0.1737453 | 0.143 | 0.094 | 5.30E-13 | 2.4 | CTCF      | 1.521276596 |
| NRBP11        | 2.26E-17 | 0.1838038 | 0.12  | 0.075 | 5.45E-13 | 2.4 | NRBP1     | 1.6         |
| GTPBP10       | 2.35E-17 | 0.1963421 | 0.165 | 0.113 | 5.67E-13 | 2.4 | GTPBP10   | 1.460176991 |
| ZDHHC73       | 2.36E-17 | 0.1474742 | 0.102 | 0.06  | 5.68E-13 | 2.4 | ZDHHC7    | 1.7         |
| UBE2G13       | 3.00E-17 | 0.186061  | 0.318 | 0.248 | 7.22E-13 | 2.4 | UBE2G1    | 1.282258065 |
| REPS21        | 3.00E-17 | 0.2150627 | 0.148 | 0.099 | 7.24E-13 | 2.4 | REPS2     | 1.494949495 |
| RP11-189B4.72 | 3.04E-17 | 0.1490058 | 0.09  | 0.052 | 7.32E-13 | 2.4 | RP11-189B | 1.730769231 |
| EIF12         | 3.07E-17 | 0.1417521 | 0.542 | 0.472 | 7.41E-13 | 2.4 | EIF1      | 1.148305085 |
| ACVR1C2       | 3.18E-17 | 0.1114416 | 0.049 | 0.022 | 7.66E-13 | 2.4 | ACVR1C    | 2.227272727 |
| SLC41A21      | 3.24E-17 | 0.2121334 | 0.166 | 0.113 | 7.82E-13 | 2.4 | SLC41A2   | 1.469026549 |
| ZNF7302       | 3.76E-17 | 0.1547849 | 0.124 | 0.078 | 9.08E-13 | 2.4 | ZNF730    | 1.58974359  |
| RTTN1         | 3.94E-17 | 0.1815101 | 0.105 | 0.064 | 9.49E-13 | 2.4 | RTTN      | 1.640625    |
| FNDC3B1       | 4.16E-17 | 0.2356886 | 0.808 | 0.767 | 1.00E-12 | 2.4 | FNDC3B    | 1.05345502  |
| MEX3D2        | 4.26E-17 | 0.1274259 | 0.061 | 0.031 | 1.03E-12 | 2.4 | MEX3D     | 1.967741935 |
| CMTM3         | 4.63E-17 | 0.1261562 | 0.071 | 0.038 | 1.12E-12 | 2.4 | CMTM3     | 1.868421053 |
| AHI1          | 4.88E-17 | 0.2147203 | 0.32  | 0.254 | 1.18E-12 | 2.4 | AHI1      | 1.25984252  |
| F11R3         | 5.17E-17 | 0.1943259 | 0.256 | 0.192 | 1.25E-12 | 2.4 | F11R      | 1.333333333 |
| SIRT12        | 5.24E-17 | 0.2003368 | 0.147 | 0.097 | 1.26E-12 | 2.4 | SIRT1     | 1.515463918 |
| NBAT11        | 5.79E-17 | 0.1894222 | 0.165 | 0.112 | 1.40E-12 | 2.4 | NBAT1     | 1.473214286 |
| MCL12         | 5.83E-17 | 0.1985409 | 0.387 | 0.316 | 1.41E-12 | 2.4 | MCL1      | 1.224683544 |
| ITM2B3        | 6.02E-17 | 0.1962709 | 0.415 | 0.341 | 1.45E-12 | 2.4 | ITM2B     | 1.217008798 |
| MKNK1         | 6.27E-17 | 0.1566333 | 0.106 | 0.064 | 1.51E-12 | 2.4 | MKNK1     | 1.65625     |
| HILPDA2       | 7.26E-17 | 0.2412708 | 0.338 | 0.27  | 1.75E-12 | 2.4 | HILPDA    | 1.251851852 |
| SETDB21       | 8.24E-17 | 0.1356929 | 0.057 | 0.028 | 1.99E-12 | 2.4 | SETDB2    | 2.035714286 |
| PLS31         | 8.56E-17 | 0.2265405 | 0.142 | 0.094 | 2.06E-12 | 2.4 | PLS3      | 1.510638298 |
| KLC11         | 9.07E-17 | 0.1201214 | 0.074 | 0.04  | 2.19E-12 | 2.4 | KLC1      | 1.85        |
| EPAS11        | 9.14E-17 | 0.1900252 | 0.203 | 0.145 | 2.20E-12 | 2.4 | EPAS1     | 1.4         |

|                |          |           |       |       |          |     |            |             |
|----------------|----------|-----------|-------|-------|----------|-----|------------|-------------|
| KIAA13281      | 9.91E-17 | 0.2281308 | 0.172 | 0.119 | 2.39E-12 | 2.4 | KIAA1328   | 1.445378151 |
| ADAM93         | 1.01E-16 | 0.1105962 | 0.634 | 0.558 | 2.44E-12 | 2.4 | ADAM9      | 1.136200717 |
| RP11-1038A11.3 | 1.17E-16 | 0.1189154 | 0.043 | 0.019 | 2.83E-12 | 2.4 | RP11-1038  | 2.263157895 |
| NHS1           | 1.30E-16 | 0.3717414 | 0.216 | 0.162 | 3.12E-12 | 2.4 | NHS        | 1.333333333 |
| CEACAM6        | 1.43E-16 | 0.1279827 | 0.051 | 0.024 | 3.45E-12 | 2.4 | CEACAM6    | 2.125       |
| CSGALNACT1     | 1.45E-16 | 0.186438  | 0.24  | 0.178 | 3.50E-12 | 2.4 | CSGALNAC   | 1.348314607 |
| WDR37          | 1.46E-16 | 0.1933649 | 0.161 | 0.11  | 3.51E-12 | 2.4 | WDR37      | 1.463636364 |
| CASC3          | 1.53E-16 | 0.1923929 | 0.2   | 0.144 | 3.70E-12 | 2.4 | CASC3      | 1.388888889 |
| C4orf322       | 1.61E-16 | 0.1929899 | 0.146 | 0.097 | 3.88E-12 | 2.4 | C4orf32    | 1.505154639 |
| NPLOC4         | 1.83E-16 | 0.2050465 | 0.201 | 0.147 | 4.42E-12 | 2.4 | NPLOC4     | 1.367346939 |
| RP11-350J20.5  | 1.85E-16 | 0.1134354 | 0.053 | 0.025 | 4.46E-12 | 2.4 | RP11-350J2 | 2.12        |
| ARSJ2          | 1.87E-16 | 0.1538473 | 0.087 | 0.05  | 4.51E-12 | 2.4 | ARSJ       | 1.74        |
| SLC12A6        | 1.88E-16 | 0.1395859 | 0.075 | 0.041 | 4.54E-12 | 2.4 | SLC12A6    | 1.829268293 |
| SP41           | 1.88E-16 | 0.1319478 | 0.061 | 0.031 | 4.54E-12 | 2.4 | SP4        | 1.967741935 |
| CARHSP11       | 2.23E-16 | 0.2264105 | 0.329 | 0.264 | 5.37E-12 | 2.4 | CARHSP1    | 1.246212121 |
| PARD6B2        | 2.34E-16 | 0.1831056 | 0.234 | 0.174 | 5.64E-12 | 2.4 | PARD6B     | 1.344827586 |
| SLC35A32       | 2.42E-16 | 0.1857844 | 0.134 | 0.088 | 5.83E-12 | 2.4 | SLC35A3    | 1.522727273 |
| DGKD2          | 2.45E-16 | 0.1814333 | 0.171 | 0.118 | 5.90E-12 | 2.4 | DGKD       | 1.449152542 |
| KCMF13         | 2.46E-16 | 0.1889778 | 0.402 | 0.328 | 5.93E-12 | 2.4 | KCMF1      | 1.225609756 |
| GATA3          | 2.47E-16 | 0.2135414 | 0.245 | 0.186 | 5.95E-12 | 2.4 | GATA3      | 1.317204301 |
| SEMA3E3        | 2.48E-16 | 0.1798999 | 0.192 | 0.135 | 5.97E-12 | 2.4 | SEMA3E     | 1.422222222 |
| TBRG1          | 2.55E-16 | 0.1784939 | 0.145 | 0.097 | 6.14E-12 | 2.4 | TBRG1      | 1.494845361 |
| LGALS1         | 2.63E-16 | 0.3640781 | 0.118 | 0.076 | 6.34E-12 | 2.4 | LGALS1     | 1.552631579 |
| TMEM1642       | 2.65E-16 | 0.1659379 | 0.108 | 0.067 | 6.39E-12 | 2.4 | TMEM164    | 1.611940299 |
| RP11-174G6.12  | 2.69E-16 | 0.1763447 | 0.1   | 0.06  | 6.48E-12 | 2.4 | RP11-174G  | 1.666666667 |
| SLC30A9        | 2.75E-16 | 0.1946974 | 0.202 | 0.146 | 6.64E-12 | 2.4 | SLC30A9    | 1.383561644 |
| ZFAND61        | 2.85E-16 | 0.1926043 | 0.462 | 0.393 | 6.88E-12 | 2.4 | ZFAND6     | 1.175572519 |
| SPON12         | 2.86E-16 | 0.1181143 | 0.062 | 0.032 | 6.90E-12 | 2.4 | SPON1      | 1.9375      |
| AQP31          | 2.95E-16 | 0.1808812 | 0.088 | 0.051 | 7.12E-12 | 2.4 | AQP3       | 1.725490196 |
| WNT9A2         | 3.53E-16 | 0.100095  | 0.056 | 0.028 | 8.50E-12 | 2.4 | WNT9A      | 2           |
| CREBZF2        | 3.81E-16 | 0.1821042 | 0.103 | 0.062 | 9.19E-12 | 2.4 | CREBZF     | 1.661290323 |
| RHBDD11        | 3.82E-16 | 0.2006298 | 0.187 | 0.133 | 9.22E-12 | 2.4 | RHBDD1     | 1.406015038 |
| CMYA51         | 3.87E-16 | 0.1664345 | 0.149 | 0.1   | 9.32E-12 | 2.4 | CMYA5      | 1.49        |
| MPZL31         | 4.20E-16 | 0.2306303 | 0.368 | 0.308 | 1.01E-11 | 2.4 | MPZL3      | 1.194805195 |
| SEPW12         | 4.62E-16 | 0.1869474 | 0.21  | 0.154 | 1.11E-11 | 2.4 | SEPW1      | 1.363636364 |
| CHMP2B1        | 4.68E-16 | 0.1728698 | 0.203 | 0.146 | 1.13E-11 | 2.4 | CHMP2B     | 1.390410959 |
| TNRC18         | 5.56E-16 | 0.1677189 | 0.12  | 0.076 | 1.34E-11 | 2.4 | TNRC18     | 1.578947368 |
| MFSD112        | 5.77E-16 | 0.204393  | 0.135 | 0.09  | 1.39E-11 | 2.4 | MFSD11     | 1.5         |
| BUB3           | 5.99E-16 | 0.1735121 | 0.13  | 0.085 | 1.45E-11 | 2.4 | BUB3       | 1.529411765 |
| MAP71          | 6.78E-16 | 0.2319089 | 0.415 | 0.352 | 1.63E-11 | 2.4 | MAP7       | 1.178977273 |
| KITLG          | 6.80E-16 | 0.1975081 | 0.076 | 0.043 | 1.64E-11 | 2.4 | KITLG      | 1.76744186  |
| OTUD31         | 7.09E-16 | 0.1144917 | 0.077 | 0.043 | 1.71E-11 | 2.4 | OTUD3      | 1.790697674 |
| LINC012071     | 7.23E-16 | 0.1054279 | 0.06  | 0.03  | 1.74E-11 | 2.4 | LINC01207  | 2           |
| ATP2B11        | 7.71E-16 | 0.1434504 | 0.134 | 0.087 | 1.86E-11 | 2.4 | ATP2B1     | 1.540229885 |
| RP11-15H20.7   | 7.75E-16 | 0.1457436 | 0.094 | 0.056 | 1.87E-11 | 2.4 | RP11-15H2  | 1.678571429 |
| SCD1           | 9.79E-16 | 0.2036244 | 0.169 | 0.119 | 2.36E-11 | 2.4 | SCD        | 1.420168067 |
| RPS6KC1        | 1.01E-15 | 0.195358  | 0.15  | 0.102 | 2.44E-11 | 2.4 | RPS6KC1    | 1.470588235 |
| HECA           | 1.18E-15 | 0.1760301 | 0.177 | 0.125 | 2.84E-11 | 2.4 | HECA       | 1.416       |
| TUBB2          | 1.19E-15 | 0.2824335 | 0.386 | 0.33  | 2.86E-11 | 2.4 | TUBB       | 1.16969697  |
| MIDN           | 1.30E-15 | 0.1563747 | 0.098 | 0.059 | 3.14E-11 | 2.4 | MIDN       | 1.661016949 |
| RCN13          | 1.32E-15 | 0.1736888 | 0.203 | 0.147 | 3.17E-11 | 2.4 | RCN1       | 1.380952381 |
| FCHO2          | 1.57E-15 | 0.2180747 | 0.223 | 0.167 | 3.78E-11 | 2.4 | FCHO2      | 1.335329341 |



|                |          |           |       |       |          |     |            |             |
|----------------|----------|-----------|-------|-------|----------|-----|------------|-------------|
| ZCCHC141       | 1.91E-15 | 0.1606832 | 0.104 | 0.064 | 4.61E-11 | 2.4 | ZCCHC14    | 1.625       |
| HIVEP12        | 1.96E-15 | 0.1804153 | 0.245 | 0.185 | 4.72E-11 | 2.4 | HIVEP1     | 1.324324324 |
| DCUN1D21       | 2.01E-15 | 0.1248145 | 0.107 | 0.066 | 4.84E-11 | 2.4 | DCUN1D2    | 1.621212121 |
| SUSD11         | 2.04E-15 | 0.1749515 | 0.143 | 0.096 | 4.92E-11 | 2.4 | SUSD1      | 1.489583333 |
| YWHAG1         | 2.17E-15 | 0.1859818 | 0.309 | 0.246 | 5.23E-11 | 2.4 | YWHAG      | 1.256097561 |
| CTNNAL12       | 2.35E-15 | 0.1652352 | 0.173 | 0.122 | 5.67E-11 | 2.4 | CTNNAL1    | 1.418032787 |
| INPP4A         | 2.46E-15 | 0.1484174 | 0.084 | 0.049 | 5.93E-11 | 2.4 | INPP4A     | 1.714285714 |
| TMEM40         | 2.61E-15 | 0.1468899 | 0.066 | 0.036 | 6.29E-11 | 2.4 | TMEM40     | 1.833333333 |
| RP11-65I12.11  | 2.89E-15 | 0.1554716 | 0.084 | 0.049 | 6.97E-11 | 2.4 | RP11-65I12 | 1.714285714 |
| HOMER13        | 3.26E-15 | 0.1291713 | 0.159 | 0.109 | 7.87E-11 | 2.4 | HOMER1     | 1.458715596 |
| MGEA51         | 3.44E-15 | 0.2121711 | 0.459 | 0.401 | 8.30E-11 | 2.4 | MGEA5      | 1.144638404 |
| TMEM30B1       | 3.46E-15 | 0.1437596 | 0.094 | 0.057 | 8.33E-11 | 2.4 | TMEM30B    | 1.649122807 |
| RFWD23         | 3.49E-15 | 0.199289  | 0.356 | 0.293 | 8.41E-11 | 2.4 | RFWD2      | 1.215017065 |
| ATP6V0B        | 3.63E-15 | 0.1445587 | 0.057 | 0.029 | 8.76E-11 | 2.4 | ATP6V0B    | 1.965517241 |
| DLGAP4         | 3.78E-15 | 0.1960036 | 0.174 | 0.124 | 9.11E-11 | 2.4 | DLGAP4     | 1.403225806 |
| CAST1          | 3.83E-15 | 0.1529816 | 0.57  | 0.503 | 9.23E-11 | 2.4 | CAST       | 1.133200795 |
| WSB11          | 3.85E-15 | 0.1869071 | 0.448 | 0.382 | 9.28E-11 | 2.4 | WSB1       | 1.172774869 |
| DLG3           | 4.03E-15 | 0.1573419 | 0.113 | 0.073 | 9.72E-11 | 2.4 | DLG3       | 1.547945205 |
| MEF2D          | 4.14E-15 | 0.146734  | 0.101 | 0.062 | 9.98E-11 | 2.4 | MEF2D      | 1.629032258 |
| MEIS1          | 4.33E-15 | 0.1886279 | 0.104 | 0.065 | 1.04E-10 | 2.4 | MEIS1      | 1.6         |
| PEBP43         | 4.35E-15 | 0.1343911 | 0.137 | 0.09  | 1.05E-10 | 2.4 | PEBP4      | 1.522222222 |
| XPO1           | 5.25E-15 | 0.1922238 | 0.242 | 0.185 | 1.27E-10 | 2.4 | XPO1       | 1.308108108 |
| ST8SIA61       | 5.31E-15 | 0.205521  | 0.175 | 0.123 | 1.28E-10 | 2.4 | ST8SIA6    | 1.422764228 |
| GOLPH31        | 5.93E-15 | 0.1959974 | 0.316 | 0.256 | 1.43E-10 | 2.4 | GOLPH3     | 1.234375    |
| C20orf1942     | 6.39E-15 | 0.1985688 | 0.221 | 0.166 | 1.54E-10 | 2.4 | C20orf194  | 1.331325301 |
| ELF13          | 6.81E-15 | 0.1583701 | 0.592 | 0.52  | 1.64E-10 | 2.4 | ELF1       | 1.138461538 |
| FLVCR2         | 6.93E-15 | 0.1122546 | 0.067 | 0.037 | 1.67E-10 | 2.4 | FLVCR2     | 1.810810811 |
| FBXO7          | 7.40E-15 | 0.1947787 | 0.19  | 0.139 | 1.78E-10 | 2.4 | FBXO7      | 1.366906475 |
| MAPK62         | 7.63E-15 | 0.1925055 | 0.328 | 0.265 | 1.84E-10 | 2.4 | MAPK6      | 1.237735849 |
| C1orf228       | 7.80E-15 | 0.2054555 | 0.074 | 0.042 | 1.88E-10 | 2.4 | C1orf228   | 1.761904762 |
| TRIB3          | 8.11E-15 | 0.1078211 | 0.042 | 0.02  | 1.96E-10 | 2.4 | TRIB3      | 2.1         |
| RP11-368L12.11 | 8.45E-15 | 0.2066102 | 0.143 | 0.097 | 2.04E-10 | 2.4 | RP11-368L  | 1.474226804 |
| ITGB5          | 8.46E-15 | 0.1502625 | 0.096 | 0.059 | 2.04E-10 | 2.4 | ITGB5      | 1.627118644 |
| RNASE4         | 9.22E-15 | 0.1738079 | 0.147 | 0.101 | 2.22E-10 | 2.4 | RNASE4     | 1.455445545 |
| ANXA6          | 9.30E-15 | 0.1647981 | 0.141 | 0.096 | 2.24E-10 | 2.4 | ANXA6      | 1.46875     |
| EXOC42         | 9.33E-15 | 0.1828383 | 0.394 | 0.329 | 2.25E-10 | 2.4 | EXOC4      | 1.197568389 |
| TRIP121        | 9.86E-15 | 0.1946136 | 0.385 | 0.32  | 2.38E-10 | 2.4 | TRIP12     | 1.203125    |
| GABPA1         | 9.98E-15 | 0.1266863 | 0.081 | 0.047 | 2.41E-10 | 2.4 | GABPA      | 1.723404255 |
| UNC13B1        | 1.01E-14 | 0.1647027 | 0.115 | 0.074 | 2.42E-10 | 2.4 | UNC13B     | 1.554054054 |
| EIF2AK13       | 1.02E-14 | 0.1773158 | 0.154 | 0.107 | 2.45E-10 | 2.4 | EIF2AK1    | 1.439252336 |
| KDM2A1         | 1.03E-14 | 0.1631555 | 0.493 | 0.429 | 2.47E-10 | 2.4 | KDM2A      | 1.149184149 |
| MTMR9          | 1.04E-14 | 0.1409922 | 0.073 | 0.042 | 2.51E-10 | 2.4 | MTMR9      | 1.738095238 |
| AF127936.92    | 1.05E-14 | 0.1469585 | 0.194 | 0.139 | 2.52E-10 | 2.4 | AF127936   | 1.395683453 |
| ZC2HC1A        | 1.07E-14 | 0.1386722 | 0.073 | 0.041 | 2.59E-10 | 2.4 | ZC2HC1A    | 1.780487805 |
| IGFBP23        | 1.08E-14 | 0.1063349 | 0.079 | 0.045 | 2.60E-10 | 2.4 | IGFBP2     | 1.755555556 |
| YPEL52         | 1.12E-14 | 0.1909186 | 0.451 | 0.392 | 2.70E-10 | 2.4 | YPEL5      | 1.150510204 |
| RNF41          | 1.13E-14 | 0.1899126 | 0.214 | 0.16  | 2.73E-10 | 2.4 | RNF4       | 1.3375      |
| FAM208B1       | 1.25E-14 | 0.1951826 | 0.288 | 0.228 | 3.01E-10 | 2.4 | FAM208B    | 1.263157895 |
| TARSL2         | 1.31E-14 | 0.1199253 | 0.05  | 0.025 | 3.15E-10 | 2.4 | TARSL2     | 2           |
| TIPARP         | 1.38E-14 | 0.1652194 | 0.165 | 0.116 | 3.32E-10 | 2.4 | TIPARP     | 1.422413793 |
| CDS2           | 1.38E-14 | 0.1481187 | 0.121 | 0.079 | 3.34E-10 | 2.4 | CDS2       | 1.53164557  |
| SERINC1        | 1.45E-14 | 0.167473  | 0.393 | 0.327 | 3.50E-10 | 2.4 | SERINC1    | 1.201834862 |

|             |          |           |       |       |          |     |           |             |
|-------------|----------|-----------|-------|-------|----------|-----|-----------|-------------|
| ZNF5321     | 1.46E-14 | 0.1633017 | 0.095 | 0.059 | 3.52E-10 | 2.4 | ZNF532    | 1.610169492 |
| EFCAB14     | 1.54E-14 | 0.1511672 | 0.151 | 0.104 | 3.71E-10 | 2.4 | EFCAB14   | 1.451923077 |
| AP2A2       | 1.55E-14 | 0.1847342 | 0.17  | 0.121 | 3.75E-10 | 2.4 | AP2A2     | 1.404958678 |
| ERBB3       | 1.57E-14 | 0.1915356 | 0.175 | 0.127 | 3.79E-10 | 2.4 | ERBB3     | 1.377952756 |
| PTPN211     | 1.59E-14 | 0.1325241 | 0.09  | 0.055 | 3.83E-10 | 2.4 | PTPN21    | 1.636363636 |
| CLMN3       | 1.76E-14 | 0.1477432 | 0.593 | 0.523 | 4.24E-10 | 2.4 | CLMN      | 1.133843212 |
| SRPK21      | 1.83E-14 | 0.1605052 | 0.472 | 0.405 | 4.42E-10 | 2.4 | SRPK2     | 1.165432099 |
| MGAT4A      | 1.91E-14 | 0.1471285 | 0.129 | 0.086 | 4.60E-10 | 2.4 | MGAT4A    | 1.5         |
| GPATCH2     | 1.92E-14 | 0.1747808 | 0.14  | 0.096 | 4.62E-10 | 2.4 | GPATCH2   | 1.458333333 |
| RNF38       | 1.96E-14 | 0.1882987 | 0.286 | 0.226 | 4.73E-10 | 2.4 | RNF38     | 1.265486726 |
| TRAK1       | 2.17E-14 | 0.1919734 | 0.247 | 0.19  | 5.23E-10 | 2.4 | TRAK1     | 1.3         |
| RAP1B1      | 2.39E-14 | 0.171305  | 0.532 | 0.466 | 5.76E-10 | 2.4 | RAP1B     | 1.141630901 |
| AC058791.11 | 2.68E-14 | 0.1649729 | 0.304 | 0.241 | 6.45E-10 | 2.4 | AC058791. | 1.261410788 |
| ZBTB103     | 3.09E-14 | 0.18391   | 0.312 | 0.249 | 7.44E-10 | 2.4 | ZBTB10    | 1.253012048 |
| PPP4R1      | 3.12E-14 | 0.1776215 | 0.286 | 0.226 | 7.52E-10 | 2.4 | PPP4R1    | 1.265486726 |
| TRAPPC101   | 3.38E-14 | 0.1862453 | 0.155 | 0.11  | 8.14E-10 | 2.4 | TRAPPC10  | 1.409090909 |
| ARGLU11     | 3.53E-14 | 0.1819796 | 0.233 | 0.179 | 8.52E-10 | 2.4 | ARGLU1    | 1.301675978 |
| MAGI13      | 3.60E-14 | 0.1402605 | 0.809 | 0.744 | 8.68E-10 | 2.4 | MAGI1     | 1.087365591 |
| SLC22A231   | 3.70E-14 | 0.1519203 | 0.303 | 0.241 | 8.91E-10 | 2.4 | SLC22A23  | 1.257261411 |
| PPP1R12A1   | 3.77E-14 | 0.2023442 | 0.285 | 0.229 | 9.09E-10 | 2.4 | PPP1R12A  | 1.244541485 |
| SCRN12      | 3.86E-14 | 0.1338654 | 0.096 | 0.06  | 9.30E-10 | 2.4 | SCRN1     | 1.6         |
| ZNF4301     | 4.12E-14 | 0.1574937 | 0.111 | 0.072 | 9.93E-10 | 2.4 | ZNF430    | 1.541666667 |
| STX182      | 4.22E-14 | 0.1753716 | 0.224 | 0.168 | 1.02E-09 | 2.4 | STX18     | 1.333333333 |
| PIP4K2C2    | 4.49E-14 | 0.1287792 | 0.113 | 0.073 | 1.08E-09 | 2.4 | PIP4K2C   | 1.547945205 |
| NEDD4       | 4.52E-14 | 0.2060004 | 0.162 | 0.116 | 1.09E-09 | 2.4 | NEDD4     | 1.396551724 |
| RARB2       | 4.66E-14 | 0.1713261 | 0.101 | 0.064 | 1.12E-09 | 2.4 | RARB      | 1.578125    |
| AC008937.21 | 5.16E-14 | 0.1302822 | 0.079 | 0.047 | 1.24E-09 | 2.4 | AC008937. | 1.680851064 |
| S100P1      | 5.38E-14 | 0.1596162 | 0.083 | 0.05  | 1.30E-09 | 2.4 | S100P     | 1.66        |
| TRAPPC92    | 6.05E-14 | 0.1980866 | 0.257 | 0.201 | 1.46E-09 | 2.4 | TRAPPC9   | 1.278606965 |
| LCORL       | 6.13E-14 | 0.1821856 | 0.189 | 0.139 | 1.48E-09 | 2.4 | LCORL     | 1.35971223  |
| PMEPA12     | 6.17E-14 | 0.1468047 | 0.092 | 0.056 | 1.49E-09 | 2.4 | PMEPA1    | 1.642857143 |
| L3MBTL3     | 6.83E-14 | 0.1752719 | 0.11  | 0.072 | 1.65E-09 | 2.4 | L3MBTL3   | 1.527777778 |
| UBE2E11     | 7.14E-14 | 0.229814  | 0.395 | 0.338 | 1.72E-09 | 2.4 | UBE2E1    | 1.168639053 |
| TREM1       | 7.17E-14 | 0.1074285 | 0.038 | 0.017 | 1.73E-09 | 2.4 | TREM1     | 2.235294118 |
| PLXND1      | 7.52E-14 | 0.1066157 | 0.056 | 0.029 | 1.81E-09 | 2.4 | PLXND1    | 1.931034483 |
| MAP3K41     | 7.58E-14 | 0.1587588 | 0.17  | 0.121 | 1.83E-09 | 2.4 | MAP3K4    | 1.404958678 |
| RBM331      | 8.07E-14 | 0.1590827 | 0.19  | 0.139 | 1.95E-09 | 2.4 | RBM33     | 1.366906475 |
| C5orf24     | 8.87E-14 | 0.1152748 | 0.081 | 0.048 | 2.14E-09 | 2.4 | C5orf24   | 1.6875      |
| UBE2Z       | 8.89E-14 | 0.1975633 | 0.257 | 0.202 | 2.14E-09 | 2.4 | UBE2Z     | 1.272277228 |
| UBE2D1      | 9.06E-14 | 0.1464354 | 0.104 | 0.066 | 2.18E-09 | 2.4 | UBE2D1    | 1.575757576 |
| CUL4A1      | 9.08E-14 | 0.201662  | 0.227 | 0.174 | 2.19E-09 | 2.4 | CUL4A     | 1.304597701 |
| ABCC13      | 9.53E-14 | 0.1367476 | 0.143 | 0.098 | 2.30E-09 | 2.4 | ABCC1     | 1.459183673 |
| CAPG        | 9.67E-14 | 0.1073279 | 0.049 | 0.025 | 2.33E-09 | 2.4 | CAPG      | 1.96        |
| NUTM2A-AS12 | 9.81E-14 | 0.1836229 | 0.354 | 0.295 | 2.37E-09 | 2.4 | NUTM2A-A  | 1.2         |
| CST33       | 1.10E-13 | 0.1065416 | 0.1   | 0.062 | 2.65E-09 | 2.4 | CST3      | 1.612903226 |
| KIF27       | 1.11E-13 | 0.1444348 | 0.103 | 0.066 | 2.68E-09 | 2.4 | KIF27     | 1.560606061 |
| RALGAPB     | 1.25E-13 | 0.1961489 | 0.195 | 0.146 | 3.02E-09 | 2.4 | RALGAPB   | 1.335616438 |
| YWHAH2      | 1.26E-13 | 0.1589438 | 0.26  | 0.203 | 3.03E-09 | 2.4 | YWHAH     | 1.280788177 |
| ARID1A      | 1.29E-13 | 0.1859006 | 0.288 | 0.234 | 3.11E-09 | 2.4 | ARID1A    | 1.230769231 |
| SRP143      | 1.36E-13 | 0.1406008 | 0.888 | 0.872 | 3.27E-09 | 2.4 | SRP14     | 1.018348624 |
| TDRD3       | 1.40E-13 | 0.1835259 | 0.143 | 0.101 | 3.37E-09 | 2.4 | TDRD3     | 1.415841584 |
| CHFR        | 1.40E-13 | 0.152477  | 0.125 | 0.084 | 3.38E-09 | 2.4 | CHFR      | 1.488095238 |

|           |          |           |       |       |          |     |          |             |
|-----------|----------|-----------|-------|-------|----------|-----|----------|-------------|
| EHD21     | 1.49E-13 | 0.1346757 | 0.087 | 0.054 | 3.59E-09 | 2.4 | EHD2     | 1.611111111 |
| UBE2I1    | 2.03E-13 | 0.1491569 | 0.165 | 0.118 | 4.90E-09 | 2.4 | UBE2I    | 1.398305085 |
| PRRC2B    | 2.22E-13 | 0.1703792 | 0.268 | 0.213 | 5.36E-09 | 2.4 | PRRC2B   | 1.258215962 |
| DNAJC1    | 2.30E-13 | 0.1918891 | 0.313 | 0.255 | 5.55E-09 | 2.4 | DNAJC1   | 1.22745098  |
| GM2A      | 2.32E-13 | 0.1311667 | 0.064 | 0.036 | 5.61E-09 | 2.4 | GM2A     | 1.777777778 |
| WASF21    | 2.38E-13 | 0.1587242 | 0.303 | 0.243 | 5.75E-09 | 2.4 | WASF2    | 1.24691358  |
| CIB11     | 2.39E-13 | 0.1341886 | 0.045 | 0.022 | 5.77E-09 | 2.4 | CIB1     | 2.045454545 |
| ROBO21    | 2.41E-13 | 0.1489514 | 0.106 | 0.069 | 5.80E-09 | 2.4 | ROBO2    | 1.536231884 |
| PLSCR22   | 2.69E-13 | 0.1329397 | 0.089 | 0.055 | 6.49E-09 | 2.4 | PLSCR2   | 1.618181818 |
| C2CD4A3   | 2.85E-13 | 0.1249025 | 0.076 | 0.045 | 6.87E-09 | 2.4 | C2CD4A   | 1.688888889 |
| LATS22    | 3.13E-13 | 0.1570995 | 0.149 | 0.105 | 7.54E-09 | 2.4 | LATS2    | 1.419047619 |
| KCNK12    | 3.32E-13 | 0.1964519 | 0.201 | 0.152 | 8.00E-09 | 2.4 | KCNK1    | 1.322368421 |
| RALGPS1   | 3.34E-13 | 0.1385046 | 0.091 | 0.057 | 8.05E-09 | 2.4 | RALGPS1  | 1.596491228 |
| CD1643    | 3.53E-13 | 0.1169209 | 0.341 | 0.274 | 8.52E-09 | 2.4 | CD164    | 1.244525547 |
| MBOAT1    | 3.81E-13 | 0.187029  | 0.178 | 0.13  | 9.18E-09 | 2.4 | MBOAT1   | 1.369230769 |
| HMGCR1    | 3.96E-13 | 0.1689849 | 0.125 | 0.086 | 9.55E-09 | 2.4 | HMGCR    | 1.453488372 |
| ASNS2     | 4.03E-13 | 0.1753643 | 0.12  | 0.081 | 9.73E-09 | 2.4 | ASNS     | 1.481481481 |
| DYNC1LI2  | 4.59E-13 | 0.174975  | 0.279 | 0.224 | 1.11E-08 | 2.4 | DYNC1LI2 | 1.245535714 |
| IL4R1     | 4.88E-13 | 0.1799473 | 0.182 | 0.136 | 1.18E-08 | 2.4 | IL4R     | 1.338235294 |
| GARS2     | 5.33E-13 | 0.1846586 | 0.224 | 0.173 | 1.29E-08 | 2.4 | GARS     | 1.294797688 |
| COG53     | 5.56E-13 | 0.1910939 | 0.496 | 0.439 | 1.34E-08 | 2.4 | COG5     | 1.129840547 |
| CEP1281   | 5.93E-13 | 0.1621589 | 0.092 | 0.058 | 1.43E-08 | 2.4 | CEP128   | 1.586206897 |
| DDAH2     | 6.01E-13 | 0.1358084 | 0.065 | 0.037 | 1.45E-08 | 2.4 | DDAH2    | 1.756756757 |
| GRB7      | 6.18E-13 | 0.1741582 | 0.166 | 0.12  | 1.49E-08 | 2.4 | GRB7     | 1.383333333 |
| VEZT1     | 6.25E-13 | 0.1838877 | 0.425 | 0.364 | 1.51E-08 | 2.4 | VEZT     | 1.167582418 |
| RASD1     | 6.32E-13 | 0.1423324 | 0.085 | 0.053 | 1.52E-08 | 2.4 | RASD1    | 1.603773585 |
| PLP22     | 6.41E-13 | 0.1193509 | 0.103 | 0.067 | 1.54E-08 | 2.4 | PLP2     | 1.537313433 |
| PTPRR1    | 6.72E-13 | 0.1245041 | 0.066 | 0.037 | 1.62E-08 | 2.4 | PTPRR    | 1.783783784 |
| PDE5A     | 7.23E-13 | 0.1884318 | 0.13  | 0.091 | 1.74E-08 | 2.4 | PDE5A    | 1.428571429 |
| RALA1     | 7.27E-13 | 0.1825654 | 0.264 | 0.208 | 1.75E-08 | 2.4 | RALA     | 1.269230769 |
| ARL33     | 7.55E-13 | 0.1724924 | 0.311 | 0.251 | 1.82E-08 | 2.4 | ARL3     | 1.239043825 |
| LRP10     | 7.58E-13 | 0.1544218 | 0.176 | 0.13  | 1.83E-08 | 2.4 | LRP10    | 1.353846154 |
| REEP53    | 8.35E-13 | 0.1376827 | 0.306 | 0.246 | 2.01E-08 | 2.4 | REEP5    | 1.243902439 |
| ITPR31    | 9.07E-13 | 0.1254485 | 0.112 | 0.074 | 2.19E-08 | 2.4 | ITPR3    | 1.513513514 |
| ATE12     | 9.71E-13 | 0.1588792 | 0.166 | 0.121 | 2.34E-08 | 2.4 | ATE1     | 1.371900826 |
| LIMA1     | 9.76E-13 | 0.2106851 | 0.45  | 0.393 | 2.35E-08 | 2.4 | LIMA1    | 1.145038168 |
| KIAA08953 | 1.14E-12 | 0.1203881 | 0.08  | 0.048 | 2.74E-08 | 2.4 | KIAA0895 | 1.666666667 |
| GBE14     | 1.15E-12 | 0.1305373 | 0.416 | 0.35  | 2.77E-08 | 2.4 | GBE1     | 1.188571429 |
| VASP2     | 1.19E-12 | 0.1188604 | 0.094 | 0.06  | 2.86E-08 | 2.4 | VASP     | 1.566666667 |
| NDFIP1    | 1.29E-12 | 0.1739391 | 0.24  | 0.188 | 3.12E-08 | 2.4 | NDFIP1   | 1.276595745 |
| EMC102    | 1.32E-12 | 0.1053373 | 0.089 | 0.056 | 3.19E-08 | 2.4 | EMC10    | 1.589285714 |
| ELF22     | 1.42E-12 | 0.1747016 | 0.439 | 0.382 | 3.42E-08 | 2.4 | ELF2     | 1.14921466  |
| FAM35A    | 1.58E-12 | 0.1477626 | 0.178 | 0.132 | 3.81E-08 | 2.4 | FAM35A   | 1.348484848 |
| GADD45B3  | 1.64E-12 | 0.1856862 | 0.148 | 0.104 | 3.95E-08 | 2.4 | GADD45B  | 1.423076923 |
| YPEL21    | 1.64E-12 | 0.1566882 | 0.153 | 0.11  | 3.97E-08 | 2.4 | YPEL2    | 1.390909091 |
| PSAP2     | 1.68E-12 | 0.1329709 | 0.162 | 0.117 | 4.04E-08 | 2.4 | PSAP     | 1.384615385 |
| SS18L1    | 2.00E-12 | 0.102264  | 0.057 | 0.032 | 4.82E-08 | 2.4 | SS18L1   | 1.78125     |
| LIFR2     | 2.34E-12 | 0.1625215 | 0.194 | 0.146 | 5.63E-08 | 2.4 | LIFR     | 1.328767123 |
| SOS12     | 2.36E-12 | 0.1800413 | 0.424 | 0.362 | 5.69E-08 | 2.4 | SOS1     | 1.171270718 |
| ISG20     | 2.45E-12 | 0.1172798 | 0.099 | 0.064 | 5.91E-08 | 2.4 | ISG20    | 1.546875    |
| SLC7A12   | 2.56E-12 | 0.1431229 | 0.16  | 0.116 | 6.18E-08 | 2.4 | SLC7A1   | 1.379310345 |
| TCF251    | 2.87E-12 | 0.1464774 | 0.168 | 0.124 | 6.91E-08 | 2.4 | TCF25    | 1.35483871  |

|               |          |           |       |       |          |     |           |             |
|---------------|----------|-----------|-------|-------|----------|-----|-----------|-------------|
| FAM177A12     | 3.02E-12 | 0.1277427 | 0.165 | 0.12  | 7.29E-08 | 2.4 | FAM177A1  | 1.375       |
| POC1B1        | 3.58E-12 | 0.1798617 | 0.148 | 0.107 | 8.62E-08 | 2.4 | POC1B     | 1.38317757  |
| WNK12         | 3.77E-12 | 0.1635744 | 0.291 | 0.235 | 9.10E-08 | 2.4 | WNK1      | 1.238297872 |
| BCL102        | 3.81E-12 | 0.1533652 | 0.187 | 0.139 | 9.19E-08 | 2.4 | BCL10     | 1.345323741 |
| MXI11         | 4.07E-12 | 0.1729764 | 0.236 | 0.186 | 9.81E-08 | 2.4 | MXI1      | 1.268817204 |
| RAB11FIP41    | 4.21E-12 | 0.1035991 | 0.068 | 0.04  | 1.02E-07 | 2.4 | RAB11FIP4 | 1.7         |
| RP11-83A24.23 | 4.31E-12 | 0.1967119 | 0.169 | 0.127 | 1.04E-07 | 2.4 | RP11-83A2 | 1.330708661 |
| CROT          | 4.46E-12 | 0.1094673 | 0.07  | 0.042 | 1.08E-07 | 2.4 | CROT      | 1.666666667 |
| HACD2         | 4.70E-12 | 0.1375537 | 0.127 | 0.088 | 1.13E-07 | 2.4 | HACD2     | 1.443181818 |
| TTC93         | 4.73E-12 | 0.1776372 | 0.208 | 0.161 | 1.14E-07 | 2.4 | TTC9      | 1.291925466 |
| PI4KA         | 5.09E-12 | 0.1578724 | 0.159 | 0.116 | 1.23E-07 | 2.4 | PI4KA     | 1.370689655 |
| LINC005043    | 5.14E-12 | 0.1371794 | 0.124 | 0.085 | 1.24E-07 | 2.4 | LINC00504 | 1.458823529 |
| ABI21         | 5.16E-12 | 0.1794674 | 0.231 | 0.182 | 1.25E-07 | 2.4 | ABI2      | 1.269230769 |
| TRIQK1        | 5.48E-12 | 0.1021821 | 0.113 | 0.076 | 1.32E-07 | 2.4 | TRIQK     | 1.486842105 |
| AVL92         | 5.49E-12 | 0.1848461 | 0.244 | 0.195 | 1.32E-07 | 2.4 | AVL9      | 1.251282051 |
| WDR201        | 5.56E-12 | 0.1394474 | 0.15  | 0.108 | 1.34E-07 | 2.4 | WDR20     | 1.388888889 |
| MYH93         | 5.81E-12 | 0.1553247 | 0.561 | 0.509 | 1.40E-07 | 2.4 | MYH9      | 1.1021611   |
| STAU11        | 7.01E-12 | 0.1573917 | 0.284 | 0.229 | 1.69E-07 | 2.4 | STAU1     | 1.240174672 |
| SHOC22        | 7.81E-12 | 0.1875515 | 0.304 | 0.254 | 1.88E-07 | 2.4 | SHOC2     | 1.196850394 |
| GTF2H2C2      | 7.86E-12 | 0.1729399 | 0.106 | 0.072 | 1.90E-07 | 2.4 | GTF2H2C   | 1.472222222 |
| MYCBP21       | 7.99E-12 | 0.1547458 | 0.28  | 0.228 | 1.93E-07 | 2.4 | MYCBP2    | 1.228070175 |
| CA121         | 8.02E-12 | 0.1358509 | 0.353 | 0.289 | 1.93E-07 | 2.4 | CA12      | 1.221453287 |
| AP3S11        | 8.32E-12 | 0.1570762 | 0.147 | 0.106 | 2.01E-07 | 2.4 | AP3S1     | 1.386792453 |
| CORO2A        | 8.49E-12 | 0.1110488 | 0.09  | 0.058 | 2.05E-07 | 2.4 | CORO2A    | 1.551724138 |
| CUL32         | 8.54E-12 | 0.1321316 | 0.457 | 0.396 | 2.06E-07 | 2.4 | CUL3      | 1.154040404 |
| FAM83E        | 9.18E-12 | 0.1007161 | 0.044 | 0.023 | 2.21E-07 | 2.4 | FAM83E    | 1.913043478 |
| CPEB42        | 9.59E-12 | 0.1484303 | 0.311 | 0.254 | 2.31E-07 | 2.4 | CPEB4     | 1.224409449 |
| IMMP1L2       | 9.81E-12 | 0.1634002 | 0.178 | 0.134 | 2.37E-07 | 2.4 | IMMP1L    | 1.328358209 |
| SLC3A2        | 1.14E-11 | 0.1213707 | 0.09  | 0.058 | 2.74E-07 | 2.4 | SLC3A2    | 1.551724138 |
| PAK21         | 1.14E-11 | 0.156125  | 0.234 | 0.185 | 2.75E-07 | 2.4 | PAK2      | 1.264864865 |
| RORA1         | 1.16E-11 | 0.405714  | 0.608 | 0.569 | 2.81E-07 | 2.4 | RORA      | 1.068541301 |
| MYLIP2        | 1.22E-11 | 0.1191277 | 0.127 | 0.087 | 2.94E-07 | 2.4 | MYLIP     | 1.459770115 |
| VWDE1         | 1.22E-11 | 0.1037337 | 0.051 | 0.028 | 2.95E-07 | 2.4 | VWDE      | 1.821428571 |
| SNAP29        | 1.27E-11 | 0.11741   | 0.069 | 0.041 | 3.05E-07 | 2.4 | SNAP29    | 1.682926829 |
| ODF2L1        | 1.48E-11 | 0.2020276 | 0.197 | 0.153 | 3.56E-07 | 2.4 | ODF2L     | 1.287581699 |
| RTN32         | 1.69E-11 | 0.1763778 | 0.255 | 0.206 | 4.08E-07 | 2.4 | RTN3      | 1.237864078 |
| CERS21        | 1.76E-11 | 0.1105089 | 0.084 | 0.054 | 4.24E-07 | 2.4 | CERS2     | 1.555555556 |
| PTMA          | 1.95E-11 | 0.2596942 | 0.646 | 0.618 | 4.69E-07 | 2.4 | PTMA      | 1.045307443 |
| FBXO211       | 1.95E-11 | 0.1571264 | 0.141 | 0.102 | 4.71E-07 | 2.4 | FBXO21    | 1.382352941 |
| JAK12         | 2.03E-11 | 0.1294622 | 0.459 | 0.4   | 4.90E-07 | 2.4 | JAK1      | 1.1475      |
| DHX153        | 2.38E-11 | 0.1509194 | 0.307 | 0.255 | 5.75E-07 | 2.4 | DHX15     | 1.203921569 |
| PGRMC13       | 2.60E-11 | 0.1287774 | 0.117 | 0.081 | 6.26E-07 | 2.4 | PGRMC1    | 1.444444444 |
| HERPUD2       | 2.61E-11 | 0.125244  | 0.094 | 0.062 | 6.30E-07 | 2.4 | HERPUD2   | 1.516129032 |
| KCNE41        | 2.74E-11 | 0.1080804 | 0.051 | 0.028 | 6.61E-07 | 2.4 | KCNE4     | 1.821428571 |
| RAP1GDS12     | 2.77E-11 | 0.1658564 | 0.163 | 0.121 | 6.67E-07 | 2.4 | RAP1GDS1  | 1.347107438 |
| CLASP21       | 2.90E-11 | 0.1893399 | 0.319 | 0.267 | 7.00E-07 | 2.4 | CLASP2    | 1.194756554 |
| LINC002903    | 3.06E-11 | 0.1037831 | 0.05  | 0.027 | 7.37E-07 | 2.4 | LINC00290 | 1.851851852 |
| BNIP2         | 3.11E-11 | 0.1453087 | 0.165 | 0.123 | 7.51E-07 | 2.4 | BNIP2     | 1.341463415 |
| FGFR12        | 3.21E-11 | 0.1513539 | 0.239 | 0.187 | 7.74E-07 | 2.4 | FGFR1     | 1.278074866 |
| GRHL11        | 3.24E-11 | 0.2341652 | 0.312 | 0.261 | 7.80E-07 | 2.4 | GRHL1     | 1.195402299 |
| CAPN22        | 3.83E-11 | 0.155641  | 0.34  | 0.286 | 9.23E-07 | 2.4 | CAPN2     | 1.188811189 |
| APPL2         | 3.84E-11 | 0.1377039 | 0.144 | 0.105 | 9.25E-07 | 2.4 | APPL2     | 1.371428571 |

|                |          |           |       |       |          |     |           |             |
|----------------|----------|-----------|-------|-------|----------|-----|-----------|-------------|
| ZNF2811        | 3.91E-11 | 0.1592272 | 0.152 | 0.112 | 9.44E-07 | 2.4 | ZNF281    | 1.357142857 |
| PDPK1          | 3.97E-11 | 0.1135026 | 0.091 | 0.059 | 9.56E-07 | 2.4 | PDPK1     | 1.542372881 |
| KRAS1          | 5.05E-11 | 0.15674   | 0.192 | 0.147 | 1.22E-06 | 2.4 | KRAS      | 1.306122449 |
| ZFC3H12        | 5.49E-11 | 0.1357338 | 0.308 | 0.252 | 1.32E-06 | 2.4 | ZFC3H1    | 1.222222222 |
| MTUS12         | 5.54E-11 | 0.1508754 | 0.425 | 0.371 | 1.34E-06 | 2.4 | MTUS1     | 1.145552561 |
| CEBPG          | 5.55E-11 | 0.1002056 | 0.071 | 0.044 | 1.34E-06 | 2.4 | CEBPG     | 1.613636364 |
| ASAH13         | 5.97E-11 | 0.1101226 | 0.136 | 0.097 | 1.44E-06 | 2.4 | ASAH1     | 1.402061856 |
| GEM            | 5.99E-11 | 0.1241449 | 0.075 | 0.047 | 1.44E-06 | 2.4 | GEM       | 1.595744681 |
| MALRD13        | 6.51E-11 | 0.1378901 | 0.069 | 0.042 | 1.57E-06 | 2.4 | MALRD1    | 1.642857143 |
| AC010149.42    | 6.65E-11 | 0.118073  | 0.09  | 0.059 | 1.60E-06 | 2.4 | AC010149. | 1.525423729 |
| DNAH53         | 6.76E-11 | 0.1101673 | 0.097 | 0.064 | 1.63E-06 | 2.4 | DNAH5     | 1.515625    |
| SH3BGRL31      | 6.86E-11 | 0.2060368 | 0.083 | 0.053 | 1.65E-06 | 2.4 | SH3BGRL3  | 1.566037736 |
| C2orf69        | 6.92E-11 | 0.1013058 | 0.077 | 0.048 | 1.67E-06 | 2.4 | C2orf69   | 1.604166667 |
| CDC424         | 7.41E-11 | 0.1668262 | 0.741 | 0.713 | 1.79E-06 | 2.4 | CDC42     | 1.039270687 |
| STC2           | 7.44E-11 | 0.2099372 | 0.129 | 0.092 | 1.79E-06 | 2.4 | STC2      | 1.402173913 |
| CTTN1          | 7.57E-11 | 0.1837352 | 0.226 | 0.181 | 1.83E-06 | 2.4 | CTTN      | 1.248618785 |
| GNG12-AS1      | 7.94E-11 | 0.1134013 | 0.11  | 0.075 | 1.91E-06 | 2.4 | GNG12-AS1 | 1.466666667 |
| CCDC64         | 8.09E-11 | 0.1154729 | 0.081 | 0.052 | 1.95E-06 | 2.4 | CCDC64    | 1.557692308 |
| BLOC1S5-TXNDC5 | 8.80E-11 | 0.1142676 | 0.032 | 0.015 | 2.12E-06 | 2.4 | BLOC1S5-T | 2.133333333 |
| ATP6AP11       | 8.97E-11 | 0.1021251 | 0.08  | 0.051 | 2.16E-06 | 2.4 | ATP6AP1   | 1.568627451 |
| NFE2L1         | 9.10E-11 | 0.1295823 | 0.123 | 0.087 | 2.19E-06 | 2.4 | NFE2L1    | 1.413793103 |
| BOD1L11        | 9.11E-11 | 0.1591372 | 0.179 | 0.137 | 2.20E-06 | 2.4 | BOD1L1    | 1.306569343 |
| CDC42BPB1      | 9.41E-11 | 0.1287079 | 0.101 | 0.069 | 2.27E-06 | 2.4 | CDC42BPB  | 1.463768116 |
| TPRG12         | 9.64E-11 | 0.1642926 | 0.153 | 0.113 | 2.33E-06 | 2.4 | TPRG1     | 1.353982301 |
| SEZ6L2         | 9.86E-11 | 0.1040279 | 0.083 | 0.053 | 2.38E-06 | 2.4 | SEZ6L2    | 1.566037736 |
| STAM2          | 1.08E-10 | 0.1380078 | 0.119 | 0.084 | 2.60E-06 | 2.4 | STAM2     | 1.416666667 |
| PPP2R5A2       | 1.15E-10 | 0.173781  | 0.198 | 0.155 | 2.78E-06 | 2.4 | PPP2R5A   | 1.277419355 |
| STXBP41        | 1.23E-10 | 0.1302086 | 0.068 | 0.042 | 2.97E-06 | 2.4 | STXBP4    | 1.619047619 |
| VDAC2          | 1.43E-10 | 0.1642188 | 0.167 | 0.126 | 3.44E-06 | 2.4 | VDAC2     | 1.325396825 |
| RSRC11         | 1.45E-10 | 0.1801476 | 0.33  | 0.281 | 3.50E-06 | 2.4 | RSRC1     | 1.174377224 |
| CD2AP4         | 1.47E-10 | 0.1148244 | 0.478 | 0.421 | 3.55E-06 | 2.4 | CD2AP     | 1.135391924 |
| APMAP          | 1.50E-10 | 0.1098292 | 0.079 | 0.05  | 3.61E-06 | 2.4 | APMAP     | 1.58        |
| ATP9A          | 1.61E-10 | 0.1575284 | 0.14  | 0.102 | 3.87E-06 | 2.4 | ATP9A     | 1.37254902  |
| APLF1          | 1.62E-10 | 0.1540587 | 0.139 | 0.102 | 3.91E-06 | 2.4 | APLF      | 1.362745098 |
| BLCAP          | 1.66E-10 | 0.1167496 | 0.076 | 0.048 | 4.01E-06 | 2.4 | BLCAP     | 1.583333333 |
| MOB1B1         | 1.67E-10 | 0.1323663 | 0.093 | 0.062 | 4.03E-06 | 2.4 | MOB1B     | 1.5         |
| DHRS71         | 1.70E-10 | 0.1329859 | 0.123 | 0.087 | 4.11E-06 | 2.4 | DHRS7     | 1.413793103 |
| AGO22          | 1.76E-10 | 0.1448866 | 0.255 | 0.205 | 4.23E-06 | 2.4 | AGO2      | 1.243902439 |
| RALBP1         | 1.85E-10 | 0.1371257 | 0.145 | 0.107 | 4.47E-06 | 2.4 | RALBP1    | 1.355140187 |
| STX33          | 1.91E-10 | 0.1438588 | 0.177 | 0.135 | 4.61E-06 | 2.4 | STX3      | 1.311111111 |
| DDX171         | 1.92E-10 | 0.1461216 | 0.471 | 0.42  | 4.62E-06 | 2.4 | DDX17     | 1.121428571 |
| CDK81          | 1.93E-10 | 0.1671849 | 0.286 | 0.235 | 4.66E-06 | 2.4 | CDK8      | 1.217021277 |
| KRT171         | 2.00E-10 | 0.1456983 | 0.044 | 0.024 | 4.81E-06 | 2.4 | KRT17     | 1.833333333 |
| CBFA2T2        | 2.09E-10 | 0.1816306 | 0.206 | 0.163 | 5.04E-06 | 2.4 | CBFA2T2   | 1.263803681 |
| KLF101         | 2.49E-10 | 0.1375244 | 0.181 | 0.138 | 6.00E-06 | 2.4 | KLF10     | 1.311594203 |
| FAM83F         | 2.66E-10 | 0.1056581 | 0.062 | 0.037 | 6.40E-06 | 2.4 | FAM83F    | 1.675675676 |
| SRSF4          | 2.68E-10 | 0.1707529 | 0.338 | 0.288 | 6.46E-06 | 2.4 | SRSF4     | 1.173611111 |
| AMOT           | 2.77E-10 | 0.1114791 | 0.113 | 0.079 | 6.67E-06 | 2.4 | AMOT      | 1.430379747 |
| TET3           | 2.96E-10 | 0.1300955 | 0.165 | 0.124 | 7.14E-06 | 2.4 | TET3      | 1.330645161 |
| TOP13          | 3.00E-10 | 0.1045939 | 0.498 | 0.439 | 7.24E-06 | 2.4 | TOP1      | 1.134396355 |
| PCM12          | 3.10E-10 | 0.1773383 | 0.3   | 0.253 | 7.48E-06 | 2.4 | PCM1      | 1.185770751 |
| TBC1D52        | 3.17E-10 | 0.1736811 | 0.397 | 0.347 | 7.64E-06 | 2.4 | TBC1D5    | 1.144092219 |

|                |          |           |       |       |          |     |           |             |
|----------------|----------|-----------|-------|-------|----------|-----|-----------|-------------|
| SLC44A1        | 3.19E-10 | 0.1817098 | 0.182 | 0.14  | 7.69E-06 | 2.4 | SLC44A1   | 1.3         |
| ITGB12         | 3.32E-10 | 0.1180175 | 0.384 | 0.33  | 8.01E-06 | 2.4 | ITGB1     | 1.163636364 |
| NDUF61         | 3.46E-10 | 0.136376  | 0.135 | 0.098 | 8.34E-06 | 2.4 | NDUF61    | 1.37755102  |
| MAP7D12        | 3.52E-10 | 0.1369904 | 0.191 | 0.148 | 8.49E-06 | 2.4 | MAP7D1    | 1.290540541 |
| P2RX4          | 3.62E-10 | 0.1216139 | 0.109 | 0.076 | 8.73E-06 | 2.4 | P2RX4     | 1.434210526 |
| ARHGAP35       | 3.91E-10 | 0.1440897 | 0.118 | 0.084 | 9.44E-06 | 2.4 | ARHGAP35  | 1.404761905 |
| AC018816.33    | 4.27E-10 | 0.1145366 | 0.132 | 0.094 | 1.03E-05 | 2.4 | AC018816. | 1.404255319 |
| SLC9C12        | 4.28E-10 | 0.1131022 | 0.083 | 0.054 | 1.03E-05 | 2.4 | SLC9C1    | 1.537037037 |
| ZNF2542        | 4.41E-10 | 0.1756248 | 0.197 | 0.157 | 1.06E-05 | 2.4 | ZNF254    | 1.25477707  |
| ZNF6381        | 4.88E-10 | 0.1637131 | 0.484 | 0.438 | 1.18E-05 | 2.4 | ZNF638    | 1.105022831 |
| PVRL41         | 4.99E-10 | 0.1555044 | 0.231 | 0.187 | 1.20E-05 | 2.4 | PVRL4     | 1.235294118 |
| PBRM12         | 5.01E-10 | 0.1756634 | 0.265 | 0.22  | 1.21E-05 | 2.4 | PBRM1     | 1.204545455 |
| PUM23          | 5.06E-10 | 0.1186644 | 0.463 | 0.407 | 1.22E-05 | 2.4 | PUM2      | 1.137592138 |
| MT-ND62        | 5.45E-10 | 0.1957281 | 0.214 | 0.174 | 1.31E-05 | 2.4 | MT-ND6    | 1.229885057 |
| CA24           | 5.49E-10 | 0.124966  | 0.123 | 0.087 | 1.32E-05 | 2.4 | CA2       | 1.413793103 |
| PAIP21         | 5.79E-10 | 0.1635431 | 0.197 | 0.155 | 1.40E-05 | 2.4 | PAIP2     | 1.270967742 |
| SUMO21         | 6.32E-10 | 0.162289  | 0.14  | 0.105 | 1.52E-05 | 2.4 | SUMO2     | 1.333333333 |
| SERINC51       | 6.37E-10 | 0.1513949 | 0.285 | 0.239 | 1.54E-05 | 2.4 | SERINC5   | 1.192468619 |
| CREM1          | 7.00E-10 | 0.1278836 | 0.132 | 0.096 | 1.69E-05 | 2.4 | CREM      | 1.375       |
| PLEKHF21       | 7.18E-10 | 0.1289    | 0.134 | 0.097 | 1.73E-05 | 2.4 | PLEKHF2   | 1.381443299 |
| IQGAP12        | 7.44E-10 | 0.1531033 | 0.48  | 0.432 | 1.79E-05 | 2.4 | IQGAP1    | 1.111111111 |
| AGPAT3         | 7.64E-10 | 0.1519929 | 0.119 | 0.085 | 1.84E-05 | 2.4 | AGPAT3    | 1.4         |
| EIF2S22        | 7.66E-10 | 0.2087757 | 0.298 | 0.255 | 1.85E-05 | 2.4 | EIF2S2    | 1.168627451 |
| RSF11          | 7.75E-10 | 0.1492799 | 0.415 | 0.369 | 1.87E-05 | 2.4 | RSF1      | 1.124661247 |
| DYNC1H11       | 8.18E-10 | 0.1789689 | 0.222 | 0.179 | 1.97E-05 | 2.4 | DYNC1H1   | 1.240223464 |
| WWC32          | 8.21E-10 | 0.1078388 | 0.107 | 0.075 | 1.98E-05 | 2.4 | WWC3      | 1.426666667 |
| SERPINB15      | 9.33E-10 | 0.1096417 | 0.139 | 0.102 | 2.25E-05 | 2.4 | SERPINB1  | 1.362745098 |
| IRF62          | 9.42E-10 | 0.1362053 | 0.274 | 0.227 | 2.27E-05 | 2.4 | IRF6      | 1.207048458 |
| TMEM1563       | 9.95E-10 | 0.1724952 | 0.074 | 0.047 | 2.40E-05 | 2.4 | TMEM156   | 1.574468085 |
| BARD11         | 1.08E-09 | 0.1425986 | 0.121 | 0.088 | 2.60E-05 | 2.4 | BARD1     | 1.375       |
| HIST1H2BB2     | 1.10E-09 | 0.1065202 | 0.208 | 0.164 | 2.65E-05 | 2.4 | HIST1H2BB | 1.268292683 |
| MAFB2          | 1.13E-09 | 0.1116513 | 0.072 | 0.046 | 2.73E-05 | 2.4 | MAFB      | 1.565217391 |
| HAVCR2         | 1.14E-09 | 0.1051273 | 0.058 | 0.035 | 2.76E-05 | 2.4 | HAVCR2    | 1.657142857 |
| RP11-123O10.42 | 1.25E-09 | 0.1825017 | 0.251 | 0.207 | 3.00E-05 | 2.4 | RP11-123O | 1.212560386 |
| RP11-701H24.9  | 1.26E-09 | 0.1173624 | 0.097 | 0.067 | 3.04E-05 | 2.4 | RP11-701H | 1.447761194 |
| MYO5A2         | 1.29E-09 | 0.1301064 | 0.139 | 0.103 | 3.10E-05 | 2.4 | MYO5A     | 1.349514563 |
| GAB22          | 1.31E-09 | 0.1534672 | 0.238 | 0.194 | 3.16E-05 | 2.4 | GAB2      | 1.226804124 |
| PPP3CB1        | 1.36E-09 | 0.1305771 | 0.134 | 0.099 | 3.29E-05 | 2.4 | PPP3CB    | 1.353535354 |
| CAPNS1         | 1.57E-09 | 0.1301827 | 0.109 | 0.077 | 3.78E-05 | 2.4 | CAPNS1    | 1.415584416 |
| SREBF22        | 1.60E-09 | 0.2090152 | 0.414 | 0.373 | 3.87E-05 | 2.4 | SREBF2    | 1.109919571 |
| SPATA6L1       | 1.75E-09 | 0.124526  | 0.087 | 0.059 | 4.22E-05 | 2.4 | SPATA6L   | 1.474576271 |
| CELSR1         | 1.80E-09 | 0.1170954 | 0.077 | 0.05  | 4.34E-05 | 2.4 | CELSR1    | 1.54        |
| ABCD33         | 1.81E-09 | 0.1032734 | 0.221 | 0.174 | 4.37E-05 | 2.4 | ABCD3     | 1.270114943 |
| MCUR11         | 1.85E-09 | 0.1126787 | 0.086 | 0.058 | 4.46E-05 | 2.4 | MCUR1     | 1.482758621 |
| HSBP12         | 1.89E-09 | 0.1628888 | 0.591 | 0.55  | 4.56E-05 | 2.4 | HSBP1     | 1.074545455 |
| SLC39A1        | 1.90E-09 | 0.106607  | 0.136 | 0.1   | 4.59E-05 | 2.4 | SLC39A1   | 1.36        |
| NRDC           | 1.91E-09 | 0.1595071 | 0.253 | 0.209 | 4.61E-05 | 2.4 | NRDC      | 1.210526316 |
| TAOK12         | 1.99E-09 | 0.1562615 | 0.289 | 0.244 | 4.80E-05 | 2.4 | TAOK1     | 1.18442623  |
| PLEKHB23       | 2.04E-09 | 0.1035504 | 0.203 | 0.158 | 4.92E-05 | 2.4 | PLEKHB2   | 1.284810127 |
| USP9X3         | 2.12E-09 | 0.114242  | 0.453 | 0.399 | 5.12E-05 | 2.4 | USP9X     | 1.135338346 |
| ARPC51         | 2.51E-09 | 0.1488082 | 0.141 | 0.106 | 6.05E-05 | 2.4 | ARPC5     | 1.330188679 |
| ZNF487         | 2.53E-09 | 0.1051548 | 0.08  | 0.053 | 6.10E-05 | 2.4 | ZNF487    | 1.509433962 |

|               |          |           |       |       |             |     |            |             |
|---------------|----------|-----------|-------|-------|-------------|-----|------------|-------------|
| C6orf1061     | 2.57E-09 | 0.1524404 | 0.19  | 0.15  | 6.19E-05    | 2.4 | C6orf106   | 1.266666667 |
| ZNF800        | 2.58E-09 | 0.1318949 | 0.139 | 0.104 | 6.22E-05    | 2.4 | ZNF800     | 1.336538462 |
| NFRKB1        | 2.65E-09 | 0.1182888 | 0.111 | 0.079 | 6.39E-05    | 2.4 | NFRKB      | 1.405063291 |
| ZBTB183       | 3.00E-09 | 0.1001007 | 0.1   | 0.069 | 7.25E-05    | 2.4 | ZBTB18     | 1.449275362 |
| ZNF516        | 3.03E-09 | 0.1251462 | 0.12  | 0.087 | 7.32E-05    | 2.4 | ZNF516     | 1.379310345 |
| SGPP1         | 3.29E-09 | 0.1359523 | 0.109 | 0.078 | 7.94E-05    | 2.4 | SGPP1      | 1.397435897 |
| HNRNPU-AS12   | 3.30E-09 | 0.127143  | 0.123 | 0.09  | 7.95E-05    | 2.4 | HNRNPU-A   | 1.366666667 |
| SLTM          | 3.52E-09 | 0.1441221 | 0.335 | 0.29  | 8.50E-05    | 2.4 | SLTM       | 1.155172414 |
| KIF16B2       | 3.69E-09 | 0.1163272 | 0.226 | 0.181 | 8.90E-05    | 2.4 | KIF16B     | 1.248618785 |
| SBNO11        | 3.69E-09 | 0.1293731 | 0.187 | 0.147 | 8.90E-05    | 2.4 | SBNO1      | 1.272108844 |
| ATXN21        | 3.99E-09 | 0.1452306 | 0.378 | 0.329 | 9.61E-05    | 2.4 | ATXN2      | 1.14893617  |
| ZNF4313       | 4.18E-09 | 0.1605227 | 0.161 | 0.125 | 0.000100909 | 2.4 | ZNF431     | 1.288       |
| DDX54         | 4.28E-09 | 0.1439164 | 0.537 | 0.493 | 0.000103165 | 2.4 | DDX5       | 1.089249493 |
| ZNF24         | 4.58E-09 | 0.1525784 | 0.303 | 0.259 | 0.000110437 | 2.4 | ZNF24      | 1.16988417  |
| DNAH111       | 4.65E-09 | 0.1216875 | 0.072 | 0.047 | 0.000112068 | 2.4 | DNAH11     | 1.531914894 |
| DNM1L2        | 4.73E-09 | 0.1233493 | 0.151 | 0.115 | 0.000114129 | 2.4 | DNM1L      | 1.313043478 |
| KLF71         | 5.12E-09 | 0.1280286 | 0.159 | 0.122 | 0.000123564 | 2.4 | KLF7       | 1.303278689 |
| IST11         | 5.39E-09 | 0.1250725 | 0.373 | 0.325 | 0.000130034 | 2.4 | IST1       | 1.147692308 |
| SH3RF11       | 5.49E-09 | 0.1821479 | 0.262 | 0.219 | 0.000132362 | 2.4 | SH3RF1     | 1.196347032 |
| WDR442        | 5.59E-09 | 0.1224478 | 0.201 | 0.159 | 0.000134756 | 2.4 | WDR44      | 1.264150943 |
| EPC21         | 5.76E-09 | 0.1154176 | 0.097 | 0.068 | 0.00013885  | 2.4 | EPC2       | 1.426470588 |
| CSGALNACT21   | 6.01E-09 | 0.1056055 | 0.16  | 0.122 | 0.00014483  | 2.4 | CSGALNAC   | 1.31147541  |
| MROH1         | 6.23E-09 | 0.1138086 | 0.091 | 0.063 | 0.000150167 | 2.4 | MROH1      | 1.444444444 |
| CUEDC11       | 6.30E-09 | 0.1397453 | 0.092 | 0.064 | 0.000151892 | 2.4 | CUEDC1     | 1.4375      |
| RAB6A1        | 6.91E-09 | 0.154302  | 0.344 | 0.301 | 0.000166614 | 2.4 | RAB6A      | 1.142857143 |
| ACOT91        | 7.00E-09 | 0.1100172 | 0.122 | 0.089 | 0.000168873 | 2.4 | ACOT9      | 1.370786517 |
| MSRA1         | 7.21E-09 | 0.1576845 | 0.111 | 0.08  | 0.000173757 | 2.4 | MSRA       | 1.3875      |
| SDCBP2-AS12   | 7.33E-09 | 0.1381091 | 0.09  | 0.062 | 0.00017679  | 2.4 | SDCBP2-AS  | 1.451612903 |
| EFR3A1        | 7.34E-09 | 0.1126035 | 0.249 | 0.204 | 0.000177044 | 2.4 | EFR3A      | 1.220588235 |
| KLHL18        | 7.97E-09 | 0.1147906 | 0.107 | 0.076 | 0.000192136 | 2.4 | KLHL18     | 1.407894737 |
| ATL31         | 8.49E-09 | 0.1326458 | 0.156 | 0.121 | 0.000204602 | 2.4 | ATL3       | 1.289256198 |
| RREB12        | 8.50E-09 | 0.210043  | 0.3   | 0.26  | 0.000205016 | 2.4 | RREB1      | 1.153846154 |
| ABHD15-AS1    | 8.88E-09 | 0.1018373 | 0.059 | 0.037 | 0.00021418  | 2.4 | ABHD15-A   | 1.594594595 |
| ANXA111       | 9.18E-09 | 0.1250618 | 0.283 | 0.237 | 0.000221369 | 2.4 | ANXA11     | 1.194092827 |
| DDX581        | 9.67E-09 | 0.1167838 | 0.124 | 0.092 | 0.000233081 | 2.4 | DDX58      | 1.347826087 |
| PAFAH1B23     | 9.88E-09 | 0.1250494 | 0.306 | 0.259 | 0.000238137 | 2.4 | PAFAH1B2   | 1.181467181 |
| NDUFA61       | 1.01E-08 | 0.1297978 | 0.111 | 0.081 | 0.000242881 | 2.4 | NDUFA6     | 1.37037037  |
| RYR21         | 1.02E-08 | 0.1292191 | 0.151 | 0.114 | 0.000245784 | 2.4 | RYR2       | 1.324561404 |
| PRMT22        | 1.05E-08 | 0.1378549 | 0.163 | 0.127 | 0.000253581 | 2.4 | PRMT2      | 1.283464567 |
| HMBOX11       | 1.06E-08 | 0.1705395 | 0.27  | 0.228 | 0.00025562  | 2.4 | HMBOX1     | 1.184210526 |
| RP1-313I6.122 | 1.07E-08 | 0.1097519 | 0.126 | 0.093 | 0.000258484 | 2.4 | RP1-313I6. | 1.35483871  |
| UBR41         | 1.09E-08 | 0.1040431 | 0.273 | 0.225 | 0.000263485 | 2.4 | UBR4       | 1.213333333 |
| KIAA18411     | 1.11E-08 | 0.1049961 | 0.066 | 0.043 | 0.000268011 | 2.4 | KIAA1841   | 1.534883721 |
| R3HCC1L2      | 1.14E-08 | 0.136283  | 0.162 | 0.126 | 0.000274528 | 2.4 | R3HCC1L    | 1.285714286 |
| SOX91         | 1.29E-08 | 0.1746808 | 0.226 | 0.187 | 0.00031058  | 2.4 | SOX9       | 1.20855615  |
| NCOR2         | 1.29E-08 | 0.114387  | 0.098 | 0.069 | 0.000311579 | 2.4 | NCOR2      | 1.420289855 |
| RP11-347C12.1 | 1.31E-08 | 0.1078204 | 0.066 | 0.043 | 0.000315419 | 2.4 | RP11-347C  | 1.534883721 |
| SRPX2         | 1.32E-08 | 0.1278654 | 0.099 | 0.07  | 0.000317222 | 2.4 | SRPX2      | 1.414285714 |
| SIAH1         | 1.47E-08 | 0.1152512 | 0.146 | 0.111 | 0.000354506 | 2.4 | SIAH1      | 1.315315315 |
| RMND5A2       | 1.49E-08 | 0.1105045 | 0.134 | 0.101 | 0.000358149 | 2.4 | RMND5A     | 1.326732673 |
| POLR2A1       | 1.52E-08 | 0.102773  | 0.203 | 0.162 | 0.00036743  | 2.4 | POLR2A     | 1.25308642  |
| PLAT3         | 1.54E-08 | 0.1142504 | 0.116 | 0.084 | 0.000371867 | 2.4 | PLAT       | 1.380952381 |

|               |          |           |       |       |             |     |            |             |
|---------------|----------|-----------|-------|-------|-------------|-----|------------|-------------|
| RP11-624L4.11 | 1.59E-08 | 0.1448137 | 0.088 | 0.061 | 0.000384281 | 2.4 | RP11-624L4 | 1.442622951 |
| UBE2Q2        | 1.77E-08 | 0.1274974 | 0.112 | 0.082 | 0.000426411 | 2.4 | UBE2Q2     | 1.365853659 |
| ANKRD111      | 1.81E-08 | 0.1038142 | 0.364 | 0.315 | 0.000436185 | 2.4 | ANKRD11    | 1.155555556 |
| ZNF611        | 1.82E-08 | 0.1325763 | 0.084 | 0.058 | 0.000438313 | 2.4 | ZNF611     | 1.448275862 |
| TROVE2        | 1.94E-08 | 0.1191257 | 0.169 | 0.132 | 0.000467145 | 2.4 | TROVE2     | 1.28030303  |
| SAP1301       | 1.95E-08 | 0.1080472 | 0.114 | 0.083 | 0.000469735 | 2.4 | SAP130     | 1.373493976 |
| BRD22         | 1.99E-08 | 0.1447489 | 0.307 | 0.265 | 0.000479661 | 2.4 | BRD2       | 1.158490566 |
| RP11-238K6.12 | 2.01E-08 | 0.1111588 | 0.155 | 0.118 | 0.00048568  | 2.4 | RP11-238K  | 1.313559322 |
| CAP21         | 2.10E-08 | 0.1378579 | 0.153 | 0.119 | 0.000505359 | 2.4 | CAP2       | 1.285714286 |
| SPTBN1        | 2.13E-08 | 0.1579978 | 0.255 | 0.215 | 0.000513424 | 2.4 | SPTBN1     | 1.186046512 |
| RAB7A2        | 2.16E-08 | 0.1100429 | 0.495 | 0.446 | 0.000520088 | 2.4 | RAB7A      | 1.109865471 |
| USP473        | 2.17E-08 | 0.1010826 | 0.465 | 0.416 | 0.00052348  | 2.4 | USP47      | 1.117788462 |
| KMT2E3        | 2.18E-08 | 0.1644069 | 0.501 | 0.461 | 0.000524964 | 2.4 | KMT2E      | 1.086767896 |
| PKP21         | 2.26E-08 | 0.1090881 | 0.123 | 0.091 | 0.000544869 | 2.4 | PKP2       | 1.351648352 |
| SDF2          | 2.33E-08 | 0.1098714 | 0.151 | 0.117 | 0.00056091  | 2.4 | SDF2       | 1.290598291 |
| MAP3K91       | 2.36E-08 | 0.1597948 | 0.196 | 0.16  | 0.000569813 | 2.4 | MAP3K9     | 1.225       |
| WDFY31        | 2.42E-08 | 0.1514793 | 0.29  | 0.25  | 0.000583537 | 2.4 | WDFY3      | 1.16        |
| PPP2R3C       | 2.44E-08 | 0.1317775 | 0.137 | 0.105 | 0.000589516 | 2.4 | PPP2R3C    | 1.304761905 |
| SERINC2       | 2.93E-08 | 0.1155853 | 0.129 | 0.097 | 0.000707668 | 2.4 | SERINC2    | 1.329896907 |
| CCDC1261      | 3.02E-08 | 0.1179267 | 0.099 | 0.071 | 0.000729054 | 2.4 | CCDC126    | 1.394366197 |
| CHMP2A1       | 3.26E-08 | 0.111735  | 0.119 | 0.088 | 0.000786461 | 2.4 | CHMP2A     | 1.352272727 |
| VTCN12        | 3.30E-08 | 0.1141387 | 0.139 | 0.105 | 0.00079552  | 2.4 | VTCN1      | 1.323809524 |
| CD61          | 3.32E-08 | 0.1505829 | 0.019 | 0.008 | 0.000801063 | 2.4 | CD6        | 2.375       |
| MSMO13        | 3.51E-08 | 0.2797199 | 0.366 | 0.33  | 0.000847462 | 2.4 | MSMO1      | 1.109090909 |
| CLOCK1        | 3.71E-08 | 0.1289337 | 0.245 | 0.203 | 0.000895729 | 2.4 | CLOCK      | 1.206896552 |
| DENND1B1      | 3.76E-08 | 0.1436222 | 0.179 | 0.143 | 0.0009068   | 2.4 | DENND1B    | 1.251748252 |
| TAF8          | 3.80E-08 | 0.105316  | 0.09  | 0.064 | 0.000915212 | 2.4 | TAF8       | 1.40625     |
| BAZ1B1        | 3.80E-08 | 0.1273809 | 0.206 | 0.168 | 0.000915726 | 2.4 | BAZ1B      | 1.226190476 |
| MOB1A1        | 3.93E-08 | 0.1290533 | 0.136 | 0.104 | 0.000947964 | 2.4 | MOB1A      | 1.307692308 |
| SPDYA2        | 4.36E-08 | 0.1136437 | 0.133 | 0.1   | 0.001050926 | 2.4 | SPDYA      | 1.33        |
| SLC6A161      | 4.36E-08 | 0.1020676 | 0.067 | 0.044 | 0.001052065 | 2.4 | SLC6A16    | 1.522727273 |
| MDGA23        | 4.38E-08 | 0.100686  | 0.095 | 0.067 | 0.001055208 | 2.4 | MDGA2      | 1.417910448 |
| ZMYM21        | 4.60E-08 | 0.1515589 | 0.4   | 0.359 | 0.001108595 | 2.4 | ZMYM2      | 1.114206128 |
| TAF3          | 4.64E-08 | 0.1122637 | 0.115 | 0.085 | 0.001119918 | 2.4 | TAF3       | 1.352941176 |
| GNG52         | 4.66E-08 | 0.1270289 | 0.149 | 0.115 | 0.001123202 | 2.4 | GNG5       | 1.295652174 |
| TLE11         | 4.68E-08 | 0.1673382 | 0.253 | 0.214 | 0.001127989 | 2.4 | TLE1       | 1.182242991 |
| REV3L         | 5.04E-08 | 0.1562135 | 0.318 | 0.275 | 0.001214493 | 2.4 | REV3L      | 1.156363636 |
| TBC1D121      | 5.21E-08 | 0.1076973 | 0.105 | 0.076 | 0.00125569  | 2.4 | TBC1D12    | 1.381578947 |
| SLC9A11       | 5.35E-08 | 0.1147031 | 0.153 | 0.118 | 0.001289053 | 2.4 | SLC9A1     | 1.296610169 |
| MTMR33        | 5.42E-08 | 0.125054  | 0.236 | 0.195 | 0.00130596  | 2.4 | MTMR3      | 1.21025641  |
| SQRDL1        | 6.01E-08 | 0.1291848 | 0.221 | 0.183 | 0.00144902  | 2.4 | SQRDL      | 1.207650273 |
| RCAN34        | 6.48E-08 | 0.1480255 | 0.225 | 0.185 | 0.001561518 | 2.4 | RCAN3      | 1.216216216 |
| CLDND12       | 6.49E-08 | 0.1198365 | 0.237 | 0.197 | 0.001565117 | 2.4 | CLDND1     | 1.203045685 |
| DNM21         | 6.62E-08 | 0.1004945 | 0.122 | 0.092 | 0.001597086 | 2.4 | DNM2       | 1.326086957 |
| BRD41         | 6.91E-08 | 0.1169838 | 0.239 | 0.198 | 0.001667087 | 2.4 | BRD4       | 1.207070707 |
| USP242        | 7.59E-08 | 0.1386807 | 0.203 | 0.166 | 0.00182945  | 2.4 | USP24      | 1.222891566 |
| RAB303        | 8.34E-08 | 0.1584348 | 0.153 | 0.118 | 0.002009924 | 2.4 | RAB30      | 1.296610169 |
| PRKAR2A2      | 8.76E-08 | 0.1490796 | 0.2   | 0.162 | 0.002111697 | 2.4 | PRKAR2A    | 1.234567901 |
| PHF112        | 8.78E-08 | 0.1345577 | 0.11  | 0.082 | 0.002116127 | 2.4 | PHF11      | 1.341463415 |
| DYNC1LI1      | 9.39E-08 | 0.1022966 | 0.098 | 0.071 | 0.002265075 | 2.4 | DYNC1LI1   | 1.38028169  |
| FOXK11        | 9.52E-08 | 0.1217135 | 0.217 | 0.179 | 0.002295294 | 2.4 | FOXK1      | 1.212290503 |
| DDX6          | 1.01E-07 | 0.128975  | 0.303 | 0.261 | 0.002437865 | 2.4 | DDX6       | 1.16091954  |



|               |          |           |       |       |             |     |           |             |
|---------------|----------|-----------|-------|-------|-------------|-----|-----------|-------------|
| ARNTL21       | 1.04E-07 | 0.13463   | 0.176 | 0.141 | 0.002510584 | 2.4 | ARNTL2    | 1.24822695  |
| RHOC          | 1.04E-07 | 0.1275305 | 0.089 | 0.063 | 0.002512433 | 2.4 | RHOC      | 1.412698413 |
| PRELID23      | 1.10E-07 | 0.1584523 | 0.094 | 0.068 | 0.00265788  | 2.4 | PRELID2   | 1.382352941 |
| ACAP21        | 1.12E-07 | 0.1435288 | 0.217 | 0.18  | 0.002707364 | 2.4 | ACAP2     | 1.205555556 |
| CYFIP11       | 1.25E-07 | 0.1091956 | 0.169 | 0.134 | 0.003006496 | 2.4 | CYFIP1    | 1.26119403  |
| DSP2          | 1.27E-07 | 0.1788504 | 0.388 | 0.351 | 0.003059162 | 2.4 | DSP       | 1.105413105 |
| ATP6V0E12     | 1.29E-07 | 0.1072782 | 0.726 | 0.689 | 0.003120634 | 2.4 | ATP6V0E1  | 1.053701016 |
| OSBPL1A3      | 1.33E-07 | 0.1338488 | 0.205 | 0.168 | 0.003200965 | 2.4 | OSBPL1A   | 1.220238095 |
| ARPC1A        | 1.34E-07 | 0.1041837 | 0.089 | 0.064 | 0.003240463 | 2.4 | ARPC1A    | 1.390625    |
| GLRX32        | 1.35E-07 | 0.1261319 | 0.152 | 0.119 | 0.003260949 | 2.4 | GLRX3     | 1.277310924 |
| MIPEP2        | 1.39E-07 | 0.1261881 | 0.077 | 0.054 | 0.003345854 | 2.4 | MIPEP     | 1.425925926 |
| NET12         | 1.47E-07 | 0.1319577 | 0.225 | 0.187 | 0.003533602 | 2.4 | NET1      | 1.203208556 |
| GNA132        | 1.47E-07 | 0.1019539 | 0.244 | 0.204 | 0.003550755 | 2.4 | GNA13     | 1.196078431 |
| NCKAP12       | 1.59E-07 | 0.1144051 | 0.471 | 0.429 | 0.003826107 | 2.4 | NCKAP1    | 1.097902098 |
| STK17B2       | 1.60E-07 | 0.1088406 | 0.192 | 0.155 | 0.003859475 | 2.4 | STK17B    | 1.238709677 |
| PAPD41        | 1.72E-07 | 0.1363095 | 0.351 | 0.308 | 0.004154169 | 2.4 | PAPD4     | 1.13961039  |
| HN11          | 1.83E-07 | 0.1151126 | 0.085 | 0.061 | 0.00441192  | 2.4 | HN1       | 1.393442623 |
| PDS5A1        | 1.89E-07 | 0.1891191 | 0.391 | 0.359 | 0.004567456 | 2.4 | PDS5A     | 1.08913649  |
| RP11-39M21.11 | 1.98E-07 | 0.1481646 | 0.082 | 0.058 | 0.004778525 | 2.4 | RP11-39M2 | 1.413793103 |
| IGF2R1        | 2.08E-07 | 0.1388272 | 0.223 | 0.186 | 0.005024952 | 2.4 | IGF2R     | 1.198924731 |
| UBE2E32       | 2.11E-07 | 0.1650751 | 0.202 | 0.167 | 0.005099868 | 2.4 | UBE2E3    | 1.209580838 |
| KIAA15512     | 2.26E-07 | 0.1370665 | 0.153 | 0.121 | 0.005459475 | 2.4 | KIAA1551  | 1.26446281  |
| TAB3          | 2.27E-07 | 0.1214914 | 0.116 | 0.088 | 0.005478347 | 2.4 | TAB3      | 1.318181818 |
| ESR22         | 2.51E-07 | 0.1322249 | 0.133 | 0.103 | 0.00605045  | 2.4 | ESR2      | 1.291262136 |
| CXCL6         | 2.56E-07 | 0.2297792 | 0.09  | 0.065 | 0.006168244 | 2.4 | CXCL6     | 1.384615385 |
| IKBKB1        | 2.61E-07 | 0.1050455 | 0.198 | 0.161 | 0.006292529 | 2.4 | IKBKB     | 1.229813665 |
| DSC22         | 2.66E-07 | 0.1250605 | 0.243 | 0.204 | 0.00642574  | 2.4 | DSC2      | 1.191176471 |
| DENND6A       | 2.75E-07 | 0.1203525 | 0.175 | 0.141 | 0.006621539 | 2.4 | DENND6A   | 1.241134752 |
| GCLC1         | 2.75E-07 | 0.11427   | 0.094 | 0.068 | 0.006631081 | 2.4 | GCLC      | 1.382352941 |
| CDKL51        | 2.77E-07 | 0.1183561 | 0.115 | 0.087 | 0.00667285  | 2.4 | CDKL5     | 1.32183908  |
| TULP31        | 2.86E-07 | 0.1499821 | 0.114 | 0.086 | 0.006900047 | 2.4 | TULP3     | 1.325581395 |
| CREB12        | 2.91E-07 | 0.1443955 | 0.221 | 0.186 | 0.007018956 | 2.4 | CREB1     | 1.188172043 |
| ZNF440        | 3.18E-07 | 0.1027165 | 0.068 | 0.047 | 0.007665389 | 2.4 | ZNF440    | 1.446808511 |
| STRN31        | 3.25E-07 | 0.1328287 | 0.353 | 0.314 | 0.007836902 | 2.4 | STRN3     | 1.124203822 |
| NKTR          | 3.30E-07 | 0.147385  | 0.354 | 0.317 | 0.007952162 | 2.4 | NKTR      | 1.116719243 |
| THOC21        | 3.77E-07 | 0.1075434 | 0.455 | 0.409 | 0.009088538 | 2.4 | THOC2     | 1.112469438 |
| LAMC22        | 3.89E-07 | 0.1216803 | 0.3   | 0.259 | 0.009371216 | 2.4 | LAMC2     | 1.158301158 |
| SERPINB61     | 3.98E-07 | 0.103379  | 0.076 | 0.053 | 0.009600278 | 2.4 | SERPINB6  | 1.433962264 |
| EP4001        | 4.00E-07 | 0.1164113 | 0.12  | 0.092 | 0.009649069 | 2.4 | EP400     | 1.304347826 |
| FDPS2         | 4.02E-07 | 0.2741613 | 0.487 | 0.45  | 0.0096902   | 2.4 | FDPS      | 1.082222222 |
| ABHD31        | 4.12E-07 | 0.1350105 | 0.206 | 0.171 | 0.00994644  | 2.4 | ABHD3     | 1.204678363 |
| PLD11         | 4.41E-07 | 0.1338519 | 0.157 | 0.126 | 0.01062374  | 2.4 | PLD1      | 1.246031746 |
| BTBD31        | 4.41E-07 | 0.1356185 | 0.143 | 0.114 | 0.01063615  | 2.4 | BTBD3     | 1.254385965 |
| KIAA0040      | 4.44E-07 | 0.1097822 | 0.105 | 0.078 | 0.01070932  | 2.4 | KIAA0040  | 1.346153846 |
| GIPC1         | 4.61E-07 | 0.1215285 | 0.16  | 0.129 | 0.0111249   | 2.4 | GIPC1     | 1.240310078 |
| ILKAP         | 4.63E-07 | 0.10116   | 0.089 | 0.065 | 0.01116683  | 2.4 | ILKAP     | 1.369230769 |
| HBP12         | 4.74E-07 | 0.1243351 | 0.297 | 0.258 | 0.01142149  | 2.4 | HBP1      | 1.151162791 |
| DDX10         | 4.74E-07 | 0.1445451 | 0.107 | 0.081 | 0.01144107  | 2.4 | DDX10     | 1.320987654 |
| ABLIM12       | 4.76E-07 | 0.1270912 | 0.305 | 0.265 | 0.01148845  | 2.4 | ABLIM1    | 1.150943396 |
| SESN21        | 5.28E-07 | 0.1390093 | 0.139 | 0.109 | 0.01271978  | 2.4 | SESN2     | 1.275229358 |
| CMC2          | 5.60E-07 | 0.108638  | 0.097 | 0.072 | 0.01350164  | 2.4 | CMC2      | 1.347222222 |
| COL4A3BP      | 5.70E-07 | 0.1252459 | 0.166 | 0.134 | 0.01375536  | 2.4 | COL4A3BP  | 1.23880597  |

|              |          |           |       |       |            |     |           |             |
|--------------|----------|-----------|-------|-------|------------|-----|-----------|-------------|
| VPS501       | 5.85E-07 | 0.123566  | 0.111 | 0.085 | 0.01409522 | 2.4 | VPS50     | 1.305882353 |
| IRS22        | 6.00E-07 | 0.1984619 | 0.351 | 0.318 | 0.01446373 | 2.4 | IRS2      | 1.103773585 |
| AHR1         | 6.37E-07 | 0.152724  | 0.235 | 0.201 | 0.01536744 | 2.4 | AHR       | 1.169154229 |
| GNS3         | 6.84E-07 | 0.1046304 | 0.117 | 0.089 | 0.01650467 | 2.4 | GNS       | 1.314606742 |
| NAPG2        | 7.02E-07 | 0.1366653 | 0.21  | 0.177 | 0.01692466 | 2.4 | NAPG      | 1.186440678 |
| C6orf621     | 7.07E-07 | 0.1045146 | 0.241 | 0.205 | 0.01705322 | 2.4 | C6orf62   | 1.175609756 |
| SPSB1        | 7.53E-07 | 0.109421  | 0.109 | 0.083 | 0.01815563 | 2.4 | SPSB1     | 1.313253012 |
| PIP5K1B      | 7.57E-07 | 0.1107888 | 0.154 | 0.122 | 0.01825958 | 2.4 | PIP5K1B   | 1.262295082 |
| DHCR242      | 7.66E-07 | 0.1397277 | 0.218 | 0.184 | 0.01847612 | 2.4 | DHCR24    | 1.184782609 |
| SLC35F51     | 7.76E-07 | 0.1170682 | 0.145 | 0.115 | 0.01871989 | 2.4 | SLC35F5   | 1.260869565 |
| LRCH31       | 7.81E-07 | 0.1232018 | 0.379 | 0.343 | 0.01884062 | 2.4 | LRCH3     | 1.104956268 |
| EPS15L1      | 7.91E-07 | 0.1116943 | 0.105 | 0.08  | 0.01907462 | 2.4 | EPS15L1   | 1.3125      |
| SIPA1L31     | 8.07E-07 | 0.1774815 | 0.245 | 0.21  | 0.01946023 | 2.4 | SIPA1L3   | 1.166666667 |
| KPNA4        | 9.44E-07 | 0.1150516 | 0.198 | 0.165 | 0.02276697 | 2.4 | KPNA4     | 1.2         |
| MTX21        | 9.57E-07 | 0.1051325 | 0.108 | 0.082 | 0.0230711  | 2.4 | MTX2      | 1.317073171 |
| PSPC11       | 9.61E-07 | 0.1455604 | 0.221 | 0.188 | 0.0231715  | 2.4 | PSPC1     | 1.175531915 |
| GNAI31       | 9.69E-07 | 0.1020355 | 0.219 | 0.182 | 0.02336491 | 2.4 | GNAI3     | 1.203296703 |
| GPCPD1       | 9.88E-07 | 0.103547  | 0.181 | 0.147 | 0.02381645 | 2.4 | GPCPD1    | 1.231292517 |
| MARS1        | 1.02E-06 | 0.1262421 | 0.175 | 0.143 | 0.02453961 | 2.4 | MARS      | 1.223776224 |
| MED151       | 1.02E-06 | 0.1568895 | 0.203 | 0.168 | 0.02467267 | 2.4 | MED15     | 1.208333333 |
| VEGFA1       | 1.10E-06 | 0.1737663 | 0.261 | 0.226 | 0.02663768 | 2.4 | VEGFA     | 1.154867257 |
| PPM1K3       | 1.11E-06 | 0.1359779 | 0.179 | 0.147 | 0.0266766  | 2.4 | PPM1K     | 1.217687075 |
| CREBRF       | 1.15E-06 | 0.1328038 | 0.298 | 0.261 | 0.02766443 | 2.4 | CREBRF    | 1.141762452 |
| RABGAP1L2    | 1.18E-06 | 0.167471  | 0.259 | 0.225 | 0.02845546 | 2.4 | RABGAP1L  | 1.151111111 |
| KRT182       | 1.19E-06 | 0.2320414 | 0.134 | 0.106 | 0.02864498 | 2.4 | KRT18     | 1.264150943 |
| CITED21      | 1.23E-06 | 0.1021047 | 0.085 | 0.062 | 0.02974966 | 2.4 | CITED2    | 1.370967742 |
| TLDC12       | 1.31E-06 | 0.1290201 | 0.119 | 0.093 | 0.03159053 | 2.4 | TLDC1     | 1.279569892 |
| MTIF32       | 1.48E-06 | 0.1411078 | 0.303 | 0.268 | 0.03568191 | 2.4 | MTIF3     | 1.130597015 |
| LURAP1L-AS13 | 1.53E-06 | 0.1403678 | 0.114 | 0.088 | 0.03685437 | 2.4 | LURAP1L-A | 1.295454545 |
| IL1RAP       | 1.56E-06 | 0.1035909 | 0.072 | 0.051 | 0.0376889  | 2.4 | IL1RAP    | 1.411764706 |
| POU2F11      | 1.89E-06 | 0.1164864 | 0.195 | 0.162 | 0.04550727 | 2.4 | POU2F1    | 1.203703704 |
| MYO9A1       | 1.91E-06 | 0.1176866 | 0.351 | 0.314 | 0.04617451 | 2.4 | MYO9A     | 1.117834395 |
| NDUFS1       | 1.97E-06 | 0.1332914 | 0.175 | 0.145 | 0.04748737 | 2.4 | NDUFS1    | 1.206896552 |
| NRXN33       | 2.05E-06 | 0.1131877 | 0.155 | 0.124 | 0.04931568 | 2.4 | NRXN3     | 1.25        |
| HDGF2        | 2.07E-06 | 0.1300834 | 0.296 | 0.263 | 0.04985295 | 2.4 | HDGF      | 1.125475285 |
| TNFSF102     | 0        | 1.479071  | 0.787 | 0.426 | 0          | 2.5 | TNFSF10   | 1.84741784  |
| TMC51        | 0        | 1.47386   | 0.63  | 0.161 | 0          | 2.5 | TMC5      | 3.913043478 |
| S100A61      | 0        | 1.469818  | 0.878 | 0.529 | 0          | 2.5 | S100A6    | 1.65973535  |
| TSPAN18      | 0        | 1.368976  | 0.546 | 0.181 | 0          | 2.5 | TSPAN1    | 3.016574586 |
| ANKS1B2      | 0        | 1.328653  | 0.851 | 0.404 | 0          | 2.5 | ANKS1B    | 2.106435644 |
| PTPRE1       | 0        | 1.298511  | 0.639 | 0.211 | 0          | 2.5 | PTPRE     | 3.028436019 |
| SAT11        | 0        | 1.280269  | 0.998 | 0.977 | 0          | 2.5 | SAT1      | 1.021494371 |
| AFF34        | 0        | 1.27643   | 0.744 | 0.28  | 0          | 2.5 | AFF3      | 2.657142857 |
| SLC7A24      | 0        | 1.271685  | 0.724 | 0.239 | 0          | 2.5 | SLC7A2    | 3.029288703 |
| ERBB44       | 0        | 1.257394  | 0.918 | 0.431 | 0          | 2.5 | ERBB4     | 2.129930394 |
| CSGALNACT11  | 0        | 1.234559  | 0.522 | 0.136 | 0          | 2.5 | CSGALNAC  | 3.838235294 |
| SMYD31       | 0        | 1.230147  | 0.695 | 0.289 | 0          | 2.5 | SMYD3     | 2.404844291 |
| MAP3K17      | 0        | 1.227693  | 0.84  | 0.402 | 0          | 2.5 | MAP3K1    | 2.089552239 |
| NAALADL23    | 0        | 1.224861  | 0.846 | 0.453 | 0          | 2.5 | NAALADL2  | 1.867549669 |
| KCCAT211     | 0        | 1.192615  | 0.37  | 0.075 | 0          | 2.5 | KCCAT211  | 4.933333333 |
| ALCAM4       | 0        | 1.189142  | 0.88  | 0.458 | 0          | 2.5 | ALCAM     | 1.92139738  |
| LIMCH12      | 0        | 1.098424  | 0.867 | 0.432 | 0          | 2.5 | LIMCH1    | 2.006944444 |

|                |           |           |       |       |           |     |                       |             |
|----------------|-----------|-----------|-------|-------|-----------|-----|-----------------------|-------------|
| FOXP12         | 0         | 1.091106  | 0.931 | 0.591 | 0         | 2.5 | FOXP1                 | 1.575296108 |
| TBX34          | 0         | 1.063704  | 0.638 | 0.217 | 0         | 2.5 | TBX3                  | 2.940092166 |
| TSC22D32       | 0         | 1.060541  | 0.472 | 0.146 | 0         | 2.5 | TSC22D3               | 3.232876712 |
| C1QTNF3-AMACR1 | 0         | 1.045794  | 0.617 | 0.275 | 0         | 2.5 | C1QTNF3- <del>A</del> | 2.243636364 |
| PCED1B1        | 0         | 1.014991  | 0.369 | 0.074 | 0         | 2.5 | PCED1B                | 4.986486486 |
| ZMYND82        | 0         | 1.012139  | 0.637 | 0.292 | 0         | 2.5 | ZMYND8                | 2.181506849 |
| NBEA1          | 0         | 0.9924619 | 0.577 | 0.204 | 0         | 2.5 | NBEA                  | 2.828431373 |
| ZFP36L11       | 0         | 0.9778988 | 0.857 | 0.554 | 0         | 2.5 | ZFP36L1               | 1.546931408 |
| DPYD2          | 0         | 0.9664844 | 0.825 | 0.475 | 0         | 2.5 | DPYD                  | 1.736842105 |
| TFPI4          | 0         | 0.9502498 | 0.692 | 0.273 | 0         | 2.5 | TFPI                  | 2.534798535 |
| COL4A54        | 0         | 0.9471422 | 0.551 | 0.172 | 0         | 2.5 | COL4A5                | 3.203488372 |
| CAPN83         | 0         | 0.9448668 | 0.547 | 0.171 | 0         | 2.5 | CAPN8                 | 3.198830409 |
| FRY            | 0         | 0.9293445 | 0.353 | 0.066 | 0         | 2.5 | FRY                   | 5.348484848 |
| TMSB4X2        | 0         | 0.927827  | 0.984 | 0.93  | 0         | 2.5 | TMSB4X                | 1.058064516 |
| TTC63          | 0         | 0.8815035 | 0.466 | 0.132 | 0         | 2.5 | TTC6                  | 3.53030303  |
| EIF4G32        | 0         | 0.8743323 | 0.838 | 0.464 | 0         | 2.5 | EIF4G3                | 1.806034483 |
| SPTSSB3        | 0         | 0.8638142 | 0.3   | 0.06  | 0         | 2.5 | SPTSSB                | 5           |
| ST8SIA62       | 0         | 0.8277039 | 0.36  | 0.096 | 0         | 2.5 | ST8SIA6               | 3.75        |
| INPP4B3        | 0         | 0.7691871 | 0.682 | 0.278 | 0         | 2.5 | INPP4B                | 2.45323741  |
| SDR16C51       | 0         | 0.7297625 | 0.294 | 0.06  | 0         | 2.5 | SDR16C5               | 4.9         |
| DNAJC124       | 0         | 0.7080874 | 0.756 | 0.338 | 0         | 2.5 | DNAJC12               | 2.236686391 |
| MALAT14        | 0         | 0.6716096 | 1     | 1     | 0         | 2.5 | MALAT1                | 1           |
| ANKRD30A4      | 7.49E-308 | 0.8350091 | 0.834 | 0.419 | 1.81E-303 | 2.5 | ANKRD30A              | 1.990453461 |
| PRSS232        | 3.49E-304 | 0.8938996 | 0.505 | 0.181 | 8.43E-300 | 2.5 | PRSS23                | 2.790055249 |
| C8orf44        | 7.31E-303 | 0.5780276 | 0.87  | 0.469 | 1.76E-298 | 2.5 | C8orf4                | 1.855010661 |
| SYTL22         | 1.66E-301 | 0.826966  | 0.791 | 0.402 | 4.00E-297 | 2.5 | SYTL2                 | 1.967661692 |
| SCCPDH1        | 1.84E-297 | 0.6922905 | 0.295 | 0.068 | 4.44E-293 | 2.5 | SCCPDH                | 4.338235294 |
| TBC1D93        | 6.10E-295 | 0.8523987 | 0.763 | 0.404 | 1.47E-290 | 2.5 | TBC1D9                | 1.888613861 |
| TNC4           | 6.08E-292 | 0.8872298 | 0.65  | 0.286 | 1.47E-287 | 2.5 | TNC                   | 2.272727273 |
| TMEM45B3       | 2.15E-281 | 0.7481701 | 0.412 | 0.13  | 5.19E-277 | 2.5 | TMEM45B               | 3.169230769 |
| ATP1B11        | 1.17E-277 | 0.899192  | 0.948 | 0.735 | 2.82E-273 | 2.5 | ATP1B1                | 1.289795918 |
| ACADSB4        | 6.09E-276 | 0.8128398 | 0.468 | 0.165 | 1.47E-271 | 2.5 | ACADSB                | 2.836363636 |
| VAMP82         | 3.21E-272 | 0.8582402 | 0.908 | 0.738 | 7.73E-268 | 2.5 | VAMP8                 | 1.230352304 |
| NCKAP52        | 3.44E-271 | 0.9056031 | 0.423 | 0.143 | 8.28E-267 | 2.5 | NCKAP5                | 2.958041958 |
| RP11-96H19.11  | 7.96E-267 | 0.9303898 | 0.442 | 0.162 | 1.92E-262 | 2.5 | RP11-96H1             | 2.728395062 |
| FARP11         | 2.11E-263 | 0.9471035 | 0.653 | 0.341 | 5.09E-259 | 2.5 | FARP1                 | 1.914956012 |
| RORA2          | 3.52E-256 | 0.9166008 | 0.824 | 0.537 | 8.50E-252 | 2.5 | RORA                  | 1.534450652 |
| DLGAP13        | 8.48E-256 | 0.7899208 | 0.456 | 0.167 | 2.05E-251 | 2.5 | DLGAP1                | 2.730538922 |
| AGR34          | 3.67E-252 | 0.7356591 | 0.482 | 0.179 | 8.84E-248 | 2.5 | AGR3                  | 2.69273743  |
| ASPH3          | 1.05E-248 | 0.7601155 | 0.561 | 0.245 | 2.52E-244 | 2.5 | ASPH                  | 2.289795918 |
| VAV34          | 4.53E-246 | 0.8415737 | 0.557 | 0.247 | 1.09E-241 | 2.5 | VAV3                  | 2.255060729 |
| LYPD6B1        | 9.71E-246 | 0.6931654 | 0.311 | 0.086 | 2.34E-241 | 2.5 | LYPD6B                | 3.61627907  |
| ENPP13         | 3.47E-240 | 0.6893637 | 0.344 | 0.104 | 8.37E-236 | 2.5 | ENPP1                 | 3.307692308 |
| SERHL22        | 1.77E-239 | 0.8295259 | 0.347 | 0.11  | 4.26E-235 | 2.5 | SERHL2                | 3.154545455 |
| S100A113       | 2.18E-238 | 0.7636028 | 0.911 | 0.697 | 5.25E-234 | 2.5 | S100A11               | 1.307030129 |
| C16orf452      | 1.01E-233 | 0.7293115 | 0.484 | 0.192 | 2.43E-229 | 2.5 | C16orf45              | 2.520833333 |
| NTN41          | 1.21E-233 | 0.8470543 | 0.569 | 0.262 | 2.92E-229 | 2.5 | NTN4                  | 2.171755725 |
| TBL1XR12       | 2.43E-232 | 0.7754595 | 0.825 | 0.547 | 5.86E-228 | 2.5 | TBL1XR1               | 1.508226691 |
| TFAP2B2        | 8.61E-232 | 0.6074217 | 0.215 | 0.045 | 2.08E-227 | 2.5 | TFAP2B                | 4.777777778 |
| CPE4           | 1.21E-229 | 0.7540153 | 0.446 | 0.17  | 2.92E-225 | 2.5 | CPE                   | 2.623529412 |
| MAML31         | 1.55E-226 | 0.7893322 | 0.623 | 0.312 | 3.73E-222 | 2.5 | MAML3                 | 1.996794872 |
| EPB41L4A1      | 2.46E-223 | 0.6577095 | 0.378 | 0.13  | 5.92E-219 | 2.5 | EPB41L4A              | 2.907692308 |

|             |           |           |       |       |           |     |           |             |
|-------------|-----------|-----------|-------|-------|-----------|-----|-----------|-------------|
| BCAR32      | 3.83E-223 | 0.7831407 | 0.543 | 0.242 | 9.23E-219 | 2.5 | BCAR3     | 2.243801653 |
| NEBL2       | 5.52E-221 | 0.6802555 | 0.899 | 0.629 | 1.33E-216 | 2.5 | NEBL      | 1.429252782 |
| CFB1        | 3.56E-220 | 0.9767366 | 0.356 | 0.125 | 8.59E-216 | 2.5 | CFB       | 2.848       |
| S100A41     | 3.48E-219 | 0.818512  | 0.354 | 0.122 | 8.39E-215 | 2.5 | S100A4    | 2.901639344 |
| GLCCI13     | 1.95E-217 | 0.6576225 | 0.578 | 0.262 | 4.71E-213 | 2.5 | GLCCI1    | 2.20610687  |
| APBB22      | 1.87E-216 | 0.7776505 | 0.507 | 0.222 | 4.50E-212 | 2.5 | APBB2     | 2.283783784 |
| TRERF11     | 6.72E-216 | 0.6719563 | 0.376 | 0.131 | 1.62E-211 | 2.5 | TRERF1    | 2.870229008 |
| NFIA1       | 1.51E-213 | 0.7591702 | 0.41  | 0.158 | 3.63E-209 | 2.5 | NFIA      | 2.594936709 |
| TPCN13      | 4.76E-212 | 0.6661746 | 0.373 | 0.135 | 1.15E-207 | 2.5 | TPCN1     | 2.762962963 |
| CENPP       | 1.85E-207 | 0.6674842 | 0.194 | 0.041 | 4.46E-203 | 2.5 | CENPP     | 4.731707317 |
| LINC005782  | 2.11E-206 | 0.6289211 | 0.222 | 0.053 | 5.09E-202 | 2.5 | LINC00578 | 4.188679245 |
| BCKDHB1     | 8.62E-206 | 0.6314963 | 0.3   | 0.093 | 2.08E-201 | 2.5 | BCKDHB    | 3.225806452 |
| IFITM2      | 4.43E-202 | 0.6128945 | 0.235 | 0.062 | 1.07E-197 | 2.5 | IFITM2    | 3.790322581 |
| ABCC31      | 2.55E-198 | 0.5443292 | 0.235 | 0.061 | 6.14E-194 | 2.5 | ABCC3     | 3.852459016 |
| AC018359.11 | 7.00E-197 | 0.6761579 | 0.143 | 0.023 | 1.69E-192 | 2.5 | AC018359. | 6.217391304 |
| RAB11FIP13  | 9.44E-197 | 0.5981151 | 0.943 | 0.703 | 2.28E-192 | 2.5 | RAB11FIP1 | 1.341394026 |
| SLC38A23    | 1.08E-196 | 0.6877661 | 0.645 | 0.344 | 2.61E-192 | 2.5 | SLC38A2   | 1.875       |
| SAMD122     | 5.61E-194 | 0.7007213 | 0.479 | 0.217 | 1.35E-189 | 2.5 | SAMD12    | 2.207373272 |
| OSBPL32     | 2.40E-193 | 0.6532704 | 0.464 | 0.198 | 5.79E-189 | 2.5 | OSBPL3    | 2.343434343 |
| CYB5A3      | 4.67E-193 | 0.695371  | 0.497 | 0.225 | 1.13E-188 | 2.5 | CYB5A     | 2.208888889 |
| PIP5K1B1    | 3.67E-192 | 0.7172597 | 0.304 | 0.1   | 8.86E-188 | 2.5 | PIP5K1B   | 3.04        |
| SETBP11     | 5.68E-191 | 0.6216314 | 0.261 | 0.077 | 1.37E-186 | 2.5 | SETBP1    | 3.38961039  |
| SLC27A44    | 1.28E-190 | 0.9223354 | 0.878 | 0.679 | 3.09E-186 | 2.5 | SLC27A4   | 1.293078056 |
| CTNND24     | 6.33E-189 | 0.648051  | 0.35  | 0.126 | 1.53E-184 | 2.5 | CTNND2    | 2.777777778 |
| TANC22      | 1.05E-188 | 0.6410187 | 0.739 | 0.439 | 2.54E-184 | 2.5 | TANC2     | 1.683371298 |
| MAP3K53     | 3.66E-187 | 0.747424  | 0.613 | 0.33  | 8.82E-183 | 2.5 | MAP3K5    | 1.857575758 |
| ESR12       | 2.41E-184 | 0.6758758 | 0.389 | 0.156 | 5.82E-180 | 2.5 | ESR1      | 2.493589744 |
| TTC39C1     | 6.52E-181 | 0.7178507 | 0.418 | 0.179 | 1.57E-176 | 2.5 | TTC39C    | 2.335195531 |
| DACH13      | 2.85E-177 | 0.532952  | 0.254 | 0.075 | 6.87E-173 | 2.5 | DACH1     | 3.386666667 |
| SEMA3C3     | 3.26E-177 | 0.6346741 | 0.522 | 0.245 | 7.86E-173 | 2.5 | SEMA3C    | 2.130612245 |
| MPP74       | 3.81E-176 | 0.5143546 | 0.286 | 0.093 | 9.18E-172 | 2.5 | MPP7      | 3.075268817 |
| ARHGAP322   | 4.04E-176 | 0.6937716 | 0.656 | 0.381 | 9.75E-172 | 2.5 | ARHGAP32  | 1.721784777 |
| SPIDR3      | 1.71E-175 | 0.6379427 | 0.821 | 0.569 | 4.11E-171 | 2.5 | SPIDR     | 1.44288225  |
| PBX11       | 4.36E-175 | 0.7366639 | 0.483 | 0.231 | 1.05E-170 | 2.5 | PBX1      | 2.090909091 |
| CYP4Z1      | 5.28E-175 | 0.3009836 | 0.073 | 0.005 | 1.27E-170 | 2.5 | CYP4Z1    | 14.6        |
| MAGI34      | 3.10E-174 | 0.6111166 | 0.635 | 0.347 | 7.46E-170 | 2.5 | MAGI3     | 1.829971182 |
| TP53INP11   | 1.49E-173 | 0.4679766 | 0.223 | 0.061 | 3.60E-169 | 2.5 | TP53INP1  | 3.655737705 |
| DRAM12      | 4.13E-173 | 0.645434  | 0.532 | 0.263 | 9.97E-169 | 2.5 | DRAM1     | 2.022813688 |
| SERPINA32   | 4.27E-173 | 0.8792486 | 0.48  | 0.234 | 1.03E-168 | 2.5 | SERPINA3  | 2.051282051 |
| UTRN2       | 9.49E-173 | 0.6738027 | 0.504 | 0.247 | 2.29E-168 | 2.5 | UTRN      | 2.04048583  |
| SFMBT23     | 1.13E-172 | 0.6040404 | 0.366 | 0.141 | 2.74E-168 | 2.5 | SFMBT2    | 2.595744681 |
| PRLR3       | 1.92E-171 | 0.6829572 | 0.453 | 0.206 | 4.62E-167 | 2.5 | PRLR      | 2.199029126 |
| AZGP14      | 1.93E-171 | 0.8090948 | 0.775 | 0.515 | 4.65E-167 | 2.5 | AZGP1     | 1.504854369 |
| DUSP43      | 9.64E-170 | 0.5435319 | 0.31  | 0.11  | 2.33E-165 | 2.5 | DUSP4     | 2.818181818 |
| IRF2BPL3    | 3.48E-169 | 0.6067323 | 0.349 | 0.137 | 8.38E-165 | 2.5 | IRF2BPL   | 2.547445255 |
| EFHD14      | 5.76E-169 | 0.5065805 | 0.556 | 0.264 | 1.39E-164 | 2.5 | EFHD1     | 2.106060606 |
| PLAT4       | 1.10E-168 | 0.6972723 | 0.231 | 0.067 | 2.64E-164 | 2.5 | PLAT      | 3.447761194 |
| RUNX12      | 3.92E-166 | 0.5954793 | 0.855 | 0.614 | 9.45E-162 | 2.5 | RUNX1     | 1.392508143 |
| PTPRM2      | 2.96E-165 | 0.6257088 | 0.461 | 0.21  | 7.14E-161 | 2.5 | PTPRM     | 2.195238095 |
| SMIM144     | 4.04E-164 | 0.5246246 | 0.661 | 0.362 | 9.74E-160 | 2.5 | SMIM14    | 1.825966851 |
| FBXL172     | 1.25E-163 | 0.6785535 | 0.483 | 0.235 | 3.01E-159 | 2.5 | FBXL17    | 2.055319149 |
| NEAT13      | 2.65E-163 | 0.6258352 | 0.996 | 0.94  | 6.39E-159 | 2.5 | NEAT1     | 1.059574468 |

|           |           |           |       |       |           |     |          |             |
|-----------|-----------|-----------|-------|-------|-----------|-----|----------|-------------|
| KIF16B3   | 8.17E-163 | 0.585015  | 0.383 | 0.159 | 1.97E-158 | 2.5 | KIF16B   | 2.408805031 |
| DIO24     | 2.95E-162 | 0.7292798 | 0.437 | 0.193 | 7.11E-158 | 2.5 | DIO2     | 2.264248705 |
| CD91      | 8.03E-162 | 0.6717441 | 0.621 | 0.354 | 1.94E-157 | 2.5 | CD9      | 1.754237288 |
| MSI23     | 4.33E-160 | 0.6000809 | 0.578 | 0.31  | 1.04E-155 | 2.5 | MSI2     | 1.864516129 |
| SLC44A43  | 4.76E-159 | 0.5199197 | 0.278 | 0.095 | 1.15E-154 | 2.5 | SLC44A4  | 2.926315789 |
| EREG4     | 8.29E-159 | 0.7725099 | 0.483 | 0.23  | 2.00E-154 | 2.5 | EREG     | 2.1         |
| PTPN134   | 9.72E-159 | 0.5573398 | 0.373 | 0.152 | 2.34E-154 | 2.5 | PTPN13   | 2.453947368 |
| TSC22D12  | 3.88E-158 | 0.6474633 | 0.599 | 0.333 | 9.36E-154 | 2.5 | TSC22D1  | 1.798798799 |
| FGF133    | 1.45E-157 | 0.5046491 | 0.713 | 0.416 | 3.50E-153 | 2.5 | FGF13    | 1.713942308 |
| MTSS12    | 1.48E-157 | 0.6338678 | 0.335 | 0.129 | 3.57E-153 | 2.5 | MTSS1    | 2.596899225 |
| LRBA3     | 1.61E-156 | 0.3570232 | 0.872 | 0.605 | 3.87E-152 | 2.5 | LRBA     | 1.441322314 |
| MOCOS1    | 6.48E-156 | 0.5476253 | 0.258 | 0.086 | 1.56E-151 | 2.5 | MOCOS    | 3           |
| FTX3      | 2.60E-154 | 0.5906421 | 0.791 | 0.523 | 6.27E-150 | 2.5 | FTX      | 1.512428298 |
| MYCBP22   | 4.27E-154 | 0.6161688 | 0.436 | 0.206 | 1.03E-149 | 2.5 | MYCBP2   | 2.116504854 |
| THSD42    | 3.42E-153 | 0.6165288 | 0.786 | 0.531 | 8.24E-149 | 2.5 | THSD4    | 1.480225989 |
| SEMA4B    | 1.53E-152 | 0.5862785 | 0.421 | 0.196 | 3.68E-148 | 2.5 | SEMA4B   | 2.147959184 |
| SUMF12    | 2.06E-152 | 0.6035206 | 0.337 | 0.136 | 4.98E-148 | 2.5 | SUMF1    | 2.477941176 |
| MYBPC13   | 4.37E-152 | 0.7182112 | 0.44  | 0.203 | 1.05E-147 | 2.5 | MYBPC1   | 2.167487685 |
| SIDT11    | 1.22E-151 | 0.4033366 | 0.141 | 0.029 | 2.95E-147 | 2.5 | SIDT1    | 4.862068966 |
| CERS63    | 1.56E-151 | 0.5022639 | 0.35  | 0.14  | 3.75E-147 | 2.5 | CERS6    | 2.5         |
| TMBIM64   | 6.42E-150 | 0.538718  | 0.946 | 0.848 | 1.55E-145 | 2.5 | TMBIM6   | 1.115566038 |
| GLUL1     | 9.20E-149 | 0.5791993 | 0.599 | 0.345 | 2.22E-144 | 2.5 | GLUL     | 1.736231884 |
| BCL2L111  | 3.04E-148 | 0.5483928 | 0.285 | 0.105 | 7.34E-144 | 2.5 | BCL2L11  | 2.714285714 |
| KLHL21    | 6.03E-148 | 0.5097396 | 0.304 | 0.115 | 1.45E-143 | 2.5 | KLHL2    | 2.643478261 |
| ITGAV4    | 1.43E-147 | 0.5348664 | 0.643 | 0.365 | 3.46E-143 | 2.5 | ITGAV    | 1.761643836 |
| IER33     | 1.81E-147 | 0.5660957 | 0.544 | 0.287 | 4.36E-143 | 2.5 | IER3     | 1.895470383 |
| MEIS11    | 1.01E-146 | 0.4743201 | 0.192 | 0.053 | 2.45E-142 | 2.5 | MEIS1    | 3.622641509 |
| MBOAT11   | 2.65E-146 | 0.5490085 | 0.299 | 0.112 | 6.38E-142 | 2.5 | MBOAT1   | 2.669642857 |
| MICAL21   | 4.18E-146 | 0.5685406 | 0.302 | 0.116 | 1.01E-141 | 2.5 | MICAL2   | 2.603448276 |
| CADPS23   | 1.16E-145 | 0.4212723 | 0.637 | 0.371 | 2.81E-141 | 2.5 | CADPS2   | 1.716981132 |
| WWP12     | 3.70E-145 | 0.5605005 | 0.531 | 0.28  | 8.92E-141 | 2.5 | WWP1     | 1.896428571 |
| PDCD41    | 5.38E-145 | 0.67127   | 0.432 | 0.213 | 1.30E-140 | 2.5 | PDCD4    | 2.028169014 |
| CD634     | 2.36E-144 | 0.5734397 | 0.612 | 0.349 | 5.70E-140 | 2.5 | CD63     | 1.753581662 |
| TSPAN53   | 7.86E-144 | 0.4898268 | 0.55  | 0.274 | 1.90E-139 | 2.5 | TSPAN5   | 2.00729927  |
| CCDC912   | 8.04E-144 | 0.6025564 | 0.563 | 0.317 | 1.94E-139 | 2.5 | CCDC91   | 1.776025237 |
| BRE2      | 2.14E-143 | 0.5903064 | 0.398 | 0.182 | 5.15E-139 | 2.5 | BRE      | 2.186813187 |
| MAST43    | 4.13E-143 | 0.5573245 | 0.76  | 0.495 | 9.97E-139 | 2.5 | MAST4    | 1.535353535 |
| CLIC63    | 6.28E-143 | 0.5702089 | 0.412 | 0.19  | 1.51E-138 | 2.5 | CLIC6    | 2.168421053 |
| TFAP2A1   | 1.02E-142 | 0.4994633 | 0.326 | 0.131 | 2.46E-138 | 2.5 | TFAP2A   | 2.488549618 |
| EXOC43    | 3.02E-141 | 0.5832219 | 0.55  | 0.307 | 7.28E-137 | 2.5 | EXOC4    | 1.791530945 |
| RAB27B3   | 4.14E-141 | 0.5457113 | 0.322 | 0.129 | 9.97E-137 | 2.5 | RAB27B   | 2.496124031 |
| GLI34     | 1.05E-140 | 0.4723797 | 0.299 | 0.113 | 2.53E-136 | 2.5 | GLI3     | 2.646017699 |
| RALGAPA2  | 1.89E-140 | 0.574572  | 0.459 | 0.23  | 4.55E-136 | 2.5 | RALGAPA2 | 1.995652174 |
| PARD3B1   | 2.42E-140 | 0.565095  | 0.388 | 0.176 | 5.84E-136 | 2.5 | PARD3B   | 2.204545455 |
| ENOX13    | 2.51E-140 | 0.595569  | 0.3   | 0.116 | 6.04E-136 | 2.5 | ENOX1    | 2.586206897 |
| LSAMP4    | 3.38E-140 | 0.5739959 | 0.705 | 0.438 | 8.16E-136 | 2.5 | LSAMP    | 1.609589041 |
| C1orf1321 | 1.76E-139 | 0.4905142 | 0.248 | 0.086 | 4.25E-135 | 2.5 | C1orf132 | 2.88372093  |
| CD442     | 3.00E-139 | 0.6168511 | 0.788 | 0.561 | 7.22E-135 | 2.5 | CD44     | 1.404634581 |
| SOX43     | 4.96E-139 | 0.4406607 | 0.966 | 0.82  | 1.20E-134 | 2.5 | SOX4     | 1.17804878  |
| SERPINA1  | 7.51E-139 | 0.3935188 | 0.196 | 0.057 | 1.81E-134 | 2.5 | SERPINA1 | 3.438596491 |
| ITFG13    | 2.65E-138 | 0.5783815 | 0.471 | 0.244 | 6.39E-134 | 2.5 | ITFG1    | 1.930327869 |
| CUX11     | 2.93E-138 | 0.5509483 | 0.567 | 0.319 | 7.06E-134 | 2.5 | CUX1     | 1.777429467 |

|                |           |           |       |       |           |     |           |             |
|----------------|-----------|-----------|-------|-------|-----------|-----|-----------|-------------|
| RAPH14         | 6.49E-138 | 0.5736625 | 0.554 | 0.306 | 1.56E-133 | 2.5 | RAPH1     | 1.810457516 |
| OPHN11         | 9.09E-136 | 0.5725906 | 0.541 | 0.298 | 2.19E-131 | 2.5 | OPHN1     | 1.815436242 |
| UMAD12         | 2.56E-135 | 0.5374922 | 0.393 | 0.18  | 6.17E-131 | 2.5 | UMAD1     | 2.183333333 |
| ARHGEF31       | 3.04E-134 | 0.5341274 | 0.601 | 0.352 | 7.34E-130 | 2.5 | ARHGEF3   | 1.707386364 |
| WVOX2          | 1.44E-133 | 0.683638  | 0.422 | 0.209 | 3.48E-129 | 2.5 | WVOX      | 2.019138756 |
| ADAM102        | 2.10E-133 | 0.5261247 | 0.593 | 0.343 | 5.06E-129 | 2.5 | ADAM10    | 1.728862974 |
| ITGA31         | 2.35E-132 | 0.5437734 | 0.351 | 0.155 | 5.68E-128 | 2.5 | ITGA3     | 2.264516129 |
| RASEF4         | 3.45E-132 | 0.4772277 | 0.486 | 0.242 | 8.31E-128 | 2.5 | RASEF     | 2.008264463 |
| ERMP12         | 1.67E-131 | 0.3413629 | 0.153 | 0.038 | 4.02E-127 | 2.5 | ERMP1     | 4.026315789 |
| ZBTB203        | 3.91E-131 | 0.539361  | 0.734 | 0.491 | 9.43E-127 | 2.5 | ZBTB20    | 1.49490835  |
| KLHL51         | 3.08E-130 | 0.588158  | 0.482 | 0.257 | 7.42E-126 | 2.5 | KLHL5     | 1.875486381 |
| PARK21         | 1.11E-129 | 0.5402603 | 0.352 | 0.157 | 2.67E-125 | 2.5 | PARK2     | 2.242038217 |
| TRPS13         | 1.57E-129 | 0.5397433 | 0.903 | 0.713 | 3.78E-125 | 2.5 | TRPS1     | 1.266479663 |
| AGO41          | 4.59E-129 | 0.5206867 | 0.345 | 0.152 | 1.11E-124 | 2.5 | AGO4      | 2.269736842 |
| FKBP53         | 7.43E-129 | 0.6948966 | 0.536 | 0.308 | 1.79E-124 | 2.5 | FKBP5     | 1.74025974  |
| MIPOL13        | 2.02E-127 | 0.4611143 | 0.364 | 0.159 | 4.87E-123 | 2.5 | MIPOL1    | 2.289308176 |
| TRIQK2         | 5.20E-127 | 0.3820212 | 0.201 | 0.063 | 1.25E-122 | 2.5 | TRIQK     | 3.19047619  |
| EMP23          | 6.81E-127 | 0.458815  | 0.269 | 0.101 | 1.64E-122 | 2.5 | EMP2      | 2.663366337 |
| PTGR11         | 3.08E-123 | 0.7264649 | 0.464 | 0.257 | 7.43E-119 | 2.5 | PTGR1     | 1.805447471 |
| RP11-774D14.11 | 6.71E-121 | 0.4609495 | 0.237 | 0.087 | 1.62E-116 | 2.5 | RP11-774D | 2.724137931 |
| PTGS11         | 9.37E-121 | 0.239404  | 0.07  | 0.008 | 2.26E-116 | 2.5 | PTGS1     | 8.75        |
| PERP3          | 1.13E-120 | 0.5263032 | 0.661 | 0.425 | 2.73E-116 | 2.5 | PERP      | 1.555294118 |
| ANK32          | 3.19E-120 | 0.504737  | 0.502 | 0.276 | 7.70E-116 | 2.5 | ANK3      | 1.81884058  |
| TNIK4          | 8.69E-120 | 0.4577357 | 0.324 | 0.138 | 2.09E-115 | 2.5 | TNIK      | 2.347826087 |
| AC018816.34    | 1.62E-119 | 0.4838205 | 0.227 | 0.081 | 3.91E-115 | 2.5 | AC018816  | 2.802469136 |
| TPBG2          | 1.72E-119 | 0.4663969 | 0.354 | 0.16  | 4.16E-115 | 2.5 | TPBG      | 2.2125      |
| DSTN2          | 3.27E-119 | 0.5419875 | 0.762 | 0.559 | 7.88E-115 | 2.5 | DSTN      | 1.363148479 |
| DUSP164        | 3.57E-119 | 0.5604934 | 0.626 | 0.392 | 8.61E-115 | 2.5 | DUSP16    | 1.596938776 |
| DUSP104        | 3.64E-119 | 0.4786957 | 0.412 | 0.198 | 8.78E-115 | 2.5 | DUSP10    | 2.080808081 |
| VWA82          | 4.07E-119 | 0.4550589 | 0.23  | 0.083 | 9.81E-115 | 2.5 | VWA8      | 2.771084337 |
| TP53INP21      | 3.16E-118 | 0.3062001 | 0.138 | 0.035 | 7.62E-114 | 2.5 | TP53INP2  | 3.942857143 |
| XBP12          | 3.16E-118 | 0.4943014 | 0.591 | 0.363 | 7.62E-114 | 2.5 | XBP1      | 1.628099174 |
| TMSB104        | 6.21E-118 | 0.6308952 | 0.865 | 0.714 | 1.50E-113 | 2.5 | TMSB10    | 1.211484594 |
| MBD52          | 2.89E-117 | 0.5346163 | 0.497 | 0.279 | 6.97E-113 | 2.5 | MBD5      | 1.781362007 |
| TOX33          | 7.59E-117 | 0.530528  | 0.333 | 0.148 | 1.83E-112 | 2.5 | TOX3      | 2.25        |
| STEAP41        | 2.41E-116 | 0.2876816 | 0.11  | 0.023 | 5.81E-112 | 2.5 | STEAP4    | 4.782608696 |
| DLG53          | 4.11E-116 | 0.6456548 | 0.442 | 0.238 | 9.92E-112 | 2.5 | DLG5      | 1.857142857 |
| CD992          | 5.52E-115 | 0.4079228 | 0.286 | 0.116 | 1.33E-110 | 2.5 | CD99      | 2.465517241 |
| SRPX21         | 6.37E-115 | 0.3918603 | 0.183 | 0.058 | 1.54E-110 | 2.5 | SRPX2     | 3.155172414 |
| STC21          | 1.87E-114 | 0.4641089 | 0.22  | 0.079 | 4.51E-110 | 2.5 | STC2      | 2.784810127 |
| LINC-PINT3     | 9.88E-114 | 0.4909471 | 0.772 | 0.547 | 2.38E-109 | 2.5 | LINC-PINT | 1.411334552 |
| CPEB24         | 3.53E-113 | 0.4746124 | 0.518 | 0.28  | 8.50E-109 | 2.5 | CPEB2     | 1.85        |
| FAAH22         | 4.30E-112 | 0.5242255 | 0.366 | 0.182 | 1.04E-107 | 2.5 | FAAH2     | 2.010989011 |
| HIST1H2AC3     | 5.18E-112 | 0.5870304 | 0.555 | 0.339 | 1.25E-107 | 2.5 | HIST1H2AC | 1.637168142 |
| VPS13B2        | 5.24E-112 | 0.4738355 | 0.383 | 0.19  | 1.26E-107 | 2.5 | VPS13B    | 2.015789474 |
| FNIP23         | 1.82E-111 | 0.4419374 | 0.237 | 0.089 | 4.38E-107 | 2.5 | FNIP2     | 2.662921348 |
| TTLL52         | 6.07E-111 | 0.4805838 | 0.469 | 0.257 | 1.46E-106 | 2.5 | TTLL5     | 1.824902724 |
| PLD12          | 6.08E-111 | 0.4959671 | 0.266 | 0.11  | 1.47E-106 | 2.5 | PLD1      | 2.418181818 |
| NEDD41         | 8.29E-110 | 0.4655132 | 0.255 | 0.103 | 2.00E-105 | 2.5 | NEDD4     | 2.475728155 |
| RPS6KA52       | 8.80E-110 | 0.5047209 | 0.387 | 0.196 | 2.12E-105 | 2.5 | RPS6KA5   | 1.974489796 |
| WNT5A1         | 4.30E-108 | 0.2957879 | 0.118 | 0.028 | 1.04E-103 | 2.5 | WNT5A     | 4.214285714 |
| NCEH13         | 8.92E-108 | 0.4902243 | 0.62  | 0.384 | 2.15E-103 | 2.5 | NCEH1     | 1.614583333 |

|               |           |           |       |       |           |     |           |             |
|---------------|-----------|-----------|-------|-------|-----------|-----|-----------|-------------|
| FHDC11        | 4.24E-107 | 0.4252307 | 0.255 | 0.103 | 1.02E-102 | 2.5 | FHDC1     | 2.475728155 |
| GRHL22        | 5.62E-107 | 0.5209617 | 0.46  | 0.258 | 1.36E-102 | 2.5 | GRHL2     | 1.782945736 |
| GOLM13        | 6.47E-107 | 0.3942214 | 0.416 | 0.208 | 1.56E-102 | 2.5 | GOLM1     | 2           |
| DHX321        | 8.03E-107 | 0.492352  | 0.48  | 0.272 | 1.94E-102 | 2.5 | DHX32     | 1.764705882 |
| NRIP13        | 1.62E-106 | 0.437659  | 0.457 | 0.242 | 3.90E-102 | 2.5 | NRIP1     | 1.888429752 |
| DGKD3         | 3.42E-106 | 0.4107695 | 0.26  | 0.105 | 8.24E-102 | 2.5 | DGKD      | 2.476190476 |
| NOVA11        | 7.70E-106 | 0.3876768 | 0.17  | 0.054 | 1.86E-101 | 2.5 | NOVA1     | 3.148148148 |
| CRADD1        | 7.88E-106 | 0.4720901 | 0.293 | 0.13  | 1.90E-101 | 2.5 | CRADD     | 2.253846154 |
| FOXA14        | 1.03E-105 | 0.3701799 | 0.252 | 0.1   | 2.49E-101 | 2.5 | FOXA1     | 2.52        |
| TBC1D53       | 4.45E-105 | 0.4673021 | 0.547 | 0.326 | 1.07E-100 | 2.5 | TBC1D5    | 1.67791411  |
| UBAC22        | 1.52E-104 | 0.4706544 | 0.394 | 0.207 | 3.67E-100 | 2.5 | UBAC2     | 1.903381643 |
| ABCA42        | 2.08E-104 | 0.3253378 | 0.131 | 0.035 | 5.00E-100 | 2.5 | ABCA4     | 3.742857143 |
| CASC153       | 5.28E-104 | 0.2385112 | 0.75  | 0.49  | 1.27E-99  | 2.5 | CASC15    | 1.530612245 |
| ARRB11        | 2.60E-103 | 0.346208  | 0.164 | 0.052 | 6.27E-99  | 2.5 | ARRB1     | 3.153846154 |
| MLLT32        | 4.24E-103 | 0.4671974 | 0.39  | 0.199 | 1.02E-98  | 2.5 | MLLT3     | 1.959798995 |
| PSD33         | 3.86E-102 | 0.4515268 | 0.544 | 0.319 | 9.30E-98  | 2.5 | PSD3      | 1.705329154 |
| TTY141        | 1.32E-101 | 0.5850023 | 0.61  | 0.395 | 3.19E-97  | 2.5 | TTY14     | 1.544303797 |
| CTD-2015H6.31 | 1.97E-101 | 0.3489848 | 0.16  | 0.051 | 4.74E-97  | 2.5 | CTD-2015H | 3.137254902 |
| HIST1H2BB3    | 9.28E-101 | 0.4874878 | 0.317 | 0.149 | 2.24E-96  | 2.5 | HIST1H2BB | 2.127516779 |
| HS6ST23       | 9.99E-101 | 0.4478554 | 0.29  | 0.127 | 2.41E-96  | 2.5 | HS6ST2    | 2.283464567 |
| CXCL134       | 1.53E-100 | 0.2824525 | 0.624 | 0.382 | 3.68E-96  | 2.5 | CXCL13    | 1.633507853 |
| SYNE22        | 5.19E-100 | 0.4414687 | 0.736 | 0.519 | 1.25E-95  | 2.5 | SYNE2     | 1.418111753 |
| SCNN1A1       | 7.08E-100 | 0.4081595 | 0.248 | 0.103 | 1.71E-95  | 2.5 | SCNN1A    | 2.40776699  |
| ABCD34        | 1.23E-99  | 0.4063383 | 0.333 | 0.158 | 2.98E-95  | 2.5 | ABCD3     | 2.107594937 |
| IL13RA12      | 1.37E-99  | 0.376032  | 0.254 | 0.105 | 3.30E-95  | 2.5 | IL13RA1   | 2.419047619 |
| C9orf841      | 2.42E-99  | 0.3370685 | 0.165 | 0.054 | 5.83E-95  | 2.5 | C9orf84   | 3.055555556 |
| DGKH2         | 6.46E-99  | 0.408871  | 0.498 | 0.282 | 1.56E-94  | 2.5 | DGKH      | 1.765957447 |
| PARP82        | 1.29E-98  | 0.4516596 | 0.301 | 0.14  | 3.10E-94  | 2.5 | PARP8     | 2.15        |
| WLS4          | 9.03E-98  | 0.4183243 | 0.327 | 0.154 | 2.18E-93  | 2.5 | WLS       | 2.123376623 |
| SPRED21       | 1.45E-97  | 0.4623997 | 0.372 | 0.19  | 3.50E-93  | 2.5 | SPRED2    | 1.957894737 |
| PLPP31        | 2.86E-97  | 0.5280178 | 0.417 | 0.229 | 6.90E-93  | 2.5 | PLPP3     | 1.820960699 |
| DMXL2         | 1.11E-96  | 0.3038703 | 0.123 | 0.033 | 2.67E-92  | 2.5 | DMXL2     | 3.727272727 |
| SLC44A11      | 2.79E-96  | 0.4292842 | 0.28  | 0.126 | 6.73E-92  | 2.5 | SLC44A1   | 2.222222222 |
| PRKG12        | 5.91E-96  | 0.4340116 | 0.29  | 0.129 | 1.43E-91  | 2.5 | PRKG1     | 2.248062016 |
| COL4A63       | 2.66E-95  | 0.3521445 | 0.154 | 0.049 | 6.41E-91  | 2.5 | COL4A6    | 3.142857143 |
| SH2D4A1       | 3.73E-95  | 0.3389544 | 0.142 | 0.043 | 9.00E-91  | 2.5 | SH2D4A    | 3.302325581 |
| PRKAA22       | 7.01E-95  | 0.3916648 | 0.258 | 0.111 | 1.69E-90  | 2.5 | PRKAA2    | 2.324324324 |
| CDC14A4       | 9.68E-95  | 0.4165246 | 0.303 | 0.141 | 2.33E-90  | 2.5 | CDC14A    | 2.14893617  |
| PTMA1         | 1.74E-94  | 0.4751223 | 0.786 | 0.598 | 4.21E-90  | 2.5 | PTMA      | 1.314381271 |
| HNMT2         | 7.26E-94  | 0.5639041 | 0.459 | 0.273 | 1.75E-89  | 2.5 | HNMT      | 1.681318681 |
| LMCD14        | 7.51E-94  | 0.5131694 | 0.227 | 0.092 | 1.81E-89  | 2.5 | LMCD1     | 2.467391304 |
| UGCG2         | 1.23E-93  | 0.4072437 | 0.691 | 0.461 | 2.96E-89  | 2.5 | UGCG      | 1.498915401 |
| PLXND11       | 2.99E-93  | 0.2510312 | 0.1   | 0.023 | 7.21E-89  | 2.5 | PLXND1    | 4.347826087 |
| SLC22A232     | 3.41E-93  | 0.4702261 | 0.411 | 0.226 | 8.21E-89  | 2.5 | SLC22A23  | 1.818584071 |
| PIK3C2B1      | 4.55E-93  | 0.3719676 | 0.193 | 0.072 | 1.10E-88  | 2.5 | PIK3C2B   | 2.680555556 |
| TFF14         | 5.23E-93  | 0.5177294 | 0.223 | 0.09  | 1.26E-88  | 2.5 | TFF1      | 2.477777778 |
| CDC42BPA2     | 1.30E-92  | 0.427174  | 0.568 | 0.356 | 3.14E-88  | 2.5 | CDC42BPA  | 1.595505618 |
| NRP13         | 2.18E-92  | 0.3488184 | 0.15  | 0.048 | 5.26E-88  | 2.5 | NRP1      | 3.125       |
| MPHOSPH62     | 1.62E-91  | 0.350802  | 0.257 | 0.111 | 3.91E-87  | 2.5 | MPHOSPH6  | 2.315315315 |
| CCDC102B2     | 1.70E-91  | 0.346149  | 0.096 | 0.022 | 4.10E-87  | 2.5 | CCDC102B  | 4.363636364 |
| ACER21        | 2.92E-91  | 0.3007216 | 0.128 | 0.037 | 7.04E-87  | 2.5 | ACER2     | 3.459459459 |
| TMTC23        | 3.22E-91  | 0.4130517 | 0.564 | 0.352 | 7.76E-87  | 2.5 | TMTC2     | 1.602272727 |

|                |          |           |       |       |          |     |            |             |
|----------------|----------|-----------|-------|-------|----------|-----|------------|-------------|
| DOCK81         | 2.00E-90 | 0.2873621 | 0.151 | 0.049 | 4.82E-86 | 2.5 | DOCK8      | 3.081632653 |
| REPS12         | 2.22E-90 | 0.5008048 | 0.474 | 0.285 | 5.36E-86 | 2.5 | REPS1      | 1.663157895 |
| ATAD2B2        | 2.59E-90 | 0.4170882 | 0.349 | 0.181 | 6.24E-86 | 2.5 | ATAD2B     | 1.928176796 |
| SSBP23         | 3.36E-90 | 0.4968109 | 0.612 | 0.412 | 8.10E-86 | 2.5 | SSBP2      | 1.485436893 |
| LIMA11         | 3.50E-90 | 0.4584294 | 0.575 | 0.375 | 8.43E-86 | 2.5 | LIMA1      | 1.533333333 |
| RP11-382A20.33 | 8.33E-90 | 0.3687951 | 0.234 | 0.098 | 2.01E-85 | 2.5 | RP11-382A  | 2.387755102 |
| MYL12B4        | 9.60E-90 | 0.3038784 | 0.925 | 0.806 | 2.32E-85 | 2.5 | MYL12B     | 1.14764268  |
| PER21          | 2.01E-89 | 0.398764  | 0.273 | 0.125 | 4.84E-85 | 2.5 | PER2       | 2.184       |
| HMGCLL12       | 2.45E-89 | 0.3078945 | 0.116 | 0.032 | 5.92E-85 | 2.5 | HMGCLL1    | 3.625       |
| ADGRL34        | 3.29E-89 | 0.4180559 | 0.224 | 0.092 | 7.93E-85 | 2.5 | ADGRL3     | 2.434782609 |
| CAMKMT2        | 5.11E-89 | 0.4668388 | 0.311 | 0.153 | 1.23E-84 | 2.5 | CAMKMT     | 2.032679739 |
| N4BP2L23       | 6.03E-89 | 0.3682074 | 0.883 | 0.703 | 1.45E-84 | 2.5 | N4BP2L2    | 1.256045519 |
| TEX21          | 9.66E-89 | 0.392282  | 0.214 | 0.087 | 2.33E-84 | 2.5 | TEX2       | 2.459770115 |
| PPP3CA4        | 1.42E-88 | 0.3966575 | 0.751 | 0.537 | 3.42E-84 | 2.5 | PPP3CA     | 1.398510242 |
| ZNF911         | 1.68E-88 | 0.4550431 | 0.362 | 0.193 | 4.05E-84 | 2.5 | ZNF91      | 1.875647668 |
| ITPR13         | 2.01E-88 | 0.3685346 | 0.214 | 0.086 | 4.86E-84 | 2.5 | ITPR1      | 2.488372093 |
| TRAPPC93       | 2.60E-88 | 0.4129673 | 0.357 | 0.187 | 6.28E-84 | 2.5 | TRAPPC9    | 1.909090909 |
| HSBP13         | 3.43E-88 | 0.4688045 | 0.709 | 0.533 | 8.28E-84 | 2.5 | HSBP1      | 1.330206379 |
| ASCC32         | 6.25E-88 | 0.45737   | 0.4   | 0.222 | 1.51E-83 | 2.5 | ASCC3      | 1.801801802 |
| RP11-624L4.12  | 6.64E-88 | 0.4218804 | 0.153 | 0.051 | 1.60E-83 | 2.5 | RP11-624L4 | 3           |
| FXYD34         | 7.01E-88 | 0.5213624 | 0.775 | 0.614 | 1.69E-83 | 2.5 | FXYD3      | 1.262214984 |
| TNS41          | 1.71E-87 | 0.3110346 | 0.113 | 0.031 | 4.12E-83 | 2.5 | TNS4       | 3.64516129  |
| DDX55          | 1.80E-87 | 0.4260242 | 0.684 | 0.472 | 4.34E-83 | 2.5 | DDX5       | 1.449152542 |
| C15orf482      | 3.06E-87 | 0.2813489 | 0.697 | 0.47  | 7.39E-83 | 2.5 | C15orf48   | 1.482978723 |
| TBL1X1         | 1.23E-86 | 0.4473905 | 0.365 | 0.196 | 2.97E-82 | 2.5 | TBL1X      | 1.862244898 |
| CD594          | 4.49E-86 | 0.4557284 | 0.958 | 0.871 | 1.08E-81 | 2.5 | CD59       | 1.099885189 |
| SCMH13         | 4.85E-86 | 0.4352407 | 0.393 | 0.217 | 1.17E-81 | 2.5 | SCMH1      | 1.811059908 |
| SESN12         | 6.14E-86 | 0.4006443 | 0.239 | 0.104 | 1.48E-81 | 2.5 | SESN1      | 2.298076923 |
| HLA-C1         | 7.38E-86 | 0.463782  | 0.48  | 0.29  | 1.78E-81 | 2.5 | HLA-C      | 1.655172414 |
| C5orf171       | 1.51E-85 | 0.4700135 | 0.232 | 0.1   | 3.63E-81 | 2.5 | C5orf17    | 2.32        |
| HES12          | 1.52E-85 | 0.4227268 | 0.513 | 0.319 | 3.67E-81 | 2.5 | HES1       | 1.60815047  |
| AMPH4          | 2.36E-85 | 0.3275356 | 0.213 | 0.085 | 5.69E-81 | 2.5 | AMPH       | 2.505882353 |
| DHRS31         | 6.26E-85 | 0.3929307 | 0.229 | 0.099 | 1.51E-80 | 2.5 | DHRS3      | 2.313131313 |
| FAM102A1       | 2.55E-84 | 0.3733726 | 0.263 | 0.121 | 6.14E-80 | 2.5 | FAM102A    | 2.173553719 |
| FAM214A2       | 6.88E-84 | 0.3753309 | 0.391 | 0.212 | 1.66E-79 | 2.5 | FAM214A    | 1.844339623 |
| ABHD17C2       | 7.99E-84 | 0.3830766 | 0.205 | 0.084 | 1.93E-79 | 2.5 | ABHD17C    | 2.44047619  |
| RAB121         | 1.92E-83 | 0.4814321 | 0.416 | 0.24  | 4.63E-79 | 2.5 | RAB12      | 1.733333333 |
| EFTUD11        | 1.99E-83 | 0.4162683 | 0.285 | 0.138 | 4.81E-79 | 2.5 | EFTUD1     | 2.065217391 |
| FBXL71         | 3.43E-83 | 0.3729309 | 0.104 | 0.028 | 8.28E-79 | 2.5 | FBXL7      | 3.714285714 |
| PON21          | 3.73E-83 | 0.3318769 | 0.196 | 0.078 | 9.00E-79 | 2.5 | PON2       | 2.512820513 |
| TGFBI1         | 4.34E-83 | 0.2423314 | 0.085 | 0.019 | 1.05E-78 | 2.5 | TGFBI      | 4.473684211 |
| RAD51B2        | 1.47E-82 | 0.5372536 | 0.376 | 0.211 | 3.54E-78 | 2.5 | RAD51B     | 1.781990521 |
| TGM22          | 1.94E-82 | 0.4143169 | 0.2   | 0.083 | 4.68E-78 | 2.5 | TGM2       | 2.409638554 |
| ESRRG          | 2.31E-82 | 0.3640667 | 0.136 | 0.044 | 5.58E-78 | 2.5 | ESRRG      | 3.090909091 |
| HPX4           | 3.14E-82 | 0.457305  | 0.369 | 0.194 | 7.58E-78 | 2.5 | HPX        | 1.902061856 |
| GPD22          | 3.61E-82 | 0.3757943 | 0.504 | 0.307 | 8.70E-78 | 2.5 | GPD2       | 1.641693811 |
| KIAA13244      | 6.47E-82 | 0.4297811 | 0.38  | 0.207 | 1.56E-77 | 2.5 | KIAA1324   | 1.835748792 |
| FGD62          | 7.18E-82 | 0.4241196 | 0.516 | 0.32  | 1.73E-77 | 2.5 | FGD6       | 1.6125      |
| TMEM106B1      | 7.20E-82 | 0.3881751 | 0.281 | 0.134 | 1.74E-77 | 2.5 | TMEM106B   | 2.097014925 |
| TMEM178B1      | 1.82E-81 | 0.3567493 | 0.169 | 0.063 | 4.39E-77 | 2.5 | TMEM178B   | 2.682539683 |
| KAZN1          | 1.99E-81 | 0.4044632 | 0.367 | 0.197 | 4.80E-77 | 2.5 | KAZN       | 1.862944162 |
| NOP103         | 5.23E-81 | 0.4099864 | 0.718 | 0.534 | 1.26E-76 | 2.5 | NOP10      | 1.344569288 |



|                |          |           |       |       |          |     |            |             |
|----------------|----------|-----------|-------|-------|----------|-----|------------|-------------|
| NDUFAF62       | 7.42E-81 | 0.3531483 | 0.21  | 0.088 | 1.79E-76 | 2.5 | NDUFAF6    | 2.386363636 |
| IFNGR11        | 1.60E-80 | 0.437649  | 0.426 | 0.25  | 3.86E-76 | 2.5 | IFNGR1     | 1.704       |
| FAM63B1        | 1.78E-80 | 0.4076659 | 0.33  | 0.174 | 4.29E-76 | 2.5 | FAM63B     | 1.896551724 |
| RASSF62        | 1.94E-80 | 0.2819849 | 0.16  | 0.057 | 4.67E-76 | 2.5 | RASSF6     | 2.807017544 |
| TREM11         | 2.17E-80 | 0.2385808 | 0.068 | 0.013 | 5.23E-76 | 2.5 | TREM1      | 5.230769231 |
| LYPD62         | 2.26E-80 | 0.279117  | 0.13  | 0.041 | 5.44E-76 | 2.5 | LYPD6      | 3.170731707 |
| CROT1          | 2.98E-80 | 0.2633804 | 0.118 | 0.035 | 7.18E-76 | 2.5 | CROT       | 3.371428571 |
| RSRC12         | 4.93E-80 | 0.4066453 | 0.445 | 0.264 | 1.19E-75 | 2.5 | RSRC1      | 1.685606061 |
| STYK14         | 6.45E-80 | 0.2762539 | 0.155 | 0.054 | 1.56E-75 | 2.5 | STYK1      | 2.87037037  |
| RP11-141M1.3   | 6.56E-80 | 0.4404248 | 0.198 | 0.082 | 1.58E-75 | 2.5 | RP11-141M  | 2.414634146 |
| VPS13C2        | 8.71E-80 | 0.4058551 | 0.394 | 0.222 | 2.10E-75 | 2.5 | VPS13C     | 1.774774775 |
| ZIM21          | 1.04E-79 | 0.2067575 | 0.068 | 0.013 | 2.51E-75 | 2.5 | ZIM2       | 5.230769231 |
| MAP4K32        | 1.26E-79 | 0.3985498 | 0.413 | 0.236 | 3.05E-75 | 2.5 | MAP4K3     | 1.75        |
| RELL11         | 2.48E-79 | 0.346109  | 0.233 | 0.103 | 5.97E-75 | 2.5 | RELL1      | 2.262135922 |
| PTPRG4         | 4.12E-79 | 0.4371975 | 0.435 | 0.254 | 9.93E-75 | 2.5 | PTPRG      | 1.712598425 |
| PAPSS2         | 6.37E-79 | 0.2766996 | 0.092 | 0.023 | 1.53E-74 | 2.5 | PAPSS2     | 4           |
| CMTM41         | 1.44E-78 | 0.3936253 | 0.275 | 0.134 | 3.47E-74 | 2.5 | CMTM4      | 2.052238806 |
| BATF4          | 2.30E-78 | 0.3197267 | 0.166 | 0.061 | 5.56E-74 | 2.5 | BATF       | 2.721311475 |
| AC011288.21    | 2.98E-78 | 0.4278892 | 0.145 | 0.05  | 7.20E-74 | 2.5 | AC011288.  | 2.9         |
| NRXN34         | 5.16E-78 | 0.3430345 | 0.246 | 0.111 | 1.24E-73 | 2.5 | NRXN3      | 2.216216216 |
| MTIF33         | 7.01E-78 | 0.4151332 | 0.425 | 0.251 | 1.69E-73 | 2.5 | MTIF3      | 1.693227092 |
| VTI1A2         | 1.64E-77 | 0.3623326 | 0.341 | 0.182 | 3.95E-73 | 2.5 | VTI1A      | 1.873626374 |
| RP11-1028N23.4 | 2.15E-77 | 0.1486408 | 0.042 | 0.005 | 5.19E-73 | 2.5 | RP11-1028N | 8.4         |
| TCF122         | 2.24E-77 | 0.360534  | 0.761 | 0.57  | 5.41E-73 | 2.5 | TCF12      | 1.335087719 |
| CEBPB2         | 2.52E-77 | 0.4017072 | 0.298 | 0.152 | 6.09E-73 | 2.5 | CEBPB      | 1.960526316 |
| UQCR103        | 6.63E-77 | 0.3366453 | 0.681 | 0.484 | 1.60E-72 | 2.5 | UQCR10     | 1.407024793 |
| STC11          | 1.78E-76 | 0.3670207 | 0.121 | 0.038 | 4.28E-72 | 2.5 | STC1       | 3.184210526 |
| TNRC6B2        | 1.85E-76 | 0.3769906 | 0.663 | 0.463 | 4.45E-72 | 2.5 | TNRC6B     | 1.431965443 |
| KCTD15         | 2.21E-76 | 0.3246221 | 0.154 | 0.056 | 5.32E-72 | 2.5 | KCTD1      | 2.75        |
| DYNLT32        | 3.87E-76 | 0.393217  | 0.424 | 0.249 | 9.33E-72 | 2.5 | DYNLT3     | 1.702811245 |
| LNX11          | 7.66E-76 | 0.3866584 | 0.248 | 0.117 | 1.85E-71 | 2.5 | LNX1       | 2.11965812  |
| STPG21         | 1.22E-75 | 0.3727281 | 0.171 | 0.067 | 2.94E-71 | 2.5 | STPG2      | 2.552238806 |
| ANO102         | 1.68E-75 | 0.4188436 | 0.425 | 0.253 | 4.05E-71 | 2.5 | ANO10      | 1.679841897 |
| LINC005044     | 1.86E-75 | 0.3805138 | 0.188 | 0.076 | 4.48E-71 | 2.5 | LINC00504  | 2.473684211 |
| KAT6B3         | 2.50E-75 | 0.3874975 | 0.411 | 0.235 | 6.02E-71 | 2.5 | KAT6B      | 1.74893617  |
| MLPH3          | 4.18E-75 | 0.2573982 | 0.163 | 0.061 | 1.01E-70 | 2.5 | MLPH       | 2.672131148 |
| PLGRKT2        | 5.55E-75 | 0.2888382 | 0.172 | 0.067 | 1.34E-70 | 2.5 | PLGRKT     | 2.567164179 |
| SCARB22        | 6.20E-75 | 0.3554537 | 0.312 | 0.162 | 1.49E-70 | 2.5 | SCARB2     | 1.925925926 |
| RNF1521        | 1.27E-74 | 0.3375719 | 0.191 | 0.079 | 3.06E-70 | 2.5 | RNF152     | 2.417721519 |
| ITM2B4         | 1.96E-74 | 0.4138529 | 0.509 | 0.328 | 4.73E-70 | 2.5 | ITM2B      | 1.551829268 |
| PKM2           | 1.99E-74 | 0.4270485 | 0.517 | 0.33  | 4.80E-70 | 2.5 | PKM        | 1.566666667 |
| BZW21          | 2.36E-74 | 0.3447782 | 0.258 | 0.124 | 5.69E-70 | 2.5 | BZW2       | 2.080645161 |
| MEGF94         | 2.47E-74 | 0.3161091 | 0.251 | 0.117 | 5.95E-70 | 2.5 | MEGF9      | 2.145299145 |
| APPL21         | 2.73E-74 | 0.3428079 | 0.215 | 0.095 | 6.59E-70 | 2.5 | APPL2      | 2.263157895 |
| SLC38A13       | 3.99E-74 | 0.3925924 | 0.562 | 0.369 | 9.63E-70 | 2.5 | SLC38A1    | 1.52303523  |
| PREX14         | 8.01E-74 | 0.2878991 | 0.13  | 0.043 | 1.93E-69 | 2.5 | PREX1      | 3.023255814 |
| ACTR3C2        | 8.11E-74 | 0.2846217 | 0.127 | 0.043 | 1.96E-69 | 2.5 | ACTR3C     | 2.953488372 |
| ARHGEF123      | 1.09E-73 | 0.3529063 | 0.747 | 0.553 | 2.64E-69 | 2.5 | ARHGEF12   | 1.350813743 |
| MAP2K52        | 1.57E-73 | 0.3815204 | 0.24  | 0.114 | 3.79E-69 | 2.5 | MAP2K5     | 2.105263158 |
| WDR703         | 3.05E-73 | 0.3632503 | 0.264 | 0.129 | 7.34E-69 | 2.5 | WDR70      | 2.046511628 |
| ST3GAL41       | 3.86E-73 | 0.2882114 | 0.153 | 0.056 | 9.32E-69 | 2.5 | ST3GAL4    | 2.732142857 |
| BZW12          | 5.21E-73 | 0.3772398 | 0.43  | 0.256 | 1.26E-68 | 2.5 | BZW1       | 1.6796875   |

|              |          |           |       |       |          |     |            |             |
|--------------|----------|-----------|-------|-------|----------|-----|------------|-------------|
| ATP10A1      | 1.50E-72 | 0.2725561 | 0.111 | 0.034 | 3.62E-68 | 2.5 | ATP10A     | 3.264705882 |
| EMC33        | 2.26E-72 | 0.3797471 | 0.38  | 0.217 | 5.44E-68 | 2.5 | EMC3       | 1.751152074 |
| PLEKHF22     | 2.92E-72 | 0.3542665 | 0.202 | 0.088 | 7.03E-68 | 2.5 | PLEKHF2    | 2.295454545 |
| ARID1B3      | 3.69E-72 | 0.3327797 | 0.672 | 0.47  | 8.91E-68 | 2.5 | ARID1B     | 1.429787234 |
| FAIM2        | 4.17E-72 | 0.1603715 | 0.045 | 0.006 | 1.01E-67 | 2.5 | FAIM2      | 7.5         |
| PTHLH4       | 5.35E-72 | 0.2850031 | 0.393 | 0.214 | 1.29E-67 | 2.5 | PTHLH      | 1.836448598 |
| CA122        | 6.53E-72 | 0.4444224 | 0.451 | 0.276 | 1.57E-67 | 2.5 | CA12       | 1.634057971 |
| FUT84        | 8.55E-72 | 0.2560386 | 0.421 | 0.238 | 2.06E-67 | 2.5 | FUT8       | 1.768907563 |
| ELOVL53      | 1.25E-71 | 0.2363268 | 0.465 | 0.272 | 3.02E-67 | 2.5 | ELOVL5     | 1.709558824 |
| DNAJC110     | 1.45E-71 | 0.4051167 | 0.409 | 0.242 | 3.51E-67 | 2.5 | DNAJC1     | 1.690082645 |
| CGNL13       | 1.53E-71 | 0.4779518 | 0.319 | 0.173 | 3.69E-67 | 2.5 | CGNL1      | 1.843930636 |
| SPINT11      | 1.67E-71 | 0.3951059 | 0.311 | 0.166 | 4.03E-67 | 2.5 | SPINT1     | 1.873493976 |
| FGF143       | 1.96E-71 | 0.5580867 | 0.18  | 0.074 | 4.72E-67 | 2.5 | FGF14      | 2.432432432 |
| CRY2         | 2.15E-71 | 0.3456496 | 0.202 | 0.089 | 5.18E-67 | 2.5 | CRY2       | 2.269662921 |
| AGR24        | 3.29E-71 | 0.3507331 | 0.404 | 0.222 | 7.94E-67 | 2.5 | AGR2       | 1.81981982  |
| ULK42        | 4.67E-71 | 0.3116915 | 0.221 | 0.1   | 1.13E-66 | 2.5 | ULK4       | 2.21        |
| PCSK62       | 7.68E-71 | 0.2548111 | 0.107 | 0.032 | 1.85E-66 | 2.5 | PCSK6      | 3.34375     |
| MKL22        | 7.93E-71 | 0.3848266 | 0.471 | 0.296 | 1.91E-66 | 2.5 | MKL2       | 1.591216216 |
| TFF34        | 8.09E-71 | 0.3206347 | 0.137 | 0.048 | 1.95E-66 | 2.5 | TFF3       | 2.854166667 |
| FHL23        | 9.53E-71 | 0.373408  | 0.298 | 0.155 | 2.30E-66 | 2.5 | FHL2       | 1.922580645 |
| USP310       | 1.29E-70 | 0.3902148 | 0.45  | 0.279 | 3.12E-66 | 2.5 | USP3       | 1.612903226 |
| RERE4        | 1.45E-70 | 0.2863371 | 0.744 | 0.546 | 3.51E-66 | 2.5 | RERE       | 1.362637363 |
| SP1001       | 3.21E-70 | 0.350224  | 0.275 | 0.14  | 7.73E-66 | 2.5 | SP100      | 1.964285714 |
| MGAT4A1      | 4.19E-70 | 0.3365549 | 0.184 | 0.078 | 1.01E-65 | 2.5 | MGAT4A     | 2.358974359 |
| LARGE3       | 1.44E-68 | 0.3492872 | 0.488 | 0.305 | 3.48E-64 | 2.5 | LARGE      | 1.6         |
| MYOF2        | 2.22E-68 | 0.3653376 | 0.751 | 0.578 | 5.35E-64 | 2.5 | MYOF       | 1.299307958 |
| EPAS12       | 2.51E-68 | 0.3529322 | 0.27  | 0.136 | 6.05E-64 | 2.5 | EPAS1      | 1.985294118 |
| ZCCHC71      | 6.98E-68 | 0.3998243 | 0.582 | 0.402 | 1.68E-63 | 2.5 | ZCCHC7     | 1.447761194 |
| EXOC22       | 8.89E-68 | 0.3230874 | 0.252 | 0.124 | 2.14E-63 | 2.5 | EXOC2      | 2.032258065 |
| KIAA08253    | 1.03E-67 | 0.2982771 | 0.19  | 0.082 | 2.48E-63 | 2.5 | KIAA0825   | 2.317073171 |
| AC007319.14  | 1.09E-67 | 0.2894762 | 0.183 | 0.077 | 2.63E-63 | 2.5 | AC007319.  | 2.376623377 |
| BAZ2B2       | 2.26E-67 | 0.382085  | 0.638 | 0.458 | 5.45E-63 | 2.5 | BAZ2B      | 1.3930131   |
| PCM13        | 5.06E-67 | 0.3763482 | 0.399 | 0.239 | 1.22E-62 | 2.5 | PCM1       | 1.669456067 |
| USP402       | 5.23E-67 | 0.2951622 | 0.159 | 0.064 | 1.26E-62 | 2.5 | USP40      | 2.484375    |
| HACD33       | 6.89E-67 | 0.3193472 | 0.236 | 0.114 | 1.66E-62 | 2.5 | HACD3      | 2.070175439 |
| RP13-726E6.2 | 7.06E-67 | 0.2892258 | 0.149 | 0.058 | 1.70E-62 | 2.5 | RP13-726E6 | 2.568965517 |
| ADCY91       | 2.20E-66 | 0.2892344 | 0.135 | 0.049 | 5.30E-62 | 2.5 | ADCY9      | 2.755102041 |
| CACNA2D14    | 4.72E-66 | 0.3118515 | 0.278 | 0.141 | 1.14E-61 | 2.5 | CACNA2D1   | 1.971631206 |
| MS4A142      | 6.77E-66 | 0.1788168 | 0.068 | 0.015 | 1.63E-61 | 2.5 | MS4A14     | 4.533333333 |
| ZNF420       | 7.14E-66 | 0.2353524 | 0.107 | 0.034 | 1.72E-61 | 2.5 | ZNF420     | 3.147058824 |
| TACSTD22     | 7.68E-66 | 0.3037749 | 0.87  | 0.71  | 1.85E-61 | 2.5 | TACSTD2    | 1.225352113 |
| AHI11        | 1.56E-65 | 0.3773205 | 0.404 | 0.242 | 3.75E-61 | 2.5 | AHI1       | 1.669421488 |
| SLC39A64     | 1.99E-65 | 0.2939498 | 0.461 | 0.281 | 4.80E-61 | 2.5 | SLC39A6    | 1.640569395 |
| MRPL271      | 2.47E-65 | 0.3553577 | 0.305 | 0.168 | 5.95E-61 | 2.5 | MRPL27     | 1.81547619  |
| MBTPS12      | 2.88E-65 | 0.290718  | 0.215 | 0.1   | 6.96E-61 | 2.5 | MBTPS1     | 2.15        |
| PARP91       | 6.10E-65 | 0.2810865 | 0.15  | 0.059 | 1.47E-60 | 2.5 | PARP9      | 2.542372881 |
| VEGFC1       | 9.82E-65 | 0.2407786 | 0.132 | 0.047 | 2.37E-60 | 2.5 | VEGFC      | 2.808510638 |
| MRPS61       | 1.08E-64 | 0.3673357 | 0.427 | 0.261 | 2.60E-60 | 2.5 | MRPS6      | 1.636015326 |
| RBL21        | 1.41E-64 | 0.3359262 | 0.231 | 0.113 | 3.41E-60 | 2.5 | RBL2       | 2.044247788 |
| RABEP11      | 3.20E-64 | 0.3248737 | 0.277 | 0.144 | 7.73E-60 | 2.5 | RABEP1     | 1.923611111 |
| MBNL23       | 4.33E-64 | 0.3136655 | 0.702 | 0.521 | 1.04E-59 | 2.5 | MBNL2      | 1.347408829 |
| C2CD4A4      | 5.13E-64 | 0.2291778 | 0.116 | 0.039 | 1.24E-59 | 2.5 | C2CD4A     | 2.974358974 |

|             |          |           |       |       |          |     |          |             |
|-------------|----------|-----------|-------|-------|----------|-----|----------|-------------|
| PROM24      | 5.33E-64 | 0.2489796 | 0.118 | 0.04  | 1.28E-59 | 2.5 | PROM2    | 2.95        |
| NRF11       | 9.36E-64 | 0.3471576 | 0.288 | 0.155 | 2.26E-59 | 2.5 | NRF1     | 1.858064516 |
| FHIT1       | 1.09E-63 | 0.4342891 | 0.501 | 0.337 | 2.63E-59 | 2.5 | FHIT     | 1.486646884 |
| REMG2       | 1.26E-63 | 0.4205108 | 0.321 | 0.18  | 3.04E-59 | 2.5 | REMG     | 1.783333333 |
| CPEB43      | 1.43E-63 | 0.3616588 | 0.401 | 0.242 | 3.46E-59 | 2.5 | CPEB4    | 1.657024793 |
| BRWD12      | 1.44E-63 | 0.3502537 | 0.53  | 0.352 | 3.48E-59 | 2.5 | BRWD1    | 1.505681818 |
| SRI1        | 1.48E-63 | 0.3457597 | 0.186 | 0.082 | 3.56E-59 | 2.5 | SRI      | 2.268292683 |
| MT-ND32     | 1.59E-63 | 0.3022077 | 0.998 | 0.985 | 3.82E-59 | 2.5 | MT-ND3   | 1.01319797  |
| UVRAG3      | 1.69E-63 | 0.3559064 | 0.627 | 0.442 | 4.08E-59 | 2.5 | UVRAG    | 1.418552036 |
| MYO9A2      | 2.26E-63 | 0.3494705 | 0.466 | 0.297 | 5.44E-59 | 2.5 | MYO9A    | 1.569023569 |
| RHOBTB34    | 2.78E-63 | 0.3084284 | 0.24  | 0.118 | 6.70E-59 | 2.5 | RHOBTB3  | 2.033898305 |
| AC008937.22 | 3.75E-63 | 0.2420104 | 0.119 | 0.041 | 9.03E-59 | 2.5 | AC008937 | 2.902439024 |
| LAMA32      | 3.85E-63 | 0.2969959 | 0.325 | 0.176 | 9.29E-59 | 2.5 | LAMA3    | 1.846590909 |
| SRGAP2B1    | 5.65E-63 | 0.2757286 | 0.171 | 0.072 | 1.36E-58 | 2.5 | SRGAP2B  | 2.375       |
| SLC44A5     | 5.98E-63 | 0.2102701 | 0.072 | 0.018 | 1.44E-58 | 2.5 | SLC44A5  | 4           |
| CERS22      | 6.16E-63 | 0.2372385 | 0.129 | 0.047 | 1.49E-58 | 2.5 | CERS2    | 2.744680851 |
| UBR22       | 8.02E-63 | 0.3991405 | 0.541 | 0.368 | 1.94E-58 | 2.5 | UBR2     | 1.470108696 |
| ARFGEF33    | 8.29E-63 | 0.3795809 | 0.417 | 0.256 | 2.00E-58 | 2.5 | ARFGEF3  | 1.62890625  |
| TANC12      | 1.03E-62 | 0.3432995 | 0.498 | 0.328 | 2.48E-58 | 2.5 | TANC1    | 1.518292683 |
| GNAS4       | 1.34E-62 | 0.2620738 | 0.883 | 0.734 | 3.22E-58 | 2.5 | GNAS     | 1.202997275 |
| DNAH54      | 1.58E-62 | 0.2460568 | 0.147 | 0.057 | 3.81E-58 | 2.5 | DNAH5    | 2.578947368 |
| SLC39A111   | 1.69E-62 | 0.3070602 | 0.204 | 0.095 | 4.08E-58 | 2.5 | SLC39A11 | 2.147368421 |
| PKP43       | 2.33E-62 | 0.3890596 | 0.655 | 0.482 | 5.61E-58 | 2.5 | PKP4     | 1.358921162 |
| DENND1B2    | 3.00E-62 | 0.3436736 | 0.256 | 0.132 | 7.23E-58 | 2.5 | DENND1B  | 1.939393939 |
| EFCAB6      | 3.84E-62 | 0.1922636 | 0.081 | 0.022 | 9.25E-58 | 2.5 | EFCAB6   | 3.681818182 |
| FOSL21      | 4.08E-62 | 0.3778275 | 0.374 | 0.224 | 9.85E-58 | 2.5 | FOSL2    | 1.669642857 |
| RALGAPA12   | 4.67E-62 | 0.3814018 | 0.449 | 0.285 | 1.13E-57 | 2.5 | RALGAPA1 | 1.575438596 |
| FANK13      | 6.71E-62 | 0.2858011 | 0.264 | 0.135 | 1.62E-57 | 2.5 | FANK1    | 1.955555556 |
| MICU21      | 1.84E-61 | 0.3345702 | 0.287 | 0.155 | 4.45E-57 | 2.5 | MICU2    | 1.851612903 |
| TRAFD12     | 3.57E-61 | 0.2546822 | 0.308 | 0.167 | 8.61E-57 | 2.5 | TRAFD1   | 1.844311377 |
| TTC282      | 3.83E-61 | 0.3353591 | 0.278 | 0.147 | 9.23E-57 | 2.5 | TTC28    | 1.891156463 |
| ZNF6082     | 5.88E-61 | 0.3656801 | 0.295 | 0.164 | 1.42E-56 | 2.5 | ZNF608   | 1.798780488 |
| INTS101     | 6.00E-61 | 0.3674701 | 0.234 | 0.118 | 1.45E-56 | 2.5 | INTS10   | 1.983050847 |
| FAM213A3    | 6.39E-61 | 0.3095925 | 0.22  | 0.107 | 1.54E-56 | 2.5 | FAM213A  | 2.056074766 |
| CAB39L1     | 1.70E-60 | 0.3211451 | 0.279 | 0.149 | 4.10E-56 | 2.5 | CAB39L   | 1.872483221 |
| DLEU22      | 2.06E-60 | 0.4443721 | 0.345 | 0.205 | 4.96E-56 | 2.5 | DLEU2    | 1.682926829 |
| AC007246.31 | 2.06E-60 | 0.252863  | 0.109 | 0.037 | 4.97E-56 | 2.5 | AC007246 | 2.945945946 |
| CXCL61      | 2.17E-60 | 0.5829778 | 0.143 | 0.057 | 5.23E-56 | 2.5 | CXCL6    | 2.50877193  |
| RPS6KA21    | 3.42E-60 | 0.300148  | 0.285 | 0.153 | 8.24E-56 | 2.5 | RPS6KA2  | 1.862745098 |
| ANKRD441    | 4.05E-60 | 0.253751  | 0.159 | 0.066 | 9.76E-56 | 2.5 | ANKRD44  | 2.409090909 |
| DMGDH1      | 4.96E-60 | 0.2662154 | 0.111 | 0.038 | 1.20E-55 | 2.5 | DMGDH    | 2.921052632 |
| TMEM594     | 8.04E-60 | 0.3252763 | 0.609 | 0.431 | 1.94E-55 | 2.5 | TMEM59   | 1.412993039 |
| STX81       | 1.08E-59 | 0.3728805 | 0.357 | 0.214 | 2.59E-55 | 2.5 | STX8     | 1.668224299 |
| CDON1       | 1.14E-59 | 0.2586804 | 0.113 | 0.04  | 2.76E-55 | 2.5 | CDON     | 2.825       |
| NAMPT2      | 1.48E-59 | 0.3812887 | 0.775 | 0.631 | 3.57E-55 | 2.5 | NAMPT    | 1.228209192 |
| ARSG        | 1.85E-59 | 0.2283481 | 0.108 | 0.037 | 4.46E-55 | 2.5 | ARSG     | 2.918918919 |
| UCP23       | 2.52E-59 | 0.1948789 | 0.089 | 0.026 | 6.09E-55 | 2.5 | UCP2     | 3.423076923 |
| TUBA1A3     | 2.62E-59 | 0.6267349 | 0.374 | 0.238 | 6.33E-55 | 2.5 | TUBA1A   | 1.571428571 |
| WHSC1L12    | 3.19E-59 | 0.3279821 | 0.394 | 0.242 | 7.68E-55 | 2.5 | WHSC1L1  | 1.628099174 |
| SIPA1L32    | 3.88E-59 | 0.2597471 | 0.341 | 0.196 | 9.36E-55 | 2.5 | SIPA1L3  | 1.739795918 |
| SLTM1       | 5.12E-59 | 0.3689356 | 0.431 | 0.276 | 1.23E-54 | 2.5 | SLTM     | 1.561594203 |
| STAT5B2     | 5.50E-59 | 0.3205547 | 0.481 | 0.312 | 1.33E-54 | 2.5 | STAT5B   | 1.541666667 |

|                |          |           |       |       |          |     |           |             |
|----------------|----------|-----------|-------|-------|----------|-----|-----------|-------------|
| PGM2L13        | 5.94E-59 | 0.2901254 | 0.369 | 0.215 | 1.43E-54 | 2.5 | PGM2L1    | 1.71627907  |
| CHMP53         | 7.48E-59 | 0.3649955 | 0.585 | 0.416 | 1.80E-54 | 2.5 | CHMP5     | 1.40625     |
| LYPD32         | 7.56E-59 | 0.2253116 | 0.138 | 0.054 | 1.82E-54 | 2.5 | LYPD3     | 2.555555556 |
| LCOR2          | 8.36E-59 | 0.3116494 | 0.404 | 0.247 | 2.02E-54 | 2.5 | LCOR      | 1.63562753  |
| SLC30A91       | 1.16E-58 | 0.3333241 | 0.261 | 0.138 | 2.79E-54 | 2.5 | SLC30A9   | 1.891304348 |
| NNMT1          | 1.25E-58 | 0.3375478 | 0.202 | 0.095 | 3.02E-54 | 2.5 | NNMT      | 2.126315789 |
| PLAU1          | 1.92E-58 | 0.3277796 | 0.176 | 0.078 | 4.62E-54 | 2.5 | PLAU      | 2.256410256 |
| ITGB62         | 2.00E-58 | 0.3651469 | 0.532 | 0.363 | 4.82E-54 | 2.5 | ITGB6     | 1.465564738 |
| RP4-601P9.22   | 2.82E-58 | 0.1631553 | 0.052 | 0.01  | 6.80E-54 | 2.5 | RP4-601P9 | 5.2         |
| NFIC2          | 3.68E-58 | 0.3553994 | 0.3   | 0.17  | 8.87E-54 | 2.5 | NFIC      | 1.764705882 |
| OBFC11         | 4.98E-58 | 0.2541078 | 0.149 | 0.061 | 1.20E-53 | 2.5 | OBFC1     | 2.442622951 |
| USP392         | 7.07E-58 | 0.3922567 | 0.476 | 0.318 | 1.71E-53 | 2.5 | USP39     | 1.496855346 |
| P4HA12         | 9.16E-58 | 0.2894426 | 0.541 | 0.364 | 2.21E-53 | 2.5 | P4HA1     | 1.486263736 |
| NR1D21         | 9.46E-58 | 0.3435702 | 0.362 | 0.218 | 2.28E-53 | 2.5 | NR1D2     | 1.660550459 |
| BCAM2          | 9.64E-58 | 0.1918576 | 0.081 | 0.023 | 2.32E-53 | 2.5 | BCAM      | 3.52173913  |
| ZBTB163        | 1.03E-57 | 0.4340345 | 0.404 | 0.259 | 2.48E-53 | 2.5 | ZBTB16    | 1.55984556  |
| HPS31          | 1.44E-57 | 0.2118341 | 0.104 | 0.036 | 3.48E-53 | 2.5 | HPS3      | 2.888888889 |
| LYST2          | 1.89E-57 | 0.3012625 | 0.414 | 0.254 | 4.56E-53 | 2.5 | LYST      | 1.62992126  |
| CTC-236F12.41  | 2.06E-57 | 0.1561953 | 0.056 | 0.012 | 4.97E-53 | 2.5 | CTC-236F1 | 4.666666667 |
| SP1101         | 2.25E-57 | 0.1772113 | 0.074 | 0.02  | 5.44E-53 | 2.5 | SP110     | 3.7         |
| BTG22          | 2.43E-57 | 0.2272903 | 0.133 | 0.052 | 5.85E-53 | 2.5 | BTG2      | 2.557692308 |
| PTPRF1         | 2.52E-57 | 0.2886611 | 0.219 | 0.109 | 6.07E-53 | 2.5 | PTPRF     | 2.009174312 |
| CFAP693        | 3.04E-57 | 0.2832423 | 0.198 | 0.093 | 7.34E-53 | 2.5 | CFAP69    | 2.129032258 |
| SMCHD13        | 3.46E-57 | 0.3241373 | 0.561 | 0.386 | 8.33E-53 | 2.5 | SMCHD1    | 1.453367876 |
| CST34          | 4.85E-57 | 0.2593346 | 0.141 | 0.057 | 1.17E-52 | 2.5 | CST3      | 2.473684211 |
| UBR11          | 4.86E-57 | 0.315917  | 0.252 | 0.134 | 1.17E-52 | 2.5 | UBR1      | 1.880597015 |
| FAM151B1       | 5.26E-57 | 0.2349602 | 0.139 | 0.056 | 1.27E-52 | 2.5 | FAM151B   | 2.482142857 |
| EFCAB11        | 5.44E-57 | 0.2252927 | 0.096 | 0.031 | 1.31E-52 | 2.5 | EFCAB11   | 3.096774194 |
| ACBD62         | 7.46E-57 | 0.2706943 | 0.16  | 0.069 | 1.80E-52 | 2.5 | ACBD6     | 2.31884058  |
| ERO1A2         | 7.49E-57 | 0.2956588 | 0.596 | 0.418 | 1.81E-52 | 2.5 | ERO1A     | 1.425837321 |
| USP253         | 1.05E-56 | 0.2850423 | 0.396 | 0.241 | 2.53E-52 | 2.5 | USP25     | 1.643153527 |
| RP11-434D9.11  | 1.86E-56 | 0.2417156 | 0.078 | 0.022 | 4.48E-52 | 2.5 | RP11-434D | 3.545454545 |
| SARAF4         | 2.21E-56 | 0.3319684 | 0.497 | 0.333 | 5.32E-52 | 2.5 | SARAF     | 1.492492492 |
| STK392         | 2.33E-56 | 0.1243899 | 0.379 | 0.22  | 5.61E-52 | 2.5 | STK39     | 1.722727273 |
| ZNF7041        | 3.45E-56 | 0.2931811 | 0.276 | 0.149 | 8.32E-52 | 2.5 | ZNF704    | 1.852348993 |
| DNAH141        | 3.54E-56 | 0.2922832 | 0.183 | 0.085 | 8.54E-52 | 2.5 | DNAH14    | 2.152941176 |
| SPATA62        | 5.14E-56 | 0.2384318 | 0.125 | 0.048 | 1.24E-51 | 2.5 | SPATA6    | 2.604166667 |
| RP11-776H12.11 | 6.77E-56 | 0.1123589 | 0.032 | 0.004 | 1.63E-51 | 2.5 | RP11-776H | 8           |
| MYO5C1         | 9.20E-56 | 0.2843741 | 0.258 | 0.138 | 2.22E-51 | 2.5 | MYO5C     | 1.869565217 |
| FLVCR21        | 1.03E-55 | 0.2302478 | 0.098 | 0.033 | 2.49E-51 | 2.5 | FLVCR2    | 2.96969697  |
| IQCB11         | 1.08E-55 | 0.2825306 | 0.216 | 0.107 | 2.61E-51 | 2.5 | IQCB1     | 2.018691589 |
| PHLDB23        | 1.32E-55 | 0.2716201 | 0.579 | 0.397 | 3.19E-51 | 2.5 | PHLDB2    | 1.458438287 |
| RP11-701H24.91 | 1.54E-55 | 0.2667517 | 0.145 | 0.061 | 3.70E-51 | 2.5 | RP11-701H | 2.37704918  |
| VPS81          | 1.58E-55 | 0.2749375 | 0.225 | 0.114 | 3.82E-51 | 2.5 | VPS8      | 1.973684211 |
| KTN14          | 1.67E-55 | 0.2955472 | 0.693 | 0.522 | 4.02E-51 | 2.5 | KTN1      | 1.327586207 |
| PARM12         | 2.88E-55 | 0.2532419 | 0.145 | 0.06  | 6.96E-51 | 2.5 | PARM1     | 2.416666667 |
| CAP22          | 3.07E-55 | 0.3190136 | 0.217 | 0.11  | 7.40E-51 | 2.5 | CAP2      | 1.972727273 |
| PRKAR2A3       | 3.33E-55 | 0.2389409 | 0.276 | 0.152 | 8.02E-51 | 2.5 | PRKAR2A   | 1.815789474 |
| KITLG1         | 3.79E-55 | 0.2374623 | 0.108 | 0.039 | 9.14E-51 | 2.5 | KITLG     | 2.769230769 |
| UBA6-AS1       | 7.88E-55 | 0.3145639 | 0.211 | 0.104 | 1.90E-50 | 2.5 | UBA6-AS1  | 2.028846154 |
| CLASP22        | 1.05E-54 | 0.3320315 | 0.402 | 0.256 | 2.53E-50 | 2.5 | CLASP2    | 1.5703125   |
| DNMBP1         | 1.09E-54 | 0.2396268 | 0.144 | 0.06  | 2.62E-50 | 2.5 | DNMBP     | 2.4         |

|                |          |           |       |       |          |     |           |             |
|----------------|----------|-----------|-------|-------|----------|-----|-----------|-------------|
| TIMP21         | 1.26E-54 | 0.2276935 | 0.137 | 0.056 | 3.05E-50 | 2.5 | TIMP2     | 2.446428571 |
| ANKIB11        | 1.31E-54 | 0.3295214 | 0.504 | 0.339 | 3.17E-50 | 2.5 | ANKIB1    | 1.486725664 |
| SLC16A43       | 1.73E-54 | 0.2564313 | 0.185 | 0.086 | 4.18E-50 | 2.5 | SLC16A4   | 2.151162791 |
| CSPP12         | 1.98E-54 | 0.2886562 | 0.291 | 0.162 | 4.79E-50 | 2.5 | CSPP1     | 1.796296296 |
| PPA22          | 2.13E-54 | 0.3230876 | 0.308 | 0.179 | 5.14E-50 | 2.5 | PPA2      | 1.720670391 |
| LPP2           | 5.84E-54 | 0.2520923 | 0.97  | 0.907 | 1.41E-49 | 2.5 | LPP       | 1.069459757 |
| SLC37A11       | 6.62E-54 | 0.2618807 | 0.164 | 0.074 | 1.60E-49 | 2.5 | SLC37A1   | 2.216216216 |
| PPP4R41        | 1.12E-53 | 0.3923495 | 0.173 | 0.08  | 2.69E-49 | 2.5 | PPP4R4    | 2.1625      |
| SHANK21        | 1.12E-53 | 0.3256354 | 0.353 | 0.216 | 2.71E-49 | 2.5 | SHANK2    | 1.634259259 |
| ZBTB383        | 1.14E-53 | 0.3045028 | 0.462 | 0.305 | 2.75E-49 | 2.5 | ZBTB38    | 1.514754098 |
| IL20RA2        | 1.51E-53 | 0.2550541 | 0.118 | 0.045 | 3.64E-49 | 2.5 | IL20RA    | 2.622222222 |
| HIST2H2BE2     | 1.95E-53 | 0.3107478 | 0.2   | 0.099 | 4.71E-49 | 2.5 | HIST2H2BE | 2.02020202  |
| TXNIP2         | 2.09E-53 | 0.3583968 | 0.526 | 0.362 | 5.04E-49 | 2.5 | TXNIP     | 1.453038674 |
| PI4KA1         | 2.24E-53 | 0.2788402 | 0.215 | 0.109 | 5.40E-49 | 2.5 | PI4KA     | 1.972477064 |
| NRDC1          | 2.84E-53 | 0.3164898 | 0.332 | 0.198 | 6.85E-49 | 2.5 | NRDC      | 1.676767677 |
| GULP12         | 3.16E-53 | 0.3403766 | 0.321 | 0.192 | 7.61E-49 | 2.5 | GULP1     | 1.671875    |
| ZNF6751        | 3.56E-53 | 0.2900554 | 0.193 | 0.093 | 8.58E-49 | 2.5 | ZNF675    | 2.075268817 |
| USP342         | 4.69E-53 | 0.3101019 | 0.782 | 0.633 | 1.13E-48 | 2.5 | USP34     | 1.235387046 |
| STMN11         | 5.04E-53 | 0.3557825 | 0.37  | 0.23  | 1.22E-48 | 2.5 | STMN1     | 1.608695652 |
| ARHGAP351      | 5.88E-53 | 0.2617886 | 0.169 | 0.077 | 1.42E-48 | 2.5 | ARHGAP35  | 2.194805195 |
| RANBP93        | 9.63E-53 | 0.3148624 | 0.435 | 0.28  | 2.32E-48 | 2.5 | RANBP9    | 1.553571429 |
| KIAA16712      | 1.76E-52 | 0.2877836 | 0.311 | 0.181 | 4.26E-48 | 2.5 | KIAA1671  | 1.718232044 |
| ATP6V0E13      | 1.93E-52 | 0.2886048 | 0.812 | 0.677 | 4.66E-48 | 2.5 | ATP6V0E1  | 1.199409158 |
| KIAA02321      | 3.84E-52 | 0.3141077 | 0.308 | 0.18  | 9.25E-48 | 2.5 | KIAA0232  | 1.711111111 |
| TCP11L22       | 3.92E-52 | 0.2634951 | 0.192 | 0.094 | 9.45E-48 | 2.5 | TCP11L2   | 2.042553191 |
| DIO2-AS13      | 8.40E-52 | 0.2589066 | 0.163 | 0.073 | 2.03E-47 | 2.5 | DIO2-AS1  | 2.232876712 |
| KCNE42         | 1.03E-51 | 0.1883931 | 0.079 | 0.024 | 2.47E-47 | 2.5 | KCNE4     | 3.291666667 |
| SMAD13         | 1.04E-51 | 0.2708238 | 0.186 | 0.09  | 2.51E-47 | 2.5 | SMAD1     | 2.066666667 |
| SUCLG22        | 1.30E-51 | 0.3022324 | 0.232 | 0.123 | 3.14E-47 | 2.5 | SUCLG2    | 1.886178862 |
| CTD-2561J22.32 | 1.32E-51 | 0.198308  | 0.12  | 0.047 | 3.18E-47 | 2.5 | CTD-2561J | 2.553191489 |
| BRAF2          | 1.43E-51 | 0.3264675 | 0.558 | 0.401 | 3.44E-47 | 2.5 | BRAF      | 1.391521197 |
| NFE2L22        | 1.44E-51 | 0.288957  | 0.525 | 0.361 | 3.47E-47 | 2.5 | NFE2L2    | 1.454293629 |
| SNX252         | 1.46E-51 | 0.3254119 | 0.296 | 0.172 | 3.51E-47 | 2.5 | SNX25     | 1.720930233 |
| AC009950.21    | 1.51E-51 | 0.1430966 | 0.053 | 0.012 | 3.64E-47 | 2.5 | AC009950. | 4.416666667 |
| LNK23          | 1.90E-51 | 0.2539276 | 0.25  | 0.133 | 4.58E-47 | 2.5 | LNK2      | 1.879699248 |
| AKAP91         | 2.03E-51 | 0.3069486 | 0.543 | 0.382 | 4.91E-47 | 2.5 | AKAP9     | 1.421465969 |
| AIM12          | 2.07E-51 | 0.2718794 | 0.595 | 0.425 | 4.98E-47 | 2.5 | AIM1      | 1.4         |
| TOM1L22        | 3.24E-51 | 0.2766059 | 0.44  | 0.282 | 7.81E-47 | 2.5 | TOM1L2    | 1.560283688 |
| AK9            | 3.74E-51 | 0.2539534 | 0.155 | 0.069 | 9.03E-47 | 2.5 | AK9       | 2.246376812 |
| ABHD21         | 4.62E-51 | 0.2968121 | 0.244 | 0.132 | 1.12E-46 | 2.5 | ABHD2     | 1.848484848 |
| CAPS2          | 4.86E-51 | 0.187799  | 0.084 | 0.027 | 1.17E-46 | 2.5 | CAPS2     | 3.111111111 |
| AIG12          | 5.22E-51 | 0.3107574 | 0.323 | 0.191 | 1.26E-46 | 2.5 | AIG1      | 1.691099476 |
| TBC1D11        | 5.69E-51 | 0.3527684 | 0.332 | 0.203 | 1.37E-46 | 2.5 | TBC1D1    | 1.63546798  |
| KIAA19581      | 5.84E-51 | 0.2778239 | 0.238 | 0.127 | 1.41E-46 | 2.5 | KIAA1958  | 1.874015748 |
| FCHO21         | 6.92E-51 | 0.2989164 | 0.28  | 0.16  | 1.67E-46 | 2.5 | FCHO2     | 1.75        |
| PPARG2         | 9.16E-51 | 0.2913054 | 0.261 | 0.142 | 2.21E-46 | 2.5 | PPARG     | 1.838028169 |
| NBPF1          | 9.24E-51 | 0.2040426 | 0.092 | 0.031 | 2.23E-46 | 2.5 | NBPF1     | 2.967741935 |
| SLC38A92       | 1.24E-50 | 0.2451361 | 0.142 | 0.061 | 2.98E-46 | 2.5 | SLC38A9   | 2.327868852 |
| PRIM22         | 1.24E-50 | 0.2518387 | 0.173 | 0.082 | 2.99E-46 | 2.5 | PRIM2     | 2.109756098 |
| FAM188A3       | 1.37E-50 | 0.2378629 | 0.186 | 0.089 | 3.31E-46 | 2.5 | FAM188A   | 2.08988764  |
| ECE12          | 1.39E-50 | 0.2862143 | 0.301 | 0.172 | 3.34E-46 | 2.5 | ECE1      | 1.75        |
| RAB17          | 1.40E-50 | 0.1590646 | 0.07  | 0.02  | 3.37E-46 | 2.5 | RAB17     | 3.5         |

|            |          |           |       |       |          |     |           |             |
|------------|----------|-----------|-------|-------|----------|-----|-----------|-------------|
| DYNLT12    | 1.44E-50 | 0.3730145 | 0.714 | 0.577 | 3.47E-46 | 2.5 | DYNLT1    | 1.237435009 |
| BMF        | 2.75E-50 | 0.1093386 | 0.038 | 0.006 | 6.64E-46 | 2.5 | BMF       | 6.333333333 |
| NAIP2      | 3.02E-50 | 0.2533127 | 0.19  | 0.093 | 7.28E-46 | 2.5 | NAIP      | 2.043010753 |
| ADGRV12    | 3.04E-50 | 0.2825954 | 0.27  | 0.151 | 7.34E-46 | 2.5 | ADGRV1    | 1.78807947  |
| LMNA2      | 3.29E-50 | 0.3182357 | 0.35  | 0.216 | 7.93E-46 | 2.5 | LMNA      | 1.62037037  |
| PAPD42     | 5.12E-50 | 0.3217155 | 0.442 | 0.296 | 1.23E-45 | 2.5 | PAPD4     | 1.493243243 |
| GM2A1      | 5.34E-50 | 0.1748859 | 0.093 | 0.032 | 1.29E-45 | 2.5 | GM2A      | 2.90625     |
| SPICE11    | 6.60E-50 | 0.2476779 | 0.136 | 0.058 | 1.59E-45 | 2.5 | SPICE1    | 2.344827586 |
| CFAP44     | 9.43E-50 | 0.2105143 | 0.1   | 0.036 | 2.27E-45 | 2.5 | CFAP44    | 2.777777778 |
| KIAA14561  | 1.01E-49 | 0.1524079 | 0.066 | 0.018 | 2.44E-45 | 2.5 | KIAA1456  | 3.666666667 |
| EBF41      | 1.21E-49 | 0.2367248 | 0.128 | 0.053 | 2.92E-45 | 2.5 | EBF4      | 2.41509434  |
| XRN23      | 1.61E-49 | 0.3026747 | 0.321 | 0.194 | 3.88E-45 | 2.5 | XRN2      | 1.654639175 |
| SEPW13     | 1.85E-49 | 0.3128328 | 0.262 | 0.147 | 4.46E-45 | 2.5 | SEPW1     | 1.782312925 |
| CSMD22     | 2.46E-49 | 0.1686136 | 0.068 | 0.019 | 5.93E-45 | 2.5 | CSMD2     | 3.578947368 |
| ANKS1A2    | 2.90E-49 | 0.2969523 | 0.307 | 0.181 | 6.98E-45 | 2.5 | ANKS1A    | 1.696132597 |
| RPGR1      | 3.04E-49 | 0.2462462 | 0.168 | 0.079 | 7.32E-45 | 2.5 | RPGR      | 2.126582278 |
| SERF24     | 3.63E-49 | 0.3998651 | 0.531 | 0.376 | 8.76E-45 | 2.5 | SERF2     | 1.412234043 |
| RAB312     | 4.69E-49 | 0.346229  | 0.298 | 0.176 | 1.13E-44 | 2.5 | RAB31     | 1.693181818 |
| ZC2HC1A1   | 5.79E-49 | 0.1911947 | 0.102 | 0.038 | 1.40E-44 | 2.5 | ZC2HC1A   | 2.684210526 |
| PHF21A2    | 7.66E-49 | 0.3222667 | 0.355 | 0.222 | 1.85E-44 | 2.5 | PHF21A    | 1.599099099 |
| HDAC82     | 7.77E-49 | 0.3180708 | 0.364 | 0.228 | 1.87E-44 | 2.5 | HDAC8     | 1.596491228 |
| PTPRK3     | 9.43E-49 | 0.1793713 | 0.901 | 0.753 | 2.27E-44 | 2.5 | PTPRK     | 1.196547145 |
| PLPP11     | 1.07E-48 | 0.2891549 | 0.21  | 0.108 | 2.57E-44 | 2.5 | PLPP1     | 1.944444444 |
| HIST1H2BJ1 | 1.33E-48 | 0.3002742 | 0.224 | 0.119 | 3.21E-44 | 2.5 | HIST1H2BJ | 1.882352941 |
| MSH32      | 1.84E-48 | 0.2445709 | 0.181 | 0.089 | 4.43E-44 | 2.5 | MSH3      | 2.033707865 |
| RNF2132    | 2.58E-48 | 0.3125993 | 0.283 | 0.166 | 6.22E-44 | 2.5 | RNF213    | 1.704819277 |
| PDZD84     | 3.46E-48 | 0.2776263 | 0.353 | 0.215 | 8.34E-44 | 2.5 | PDZD8     | 1.641860465 |
| GMDS-AS12  | 3.58E-48 | 0.3220246 | 0.195 | 0.1   | 8.63E-44 | 2.5 | GMDS-AS1  | 1.95        |
| ARL152     | 3.63E-48 | 0.3137803 | 0.319 | 0.193 | 8.75E-44 | 2.5 | ARL15     | 1.652849741 |
| NINJ1      | 3.78E-48 | 0.1883048 | 0.068 | 0.019 | 9.12E-44 | 2.5 | NINJ1     | 3.578947368 |
| TMEM1351   | 4.68E-48 | 0.2403794 | 0.194 | 0.097 | 1.13E-43 | 2.5 | TMEM135   | 2           |
| KIAA13282  | 5.12E-48 | 0.2919808 | 0.216 | 0.113 | 1.23E-43 | 2.5 | KIAA1328  | 1.911504425 |
| PLXNA22    | 5.14E-48 | 0.2212293 | 0.099 | 0.036 | 1.24E-43 | 2.5 | PLXNA2    | 2.75        |
| HIF1A1     | 8.68E-48 | 0.4043593 | 0.566 | 0.425 | 2.09E-43 | 2.5 | HIF1A     | 1.331764706 |
| FAM46C2    | 9.95E-48 | 0.1786626 | 0.088 | 0.03  | 2.40E-43 | 2.5 | FAM46C    | 2.933333333 |
| AMFR3      | 1.00E-47 | 0.2660185 | 0.201 | 0.102 | 2.41E-43 | 2.5 | AMFR      | 1.970588235 |
| EXPH51     | 1.01E-47 | 0.2972338 | 0.285 | 0.166 | 2.43E-43 | 2.5 | EXPH5     | 1.71686747  |
| NR6A13     | 1.01E-47 | 0.1500869 | 0.501 | 0.331 | 2.45E-43 | 2.5 | NR6A1     | 1.513595166 |
| SLK2       | 1.02E-47 | 0.2578791 | 0.357 | 0.219 | 2.45E-43 | 2.5 | SLK       | 1.630136986 |
| FBXL202    | 1.25E-47 | 0.2934314 | 0.447 | 0.299 | 3.00E-43 | 2.5 | FBXL20    | 1.494983278 |
| AC026188.1 | 1.30E-47 | 0.1985298 | 0.076 | 0.024 | 3.13E-43 | 2.5 | AC026188. | 3.166666667 |
| ETS22      | 1.40E-47 | 0.2966014 | 0.294 | 0.171 | 3.37E-43 | 2.5 | ETS2      | 1.719298246 |
| IGFBP44    | 1.43E-47 | 0.1752192 | 0.241 | 0.126 | 3.44E-43 | 2.5 | IGFBP4    | 1.912698413 |
| SRD5A31    | 1.51E-47 | 0.2372569 | 0.139 | 0.061 | 3.63E-43 | 2.5 | SRD5A3    | 2.278688525 |
| TTC8       | 1.56E-47 | 0.1812787 | 0.089 | 0.031 | 3.75E-43 | 2.5 | TTC8      | 2.870967742 |
| MIR34AHG1  | 1.80E-47 | 0.231233  | 0.134 | 0.058 | 4.35E-43 | 2.5 | MIR34AHG  | 2.310344828 |
| STAM21     | 2.44E-47 | 0.2564761 | 0.163 | 0.078 | 5.87E-43 | 2.5 | STAM2     | 2.08974359  |
| CSF3R1     | 2.73E-47 | 0.2134814 | 0.087 | 0.03  | 6.59E-43 | 2.5 | CSF3R     | 2.9         |
| ZMAT3      | 2.85E-47 | 0.2155912 | 0.118 | 0.048 | 6.88E-43 | 2.5 | ZMAT3     | 2.458333333 |
| ZKSCAN12   | 3.83E-47 | 0.3051147 | 0.373 | 0.238 | 9.23E-43 | 2.5 | ZKSCAN1   | 1.567226891 |
| SPG112     | 3.83E-47 | 0.2786471 | 0.421 | 0.278 | 9.24E-43 | 2.5 | SPG11     | 1.514388489 |
| SCD2       | 4.40E-47 | 0.3754871 | 0.211 | 0.113 | 1.06E-42 | 2.5 | SCD       | 1.867256637 |

|             |          |           |       |       |          |     |           |             |
|-------------|----------|-----------|-------|-------|----------|-----|-----------|-------------|
| VPS252      | 4.62E-47 | 0.2915368 | 0.23  | 0.126 | 1.11E-42 | 2.5 | VPS25     | 1.825396825 |
| GALNT21     | 4.64E-47 | 0.2744757 | 0.243 | 0.134 | 1.12E-42 | 2.5 | GALNT2    | 1.813432836 |
| HDAC4       | 4.73E-47 | 0.1870633 | 0.116 | 0.047 | 1.14E-42 | 2.5 | HDAC4     | 2.468085106 |
| MAN1A13     | 5.11E-47 | 0.2668611 | 0.346 | 0.212 | 1.23E-42 | 2.5 | MAN1A1    | 1.632075472 |
| WDR72       | 1.03E-46 | 0.2041036 | 0.112 | 0.044 | 2.49E-42 | 2.5 | WDR7      | 2.545454545 |
| CAMK2N12    | 1.09E-46 | 0.1813517 | 0.102 | 0.038 | 2.62E-42 | 2.5 | CAMK2N1   | 2.684210526 |
| CP1         | 1.13E-46 | 0.8385063 | 0.125 | 0.054 | 2.73E-42 | 2.5 | CP        | 2.314814815 |
| PBRM13      | 1.32E-46 | 0.268621  | 0.339 | 0.21  | 3.18E-42 | 2.5 | PBRM1     | 1.614285714 |
| VPS502      | 1.61E-46 | 0.2813533 | 0.163 | 0.077 | 3.87E-42 | 2.5 | VPS50     | 2.116883117 |
| GIGYF21     | 1.77E-46 | 0.2814343 | 0.419 | 0.277 | 4.26E-42 | 2.5 | GIGYF2    | 1.512635379 |
| ZFAND54     | 1.79E-46 | 0.263376  | 0.578 | 0.415 | 4.32E-42 | 2.5 | ZFAND5    | 1.392771084 |
| LAMA13      | 2.22E-46 | 0.3878027 | 0.186 | 0.094 | 5.36E-42 | 2.5 | LAMA1     | 1.978723404 |
| EFNA13      | 2.44E-46 | 0.2740541 | 0.359 | 0.223 | 5.89E-42 | 2.5 | EFNA1     | 1.609865471 |
| DCLK11      | 3.00E-46 | 0.3070746 | 0.105 | 0.041 | 7.24E-42 | 2.5 | DCLK1     | 2.56097561  |
| ZFAND33     | 3.12E-46 | 0.1873591 | 0.883 | 0.743 | 7.53E-42 | 2.5 | ZFAND3    | 1.188425303 |
| CEACAM61    | 3.14E-46 | 0.1741729 | 0.071 | 0.022 | 7.58E-42 | 2.5 | CEACAM6   | 3.227272727 |
| WDFY22      | 3.90E-46 | 0.2950697 | 0.386 | 0.25  | 9.40E-42 | 2.5 | WDFY2     | 1.544       |
| CARHSP12    | 4.62E-46 | 0.315842  | 0.39  | 0.256 | 1.12E-41 | 2.5 | CARHSP1   | 1.5234375   |
| DNAH72      | 5.32E-46 | 0.1673506 | 0.077 | 0.025 | 1.28E-41 | 2.5 | DNAH7     | 3.08        |
| AAK12       | 7.71E-46 | 0.2245774 | 0.271 | 0.153 | 1.86E-41 | 2.5 | AAK1      | 1.77124183  |
| ABHD182     | 7.75E-46 | 0.252401  | 0.485 | 0.325 | 1.87E-41 | 2.5 | ABHD18    | 1.492307692 |
| ZNF2082     | 8.97E-46 | 0.169514  | 0.096 | 0.035 | 2.16E-41 | 2.5 | ZNF208    | 2.742857143 |
| KLHL423     | 1.05E-45 | 0.2266678 | 0.141 | 0.064 | 2.54E-41 | 2.5 | KLHL42    | 2.203125    |
| FGFR1OP2    | 1.15E-45 | 0.2014518 | 0.118 | 0.048 | 2.77E-41 | 2.5 | FGFR1OP   | 2.458333333 |
| B3GLCT1     | 1.40E-45 | 0.2164726 | 0.138 | 0.061 | 3.37E-41 | 2.5 | B3GLCT    | 2.262295082 |
| INTS81      | 1.55E-45 | 0.2081901 | 0.106 | 0.042 | 3.73E-41 | 2.5 | INTS8     | 2.523809524 |
| FOXO31      | 1.81E-45 | 0.341634  | 0.493 | 0.344 | 4.37E-41 | 2.5 | FOXO3     | 1.433139535 |
| MTX22       | 2.24E-45 | 0.2391466 | 0.157 | 0.075 | 5.41E-41 | 2.5 | MTX2      | 2.093333333 |
| LRP111      | 2.55E-45 | 0.2610124 | 0.164 | 0.079 | 6.14E-41 | 2.5 | LRP11     | 2.075949367 |
| TAPBP2      | 3.38E-45 | 0.2962886 | 0.235 | 0.131 | 8.14E-41 | 2.5 | TAPBP     | 1.79389313  |
| AMN11       | 3.43E-45 | 0.2721088 | 0.253 | 0.144 | 8.26E-41 | 2.5 | AMN1      | 1.756944444 |
| FNDC3B2     | 3.48E-45 | 0.2778688 | 0.881 | 0.757 | 8.38E-41 | 2.5 | FNDC3B    | 1.163804491 |
| MRPS101     | 5.55E-45 | 0.2019546 | 0.131 | 0.057 | 1.34E-40 | 2.5 | MRPS10    | 2.298245614 |
| ZBTB13      | 6.44E-45 | 0.2661685 | 0.18  | 0.092 | 1.55E-40 | 2.5 | ZBTB1     | 1.956521739 |
| GPCPD11     | 6.60E-45 | 0.3092987 | 0.244 | 0.139 | 1.59E-40 | 2.5 | GPCPD1    | 1.755395683 |
| ZNRF12      | 6.74E-45 | 0.2668612 | 0.268 | 0.154 | 1.63E-40 | 2.5 | ZNRF1     | 1.74025974  |
| SECISBP23   | 7.21E-45 | 0.234733  | 0.178 | 0.089 | 1.74E-40 | 2.5 | SECISBP2  | 2           |
| RPH3AL1     | 9.00E-45 | 0.133113  | 0.057 | 0.015 | 2.17E-40 | 2.5 | RPH3AL    | 3.8         |
| ZFYVE162    | 9.47E-45 | 0.2544032 | 0.186 | 0.095 | 2.28E-40 | 2.5 | ZFYVE16   | 1.957894737 |
| AC007682.11 | 1.08E-44 | 0.2475816 | 0.062 | 0.018 | 2.60E-40 | 2.5 | AC007682. | 3.444444444 |
| BTG13       | 1.15E-44 | 0.3011827 | 0.709 | 0.564 | 2.77E-40 | 2.5 | BTG1      | 1.257092199 |
| MICALCL2    | 1.18E-44 | 0.1840713 | 0.092 | 0.034 | 2.84E-40 | 2.5 | MICALCL   | 2.705882353 |
| CD1644      | 1.19E-44 | 0.246774  | 0.408 | 0.265 | 2.87E-40 | 2.5 | CD164     | 1.539622642 |
| SIK21       | 1.31E-44 | 0.3778898 | 0.448 | 0.308 | 3.17E-40 | 2.5 | SIK2      | 1.454545455 |
| HSPH14      | 1.68E-44 | 0.1228141 | 0.421 | 0.266 | 4.06E-40 | 2.5 | HSPH1     | 1.582706767 |
| ADAR1       | 1.71E-44 | 0.2636544 | 0.212 | 0.115 | 4.13E-40 | 2.5 | ADAR      | 1.843478261 |
| TMCC12      | 1.89E-44 | 0.2981279 | 0.364 | 0.238 | 4.57E-40 | 2.5 | TMCC1     | 1.529411765 |
| SNX101      | 1.98E-44 | 0.2364655 | 0.136 | 0.061 | 4.78E-40 | 2.5 | SNX10     | 2.229508197 |
| RPRD22      | 2.75E-44 | 0.2846003 | 0.24  | 0.136 | 6.64E-40 | 2.5 | RPRD2     | 1.764705882 |
| EFHC12      | 4.09E-44 | 0.2010094 | 0.134 | 0.059 | 9.86E-40 | 2.5 | EFHC1     | 2.271186441 |
| TDRD31      | 4.13E-44 | 0.2478959 | 0.185 | 0.095 | 9.95E-40 | 2.5 | TDRD3     | 1.947368421 |
| OPN33       | 4.28E-44 | 0.2069943 | 0.172 | 0.085 | 1.03E-39 | 2.5 | OPN3      | 2.023529412 |

|                |          |           |       |       |          |     |           |             |
|----------------|----------|-----------|-------|-------|----------|-----|-----------|-------------|
| PDS5B1         | 4.37E-44 | 0.2690324 | 0.474 | 0.328 | 1.05E-39 | 2.5 | PDS5B     | 1.445121951 |
| CASK3          | 4.85E-44 | 0.2505246 | 0.51  | 0.353 | 1.17E-39 | 2.5 | CASK      | 1.444759207 |
| TMEM2411       | 5.55E-44 | 0.2491856 | 0.161 | 0.078 | 1.34E-39 | 2.5 | TMEM241   | 2.064102564 |
| RPS27L3        | 5.91E-44 | 0.4590448 | 0.64  | 0.5   | 1.42E-39 | 2.5 | RPS27L    | 1.28        |
| RCN14          | 6.40E-44 | 0.2514324 | 0.249 | 0.141 | 1.54E-39 | 2.5 | RCN1      | 1.765957447 |
| ZNF1072        | 7.90E-44 | 0.2693807 | 0.166 | 0.083 | 1.90E-39 | 2.5 | ZNF107    | 2           |
| TMEM1401       | 1.05E-43 | 0.1047379 | 0.049 | 0.012 | 2.53E-39 | 2.5 | TMEM140   | 4.083333333 |
| MCPH12         | 1.06E-43 | 0.2924296 | 0.273 | 0.162 | 2.56E-39 | 2.5 | MCPH1     | 1.685185185 |
| RNASE41        | 1.10E-43 | 0.2608397 | 0.186 | 0.096 | 2.66E-39 | 2.5 | RNASE4    | 1.9375      |
| CORO2A1        | 1.15E-43 | 0.2265819 | 0.123 | 0.053 | 2.78E-39 | 2.5 | CORO2A    | 2.320754717 |
| GSTCD3         | 2.12E-43 | 0.1870889 | 0.192 | 0.099 | 5.11E-39 | 2.5 | GSTCD     | 1.939393939 |
| NFATC32        | 2.23E-43 | 0.2541601 | 0.269 | 0.158 | 5.37E-39 | 2.5 | NFATC3    | 1.702531646 |
| DDB21          | 2.37E-43 | 0.1862965 | 0.086 | 0.031 | 5.72E-39 | 2.5 | DDB2      | 2.774193548 |
| RBX11          | 2.95E-43 | 0.3056223 | 0.565 | 0.421 | 7.11E-39 | 2.5 | RBX1      | 1.342042755 |
| EXOC6B2        | 2.95E-43 | 0.2264642 | 0.396 | 0.256 | 7.12E-39 | 2.5 | EXOC6B    | 1.546875    |
| S100P2         | 3.48E-43 | 0.3020892 | 0.111 | 0.046 | 8.38E-39 | 2.5 | S100P     | 2.413043478 |
| CTD-2337A12.11 | 3.95E-43 | 0.2924538 | 0.304 | 0.185 | 9.52E-39 | 2.5 | CTD-2337A | 1.643243243 |
| STAT11         | 4.10E-43 | 0.2461251 | 0.145 | 0.068 | 9.90E-39 | 2.5 | STAT1     | 2.132352941 |
| KDM4B2         | 4.54E-43 | 0.2211936 | 0.161 | 0.078 | 1.09E-38 | 2.5 | KDM4B     | 2.064102564 |
| RBM473         | 5.56E-43 | 0.2598955 | 0.774 | 0.617 | 1.34E-38 | 2.5 | RBM47     | 1.25445705  |
| DUSP53         | 6.62E-43 | 0.1595316 | 0.36  | 0.222 | 1.60E-38 | 2.5 | DUSP5     | 1.621621622 |
| TNRC6C1        | 6.89E-43 | 0.1820188 | 0.094 | 0.035 | 1.66E-38 | 2.5 | TNRC6C    | 2.685714286 |
| BCL2L16        | 7.33E-43 | 0.2924476 | 0.256 | 0.149 | 1.77E-38 | 2.5 | BCL2L1    | 1.718120805 |
| LDLRAD43       | 7.74E-43 | 0.2777631 | 0.267 | 0.157 | 1.87E-38 | 2.5 | LDLRAD4   | 1.700636943 |
| ZNF4401        | 8.19E-43 | 0.2028151 | 0.104 | 0.042 | 1.97E-38 | 2.5 | ZNF440    | 2.476190476 |
| NSF2           | 9.12E-43 | 0.2460689 | 0.243 | 0.138 | 2.20E-38 | 2.5 | NSF       | 1.760869565 |
| RFK2           | 9.38E-43 | 0.1640733 | 0.101 | 0.039 | 2.26E-38 | 2.5 | RFK       | 2.58974359  |
| REEP54         | 1.10E-42 | 0.2562899 | 0.37  | 0.237 | 2.65E-38 | 2.5 | REEP5     | 1.561181435 |
| ZDHHC202       | 1.20E-42 | 0.2577522 | 0.276 | 0.164 | 2.88E-38 | 2.5 | ZDHHC20   | 1.682926829 |
| SIPA1L22       | 1.42E-42 | 0.3259614 | 0.227 | 0.127 | 3.43E-38 | 2.5 | SIPA1L2   | 1.787401575 |
| AFF12          | 1.43E-42 | 0.2640107 | 0.505 | 0.356 | 3.45E-38 | 2.5 | AFF1      | 1.418539326 |
| FDPS3          | 1.61E-42 | 0.4776936 | 0.573 | 0.437 | 3.87E-38 | 2.5 | FDPS      | 1.311212815 |
| SLX4IP2        | 2.74E-42 | 0.2013753 | 0.116 | 0.049 | 6.62E-38 | 2.5 | SLX4IP    | 2.367346939 |
| DDI22          | 3.06E-42 | 0.2481623 | 0.172 | 0.087 | 7.38E-38 | 2.5 | DDI2      | 1.977011494 |
| DHCR243        | 3.30E-42 | 0.3138179 | 0.286 | 0.175 | 7.95E-38 | 2.5 | DHCR24    | 1.634285714 |
| SLC41A22       | 4.02E-42 | 0.2315384 | 0.204 | 0.108 | 9.69E-38 | 2.5 | SLC41A2   | 1.888888889 |
| ST3GAL13       | 4.06E-42 | 0.2970493 | 0.3   | 0.188 | 9.78E-38 | 2.5 | ST3GAL1   | 1.595744681 |
| CCPG11         | 4.95E-42 | 0.219416  | 0.173 | 0.087 | 1.19E-37 | 2.5 | CCPG1     | 1.988505747 |
| NDUFV23        | 5.88E-42 | 0.2198593 | 0.395 | 0.254 | 1.42E-37 | 2.5 | NDUFV2    | 1.55511811  |
| STIM13         | 8.16E-42 | 0.2991398 | 0.34  | 0.218 | 1.97E-37 | 2.5 | STIM1     | 1.559633028 |
| PPP1R211       | 1.05E-41 | 0.2626602 | 0.198 | 0.107 | 2.52E-37 | 2.5 | PPP1R21   | 1.85046729  |
| SLC35A33       | 1.10E-41 | 0.2168683 | 0.167 | 0.084 | 2.66E-37 | 2.5 | SLC35A3   | 1.988095238 |
| ACACA1         | 1.13E-41 | 0.2926579 | 0.253 | 0.148 | 2.72E-37 | 2.5 | ACACA     | 1.709459459 |
| LOXL21         | 1.47E-41 | 0.2070079 | 0.082 | 0.029 | 3.55E-37 | 2.5 | LOXL2     | 2.827586207 |
| ZZEF12         | 1.78E-41 | 0.2312111 | 0.179 | 0.092 | 4.29E-37 | 2.5 | ZZEF1     | 1.945652174 |
| BPTF3          | 2.19E-41 | 0.2757215 | 0.456 | 0.32  | 5.28E-37 | 2.5 | BPTF      | 1.425       |
| LASP12         | 2.35E-41 | 0.2407367 | 0.225 | 0.125 | 5.66E-37 | 2.5 | LASP1     | 1.8         |
| INADL2         | 2.75E-41 | 0.220884  | 0.927 | 0.805 | 6.63E-37 | 2.5 | INADL     | 1.151552795 |
| ANO62          | 4.19E-41 | 0.1751117 | 0.674 | 0.498 | 1.01E-36 | 2.5 | ANO6      | 1.353413655 |
| ZNF6382        | 4.22E-41 | 0.2657546 | 0.574 | 0.425 | 1.02E-36 | 2.5 | ZNF638    | 1.350588235 |
| LINC012072     | 5.03E-41 | 0.1483866 | 0.08  | 0.028 | 1.21E-36 | 2.5 | LINC01207 | 2.857142857 |
| SLMAP3         | 5.56E-41 | 0.2646269 | 0.799 | 0.656 | 1.34E-36 | 2.5 | SLMAP     | 1.217987805 |



|                |          |           |       |       |          |     |           |             |
|----------------|----------|-----------|-------|-------|----------|-----|-----------|-------------|
| FARS22         | 6.18E-41 | 0.2118049 | 0.154 | 0.075 | 1.49E-36 | 2.5 | FARS2     | 2.053333333 |
| IMMP2L2        | 6.47E-41 | 0.3367092 | 0.406 | 0.279 | 1.56E-36 | 2.5 | IMMP2L    | 1.455197133 |
| RHBDD12        | 6.60E-41 | 0.2728267 | 0.225 | 0.128 | 1.59E-36 | 2.5 | RHBDD1    | 1.7578125   |
| SDC31          | 7.56E-41 | 0.1669387 | 0.076 | 0.026 | 1.82E-36 | 2.5 | SDC3      | 2.923076923 |
| PHC21          | 7.77E-41 | 0.2247064 | 0.19  | 0.101 | 1.87E-36 | 2.5 | PHC2      | 1.881188119 |
| TOM1L12        | 7.81E-41 | 0.2656646 | 0.38  | 0.25  | 1.88E-36 | 2.5 | TOM1L1    | 1.52        |
| FAM120B2       | 8.95E-41 | 0.2266396 | 0.201 | 0.109 | 2.16E-36 | 2.5 | FAM120B   | 1.844036697 |
| CTD-2047H16.41 | 1.17E-40 | 0.1767423 | 0.099 | 0.039 | 2.82E-36 | 2.5 | CTD-2047H | 2.538461538 |
| VPS13A1        | 1.54E-40 | 0.2348352 | 0.245 | 0.141 | 3.70E-36 | 2.5 | VPS13A    | 1.737588652 |
| DCDC22         | 1.79E-40 | 0.1543278 | 0.062 | 0.019 | 4.33E-36 | 2.5 | DCDC2     | 3.263157895 |
| SLC1A41        | 2.07E-40 | 0.1643863 | 0.085 | 0.032 | 5.00E-36 | 2.5 | SLC1A4    | 2.65625     |
| CSNK1A13       | 2.21E-40 | 0.2429934 | 0.772 | 0.639 | 5.32E-36 | 2.5 | CSNK1A1   | 1.208137715 |
| KLHL181        | 2.36E-40 | 0.2291629 | 0.147 | 0.071 | 5.70E-36 | 2.5 | KLHL18    | 2.070422535 |
| ANKRD491       | 2.53E-40 | 0.2005906 | 0.129 | 0.059 | 6.10E-36 | 2.5 | ANKRD49   | 2.186440678 |
| IBTK3          | 2.81E-40 | 0.1657028 | 0.333 | 0.206 | 6.79E-36 | 2.5 | IBTK      | 1.616504854 |
| ATP9B1         | 2.92E-40 | 0.2281515 | 0.152 | 0.075 | 7.05E-36 | 2.5 | ATP9B     | 2.026666667 |
| TBCK2          | 3.90E-40 | 0.2565958 | 0.202 | 0.111 | 9.41E-36 | 2.5 | TBCK      | 1.81981982  |
| KIAA20262      | 3.91E-40 | 0.2546432 | 0.29  | 0.177 | 9.44E-36 | 2.5 | KIAA2026  | 1.638418079 |
| AZIN1-AS11     | 4.75E-40 | 0.2138751 | 0.107 | 0.045 | 1.15E-35 | 2.5 | AZIN1-AS1 | 2.377777778 |
| SNTB1          | 5.18E-40 | 0.2631628 | 0.136 | 0.064 | 1.25E-35 | 2.5 | SNTB1     | 2.125       |
| OTUD14         | 5.18E-40 | 0.1809377 | 0.107 | 0.045 | 1.25E-35 | 2.5 | OTUD1     | 2.377777778 |
| SHROOM33       | 5.37E-40 | 0.2433711 | 0.756 | 0.614 | 1.30E-35 | 2.5 | SHROOM3   | 1.231270358 |
| RP11-507B12.23 | 5.67E-40 | 0.2326729 | 0.178 | 0.091 | 1.37E-35 | 2.5 | RP11-507B | 1.956043956 |
| RBM63          | 6.02E-40 | 0.2972355 | 0.457 | 0.324 | 1.45E-35 | 2.5 | RBM6      | 1.410493827 |
| CRABP21        | 6.08E-40 | 0.255853  | 0.204 | 0.111 | 1.47E-35 | 2.5 | CRABP2    | 1.837837838 |
| BTBD91         | 6.94E-40 | 0.2686666 | 0.372 | 0.245 | 1.67E-35 | 2.5 | BTBD9     | 1.518367347 |
| SSBP32         | 7.22E-40 | 0.2422416 | 0.208 | 0.114 | 1.74E-35 | 2.5 | SSBP3     | 1.824561404 |
| BAG14          | 9.02E-40 | 0.2010136 | 0.174 | 0.089 | 2.18E-35 | 2.5 | BAG1      | 1.95505618  |
| NKAIN31        | 9.12E-40 | 0.2047659 | 0.091 | 0.035 | 2.20E-35 | 2.5 | NKAIN3    | 2.6         |
| TTC39B2        | 9.96E-40 | 0.2688129 | 0.161 | 0.083 | 2.40E-35 | 2.5 | TTC39B    | 1.939759036 |
| BMPR22         | 1.02E-39 | 0.2798827 | 0.378 | 0.253 | 2.47E-35 | 2.5 | BMPR2     | 1.494071146 |
| SNRK1          | 1.22E-39 | 0.1998979 | 0.128 | 0.058 | 2.95E-35 | 2.5 | SNRK      | 2.206896552 |
| PAK11          | 1.22E-39 | 0.2565214 | 0.332 | 0.212 | 2.95E-35 | 2.5 | PAK1      | 1.566037736 |
| SIPA1L13       | 1.25E-39 | 0.2376356 | 0.514 | 0.367 | 3.02E-35 | 2.5 | SIPA1L1   | 1.400544959 |
| FYCO11         | 1.29E-39 | 0.1689946 | 0.098 | 0.039 | 3.12E-35 | 2.5 | FYCO1     | 2.512820513 |
| LPGAT11        | 1.29E-39 | 0.2390417 | 0.157 | 0.078 | 3.12E-35 | 2.5 | LPGAT1    | 2.012820513 |
| CDKAL13        | 1.43E-39 | 0.2539282 | 0.348 | 0.225 | 3.45E-35 | 2.5 | CDKAL1    | 1.546666667 |
| CYP1B11        | 1.63E-39 | 0.5310119 | 0.189 | 0.105 | 3.92E-35 | 2.5 | CYP1B1    | 1.8         |
| ADIRF4         | 2.28E-39 | 0.3241533 | 0.129 | 0.06  | 5.50E-35 | 2.5 | ADIRF     | 2.15        |
| RP11-486O13.42 | 2.34E-39 | 0.2542886 | 0.178 | 0.094 | 5.64E-35 | 2.5 | RP11-486O | 1.893617021 |
| ARFGEF22       | 2.67E-39 | 0.2684264 | 0.493 | 0.356 | 6.43E-35 | 2.5 | ARFGEF2   | 1.384831461 |
| PRKD13         | 2.83E-39 | 0.2406333 | 0.291 | 0.178 | 6.82E-35 | 2.5 | PRKD1     | 1.634831461 |
| SYTL42         | 4.49E-39 | 0.2166477 | 0.21  | 0.115 | 1.08E-34 | 2.5 | SYTL4     | 1.826086957 |
| APOL11         | 5.02E-39 | 0.1751848 | 0.078 | 0.028 | 1.21E-34 | 2.5 | APOL1     | 2.785714286 |
| ZNF191         | 6.09E-39 | 0.1549709 | 0.066 | 0.022 | 1.47E-34 | 2.5 | ZNF19     | 3           |
| IGF1R3         | 7.75E-39 | 0.2080744 | 0.644 | 0.484 | 1.87E-34 | 2.5 | IGF1R     | 1.330578512 |
| HIPK24         | 8.03E-39 | 0.2600616 | 0.5   | 0.356 | 1.94E-34 | 2.5 | HIPK2     | 1.404494382 |
| NAT11          | 1.07E-38 | 0.1141821 | 0.051 | 0.014 | 2.59E-34 | 2.5 | NAT1      | 3.642857143 |
| MOCS11         | 1.10E-38 | 0.1243608 | 0.056 | 0.016 | 2.66E-34 | 2.5 | MOCS1     | 3.5         |
| TBC1D302       | 1.33E-38 | 0.1814307 | 0.085 | 0.032 | 3.21E-34 | 2.5 | TBC1D30   | 2.65625     |
| TAF31          | 1.36E-38 | 0.2163487 | 0.157 | 0.079 | 3.28E-34 | 2.5 | TAF3      | 1.987341772 |
| ANKRD124       | 1.42E-38 | 0.1780281 | 0.794 | 0.656 | 3.43E-34 | 2.5 | ANKRD12   | 1.210365854 |

|                |          |           |           |       |          |          |           |             |
|----------------|----------|-----------|-----------|-------|----------|----------|-----------|-------------|
| WDR111         | 1.48E-38 | 0.2226442 | 0.153     | 0.077 | 3.57E-34 | 2.5      | WDR11     | 1.987012987 |
| ME31           | 1.68E-38 | 0.183928  | 0.1       | 0.041 | 4.04E-34 | 2.5      | ME3       | 2.43902439  |
| DIS3L22        | 2.36E-38 | 0.232669  | 0.167     | 0.087 | 5.69E-34 | 2.5      | DIS3L2    | 1.91954023  |
| RREB13         | 2.60E-38 | 0.3074858 | 0.37      | 0.25  | 6.26E-34 | 2.5      | RREB1     | 1.48        |
| TRAF3IP11      | 3.09E-38 | 0.1776676 | 0.098     | 0.04  | 7.46E-34 | 2.5      | TRAF3IP1  | 2.45        |
| SMC1A3         | 3.43E-38 | 0.2265255 | 0.179     | 0.095 | 8.28E-34 | 2.5      | SMC1A     | 1.884210526 |
| KIAA1211       | 3.52E-38 | 0.1296846 | 0.048     | 0.013 | 8.50E-34 | 2.5      | KIAA1211  | 3.692307692 |
| SETD72         | 4.03E-38 | 0.2288044 | 0.21      | 0.117 | 9.71E-34 | 2.5      | SETD7     | 1.794871795 |
| KLF102         | 5.03E-38 | 0.2502295 | 0.227     | 0.132 | 1.21E-33 | 2.5      | KLF10     | 1.71969697  |
| STX183         | 5.71E-38 | 0.2265468 | 0.27      | 0.162 | 1.38E-33 | 2.5      | STX18     | 1.666666667 |
| S100A144       | 6.49E-38 | 0.2161573 | 0.852     | 0.718 | 1.56E-33 | 2.5      | S100A14   | 1.186629526 |
| SDK12          | 7.13E-38 | 0.2433141 | 0.238     | 0.138 | 1.72E-33 | 2.5      | SDK1      | 1.724637681 |
| LINC006571     | 7.26E-38 | 0.2268755 | 0.276     | 0.169 | 1.75E-33 | 2.5      | LINC00657 | 1.633136095 |
| PRRG41         | 9.08E-38 | 0.292999  | 0.37      | 0.25  | 2.19E-33 | 2.5      | PRRG4     | 1.48        |
| NT5DC3         | 9.26E-38 | 0.1865417 | 0.091     | 0.036 | 2.23E-33 | 2.5      | NT5DC3    | 2.527777778 |
| FAM114A13      | 9.31E-38 | 0.2476551 | 0.246     | 0.147 | 2.24E-33 | 2.5      | FAM114A1  | 1.673469388 |
| RGS121         | 1.08E-37 | 0.1949896 | 0.125     | 0.058 | 2.60E-33 | 2.5      | RGS12     | 2.155172414 |
| ARIH13         | 1.16E-37 | 0.2589048 | 0.634     | 0.491 | 2.79E-33 | 2.5      | ARIH1     | 1.291242363 |
| LINC009701     | 1.17E-37 | 0.1735739 | 0.081     | 0.031 | 2.83E-33 | 2.5      | LINC00970 | 2.612903226 |
| PGR3           | 1.22E-37 | 0.1838615 | 0.15      | 0.073 | 2.93E-33 | 2.5      | PGR       | 2.054794521 |
| DOCK13         | 1.24E-37 | 0.2523957 | 0.404     | 0.276 | 2.99E-33 | 2.5      | DOCK1     | 1.463768116 |
| RP11-371F15.33 | 1.42E-37 | 0.1932175 | 0.154     | 0.077 | 3.43E-33 | 2.5      | RP11-371F | 2           |
| GPRC5C1        | 1.56E-37 | 0.1399184 | 0.062     | 0.02  | 3.77E-33 | 2.5      | GPRC5C    | 3.1         |
| IL6ST3         | 1.73E-37 | 0.2358956 | 0.454     | 0.317 | 4.18E-33 | 2.5      | IL6ST     | 1.432176656 |
| TRIM442        | 1.88E-37 | 0.2350333 | 0.25      | 0.15  | 4.52E-33 | 2.5      | TRIM44    | 1.666666667 |
| DUSP15         | 2.17E-37 | 0.2341067 | 0.305     | 0.193 | 5.24E-33 | 2.5      | DUSP1     | 1.580310881 |
| LPCAT32        | 2.40E-37 | 0.1936467 | 0.127     | 0.059 | 5.79E-33 | 2.5      | LPCAT3    | 2.152542373 |
| CREBRF1        | 2.40E-37 | 0.2621738 | 0.372     | 0.251 | 5.80E-33 | 2.5      | CREBRF    | 1.482071713 |
| PKHD11         | 2.48E-37 | 0.1834268 | 0.099     | 0.041 | 5.97E-33 | 2.5      | PKHD1     | 2.414634146 |
| TTC142         | 2.58E-37 | 0.2048983 | 0.133     | 0.064 | 6.23E-33 | 2.5      | TTC14     | 2.078125    |
| NARS22         | 3.26E-37 | 0.1996127 | 0.127     | 0.06  | 7.85E-33 | 2.5      | NARS2     | 2.116666667 |
| SNX272         | 3.29E-37 | 0.2316521 | 0.241     | 0.142 | 7.92E-33 | 2.5      | SNX27     | 1.697183099 |
| APP2           | 4.27E-37 | 0.1857227 | 0.885     | 0.759 | 1.03E-32 | 2.5      | APP       | 1.166007905 |
| HK11           | 4.34E-37 | 0.2262703 | 0.222     | 0.128 | 1.05E-32 | 2.5      | HK1       | 1.734375    |
| CEP2902        | 4.74E-37 | 0.2145325 | 0.134     | 0.065 | 1.14E-32 | 2.5      | CEP290    | 2.061538462 |
| MLF12          | 4.75E-37 | 0.2701199 | 0.352     | 0.232 | 1.14E-32 | 2.5      | MLF1      | 1.517241379 |
| NUDT121        | 5.20E-37 | 0.147965  | 0.087     | 0.034 | 1.25E-32 | 2.5      | NUDT12    | 2.558823529 |
| TBRG11         | 5.37E-37 | 0.1997122 | 0.177     | 0.094 | 1.30E-32 | 2.5      | TBRG1     | 1.882978723 |
|                | Sep-92   | 5.55E-37  | 0.2106082 | 0.215 | 0.122    | 1.34E-32 | Sep-09    | 1.762295082 |
| R3HDM12        | 5.70E-37 | 0.2057926 | 0.12      | 0.055 | 1.37E-32 | 2.5      | R3HDM1    | 2.181818182 |
| STON23         | 6.49E-37 | 0.1445892 | 0.1       | 0.042 | 1.57E-32 | 2.5      | STON2     | 2.380952381 |
| UBE2L61        | 8.82E-37 | 0.2173722 | 0.145     | 0.073 | 2.13E-32 | 2.5      | UBE2L6    | 1.98630137  |
| PATZ11         | 8.87E-37 | 0.1544089 | 0.076     | 0.028 | 2.14E-32 | 2.5      | PATZ1     | 2.714285714 |
| SMAD33         | 1.10E-36 | 0.2182712 | 0.386     | 0.256 | 2.66E-32 | 2.5      | SMAD3     | 1.5078125   |
| KCNC23         | 1.11E-36 | 0.1916301 | 0.079     | 0.03  | 2.68E-32 | 2.5      | KCNC2     | 2.633333333 |
| ACAP22         | 1.12E-36 | 0.2335937 | 0.278     | 0.171 | 2.70E-32 | 2.5      | ACAP2     | 1.625730994 |
| LAMA51         | 1.12E-36 | 0.1172225 | 0.045     | 0.012 | 2.70E-32 | 2.5      | LAMA5     | 3.75        |
| ASAH14         | 1.26E-36 | 0.1830586 | 0.175     | 0.092 | 3.04E-32 | 2.5      | ASAH1     | 1.902173913 |
| ZDHHC211       | 1.52E-36 | 0.1814956 | 0.126     | 0.059 | 3.67E-32 | 2.5      | ZDHHC21   | 2.13559322  |
| PINK12         | 1.53E-36 | 0.1833399 | 0.118     | 0.054 | 3.69E-32 | 2.5      | PINK1     | 2.185185185 |
| TBC1D21        | 2.52E-36 | 0.1321672 | 0.051     | 0.015 | 6.07E-32 | 2.5      | TBC1D2    | 3.4         |
| EHMT11         | 2.71E-36 | 0.2276662 | 0.296     | 0.186 | 6.52E-32 | 2.5      | EHMT1     | 1.591397849 |

|                |          |           |       |       |          |     |           |             |
|----------------|----------|-----------|-------|-------|----------|-----|-----------|-------------|
| MTHFR1         | 3.29E-36 | 0.1435685 | 0.068 | 0.024 | 7.92E-32 | 2.5 | MTHFR     | 2.833333333 |
| EIF4E31        | 3.29E-36 | 0.1637383 | 0.099 | 0.042 | 7.94E-32 | 2.5 | EIF4E3    | 2.357142857 |
| C10orf762      | 5.11E-36 | 0.2517007 | 0.21  | 0.122 | 1.23E-31 | 2.5 | C10orf76  | 1.721311475 |
| RP11-206M11.71 | 7.03E-36 | 0.1611698 | 0.146 | 0.074 | 1.70E-31 | 2.5 | RP11-206v | 1.972972973 |
| NFE2L11        | 8.03E-36 | 0.2240548 | 0.158 | 0.083 | 1.94E-31 | 2.5 | NFE2L1    | 1.903614458 |
| APLP24         | 9.11E-36 | 0.2098381 | 0.393 | 0.262 | 2.20E-31 | 2.5 | APLP2     | 1.5         |
| GDE13          | 9.48E-36 | 0.2300254 | 0.228 | 0.134 | 2.29E-31 | 2.5 | GDE1      | 1.701492537 |
| FBXL33         | 1.02E-35 | 0.1971893 | 0.178 | 0.096 | 2.45E-31 | 2.5 | FBXL3     | 1.854166667 |
| CDK121         | 1.14E-35 | 0.2133285 | 0.193 | 0.108 | 2.76E-31 | 2.5 | CDK12     | 1.787037037 |
| POF1B3         | 1.18E-35 | 0.1032637 | 0.045 | 0.012 | 2.84E-31 | 2.5 | POF1B     | 3.75        |
| SSH22          | 1.33E-35 | 0.2452578 | 0.514 | 0.374 | 3.21E-31 | 2.5 | SSH2      | 1.374331551 |
| AZIN14         | 1.55E-35 | 0.2271896 | 0.303 | 0.192 | 3.74E-31 | 2.5 | AZIN1     | 1.578125    |
| PTPRA1         | 1.70E-35 | 0.2385986 | 0.273 | 0.17  | 4.11E-31 | 2.5 | PTPRA     | 1.605882353 |
| LDAH1          | 1.96E-35 | 0.144838  | 0.077 | 0.029 | 4.72E-31 | 2.5 | LDAH      | 2.655172414 |
| GATA31         | 2.09E-35 | 0.2857847 | 0.286 | 0.181 | 5.04E-31 | 2.5 | GATA3     | 1.580110497 |
| SORT12         | 2.13E-35 | 0.1962222 | 0.229 | 0.134 | 5.14E-31 | 2.5 | SORT1     | 1.708955224 |
| NBPF121        | 2.23E-35 | 0.1939474 | 0.154 | 0.079 | 5.37E-31 | 2.5 | NBPF12    | 1.949367089 |
| PRR133         | 2.25E-35 | 0.2097059 | 0.201 | 0.113 | 5.42E-31 | 2.5 | PRR13     | 1.778761062 |
| TMEM1643       | 2.28E-35 | 0.2137895 | 0.132 | 0.064 | 5.49E-31 | 2.5 | TMEM164   | 2.0625      |
| GALNT73        | 2.30E-35 | 0.2225109 | 0.249 | 0.15  | 5.56E-31 | 2.5 | GALNT7    | 1.66        |
| CEP1622        | 2.38E-35 | 0.1754526 | 0.104 | 0.046 | 5.73E-31 | 2.5 | CEP162    | 2.260869565 |
| PCNA           | 2.65E-35 | 0.1270916 | 0.065 | 0.022 | 6.38E-31 | 2.5 | PCNA      | 2.954545455 |
| VTCN13         | 3.34E-35 | 0.2647104 | 0.181 | 0.099 | 8.06E-31 | 2.5 | VTCN1     | 1.828282828 |
| RBM231         | 3.42E-35 | 0.2139405 | 0.167 | 0.089 | 8.25E-31 | 2.5 | RBM23     | 1.876404494 |
| GAN2           | 3.55E-35 | 0.2337095 | 0.287 | 0.18  | 8.56E-31 | 2.5 | GAN       | 1.594444444 |
| KMO            | 3.57E-35 | 0.149525  | 0.063 | 0.022 | 8.62E-31 | 2.5 | KMO       | 2.863636364 |
| KIAA12172      | 4.40E-35 | 0.1245249 | 0.922 | 0.784 | 1.06E-30 | 2.5 | KIAA1217  | 1.176020408 |
| ANXA52         | 4.55E-35 | 0.2079939 | 0.491 | 0.348 | 1.10E-30 | 2.5 | ANXA5     | 1.41091954  |
| TINCR1         | 5.30E-35 | 0.1285877 | 0.051 | 0.015 | 1.28E-30 | 2.5 | TINCR     | 3.4         |
| NLK            | 5.60E-35 | 0.2072192 | 0.196 | 0.11  | 1.35E-30 | 2.5 | NLK       | 1.781818182 |
| HP1BP32        | 5.70E-35 | 0.2626383 | 0.309 | 0.203 | 1.37E-30 | 2.5 | HP1BP3    | 1.522167488 |
| NUP1601        | 5.91E-35 | 0.2311843 | 0.214 | 0.124 | 1.42E-30 | 2.5 | NUP160    | 1.725806452 |
| C14orf1192     | 6.65E-35 | 0.2493449 | 0.292 | 0.188 | 1.60E-30 | 2.5 | C14orf119 | 1.553191489 |
| TSPAN32        | 6.98E-35 | 0.1602772 | 0.136 | 0.067 | 1.68E-30 | 2.5 | TSPAN3    | 2.029850746 |
| PARN2          | 8.15E-35 | 0.2117162 | 0.146 | 0.075 | 1.97E-30 | 2.5 | PARN      | 1.946666667 |
| PTPRR2         | 8.35E-35 | 0.1781593 | 0.086 | 0.035 | 2.01E-30 | 2.5 | PTPRR     | 2.457142857 |
| ERBB23         | 9.07E-35 | 0.198117  | 0.193 | 0.108 | 2.19E-30 | 2.5 | ERBB2     | 1.787037037 |
| SYT171         | 1.03E-34 | 0.1766199 | 0.114 | 0.052 | 2.48E-30 | 2.5 | SYT17     | 2.192307692 |
| CD1511         | 1.12E-34 | 0.2393521 | 0.096 | 0.041 | 2.70E-30 | 2.5 | CD151     | 2.341463415 |
| GNAQ3          | 1.13E-34 | 0.231643  | 0.419 | 0.296 | 2.73E-30 | 2.5 | GNAQ      | 1.415540541 |
| NUPR11         | 1.14E-34 | 0.3095126 | 0.252 | 0.155 | 2.75E-30 | 2.5 | NUPR1     | 1.625806452 |
| GDF151         | 1.20E-34 | 0.1790971 | 0.076 | 0.029 | 2.88E-30 | 2.5 | GDF15     | 2.620689655 |
| FRYL2          | 1.27E-34 | 0.1805349 | 0.525 | 0.38  | 3.06E-30 | 2.5 | FRYL      | 1.381578947 |
| ISCU1          | 1.46E-34 | 0.1732068 | 0.116 | 0.054 | 3.52E-30 | 2.5 | ISCU      | 2.148148148 |
| DNAJC152       | 1.62E-34 | 0.207621  | 0.127 | 0.062 | 3.90E-30 | 2.5 | DNAJC15   | 2.048387097 |
| RAB11FIP42     | 1.62E-34 | 0.1480183 | 0.09  | 0.037 | 3.90E-30 | 2.5 | RAB11FIP4 | 2.432432432 |
| FAM83E1        | 1.76E-34 | 0.1483913 | 0.062 | 0.021 | 4.25E-30 | 2.5 | FAM83E    | 2.952380952 |
| CLNS1A2        | 2.69E-34 | 0.213182  | 0.157 | 0.083 | 6.49E-30 | 2.5 | CLNS1A    | 1.891566265 |
| ZNF2543        | 3.31E-34 | 0.2347489 | 0.245 | 0.15  | 7.98E-30 | 2.5 | ZNF254    | 1.633333333 |
| TTBK23         | 3.45E-34 | 0.2412508 | 0.243 | 0.147 | 8.32E-30 | 2.5 | TTBK2     | 1.653061224 |
| CPPED11        | 3.70E-34 | 0.1416355 | 0.063 | 0.022 | 8.93E-30 | 2.5 | CPPED1    | 2.863636364 |
| TSPAN154       | 3.91E-34 | 0.1687931 | 0.176 | 0.094 | 9.42E-30 | 2.5 | TSPAN15   | 1.872340426 |

|                |          |           |       |       |          |     |           |             |
|----------------|----------|-----------|-------|-------|----------|-----|-----------|-------------|
| NAALADL2-AS21  | 4.16E-34 | 0.111935  | 0.049 | 0.014 | 1.00E-29 | 2.5 | NAALADL2- | 3.5         |
| TRIB12         | 4.81E-34 | 0.2207092 | 0.321 | 0.21  | 1.16E-29 | 2.5 | TRIB1     | 1.528571429 |
| RRP12          | 5.39E-34 | 0.2284943 | 0.151 | 0.079 | 1.30E-29 | 2.5 | RRP12     | 1.911392405 |
| ATP2B12        | 5.56E-34 | 0.1736569 | 0.16  | 0.084 | 1.34E-29 | 2.5 | ATP2B1    | 1.904761905 |
| ADNP1          | 6.46E-34 | 0.2333691 | 0.479 | 0.346 | 1.56E-29 | 2.5 | ADNP      | 1.384393064 |
| ALDH3A22       | 6.74E-34 | 0.1517906 | 0.092 | 0.039 | 1.62E-29 | 2.5 | ALDH3A2   | 2.358974359 |
| SCAF111        | 7.40E-34 | 0.2700263 | 0.412 | 0.293 | 1.78E-29 | 2.5 | SCAF11    | 1.406143345 |
| SPPL2A2        | 7.83E-34 | 0.2646599 | 0.366 | 0.25  | 1.89E-29 | 2.5 | SPPL2A    | 1.464       |
| PEBP13         | 7.93E-34 | 0.2328538 | 0.261 | 0.161 | 1.91E-29 | 2.5 | PEBP1     | 1.621118012 |
| RP11-455P21.31 | 8.12E-34 | 0.1554634 | 0.073 | 0.028 | 1.96E-29 | 2.5 | RP11-455P | 2.607142857 |
| ARL34          | 8.38E-34 | 0.217377  | 0.366 | 0.244 | 2.02E-29 | 2.5 | ARL3      | 1.5         |
| RRM2B1         | 8.40E-34 | 0.1491013 | 0.084 | 0.034 | 2.03E-29 | 2.5 | RRM2B     | 2.470588235 |
| HNRNPF2        | 9.39E-34 | 0.2283278 | 0.243 | 0.149 | 2.26E-29 | 2.5 | HNRNPF    | 1.630872483 |
| SMG61          | 9.46E-34 | 0.2175781 | 0.273 | 0.172 | 2.28E-29 | 2.5 | SMG6      | 1.587209302 |
| CAPN23         | 9.49E-34 | 0.1959584 | 0.405 | 0.277 | 2.29E-29 | 2.5 | CAPN2     | 1.462093863 |
| ZMYM22         | 9.89E-34 | 0.2279092 | 0.479 | 0.348 | 2.38E-29 | 2.5 | ZMYM2     | 1.376436782 |
| CCDC301        | 1.06E-33 | 0.1568089 | 0.077 | 0.03  | 2.56E-29 | 2.5 | CCDC30    | 2.566666667 |
| FAF12          | 1.19E-33 | 0.2453215 | 0.326 | 0.219 | 2.88E-29 | 2.5 | FAF1      | 1.488584475 |
| ALDH1A21       | 1.23E-33 | 0.1709908 | 0.096 | 0.042 | 2.95E-29 | 2.5 | ALDH1A2   | 2.285714286 |
| HOMER14        | 1.27E-33 | 0.1659409 | 0.19  | 0.105 | 3.07E-29 | 2.5 | HOMER1    | 1.80952381  |
| KIAA15222      | 1.34E-33 | 0.2386435 | 0.326 | 0.216 | 3.24E-29 | 2.5 | KIAA1522  | 1.509259259 |
| CASP42         | 1.36E-33 | 0.2596719 | 0.335 | 0.226 | 3.28E-29 | 2.5 | CASP4     | 1.482300885 |
| ATP6AP24       | 1.36E-33 | 0.1974648 | 0.226 | 0.133 | 3.29E-29 | 2.5 | ATP6AP2   | 1.69924812  |
| GTDC11         | 1.42E-33 | 0.2156327 | 0.175 | 0.096 | 3.41E-29 | 2.5 | GTDC1     | 1.822916667 |
| ABHD52         | 1.47E-33 | 0.2222564 | 0.31  | 0.201 | 3.54E-29 | 2.5 | ABHD5     | 1.542288557 |
| YBX31          | 1.75E-33 | 0.2643805 | 0.388 | 0.273 | 4.22E-29 | 2.5 | YBX3      | 1.421245421 |
| RHOBTB11       | 1.77E-33 | 0.1341607 | 0.083 | 0.034 | 4.26E-29 | 2.5 | RHOBTB1   | 2.441176471 |
| TACC22         | 2.16E-33 | 0.250122  | 0.244 | 0.152 | 5.20E-29 | 2.5 | TACC2     | 1.605263158 |
| ANKFN1         | 2.35E-33 | 0.1275153 | 0.042 | 0.011 | 5.67E-29 | 2.5 | ANKFN1    | 3.818181818 |
| CDK82          | 2.62E-33 | 0.2656914 | 0.339 | 0.228 | 6.33E-29 | 2.5 | CDK8      | 1.486842105 |
| CAB393         | 2.70E-33 | 0.2664916 | 0.472 | 0.347 | 6.52E-29 | 2.5 | CAB39     | 1.360230548 |
| PLIN32         | 2.88E-33 | 0.2262124 | 0.241 | 0.147 | 6.96E-29 | 2.5 | PLIN3     | 1.639455782 |
| SUSD63         | 2.97E-33 | 0.2459694 | 0.386 | 0.265 | 7.17E-29 | 2.5 | SUSD6     | 1.456603774 |
| SLC12A61       | 3.23E-33 | 0.1628575 | 0.092 | 0.039 | 7.79E-29 | 2.5 | SLC12A6   | 2.358974359 |
| MED13L2        | 3.26E-33 | 0.2054678 | 0.8   | 0.673 | 7.86E-29 | 2.5 | MED13L    | 1.188707281 |
| EZR3           | 3.37E-33 | 0.2500582 | 0.494 | 0.362 | 8.14E-29 | 2.5 | EZR       | 1.364640884 |
| DHRS72         | 3.66E-33 | 0.2036064 | 0.156 | 0.083 | 8.81E-29 | 2.5 | DHRS7     | 1.879518072 |
| GPATCH21       | 3.67E-33 | 0.1894475 | 0.17  | 0.092 | 8.86E-29 | 2.5 | GPATCH2   | 1.847826087 |
| KIF3C1         | 3.96E-33 | 0.1637751 | 0.08  | 0.032 | 9.55E-29 | 2.5 | KIF3C     | 2.5         |
| GTPBP101       | 4.63E-33 | 0.2074351 | 0.193 | 0.11  | 1.12E-28 | 2.5 | GTPBP10   | 1.754545455 |
| RAP1GDS13      | 4.75E-33 | 0.2518302 | 0.2   | 0.116 | 1.15E-28 | 2.5 | RAP1GDS1  | 1.724137931 |
| INHBB1         | 5.08E-33 | 0.1855469 | 0.082 | 0.034 | 1.22E-28 | 2.5 | INHBB     | 2.411764706 |
| PBX32          | 5.23E-33 | 0.1978512 | 0.154 | 0.081 | 1.26E-28 | 2.5 | PBX3      | 1.901234568 |
| CBFA2T21       | 5.41E-33 | 0.2454357 | 0.252 | 0.157 | 1.30E-28 | 2.5 | CBFA2T2   | 1.605095541 |
| C1orf2281      | 5.41E-33 | 0.2633371 | 0.092 | 0.04  | 1.30E-28 | 2.5 | C1orf228  | 2.3         |
| CDC25B2        | 5.53E-33 | 0.1397696 | 0.072 | 0.028 | 1.33E-28 | 2.5 | CDC25B    | 2.571428571 |
| IKBKB2         | 5.76E-33 | 0.190625  | 0.251 | 0.154 | 1.39E-28 | 2.5 | IKBKB     | 1.62987013  |
| CEP1922        | 6.08E-33 | 0.1959575 | 0.186 | 0.105 | 1.47E-28 | 2.5 | CEP192    | 1.771428571 |
| PTPN42         | 6.08E-33 | 0.2083442 | 0.148 | 0.078 | 1.47E-28 | 2.5 | PTPN4     | 1.897435897 |
| FANCI1         | 6.82E-33 | 0.1455556 | 0.072 | 0.028 | 1.64E-28 | 2.5 | FANCI     | 2.571428571 |
| ATRX2          | 8.52E-33 | 0.2125763 | 0.603 | 0.465 | 2.05E-28 | 2.5 | ATRX      | 1.296774194 |
| CEP1282        | 1.34E-32 | 0.1797025 | 0.116 | 0.055 | 3.24E-28 | 2.5 | CEP128    | 2.109090909 |

|               |          |           |       |       |          |     |           |             |
|---------------|----------|-----------|-------|-------|----------|-----|-----------|-------------|
| MMS22L1       | 1.58E-32 | 0.1354224 | 0.066 | 0.024 | 3.80E-28 | 2.5 | MMS22L    | 2.75        |
| SNX132        | 2.06E-32 | 0.1923864 | 0.184 | 0.104 | 4.96E-28 | 2.5 | SNX13     | 1.769230769 |
| RP11-16D22.21 | 2.15E-32 | 0.1607422 | 0.068 | 0.025 | 5.18E-28 | 2.5 | RP11-16D2 | 2.72        |
| TAOK33        | 2.25E-32 | 0.2298005 | 0.587 | 0.458 | 5.42E-28 | 2.5 | TAOK3     | 1.281659389 |
| ZZZ32         | 2.31E-32 | 0.2118621 | 0.256 | 0.161 | 5.58E-28 | 2.5 | ZZZ3      | 1.590062112 |
| PDLIM11       | 2.54E-32 | 0.2051824 | 0.194 | 0.111 | 6.12E-28 | 2.5 | PDLIM1    | 1.747747748 |
| AC097721.22   | 2.58E-32 | 0.1505566 | 0.068 | 0.025 | 6.22E-28 | 2.5 | AC097721. | 2.72        |
| CKAP41        | 2.59E-32 | 0.2202306 | 0.297 | 0.194 | 6.24E-28 | 2.5 | CKAP4     | 1.530927835 |
| TRAK11        | 2.88E-32 | 0.2272188 | 0.287 | 0.185 | 6.94E-28 | 2.5 | TRAK1     | 1.551351351 |
| XKR62         | 3.13E-32 | 0.2284506 | 0.237 | 0.146 | 7.55E-28 | 2.5 | XKR6      | 1.623287671 |
| TTC173        | 3.25E-32 | 0.2434216 | 0.399 | 0.282 | 7.84E-28 | 2.5 | TTC17     | 1.414893617 |
| TIPARP1       | 3.28E-32 | 0.2379334 | 0.194 | 0.112 | 7.91E-28 | 2.5 | TIPARP    | 1.732142857 |
| COMMD102      | 3.64E-32 | 0.214905  | 0.293 | 0.19  | 8.77E-28 | 2.5 | COMMD10   | 1.542105263 |
| DIXDC14       | 4.14E-32 | 0.2133638 | 0.188 | 0.107 | 9.98E-28 | 2.5 | DIXDC1    | 1.757009346 |
| TBC1D22A2     | 4.74E-32 | 0.2131901 | 0.234 | 0.143 | 1.14E-27 | 2.5 | TBC1D22A  | 1.636363636 |
| ITGA53        | 4.85E-32 | 0.1700373 | 0.169 | 0.091 | 1.17E-27 | 2.5 | ITGA5     | 1.857142857 |
| LAPTM4A4      | 4.88E-32 | 0.2025828 | 0.442 | 0.313 | 1.18E-27 | 2.5 | LAPTM4A   | 1.412140575 |
| NT5DC11       | 5.69E-32 | 0.1919345 | 0.144 | 0.075 | 1.37E-27 | 2.5 | NT5DC1    | 1.92        |
| RAD9A3        | 6.01E-32 | 0.2266952 | 0.176 | 0.099 | 1.45E-27 | 2.5 | RAD9A     | 1.777777778 |
| PIGN1         | 6.16E-32 | 0.1818688 | 0.197 | 0.114 | 1.49E-27 | 2.5 | PIGN      | 1.728070175 |
| CASP73        | 6.34E-32 | 0.2241386 | 0.241 | 0.149 | 1.53E-27 | 2.5 | CASP7     | 1.617449664 |
| LINC004703    | 6.47E-32 | 0.1276019 | 0.046 | 0.013 | 1.56E-27 | 2.5 | LINC00470 | 3.538461538 |
| PLEKHA11      | 6.69E-32 | 0.2085597 | 0.238 | 0.146 | 1.61E-27 | 2.5 | PLEKHA1   | 1.630136986 |
| ST52          | 7.29E-32 | 0.3876855 | 0.44  | 0.327 | 1.76E-27 | 2.5 | ST5       | 1.345565749 |
| FUCA1         | 7.44E-32 | 0.1051173 | 0.04  | 0.011 | 1.79E-27 | 2.5 | FUCA1     | 3.636363636 |
| CCDC148       | 7.94E-32 | 0.1864384 | 0.095 | 0.042 | 1.92E-27 | 2.5 | CCDC148   | 2.261904762 |
| AKAP113       | 8.03E-32 | 0.151708  | 0.098 | 0.044 | 1.94E-27 | 2.5 | AKAP11    | 2.227272727 |
| GSPT14        | 9.04E-32 | 0.1777513 | 0.496 | 0.351 | 2.18E-27 | 2.5 | GSPT1     | 1.413105413 |
| STRN32        | 9.12E-32 | 0.2252986 | 0.426 | 0.303 | 2.20E-27 | 2.5 | STRN3     | 1.405940594 |
| ELP22         | 9.86E-32 | 0.2199065 | 0.309 | 0.202 | 2.38E-27 | 2.5 | ELP2      | 1.52970297  |
| XRCC43        | 9.86E-32 | 0.1950144 | 0.113 | 0.054 | 2.38E-27 | 2.5 | XRCC4     | 2.092592593 |
| PHC32         | 1.14E-31 | 0.2428693 | 0.25  | 0.159 | 2.76E-27 | 2.5 | PHC3      | 1.572327044 |
| CLASP12       | 1.14E-31 | 0.2098242 | 0.352 | 0.24  | 2.76E-27 | 2.5 | CLASP1    | 1.466666667 |
| ZNF6801       | 1.15E-31 | 0.2040179 | 0.2   | 0.116 | 2.78E-27 | 2.5 | ZNF680    | 1.724137931 |
| STAT31        | 1.18E-31 | 0.2468466 | 0.651 | 0.523 | 2.84E-27 | 2.5 | STAT3     | 1.244741874 |
| NBAT12        | 1.27E-31 | 0.171911  | 0.192 | 0.109 | 3.06E-27 | 2.5 | NBAT1     | 1.76146789  |
| CEP3501       | 1.34E-31 | 0.2516141 | 0.308 | 0.206 | 3.22E-27 | 2.5 | CEP350    | 1.495145631 |
| TBK1          | 1.51E-31 | 0.2423717 | 0.397 | 0.28  | 3.64E-27 | 2.5 | TBK1      | 1.417857143 |
| ECHDC22       | 2.03E-31 | 0.214355  | 0.192 | 0.112 | 4.90E-27 | 2.5 | ECHDC2    | 1.714285714 |
| MCM91         | 2.10E-31 | 0.1988165 | 0.113 | 0.054 | 5.05E-27 | 2.5 | MCM9      | 2.092592593 |
| MCM32         | 2.38E-31 | 0.1280684 | 0.068 | 0.026 | 5.73E-27 | 2.5 | MCM3      | 2.615384615 |
| LONP21        | 2.38E-31 | 0.2004973 | 0.319 | 0.212 | 5.74E-27 | 2.5 | LONP2     | 1.504716981 |
| MLLT102       | 2.71E-31 | 0.2290599 | 0.237 | 0.147 | 6.54E-27 | 2.5 | MLLT10    | 1.612244898 |
| CELSR11       | 2.84E-31 | 0.1604111 | 0.102 | 0.047 | 6.84E-27 | 2.5 | CELSR1    | 2.170212766 |
| EVL1          | 2.99E-31 | 0.1769278 | 0.122 | 0.061 | 7.21E-27 | 2.5 | EVL       | 2           |
| FAM182B       | 3.37E-31 | 0.1470118 | 0.08  | 0.033 | 8.12E-27 | 2.5 | FAM182B   | 2.424242424 |
| HSPB14        | 3.40E-31 | 0.1816979 | 0.115 | 0.055 | 8.19E-27 | 2.5 | HSPB1     | 2.090909091 |
| ATG72         | 3.41E-31 | 0.2109494 | 0.302 | 0.2   | 8.22E-27 | 2.5 | ATG7      | 1.51        |
| HKR1          | 3.44E-31 | 0.1642406 | 0.127 | 0.064 | 8.31E-27 | 2.5 | HKR1      | 1.984375    |
| HSD17B111     | 3.66E-31 | 0.132284  | 0.08  | 0.033 | 8.83E-27 | 2.5 | HSD17B11  | 2.424242424 |
| MAFB3         | 3.80E-31 | 0.1310036 | 0.096 | 0.043 | 9.17E-27 | 2.5 | MAFB      | 2.23255814  |
| DLG13         | 4.18E-31 | 0.1973415 | 0.628 | 0.489 | 1.01E-26 | 2.5 | DLG1      | 1.284253579 |

|             |          |           |       |       |          |     |           |             |
|-------------|----------|-----------|-------|-------|----------|-----|-----------|-------------|
| PPP2R5A3    | 4.24E-31 | 0.2311498 | 0.239 | 0.15  | 1.02E-26 | 2.5 | PPP2R5A   | 1.593333333 |
| SMURF12     | 4.36E-31 | 0.2281187 | 0.48  | 0.352 | 1.05E-26 | 2.5 | SMURF1    | 1.363636364 |
| CTCF1       | 4.56E-31 | 0.2141855 | 0.165 | 0.092 | 1.10E-26 | 2.5 | CTCF      | 1.793478261 |
| BBS43       | 4.71E-31 | 0.1559528 | 0.111 | 0.053 | 1.14E-26 | 2.5 | BBS4      | 2.094339623 |
| PHF202      | 5.75E-31 | 0.2247809 | 0.469 | 0.341 | 1.39E-26 | 2.5 | PHF20     | 1.375366569 |
| C5orf422    | 6.02E-31 | 0.1612776 | 0.098 | 0.044 | 1.45E-26 | 2.5 | C5orf42   | 2.227272727 |
| NKTR1       | 6.76E-31 | 0.2286623 | 0.427 | 0.307 | 1.63E-26 | 2.5 | NKTR      | 1.390879479 |
| RALGPS11    | 8.16E-31 | 0.1528941 | 0.113 | 0.054 | 1.97E-26 | 2.5 | RALGPS1   | 2.092592593 |
| TMEM87B2    | 8.19E-31 | 0.2097179 | 0.193 | 0.113 | 1.98E-26 | 2.5 | TMEM87B   | 1.707964602 |
| FAM208B2    | 8.90E-31 | 0.2309006 | 0.33  | 0.223 | 2.15E-26 | 2.5 | FAM208B   | 1.479820628 |
| STK33       | 9.03E-31 | 0.206218  | 0.49  | 0.363 | 2.18E-26 | 2.5 | STK3      | 1.349862259 |
| LIN7A2      | 1.00E-30 | 0.1463853 | 0.093 | 0.041 | 2.42E-26 | 2.5 | LIN7A     | 2.268292683 |
| NEO11       | 1.08E-30 | 0.1937848 | 0.162 | 0.089 | 2.61E-26 | 2.5 | NEO1      | 1.820224719 |
| S1PR32      | 1.28E-30 | 0.1158029 | 0.065 | 0.024 | 3.08E-26 | 2.5 | S1PR3     | 2.708333333 |
| CDK132      | 1.32E-30 | 0.2824725 | 0.53  | 0.41  | 3.19E-26 | 2.5 | CDK13     | 1.292682927 |
| BAALC-AS11  | 1.41E-30 | 0.1447049 | 0.063 | 0.023 | 3.41E-26 | 2.5 | BAALC-AS1 | 2.739130435 |
| NDUFS2      | 1.43E-30 | 0.1389103 | 0.122 | 0.06  | 3.44E-26 | 2.5 | NDUFS2    | 2.033333333 |
| CEP1522     | 1.70E-30 | 0.1286913 | 0.076 | 0.031 | 4.10E-26 | 2.5 | CEP152    | 2.451612903 |
| PCCA2       | 1.73E-30 | 0.1838105 | 0.29  | 0.188 | 4.16E-26 | 2.5 | PCCA      | 1.542553191 |
| TBC1D2B1    | 1.82E-30 | 0.1464293 | 0.078 | 0.032 | 4.39E-26 | 2.5 | TBC1D2B   | 2.4375      |
| NSUN61      | 1.86E-30 | 0.2004668 | 0.169 | 0.095 | 4.48E-26 | 2.5 | NSUN6     | 1.778947368 |
| SEMA5A      | 1.87E-30 | 0.1334844 | 0.053 | 0.018 | 4.52E-26 | 2.5 | SEMA5A    | 2.944444444 |
| MARC21      | 2.29E-30 | 0.1332183 | 0.067 | 0.025 | 5.53E-26 | 2.5 | MARC2     | 2.68        |
| IQCE1       | 2.37E-30 | 0.1118912 | 0.054 | 0.018 | 5.72E-26 | 2.5 | IQCE      | 3           |
| RHOT11      | 2.63E-30 | 0.2077256 | 0.163 | 0.091 | 6.33E-26 | 2.5 | RHOT1     | 1.791208791 |
| SERINC21    | 3.22E-30 | 0.213836  | 0.165 | 0.092 | 7.75E-26 | 2.5 | SERINC2   | 1.793478261 |
| USP491      | 3.36E-30 | 0.1388337 | 0.081 | 0.034 | 8.11E-26 | 2.5 | USP49     | 2.382352941 |
| MR11        | 3.94E-30 | 0.1591537 | 0.095 | 0.043 | 9.50E-26 | 2.5 | MR1       | 2.209302326 |
| PTP4A12     | 3.95E-30 | 0.2242475 | 0.386 | 0.271 | 9.53E-26 | 2.5 | PTP4A1    | 1.424354244 |
| STOM3       | 3.98E-30 | 0.3391881 | 0.353 | 0.25  | 9.59E-26 | 2.5 | STOM      | 1.412       |
| BRD8        | 3.99E-30 | 0.1663369 | 0.15  | 0.081 | 9.63E-26 | 2.5 | BRD8      | 1.851851852 |
| STK241      | 4.18E-30 | 0.2231057 | 0.264 | 0.17  | 1.01E-25 | 2.5 | STK24     | 1.552941176 |
| TRIB22      | 4.82E-30 | 0.1740687 | 0.102 | 0.048 | 1.16E-25 | 2.5 | TRIB2     | 2.125       |
| AUTS23      | 4.92E-30 | 0.2215925 | 0.641 | 0.513 | 1.19E-25 | 2.5 | AUTS2     | 1.249512671 |
| ZNF2352     | 4.97E-30 | 0.1910215 | 0.131 | 0.068 | 1.20E-25 | 2.5 | ZNF235    | 1.926470588 |
| CYP20A12    | 5.08E-30 | 0.1958674 | 0.14  | 0.074 | 1.22E-25 | 2.5 | CYP20A1   | 1.891891892 |
| UBE2E21     | 5.15E-30 | 0.2294362 | 0.567 | 0.435 | 1.24E-25 | 2.5 | UBE2E2    | 1.303448276 |
| MIRLET7BHG1 | 5.77E-30 | 0.1571482 | 0.089 | 0.039 | 1.39E-25 | 2.5 | MIRLET7B  | 2.282051282 |
| MARK2       | 5.84E-30 | 0.1896832 | 0.197 | 0.116 | 1.41E-25 | 2.5 | MARK2     | 1.698275862 |
| JAK13       | 5.97E-30 | 0.2389318 | 0.52  | 0.392 | 1.44E-25 | 2.5 | JAK1      | 1.326530612 |
| ZFAND62     | 6.27E-30 | 0.1878907 | 0.52  | 0.386 | 1.51E-25 | 2.5 | ZFAND6    | 1.347150259 |
| XPR13       | 6.43E-30 | 0.1957985 | 0.261 | 0.167 | 1.55E-25 | 2.5 | XPR1      | 1.562874251 |
| PDSS22      | 6.98E-30 | 0.2062928 | 0.196 | 0.117 | 1.68E-25 | 2.5 | PDSS2     | 1.675213675 |
| SRP144      | 7.62E-30 | 0.1909616 | 0.924 | 0.867 | 1.84E-25 | 2.5 | SRP14     | 1.065743945 |
| SASS6       | 7.89E-30 | 0.1457962 | 0.076 | 0.032 | 1.90E-25 | 2.5 | SASS6     | 2.375       |
| TMEM2451    | 8.23E-30 | 0.2073042 | 0.193 | 0.114 | 1.98E-25 | 2.5 | TMEM245   | 1.692982456 |
| LRR64       | 8.35E-30 | 0.1388729 | 0.088 | 0.039 | 2.01E-25 | 2.5 | LRR64     | 2.256410256 |
| PVRL23      | 8.37E-30 | 0.2596516 | 0.382 | 0.271 | 2.02E-25 | 2.5 | PVRL2     | 1.409594096 |
| IFT881      | 1.06E-29 | 0.1664412 | 0.111 | 0.054 | 2.56E-25 | 2.5 | IFT88     | 2.055555556 |
| NUP1072     | 1.10E-29 | 0.1931547 | 0.256 | 0.164 | 2.64E-25 | 2.5 | NUP107    | 1.56097561  |
| CCAR12      | 1.32E-29 | 0.217568  | 0.332 | 0.229 | 3.18E-25 | 2.5 | CCAR1     | 1.449781659 |
| DTX3L1      | 1.38E-29 | 0.1387882 | 0.092 | 0.041 | 3.32E-25 | 2.5 | DTX3L     | 2.243902439 |

|           |          |           |       |       |          |     |          |             |
|-----------|----------|-----------|-------|-------|----------|-----|----------|-------------|
| BBS92     | 1.46E-29 | 0.1817565 | 0.124 | 0.063 | 3.52E-25 | 2.5 | BBS9     | 1.968253968 |
| DPY19L12  | 1.47E-29 | 0.1828864 | 0.16  | 0.088 | 3.56E-25 | 2.5 | DPY19L1  | 1.818181818 |
| SC5D4     | 1.57E-29 | 0.2449029 | 0.267 | 0.173 | 3.78E-25 | 2.5 | SC5D     | 1.543352601 |
| CASC42    | 1.64E-29 | 0.2072837 | 0.272 | 0.177 | 3.95E-25 | 2.5 | CASC4    | 1.536723164 |
| NUDT43    | 1.65E-29 | 0.1617642 | 0.129 | 0.066 | 3.97E-25 | 2.5 | NUDT4    | 1.954545455 |
| FILIP1L3  | 1.69E-29 | 0.161048  | 0.182 | 0.104 | 4.08E-25 | 2.5 | FILIP1L  | 1.75        |
| CYP3A51   | 1.73E-29 | 0.2109733 | 0.066 | 0.026 | 4.18E-25 | 2.5 | CYP3A5   | 2.538461538 |
| GRTP1     | 1.78E-29 | 0.1012931 | 0.038 | 0.01  | 4.28E-25 | 2.5 | GRTP1    | 3.8         |
| MTSS1L3   | 1.98E-29 | 0.172619  | 0.107 | 0.052 | 4.77E-25 | 2.5 | MTSS1L   | 2.057692308 |
| PHF142    | 2.04E-29 | 0.2137328 | 0.194 | 0.116 | 4.92E-25 | 2.5 | PHF14    | 1.672413793 |
| PIK3R31   | 2.07E-29 | 0.1441135 | 0.09  | 0.04  | 5.00E-25 | 2.5 | PIK3R3   | 2.25        |
| CDK5RAP21 | 2.09E-29 | 0.1679498 | 0.134 | 0.071 | 5.05E-25 | 2.5 | CDK5RAP2 | 1.887323944 |
| ZNF33A2   | 2.43E-29 | 0.2167013 | 0.303 | 0.204 | 5.86E-25 | 2.5 | ZNF33A   | 1.485294118 |
| TBC1D321  | 2.51E-29 | 0.1553539 | 0.105 | 0.05  | 6.05E-25 | 2.5 | TBC1D32  | 2.1         |
| METTL153  | 2.85E-29 | 0.2143676 | 0.196 | 0.118 | 6.88E-25 | 2.5 | METTL15  | 1.661016949 |
| S100A103  | 3.00E-29 | 0.1965039 | 0.497 | 0.372 | 7.23E-25 | 2.5 | S100A10  | 1.336021505 |
| BTD2      | 3.23E-29 | 0.1637369 | 0.12  | 0.06  | 7.79E-25 | 2.5 | BTD      | 2           |
| HNF4G1    | 3.35E-29 | 0.1232348 | 0.054 | 0.019 | 8.07E-25 | 2.5 | HNF4G    | 2.842105263 |
| DDR13     | 3.38E-29 | 0.1994971 | 0.306 | 0.204 | 8.14E-25 | 2.5 | DDR1     | 1.5         |
| KLF93     | 3.63E-29 | 0.2179171 | 0.23  | 0.143 | 8.75E-25 | 2.5 | KLF9     | 1.608391608 |
| APLF2     | 3.66E-29 | 0.1896261 | 0.172 | 0.098 | 8.81E-25 | 2.5 | APLF     | 1.755102041 |
| HS2ST12   | 3.77E-29 | 0.144516  | 0.079 | 0.033 | 9.10E-25 | 2.5 | HS2ST1   | 2.393939394 |
| DOPEY21   | 3.94E-29 | 0.1468015 | 0.147 | 0.079 | 9.49E-25 | 2.5 | DOPEY2   | 1.860759494 |
| EPB41L53  | 4.29E-29 | 0.1549548 | 0.406 | 0.282 | 1.03E-24 | 2.5 | EPB41L5  | 1.439716312 |
| TUBGCP32  | 4.57E-29 | 0.1273006 | 0.066 | 0.026 | 1.10E-24 | 2.5 | TUBGCP3  | 2.538461538 |
| ECT24     | 4.71E-29 | 0.1628796 | 0.3   | 0.193 | 1.14E-24 | 2.5 | ECT2     | 1.554404145 |
| CD242     | 4.88E-29 | 0.3768893 | 0.68  | 0.566 | 1.18E-24 | 2.5 | CD24     | 1.201413428 |
| RHOQ1     | 5.51E-29 | 0.2271462 | 0.406 | 0.293 | 1.33E-24 | 2.5 | RHOQ     | 1.385665529 |
| WBP1L1    | 5.55E-29 | 0.1856377 | 0.143 | 0.077 | 1.34E-24 | 2.5 | WBP1L    | 1.857142857 |
| SRGAP2C2  | 5.69E-29 | 0.1604407 | 0.134 | 0.071 | 1.37E-24 | 2.5 | SRGAP2C  | 1.887323944 |
| GEM1      | 5.70E-29 | 0.1711755 | 0.096 | 0.044 | 1.37E-24 | 2.5 | GEM      | 2.181818182 |
| ASH1L2    | 6.69E-29 | 0.2367221 | 0.656 | 0.537 | 1.61E-24 | 2.5 | ASH1L    | 1.22160149  |
| DNM3      | 7.33E-29 | 0.1617749 | 0.086 | 0.038 | 1.77E-24 | 2.5 | DNM3     | 2.263157895 |
| REV3L1    | 7.85E-29 | 0.2056793 | 0.379 | 0.266 | 1.89E-24 | 2.5 | REV3L    | 1.42481203  |
| POLA11    | 8.94E-29 | 0.1485986 | 0.096 | 0.045 | 2.15E-24 | 2.5 | POLA1    | 2.133333333 |
| DMXL12    | 9.52E-29 | 0.1928888 | 0.248 | 0.156 | 2.30E-24 | 2.5 | DMXL1    | 1.58974359  |
| OVOL22    | 9.93E-29 | 0.1775392 | 0.114 | 0.057 | 2.39E-24 | 2.5 | OVOL2    | 2           |
| GLUD13    | 1.01E-28 | 0.1937803 | 0.378 | 0.263 | 2.43E-24 | 2.5 | GLUD1    | 1.437262357 |
| MTMR6     | 1.02E-28 | 0.1617314 | 0.112 | 0.055 | 2.45E-24 | 2.5 | MTMR6    | 2.036363636 |
| CMTR22    | 1.07E-28 | 0.1463387 | 0.085 | 0.038 | 2.58E-24 | 2.5 | CMTR2    | 2.236842105 |
| PCNXL43   | 1.07E-28 | 0.1783318 | 0.17  | 0.098 | 2.59E-24 | 2.5 | PCNXL4   | 1.734693878 |
| PRPF31    | 1.28E-28 | 0.2114479 | 0.201 | 0.122 | 3.09E-24 | 2.5 | PRPF3    | 1.647540984 |
| UBL54     | 1.39E-28 | 0.1422675 | 0.634 | 0.492 | 3.35E-24 | 2.5 | UBL5     | 1.288617886 |
| KIF271    | 1.42E-28 | 0.1756707 | 0.124 | 0.064 | 3.42E-24 | 2.5 | KIF27    | 1.9375      |
| MYL63     | 1.52E-28 | 0.1898991 | 0.956 | 0.931 | 3.66E-24 | 2.5 | MYL6     | 1.026852846 |
| CASD11    | 1.65E-28 | 0.1681855 | 0.118 | 0.06  | 3.98E-24 | 2.5 | CASD1    | 1.966666667 |
| TP53I11   | 1.67E-28 | 0.1048578 | 0.053 | 0.018 | 4.04E-24 | 2.5 | TP53I11  | 2.944444444 |
| WSB12     | 1.80E-28 | 0.165461  | 0.502 | 0.375 | 4.35E-24 | 2.5 | WSB1     | 1.338666667 |
| LIMD11    | 1.92E-28 | 0.1671424 | 0.129 | 0.067 | 4.64E-24 | 2.5 | LIMD1    | 1.925373134 |
| ZNF4382   | 2.10E-28 | 0.1901148 | 0.124 | 0.065 | 5.07E-24 | 2.5 | ZNF438   | 1.907692308 |
| PGM21     | 2.23E-28 | 0.1808949 | 0.133 | 0.07  | 5.37E-24 | 2.5 | PGM2     | 1.9         |
| NEK114    | 2.24E-28 | 0.136716  | 0.114 | 0.056 | 5.39E-24 | 2.5 | NEK11    | 2.035714286 |

|                |          |           |       |       |          |     |           |             |
|----------------|----------|-----------|-------|-------|----------|-----|-----------|-------------|
| LRR37A32       | 2.24E-28 | 0.1981382 | 0.175 | 0.102 | 5.41E-24 | 2.5 | LRR37A3   | 1.715686275 |
| TULP41         | 2.63E-28 | 0.1356268 | 0.63  | 0.483 | 6.35E-24 | 2.5 | TULP4     | 1.304347826 |
| SIRT13         | 2.69E-28 | 0.1935939 | 0.167 | 0.095 | 6.49E-24 | 2.5 | SIRT1     | 1.757894737 |
| TSPAN62        | 2.93E-28 | 0.2131595 | 0.257 | 0.167 | 7.06E-24 | 2.5 | TSPAN6    | 1.538922156 |
| KIAA00401      | 2.96E-28 | 0.1704599 | 0.138 | 0.074 | 7.13E-24 | 2.5 | KIAA0040  | 1.864864865 |
| GOLPH32        | 2.97E-28 | 0.2075673 | 0.359 | 0.251 | 7.16E-24 | 2.5 | GOLPH3    | 1.430278884 |
| MAPK83         | 3.63E-28 | 0.1109051 | 0.446 | 0.319 | 8.76E-24 | 2.5 | MAPK8     | 1.398119122 |
| EFCAB141       | 4.32E-28 | 0.176953  | 0.175 | 0.101 | 1.04E-23 | 2.5 | EFCAB14   | 1.732673267 |
| KIAA14681      | 4.51E-28 | 0.1981186 | 0.201 | 0.122 | 1.09E-23 | 2.5 | KIAA1468  | 1.647540984 |
| TTC39A3        | 4.51E-28 | 0.134697  | 0.096 | 0.045 | 1.09E-23 | 2.5 | TTC39A    | 2.133333333 |
| ANAPC133       | 4.56E-28 | 0.2115553 | 0.219 | 0.137 | 1.10E-23 | 2.5 | ANAPC13   | 1.598540146 |
| TNFSF13B2      | 4.63E-28 | 0.1569697 | 0.096 | 0.045 | 1.12E-23 | 2.5 | TNFSF13B  | 2.133333333 |
| RP11-384F7.24  | 5.09E-28 | 0.2357774 | 0.113 | 0.056 | 1.23E-23 | 2.5 | RP11-384F | 2.017857143 |
| PPP1R9A2       | 5.14E-28 | 0.2493959 | 0.228 | 0.146 | 1.24E-23 | 2.5 | PPP1R9A   | 1.561643836 |
| TMEM50A2       | 5.45E-28 | 0.201229  | 0.287 | 0.191 | 1.31E-23 | 2.5 | TMEM50A   | 1.502617801 |
| EVI52          | 5.46E-28 | 0.2014768 | 0.232 | 0.146 | 1.32E-23 | 2.5 | EVI5      | 1.589041096 |
| ABRACL3        | 6.29E-28 | 0.2091664 | 0.532 | 0.407 | 1.52E-23 | 2.5 | ABRACL    | 1.307125307 |
| DENND1A2       | 6.98E-28 | 0.1894476 | 0.36  | 0.251 | 1.68E-23 | 2.5 | DENND1A   | 1.434262948 |
| TRIM66         | 7.13E-28 | 0.1058401 | 0.053 | 0.019 | 1.72E-23 | 2.5 | TRIM66    | 2.789473684 |
| ATE13          | 7.61E-28 | 0.196906  | 0.195 | 0.118 | 1.84E-23 | 2.5 | ATE1      | 1.652542373 |
| ZBTB184        | 8.58E-28 | 0.1361022 | 0.127 | 0.066 | 2.07E-23 | 2.5 | ZBTB18    | 1.924242424 |
| ETFA1          | 8.90E-28 | 0.1837818 | 0.201 | 0.122 | 2.15E-23 | 2.5 | ETFA      | 1.647540984 |
| HHAT1          | 9.89E-28 | 0.1133539 | 0.053 | 0.019 | 2.39E-23 | 2.5 | HHAT      | 2.789473684 |
| TMEM161B-AS12  | 1.07E-27 | 0.215495  | 0.172 | 0.101 | 2.58E-23 | 2.5 | TMEM161B  | 1.702970297 |
| BUB31          | 1.08E-27 | 0.1598379 | 0.15  | 0.083 | 2.61E-23 | 2.5 | BUB3      | 1.807228916 |
| CCDC931        | 1.17E-27 | 0.2026382 | 0.219 | 0.137 | 2.83E-23 | 2.5 | CCDC93    | 1.598540146 |
| TMEM1653       | 1.22E-27 | 0.1681743 | 0.647 | 0.504 | 2.94E-23 | 2.5 | TMEM165   | 1.283730159 |
| PRICKLE2       | 1.24E-27 | 0.1076252 | 0.066 | 0.026 | 3.00E-23 | 2.5 | PRICKLE2  | 2.538461538 |
| RP11-382A20.41 | 1.50E-27 | 0.1245891 | 0.078 | 0.034 | 3.61E-23 | 2.5 | RP11-382A | 2.294117647 |
| KRIT12         | 1.62E-27 | 0.1839675 | 0.179 | 0.106 | 3.89E-23 | 2.5 | KRIT1     | 1.688679245 |
| COPG21         | 1.67E-27 | 0.1367271 | 0.084 | 0.038 | 4.03E-23 | 2.5 | COPG2     | 2.210526316 |
| TNRC181        | 1.69E-27 | 0.1590928 | 0.137 | 0.075 | 4.09E-23 | 2.5 | TNRC18    | 1.826666667 |
| RTN4RL1        | 1.90E-27 | 0.1218081 | 0.054 | 0.019 | 4.59E-23 | 2.5 | RTN4RL1   | 2.842105263 |
| RASD11         | 1.93E-27 | 0.1736172 | 0.103 | 0.051 | 4.66E-23 | 2.5 | RASD1     | 2.019607843 |
| PSMD15         | 2.03E-27 | 0.1902579 | 0.224 | 0.141 | 4.89E-23 | 2.5 | PSMD1     | 1.588652482 |
| PPT12          | 2.05E-27 | 0.1251873 | 0.079 | 0.034 | 4.94E-23 | 2.5 | PPT1      | 2.323529412 |
| RP11-39M21.12  | 2.14E-27 | 0.1527828 | 0.11  | 0.055 | 5.16E-23 | 2.5 | RP11-39M2 | 2           |
| UBL33          | 2.16E-27 | 0.2282115 | 0.285 | 0.191 | 5.22E-23 | 2.5 | UBL3      | 1.492146597 |
| ZNF4871        | 2.33E-27 | 0.1591551 | 0.103 | 0.05  | 5.61E-23 | 2.5 | ZNF487    | 2.06        |
| FCHSD22        | 2.35E-27 | 0.2000205 | 0.2   | 0.122 | 5.66E-23 | 2.5 | FCHSD2    | 1.639344262 |
| EP3003         | 2.66E-27 | 0.2092844 | 0.306 | 0.209 | 6.41E-23 | 2.5 | EP300     | 1.464114833 |
| LCORL1         | 2.72E-27 | 0.2012652 | 0.217 | 0.136 | 6.56E-23 | 2.5 | LCORL     | 1.595588235 |
| AHCYL13        | 2.88E-27 | 0.2126031 | 0.4   | 0.29  | 6.95E-23 | 2.5 | AHCYL1    | 1.379310345 |
| RUFY31         | 3.25E-27 | 0.1912988 | 0.329 | 0.227 | 7.83E-23 | 2.5 | RUFY3     | 1.449339207 |
| ELMSAN1        | 3.59E-27 | 0.1693615 | 0.147 | 0.081 | 8.66E-23 | 2.5 | ELMSAN1   | 1.814814815 |
| ETAA11         | 3.77E-27 | 0.1298329 | 0.073 | 0.031 | 9.09E-23 | 2.5 | ETAA1     | 2.35483871  |
| CACNG42        | 3.87E-27 | 0.1565422 | 0.108 | 0.053 | 9.33E-23 | 2.5 | CACNG4    | 2.037735849 |
| SYNPO1         | 3.93E-27 | 0.1192373 | 0.06  | 0.023 | 9.48E-23 | 2.5 | SYNPO     | 2.608695652 |
| BNIPL2         | 4.44E-27 | 0.1314986 | 0.087 | 0.04  | 1.07E-22 | 2.5 | BNIPL     | 2.175       |
| ZNF4071        | 4.65E-27 | 0.1912911 | 0.214 | 0.133 | 1.12E-22 | 2.5 | ZNF407    | 1.609022556 |
| SDF21          | 4.73E-27 | 0.2006064 | 0.186 | 0.112 | 1.14E-22 | 2.5 | SDF2      | 1.660714286 |
| TMPRSS11E3     | 5.08E-27 | 0.160667  | 0.1   | 0.048 | 1.23E-22 | 2.5 | TMPRSS11E | 2.083333333 |



|           |          |           |       |       |          |     |          |             |
|-----------|----------|-----------|-------|-------|----------|-----|----------|-------------|
| TCF252    | 5.35E-27 | 0.1768095 | 0.198 | 0.12  | 1.29E-22 | 2.5 | TCF25    | 1.65        |
| LLGL21    | 5.36E-27 | 0.1849857 | 0.162 | 0.093 | 1.29E-22 | 2.5 | LLGL2    | 1.741935484 |
| CHCHD73   | 5.67E-27 | 0.166588  | 0.142 | 0.079 | 1.37E-22 | 2.5 | CHCHD7   | 1.797468354 |
| TAP11     | 6.06E-27 | 0.1400658 | 0.083 | 0.037 | 1.46E-22 | 2.5 | TAP1     | 2.243243243 |
| PCDH11    | 6.48E-27 | 0.1243593 | 0.065 | 0.026 | 1.56E-22 | 2.5 | PCDH1    | 2.5         |
| AHCYL21   | 7.04E-27 | 0.1744577 | 0.176 | 0.104 | 1.70E-22 | 2.5 | AHCYL2   | 1.692307692 |
| AVL93     | 7.17E-27 | 0.1961596 | 0.283 | 0.19  | 1.73E-22 | 2.5 | AVL9     | 1.489473684 |
| PTK22     | 7.55E-27 | 0.1639094 | 0.758 | 0.626 | 1.82E-22 | 2.5 | PTK2     | 1.21086262  |
| PARP142   | 7.72E-27 | 0.1944648 | 0.204 | 0.126 | 1.86E-22 | 2.5 | PARP14   | 1.619047619 |
| APOL62    | 8.00E-27 | 0.1956294 | 0.183 | 0.11  | 1.93E-22 | 2.5 | APOL6    | 1.663636364 |
| IFT1221   | 8.54E-27 | 0.1396463 | 0.069 | 0.029 | 2.06E-22 | 2.5 | IFT122   | 2.379310345 |
| SRP93     | 8.73E-27 | 0.1883688 | 0.531 | 0.408 | 2.10E-22 | 2.5 | SRP9     | 1.301470588 |
| MAOA3     | 9.05E-27 | 0.1355836 | 0.106 | 0.052 | 2.18E-22 | 2.5 | MAOA     | 2.038461538 |
| ZNF5682   | 9.77E-27 | 0.1383347 | 0.08  | 0.035 | 2.36E-22 | 2.5 | ZNF568   | 2.285714286 |
| AGL3      | 1.01E-26 | 0.1565292 | 0.086 | 0.039 | 2.44E-22 | 2.5 | AGL      | 2.205128205 |
| ATG16L13  | 1.02E-26 | 0.1210705 | 0.09  | 0.042 | 2.46E-22 | 2.5 | ATG16L1  | 2.142857143 |
| ZNF2262   | 1.12E-26 | 0.1766657 | 0.149 | 0.084 | 2.69E-22 | 2.5 | ZNF226   | 1.773809524 |
| METTL162  | 1.17E-26 | 0.2090081 | 0.255 | 0.168 | 2.82E-22 | 2.5 | METTL16  | 1.517857143 |
| ACSS31    | 1.23E-26 | 0.1015456 | 0.05  | 0.017 | 2.96E-22 | 2.5 | ACSS3    | 2.941176471 |
| CD2741    | 1.23E-26 | 0.1366644 | 0.072 | 0.03  | 2.97E-22 | 2.5 | CD274    | 2.4         |
| ARFIP12   | 1.46E-26 | 0.1839845 | 0.222 | 0.14  | 3.51E-22 | 2.5 | ARFIP1   | 1.585714286 |
| ADAMTS171 | 1.55E-26 | 0.111506  | 0.061 | 0.024 | 3.74E-22 | 2.5 | ADAMTS17 | 2.541666667 |
| PSPC12    | 1.58E-26 | 0.2014092 | 0.272 | 0.181 | 3.80E-22 | 2.5 | PSPC1    | 1.502762431 |
| ZDHHC142  | 1.61E-26 | 0.1743234 | 0.187 | 0.111 | 3.89E-22 | 2.5 | ZDHHC14  | 1.684684685 |
| SAXO23    | 1.64E-26 | 0.1230286 | 0.069 | 0.029 | 3.96E-22 | 2.5 | SAXO2    | 2.379310345 |
| TEAD31    | 1.74E-26 | 0.138902  | 0.106 | 0.052 | 4.19E-22 | 2.5 | TEAD3    | 2.038461538 |
| PIP4K2A3  | 1.80E-26 | 0.122522  | 0.186 | 0.11  | 4.35E-22 | 2.5 | PIP4K2A  | 1.690909091 |
| SDHA1     | 1.81E-26 | 0.1533269 | 0.149 | 0.083 | 4.37E-22 | 2.5 | SDHA     | 1.795180723 |
| IFT432    | 2.05E-26 | 0.1778693 | 0.152 | 0.086 | 4.93E-22 | 2.5 | IFT43    | 1.76744186  |
| CTSZ4     | 2.07E-26 | 0.140334  | 0.115 | 0.059 | 4.99E-22 | 2.5 | CTSZ     | 1.949152542 |
| SUPT20H1  | 2.26E-26 | 0.1584223 | 0.134 | 0.073 | 5.44E-22 | 2.5 | SUPT20H  | 1.835616438 |
| RPAP22    | 2.27E-26 | 0.19755   | 0.285 | 0.189 | 5.47E-22 | 2.5 | RPAP2    | 1.507936508 |
| TBC1D122  | 2.46E-26 | 0.2032013 | 0.134 | 0.072 | 5.92E-22 | 2.5 | TBC1D12  | 1.861111111 |
| DHRX2     | 2.80E-26 | 0.2029947 | 0.371 | 0.265 | 6.76E-22 | 2.5 | DHRX     | 1.4         |
| ANKMY2    | 2.90E-26 | 0.1402043 | 0.083 | 0.038 | 6.99E-22 | 2.5 | ANKMY2   | 2.184210526 |
| AP1M22    | 2.98E-26 | 0.1526626 | 0.133 | 0.072 | 7.20E-22 | 2.5 | AP1M2    | 1.847222222 |
| SLC16A21  | 3.15E-26 | 0.127281  | 0.069 | 0.029 | 7.60E-22 | 2.5 | SLC16A2  | 2.379310345 |
| SCGB2B22  | 3.20E-26 | 0.1601765 | 0.1   | 0.049 | 7.72E-22 | 2.5 | SCGB2B2  | 2.040816327 |
| CCBL22    | 3.46E-26 | 0.1833787 | 0.184 | 0.111 | 8.35E-22 | 2.5 | CCBL2    | 1.657657658 |
| ANKRA21   | 3.65E-26 | 0.1762086 | 0.119 | 0.063 | 8.79E-22 | 2.5 | ANKRA2   | 1.888888889 |
| AHNAK3    | 3.90E-26 | 0.2011008 | 0.456 | 0.343 | 9.41E-22 | 2.5 | AHNAK    | 1.329446064 |
| C2orf691  | 4.53E-26 | 0.1475582 | 0.095 | 0.046 | 1.09E-21 | 2.5 | C2orf69  | 2.065217391 |
| KCNS31    | 4.54E-26 | 0.1264722 | 0.063 | 0.026 | 1.09E-21 | 2.5 | KCNS3    | 2.423076923 |
| ATP1A13   | 4.69E-26 | 0.1999119 | 0.613 | 0.491 | 1.13E-21 | 2.5 | ATP1A1   | 1.248472505 |
| WWC22     | 4.95E-26 | 0.15744   | 0.284 | 0.187 | 1.19E-21 | 2.5 | WWC2     | 1.518716578 |
| TXNDC121  | 5.08E-26 | 0.1603029 | 0.119 | 0.063 | 1.23E-21 | 2.5 | TXNDC12  | 1.888888889 |
| KIAA03681 | 5.38E-26 | 0.2098671 | 0.331 | 0.234 | 1.30E-21 | 2.5 | KIAA0368 | 1.414529915 |
| PARP13    | 5.42E-26 | 0.1780126 | 0.169 | 0.1   | 1.31E-21 | 2.5 | PARP1    | 1.69        |
| HIST1H4H2 | 5.96E-26 | 0.1765968 | 0.129 | 0.07  | 1.44E-21 | 2.5 | HIST1H4H | 1.842857143 |
| MACROD22  | 6.21E-26 | 0.2573599 | 0.326 | 0.231 | 1.50E-21 | 2.5 | MACROD2  | 1.411255411 |
| PGRMC22   | 6.32E-26 | 0.1537881 | 0.198 | 0.12  | 1.52E-21 | 2.5 | PGRMC2   | 1.65        |
| TBC1D43   | 6.65E-26 | 0.217487  | 0.276 | 0.185 | 1.60E-21 | 2.5 | TBC1D4   | 1.491891892 |

|                |          |           |       |       |          |     |             |             |
|----------------|----------|-----------|-------|-------|----------|-----|-------------|-------------|
| CCDC641        | 7.27E-26 | 0.1717917 | 0.1   | 0.05  | 1.75E-21 | 2.5 | CCDC64      | 2           |
| AF127936.93    | 7.32E-26 | 0.1493673 | 0.22  | 0.136 | 1.76E-21 | 2.5 | AF127936.93 | 1.617647059 |
| PTER1          | 7.57E-26 | 0.1306101 | 0.094 | 0.045 | 1.82E-21 | 2.5 | PTER        | 2.088888889 |
| ZC3H62         | 8.99E-26 | 0.1670377 | 0.126 | 0.068 | 2.17E-21 | 2.5 | ZC3H6       | 1.852941176 |
| RPA32          | 9.09E-26 | 0.1744474 | 0.208 | 0.131 | 2.19E-21 | 2.5 | RPA3        | 1.58778626  |
| SLC20A13       | 9.16E-26 | 0.1656247 | 0.115 | 0.059 | 2.21E-21 | 2.5 | SLC20A1     | 1.949152542 |
| ALMS11         | 9.75E-26 | 0.1111388 | 0.059 | 0.023 | 2.35E-21 | 2.5 | ALMS1       | 2.565217391 |
| LRR691         | 1.01E-25 | 0.1701593 | 0.096 | 0.047 | 2.44E-21 | 2.5 | LRR69       | 2.042553191 |
| DPH63          | 1.07E-25 | 0.1778727 | 0.115 | 0.06  | 2.57E-21 | 2.5 | DPH6        | 1.916666667 |
| UNC13B2        | 1.15E-25 | 0.1419109 | 0.133 | 0.072 | 2.77E-21 | 2.5 | UNC13B      | 1.847222222 |
| RB1CC12        | 1.18E-25 | 0.1825134 | 0.6   | 0.466 | 2.83E-21 | 2.5 | RB1CC1      | 1.287553648 |
| ATM2           | 1.18E-25 | 0.1528996 | 0.115 | 0.06  | 2.85E-21 | 2.5 | ATM         | 1.916666667 |
| AK32           | 1.28E-25 | 0.1923479 | 0.29  | 0.196 | 3.08E-21 | 2.5 | AK3         | 1.479591837 |
| TOB11          | 1.33E-25 | 0.1842431 | 0.182 | 0.11  | 3.21E-21 | 2.5 | TOB1        | 1.654545455 |
| RAI142         | 1.39E-25 | 0.1669749 | 0.247 | 0.161 | 3.35E-21 | 2.5 | RAI14       | 1.534161491 |
| RP11-418J17.11 | 1.45E-25 | 0.1545026 | 0.087 | 0.041 | 3.50E-21 | 2.5 | RP11-418J1  | 2.12195122  |
| ATIC           | 1.66E-25 | 0.1184881 | 0.068 | 0.028 | 4.00E-21 | 2.5 | ATIC        | 2.428571429 |
| HSDL11         | 1.68E-25 | 0.108395  | 0.074 | 0.032 | 4.06E-21 | 2.5 | HSDL1       | 2.3125      |
| MCCC23         | 1.89E-25 | 0.1696133 | 0.232 | 0.149 | 4.55E-21 | 2.5 | MCCC2       | 1.55704698  |
| DDX3X2         | 2.10E-25 | 0.1748975 | 0.467 | 0.35  | 5.06E-21 | 2.5 | DDX3X       | 1.334285714 |
| CTB-171A8.11   | 2.40E-25 | 0.1681708 | 0.148 | 0.085 | 5.79E-21 | 2.5 | CTB-171A8   | 1.741176471 |
| HAUS11         | 2.49E-25 | 0.1482827 | 0.117 | 0.062 | 6.01E-21 | 2.5 | HAUS1       | 1.887096774 |
| SMARCC13       | 2.80E-25 | 0.1957213 | 0.383 | 0.278 | 6.76E-21 | 2.5 | SMARCC1     | 1.377697842 |
| CETN22         | 2.86E-25 | 0.1641296 | 0.262 | 0.172 | 6.90E-21 | 2.5 | CETN2       | 1.523255814 |
| LGALS31        | 2.90E-25 | 0.1931627 | 0.287 | 0.195 | 6.99E-21 | 2.5 | LGALS3      | 1.471794872 |
| WDR781         | 2.94E-25 | 0.1424625 | 0.075 | 0.034 | 7.10E-21 | 2.5 | WDR78       | 2.205882353 |
| SETDB22        | 2.99E-25 | 0.1247252 | 0.066 | 0.028 | 7.22E-21 | 2.5 | SETDB2      | 2.357142857 |
| LRP101         | 3.03E-25 | 0.1746027 | 0.203 | 0.127 | 7.31E-21 | 2.5 | LRP10       | 1.598425197 |
| MCUR12         | 3.05E-25 | 0.1516773 | 0.108 | 0.055 | 7.35E-21 | 2.5 | MCUR1       | 1.963636364 |
| KLF124         | 3.48E-25 | 0.1374366 | 0.22  | 0.138 | 8.39E-21 | 2.5 | KLF12       | 1.594202899 |
| XIAP1          | 3.49E-25 | 0.1843448 | 0.204 | 0.128 | 8.42E-21 | 2.5 | XIAP        | 1.59375     |
| GNS4           | 3.55E-25 | 0.1607241 | 0.15  | 0.085 | 8.57E-21 | 2.5 | GNS         | 1.764705882 |
| ADSS           | 3.63E-25 | 0.1220787 | 0.075 | 0.033 | 8.76E-21 | 2.5 | ADSS        | 2.272727273 |
| SRBD11         | 3.75E-25 | 0.1684221 | 0.111 | 0.057 | 9.05E-21 | 2.5 | SRBD1       | 1.947368421 |
| FAM179B2       | 3.87E-25 | 0.1802125 | 0.139 | 0.078 | 9.34E-21 | 2.5 | FAM179B     | 1.782051282 |
| FAM32A2        | 3.88E-25 | 0.160376  | 0.136 | 0.076 | 9.35E-21 | 2.5 | FAM32A      | 1.789473684 |
| B4GALT11       | 3.94E-25 | 0.2308072 | 0.542 | 0.426 | 9.50E-21 | 2.5 | B4GALT1     | 1.272300469 |
| CDYL3          | 4.70E-25 | 0.1668043 | 0.413 | 0.299 | 1.13E-20 | 2.5 | CDYL        | 1.381270903 |
| ZNF2481        | 4.74E-25 | 0.1523917 | 0.098 | 0.049 | 1.14E-20 | 2.5 | ZNF248      | 2           |
| NOSTRIN3       | 5.00E-25 | 0.1088258 | 0.071 | 0.03  | 1.21E-20 | 2.5 | NOSTRIN     | 2.366666667 |
| GNG12-AS11     | 5.02E-25 | 0.1669116 | 0.131 | 0.073 | 1.21E-20 | 2.5 | GNG12-AS1   | 1.794520548 |
| CHMP2A2        | 5.40E-25 | 0.1573862 | 0.148 | 0.084 | 1.30E-20 | 2.5 | CHMP2A      | 1.761904762 |
| PCAT11         | 5.61E-25 | 0.1167154 | 0.055 | 0.021 | 1.35E-20 | 2.5 | PCAT1       | 2.619047619 |
| USP542         | 5.93E-25 | 0.2203876 | 0.608 | 0.481 | 1.43E-20 | 2.5 | USP54       | 1.264033264 |
| NSD12          | 6.92E-25 | 0.1852355 | 0.189 | 0.118 | 1.67E-20 | 2.5 | NSD1        | 1.601694915 |
| AAGAB          | 7.63E-25 | 0.1875366 | 0.217 | 0.139 | 1.84E-20 | 2.5 | AAGAB       | 1.561151079 |
| SLC9A12        | 7.81E-25 | 0.1854346 | 0.186 | 0.114 | 1.88E-20 | 2.5 | SLC9A1      | 1.631578947 |
| ZC3HAV13       | 7.92E-25 | 0.1837877 | 0.268 | 0.179 | 1.91E-20 | 2.5 | ZC3HAV1     | 1.497206704 |
| MARCH21        | 8.01E-25 | 0.1333447 | 0.083 | 0.038 | 1.93E-20 | 2.5 | MARCH2      | 2.184210526 |
| JMY1           | 8.68E-25 | 0.1923491 | 0.196 | 0.123 | 2.09E-20 | 2.5 | JMY         | 1.593495935 |
| SPPL32         | 8.86E-25 | 0.1693859 | 0.356 | 0.253 | 2.14E-20 | 2.5 | SPPL3       | 1.407114625 |
| KANSL31        | 9.05E-25 | 0.142682  | 0.135 | 0.075 | 2.18E-20 | 2.5 | KANSL3      | 1.8         |

|               |          |           |       |       |          |     |           |             |
|---------------|----------|-----------|-------|-------|----------|-----|-----------|-------------|
| TNS32         | 9.48E-25 | 0.1515648 | 0.119 | 0.064 | 2.29E-20 | 2.5 | TNS3      | 1.859375    |
| MFSD113       | 9.55E-25 | 0.1705355 | 0.151 | 0.088 | 2.30E-20 | 2.5 | MFSD11    | 1.715909091 |
| PAK41         | 1.04E-24 | 0.133071  | 0.084 | 0.04  | 2.50E-20 | 2.5 | PAK4      | 2.1         |
| GLB1          | 1.09E-24 | 0.1222962 | 0.084 | 0.039 | 2.64E-20 | 2.5 | GLB1      | 2.153846154 |
| ARHGDIB2      | 1.21E-24 | 0.2232131 | 0.225 | 0.146 | 2.92E-20 | 2.5 | ARHGDIB   | 1.54109589  |
| NR4A23        | 1.23E-24 | 0.1961948 | 0.171 | 0.103 | 2.96E-20 | 2.5 | NR4A2     | 1.660194175 |
| PPP2R3C1      | 1.31E-24 | 0.1694524 | 0.168 | 0.101 | 3.17E-20 | 2.5 | PPP2R3C   | 1.663366337 |
| CHFR1         | 1.56E-24 | 0.1578179 | 0.144 | 0.082 | 3.75E-20 | 2.5 | CHFR      | 1.756097561 |
| TEAD23        | 1.64E-24 | 0.1574847 | 0.125 | 0.069 | 3.95E-20 | 2.5 | TEAD2     | 1.811594203 |
| ACSL12        | 1.65E-24 | 0.2142016 | 0.281 | 0.194 | 3.98E-20 | 2.5 | ACSL1     | 1.448453608 |
| ZMYND111      | 2.19E-24 | 0.1710322 | 0.21  | 0.133 | 5.27E-20 | 2.5 | ZMYND11   | 1.578947368 |
| UEVLD2        | 2.29E-24 | 0.1475384 | 0.12  | 0.065 | 5.53E-20 | 2.5 | UEVLD     | 1.846153846 |
| C3orf142      | 2.38E-24 | 0.1338528 | 0.176 | 0.106 | 5.74E-20 | 2.5 | C3orf14   | 1.660377358 |
| EPB41L4B2     | 2.47E-24 | 0.1676511 | 0.244 | 0.161 | 5.96E-20 | 2.5 | EPB41L4B  | 1.51552795  |
| DPYD-AS12     | 2.63E-24 | 0.1495747 | 0.126 | 0.069 | 6.34E-20 | 2.5 | DPYD-AS1  | 1.826086957 |
| PANK34        | 2.75E-24 | 0.1336523 | 0.257 | 0.168 | 6.64E-20 | 2.5 | PANK3     | 1.529761905 |
| DAZAP22       | 2.76E-24 | 0.1816196 | 0.529 | 0.411 | 6.66E-20 | 2.5 | DAZAP2    | 1.287104623 |
| C4orf323      | 3.08E-24 | 0.1484723 | 0.163 | 0.096 | 7.43E-20 | 2.5 | C4orf32   | 1.697916667 |
| RP5-1101C3.12 | 3.15E-24 | 0.1350272 | 0.104 | 0.054 | 7.60E-20 | 2.5 | RP5-1101C | 1.925925926 |
| ATP6AP12      | 3.35E-24 | 0.1373755 | 0.097 | 0.049 | 8.08E-20 | 2.5 | ATP6AP1   | 1.979591837 |
| ATP6V0D11     | 3.55E-24 | 0.1263665 | 0.096 | 0.048 | 8.55E-20 | 2.5 | ATP6V0D1  | 2           |
| WNK13         | 3.82E-24 | 0.1794851 | 0.327 | 0.231 | 9.22E-20 | 2.5 | WNK1      | 1.415584416 |
| SENP21        | 4.00E-24 | 0.1923414 | 0.184 | 0.114 | 9.63E-20 | 2.5 | SENP2     | 1.614035088 |
| IQCD1         | 4.09E-24 | 0.1105465 | 0.051 | 0.019 | 9.87E-20 | 2.5 | IQCD      | 2.684210526 |
| SHPRH2        | 4.14E-24 | 0.1626431 | 0.143 | 0.083 | 9.98E-20 | 2.5 | SHPRH     | 1.722891566 |
| C16orf461     | 4.67E-24 | 0.1121614 | 0.058 | 0.023 | 1.13E-19 | 2.5 | C16orf46  | 2.52173913  |
| CTNND13       | 4.70E-24 | 0.1720801 | 0.501 | 0.382 | 1.13E-19 | 2.5 | CTNND1    | 1.311518325 |
| TMEM87A2      | 5.44E-24 | 0.1746351 | 0.489 | 0.371 | 1.31E-19 | 2.5 | TMEM87A   | 1.318059299 |
| EMC103        | 5.46E-24 | 0.1486581 | 0.105 | 0.054 | 1.32E-19 | 2.5 | EMC10     | 1.944444444 |
| NCOR12        | 6.08E-24 | 0.1604601 | 0.529 | 0.408 | 1.47E-19 | 2.5 | NCOR1     | 1.296568627 |
| SLC39A12      | 6.10E-24 | 0.1844546 | 0.162 | 0.097 | 1.47E-19 | 2.5 | SLC39A1   | 1.670103093 |
| RPS6KC11      | 6.24E-24 | 0.1785218 | 0.167 | 0.101 | 1.50E-19 | 2.5 | RPS6KC1   | 1.653465347 |
| SVIP2         | 6.29E-24 | 0.125596  | 0.087 | 0.042 | 1.52E-19 | 2.5 | SVIP      | 2.071428571 |
| PSD4          | 6.43E-24 | 0.1063638 | 0.051 | 0.019 | 1.55E-19 | 2.5 | PSD4      | 2.684210526 |
| NPC23         | 6.76E-24 | 0.1895077 | 0.589 | 0.47  | 1.63E-19 | 2.5 | NPC2      | 1.253191489 |
| TRIM383       | 7.22E-24 | 0.1484937 | 0.154 | 0.091 | 1.74E-19 | 2.5 | TRIM38    | 1.692307692 |
| SPATA6L2      | 7.40E-24 | 0.1241561 | 0.108 | 0.056 | 1.78E-19 | 2.5 | SPATA6L   | 1.928571429 |
| NIN3          | 7.44E-24 | 0.157486  | 0.161 | 0.096 | 1.79E-19 | 2.5 | NIN       | 1.677083333 |
| NBR12         | 7.70E-24 | 0.1959487 | 0.245 | 0.164 | 1.86E-19 | 2.5 | NBR1      | 1.493902439 |
| AASDH2        | 7.70E-24 | 0.132071  | 0.097 | 0.049 | 1.86E-19 | 2.5 | AASDH     | 1.979591837 |
| IGFBP24       | 8.57E-24 | 0.13561   | 0.091 | 0.044 | 2.07E-19 | 2.5 | IGFBP2    | 2.068181818 |
| SAMD81        | 9.85E-24 | 0.1435602 | 0.158 | 0.093 | 2.38E-19 | 2.5 | SAMD8     | 1.698924731 |
| ANKMY1        | 9.99E-24 | 0.1072016 | 0.05  | 0.018 | 2.41E-19 | 2.5 | ANKMY1    | 2.777777778 |
| GDAP21        | 1.02E-23 | 0.1437506 | 0.106 | 0.055 | 2.46E-19 | 2.5 | GDAP2     | 1.927272727 |
| GPR137C1      | 1.03E-23 | 0.1840599 | 0.132 | 0.074 | 2.49E-19 | 2.5 | GPR137C   | 1.783783784 |
| CYB5R12       | 1.11E-23 | 0.1160771 | 0.065 | 0.027 | 2.68E-19 | 2.5 | CYB5R1    | 2.407407407 |
| ODF2L2        | 1.15E-23 | 0.1666809 | 0.228 | 0.149 | 2.78E-19 | 2.5 | ODF2L     | 1.530201342 |
| RHOH2         | 1.23E-23 | 0.1063854 | 0.066 | 0.028 | 2.96E-19 | 2.5 | RHOH      | 2.357142857 |
| DNAJC161      | 1.23E-23 | 0.1229568 | 0.113 | 0.06  | 2.98E-19 | 2.5 | DNAJC16   | 1.883333333 |
| ATG2B         | 1.25E-23 | 0.1162558 | 0.077 | 0.036 | 3.03E-19 | 2.5 | ATG2B     | 2.138888889 |
| PPM1K4        | 1.25E-23 | 0.1887509 | 0.219 | 0.141 | 3.03E-19 | 2.5 | PPM1K     | 1.553191489 |
| NINL1         | 1.36E-23 | 0.1302806 | 0.066 | 0.029 | 3.29E-19 | 2.5 | NINL      | 2.275862069 |

|                |          |           |       |       |          |     |            |             |
|----------------|----------|-----------|-------|-------|----------|-----|------------|-------------|
| PEBP44         | 1.42E-23 | 0.1594209 | 0.152 | 0.088 | 3.43E-19 | 2.5 | PEBP4      | 1.727272727 |
| INIP           | 1.63E-23 | 0.1487874 | 0.127 | 0.07  | 3.94E-19 | 2.5 | INIP       | 1.814285714 |
| RHOB3          | 1.64E-23 | 0.1159465 | 0.173 | 0.104 | 3.95E-19 | 2.5 | RHOB       | 1.663461538 |
| ERBB31         | 1.68E-23 | 0.1620587 | 0.197 | 0.124 | 4.05E-19 | 2.5 | ERBB3      | 1.588709677 |
| HOOK22         | 1.69E-23 | 0.1636585 | 0.225 | 0.147 | 4.07E-19 | 2.5 | HOOK2      | 1.530612245 |
| MAPKAP12       | 1.73E-23 | 0.1707617 | 0.171 | 0.104 | 4.17E-19 | 2.5 | MAPKAP1    | 1.644230769 |
| PVRL42         | 1.89E-23 | 0.1839968 | 0.268 | 0.182 | 4.55E-19 | 2.5 | PVRL4      | 1.472527473 |
| ALG131         | 1.91E-23 | 0.1593863 | 0.177 | 0.108 | 4.60E-19 | 2.5 | ALG13      | 1.638888889 |
| AC016831.72    | 1.97E-23 | 0.1423334 | 0.346 | 0.245 | 4.75E-19 | 2.5 | AC016831.  | 1.412244898 |
| CFL13          | 1.99E-23 | 0.217755  | 0.409 | 0.305 | 4.81E-19 | 2.5 | CFL1       | 1.340983607 |
| C11orf491      | 2.07E-23 | 0.1798596 | 0.225 | 0.147 | 4.99E-19 | 2.5 | C11orf49   | 1.530612245 |
| STAU21         | 2.23E-23 | 0.1599176 | 0.166 | 0.1   | 5.38E-19 | 2.5 | STAU2      | 1.66        |
| SBF22          | 2.27E-23 | 0.1550268 | 0.752 | 0.621 | 5.47E-19 | 2.5 | SBF2       | 1.210950081 |
| ZNF273         | 2.34E-23 | 0.1216674 | 0.071 | 0.032 | 5.65E-19 | 2.5 | ZNF273     | 2.21875     |
| YPEL22         | 2.48E-23 | 0.1882981 | 0.176 | 0.107 | 5.97E-19 | 2.5 | YPEL2      | 1.644859813 |
| PDE11A1        | 2.72E-23 | 0.1120951 | 0.069 | 0.031 | 6.56E-19 | 2.5 | PDE11A     | 2.225806452 |
| NUP62CL1       | 2.75E-23 | 0.1097132 | 0.049 | 0.018 | 6.64E-19 | 2.5 | NUP62CL    | 2.722222222 |
| RNF1492        | 3.03E-23 | 0.1597321 | 0.446 | 0.335 | 7.31E-19 | 2.5 | RNF149     | 1.331343284 |
| WWC13          | 3.09E-23 | 0.2781542 | 0.509 | 0.407 | 7.45E-19 | 2.5 | WWC1       | 1.250614251 |
| RP11-437B10.11 | 3.16E-23 | 0.1339765 | 0.508 | 0.388 | 7.61E-19 | 2.5 | RP11-437B  | 1.309278351 |
| NSMCE22        | 3.37E-23 | 0.1852029 | 0.473 | 0.369 | 8.13E-19 | 2.5 | NSMCE2     | 1.281842818 |
| CAPN133        | 3.52E-23 | 0.1253712 | 0.074 | 0.033 | 8.49E-19 | 2.5 | CAPN13     | 2.242424242 |
| SYCP22         | 3.57E-23 | 0.1247796 | 0.076 | 0.035 | 8.62E-19 | 2.5 | SYCP2      | 2.171428571 |
| GALNT101       | 4.14E-23 | 0.1420811 | 0.104 | 0.054 | 9.99E-19 | 2.5 | GALNT10    | 1.925925926 |
| GBP32          | 4.33E-23 | 0.185482  | 0.205 | 0.132 | 1.04E-18 | 2.5 | GBP3       | 1.553030303 |
| ATR2           | 4.44E-23 | 0.1920398 | 0.202 | 0.13  | 1.07E-18 | 2.5 | ATR        | 1.553846154 |
| ZNF7182        | 4.50E-23 | 0.15348   | 0.111 | 0.059 | 1.08E-18 | 2.5 | ZNF718     | 1.881355932 |
| RP11-6N13.13   | 4.61E-23 | 0.2693872 | 0.083 | 0.04  | 1.11E-18 | 2.5 | RP11-6N13  | 2.075       |
| MED312         | 4.63E-23 | 0.1944876 | 0.248 | 0.168 | 1.12E-18 | 2.5 | MED31      | 1.476190476 |
| LGALS11        | 4.75E-23 | 0.2839212 | 0.131 | 0.074 | 1.14E-18 | 2.5 | LGALS1     | 1.77027027  |
| TIGAR1         | 4.88E-23 | 0.1142585 | 0.063 | 0.027 | 1.18E-18 | 2.5 | TIGAR      | 2.333333333 |
| LRRFIP15       | 4.89E-23 | 0.1399879 | 0.745 | 0.614 | 1.18E-18 | 2.5 | LRRFIP1    | 1.213355049 |
| DUSP61         | 4.94E-23 | 0.1305892 | 0.103 | 0.054 | 1.19E-18 | 2.5 | DUSP6      | 1.907407407 |
| FAT12          | 5.30E-23 | 0.1270715 | 0.283 | 0.192 | 1.28E-18 | 2.5 | FAT1       | 1.473958333 |
| ZNF5401        | 5.84E-23 | 0.1321721 | 0.071 | 0.032 | 1.41E-18 | 2.5 | ZNF540     | 2.21875     |
| PRKRA1         | 5.93E-23 | 0.1465952 | 0.137 | 0.079 | 1.43E-18 | 2.5 | PRKRA      | 1.734177215 |
| SGK2231        | 5.96E-23 | 0.159803  | 0.131 | 0.074 | 1.44E-18 | 2.5 | SGK223     | 1.77027027  |
| PHF113         | 7.65E-23 | 0.1631047 | 0.136 | 0.079 | 1.84E-18 | 2.5 | PHF11      | 1.721518987 |
| SEMA3E4        | 7.86E-23 | 0.1209443 | 0.211 | 0.133 | 1.90E-18 | 2.5 | SEMA3E     | 1.586466165 |
| CNST1          | 8.58E-23 | 0.1343954 | 0.115 | 0.062 | 2.07E-18 | 2.5 | CNST       | 1.85483871  |
| HAT12          | 8.63E-23 | 0.1603534 | 0.271 | 0.183 | 2.08E-18 | 2.5 | HAT1       | 1.480874317 |
| TMCO33         | 9.18E-23 | 0.1523388 | 0.204 | 0.129 | 2.21E-18 | 2.5 | TMCO3      | 1.581395349 |
| KLHL132        | 1.03E-22 | 0.2288455 | 0.167 | 0.102 | 2.48E-18 | 2.5 | KLHL13     | 1.637254902 |
| TAF152         | 1.15E-22 | 0.1825628 | 0.379 | 0.282 | 2.77E-18 | 2.5 | TAF15      | 1.343971631 |
| IMMP1L3        | 1.19E-22 | 0.142815  | 0.205 | 0.13  | 2.86E-18 | 2.5 | IMMP1L     | 1.576923077 |
| FAM208A3       | 1.34E-22 | 0.1472316 | 0.137 | 0.079 | 3.22E-18 | 2.5 | FAM208A    | 1.734177215 |
| FBXW42         | 1.53E-22 | 0.155797  | 0.139 | 0.08  | 3.69E-18 | 2.5 | FBXW4      | 1.7375      |
| ACYP11         | 1.54E-22 | 0.1330768 | 0.135 | 0.077 | 3.72E-18 | 2.5 | ACYP1      | 1.753246753 |
| MREG2          | 1.65E-22 | 0.1589601 | 0.208 | 0.133 | 3.99E-18 | 2.5 | MREG       | 1.563909774 |
| CARS1          | 1.67E-22 | 0.1485376 | 0.172 | 0.106 | 4.03E-18 | 2.5 | CARS       | 1.622641509 |
| AP000769.12    | 1.68E-22 | 0.203927  | 0.198 | 0.126 | 4.06E-18 | 2.5 | AP000769.  | 1.571428571 |
| CTC-260E6.61   | 1.79E-22 | 0.1195063 | 0.095 | 0.049 | 4.33E-18 | 2.5 | CTC-260E6. | 1.93877551  |

|             |          |           |       |       |          |     |          |             |
|-------------|----------|-----------|-------|-------|----------|-----|----------|-------------|
| CSGALNACT22 | 1.90E-22 | 0.146346  | 0.19  | 0.118 | 4.59E-18 | 2.5 | CSGALNAC | 1.610169492 |
| MVP2        | 2.01E-22 | 0.1647506 | 0.106 | 0.057 | 4.83E-18 | 2.5 | MVP      | 1.859649123 |
| UBE4B2      | 2.23E-22 | 0.1373569 | 0.321 | 0.228 | 5.37E-18 | 2.5 | UBE4B    | 1.407894737 |
| NOS1AP3     | 2.41E-22 | 0.1507857 | 0.295 | 0.207 | 5.81E-18 | 2.5 | NOS1AP   | 1.425120773 |
| STEAP12     | 2.55E-22 | 0.1327568 | 0.093 | 0.047 | 6.14E-18 | 2.5 | STEAP1   | 1.978723404 |
| SYT71       | 2.58E-22 | 0.1584284 | 0.09  | 0.045 | 6.22E-18 | 2.5 | SYT7     | 2           |
| MTOR2       | 2.60E-22 | 0.1324438 | 0.098 | 0.051 | 6.26E-18 | 2.5 | MTOR     | 1.921568627 |
| CITED22     | 2.60E-22 | 0.1543603 | 0.11  | 0.059 | 6.27E-18 | 2.5 | CITED2   | 1.86440678  |
| NPTN3       | 2.68E-22 | 0.1607268 | 0.273 | 0.186 | 6.47E-18 | 2.5 | NPTN     | 1.467741935 |
| RFWD24      | 2.71E-22 | 0.1589981 | 0.393 | 0.288 | 6.54E-18 | 2.5 | RFWD2    | 1.364583333 |
| HEATR5A2    | 2.94E-22 | 0.1477062 | 0.108 | 0.058 | 7.09E-18 | 2.5 | HEATR5A  | 1.862068966 |
| TLK12       | 2.97E-22 | 0.1610554 | 0.269 | 0.185 | 7.16E-18 | 2.5 | TLK1     | 1.454054054 |
| MAP1LC3B3   | 3.10E-22 | 0.1598892 | 0.222 | 0.145 | 7.48E-18 | 2.5 | MAP1LC3B | 1.531034483 |
| PIK3CA2     | 3.39E-22 | 0.1787497 | 0.376 | 0.275 | 8.17E-18 | 2.5 | PIK3CA   | 1.367272727 |
| PRKDC2      | 3.84E-22 | 0.1867245 | 0.165 | 0.101 | 9.25E-18 | 2.5 | PRKDC    | 1.633663366 |
| HIVEP33     | 3.90E-22 | 0.1727018 | 0.404 | 0.305 | 9.39E-18 | 2.5 | HIVEP3   | 1.324590164 |
| ARID21      | 4.03E-22 | 0.1833106 | 0.4   | 0.298 | 9.71E-18 | 2.5 | ARID2    | 1.342281879 |
| HMGB14      | 4.15E-22 | 0.168122  | 0.655 | 0.529 | 1.00E-17 | 2.5 | HMGB1    | 1.238185255 |
| CREBBP2     | 4.16E-22 | 0.1528732 | 0.392 | 0.288 | 1.00E-17 | 2.5 | CREBBP   | 1.361111111 |
| OLA12       | 4.20E-22 | 0.1586233 | 0.419 | 0.312 | 1.01E-17 | 2.5 | OLA1     | 1.342948718 |
| NUMA12      | 4.40E-22 | 0.1319873 | 0.116 | 0.063 | 1.06E-17 | 2.5 | NUMA1    | 1.841269841 |
| EMC71       | 4.41E-22 | 0.1256718 | 0.092 | 0.047 | 1.06E-17 | 2.5 | EMC7     | 1.957446809 |
| UBXN43      | 4.81E-22 | 0.1721251 | 0.4   | 0.299 | 1.16E-17 | 2.5 | UBXN4    | 1.337792642 |
| BORCS5      | 5.21E-22 | 0.1265752 | 0.11  | 0.06  | 1.26E-17 | 2.5 | BORCS5   | 1.833333333 |
| JAK22       | 5.43E-22 | 0.1223926 | 0.159 | 0.096 | 1.31E-17 | 2.5 | JAK2     | 1.65625     |
| PDHX2       | 6.05E-22 | 0.1315113 | 0.124 | 0.07  | 1.46E-17 | 2.5 | PDHX     | 1.771428571 |
| DYNC1LI21   | 6.28E-22 | 0.1683855 | 0.31  | 0.221 | 1.52E-17 | 2.5 | DYNC1LI2 | 1.402714932 |
| C11orf542   | 6.56E-22 | 0.1583888 | 0.158 | 0.097 | 1.58E-17 | 2.5 | C11orf54 | 1.628865979 |
| APMAP1      | 6.61E-22 | 0.139214  | 0.094 | 0.048 | 1.59E-17 | 2.5 | APMAP    | 1.958333333 |
| GUSB4       | 6.88E-22 | 0.1173346 | 0.084 | 0.041 | 1.66E-17 | 2.5 | GUSB     | 2.048780488 |
| ZBTB8OS2    | 7.66E-22 | 0.166333  | 0.217 | 0.143 | 1.85E-17 | 2.5 | ZBTB8OS  | 1.517482517 |
| UBE2B1      | 7.75E-22 | 0.1789989 | 0.352 | 0.258 | 1.87E-17 | 2.5 | UBE2B    | 1.364341085 |
| MAP2K44     | 8.55E-22 | 0.1914667 | 0.542 | 0.43  | 2.06E-17 | 2.5 | MAP2K4   | 1.260465116 |
| SLC35B21    | 9.30E-22 | 0.1044503 | 0.053 | 0.021 | 2.24E-17 | 2.5 | SLC35B2  | 2.523809524 |
| FIG41       | 9.30E-22 | 0.1032554 | 0.061 | 0.026 | 2.24E-17 | 2.5 | FIG4     | 2.346153846 |
| PIKFYVE2    | 9.35E-22 | 0.1570686 | 0.178 | 0.111 | 2.26E-17 | 2.5 | PIKFYVE  | 1.603603604 |
| PHIP2       | 9.81E-22 | 0.1776326 | 0.538 | 0.428 | 2.37E-17 | 2.5 | PHIP     | 1.257009346 |
| ATG102      | 1.09E-21 | 0.1710814 | 0.208 | 0.136 | 2.64E-17 | 2.5 | ATG10    | 1.529411765 |
| CDKN1B1     | 1.27E-21 | 0.1551856 | 0.13  | 0.075 | 3.07E-17 | 2.5 | CDKN1B   | 1.733333333 |
| YTHDC21     | 1.34E-21 | 0.1216111 | 0.084 | 0.042 | 3.22E-17 | 2.5 | YTHDC2   | 2           |
| GRN2        | 1.51E-21 | 0.1086882 | 0.071 | 0.033 | 3.64E-17 | 2.5 | GRN      | 2.151515152 |
| ABC71       | 1.54E-21 | 0.1357677 | 0.124 | 0.07  | 3.72E-17 | 2.5 | ABC7     | 1.771428571 |
| FNDC3A1     | 1.59E-21 | 0.2108293 | 0.46  | 0.358 | 3.84E-17 | 2.5 | FNDC3A   | 1.284916201 |
| ZNF2743     | 1.76E-21 | 0.1571299 | 0.138 | 0.082 | 4.23E-17 | 2.5 | ZNF274   | 1.682926829 |
| NFYC1       | 1.78E-21 | 0.1137969 | 0.075 | 0.035 | 4.30E-17 | 2.5 | NFYC     | 2.142857143 |
| ICE22       | 1.80E-21 | 0.1326626 | 0.09  | 0.046 | 4.33E-17 | 2.5 | ICE2     | 1.956521739 |
| SLC1A2      | 1.90E-21 | 0.1023425 | 0.042 | 0.015 | 4.58E-17 | 2.5 | SLC1A2   | 2.8         |
| C2CD32      | 2.10E-21 | 0.1405017 | 0.113 | 0.062 | 5.06E-17 | 2.5 | C2CD3    | 1.822580645 |
| FAM134C1    | 2.44E-21 | 0.1302242 | 0.092 | 0.047 | 5.89E-17 | 2.5 | FAM134C  | 1.957446809 |
| CCDC1701    | 2.90E-21 | 0.1371989 | 0.098 | 0.051 | 7.00E-17 | 2.5 | CCDC170  | 1.921568627 |
| BBX2        | 3.08E-21 | 0.1615371 | 0.499 | 0.387 | 7.42E-17 | 2.5 | BBX      | 1.289405685 |
| C14orf12    | 3.22E-21 | 0.1648027 | 0.124 | 0.071 | 7.76E-17 | 2.5 | C14orf1  | 1.746478873 |

|           |          |           |       |       |          |     |          |             |
|-----------|----------|-----------|-------|-------|----------|-----|----------|-------------|
| DOCK91    | 3.46E-21 | 0.1422621 | 0.299 | 0.21  | 8.34E-17 | 2.5 | DOCK9    | 1.423809524 |
| POLR2G3   | 3.68E-21 | 0.1691819 | 0.242 | 0.165 | 8.89E-17 | 2.5 | POLR2G   | 1.466666667 |
| NANS1     | 3.70E-21 | 0.1475756 | 0.081 | 0.04  | 8.91E-17 | 2.5 | NANS     | 2.025       |
| ZNF280D2  | 3.71E-21 | 0.1580359 | 0.14  | 0.083 | 8.94E-17 | 2.5 | ZNF280D  | 1.686746988 |
| KPNA32    | 3.98E-21 | 0.1453244 | 0.189 | 0.12  | 9.59E-17 | 2.5 | KPNA3    | 1.575       |
| CNNM22    | 4.05E-21 | 0.155947  | 0.112 | 0.062 | 9.78E-17 | 2.5 | CNNM2    | 1.806451613 |
| POLR2K2   | 4.43E-21 | 0.1495915 | 0.466 | 0.356 | 1.07E-16 | 2.5 | POLR2K   | 1.308988764 |
| LAMP14    | 4.74E-21 | 0.1378661 | 0.151 | 0.09  | 1.14E-16 | 2.5 | LAMP1    | 1.677777778 |
| GTF3C22   | 4.75E-21 | 0.1487635 | 0.119 | 0.068 | 1.15E-16 | 2.5 | GTF3C2   | 1.75        |
| NEDD95    | 5.04E-21 | 0.1502095 | 0.469 | 0.359 | 1.21E-16 | 2.5 | NEDD9    | 1.306406685 |
| FANCC2    | 5.22E-21 | 0.1695598 | 0.189 | 0.121 | 1.26E-16 | 2.5 | FANCC    | 1.561983471 |
| EXTL31    | 5.81E-21 | 0.1670151 | 0.145 | 0.088 | 1.40E-16 | 2.5 | EXTL3    | 1.647727273 |
| SNX292    | 5.92E-21 | 0.1296999 | 0.151 | 0.091 | 1.43E-16 | 2.5 | SNX29    | 1.659340659 |
| MAPK142   | 5.98E-21 | 0.1771095 | 0.218 | 0.147 | 1.44E-16 | 2.5 | MAPK14   | 1.482993197 |
| EPS153    | 6.40E-21 | 0.1733651 | 0.276 | 0.194 | 1.54E-16 | 2.5 | EPS15    | 1.422680412 |
| MESDC2    | 6.50E-21 | 0.1315666 | 0.105 | 0.057 | 1.57E-16 | 2.5 | MESDC2   | 1.842105263 |
| HMGXB41   | 6.79E-21 | 0.165513  | 0.302 | 0.216 | 1.64E-16 | 2.5 | HMGXB4   | 1.398148148 |
| DCTN41    | 7.12E-21 | 0.1759748 | 0.249 | 0.171 | 1.72E-16 | 2.5 | DCTN4    | 1.456140351 |
| ACSF23    | 7.82E-21 | 0.1129924 | 0.07  | 0.033 | 1.89E-16 | 2.5 | ACSF2    | 2.121212121 |
| UBR31     | 8.14E-21 | 0.1393533 | 0.27  | 0.186 | 1.96E-16 | 2.5 | UBR3     | 1.451612903 |
| NFYA2     | 8.32E-21 | 0.1254248 | 0.124 | 0.071 | 2.01E-16 | 2.5 | NFYA     | 1.746478873 |
| MGME11    | 8.67E-21 | 0.1383268 | 0.124 | 0.071 | 2.09E-16 | 2.5 | MGME1    | 1.746478873 |
| NEK93     | 8.77E-21 | 0.1332049 | 0.109 | 0.06  | 2.11E-16 | 2.5 | NEK9     | 1.816666667 |
| SLC36A41  | 8.77E-21 | 0.1366782 | 0.145 | 0.086 | 2.11E-16 | 2.5 | SLC36A4  | 1.686046512 |
| DCP22     | 8.78E-21 | 0.1222081 | 0.249 | 0.168 | 2.12E-16 | 2.5 | DCP2     | 1.482142857 |
| SLC6A63   | 8.96E-21 | 0.1279325 | 0.106 | 0.058 | 2.16E-16 | 2.5 | SLC6A6   | 1.827586207 |
| DNM1L3    | 9.70E-21 | 0.1445826 | 0.177 | 0.112 | 2.34E-16 | 2.5 | DNM1L    | 1.580357143 |
| ZNF694    | 9.73E-21 | 0.1309419 | 0.1   | 0.054 | 2.35E-16 | 2.5 | ZNF69    | 1.851851852 |
| YAP12     | 9.85E-21 | 0.1644219 | 0.64  | 0.52  | 2.38E-16 | 2.5 | YAP1     | 1.230769231 |
| UGGT1     | 1.02E-20 | 0.1134124 | 0.101 | 0.054 | 2.45E-16 | 2.5 | UGGT1    | 1.87037037  |
| SLC25A132 | 1.08E-20 | 0.1469001 | 0.115 | 0.065 | 2.60E-16 | 2.5 | SLC25A13 | 1.769230769 |
| MID21     | 1.10E-20 | 0.1198001 | 0.103 | 0.056 | 2.65E-16 | 2.5 | MID2     | 1.839285714 |
| NETO21    | 1.12E-20 | 0.1252275 | 0.094 | 0.049 | 2.71E-16 | 2.5 | NETO2    | 1.918367347 |
| LRRC4C1   | 1.19E-20 | 0.1379339 | 0.097 | 0.051 | 2.86E-16 | 2.5 | LRRC4C   | 1.901960784 |
| FCF12     | 1.27E-20 | 0.1388859 | 0.11  | 0.061 | 3.07E-16 | 2.5 | FCF1     | 1.803278689 |
| ZMPSTE243 | 1.28E-20 | 0.1173209 | 0.121 | 0.068 | 3.08E-16 | 2.5 | ZMPSTE24 | 1.779411765 |
| HPS41     | 1.44E-20 | 0.1304846 | 0.079 | 0.039 | 3.47E-16 | 2.5 | HPS4     | 2.025641026 |
| MEF2D1    | 1.44E-20 | 0.1380441 | 0.111 | 0.062 | 3.48E-16 | 2.5 | MEF2D    | 1.790322581 |
| PIK3IP12  | 1.50E-20 | 0.1356017 | 0.104 | 0.057 | 3.62E-16 | 2.5 | PIK3IP1  | 1.824561404 |
| CYSTM11   | 1.52E-20 | 0.1708122 | 0.281 | 0.198 | 3.66E-16 | 2.5 | CYSTM1   | 1.419191919 |
| AMMECR11  | 1.71E-20 | 0.1135165 | 0.071 | 0.034 | 4.12E-16 | 2.5 | AMMECR1  | 2.088235294 |
| CACNA1D   | 1.82E-20 | 0.1079173 | 0.043 | 0.016 | 4.38E-16 | 2.5 | CACNA1D  | 2.6875      |
| ELF23     | 1.92E-20 | 0.1570351 | 0.484 | 0.376 | 4.62E-16 | 2.5 | ELF2     | 1.287234043 |
| ARHGEF112 | 1.95E-20 | 0.1497215 | 0.094 | 0.05  | 4.69E-16 | 2.5 | ARHGEF11 | 1.88        |
| RPTOR1    | 2.01E-20 | 0.1236308 | 0.104 | 0.056 | 4.86E-16 | 2.5 | RPTOR    | 1.857142857 |
| HOXA9     | 2.02E-20 | 0.112669  | 0.056 | 0.024 | 4.87E-16 | 2.5 | HOXA9    | 2.333333333 |
| CLTC1     | 2.06E-20 | 0.1529315 | 0.319 | 0.229 | 4.96E-16 | 2.5 | CLTC     | 1.3930131   |
| BLVRA     | 2.24E-20 | 0.1623999 | 0.155 | 0.096 | 5.41E-16 | 2.5 | BLVRA    | 1.614583333 |
| APH1B1    | 2.29E-20 | 0.1127686 | 0.07  | 0.033 | 5.53E-16 | 2.5 | APH1B    | 2.121212121 |
| CCDC1731  | 2.31E-20 | 0.1444069 | 0.112 | 0.063 | 5.57E-16 | 2.5 | CCDC173  | 1.777777778 |
| RFX33     | 2.37E-20 | 0.183643  | 0.233 | 0.16  | 5.70E-16 | 2.5 | RFX3     | 1.45625     |
| ADD33     | 2.43E-20 | 0.1733102 | 0.266 | 0.187 | 5.85E-16 | 2.5 | ADD3     | 1.422459893 |

|                |          |           |       |       |          |     |           |             |
|----------------|----------|-----------|-------|-------|----------|-----|-----------|-------------|
| MARCKSL13      | 2.43E-20 | 0.1060159 | 0.219 | 0.144 | 5.87E-16 | 2.5 | MARCKSL1  | 1.520833333 |
| CFAP432        | 2.48E-20 | 0.1096272 | 0.07  | 0.033 | 5.98E-16 | 2.5 | CFAP43    | 2.121212121 |
| SNX143         | 2.51E-20 | 0.1681593 | 0.175 | 0.111 | 6.05E-16 | 2.5 | SNX14     | 1.576576577 |
| ACP61          | 2.52E-20 | 0.1038137 | 0.059 | 0.026 | 6.08E-16 | 2.5 | ACP6      | 2.269230769 |
| EEF2K1         | 2.95E-20 | 0.1303338 | 0.079 | 0.039 | 7.12E-16 | 2.5 | EEF2K     | 2.025641026 |
| RALGAPB1       | 2.98E-20 | 0.1504761 | 0.216 | 0.144 | 7.20E-16 | 2.5 | RALGAPB   | 1.5         |
| CUL33          | 3.10E-20 | 0.1677638 | 0.498 | 0.391 | 7.47E-16 | 2.5 | CUL3      | 1.273657289 |
| RPN24          | 3.11E-20 | 0.1352325 | 0.355 | 0.257 | 7.50E-16 | 2.5 | RPN2      | 1.381322957 |
| ASTN22         | 3.20E-20 | 0.1421297 | 0.364 | 0.262 | 7.73E-16 | 2.5 | ASTN2     | 1.389312977 |
| MGLL2          | 3.58E-20 | 0.1430976 | 0.257 | 0.175 | 8.64E-16 | 2.5 | MGLL      | 1.468571429 |
| C2CD51         | 3.76E-20 | 0.1042683 | 0.057 | 0.025 | 9.06E-16 | 2.5 | C2CD5     | 2.28        |
| STIM2          | 3.99E-20 | 0.1126112 | 0.068 | 0.032 | 9.62E-16 | 2.5 | STIM2     | 2.125       |
| RP11-123O10.43 | 4.20E-20 | 0.1667236 | 0.285 | 0.203 | 1.01E-15 | 2.5 | RP11-123O | 1.403940887 |
| NPLOC41        | 4.77E-20 | 0.169798  | 0.216 | 0.146 | 1.15E-15 | 2.5 | NPLOC4    | 1.479452055 |
| ZNF7303        | 4.87E-20 | 0.1297502 | 0.133 | 0.078 | 1.17E-15 | 2.5 | ZNF730    | 1.705128205 |
| MAP3K42        | 5.05E-20 | 0.1534444 | 0.186 | 0.12  | 1.22E-15 | 2.5 | MAP3K4    | 1.55        |
| RIC12          | 5.18E-20 | 0.1359347 | 0.245 | 0.168 | 1.25E-15 | 2.5 | RIC1      | 1.458333333 |
| RRAGB1         | 5.19E-20 | 0.1410468 | 0.137 | 0.082 | 1.25E-15 | 2.5 | RRAGB     | 1.670731707 |
| MRPS212        | 5.48E-20 | 0.1620488 | 0.619 | 0.504 | 1.32E-15 | 2.5 | MRPS21    | 1.228174603 |
| C20orf1943     | 5.48E-20 | 0.1567166 | 0.238 | 0.164 | 1.32E-15 | 2.5 | C20orf194 | 1.451219512 |
| C5orf241       | 5.56E-20 | 0.1198997 | 0.09  | 0.047 | 1.34E-15 | 2.5 | C5orf24   | 1.914893617 |
| DTNBP11        | 5.57E-20 | 0.1288189 | 0.111 | 0.062 | 1.34E-15 | 2.5 | DTNBP1    | 1.790322581 |
| C5orf151       | 5.63E-20 | 0.1268863 | 0.128 | 0.075 | 1.36E-15 | 2.5 | C5orf15   | 1.706666667 |
| CHDH2          | 5.89E-20 | 0.139202  | 0.088 | 0.046 | 1.42E-15 | 2.5 | CHDH      | 1.913043478 |
| APOL21         | 6.72E-20 | 0.1200668 | 0.071 | 0.035 | 1.62E-15 | 2.5 | APOL2     | 2.028571429 |
| MTCH22         | 7.40E-20 | 0.1397779 | 0.121 | 0.07  | 1.78E-15 | 2.5 | MTCH2     | 1.728571429 |
| DAXX2          | 7.65E-20 | 0.1292417 | 0.092 | 0.049 | 1.84E-15 | 2.5 | DAXX      | 1.87755102  |
| HSBP1L1        | 8.28E-20 | 0.1084126 | 0.057 | 0.025 | 2.00E-15 | 2.5 | HSBP1L1   | 2.28        |
| HIPK33         | 8.47E-20 | 0.1549343 | 0.261 | 0.183 | 2.04E-15 | 2.5 | HIPK3     | 1.426229508 |
| RND12          | 8.52E-20 | 0.1507537 | 0.131 | 0.077 | 2.06E-15 | 2.5 | RND1      | 1.701298701 |
| MARCH64        | 8.68E-20 | 0.1485237 | 0.499 | 0.388 | 2.09E-15 | 2.5 | MARCH6    | 1.286082474 |
| PURA1          | 8.93E-20 | 0.1452957 | 0.11  | 0.063 | 2.15E-15 | 2.5 | PURA      | 1.746031746 |
| TMEM331        | 9.17E-20 | 0.1407603 | 0.163 | 0.102 | 2.21E-15 | 2.5 | TMEM33    | 1.598039216 |
| RNF1112        | 9.64E-20 | 0.1640235 | 0.345 | 0.254 | 2.33E-15 | 2.5 | RNF111    | 1.358267717 |
| PEMT4          | 9.64E-20 | 0.1771256 | 0.072 | 0.035 | 2.33E-15 | 2.5 | PEMT      | 2.057142857 |
| WWC33          | 1.09E-19 | 0.128521  | 0.125 | 0.073 | 2.63E-15 | 2.5 | WWC3      | 1.712328767 |
| PSMD131        | 1.09E-19 | 0.1407688 | 0.139 | 0.084 | 2.64E-15 | 2.5 | PSMD13    | 1.654761905 |
| GPBP1L12       | 1.13E-19 | 0.1535692 | 0.434 | 0.332 | 2.73E-15 | 2.5 | GPBP1L1   | 1.307228916 |
| SLC10A72       | 1.26E-19 | 0.152207  | 0.093 | 0.05  | 3.05E-15 | 2.5 | SLC10A7   | 1.86        |
| ZNF1381        | 1.44E-19 | 0.1476917 | 0.115 | 0.066 | 3.48E-15 | 2.5 | ZNF138    | 1.742424242 |
| SLC22A53       | 1.47E-19 | 0.1264858 | 0.084 | 0.043 | 3.54E-15 | 2.5 | SLC22A5   | 1.953488372 |
| SPTBN11        | 1.47E-19 | 0.152865  | 0.294 | 0.21  | 3.54E-15 | 2.5 | SPTBN1    | 1.4         |
| DPY19L3        | 1.55E-19 | 0.115928  | 0.071 | 0.035 | 3.73E-15 | 2.5 | DPY19L3   | 2.028571429 |
| AATF2          | 1.72E-19 | 0.129257  | 0.082 | 0.042 | 4.16E-15 | 2.5 | AATF      | 1.952380952 |
| FAM174A2       | 1.73E-19 | 0.1089379 | 0.061 | 0.028 | 4.17E-15 | 2.5 | FAM174A   | 2.178571429 |
| ATXN7L12       | 1.74E-19 | 0.1236376 | 0.105 | 0.059 | 4.20E-15 | 2.5 | ATXN7L1   | 1.779661017 |
| HLA-A2         | 1.86E-19 | 0.1557964 | 0.404 | 0.307 | 4.50E-15 | 2.5 | HLA-A     | 1.315960912 |
| STXBP52        | 1.89E-19 | 0.1464073 | 0.183 | 0.119 | 4.57E-15 | 2.5 | STXBP5    | 1.537815126 |
| SSR1           | 1.92E-19 | 0.1691212 | 0.273 | 0.194 | 4.63E-15 | 2.5 | SSR1      | 1.407216495 |
| UBXN2B1        | 1.98E-19 | 0.1168551 | 0.089 | 0.047 | 4.78E-15 | 2.5 | UBXN2B    | 1.893617021 |
| RP11-420A23.13 | 2.06E-19 | 0.1146287 | 0.081 | 0.041 | 4.96E-15 | 2.5 | RP11-420A | 1.975609756 |
| PTTG1IP1       | 2.33E-19 | 0.1423471 | 0.231 | 0.157 | 5.62E-15 | 2.5 | PTTG1IP   | 1.47133758  |

|           |          |           |       |       |          |     |          |             |
|-----------|----------|-----------|-------|-------|----------|-----|----------|-------------|
| DDX46     | 2.58E-19 | 0.1323669 | 0.165 | 0.105 | 6.22E-15 | 2.5 | DDX46    | 1.571428571 |
| SNAP291   | 2.62E-19 | 0.1064253 | 0.08  | 0.04  | 6.31E-15 | 2.5 | SNAP29   | 2           |
| MDM42     | 2.68E-19 | 0.1841559 | 0.323 | 0.239 | 6.46E-15 | 2.5 | MDM4     | 1.351464435 |
| PPM1L2    | 2.68E-19 | 0.139675  | 0.118 | 0.069 | 6.47E-15 | 2.5 | PPM1L    | 1.710144928 |
| RNF135    | 2.93E-19 | 0.1060213 | 0.06  | 0.027 | 7.07E-15 | 2.5 | RNF135   | 2.222222222 |
| ANAPC53   | 2.93E-19 | 0.130634  | 0.161 | 0.101 | 7.07E-15 | 2.5 | ANAPC5   | 1.594059406 |
| PSAP3     | 3.03E-19 | 0.1460522 | 0.178 | 0.115 | 7.31E-15 | 2.5 | PSAP     | 1.547826087 |
| NUP581    | 3.09E-19 | 0.1367573 | 0.196 | 0.128 | 7.44E-15 | 2.5 | NUP58    | 1.53125     |
| ABCF1     | 3.32E-19 | 0.1225683 | 0.128 | 0.076 | 8.00E-15 | 2.5 | ABCF1    | 1.684210526 |
| SS18L11   | 3.39E-19 | 0.1131925 | 0.066 | 0.031 | 8.18E-15 | 2.5 | SS18L1   | 2.129032258 |
| SRGAP23   | 3.39E-19 | 0.1429465 | 0.208 | 0.139 | 8.18E-15 | 2.5 | SRGAP2   | 1.496402878 |
| BIRC62    | 3.39E-19 | 0.1443632 | 0.671 | 0.55  | 8.18E-15 | 2.5 | BIRC6    | 1.22        |
| TUBG21    | 3.45E-19 | 0.1187249 | 0.071 | 0.035 | 8.33E-15 | 2.5 | TUBG2    | 2.028571429 |
| EML21     | 3.49E-19 | 0.1351035 | 0.093 | 0.05  | 8.41E-15 | 2.5 | EML2     | 1.86        |
| TMEM1812  | 3.52E-19 | 0.1590602 | 0.311 | 0.227 | 8.49E-15 | 2.5 | TMEM181  | 1.370044053 |
| WSB21     | 3.60E-19 | 0.1319414 | 0.137 | 0.082 | 8.68E-15 | 2.5 | WSB2     | 1.670731707 |
| TSPAN91   | 3.64E-19 | 0.1071123 | 0.145 | 0.088 | 8.78E-15 | 2.5 | TSPAN9   | 1.647727273 |
| IL1R12    | 3.81E-19 | 0.106454  | 0.116 | 0.066 | 9.18E-15 | 2.5 | IL1R1    | 1.757575758 |
| PEX23     | 3.83E-19 | 0.1536401 | 0.157 | 0.099 | 9.23E-15 | 2.5 | PEX2     | 1.585858586 |
| ATP6V1E11 | 3.91E-19 | 0.1482472 | 0.378 | 0.282 | 9.42E-15 | 2.5 | ATP6V1E1 | 1.340425532 |
| TMEM62    | 3.91E-19 | 0.1111555 | 0.08  | 0.041 | 9.43E-15 | 2.5 | TMEM62   | 1.951219512 |
| VPS411    | 3.95E-19 | 0.1507658 | 0.147 | 0.091 | 9.53E-15 | 2.5 | VPS41    | 1.615384615 |
| MIPEP3    | 4.62E-19 | 0.1184241 | 0.095 | 0.052 | 1.11E-14 | 2.5 | MIPEP    | 1.826923077 |
| MLLT62    | 4.70E-19 | 0.1306689 | 0.139 | 0.084 | 1.13E-14 | 2.5 | MLLT6    | 1.654761905 |
| ZNRF22    | 4.71E-19 | 0.1190436 | 0.346 | 0.252 | 1.13E-14 | 2.5 | ZNRF2    | 1.373015873 |
| POLB      | 4.71E-19 | 0.1484354 | 0.128 | 0.076 | 1.14E-14 | 2.5 | POLB     | 1.684210526 |
| FOCAD2    | 4.81E-19 | 0.1718173 | 0.226 | 0.156 | 1.16E-14 | 2.5 | FOCAD    | 1.448717949 |
| S100A163  | 4.92E-19 | 0.172285  | 0.218 | 0.147 | 1.19E-14 | 2.5 | S100A16  | 1.482993197 |
| ACBD51    | 5.26E-19 | 0.1011825 | 0.06  | 0.028 | 1.27E-14 | 2.5 | ACBD5    | 2.142857143 |
| IRS14     | 5.28E-19 | 0.1274877 | 0.146 | 0.089 | 1.27E-14 | 2.5 | IRS1     | 1.640449438 |
| NIF3L12   | 5.28E-19 | 0.1151048 | 0.096 | 0.052 | 1.27E-14 | 2.5 | NIF3L1   | 1.846153846 |
| VTA11     | 5.38E-19 | 0.1561736 | 0.16  | 0.101 | 1.30E-14 | 2.5 | VTA1     | 1.584158416 |
| ELMOD32   | 5.43E-19 | 0.1515693 | 0.134 | 0.082 | 1.31E-14 | 2.5 | ELMOD3   | 1.634146341 |
| SUMF22    | 5.72E-19 | 0.1429005 | 0.142 | 0.087 | 1.38E-14 | 2.5 | SUMF2    | 1.632183908 |
| ID22      | 5.80E-19 | 0.1096707 | 0.158 | 0.099 | 1.40E-14 | 2.5 | ID2      | 1.595959596 |
| NFX12     | 6.39E-19 | 0.1615723 | 0.211 | 0.144 | 1.54E-14 | 2.5 | NFX1     | 1.465277778 |
| PTPRT1    | 6.43E-19 | 0.1390635 | 0.089 | 0.047 | 1.55E-14 | 2.5 | PTPRT    | 1.893617021 |
| MAPK104   | 6.64E-19 | 0.1212938 | 0.08  | 0.041 | 1.60E-14 | 2.5 | MAPK10   | 1.951219512 |
| RABL3     | 6.91E-19 | 0.1075948 | 0.089 | 0.047 | 1.67E-14 | 2.5 | RABL3    | 1.893617021 |
| ZBTB443   | 7.16E-19 | 0.1357956 | 0.203 | 0.135 | 1.73E-14 | 2.5 | ZBTB44   | 1.503703704 |
| TTF21     | 7.25E-19 | 0.1113433 | 0.083 | 0.043 | 1.75E-14 | 2.5 | TTF2     | 1.930232558 |
| MYH143    | 7.26E-19 | 0.16562   | 0.221 | 0.153 | 1.75E-14 | 2.5 | MYH14    | 1.444444444 |
| ZC3H132   | 7.93E-19 | 0.14778   | 0.268 | 0.19  | 1.91E-14 | 2.5 | ZC3H13   | 1.410526316 |
| ZSCAN18   | 8.38E-19 | 0.1067008 | 0.069 | 0.034 | 2.02E-14 | 2.5 | ZSCAN18  | 2.029411765 |
| PDCD6IP1  | 8.69E-19 | 0.1333576 | 0.253 | 0.177 | 2.10E-14 | 2.5 | PDCD6IP  | 1.429378531 |
| AQR1      | 9.17E-19 | 0.1485113 | 0.153 | 0.096 | 2.21E-14 | 2.5 | AQR      | 1.59375     |
| FBXO361   | 9.35E-19 | 0.1165877 | 0.092 | 0.049 | 2.25E-14 | 2.5 | FBXO36   | 1.87755102  |
| SHISA62   | 9.49E-19 | 0.1019993 | 0.048 | 0.02  | 2.29E-14 | 2.5 | SHISA6   | 2.4         |
| HDGF3     | 9.84E-19 | 0.1872036 | 0.341 | 0.257 | 2.37E-14 | 2.5 | HDGF     | 1.326848249 |
| KLF42     | 9.88E-19 | 0.1337542 | 0.166 | 0.105 | 2.38E-14 | 2.5 | KLF4     | 1.580952381 |
| ZBTB40    | 1.00E-18 | 0.1057772 | 0.05  | 0.021 | 2.42E-14 | 2.5 | ZBTB40   | 2.380952381 |
| DYNLRB13  | 1.07E-18 | 0.181954  | 0.394 | 0.302 | 2.57E-14 | 2.5 | DYNLRB1  | 1.304635762 |



|                 |          |           |       |       |          |     |           |             |
|-----------------|----------|-----------|-------|-------|----------|-----|-----------|-------------|
| RP11-1379J22.21 | 1.13E-18 | 0.1349471 | 0.107 | 0.06  | 2.73E-14 | 2.5 | RP11-1379 | 1.783333333 |
| CUL11           | 1.15E-18 | 0.1549009 | 0.178 | 0.116 | 2.78E-14 | 2.5 | CUL1      | 1.534482759 |
| FAM155A3        | 1.16E-18 | 0.1556815 | 0.097 | 0.054 | 2.79E-14 | 2.5 | FAM155A   | 1.796296296 |
| COMMD13         | 1.24E-18 | 0.1746196 | 0.132 | 0.08  | 3.00E-14 | 2.5 | COMMD1    | 1.65        |
| HNRNPUL1        | 1.37E-18 | 0.140262  | 0.175 | 0.114 | 3.31E-14 | 2.5 | HNRNPUL1  | 1.535087719 |
| SNRNP352        | 1.44E-18 | 0.1368317 | 0.119 | 0.07  | 3.48E-14 | 2.5 | SNRNP35   | 1.7         |
| CCDC733         | 1.45E-18 | 0.1459909 | 0.16  | 0.1   | 3.51E-14 | 2.5 | CCDC73    | 1.6         |
| DUSP3           | 1.47E-18 | 0.1301201 | 0.115 | 0.067 | 3.54E-14 | 2.5 | DUSP3     | 1.71641791  |
| P2RX41          | 1.56E-18 | 0.1315686 | 0.124 | 0.074 | 3.77E-14 | 2.5 | P2RX4     | 1.675675676 |
| HN1L1           | 1.63E-18 | 0.1294281 | 0.122 | 0.072 | 3.92E-14 | 2.5 | HN1L      | 1.694444444 |
| PIAS12          | 1.69E-18 | 0.1172515 | 0.583 | 0.472 | 4.06E-14 | 2.5 | PIAS1     | 1.235169492 |
| MKNK11          | 1.72E-18 | 0.1366033 | 0.111 | 0.064 | 4.16E-14 | 2.5 | MKNK1     | 1.734375    |
| EP4002          | 1.83E-18 | 0.1405409 | 0.144 | 0.089 | 4.42E-14 | 2.5 | EP400     | 1.617977528 |
| ZNF4802         | 1.93E-18 | 0.1056775 | 0.09  | 0.049 | 4.66E-14 | 2.5 | ZNF480    | 1.836734694 |
| NEK61           | 2.11E-18 | 0.1076843 | 0.066 | 0.032 | 5.10E-14 | 2.5 | NEK6      | 2.0625      |
| ITGA103         | 2.29E-18 | 0.1339511 | 0.091 | 0.049 | 5.51E-14 | 2.5 | ITGA10    | 1.857142857 |
| ARHGEF263       | 2.29E-18 | 0.1023442 | 0.156 | 0.098 | 5.53E-14 | 2.5 | ARHGEF26  | 1.591836735 |
| CWF19L22        | 2.57E-18 | 0.148398  | 0.208 | 0.141 | 6.19E-14 | 2.5 | CWF19L2   | 1.475177305 |
| STXBP31         | 2.67E-18 | 0.1297505 | 0.16  | 0.102 | 6.43E-14 | 2.5 | STXBP3    | 1.568627451 |
| CMSS11          | 2.74E-18 | 0.1283519 | 0.168 | 0.108 | 6.60E-14 | 2.5 | CMSS1     | 1.555555556 |
| CNDP23          | 2.79E-18 | 0.1187258 | 0.181 | 0.118 | 6.72E-14 | 2.5 | CNDP2     | 1.533898305 |
| UPF22           | 2.93E-18 | 0.1646332 | 0.374 | 0.282 | 7.07E-14 | 2.5 | UPF2      | 1.326241135 |
| MED23           | 2.94E-18 | 0.1387145 | 0.136 | 0.084 | 7.10E-14 | 2.5 | MED23     | 1.619047619 |
| DOCK53          | 2.97E-18 | 0.1300616 | 0.278 | 0.199 | 7.16E-14 | 2.5 | DOCK5     | 1.396984925 |
| BCLAF1          | 3.00E-18 | 0.157537  | 0.467 | 0.367 | 7.24E-14 | 2.5 | BCLAF1    | 1.272479564 |
| SLC19A22        | 3.40E-18 | 0.1619647 | 0.174 | 0.114 | 8.20E-14 | 2.5 | SLC19A2   | 1.526315789 |
| GPR1604         | 3.48E-18 | 0.132985  | 0.144 | 0.089 | 8.39E-14 | 2.5 | GPR160    | 1.617977528 |
| TMEM38B1        | 3.60E-18 | 0.1151554 | 0.082 | 0.043 | 8.68E-14 | 2.5 | TMEM38B   | 1.906976744 |
| TRIP122         | 3.97E-18 | 0.1467746 | 0.413 | 0.317 | 9.56E-14 | 2.5 | TRIP12    | 1.302839117 |
| MTMR91          | 4.11E-18 | 0.1219021 | 0.079 | 0.041 | 9.92E-14 | 2.5 | MTMR9     | 1.926829268 |
| RBM412          | 4.19E-18 | 0.1337136 | 0.115 | 0.068 | 1.01E-13 | 2.5 | RBM41     | 1.691176471 |
| OSTF11          | 4.87E-18 | 0.1044753 | 0.078 | 0.04  | 1.18E-13 | 2.5 | OSTF1     | 1.95        |
| RIPK11          | 5.06E-18 | 0.1038745 | 0.095 | 0.053 | 1.22E-13 | 2.5 | RIPK1     | 1.79245283  |
| CLK41           | 5.09E-18 | 0.1315015 | 0.113 | 0.066 | 1.23E-13 | 2.5 | CLK4      | 1.712121212 |
| DDX172          | 5.29E-18 | 0.1708541 | 0.512 | 0.415 | 1.28E-13 | 2.5 | DDX17     | 1.23373494  |
| SELT3           | 5.33E-18 | 0.1116233 | 0.121 | 0.072 | 1.29E-13 | 2.5 | SELT      | 1.680555556 |
| INTU1           | 5.72E-18 | 0.107247  | 0.09  | 0.048 | 1.38E-13 | 2.5 | INTU      | 1.875       |
| STK38L2         | 6.11E-18 | 0.1184534 | 0.264 | 0.186 | 1.47E-13 | 2.5 | STK38L    | 1.419354839 |
| GON4L1          | 6.21E-18 | 0.1533534 | 0.211 | 0.145 | 1.50E-13 | 2.5 | GON4L     | 1.455172414 |
| DDX101          | 6.28E-18 | 0.1390414 | 0.128 | 0.078 | 1.51E-13 | 2.5 | DDX10     | 1.641025641 |
| HERPUD21        | 6.38E-18 | 0.116281  | 0.106 | 0.061 | 1.54E-13 | 2.5 | HERPUD2   | 1.737704918 |
| RAB7A3          | 6.80E-18 | 0.1116513 | 0.548 | 0.439 | 1.64E-13 | 2.5 | RAB7A     | 1.248291572 |
| RSPH31          | 6.82E-18 | 0.1379229 | 0.119 | 0.071 | 1.64E-13 | 2.5 | RSPH3     | 1.676056338 |
| TSG1012         | 7.00E-18 | 0.155162  | 0.234 | 0.164 | 1.69E-13 | 2.5 | TSG101    | 1.426829268 |
| STAT62          | 7.09E-18 | 0.1051443 | 0.129 | 0.079 | 1.71E-13 | 2.5 | STAT6     | 1.632911392 |
| RUFY12          | 7.38E-18 | 0.1357024 | 0.155 | 0.099 | 1.78E-13 | 2.5 | RUFY1     | 1.565656566 |
| TXNDC162        | 8.57E-18 | 0.1212687 | 0.094 | 0.052 | 2.07E-13 | 2.5 | TXNDC16   | 1.807692308 |
| SENP61          | 9.53E-18 | 0.1398379 | 0.392 | 0.3   | 2.30E-13 | 2.5 | SENP6     | 1.306666667 |
| ERC21           | 9.59E-18 | 0.1443736 | 0.158 | 0.101 | 2.31E-13 | 2.5 | ERC2      | 1.564356436 |
| RAB282          | 9.73E-18 | 0.1188548 | 0.094 | 0.052 | 2.35E-13 | 2.5 | RAB28     | 1.807692308 |
| ATL11           | 9.84E-18 | 0.1120235 | 0.098 | 0.055 | 2.37E-13 | 2.5 | ATL1      | 1.781818182 |
| C1orf43         | 1.04E-17 | 0.1507873 | 0.189 | 0.127 | 2.51E-13 | 2.5 | C1orf43   | 1.488188976 |

|                |          |           |       |       |          |     |           |             |
|----------------|----------|-----------|-------|-------|----------|-----|-----------|-------------|
| RP11-289H16.11 | 1.05E-17 | 0.1153118 | 0.101 | 0.057 | 2.54E-13 | 2.5 | RP11-289H | 1.771929825 |
| MAP3K21        | 1.06E-17 | 0.1689107 | 0.253 | 0.182 | 2.55E-13 | 2.5 | MAP3K2    | 1.39010989  |
| NDUFS11        | 1.07E-17 | 0.139175  | 0.207 | 0.141 | 2.57E-13 | 2.5 | NDUFS1    | 1.468085106 |
| NBPF111        | 1.09E-17 | 0.1360384 | 0.112 | 0.066 | 2.64E-13 | 2.5 | NBPF11    | 1.696969697 |
| RP11-665G4.13  | 1.22E-17 | 0.1024339 | 0.136 | 0.083 | 2.93E-13 | 2.5 | RP11-665G | 1.638554217 |
| SERPINB62      | 1.22E-17 | 0.1124929 | 0.093 | 0.051 | 2.94E-13 | 2.5 | SERPINB6  | 1.823529412 |
| MYEF22         | 1.31E-17 | 0.1424629 | 0.137 | 0.085 | 3.15E-13 | 2.5 | MYEF2     | 1.611764706 |
| POLR2A2        | 1.34E-17 | 0.1226641 | 0.229 | 0.159 | 3.23E-13 | 2.5 | POLR2A    | 1.440251572 |
| PRPF4B2        | 1.35E-17 | 0.1349232 | 0.249 | 0.176 | 3.26E-13 | 2.5 | PRPF4B    | 1.414772727 |
| YPEL53         | 1.35E-17 | 0.1525011 | 0.49  | 0.387 | 3.26E-13 | 2.5 | YPEL5     | 1.266149871 |
| IRAK41         | 1.38E-17 | 0.1129906 | 0.067 | 0.033 | 3.32E-13 | 2.5 | IRAK4     | 2.03030303  |
| MGA2           | 1.38E-17 | 0.1223694 | 0.107 | 0.062 | 3.33E-13 | 2.5 | MGA       | 1.725806452 |
| RPRD1B         | 1.49E-17 | 0.1039306 | 0.094 | 0.052 | 3.60E-13 | 2.5 | RPRD1B    | 1.807692308 |
| RNF1413        | 1.52E-17 | 0.1099095 | 0.099 | 0.055 | 3.66E-13 | 2.5 | RNF141    | 1.8         |
| SP33           | 1.72E-17 | 0.1215972 | 0.284 | 0.205 | 4.14E-13 | 2.5 | SP3       | 1.385365854 |
| TPP21          | 1.74E-17 | 0.119239  | 0.151 | 0.096 | 4.19E-13 | 2.5 | TPP2      | 1.572916667 |
| UBE4A1         | 1.84E-17 | 0.1513655 | 0.175 | 0.115 | 4.43E-13 | 2.5 | UBE4A     | 1.52173913  |
| FAM83F1        | 1.99E-17 | 0.1084088 | 0.072 | 0.036 | 4.81E-13 | 2.5 | FAM83F    | 2           |
| LMCD1-AS12     | 2.01E-17 | 0.1268813 | 0.08  | 0.042 | 4.85E-13 | 2.5 | LMCD1-AS: | 1.904761905 |
| KIAA05562      | 2.06E-17 | 0.1169533 | 0.154 | 0.099 | 4.98E-13 | 2.5 | KIAA0556  | 1.555555556 |
| ARL6IP54       | 2.07E-17 | 0.143946  | 0.585 | 0.475 | 5.00E-13 | 2.5 | ARL6IP5   | 1.231578947 |
| FAM21A1        | 2.09E-17 | 0.1012972 | 0.061 | 0.029 | 5.04E-13 | 2.5 | FAM21A    | 2.103448276 |
| PIAS32         | 2.24E-17 | 0.1060483 | 0.07  | 0.036 | 5.41E-13 | 2.5 | PIAS3     | 1.944444444 |
| DENND5B1       | 2.40E-17 | 0.1436581 | 0.143 | 0.09  | 5.79E-13 | 2.5 | DENND5B   | 1.588888889 |
| CLSTN12        | 2.41E-17 | 0.1317174 | 0.133 | 0.082 | 5.81E-13 | 2.5 | CLSTN1    | 1.62195122  |
| HTATIP22       | 2.58E-17 | 0.1260621 | 0.14  | 0.088 | 6.21E-13 | 2.5 | HTATIP2   | 1.590909091 |
| NVL2           | 2.62E-17 | 0.1152147 | 0.103 | 0.059 | 6.32E-13 | 2.5 | NVL       | 1.745762712 |
| MTERF11        | 2.80E-17 | 0.1292759 | 0.13  | 0.079 | 6.75E-13 | 2.5 | MTERF1    | 1.64556962  |
| GTF2IRD2B1     | 2.83E-17 | 0.1271223 | 0.124 | 0.075 | 6.81E-13 | 2.5 | GTF2IRD2B | 1.653333333 |
| TMEM2602       | 3.00E-17 | 0.1098572 | 0.101 | 0.058 | 7.24E-13 | 2.5 | TMEM260   | 1.74137931  |
| ATRN1          | 3.10E-17 | 0.1134518 | 0.124 | 0.075 | 7.48E-13 | 2.5 | ATRN      | 1.653333333 |
| LINC004753     | 3.23E-17 | 0.1350133 | 0.13  | 0.08  | 7.80E-13 | 2.5 | LINC00475 | 1.625       |
| AC037445.11    | 3.33E-17 | 0.1022928 | 0.092 | 0.051 | 8.02E-13 | 2.5 | AC037445. | 1.803921569 |
| DNAJC27        | 3.34E-17 | 0.1246859 | 0.071 | 0.036 | 8.06E-13 | 2.5 | DNAJC27   | 1.972222222 |
| MAPK63         | 3.37E-17 | 0.1334465 | 0.351 | 0.263 | 8.12E-13 | 2.5 | MAPK6     | 1.33460076  |
| SLC9A82        | 3.52E-17 | 0.1368479 | 0.132 | 0.082 | 8.48E-13 | 2.5 | SLC9A8    | 1.609756098 |
| STX172         | 3.54E-17 | 0.1499145 | 0.169 | 0.113 | 8.54E-13 | 2.5 | STX17     | 1.495575221 |
| PKN22          | 3.56E-17 | 0.137254  | 0.337 | 0.255 | 8.59E-13 | 2.5 | PKN2      | 1.321568627 |
| SMARCAD12      | 3.82E-17 | 0.1374989 | 0.098 | 0.056 | 9.21E-13 | 2.5 | SMARCAD1  | 1.75        |
| COQ10B         | 4.13E-17 | 0.1298847 | 0.188 | 0.125 | 9.95E-13 | 2.5 | COQ10B    | 1.504       |
| CDK193         | 4.15E-17 | 0.1414536 | 0.401 | 0.309 | 1.00E-12 | 2.5 | CDK19     | 1.297734628 |
| FDFT12         | 4.91E-17 | 0.1868205 | 0.393 | 0.304 | 1.18E-12 | 2.5 | FDFT1     | 1.292763158 |
| TAGLN22        | 4.91E-17 | 0.1575355 | 0.287 | 0.211 | 1.18E-12 | 2.5 | TAGLN2    | 1.360189573 |
| ROCK11         | 5.41E-17 | 0.1506663 | 0.305 | 0.226 | 1.31E-12 | 2.5 | ROCK1     | 1.349557522 |
| SH3BP43        | 5.43E-17 | 0.1316577 | 0.22  | 0.151 | 1.31E-12 | 2.5 | SH3BP4    | 1.456953642 |
| DNM22          | 6.11E-17 | 0.1289365 | 0.142 | 0.089 | 1.47E-12 | 2.5 | DNM2      | 1.595505618 |
| MTA32          | 6.32E-17 | 0.1520629 | 0.2   | 0.137 | 1.52E-12 | 2.5 | MTA3      | 1.459854015 |
| ACOT71         | 6.70E-17 | 0.1180952 | 0.047 | 0.02  | 1.61E-12 | 2.5 | ACOT7     | 2.35        |
| RHOC1          | 6.87E-17 | 0.1184777 | 0.106 | 0.061 | 1.66E-12 | 2.5 | RHOC      | 1.737704918 |
| RFWD32         | 7.00E-17 | 0.1180561 | 0.087 | 0.048 | 1.69E-12 | 2.5 | RFWD3     | 1.8125      |
| CLCN32         | 7.14E-17 | 0.1531663 | 0.226 | 0.16  | 1.72E-12 | 2.5 | CLCN3     | 1.4125      |
| LINC015721     | 7.16E-17 | 0.1114753 | 0.075 | 0.039 | 1.73E-12 | 2.5 | LINC01572 | 1.923076923 |

|                |          |           |       |       |          |     |           |             |
|----------------|----------|-----------|-------|-------|----------|-----|-----------|-------------|
| CNOT6L2        | 7.23E-17 | 0.1033133 | 0.162 | 0.105 | 1.74E-12 | 2.5 | CNOT6L    | 1.542857143 |
| RP11-368L12.12 | 7.41E-17 | 0.1546462 | 0.151 | 0.097 | 1.79E-12 | 2.5 | RP11-368L | 1.556701031 |
| LUZP12         | 7.46E-17 | 0.1253271 | 0.169 | 0.111 | 1.80E-12 | 2.5 | LUZP1     | 1.522522523 |
| OLMALINC1      | 7.65E-17 | 0.1078015 | 0.075 | 0.04  | 1.84E-12 | 2.5 | OLMALINC  | 1.875       |
| ZNF434         | 7.72E-17 | 0.1390345 | 0.186 | 0.126 | 1.86E-12 | 2.5 | ZNF43     | 1.476190476 |
| MDK2           | 7.79E-17 | 0.1076111 | 0.059 | 0.028 | 1.88E-12 | 2.5 | MDK       | 2.107142857 |
| ABAT2          | 8.00E-17 | 0.1157664 | 0.095 | 0.053 | 1.93E-12 | 2.5 | ABAT      | 1.79245283  |
| MZF1-AS11      | 8.10E-17 | 0.1062759 | 0.062 | 0.031 | 1.95E-12 | 2.5 | MZF1-AS1  | 2           |
| NRIP32         | 8.19E-17 | 0.1173324 | 0.076 | 0.04  | 1.97E-12 | 2.5 | NRIP3     | 1.9         |
| SAP1302        | 9.39E-17 | 0.131331  | 0.131 | 0.081 | 2.26E-12 | 2.5 | SAP130    | 1.617283951 |
| RAB132         | 9.58E-17 | 0.1303626 | 0.199 | 0.136 | 2.31E-12 | 2.5 | RAB13     | 1.463235294 |
| RABGAP1L3      | 9.61E-17 | 0.1135674 | 0.299 | 0.219 | 2.32E-12 | 2.5 | RABGAP1L  | 1.365296804 |
| MPV171         | 9.65E-17 | 0.1102255 | 0.082 | 0.044 | 2.33E-12 | 2.5 | MPV17     | 1.863636364 |
| ALOX15B3       | 1.01E-16 | 0.1210574 | 0.092 | 0.051 | 2.44E-12 | 2.5 | ALOX15B   | 1.803921569 |
| ZFX1           | 1.01E-16 | 0.1354137 | 0.168 | 0.112 | 2.44E-12 | 2.5 | ZFX       | 1.5         |
| PSMB32         | 1.04E-16 | 0.1023732 | 0.137 | 0.085 | 2.51E-12 | 2.5 | PSMB3     | 1.611764706 |
| GLG12          | 1.04E-16 | 0.1299153 | 0.256 | 0.184 | 2.51E-12 | 2.5 | GLG1      | 1.391304348 |
| ZNF5442        | 1.05E-16 | 0.1342081 | 0.129 | 0.08  | 2.52E-12 | 2.5 | ZNF544    | 1.6125      |
| ZDHHC31        | 1.07E-16 | 0.1091548 | 0.088 | 0.049 | 2.57E-12 | 2.5 | ZDHHC3    | 1.795918367 |
| NUCB23         | 1.10E-16 | 0.1138533 | 0.184 | 0.122 | 2.64E-12 | 2.5 | NUCB2     | 1.508196721 |
| JKAMP3         | 1.10E-16 | 0.1214975 | 0.134 | 0.083 | 2.65E-12 | 2.5 | JKAMP     | 1.614457831 |
| MYH101         | 1.10E-16 | 0.1148291 | 0.107 | 0.062 | 2.66E-12 | 2.5 | MYH10     | 1.725806452 |
| CAPN71         | 1.13E-16 | 0.1282621 | 0.199 | 0.137 | 2.72E-12 | 2.5 | CAPN7     | 1.452554745 |
| ZCCHC142       | 1.14E-16 | 0.1224324 | 0.109 | 0.064 | 2.75E-12 | 2.5 | ZCCHC14   | 1.703125    |
| MTMR123        | 1.16E-16 | 0.1238774 | 0.138 | 0.087 | 2.80E-12 | 2.5 | MTMR12    | 1.586206897 |
| GCC24          | 1.17E-16 | 0.1445853 | 0.384 | 0.296 | 2.82E-12 | 2.5 | GCC2      | 1.297297297 |
| ACTR101        | 1.18E-16 | 0.1370965 | 0.198 | 0.135 | 2.85E-12 | 2.5 | ACTR10    | 1.466666667 |
| SLF22          | 1.21E-16 | 0.1041358 | 0.072 | 0.037 | 2.92E-12 | 2.5 | SLF2      | 1.945945946 |
| PPP1R13B3      | 1.23E-16 | 0.1622464 | 0.253 | 0.184 | 2.97E-12 | 2.5 | PPP1R13B  | 1.375       |
| SLC25A461      | 1.33E-16 | 0.1036535 | 0.076 | 0.04  | 3.20E-12 | 2.5 | SLC25A46  | 1.9         |
| ZFH33          | 1.34E-16 | 0.1432473 | 0.169 | 0.113 | 3.23E-12 | 2.5 | ZFH3      | 1.495575221 |
| GLO13          | 1.35E-16 | 0.1047531 | 0.235 | 0.164 | 3.26E-12 | 2.5 | GLO1      | 1.432926829 |
| CBX32          | 1.37E-16 | 0.1727768 | 0.295 | 0.221 | 3.29E-12 | 2.5 | CBX3      | 1.334841629 |
| IKZF22         | 1.39E-16 | 0.1072295 | 0.073 | 0.038 | 3.35E-12 | 2.5 | IKZF2     | 1.921052632 |
| NCAPD21        | 1.45E-16 | 0.1126275 | 0.078 | 0.042 | 3.51E-12 | 2.5 | NCAPD2    | 1.857142857 |
| CTNNA11        | 1.46E-16 | 0.1120569 | 0.632 | 0.526 | 3.53E-12 | 2.5 | CTNNA1    | 1.201520913 |
| CASP21         | 1.52E-16 | 0.1300008 | 0.08  | 0.044 | 3.66E-12 | 2.5 | CASP2     | 1.818181818 |
| H1F02          | 1.60E-16 | 0.1718424 | 0.215 | 0.152 | 3.87E-12 | 2.5 | H1F0      | 1.414473684 |
| HSD17B43       | 1.62E-16 | 0.1215971 | 0.237 | 0.168 | 3.92E-12 | 2.5 | HSD17B4   | 1.410714286 |
| ASAP12         | 1.64E-16 | 0.1235755 | 0.373 | 0.283 | 3.96E-12 | 2.5 | ASAP1     | 1.318021201 |
| CTPS21         | 1.69E-16 | 0.1351187 | 0.11  | 0.066 | 4.08E-12 | 2.5 | CTPS2     | 1.666666667 |
| ALS21          | 1.71E-16 | 0.103668  | 0.066 | 0.033 | 4.13E-12 | 2.5 | ALS2      | 2           |
| NDUFB42        | 1.84E-16 | 0.1187386 | 0.526 | 0.423 | 4.43E-12 | 2.5 | NDUFB4    | 1.243498818 |
| CHST152        | 1.89E-16 | 0.1031039 | 0.069 | 0.036 | 4.56E-12 | 2.5 | CHST15    | 1.916666667 |
| RCOR31         | 1.93E-16 | 0.1278559 | 0.141 | 0.09  | 4.65E-12 | 2.5 | RCOR3     | 1.566666667 |
| SLC35D21       | 1.93E-16 | 0.1432924 | 0.122 | 0.075 | 4.65E-12 | 2.5 | SLC35D2   | 1.626666667 |
| C18orf323      | 2.08E-16 | 0.1228315 | 0.214 | 0.147 | 5.01E-12 | 2.5 | C18orf32  | 1.455782313 |
| HINT31         | 2.13E-16 | 0.1172919 | 0.103 | 0.06  | 5.15E-12 | 2.5 | HINT3     | 1.716666667 |
| RGL31          | 2.30E-16 | 0.1015744 | 0.06  | 0.03  | 5.54E-12 | 2.5 | RGL3      | 2           |
| NUP1332        | 2.32E-16 | 0.1028408 | 0.09  | 0.05  | 5.59E-12 | 2.5 | NUP133    | 1.8         |
| CCDC1742       | 2.65E-16 | 0.1484924 | 0.234 | 0.168 | 6.39E-12 | 2.5 | CCDC174   | 1.392857143 |
| ATP9A1         | 2.88E-16 | 0.1276859 | 0.155 | 0.101 | 6.94E-12 | 2.5 | ATP9A     | 1.534653465 |

|             |          |           |       |       |          |     |            |             |
|-------------|----------|-----------|-------|-------|----------|-----|------------|-------------|
| SELM1       | 2.99E-16 | 0.1700659 | 0.063 | 0.031 | 7.20E-12 | 2.5 | SELM       | 2.032258065 |
| ARFGEF11    | 3.00E-16 | 0.1622762 | 0.379 | 0.295 | 7.24E-12 | 2.5 | ARFGEF1    | 1.284745763 |
| PRR14L3     | 3.12E-16 | 0.1224976 | 0.142 | 0.091 | 7.52E-12 | 2.5 | PRR14L     | 1.56043956  |
| AP5M11      | 3.18E-16 | 0.1163268 | 0.112 | 0.068 | 7.67E-12 | 2.5 | AP5M1      | 1.647058824 |
| RNF1811     | 3.28E-16 | 0.1506373 | 0.469 | 0.376 | 7.91E-12 | 2.5 | RNF181     | 1.247340426 |
| NOL102      | 3.39E-16 | 0.1112333 | 0.164 | 0.108 | 8.16E-12 | 2.5 | NOL10      | 1.518518519 |
| TMEM1271    | 3.48E-16 | 0.1075206 | 0.088 | 0.049 | 8.40E-12 | 2.5 | TMEM127    | 1.795918367 |
| DENND4C1    | 3.56E-16 | 0.1745524 | 0.282 | 0.211 | 8.57E-12 | 2.5 | DENND4C    | 1.336492891 |
| REEP31      | 3.63E-16 | 0.1514347 | 0.341 | 0.261 | 8.75E-12 | 2.5 | REEP3      | 1.30651341  |
| KLHL23      | 3.65E-16 | 0.1270907 | 0.123 | 0.075 | 8.80E-12 | 2.5 | KLHL23     | 1.64        |
| ESCO12      | 3.66E-16 | 0.1355551 | 0.142 | 0.091 | 8.81E-12 | 2.5 | ESCO1      | 1.56043956  |
| LEPR1       | 3.74E-16 | 0.1141238 | 0.147 | 0.094 | 9.01E-12 | 2.5 | LEPR       | 1.563829787 |
| CHPT12      | 3.78E-16 | 0.129353  | 0.385 | 0.301 | 9.11E-12 | 2.5 | CHPT1      | 1.279069767 |
| TMOD33      | 3.95E-16 | 0.1127557 | 0.492 | 0.392 | 9.53E-12 | 2.5 | TMOD3      | 1.255102041 |
| PHF8        | 3.97E-16 | 0.1192757 | 0.128 | 0.08  | 9.56E-12 | 2.5 | PHF8       | 1.6         |
| SREBF23     | 4.17E-16 | 0.1387438 | 0.462 | 0.367 | 1.01E-11 | 2.5 | SREBF2     | 1.258855586 |
| PLD32       | 4.27E-16 | 0.1154467 | 0.081 | 0.045 | 1.03E-11 | 2.5 | PLD3       | 1.8         |
| AC018890.64 | 4.67E-16 | 0.1096859 | 0.312 | 0.23  | 1.13E-11 | 2.5 | AC018890.1 | 1.356521739 |
| ZHX22       | 4.86E-16 | 0.1146988 | 0.421 | 0.33  | 1.17E-11 | 2.5 | ZHX2       | 1.275757576 |
| RARB3       | 6.20E-16 | 0.1260879 | 0.107 | 0.064 | 1.49E-11 | 2.5 | RARB       | 1.671875    |
| ATAD21      | 6.44E-16 | 0.1268817 | 0.11  | 0.066 | 1.55E-11 | 2.5 | ATAD2      | 1.666666667 |
| SMAD23      | 6.65E-16 | 0.1329852 | 0.381 | 0.294 | 1.60E-11 | 2.5 | SMAD2      | 1.295918367 |
| ATRAID2     | 6.91E-16 | 0.1002627 | 0.082 | 0.045 | 1.67E-11 | 2.5 | ATRAID     | 1.822222222 |
| KDELR12     | 7.10E-16 | 0.1283016 | 0.158 | 0.104 | 1.71E-11 | 2.5 | KDELR1     | 1.519230769 |
| VAT12       | 7.59E-16 | 0.1428843 | 0.192 | 0.133 | 1.83E-11 | 2.5 | VAT1       | 1.443609023 |
| MYBL11      | 7.73E-16 | 0.1392903 | 0.113 | 0.068 | 1.86E-11 | 2.5 | MYBL1      | 1.661764706 |
| ZNF7141     | 7.88E-16 | 0.119232  | 0.073 | 0.039 | 1.90E-11 | 2.5 | ZNF714     | 1.871794872 |
| HTT2        | 7.92E-16 | 0.1078893 | 0.228 | 0.16  | 1.91E-11 | 2.5 | HTT        | 1.425       |
| MRPL421     | 8.72E-16 | 0.1442259 | 0.255 | 0.185 | 2.10E-11 | 2.5 | MRPL42     | 1.378378378 |
| CASC31      | 9.83E-16 | 0.1369623 | 0.207 | 0.145 | 2.37E-11 | 2.5 | CASC3      | 1.427586207 |
| IFNGR21     | 9.87E-16 | 0.1419531 | 0.377 | 0.293 | 2.38E-11 | 2.5 | IFNGR2     | 1.28668942  |
| TGFBR13     | 1.06E-15 | 0.1116621 | 0.164 | 0.109 | 2.55E-11 | 2.5 | TGFBR1     | 1.504587156 |
| CDS12       | 1.08E-15 | 0.1185926 | 0.178 | 0.12  | 2.60E-11 | 2.5 | CDS1       | 1.483333333 |
| ZNF241      | 1.08E-15 | 0.1528653 | 0.336 | 0.255 | 2.60E-11 | 2.5 | ZNF24      | 1.317647059 |
| SNRNP200    | 1.20E-15 | 0.1374    | 0.177 | 0.12  | 2.90E-11 | 2.5 | SNRNP200   | 1.475       |
| TYW11       | 1.22E-15 | 0.144736  | 0.134 | 0.085 | 2.95E-11 | 2.5 | TYW1       | 1.576470588 |
| R3HCC1L3    | 1.27E-15 | 0.1419049 | 0.181 | 0.124 | 3.06E-11 | 2.5 | R3HCC1L    | 1.459677419 |
| IFT742      | 1.36E-15 | 0.101917  | 0.077 | 0.042 | 3.27E-11 | 2.5 | IFT74      | 1.833333333 |
| GABARAP3    | 1.37E-15 | 0.1455953 | 0.442 | 0.352 | 3.30E-11 | 2.5 | GABARAP    | 1.255681818 |
| H2AFJ2      | 1.45E-15 | 0.2013477 | 0.068 | 0.036 | 3.49E-11 | 2.5 | H2AFJ      | 1.888888889 |
| DSTYK1      | 1.51E-15 | 0.1139585 | 0.097 | 0.057 | 3.64E-11 | 2.5 | DSTYK      | 1.701754386 |
| IRAK22      | 1.52E-15 | 0.1598825 | 0.178 | 0.122 | 3.67E-11 | 2.5 | IRAK2      | 1.459016393 |
| ZFPM21      | 1.59E-15 | 0.1168074 | 0.165 | 0.109 | 3.84E-11 | 2.5 | ZFPM2      | 1.513761468 |
| TNFRSF12A2  | 1.64E-15 | 0.1013506 | 0.11  | 0.066 | 3.94E-11 | 2.5 | TNFRSF12A  | 1.666666667 |
| MAK1        | 1.74E-15 | 0.1337974 | 0.134 | 0.086 | 4.20E-11 | 2.5 | MAK        | 1.558139535 |
| SRSF54      | 1.76E-15 | 0.110547  | 0.381 | 0.294 | 4.26E-11 | 2.5 | SRSF5      | 1.295918367 |
| MAPK91      | 1.79E-15 | 0.1178689 | 0.1   | 0.059 | 4.32E-11 | 2.5 | MAPK9      | 1.694915254 |
| NMRK12      | 1.80E-15 | 0.1094314 | 0.057 | 0.028 | 4.33E-11 | 2.5 | NMRK1      | 2.035714286 |
| MRPL501     | 1.84E-15 | 0.1194239 | 0.183 | 0.125 | 4.44E-11 | 2.5 | MRPL50     | 1.464       |
| CYB5R41     | 1.90E-15 | 0.1061915 | 0.097 | 0.057 | 4.57E-11 | 2.5 | CYB5R4     | 1.701754386 |
| SLC39A92    | 1.94E-15 | 0.1220768 | 0.143 | 0.092 | 4.68E-11 | 2.5 | SLC39A9    | 1.554347826 |
| MECP2       | 2.05E-15 | 0.1023436 | 0.123 | 0.076 | 4.95E-11 | 2.5 | MECP2      | 1.618421053 |

|               |          |           |       |       |          |     |           |             |
|---------------|----------|-----------|-------|-------|----------|-----|-----------|-------------|
| THOC22        | 2.10E-15 | 0.1446633 | 0.499 | 0.403 | 5.07E-11 | 2.5 | THOC2     | 1.2382134   |
| RP1-167A14.21 | 2.15E-15 | 0.1345225 | 0.085 | 0.048 | 5.19E-11 | 2.5 | RP1-167A1 | 1.770833333 |
| ATP5A12       | 2.19E-15 | 0.1223945 | 0.25  | 0.182 | 5.28E-11 | 2.5 | ATP5A1    | 1.373626374 |
| ELP4          | 2.41E-15 | 0.1078701 | 0.08  | 0.044 | 5.81E-11 | 2.5 | ELP4      | 1.818181818 |
| TAF81         | 2.48E-15 | 0.1254623 | 0.104 | 0.062 | 5.97E-11 | 2.5 | TAF8      | 1.677419355 |
| SREK11        | 2.53E-15 | 0.1144363 | 0.222 | 0.158 | 6.11E-11 | 2.5 | SREK1     | 1.405063291 |
| MXI12         | 2.62E-15 | 0.1476709 | 0.252 | 0.184 | 6.31E-11 | 2.5 | MXI1      | 1.369565217 |
| CAPNS11       | 2.66E-15 | 0.1523797 | 0.121 | 0.076 | 6.41E-11 | 2.5 | CAPNS1    | 1.592105263 |
| CDK5RAP12     | 2.78E-15 | 0.1006982 | 0.079 | 0.043 | 6.69E-11 | 2.5 | CDK5RAP1  | 1.837209302 |
| ANKRD13C2     | 2.99E-15 | 0.13345   | 0.16  | 0.107 | 7.20E-11 | 2.5 | ANKRD13C  | 1.495327103 |
| SMC62         | 3.04E-15 | 0.1143013 | 0.113 | 0.069 | 7.32E-11 | 2.5 | SMC6      | 1.637681159 |
| NR2C22        | 3.05E-15 | 0.1260347 | 0.24  | 0.173 | 7.35E-11 | 2.5 | NR2C2     | 1.387283237 |
| TSC21         | 3.16E-15 | 0.1083454 | 0.056 | 0.028 | 7.62E-11 | 2.5 | TSC2      | 2           |
| ARID1A1       | 3.47E-15 | 0.1369543 | 0.307 | 0.232 | 8.36E-11 | 2.5 | ARID1A    | 1.323275862 |
| CUL53         | 3.49E-15 | 0.1295551 | 0.167 | 0.114 | 8.42E-11 | 2.5 | CUL5      | 1.464912281 |
| OPA12         | 3.65E-15 | 0.1231624 | 0.151 | 0.099 | 8.80E-11 | 2.5 | OPA1      | 1.525252525 |
| COA12         | 3.81E-15 | 0.1583759 | 0.279 | 0.209 | 9.18E-11 | 2.5 | COA1      | 1.33492823  |
| CASP8AP22     | 3.84E-15 | 0.101593  | 0.081 | 0.045 | 9.25E-11 | 2.5 | CASP8AP2  | 1.8         |
| CENPC1        | 3.93E-15 | 0.1030301 | 0.106 | 0.064 | 9.48E-11 | 2.5 | CENPC     | 1.65625     |
| TAF111        | 3.95E-15 | 0.1207184 | 0.093 | 0.054 | 9.53E-11 | 2.5 | TAF11     | 1.722222222 |
| MIDN1         | 4.11E-15 | 0.1074375 | 0.101 | 0.06  | 9.92E-11 | 2.5 | MIDN      | 1.683333333 |
| EPRS2         | 4.48E-15 | 0.1417452 | 0.192 | 0.134 | 1.08E-10 | 2.5 | EPRS      | 1.432835821 |
| ILKAP1        | 4.74E-15 | 0.1367821 | 0.105 | 0.063 | 1.14E-10 | 2.5 | ILKAP     | 1.666666667 |
| MRFAP13       | 4.80E-15 | 0.104664  | 0.236 | 0.169 | 1.16E-10 | 2.5 | MRFAP1    | 1.396449704 |
| EXOC12        | 4.90E-15 | 0.119169  | 0.157 | 0.104 | 1.18E-10 | 2.5 | EXOC1     | 1.509615385 |
| LSM14A2       | 5.13E-15 | 0.1513579 | 0.428 | 0.341 | 1.24E-10 | 2.5 | LSM14A    | 1.255131965 |
| WIPF23        | 5.21E-15 | 0.1143401 | 0.209 | 0.146 | 1.26E-10 | 2.5 | WIPF2     | 1.431506849 |
| VDR2          | 5.83E-15 | 0.1216563 | 0.122 | 0.077 | 1.40E-10 | 2.5 | VDR       | 1.584415584 |
| MRFAP1L12     | 6.19E-15 | 0.1001421 | 0.082 | 0.046 | 1.49E-10 | 2.5 | MRFAP1L1  | 1.782608696 |
| ASNS3         | 6.37E-15 | 0.1082991 | 0.128 | 0.081 | 1.54E-10 | 2.5 | ASNS      | 1.580246914 |
| SPG201        | 6.51E-15 | 0.1112983 | 0.179 | 0.123 | 1.57E-10 | 2.5 | SPG20     | 1.455284553 |
| TSPAN134      | 6.63E-15 | 0.1000924 | 0.161 | 0.107 | 1.60E-10 | 2.5 | TSPAN13   | 1.504672897 |
| RPRD1A        | 7.04E-15 | 0.1303511 | 0.177 | 0.122 | 1.70E-10 | 2.5 | RPRD1A    | 1.450819672 |
| XRN11         | 7.11E-15 | 0.1171833 | 0.386 | 0.301 | 1.71E-10 | 2.5 | XRN1      | 1.282392027 |
| GAREM11       | 8.00E-15 | 0.1342491 | 0.395 | 0.311 | 1.93E-10 | 2.5 | GAREM1    | 1.270096463 |
| HSPB112       | 8.23E-15 | 0.103554  | 0.147 | 0.096 | 1.98E-10 | 2.5 | HSPB11    | 1.53125     |
| TRAPPC102     | 8.34E-15 | 0.1162556 | 0.163 | 0.11  | 2.01E-10 | 2.5 | TRAPPC10  | 1.481818182 |
| PLAA2         | 8.43E-15 | 0.1027073 | 0.105 | 0.064 | 2.03E-10 | 2.5 | PLAA      | 1.640625    |
| ARHGAP52      | 8.44E-15 | 0.1206513 | 0.486 | 0.388 | 2.04E-10 | 2.5 | ARHGAP5   | 1.25257732  |
| LINC008622    | 9.91E-15 | 0.1005511 | 0.069 | 0.037 | 2.39E-10 | 2.5 | LINC00862 | 1.864864865 |
| ASH2L1        | 1.02E-14 | 0.1124013 | 0.099 | 0.059 | 2.46E-10 | 2.5 | ASH2L     | 1.677966102 |
| INPP4A1       | 1.04E-14 | 0.1009446 | 0.086 | 0.049 | 2.51E-10 | 2.5 | INPP4A    | 1.755102041 |
| FADS32        | 1.05E-14 | 0.1081184 | 0.167 | 0.111 | 2.54E-10 | 2.5 | FADS3     | 1.504504505 |
| DDX582        | 1.17E-14 | 0.1062585 | 0.139 | 0.09  | 2.82E-10 | 2.5 | DDX58     | 1.544444444 |
| C18orf251     | 1.21E-14 | 0.1127344 | 0.103 | 0.062 | 2.92E-10 | 2.5 | C18orf25  | 1.661290323 |
| FAM193A1      | 1.21E-14 | 0.1330671 | 0.236 | 0.172 | 2.92E-10 | 2.5 | FAM193A   | 1.372093023 |
| SYBU1         | 1.23E-14 | 0.1203302 | 0.123 | 0.078 | 2.96E-10 | 2.5 | SYBU      | 1.576923077 |
| ALPK12        | 1.25E-14 | 0.1048347 | 0.282 | 0.21  | 3.01E-10 | 2.5 | ALPK1     | 1.342857143 |
| SYNRG1        | 1.31E-14 | 0.1180737 | 0.101 | 0.061 | 3.17E-10 | 2.5 | SYNRG     | 1.655737705 |
| KLHL282       | 1.33E-14 | 0.1137577 | 0.152 | 0.101 | 3.21E-10 | 2.5 | KLHL28    | 1.504950495 |
| MED271        | 1.34E-14 | 0.1150455 | 0.092 | 0.054 | 3.22E-10 | 2.5 | MED27     | 1.703703704 |
| FAM174B2      | 1.42E-14 | 0.1206282 | 0.111 | 0.069 | 3.42E-10 | 2.5 | FAM174B   | 1.608695652 |

|              |          |           |       |       |          |     |           |             |
|--------------|----------|-----------|-------|-------|----------|-----|-----------|-------------|
| ATF7IP3      | 1.43E-14 | 0.123515  | 0.232 | 0.168 | 3.44E-10 | 2.5 | ATF7IP    | 1.380952381 |
| TMED31       | 1.45E-14 | 0.1136476 | 0.121 | 0.076 | 3.50E-10 | 2.5 | TMED3     | 1.592105263 |
| SH3BGRL32    | 1.47E-14 | 0.1367042 | 0.09  | 0.052 | 3.54E-10 | 2.5 | SH3BGRL3  | 1.730769231 |
| TCAIM2       | 1.48E-14 | 0.108358  | 0.096 | 0.057 | 3.57E-10 | 2.5 | TCAIM     | 1.684210526 |
| KIF26B2      | 1.49E-14 | 0.1185929 | 0.055 | 0.027 | 3.58E-10 | 2.5 | KIF26B    | 2.037037037 |
| CUL4A2       | 1.61E-14 | 0.1206098 | 0.239 | 0.173 | 3.89E-10 | 2.5 | CUL4A     | 1.38150289  |
| LUC7L5       | 1.67E-14 | 0.1284282 | 0.137 | 0.09  | 4.03E-10 | 2.5 | LUC7L     | 1.522222222 |
| SMARCA23     | 1.70E-14 | 0.1086256 | 0.388 | 0.301 | 4.11E-10 | 2.5 | SMARCA2   | 1.289036545 |
| ATXN22       | 1.73E-14 | 0.1122856 | 0.415 | 0.325 | 4.18E-10 | 2.5 | ATXN2     | 1.276923077 |
| KAT6A1       | 1.77E-14 | 0.1052662 | 0.32  | 0.244 | 4.26E-10 | 2.5 | KAT6A     | 1.31147541  |
| C2orf683     | 1.78E-14 | 0.1030477 | 0.097 | 0.058 | 4.30E-10 | 2.5 | C2orf68   | 1.672413793 |
| IMMT1        | 1.89E-14 | 0.1153608 | 0.119 | 0.075 | 4.55E-10 | 2.5 | IMMT      | 1.586666667 |
| KIAA04303    | 1.89E-14 | 0.1055418 | 0.181 | 0.124 | 4.56E-10 | 2.5 | KIAA0430  | 1.459677419 |
| KMT5B3       | 1.99E-14 | 0.1257242 | 0.216 | 0.155 | 4.79E-10 | 2.5 | KMT5B     | 1.393548387 |
| CBWD52       | 2.03E-14 | 0.1173077 | 0.235 | 0.17  | 4.89E-10 | 2.5 | CBWD5     | 1.382352941 |
| MED42        | 2.09E-14 | 0.1143663 | 0.21  | 0.149 | 5.05E-10 | 2.5 | MED4      | 1.409395973 |
| R3HDM22      | 2.26E-14 | 0.1323659 | 0.164 | 0.112 | 5.46E-10 | 2.5 | R3HDM2    | 1.464285714 |
| USP3-AS11    | 2.35E-14 | 0.1166566 | 0.112 | 0.069 | 5.67E-10 | 2.5 | USP3-AS1  | 1.623188406 |
| C4orf47      | 2.35E-14 | 0.1013672 | 0.084 | 0.049 | 5.67E-10 | 2.5 | C4orf47   | 1.714285714 |
| PDK44        | 2.44E-14 | 0.1040118 | 0.12  | 0.075 | 5.89E-10 | 2.5 | PDK4      | 1.6         |
| SUGP21       | 2.46E-14 | 0.1036995 | 0.091 | 0.053 | 5.92E-10 | 2.5 | SUGP2     | 1.716981132 |
| VPRBP1       | 2.52E-14 | 0.1053427 | 0.086 | 0.05  | 6.07E-10 | 2.5 | VPRBP     | 1.72        |
| ERP293       | 2.60E-14 | 0.1183054 | 0.172 | 0.117 | 6.28E-10 | 2.5 | ERP29     | 1.47008547  |
| FAF22        | 2.74E-14 | 0.1531107 | 0.213 | 0.154 | 6.60E-10 | 2.5 | FAF2      | 1.383116883 |
| WARS21       | 2.83E-14 | 0.1054001 | 0.103 | 0.062 | 6.84E-10 | 2.5 | WARS2     | 1.661290323 |
| SS182        | 3.26E-14 | 0.1335    | 0.187 | 0.131 | 7.86E-10 | 2.5 | SS18      | 1.427480916 |
| ZNF447       | 3.36E-14 | 0.1056354 | 0.1   | 0.061 | 8.11E-10 | 2.5 | ZNF44     | 1.639344262 |
| TET31        | 3.38E-14 | 0.1175877 | 0.178 | 0.123 | 8.16E-10 | 2.5 | TET3      | 1.447154472 |
| EAPP2        | 3.42E-14 | 0.1382764 | 0.345 | 0.27  | 8.25E-10 | 2.5 | EAPP      | 1.277777778 |
| SMARCA5      | 3.95E-14 | 0.1229549 | 0.166 | 0.114 | 9.52E-10 | 2.5 | SMARCA5   | 1.456140351 |
| NEK102       | 4.05E-14 | 0.1271804 | 0.205 | 0.145 | 9.76E-10 | 2.5 | NEK10     | 1.413793103 |
| RAD502       | 4.13E-14 | 0.1225867 | 0.125 | 0.081 | 9.97E-10 | 2.5 | RAD50     | 1.543209877 |
| SIAH11       | 4.21E-14 | 0.103754  | 0.162 | 0.11  | 1.01E-09 | 2.5 | SIAH1     | 1.472727273 |
| GTF2I1       | 4.83E-14 | 0.1009243 | 0.534 | 0.433 | 1.16E-09 | 2.5 | GTF2I     | 1.233256351 |
| CDC42SE12    | 5.71E-14 | 0.1284627 | 0.201 | 0.143 | 1.38E-09 | 2.5 | CDC42SE1  | 1.405594406 |
| CCDC1251     | 6.29E-14 | 0.1194838 | 0.1   | 0.061 | 1.52E-09 | 2.5 | CCDC125   | 1.639344262 |
| UBE2E12      | 6.37E-14 | 0.1077291 | 0.424 | 0.335 | 1.54E-09 | 2.5 | UBE2E1    | 1.265671642 |
| SQLE3        | 6.46E-14 | 0.1273319 | 0.129 | 0.084 | 1.56E-09 | 2.5 | SQLE      | 1.535714286 |
| PRPF81       | 6.72E-14 | 0.1130677 | 0.124 | 0.079 | 1.62E-09 | 2.5 | PRPF8     | 1.569620253 |
| CHURC1-FNTB1 | 6.73E-14 | 0.1027141 | 0.071 | 0.039 | 1.62E-09 | 2.5 | CHURC1-FN | 1.820512821 |
| TNKS3        | 6.89E-14 | 0.1205662 | 0.356 | 0.277 | 1.66E-09 | 2.5 | TNKS      | 1.285198556 |
| KIF3B1       | 8.08E-14 | 0.1076124 | 0.124 | 0.079 | 1.95E-09 | 2.5 | KIF3B     | 1.569620253 |
| C9orf32      | 8.18E-14 | 0.1045552 | 0.187 | 0.132 | 1.97E-09 | 2.5 | C9orf3    | 1.416666667 |
| ZNF7201      | 8.52E-14 | 0.1098601 | 0.125 | 0.081 | 2.05E-09 | 2.5 | ZNF720    | 1.543209877 |
| SPOP4        | 8.75E-14 | 0.1211874 | 0.124 | 0.08  | 2.11E-09 | 2.5 | SPOP      | 1.55        |
| MSRA2        | 8.85E-14 | 0.1043644 | 0.123 | 0.079 | 2.13E-09 | 2.5 | MSRA      | 1.556962025 |
| PLP23        | 9.55E-14 | 0.1078841 | 0.108 | 0.067 | 2.30E-09 | 2.5 | PLP2      | 1.611940299 |
| ZNF7362      | 1.05E-13 | 0.1133293 | 0.122 | 0.079 | 2.53E-09 | 2.5 | ZNF736    | 1.544303797 |
| ABI22        | 1.05E-13 | 0.1116363 | 0.246 | 0.181 | 2.54E-09 | 2.5 | ABI2      | 1.359116022 |
| POGZ2        | 1.10E-13 | 0.1402973 | 0.328 | 0.257 | 2.66E-09 | 2.5 | POGZ      | 1.276264591 |
| FAM219A2     | 1.15E-13 | 0.1087071 | 0.152 | 0.102 | 2.78E-09 | 2.5 | FAM219A   | 1.490196078 |
| KCTD73       | 1.16E-13 | 0.1211913 | 0.155 | 0.105 | 2.79E-09 | 2.5 | KCTD7     | 1.476190476 |

|             |          |           |       |       |          |     |           |             |
|-------------|----------|-----------|-------|-------|----------|-----|-----------|-------------|
| WHSC12      | 1.24E-13 | 0.1016784 | 0.236 | 0.172 | 2.98E-09 | 2.5 | WHSC1     | 1.372093023 |
| TRAPPC132   | 1.25E-13 | 0.105031  | 0.095 | 0.057 | 3.00E-09 | 2.5 | TRAPPC13  | 1.666666667 |
| UQCC12      | 1.53E-13 | 0.1137195 | 0.107 | 0.067 | 3.70E-09 | 2.5 | UQCC1     | 1.597014925 |
| CSNK1D1     | 1.58E-13 | 0.1077992 | 0.11  | 0.069 | 3.81E-09 | 2.5 | CSNK1D    | 1.594202899 |
| SHROOM21    | 1.58E-13 | 0.1050193 | 0.084 | 0.049 | 3.82E-09 | 2.5 | SHROOM2   | 1.714285714 |
| PSMB52      | 1.99E-13 | 0.133302  | 0.304 | 0.233 | 4.79E-09 | 2.5 | PSMB5     | 1.30472103  |
| EID12       | 2.01E-13 | 0.1011457 | 0.119 | 0.076 | 4.85E-09 | 2.5 | EID1      | 1.565789474 |
| SLC35F52    | 2.09E-13 | 0.1047629 | 0.164 | 0.113 | 5.03E-09 | 2.5 | SLC35F5   | 1.451327434 |
| VLDLR1      | 2.33E-13 | 0.108443  | 0.087 | 0.052 | 5.62E-09 | 2.5 | VLDLR     | 1.673076923 |
| ANXA73      | 2.37E-13 | 0.1419446 | 0.355 | 0.282 | 5.72E-09 | 2.5 | ANXA7     | 1.258865248 |
| CLK13       | 2.39E-13 | 0.1151248 | 0.493 | 0.407 | 5.77E-09 | 2.5 | CLK1      | 1.211302211 |
| EPC22       | 2.85E-13 | 0.1001325 | 0.107 | 0.067 | 6.88E-09 | 2.5 | EPC2      | 1.597014925 |
| AC058791.12 | 2.99E-13 | 0.1397852 | 0.311 | 0.241 | 7.21E-09 | 2.5 | AC058791. | 1.290456432 |
| XRCC51      | 2.99E-13 | 0.134893  | 0.425 | 0.346 | 7.21E-09 | 2.5 | XRCC5     | 1.228323699 |
| ARGLU12     | 3.00E-13 | 0.1187047 | 0.241 | 0.179 | 7.24E-09 | 2.5 | ARGLU1    | 1.346368715 |
| GRIP12      | 3.07E-13 | 0.1108658 | 0.246 | 0.182 | 7.41E-09 | 2.5 | GRIP1     | 1.351648352 |
| PAXBP11     | 3.10E-13 | 0.1104477 | 0.134 | 0.089 | 7.47E-09 | 2.5 | PAXBP1    | 1.505617978 |
| MROH11      | 3.17E-13 | 0.1037448 | 0.101 | 0.063 | 7.65E-09 | 2.5 | MROH1     | 1.603174603 |
| URI1        | 3.22E-13 | 0.1138626 | 0.203 | 0.145 | 7.75E-09 | 2.5 | URI1      | 1.4         |
| FBXO71      | 3.52E-13 | 0.1048187 | 0.195 | 0.139 | 8.49E-09 | 2.5 | FBXO7     | 1.402877698 |
| TBC1D142    | 4.28E-13 | 0.1032222 | 0.106 | 0.067 | 1.03E-08 | 2.5 | TBC1D14   | 1.582089552 |
| HMBOX12     | 4.91E-13 | 0.1115559 | 0.295 | 0.225 | 1.18E-08 | 2.5 | HMBOX1    | 1.311111111 |
| BLVRB2      | 5.30E-13 | 0.1193583 | 0.103 | 0.064 | 1.28E-08 | 2.5 | BLVRB     | 1.609375    |
| MITD12      | 5.62E-13 | 0.1191138 | 0.143 | 0.097 | 1.35E-08 | 2.5 | MITD1     | 1.474226804 |
| DECR13      | 5.67E-13 | 0.1221469 | 0.21  | 0.153 | 1.37E-08 | 2.5 | DECR1     | 1.37254902  |
| BAZ1B2      | 6.75E-13 | 0.1191149 | 0.225 | 0.166 | 1.63E-08 | 2.5 | BAZ1B     | 1.355421687 |
| TUBB3       | 6.85E-13 | 0.1697637 | 0.4   | 0.329 | 1.65E-08 | 2.5 | TUBB      | 1.215805471 |
| IST12       | 7.06E-13 | 0.1192953 | 0.4   | 0.321 | 1.70E-08 | 2.5 | IST1      | 1.246105919 |
| FBXO331     | 7.24E-13 | 0.1063884 | 0.141 | 0.094 | 1.75E-08 | 2.5 | FBXO33    | 1.5         |
| SOS13       | 7.51E-13 | 0.1059606 | 0.445 | 0.36  | 1.81E-08 | 2.5 | SOS1      | 1.236111111 |
| VPS363      | 7.63E-13 | 0.110292  | 0.145 | 0.098 | 1.84E-08 | 2.5 | VPS36     | 1.479591837 |
| DEAF11      | 7.68E-13 | 0.1075245 | 0.113 | 0.072 | 1.85E-08 | 2.5 | DEAF1     | 1.569444444 |
| TNPO33      | 9.23E-13 | 0.1111414 | 0.198 | 0.142 | 2.22E-08 | 2.5 | TNPO3     | 1.394366197 |
| IL4R2       | 9.25E-13 | 0.1024176 | 0.19  | 0.136 | 2.23E-08 | 2.5 | IL4R      | 1.397058824 |
| FIGN2       | 9.96E-13 | 0.1425999 | 0.143 | 0.098 | 2.40E-08 | 2.5 | FIGN      | 1.459183673 |
| DLG31       | 1.11E-12 | 0.1021561 | 0.114 | 0.073 | 2.67E-08 | 2.5 | DLG3      | 1.561643836 |
| PSMD52      | 1.11E-12 | 0.1315447 | 0.162 | 0.113 | 2.68E-08 | 2.5 | PSMD5     | 1.433628319 |
| GNPAT2      | 1.13E-12 | 0.1038455 | 0.094 | 0.058 | 2.73E-08 | 2.5 | GNPAT     | 1.620689655 |
| TMF1        | 1.27E-12 | 0.1030114 | 0.238 | 0.177 | 3.06E-08 | 2.5 | TMF1      | 1.344632768 |
| RPA12       | 1.33E-12 | 0.1015649 | 0.101 | 0.063 | 3.22E-08 | 2.5 | RPA1      | 1.603174603 |
| PARG2       | 1.38E-12 | 0.105386  | 0.123 | 0.081 | 3.34E-08 | 2.5 | PARG      | 1.518518519 |
| MRPL333     | 1.79E-12 | 0.1159271 | 0.498 | 0.412 | 4.30E-08 | 2.5 | MRPL33    | 1.208737864 |
| USP141      | 1.82E-12 | 0.110922  | 0.137 | 0.093 | 4.40E-08 | 2.5 | USP14     | 1.47311828  |
| NAPG3       | 1.87E-12 | 0.123734  | 0.232 | 0.174 | 4.51E-08 | 2.5 | NAPG      | 1.333333333 |
| PLEKHA53    | 1.89E-12 | 0.1169842 | 0.467 | 0.383 | 4.55E-08 | 2.5 | PLEKHA5   | 1.219321149 |
| C1D3        | 1.90E-12 | 0.1094128 | 0.196 | 0.142 | 4.59E-08 | 2.5 | C1D       | 1.38028169  |
| AAMDC2      | 2.18E-12 | 0.1027076 | 0.218 | 0.16  | 5.26E-08 | 2.5 | AAMDC     | 1.3625      |
| DCAF102     | 2.26E-12 | 0.1297365 | 0.24  | 0.18  | 5.44E-08 | 2.5 | DCAF10    | 1.333333333 |
| HSPA92      | 2.26E-12 | 0.1120297 | 0.275 | 0.209 | 5.44E-08 | 2.5 | HSPA9     | 1.315789474 |
| UFD1L1      | 2.29E-12 | 0.1107877 | 0.125 | 0.083 | 5.52E-08 | 2.5 | UFD1L     | 1.506024096 |
| SQRDL2      | 2.55E-12 | 0.1264426 | 0.24  | 0.181 | 6.14E-08 | 2.5 | SQRDL     | 1.325966851 |
| NCOA62      | 2.56E-12 | 0.1239347 | 0.222 | 0.164 | 6.17E-08 | 2.5 | NCOA6     | 1.353658537 |

|              |          |           |       |       |          |     |            |             |
|--------------|----------|-----------|-------|-------|----------|-----|------------|-------------|
| HEATR5B1     | 3.03E-12 | 0.1130451 | 0.169 | 0.119 | 7.31E-08 | 2.5 | HEATR5B    | 1.420168067 |
| RBM262       | 3.06E-12 | 0.1127291 | 0.247 | 0.187 | 7.39E-08 | 2.5 | RBM26      | 1.320855615 |
| NUDCD33      | 3.28E-12 | 0.1041075 | 0.148 | 0.102 | 7.91E-08 | 2.5 | NUDCD3     | 1.450980392 |
| PDS5A2       | 3.30E-12 | 0.1171134 | 0.434 | 0.353 | 7.97E-08 | 2.5 | PDS5A      | 1.229461756 |
| PIBF12       | 3.64E-12 | 0.111735  | 0.228 | 0.169 | 8.77E-08 | 2.5 | PIBF1      | 1.349112426 |
| SORL13       | 3.79E-12 | 0.1019046 | 0.1   | 0.063 | 9.13E-08 | 2.5 | SORL1      | 1.587301587 |
| PPP4R3A1     | 3.83E-12 | 0.1282273 | 0.236 | 0.178 | 9.23E-08 | 2.5 | PPP4R3A    | 1.325842697 |
| IQCJ-SCHIP12 | 4.15E-12 | 0.2639326 | 0.137 | 0.094 | 1.00E-07 | 2.5 | IQCJ-SCHIP | 1.457446809 |
| RPL7L13      | 4.21E-12 | 0.1089047 | 0.166 | 0.117 | 1.02E-07 | 2.5 | RPL7L1     | 1.418803419 |
| IFITM32      | 5.18E-12 | 0.1610704 | 0.232 | 0.178 | 1.25E-07 | 2.5 | IFITM3     | 1.303370787 |
| STAT21       | 5.41E-12 | 0.1091762 | 0.122 | 0.082 | 1.30E-07 | 2.5 | STAT2      | 1.487804878 |
| LARP72       | 5.58E-12 | 0.1107333 | 0.202 | 0.148 | 1.35E-07 | 2.5 | LARP7      | 1.364864865 |
| XPO42        | 5.98E-12 | 0.1208543 | 0.154 | 0.108 | 1.44E-07 | 2.5 | XPO4       | 1.425925926 |
| FAM168B1     | 6.12E-12 | 0.1131248 | 0.128 | 0.087 | 1.48E-07 | 2.5 | FAM168B    | 1.471264368 |
| BSDC11       | 6.22E-12 | 0.1196902 | 0.24  | 0.182 | 1.50E-07 | 2.5 | BSDC1      | 1.318681319 |
| RBM14-RBM41  | 6.35E-12 | 0.1050992 | 0.084 | 0.051 | 1.53E-07 | 2.5 | RBM14-RB   | 1.647058824 |
| OXR12        | 6.85E-12 | 0.1359305 | 0.243 | 0.185 | 1.65E-07 | 2.5 | OXR1       | 1.313513514 |
| TTF13        | 7.47E-12 | 0.103867  | 0.158 | 0.111 | 1.80E-07 | 2.5 | TTF1       | 1.423423423 |
| PPP4R3B1     | 7.70E-12 | 0.1094058 | 0.224 | 0.167 | 1.86E-07 | 2.5 | PPP4R3B    | 1.341317365 |
| CCDC533      | 9.91E-12 | 0.1017878 | 0.128 | 0.086 | 2.39E-07 | 2.5 | CCDC53     | 1.488372093 |
| FBXL53       | 1.19E-11 | 0.119619  | 0.175 | 0.126 | 2.88E-07 | 2.5 | FBXL5      | 1.388888889 |
| PSMA43       | 1.28E-11 | 0.1390656 | 0.509 | 0.43  | 3.08E-07 | 2.5 | PSMA4      | 1.18372093  |
| UBE2D33      | 1.38E-11 | 0.1046557 | 0.672 | 0.579 | 3.33E-07 | 2.5 | UBE2D3     | 1.160621762 |
| GCH11        | 1.53E-11 | 0.1225568 | 0.145 | 0.1   | 3.68E-07 | 2.5 | GCH1       | 1.45        |
| ATXN102      | 1.53E-11 | 0.1241594 | 0.192 | 0.141 | 3.70E-07 | 2.5 | ATXN10     | 1.361702128 |
| ZFP142       | 1.63E-11 | 0.1069101 | 0.095 | 0.061 | 3.93E-07 | 2.5 | ZFP14      | 1.557377049 |
| RSF12        | 1.67E-11 | 0.100136  | 0.448 | 0.365 | 4.04E-07 | 2.5 | RSF1       | 1.22739726  |
| CEP571       | 1.78E-11 | 0.1126992 | 0.135 | 0.093 | 4.29E-07 | 2.5 | CEP57      | 1.451612903 |
| MPZL32       | 1.86E-11 | 0.133944  | 0.378 | 0.307 | 4.48E-07 | 2.5 | MPZL3      | 1.231270358 |
| S100PBP2     | 1.98E-11 | 0.1022201 | 0.148 | 0.104 | 4.77E-07 | 2.5 | S100PBP    | 1.423076923 |
| C16orf621    | 2.04E-11 | 0.1028235 | 0.101 | 0.065 | 4.91E-07 | 2.5 | C16orf62   | 1.553846154 |
| MON21        | 2.17E-11 | 0.1153634 | 0.289 | 0.227 | 5.23E-07 | 2.5 | MON2       | 1.273127753 |
| ARHGAP442    | 2.36E-11 | 0.1259155 | 0.227 | 0.172 | 5.68E-07 | 2.5 | ARHGAP44   | 1.319767442 |
| MCC2         | 2.51E-11 | 0.1322588 | 0.143 | 0.1   | 6.05E-07 | 2.5 | MCC        | 1.43        |
| BCAP312      | 2.84E-11 | 0.1030307 | 0.133 | 0.091 | 6.85E-07 | 2.5 | BCAP31     | 1.461538462 |
| ENSA2        | 2.97E-11 | 0.1089964 | 0.439 | 0.359 | 7.17E-07 | 2.5 | ENSA       | 1.222841226 |
| DYNC1H12     | 3.12E-11 | 0.1031633 | 0.235 | 0.178 | 7.52E-07 | 2.5 | DYNC1H1    | 1.320224719 |
| STRAP1       | 3.13E-11 | 0.1027903 | 0.19  | 0.138 | 7.56E-07 | 2.5 | STRAP      | 1.376811594 |
| RAF11        | 3.79E-11 | 0.1143369 | 0.252 | 0.194 | 9.13E-07 | 2.5 | RAF1       | 1.298969072 |
| NDFIP11      | 4.05E-11 | 0.1181128 | 0.247 | 0.189 | 9.75E-07 | 2.5 | NDFIP1     | 1.306878307 |
| ORMDL23      | 4.08E-11 | 0.137618  | 0.207 | 0.155 | 9.84E-07 | 2.5 | ORMDL2     | 1.335483871 |
| CIR12        | 4.17E-11 | 0.1104579 | 0.315 | 0.249 | 1.01E-06 | 2.5 | CIR1       | 1.265060241 |
| ZNF7102      | 4.58E-11 | 0.1018226 | 0.127 | 0.086 | 1.10E-06 | 2.5 | ZNF710     | 1.476744186 |
| DCTN22       | 4.69E-11 | 0.1030409 | 0.173 | 0.125 | 1.13E-06 | 2.5 | DCTN2      | 1.384       |
| DPP82        | 5.03E-11 | 0.1149815 | 0.127 | 0.087 | 1.21E-06 | 2.5 | DPP8       | 1.459770115 |
| ATXN32       | 5.35E-11 | 0.1069048 | 0.187 | 0.138 | 1.29E-06 | 2.5 | ATXN3      | 1.355072464 |
| TASP12       | 5.71E-11 | 0.1031062 | 0.172 | 0.125 | 1.38E-06 | 2.5 | TASP1      | 1.376       |
| ABCA51       | 6.54E-11 | 0.120757  | 0.164 | 0.118 | 1.58E-06 | 2.5 | ABCA5      | 1.389830508 |
| CNTN42       | 6.64E-11 | 0.1863616 | 0.178 | 0.131 | 1.60E-06 | 2.5 | CNTN4      | 1.358778626 |
| CHKA2        | 6.95E-11 | 0.1048702 | 0.145 | 0.102 | 1.67E-06 | 2.5 | CHKA       | 1.421568627 |
| SESN22       | 7.80E-11 | 0.1004344 | 0.152 | 0.108 | 1.88E-06 | 2.5 | SESN2      | 1.407407407 |
| CCDC90B2     | 9.50E-11 | 0.1034123 | 0.121 | 0.083 | 2.29E-06 | 2.5 | CCDC90B    | 1.457831325 |



|           |           |           |       |       |             |     |          |             |
|-----------|-----------|-----------|-------|-------|-------------|-----|----------|-------------|
| PDE4D1    | 1.00E-10  | 0.1228906 | 0.14  | 0.099 | 2.42E-06    | 2.5 | PDE4D    | 1.414141414 |
| STK17B3   | 1.14E-10  | 0.1208352 | 0.206 | 0.154 | 2.74E-06    | 2.5 | STK17B   | 1.337662338 |
| RFX3-AS12 | 1.14E-10  | 0.1073249 | 0.09  | 0.058 | 2.76E-06    | 2.5 | RFX3-AS1 | 1.551724138 |
| METTL92   | 1.32E-10  | 0.1049167 | 0.142 | 0.1   | 3.18E-06    | 2.5 | METTL9   | 1.42        |
| SH3GLB1   | 1.58E-10  | 0.1080718 | 0.196 | 0.147 | 3.80E-06    | 2.5 | SH3GLB1  | 1.333333333 |
| SYNGR21   | 1.60E-10  | 0.100887  | 0.061 | 0.035 | 3.86E-06    | 2.5 | SYNGR2   | 1.742857143 |
| TRPM72    | 1.77E-10  | 0.1066257 | 0.273 | 0.212 | 4.26E-06    | 2.5 | TRPM7    | 1.287735849 |
| FBXO212   | 1.94E-10  | 0.1104919 | 0.144 | 0.103 | 4.67E-06    | 2.5 | FBXO21   | 1.398058252 |
| PIN44     | 2.18E-10  | 0.1008091 | 0.324 | 0.26  | 5.26E-06    | 2.5 | PIN4     | 1.246153846 |
| TP532     | 2.68E-10  | 0.114355  | 0.09  | 0.059 | 6.47E-06    | 2.5 | TP53     | 1.525423729 |
| GRAMD31   | 3.43E-10  | 0.1493714 | 0.406 | 0.34  | 8.28E-06    | 2.5 | GRAMD3   | 1.194117647 |
| IDH14     | 4.49E-10  | 0.1030537 | 0.113 | 0.078 | 1.08E-05    | 2.5 | IDH1     | 1.448717949 |
| VPS452    | 4.57E-10  | 0.1011767 | 0.109 | 0.074 | 1.10E-05    | 2.5 | VPS45    | 1.472972973 |
| YES1      | 4.61E-10  | 0.1077603 | 0.273 | 0.214 | 1.11E-05    | 2.5 | YES1     | 1.275700935 |
| RAB5B     | 5.05E-10  | 0.1080307 | 0.24  | 0.187 | 1.22E-05    | 2.5 | RAB5B    | 1.28342246  |
| ANXA42    | 5.16E-10  | 0.1012228 | 0.145 | 0.104 | 1.24E-05    | 2.5 | ANXA4    | 1.394230769 |
| PRKAG12   | 5.50E-10  | 0.1041767 | 0.181 | 0.135 | 1.33E-05    | 2.5 | PRKAG1   | 1.340740741 |
| CBR43     | 7.22E-10  | 0.1160218 | 0.285 | 0.228 | 1.74E-05    | 2.5 | CBR4     | 1.25        |
| WDFY11    | 9.38E-10  | 0.1032384 | 0.118 | 0.081 | 2.26E-05    | 2.5 | WDFY1    | 1.456790123 |
| ACLY2     | 1.04E-09  | 0.1089952 | 0.15  | 0.109 | 2.50E-05    | 2.5 | ACLY     | 1.376146789 |
| USP82     | 1.08E-09  | 0.1057114 | 0.22  | 0.169 | 2.61E-05    | 2.5 | USP8     | 1.301775148 |
| BCL31     | 1.17E-09  | 0.1094764 | 0.138 | 0.099 | 2.82E-05    | 2.5 | BCL3     | 1.393939394 |
| PRDX53    | 1.18E-09  | 0.1078084 | 0.092 | 0.061 | 2.84E-05    | 2.5 | PRDX5    | 1.508196721 |
| RBBP82    | 1.58E-09  | 0.114351  | 0.136 | 0.097 | 3.81E-05    | 2.5 | RBBP8    | 1.402061856 |
| MARK12    | 1.60E-09  | 0.1080087 | 0.092 | 0.061 | 3.87E-05    | 2.5 | MARK1    | 1.508196721 |
| MDM22     | 2.51E-09  | 0.106928  | 0.178 | 0.135 | 6.06E-05    | 2.5 | MDM2     | 1.318518519 |
| DTWD12    | 2.76E-09  | 0.1023547 | 0.09  | 0.06  | 6.67E-05    | 2.5 | DTWD1    | 1.5         |
| MT-ND12   | 2.95E-09  | 0.1254759 | 0.995 | 0.977 | 7.11E-05    | 2.5 | MT-ND1   | 1.018423746 |
| ARNTL22   | 3.16E-09  | 0.1005649 | 0.185 | 0.14  | 7.63E-05    | 2.5 | ARNTL2   | 1.321428571 |
| ICA12     | 3.96E-09  | 0.108219  | 0.321 | 0.263 | 9.54E-05    | 2.5 | ICA1     | 1.220532319 |
| EIF2S23   | 4.39E-09  | 0.1013249 | 0.309 | 0.254 | 0.000105754 | 2.5 | EIF2S2   | 1.216535433 |
| NUDC2     | 4.67E-09  | 0.1077947 | 0.118 | 0.083 | 0.000112541 | 2.5 | NUDC     | 1.421686747 |
| ARPC33    | 7.51E-09  | 0.1508435 | 0.713 | 0.655 | 0.000181096 | 2.5 | ARPC3    | 1.088549618 |
| PIGL3     | 8.24E-09  | 0.1029139 | 0.1   | 0.069 | 0.000198591 | 2.5 | PIGL     | 1.449275362 |
| ST6GAL13  | 1.74E-08  | 0.1176285 | 0.3   | 0.245 | 0.000420249 | 2.5 | ST6GAL1  | 1.224489796 |
| DNAJB111  | 1.83E-08  | 0.127238  | 0.224 | 0.18  | 0.000441154 | 2.5 | DNAJB11  | 1.244444444 |
| PPP4R11   | 1.95E-08  | 0.1093788 | 0.28  | 0.228 | 0.000471334 | 2.5 | PPP4R1   | 1.228070175 |
| ANAPC112  | 2.30E-08  | 0.1063309 | 0.056 | 0.034 | 0.000553741 | 2.5 | ANAPC11  | 1.647058824 |
| EBP3      | 2.50E-08  | 0.105939  | 0.15  | 0.112 | 0.000602861 | 2.5 | EBP      | 1.339285714 |
| POLR2L1   | 1.03E-07  | 0.109483  | 0.056 | 0.035 | 0.002478322 | 2.5 | POLR2L   | 1.6         |
| RFX72     | 3.39E-07  | 0.1026112 | 0.15  | 0.115 | 0.008179052 | 2.5 | RFX7     | 1.304347826 |
| IDI12     | 3.49E-07  | 0.1012792 | 0.264 | 0.216 | 0.008422281 | 2.5 | IDI1     | 1.222222222 |
| SH3PXD2B4 | 4.38E-07  | 0.1081003 | 0.154 | 0.119 | 0.01056008  | 2.5 | SH3PXD2B | 1.294117647 |
| PLAU2     | 3.22E-261 | 1.308846  | 0.396 | 0.076 | 7.77E-257   | 2.6 | PLAU     | 5.210526316 |
| CXCL15    | 2.47E-236 | 2.298766  | 0.669 | 0.252 | 5.96E-232   | 2.6 | CXCL1    | 2.654761905 |
| ST53      | 5.15E-185 | 1.399599  | 0.723 | 0.323 | 1.24E-180   | 2.6 | ST5      | 2.238390093 |
| TNFAIP22  | 2.54E-173 | 1.140457  | 0.63  | 0.252 | 6.12E-169   | 2.6 | TNFAIP2  | 2.5         |
| CXCL83    | 6.78E-165 | 1.795199  | 0.764 | 0.431 | 1.64E-160   | 2.6 | CXCL8    | 1.77262181  |
| ST3GAL42  | 1.43E-163 | 0.8069561 | 0.284 | 0.058 | 3.44E-159   | 2.6 | ST3GAL4  | 4.896551724 |
| PLPP32    | 2.51E-160 | 1.305688  | 0.592 | 0.236 | 6.04E-156   | 2.6 | PLPP3    | 2.508474576 |
| EFNA14    | 3.10E-160 | 1.312399  | 0.572 | 0.224 | 7.48E-156   | 2.6 | EFNA1    | 2.553571429 |
| NCEH14    | 3.07E-151 | 1.104449  | 0.778 | 0.397 | 7.40E-147   | 2.6 | NCEH1    | 1.959697733 |

|                |           |           |       |       |           |     |           |             |
|----------------|-----------|-----------|-------|-------|-----------|-----|-----------|-------------|
| PPP4R42        | 1.33E-150 | 1.050186  | 0.325 | 0.081 | 3.21E-146 | 2.6 | PPP4R4    | 4.012345679 |
| RAB11FIP14     | 4.77E-150 | 1.072728  | 0.982 | 0.723 | 1.15E-145 | 2.6 | RAB11FIP1 | 1.358229599 |
| ABTB23         | 1.55E-149 | 1.330014  | 0.568 | 0.232 | 3.74E-145 | 2.6 | ABTB2     | 2.448275862 |
| TRERF12        | 1.33E-142 | 0.9995201 | 0.451 | 0.148 | 3.20E-138 | 2.6 | TRERF1    | 3.047297297 |
| EREG5          | 5.21E-141 | 1.288767  | 0.594 | 0.246 | 1.26E-136 | 2.6 | EREG      | 2.414634146 |
| ATP1B12        | 3.15E-137 | 1.105463  | 0.963 | 0.753 | 7.58E-133 | 2.6 | ATP1B1    | 1.278884462 |
| ELOVL72        | 4.26E-137 | 1.172385  | 0.339 | 0.095 | 1.03E-132 | 2.6 | ELOVL7    | 3.568421053 |
| SAT12          | 2.30E-133 | 0.9544101 | 1     | 0.979 | 5.55E-129 | 2.6 | SAT1      | 1.02145046  |
| CXCL22         | 2.52E-131 | 1.413183  | 0.513 | 0.207 | 6.08E-127 | 2.6 | CXCL2     | 2.47826087  |
| KLHL133        | 3.76E-129 | 0.9273221 | 0.346 | 0.099 | 9.07E-125 | 2.6 | KLHL13    | 3.494949495 |
| IRAK23         | 2.50E-124 | 0.9126978 | 0.372 | 0.117 | 6.03E-120 | 2.6 | IRAK2     | 3.179487179 |
| ALCAM5         | 2.93E-122 | 0.8311393 | 0.876 | 0.496 | 7.08E-118 | 2.6 | ALCAM     | 1.766129032 |
| TNC5           | 4.55E-122 | 1.090961  | 0.655 | 0.318 | 1.10E-117 | 2.6 | TNC       | 2.059748428 |
| RP11-519G16.32 | 1.42E-119 | 1.054704  | 0.821 | 0.494 | 3.42E-115 | 2.6 | RP11-519G | 1.66194332  |
| LIMCH13        | 8.09E-116 | 0.9399839 | 0.805 | 0.473 | 1.95E-111 | 2.6 | LIMCH1    | 1.701902748 |
| CSGALNACT12    | 9.07E-116 | 0.9646894 | 0.46  | 0.173 | 2.19E-111 | 2.6 | CSGALNAC  | 2.658959538 |
| CXCL62         | 6.20E-114 | 1.481212  | 0.246 | 0.06  | 1.49E-109 | 2.6 | CXCL6     | 4.1         |
| PTPRE2         | 8.58E-114 | 0.8880764 | 0.572 | 0.251 | 2.07E-109 | 2.6 | PTPRE     | 2.278884462 |
| USP543         | 4.74E-109 | 1.204501  | 0.788 | 0.483 | 1.14E-104 | 2.6 | USP54     | 1.631469979 |
| TBL1XR13       | 1.34E-108 | 0.9077485 | 0.865 | 0.569 | 3.22E-104 | 2.6 | TBL1XR1   | 1.520210896 |
| CDK133         | 1.68E-107 | 0.9134213 | 0.732 | 0.41  | 4.04E-103 | 2.6 | CDK13     | 1.785365854 |
| DENND4A2       | 3.77E-105 | 0.9644898 | 0.854 | 0.583 | 9.10E-101 | 2.6 | DENND4A   | 1.46483705  |
| ENOX14         | 5.49E-104 | 0.775109  | 0.378 | 0.129 | 1.32E-99  | 2.6 | ENOX1     | 2.930232558 |
| DIO25          | 6.43E-102 | 0.6987131 | 0.52  | 0.211 | 1.55E-97  | 2.6 | DIO2      | 2.464454976 |
| TNFAIP33       | 1.91E-101 | 0.9972699 | 0.557 | 0.267 | 4.60E-97  | 2.6 | TNFAIP3   | 2.086142322 |
| BBC31          | 8.81E-100 | 0.6444015 | 0.265 | 0.074 | 2.12E-95  | 2.6 | BBC3      | 3.581081081 |
| ACADSB5        | 1.67E-99  | 0.7957388 | 0.475 | 0.191 | 4.03E-95  | 2.6 | ACADSB    | 2.486910995 |
| HIVEP23        | 1.77E-98  | 1.164538  | 0.713 | 0.438 | 4.26E-94  | 2.6 | HIVEP2    | 1.627853881 |
| PIP5K1B2       | 1.44E-97  | 0.8099777 | 0.34  | 0.116 | 3.46E-93  | 2.6 | PIP5K1B   | 2.931034483 |
| STAT5A5        | 5.96E-97  | 0.8347606 | 0.431 | 0.17  | 1.44E-92  | 2.6 | STAT5A    | 2.535294118 |
| SCGB2A23       | 6.58E-96  | 1.424819  | 0.54  | 0.262 | 1.59E-91  | 2.6 | SCGB2A2   | 2.061068702 |
| KLHL52         | 1.47E-95  | 0.8467055 | 0.566 | 0.273 | 3.54E-91  | 2.6 | KLHL5     | 2.073260073 |
| GCNT24         | 1.08E-94  | 0.7885927 | 0.753 | 0.431 | 2.60E-90  | 2.6 | GCNT2     | 1.747099768 |
| MYO1B3         | 1.52E-92  | 0.9052258 | 0.752 | 0.434 | 3.66E-88  | 2.6 | MYO1B     | 1.732718894 |
| CX3CL13        | 1.93E-89  | 0.7076136 | 0.495 | 0.219 | 4.66E-85  | 2.6 | CX3CL1    | 2.260273973 |
| FGF144         | 1.46E-88  | 1.003888  | 0.263 | 0.079 | 3.51E-84  | 2.6 | FGF14     | 3.329113924 |
| PLEKHF23       | 2.78E-88  | 0.6203097 | 0.292 | 0.093 | 6.71E-84  | 2.6 | PLEKHF2   | 3.139784946 |
| MGLL3          | 6.73E-88  | 0.6682217 | 0.427 | 0.173 | 1.62E-83  | 2.6 | MGLL      | 2.468208092 |
| SLC22A233      | 2.61E-87  | 0.7359518 | 0.519 | 0.236 | 6.29E-83  | 2.6 | SLC22A23  | 2.199152542 |
| CASC154        | 3.47E-86  | 0.7642741 | 0.828 | 0.509 | 8.36E-82  | 2.6 | CASC15    | 1.626719057 |
| RND13          | 5.36E-86  | 0.6890149 | 0.254 | 0.076 | 1.29E-81  | 2.6 | RND1      | 3.342105263 |
| SEMA3C4        | 7.55E-86  | 0.8095027 | 0.562 | 0.268 | 1.82E-81  | 2.6 | SEMA3C    | 2.097014925 |
| MTSS13         | 3.77E-85  | 0.7840587 | 0.379 | 0.145 | 9.10E-81  | 2.6 | MTSS1     | 2.613793103 |
| FOXP13         | 9.33E-82  | 0.7677145 | 0.887 | 0.623 | 2.25E-77  | 2.6 | FOXP1     | 1.423756019 |
| PIK3C2B2       | 2.01E-81  | 0.7086638 | 0.254 | 0.079 | 4.84E-77  | 2.6 | PIK3C2B   | 3.215189873 |
| PHLDB24        | 5.29E-81  | 0.7232725 | 0.703 | 0.407 | 1.28E-76  | 2.6 | PHLDB2    | 1.727272727 |
| TFPI5          | 1.68E-80  | 0.5664111 | 0.638 | 0.312 | 4.05E-76  | 2.6 | TFPI      | 2.044871795 |
| DRAM13         | 1.84E-80  | 0.7228338 | 0.569 | 0.284 | 4.43E-76  | 2.6 | DRAM1     | 2.003521127 |
| HPX5           | 4.27E-78  | 0.7056576 | 0.465 | 0.204 | 1.03E-73  | 2.6 | HPX       | 2.279411765 |
| CPE5           | 7.45E-78  | 0.6802779 | 0.449 | 0.194 | 1.80E-73  | 2.6 | CPE       | 2.31443299  |
| GADD45A4       | 1.85E-77  | 0.9318567 | 0.515 | 0.256 | 4.47E-73  | 2.6 | GADD45A   | 2.01171875  |
| BCAR33         | 3.24E-77  | 0.807451  | 0.538 | 0.268 | 7.81E-73  | 2.6 | BCAR3     | 2.007462687 |

|                |          |           |       |       |          |     |                       |             |
|----------------|----------|-----------|-------|-------|----------|-----|-----------------------|-------------|
| ECE13          | 2.68E-76 | 0.6721384 | 0.415 | 0.178 | 6.46E-72 | 2.6 | ECE1                  | 2.331460674 |
| BCL2L112       | 5.91E-74 | 0.7148119 | 0.316 | 0.119 | 1.42E-69 | 2.6 | BCL2L11               | 2.655462185 |
| IFNGR22        | 9.57E-74 | 0.6519862 | 0.562 | 0.291 | 2.31E-69 | 2.6 | IFNGR2                | 1.931271478 |
| RAB122         | 7.04E-72 | 0.7151163 | 0.506 | 0.251 | 1.70E-67 | 2.6 | RAB12                 | 2.015936255 |
| ANKS1B3        | 2.29E-71 | 0.678558  | 0.735 | 0.449 | 5.53E-67 | 2.6 | ANKS1B                | 1.636971047 |
| TNIP13         | 5.83E-71 | 0.7016808 | 0.437 | 0.202 | 1.41E-66 | 2.6 | TNIP1                 | 2.163366337 |
| TBX35          | 8.21E-71 | 0.6148347 | 0.533 | 0.259 | 1.98E-66 | 2.6 | TBX3                  | 2.057915058 |
| ITGB63         | 2.30E-69 | 0.753133  | 0.635 | 0.373 | 5.56E-65 | 2.6 | ITGB6                 | 1.702412869 |
| NFKBIA4        | 5.05E-69 | 0.6189083 | 0.85  | 0.618 | 1.22E-64 | 2.6 | NFKBIA                | 1.375404531 |
| PRSS233        | 2.91E-68 | 0.5346873 | 0.47  | 0.211 | 7.02E-64 | 2.6 | PRSS23                | 2.227488152 |
| C16orf453      | 5.44E-68 | 0.6436396 | 0.462 | 0.219 | 1.31E-63 | 2.6 | C16orf45              | 2.109589041 |
| BTG14          | 8.76E-68 | 0.6443365 | 0.826 | 0.57  | 2.11E-63 | 2.6 | BTG1                  | 1.449122807 |
| GRAMD32        | 4.43E-67 | 0.7732486 | 0.591 | 0.337 | 1.07E-62 | 2.6 | GRAMD3                | 1.753709199 |
| RAB313         | 6.21E-67 | 0.7505669 | 0.398 | 0.182 | 1.50E-62 | 2.6 | RAB31                 | 2.186813187 |
| ITGAV5         | 2.82E-66 | 0.5994121 | 0.672 | 0.388 | 6.80E-62 | 2.6 | ITGAV                 | 1.731958763 |
| TSPAN54        | 3.70E-66 | 0.684291  | 0.569 | 0.298 | 8.93E-62 | 2.6 | TSPAN5                | 1.909395973 |
| ICAM13         | 3.71E-65 | 0.6159699 | 0.392 | 0.175 | 8.96E-61 | 2.6 | ICAM1                 | 2.24        |
| AMOT2          | 5.85E-65 | 0.589768  | 0.23  | 0.077 | 1.41E-60 | 2.6 | AMOT                  | 2.987012987 |
| HIVEP34        | 3.88E-64 | 0.7123744 | 0.563 | 0.306 | 9.36E-60 | 2.6 | HIVEP3                | 1.839869281 |
| FHDC12         | 2.00E-63 | 0.5500417 | 0.296 | 0.114 | 4.83E-59 | 2.6 | FHDC1                 | 2.596491228 |
| PKP44          | 9.93E-63 | 0.6387482 | 0.749 | 0.492 | 2.40E-58 | 2.6 | PKP4                  | 1.522357724 |
| FGF134         | 1.94E-61 | 0.4789186 | 0.744 | 0.44  | 4.69E-57 | 2.6 | FGF13                 | 1.690909091 |
| MACC13         | 2.04E-61 | 0.7180081 | 0.665 | 0.402 | 4.93E-57 | 2.6 | MACC1                 | 1.654228856 |
| CXCL135        | 5.15E-61 | 0.3167545 | 0.687 | 0.4   | 1.24E-56 | 2.6 | CXCL13                | 1.7175      |
| RAP1B2         | 6.09E-61 | 0.6951002 | 0.714 | 0.464 | 1.47E-56 | 2.6 | RAP1B                 | 1.538793103 |
| ZFAND34        | 8.97E-61 | 0.5422943 | 0.937 | 0.753 | 2.16E-56 | 2.6 | ZFAND3                | 1.24435591  |
| ANKRD33B2      | 9.09E-61 | 0.4978335 | 0.194 | 0.06  | 2.19E-56 | 2.6 | ANKRD33B              | 3.233333333 |
| SMAD34         | 5.76E-60 | 0.6367938 | 0.502 | 0.261 | 1.39E-55 | 2.6 | SMAD3                 | 1.923371648 |
| IRF14          | 7.36E-60 | 0.6195529 | 0.385 | 0.177 | 1.77E-55 | 2.6 | IRF1                  | 2.175141243 |
| ANO63          | 8.19E-60 | 0.5511497 | 0.772 | 0.508 | 1.97E-55 | 2.6 | ANO6                  | 1.519685039 |
| ZBTB104        | 1.23E-59 | 0.6714481 | 0.482 | 0.247 | 2.96E-55 | 2.6 | ZBTB10                | 1.951417004 |
| LRRC13         | 5.39E-59 | 0.4984055 | 0.33  | 0.137 | 1.30E-54 | 2.6 | LRRC1                 | 2.408759124 |
| LSAMP5         | 6.18E-59 | 0.7732892 | 0.699 | 0.461 | 1.49E-54 | 2.6 | LSAMP                 | 1.51626898  |
| ABLIM14        | 7.34E-59 | 0.6572499 | 0.491 | 0.26  | 1.77E-54 | 2.6 | ABLIM1                | 1.888461538 |
| CD2742         | 9.63E-58 | 0.3539822 | 0.128 | 0.031 | 2.32E-53 | 2.6 | CD274                 | 4.129032258 |
| CDYL4          | 3.64E-57 | 0.6215097 | 0.545 | 0.302 | 8.77E-53 | 2.6 | CDYL                  | 1.804635762 |
| ASAP13         | 5.61E-57 | 0.7223046 | 0.51  | 0.284 | 1.35E-52 | 2.6 | ASAP1                 | 1.795774648 |
| NFKB14         | 9.82E-57 | 0.6007917 | 0.695 | 0.44  | 2.37E-52 | 2.6 | NFKB1                 | 1.579545455 |
| ADAMTS42       | 1.15E-56 | 0.4079768 | 0.162 | 0.046 | 2.76E-52 | 2.6 | ADAMTS4               | 3.52173913  |
| GPD23          | 1.72E-56 | 0.7022596 | 0.558 | 0.321 | 4.15E-52 | 2.6 | GPD2                  | 1.738317757 |
| CUX12          | 1.75E-56 | 0.517204  | 0.596 | 0.339 | 4.21E-52 | 2.6 | CUX1                  | 1.758112094 |
| UGCG3          | 1.95E-56 | 0.5405294 | 0.745 | 0.479 | 4.70E-52 | 2.6 | UGCG                  | 1.555323591 |
| PRRG42         | 3.09E-56 | 0.5868824 | 0.484 | 0.255 | 7.45E-52 | 2.6 | PRRG4                 | 1.898039216 |
| MALAT15        | 4.39E-56 | 0.3017946 | 1     | 1     | 1.06E-51 | 2.6 | MALAT1                | 1           |
| BAZ1A4         | 2.03E-55 | 0.6061866 | 0.62  | 0.374 | 4.90E-51 | 2.6 | BAZ1A                 | 1.657754011 |
| DUSP165        | 5.68E-55 | 0.5494287 | 0.672 | 0.41  | 1.37E-50 | 2.6 | DUSP16                | 1.63902439  |
| CPEB25         | 2.54E-54 | 0.4597798 | 0.564 | 0.299 | 6.11E-50 | 2.6 | CPEB2                 | 1.886287625 |
| TMSB105        | 2.74E-54 | 0.3317931 | 0.928 | 0.724 | 6.61E-50 | 2.6 | TMSB10                | 1.281767956 |
| C1QTNF3-AMACR2 | 4.39E-54 | 0.5738996 | 0.556 | 0.308 | 1.06E-49 | 2.6 | C1QTNF3- <del>A</del> | 1.805194805 |
| TNFAIP84       | 4.87E-54 | 0.5568468 | 0.623 | 0.375 | 1.18E-49 | 2.6 | TNFAIP8               | 1.661333333 |
| B4GALT12       | 1.17E-53 | 0.6036236 | 0.672 | 0.43  | 2.82E-49 | 2.6 | B4GALT1               | 1.562790698 |
| TTY142         | 1.01E-52 | 0.7156291 | 0.636 | 0.413 | 2.43E-48 | 2.6 | TTY14                 | 1.539951574 |

|           |          |           |       |       |          |     |          |             |
|-----------|----------|-----------|-------|-------|----------|-----|----------|-------------|
| GNAS5     | 1.05E-52 | 0.4282965 | 0.929 | 0.745 | 2.54E-48 | 2.6 | GNAS     | 1.246979866 |
| NBEA2     | 1.80E-52 | 0.5335963 | 0.472 | 0.242 | 4.34E-48 | 2.6 | NBEA     | 1.950413223 |
| RAB214    | 1.88E-52 | 0.5773197 | 0.473 | 0.254 | 4.54E-48 | 2.6 | RAB21    | 1.862204724 |
| PTHLH5    | 2.41E-52 | 0.4380404 | 0.457 | 0.227 | 5.81E-48 | 2.6 | PTHLH    | 2.013215859 |
| BCL25     | 4.70E-52 | 0.565335  | 0.497 | 0.264 | 1.13E-47 | 2.6 | BCL2     | 1.882575758 |
| APBB23    | 4.91E-52 | 0.6479143 | 0.474 | 0.248 | 1.18E-47 | 2.6 | APBB2    | 1.911290323 |
| FNDC3B3   | 1.53E-51 | 0.5051216 | 0.934 | 0.765 | 3.69E-47 | 2.6 | FNDC3B   | 1.220915033 |
| SPRED22   | 1.98E-51 | 0.5457966 | 0.41  | 0.204 | 4.78E-47 | 2.6 | SPRED2   | 2.009803922 |
| TTC39C2   | 1.45E-50 | 0.5151419 | 0.406 | 0.201 | 3.51E-46 | 2.6 | TTC39C   | 2.019900498 |
| THSD43    | 4.50E-50 | 0.5205631 | 0.806 | 0.552 | 1.09E-45 | 2.6 | THSD4    | 1.460144928 |
| JAG14     | 6.18E-50 | 0.3394182 | 0.138 | 0.038 | 1.49E-45 | 2.6 | JAG1     | 3.631578947 |
| CD443     | 6.45E-50 | 0.5497541 | 0.814 | 0.58  | 1.56E-45 | 2.6 | CD44     | 1.403448276 |
| TJP13     | 1.28E-49 | 0.5451577 | 0.755 | 0.497 | 3.09E-45 | 2.6 | TJP1     | 1.519114688 |
| PTPRK4    | 2.16E-49 | 0.4501307 | 0.927 | 0.764 | 5.20E-45 | 2.6 | PTPRK    | 1.213350785 |
| SLMAP4    | 1.49E-48 | 0.5447992 | 0.857 | 0.666 | 3.60E-44 | 2.6 | SLMAP    | 1.286786787 |
| ARHGEF383 | 1.96E-48 | 0.5753759 | 0.7   | 0.475 | 4.72E-44 | 2.6 | ARHGEF38 | 1.473684211 |
| KAZN2     | 2.38E-48 | 0.6005927 | 0.413 | 0.209 | 5.74E-44 | 2.6 | KAZN     | 1.976076555 |
| STC22     | 2.70E-48 | 0.3980546 | 0.234 | 0.09  | 6.51E-44 | 2.6 | STC2     | 2.6         |
| FAM222A4  | 2.78E-48 | 0.3688619 | 0.138 | 0.039 | 6.70E-44 | 2.6 | FAM222A  | 3.538461538 |
| B4GALT52  | 2.84E-48 | 0.5031043 | 0.523 | 0.296 | 6.84E-44 | 2.6 | B4GALT5  | 1.766891892 |
| RALGAPA13 | 5.93E-48 | 0.575679  | 0.519 | 0.296 | 1.43E-43 | 2.6 | RALGAPA1 | 1.753378378 |
| C8orf45   | 8.91E-48 | 0.1589267 | 0.829 | 0.506 | 2.15E-43 | 2.6 | C8orf4   | 1.638339921 |
| ARNTL23   | 1.35E-47 | 0.5380056 | 0.306 | 0.138 | 3.26E-43 | 2.6 | ARNTL2   | 2.217391304 |
| STAT5B3   | 1.38E-47 | 0.4661245 | 0.564 | 0.322 | 3.33E-43 | 2.6 | STAT5B   | 1.751552795 |
| PVRL24    | 1.81E-47 | 0.4447591 | 0.51  | 0.274 | 4.36E-43 | 2.6 | PVRL2    | 1.861313869 |
| TACSTD23  | 2.61E-47 | 0.471903  | 0.894 | 0.723 | 6.30E-43 | 2.6 | TACSTD2  | 1.236514523 |
| ACSL34    | 2.96E-47 | 0.6833622 | 0.548 | 0.327 | 7.13E-43 | 2.6 | ACSL3    | 1.675840979 |
| ARHGAP422 | 3.03E-47 | 0.5315024 | 0.19  | 0.067 | 7.30E-43 | 2.6 | ARHGAP42 | 2.835820896 |
| DNAJC125  | 4.09E-47 | 0.3291678 | 0.665 | 0.379 | 9.87E-43 | 2.6 | DNAJC12  | 1.754617414 |
| ASH1L3    | 4.29E-47 | 0.5053677 | 0.773 | 0.541 | 1.04E-42 | 2.6 | ASH1L    | 1.42883549  |
| MYO104    | 6.40E-47 | 0.5614433 | 0.457 | 0.245 | 1.54E-42 | 2.6 | MYO10    | 1.865306122 |
| RASEF5    | 1.05E-46 | 0.4250346 | 0.494 | 0.263 | 2.54E-42 | 2.6 | RASEF    | 1.878326996 |
| RASSF51   | 1.25E-46 | 0.3706494 | 0.144 | 0.043 | 3.01E-42 | 2.6 | RASSF5   | 3.348837209 |
| CCBE14    | 2.16E-46 | 0.3517261 | 0.149 | 0.045 | 5.22E-42 | 2.6 | CCBE1    | 3.311111111 |
| MAST44    | 2.48E-46 | 0.5633684 | 0.758 | 0.518 | 5.99E-42 | 2.6 | MAST4    | 1.463320463 |
| SPPL2A3   | 4.80E-46 | 0.5803432 | 0.458 | 0.255 | 1.16E-41 | 2.6 | SPPL2A   | 1.796078431 |
| MAP3K82   | 4.84E-46 | 0.5338992 | 0.505 | 0.292 | 1.17E-41 | 2.6 | MAP3K8   | 1.729452055 |
| RELL12    | 7.86E-46 | 0.4322549 | 0.266 | 0.113 | 1.90E-41 | 2.6 | RELL1    | 2.353982301 |
| AMPH5     | 1.91E-45 | 0.4795568 | 0.238 | 0.095 | 4.61E-41 | 2.6 | AMPH     | 2.505263158 |
| NEDD42    | 2.01E-45 | 0.5102543 | 0.266 | 0.115 | 4.84E-41 | 2.6 | NEDD4    | 2.313043478 |
| UVRAG4    | 2.12E-45 | 0.524155  | 0.694 | 0.455 | 5.12E-41 | 2.6 | UVRAG    | 1.525274725 |
| MAP4K33   | 2.69E-45 | 0.4333373 | 0.464 | 0.249 | 6.49E-41 | 2.6 | MAP4K3   | 1.863453815 |
| FTH14     | 5.32E-45 | 0.3413238 | 0.945 | 0.839 | 1.28E-40 | 2.6 | FTH1     | 1.126340882 |
| CREB53    | 6.50E-45 | 0.5012212 | 0.586 | 0.349 | 1.57E-40 | 2.6 | CREB5    | 1.679083095 |
| BATF5     | 7.24E-45 | 0.4078104 | 0.192 | 0.069 | 1.75E-40 | 2.6 | BATF     | 2.782608696 |
| FXYD35    | 7.95E-45 | 0.4779362 | 0.83  | 0.625 | 1.92E-40 | 2.6 | FXYD3    | 1.328       |
| SGMS12    | 9.80E-45 | 0.6243018 | 0.509 | 0.303 | 2.36E-40 | 2.6 | SGMS1    | 1.679867987 |
| RUNX13    | 1.44E-44 | 0.4138013 | 0.854 | 0.635 | 3.47E-40 | 2.6 | RUNX1    | 1.34488189  |
| RAB27B4   | 1.86E-44 | 0.6042319 | 0.312 | 0.146 | 4.48E-40 | 2.6 | RAB27B   | 2.136986301 |
| UBE2E22   | 3.82E-44 | 0.5489916 | 0.674 | 0.441 | 9.20E-40 | 2.6 | UBE2E2   | 1.528344671 |
| NEDD4L4   | 5.12E-44 | 0.4465971 | 0.798 | 0.59  | 1.23E-39 | 2.6 | NEDD4L   | 1.352542373 |
| PEBP45    | 8.43E-44 | 0.4189663 | 0.227 | 0.09  | 2.03E-39 | 2.6 | PEBP4    | 2.522222222 |

|                |          |           |       |       |          |     |           |             |
|----------------|----------|-----------|-------|-------|----------|-----|-----------|-------------|
| HS6ST24        | 1.46E-43 | 0.5225753 | 0.308 | 0.14  | 3.52E-39 | 2.6 | HS6ST2    | 2.2         |
| PAN33          | 1.51E-43 | 0.5179973 | 0.831 | 0.63  | 3.65E-39 | 2.6 | PAN3      | 1.319047619 |
| ARHGEF32       | 1.79E-43 | 0.484875  | 0.604 | 0.374 | 4.33E-39 | 2.6 | ARHGEF3   | 1.614973262 |
| PLAUR2         | 1.88E-43 | 0.5892129 | 0.367 | 0.184 | 4.54E-39 | 2.6 | PLAUR     | 1.994565217 |
| TBC1D18        | 2.45E-43 | 0.5656069 | 0.399 | 0.211 | 5.90E-39 | 2.6 | TBC1D1    | 1.890995261 |
| SLC44A44       | 3.54E-43 | 0.4086411 | 0.261 | 0.112 | 8.54E-39 | 2.6 | SLC44A4   | 2.330357143 |
| RAB11A3        | 7.89E-43 | 0.5066749 | 0.831 | 0.633 | 1.90E-38 | 2.6 | RAB11A    | 1.312796209 |
| PLXND12        | 2.06E-42 | 0.288438  | 0.11  | 0.029 | 4.96E-38 | 2.6 | PLXND1    | 3.793103448 |
| ABCC32         | 2.73E-42 | 0.4356399 | 0.202 | 0.078 | 6.57E-38 | 2.6 | ABCC3     | 2.58974359  |
| TMEM1564       | 3.56E-42 | 0.2902294 | 0.146 | 0.046 | 8.59E-38 | 2.6 | TMEM156   | 3.173913043 |
| ERBB45         | 4.17E-42 | 0.1174918 | 0.806 | 0.479 | 1.01E-37 | 2.6 | ERBB4     | 1.682672234 |
| NR6A14         | 5.56E-42 | 0.4487391 | 0.573 | 0.342 | 1.34E-37 | 2.6 | NR6A1     | 1.675438596 |
| TTL53          | 6.58E-42 | 0.4764613 | 0.485 | 0.275 | 1.59E-37 | 2.6 | TTL5      | 1.763636364 |
| SOX44          | 7.31E-42 | 0.4294463 | 0.966 | 0.833 | 1.76E-37 | 2.6 | SOX4      | 1.159663866 |
| ETS23          | 1.11E-41 | 0.4544403 | 0.354 | 0.179 | 2.69E-37 | 2.6 | ETS2      | 1.977653631 |
| DDR14          | 2.63E-41 | 0.4484847 | 0.394 | 0.209 | 6.35E-37 | 2.6 | DDR1      | 1.885167464 |
| NRIP14         | 2.64E-41 | 0.4211611 | 0.473 | 0.26  | 6.37E-37 | 2.6 | NRIP1     | 1.819230769 |
| LYST3          | 2.82E-41 | 0.5163165 | 0.467 | 0.265 | 6.80E-37 | 2.6 | LYST      | 1.762264151 |
| ECT25          | 3.71E-41 | 0.4116735 | 0.385 | 0.198 | 8.94E-37 | 2.6 | ECT2      | 1.944444444 |
| PTPRJ3         | 3.73E-41 | 0.4806544 | 0.516 | 0.298 | 9.01E-37 | 2.6 | PTPRJ     | 1.731543624 |
| DPYD3          | 4.91E-41 | 0.5216663 | 0.726 | 0.51  | 1.18E-36 | 2.6 | DPYD      | 1.423529412 |
| TRIM443        | 1.07E-40 | 0.4525626 | 0.32  | 0.156 | 2.58E-36 | 2.6 | TRIM44    | 2.051282051 |
| SIK22          | 1.81E-40 | 0.5037875 | 0.527 | 0.316 | 4.35E-36 | 2.6 | SIK2      | 1.667721519 |
| INADL3         | 3.34E-40 | 0.4227098 | 0.951 | 0.815 | 8.06E-36 | 2.6 | INADL     | 1.166871166 |
| STAT32         | 3.56E-40 | 0.4981172 | 0.75  | 0.529 | 8.58E-36 | 2.6 | STAT3     | 1.417769376 |
| LAMC23         | 6.63E-40 | 0.4495997 | 0.451 | 0.256 | 1.60E-35 | 2.6 | LAMC2     | 1.76171875  |
| GCH12          | 1.01E-39 | 0.336201  | 0.236 | 0.099 | 2.43E-35 | 2.6 | GCH1      | 2.383838384 |
| ABCA52         | 1.02E-39 | 0.4564713 | 0.26  | 0.117 | 2.45E-35 | 2.6 | ABCA5     | 2.222222222 |
| IER34          | 2.86E-39 | 0.3900862 | 0.53  | 0.31  | 6.90E-35 | 2.6 | IER3      | 1.709677419 |
| CAMTA13        | 3.21E-39 | 0.5068609 | 0.768 | 0.574 | 7.74E-35 | 2.6 | CAMTA1    | 1.337979094 |
| CD92           | 3.61E-39 | 0.4589085 | 0.598 | 0.378 | 8.70E-35 | 2.6 | CD9       | 1.582010582 |
| HSPB84         | 3.87E-39 | 0.348738  | 0.187 | 0.071 | 9.34E-35 | 2.6 | HSPB8     | 2.633802817 |
| MYO1E2         | 7.16E-39 | 0.5598616 | 0.677 | 0.467 | 1.73E-34 | 2.6 | MYO1E     | 1.449678801 |
| OPHN12         | 1.99E-38 | 0.3797018 | 0.534 | 0.32  | 4.79E-34 | 2.6 | OPHN1     | 1.66875     |
| DUSP105        | 3.43E-38 | 0.3987376 | 0.41  | 0.217 | 8.27E-34 | 2.6 | DUSP10    | 1.889400922 |
| RELB3          | 4.15E-38 | 0.3954872 | 0.276 | 0.129 | 1.00E-33 | 2.6 | RELB      | 2.139534884 |
| GPBP14         | 4.42E-38 | 0.4009415 | 0.866 | 0.68  | 1.07E-33 | 2.6 | GPBP1     | 1.273529412 |
| COX6C5         | 4.93E-38 | 0.4082429 | 0.903 | 0.756 | 1.19E-33 | 2.6 | COX6C     | 1.194444444 |
| RNF19B2        | 5.05E-38 | 0.486892  | 0.285 | 0.136 | 1.22E-33 | 2.6 | RNF19B    | 2.095588235 |
| GSK3B4         | 9.13E-38 | 0.4848232 | 0.615 | 0.39  | 2.20E-33 | 2.6 | GSK3B     | 1.576923077 |
| FBXO323        | 9.38E-38 | 0.3498797 | 0.582 | 0.36  | 2.26E-33 | 2.6 | FBXO32    | 1.616666667 |
| FLVCR22        | 1.15E-37 | 0.2706929 | 0.121 | 0.037 | 2.78E-33 | 2.6 | FLVCR2    | 3.27027027  |
| THR2           | 1.55E-37 | 0.3416203 | 0.688 | 0.451 | 3.75E-33 | 2.6 | THR2      | 1.525498891 |
| RPS6KA34       | 1.88E-37 | 0.4491407 | 0.69  | 0.454 | 4.54E-33 | 2.6 | RPS6KA3   | 1.519823789 |
| USP343         | 2.26E-37 | 0.3988232 | 0.854 | 0.643 | 5.46E-33 | 2.6 | USP34     | 1.3281493   |
| RAB3IP1        | 2.99E-37 | 0.4139319 | 0.286 | 0.135 | 7.20E-33 | 2.6 | RAB3IP    | 2.118518519 |
| MT-ND33        | 3.14E-37 | 0.3303211 | 0.995 | 0.987 | 7.57E-33 | 2.6 | MT-ND3    | 1.00810537  |
| RP11-131L23.12 | 4.82E-37 | 0.4704216 | 0.222 | 0.096 | 1.16E-32 | 2.6 | RP11-131L | 2.3125      |
| ARFGEF23       | 1.07E-36 | 0.4231909 | 0.584 | 0.364 | 2.58E-32 | 2.6 | ARFGEF2   | 1.604395604 |
| ATP2B43        | 1.17E-36 | 0.4915576 | 0.553 | 0.349 | 2.83E-32 | 2.6 | ATP2B4    | 1.584527221 |
| LMCD15         | 1.40E-36 | 0.5072616 | 0.233 | 0.103 | 3.38E-32 | 2.6 | LMCD1     | 2.262135922 |
| HIST1H2AC4     | 1.43E-36 | 0.4243885 | 0.573 | 0.357 | 3.46E-32 | 2.6 | HIST1H2AC | 1.605042017 |

|              |          |           |       |       |          |     |            |             |
|--------------|----------|-----------|-------|-------|----------|-----|------------|-------------|
| CCDC932      | 1.57E-36 | 0.3859063 | 0.29  | 0.141 | 3.80E-32 | 2.6 | CCDC93     | 2.056737589 |
| MIR4435-2HG3 | 1.80E-36 | 0.4755024 | 0.711 | 0.494 | 4.34E-32 | 2.6 | MIR4435-2  | 1.439271255 |
| TBC1D94      | 1.88E-36 | 0.3282088 | 0.681 | 0.439 | 4.54E-32 | 2.6 | TBC1D9     | 1.551252847 |
| ABCA43       | 1.94E-36 | 0.3167763 | 0.132 | 0.043 | 4.67E-32 | 2.6 | ABCA4      | 3.069767442 |
| JAK14        | 2.83E-36 | 0.4948111 | 0.601 | 0.399 | 6.82E-32 | 2.6 | JAK1       | 1.506265664 |
| NAALADL24    | 2.99E-36 | 0.437747  | 0.718 | 0.493 | 7.22E-32 | 2.6 | NAALADL2   | 1.456389452 |
| CAB394       | 5.85E-36 | 0.4672492 | 0.554 | 0.353 | 1.41E-31 | 2.6 | CAB39      | 1.569405099 |
| FGD63        | 6.37E-36 | 0.4621382 | 0.541 | 0.336 | 1.54E-31 | 2.6 | FGD6       | 1.610119048 |
| AF127936.94  | 6.46E-36 | 0.4192802 | 0.289 | 0.14  | 1.56E-31 | 2.6 | AF127936.! | 2.064285714 |
| CEBPB3       | 7.02E-36 | 0.3936181 | 0.323 | 0.164 | 1.69E-31 | 2.6 | CEBPB      | 1.969512195 |
| LAMA14       | 7.13E-36 | 0.6898104 | 0.226 | 0.1   | 1.72E-31 | 2.6 | LAMA1      | 2.26        |
| RB1CC13      | 7.52E-36 | 0.4545791 | 0.678 | 0.474 | 1.81E-31 | 2.6 | RB1CC1     | 1.430379747 |
| TSPAN155     | 1.64E-35 | 0.338873  | 0.227 | 0.099 | 3.96E-31 | 2.6 | TSPAN15    | 2.292929293 |
| FCHSD23      | 3.15E-35 | 0.4204083 | 0.265 | 0.125 | 7.60E-31 | 2.6 | FCHSD2     | 2.12        |
| TPBG3        | 3.39E-35 | 0.3639624 | 0.342 | 0.177 | 8.17E-31 | 2.6 | TPBG       | 1.93220339  |
| AC018359.12  | 3.82E-35 | 0.3419656 | 0.114 | 0.035 | 9.21E-31 | 2.6 | AC018359.  | 3.257142857 |
| ANKRD125     | 5.33E-35 | 0.3728644 | 0.854 | 0.665 | 1.29E-30 | 2.6 | ANKRD12    | 1.284210526 |
| USP431       | 5.70E-35 | 0.3932001 | 0.216 | 0.094 | 1.37E-30 | 2.6 | USP43      | 2.29787234  |
| ZNF385C      | 6.10E-35 | 0.2956505 | 0.121 | 0.039 | 1.47E-30 | 2.6 | ZNF385C    | 3.102564103 |
| PTPRG5       | 1.29E-34 | 0.4998128 | 0.453 | 0.269 | 3.11E-30 | 2.6 | PTPRG      | 1.68401487  |
| IGFBP25      | 3.03E-34 | 0.2783527 | 0.135 | 0.046 | 7.31E-30 | 2.6 | IGFBP2     | 2.934782609 |
| MICAL22      | 5.58E-34 | 0.3598139 | 0.277 | 0.133 | 1.35E-29 | 2.6 | MICAL2     | 2.082706767 |
| KLF43        | 5.59E-34 | 0.377681  | 0.233 | 0.107 | 1.35E-29 | 2.6 | KLF4       | 2.177570093 |
| NBPF13       | 6.35E-34 | 0.2894434 | 0.113 | 0.036 | 1.53E-29 | 2.6 | NBPF1      | 3.138888889 |
| ANXA53       | 1.19E-33 | 0.4239176 | 0.561 | 0.357 | 2.86E-29 | 2.6 | ANXA5      | 1.571428571 |
| SIPA1L33     | 1.45E-33 | 0.3393162 | 0.376 | 0.207 | 3.49E-29 | 2.6 | SIPA1L3    | 1.816425121 |
| ITPR33       | 1.65E-33 | 0.3541637 | 0.182 | 0.074 | 3.97E-29 | 2.6 | ITPR3      | 2.459459459 |
| CD473        | 1.85E-33 | 0.3930523 | 0.608 | 0.407 | 4.46E-29 | 2.6 | CD47       | 1.493857494 |
| HERC43       | 2.38E-33 | 0.3704134 | 0.739 | 0.518 | 5.73E-29 | 2.6 | HERC4      | 1.426640927 |
| MYBL12       | 2.54E-33 | 0.4070424 | 0.173 | 0.069 | 6.12E-29 | 2.6 | MYBL1      | 2.507246377 |
| TRAK12       | 3.02E-33 | 0.4356264 | 0.351 | 0.191 | 7.29E-29 | 2.6 | TRAK1      | 1.837696335 |
| SEMA5A1      | 3.32E-33 | 0.2367054 | 0.078 | 0.02  | 8.01E-29 | 2.6 | SEMA5A     | 3.9         |
| NPAS23       | 3.38E-33 | 0.3835355 | 0.569 | 0.363 | 8.16E-29 | 2.6 | NPAS2      | 1.567493113 |
| KIAA12173    | 4.32E-33 | 0.303226  | 0.952 | 0.795 | 1.04E-28 | 2.6 | KIAA1217   | 1.197484277 |
| PARD33       | 4.46E-33 | 0.4477481 | 0.816 | 0.634 | 1.07E-28 | 2.6 | PARD3      | 1.287066246 |
| MT-ND13      | 5.18E-33 | 0.2207442 | 0.994 | 0.979 | 1.25E-28 | 2.6 | MT-ND1     | 1.015321757 |
| SPINT12      | 5.25E-33 | 0.3569223 | 0.336 | 0.178 | 1.26E-28 | 2.6 | SPINT1     | 1.887640449 |
| CDK83        | 5.28E-33 | 0.4588129 | 0.407 | 0.234 | 1.27E-28 | 2.6 | CDK8       | 1.739316239 |
| GTDC12       | 6.08E-33 | 0.4199517 | 0.222 | 0.101 | 1.47E-28 | 2.6 | GTDC1      | 2.198019802 |
| CFB2         | 6.09E-33 | 0.4845979 | 0.292 | 0.149 | 1.47E-28 | 2.6 | CFB        | 1.959731544 |
| SMCHD14      | 6.73E-33 | 0.4389742 | 0.596 | 0.4   | 1.62E-28 | 2.6 | SMCHD1     | 1.49        |
| SCGB1D23     | 7.91E-33 | 0.4781226 | 0.245 | 0.114 | 1.91E-28 | 2.6 | SCGB1D2    | 2.149122807 |
| ADAM323      | 1.06E-32 | 0.3320398 | 0.4   | 0.223 | 2.55E-28 | 2.6 | ADAM32     | 1.793721973 |
| DNAJB64      | 2.85E-32 | 0.4718959 | 0.569 | 0.375 | 6.88E-28 | 2.6 | DNAJB6     | 1.517333333 |
| PSD34        | 3.22E-32 | 0.4544577 | 0.535 | 0.339 | 7.77E-28 | 2.6 | PSD3       | 1.578171091 |
| PDGFB3       | 3.63E-32 | 0.2998957 | 0.114 | 0.037 | 8.76E-28 | 2.6 | PDGFB      | 3.081081081 |
| GULP13       | 4.74E-32 | 0.3801292 | 0.365 | 0.201 | 1.14E-27 | 2.6 | GULP1      | 1.815920398 |
| ST3GAL14     | 4.84E-32 | 0.3548398 | 0.356 | 0.195 | 1.17E-27 | 2.6 | ST3GAL1    | 1.825641026 |
| ARHGEF124    | 4.87E-32 | 0.2957851 | 0.803 | 0.567 | 1.17E-27 | 2.6 | ARHGEF12   | 1.41622575  |
| PLEKHA12     | 6.79E-32 | 0.3367995 | 0.296 | 0.151 | 1.64E-27 | 2.6 | PLEKHA1    | 1.960264901 |
| SSUH22       | 6.81E-32 | 0.2022167 | 0.062 | 0.014 | 1.64E-27 | 2.6 | SSUH2      | 4.428571429 |
| OTUD7A2      | 8.39E-32 | 0.3219611 | 0.216 | 0.096 | 2.02E-27 | 2.6 | OTUD7A     | 2.25        |

|              |          |           |       |       |          |     |           |             |
|--------------|----------|-----------|-------|-------|----------|-----|-----------|-------------|
| LARGE4       | 8.75E-32 | 0.4189446 | 0.513 | 0.32  | 2.11E-27 | 2.6 | LARGE     | 1.603125    |
| KTN15        | 1.19E-31 | 0.3674666 | 0.754 | 0.533 | 2.86E-27 | 2.6 | KTN1      | 1.414634146 |
| MAP3K54      | 1.46E-31 | 0.490913  | 0.551 | 0.358 | 3.51E-27 | 2.6 | MAP3K5    | 1.539106145 |
| AREG5        | 1.65E-31 | 0.1023473 | 0.714 | 0.44  | 3.97E-27 | 2.6 | AREG      | 1.622727273 |
| OXTR1        | 1.71E-31 | 0.1428824 | 0.045 | 0.008 | 4.12E-27 | 2.6 | OXTR      | 5.625       |
| DMXL21       | 1.72E-31 | 0.3391725 | 0.12  | 0.041 | 4.15E-27 | 2.6 | DMXL2     | 2.926829268 |
| NAMPT3       | 2.46E-31 | 0.4057575 | 0.813 | 0.642 | 5.94E-27 | 2.6 | NAMPT     | 1.26635514  |
| AHNAK4       | 2.69E-31 | 0.3985958 | 0.548 | 0.348 | 6.47E-27 | 2.6 | AHNAK     | 1.574712644 |
| RALGAPA21    | 4.71E-31 | 0.4441666 | 0.424 | 0.252 | 1.14E-26 | 2.6 | RALGAPA2  | 1.682539683 |
| FBXL173      | 4.86E-31 | 0.3831724 | 0.436 | 0.259 | 1.17E-26 | 2.6 | FBXL17    | 1.683397683 |
| IER55        | 5.66E-31 | 0.3431318 | 0.23  | 0.108 | 1.36E-26 | 2.6 | IER5      | 2.12962963  |
| ACSL13       | 5.92E-31 | 0.4222488 | 0.355 | 0.198 | 1.43E-26 | 2.6 | ACSL1     | 1.792929293 |
| TNF3         | 7.02E-31 | 0.353892  | 0.187 | 0.081 | 1.69E-26 | 2.6 | TNF       | 2.308641975 |
| MAFF2        | 7.10E-31 | 0.3909982 | 0.382 | 0.219 | 1.71E-26 | 2.6 | MAFF      | 1.744292237 |
| MAP3K18      | 1.04E-30 | 0.2826594 | 0.687 | 0.448 | 2.51E-26 | 2.6 | MAP3K1    | 1.533482143 |
| MED153       | 1.15E-30 | 0.4032294 | 0.318 | 0.166 | 2.77E-26 | 2.6 | MED15     | 1.915662651 |
| GAREM12      | 1.38E-30 | 0.3912262 | 0.498 | 0.313 | 3.33E-26 | 2.6 | GAREM1    | 1.591054313 |
| TTC64        | 1.60E-30 | 0.2629642 | 0.329 | 0.168 | 3.86E-26 | 2.6 | TTC6      | 1.958333333 |
| CYB5A4       | 3.20E-30 | 0.3104382 | 0.435 | 0.252 | 7.71E-26 | 2.6 | CYB5A     | 1.726190476 |
| ARHGAP293    | 3.51E-30 | 0.2210336 | 0.782 | 0.564 | 8.45E-26 | 2.6 | ARHGAP29  | 1.386524823 |
| GPRC5A2      | 6.66E-30 | 0.328486  | 0.584 | 0.383 | 1.61E-25 | 2.6 | GPRC5A    | 1.524804178 |
| ASCC33       | 6.85E-30 | 0.3823666 | 0.404 | 0.237 | 1.65E-25 | 2.6 | ASCC3     | 1.70464135  |
| MIPOL14      | 7.89E-30 | 0.3452324 | 0.332 | 0.178 | 1.90E-25 | 2.6 | MIPOL1    | 1.865168539 |
| NETO22       | 8.01E-30 | 0.3296761 | 0.136 | 0.051 | 1.93E-25 | 2.6 | NETO2     | 2.666666667 |
| TBC1D2B2     | 8.08E-30 | 0.2729344 | 0.107 | 0.035 | 1.95E-25 | 2.6 | TBC1D2B   | 3.057142857 |
| NCOA74       | 1.14E-29 | 0.2944245 | 0.652 | 0.431 | 2.74E-25 | 2.6 | NCOA7     | 1.512761021 |
| RICTOR3      | 1.33E-29 | 0.2936323 | 0.814 | 0.614 | 3.21E-25 | 2.6 | RICTOR    | 1.325732899 |
| SLC7A25      | 1.53E-29 | 0.2182103 | 0.51  | 0.292 | 3.69E-25 | 2.6 | SLC7A2    | 1.746575342 |
| PTAFR2       | 2.16E-29 | 0.1766598 | 0.064 | 0.015 | 5.21E-25 | 2.6 | PTAFR     | 4.266666667 |
| MT-CYB4      | 3.53E-29 | 0.2249344 | 0.995 | 0.991 | 8.52E-25 | 2.6 | MT-CYB    | 1.004036327 |
| CHD23        | 5.09E-29 | 0.2634023 | 0.747 | 0.539 | 1.23E-24 | 2.6 | CHD2      | 1.385899814 |
| CRADD2       | 5.91E-29 | 0.4240414 | 0.28  | 0.145 | 1.42E-24 | 2.6 | CRADD     | 1.931034483 |
| PHF203       | 6.71E-29 | 0.3603556 | 0.546 | 0.349 | 1.62E-24 | 2.6 | PHF20     | 1.564469914 |
| MT-CO34      | 6.93E-29 | 0.2108861 | 0.997 | 0.995 | 1.67E-24 | 2.6 | MT-CO3    | 1.00201005  |
| PARD3B2      | 7.36E-29 | 0.3853174 | 0.349 | 0.196 | 1.78E-24 | 2.6 | PARD3B    | 1.780612245 |
| TMOD34       | 1.01E-28 | 0.363855  | 0.598 | 0.395 | 2.43E-24 | 2.6 | TMOD3     | 1.513924051 |
| HIPK25       | 1.28E-28 | 0.3308878 | 0.569 | 0.365 | 3.08E-24 | 2.6 | HIPK2     | 1.55890411  |
| DLEU23       | 2.10E-28 | 0.3395205 | 0.373 | 0.216 | 5.06E-24 | 2.6 | DLEU2     | 1.726851852 |
| LAMB33       | 2.15E-28 | 0.2577318 | 0.396 | 0.233 | 5.18E-24 | 2.6 | LAMB3     | 1.699570815 |
| TNFRSF10B3   | 2.29E-28 | 0.3419871 | 0.355 | 0.199 | 5.53E-24 | 2.6 | TNFRSF10E | 1.783919598 |
| SAMD4A3      | 3.15E-28 | 0.3756415 | 0.802 | 0.615 | 7.59E-24 | 2.6 | SAMD4A    | 1.304065041 |
| COL4A55      | 4.79E-28 | 0.2802801 | 0.383 | 0.213 | 1.15E-23 | 2.6 | COL4A5    | 1.798122066 |
| ITSN24       | 5.22E-28 | 0.3995895 | 0.444 | 0.273 | 1.26E-23 | 2.6 | ITSN2     | 1.626373626 |
| FAM160A13    | 6.83E-28 | 0.3609737 | 0.808 | 0.643 | 1.65E-23 | 2.6 | FAM160A1  | 1.256609642 |
| FAM177B3     | 7.15E-28 | 0.3078956 | 0.68  | 0.484 | 1.72E-23 | 2.6 | FAM177B   | 1.404958678 |
| PRKG13       | 7.85E-28 | 0.4239295 | 0.273 | 0.144 | 1.89E-23 | 2.6 | PRKG1     | 1.895833333 |
| ZC3HAV14     | 1.20E-27 | 0.2958303 | 0.332 | 0.183 | 2.90E-23 | 2.6 | ZC3HAV1   | 1.81420765  |
| CTNND25      | 2.01E-27 | 0.3194041 | 0.285 | 0.149 | 4.85E-23 | 2.6 | CTNND2    | 1.912751678 |
| RP1-78O14.14 | 2.25E-27 | 0.2939279 | 0.354 | 0.198 | 5.42E-23 | 2.6 | RP1-78O14 | 1.787878788 |
| NAB11        | 3.52E-27 | 0.2645863 | 0.155 | 0.064 | 8.49E-23 | 2.6 | NAB1      | 2.421875    |
| CYLD4        | 3.89E-27 | 0.3699207 | 0.358 | 0.206 | 9.39E-23 | 2.6 | CYLD      | 1.737864078 |
| CSGALNACT23  | 4.47E-27 | 0.3495146 | 0.244 | 0.122 | 1.08E-22 | 2.6 | CSGALNAC  | 2           |

|           |          |           |       |       |          |     |          |             |
|-----------|----------|-----------|-------|-------|----------|-----|----------|-------------|
| AGO23     | 4.90E-27 | 0.3739997 | 0.354 | 0.206 | 1.18E-22 | 2.6 | AGO2     | 1.718446602 |
| PTPRM3    | 8.61E-27 | 0.2623643 | 0.402 | 0.235 | 2.08E-22 | 2.6 | PTPRM    | 1.710638298 |
| SIX43     | 1.03E-26 | 0.2582328 | 0.174 | 0.076 | 2.49E-22 | 2.6 | SIX4     | 2.289473684 |
| ATAD2B3   | 1.08E-26 | 0.3782693 | 0.344 | 0.196 | 2.59E-22 | 2.6 | ATAD2B   | 1.755102041 |
| NDUFV24   | 1.23E-26 | 0.3736231 | 0.428 | 0.265 | 2.95E-22 | 2.6 | NDUFV2   | 1.61509434  |
| MYO64     | 1.30E-26 | 0.2170048 | 0.924 | 0.752 | 3.14E-22 | 2.6 | MYO6     | 1.228723404 |
| NEAT14    | 1.51E-26 | 0.2190558 | 0.998 | 0.945 | 3.64E-22 | 2.6 | NEAT1    | 1.056084656 |
| KLRD13    | 1.53E-26 | 0.3508119 | 0.294 | 0.157 | 3.70E-22 | 2.6 | KLRD1    | 1.872611465 |
| RCN15     | 1.73E-26 | 0.2965692 | 0.282 | 0.149 | 4.17E-22 | 2.6 | RCN1     | 1.89261745  |
| PLD13     | 1.76E-26 | 0.3528194 | 0.246 | 0.125 | 4.23E-22 | 2.6 | PLD1     | 1.968       |
| PERP4     | 1.81E-26 | 0.3344689 | 0.629 | 0.447 | 4.37E-22 | 2.6 | PERP     | 1.407158837 |
| TMEM28    | 1.82E-26 | 0.3356029 | 0.531 | 0.34  | 4.39E-22 | 2.6 | TMEM2    | 1.561764706 |
| YTHDC16   | 2.08E-26 | 0.3880636 | 0.551 | 0.378 | 5.01E-22 | 2.6 | YTHDC1   | 1.457671958 |
| PVRL43    | 2.09E-26 | 0.3351315 | 0.33  | 0.187 | 5.04E-22 | 2.6 | PVRL4    | 1.764705882 |
| RBMS13    | 2.20E-26 | 0.4536426 | 0.515 | 0.337 | 5.29E-22 | 2.6 | RBMS1    | 1.528189911 |
| NCKAP53   | 2.36E-26 | 0.3013054 | 0.316 | 0.173 | 5.69E-22 | 2.6 | NCKAP5   | 1.826589595 |
| STYK15    | 2.75E-26 | 0.2878012 | 0.152 | 0.063 | 6.64E-22 | 2.6 | STYK1    | 2.412698413 |
| NPTN4     | 3.15E-26 | 0.3008966 | 0.337 | 0.19  | 7.60E-22 | 2.6 | NPTN     | 1.773684211 |
| ZEB13     | 3.21E-26 | 0.2791373 | 0.132 | 0.052 | 7.75E-22 | 2.6 | ZEB1     | 2.538461538 |
| TBK11     | 3.23E-26 | 0.3688101 | 0.458 | 0.287 | 7.78E-22 | 2.6 | TBK1     | 1.595818815 |
| TAB22     | 4.84E-26 | 0.3269568 | 0.444 | 0.277 | 1.17E-21 | 2.6 | TAB2     | 1.602888087 |
| SPG113    | 4.94E-26 | 0.3175146 | 0.461 | 0.288 | 1.19E-21 | 2.6 | SPG11    | 1.600694444 |
| UBR23     | 5.57E-26 | 0.4095274 | 0.557 | 0.383 | 1.34E-21 | 2.6 | UBR2     | 1.454308094 |
| SERF25    | 6.70E-26 | 0.1733388 | 0.592 | 0.386 | 1.62E-21 | 2.6 | SERF2    | 1.533678756 |
| DIO2-AS14 | 7.12E-26 | 0.2610941 | 0.179 | 0.08  | 1.72E-21 | 2.6 | DIO2-AS1 | 2.2375      |
| TNS13     | 1.31E-25 | 0.2452328 | 0.114 | 0.042 | 3.16E-21 | 2.6 | TNS1     | 2.714285714 |
| RGS161    | 1.35E-25 | 0.1539388 | 0.041 | 0.008 | 3.25E-21 | 2.6 | RGS16    | 5.125       |
| ITGA54    | 1.41E-25 | 0.3071609 | 0.202 | 0.096 | 3.39E-21 | 2.6 | ITGA5    | 2.104166667 |
| C6orf1321 | 2.23E-25 | 0.3176974 | 0.275 | 0.148 | 5.39E-21 | 2.6 | C6orf132 | 1.858108108 |
| CNOT42    | 2.27E-25 | 0.3484499 | 0.576 | 0.393 | 5.48E-21 | 2.6 | CNOT4    | 1.465648855 |
| MT-ATP62  | 2.77E-25 | 0.1860069 | 0.995 | 0.991 | 6.68E-21 | 2.6 | MT-ATP6  | 1.004036327 |
| TOP15     | 2.92E-25 | 0.3193349 | 0.624 | 0.439 | 7.03E-21 | 2.6 | TOP1     | 1.421412301 |
| SMIM145   | 3.29E-25 | 0.2642747 | 0.596 | 0.391 | 7.94E-21 | 2.6 | SMIM14   | 1.524296675 |
| SHANK22   | 4.80E-25 | 0.3123721 | 0.38  | 0.226 | 1.16E-20 | 2.6 | SHANK2   | 1.681415929 |
| CD993     | 5.31E-25 | 0.3235196 | 0.253 | 0.132 | 1.28E-20 | 2.6 | CD99     | 1.916666667 |
| AIM13     | 5.55E-25 | 0.315122  | 0.634 | 0.438 | 1.34E-20 | 2.6 | AIM1     | 1.447488584 |
| MSN4      | 9.33E-25 | 0.360121  | 0.584 | 0.413 | 2.25E-20 | 2.6 | MSN      | 1.414043584 |
| MAML32    | 1.01E-24 | 0.2978731 | 0.52  | 0.344 | 2.43E-20 | 2.6 | MAML3    | 1.511627907 |
| SERHL23   | 1.17E-24 | 0.3071297 | 0.256 | 0.135 | 2.82E-20 | 2.6 | SERHL2   | 1.896296296 |
| CUL4A3    | 1.46E-24 | 0.2925796 | 0.312 | 0.175 | 3.52E-20 | 2.6 | CUL4A    | 1.782857143 |
| PATL11    | 1.82E-24 | 0.2664525 | 0.261 | 0.138 | 4.39E-20 | 2.6 | PATL1    | 1.891304348 |
| AZIN15    | 1.98E-24 | 0.2859091 | 0.345 | 0.199 | 4.79E-20 | 2.6 | AZIN1    | 1.733668342 |
| NBAT13    | 2.10E-24 | 0.3103    | 0.226 | 0.114 | 5.06E-20 | 2.6 | NBAT1    | 1.98245614  |
| TBC1D84   | 2.15E-24 | 0.382912  | 0.607 | 0.422 | 5.18E-20 | 2.6 | TBC1D8   | 1.438388626 |
| ANKRD442  | 2.22E-24 | 0.3384605 | 0.163 | 0.074 | 5.35E-20 | 2.6 | ANKRD44  | 2.202702703 |
| CLIC64    | 2.25E-24 | 0.2615762 | 0.366 | 0.212 | 5.44E-20 | 2.6 | CLIC6    | 1.726415094 |
| ARL5B2    | 2.29E-24 | 0.3085555 | 0.211 | 0.104 | 5.52E-20 | 2.6 | ARL5B    | 2.028846154 |
| REPS13    | 2.58E-24 | 0.3203506 | 0.472 | 0.302 | 6.22E-20 | 2.6 | REPS1    | 1.562913907 |
| RALA3     | 2.60E-24 | 0.3219252 | 0.355 | 0.209 | 6.28E-20 | 2.6 | RALA     | 1.698564593 |
| BID2      | 2.74E-24 | 0.2788269 | 0.247 | 0.128 | 6.61E-20 | 2.6 | BID      | 1.9296875   |
| CHMP4B4   | 2.89E-24 | 0.2851475 | 0.329 | 0.186 | 6.96E-20 | 2.6 | CHMP4B   | 1.768817204 |
| NFAT54    | 3.36E-24 | 0.2576899 | 0.797 | 0.622 | 8.10E-20 | 2.6 | NFAT5    | 1.281350482 |



|               |          |           |       |       |          |     |            |             |
|---------------|----------|-----------|-------|-------|----------|-----|------------|-------------|
| KMT2A3        | 4.11E-24 | 0.2989166 | 0.608 | 0.413 | 9.92E-20 | 2.6 | KMT2A      | 1.472154964 |
| UXS14         | 4.48E-24 | 0.2590708 | 0.187 | 0.088 | 1.08E-19 | 2.6 | UXS1       | 2.125       |
| NFKBIE2       | 6.31E-24 | 0.190918  | 0.084 | 0.027 | 1.52E-19 | 2.6 | NFKBIE     | 3.111111111 |
| OPN34         | 6.56E-24 | 0.2856015 | 0.19  | 0.092 | 1.58E-19 | 2.6 | OPN3       | 2.065217391 |
| SMYD32        | 8.01E-24 | 0.2818516 | 0.509 | 0.334 | 1.93E-19 | 2.6 | SMYD3      | 1.523952096 |
| WWC14         | 9.03E-24 | 0.3455323 | 0.586 | 0.412 | 2.18E-19 | 2.6 | WWC1       | 1.422330097 |
| FNDC3A2       | 1.11E-23 | 0.4097233 | 0.526 | 0.363 | 2.67E-19 | 2.6 | FNDC3A     | 1.449035813 |
| EXPH52        | 1.23E-23 | 0.3255618 | 0.309 | 0.175 | 2.96E-19 | 2.6 | EXPH5      | 1.765714286 |
| PSTPIP22      | 1.46E-23 | 0.2937396 | 0.367 | 0.219 | 3.53E-19 | 2.6 | PSTPIP2    | 1.675799087 |
| PGR4          | 1.52E-23 | 0.3061902 | 0.172 | 0.079 | 3.66E-19 | 2.6 | PGR        | 2.17721519  |
| TMEM45B4      | 1.69E-23 | 0.2868815 | 0.29  | 0.161 | 4.07E-19 | 2.6 | TMEM45B    | 1.801242236 |
| SOCS23        | 1.69E-23 | 0.180762  | 0.074 | 0.023 | 4.08E-19 | 2.6 | SOCS2      | 3.217391304 |
| TOM1L23       | 1.88E-23 | 0.3017569 | 0.467 | 0.294 | 4.54E-19 | 2.6 | TOM1L2     | 1.588435374 |
| IL4R3         | 2.16E-23 | 0.2660491 | 0.256 | 0.137 | 5.22E-19 | 2.6 | IL4R       | 1.868613139 |
| BRAF3         | 2.22E-23 | 0.3477562 | 0.6   | 0.413 | 5.36E-19 | 2.6 | BRAF       | 1.452784504 |
| TLE13         | 2.30E-23 | 0.3081741 | 0.356 | 0.213 | 5.56E-19 | 2.6 | TLE1       | 1.671361502 |
| WNT5A2        | 2.65E-23 | 0.2446171 | 0.101 | 0.037 | 6.39E-19 | 2.6 | WNT5A      | 2.72972973  |
| ANKRD112      | 2.75E-23 | 0.3333761 | 0.477 | 0.315 | 6.63E-19 | 2.6 | ANKRD11    | 1.514285714 |
| ARID1A2       | 3.97E-23 | 0.2805135 | 0.387 | 0.235 | 9.57E-19 | 2.6 | ARID1A     | 1.646808511 |
| MYO1D4        | 4.15E-23 | 0.3362886 | 0.479 | 0.311 | 1.00E-18 | 2.6 | MYO1D      | 1.540192926 |
| RP3-523E19.22 | 4.42E-23 | 0.2022919 | 0.107 | 0.04  | 1.07E-18 | 2.6 | RP3-523E1' | 2.675       |
| KIAA13245     | 4.52E-23 | 0.2867299 | 0.374 | 0.223 | 1.09E-18 | 2.6 | KIAA1324   | 1.677130045 |
| F33           | 5.20E-23 | 0.2710963 | 0.214 | 0.107 | 1.25E-18 | 2.6 | F3         | 2           |
| SNX102        | 6.46E-23 | 0.2667053 | 0.151 | 0.067 | 1.56E-18 | 2.6 | SNX10      | 2.253731343 |
| FNBP13        | 6.65E-23 | 0.2995723 | 0.712 | 0.519 | 1.60E-18 | 2.6 | FNBP1      | 1.371868979 |
| TIMP22        | 6.96E-23 | 0.2005541 | 0.145 | 0.062 | 1.68E-18 | 2.6 | TIMP2      | 2.338709677 |
| MB21D22       | 7.62E-23 | 0.2788354 | 0.19  | 0.092 | 1.84E-18 | 2.6 | MB21D2     | 2.065217391 |
| ATP6AP13      | 7.89E-23 | 0.1972122 | 0.126 | 0.051 | 1.90E-18 | 2.6 | ATP6AP1    | 2.470588235 |
| LTBP14        | 8.59E-23 | 0.2638835 | 0.331 | 0.195 | 2.07E-18 | 2.6 | LTBP1      | 1.697435897 |
| ABHD183       | 8.76E-23 | 0.3370934 | 0.508 | 0.338 | 2.11E-18 | 2.6 | ABHD18     | 1.50295858  |
| SPIDR4        | 9.82E-23 | 0.2476622 | 0.784 | 0.593 | 2.37E-18 | 2.6 | SPIDR      | 1.322091062 |
| EIF4G33       | 1.07E-22 | 0.2469889 | 0.701 | 0.504 | 2.57E-18 | 2.6 | EIF4G3     | 1.390873016 |
| URGCP1        | 1.12E-22 | 0.2088548 | 0.106 | 0.04  | 2.71E-18 | 2.6 | URGCP      | 2.65        |
| MYH94         | 1.13E-22 | 0.2134079 | 0.704 | 0.507 | 2.73E-18 | 2.6 | MYH9       | 1.388560158 |
| CNN34         | 1.35E-22 | 0.2993734 | 0.692 | 0.508 | 3.26E-18 | 2.6 | CNN3       | 1.362204724 |
| CREBBP3       | 1.38E-22 | 0.2936005 | 0.452 | 0.294 | 3.33E-18 | 2.6 | CREBBP     | 1.537414966 |
| CRY21         | 1.59E-22 | 0.3165393 | 0.197 | 0.099 | 3.83E-18 | 2.6 | CRY2       | 1.98989899  |
| USP475        | 1.72E-22 | 0.2701662 | 0.601 | 0.414 | 4.16E-18 | 2.6 | USP47      | 1.451690821 |
| AR5           | 2.04E-22 | 0.2959425 | 0.284 | 0.155 | 4.93E-18 | 2.6 | AR         | 1.832258065 |
| ABAT3         | 2.10E-22 | 0.2851896 | 0.131 | 0.055 | 5.06E-18 | 2.6 | ABAT       | 2.381818182 |
| ATXN13        | 2.14E-22 | 0.2058881 | 0.704 | 0.507 | 5.17E-18 | 2.6 | ATXN1      | 1.388560158 |
| SSH23         | 2.17E-22 | 0.3516935 | 0.553 | 0.384 | 5.24E-18 | 2.6 | SSH2       | 1.440104167 |
| WWC23         | 2.29E-22 | 0.2892167 | 0.33  | 0.193 | 5.52E-18 | 2.6 | WWC2       | 1.70984456  |
| SRGAP24       | 2.60E-22 | 0.3341853 | 0.26  | 0.143 | 6.26E-18 | 2.6 | SRGAP2     | 1.818181818 |
| EFTUD12       | 2.63E-22 | 0.2890062 | 0.272 | 0.151 | 6.35E-18 | 2.6 | EFTUD1     | 1.801324503 |
| IFNGR12       | 2.78E-22 | 0.3452442 | 0.414 | 0.266 | 6.70E-18 | 2.6 | IFNGR1     | 1.556390977 |
| IL6ST4        | 3.01E-22 | 0.3112083 | 0.491 | 0.327 | 7.27E-18 | 2.6 | IL6ST      | 1.501529052 |
| CDKL44        | 3.26E-22 | 0.1833131 | 0.074 | 0.023 | 7.85E-18 | 2.6 | CDKL4      | 3.217391304 |
| EPB41L54      | 3.39E-22 | 0.329284  | 0.453 | 0.29  | 8.17E-18 | 2.6 | EPB41L5    | 1.562068966 |
| TSC22D33      | 4.08E-22 | 0.2460809 | 0.318 | 0.182 | 9.84E-18 | 2.6 | TSC22D3    | 1.747252747 |
| AC007319.15   | 4.11E-22 | 0.2402792 | 0.18  | 0.086 | 9.92E-18 | 2.6 | AC007319.  | 2.093023256 |
| CMYA53        | 4.43E-22 | 0.3313562 | 0.201 | 0.102 | 1.07E-17 | 2.6 | CMYA5      | 1.970588235 |

|                |          |           |       |       |          |     |           |             |
|----------------|----------|-----------|-------|-------|----------|-----|-----------|-------------|
| RANBP94        | 5.17E-22 | 0.3014886 | 0.452 | 0.293 | 1.25E-17 | 2.6 | RANBP9    | 1.542662116 |
| TP53INP12      | 6.94E-22 | 0.2627135 | 0.166 | 0.078 | 1.67E-17 | 2.6 | TP53INP1  | 2.128205128 |
| YAP13          | 7.13E-22 | 0.265796  | 0.712 | 0.527 | 1.72E-17 | 2.6 | YAP1      | 1.351043643 |
| GEM2           | 8.15E-22 | 0.2537894 | 0.117 | 0.048 | 1.97E-17 | 2.6 | GEM       | 2.4375      |
| FMNL3          | 1.00E-21 | 0.1545608 | 0.058 | 0.016 | 2.42E-17 | 2.6 | FMNL3     | 3.625       |
| UBL34          | 1.01E-21 | 0.3045274 | 0.331 | 0.197 | 2.44E-17 | 2.6 | UBL3      | 1.680203046 |
| ZNF7042        | 1.23E-21 | 0.2893711 | 0.282 | 0.16  | 2.97E-17 | 2.6 | ZNF704    | 1.7625      |
| FOSL22         | 1.35E-21 | 0.3207127 | 0.381 | 0.237 | 3.25E-17 | 2.6 | FOSL2     | 1.607594937 |
| TNFSF13B3      | 1.69E-21 | 0.1881795 | 0.119 | 0.048 | 4.07E-17 | 2.6 | TNFSF13B  | 2.479166667 |
| NEO12          | 2.05E-21 | 0.2693236 | 0.189 | 0.094 | 4.93E-17 | 2.6 | NEO1      | 2.010638298 |
| RASSF63        | 2.17E-21 | 0.2172189 | 0.149 | 0.067 | 5.22E-17 | 2.6 | RASSF6    | 2.223880597 |
| DGKH3          | 2.28E-21 | 0.2567085 | 0.468 | 0.302 | 5.50E-17 | 2.6 | DGKH      | 1.549668874 |
| LITAF3         | 2.29E-21 | 0.3029507 | 0.606 | 0.431 | 5.51E-17 | 2.6 | LITAF     | 1.406032483 |
| ERBB2IP4       | 3.05E-21 | 0.2121755 | 0.606 | 0.421 | 7.36E-17 | 2.6 | ERBB2IP   | 1.439429929 |
| REL3           | 3.25E-21 | 0.3987566 | 0.44  | 0.295 | 7.84E-17 | 2.6 | REL       | 1.491525424 |
| NR4A24         | 3.26E-21 | 0.2679105 | 0.208 | 0.107 | 7.87E-17 | 2.6 | NR4A2     | 1.943925234 |
| DSTN3          | 3.33E-21 | 0.2188526 | 0.756 | 0.577 | 8.02E-17 | 2.6 | DSTN      | 1.310225303 |
| HIST1H2BJ2     | 3.35E-21 | 0.3348792 | 0.234 | 0.128 | 8.07E-17 | 2.6 | HIST1H2BJ | 1.828125    |
| LSM14A3        | 3.76E-21 | 0.2751666 | 0.517 | 0.344 | 9.05E-17 | 2.6 | LSM14A    | 1.502906977 |
| CLIC44         | 3.87E-21 | 0.2748602 | 0.731 | 0.554 | 9.33E-17 | 2.6 | CLIC4     | 1.319494585 |
| DUSP54         | 4.44E-21 | 0.2552355 | 0.383 | 0.233 | 1.07E-16 | 2.6 | DUSP5     | 1.643776824 |
| FEM1B4         | 5.28E-21 | 0.2696349 | 0.289 | 0.165 | 1.27E-16 | 2.6 | FEM1B     | 1.751515152 |
| MYCBP23        | 5.51E-21 | 0.2624816 | 0.374 | 0.229 | 1.33E-16 | 2.6 | MYCBP2    | 1.633187773 |
| TEAD14         | 6.44E-21 | 0.3302745 | 0.619 | 0.446 | 1.55E-16 | 2.6 | TEAD1     | 1.387892377 |
| COL12A14       | 6.47E-21 | 0.2000408 | 0.116 | 0.047 | 1.56E-16 | 2.6 | COL12A1   | 2.468085106 |
| CEP3502        | 7.30E-21 | 0.273955  | 0.346 | 0.213 | 1.76E-16 | 2.6 | CEP350    | 1.624413146 |
| ABHD32         | 8.45E-21 | 0.2716041 | 0.294 | 0.17  | 2.04E-16 | 2.6 | ABHD3     | 1.729411765 |
| PRKAG23        | 8.72E-21 | 0.2929359 | 0.26  | 0.146 | 2.10E-16 | 2.6 | PRKAG2    | 1.780821918 |
| NR1D22         | 1.21E-20 | 0.2807362 | 0.369 | 0.23  | 2.93E-16 | 2.6 | NR1D2     | 1.604347826 |
| RP11-486O13.43 | 1.33E-20 | 0.2657254 | 0.196 | 0.1   | 3.20E-16 | 2.6 | RP11-486O | 1.96        |
| C3orf524       | 1.48E-20 | 0.2399983 | 0.28  | 0.157 | 3.56E-16 | 2.6 | C3orf52   | 1.78343949  |
| NFE2L23        | 1.67E-20 | 0.3142722 | 0.54  | 0.374 | 4.04E-16 | 2.6 | NFE2L2    | 1.443850267 |
| CYTH13         | 1.87E-20 | 0.2394658 | 0.266 | 0.149 | 4.52E-16 | 2.6 | CYTH1     | 1.785234899 |
| MED13L3        | 1.97E-20 | 0.3388873 | 0.823 | 0.683 | 4.74E-16 | 2.6 | MED13L    | 1.204978038 |
| KCCAT2111      | 2.05E-20 | 0.263139  | 0.208 | 0.108 | 4.95E-16 | 2.6 | KCCAT211  | 1.925925926 |
| STK38L3        | 2.10E-20 | 0.2422697 | 0.32  | 0.19  | 5.06E-16 | 2.6 | STK38L    | 1.684210526 |
| EFHD15         | 2.19E-20 | 0.1166776 | 0.474 | 0.293 | 5.28E-16 | 2.6 | EFHD1     | 1.61774744  |
| FARP12         | 2.33E-20 | 0.2150966 | 0.557 | 0.373 | 5.61E-16 | 2.6 | FARP1     | 1.493297587 |
| WLS5           | 2.95E-20 | 0.2292385 | 0.296 | 0.171 | 7.10E-16 | 2.6 | WLS       | 1.730994152 |
| LINC002652     | 3.15E-20 | 0.1878074 | 0.104 | 0.041 | 7.60E-16 | 2.6 | LINC00265 | 2.536585366 |
| DHRX3          | 3.15E-20 | 0.2946015 | 0.418 | 0.272 | 7.60E-16 | 2.6 | DHRX      | 1.536764706 |
| SARAF5         | 4.41E-20 | 0.2393751 | 0.52  | 0.346 | 1.06E-15 | 2.6 | SARAF     | 1.502890173 |
| LINC009702     | 4.65E-20 | 0.2288568 | 0.091 | 0.034 | 1.12E-15 | 2.6 | LINC00970 | 2.676470588 |
| SLC41A23       | 6.60E-20 | 0.2776689 | 0.218 | 0.116 | 1.59E-15 | 2.6 | SLC41A2   | 1.879310345 |
| ISG202         | 7.07E-20 | 0.2246116 | 0.143 | 0.065 | 1.71E-15 | 2.6 | ISG20     | 2.2         |
| BTRC4          | 7.51E-20 | 0.2362505 | 0.408 | 0.258 | 1.81E-15 | 2.6 | BTRC      | 1.581395349 |
| RBM474         | 7.66E-20 | 0.3211579 | 0.776 | 0.631 | 1.85E-15 | 2.6 | RBM47     | 1.229793978 |
| IFIH11         | 7.67E-20 | 0.2682622 | 0.182 | 0.093 | 1.85E-15 | 2.6 | IFIH1     | 1.956989247 |
| PIK3CA3        | 8.63E-20 | 0.269822  | 0.434 | 0.281 | 2.08E-15 | 2.6 | PIK3CA    | 1.544483986 |
| EHF3           | 8.65E-20 | 0.1996342 | 0.658 | 0.465 | 2.09E-15 | 2.6 | EHF       | 1.415053763 |
| ZFC3H13        | 9.03E-20 | 0.2791206 | 0.396 | 0.253 | 2.18E-15 | 2.6 | ZFC3H1    | 1.565217391 |
| ACRC4          | 9.07E-20 | 0.2306457 | 0.191 | 0.097 | 2.19E-15 | 2.6 | ACRC      | 1.969072165 |

|                 |          |           |       |       |          |     |            |             |
|-----------------|----------|-----------|-------|-------|----------|-----|------------|-------------|
| FAM46A3         | 9.90E-20 | 0.223155  | 0.287 | 0.166 | 2.39E-15 | 2.6 | FAM46A     | 1.728915663 |
| OSBPL33         | 1.15E-19 | 0.2090756 | 0.37  | 0.226 | 2.78E-15 | 2.6 | OSBPL3     | 1.637168142 |
| CREBRF2         | 1.22E-19 | 0.2992256 | 0.402 | 0.26  | 2.95E-15 | 2.6 | CREBRF     | 1.546153846 |
| ZFP362          | 1.24E-19 | 0.1958746 | 0.214 | 0.114 | 2.99E-15 | 2.6 | ZFP36      | 1.877192982 |
| RP11-318C2.12   | 1.28E-19 | 0.1845697 | 0.086 | 0.032 | 3.10E-15 | 2.6 | RP11-318C  | 2.6875      |
| ZNRF23          | 1.38E-19 | 0.2394414 | 0.407 | 0.257 | 3.32E-15 | 2.6 | ZNRF2      | 1.583657588 |
| IDS3            | 1.41E-19 | 0.2147023 | 0.16  | 0.077 | 3.40E-15 | 2.6 | IDS        | 2.077922078 |
| DIRC31          | 1.61E-19 | 0.215712  | 0.066 | 0.021 | 3.89E-15 | 2.6 | DIRC3      | 3.142857143 |
| AC018816.35     | 1.63E-19 | 0.2409735 | 0.188 | 0.095 | 3.93E-15 | 2.6 | AC018816.  | 1.978947368 |
| CREB3L13        | 1.63E-19 | 0.1685894 | 0.072 | 0.024 | 3.93E-15 | 2.6 | CREB3L1    | 3           |
| SSBP33          | 1.72E-19 | 0.1869799 | 0.227 | 0.121 | 4.15E-15 | 2.6 | SSBP3      | 1.876033058 |
| WASL5           | 1.91E-19 | 0.2426944 | 0.364 | 0.226 | 4.59E-15 | 2.6 | WASL       | 1.610619469 |
| CMTM64          | 2.12E-19 | 0.2613734 | 0.45  | 0.297 | 5.12E-15 | 2.6 | CMTM6      | 1.515151515 |
| TMSB4X3         | 2.18E-19 | 0.1182312 | 0.974 | 0.935 | 5.25E-15 | 2.6 | TMSB4X     | 1.04171123  |
| RP11-290O12.22  | 2.49E-19 | 0.2822841 | 0.137 | 0.063 | 6.00E-15 | 2.6 | RP11-290O  | 2.174603175 |
| RORA3           | 2.51E-19 | 0.3516728 | 0.726 | 0.567 | 6.04E-15 | 2.6 | RORA       | 1.28042328  |
| LCOR3           | 2.56E-19 | 0.270536  | 0.406 | 0.26  | 6.18E-15 | 2.6 | LCOR       | 1.561538462 |
| ARIH14          | 2.90E-19 | 0.2838234 | 0.674 | 0.502 | 6.99E-15 | 2.6 | ARIH1      | 1.342629482 |
| SUSD64          | 3.20E-19 | 0.2590657 | 0.421 | 0.274 | 7.73E-15 | 2.6 | SUSD6      | 1.53649635  |
| AGO42           | 3.48E-19 | 0.249645  | 0.293 | 0.172 | 8.39E-15 | 2.6 | AGO4       | 1.703488372 |
| FAM188A4        | 3.64E-19 | 0.3111097 | 0.186 | 0.097 | 8.78E-15 | 2.6 | FAM188A    | 1.917525773 |
| ARAP22          | 3.67E-19 | 0.2617473 | 0.281 | 0.164 | 8.84E-15 | 2.6 | ARAP2      | 1.713414634 |
| BCL32           | 4.64E-19 | 0.2393267 | 0.19  | 0.1   | 1.12E-14 | 2.6 | BCL3       | 1.9         |
| LHFP2           | 5.32E-19 | 0.2063376 | 0.081 | 0.03  | 1.28E-14 | 2.6 | LHFP       | 2.7         |
| MBOAT12         | 5.87E-19 | 0.2891078 | 0.234 | 0.132 | 1.42E-14 | 2.6 | MBOAT1     | 1.772727273 |
| CCNI3           | 6.86E-19 | 0.2719709 | 0.776 | 0.621 | 1.65E-14 | 2.6 | CCNI       | 1.249597424 |
| PTMA2           | 6.88E-19 | 0.1738199 | 0.777 | 0.615 | 1.66E-14 | 2.6 | PTMA       | 1.263414634 |
| MARK21          | 7.76E-19 | 0.2681959 | 0.221 | 0.122 | 1.87E-14 | 2.6 | MARK2      | 1.81147541  |
| BAALC-AS12      | 8.98E-19 | 0.1690222 | 0.075 | 0.026 | 2.17E-14 | 2.6 | BAALC-AS1  | 2.884615385 |
| ABCD35          | 9.55E-19 | 0.256981  | 0.296 | 0.175 | 2.30E-14 | 2.6 | ABCD3      | 1.691428571 |
| TNFSF103        | 9.78E-19 | 0.2138598 | 0.633 | 0.466 | 2.36E-14 | 2.6 | TNFSF10    | 1.358369099 |
| UBN23           | 9.94E-19 | 0.2622767 | 0.413 | 0.269 | 2.40E-14 | 2.6 | UBN2       | 1.535315985 |
| TLE42           | 1.17E-18 | 0.2729635 | 0.498 | 0.333 | 2.82E-14 | 2.6 | TLE4       | 1.495495495 |
| EPB41L4B3       | 1.29E-18 | 0.2454356 | 0.284 | 0.166 | 3.12E-14 | 2.6 | EPB41L4B   | 1.710843373 |
| MAPK84          | 1.31E-18 | 0.2053215 | 0.486 | 0.328 | 3.16E-14 | 2.6 | MAPK8      | 1.481707317 |
| NNMT2           | 1.41E-18 | 0.2093854 | 0.197 | 0.105 | 3.39E-14 | 2.6 | NNMT       | 1.876190476 |
| CCDC1732        | 1.67E-18 | 0.2138738 | 0.14  | 0.066 | 4.03E-14 | 2.6 | CCDC173    | 2.121212121 |
| CSRNP13         | 1.75E-18 | 0.1756821 | 0.106 | 0.044 | 4.21E-14 | 2.6 | CSRNP1     | 2.409090909 |
| RP11-1038A11.32 | 1.83E-18 | 0.2048292 | 0.063 | 0.02  | 4.41E-14 | 2.6 | RP11-1038. | 3.15        |
| MARK33          | 1.86E-18 | 0.255762  | 0.637 | 0.462 | 4.48E-14 | 2.6 | MARK3      | 1.378787879 |
| TULP42          | 1.99E-18 | 0.2455578 | 0.663 | 0.494 | 4.79E-14 | 2.6 | TULP4      | 1.342105263 |
| ACTN14          | 2.08E-18 | 0.1755679 | 0.501 | 0.337 | 5.02E-14 | 2.6 | ACTN1      | 1.486646884 |
| TNFRSF12A3      | 2.21E-18 | 0.2286433 | 0.143 | 0.068 | 5.32E-14 | 2.6 | TNFRSF12A  | 2.102941176 |
| SLC11A23        | 2.34E-18 | 0.2384304 | 0.498 | 0.341 | 5.64E-14 | 2.6 | SLC11A2    | 1.460410557 |
| LAMA33          | 2.61E-18 | 0.2397084 | 0.318 | 0.189 | 6.30E-14 | 2.6 | LAMA3      | 1.682539683 |
| TSC22D13        | 2.87E-18 | 0.2301492 | 0.524 | 0.36  | 6.92E-14 | 2.6 | TSC22D1    | 1.455555556 |
| ISCU2           | 2.90E-18 | 0.1860675 | 0.128 | 0.058 | 7.00E-14 | 2.6 | ISCU       | 2.206896552 |
| IGF2R3          | 3.02E-18 | 0.2821094 | 0.306 | 0.186 | 7.28E-14 | 2.6 | IGF2R      | 1.64516129  |
| SLCO3A13        | 3.38E-18 | 0.2704455 | 0.297 | 0.181 | 8.15E-14 | 2.6 | SLCO3A1    | 1.640883978 |
| IKBKB3          | 3.39E-18 | 0.229893  | 0.274 | 0.161 | 8.16E-14 | 2.6 | IKBKB      | 1.701863354 |
| FAM177A14       | 3.85E-18 | 0.2011468 | 0.223 | 0.121 | 9.29E-14 | 2.6 | FAM177A1   | 1.842975207 |
| PTK23           | 3.91E-18 | 0.2317309 | 0.793 | 0.635 | 9.43E-14 | 2.6 | PTK2       | 1.248818898 |

|                 |          |           |       |       |          |     |            |             |
|-----------------|----------|-----------|-------|-------|----------|-----|------------|-------------|
| RP11-1105O14.12 | 4.27E-18 | 0.1111522 | 0.036 | 0.008 | 1.03E-13 | 2.6 | RP11-1105I | 4.5         |
| MGAT4A2         | 4.58E-18 | 0.2022403 | 0.174 | 0.088 | 1.10E-13 | 2.6 | MGAT4A     | 1.977272727 |
| RP11-779O18.34  | 4.73E-18 | 0.3262851 | 0.369 | 0.239 | 1.14E-13 | 2.6 | RP11-779O  | 1.543933054 |
| ZBTB433         | 4.82E-18 | 0.2032361 | 0.294 | 0.175 | 1.16E-13 | 2.6 | ZBTB43     | 1.68        |
| ZBTB23          | 5.23E-18 | 0.188574  | 0.108 | 0.046 | 1.26E-13 | 2.6 | ZBTB2      | 2.347826087 |
| KIAA15223       | 5.24E-18 | 0.2435431 | 0.356 | 0.224 | 1.26E-13 | 2.6 | KIAA1522   | 1.589285714 |
| NIPBL4          | 5.33E-18 | 0.2303716 | 0.702 | 0.542 | 1.28E-13 | 2.6 | NIPBL      | 1.295202952 |
| RALY3           | 5.68E-18 | 0.3010952 | 0.291 | 0.177 | 1.37E-13 | 2.6 | RALY       | 1.644067797 |
| QKI3            | 6.59E-18 | 0.1902254 | 0.713 | 0.533 | 1.59E-13 | 2.6 | QKI        | 1.337711069 |
| RP13-726E6.21   | 7.03E-18 | 0.2175155 | 0.139 | 0.066 | 1.69E-13 | 2.6 | RP13-726E  | 2.106060606 |
| AC013461.11     | 7.52E-18 | 0.2912387 | 0.319 | 0.199 | 1.81E-13 | 2.6 | AC013461.  | 1.603015075 |
| ITM2B5          | 8.53E-18 | 0.2968096 | 0.495 | 0.344 | 2.06E-13 | 2.6 | ITM2B      | 1.438953488 |
| MEF2A3          | 8.71E-18 | 0.205103  | 0.582 | 0.415 | 2.10E-13 | 2.6 | MEF2A      | 1.402409639 |
| ZSWIM45         | 9.32E-18 | 0.1979206 | 0.302 | 0.183 | 2.25E-13 | 2.6 | ZSWIM4     | 1.650273224 |
| SMG12           | 1.13E-17 | 0.1908065 | 0.482 | 0.321 | 2.73E-13 | 2.6 | SMG1       | 1.501557632 |
| MCF24           | 1.19E-17 | 0.1787549 | 0.068 | 0.023 | 2.87E-13 | 2.6 | MCF2       | 2.956521739 |
| SYTL43          | 1.25E-17 | 0.2579579 | 0.22  | 0.123 | 3.02E-13 | 2.6 | SYTL4      | 1.788617886 |
| HES13           | 1.36E-17 | 0.1517765 | 0.491 | 0.337 | 3.29E-13 | 2.6 | HES1       | 1.456973294 |
| CCNL13          | 1.39E-17 | 0.2213947 | 0.572 | 0.405 | 3.35E-13 | 2.6 | CCNL1      | 1.412345679 |
| LINC005981      | 1.65E-17 | 0.195169  | 0.089 | 0.036 | 3.97E-13 | 2.6 | LINC00598  | 2.472222222 |
| RP11-774D14.12  | 2.15E-17 | 0.2272933 | 0.19  | 0.102 | 5.19E-13 | 2.6 | RP11-774D  | 1.862745098 |
| PRKCE4          | 2.19E-17 | 0.2446993 | 0.31  | 0.192 | 5.29E-13 | 2.6 | PRKCE      | 1.614583333 |
| SLC30A92        | 2.23E-17 | 0.2235275 | 0.254 | 0.149 | 5.38E-13 | 2.6 | SLC30A9    | 1.704697987 |
| NOVA12          | 2.23E-17 | 0.1832382 | 0.139 | 0.066 | 5.38E-13 | 2.6 | NOVA1      | 2.106060606 |
| RAF12           | 2.33E-17 | 0.2408817 | 0.316 | 0.196 | 5.62E-13 | 2.6 | RAF1       | 1.612244898 |
| CSF12           | 2.49E-17 | 0.2103613 | 0.121 | 0.056 | 6.00E-13 | 2.6 | CSF1       | 2.160714286 |
| SLC7A15         | 2.50E-17 | 0.2263591 | 0.212 | 0.118 | 6.02E-13 | 2.6 | SLC7A1     | 1.796610169 |
| RAPH15          | 2.51E-17 | 0.2762593 | 0.479 | 0.331 | 6.04E-13 | 2.6 | RAPH1      | 1.447129909 |
| NUP1602         | 3.12E-17 | 0.2242058 | 0.232 | 0.131 | 7.51E-13 | 2.6 | NUP160     | 1.770992366 |
| RAC12           | 4.10E-17 | 0.2477761 | 0.672 | 0.504 | 9.89E-13 | 2.6 | RAC1       | 1.333333333 |
| CD635           | 4.28E-17 | 0.219988  | 0.535 | 0.376 | 1.03E-12 | 2.6 | CD63       | 1.42287234  |
| TAPBP3          | 4.83E-17 | 0.2382809 | 0.242 | 0.14  | 1.17E-12 | 2.6 | TAPBP      | 1.728571429 |
| KIF1B4          | 5.00E-17 | 0.2536131 | 0.55  | 0.399 | 1.20E-12 | 2.6 | KIF1B      | 1.378446115 |
| IST13           | 5.08E-17 | 0.3060558 | 0.467 | 0.325 | 1.22E-12 | 2.6 | IST1       | 1.436923077 |
| RNF117          | 5.48E-17 | 0.2354609 | 0.375 | 0.242 | 1.32E-12 | 2.6 | RNF11      | 1.549586777 |
| RP11-1114A5.42  | 5.67E-17 | 0.1796334 | 0.151 | 0.075 | 1.37E-12 | 2.6 | RP11-1114. | 2.013333333 |
| SMC41           | 6.38E-17 | 0.2065588 | 0.156 | 0.079 | 1.54E-12 | 2.6 | SMC4       | 1.974683544 |
| TFAP2A2         | 6.99E-17 | 0.1867722 | 0.259 | 0.151 | 1.69E-12 | 2.6 | TFAP2A     | 1.715231788 |
| YPEL23          | 7.04E-17 | 0.2662076 | 0.202 | 0.112 | 1.70E-12 | 2.6 | YPEL2      | 1.803571429 |
| TMEM63B         | 8.64E-17 | 0.1472186 | 0.071 | 0.026 | 2.08E-12 | 2.6 | TMEM63B    | 2.730769231 |
| CYFIP13         | 9.45E-17 | 0.2443284 | 0.231 | 0.135 | 2.28E-12 | 2.6 | CYFIP1     | 1.711111111 |
| DLGAP14         | 1.21E-16 | 0.1164912 | 0.323 | 0.199 | 2.92E-12 | 2.6 | DLGAP1     | 1.623115578 |
| ZHX23           | 1.24E-16 | 0.271866  | 0.477 | 0.335 | 2.98E-12 | 2.6 | ZHX2       | 1.423880597 |
| STK40           | 1.29E-16 | 0.1829488 | 0.23  | 0.13  | 3.10E-12 | 2.6 | STK40      | 1.769230769 |
| ERO1A3          | 1.35E-16 | 0.1164913 | 0.602 | 0.433 | 3.24E-12 | 2.6 | ERO1A      | 1.390300231 |
| WBP1L2          | 1.51E-16 | 0.2490405 | 0.158 | 0.082 | 3.63E-12 | 2.6 | WBP1L      | 1.926829268 |
| SMCO22          | 1.51E-16 | 0.1241855 | 0.049 | 0.015 | 3.64E-12 | 2.6 | SMCO2      | 3.266666667 |
| RBM14-RBM42     | 1.51E-16 | 0.1315792 | 0.116 | 0.052 | 3.64E-12 | 2.6 | RBM14-RB   | 2.230769231 |
| TRAF33          | 1.51E-16 | 0.2396307 | 0.21  | 0.119 | 3.64E-12 | 2.6 | TRAF3      | 1.764705882 |
| FOXA15          | 1.54E-16 | 0.2338414 | 0.207 | 0.115 | 3.72E-12 | 2.6 | FOXA1      | 1.8         |
| TMEM106A2       | 1.56E-16 | 0.1917622 | 0.12  | 0.056 | 3.76E-12 | 2.6 | TMEM106A   | 2.142857143 |
| OLA13           | 1.61E-16 | 0.2538724 | 0.467 | 0.318 | 3.89E-12 | 2.6 | OLA1       | 1.468553459 |

|                |          |           |       |       |          |     |            |             |
|----------------|----------|-----------|-------|-------|----------|-----|------------|-------------|
| MIR34AHG2      | 2.04E-16 | 0.1820708 | 0.134 | 0.064 | 4.91E-12 | 2.6 | MIR34AHG   | 2.09375     |
| PLCD33         | 2.14E-16 | 0.1007078 | 0.048 | 0.014 | 5.17E-12 | 2.6 | PLCD3      | 3.428571429 |
| HSPG23         | 2.26E-16 | 0.2092661 | 0.154 | 0.079 | 5.46E-12 | 2.6 | HSPG2      | 1.949367089 |
| GS1-114I9.33   | 2.34E-16 | 0.1860847 | 0.321 | 0.199 | 5.65E-12 | 2.6 | GS1-114I9. | 1.613065327 |
| ELF24          | 2.45E-16 | 0.2217929 | 0.54  | 0.383 | 5.91E-12 | 2.6 | ELF2       | 1.409921671 |
| DDX102         | 2.67E-16 | 0.279171  | 0.157 | 0.081 | 6.45E-12 | 2.6 | DDX10      | 1.938271605 |
| SLC39A65       | 3.03E-16 | 0.1136847 | 0.456 | 0.297 | 7.31E-12 | 2.6 | SLC39A6    | 1.535353535 |
| FOXO13         | 3.05E-16 | 0.3960803 | 0.294 | 0.189 | 7.35E-12 | 2.6 | FOXO1      | 1.555555556 |
| UMAD13         | 3.52E-16 | 0.312495  | 0.314 | 0.203 | 8.48E-12 | 2.6 | UMAD1      | 1.54679803  |
| DUSP62         | 3.91E-16 | 0.1725647 | 0.122 | 0.057 | 9.42E-12 | 2.6 | DUSP6      | 2.140350877 |
| BAG15          | 4.18E-16 | 0.2181575 | 0.179 | 0.096 | 1.01E-11 | 2.6 | BAG1       | 1.864583333 |
| FRYL3          | 4.21E-16 | 0.2187512 | 0.548 | 0.391 | 1.01E-11 | 2.6 | FRYL       | 1.401534527 |
| HDGF4          | 4.31E-16 | 0.2488279 | 0.391 | 0.262 | 1.04E-11 | 2.6 | HDGF       | 1.492366412 |
| BACH22         | 4.36E-16 | 0.2670765 | 0.474 | 0.331 | 1.05E-11 | 2.6 | BACH2      | 1.432024169 |
| FAM63B2        | 4.43E-16 | 0.2150065 | 0.305 | 0.189 | 1.07E-11 | 2.6 | FAM63B     | 1.613756614 |
| RP11-141M1.31  | 4.50E-16 | 0.2656279 | 0.174 | 0.093 | 1.08E-11 | 2.6 | RP11-141M  | 1.870967742 |
| MICALCL3       | 4.56E-16 | 0.185166  | 0.092 | 0.039 | 1.10E-11 | 2.6 | MICALCL    | 2.358974359 |
| SHC32          | 4.73E-16 | 0.1532904 | 0.041 | 0.011 | 1.14E-11 | 2.6 | SHC3       | 3.727272727 |
| ATF35          | 5.07E-16 | 0.1516195 | 0.566 | 0.4   | 1.22E-11 | 2.6 | ATF3       | 1.415       |
| PPM1K5         | 5.10E-16 | 0.2938947 | 0.245 | 0.147 | 1.23E-11 | 2.6 | PPM1K      | 1.666666667 |
| NTN13          | 6.34E-16 | 0.2452034 | 0.199 | 0.112 | 1.53E-11 | 2.6 | NTN1       | 1.776785714 |
| KIF16B4        | 6.52E-16 | 0.1861913 | 0.298 | 0.183 | 1.57E-11 | 2.6 | KIF16B     | 1.628415301 |
| TAGLN23        | 6.55E-16 | 0.1888711 | 0.337 | 0.215 | 1.58E-11 | 2.6 | TAGLN2     | 1.56744186  |
| PMAIP14        | 6.59E-16 | 0.1969485 | 0.216 | 0.123 | 1.59E-11 | 2.6 | PMAIP1     | 1.756097561 |
| GLI35          | 7.25E-16 | 0.2340182 | 0.229 | 0.133 | 1.75E-11 | 2.6 | GLI3       | 1.721804511 |
| TOX34          | 7.41E-16 | 0.2154188 | 0.277 | 0.167 | 1.79E-11 | 2.6 | TOX3       | 1.658682635 |
| CAPN84         | 7.47E-16 | 0.1549546 | 0.343 | 0.214 | 1.80E-11 | 2.6 | CAPN8      | 1.602803738 |
| MLLT63         | 7.48E-16 | 0.1677192 | 0.168 | 0.087 | 1.80E-11 | 2.6 | MLLT6      | 1.931034483 |
| FAM155A4       | 8.44E-16 | 0.3149119 | 0.119 | 0.056 | 2.04E-11 | 2.6 | FAM155A    | 2.125       |
| ZNF6383        | 9.14E-16 | 0.2212886 | 0.6   | 0.437 | 2.20E-11 | 2.6 | ZNF638     | 1.372997712 |
| S100A42        | 9.98E-16 | 0.1626138 | 0.249 | 0.148 | 2.41E-11 | 2.6 | S100A4     | 1.682432432 |
| GSPT15         | 1.08E-15 | 0.1934127 | 0.521 | 0.363 | 2.59E-11 | 2.6 | GSPT1      | 1.435261708 |
| NR2C23         | 1.16E-15 | 0.2204112 | 0.286 | 0.176 | 2.80E-11 | 2.6 | NR2C2      | 1.625       |
| RP11-371F15.34 | 1.17E-15 | 0.268367  | 0.158 | 0.084 | 2.82E-11 | 2.6 | RP11-371F  | 1.880952381 |
| MTURN3         | 1.18E-15 | 0.2023183 | 0.264 | 0.158 | 2.85E-11 | 2.6 | MTURN      | 1.670886076 |
| MAN1A14        | 1.28E-15 | 0.232824  | 0.343 | 0.224 | 3.08E-11 | 2.6 | MAN1A1     | 1.53125     |
| LPP3           | 1.30E-15 | 0.1431476 | 0.972 | 0.913 | 3.14E-11 | 2.6 | LPP        | 1.064622125 |
| EGOT3          | 1.34E-15 | 0.1853988 | 0.202 | 0.113 | 3.23E-11 | 2.6 | EGOT       | 1.787610619 |
| PCMTD13        | 1.36E-15 | 0.217247  | 0.487 | 0.336 | 3.28E-11 | 2.6 | PCMTD1     | 1.449404762 |
| MEIS12         | 1.36E-15 | 0.2078936 | 0.137 | 0.068 | 3.29E-11 | 2.6 | MEIS1      | 2.014705882 |
| EIF13          | 1.41E-15 | 0.1015895 | 0.635 | 0.474 | 3.40E-11 | 2.6 | EIF1       | 1.339662447 |
| USP125         | 1.46E-15 | 0.2570406 | 0.296 | 0.186 | 3.51E-11 | 2.6 | USP12      | 1.591397849 |
| GPCPD12        | 1.53E-15 | 0.2748682 | 0.244 | 0.148 | 3.68E-11 | 2.6 | GPCPD1     | 1.648648649 |
| ARID4B2        | 1.59E-15 | 0.2034126 | 0.715 | 0.55  | 3.84E-11 | 2.6 | ARID4B     | 1.3         |
| USP244         | 1.59E-15 | 0.2004208 | 0.271 | 0.166 | 3.85E-11 | 2.6 | USP24      | 1.63253012  |
| TACC23         | 1.72E-15 | 0.1749939 | 0.267 | 0.159 | 4.15E-11 | 2.6 | TACC2      | 1.679245283 |
| USP312         | 1.93E-15 | 0.17215   | 0.2   | 0.112 | 4.64E-11 | 2.6 | USP31      | 1.785714286 |
| LEPR2          | 2.07E-15 | 0.2165701 | 0.178 | 0.097 | 5.00E-11 | 2.6 | LEPR       | 1.835051546 |
| PER22          | 2.12E-15 | 0.2104625 | 0.236 | 0.14  | 5.12E-11 | 2.6 | PER2       | 1.685714286 |
| INTS102        | 2.21E-15 | 0.2192364 | 0.221 | 0.129 | 5.34E-11 | 2.6 | INTS10     | 1.713178295 |
| GOLM14         | 2.31E-15 | 0.1277755 | 0.363 | 0.229 | 5.57E-11 | 2.6 | GOLM1      | 1.585152838 |
| UBE2B2         | 2.36E-15 | 0.2013432 | 0.398 | 0.264 | 5.69E-11 | 2.6 | UBE2B      | 1.507575758 |

|                |          |           |       |       |          |     |           |             |
|----------------|----------|-----------|-------|-------|----------|-----|-----------|-------------|
| CCDC734        | 2.76E-15 | 0.2552052 | 0.187 | 0.104 | 6.66E-11 | 2.6 | CCDC73    | 1.798076923 |
| SHROOM34       | 2.94E-15 | 0.1454628 | 0.785 | 0.625 | 7.09E-11 | 2.6 | SHROOM3   | 1.256       |
| FAM102A2       | 3.05E-15 | 0.2139497 | 0.228 | 0.135 | 7.35E-11 | 2.6 | FAM102A   | 1.688888889 |
| STEAP42        | 3.53E-15 | 0.1198576 | 0.08  | 0.032 | 8.51E-11 | 2.6 | STEAP4    | 2.5         |
| SIRT14         | 3.68E-15 | 0.2204005 | 0.182 | 0.101 | 8.87E-11 | 2.6 | SIRT1     | 1.801980198 |
| DOCK14         | 3.74E-15 | 0.1798841 | 0.422 | 0.286 | 9.02E-11 | 2.6 | DOCK1     | 1.475524476 |
| RAB7A4         | 4.16E-15 | 0.238383  | 0.594 | 0.446 | 1.00E-10 | 2.6 | RAB7A     | 1.331838565 |
| ZNF4624        | 4.34E-15 | 0.2323145 | 0.439 | 0.303 | 1.05E-10 | 2.6 | ZNF462    | 1.448844884 |
| C1orf1322      | 4.54E-15 | 0.1739827 | 0.187 | 0.104 | 1.09E-10 | 2.6 | C1orf132  | 1.798076923 |
| ITFG14         | 4.75E-15 | 0.1945738 | 0.4   | 0.267 | 1.14E-10 | 2.6 | ITFG1     | 1.498127341 |
| METTL93        | 4.82E-15 | 0.1839285 | 0.184 | 0.101 | 1.16E-10 | 2.6 | METTL9    | 1.821782178 |
| MAP7D14        | 5.64E-15 | 0.2190739 | 0.247 | 0.149 | 1.36E-10 | 2.6 | MAP7D1    | 1.657718121 |
| WHSC13         | 6.47E-15 | 0.2031252 | 0.285 | 0.175 | 1.56E-10 | 2.6 | WHSC1     | 1.628571429 |
| NTN42          | 6.77E-15 | 0.1536075 | 0.438 | 0.295 | 1.63E-10 | 2.6 | NTN4      | 1.484745763 |
| ZNF242         | 8.47E-15 | 0.2090388 | 0.386 | 0.26  | 2.04E-10 | 2.6 | ZNF24     | 1.484615385 |
| ATF7IP4        | 8.47E-15 | 0.2450733 | 0.274 | 0.171 | 2.04E-10 | 2.6 | ATF7IP    | 1.602339181 |
| SOX92          | 8.63E-15 | 0.2353137 | 0.293 | 0.187 | 2.08E-10 | 2.6 | SOX9      | 1.56684492  |
| FHOD32         | 9.15E-15 | 0.1458378 | 0.071 | 0.028 | 2.21E-10 | 2.6 | FHOD3     | 2.535714286 |
| NRIP33         | 9.43E-15 | 0.1730429 | 0.096 | 0.042 | 2.27E-10 | 2.6 | NRIP3     | 2.285714286 |
| SRGAP2C3       | 1.02E-14 | 0.1888373 | 0.146 | 0.076 | 2.47E-10 | 2.6 | SRGAP2C   | 1.921052632 |
| ATP2B13        | 1.04E-14 | 0.2328133 | 0.166 | 0.091 | 2.51E-10 | 2.6 | ATP2B1    | 1.824175824 |
| TRPM73         | 1.19E-14 | 0.2323652 | 0.331 | 0.215 | 2.86E-10 | 2.6 | TRPM7     | 1.539534884 |
| NEDD96         | 1.20E-14 | 0.1436569 | 0.516 | 0.366 | 2.89E-10 | 2.6 | NEDD9     | 1.409836066 |
| TAP12          | 1.29E-14 | 0.1454038 | 0.092 | 0.041 | 3.11E-10 | 2.6 | TAP1      | 2.243902439 |
| CASC32         | 1.29E-14 | 0.2208053 | 0.244 | 0.148 | 3.11E-10 | 2.6 | CASC3     | 1.648648649 |
| CDK122         | 1.30E-14 | 0.2129846 | 0.2   | 0.115 | 3.13E-10 | 2.6 | CDK12     | 1.739130435 |
| CEP1923        | 1.46E-14 | 0.1899182 | 0.196 | 0.112 | 3.51E-10 | 2.6 | CEP192    | 1.75        |
| OGFRL13        | 1.59E-14 | 0.1618949 | 0.292 | 0.181 | 3.83E-10 | 2.6 | OGFRL1    | 1.613259669 |
| ARID22         | 1.75E-14 | 0.2272654 | 0.439 | 0.305 | 4.22E-10 | 2.6 | ARID2     | 1.439344262 |
| ANKRD102       | 1.80E-14 | 0.2306635 | 0.633 | 0.48  | 4.33E-10 | 2.6 | ANKRD10   | 1.31875     |
| HIST2H2BE3     | 1.84E-14 | 0.19479   | 0.19  | 0.108 | 4.43E-10 | 2.6 | HIST2H2BE | 1.759259259 |
| ANKIB12        | 1.97E-14 | 0.2089934 | 0.493 | 0.354 | 4.74E-10 | 2.6 | ANKIB1    | 1.392655367 |
| FAM53C3        | 2.12E-14 | 0.2064566 | 0.332 | 0.218 | 5.10E-10 | 2.6 | FAM53C    | 1.52293578  |
| RP11-123O10.44 | 2.39E-14 | 0.2431212 | 0.319 | 0.208 | 5.76E-10 | 2.6 | RP11-123O | 1.533653846 |
| TUFT14         | 2.40E-14 | 0.126801  | 0.288 | 0.179 | 5.78E-10 | 2.6 | TUFT1     | 1.608938547 |
| BTG31          | 2.43E-14 | 0.1960015 | 0.281 | 0.176 | 5.87E-10 | 2.6 | BTG3      | 1.596590909 |
| FOKK13         | 2.81E-14 | 0.1557744 | 0.289 | 0.179 | 6.78E-10 | 2.6 | FOKK1     | 1.61452514  |
| EPG52          | 2.96E-14 | 0.182789  | 0.186 | 0.105 | 7.14E-10 | 2.6 | EPG5      | 1.771428571 |
| PIM33          | 3.21E-14 | 0.1776116 | 0.136 | 0.07  | 7.75E-10 | 2.6 | PIM3      | 1.942857143 |
| SLC22A54       | 3.45E-14 | 0.1844807 | 0.1   | 0.046 | 8.32E-10 | 2.6 | SLC22A5   | 2.173913043 |
| SKIL2          | 4.13E-14 | 0.1739926 | 0.182 | 0.102 | 9.97E-10 | 2.6 | SKIL      | 1.784313725 |
| RGS122         | 4.36E-14 | 0.1553911 | 0.127 | 0.064 | 1.05E-09 | 2.6 | RGS12     | 1.984375    |
| ARNTL1         | 5.13E-14 | 0.1618951 | 0.121 | 0.06  | 1.24E-09 | 2.6 | ARNTL     | 2.016666667 |
| OSMR-AS13      | 5.85E-14 | 0.1947701 | 0.268 | 0.168 | 1.41E-09 | 2.6 | OSMR-AS1  | 1.595238095 |
| MT-ND23        | 6.35E-14 | 0.1487341 | 0.994 | 0.976 | 1.53E-09 | 2.6 | MT-ND2    | 1.018442623 |
| AC017101.104   | 6.37E-14 | 0.1503765 | 0.165 | 0.09  | 1.54E-09 | 2.6 | AC017101. | 1.833333333 |
| USP9X4         | 6.98E-14 | 0.2198524 | 0.545 | 0.401 | 1.68E-09 | 2.6 | USP9X     | 1.359102244 |
| MBTPS13        | 7.06E-14 | 0.2228128 | 0.191 | 0.111 | 1.70E-09 | 2.6 | MBTPS1    | 1.720720721 |
| ARHGAP323      | 7.41E-14 | 0.2144739 | 0.558 | 0.41  | 1.79E-09 | 2.6 | ARHGAP32  | 1.36097561  |
| MOCOS2         | 7.71E-14 | 0.2168931 | 0.184 | 0.105 | 1.86E-09 | 2.6 | MOCOS     | 1.752380952 |
| CST35          | 7.77E-14 | 0.1818193 | 0.127 | 0.065 | 1.87E-09 | 2.6 | CST3      | 1.953846154 |
| MPZL33         | 8.48E-14 | 0.2251139 | 0.441 | 0.31  | 2.04E-09 | 2.6 | MPZL3     | 1.422580645 |

|              |          |           |       |       |          |     |          |             |
|--------------|----------|-----------|-------|-------|----------|-----|----------|-------------|
| ERN13        | 8.70E-14 | 0.1994048 | 0.251 | 0.155 | 2.10E-09 | 2.6 | ERN1     | 1.619354839 |
| GRIP13       | 9.08E-14 | 0.2258668 | 0.288 | 0.186 | 2.19E-09 | 2.6 | GRIP1    | 1.548387097 |
| CDC42BPA3    | 9.19E-14 | 0.1731481 | 0.525 | 0.377 | 2.21E-09 | 2.6 | CDC42BPA | 1.392572944 |
| PLIN33       | 9.63E-14 | 0.178345  | 0.251 | 0.155 | 2.32E-09 | 2.6 | PLIN3    | 1.619354839 |
| TSPAN110     | 1.01E-13 | 0.1126416 | 0.343 | 0.223 | 2.45E-09 | 2.6 | TSPAN1   | 1.538116592 |
| CLASP23      | 1.36E-13 | 0.206291  | 0.391 | 0.269 | 3.29E-09 | 2.6 | CLASP2   | 1.453531599 |
| APPL22       | 1.37E-13 | 0.1760144 | 0.187 | 0.107 | 3.31E-09 | 2.6 | APPL2    | 1.747663551 |
| ITPR23       | 1.42E-13 | 0.1010358 | 0.627 | 0.468 | 3.42E-09 | 2.6 | ITPR2    | 1.33974359  |
| S100A104     | 1.46E-13 | 0.1180712 | 0.523 | 0.381 | 3.52E-09 | 2.6 | S100A10  | 1.372703412 |
| RBBP63       | 1.54E-13 | 0.1727161 | 0.407 | 0.277 | 3.71E-09 | 2.6 | RBBP6    | 1.469314079 |
| MYRFL2       | 1.55E-13 | 0.2047544 | 0.136 | 0.071 | 3.75E-09 | 2.6 | MYRFL    | 1.915492958 |
| NUTM2B-AS12  | 1.65E-13 | 0.2002103 | 0.448 | 0.317 | 3.97E-09 | 2.6 | NUTM2B-A | 1.413249211 |
| CDKN1A3      | 1.69E-13 | 0.15793   | 0.125 | 0.063 | 4.08E-09 | 2.6 | CDKN1A   | 1.984126984 |
| LIF3         | 1.72E-13 | 0.130706  | 0.053 | 0.019 | 4.15E-09 | 2.6 | LIF      | 2.789473684 |
| HINT32       | 1.75E-13 | 0.1555325 | 0.123 | 0.063 | 4.23E-09 | 2.6 | HINT3    | 1.952380952 |
| ADORA2A-AS12 | 1.80E-13 | 0.1159381 | 0.048 | 0.016 | 4.34E-09 | 2.6 | ADORA2A- | 3           |
| KLHL182      | 1.85E-13 | 0.1594911 | 0.146 | 0.078 | 4.47E-09 | 2.6 | KLHL18   | 1.871794872 |
| SIPA1L14     | 1.86E-13 | 0.1836976 | 0.523 | 0.379 | 4.48E-09 | 2.6 | SIPA1L1  | 1.37994723  |
| BPTF4        | 1.86E-13 | 0.193771  | 0.466 | 0.331 | 4.48E-09 | 2.6 | BPTF     | 1.407854985 |
| KAT6B4       | 1.87E-13 | 0.2305355 | 0.37  | 0.253 | 4.50E-09 | 2.6 | KAT6B    | 1.462450593 |
| AHI12        | 1.92E-13 | 0.1875587 | 0.38  | 0.258 | 4.63E-09 | 2.6 | AHI1     | 1.472868217 |
| SLC17A83     | 1.95E-13 | 0.1360346 | 0.049 | 0.017 | 4.69E-09 | 2.6 | SLC17A8  | 2.882352941 |
| LRP102       | 1.97E-13 | 0.1618727 | 0.222 | 0.133 | 4.75E-09 | 2.6 | LRP10    | 1.669172932 |
| VEGFC2       | 1.98E-13 | 0.1291312 | 0.114 | 0.056 | 4.77E-09 | 2.6 | VEGFC    | 2.035714286 |
| SMURF13      | 1.98E-13 | 0.1515406 | 0.509 | 0.361 | 4.77E-09 | 2.6 | SMURF1   | 1.409972299 |
| HIVEP14      | 2.07E-13 | 0.2060676 | 0.293 | 0.189 | 4.98E-09 | 2.6 | HIVEP1   | 1.55026455  |
| TLR23        | 2.32E-13 | 0.1879908 | 0.264 | 0.166 | 5.60E-09 | 2.6 | TLR2     | 1.590361446 |
| ZCCHC72      | 2.47E-13 | 0.1874327 | 0.567 | 0.418 | 5.95E-09 | 2.6 | ZCCHC7   | 1.35645933  |
| ATP9A2       | 2.47E-13 | 0.1736126 | 0.181 | 0.104 | 5.96E-09 | 2.6 | ATP9A    | 1.740384615 |
| SMAD24       | 2.54E-13 | 0.2158138 | 0.424 | 0.299 | 6.13E-09 | 2.6 | SMAD2    | 1.418060201 |
| XIAP2        | 2.54E-13 | 0.1920065 | 0.221 | 0.134 | 6.13E-09 | 2.6 | XIAP     | 1.649253731 |
| COL28A12     | 2.59E-13 | 0.1510071 | 0.079 | 0.034 | 6.24E-09 | 2.6 | COL28A1  | 2.323529412 |
| ZDHHC143     | 2.81E-13 | 0.2356937 | 0.197 | 0.117 | 6.77E-09 | 2.6 | ZDHHC14  | 1.683760684 |
| MAATS11      | 2.83E-13 | 0.1191936 | 0.046 | 0.015 | 6.81E-09 | 2.6 | MAATS1   | 3.066666667 |
| DDX62        | 2.91E-13 | 0.20036   | 0.382 | 0.261 | 7.02E-09 | 2.6 | DDX6     | 1.463601533 |
| TCF7L23      | 2.93E-13 | 0.1966744 | 0.522 | 0.377 | 7.06E-09 | 2.6 | TCF7L2   | 1.384615385 |
| TRIM293      | 3.12E-13 | 0.1604007 | 0.11  | 0.054 | 7.52E-09 | 2.6 | TRIM29   | 2.037037037 |
| FRY1         | 3.35E-13 | 0.2460064 | 0.175 | 0.1   | 8.07E-09 | 2.6 | FRY      | 1.75        |
| KLF103       | 3.57E-13 | 0.2024032 | 0.228 | 0.14  | 8.62E-09 | 2.6 | KLF10    | 1.628571429 |
| NFKBIB2      | 3.73E-13 | 0.1601439 | 0.081 | 0.036 | 9.00E-09 | 2.6 | NFKBIB   | 2.25        |
| WDR203       | 3.95E-13 | 0.1536281 | 0.191 | 0.11  | 9.52E-09 | 2.6 | WDR20    | 1.736363636 |
| SESN13       | 4.34E-13 | 0.2543226 | 0.197 | 0.118 | 1.05E-08 | 2.6 | SESN1    | 1.669491525 |
| ZC3H7B1      | 4.35E-13 | 0.1562046 | 0.117 | 0.059 | 1.05E-08 | 2.6 | ZC3H7B   | 1.983050847 |
| SMAD52       | 4.42E-13 | 0.1731183 | 0.201 | 0.118 | 1.07E-08 | 2.6 | SMAD5    | 1.703389831 |
| BCKDHB2      | 4.50E-13 | 0.1782815 | 0.198 | 0.116 | 1.08E-08 | 2.6 | BCKDHB   | 1.706896552 |
| NR4A33       | 4.68E-13 | 0.1421905 | 0.053 | 0.019 | 1.13E-08 | 2.6 | NR4A3    | 2.789473684 |
| AMOTL21      | 4.74E-13 | 0.161553  | 0.126 | 0.065 | 1.14E-08 | 2.6 | AMOTL2   | 1.938461538 |
| MTCL14       | 4.79E-13 | 0.113879  | 0.109 | 0.053 | 1.16E-08 | 2.6 | MTCL1    | 2.056603774 |
| TYMP3        | 5.00E-13 | 0.1255848 | 0.078 | 0.034 | 1.21E-08 | 2.6 | TYMP     | 2.294117647 |
| APLP25       | 5.27E-13 | 0.1543318 | 0.402 | 0.273 | 1.27E-08 | 2.6 | APLP2    | 1.472527473 |
| ZC3H12A2     | 5.50E-13 | 0.1622321 | 0.127 | 0.066 | 1.33E-08 | 2.6 | ZC3H12A  | 1.924242424 |
| ATP8B13      | 5.70E-13 | 0.1863881 | 0.533 | 0.4   | 1.38E-08 | 2.6 | ATP8B1   | 1.3325      |

|                |          |           |       |       |          |     |            |             |
|----------------|----------|-----------|-------|-------|----------|-----|------------|-------------|
| RP11-350J20.52 | 5.75E-13 | 0.1199728 | 0.068 | 0.027 | 1.39E-08 | 2.6 | RP11-350J2 | 2.518518519 |
| TMBIM13        | 6.04E-13 | 0.1642569 | 0.22  | 0.133 | 1.46E-08 | 2.6 | TMBIM1     | 1.654135338 |
| PPP2R3C2       | 6.10E-13 | 0.1791953 | 0.183 | 0.106 | 1.47E-08 | 2.6 | PPP2R3C    | 1.726415094 |
| CDSN2          | 6.33E-13 | 0.1092552 | 0.055 | 0.021 | 1.53E-08 | 2.6 | CDSN       | 2.619047619 |
| NDUF63         | 6.43E-13 | 0.2224638 | 0.175 | 0.1   | 1.55E-08 | 2.6 | NDUF63     | 1.75        |
| DHX322         | 7.03E-13 | 0.175697  | 0.42  | 0.293 | 1.70E-08 | 2.6 | DHX32      | 1.433447099 |
| TBL1X2         | 7.96E-13 | 0.180904  | 0.323 | 0.213 | 1.92E-08 | 2.6 | TBL1X      | 1.516431925 |
| ZFAND55        | 8.16E-13 | 0.2217876 | 0.564 | 0.43  | 1.97E-08 | 2.6 | ZFAND5     | 1.311627907 |
| EP3004         | 8.79E-13 | 0.1684476 | 0.328 | 0.216 | 2.12E-08 | 2.6 | EP300      | 1.518518519 |
| AGAP33         | 8.98E-13 | 0.1373692 | 0.11  | 0.054 | 2.17E-08 | 2.6 | AGAP3      | 2.037037037 |
| CKAP42         | 9.29E-13 | 0.1696205 | 0.308 | 0.203 | 2.24E-08 | 2.6 | CKAP4      | 1.517241379 |
| ZSWIM64        | 9.39E-13 | 0.1294331 | 0.652 | 0.492 | 2.26E-08 | 2.6 | ZSWIM6     | 1.325203252 |
| ANKRD174       | 9.46E-13 | 0.1987463 | 0.657 | 0.503 | 2.28E-08 | 2.6 | ANKRD17    | 1.306163022 |
| CGN2           | 1.01E-12 | 0.1857486 | 0.155 | 0.087 | 2.44E-08 | 2.6 | CGN        | 1.781609195 |
| SCNN1A2        | 1.05E-12 | 0.1878807 | 0.197 | 0.118 | 2.54E-08 | 2.6 | SCNN1A     | 1.669491525 |
| STAG13         | 1.13E-12 | 0.1673509 | 0.659 | 0.506 | 2.72E-08 | 2.6 | STAG1      | 1.302371542 |
| PCF113         | 1.13E-12 | 0.1851277 | 0.202 | 0.122 | 2.74E-08 | 2.6 | PCF11      | 1.655737705 |
| TP53INP22      | 1.16E-12 | 0.1434316 | 0.097 | 0.046 | 2.79E-08 | 2.6 | TP53INP2   | 2.108695652 |
| FILIP1L4       | 1.18E-12 | 0.167818  | 0.189 | 0.11  | 2.85E-08 | 2.6 | FILIP1L    | 1.718181818 |
| C2CD4A5        | 1.24E-12 | 0.1890101 | 0.098 | 0.047 | 2.99E-08 | 2.6 | C2CD4A     | 2.085106383 |
| ZBTB444        | 1.26E-12 | 0.1956107 | 0.227 | 0.139 | 3.05E-08 | 2.6 | ZBTB44     | 1.633093525 |
| MPRIP3         | 1.29E-12 | 0.1795041 | 0.375 | 0.257 | 3.10E-08 | 2.6 | MPRIP      | 1.459143969 |
| CFAP694        | 1.36E-12 | 0.1368152 | 0.18  | 0.103 | 3.29E-08 | 2.6 | CFAP69     | 1.747572816 |
| SSBP24         | 1.38E-12 | 0.1682176 | 0.585 | 0.431 | 3.33E-08 | 2.6 | SSBP2      | 1.357308585 |
| HNRNPM4        | 1.42E-12 | 0.1723043 | 0.378 | 0.258 | 3.44E-08 | 2.6 | HNRNPM     | 1.465116279 |
| UNK3           | 1.54E-12 | 0.1175448 | 0.105 | 0.051 | 3.70E-08 | 2.6 | UNK        | 2.058823529 |
| LAMP15         | 1.60E-12 | 0.1749451 | 0.166 | 0.095 | 3.85E-08 | 2.6 | LAMP1      | 1.747368421 |
| PRKCH2         | 1.60E-12 | 0.1644013 | 0.346 | 0.236 | 3.86E-08 | 2.6 | PRKCH      | 1.466101695 |
| NDFIP12        | 1.89E-12 | 0.2108898 | 0.29  | 0.191 | 4.55E-08 | 2.6 | NDFIP1     | 1.518324607 |
| LIMD12         | 1.99E-12 | 0.1250452 | 0.136 | 0.072 | 4.80E-08 | 2.6 | LIMD1      | 1.888888889 |
| WNK14          | 2.07E-12 | 0.1710166 | 0.35  | 0.238 | 4.99E-08 | 2.6 | WNK1       | 1.470588235 |
| ITPKC2         | 2.12E-12 | 0.1581337 | 0.191 | 0.114 | 5.11E-08 | 2.6 | ITPKC      | 1.675438596 |
| CCDC1481       | 2.15E-12 | 0.1477558 | 0.098 | 0.047 | 5.19E-08 | 2.6 | CCDC148    | 2.085106383 |
| ZFP36L12       | 2.42E-12 | 0.1623221 | 0.735 | 0.587 | 5.84E-08 | 2.6 | ZFP36L1    | 1.252129472 |
| DOCK92         | 2.69E-12 | 0.1692718 | 0.324 | 0.217 | 6.48E-08 | 2.6 | DOCK9      | 1.493087558 |
| BRE3           | 2.72E-12 | 0.2341055 | 0.303 | 0.205 | 6.56E-08 | 2.6 | BRE        | 1.47804878  |
| PPP3CA5        | 2.90E-12 | 0.1621862 | 0.711 | 0.558 | 6.99E-08 | 2.6 | PPP3CA     | 1.274193548 |
| PDZD85         | 2.90E-12 | 0.1521352 | 0.34  | 0.228 | 7.00E-08 | 2.6 | PDZD8      | 1.49122807  |
| RP11-834C11.41 | 2.94E-12 | 0.114539  | 0.077 | 0.034 | 7.09E-08 | 2.6 | RP11-834C  | 2.264705882 |
| SRPK13         | 3.17E-12 | 0.1603844 | 0.624 | 0.481 | 7.65E-08 | 2.6 | SRPK1      | 1.297297297 |
| PEA152         | 3.55E-12 | 0.2224769 | 0.29  | 0.193 | 8.56E-08 | 2.6 | PEA15      | 1.502590674 |
| DLG14          | 3.57E-12 | 0.2054156 | 0.632 | 0.501 | 8.61E-08 | 2.6 | DLG1       | 1.261477046 |
| KIAA03682      | 3.62E-12 | 0.2039232 | 0.353 | 0.241 | 8.74E-08 | 2.6 | KIAA0368   | 1.46473029  |
| RAD182         | 3.72E-12 | 0.191411  | 0.137 | 0.075 | 8.96E-08 | 2.6 | RAD18      | 1.826666667 |
| PSEN12         | 4.14E-12 | 0.1745652 | 0.341 | 0.229 | 9.99E-08 | 2.6 | PSEN1      | 1.489082969 |
| HMGCS12        | 4.18E-12 | 0.1626749 | 0.351 | 0.236 | 1.01E-07 | 2.6 | HMGCS1     | 1.487288136 |
| SRPX22         | 4.56E-12 | 0.1352886 | 0.134 | 0.072 | 1.10E-07 | 2.6 | SRPX2      | 1.861111111 |
| PSPC13         | 4.81E-12 | 0.1597612 | 0.29  | 0.188 | 1.16E-07 | 2.6 | PSPC1      | 1.542553191 |
| MAP2K13        | 4.83E-12 | 0.1593592 | 0.365 | 0.249 | 1.16E-07 | 2.6 | MAP2K1     | 1.465863454 |
| DMXL13         | 5.51E-12 | 0.152572  | 0.257 | 0.164 | 1.33E-07 | 2.6 | DMXL1      | 1.567073171 |
| AC026188.11    | 5.53E-12 | 0.2211052 | 0.068 | 0.029 | 1.33E-07 | 2.6 | AC026188.  | 2.344827586 |
| GM2A2          | 5.76E-12 | 0.1585809 | 0.082 | 0.038 | 1.39E-07 | 2.6 | GM2A       | 2.157894737 |



|               |          |           |       |       |          |     |           |             |
|---------------|----------|-----------|-------|-------|----------|-----|-----------|-------------|
| CUL12         | 5.78E-12 | 0.1949509 | 0.197 | 0.12  | 1.39E-07 | 2.6 | CUL1      | 1.641666667 |
| SUSD13        | 5.79E-12 | 0.1906405 | 0.172 | 0.1   | 1.40E-07 | 2.6 | SUSD1     | 1.72        |
| SLC37A12      | 5.81E-12 | 0.1632304 | 0.148 | 0.083 | 1.40E-07 | 2.6 | SLC37A1   | 1.78313253  |
| UBL5          | 5.88E-12 | 0.1675836 | 0.645 | 0.504 | 1.42E-07 | 2.6 | UBL5      | 1.279761905 |
| KDM2A3        | 5.92E-12 | 0.1720506 | 0.577 | 0.431 | 1.43E-07 | 2.6 | KDM2A     | 1.3387471   |
| GOLPH33       | 6.06E-12 | 0.1529484 | 0.379 | 0.259 | 1.46E-07 | 2.6 | GOLPH3    | 1.463320463 |
| DLG54         | 6.07E-12 | 0.1746074 | 0.371 | 0.259 | 1.46E-07 | 2.6 | DLG5      | 1.432432432 |
| QSER12        | 6.80E-12 | 0.1515593 | 0.245 | 0.154 | 1.64E-07 | 2.6 | QSER1     | 1.590909091 |
| MAPK64        | 6.88E-12 | 0.1641184 | 0.387 | 0.269 | 1.66E-07 | 2.6 | MAPK6     | 1.43866171  |
| OTUD7B4       | 7.06E-12 | 0.1209876 | 0.42  | 0.29  | 1.70E-07 | 2.6 | OTUD7B    | 1.448275862 |
| ZNF2642       | 7.11E-12 | 0.123604  | 0.137 | 0.074 | 1.71E-07 | 2.6 | ZNF264    | 1.851351351 |
| SGPP23        | 7.51E-12 | 0.1953211 | 0.181 | 0.108 | 1.81E-07 | 2.6 | SGPP2     | 1.675925926 |
| FCHO22        | 7.79E-12 | 0.1806505 | 0.264 | 0.171 | 1.88E-07 | 2.6 | FCHO2     | 1.543859649 |
| MOCS12        | 8.17E-12 | 0.10224   | 0.052 | 0.02  | 1.97E-07 | 2.6 | MOCS1     | 2.6         |
| RP11-83A24.25 | 8.63E-12 | 0.1649837 | 0.211 | 0.129 | 2.08E-07 | 2.6 | RP11-83A2 | 1.635658915 |
| APLF3         | 9.28E-12 | 0.1766163 | 0.177 | 0.104 | 2.24E-07 | 2.6 | APLF      | 1.701923077 |
| AP1S33        | 9.35E-12 | 0.1418173 | 0.199 | 0.12  | 2.25E-07 | 2.6 | AP1S3     | 1.658333333 |
| N4BP2L12      | 1.05E-11 | 0.1725459 | 0.181 | 0.107 | 2.53E-07 | 2.6 | N4BP2L1   | 1.691588785 |
| PTP4A13       | 1.07E-11 | 0.1918552 | 0.394 | 0.281 | 2.59E-07 | 2.6 | PTP4A1    | 1.402135231 |
| KMT2E4        | 1.09E-11 | 0.1564413 | 0.593 | 0.461 | 2.63E-07 | 2.6 | KMT2E     | 1.286334056 |
| ZMAT31        | 1.09E-11 | 0.1668296 | 0.107 | 0.055 | 2.64E-07 | 2.6 | ZMAT3     | 1.945454545 |
| ST71          | 1.12E-11 | 0.1774411 | 0.233 | 0.147 | 2.70E-07 | 2.6 | ST7       | 1.585034014 |
| AK33          | 1.23E-11 | 0.159117  | 0.306 | 0.204 | 2.96E-07 | 2.6 | AK3       | 1.5         |
| ZNF4402       | 1.26E-11 | 0.120897  | 0.097 | 0.047 | 3.05E-07 | 2.6 | ZNF440    | 2.063829787 |
| VAMP83        | 1.27E-11 | 0.1511297 | 0.856 | 0.756 | 3.06E-07 | 2.6 | VAMP8     | 1.132275132 |
| EPB41L4A2     | 1.33E-11 | 0.1415305 | 0.25  | 0.158 | 3.20E-07 | 2.6 | EPB41L4A  | 1.582278481 |
| RASD12        | 1.43E-11 | 0.1177528 | 0.108 | 0.055 | 3.45E-07 | 2.6 | RASD1     | 1.963636364 |
| KLHL424       | 1.49E-11 | 0.1533876 | 0.131 | 0.071 | 3.60E-07 | 2.6 | KLHL42    | 1.845070423 |
| RHBDD13       | 1.49E-11 | 0.208535  | 0.217 | 0.137 | 3.60E-07 | 2.6 | RHBDD1    | 1.583941606 |
| UBE2Z1        | 1.61E-11 | 0.16948   | 0.306 | 0.206 | 3.88E-07 | 2.6 | UBE2Z     | 1.485436893 |
| NBPF122       | 1.71E-11 | 0.162596  | 0.15  | 0.086 | 4.13E-07 | 2.6 | NBPF12    | 1.744186047 |
| AVL94         | 1.77E-11 | 0.1772876 | 0.295 | 0.198 | 4.27E-07 | 2.6 | AVL9      | 1.48989899  |
| TMTC24        | 1.77E-11 | 0.1882927 | 0.504 | 0.373 | 4.27E-07 | 2.6 | TMTC2     | 1.351206434 |
| PRKAR2A4      | 1.83E-11 | 0.2334443 | 0.253 | 0.164 | 4.41E-07 | 2.6 | PRKAR2A   | 1.542682927 |
| ARHGAP53      | 1.88E-11 | 0.1663036 | 0.53  | 0.395 | 4.52E-07 | 2.6 | ARHGAP5   | 1.341772152 |
| UHRF1BP1L2    | 1.95E-11 | 0.1691957 | 0.301 | 0.202 | 4.70E-07 | 2.6 | UHRF1BP1  | 1.49009901  |
| RHEB3         | 1.97E-11 | 0.1172568 | 0.376 | 0.259 | 4.74E-07 | 2.6 | RHEB      | 1.451737452 |
| FAM222A-AS13  | 1.98E-11 | 0.1083989 | 0.069 | 0.03  | 4.78E-07 | 2.6 | FAM222A-  | 2.3         |
| TLE31         | 2.09E-11 | 0.129051  | 0.072 | 0.032 | 5.03E-07 | 2.6 | TLE3      | 2.25        |
| YME1L13       | 2.13E-11 | 0.2073762 | 0.376 | 0.266 | 5.12E-07 | 2.6 | YME1L1    | 1.413533835 |
| PIAS13        | 2.14E-11 | 0.1721287 | 0.627 | 0.48  | 5.16E-07 | 2.6 | PIAS1     | 1.30625     |
| GRIN2A2       | 2.15E-11 | 0.1349843 | 0.102 | 0.051 | 5.18E-07 | 2.6 | GRIN2A    | 2           |
| BZW13         | 2.15E-11 | 0.157972  | 0.392 | 0.273 | 5.19E-07 | 2.6 | BZW1      | 1.435897436 |
| RFK3          | 2.17E-11 | 0.1355455 | 0.092 | 0.045 | 5.24E-07 | 2.6 | RFK       | 2.044444444 |
| WDR193        | 2.20E-11 | 0.1604876 | 0.171 | 0.101 | 5.30E-07 | 2.6 | WDR19     | 1.693069307 |
| PINK13        | 2.34E-11 | 0.1277776 | 0.114 | 0.06  | 5.63E-07 | 2.6 | PINK1     | 1.9         |
| CD243         | 2.41E-11 | 0.1148379 | 0.708 | 0.575 | 5.81E-07 | 2.6 | CD24      | 1.231304348 |
| MED134        | 2.47E-11 | 0.1437587 | 0.528 | 0.394 | 5.96E-07 | 2.6 | MED13     | 1.340101523 |
| PGAP12        | 2.52E-11 | 0.1675094 | 0.139 | 0.078 | 6.07E-07 | 2.6 | PGAP1     | 1.782051282 |
| IFT571        | 2.62E-11 | 0.233155  | 0.217 | 0.138 | 6.33E-07 | 2.6 | IFT57     | 1.572463768 |
| HNRNPUL11     | 2.84E-11 | 0.1932835 | 0.194 | 0.119 | 6.85E-07 | 2.6 | HNRNPUL1  | 1.630252101 |
| APOL63        | 2.91E-11 | 0.2082835 | 0.188 | 0.116 | 7.02E-07 | 2.6 | APOL6     | 1.620689655 |

|                |          |           |       |       |          |     |           |             |
|----------------|----------|-----------|-------|-------|----------|-----|-----------|-------------|
| AVIL4          | 3.11E-11 | 0.1694942 | 0.113 | 0.06  | 7.49E-07 | 2.6 | AVIL      | 1.883333333 |
| INTS64         | 3.28E-11 | 0.1297903 | 0.396 | 0.278 | 7.91E-07 | 2.6 | INTS6     | 1.424460432 |
| RP11-382A20.34 | 3.36E-11 | 0.1577998 | 0.188 | 0.113 | 8.11E-07 | 2.6 | RP11-382A | 1.663716814 |
| HLA-C2         | 3.36E-11 | 0.1567077 | 0.43  | 0.309 | 8.11E-07 | 2.6 | HLA-C     | 1.391585761 |
| EXOC23         | 3.38E-11 | 0.1586988 | 0.218 | 0.137 | 8.16E-07 | 2.6 | EXOC2     | 1.591240876 |
| PPP1R212       | 3.51E-11 | 0.1385124 | 0.19  | 0.115 | 8.45E-07 | 2.6 | PPP1R21   | 1.652173913 |
| PPP6R33        | 3.78E-11 | 0.1550191 | 0.639 | 0.503 | 9.11E-07 | 2.6 | PPP6R3    | 1.270377734 |
| ANXA62         | 3.97E-11 | 0.1478294 | 0.169 | 0.099 | 9.56E-07 | 2.6 | ANXA6     | 1.707070707 |
| GBF11          | 4.16E-11 | 0.1591091 | 0.325 | 0.222 | 1.00E-06 | 2.6 | GBF1      | 1.463963964 |
| SBNO13         | 4.30E-11 | 0.1587139 | 0.233 | 0.149 | 1.04E-06 | 2.6 | SBNO1     | 1.563758389 |
| MICU22         | 4.95E-11 | 0.1866764 | 0.255 | 0.168 | 1.19E-06 | 2.6 | MICU2     | 1.517857143 |
| CCSER12        | 4.98E-11 | 0.1858364 | 0.563 | 0.437 | 1.20E-06 | 2.6 | CCSER1    | 1.288329519 |
| PMEPA13        | 5.11E-11 | 0.142083  | 0.112 | 0.059 | 1.23E-06 | 2.6 | PMEPA1    | 1.898305085 |
| CTSB3          | 5.17E-11 | 0.1122481 | 0.403 | 0.287 | 1.25E-06 | 2.6 | CTSB      | 1.404181185 |
| MIR181A2HG4    | 5.25E-11 | 0.1556521 | 0.147 | 0.084 | 1.27E-06 | 2.6 | MIR181A2H | 1.75        |
| BCL2L17        | 5.42E-11 | 0.1510259 | 0.246 | 0.159 | 1.31E-06 | 2.6 | BCL2L1    | 1.547169811 |
| OST44          | 5.51E-11 | 0.1803117 | 0.548 | 0.41  | 1.33E-06 | 2.6 | OST4      | 1.336585366 |
| TMEM2172       | 5.88E-11 | 0.1652667 | 0.116 | 0.062 | 1.42E-06 | 2.6 | TMEM217   | 1.870967742 |
| KDM6B          | 5.97E-11 | 0.1176407 | 0.054 | 0.022 | 1.44E-06 | 2.6 | KDM6B     | 2.454545455 |
| PPARA4         | 5.98E-11 | 0.1586389 | 0.141 | 0.08  | 1.44E-06 | 2.6 | PPARA     | 1.7625      |
| ATP5E5         | 6.04E-11 | 0.1063338 | 0.7   | 0.55  | 1.46E-06 | 2.6 | ATP5E     | 1.272727273 |
| ZNF6752        | 6.21E-11 | 0.1768392 | 0.172 | 0.103 | 1.50E-06 | 2.6 | ZNF675    | 1.669902913 |
| RP11-65M17.32  | 6.29E-11 | 0.1136495 | 0.054 | 0.022 | 1.52E-06 | 2.6 | RP11-65M1 | 2.454545455 |
| SCAF83         | 6.43E-11 | 0.1326969 | 0.344 | 0.238 | 1.55E-06 | 2.6 | SCAF8     | 1.445378151 |
| FBXL72         | 6.64E-11 | 0.1107214 | 0.077 | 0.036 | 1.60E-06 | 2.6 | FBXL7     | 2.138888889 |
| DNAJC113       | 6.88E-11 | 0.1808217 | 0.366 | 0.259 | 1.66E-06 | 2.6 | DNAJC1    | 1.413127413 |
| SLC9A72        | 7.06E-11 | 0.1446728 | 0.395 | 0.278 | 1.70E-06 | 2.6 | SLC9A7    | 1.420863309 |
| SLC44A51       | 7.27E-11 | 0.1089072 | 0.057 | 0.023 | 1.75E-06 | 2.6 | SLC44A5   | 2.47826087  |
| TMEM106B2      | 7.45E-11 | 0.1591011 | 0.234 | 0.149 | 1.80E-06 | 2.6 | TMEM106B  | 1.570469799 |
| LMNA3          | 7.57E-11 | 0.154938  | 0.33  | 0.229 | 1.83E-06 | 2.6 | LMNA      | 1.441048035 |
| RP11-624L4.13  | 7.97E-11 | 0.1267217 | 0.116 | 0.062 | 1.92E-06 | 2.6 | RP11-624L | 1.870967742 |
| GJB33          | 8.39E-11 | 0.1152069 | 0.071 | 0.032 | 2.02E-06 | 2.6 | GJB3      | 2.21875     |
| PHC22          | 8.69E-11 | 0.1595573 | 0.179 | 0.109 | 2.10E-06 | 2.6 | PHC2      | 1.642201835 |
| RANGAP12       | 8.86E-11 | 0.1226328 | 0.101 | 0.052 | 2.14E-06 | 2.6 | RANGAP1   | 1.942307692 |
| MIB14          | 9.15E-11 | 0.1862137 | 0.511 | 0.379 | 2.21E-06 | 2.6 | MIB1      | 1.34828496  |
| LNX24          | 9.45E-11 | 0.1108599 | 0.229 | 0.145 | 2.28E-06 | 2.6 | LNX2      | 1.579310345 |
| USP323         | 9.48E-11 | 0.1563441 | 0.331 | 0.228 | 2.29E-06 | 2.6 | USP32     | 1.451754386 |
| DYNLRB14       | 9.51E-11 | 0.1517711 | 0.433 | 0.308 | 2.29E-06 | 2.6 | DYNLRB1   | 1.405844156 |
| SLC9A13        | 9.78E-11 | 0.1336194 | 0.195 | 0.12  | 2.36E-06 | 2.6 | SLC9A1    | 1.625       |
| EHD23          | 9.87E-11 | 0.1084915 | 0.108 | 0.056 | 2.38E-06 | 2.6 | EHD2      | 1.928571429 |
| CUL34          | 1.01E-10 | 0.1618806 | 0.526 | 0.399 | 2.43E-06 | 2.6 | CUL3      | 1.318295739 |
| NRF12          | 1.03E-10 | 0.1442429 | 0.259 | 0.168 | 2.48E-06 | 2.6 | NRF1      | 1.541666667 |
| ANO103         | 1.03E-10 | 0.2171605 | 0.378 | 0.27  | 2.49E-06 | 2.6 | ANO10     | 1.4         |
| IBTK4          | 1.06E-10 | 0.1363418 | 0.321 | 0.218 | 2.54E-06 | 2.6 | IBTK      | 1.472477064 |
| FOSB2          | 1.09E-10 | 0.1177483 | 0.525 | 0.39  | 2.62E-06 | 2.6 | FOSB      | 1.346153846 |
| CTD-2060L22.12 | 1.09E-10 | 0.154467  | 0.052 | 0.021 | 2.62E-06 | 2.6 | CTD-2060L | 2.476190476 |
| SEMA4B1        | 1.18E-10 | 0.1006529 | 0.326 | 0.22  | 2.84E-06 | 2.6 | SEMA4B    | 1.481818182 |
| JUND5          | 1.18E-10 | 0.1504032 | 0.259 | 0.171 | 2.85E-06 | 2.6 | JUND      | 1.514619883 |
| PHIP3          | 1.31E-10 | 0.2020777 | 0.565 | 0.436 | 3.17E-06 | 2.6 | PHIP      | 1.29587156  |
| NPLOC42        | 1.33E-10 | 0.1307507 | 0.234 | 0.151 | 3.20E-06 | 2.6 | NPLOC4    | 1.549668874 |
| DIAPH13        | 1.34E-10 | 0.1256999 | 0.414 | 0.293 | 3.23E-06 | 2.6 | DIAPH1    | 1.412969283 |
| TMEM595        | 1.34E-10 | 0.1886903 | 0.579 | 0.448 | 3.23E-06 | 2.6 | TMEM59    | 1.292410714 |

|                |          |           |       |       |          |     |           |             |
|----------------|----------|-----------|-------|-------|----------|-----|-----------|-------------|
| C3orf351       | 1.34E-10 | 0.1182283 | 0.11  | 0.058 | 3.24E-06 | 2.6 | C3orf35   | 1.896551724 |
| TNRC6C2        | 1.39E-10 | 0.1316505 | 0.084 | 0.041 | 3.36E-06 | 2.6 | TNRC6C    | 2.048780488 |
| SBF23          | 1.43E-10 | 0.168219  | 0.756 | 0.633 | 3.45E-06 | 2.6 | SBF2      | 1.194312796 |
| SLC35F2        | 1.49E-10 | 0.1732151 | 0.104 | 0.054 | 3.59E-06 | 2.6 | SLC35F2   | 1.925925926 |
| VPS13A2        | 1.54E-10 | 0.1833124 | 0.231 | 0.151 | 3.71E-06 | 2.6 | VPS13A    | 1.529801325 |
| ADAM103        | 1.68E-10 | 0.1181192 | 0.51  | 0.369 | 4.06E-06 | 2.6 | ADAM10    | 1.382113821 |
| ERO1B4         | 1.69E-10 | 0.1256928 | 0.162 | 0.096 | 4.07E-06 | 2.6 | ERO1B     | 1.6875      |
| TTC174         | 1.84E-10 | 0.1784379 | 0.405 | 0.292 | 4.43E-06 | 2.6 | TTC17     | 1.386986301 |
| CLEC16A2       | 2.02E-10 | 0.1500168 | 0.237 | 0.155 | 4.87E-06 | 2.6 | CLEC16A   | 1.529032258 |
| SCCPDH2        | 2.10E-10 | 0.1264733 | 0.16  | 0.095 | 5.06E-06 | 2.6 | SCCPDH    | 1.684210526 |
| RPAP23         | 2.22E-10 | 0.197201  | 0.288 | 0.197 | 5.36E-06 | 2.6 | RPAP2     | 1.461928934 |
| SBDS1          | 2.24E-10 | 0.1068891 | 0.155 | 0.091 | 5.40E-06 | 2.6 | SBDS      | 1.703296703 |
| TGM23          | 2.29E-10 | 0.1409788 | 0.16  | 0.095 | 5.51E-06 | 2.6 | TGM2      | 1.684210526 |
| OGT3           | 2.36E-10 | 0.1695669 | 0.527 | 0.398 | 5.70E-06 | 2.6 | OGT       | 1.324120603 |
| TJP24          | 2.37E-10 | 0.1250779 | 0.44  | 0.316 | 5.71E-06 | 2.6 | TJP2      | 1.392405063 |
| GUSB5          | 2.39E-10 | 0.1204145 | 0.089 | 0.045 | 5.76E-06 | 2.6 | GUSB      | 1.977777778 |
| FAM208A4       | 2.40E-10 | 0.1612575 | 0.144 | 0.084 | 5.79E-06 | 2.6 | FAM208A   | 1.714285714 |
| RUFY13         | 2.45E-10 | 0.1636369 | 0.17  | 0.103 | 5.91E-06 | 2.6 | RUFY1     | 1.650485437 |
| LAMC12         | 2.55E-10 | 0.1228077 | 0.365 | 0.257 | 6.15E-06 | 2.6 | LAMC1     | 1.420233463 |
| HNF4G2         | 2.57E-10 | 0.1181789 | 0.053 | 0.022 | 6.21E-06 | 2.6 | HNF4G     | 2.409090909 |
| SLC16A44       | 2.66E-10 | 0.1094777 | 0.162 | 0.096 | 6.40E-06 | 2.6 | SLC16A4   | 1.6875      |
| MAP2K31        | 2.69E-10 | 0.104008  | 0.11  | 0.059 | 6.48E-06 | 2.6 | MAP2K3    | 1.86440678  |
| CASP74         | 2.71E-10 | 0.1567962 | 0.239 | 0.158 | 6.54E-06 | 2.6 | CASP7     | 1.512658228 |
| MAL24          | 2.76E-10 | 0.1008195 | 0.481 | 0.349 | 6.66E-06 | 2.6 | MAL2      | 1.378223496 |
| PPP1R15B5      | 2.83E-10 | 0.1281556 | 0.126 | 0.07  | 6.83E-06 | 2.6 | PPP1R15B  | 1.8         |
| IL1RN4         | 2.83E-10 | 0.1385724 | 0.097 | 0.05  | 6.84E-06 | 2.6 | IL1RN     | 1.94        |
| LINC010364     | 2.88E-10 | 0.1723319 | 0.155 | 0.093 | 6.94E-06 | 2.6 | LINC01036 | 1.666666667 |
| GNB14          | 2.92E-10 | 0.1195363 | 0.467 | 0.34  | 7.04E-06 | 2.6 | GNB1      | 1.373529412 |
| PARM13         | 2.97E-10 | 0.1176715 | 0.124 | 0.069 | 7.16E-06 | 2.6 | PARM1     | 1.797101449 |
| YY1AP13        | 3.07E-10 | 0.1385808 | 0.255 | 0.169 | 7.40E-06 | 2.6 | YY1AP1    | 1.50887574  |
| NFIL34         | 3.25E-10 | 0.1401213 | 0.277 | 0.185 | 7.84E-06 | 2.6 | NFIL3     | 1.497297297 |
| TET32          | 3.28E-10 | 0.1598701 | 0.2   | 0.127 | 7.92E-06 | 2.6 | TET3      | 1.57480315  |
| ZNF2673        | 3.35E-10 | 0.114477  | 0.245 | 0.159 | 8.08E-06 | 2.6 | ZNF267    | 1.540880503 |
| ARID1B4        | 3.45E-10 | 0.135028  | 0.632 | 0.489 | 8.31E-06 | 2.6 | ARID1B    | 1.292433538 |
| PPP2R2D3       | 3.46E-10 | 0.1268782 | 0.266 | 0.177 | 8.35E-06 | 2.6 | PPP2R2D   | 1.502824859 |
| MAK2           | 3.65E-10 | 0.138843  | 0.151 | 0.089 | 8.80E-06 | 2.6 | MAK       | 1.696629213 |
| PEBP14         | 3.70E-10 | 0.113556  | 0.26  | 0.17  | 8.92E-06 | 2.6 | PEBP1     | 1.529411765 |
| ING13          | 3.84E-10 | 0.1038455 | 0.065 | 0.029 | 9.25E-06 | 2.6 | ING1      | 2.24137931  |
| ERBB32         | 3.85E-10 | 0.1196061 | 0.207 | 0.13  | 9.28E-06 | 2.6 | ERBB3     | 1.592307692 |
| DNAAF21        | 3.92E-10 | 0.1307639 | 0.059 | 0.025 | 9.45E-06 | 2.6 | DNAAF2    | 2.36        |
| POGZ3          | 4.00E-10 | 0.1821953 | 0.368 | 0.262 | 9.64E-06 | 2.6 | POGZ      | 1.404580153 |
| RP11-212D19.43 | 4.08E-10 | 0.1077882 | 0.073 | 0.034 | 9.84E-06 | 2.6 | RP11-212D | 2.147058824 |
| CTNNA12        | 4.21E-10 | 0.1312035 | 0.675 | 0.533 | 1.01E-05 | 2.6 | CTNNA1    | 1.26641651  |
| NPFFR24        | 4.21E-10 | 0.1308003 | 0.058 | 0.025 | 1.02E-05 | 2.6 | NPFFR2    | 2.32        |
| CKS25          | 4.63E-10 | 0.1396756 | 0.31  | 0.215 | 1.12E-05 | 2.6 | CKS2      | 1.441860465 |
| CPD3           | 4.66E-10 | 0.1969906 | 0.333 | 0.237 | 1.12E-05 | 2.6 | CPD       | 1.405063291 |
| SUN13          | 4.73E-10 | 0.1320854 | 0.205 | 0.129 | 1.14E-05 | 2.6 | SUN1      | 1.589147287 |
| SFMBT11        | 4.86E-10 | 0.1348878 | 0.108 | 0.058 | 1.17E-05 | 2.6 | SFMBT1    | 1.862068966 |
| BRD23          | 5.08E-10 | 0.1492512 | 0.369 | 0.266 | 1.22E-05 | 2.6 | BRD2      | 1.387218045 |
| GRB104         | 5.20E-10 | 0.1486537 | 0.266 | 0.179 | 1.25E-05 | 2.6 | GRB10     | 1.48603352  |
| SULF23         | 5.24E-10 | 0.1107692 | 0.175 | 0.107 | 1.26E-05 | 2.6 | SULF2     | 1.635514019 |
| RNF1283        | 5.39E-10 | 0.1784693 | 0.196 | 0.125 | 1.30E-05 | 2.6 | RNF128    | 1.568       |

|               |          |           |       |       |          |     |             |             |
|---------------|----------|-----------|-------|-------|----------|-----|-------------|-------------|
| MXD13         | 5.41E-10 | 0.1442034 | 0.302 | 0.209 | 1.30E-05 | 2.6 | MXD1        | 1.444976077 |
| NR3C13        | 5.46E-10 | 0.1340319 | 0.333 | 0.231 | 1.32E-05 | 2.6 | NR3C1       | 1.441558442 |
| HERPUD22      | 5.55E-10 | 0.1352496 | 0.116 | 0.064 | 1.34E-05 | 2.6 | HERPUD2     | 1.8125      |
| CMTM42        | 5.60E-10 | 0.13992   | 0.227 | 0.148 | 1.35E-05 | 2.6 | CMTM4       | 1.533783784 |
| HS3ST3B12     | 5.70E-10 | 0.1299293 | 0.06  | 0.026 | 1.37E-05 | 2.6 | HS3ST3B1    | 2.307692308 |
| FAM110C3      | 5.75E-10 | 0.1089067 | 0.081 | 0.04  | 1.39E-05 | 2.6 | FAM110C     | 2.025       |
| PARK22        | 5.91E-10 | 0.1939105 | 0.263 | 0.179 | 1.42E-05 | 2.6 | PARK2       | 1.469273743 |
| SRGAP2B2      | 6.07E-10 | 0.1498139 | 0.141 | 0.083 | 1.46E-05 | 2.6 | SRGAP2B     | 1.698795181 |
| KIAA02322     | 6.15E-10 | 0.119887  | 0.286 | 0.193 | 1.48E-05 | 2.6 | KIAA0232    | 1.481865285 |
| ZMIZ13        | 6.17E-10 | 0.1002946 | 0.158 | 0.094 | 1.49E-05 | 2.6 | ZMIZ1       | 1.680851064 |
| SDHA2         | 6.19E-10 | 0.2047567 | 0.148 | 0.089 | 1.49E-05 | 2.6 | SDHA        | 1.662921348 |
| COG72         | 6.40E-10 | 0.1428548 | 0.145 | 0.085 | 1.54E-05 | 2.6 | COG7        | 1.705882353 |
| PRPF32        | 6.43E-10 | 0.1409788 | 0.202 | 0.129 | 1.55E-05 | 2.6 | PRPF3       | 1.565891473 |
| AKAP133       | 6.62E-10 | 0.1010536 | 0.745 | 0.606 | 1.60E-05 | 2.6 | AKAP13      | 1.229372937 |
| TNS33         | 6.67E-10 | 0.1284916 | 0.121 | 0.069 | 1.61E-05 | 2.6 | TNS3        | 1.753623188 |
| SUZ122        | 6.72E-10 | 0.1137419 | 0.27  | 0.18  | 1.62E-05 | 2.6 | SUZ12       | 1.5         |
| IQSEC11       | 6.74E-10 | 0.1135954 | 0.044 | 0.017 | 1.63E-05 | 2.6 | IQSEC1      | 2.588235294 |
| RAD23B3       | 6.77E-10 | 0.1746167 | 0.606 | 0.48  | 1.63E-05 | 2.6 | RAD23B      | 1.2625      |
| PGM22         | 7.24E-10 | 0.1295772 | 0.133 | 0.076 | 1.75E-05 | 2.6 | PGM2        | 1.75        |
| ELP23         | 7.27E-10 | 0.1185506 | 0.311 | 0.212 | 1.75E-05 | 2.6 | ELP2        | 1.466981132 |
| PREX15        | 7.55E-10 | 0.1046936 | 0.1   | 0.052 | 1.82E-05 | 2.6 | PREX1       | 1.923076923 |
| NSUN21        | 7.81E-10 | 0.1032982 | 0.071 | 0.033 | 1.88E-05 | 2.6 | NSUN2       | 2.151515152 |
| KLF94         | 7.84E-10 | 0.1528236 | 0.229 | 0.151 | 1.89E-05 | 2.6 | KLF9        | 1.516556291 |
| BAZ2B3        | 8.34E-10 | 0.2107819 | 0.596 | 0.476 | 2.01E-05 | 2.6 | BAZ2B       | 1.25210084  |
| RPS10-NUDT32  | 8.79E-10 | 0.116175  | 0.089 | 0.046 | 2.12E-05 | 2.6 | RPS10-NUDT3 | 1.934782609 |
| MEF2D2        | 9.13E-10 | 0.1037547 | 0.118 | 0.066 | 2.20E-05 | 2.6 | MEF2D       | 1.787878788 |
| KLF65         | 9.19E-10 | 0.1212368 | 0.705 | 0.565 | 2.21E-05 | 2.6 | KLF6        | 1.247787611 |
| IRF2BPL4      | 9.47E-10 | 0.1446759 | 0.244 | 0.161 | 2.28E-05 | 2.6 | IRF2BPL     | 1.51552795  |
| PGRMC23       | 9.74E-10 | 0.1137383 | 0.2   | 0.126 | 2.35E-05 | 2.6 | PGRMC2      | 1.587301587 |
| SPTSSB4       | 9.87E-10 | 0.1600588 | 0.148 | 0.089 | 2.38E-05 | 2.6 | SPTSSB      | 1.662921348 |
| LINC005783    | 9.89E-10 | 0.184292  | 0.126 | 0.073 | 2.38E-05 | 2.6 | LINC00578   | 1.726027397 |
| ZSCAN16-AS13  | 1.07E-09 | 0.1534616 | 0.149 | 0.089 | 2.58E-05 | 2.6 | ZSCAN16-A   | 1.674157303 |
| CTD-2369P2.52 | 1.16E-09 | 0.1380902 | 0.061 | 0.027 | 2.80E-05 | 2.6 | CTD-2369P   | 2.259259259 |
| NT5DC31       | 1.17E-09 | 0.1603928 | 0.082 | 0.041 | 2.81E-05 | 2.6 | NT5DC3      | 2           |
| TTBK24        | 1.17E-09 | 0.1146131 | 0.237 | 0.156 | 2.82E-05 | 2.6 | TTBK2       | 1.519230769 |
| NUDT34        | 1.21E-09 | 0.1068112 | 0.133 | 0.076 | 2.92E-05 | 2.6 | NUDT3       | 1.75        |
| FADS33        | 1.26E-09 | 0.1590067 | 0.182 | 0.115 | 3.05E-05 | 2.6 | FADS3       | 1.582608696 |
| CDH110        | 1.42E-09 | 0.1360497 | 0.742 | 0.6   | 3.43E-05 | 2.6 | CDH1        | 1.236666667 |
| INTS124       | 1.51E-09 | 0.1616912 | 0.298 | 0.207 | 3.65E-05 | 2.6 | INTS12      | 1.439613527 |
| CARS23        | 1.52E-09 | 0.1008945 | 0.105 | 0.057 | 3.66E-05 | 2.6 | CARS2       | 1.842105263 |
| CNST2         | 1.58E-09 | 0.1452827 | 0.117 | 0.066 | 3.81E-05 | 2.6 | CNST        | 1.772727273 |
| SH2D4A2       | 1.59E-09 | 0.180104  | 0.1   | 0.054 | 3.83E-05 | 2.6 | SH2D4A      | 1.851851852 |
| HSDL12        | 1.63E-09 | 0.1617719 | 0.074 | 0.036 | 3.93E-05 | 2.6 | HSDL1       | 2.055555556 |
| LINC011372    | 1.63E-09 | 0.1357379 | 0.1   | 0.054 | 3.94E-05 | 2.6 | LINC01137   | 1.851851852 |
| ZCCHC143      | 1.71E-09 | 0.1356654 | 0.119 | 0.068 | 4.12E-05 | 2.6 | ZCCHC14     | 1.75        |
| TMPRSS11E4    | 1.74E-09 | 0.1177645 | 0.099 | 0.053 | 4.20E-05 | 2.6 | TMPRSS11    | 1.867924528 |
| AZIN1-AS12    | 1.75E-09 | 0.1085651 | 0.097 | 0.051 | 4.21E-05 | 2.6 | AZIN1-AS1   | 1.901960784 |
| RPS6KA22      | 1.76E-09 | 0.135513  | 0.248 | 0.166 | 4.23E-05 | 2.6 | RPS6KA2     | 1.493975904 |
| WDR112        | 1.76E-09 | 0.1639039 | 0.141 | 0.084 | 4.25E-05 | 2.6 | WDR11       | 1.678571429 |
| TOM1L13       | 1.78E-09 | 0.1496815 | 0.366 | 0.262 | 4.28E-05 | 2.6 | TOM1L1      | 1.396946565 |
| UBAC23        | 1.98E-09 | 0.1764875 | 0.319 | 0.227 | 4.77E-05 | 2.6 | UBAC2       | 1.405286344 |
| GNS5          | 1.99E-09 | 0.1402723 | 0.151 | 0.091 | 4.80E-05 | 2.6 | GNS         | 1.659340659 |

|            |          |           |       |       |             |     |           |             |
|------------|----------|-----------|-------|-------|-------------|-----|-----------|-------------|
| RAB305     | 2.00E-09 | 0.139623  | 0.19  | 0.12  | 4.82E-05    | 2.6 | RAB30     | 1.583333333 |
| GDE14      | 2.04E-09 | 0.1313803 | 0.218 | 0.142 | 4.92E-05    | 2.6 | GDE1      | 1.535211268 |
| FAM189A23  | 2.05E-09 | 0.1210411 | 0.117 | 0.066 | 4.95E-05    | 2.6 | FAM189A2  | 1.772727273 |
| CD823      | 2.11E-09 | 0.121775  | 0.095 | 0.05  | 5.10E-05    | 2.6 | CD82      | 1.9         |
| DLGAP42    | 2.12E-09 | 0.1043715 | 0.2   | 0.128 | 5.12E-05    | 2.6 | DLGAP4    | 1.5625      |
| HTT3       | 2.13E-09 | 0.1287794 | 0.246 | 0.165 | 5.13E-05    | 2.6 | HTT       | 1.490909091 |
| TCF123     | 2.20E-09 | 0.1089951 | 0.731 | 0.588 | 5.30E-05    | 2.6 | TCF12     | 1.243197279 |
| TRAF3IP12  | 2.21E-09 | 0.1130403 | 0.088 | 0.046 | 5.32E-05    | 2.6 | TRAF3IP1  | 1.913043478 |
| FAM193A2   | 2.22E-09 | 0.1196218 | 0.261 | 0.176 | 5.35E-05    | 2.6 | FAM193A   | 1.482954545 |
| MAP3K92    | 2.22E-09 | 0.1067027 | 0.243 | 0.161 | 5.35E-05    | 2.6 | MAP3K9    | 1.50931677  |
| GPS23      | 2.34E-09 | 0.1650157 | 0.249 | 0.168 | 5.64E-05    | 2.6 | GPS2      | 1.482142857 |
| TERF2IP2   | 2.42E-09 | 0.1434987 | 0.233 | 0.156 | 5.84E-05    | 2.6 | TERF2IP   | 1.493589744 |
| PARP83     | 2.58E-09 | 0.1268137 | 0.237 | 0.157 | 6.23E-05    | 2.6 | PARP8     | 1.50955414  |
| PAFAH1B14  | 2.59E-09 | 0.1329473 | 0.488 | 0.365 | 6.26E-05    | 2.6 | PAFAH1B1  | 1.336986301 |
| TBC1D44    | 2.61E-09 | 0.1618126 | 0.279 | 0.193 | 6.29E-05    | 2.6 | TBC1D4    | 1.445595855 |
| MSL14      | 2.78E-09 | 0.1527019 | 0.225 | 0.15  | 6.71E-05    | 2.6 | MSL1      | 1.5         |
| OCLN3      | 2.89E-09 | 0.1404019 | 0.449 | 0.333 | 6.97E-05    | 2.6 | OCLN      | 1.348348348 |
| GATA32     | 2.92E-09 | 0.1654409 | 0.274 | 0.191 | 7.05E-05    | 2.6 | GATA3     | 1.434554974 |
| PPP1R181   | 2.96E-09 | 0.1275859 | 0.102 | 0.055 | 7.13E-05    | 2.6 | PPP1R18   | 1.854545455 |
| BRWD13     | 2.96E-09 | 0.1237953 | 0.502 | 0.369 | 7.15E-05    | 2.6 | BRWD1     | 1.360433604 |
| ATP2C13    | 2.99E-09 | 0.1452723 | 0.318 | 0.225 | 7.20E-05    | 2.6 | ATP2C1    | 1.413333333 |
| TDRD32     | 3.05E-09 | 0.114467  | 0.169 | 0.104 | 7.36E-05    | 2.6 | TDRD3     | 1.625       |
| ZNF5162    | 3.09E-09 | 0.114013  | 0.149 | 0.089 | 7.45E-05    | 2.6 | ZNF516    | 1.674157303 |
| MBD53      | 3.24E-09 | 0.1183745 | 0.414 | 0.302 | 7.82E-05    | 2.6 | MBD5      | 1.370860927 |
| STK382     | 3.42E-09 | 0.1202092 | 0.356 | 0.251 | 8.24E-05    | 2.6 | STK38     | 1.418326693 |
| DENND1A3   | 3.50E-09 | 0.1416359 | 0.361 | 0.261 | 8.43E-05    | 2.6 | DENND1A   | 1.383141762 |
| PPP1CB3    | 3.65E-09 | 0.1331776 | 0.467 | 0.35  | 8.81E-05    | 2.6 | PPP1CB    | 1.334285714 |
| KMT2C1     | 3.80E-09 | 0.1381797 | 0.724 | 0.594 | 9.16E-05    | 2.6 | KMT2C     | 1.218855219 |
| OLFM23     | 3.86E-09 | 0.104122  | 0.063 | 0.029 | 9.32E-05    | 2.6 | OLFM2     | 2.172413793 |
| AUTS24     | 3.93E-09 | 0.1281256 | 0.654 | 0.523 | 9.48E-05    | 2.6 | AUTS2     | 1.250478011 |
| DGKD4      | 4.02E-09 | 0.1330841 | 0.191 | 0.122 | 9.70E-05    | 2.6 | DGKD      | 1.56557377  |
| PPARG3     | 4.19E-09 | 0.177999  | 0.228 | 0.154 | 0.000101145 | 2.6 | PPARG     | 1.480519481 |
| SPG202     | 4.27E-09 | 0.1209656 | 0.197 | 0.127 | 0.000102846 | 2.6 | SPG20     | 1.551181102 |
| H2AFZ3     | 4.37E-09 | 0.1052393 | 0.774 | 0.666 | 0.000105299 | 2.6 | H2AFZ     | 1.162162162 |
| DIXDC15    | 4.68E-09 | 0.2680609 | 0.178 | 0.114 | 0.000112843 | 2.6 | DIXDC1    | 1.561403509 |
| SPG74      | 4.72E-09 | 0.1542738 | 0.113 | 0.064 | 0.000113787 | 2.6 | SPG7      | 1.765625    |
| SLC9C13    | 4.92E-09 | 0.1358687 | 0.103 | 0.056 | 0.000118689 | 2.6 | SLC9C1    | 1.839285714 |
| KDM7A4     | 5.27E-09 | 0.1006885 | 0.381 | 0.27  | 0.000127008 | 2.6 | KDM7A     | 1.411111111 |
| FAM151B2   | 5.37E-09 | 0.1308795 | 0.113 | 0.064 | 0.00012937  | 2.6 | FAM151B   | 1.765625    |
| LMCD1-AS13 | 5.52E-09 | 0.1081098 | 0.086 | 0.045 | 0.000133018 | 2.6 | LMCD1-AS: | 1.911111111 |
| SMARCA24   | 5.53E-09 | 0.1207552 | 0.414 | 0.307 | 0.000133311 | 2.6 | SMARCA2   | 1.348534202 |
| COL4A3BP2  | 5.55E-09 | 0.1536409 | 0.206 | 0.136 | 0.000133833 | 2.6 | COL4A3BP  | 1.514705882 |
| MARCKSL14  | 5.64E-09 | 0.1555091 | 0.228 | 0.15  | 0.000136078 | 2.6 | MARCKSL1  | 1.52        |
| KSR13      | 5.70E-09 | 0.1332517 | 0.078 | 0.04  | 0.000137407 | 2.6 | KSR1      | 1.95        |
| SNRNP2001  | 5.78E-09 | 0.1120504 | 0.193 | 0.124 | 0.000139278 | 2.6 | SNRNP200  | 1.556451613 |
| MYLIP4     | 5.83E-09 | 0.146263  | 0.148 | 0.091 | 0.000140628 | 2.6 | MYLIP     | 1.626373626 |
| LRCH32     | 6.17E-09 | 0.1602246 | 0.452 | 0.343 | 0.000148661 | 2.6 | LRCH3     | 1.317784257 |
| AHCTF12    | 6.24E-09 | 0.1395031 | 0.221 | 0.147 | 0.000150454 | 2.6 | AHCTF1    | 1.503401361 |
| GRHL23     | 6.25E-09 | 0.1989661 | 0.381 | 0.279 | 0.000150636 | 2.6 | GRHL2     | 1.365591398 |
| PRKAA23    | 6.33E-09 | 0.108154  | 0.197 | 0.127 | 0.000152597 | 2.6 | PRKAA2    | 1.551181102 |
| DNAH55     | 6.38E-09 | 0.1082459 | 0.117 | 0.067 | 0.000153869 | 2.6 | DNAH5     | 1.746268657 |
| ATXN23     | 6.61E-09 | 0.1293972 | 0.443 | 0.331 | 0.000159288 | 2.6 | ATXN2     | 1.33836858  |

|               |          |           |       |       |             |     |           |             |
|---------------|----------|-----------|-------|-------|-------------|-----|-----------|-------------|
| HNRNPC3       | 6.61E-09 | 0.1224286 | 0.873 | 0.78  | 0.000159502 | 2.6 | HNRNPC    | 1.119230769 |
| ZZEF13        | 7.15E-09 | 0.1340853 | 0.161 | 0.101 | 0.000172492 | 2.6 | ZZEF1     | 1.594059406 |
| MGME12        | 7.70E-09 | 0.1116215 | 0.128 | 0.076 | 0.000185659 | 2.6 | MGME1     | 1.684210526 |
| MAP3K73       | 7.71E-09 | 0.1293235 | 0.156 | 0.096 | 0.000185803 | 2.6 | MAP3K7    | 1.625       |
| MYOF3         | 7.78E-09 | 0.1314534 | 0.735 | 0.594 | 0.000187618 | 2.6 | MYOF      | 1.237373737 |
| VAT13         | 7.85E-09 | 0.1139233 | 0.209 | 0.137 | 0.000189314 | 2.6 | VAT1      | 1.525547445 |
| MLF13         | 8.25E-09 | 0.1144009 | 0.34  | 0.243 | 0.000198918 | 2.6 | MLF1      | 1.399176955 |
| PPP4R3B2      | 8.36E-09 | 0.1221809 | 0.25  | 0.171 | 0.000201642 | 2.6 | PPP4R3B   | 1.461988304 |
| TRIB13        | 8.54E-09 | 0.1010554 | 0.314 | 0.22  | 0.000205947 | 2.6 | TRIB1     | 1.427272727 |
| SLC39A13      | 8.72E-09 | 0.126279  | 0.163 | 0.103 | 0.000210355 | 2.6 | SLC39A1   | 1.582524272 |
| PPTC72        | 9.74E-09 | 0.1011449 | 0.275 | 0.191 | 0.000234768 | 2.6 | PPTC7     | 1.439790576 |
| GABPB12       | 1.06E-08 | 0.1477953 | 0.18  | 0.116 | 0.000256384 | 2.6 | GABPB1    | 1.551724138 |
| SNRPA12       | 1.22E-08 | 0.1392121 | 0.155 | 0.097 | 0.000294014 | 2.6 | SNRPA1    | 1.597938144 |
| BCOR5         | 1.23E-08 | 0.1603647 | 0.627 | 0.508 | 0.000296423 | 2.6 | BCOR      | 1.234251969 |
| SAFB23        | 1.27E-08 | 0.1024679 | 0.11  | 0.062 | 0.000305099 | 2.6 | SAFB2     | 1.774193548 |
| CLIP12        | 1.36E-08 | 0.1178438 | 0.511 | 0.396 | 0.000326747 | 2.6 | CLIP1     | 1.29040404  |
| DNMBP2        | 1.43E-08 | 0.1091034 | 0.118 | 0.069 | 0.000343684 | 2.6 | DNMBP     | 1.710144928 |
| ZNRF13        | 1.46E-08 | 0.1051473 | 0.244 | 0.165 | 0.000351015 | 2.6 | ZNRF1     | 1.478787879 |
| LPGAT12       | 1.47E-08 | 0.1319438 | 0.141 | 0.086 | 0.000354555 | 2.6 | LPGAT1    | 1.639534884 |
| ZBTB114       | 1.83E-08 | 0.1094574 | 0.14  | 0.085 | 0.000442471 | 2.6 | ZBTB11    | 1.647058824 |
| SREBF24       | 1.91E-08 | 0.119654  | 0.488 | 0.374 | 0.000460845 | 2.6 | SREBF2    | 1.304812834 |
| SLTM2         | 1.95E-08 | 0.162479  | 0.394 | 0.292 | 0.000469476 | 2.6 | SLTM      | 1.349315068 |
| PBX33         | 1.98E-08 | 0.1330507 | 0.144 | 0.088 | 0.000478087 | 2.6 | PBX3      | 1.636363636 |
| CMTM32        | 2.02E-08 | 0.1014106 | 0.079 | 0.041 | 0.000486043 | 2.6 | CMTM3     | 1.926829268 |
| PLGRKT3       | 2.06E-08 | 0.1202698 | 0.131 | 0.078 | 0.000496686 | 2.6 | PLGRKT    | 1.679487179 |
| C9orf842      | 2.07E-08 | 0.1258371 | 0.114 | 0.066 | 0.000499292 | 2.6 | C9orf84   | 1.727272727 |
| COQ10B1       | 2.12E-08 | 0.1215404 | 0.197 | 0.13  | 0.000510363 | 2.6 | COQ10B    | 1.515384615 |
| ZXDC4         | 2.17E-08 | 0.1027026 | 0.141 | 0.086 | 0.000523762 | 2.6 | ZXDC      | 1.639534884 |
| RP1-34B20.212 | 2.25E-08 | 0.1084727 | 0.088 | 0.048 | 0.000542359 | 2.6 | RP1-34B20 | 1.833333333 |
| PTTG1IP2      | 2.28E-08 | 0.1592632 | 0.236 | 0.164 | 0.00055054  | 2.6 | PTTG1IP   | 1.43902439  |
| TM9SF24       | 2.33E-08 | 0.1195887 | 0.351 | 0.255 | 0.00056286  | 2.6 | TM9SF2    | 1.376470588 |
| ZNF4872       | 2.34E-08 | 0.1282117 | 0.099 | 0.055 | 0.000565089 | 2.6 | ZNF487    | 1.8         |
| FAM83F2       | 2.43E-08 | 0.1110677 | 0.076 | 0.039 | 0.00058557  | 2.6 | FAM83F    | 1.948717949 |
| IRF63         | 2.46E-08 | 0.1038672 | 0.321 | 0.23  | 0.000593947 | 2.6 | IRF6      | 1.395652174 |
| TPCN14        | 2.48E-08 | 0.1244014 | 0.237 | 0.163 | 0.000598095 | 2.6 | TPCN1     | 1.45398773  |
| VPS13C3       | 2.52E-08 | 0.1208824 | 0.333 | 0.24  | 0.000608266 | 2.6 | VPS13C    | 1.3875      |
| LYPD63        | 2.54E-08 | 0.1132537 | 0.092 | 0.051 | 0.00061174  | 2.6 | LYPD6     | 1.803921569 |
| GLO14         | 2.58E-08 | 0.1370758 | 0.246 | 0.169 | 0.000621624 | 2.6 | GLO1      | 1.455621302 |
| ARHGEF63      | 2.66E-08 | 0.112192  | 0.126 | 0.076 | 0.000641777 | 2.6 | ARHGEF6   | 1.657894737 |
| WDTC12        | 2.69E-08 | 0.1289573 | 0.134 | 0.081 | 0.000649043 | 2.6 | WDTC1     | 1.654320988 |
| TAF16         | 2.70E-08 | 0.1182349 | 0.211 | 0.141 | 0.000651431 | 2.6 | TAF1      | 1.496453901 |
| RNF2133       | 2.83E-08 | 0.1091855 | 0.257 | 0.177 | 0.000683064 | 2.6 | RNF213    | 1.451977401 |
| RAB22A3       | 2.97E-08 | 0.1138126 | 0.208 | 0.138 | 0.000715899 | 2.6 | RAB22A    | 1.507246377 |
| YBX32         | 3.00E-08 | 0.1117008 | 0.382 | 0.283 | 0.000723684 | 2.6 | YBX3      | 1.349823322 |
| WDFY23        | 3.01E-08 | 0.1252161 | 0.361 | 0.263 | 0.000725747 | 2.6 | WDFY2     | 1.372623574 |
| ATRX3         | 3.04E-08 | 0.1423099 | 0.607 | 0.477 | 0.000731906 | 2.6 | ATRX      | 1.272536688 |
| BIRC63        | 3.12E-08 | 0.1529391 | 0.676 | 0.56  | 0.000751573 | 2.6 | BIRC6     | 1.207142857 |
| TRIP123       | 3.22E-08 | 0.1139098 | 0.434 | 0.324 | 0.000776722 | 2.6 | TRIP12    | 1.339506173 |
| FAM120B3      | 3.24E-08 | 0.1407754 | 0.18  | 0.118 | 0.000780811 | 2.6 | FAM120B   | 1.525423729 |
| LYPD33        | 3.24E-08 | 0.1260778 | 0.108 | 0.063 | 0.000781045 | 2.6 | LYPD3     | 1.714285714 |
| DNM31         | 3.34E-08 | 0.1370132 | 0.08  | 0.043 | 0.000805207 | 2.6 | DNM3      | 1.860465116 |
| MCC3          | 3.46E-08 | 0.1218001 | 0.161 | 0.103 | 0.000834216 | 2.6 | MCC       | 1.563106796 |

|            |          |           |       |       |             |     |          |             |
|------------|----------|-----------|-------|-------|-------------|-----|----------|-------------|
| ARIH21     | 3.51E-08 | 0.1196035 | 0.211 | 0.141 | 0.000845237 | 2.6 | ARIH2    | 1.496453901 |
| BBOF14     | 3.74E-08 | 0.1017783 | 0.091 | 0.05  | 0.000902222 | 2.6 | BBOF1    | 1.82        |
| CNOT23     | 3.89E-08 | 0.1501749 | 0.517 | 0.4   | 0.000937359 | 2.6 | CNOT2    | 1.2925      |
| NOP104     | 4.05E-08 | 0.1158529 | 0.678 | 0.552 | 0.000975473 | 2.6 | NOP10    | 1.22826087  |
| MREG3      | 4.33E-08 | 0.1311589 | 0.208 | 0.139 | 0.001044048 | 2.6 | MREG     | 1.496402878 |
| YWHAB3     | 4.37E-08 | 0.1153655 | 0.42  | 0.311 | 0.001054373 | 2.6 | YWHAB    | 1.350482315 |
| CTNNAL13   | 4.45E-08 | 0.1246253 | 0.191 | 0.126 | 0.001073456 | 2.6 | CTNNAL1  | 1.515873016 |
| PPM1A3     | 4.54E-08 | 0.1618781 | 0.246 | 0.172 | 0.001093716 | 2.6 | PPM1A    | 1.430232558 |
| NUP982     | 4.57E-08 | 0.1243718 | 0.291 | 0.205 | 0.001102078 | 2.6 | NUP98    | 1.419512195 |
| TRIM272    | 4.60E-08 | 0.1345858 | 0.142 | 0.088 | 0.001109396 | 2.6 | TRIM27   | 1.613636364 |
| SLC22A41   | 4.64E-08 | 0.1023187 | 0.048 | 0.021 | 0.001119004 | 2.6 | SLC22A4  | 2.285714286 |
| DPY19L13   | 4.71E-08 | 0.1477123 | 0.151 | 0.095 | 0.001135691 | 2.6 | DPY19L1  | 1.589473684 |
| RPS6KC12   | 4.73E-08 | 0.1075036 | 0.166 | 0.107 | 0.001141322 | 2.6 | RPS6KC1  | 1.551401869 |
| DOT1L2     | 4.81E-08 | 0.1008864 | 0.054 | 0.025 | 0.00115922  | 2.6 | DOT1L    | 2.16        |
| FLJ128253  | 4.90E-08 | 0.1265171 | 0.121 | 0.073 | 0.001182216 | 2.6 | FLJ12825 | 1.657534247 |
| IL13RA13   | 4.99E-08 | 0.1075094 | 0.186 | 0.122 | 0.001203371 | 2.6 | IL13RA1  | 1.524590164 |
| SENP62     | 5.13E-08 | 0.1267581 | 0.404 | 0.307 | 0.001236076 | 2.6 | SENP6    | 1.315960912 |
| MARK13     | 5.17E-08 | 0.1068711 | 0.109 | 0.063 | 0.001247237 | 2.6 | MARK1    | 1.73015873  |
| SPSB12     | 5.18E-08 | 0.110144  | 0.137 | 0.084 | 0.001248433 | 2.6 | SPSB1    | 1.630952381 |
| ABHD22     | 5.21E-08 | 0.1311308 | 0.213 | 0.144 | 0.0012573   | 2.6 | ABHD2    | 1.479166667 |
| CHD13      | 5.36E-08 | 0.1042713 | 0.365 | 0.267 | 0.001293648 | 2.6 | CHD1     | 1.367041199 |
| SYT93      | 5.40E-08 | 0.1299921 | 0.08  | 0.043 | 0.00130176  | 2.6 | SYT9     | 1.860465116 |
| UBXN44     | 5.42E-08 | 0.1181557 | 0.41  | 0.307 | 0.001306433 | 2.6 | UBXN4    | 1.335504886 |
| GNG12-AS12 | 5.68E-08 | 0.103029  | 0.128 | 0.078 | 0.001368908 | 2.6 | GNG12-AS | 1.641025641 |
| SQRDL3     | 5.72E-08 | 0.1257288 | 0.262 | 0.185 | 0.001378348 | 2.6 | SQRDL    | 1.416216216 |
| CCSER21    | 6.13E-08 | 0.115001  | 0.261 | 0.183 | 0.001479207 | 2.6 | CCSER2   | 1.426229508 |
| OTUD15     | 6.36E-08 | 0.1269476 | 0.091 | 0.051 | 0.001533658 | 2.6 | OTUD1    | 1.784313725 |
| GNG72      | 6.37E-08 | 0.2397701 | 0.1   | 0.057 | 0.001535732 | 2.6 | GNG7     | 1.754385965 |
| WIPF24     | 6.52E-08 | 0.1163166 | 0.221 | 0.151 | 0.001571007 | 2.6 | WIPF2    | 1.463576159 |
| INO80D4    | 6.58E-08 | 0.1291887 | 0.684 | 0.563 | 0.001585452 | 2.6 | INO80D   | 1.214920071 |
| NRDC2      | 6.92E-08 | 0.1715323 | 0.292 | 0.212 | 0.001667914 | 2.6 | NRDC     | 1.377358491 |
| RPGR2      | 6.98E-08 | 0.1060328 | 0.142 | 0.088 | 0.001683384 | 2.6 | RPGR     | 1.613636364 |
| EPAS13     | 7.06E-08 | 0.1021689 | 0.221 | 0.15  | 0.001701637 | 2.6 | EPAS1    | 1.473333333 |
| HNRNPH11   | 7.54E-08 | 0.1595111 | 0.527 | 0.413 | 0.00181853  | 2.6 | HNRNPH1  | 1.276029056 |
| NCKAP13    | 7.91E-08 | 0.105952  | 0.553 | 0.429 | 0.001906992 | 2.6 | NCKAP1   | 1.289044289 |
| PLSCR23    | 7.94E-08 | 0.1007487 | 0.101 | 0.058 | 0.001914287 | 2.6 | PLSCR2   | 1.74137931  |
| CCDC502    | 8.29E-08 | 0.1692018 | 0.24  | 0.169 | 0.001998332 | 2.6 | CCDC50   | 1.420118343 |
| MCPH13     | 8.29E-08 | 0.1350029 | 0.248 | 0.173 | 0.001998677 | 2.6 | MCPH1    | 1.433526012 |
| UBR42      | 8.93E-08 | 0.12031   | 0.314 | 0.228 | 0.002153832 | 2.6 | UBR4     | 1.377192982 |
| PML3       | 9.00E-08 | 0.1157548 | 0.127 | 0.079 | 0.002168997 | 2.6 | PML      | 1.607594937 |
| UBR54      | 9.07E-08 | 0.1704676 | 0.581 | 0.466 | 0.002186038 | 2.6 | UBR5     | 1.246781116 |
| BTBD92     | 9.17E-08 | 0.1405256 | 0.348 | 0.257 | 0.002211226 | 2.6 | BTBD9    | 1.354085603 |
| DLG1-AS13  | 9.21E-08 | 0.1171293 | 0.078 | 0.042 | 0.002219995 | 2.6 | DLG1-AS1 | 1.857142857 |
| SIAE4      | 1.02E-07 | 0.1013257 | 0.083 | 0.046 | 0.002463784 | 2.6 | SIAE     | 1.804347826 |
| PTPRA2     | 1.03E-07 | 0.1141751 | 0.256 | 0.18  | 0.002491436 | 2.6 | PTPRA    | 1.422222222 |
| MYO5C2     | 1.05E-07 | 0.1015466 | 0.219 | 0.15  | 0.002532914 | 2.6 | MYO5C    | 1.46        |
| ZNFX12     | 1.10E-07 | 0.1377257 | 0.19  | 0.128 | 0.002645346 | 2.6 | ZNFX1    | 1.484375    |
| PPP4R12    | 1.10E-07 | 0.1017743 | 0.32  | 0.231 | 0.002659832 | 2.6 | PPP4R1   | 1.385281385 |
| DACH14     | 1.11E-07 | 0.105424  | 0.151 | 0.096 | 0.002684405 | 2.6 | DACH1    | 1.572916667 |
| HACD22     | 1.13E-07 | 0.1253637 | 0.144 | 0.092 | 0.002713083 | 2.6 | HACD2    | 1.565217391 |
| ZNF4383    | 1.13E-07 | 0.1218727 | 0.116 | 0.07  | 0.002713139 | 2.6 | ZNF438   | 1.657142857 |
| PNPLA83    | 1.17E-07 | 0.124568  | 0.366 | 0.276 | 0.002816157 | 2.6 | PNPLA8   | 1.326086957 |

|                |          |           |       |       |             |     |            |             |
|----------------|----------|-----------|-------|-------|-------------|-----|------------|-------------|
| RP11-507B12.24 | 1.19E-07 | 0.1717964 | 0.156 | 0.1   | 0.00286269  | 2.6 | RP11-507B  | 1.56        |
| HELLS4         | 1.24E-07 | 0.1025192 | 0.055 | 0.027 | 0.002988934 | 2.6 | HELLS      | 2.037037037 |
| HIST1H2BB4     | 1.34E-07 | 0.1325528 | 0.239 | 0.168 | 0.003240491 | 2.6 | HIST1H2BB  | 1.422619048 |
| CYSTM12        | 1.39E-07 | 0.1206374 | 0.284 | 0.205 | 0.003357448 | 2.6 | CYSTM1     | 1.385365854 |
| FBXO213        | 1.45E-07 | 0.1014926 | 0.162 | 0.105 | 0.003498542 | 2.6 | FBXO21     | 1.542857143 |
| MCU4           | 1.52E-07 | 0.1021911 | 0.186 | 0.124 | 0.003667304 | 2.6 | MCU        | 1.5         |
| VPS13B3        | 1.53E-07 | 0.1139945 | 0.294 | 0.211 | 0.003683285 | 2.6 | VPS13B     | 1.393364929 |
| WDR14          | 1.54E-07 | 0.1160752 | 0.251 | 0.176 | 0.003704052 | 2.6 | WDR1       | 1.426136364 |
| WDR444         | 1.63E-07 | 0.1019384 | 0.234 | 0.162 | 0.003932518 | 2.6 | WDR44      | 1.444444444 |
| SLC9A83        | 1.78E-07 | 0.1157045 | 0.137 | 0.086 | 0.0042812   | 2.6 | SLC9A8     | 1.593023256 |
| SUCLG23        | 1.80E-07 | 0.111753  | 0.199 | 0.134 | 0.004328898 | 2.6 | SUCLG2     | 1.485074627 |
| TRA2A2         | 1.80E-07 | 0.129128  | 0.503 | 0.398 | 0.004334182 | 2.6 | TRA2A      | 1.263819095 |
| ABHD17C3       | 1.82E-07 | 0.1232726 | 0.152 | 0.098 | 0.004392519 | 2.6 | ABHD17C    | 1.551020408 |
| CR1L1          | 1.88E-07 | 0.1168758 | 0.072 | 0.038 | 0.004526126 | 2.6 | CR1L       | 1.894736842 |
| DDX3X3         | 2.32E-07 | 0.111771  | 0.472 | 0.36  | 0.005592221 | 2.6 | DDX3X      | 1.311111111 |
| ZFX2           | 2.42E-07 | 0.1188871 | 0.175 | 0.116 | 0.005823894 | 2.6 | ZFX        | 1.50862069  |
| DYNLT33        | 2.46E-07 | 0.1198493 | 0.359 | 0.267 | 0.00594295  | 2.6 | DYNLT3     | 1.344569288 |
| DAZAP23        | 2.51E-07 | 0.1145848 | 0.535 | 0.421 | 0.006062327 | 2.6 | DAZAP2     | 1.270783848 |
| SRRM23         | 2.60E-07 | 0.1165011 | 0.294 | 0.214 | 0.006271669 | 2.6 | SRRM2      | 1.373831776 |
| SLK3           | 2.62E-07 | 0.1139384 | 0.319 | 0.233 | 0.006316214 | 2.6 | SLK        | 1.369098712 |
| RP11-6N13.14   | 2.76E-07 | 0.1290309 | 0.08  | 0.044 | 0.006646583 | 2.6 | RP11-6N13  | 1.818181818 |
| ELF14          | 2.91E-07 | 0.1157751 | 0.652 | 0.524 | 0.007014521 | 2.6 | ELF1       | 1.244274809 |
| KPNA63         | 3.02E-07 | 0.105429  | 0.379 | 0.282 | 0.007283728 | 2.6 | KPNA6      | 1.343971631 |
| NHS3           | 3.23E-07 | 0.2458699 | 0.23  | 0.167 | 0.007790992 | 2.6 | NHS        | 1.377245509 |
| MARS3          | 3.33E-07 | 0.1130299 | 0.21  | 0.145 | 0.008022258 | 2.6 | MARS       | 1.448275862 |
| UBE2E13        | 3.61E-07 | 0.1000836 | 0.446 | 0.342 | 0.008698588 | 2.6 | UBE2E1     | 1.304093567 |
| TMEM161B-AS13  | 3.86E-07 | 0.1714456 | 0.161 | 0.108 | 0.009308201 | 2.6 | TMEM161B   | 1.490740741 |
| IWS12          | 4.04E-07 | 0.1159331 | 0.213 | 0.147 | 0.009736621 | 2.6 | IWS1       | 1.448979592 |
| TMEM178B2      | 4.21E-07 | 0.1408117 | 0.12  | 0.075 | 0.010144418 | 2.6 | TMEM178B   | 1.6         |
| RND34          | 4.44E-07 | 0.101442  | 0.451 | 0.347 | 0.01069929  | 2.6 | RND3       | 1.299711816 |
| KLHL26         | 4.46E-07 | 0.1354289 | 0.197 | 0.136 | 0.01075919  | 2.6 | KLHL2      | 1.448529412 |
| JMY2           | 4.57E-07 | 0.1489986 | 0.188 | 0.13  | 0.01102229  | 2.6 | JMY        | 1.446153846 |
| CTC-490E21.123 | 4.60E-07 | 0.1290041 | 0.096 | 0.056 | 0.01109763  | 2.6 | CTC-490E2  | 1.714285714 |
| PPP4R3A2       | 4.89E-07 | 0.1072623 | 0.256 | 0.182 | 0.01179263  | 2.6 | PPP4R3A    | 1.406593407 |
| PIGA2          | 4.95E-07 | 0.102206  | 0.146 | 0.094 | 0.01193987  | 2.6 | PIGA       | 1.553191489 |
| RP11-238K6.14  | 5.00E-07 | 0.1557472 | 0.177 | 0.121 | 0.01205341  | 2.6 | RP11-238K6 | 1.462809917 |
| PRPF82         | 5.04E-07 | 0.1129763 | 0.131 | 0.083 | 0.01216078  | 2.6 | PRPF8      | 1.578313253 |
| SPTBN12        | 5.09E-07 | 0.1028125 | 0.297 | 0.217 | 0.01227398  | 2.6 | SPTBN1     | 1.368663594 |
| AC011288.22    | 5.11E-07 | 0.1322637 | 0.102 | 0.061 | 0.01231199  | 2.6 | AC011288   | 1.672131148 |
| CFAP702        | 5.34E-07 | 0.1018842 | 0.075 | 0.041 | 0.01288693  | 2.6 | CFAP70     | 1.829268293 |
| ATP6AP25       | 5.54E-07 | 0.1074504 | 0.205 | 0.142 | 0.0133504   | 2.6 | ATP6AP2    | 1.443661972 |
| SMC63          | 5.74E-07 | 0.1011858 | 0.117 | 0.073 | 0.01384224  | 2.6 | SMC6       | 1.602739726 |
| TRAF42         | 5.94E-07 | 0.1119344 | 0.082 | 0.047 | 0.01432211  | 2.6 | TRAF4      | 1.744680851 |
| TRAF3IP23      | 5.96E-07 | 0.1094486 | 0.182 | 0.124 | 0.01437305  | 2.6 | TRAF3IP2   | 1.467741935 |
| PRKD33         | 6.08E-07 | 0.1066789 | 0.166 | 0.111 | 0.01466516  | 2.6 | PRKD3      | 1.495495495 |
| LINC006572     | 6.19E-07 | 0.1158685 | 0.252 | 0.179 | 0.01492228  | 2.6 | LINC00657  | 1.407821229 |
| ZNF6083        | 6.97E-07 | 0.1304245 | 0.249 | 0.177 | 0.01680015  | 2.6 | ZNF608     | 1.406779661 |
| KANSL1L3       | 7.80E-07 | 0.1273396 | 0.286 | 0.213 | 0.01880022  | 2.6 | KANSL1L    | 1.342723005 |
| ADCY23         | 7.87E-07 | 0.1049961 | 0.109 | 0.067 | 0.01897981  | 2.6 | ADCY2      | 1.626865672 |
| GGNBP23        | 8.55E-07 | 0.12296   | 0.304 | 0.227 | 0.02062659  | 2.6 | GGNBP2     | 1.339207048 |
| SUMF13         | 9.18E-07 | 0.1358622 | 0.225 | 0.16  | 0.02212982  | 2.6 | SUMF1      | 1.40625     |
| GLTSCR1L4      | 9.22E-07 | 0.1246662 | 0.199 | 0.14  | 0.02223415  | 2.6 | GLTSCR1L   | 1.421428571 |



|                 |           |           |       |       |            |     |              |             |
|-----------------|-----------|-----------|-------|-------|------------|-----|--------------|-------------|
| C4orf192        | 9.60E-07  | 0.1003564 | 0.205 | 0.143 | 0.02313721 | 2.6 | C4orf19      | 1.433566434 |
| PEX132          | 9.91E-07  | 0.1080542 | 0.176 | 0.119 | 0.02390017 | 2.6 | PEX13        | 1.478991597 |
| AC073218.14     | 1.06E-06  | 0.1125953 | 0.136 | 0.088 | 0.0255773  | 2.6 | AC073218.    | 1.545454545 |
| FAM168B2        | 1.09E-06  | 0.1059362 | 0.138 | 0.09  | 0.02635445 | 2.6 | FAM168B      | 1.533333333 |
| LINC013174      | 1.11E-06  | 0.1084235 | 0.127 | 0.082 | 0.02674937 | 2.6 | LINC01317    | 1.548780488 |
| CCDC663         | 1.12E-06  | 0.1064317 | 0.194 | 0.135 | 0.0269769  | 2.6 | CCDC66       | 1.437037037 |
| LUZP13          | 1.17E-06  | 0.1100408 | 0.172 | 0.116 | 0.02821326 | 2.6 | LUZP1        | 1.482758621 |
| FANK14          | 1.41E-06  | 0.1119251 | 0.212 | 0.149 | 0.0341015  | 2.6 | FANK1        | 1.422818792 |
| UACA4           | 1.47E-06  | 0.1381725 | 0.267 | 0.198 | 0.0354919  | 2.6 | UACA         | 1.348484848 |
| GNG122          | 1.47E-06  | 0.1097978 | 0.42  | 0.325 | 0.03554419 | 2.6 | GNG12        | 1.292307692 |
| TYW12           | 1.59E-06  | 0.1573573 | 0.138 | 0.089 | 0.03842668 | 2.6 | TYW1         | 1.550561798 |
| ST142           | 1.63E-06  | 0.1111753 | 0.242 | 0.174 | 0.0393948  | 2.6 | ST14         | 1.390804598 |
| C5orf172        | 1.91E-06  | 0.1589513 | 0.168 | 0.115 | 0.04609596 | 2.6 | C5orf17      | 1.460869565 |
| RHOV4           | 1.93E-06  | 0.1198773 | 0.082 | 0.048 | 0.04655867 | 2.6 | RHOV         | 1.708333333 |
| RP11-1379J22.22 | 1.93E-06  | 0.1173403 | 0.105 | 0.065 | 0.04661793 | 2.6 | RP11-1379.   | 1.615384615 |
| RP11-206M11.72  | 0         | 4.495255  | 0.588 | 0.071 | 0          |     | 3 RP11-206M  | 8.281690141 |
| PIP1            | 0         | 4.261205  | 0.533 | 0.061 | 0          |     | 3 PIP        | 8.737704918 |
| SERPINA12       | 0         | 2.12721   | 0.517 | 0.064 | 0          |     | 3 SERPINA1   | 8.078125    |
| TFPI21          | 0         | 1.490705  | 0.339 | 0.005 | 0          |     | 3 TFPI2      | 67.8        |
| TAT2            | 0         | 1.318974  | 0.222 | 0.007 | 0          |     | 3 TAT        | 31.71428571 |
| MSMB            | 0         | 1.297772  | 0.157 | 0.003 | 0          |     | 3 MSMB       | 52.33333333 |
| IGSF1           | 0         | 0.7730943 | 0.182 | 0.005 | 0          |     | 3 IGSF1      | 36.4        |
| GLRA3           | 0         | 0.6432149 | 0.13  | 0.002 | 0          |     | 3 GLRA3      | 65          |
| PI15            | 3.35E-304 | 2.131779  | 0.262 | 0.015 | 8.09E-300  |     | 3 PI15       | 17.46666667 |
| HMGB3           | 3.21E-267 | 1.704935  | 0.381 | 0.041 | 7.73E-263  |     | 3 HMGB3      | 9.292682927 |
| APOD2           | 7.57E-262 | 3.30857   | 0.404 | 0.048 | 1.83E-257  |     | 3 APOD       | 8.416666667 |
| MUCL11          | 2.64E-261 | 6.700421  | 0.81  | 0.262 | 6.37E-257  |     | 3 MUCL1      | 3.091603053 |
| TAT-AS12        | 1.17E-158 | 0.648582  | 0.128 | 0.007 | 2.82E-154  |     | 3 TAT-AS1    | 18.28571429 |
| PCAT18          | 9.24E-149 | 0.3058334 | 0.092 | 0.003 | 2.23E-144  |     | 3 PCAT18     | 30.66666667 |
| FGG             | 1.86E-147 | 1.079728  | 0.044 | 0     | 4.48E-143  |     | 3 FGG        | #DIV/0!     |
| CP2             | 9.37E-147 | 2.187467  | 0.341 | 0.057 | 2.26E-142  |     | 3 CP         | 5.98245614  |
| PPP4R43         | 3.17E-139 | 1.297753  | 0.421 | 0.085 | 7.64E-135  |     | 3 PPP4R4     | 4.952941176 |
| MIR2052HG       | 1.45E-130 | 0.5914698 | 0.096 | 0.005 | 3.50E-126  |     | 3 MIR2052HG  | 19.2        |
| CYP4X11         | 7.90E-127 | 0.3168795 | 0.092 | 0.004 | 1.91E-122  |     | 3 CYP4X1     | 23          |
| UBXN10-AS1      | 1.89E-124 | 0.2539088 | 0.063 | 0.002 | 4.57E-120  |     | 3 UBXN10-AS1 | 31.5        |
| TANC23          | 5.57E-109 | 1.71995   | 0.82  | 0.47  | 1.34E-104  |     | 3 TANC2      | 1.744680851 |
| NPY1R           | 2.17E-104 | 0.3447553 | 0.096 | 0.006 | 5.23E-100  |     | 3 NPY1R      | 16          |
| RP11-136K7.2    | 2.38E-103 | 0.2065293 | 0.048 | 0.001 | 5.73E-99   |     | 3 RP11-136K  | 48          |
| HCAR3           | 5.65E-98  | 0.3679659 | 0.092 | 0.006 | 1.36E-93   |     | 3 HCAR3      | 15.33333333 |
| MAOA4           | 1.36E-90  | 0.7870239 | 0.272 | 0.054 | 3.28E-86   |     | 3 MAOA       | 5.037037037 |
| SLC1A12         | 9.94E-88  | 0.4672721 | 0.134 | 0.014 | 2.40E-83   |     | 3 SLC1A1     | 9.571428571 |
| CFTR1           | 1.57E-86  | 0.630668  | 0.119 | 0.012 | 3.79E-82   |     | 3 CFTR       | 9.916666667 |
| FGB             | 3.42E-85  | 0.387811  | 0.023 | 0     | 8.24E-81   |     | 3 FGB        | #DIV/0!     |
| GLUL2           | 2.11E-82  | 1.906775  | 0.705 | 0.371 | 5.08E-78   |     | 3 GLUL       | 1.900269542 |
| CTB-33O18.12    | 1.57E-78  | 0.2296905 | 0.059 | 0.003 | 3.79E-74   |     | 3 CTB-33O18  | 19.66666667 |
| AQP34           | 3.65E-73  | 0.6758135 | 0.245 | 0.052 | 8.80E-69   |     | 3 AQP3       | 4.711538462 |
| HMGCS21         | 2.81E-68  | 0.297846  | 0.059 | 0.003 | 6.78E-64   |     | 3 HMGCS2     | 19.66666667 |
| AZGP15          | 3.90E-61  | 1.243417  | 0.86  | 0.542 | 9.41E-57   |     | 3 AZGP1      | 1.586715867 |
| IRAK32          | 8.30E-60  | 0.4282204 | 0.126 | 0.018 | 2.00E-55   |     | 3 IRAK3      | 7           |
| SAT13           | 2.79E-57  | 0.9729307 | 1     | 0.98  | 6.73E-53   |     | 3 SAT1       | 1.020408163 |
| CECR2           | 1.49E-54  | 0.4313121 | 0.142 | 0.025 | 3.59E-50   |     | 3 CECR2      | 5.68        |
| MGST14          | 3.41E-54  | 0.8867759 | 0.952 | 0.858 | 8.23E-50   |     | 3 MGST1      | 1.10955711  |

|                |          |           |       |       |          |              |             |
|----------------|----------|-----------|-------|-------|----------|--------------|-------------|
| TMC53          | 3.73E-54 | 1.053194  | 0.498 | 0.216 | 9.00E-50 | 3 TMC5       | 2.305555556 |
| LEF1           | 6.69E-50 | 0.2012244 | 0.04  | 0.002 | 1.61E-45 | 3 LEF1       | 20          |
| INPP4B4        | 1.19E-46 | 0.8951315 | 0.621 | 0.324 | 2.88E-42 | 3 INPP4B     | 1.916666667 |
| MGP3           | 2.53E-44 | 0.6297929 | 0.956 | 0.816 | 6.11E-40 | 3 MGP        | 1.171568627 |
| MALAT16        | 1.88E-43 | 0.4632744 | 1     | 1     | 4.54E-39 | 3 MALAT1     | 1           |
| KCCAT2112      | 2.11E-43 | 1.005045  | 0.303 | 0.109 | 5.10E-39 | 3 KCCAT211   | 2.779816514 |
| SUB16          | 1.27E-42 | 1.369992  | 0.81  | 0.635 | 3.07E-38 | 3 SUB1       | 1.275590551 |
| ORM1           | 8.14E-42 | 0.1071661 | 0.013 | 0     | 1.96E-37 | 3 ORM1       | #DIV/0!     |
| RP11-146N18.1  | 1.90E-41 | 0.1768769 | 0.038 | 0.002 | 4.59E-37 | 3 RP11-146N  | 19          |
| PTGR12         | 3.54E-41 | 1.049687  | 0.531 | 0.278 | 8.53E-37 | 3 PTGR1      | 1.910071942 |
| DKK11          | 1.43E-40 | 0.1723964 | 0.021 | 0.001 | 3.46E-36 | 3 DKK1       | 21          |
| TMEM1655       | 2.50E-40 | 0.9146241 | 0.728 | 0.518 | 6.04E-36 | 3 TMEM165    | 1.405405405 |
| HNMT4          | 3.50E-40 | 1.144468  | 0.531 | 0.292 | 8.43E-36 | 3 HNMT       | 1.818493151 |
| RP11-556O9.22  | 4.14E-40 | 0.1996466 | 0.075 | 0.01  | 9.99E-36 | 3 RP11-556O  | 7.5         |
| CERS3-AS11     | 5.61E-40 | 0.1688889 | 0.046 | 0.004 | 1.35E-35 | 3 CERS3-AS1  | 11.5        |
| SRD5A32        | 7.96E-40 | 0.6729288 | 0.222 | 0.068 | 1.92E-35 | 3 SRD5A3     | 3.264705882 |
| RP11-355F16.12 | 9.20E-40 | 0.2711386 | 0.054 | 0.005 | 2.22E-35 | 3 RP11-355F  | 10.8        |
| S100P3         | 3.69E-39 | 0.6088557 | 0.188 | 0.051 | 8.91E-35 | 3 S100P      | 3.68627451  |
| KCNE43         | 1.03E-38 | 0.4004439 | 0.134 | 0.029 | 2.49E-34 | 3 KCNE4      | 4.620689655 |
| LINC013442     | 1.22E-38 | 0.7633071 | 0.14  | 0.032 | 2.94E-34 | 3 LINC01344  | 4.375       |
| TNFSF104       | 2.06E-38 | 1.361422  | 0.665 | 0.469 | 4.97E-34 | 3 TNFSF10    | 1.417910448 |
| SLC4A74        | 4.26E-38 | 1.085329  | 0.51  | 0.276 | 1.03E-33 | 3 SLC4A7     | 1.847826087 |
| CSGALNACT13    | 7.93E-38 | 1.029001  | 0.4   | 0.182 | 1.91E-33 | 3 CSGALNAC   | 2.197802198 |
| CYP1B13        | 1.30E-37 | 1.7428    | 0.287 | 0.112 | 3.15E-33 | 3 CYP1B1     | 2.5625      |
| C15orf483      | 2.17E-37 | 1.476702  | 0.701 | 0.495 | 5.24E-33 | 3 C15orf48   | 1.416161616 |
| RUNX22         | 4.76E-37 | 0.2897939 | 0.113 | 0.022 | 1.15E-32 | 3 RUNX2      | 5.136363636 |
| ANKRD30B3      | 6.41E-37 | 1.070137  | 0.1   | 0.018 | 1.55E-32 | 3 ANKRD30B   | 5.555555556 |
| PRDX13         | 2.51E-35 | 0.6840862 | 0.845 | 0.681 | 6.06E-31 | 3 PRDX1      | 1.24082232  |
| TMEM1565       | 1.69E-34 | 0.4752228 | 0.174 | 0.048 | 4.07E-30 | 3 TMEM156    | 3.625       |
| AC037445.12    | 4.68E-33 | 0.39927   | 0.182 | 0.053 | 1.13E-28 | 3 AC037445   | 3.433962264 |
| TRAFD14        | 4.56E-32 | 0.8582206 | 0.383 | 0.181 | 1.10E-27 | 3 TRAFD1     | 2.116022099 |
| NEAT15         | 8.17E-32 | 0.7865034 | 0.962 | 0.947 | 1.97E-27 | 3 NEAT1      | 1.015839493 |
| RHOBTB36       | 1.19E-30 | 0.578199  | 0.312 | 0.13  | 2.88E-26 | 3 RHOBTB3    | 2.4         |
| KIAA15514      | 7.94E-30 | 0.9343813 | 0.287 | 0.122 | 1.91E-25 | 3 KIAA1551   | 2.352459016 |
| HGD4           | 1.17E-29 | 0.2345114 | 0.084 | 0.016 | 2.81E-25 | 3 HGD        | 5.25        |
| CYP4Z11        | 1.55E-29 | 0.3748405 | 0.073 | 0.012 | 3.74E-25 | 3 CYP4Z1     | 6.083333333 |
| ORM2           | 3.31E-29 | 0.1374151 | 0.01  | 0     | 7.98E-25 | 3 ORM2       | #DIV/0!     |
| NEK103         | 5.37E-29 | 0.834497  | 0.326 | 0.148 | 1.29E-24 | 3 NEK10      | 2.202702703 |
| AP004372.13    | 1.68E-28 | 0.194273  | 0.065 | 0.01  | 4.05E-24 | 3 AP004372   | 6.5         |
| PIEZO2         | 1.84E-28 | 0.2463131 | 0.077 | 0.014 | 4.43E-24 | 3 PIEZO2     | 5.5         |
| BCAP293        | 8.13E-28 | 0.5354097 | 0.328 | 0.148 | 1.96E-23 | 3 BCAP29     | 2.216216216 |
| RP11-693J15.6  | 9.25E-28 | 0.1067084 | 0.015 | 0     | 2.23E-23 | 3 RP11-693J1 | #DIV/0!     |
| FRY2           | 2.72E-27 | 0.6973089 | 0.249 | 0.1   | 6.55E-23 | 3 FRY        | 2.49        |
| CCDC109B1      | 5.58E-26 | 0.3755785 | 0.197 | 0.07  | 1.35E-21 | 3 CCDC109B   | 2.814285714 |
| LINC008624     | 6.24E-26 | 0.3568159 | 0.136 | 0.039 | 1.50E-21 | 3 LINC00862  | 3.487179487 |
| ANKRD36C3      | 2.09E-25 | 1.019846  | 0.636 | 0.455 | 5.04E-21 | 3 ANKRD36C   | 1.397802198 |
| PON31          | 2.84E-25 | 0.1122715 | 0.04  | 0.005 | 6.85E-21 | 3 PON3       | 8           |
| PDLIM12        | 1.15E-24 | 0.4690102 | 0.274 | 0.119 | 2.77E-20 | 3 PDLIM1     | 2.302521008 |
| ZNF7371        | 2.70E-24 | 0.2356684 | 0.092 | 0.021 | 6.51E-20 | 3 ZNF737     | 4.380952381 |
| NFIA2          | 2.71E-24 | 0.6132635 | 0.366 | 0.187 | 6.53E-20 | 3 NFIA       | 1.957219251 |
| SORD4          | 4.10E-24 | 0.3724734 | 0.117 | 0.032 | 9.89E-20 | 3 SORD       | 3.65625     |
| UGT2B111       | 4.31E-24 | 0.2378829 | 0.029 | 0.003 | 1.04E-19 | 3 UGT2B11    | 9.666666667 |

|               |          |           |       |       |          |             |             |
|---------------|----------|-----------|-------|-------|----------|-------------|-------------|
| HILPDA3       | 5.41E-24 | 1.188445  | 0.462 | 0.275 | 1.30E-19 | 3 HILPDA    | 1.68        |
| AMN12         | 1.91E-23 | 0.5379475 | 0.318 | 0.155 | 4.61E-19 | 3 AMN1      | 2.051612903 |
| MGAT4A3       | 2.14E-23 | 0.4189303 | 0.224 | 0.089 | 5.17E-19 | 3 MGAT4A    | 2.516853933 |
| LIN7A3        | 2.30E-23 | 0.3197067 | 0.144 | 0.045 | 5.55E-19 | 3 LIN7A     | 3.2         |
| SLC39A66      | 7.28E-23 | 0.7024435 | 0.496 | 0.3   | 1.76E-18 | 3 SLC39A6   | 1.653333333 |
| PLCL1         | 1.95E-22 | 0.378033  | 0.107 | 0.029 | 4.71E-18 | 3 PLCL1     | 3.689655172 |
| XBP13         | 2.29E-22 | 0.830628  | 0.577 | 0.388 | 5.53E-18 | 3 XBP1      | 1.487113402 |
| TENM31        | 5.74E-22 | 0.168854  | 0.084 | 0.019 | 1.38E-17 | 3 TENM3     | 4.421052632 |
| ABCA124       | 7.54E-22 | 0.2268355 | 0.09  | 0.022 | 1.82E-17 | 3 ABCA12    | 4.090909091 |
| NTS           | 9.76E-22 | 0.2636045 | 0.006 | 0     | 2.35E-17 | 3 NTS       | #DIV/0!     |
| TIMP13        | 9.78E-22 | 0.6280829 | 0.178 | 0.066 | 2.36E-17 | 3 TIMP1     | 2.696969697 |
| FGA           | 9.79E-22 | 0.1023182 | 0.006 | 0     | 2.36E-17 | 3 FGA       | #DIV/0!     |
| LURAP1L3      | 1.63E-21 | 0.5729697 | 0.429 | 0.245 | 3.93E-17 | 3 LURAP1L   | 1.751020408 |
| SC5D5         | 1.75E-21 | 0.5633439 | 0.347 | 0.181 | 4.22E-17 | 3 SC5D      | 1.917127072 |
| FSIP15        | 1.96E-21 | 0.3497944 | 0.151 | 0.051 | 4.72E-17 | 3 FSIP1     | 2.960784314 |
| ESRRG1        | 2.31E-21 | 0.4603827 | 0.155 | 0.054 | 5.57E-17 | 3 ESRRG     | 2.87037037  |
| SYTL24        | 2.38E-21 | 0.5497975 | 0.663 | 0.448 | 5.74E-17 | 3 SYTL2     | 1.479910714 |
| AR6           | 5.35E-21 | 0.3972877 | 0.324 | 0.158 | 1.29E-16 | 3 AR        | 2.050632911 |
| PNPLA33       | 1.09E-20 | 0.3209721 | 0.105 | 0.03  | 2.63E-16 | 3 PNPLA3    | 3.5         |
| TTC65         | 1.13E-20 | 0.4552144 | 0.339 | 0.172 | 2.73E-16 | 3 TTC6      | 1.970930233 |
| DHCR244       | 1.65E-20 | 0.5356308 | 0.343 | 0.185 | 3.97E-16 | 3 DHCR24    | 1.854054054 |
| RP11-15H20.72 | 4.16E-20 | 0.3065525 | 0.163 | 0.06  | 1.00E-15 | 3 RP11-15H2 | 2.716666667 |
| ZNF385B4      | 1.50E-19 | 0.2148306 | 0.077 | 0.019 | 3.62E-15 | 3 ZNF385B   | 4.052631579 |
| PRKAR2B2      | 1.51E-18 | 0.3771282 | 0.146 | 0.053 | 3.64E-14 | 3 PRKAR2B   | 2.754716981 |
| TCN12         | 3.23E-18 | 0.3905358 | 0.075 | 0.019 | 7.80E-14 | 3 TCN1      | 3.947368421 |
| SRI2          | 4.22E-18 | 0.7248583 | 0.209 | 0.093 | 1.02E-13 | 3 SRI       | 2.247311828 |
| IL24          | 4.27E-18 | 0.2252089 | 0.013 | 0.001 | 1.03E-13 | 3 IL24      | 13          |
| CERS65        | 4.36E-18 | 0.3730667 | 0.322 | 0.164 | 1.05E-13 | 3 CERS6     | 1.963414634 |
| HMOX11        | 4.36E-18 | 0.27079   | 0.14  | 0.05  | 1.05E-13 | 3 HMOX1     | 2.8         |
| PAPSS21       | 6.55E-18 | 0.4318091 | 0.1   | 0.03  | 1.58E-13 | 3 PAPSS2    | 3.333333333 |
| MARCH101      | 7.84E-18 | 0.1349184 | 0.046 | 0.008 | 1.89E-13 | 3 MARCH10   | 5.75        |
| STC23         | 2.29E-17 | 0.6138156 | 0.209 | 0.094 | 5.51E-13 | 3 STC2      | 2.223404255 |
| ADD35         | 2.66E-17 | 0.5075058 | 0.343 | 0.194 | 6.43E-13 | 3 ADD3      | 1.768041237 |
| GCLM3         | 2.98E-17 | 0.5683655 | 0.278 | 0.146 | 7.19E-13 | 3 GCLM      | 1.904109589 |
| MITF3         | 3.94E-17 | 0.2962434 | 0.103 | 0.032 | 9.50E-13 | 3 MITF      | 3.21875     |
| LINC012074    | 3.99E-17 | 0.2642216 | 0.105 | 0.033 | 9.61E-13 | 3 LINC01207 | 3.181818182 |
| ZNF3501       | 5.25E-17 | 0.2364924 | 0.115 | 0.039 | 1.27E-12 | 3 ZNF350    | 2.948717949 |
| ABCC114       | 8.08E-17 | 0.2158704 | 0.061 | 0.014 | 1.95E-12 | 3 ABCC11    | 4.357142857 |
| TSPAN55       | 1.52E-16 | 0.5121    | 0.49  | 0.306 | 3.66E-12 | 3 TSPAN5    | 1.60130719  |
| CA123         | 1.62E-16 | 0.5080086 | 0.464 | 0.295 | 3.91E-12 | 3 CA12      | 1.572881356 |
| ST8SIA64      | 1.67E-16 | 0.3587103 | 0.259 | 0.128 | 4.03E-12 | 3 ST8SIA6   | 2.0234375   |
| SEPP14        | 2.35E-16 | 0.7212309 | 0.464 | 0.31  | 5.66E-12 | 3 SEPP1     | 1.496774194 |
| OSGIN21       | 3.53E-16 | 0.3527267 | 0.151 | 0.06  | 8.52E-12 | 3 OSGIN2    | 2.516666667 |
| S100A63       | 6.36E-16 | 0.7378059 | 0.383 | 0.58  | 1.53E-11 | 3 S100A6    | 0.660344828 |
| COPZ14        | 9.67E-16 | 0.4259755 | 0.487 | 0.319 | 2.33E-11 | 3 COPZ1     | 1.526645768 |
| CERS43        | 2.00E-15 | 0.1974934 | 0.098 | 0.032 | 4.82E-11 | 3 CERS4     | 3.0625      |
| GK1           | 2.45E-15 | 0.2443442 | 0.132 | 0.05  | 5.91E-11 | 3 GK        | 2.64        |
| PDZK12        | 6.52E-15 | 0.2806536 | 0.079 | 0.024 | 1.57E-10 | 3 PDZK1     | 3.291666667 |
| TMSB106       | 8.79E-15 | 0.1864976 | 0.594 | 0.737 | 2.12E-10 | 3 TMSB10    | 0.805970149 |
| TSPAN82       | 1.19E-14 | 0.3567186 | 0.071 | 0.02  | 2.88E-10 | 3 TSPAN8    | 3.55        |
| SLC40A13      | 1.54E-14 | 0.1915443 | 0.075 | 0.022 | 3.72E-10 | 3 SLC40A1   | 3.409090909 |
| CTA-392E5.13  | 1.67E-14 | 0.307288  | 0.096 | 0.032 | 4.03E-10 | 3 CTA-392E5 | 3           |

|                |          |           |       |       |          |              |             |
|----------------|----------|-----------|-------|-------|----------|--------------|-------------|
| SHTN12         | 3.87E-14 | 0.3625179 | 0.245 | 0.128 | 9.34E-10 | 3 SHTN1      | 1.9140625   |
| CAPN85         | 4.00E-14 | 0.3927491 | 0.368 | 0.217 | 9.65E-10 | 3 CAPN8      | 1.695852535 |
| DGKD5          | 4.97E-14 | 0.2943235 | 0.243 | 0.123 | 1.20E-09 | 3 DGKD       | 1.975609756 |
| SLC41A24       | 8.91E-14 | 0.3366756 | 0.232 | 0.118 | 2.15E-09 | 3 SLC41A2    | 1.966101695 |
| TGFB23         | 9.70E-14 | 1.058376  | 0.305 | 0.187 | 2.34E-09 | 3 TGFB2      | 1.631016043 |
| LETM21         | 1.10E-13 | 0.1243214 | 0.036 | 0.007 | 2.66E-09 | 3 LETM2      | 5.142857143 |
| ZNF2172        | 1.20E-13 | 0.4674831 | 0.316 | 0.183 | 2.88E-09 | 3 ZNF217     | 1.726775956 |
| KMO2           | 1.25E-13 | 0.2218273 | 0.082 | 0.026 | 3.02E-09 | 3 KMO        | 3.153846154 |
| ERN14          | 1.34E-13 | 0.4565947 | 0.28  | 0.157 | 3.22E-09 | 3 ERN1       | 1.78343949  |
| BLVRA1         | 1.96E-13 | 0.3466633 | 0.203 | 0.101 | 4.73E-09 | 3 BLVRA      | 2.00990099  |
| RP11-563J2.23  | 2.19E-13 | 0.1405012 | 0.054 | 0.014 | 5.27E-09 | 3 RP11-563J2 | 3.857142857 |
| RALGAPA22      | 2.44E-13 | 0.4146743 | 0.4   | 0.257 | 5.88E-09 | 3 RALGAPA2   | 1.556420233 |
| VMP13          | 2.84E-13 | 0.3474678 | 0.841 | 0.746 | 6.84E-09 | 3 VMP1       | 1.127345845 |
| CYB5A5         | 5.39E-13 | 0.5407299 | 0.406 | 0.257 | 1.30E-08 | 3 CYB5A      | 1.579766537 |
| PAPD53         | 6.27E-13 | 0.3034328 | 0.142 | 0.061 | 1.51E-08 | 3 PAPD5      | 2.327868852 |
| ZNF662         | 7.45E-13 | 0.2116383 | 0.09  | 0.031 | 1.80E-08 | 3 ZNF66      | 2.903225806 |
| IDH22          | 1.07E-12 | 0.2717167 | 0.165 | 0.077 | 2.57E-08 | 3 IDH2       | 2.142857143 |
| CHCHD74        | 1.57E-12 | 0.2564564 | 0.178 | 0.085 | 3.79E-08 | 3 CHCHD7     | 2.094117647 |
| FN16           | 1.68E-12 | 0.1926512 | 0.084 | 0.028 | 4.05E-08 | 3 FN1        | 3           |
| AKR1C13        | 1.86E-12 | 0.9209508 | 0.155 | 0.072 | 4.49E-08 | 3 AKR1C1     | 2.152777778 |
| UGDH4          | 1.91E-12 | 0.3025128 | 0.389 | 0.235 | 4.60E-08 | 3 UGDH       | 1.655319149 |
| DIRAS31        | 1.93E-12 | 0.1153532 | 0.023 | 0.003 | 4.66E-08 | 3 DIRAS3     | 7.666666667 |
| ZNF2814        | 2.02E-12 | 0.3364141 | 0.222 | 0.116 | 4.88E-08 | 3 ZNF281     | 1.913793103 |
| TMEM167A2      | 2.14E-12 | 0.3911209 | 0.404 | 0.262 | 5.16E-08 | 3 TMEM167A   | 1.541984733 |
| GNB42          | 3.00E-12 | 0.1192135 | 0.059 | 0.016 | 7.23E-08 | 3 GNB4       | 3.6875      |
| STEAP43        | 3.15E-12 | 0.233968  | 0.092 | 0.033 | 7.59E-08 | 3 STEAP4     | 2.787878788 |
| ABCC33         | 4.34E-12 | 0.3025956 | 0.172 | 0.082 | 1.05E-07 | 3 ABCC3      | 2.097560976 |
| RP11-356O9.12  | 4.42E-12 | 0.137145  | 0.04  | 0.009 | 1.07E-07 | 3 RP11-356O  | 4.444444444 |
| LMO74          | 4.67E-12 | 0.4259014 | 0.308 | 0.184 | 1.13E-07 | 3 LMO7       | 1.673913043 |
| PLAT6          | 4.71E-12 | 0.3205251 | 0.178 | 0.086 | 1.14E-07 | 3 PLAT       | 2.069767442 |
| OLMALINC2      | 5.45E-12 | 0.2124355 | 0.109 | 0.043 | 1.31E-07 | 3 OLMALINC   | 2.534883721 |
| NPR32          | 1.44E-11 | 0.2182098 | 0.048 | 0.012 | 3.48E-07 | 3 NPR3       | 4           |
| AFMID2         | 1.47E-11 | 0.392612  | 0.224 | 0.123 | 3.55E-07 | 3 AFMID      | 1.821138211 |
| ECHDC23        | 2.30E-11 | 0.2822248 | 0.222 | 0.12  | 5.54E-07 | 3 ECHDC2     | 1.85        |
| DUSP166        | 2.83E-11 | 0.3250692 | 0.567 | 0.42  | 6.83E-07 | 3 DUSP16     | 1.35        |
| KIAA19583      | 3.44E-11 | 0.2730511 | 0.249 | 0.139 | 8.30E-07 | 3 KIAA1958   | 1.791366906 |
| TMEM596        | 3.73E-11 | 0.3500831 | 0.596 | 0.451 | 9.00E-07 | 3 TMEM59     | 1.321507761 |
| ZRSR21         | 5.00E-11 | 0.1793943 | 0.142 | 0.064 | 1.20E-06 | 3 ZRSR2      | 2.21875     |
| FNIP25         | 5.33E-11 | 0.2891466 | 0.203 | 0.107 | 1.29E-06 | 3 FNIP2      | 1.897196262 |
| CHMP55         | 7.92E-11 | 0.3629082 | 0.569 | 0.435 | 1.91E-06 | 3 CHMP5      | 1.308045977 |
| ATP6V1G13      | 9.79E-11 | 0.4229153 | 0.527 | 0.388 | 2.36E-06 | 3 ATP6V1G1   | 1.358247423 |
| RP11-545E17.32 | 1.18E-10 | 0.1254908 | 0.054 | 0.016 | 2.84E-06 | 3 RP11-545E  | 3.375       |
| FGFR22         | 1.19E-10 | 0.1155226 | 0.069 | 0.023 | 2.86E-06 | 3 FGFR2      | 3           |
| MXD14          | 2.74E-10 | 0.3829187 | 0.331 | 0.211 | 6.60E-06 | 3 MXD1       | 1.568720379 |
| PLAG11         | 2.93E-10 | 0.1097436 | 0.042 | 0.011 | 7.06E-06 | 3 PLAG1      | 3.818181818 |
| ANGPTL42       | 3.22E-10 | 0.1911312 | 0.071 | 0.025 | 7.76E-06 | 3 ANGPTL4    | 2.84        |
| SDR16C52       | 3.68E-10 | 0.2957549 | 0.174 | 0.088 | 8.88E-06 | 3 SDR16C5    | 1.977272727 |
| BORCS51        | 3.97E-10 | 0.221145  | 0.138 | 0.065 | 9.58E-06 | 3 BORCS5     | 2.123076923 |
| SNRPG4         | 4.19E-10 | 0.4532118 | 0.632 | 0.516 | 1.01E-05 | 3 SNRPG      | 1.224806202 |
| MRPL272        | 4.48E-10 | 0.2988864 | 0.297 | 0.183 | 1.08E-05 | 3 MRPL27     | 1.62295082  |
| NUCB24         | 5.50E-10 | 0.3096356 | 0.226 | 0.128 | 1.33E-05 | 3 NUCB2      | 1.765625    |
| CTPS23         | 5.74E-10 | 0.2990546 | 0.142 | 0.07  | 1.38E-05 | 3 CTPS2      | 2.028571429 |

|                |          |           |       |       |             |   |           |             |
|----------------|----------|-----------|-------|-------|-------------|---|-----------|-------------|
| UBE2L34        | 5.80E-10 | 0.3383107 | 0.567 | 0.437 | 1.40E-05    | 3 | UBE2L3    | 1.297482838 |
| ZNF1073        | 6.75E-10 | 0.2421717 | 0.176 | 0.092 | 1.63E-05    | 3 | ZNF107    | 1.913043478 |
| ADAMTS172      | 7.31E-10 | 0.1494898 | 0.075 | 0.027 | 1.76E-05    | 3 | ADAMTS17  | 2.777777778 |
| SLC7A26        | 7.83E-10 | 0.2927154 | 0.446 | 0.299 | 1.89E-05    | 3 | SLC7A2    | 1.491638796 |
| HAT13          | 8.82E-10 | 0.2823891 | 0.31  | 0.192 | 2.13E-05    | 3 | HAT1      | 1.614583333 |
| MORF4L25       | 8.88E-10 | 0.3287782 | 0.814 | 0.741 | 2.14E-05    | 3 | MORF4L2   | 1.09851552  |
| DDHD12         | 1.16E-09 | 0.1593418 | 0.096 | 0.04  | 2.80E-05    | 3 | DDHD1     | 2.4         |
| HMGCS13        | 1.26E-09 | 0.6308706 | 0.345 | 0.239 | 3.03E-05    | 3 | HMGCS1    | 1.443514644 |
| C20orf2031     | 1.31E-09 | 0.4031852 | 0.04  | 0.01  | 3.17E-05    | 3 | C20orf203 | 4           |
| C9orf843       | 1.51E-09 | 0.2932654 | 0.136 | 0.067 | 3.65E-05    | 3 | C9orf84   | 2.029850746 |
| FHL25          | 1.68E-09 | 0.3178681 | 0.276 | 0.171 | 4.05E-05    | 3 | FHL2      | 1.614035088 |
| RPL36AL3       | 1.72E-09 | 0.250821  | 0.916 | 0.886 | 4.15E-05    | 3 | RPL36AL   | 1.033860045 |
| CTD-2626G11.24 | 1.82E-09 | 0.2449353 | 0.105 | 0.046 | 4.38E-05    | 3 | CTD-2626G | 2.282608696 |
| C4orf34        | 1.87E-09 | 0.3893091 | 0.644 | 0.534 | 4.51E-05    | 3 | C4orf3    | 1.205992509 |
| FAM69A3        | 1.96E-09 | 0.4061201 | 0.172 | 0.091 | 4.72E-05    | 3 | FAM69A    | 1.89010989  |
| PBX34          | 2.19E-09 | 0.298715  | 0.169 | 0.089 | 5.28E-05    | 3 | PBX3      | 1.898876404 |
| MTHFD25        | 2.49E-09 | 0.2813255 | 0.224 | 0.13  | 5.99E-05    | 3 | MTHFD2    | 1.723076923 |
| MMP102         | 2.63E-09 | 0.1980465 | 0.029 | 0.006 | 6.35E-05    | 3 | MMP10     | 4.833333333 |
| RALGPS23       | 3.05E-09 | 0.2742559 | 0.427 | 0.294 | 7.35E-05    | 3 | RALGPS2   | 1.452380952 |
| CTD-2015H6.33  | 3.06E-09 | 0.2015472 | 0.132 | 0.064 | 7.37E-05    | 3 | CTD-2015H | 2.0625      |
| YIPF62         | 3.08E-09 | 0.3122507 | 0.293 | 0.185 | 7.43E-05    | 3 | YIPF6     | 1.583783784 |
| IRX33          | 3.64E-09 | 0.2605301 | 0.169 | 0.09  | 8.79E-05    | 3 | IRX3      | 1.877777778 |
| EPS15L13       | 3.76E-09 | 0.244213  | 0.157 | 0.082 | 9.06E-05    | 3 | EPS15L1   | 1.914634146 |
| ATP6V1E12      | 3.91E-09 | 0.3177275 | 0.414 | 0.292 | 9.42E-05    | 3 | ATP6V1E1  | 1.417808219 |
| EMC35          | 4.02E-09 | 0.2616403 | 0.356 | 0.235 | 9.68E-05    | 3 | EMC3      | 1.514893617 |
| LRR67          | 4.83E-09 | 0.194421  | 0.1   | 0.044 | 0.000116561 | 3 | LRR6      | 2.272727273 |
| SLC31A12       | 4.93E-09 | 0.215938  | 0.218 | 0.125 | 0.00011888  | 3 | SLC31A1   | 1.744       |
| IGBP13         | 5.01E-09 | 0.2988923 | 0.523 | 0.394 | 0.000120892 | 3 | IGBP1     | 1.327411168 |
| TAF123         | 6.49E-09 | 0.2166702 | 0.188 | 0.104 | 0.000156423 | 3 | TAF12     | 1.807692308 |
| RUFY33         | 6.95E-09 | 0.2782766 | 0.362 | 0.238 | 0.000167521 | 3 | RUFY3     | 1.521008403 |
| NBN2           | 7.31E-09 | 0.2166614 | 0.111 | 0.051 | 0.000176171 | 3 | NBN       | 2.176470588 |
| PON23          | 7.92E-09 | 0.2022653 | 0.172 | 0.092 | 0.000191051 | 3 | PON2      | 1.869565217 |
| MREG4          | 8.24E-09 | 0.2442213 | 0.238 | 0.14  | 0.000198598 | 3 | MREG      | 1.7         |
| LLPH4          | 8.33E-09 | 0.2286305 | 0.213 | 0.124 | 0.000200869 | 3 | LLPH      | 1.717741935 |
| ELP24          | 8.43E-09 | 0.3176384 | 0.322 | 0.214 | 0.000203251 | 3 | ELP2      | 1.504672897 |
| RP11-519G16.33 | 8.73E-09 | 0.3213714 | 0.649 | 0.507 | 0.000210424 | 3 | RP11-519G | 1.280078895 |
| ACADSB6        | 9.83E-09 | 0.3148348 | 0.312 | 0.202 | 0.000236985 | 3 | ACADSB    | 1.544554455 |
| MIPOL15        | 1.07E-08 | 0.183207  | 0.297 | 0.183 | 0.000257358 | 3 | MIPOL1    | 1.62295082  |
| HES14          | 1.30E-08 | 0.4210744 | 0.458 | 0.341 | 0.000313338 | 3 | HES1      | 1.343108504 |
| PLIN23         | 1.41E-08 | 0.662403  | 0.169 | 0.094 | 0.0003388   | 3 | PLIN2     | 1.79787234  |
| LIMA12         | 1.73E-08 | 0.3467739 | 0.519 | 0.398 | 0.000417065 | 3 | LIMA1     | 1.304020101 |
| SCD3           | 1.84E-08 | 0.2587055 | 0.211 | 0.124 | 0.000443064 | 3 | SCD       | 1.701612903 |
| SRP145         | 1.99E-08 | 0.2562712 | 0.923 | 0.873 | 0.000480929 | 3 | SRP14     | 1.057273769 |
| GPR137B3       | 2.05E-08 | 0.1349222 | 0.098 | 0.043 | 0.000495361 | 3 | GPR137B   | 2.279069767 |
| MPHOSPH63      | 2.35E-08 | 0.2646944 | 0.215 | 0.128 | 0.000566478 | 3 | MPHOSPH6  | 1.6796875   |
| TTF14          | 2.42E-08 | 0.2109285 | 0.201 | 0.115 | 0.000584585 | 3 | TTF1      | 1.747826087 |
| TXNRD13        | 2.64E-08 | 0.3322427 | 0.506 | 0.376 | 0.00063741  | 3 | TXNRD1    | 1.345744681 |
| ASPH5          | 3.11E-08 | 0.308407  | 0.4   | 0.284 | 0.000748742 | 3 | ASPH      | 1.408450704 |
| CLOCK3         | 3.33E-08 | 0.2912256 | 0.31  | 0.207 | 0.000802528 | 3 | CLOCK     | 1.497584541 |
| CPB13          | 3.53E-08 | 0.3880019 | 0.029 | 0.007 | 0.000851774 | 3 | CPB1      | 4.142857143 |
| RP11-597D13.92 | 3.73E-08 | 0.102392  | 0.025 | 0.006 | 0.000899323 | 3 | RP11-597D | 4.166666667 |
| IFT882         | 3.95E-08 | 0.236081  | 0.121 | 0.06  | 0.000951606 | 3 | IFT88     | 2.016666667 |

|                |          |           |       |       |             |             |             |
|----------------|----------|-----------|-------|-------|-------------|-------------|-------------|
| MTIF34         | 4.21E-08 | 0.2776721 | 0.381 | 0.271 | 0.001014185 | 3 MTIF3     | 1.405904059 |
| ADCY11         | 4.25E-08 | 0.1220474 | 0.05  | 0.017 | 0.00102577  | 3 ADCY1     | 2.941176471 |
| PRKAA13        | 4.33E-08 | 0.253753  | 0.314 | 0.207 | 0.001043963 | 3 PRKAA1    | 1.516908213 |
| CHD1L1         | 5.91E-08 | 0.2218937 | 0.103 | 0.048 | 0.001425577 | 3 CHD1L     | 2.145833333 |
| AIM14          | 7.56E-08 | 0.2656703 | 0.575 | 0.445 | 0.001822251 | 3 AIM1      | 1.292134831 |
| FBXO363        | 8.21E-08 | 0.1552675 | 0.111 | 0.053 | 0.00198005  | 3 FBXO36    | 2.094339623 |
| DNAJB112       | 8.69E-08 | 0.2953088 | 0.278 | 0.183 | 0.002095114 | 3 DNAJB11   | 1.519125683 |
| MAML33         | 9.14E-08 | 0.2387307 | 0.469 | 0.35  | 0.002203055 | 3 MAML3     | 1.34        |
| B4GALNT31      | 9.58E-08 | 0.1559269 | 0.092 | 0.042 | 0.002309871 | 3 B4GALNT3  | 2.19047619  |
| ZMYND83        | 1.08E-07 | 0.3981114 | 0.441 | 0.335 | 0.002594122 | 3 ZMYND8    | 1.31641791  |
| LIMCH14        | 1.27E-07 | 0.2837365 | 0.623 | 0.486 | 0.003065457 | 3 LIMCH1    | 1.281893004 |
| CH17-189H20.12 | 1.30E-07 | 0.2157256 | 0.163 | 0.092 | 0.003137489 | 3 CH17-189H | 1.77173913  |
| AFF13          | 1.35E-07 | 0.255353  | 0.494 | 0.373 | 0.00326073  | 3 AFF1      | 1.324396783 |
| STARD134       | 1.46E-07 | 0.3342088 | 0.299 | 0.201 | 0.003508881 | 3 STARD13   | 1.487562189 |
| MPP75          | 1.56E-07 | 0.2335357 | 0.199 | 0.116 | 0.003758346 | 3 MPP7      | 1.715517241 |
| CCDC643        | 1.60E-07 | 0.1971247 | 0.111 | 0.055 | 0.00384897  | 3 CCDC64    | 2.018181818 |
| SRRM12         | 1.70E-07 | 0.3193697 | 0.634 | 0.535 | 0.004104553 | 3 SRRM1     | 1.185046729 |
| CROT3          | 1.73E-07 | 0.1386174 | 0.096 | 0.045 | 0.004172859 | 3 CROT      | 2.133333333 |
| PLOD23         | 1.78E-07 | 0.4598724 | 0.335 | 0.238 | 0.004289988 | 3 PLOD2     | 1.407563025 |
| POLR2K3        | 1.83E-07 | 0.243487  | 0.498 | 0.368 | 0.004405182 | 3 POLR2K    | 1.35326087  |
| LYRM13         | 2.04E-07 | 0.1995339 | 0.161 | 0.091 | 0.004910945 | 3 LYRM1     | 1.769230769 |
| HOXA91         | 2.04E-07 | 0.1193376 | 0.067 | 0.027 | 0.004926931 | 3 HOXA9     | 2.481481481 |
| ALB1           | 2.18E-07 | 0.2393225 | 0.017 | 0.003 | 0.005248672 | 3 ALB       | 5.666666667 |
| SLC7A62        | 2.36E-07 | 0.1431426 | 0.073 | 0.031 | 0.005682682 | 3 SLC7A6    | 2.35483871  |
| GOLT1B2        | 2.68E-07 | 0.223523  | 0.228 | 0.143 | 0.006451798 | 3 GOLT1B    | 1.594405594 |
| SBNO14         | 3.15E-07 | 0.2340174 | 0.238 | 0.151 | 0.007586937 | 3 SBNO1     | 1.57615894  |
| COX203         | 3.32E-07 | 0.2397159 | 0.218 | 0.135 | 0.00800063  | 3 COX20     | 1.614814815 |
| HPS33          | 3.98E-07 | 0.1562586 | 0.092 | 0.043 | 0.009588421 | 3 HPS3      | 2.139534884 |
| HIST1H4H4      | 4.05E-07 | 0.2802326 | 0.138 | 0.076 | 0.009766715 | 3 HIST1H4H  | 1.815789474 |
| EIF4G34        | 4.14E-07 | 0.1846084 | 0.64  | 0.51  | 0.009977274 | 3 EIF4G3    | 1.254901961 |
| COPB21         | 4.43E-07 | 0.2524084 | 0.285 | 0.189 | 0.01069101  | 3 COPB2     | 1.507936508 |
| DLC13          | 4.47E-07 | 0.2198815 | 0.123 | 0.065 | 0.01079054  | 3 DLC1      | 1.892307692 |
| TTC39B4        | 4.53E-07 | 0.2133965 | 0.159 | 0.091 | 0.01093414  | 3 TTC39B    | 1.747252747 |
| PLD14          | 4.66E-07 | 0.3305363 | 0.207 | 0.129 | 0.01122779  | 3 PLD1      | 1.604651163 |
| ACER23         | 5.01E-07 | 0.1951554 | 0.098 | 0.048 | 0.01207061  | 3 ACER2     | 2.041666667 |
| ZG16B3         | 5.29E-07 | 0.1255303 | 0.061 | 0.024 | 0.01276448  | 3 ZG16B     | 2.541666667 |
| C9orf1524      | 5.94E-07 | 0.256523  | 0.096 | 0.047 | 0.01433341  | 3 C9orf152  | 2.042553191 |
| BZW14          | 6.13E-07 | 0.1711991 | 0.395 | 0.276 | 0.01479285  | 3 BZW1      | 1.43115942  |
| FGFR13         | 6.36E-07 | 0.2832075 | 0.285 | 0.192 | 0.01533646  | 3 FGFR1     | 1.484375    |
| DPCD2          | 6.38E-07 | 0.1823098 | 0.149 | 0.083 | 0.01538693  | 3 DPCD      | 1.795180723 |
| HN1L2          | 6.42E-07 | 0.1738847 | 0.14  | 0.077 | 0.01547631  | 3 HN1L      | 1.818181818 |
| ARPC34         | 6.53E-07 | 0.2681822 | 0.745 | 0.66  | 0.01575377  | 3 ARPC3     | 1.128787879 |
| CFB3           | 6.93E-07 | 0.4967496 | 0.232 | 0.154 | 0.01671426  | 3 CFB       | 1.506493506 |
| IFITM22        | 7.57E-07 | 0.4678666 | 0.146 | 0.083 | 0.01825645  | 3 IFITM2    | 1.759036145 |
| EFHD16         | 7.98E-07 | 0.1908389 | 0.423 | 0.299 | 0.01923913  | 3 EFHD1     | 1.414715719 |
| SS18L23        | 9.43E-07 | 0.1836037 | 0.228 | 0.144 | 0.02273373  | 3 SS18L2    | 1.583333333 |
| SHFM13         | 9.48E-07 | 0.2908737 | 0.713 | 0.626 | 0.02286485  | 3 SHFM1     | 1.138977636 |
| CPD4           | 1.06E-06 | 0.1748376 | 0.349 | 0.239 | 0.02554034  | 3 CPD       | 1.460251046 |
| POMP4          | 1.11E-06 | 0.2149592 | 0.738 | 0.63  | 0.02673693  | 3 POMP      | 1.171428571 |
| CAPN134        | 1.22E-06 | 0.1256999 | 0.082 | 0.038 | 0.02953169  | 3 CAPN13    | 2.157894737 |
| ZNF1002        | 1.24E-06 | 0.1199986 | 0.077 | 0.035 | 0.02983723  | 3 ZNF100    | 2.2         |
| CA25           | 1.43E-06 | 0.2225823 | 0.157 | 0.091 | 0.03452048  | 3 CA2       | 1.725274725 |

|               |           |           |       |       |            |             |             |
|---------------|-----------|-----------|-------|-------|------------|-------------|-------------|
| PRELID3B2     | 1.44E-06  | 0.2546262 | 0.335 | 0.239 | 0.03467763 | 3 PRELID3B  | 1.40167364  |
| CENPP1        | 1.52E-06  | 0.2412666 | 0.113 | 0.06  | 0.03662691 | 3 CENPP     | 1.883333333 |
| ACTL6A3       | 1.64E-06  | 0.154887  | 0.126 | 0.068 | 0.03963308 | 3 ACTL6A    | 1.852941176 |
| TNIK5         | 1.69E-06  | 0.1340554 | 0.249 | 0.161 | 0.04073089 | 3 TNIK      | 1.546583851 |
| DUSP55        | 1.91E-06  | 0.1804408 | 0.343 | 0.237 | 0.04605012 | 3 DUSP5     | 1.447257384 |
| SRGN1         | 0         | 4.623162  | 0.589 | 0.023 | 0          | 0 SRGN      | 25.60869565 |
| IL1B          | 0         | 3.137399  | 0.212 | 0.002 | 0          | 0 IL1B      | 106         |
| FCER1G        | 0         | 3.01144   | 0.356 | 0.002 | 0          | 0 FCER1G    | 178         |
| RGS1          | 0         | 2.727623  | 0.288 | 0.004 | 0          | 0 RGS1      | 72          |
| CYTIP2        | 0         | 2.439028  | 0.356 | 0.007 | 0          | 0 CYTIP     | 50.85714286 |
| TCF4          | 0         | 2.38423   | 0.384 | 0.007 | 0          | 0 TCF4      | 54.85714286 |
| ZEB2          | 0         | 2.296144  | 0.315 | 0.001 | 0          | 0 ZEB2      | 315         |
| HLA-DQA11     | 0         | 2.181689  | 0.329 | 0.005 | 0          | 0 HLA-DQA1  | 65.8        |
| GPR183        | 0         | 1.753111  | 0.26  | 0.002 | 0          | 0 GPR183    | 130         |
| FGL2          | 0         | 1.744689  | 0.199 | 0     | 0          | 0 FGL2      | #DIV/0!     |
| PTPRC         | 0         | 1.601916  | 0.199 | 0.001 | 0          | 0 PTPRC     | 199         |
| CD53          | 0         | 1.481391  | 0.226 | 0.001 | 0          | 0 CD53      | 226         |
| HLA-DPB1      | 0         | 1.37406   | 0.253 | 0.004 | 0          | 0 HLA-DPB1  | 63.25       |
| HLA-DPA1      | 0         | 1.269555  | 0.205 | 0.002 | 0          | 0 HLA-DPA1  | 102.5       |
| NRP2          | 0         | 1.26448   | 0.226 | 0.002 | 0          | 0 NRP2      | 113         |
| PLEK          | 0         | 1.040968  | 0.116 | 0     | 0          | 0 PLEK      | #DIV/0!     |
| OLR1          | 0         | 0.6824914 | 0.096 | 0     | 0          | 0 OLR1      | #DIV/0!     |
| GIMAP4        | 0         | 0.6468897 | 0.082 | 0     | 0          | 0 GIMAP4    | #DIV/0!     |
| MS4A6A        | 0         | 0.5735986 | 0.123 | 0     | 0          | 0 MS4A6A    | #DIV/0!     |
| CD93          | 0         | 0.4492098 | 0.075 | 0     | 0          | 0 CD93      | #DIV/0!     |
| MMP19         | 0         | 0.3495196 | 0.082 | 0     | 0          | 0 MMP19     | #DIV/0!     |
| PIK3R5        | 1.04E-303 | 1.52811   | 0.199 | 0.003 | 2.50E-299  | 0 PIK3R5    | 66.33333333 |
| A2M           | 3.25E-292 | 1.3512    | 0.205 | 0.003 | 7.83E-288  | 0 A2M       | 68.33333333 |
| CD163         | 2.57E-280 | 0.7423169 | 0.096 | 0     | 6.20E-276  | 0 CD163     | #DIV/0!     |
| SLC2A31       | 1.74E-276 | 1.532577  | 0.205 | 0.003 | 4.21E-272  | 0 SLC2A3    | 68.33333333 |
| CLECL1        | 6.57E-271 | 0.449916  | 0.082 | 0     | 1.58E-266  | 0 CLECL1    | #DIV/0!     |
| HLA-DRB51     | 7.77E-265 | 1.40195   | 0.267 | 0.006 | 1.87E-260  | 0 HLA-DRB5  | 44.5        |
| CHST111       | 8.57E-253 | 1.574951  | 0.308 | 0.009 | 2.07E-248  | 0 CHST11    | 34.22222222 |
| ENTPD1        | 8.75E-253 | 1.15992   | 0.219 | 0.004 | 2.11E-248  | 0 ENTPD1    | 54.75       |
| LAPTM5        | 1.46E-240 | 0.5412252 | 0.082 | 0     | 3.52E-236  | 0 LAPTM5    | #DIV/0!     |
| CXorf21       | 6.40E-232 | 0.3053523 | 0.068 | 0     | 1.54E-227  | 0 CXorf21   | #DIV/0!     |
| C5AR11        | 5.41E-227 | 1.105747  | 0.205 | 0.004 | 1.31E-222  | 0 C5AR1     | 51.25       |
| RP11-556E13.1 | 9.35E-226 | 1.683701  | 0.185 | 0.003 | 2.26E-221  | 0 RP11-556E | 61.66666667 |
| TLR4          | 4.23E-202 | 0.5944297 | 0.075 | 0     | 1.02E-197  | 0 TLR4      | #DIV/0!     |
| IL2RG         | 5.34E-202 | 0.4313662 | 0.075 | 0     | 1.29E-197  | 0 IL2RG     | #DIV/0!     |
| ATP8B42       | 3.60E-194 | 2.082921  | 0.267 | 0.009 | 8.67E-190  | 0 ATP8B4    | 29.66666667 |
| CSF2RA3       | 1.33E-188 | 2.208554  | 0.336 | 0.016 | 3.21E-184  | 0 CSF2RA    | 21          |
| FCGR2A        | 1.94E-186 | 0.7806454 | 0.171 | 0.004 | 4.68E-182  | 0 FCGR2A    | 42.75       |
| GIMAP7        | 4.73E-182 | 0.369346  | 0.041 | 0     | 1.14E-177  | 0 GIMAP7    | #DIV/0!     |
| EVI2B         | 4.73E-182 | 0.2082456 | 0.041 | 0     | 1.14E-177  | 0 EVI2B     | #DIV/0!     |
| CD80          | 1.71E-180 | 0.6324722 | 0.089 | 0.001 | 4.13E-176  | 0 CD80      | 89          |
| HLA-DRA2      | 4.21E-169 | 4.784841  | 0.671 | 0.078 | 1.02E-164  | 0 HLA-DRA   | 8.602564103 |
| ALOX5AP       | 1.93E-168 | 1.039507  | 0.164 | 0.004 | 4.64E-164  | 0 ALOX5AP   | 41          |
| EPB41L31      | 2.60E-168 | 2.089122  | 0.315 | 0.015 | 6.26E-164  | 0 EPB41L3   | 21          |
| IL7R          | 5.68E-167 | 1.112889  | 0.068 | 0     | 1.37E-162  | 0 IL7R      | #DIV/0!     |
| CD300E        | 4.45E-158 | 0.5417141 | 0.068 | 0     | 1.07E-153  | 0 CD300E    | #DIV/0!     |
| TYROBP        | 5.29E-158 | 0.4838393 | 0.068 | 0     | 1.27E-153  | 0 TYROBP    | #DIV/0!     |

|           |           |           |       |       |           |            |             |
|-----------|-----------|-----------|-------|-------|-----------|------------|-------------|
| HLA-DRB12 | 5.44E-155 | 2.480785  | 0.514 | 0.046 | 1.31E-150 | 0 HLA-DRB1 | 11.17391304 |
| SAMSN13   | 1.75E-154 | 2.617716  | 0.363 | 0.023 | 4.21E-150 | 0 SAMSN1   | 15.7826087  |
| SLAMF7    | 4.82E-152 | 0.3180138 | 0.034 | 0     | 1.16E-147 | 0 SLAMF7   | #DIV/0!     |
| NLRP3     | 1.75E-148 | 0.3379132 | 0.055 | 0     | 4.21E-144 | 0 NLRP3    | #DIV/0!     |
| GNG11     | 1.17E-134 | 0.4452416 | 0.048 | 0     | 2.83E-130 | 0 GNG11    | #DIV/0!     |
| FAM49A4   | 1.64E-133 | 1.716737  | 0.384 | 0.029 | 3.95E-129 | 0 FAM49A   | 13.24137931 |
| CD744     | 2.11E-130 | 2.797706  | 0.616 | 0.084 | 5.08E-126 | 0 CD74     | 7.333333333 |
| MSR1      | 7.12E-128 | 1.293163  | 0.219 | 0.01  | 1.72E-123 | 0 MSR1     | 21.9        |
| FCGR3A    | 1.09E-126 | 0.2472296 | 0.034 | 0     | 2.63E-122 | 0 FCGR3A   | #DIV/0!     |
| NCKAP1L   | 1.56E-121 | 0.3432529 | 0.062 | 0.001 | 3.77E-117 | 0 NCKAP1L  | 62          |
| PLA2G7    | 1.18E-115 | 0.3352033 | 0.062 | 0.001 | 2.85E-111 | 0 PLA2G7   | 62          |
| LAIR1     | 3.15E-113 | 0.2477091 | 0.055 | 0     | 7.59E-109 | 0 LAIR1    | #DIV/0!     |
| LUM       | 4.72E-109 | 0.7593702 | 0.041 | 0     | 1.14E-104 | 0 LUM      | #DIV/0!     |
| LILRB1    | 4.92E-109 | 0.234808  | 0.041 | 0     | 1.19E-104 | 0 LILRB1   | #DIV/0!     |
| CD86      | 7.08E-107 | 0.6932559 | 0.13  | 0.004 | 1.71E-102 | 0 CD86     | 32.5        |
| DCN       | 1.28E-105 | 0.9658774 | 0.048 | 0     | 3.09E-101 | 0 DCN      | #DIV/0!     |
| IL2RA1    | 1.32E-103 | 1.050096  | 0.178 | 0.008 | 3.19E-99  | 0 IL2RA    | 22.25       |
| SLC1A32   | 2.97E-101 | 1.946289  | 0.322 | 0.027 | 7.17E-97  | 0 SLC1A3   | 11.92592593 |
| CCL4L21   | 3.31E-101 | 0.8632973 | 0.055 | 0.001 | 7.99E-97  | 0 CCL4L2   | 55          |
| LST11     | 4.85E-101 | 0.3254388 | 0.062 | 0.001 | 1.17E-96  | 0 LST1     | 62          |
| IRAK33    | 8.65E-100 | 1.524381  | 0.267 | 0.019 | 2.09E-95  | 0 IRAK3    | 14.05263158 |
| MMP9      | 1.12E-97  | 0.1653317 | 0.027 | 0     | 2.71E-93  | 0 MMP9     | #DIV/0!     |
| WIPF12    | 5.60E-97  | 0.9587705 | 0.171 | 0.008 | 1.35E-92  | 0 WIPF1    | 21.375      |
| SPARC     | 5.92E-97  | 0.8562066 | 0.123 | 0.004 | 1.43E-92  | 0 SPARC    | 30.75       |
| LYZ1      | 8.75E-97  | 0.5478086 | 0.082 | 0.002 | 2.11E-92  | 0 LYZ      | 41          |
| CCL32     | 1.16E-95  | 1.307506  | 0.089 | 0.002 | 2.79E-91  | 0 CCL3     | 44.5        |
| NPL       | 2.50E-94  | 0.751061  | 0.144 | 0.006 | 6.04E-90  | 0 NPL      | 24          |
| MPP1      | 3.85E-93  | 0.56235   | 0.11  | 0.003 | 9.28E-89  | 0 MPP1     | 36.66666667 |
| COL1A2    | 5.29E-92  | 0.4325637 | 0.021 | 0     | 1.28E-87  | 0 COL1A2   | #DIV/0!     |
| C1QA      | 5.29E-92  | 0.2307629 | 0.021 | 0     | 1.28E-87  | 0 C1QA     | #DIV/0!     |
| FLI1      | 1.92E-88  | 0.4243697 | 0.082 | 0.002 | 4.64E-84  | 0 FLI1     | 41          |
| PAG1      | 5.10E-88  | 0.9056181 | 0.13  | 0.005 | 1.23E-83  | 0 PAG1     | 26          |
| SPARCL14  | 1.16E-85  | 3.087791  | 0.349 | 0.038 | 2.81E-81  | 0 SPARCL1  | 9.184210526 |
| HLA-DQA2  | 7.55E-83  | 0.5083902 | 0.096 | 0.003 | 1.82E-78  | 0 HLA-DQA2 | 32          |
| BCAT1     | 2.38E-82  | 0.6643369 | 0.11  | 0.004 | 5.73E-78  | 0 BCAT1    | 27.5        |
| GPNMB2    | 3.78E-82  | 0.769718  | 0.137 | 0.006 | 9.11E-78  | 0 GPNMB    | 22.83333333 |
| IGLC3     | 1.95E-81  | 2.48868   | 0.027 | 0     | 4.70E-77  | 0 IGLC3    | #DIV/0!     |
| MNDA      | 1.98E-81  | 0.2989229 | 0.027 | 0     | 4.78E-77  | 0 MNDA     | #DIV/0!     |
| CCR1      | 2.04E-81  | 0.1482718 | 0.027 | 0     | 4.92E-77  | 0 CCR1     | #DIV/0!     |
| SLAMF9    | 2.06E-81  | 0.1015458 | 0.027 | 0     | 4.96E-77  | 0 SLAMF9   | #DIV/0!     |
| LCP13     | 6.63E-76  | 0.9990032 | 0.205 | 0.015 | 1.60E-71  | 0 LCP1     | 13.66666667 |
| ERG       | 9.10E-76  | 1.052224  | 0.144 | 0.007 | 2.19E-71  | 0 ERG      | 20.57142857 |
| KCNK13    | 1.22E-72  | 0.3901474 | 0.082 | 0.002 | 2.93E-68  | 0 KCNK13   | 41          |
| ITGAX1    | 8.52E-71  | 0.3192039 | 0.055 | 0.001 | 2.05E-66  | 0 ITGAX    | 55          |
| IGSF6     | 9.63E-71  | 0.3127929 | 0.062 | 0.001 | 2.32E-66  | 0 IGSF6    | 62          |
| COL3A1    | 7.76E-70  | 1.122259  | 0.027 | 0     | 1.87E-65  | 0 COL3A1   | #DIV/0!     |
| CCR7      | 3.71E-69  | 0.1613686 | 0.021 | 0     | 8.94E-65  | 0 CCR7     | #DIV/0!     |
| AIF1      | 6.19E-68  | 0.4836825 | 0.041 | 0     | 1.49E-63  | 0 AIF1     | #DIV/0!     |
| SERPINE1  | 3.77E-66  | 1.55742   | 0.144 | 0.008 | 9.08E-62  | 0 SERPINE1 | 18          |
| PDE3B     | 4.32E-66  | 1.373634  | 0.158 | 0.01  | 1.04E-61  | 0 PDE3B    | 15.8        |
| MS4A4A2   | 7.75E-66  | 0.545981  | 0.096 | 0.004 | 1.87E-61  | 0 MS4A4A   | 24          |
| RHOH4     | 1.69E-65  | 1.735738  | 0.281 | 0.031 | 4.07E-61  | 0 RHOH     | 9.064516129 |



|                |          |           |       |       |          |             |             |
|----------------|----------|-----------|-------|-------|----------|-------------|-------------|
| CTSL1          | 1.88E-64 | 1.508454  | 0.178 | 0.013 | 4.53E-60 | 0 CTSL      | 13.69230769 |
| CCDC88A3       | 3.94E-64 | 1.438688  | 0.233 | 0.022 | 9.50E-60 | 0 CCDC88A   | 10.59090909 |
| PRRX1          | 6.38E-64 | 0.3299639 | 0.048 | 0.001 | 1.54E-59 | 0 PRRX1     | 48          |
| TIE1           | 6.87E-64 | 0.4100222 | 0.048 | 0.001 | 1.66E-59 | 0 TIE1      | 48          |
| IL10RA         | 7.30E-64 | 0.246591  | 0.041 | 0.001 | 1.76E-59 | 0 IL10RA    | 41          |
| ADAM283        | 3.91E-62 | 1.733708  | 0.212 | 0.019 | 9.43E-58 | 0 ADAM28    | 11.15789474 |
| F2RL3          | 5.90E-62 | 0.1842318 | 0.014 | 0     | 1.42E-57 | 0 F2RL3     | #DIV/0!     |
| C1QB           | 5.90E-62 | 0.1414277 | 0.014 | 0     | 1.42E-57 | 0 C1QB      | #DIV/0!     |
| NPR1           | 5.90E-62 | 0.1200528 | 0.014 | 0     | 1.42E-57 | 0 NPR1      | #DIV/0!     |
| GPR132         | 1.06E-61 | 0.393378  | 0.089 | 0.003 | 2.55E-57 | 0 GPR132    | 29.66666667 |
| RP11-325F22.21 | 2.56E-61 | 0.7983626 | 0.158 | 0.011 | 6.17E-57 | 0 RP11-325F | 14.36363636 |
| PRKCB          | 2.83E-59 | 1.166009  | 0.137 | 0.008 | 6.82E-55 | 0 PRKCB     | 17.125      |
| PLXNC1         | 4.75E-59 | 1.024141  | 0.144 | 0.009 | 1.15E-54 | 0 PLXNC1    | 16          |
| RP11-624C23.12 | 5.70E-59 | 1.379504  | 0.205 | 0.019 | 1.37E-54 | 0 RP11-624C | 10.78947368 |
| CD834          | 2.70E-57 | 1.832541  | 0.39  | 0.067 | 6.52E-53 | 0 CD83      | 5.820895522 |
| ARHGAP242      | 3.45E-57 | 1.403555  | 0.267 | 0.032 | 8.33E-53 | 0 ARHGAP24  | 8.34375     |
| ELMO11         | 4.69E-57 | 1.200932  | 0.24  | 0.026 | 1.13E-52 | 0 ELMO1     | 9.230769231 |
| ST8SIA4        | 1.98E-56 | 1.068268  | 0.185 | 0.016 | 4.77E-52 | 0 ST8SIA4   | 11.5625     |
| LCP2           | 1.06E-55 | 0.5797818 | 0.13  | 0.008 | 2.56E-51 | 0 LCP2      | 16.25       |
| MEG8           | 2.00E-55 | 0.1137132 | 0.021 | 0     | 4.83E-51 | 0 MEG8      | #DIV/0!     |
| PECAM12        | 2.51E-55 | 1.477854  | 0.144 | 0.01  | 6.05E-51 | 0 PECAM1    | 14.4        |
| ABCA16         | 4.73E-55 | 1.084243  | 0.24  | 0.027 | 1.14E-50 | 0 ABCA1     | 8.888888889 |
| RASSF21        | 6.59E-55 | 0.5176581 | 0.082 | 0.003 | 1.59E-50 | 0 RASSF2    | 27.33333333 |
| DOCK82         | 2.07E-54 | 2.266053  | 0.356 | 0.06  | 5.00E-50 | 0 DOCK8     | 5.933333333 |
| TCHH1          | 3.12E-54 | 0.3442945 | 0.041 | 0.001 | 7.53E-50 | 0 TCHH      | 41          |
| RBMS3-AS32     | 3.94E-54 | 0.6623967 | 0.116 | 0.007 | 9.50E-50 | 0 RBMS3-AS  | 16.57142857 |
| CRLF21         | 3.99E-54 | 0.3386669 | 0.075 | 0.003 | 9.62E-50 | 0 CRLF2     | 25          |
| ANKDD1A        | 7.20E-54 | 0.3707436 | 0.089 | 0.004 | 1.74E-49 | 0 ANKDD1A   | 22.25       |
| CLIC2          | 2.52E-53 | 0.5191014 | 0.089 | 0.004 | 6.09E-49 | 0 CLIC2     | 22.25       |
| PFKFB33        | 2.70E-53 | 1.412486  | 0.363 | 0.061 | 6.50E-49 | 0 PFKFB3    | 5.950819672 |
| APBB1IP        | 9.41E-52 | 0.6504618 | 0.096 | 0.005 | 2.27E-47 | 0 APBB1IP   | 19.2        |
| BMP6           | 1.02E-51 | 0.5114406 | 0.075 | 0.003 | 2.47E-47 | 0 BMP6      | 25          |
| PTGIR          | 1.45E-51 | 0.1652682 | 0.041 | 0.001 | 3.50E-47 | 0 PTGIR     | 41          |
| RAPGEF13       | 1.55E-51 | 1.759384  | 0.459 | 0.1   | 3.73E-47 | 0 RAPGEF1   | 4.59        |
| VASH11         | 1.50E-50 | 0.1604921 | 0.034 | 0     | 3.62E-46 | 0 VASH1     | #DIV/0!     |
| SMAP23         | 1.63E-50 | 1.051325  | 0.233 | 0.028 | 3.94E-46 | 0 SMAP2     | 8.321428571 |
| PIK3AP1        | 1.49E-49 | 0.6563428 | 0.137 | 0.01  | 3.58E-45 | 0 PIK3AP1   | 13.7        |
| NR2F1          | 6.47E-49 | 0.1915636 | 0.027 | 0     | 1.56E-44 | 0 NR2F1     | #DIV/0!     |
| SLC16A101      | 9.24E-49 | 1.260486  | 0.219 | 0.025 | 2.23E-44 | 0 SLC16A10  | 8.76        |
| ARHGAP312      | 9.67E-49 | 0.845516  | 0.164 | 0.015 | 2.33E-44 | 0 ARHGAP31  | 10.93333333 |
| CALCRL1        | 8.02E-48 | 0.6765846 | 0.068 | 0.003 | 1.93E-43 | 0 CALCRL    | 22.66666667 |
| SSH12          | 8.79E-48 | 0.8027503 | 0.226 | 0.027 | 2.12E-43 | 0 SSH1      | 8.37037037  |
| SPP12          | 1.74E-47 | 2.698775  | 0.151 | 0.013 | 4.19E-43 | 0 SPP1      | 11.61538462 |
| HCK1           | 1.79E-47 | 0.5815042 | 0.123 | 0.008 | 4.32E-43 | 0 HCK       | 15.375      |
| SLC11A1        | 3.77E-47 | 0.3728033 | 0.048 | 0.001 | 9.08E-43 | 0 SLC11A1   | 48          |
| RP11-286N3.21  | 4.45E-47 | 0.3938052 | 0.041 | 0.001 | 1.07E-42 | 0 RP11-286N | 41          |
| COL4A24        | 1.23E-46 | 1.093665  | 0.158 | 0.014 | 2.96E-42 | 0 COL4A2    | 11.28571429 |
| RP11-426C22.5  | 1.28E-46 | 0.4166895 | 0.062 | 0.002 | 3.09E-42 | 0 RP11-426C | 31          |
| RBMS32         | 1.30E-46 | 1.560221  | 0.329 | 0.058 | 3.13E-42 | 0 RBMS3     | 5.672413793 |
| TBXAS12        | 1.32E-46 | 1.042661  | 0.219 | 0.026 | 3.19E-42 | 0 TBXAS1    | 8.423076923 |
| SLA            | 4.66E-46 | 0.8106108 | 0.11  | 0.007 | 1.12E-41 | 0 SLA       | 15.71428571 |
| C3AR11         | 2.12E-45 | 0.59769   | 0.11  | 0.007 | 5.10E-41 | 0 C3AR1     | 15.71428571 |

|                |          |           |       |       |          |             |             |
|----------------|----------|-----------|-------|-------|----------|-------------|-------------|
| MIR181A1HG1    | 4.25E-45 | 0.9033524 | 0.144 | 0.012 | 1.03E-40 | 0 MIR181A1H | 12          |
| RNASE61        | 5.08E-45 | 0.4847616 | 0.055 | 0.002 | 1.22E-40 | 0 RNASE6    | 27.5        |
| KLHL6          | 1.18E-44 | 0.448682  | 0.068 | 0.003 | 2.84E-40 | 0 KLHL6     | 22.66666667 |
| RP11-452H21.4  | 1.74E-44 | 0.1800327 | 0.027 | 0     | 4.20E-40 | 0 RP11-452H | #DIV/0!     |
| HLA-DQB12      | 3.48E-44 | 0.5842193 | 0.123 | 0.009 | 8.39E-40 | 0 HLA-DQB1  | 13.66666667 |
| IGLC2          | 1.30E-41 | 0.2862544 | 0.014 | 0     | 3.13E-37 | 0 IGLC2     | #DIV/0!     |
| RASGRP31       | 1.91E-41 | 0.8762162 | 0.192 | 0.023 | 4.61E-37 | 0 RASGRP3   | 8.347826087 |
| CTD-2282P23.21 | 6.62E-41 | 0.2323998 | 0.055 | 0.002 | 1.60E-36 | 0 CTD-2282P | 27.5        |
| ACKR3          | 8.75E-41 | 0.3075007 | 0.027 | 0     | 2.11E-36 | 0 ACKR3     | #DIV/0!     |
| KCNQ32         | 1.69E-40 | 1.270045  | 0.219 | 0.03  | 4.08E-36 | 0 KCNQ3     | 7.3         |
| ADGRF5         | 4.06E-40 | 0.7230778 | 0.062 | 0.002 | 9.80E-36 | 0 ADGRF5    | 31          |
| MEF2C2         | 5.31E-40 | 0.8776707 | 0.158 | 0.016 | 1.28E-35 | 0 MEF2C     | 9.875       |
| WIF1           | 5.32E-40 | 0.317968  | 0.041 | 0.001 | 1.28E-35 | 0 WIF1      | 41          |
| SLC7A7         | 2.13E-39 | 0.5315748 | 0.123 | 0.01  | 5.14E-35 | 0 SLC7A7    | 12.3        |
| COL4A11        | 2.16E-39 | 0.6898138 | 0.082 | 0.005 | 5.20E-35 | 0 COL4A1    | 16.4        |
| DOCK43         | 2.70E-39 | 2.845021  | 0.692 | 0.311 | 6.51E-35 | 0 DOCK4     | 2.225080386 |
| RFTN1          | 3.02E-39 | 0.3985855 | 0.096 | 0.006 | 7.29E-35 | 0 RFTN1     | 16          |
| GK2            | 8.16E-38 | 1.187664  | 0.281 | 0.05  | 1.97E-33 | 0 GK        | 5.62        |
| GMFG           | 1.86E-37 | 0.3457359 | 0.075 | 0.004 | 4.48E-33 | 0 GMFG      | 18.75       |
| PLEKHO1        | 3.40E-37 | 0.3365602 | 0.082 | 0.005 | 8.19E-33 | 0 PLEKHO1   | 16.4        |
| PTGS22         | 3.78E-37 | 1.005435  | 0.13  | 0.012 | 9.12E-33 | 0 PTGS2     | 10.83333333 |
| ARHGEF151      | 5.44E-36 | 0.2562457 | 0.034 | 0.001 | 1.31E-31 | 0 ARHGEF15  | 34          |
| MMP3           | 2.01E-35 | 2.516542  | 0.048 | 0.002 | 4.84E-31 | 0 MMP3      | 24          |
| MCOLN21        | 2.18E-35 | 0.4101515 | 0.048 | 0.002 | 5.25E-31 | 0 MCOLN2    | 24          |
| CD2002         | 5.10E-35 | 0.4536468 | 0.062 | 0.003 | 1.23E-30 | 0 CD200     | 20.66666667 |
| FMNL31         | 1.47E-34 | 0.6573433 | 0.151 | 0.017 | 3.54E-30 | 0 FMNL3     | 8.882352941 |
| ARHGAP25       | 4.13E-34 | 0.4076188 | 0.068 | 0.004 | 9.96E-30 | 0 ARHGAP25  | 17          |
| GPSM31         | 4.90E-34 | 0.3077186 | 0.055 | 0.002 | 1.18E-29 | 0 GPSM3     | 27.5        |
| S1PR11         | 1.20E-33 | 0.2302718 | 0.041 | 0.001 | 2.90E-29 | 0 S1PR1     | 41          |
| LPAR62         | 1.53E-33 | 1.166356  | 0.322 | 0.071 | 3.70E-29 | 0 LPAR6     | 4.535211268 |
| MYLK           | 1.88E-33 | 2.122999  | 0.151 | 0.018 | 4.53E-29 | 0 MYLK      | 8.388888889 |
| FYN3           | 6.03E-33 | 1.162095  | 0.185 | 0.026 | 1.45E-28 | 0 FYN       | 7.115384615 |
| CNRIP1         | 7.67E-33 | 0.1591383 | 0.034 | 0.001 | 1.85E-28 | 0 CNRIP1    | 34          |
| SLAMF1         | 1.27E-32 | 0.1503137 | 0.027 | 0.001 | 3.06E-28 | 0 SLAMF1    | 27          |
| INHBA2         | 1.51E-32 | 0.5897411 | 0.089 | 0.007 | 3.64E-28 | 0 INHBA     | 12.71428571 |
| TFEC1          | 1.66E-32 | 1.000492  | 0.171 | 0.023 | 4.00E-28 | 0 TFEC      | 7.434782609 |
| PKD22          | 4.18E-32 | 1.533046  | 0.274 | 0.056 | 1.01E-27 | 0 PKD2      | 4.892857143 |
| FAM78A         | 7.54E-32 | 0.169909  | 0.007 | 0     | 1.82E-27 | 0 FAM78A    | #DIV/0!     |
| CORO1A         | 7.54E-32 | 0.169909  | 0.007 | 0     | 1.82E-27 | 0 CORO1A    | #DIV/0!     |
| CD2            | 7.54E-32 | 0.1203927 | 0.007 | 0     | 1.82E-27 | 0 CD2       | #DIV/0!     |
| GIMAP6         | 7.54E-32 | 0.1203927 | 0.007 | 0     | 1.82E-27 | 0 GIMAP6    | #DIV/0!     |
| RAB202         | 2.35E-31 | 0.9055876 | 0.164 | 0.022 | 5.68E-27 | 0 RAB20     | 7.454545455 |
| AMPD32         | 2.96E-31 | 1.202187  | 0.219 | 0.037 | 7.15E-27 | 0 AMPD3     | 5.918918919 |
| PIK3CG         | 5.30E-31 | 0.1546785 | 0.021 | 0     | 1.28E-26 | 0 PIK3CG    | #DIV/0!     |
| PDE4A2         | 7.82E-31 | 0.5465017 | 0.116 | 0.011 | 1.88E-26 | 0 PDE4A     | 10.54545455 |
| DOCK10         | 9.39E-31 | 0.8163895 | 0.144 | 0.017 | 2.26E-26 | 0 DOCK10    | 8.470588235 |
| TNFRSF1B3      | 1.30E-30 | 0.9852007 | 0.212 | 0.036 | 3.15E-26 | 0 TNFRSF1B  | 5.888888889 |
| POSTN          | 1.32E-30 | 0.458529  | 0.027 | 0.001 | 3.18E-26 | 0 POSTN     | 27          |
| ESAM           | 1.33E-30 | 0.2711338 | 0.027 | 0.001 | 3.20E-26 | 0 ESAM      | 27          |
| VCAN           | 1.37E-30 | 0.196875  | 0.027 | 0.001 | 3.30E-26 | 0 VCAN      | 27          |
| RIN33          | 1.48E-30 | 0.8756253 | 0.164 | 0.022 | 3.56E-26 | 0 RIN3      | 7.454545455 |
| FTL4           | 4.35E-30 | 2.259114  | 0.801 | 0.53  | 1.05E-25 | 0 FTL       | 1.511320755 |

|            |          |           |       |       |          |             |             |
|------------|----------|-----------|-------|-------|----------|-------------|-------------|
| NR5A2      | 7.11E-30 | 0.3450051 | 0.062 | 0.003 | 1.71E-25 | 0 NR5A2     | 20.66666667 |
| NEAT16     | 1.40E-29 | 1.147334  | 0.986 | 0.947 | 3.38E-25 | 0 NEAT1     | 1.041182682 |
| MGAT11     | 1.79E-29 | 0.4784487 | 0.116 | 0.012 | 4.32E-25 | 0 MGAT1     | 9.666666667 |
| EPDR1      | 8.51E-29 | 0.146679  | 0.027 | 0.001 | 2.05E-24 | 0 EPDR1     | 27          |
| ITGA4      | 8.64E-29 | 0.4081528 | 0.027 | 0.001 | 2.08E-24 | 0 ITGA4     | 27          |
| LMOD1      | 1.41E-28 | 0.4435113 | 0.055 | 0.003 | 3.40E-24 | 0 LMOD1     | 18.33333333 |
| ACSL4      | 2.69E-28 | 1.251873  | 0.253 | 0.052 | 6.49E-24 | 0 ACSL4     | 4.865384615 |
| PLXDC2     | 3.46E-28 | 1.986135  | 0.397 | 0.122 | 8.35E-24 | 0 PLXDC2    | 3.254098361 |
| WNT2B3     | 5.01E-28 | 1.211219  | 0.219 | 0.041 | 1.21E-23 | 0 WNT2B     | 5.341463415 |
| CD84       | 6.13E-28 | 0.1049725 | 0.021 | 0     | 1.48E-23 | 0 CD84      | #DIV/0!     |
| ACTA2      | 1.68E-27 | 2.407696  | 0.11  | 0.012 | 4.05E-23 | 0 ACTA2     | 9.166666667 |
| ARHGAP61   | 3.97E-27 | 0.5340699 | 0.082 | 0.007 | 9.58E-23 | 0 ARHGAP6   | 11.71428571 |
| PILRA1     | 5.45E-27 | 0.6871539 | 0.158 | 0.023 | 1.31E-22 | 0 PILRA     | 6.869565217 |
| ADGRB3     | 1.04E-26 | 0.7626263 | 0.13  | 0.016 | 2.52E-22 | 0 ADGRB3    | 8.125       |
| CEP1702    | 2.20E-26 | 1.074999  | 0.288 | 0.071 | 5.30E-22 | 0 CEP170    | 4.056338028 |
| FMNL24     | 2.50E-25 | 1.798102  | 0.658 | 0.351 | 6.03E-21 | 0 FMNL2     | 1.874643875 |
| CLEC2B4    | 2.58E-25 | 1.750883  | 0.267 | 0.063 | 6.22E-21 | 0 CLEC2B    | 4.238095238 |
| MIR155HG2  | 1.11E-24 | 0.853199  | 0.096 | 0.01  | 2.67E-20 | 0 MIR155HG  | 9.6         |
| MME        | 1.55E-24 | 0.266956  | 0.055 | 0.003 | 3.74E-20 | 0 MME       | 18.33333333 |
| ARHGAP201  | 2.96E-24 | 0.1441005 | 0.034 | 0.001 | 7.13E-20 | 0 ARHGAP20  | 34          |
| COL5A2     | 2.98E-24 | 0.6521107 | 0.041 | 0.002 | 7.20E-20 | 0 COL5A2    | 20.5        |
| C10orf112  | 3.06E-24 | 0.9259259 | 0.199 | 0.038 | 7.39E-20 | 0 C10orf11  | 5.236842105 |
| CXCL102    | 7.33E-24 | 1.008745  | 0.062 | 0.004 | 1.77E-19 | 0 CXCL10    | 15.5        |
| JAM3       | 1.04E-23 | 0.3152521 | 0.041 | 0.002 | 2.52E-19 | 0 JAM3      | 20.5        |
| GPX31      | 1.16E-23 | 0.1776373 | 0.041 | 0.002 | 2.80E-19 | 0 GPX3      | 20.5        |
| AXL1       | 1.17E-23 | 0.7671336 | 0.137 | 0.02  | 2.83E-19 | 0 AXL       | 6.85        |
| TCF4-AS1   | 1.79E-23 | 0.1307058 | 0.034 | 0.001 | 4.30E-19 | 0 TCF4-AS1  | 34          |
| NID1       | 2.06E-23 | 0.4109503 | 0.048 | 0.003 | 4.96E-19 | 0 NID1      | 16          |
| SPRY1      | 4.09E-23 | 0.5715788 | 0.068 | 0.006 | 9.87E-19 | 0 SPRY1     | 11.33333333 |
| CIITA1     | 5.72E-23 | 0.3954786 | 0.068 | 0.006 | 1.38E-18 | 0 CIITA     | 11.33333333 |
| SOBP       | 8.48E-23 | 0.2855423 | 0.034 | 0.001 | 2.05E-18 | 0 SOBP      | 34          |
| HAVCR23    | 8.74E-23 | 0.8509713 | 0.192 | 0.038 | 2.11E-18 | 0 HAVCR2    | 5.052631579 |
| RUNX1T1    | 2.99E-22 | 0.2729286 | 0.027 | 0.001 | 7.21E-18 | 0 RUNX1T1   | 27          |
| MERTK3     | 3.86E-22 | 0.5116217 | 0.089 | 0.009 | 9.31E-18 | 0 MERTK     | 9.888888889 |
| PCAT192    | 4.39E-22 | 0.5697776 | 0.055 | 0.004 | 1.06E-17 | 0 PCAT19    | 13.75       |
| DSE2       | 1.30E-21 | 1.017214  | 0.192 | 0.04  | 3.14E-17 | 0 DSE       | 4.8         |
| ADGRE53    | 1.43E-21 | 0.4602911 | 0.116 | 0.016 | 3.45E-17 | 0 ADGRE5    | 7.25        |
| LINC009961 | 1.83E-21 | 0.2175198 | 0.034 | 0.001 | 4.41E-17 | 0 LINC00996 | 34          |
| VIM4       | 2.60E-21 | 1.177039  | 0.363 | 0.123 | 6.28E-17 | 0 VIM       | 2.951219512 |
| CAV12      | 2.77E-21 | 1.6507    | 0.164 | 0.031 | 6.69E-17 | 0 CAV1      | 5.290322581 |
| COL15A11   | 2.85E-21 | 0.5733443 | 0.041 | 0.002 | 6.88E-17 | 0 COL15A1   | 20.5        |
| NID2       | 2.86E-21 | 0.17244   | 0.027 | 0.001 | 6.90E-17 | 0 NID2      | 27          |
| ACTG22     | 3.76E-21 | 1.685114  | 0.089 | 0.01  | 9.06E-17 | 0 ACTG2     | 8.9         |
| AFAP1L1    | 6.37E-21 | 0.383483  | 0.048 | 0.003 | 1.54E-16 | 0 AFAP1L1   | 16          |
| JCHAIN     | 7.21E-21 | 4.236802  | 0.034 | 0.002 | 1.74E-16 | 0 JCHAIN    | 17          |
| OSCAR      | 8.41E-21 | 0.1418919 | 0.034 | 0.002 | 2.03E-16 | 0 OSCAR     | 17          |
| PTK2B3     | 9.38E-21 | 1.231925  | 0.178 | 0.036 | 2.26E-16 | 0 PTK2B     | 4.944444444 |
| FABP51     | 1.80E-20 | 0.585327  | 0.062 | 0.005 | 4.34E-16 | 0 FABP5     | 12.4        |
| SH3BP53    | 2.17E-20 | 0.8166075 | 0.226 | 0.055 | 5.24E-16 | 0 SH3BP5    | 4.109090909 |
| TWIST1     | 2.21E-20 | 0.1406694 | 0.027 | 0.001 | 5.32E-16 | 0 TWIST1    | 27          |
| ARHGAP9    | 2.23E-20 | 0.1443453 | 0.027 | 0.001 | 5.38E-16 | 0 ARHGAP9   | 27          |
| TGFBI3     | 2.37E-20 | 1.207253  | 0.151 | 0.027 | 5.72E-16 | 0 TGFBI     | 5.592592593 |

|               |          |           |       |       |          |             |             |
|---------------|----------|-----------|-------|-------|----------|-------------|-------------|
| HLA-DMB1      | 3.16E-20 | 0.1655348 | 0.034 | 0.002 | 7.62E-16 | 0 HLA-DMB   | 17          |
| P2RX74        | 4.02E-20 | 0.5296575 | 0.116 | 0.017 | 9.69E-16 | 0 P2RX7     | 6.823529412 |
| FCHSD24       | 4.85E-20 | 1.357641  | 0.363 | 0.13  | 1.17E-15 | 0 FCHSD2    | 2.792307692 |
| C1orf54       | 6.98E-20 | 0.4423489 | 0.103 | 0.014 | 1.68E-15 | 0 C1orf54   | 7.357142857 |
| PTPN15        | 7.98E-20 | 0.962842  | 0.205 | 0.047 | 1.92E-15 | 0 PTPN1     | 4.361702128 |
| JAM2          | 1.13E-19 | 0.2998796 | 0.048 | 0.003 | 2.73E-15 | 0 JAM2      | 16          |
| BASP13        | 1.15E-19 | 1.033946  | 0.219 | 0.053 | 2.78E-15 | 0 BASP1     | 4.132075472 |
| ST6GALNAC31   | 1.71E-19 | 1.036849  | 0.11  | 0.016 | 4.13E-15 | 0 ST6GALNA  | 6.875       |
| ABCA62        | 2.42E-19 | 0.2951862 | 0.048 | 0.003 | 5.84E-15 | 0 ABCA6     | 16          |
| RP11-44K6.31  | 2.64E-19 | 0.2878058 | 0.082 | 0.009 | 6.37E-15 | 0 RP11-44K6 | 9.111111111 |
| NAV13         | 2.78E-19 | 1.014246  | 0.205 | 0.049 | 6.69E-15 | 0 NAV1      | 4.183673469 |
| PHACTR1       | 3.32E-19 | 0.7734954 | 0.144 | 0.026 | 8.02E-15 | 0 PHACTR1   | 5.538461538 |
| ARMC93        | 3.71E-19 | 1.399129  | 0.322 | 0.105 | 8.95E-15 | 0 ARMC9     | 3.066666667 |
| PDPN          | 8.27E-19 | 0.1664752 | 0.027 | 0.001 | 1.99E-14 | 0 PDPN      | 27          |
| PELI14        | 9.34E-19 | 1.954974  | 0.596 | 0.328 | 2.25E-14 | 0 PELI1     | 1.817073171 |
| IL62          | 1.48E-18 | 0.4364153 | 0.041 | 0.003 | 3.57E-14 | 0 IL6       | 13.66666667 |
| RNASE12       | 1.72E-18 | 0.8372194 | 0.123 | 0.02  | 4.14E-14 | 0 RNASE1    | 6.15        |
| GK-AS11       | 2.10E-18 | 0.4437532 | 0.075 | 0.008 | 5.07E-14 | 0 GK-AS1    | 9.375       |
| RASSF83       | 2.63E-18 | 0.9533654 | 0.315 | 0.105 | 6.34E-14 | 0 RASSF8    | 3           |
| FAM126A3      | 2.89E-18 | 1.053189  | 0.151 | 0.029 | 6.97E-14 | 0 FAM126A   | 5.206896552 |
| IL4I11        | 3.16E-18 | 0.2536986 | 0.055 | 0.005 | 7.61E-14 | 0 IL4I1     | 11          |
| IGF11         | 4.04E-18 | 0.3003353 | 0.027 | 0.001 | 9.73E-14 | 0 IGF1      | 27          |
| SLC8A11       | 4.11E-18 | 0.9271982 | 0.103 | 0.015 | 9.91E-14 | 0 SLC8A1    | 6.866666667 |
| CCDC168       | 4.17E-18 | 0.1196551 | 0.027 | 0.001 | 1.00E-13 | 0 CCDC168   | 27          |
| EBF12         | 4.34E-18 | 0.750418  | 0.11  | 0.017 | 1.05E-13 | 0 EBF1      | 6.470588235 |
| GYPC3         | 4.37E-18 | 0.4730404 | 0.075 | 0.008 | 1.05E-13 | 0 GYPC      | 9.375       |
| RUNX33        | 4.77E-18 | 0.3074035 | 0.055 | 0.005 | 1.15E-13 | 0 RUNX3     | 11          |
| AC069368.3    | 6.84E-18 | 0.4939217 | 0.082 | 0.01  | 1.65E-13 | 0 AC069368. | 8.2         |
| LAMA41        | 6.99E-18 | 0.5672103 | 0.055 | 0.005 | 1.68E-13 | 0 LAMA4     | 11          |
| CREG13        | 1.10E-17 | 0.9497088 | 0.205 | 0.051 | 2.64E-13 | 0 CREG1     | 4.019607843 |
| VOPP14        | 3.16E-17 | 0.8304441 | 0.247 | 0.071 | 7.61E-13 | 0 VOPP1     | 3.478873239 |
| RUNX23        | 3.37E-17 | 0.733262  | 0.13  | 0.024 | 8.13E-13 | 0 RUNX2     | 5.416666667 |
| CCL203        | 3.96E-17 | 2.986833  | 0.411 | 0.183 | 9.54E-13 | 0 CCL20     | 2.245901639 |
| ARHGAP182     | 5.39E-17 | 0.986316  | 0.253 | 0.075 | 1.30E-12 | 0 ARHGAP18  | 3.373333333 |
| CPVL1         | 6.97E-17 | 0.2686143 | 0.055 | 0.005 | 1.68E-12 | 0 CPVL      | 11          |
| GNG2          | 7.23E-17 | 0.4636938 | 0.068 | 0.007 | 1.74E-12 | 0 GNG2      | 9.714285714 |
| AFF14         | 9.57E-17 | 1.150782  | 0.616 | 0.374 | 2.31E-12 | 0 AFF1      | 1.647058824 |
| PDE4DIP2      | 1.02E-16 | 0.8652836 | 0.233 | 0.066 | 2.45E-12 | 0 PDE4DIP   | 3.53030303  |
| ANKRD443      | 1.15E-16 | 1.247018  | 0.253 | 0.077 | 2.78E-12 | 0 ANKRD44   | 3.285714286 |
| MB21D23       | 1.41E-16 | 0.9548548 | 0.295 | 0.096 | 3.41E-12 | 0 MB21D2    | 3.072916667 |
| TNFRSF91      | 1.43E-16 | 0.148222  | 0.034 | 0.002 | 3.45E-12 | 0 TNFRSF9   | 17          |
| IGHA1         | 1.65E-16 | 3.323306  | 0.007 | 0     | 3.98E-12 | 0 IGH A1    | #DIV/0!     |
| CEP682        | 1.83E-16 | 0.5871631 | 0.164 | 0.037 | 4.42E-12 | 0 CEP68     | 4.432432432 |
| RP11-290H9.22 | 2.67E-16 | 0.4366704 | 0.068 | 0.008 | 6.44E-12 | 0 RP11-290H | 8.5         |
| CCL8          | 2.71E-16 | 0.4854161 | 0.027 | 0.001 | 6.53E-12 | 0 CCL8      | 27          |
| SCARF1        | 2.75E-16 | 0.1207059 | 0.027 | 0.001 | 6.64E-12 | 0 SCARF1    | 27          |
| SLCO2B12      | 2.92E-16 | 0.4458755 | 0.062 | 0.006 | 7.04E-12 | 0 SLCO2B1   | 10.33333333 |
| KB-1507C5.42  | 3.07E-16 | 0.4640759 | 0.062 | 0.006 | 7.40E-12 | 0 KB-1507C5 | 10.33333333 |
| SDCCAG83      | 3.08E-16 | 0.9576543 | 0.37  | 0.149 | 7.41E-12 | 0 SDCCAG8   | 2.483221477 |
| CLMP          | 3.92E-16 | 1.05427   | 0.103 | 0.016 | 9.46E-12 | 0 CLMP      | 6.4375      |
| THBD1         | 4.00E-16 | 0.2886436 | 0.041 | 0.003 | 9.64E-12 | 0 THBD      | 13.66666667 |
| ADGRL4        | 4.14E-16 | 0.5666408 | 0.048 | 0.004 | 9.99E-12 | 0 ADGRL4    | 12          |

|               |          |           |       |       |          |              |             |
|---------------|----------|-----------|-------|-------|----------|--------------|-------------|
| ROBO12        | 4.45E-16 | 0.8706276 | 0.233 | 0.068 | 1.07E-11 | 0 ROBO1      | 3.426470588 |
| RGL12         | 4.54E-16 | 0.8896788 | 0.199 | 0.052 | 1.09E-11 | 0 RGL1       | 3.826923077 |
| MCTP12        | 4.73E-16 | 1.275663  | 0.288 | 0.099 | 1.14E-11 | 0 MCTP1      | 2.909090909 |
| IL15RA3       | 5.76E-16 | 0.6046198 | 0.151 | 0.032 | 1.39E-11 | 0 IL15RA     | 4.71875     |
| PPP1R16B      | 6.79E-16 | 0.5584443 | 0.041 | 0.003 | 1.64E-11 | 0 PPP1R16B   | 13.66666667 |
| FGF71         | 7.39E-16 | 0.3153315 | 0.034 | 0.002 | 1.78E-11 | 0 FGF7       | 17          |
| PREX2         | 8.13E-16 | 0.5396571 | 0.055 | 0.005 | 1.96E-11 | 0 PREX2      | 11          |
| CFH           | 9.01E-16 | 0.1652038 | 0.027 | 0.001 | 2.17E-11 | 0 CFH        | 27          |
| SLC7A113      | 9.30E-16 | 0.9556161 | 0.192 | 0.05  | 2.24E-11 | 0 SLC7A11    | 3.84        |
| ETS24         | 1.23E-15 | 1.204083  | 0.418 | 0.186 | 2.98E-11 | 0 ETS2       | 2.247311828 |
| WDFY4         | 1.39E-15 | 0.1682885 | 0.041 | 0.003 | 3.35E-11 | 0 WDFY4      | 13.66666667 |
| SH3TC1        | 1.55E-15 | 0.2681532 | 0.034 | 0.002 | 3.74E-11 | 0 SH3TC1     | 17          |
| TIMP32        | 2.26E-15 | 1.012076  | 0.096 | 0.015 | 5.45E-11 | 0 TIMP3      | 6.4         |
| ATG74         | 2.39E-15 | 1.153626  | 0.438 | 0.212 | 5.75E-11 | 0 ATG7       | 2.066037736 |
| SYTL32        | 2.42E-15 | 1.13553   | 0.212 | 0.06  | 5.82E-11 | 0 SYTL3      | 3.533333333 |
| LAMB1         | 2.60E-15 | 0.6541339 | 0.103 | 0.017 | 6.26E-11 | 0 LAMB1      | 6.058823529 |
| IL1A1         | 2.82E-15 | 0.3175162 | 0.027 | 0.001 | 6.79E-11 | 0 IL1A       | 27          |
| RILPL24       | 3.03E-15 | 0.6898938 | 0.171 | 0.042 | 7.32E-11 | 0 RILPL2     | 4.071428571 |
| SLC8A1-AS1    | 3.88E-15 | 0.108647  | 0.034 | 0.002 | 9.35E-11 | 0 SLC8A1-AS1 | 17          |
| ZEB14         | 4.03E-15 | 1.512844  | 0.199 | 0.055 | 9.72E-11 | 0 ZEB1       | 3.618181818 |
| NUAK11        | 4.30E-15 | 0.3384628 | 0.075 | 0.01  | 1.04E-10 | 0 NUAK1      | 7.5         |
| GJA13         | 6.02E-15 | 0.7372903 | 0.137 | 0.029 | 1.45E-10 | 0 GJA1       | 4.724137931 |
| IDO11         | 7.38E-15 | 0.7875531 | 0.13  | 0.026 | 1.78E-10 | 0 IDO1       | 5           |
| NOTCH42       | 7.41E-15 | 0.2069985 | 0.021 | 0.001 | 1.79E-10 | 0 NOTCH4     | 21          |
| STK42         | 8.11E-15 | 1.390413  | 0.199 | 0.055 | 1.96E-10 | 0 STK4       | 3.618181818 |
| MYO1F2        | 9.01E-15 | 0.3648884 | 0.075 | 0.01  | 2.17E-10 | 0 MYO1F      | 7.5         |
| HMOX12        | 9.90E-15 | 0.962334  | 0.192 | 0.051 | 2.39E-10 | 0 HMOX1      | 3.764705882 |
| COL6A3        | 1.23E-14 | 0.4568273 | 0.055 | 0.006 | 2.96E-10 | 0 COL6A3     | 9.166666667 |
| MANBA2        | 1.26E-14 | 0.7058459 | 0.219 | 0.064 | 3.05E-10 | 0 MANBA      | 3.421875    |
| SH3PXD2B6     | 1.39E-14 | 0.9045182 | 0.315 | 0.122 | 3.36E-10 | 0 SH3PXD2B   | 2.581967213 |
| GPAT33        | 1.47E-14 | 1.251543  | 0.178 | 0.046 | 3.55E-10 | 0 GPAT3      | 3.869565217 |
| PIK3R6        | 1.52E-14 | 0.1374409 | 0.034 | 0.002 | 3.67E-10 | 0 PIK3R6     | 17          |
| ATP13A33      | 1.96E-14 | 1.167704  | 0.479 | 0.261 | 4.72E-10 | 0 ATP13A3    | 1.835249042 |
| APBB3         | 2.23E-14 | 0.223026  | 0.048 | 0.004 | 5.38E-10 | 0 APBB3      | 12          |
| SLC17A7       | 2.29E-14 | 0.1134875 | 0.014 | 0     | 5.51E-10 | 0 SLC17A7    | #DIV/0!     |
| DNAJB5-AS1    | 2.29E-14 | 0.1079904 | 0.014 | 0     | 5.53E-10 | 0 DNAJB5-AS1 | #DIV/0!     |
| MEG31         | 2.30E-14 | 0.3257796 | 0.027 | 0.001 | 5.54E-10 | 0 MEG3       | 27          |
| IL18R12       | 2.31E-14 | 0.2790083 | 0.027 | 0.001 | 5.58E-10 | 0 IL18R1     | 27          |
| LPXN2         | 2.75E-14 | 0.8472959 | 0.192 | 0.054 | 6.62E-10 | 0 LPXN       | 3.555555556 |
| HTRA11        | 2.89E-14 | 0.1834331 | 0.041 | 0.003 | 6.97E-10 | 0 HTRA1      | 13.66666667 |
| RCBTB2        | 3.03E-14 | 0.2527609 | 0.048 | 0.004 | 7.31E-10 | 0 RCBTB2     | 12          |
| MAP4K43       | 3.71E-14 | 1.077707  | 0.459 | 0.235 | 8.95E-10 | 0 MAP4K4     | 1.953191489 |
| GPRIN32       | 3.94E-14 | 0.4689955 | 0.096 | 0.016 | 9.50E-10 | 0 GPRIN3     | 6           |
| RP11-563J2.24 | 4.34E-14 | 0.3251751 | 0.089 | 0.014 | 1.05E-09 | 0 RP11-563J2 | 6.357142857 |
| AOAH1         | 4.39E-14 | 0.6776556 | 0.055 | 0.006 | 1.06E-09 | 0 AOAH       | 9.166666667 |
| ENG3          | 7.99E-14 | 0.5249621 | 0.13  | 0.028 | 1.93E-09 | 0 ENG        | 4.642857143 |
| ADA           | 9.98E-14 | 0.2602224 | 0.034 | 0.002 | 2.41E-09 | 0 ADA        | 17          |
| RP11-428F8.21 | 1.06E-13 | 0.1604855 | 0.034 | 0.002 | 2.55E-09 | 0 RP11-428F8 | 17          |
| ITPKB3        | 1.25E-13 | 0.8723755 | 0.164 | 0.043 | 3.01E-09 | 0 ITPKB      | 3.813953488 |
| SEMA6B        | 1.44E-13 | 0.2487523 | 0.027 | 0.002 | 3.47E-09 | 0 SEMA6B     | 13.5        |
| CPNE82        | 2.09E-13 | 0.3222228 | 0.068 | 0.009 | 5.05E-09 | 0 CPNE8      | 7.555555556 |
| IFI163        | 2.15E-13 | 1.064711  | 0.322 | 0.134 | 5.18E-09 | 0 IFI16      | 2.402985075 |

|                |          |           |       |       |          |              |             |
|----------------|----------|-----------|-------|-------|----------|--------------|-------------|
| PIM23          | 2.17E-13 | 0.5195104 | 0.089 | 0.015 | 5.24E-09 | 0 PIM2       | 5.933333333 |
| B2M4           | 2.41E-13 | 0.8223764 | 0.993 | 0.971 | 5.82E-09 | 0 B2M        | 1.022657055 |
| TFRC1          | 2.54E-13 | 1.089154  | 0.178 | 0.05  | 6.13E-09 | 0 TFRC       | 3.56        |
| SV2B1          | 2.57E-13 | 0.3910795 | 0.055 | 0.006 | 6.21E-09 | 0 SV2B       | 9.166666667 |
| CACNA1C2       | 2.63E-13 | 0.9252285 | 0.096 | 0.017 | 6.35E-09 | 0 CACNA1C    | 5.647058824 |
| ITGA12         | 3.29E-13 | 0.438133  | 0.068 | 0.009 | 7.93E-09 | 0 ITGA1      | 7.555555556 |
| SLC43A21       | 3.37E-13 | 0.3894298 | 0.096 | 0.017 | 8.13E-09 | 0 SLC43A2    | 5.647058824 |
| TMEM176B2      | 3.49E-13 | 0.4659003 | 0.123 | 0.026 | 8.42E-09 | 0 TMEM176B   | 4.730769231 |
| C1orf162       | 3.67E-13 | 0.1119592 | 0.027 | 0.002 | 8.84E-09 | 0 C1orf162   | 13.5        |
| RP11-248J23.72 | 4.03E-13 | 0.2742628 | 0.062 | 0.008 | 9.71E-09 | 0 RP11-248J2 | 7.75        |
| MAML24         | 4.94E-13 | 0.765047  | 0.692 | 0.415 | 1.19E-08 | 0 MAML2      | 1.66746988  |
| ST8SIA2        | 5.25E-13 | 0.4580012 | 0.034 | 0.003 | 1.27E-08 | 0 ST8SIA2    | 11.33333333 |
| CLEC4F         | 5.31E-13 | 0.2231435 | 0.014 | 0     | 1.28E-08 | 0 CLEC4F     | #DIV/0!     |
| CD79B1         | 5.32E-13 | 0.1087797 | 0.014 | 0     | 1.28E-08 | 0 CD79B      | #DIV/0!     |
| LRP1           | 5.86E-13 | 0.2335446 | 0.041 | 0.004 | 1.41E-08 | 0 LRP1       | 10.25       |
| FAM49B4        | 6.33E-13 | 1.043967  | 0.411 | 0.203 | 1.53E-08 | 0 FAM49B     | 2.024630542 |
| SULF11         | 7.86E-13 | 0.2351433 | 0.055 | 0.006 | 1.90E-08 | 0 SULF1      | 9.166666667 |
| HMCN1          | 8.23E-13 | 0.2486884 | 0.048 | 0.005 | 1.98E-08 | 0 HMCN1      | 9.6         |
| SASH14         | 9.86E-13 | 0.9789287 | 0.356 | 0.158 | 2.38E-08 | 0 SASH1      | 2.253164557 |
| CDKN2A1        | 1.07E-12 | 0.1031908 | 0.034 | 0.003 | 2.57E-08 | 0 CDKN2A     | 11.33333333 |
| FGD52          | 1.10E-12 | 0.2575185 | 0.048 | 0.005 | 2.64E-08 | 0 FGD5       | 9.6         |
| RP11-1148O4.2  | 1.47E-12 | 0.1800098 | 0.041 | 0.004 | 3.56E-08 | 0 RP11-1148O | 10.25       |
| CAMK2D4        | 2.46E-12 | 0.8724833 | 0.377 | 0.174 | 5.94E-08 | 0 CAMK2D     | 2.166666667 |
| RAB8B3         | 2.83E-12 | 0.9067886 | 0.342 | 0.146 | 6.82E-08 | 0 RAB8B      | 2.342465753 |
| SH2B31         | 3.70E-12 | 0.3276958 | 0.082 | 0.014 | 8.93E-08 | 0 SH2B3      | 5.857142857 |
| B3GNTL11       | 4.27E-12 | 0.3015808 | 0.048 | 0.005 | 1.03E-07 | 0 B3GNTL1    | 9.6         |
| SDS            | 4.47E-12 | 0.154015  | 0.034 | 0.003 | 1.08E-07 | 0 SDS        | 11.33333333 |
| ACER32         | 5.00E-12 | 0.6409378 | 0.164 | 0.046 | 1.21E-07 | 0 ACER3      | 3.565217391 |
| SOAT13         | 5.12E-12 | 0.7822845 | 0.144 | 0.037 | 1.23E-07 | 0 SOAT1      | 3.891891892 |
| CDH114         | 6.37E-12 | 0.251401  | 0.034 | 0.003 | 1.54E-07 | 0 CDH11      | 11.33333333 |
| CCDC803        | 7.06E-12 | 0.2726512 | 0.075 | 0.012 | 1.70E-07 | 0 CCDC80     | 6.25        |
| CRTAM1         | 7.13E-12 | 0.1151511 | 0.014 | 0     | 1.72E-07 | 0 CRTAM      | #DIV/0!     |
| DOCK23         | 7.93E-12 | 0.370114  | 0.062 | 0.009 | 1.91E-07 | 0 DOCK2      | 6.888888889 |
| CDC42SE22      | 8.20E-12 | 1.147186  | 0.404 | 0.208 | 1.98E-07 | 0 CDC42SE2   | 1.942307692 |
| KCNE13         | 8.86E-12 | 0.4554572 | 0.062 | 0.009 | 2.14E-07 | 0 KCNE1      | 6.888888889 |
| IKZF12         | 1.10E-11 | 0.2045748 | 0.041 | 0.004 | 2.66E-07 | 0 IKZF1      | 10.25       |
| FLT11          | 1.26E-11 | 0.5010066 | 0.075 | 0.012 | 3.03E-07 | 0 FLT1       | 6.25        |
| MMP15          | 1.30E-11 | 1.034873  | 0.027 | 0.002 | 3.12E-07 | 0 MMP1       | 13.5        |
| PTGER42        | 1.40E-11 | 0.5161084 | 0.062 | 0.009 | 3.37E-07 | 0 PTGER4     | 6.888888889 |
| CTSH1          | 1.54E-11 | 0.1862058 | 0.062 | 0.009 | 3.71E-07 | 0 CTSH       | 6.888888889 |
| CTSS3          | 1.61E-11 | 0.8358815 | 0.315 | 0.137 | 3.88E-07 | 0 CTSS       | 2.299270073 |
| PRDM13         | 1.90E-11 | 0.5078836 | 0.13  | 0.032 | 4.57E-07 | 0 PRDM1      | 4.0625      |
| ME11           | 2.07E-11 | 0.7981365 | 0.144 | 0.038 | 4.99E-07 | 0 ME1        | 3.789473684 |
| CTTNBP2NL3     | 2.16E-11 | 1.115494  | 0.397 | 0.21  | 5.22E-07 | 0 CTTNBP2N   | 1.89047619  |
| GBP51          | 2.59E-11 | 0.1441044 | 0.034 | 0.003 | 6.25E-07 | 0 GBP5       | 11.33333333 |
| FNIP26         | 2.98E-11 | 1.271707  | 0.267 | 0.108 | 7.18E-07 | 0 FNIP2      | 2.472222222 |
| ITM2A2         | 3.26E-11 | 0.3309048 | 0.048 | 0.006 | 7.86E-07 | 0 ITM2A      | 8           |
| MMP21          | 3.87E-11 | 0.166622  | 0.034 | 0.003 | 9.34E-07 | 0 MMP2       | 11.33333333 |
| ENTPD1-AS12    | 3.97E-11 | 0.6800069 | 0.171 | 0.052 | 9.56E-07 | 0 ENTPD1-AS  | 3.288461538 |
| CD141          | 3.97E-11 | 0.1829687 | 0.041 | 0.004 | 9.57E-07 | 0 CD14       | 10.25       |
| GAB25          | 4.01E-11 | 1.157528  | 0.384 | 0.199 | 9.67E-07 | 0 GAB2       | 1.929648241 |
| SIPA1L15       | 4.33E-11 | 1.391033  | 0.568 | 0.385 | 1.04E-06 | 0 SIPA1L1    | 1.475324675 |

|                |          |           |       |       |          |             |             |
|----------------|----------|-----------|-------|-------|----------|-------------|-------------|
| RCSD11         | 5.33E-11 | 0.5179485 | 0.075 | 0.013 | 1.28E-06 | 0 RCSD1     | 5.769230769 |
| MAF4           | 5.41E-11 | 0.2409609 | 0.062 | 0.009 | 1.30E-06 | 0 MAF       | 6.888888889 |
| PROS11         | 5.57E-11 | 0.1744668 | 0.034 | 0.003 | 1.34E-06 | 0 PROS1     | 11.33333333 |
| MITF4          | 5.76E-11 | 0.6273356 | 0.13  | 0.033 | 1.39E-06 | 0 MITF      | 3.939393939 |
| C5AR21         | 7.44E-11 | 0.4616675 | 0.062 | 0.009 | 1.79E-06 | 0 C5AR2     | 6.888888889 |
| ST182          | 7.46E-11 | 0.3526382 | 0.055 | 0.007 | 1.80E-06 | 0 ST18      | 7.857142857 |
| GIMAP8         | 8.25E-11 | 0.2092078 | 0.027 | 0.002 | 1.99E-06 | 0 GIMAP8    | 13.5        |
| B3GNT54        | 9.64E-11 | 0.8391226 | 0.178 | 0.057 | 2.32E-06 | 0 B3GNT5    | 3.122807018 |
| LRRK21         | 9.66E-11 | 0.3216103 | 0.055 | 0.007 | 2.33E-06 | 0 LRRK2     | 7.857142857 |
| AKR1B152       | 1.25E-10 | 0.2377062 | 0.048 | 0.006 | 3.00E-06 | 0 AKR1B15   | 8           |
| RP11-452H21.13 | 1.26E-10 | 0.7445613 | 0.199 | 0.069 | 3.05E-06 | 0 RP11-452H | 2.884057971 |
| OLFML2B1       | 1.41E-10 | 0.2067502 | 0.027 | 0.002 | 3.41E-06 | 0 OLFML2B   | 13.5        |
| TEX26-AS1      | 1.61E-10 | 0.1672718 | 0.021 | 0.001 | 3.89E-06 | 0 TEX26-AS1 | 21          |
| GSTO13         | 1.79E-10 | 0.5836388 | 0.13  | 0.034 | 4.31E-06 | 0 GSTO1     | 3.823529412 |
| PCBP31         | 2.07E-10 | 0.2763946 | 0.041 | 0.005 | 4.99E-06 | 0 PCBP3     | 8.2         |
| CYTH14         | 2.26E-10 | 0.8262812 | 0.322 | 0.153 | 5.45E-06 | 0 CYTH1     | 2.104575163 |
| RHOJ2          | 2.69E-10 | 0.4880662 | 0.096 | 0.021 | 6.48E-06 | 0 RHOJ      | 4.571428571 |
| RP11-779O18.12 | 3.74E-10 | 0.2788231 | 0.055 | 0.008 | 9.03E-06 | 0 RP11-779O | 6.875       |
| PDGFRA2        | 3.81E-10 | 0.224861  | 0.027 | 0.002 | 9.18E-06 | 0 PDGFRA    | 13.5        |
| RP11-46C24.7   | 3.86E-10 | 0.1106439 | 0.014 | 0.001 | 9.31E-06 | 0 RP11-46C2 | 14          |
| FYB2           | 4.49E-10 | 0.5874593 | 0.055 | 0.008 | 1.08E-05 | 0 FYB       | 6.875       |
| MSRB32         | 4.56E-10 | 0.4941127 | 0.089 | 0.019 | 1.10E-05 | 0 MSRB3     | 4.684210526 |
| ATP1B33        | 4.88E-10 | 0.9442478 | 0.438 | 0.255 | 1.18E-05 | 0 ATP1B3    | 1.717647059 |
| CFLAR3         | 5.01E-10 | 0.7146374 | 0.541 | 0.34  | 1.21E-05 | 0 CFLAR     | 1.591176471 |
| KIAA1462       | 5.02E-10 | 0.2820317 | 0.034 | 0.003 | 1.21E-05 | 0 KIAA1462  | 11.33333333 |
| BHLHE414       | 5.76E-10 | 0.5064523 | 0.151 | 0.045 | 1.39E-05 | 0 BHLHE41   | 3.355555556 |
| CREM4          | 5.99E-10 | 0.8018861 | 0.247 | 0.1   | 1.44E-05 | 0 CREM      | 2.47        |
| JAZF13         | 6.67E-10 | 0.9221405 | 0.226 | 0.087 | 1.61E-05 | 0 JAZF1     | 2.597701149 |
| RP11-307P5.13  | 7.60E-10 | 0.4701908 | 0.096 | 0.022 | 1.83E-05 | 0 RP11-307P | 4.363636364 |
| GLS4           | 7.71E-10 | 0.6704323 | 0.384 | 0.199 | 1.86E-05 | 0 GLS       | 1.929648241 |
| PRKCA2         | 7.91E-10 | 0.7140154 | 0.192 | 0.066 | 1.91E-05 | 0 PRKCA     | 2.909090909 |
| IFI27          | 8.12E-10 | 0.2744459 | 0.021 | 0.001 | 1.96E-05 | 0 IFI27     | 21          |
| ADAMTS123      | 8.43E-10 | 0.8562494 | 0.048 | 0.006 | 2.03E-05 | 0 ADAMTS12  | 8           |
| C8orf58        | 1.00E-09 | 0.1401616 | 0.034 | 0.003 | 2.41E-05 | 0 C8orf58   | 11.33333333 |
| MCAM3          | 1.07E-09 | 0.5802187 | 0.082 | 0.017 | 2.59E-05 | 0 MCAM      | 4.823529412 |
| FAM135A2       | 1.14E-09 | 0.717743  | 0.185 | 0.065 | 2.75E-05 | 0 FAM135A   | 2.846153846 |
| VWF            | 1.21E-09 | 0.4139631 | 0.048 | 0.007 | 2.92E-05 | 0 VWF       | 6.857142857 |
| RBP14          | 1.38E-09 | 0.4869849 | 0.151 | 0.046 | 3.32E-05 | 0 RBP1      | 3.282608696 |
| RP11-758H9.21  | 1.57E-09 | 0.4128957 | 0.082 | 0.017 | 3.78E-05 | 0 RP11-758H | 4.823529412 |
| CASP101        | 1.66E-09 | 0.1188529 | 0.027 | 0.002 | 4.00E-05 | 0 CASP10    | 13.5        |
| PLVAP1         | 1.70E-09 | 0.5486782 | 0.034 | 0.004 | 4.10E-05 | 0 PLVAP     | 8.5         |
| EPB41L24       | 1.73E-09 | 0.8026054 | 0.26  | 0.112 | 4.18E-05 | 0 EPB41L2   | 2.321428571 |
| CD343          | 1.81E-09 | 0.2468308 | 0.048 | 0.007 | 4.35E-05 | 0 CD34      | 6.857142857 |
| IGFBP71        | 1.85E-09 | 0.7485851 | 0.068 | 0.013 | 4.45E-05 | 0 IGFBP7    | 5.230769231 |
| SLFN111        | 1.85E-09 | 0.1757233 | 0.041 | 0.005 | 4.46E-05 | 0 SLFN11    | 8.2         |
| MZB11          | 1.86E-09 | 0.1783911 | 0.014 | 0.001 | 4.48E-05 | 0 MZB1      | 14          |
| TRAC           | 1.86E-09 | 0.1179751 | 0.014 | 0.001 | 4.50E-05 | 0 TRAC      | 14          |
| CD5            | 1.86E-09 | 0.1007478 | 0.014 | 0.001 | 4.50E-05 | 0 CD5       | 14          |
| FILIP1         | 2.04E-09 | 0.3832197 | 0.048 | 0.007 | 4.91E-05 | 0 FILIP1    | 6.857142857 |
| SAMD93         | 2.19E-09 | 0.2919981 | 0.075 | 0.015 | 5.27E-05 | 0 SAMD9     | 5           |
| HLA-A3         | 2.21E-09 | 1.093307  | 0.507 | 0.318 | 5.34E-05 | 0 HLA-A     | 1.594339623 |
| LIX1L2         | 2.25E-09 | 0.2587064 | 0.062 | 0.01  | 5.43E-05 | 0 LIX1L     | 6.2         |

|              |          |           |       |       |             |              |             |
|--------------|----------|-----------|-------|-------|-------------|--------------|-------------|
| IRAK24       | 2.36E-09 | 0.707854  | 0.288 | 0.128 | 5.68E-05    | 0 IRAK2      | 2.25        |
| REL4         | 2.39E-09 | 0.9180156 | 0.486 | 0.301 | 5.77E-05    | 0 REL        | 1.61461794  |
| PLEKHM32     | 2.44E-09 | 0.4186275 | 0.116 | 0.031 | 5.88E-05    | 0 PLEKHM3    | 3.741935484 |
| EMILIN21     | 2.50E-09 | 0.1120371 | 0.027 | 0.002 | 6.03E-05    | 0 EMILIN2    | 13.5        |
| PCNX4        | 2.62E-09 | 1.049154  | 0.37  | 0.209 | 6.32E-05    | 0 PCNX       | 1.770334928 |
| LINC010601   | 3.05E-09 | 0.689216  | 0.068 | 0.013 | 7.34E-05    | 0 LINC01060  | 5.230769231 |
| LUCAT13      | 3.06E-09 | 0.9643381 | 0.384 | 0.202 | 7.39E-05    | 0 LUCAT1     | 1.900990099 |
| HLA-B4       | 3.43E-09 | 1.044751  | 0.671 | 0.542 | 8.27E-05    | 0 HLA-B      | 1.23800738  |
| GPRASP21     | 3.46E-09 | 0.1420646 | 0.021 | 0.001 | 8.35E-05    | 0 GPRASP2    | 21          |
| PSIP13       | 3.49E-09 | 0.3151953 | 0.082 | 0.017 | 8.41E-05    | 0 PSIP1      | 4.823529412 |
| LRFN51       | 3.61E-09 | 0.4889055 | 0.027 | 0.002 | 8.70E-05    | 0 LRFN5      | 13.5        |
| LYN3         | 4.02E-09 | 0.9916718 | 0.575 | 0.408 | 9.68E-05    | 0 LYN        | 1.409313725 |
| FMN12        | 4.06E-09 | 1.253294  | 0.247 | 0.106 | 9.80E-05    | 0 FMN1       | 2.330188679 |
| TXNDC151     | 4.78E-09 | 0.2647033 | 0.075 | 0.015 | 0.000115353 | 0 TXNDC15    | 5           |
| GNA133       | 4.85E-09 | 0.8863222 | 0.384 | 0.209 | 0.000116891 | 0 GNA13      | 1.837320574 |
| RHBDF23      | 5.05E-09 | 0.3997736 | 0.13  | 0.038 | 0.000121716 | 0 RHBDF2     | 3.421052632 |
| CCL51        | 5.38E-09 | 0.3180968 | 0.068 | 0.013 | 0.00012966  | 0 CCL5       | 5.230769231 |
| SYK4         | 5.42E-09 | 0.4326827 | 0.075 | 0.015 | 0.000130703 | 0 SYK        | 5           |
| LBR3         | 5.46E-09 | 0.3529956 | 0.082 | 0.018 | 0.000131564 | 0 LBR        | 4.555555556 |
| ALDH23       | 5.60E-09 | 0.3680826 | 0.11  | 0.029 | 0.000135043 | 0 ALDH2      | 3.793103448 |
| ZSCAN311     | 5.66E-09 | 0.1563786 | 0.041 | 0.005 | 0.000136568 | 0 ZSCAN31    | 8.2         |
| NRP14        | 6.46E-09 | 0.9972713 | 0.171 | 0.06  | 0.000155819 | 0 NRP1       | 2.85        |
| GAB3         | 6.56E-09 | 0.1011756 | 0.021 | 0.001 | 0.000158167 | 0 GAB3       | 21          |
| KLRB1        | 7.25E-09 | 0.3278001 | 0.014 | 0.001 | 0.000174778 | 0 KLRB1      | 14          |
| PARVG        | 7.25E-09 | 0.1121931 | 0.014 | 0.001 | 0.000174778 | 0 PARVG      | 14          |
| JPH4         | 7.27E-09 | 0.11898   | 0.014 | 0.001 | 0.000175406 | 0 JPH4       | 14          |
| NR4A34       | 7.33E-09 | 0.3936063 | 0.089 | 0.021 | 0.000176714 | 0 NR4A3      | 4.238095238 |
| SDCBP4       | 7.34E-09 | 0.7239315 | 0.733 | 0.617 | 0.00017707  | 0 SDCBP      | 1.188006483 |
| EBI31        | 7.57E-09 | 0.1476966 | 0.034 | 0.004 | 0.000182504 | 0 EBI3       | 8.5         |
| SGK13        | 8.65E-09 | 0.9691857 | 0.24  | 0.105 | 0.0002085   | 0 SGK1       | 2.285714286 |
| BCL2A12      | 1.03E-08 | 0.6426655 | 0.212 | 0.082 | 0.000248532 | 0 BCL2A1     | 2.585365854 |
| DOCK113      | 1.11E-08 | 0.6241602 | 0.103 | 0.027 | 0.000267877 | 0 DOCK11     | 3.814814815 |
| IGDCC42      | 1.20E-08 | 0.1064955 | 0.021 | 0.001 | 0.000290479 | 0 IGDCC4     | 21          |
| FRMD4A3      | 1.22E-08 | 0.8566129 | 0.466 | 0.277 | 0.000294972 | 0 FRMD4A     | 1.682310469 |
| NLRP14       | 1.60E-08 | 0.4220388 | 0.068 | 0.014 | 0.000385652 | 0 NLRP1      | 4.857142857 |
| SORCS32      | 1.62E-08 | 0.2304574 | 0.048 | 0.007 | 0.000390029 | 0 SORCS3     | 6.857142857 |
| SH3RF32      | 1.70E-08 | 0.3759927 | 0.075 | 0.016 | 0.000409652 | 0 SH3RF3     | 4.6875      |
| RP5-1024G6.2 | 1.70E-08 | 0.1261731 | 0.027 | 0.003 | 0.000410599 | 0 RP5-1024G  | 9           |
| SP140        | 1.84E-08 | 0.3998931 | 0.048 | 0.007 | 0.000442958 | 0 SP140      | 6.857142857 |
| FTH16        | 1.95E-08 | 1.265882  | 0.89  | 0.844 | 0.000470781 | 0 FTH1       | 1.05450237  |
| CEP85L3      | 2.01E-08 | 0.3447449 | 0.13  | 0.039 | 0.000483943 | 0 CEP85L     | 3.333333333 |
| FBXL73       | 2.19E-08 | 0.943098  | 0.123 | 0.037 | 0.00052924  | 0 FBXL7      | 3.324324324 |
| TVP23A       | 2.21E-08 | 0.1083423 | 0.034 | 0.004 | 0.000533165 | 0 TVP23A     | 8.5         |
| RASA33       | 2.25E-08 | 0.4481249 | 0.062 | 0.012 | 0.000542984 | 0 RASA3      | 5.166666667 |
| AKR1B12      | 2.44E-08 | 0.6029598 | 0.144 | 0.047 | 0.000587534 | 0 AKR1B1     | 3.063829787 |
| HCLS12       | 2.50E-08 | 0.2149648 | 0.034 | 0.004 | 0.000602998 | 0 HCLS1      | 8.5         |
| CTSK1        | 3.22E-08 | 0.4832361 | 0.048 | 0.008 | 0.000777027 | 0 CTSK       | 6           |
| CAPZB2       | 3.31E-08 | 0.6524982 | 0.356 | 0.189 | 0.000797828 | 0 CAPZB      | 1.883597884 |
| HIP13        | 3.32E-08 | 0.6486067 | 0.219 | 0.092 | 0.00079982  | 0 HIP1       | 2.380434783 |
| EPSTI11      | 3.61E-08 | 0.2335525 | 0.048 | 0.008 | 0.000869737 | 0 EPSTI1     | 6           |
| NPC25        | 3.64E-08 | 1.122563  | 0.568 | 0.485 | 0.000876807 | 0 NPC2       | 1.171134021 |
| RP11-6J21.21 | 3.70E-08 | 0.1162231 | 0.021 | 0.002 | 0.000891624 | 0 RP11-6J21. | 10.5        |



|                |          |           |       |       |             |             |             |
|----------------|----------|-----------|-------|-------|-------------|-------------|-------------|
| FAM102B2       | 3.73E-08 | 0.4203327 | 0.096 | 0.025 | 0.000898604 | 0 FAM102B   | 3.84        |
| RP11-326G21.11 | 3.74E-08 | 0.1307142 | 0.021 | 0.002 | 0.000901664 | 0 RP11-326G | 10.5        |
| MYO15B1        | 3.87E-08 | 0.2929517 | 0.062 | 0.012 | 0.000932765 | 0 MYO15B    | 5.166666667 |
| OAF1           | 4.01E-08 | 0.1479233 | 0.034 | 0.004 | 0.000966743 | 0 OAF       | 8.5         |
| PALD11         | 4.44E-08 | 0.2331634 | 0.027 | 0.003 | 0.001070938 | 0 PALD1     | 9           |
| DMXL22         | 4.56E-08 | 0.5882584 | 0.137 | 0.044 | 0.001098683 | 0 DMXL2     | 3.113636364 |
| ZFYVE281       | 4.73E-08 | 0.398236  | 0.082 | 0.02  | 0.001140483 | 0 ZFYVE28   | 4.1         |
| ATP2B14        | 4.81E-08 | 0.7723644 | 0.219 | 0.093 | 0.001160869 | 0 ATP2B1    | 2.35483871  |
| GOS23          | 4.86E-08 | 0.3460877 | 0.089 | 0.022 | 0.001171995 | 0 GOS2      | 4.045454545 |
| GRB23          | 5.20E-08 | 0.9029263 | 0.308 | 0.162 | 0.001253315 | 0 GRB2      | 1.901234568 |
| TSHZ32         | 5.38E-08 | 0.3676485 | 0.048 | 0.008 | 0.001297211 | 0 TSHZ3     | 6           |
| ADAP21         | 5.94E-08 | 0.1554793 | 0.041 | 0.006 | 0.001431369 | 0 ADAP2     | 6.833333333 |
| CARD164        | 6.30E-08 | 0.4556881 | 0.137 | 0.045 | 0.001517968 | 0 CARD16    | 3.044444444 |
| AC104532.4     | 6.32E-08 | 0.1286685 | 0.021 | 0.002 | 0.001524229 | 0 AC104532. | 10.5        |
| AHRR           | 6.32E-08 | 0.217551  | 0.034 | 0.004 | 0.001524328 | 0 AHRR      | 8.5         |
| ZNF3312        | 6.49E-08 | 0.5573799 | 0.151 | 0.053 | 0.001564132 | 0 ZNF331    | 2.849056604 |
| PLCB13         | 6.89E-08 | 1.091984  | 0.384 | 0.224 | 0.001661091 | 0 PLCB1     | 1.714285714 |
| IL1RAP2        | 6.90E-08 | 0.6546566 | 0.151 | 0.053 | 0.001664665 | 0 IL1RAP    | 2.849056604 |
| CSF2RB1        | 6.96E-08 | 0.1193545 | 0.014 | 0.001 | 0.001678012 | 0 CSF2RB    | 14          |
| DLGAP1-AS2     | 8.01E-08 | 0.1525022 | 0.041 | 0.006 | 0.001931305 | 0 DLGAP1-AS | 6.833333333 |
| HIF1A3         | 8.31E-08 | 1.025621  | 0.582 | 0.442 | 0.002003448 | 0 HIF1A     | 1.316742081 |
| CD41           | 8.35E-08 | 0.1872575 | 0.041 | 0.006 | 0.002014095 | 0 CD4       | 6.833333333 |
| RP11-360L9.42  | 9.04E-08 | 0.5425385 | 0.13  | 0.041 | 0.002180712 | 0 RP11-360L | 3.170731707 |
| SH2D3C1        | 9.38E-08 | 0.203066  | 0.034 | 0.004 | 0.002262723 | 0 SH2D3C    | 8.5         |
| IL23A          | 1.08E-07 | 0.4509677 | 0.041 | 0.006 | 0.002593615 | 0 IL23A     | 6.833333333 |
| NEURL1B1       | 1.20E-07 | 0.1273404 | 0.034 | 0.004 | 0.002897782 | 0 NEURL1B   | 8.5         |
| ARRB2          | 1.35E-07 | 0.5035253 | 0.055 | 0.01  | 0.003265903 | 0 ARRB2     | 5.5         |
| ADAM82         | 1.51E-07 | 0.1623529 | 0.027 | 0.003 | 0.003640889 | 0 ADAM8     | 9           |
| RAB9B1         | 1.55E-07 | 0.121915  | 0.027 | 0.003 | 0.003725543 | 0 RAB9B     | 9           |
| TMEM233        | 1.56E-07 | 0.19192   | 0.021 | 0.002 | 0.003753038 | 0 TMEM233   | 10.5        |
| LINC003092     | 1.56E-07 | 0.1413945 | 0.027 | 0.003 | 0.003767088 | 0 LINC00309 | 9           |
| RAB39A         | 1.57E-07 | 0.118441  | 0.027 | 0.003 | 0.003788029 | 0 RAB39A    | 9           |
| KCNQ1OT14      | 1.60E-07 | 0.7049528 | 0.205 | 0.087 | 0.003862888 | 0 KCNQ1OT1  | 2.356321839 |
| TBC1D22A4      | 1.60E-07 | 0.9176596 | 0.295 | 0.154 | 0.003863347 | 0 TBC1D22A  | 1.915584416 |
| GOLIM43        | 1.62E-07 | 0.2408732 | 0.075 | 0.018 | 0.003895721 | 0 GOLIM4    | 4.166666667 |
| LGALS12        | 1.74E-07 | 1.222879  | 0.192 | 0.081 | 0.004185576 | 0 LGALS1    | 2.37037037  |
| CPM3           | 1.76E-07 | 0.3958174 | 0.103 | 0.03  | 0.004237936 | 0 CPM       | 3.433333333 |
| GRAMD1A4       | 1.80E-07 | 0.7746197 | 0.116 | 0.037 | 0.004339253 | 0 GRAMD1A   | 3.135135135 |
| TG1            | 1.93E-07 | 0.1822499 | 0.055 | 0.01  | 0.004654074 | 0 TG        | 5.5         |
| GPR137B4       | 1.98E-07 | 0.5871715 | 0.13  | 0.044 | 0.004786316 | 0 GPR137B   | 2.954545455 |
| ENPP21         | 2.00E-07 | 0.7546225 | 0.062 | 0.013 | 0.004826693 | 0 ENPP2     | 4.769230769 |
| RASGRF22       | 2.01E-07 | 0.3550028 | 0.048 | 0.008 | 0.00485344  | 0 RASGRF2   | 6           |
| MIR22HG2       | 2.04E-07 | 0.223661  | 0.055 | 0.01  | 0.004926051 | 0 MIR22HG   | 5.5         |
| IL3RA3         | 2.05E-07 | 0.3303698 | 0.068 | 0.015 | 0.004934681 | 0 IL3RA     | 4.533333333 |
| ARAP11         | 2.17E-07 | 0.3086267 | 0.055 | 0.011 | 0.005221974 | 0 ARAP1     | 5           |
| PLIN24         | 2.34E-07 | 0.7656603 | 0.212 | 0.095 | 0.005642272 | 0 PLIN2     | 2.231578947 |
| FLRT21         | 2.41E-07 | 0.2086384 | 0.021 | 0.002 | 0.005814695 | 0 FLRT2     | 10.5        |
| TMEM178A1      | 2.53E-07 | 0.1172128 | 0.021 | 0.002 | 0.006094087 | 0 TMEM178A  | 10.5        |
| WARS3          | 2.54E-07 | 0.5179927 | 0.171 | 0.068 | 0.006123657 | 0 WARS      | 2.514705882 |
| EDA1           | 2.56E-07 | 0.6562212 | 0.164 | 0.063 | 0.006166845 | 0 EDA       | 2.603174603 |
| HIST1H4C5      | 2.89E-07 | 0.738801  | 0.301 | 0.167 | 0.006958642 | 0 HIST1H4C  | 1.80239521  |
| AKT34          | 2.95E-07 | 0.6842761 | 0.514 | 0.346 | 0.007117252 | 0 AKT3      | 1.485549133 |

|                |          |           |       |       |             |                  |             |
|----------------|----------|-----------|-------|-------|-------------|------------------|-------------|
| FTX5           | 3.06E-07 | 0.7002046 | 0.671 | 0.558 | 0.007381603 | 0 FTX            | 1.202508961 |
| RP11-38L15.31  | 3.12E-07 | 0.1390236 | 0.041 | 0.006 | 0.007525166 | 0 RP11-38L15.31  | 6.833333333 |
| STC13          | 3.17E-07 | 1.186148  | 0.137 | 0.048 | 0.007642391 | 0 STC1           | 2.854166667 |
| HIF1A-AS23     | 3.82E-07 | 0.9711974 | 0.281 | 0.144 | 0.009201539 | 0 HIF1A-AS23     | 1.951388889 |
| MIR3142HG2     | 4.11E-07 | 0.2309142 | 0.055 | 0.011 | 0.009916852 | 0 MIR3142HG2     | 5           |
| LAG31          | 4.11E-07 | 0.2027976 | 0.014 | 0.001 | 0.009921494 | 0 LAG3           | 14          |
| UCHL1-AS1      | 4.13E-07 | 0.1083689 | 0.014 | 0.001 | 0.009963394 | 0 UCHL1-AS1      | 14          |
| PTPN93         | 4.20E-07 | 0.4775197 | 0.199 | 0.085 | 0.0101324   | 0 PTPN9          | 2.341176471 |
| DIRC23         | 4.31E-07 | 0.7102818 | 0.151 | 0.058 | 0.01039711  | 0 DIRC2          | 2.603448276 |
| HLA-E3         | 4.74E-07 | 1.127787  | 0.205 | 0.092 | 0.01144151  | 0 HLA-E          | 2.22826087  |
| CCL42          | 5.44E-07 | 0.9577712 | 0.137 | 0.049 | 0.01311332  | 0 CCL4           | 2.795918367 |
| FOXN33         | 5.86E-07 | 0.7573997 | 0.322 | 0.18  | 0.01413513  | 0 FOXN3          | 1.788888889 |
| MT2A2          | 6.15E-07 | 1.288889  | 0.158 | 0.06  | 0.0148278   | 0 MT2A           | 2.633333333 |
| MBNL15         | 6.70E-07 | 1.06172   | 0.534 | 0.408 | 0.01615513  | 0 MBNL1          | 1.308823529 |
| SNX293         | 6.82E-07 | 0.6021097 | 0.212 | 0.098 | 0.01645555  | 0 SNX29          | 2.163265306 |
| RASSF8-AS11    | 6.94E-07 | 0.2747395 | 0.055 | 0.011 | 0.01673845  | 0 RASSF8-AS11    | 5           |
| RP11-557H15.41 | 7.10E-07 | 0.1741802 | 0.034 | 0.005 | 0.01712344  | 0 RP11-557H15.41 | 6.8         |
| CD402          | 7.34E-07 | 0.1273997 | 0.034 | 0.005 | 0.01769838  | 0 CD40           | 6.8         |
| HYAL22         | 7.51E-07 | 0.2017935 | 0.034 | 0.005 | 0.01811506  | 0 HYAL2          | 6.8         |
| RP11-796E2.42  | 8.34E-07 | 0.3414026 | 0.075 | 0.019 | 0.02010925  | 0 RP11-796E2.42  | 3.947368421 |
| PAPSS22        | 8.42E-07 | 0.4146648 | 0.103 | 0.032 | 0.02029712  | 0 PAPSS2         | 3.21875     |
| MDFIC1         | 8.71E-07 | 0.2747782 | 0.048 | 0.009 | 0.02100997  | 0 MDFIC          | 5.333333333 |
| MMP14          | 9.14E-07 | 0.2779284 | 0.055 | 0.011 | 0.02204985  | 0 MMP14          | 5           |
| CTD-2020K17.12 | 9.89E-07 | 0.2255136 | 0.055 | 0.011 | 0.02383782  | 0 CTD-2020K17.12 | 5           |
| ARL4A3         | 1.08E-06 | 0.555926  | 0.24  | 0.118 | 0.02612056  | 0 ARL4A          | 2.033898305 |
| CLEC1A1        | 1.09E-06 | 0.3630177 | 0.075 | 0.02  | 0.02630893  | 0 CLEC1A         | 3.75        |
| IL6R2          | 1.12E-06 | 0.4494859 | 0.164 | 0.066 | 0.02695353  | 0 IL6R           | 2.484848485 |
| TWIST2         | 1.13E-06 | 0.1515608 | 0.021 | 0.002 | 0.02726431  | 0 TWIST2         | 10.5        |
| TIMP14         | 1.13E-06 | 1.045582  | 0.164 | 0.068 | 0.02731865  | 0 TIMP1          | 2.411764706 |
| CTB-113P19.1   | 1.14E-06 | 0.1171075 | 0.021 | 0.002 | 0.02741202  | 0 CTB-113P19.1   | 10.5        |
| TPM32          | 1.17E-06 | 0.5938092 | 0.233 | 0.112 | 0.02827146  | 0 TPM3           | 2.080357143 |
| STX111         | 1.19E-06 | 0.3870501 | 0.082 | 0.023 | 0.0286433   | 0 STX11          | 3.565217391 |
| ATG16L22       | 1.31E-06 | 0.1872815 | 0.048 | 0.009 | 0.03155972  | 0 ATG16L2        | 5.333333333 |
| MYO9B3         | 1.33E-06 | 0.5855463 | 0.329 | 0.187 | 0.03209222  | 0 MYO9B          | 1.759358289 |
| PLCL21         | 1.35E-06 | 0.3901164 | 0.075 | 0.02  | 0.0325183   | 0 PLCL2          | 3.75        |
| LAMP31         | 1.35E-06 | 0.1309526 | 0.027 | 0.003 | 0.03267257  | 0 LAMP3          | 9           |
| SAMHD11        | 1.56E-06 | 0.2001121 | 0.048 | 0.009 | 0.03754433  | 0 SAMHD1         | 5.333333333 |
| AC079305.11    | 1.62E-06 | 0.1213192 | 0.021 | 0.002 | 0.03900175  | 0 AC079305.11    | 10.5        |
| CALCB          | 1.63E-06 | 0.1401379 | 0.021 | 0.002 | 0.03924224  | 0 CALCB          | 10.5        |
| FAM101B        | 1.76E-06 | 0.1024705 | 0.014 | 0.001 | 0.04237754  | 0 FAM101B        | 14          |
| SYN11          | 1.76E-06 | 0.1016498 | 0.014 | 0.001 | 0.04248501  | 0 SYN1           | 14          |
| CXCL111        | 1.80E-06 | 0.286181  | 0.014 | 0.001 | 0.04329942  | 0 CXCL11         | 14          |
| DPYSL22        | 1.83E-06 | 0.6189635 | 0.24  | 0.12  | 0.04408233  | 0 DPYSL2         | 2           |
| PTAFR3         | 1.85E-06 | 0.3387296 | 0.068 | 0.017 | 0.04453327  | 0 PTAFR          | 4           |
| GIMAP22        | 1.86E-06 | 0.1569134 | 0.041 | 0.007 | 0.04487087  | 0 GIMAP2         | 5.857142857 |
