# Supplementary material for: Ductal keratin 15+ luminal progenitors in normal breast exhibit a basal-like breast cancer transcriptomic signature
Source: PubMed Central journal article supplement (PMC9276673; doi:10.1038/s41523-022-00444-8), 2022-07-12
Supplement: 41523_2022_444_MOESM4_ESM.pdf [file 41523_2022_444_MOESM4_ESM.pdf]

## **Supplementary Data 2.**

DEGs encoding cell-surface proteins.

Date include DEGs from Supplementary Data 1, identified in the in silico human surfaceome list of all predicted membrane proteins.

| Cluster | Cell-surface protein encoding genes |
|---------|-------------------------------------|
| 1.1     | PIGR                                |
| 1.1     | KIAA0922                            |
| 1.1     | CXCR4                               |
| 1.1     | LRP6                                |
| 1.1     | GLIPR1                              |
| 1.1     | HCAR2                               |
| 1.1     | FGFR1                               |
| 1.1     | CLDN1                               |
| 1.1     | SLC20A2                             |
| 1.1     | GABRP                               |
| 1.1     | MET                                 |
| 1.1     | SLC9A7                              |
| 1.1     | ATP13A3                             |
| 1.1     | DSG3                                |
| 1.1     | HLA-DRA                             |
| 1.1     | PTPRJ                               |
| 1.1     | TGFBR3                              |
| 1.1     | NTRK2                               |
| 1.1     | TNFRSF11A                           |
| 1.1     | FAS                                 |
| 1.2     | CLDN1                               |
| 1.2     | GLIPR1                              |
| 1.2     | ITGA2                               |
| 1.2     | GABRP                               |
| 1.2     | ZPLD1                               |
| 1.2     | DSG3                                |
| 1.2     | ITGB8                               |
| 1.2     | MET                                 |
| 1.2     | HCAR2                               |
| 1.2     | CDCP1                               |
| 1.2     | PLAUR                               |
| 1.2     | PIGR                                |
| 1.2     | EGFR                                |
| 1.2     | BACE2                               |
| 1.2     | SLC20A2                             |
| 1.2     | CD55                                |
| 1.2     | SLC28A3                             |
| 1.2     | DSG2                                |
| 1.2     | PROM1                               |
| 1.2     | SLC6A14                             |
| 1.2     | VNN1                                |
| 1.2     | EFNA5                               |
| 1.2     | IFNAR2                              |
| 1.2     | SLC39A14                            |
| 1.2     | GPM6B                               |
| 1.3     | SLC12A2                             |

|     |          |
|-----|----------|
| 1.3 | LRP1B    |
| 1.3 | EFNA5    |
| 1.3 | VNN1     |
| 1.3 | EGFR     |
| 1.3 | SEMA6A   |
| 1.3 | PROM1    |
| 1.3 | SLC34A2  |
| 1.3 | VNN3     |
| 1.3 | KIT      |
| 1.3 | PIGR     |
| 1.3 | EVA1C    |
| 1.3 | ITGB8    |
| 1.3 | SLC28A3  |
| 1.3 | LINGO2   |
| 1.3 | CHPT1    |
| 1.3 | SLC26A2  |
| 1.3 | SLC6A14  |
| 1.3 | PLXDC2   |
| 1.3 | TGFBR3   |
| 1.3 | SLC39A14 |
| 1.3 | BACE2    |
| 1.4 | EVA1C    |
| 1.4 | VNN3     |
| 1.4 | CHODL    |
| 1.4 | SLC34A2  |
| 1.4 | PROM1    |
| 1.4 | KIT      |
| 1.4 | DCHS2    |
| 1.4 | EFNA5    |
| 1.4 | CHPT1    |
| 1.4 | SEMA6A   |
| 1.4 | CNTN4    |
| 1.4 | LRP1B    |
| 1.4 | SLC28A3  |
| 1.4 | GABRP    |
| 1.4 | SLC26A2  |
| 1.4 | PLXDC2   |
| 1.4 | SLC39A8  |
| 1.4 | VNN1     |
| 1.4 | PODXL    |
| 1.4 | TLR2     |
| 1.4 | GHR      |
| 1.4 | OSMR     |
| 1.4 | PIGR     |
| 1.4 | SLC12A2  |
| 1.4 | LRIG1    |
| 1.4 | TRABD2B  |

|     |          |
|-----|----------|
| 1.4 | EGFR     |
| 1.4 | SLC39A14 |
| 1.4 | NALCN    |
| 1.4 | RNF150   |
| 1.4 | PLA2R1   |
| 1.4 | SLC11A2  |
| 1.4 | CLEC7A   |
| 1.4 | ITGB8    |
| 1.4 | SGCZ     |
| 1.4 | SLC5A6   |
| 1.4 | CX3CL1   |
| 1.4 | SLC24A3  |
| 1.4 | IFNAR2   |
| 2.1 | AREG     |
| 2.1 | TSPAN5   |
| 2.1 | ADAM32   |
| 2.1 | EREG     |
| 2.1 | ERBB4    |
| 2.1 | ALCAM    |
| 2.1 | ITGAV    |
| 2.1 | EFNA1    |
| 2.1 | SLC2A1   |
| 2.1 | SLC39A6  |
| 2.1 | TFPI     |
| 2.1 | SDC2     |
| 2.1 | ECE1     |
| 2.2 | TNFSF11  |
| 2.2 | F3       |
| 2.2 | SLC39A6  |
| 2.2 | PRLR     |
| 2.2 | AREG     |
| 2.2 | ERBB4    |
| 2.2 | HEPACAM2 |
| 2.2 | SDC2     |
| 2.2 | TSPAN5   |
| 2.2 | ENPP1    |
| 2.2 | SLC7A2   |
| 2.2 | KIAA1324 |
| 2.2 | LPAR3    |
| 2.2 | IL20RA   |
| 2.2 | NRXN3    |
| 2.2 | ERBB2    |
| 2.2 | VTCN1    |
| 2.2 | MEGF9    |
| 2.2 | TSPAN1   |
| 2.2 | ECE1     |
| 2.3 | AREG     |

|     |           |
|-----|-----------|
| 2.3 | PTGER3    |
| 2.3 | SLC39A6   |
| 2.3 | SDC2      |
| 2.3 | TNFSF11   |
| 2.3 | SEMA4A    |
| 2.3 | ADAM32    |
| 2.3 | SLC38A2   |
| 2.3 | TSPAN1    |
| 2.3 | F3        |
| 2.3 | APLP2     |
| 2.3 | KIAA0319  |
| 2.3 | GLRA1     |
| 2.3 | LSAMP     |
| 2.3 | CD164     |
| 2.3 | CNNM4     |
| 2.3 | CD63      |
| 2.3 | PRLR      |
| 2.3 | SLC10A1   |
| 2.3 | EFNA1     |
| 2.3 | TMPRSS11E |
| 2.3 | GRIK4     |
| 2.3 | DDR2      |
| 2.3 | EFNB2     |
| 2.3 | ERBB4     |
| 2.3 | KIAA1324  |
| 2.3 | NUP210L   |
| 2.3 | HEPACAM2  |
| 2.3 | FAM171B   |
| 2.3 | SLC9A1    |
| 2.3 | BAMBI     |
| 2.3 | TSPAN6    |
| 2.3 | TFPI      |
| 2.3 | VTCN1     |
| 2.3 | LDLR      |
| 2.3 | LPAR3     |
| 2.3 | GUCY2C    |
| 2.3 | FAT1      |
| 2.4 | SLC38A2   |
| 2.4 | TFPI      |
| 2.4 | AREG      |
| 2.4 | ITGAV     |
| 2.4 | SLC39A10  |
| 2.4 | CD9       |
| 2.4 | ALCAM     |
| 2.4 | ANO6      |
| 2.4 | ERBB4     |
| 2.4 | TPBG      |

|     |          |
|-----|----------|
| 2.4 | GPRC5A   |
| 2.4 | LSAMP    |
| 2.4 | CLSTN2   |
| 2.4 | TSPAN5   |
| 2.4 | PTPRM    |
| 2.4 | CD63     |
| 2.4 | ATP2B4   |
| 2.4 | EREG     |
| 2.4 | LYPD6B   |
| 2.4 | TGFBR1   |
| 2.4 | FAT1     |
| 2.4 | ADAM10   |
| 2.5 | TSPAN1   |
| 2.5 | SLC7A2   |
| 2.5 | ERBB4    |
| 2.5 | ALCAM    |
| 2.5 | TFPI     |
| 2.5 | EREG     |
| 2.5 | LYPD6B   |
| 2.5 | ENPP1    |
| 2.5 | SLC38A2  |
| 2.5 | PRLR     |
| 2.5 | CD9      |
| 2.5 | TPCN1    |
| 2.5 | PTPRM    |
| 2.5 | SEMA4B   |
| 2.5 | ITFG1    |
| 2.5 | LSAMP    |
| 2.5 | CD63     |
| 2.5 | ABCC3    |
| 2.5 | ITGA3    |
| 2.5 | ITGAV    |
| 2.5 | ADAM10   |
| 2.5 | SLC44A4  |
| 2.6 | EFNA1    |
| 2.6 | EREG     |
| 2.6 | ALCAM    |
| 2.6 | LSAMP    |
| 2.6 | ITGB6    |
| 2.6 | SLC22A23 |
| 2.6 | CX3CL1   |
| 2.6 | TSPAN5   |
| 2.6 | ECE1     |
| 2.6 | IFNGR2   |
| 2.6 | ICAM1    |
| 2.6 | ITGAV    |
| 2.6 | PLAUR    |

|     |          |
|-----|----------|
| 2.6 | SPPL2A   |
| 2.6 | TFPI     |
| 2.6 | ANO6     |
| 3   | SLC4A7   |
| 3   | IGSF1    |
| 3   | SLC39A6  |
| 3   | GLRA3    |
| 3   | TSPAN5   |
| 3   | CA12     |
| 0   | HLA-DRA  |
| 0   | CD74     |
| 0   | HLA-DRB1 |
| 0   | CSF2RA   |
| 0   | HLA-DQA1 |
| 0   | PLXDC2   |
| 0   | SLC1A3   |
| 0   | CD83     |
| 0   | GPR183   |
| 0   | ADAM28   |
| 0   | PTPRC    |
| 0   | PKD2     |
| 0   | SLC2A3   |
| 0   | CD53     |
| 0   | PECAM1   |
| 0   | HLA-DRB5 |
| 0   | HLA-DPB1 |
| 0   | MSR1     |
| 0   | HLA-DPA1 |
| 0   | NRP2     |
| 0   | ATP13A3  |
| 0   | LPAR6    |
| 0   | ENTPD1   |
| 0   | HLA-E    |
| 0   | C5AR1    |
| 0   | HLA-A    |
| 0   | ABCA1    |
| 0   | CLMP     |
| 0   | IL2RA    |
| 0   | PCNX     |
| 0   | PLXNC1   |
| 0   | NRP1     |
| 0   | TNFRSF1B |
| 0   | ATP1B3   |
| 0   | SLC8A1   |
| 0   | CACNA1C  |
| 0   | ROBO1    |
| 0   | HAVCR2   |

|   |          |
|---|----------|
| 0 | FCGR2A   |
| 0 | GPNMB    |
| 0 | AXL      |
| 0 | GJA1     |
| 0 | DIRC2    |
| 0 | CD86     |
| 0 | PILRA    |
| 0 | CALCRL   |
| 0 | EDA      |
| 0 | IL1RAP   |
| 0 | CD80     |
| 0 | IL15RA   |
| 0 | C3AR1    |
| 0 | GPR137B  |
| 0 | HLA-DQB1 |
| 0 | MCAM     |
| 0 | PLVAP    |
| 0 | P2RX7    |
| 0 | ENG      |
| 0 | PTGER4   |
| 0 | MERTK    |
| 0 | HLA-DQA2 |
| 0 | FLT1     |
