# Supplementary material for: Ductal keratin 15+ luminal progenitors in normal breast exhibit a basal-like breast cancer transcriptomic signature
Source: PubMed Central journal article supplement (PMC9276673; doi:10.1038/s41523-022-00444-8), 2022-07-12
Supplement: 41523_2022_444_MOESM5_ESM.pdf [file 41523_2022_444_MOESM5_ESM.pdf]

|           | p_val | avg_log2FC   | pct.1 | pct.2 | p_val_adj | cluster | gene       |
|-----------|-------|--------------|-------|-------|-----------|---------|------------|
| RPL10     | 0     | 1.819908231  | 0.949 | 0.912 | 0         | lobular | RPL10      |
| RPS3      | 0     | 1.81604144   | 0.884 | 0.843 | 0         | lobular | RPS3       |
| RPS11     | 0     | 1.653818756  | 0.894 | 0.564 | 0         | lobular | RPS11      |
| TMSB10    | 0     | 1.579126235  | 0.878 | 0.491 | 0         | lobular | TMSB10     |
| RPS12     | 0     | 1.41506119   | 0.737 | 0.503 | 0         | lobular | RPS12      |
| DIO2      | 0     | 1.371056782  | 0.31  | 0.083 | 0         | lobular | DIO2       |
| RPL19     | 0     | 1.369488293  | 0.93  | 0.855 | 0         | lobular | RPL19      |
| RPLP0     | 0     | 1.33754745   | 0.91  | 0.794 | 0         | lobular | RPLP0      |
| HPX       | 0     | 1.22775497   | 0.304 | 0.07  | 0         | lobular | HPX        |
| ANKRD30A  | 0     | 1.20772945   | 0.6   | 0.263 | 0         | lobular | ANKRD30A   |
| PTHLH     | 0     | 1.178957482  | 0.331 | 0.081 | 0         | lobular | PTHLH      |
| EIF2B5    | 0     | 1.151714614  | 0.55  | 0.315 | 0         | lobular | EIF2B5     |
| ERBB4     | 0     | 1.137604686  | 0.605 | 0.309 | 0         | lobular | ERBB4      |
| RPL10A    | 0     | 1.129483999  | 0.799 | 0.582 | 0         | lobular | RPL10A     |
| FTL       | 0     | 1.113596813  | 0.655 | 0.326 | 0         | lobular | FTL        |
| NBEAL1    | 0     | 1.055255649  | 0.828 | 0.529 | 0         | lobular | NBEAL1     |
| AREG      | 0     | 1.04445651   | 0.561 | 0.272 | 0         | lobular | AREG       |
| RPS18     | 0     | 0.988999102  | 0.756 | 0.436 | 0         | lobular | RPS18      |
| GNAS      | 0     | 0.977566622  | 0.839 | 0.61  | 0         | lobular | GNAS       |
| SERF2     | 0     | 0.956735644  | 0.527 | 0.176 | 0         | lobular | SERF2      |
| AMBRA1    | 0     | 0.955761452  | 0.787 | 0.494 | 0         | lobular | AMBRA1     |
| RPL15     | 0     | 0.949047938  | 0.867 | 0.631 | 0         | lobular | RPL15      |
| ACTG1     | 0     | 0.910288446  | 0.8   | 0.601 | 0         | lobular | ACTG1      |
| GNB2L1    | 0     | 0.905572278  | 0.772 | 0.506 | 0         | lobular | GNB2L1     |
| COX4I1    | 0     | 0.871950883  | 0.839 | 0.666 | 0         | lobular | COX4I1     |
| RPS8      | 0     | 0.845433614  | 0.828 | 0.587 | 0         | lobular | RPS8       |
| OST4      | 0     | 0.832455471  | 0.519 | 0.244 | 0         | lobular | OST4       |
| MT-ND1    | 0     | 0.577968263  | 0.991 | 0.961 | 0         | lobular | MT-ND1     |
| RPS14     | 0     | 0.558013124  | 0.519 | 0.234 | 0         | lobular | RPS14      |
| TPT1      | 0     | 0.540946218  | 0.907 | 0.761 | 0         | lobular | TPT1       |
| MT-ATP6   | 0     | 0.534050557  | 0.995 | 0.984 | 0         | lobular | MT-ATP6    |
| RPL37A    | 0     | -0.406225757 | 0.971 | 0.98  | 0         | lobular | RPL37A     |
| EEF1A1    | 0     | -0.481011136 | 0.97  | 0.983 | 0         | lobular | EEF1A1     |
| RPL39     | 0     | -0.509772286 | 0.871 | 0.944 | 0         | lobular | RPL39      |
| RPL34     | 0     | -0.592745866 | 0.975 | 0.983 | 0         | lobular | RPL34      |
| KIZ-AS1   | 0     | -0.596703007 | 0.802 | 0.914 | 0         | lobular | KIZ-AS1    |
| LINC00486 | 0     | -0.61251405  | 0.984 | 0.993 | 0         | lobular | LINC00486  |
| SLC47A1   | 0     | -0.641508596 | 0.863 | 0.952 | 0         | lobular | SLC47A1    |
| RPL24     | 0     | -0.676667684 | 0.894 | 0.954 | 0         | lobular | RPL24      |
| PLEKHA6   | 0     | -0.716527974 | 0.787 | 0.91  | 0         | lobular | PLEKHA6    |
| SKP1      | 0     | -0.718890034 | 0.767 | 0.875 | 0         | lobular | SKP1       |
| ADGRL3-AS | 0     | -0.729782258 | 0.521 | 0.729 | 0         | lobular | ADGRL3-AS1 |

|           |           |              |       |       |           |         |               |
|-----------|-----------|--------------|-------|-------|-----------|---------|---------------|
| RBFOX2    | 0         | -0.732646875 | 0.94  | 0.971 | 0         | lobular | RBFOX2        |
| NPM1      | 0         | -0.749023387 | 0.642 | 0.836 | 0         | lobular | NPM1          |
| ANXA2     | 0         | -0.774807154 | 0.917 | 0.943 | 0         | lobular | ANXA2         |
| SON       | 0         | -0.813488169 | 0.623 | 0.777 | 0         | lobular | SON           |
| SEC61G    | 0         | -0.862317764 | 0.524 | 0.727 | 0         | lobular | SEC61G        |
| RPS3A     | 0         | -0.890992547 | 0.869 | 0.95  | 0         | lobular | RPS3A         |
| RP11-356C | 0         | -0.908074306 | 0.078 | 0.27  | 0         | lobular | RP11-356C4.5  |
| MET       | 0         | -0.917931571 | 0.146 | 0.365 | 0         | lobular | MET           |
| RP11-795H | 0         | -1.002727826 | 0.273 | 0.512 | 0         | lobular | RP11-795H16.3 |
| UBC       | 0         | -1.014091205 | 0.861 | 0.963 | 0         | lobular | UBC           |
| SOD2      | 0         | -1.030661906 | 0.714 | 0.885 | 0         | lobular | SOD2          |
| GRB14     | 0         | -1.067678487 | 0.323 | 0.556 | 0         | lobular | GRB14         |
| RPL21     | 0         | -1.069539434 | 0.822 | 0.951 | 0         | lobular | RPL21         |
| PTEN      | 0         | -1.072595202 | 0.759 | 0.89  | 0         | lobular | PTEN          |
| TSHZ2     | 0         | -1.077660036 | 0.163 | 0.397 | 0         | lobular | TSHZ2         |
| PSME2     | 0         | -1.089003029 | 0.198 | 0.456 | 0         | lobular | PSME2         |
| EPB42     | 0         | -1.099491879 | 0.869 | 0.94  | 0         | lobular | EPB42         |
| PCNXL2    | 0         | -1.117886167 | 0.705 | 0.864 | 0         | lobular | PCNXL2        |
| FAM172A   | 0         | -1.129217956 | 0.541 | 0.749 | 0         | lobular | FAM172A       |
| PGK1      | 0         | -1.153963297 | 0.465 | 0.709 | 0         | lobular | PGK1          |
| LTF       | 0         | -1.189813971 | 0.244 | 0.513 | 0         | lobular | LTF           |
| ALDH1A3   | 0         | -1.206707653 | 0.18  | 0.441 | 0         | lobular | ALDH1A3       |
| ANKRD36C  | 0         | -1.213598799 | 0.356 | 0.633 | 0         | lobular | ANKRD36C      |
| STEAP1B   | 0         | -1.243422608 | 0.922 | 0.954 | 0         | lobular | STEAP1B       |
| SDCBP     | 0         | -1.275730213 | 0.528 | 0.77  | 0         | lobular | SDCBP         |
| RCAN1     | 0         | -1.29291809  | 0.311 | 0.54  | 0         | lobular | RCAN1         |
| AKT3      | 0         | -1.347825087 | 0.231 | 0.543 | 0         | lobular | AKT3          |
| B2M       | 0         | -1.35009724  | 0.963 | 0.986 | 0         | lobular | B2M           |
| PDE4B     | 0         | -1.521512584 | 0.411 | 0.698 | 0         | lobular | PDE4B         |
| FAM177B   | 0         | -1.657631728 | 0.375 | 0.693 | 0         | lobular | FAM177B       |
| SLPI      | 0         | -1.787375225 | 0.414 | 0.781 | 0         | lobular | SLPI          |
| ANXA1     | 0         | -1.812768301 | 0.514 | 0.771 | 0         | lobular | ANXA1         |
| PTN       | 0         | -2.024538586 | 0.018 | 0.275 | 0         | lobular | PTN           |
| TNFAIP6   | 0         | -2.151492186 | 0.114 | 0.357 | 0         | lobular | TNFAIP6       |
| MGP       | 0         | -2.262830937 | 0.74  | 0.952 | 0         | lobular | MGP           |
| CCL2      | 0         | -2.725122155 | 0.148 | 0.447 | 0         | lobular | CCL2          |
| HINT1     | 7.47E-306 | 0.728819844  | 0.68  | 0.472 | 1.80E-301 | lobular | HINT1         |
| EIF4A2    | 5.87E-304 | -0.785508174 | 0.644 | 0.787 | 1.41E-299 | lobular | EIF4A2        |
| PI3       | 7.87E-300 | -1.72874024  | 0.078 | 0.264 | 1.90E-295 | lobular | PI3           |
| GCNT2     | 2.02E-296 | 1.073512747  | 0.537 | 0.294 | 4.87E-292 | lobular | GCNT2         |
| PSMA4     | 2.62E-296 | -0.906113528 | 0.363 | 0.571 | 6.33E-292 | lobular | PSMA4         |
| MT-ND2    | 3.00E-296 | 0.425266432  | 0.988 | 0.959 | 7.23E-292 | lobular | MT-ND2        |
| SLC25A37  | 7.42E-296 | -1.012555721 | 0.298 | 0.533 | 1.79E-291 | lobular | SLC25A37      |
| EREG      | 1.91E-295 | 1.129437377  | 0.349 | 0.119 | 4.60E-291 | lobular | EREG          |
| RPS20     | 2.44E-295 | 0.931541542  | 0.924 | 0.925 | 5.89E-291 | lobular | RPS20         |
| PRSS23    | 8.79E-295 | 0.927162491  | 0.304 | 0.087 | 2.12E-290 | lobular | PRSS23        |
| RPL35     | 2.23E-292 | 0.547413043  | 0.371 | 0.12  | 5.38E-288 | lobular | RPL35         |

|           |           |              |       |       |           |         |            |
|-----------|-----------|--------------|-------|-------|-----------|---------|------------|
| PTMA      | 9.27E-285 | 0.70340638   | 0.703 | 0.487 | 2.23E-280 | lobular | PTMA       |
| C8orf4    | 2.34E-284 | 0.70153973   | 0.635 | 0.332 | 5.64E-280 | lobular | C8orf4     |
| ALCAM     | 1.91E-279 | 1.006126082  | 0.597 | 0.375 | 4.62E-275 | lobular | ALCAM      |
| MT-CO3    | 4.71E-276 | 0.388237544  | 0.997 | 0.992 | 1.13E-271 | lobular | MT-CO3     |
| CPEB2     | 5.00E-274 | 0.918324418  | 0.397 | 0.167 | 1.21E-269 | lobular | CPEB2      |
| PRDX1     | 5.92E-274 | -0.869905189 | 0.637 | 0.765 | 1.43E-269 | lobular | PRDX1      |
| FAM129A   | 7.40E-272 | -1.19688608  | 0.197 | 0.402 | 1.79E-267 | lobular | FAM129A    |
| SLC26A3   | 2.34E-264 | -0.696763643 | 0.746 | 0.864 | 5.65E-260 | lobular | SLC26A3    |
| EFHD1     | 6.92E-264 | 0.853468492  | 0.386 | 0.162 | 1.67E-259 | lobular | EFHD1      |
| AFF3      | 3.93E-261 | 1.109166937  | 0.426 | 0.199 | 9.49E-257 | lobular | AFF3       |
| ARRDC3    | 2.60E-256 | -0.864813579 | 0.305 | 0.519 | 6.27E-252 | lobular | ARRDC3     |
| SEC62     | 5.01E-255 | -0.643444507 | 0.511 | 0.693 | 1.21E-250 | lobular | SEC62      |
| POMP      | 2.82E-252 | -0.688236785 | 0.579 | 0.723 | 6.80E-248 | lobular | POMP       |
| TNC       | 6.45E-252 | 0.980565083  | 0.415 | 0.197 | 1.55E-247 | lobular | TNC        |
| HSP90AB1  | 1.51E-249 | -0.582403055 | 0.807 | 0.895 | 3.65E-245 | lobular | HSP90AB1   |
| RPS7      | 1.32E-247 | -0.339920161 | 0.889 | 0.963 | 3.18E-243 | lobular | RPS7       |
| H2AFZ     | 4.11E-246 | 0.742461407  | 0.733 | 0.568 | 9.92E-242 | lobular | H2AFZ      |
| EFNA1     | 5.17E-246 | 0.902050068  | 0.316 | 0.115 | 1.25E-241 | lobular | EFNA1      |
| MYBPC1    | 1.35E-245 | 1.038135522  | 0.311 | 0.106 | 3.25E-241 | lobular | MYBPC1     |
| BIRC3     | 4.91E-244 | -0.74761515  | 0.543 | 0.73  | 1.18E-239 | lobular | BIRC3      |
| RAB11FIP1 | 1.68E-243 | 0.930657497  | 0.781 | 0.658 | 4.04E-239 | lobular | RAB11FIP1  |
| CXCL13    | 5.97E-243 | 0.648141877  | 0.5   | 0.269 | 1.44E-238 | lobular | CXCL13     |
| KIAA1324  | 1.14E-238 | 0.702053588  | 0.304 | 0.106 | 2.75E-234 | lobular | KIAA1324   |
| RPL9      | 8.72E-237 | -0.666902878 | 0.508 | 0.675 | 2.10E-232 | lobular | RPL9       |
| SMIM14    | 1.82E-236 | 0.781861995  | 0.48  | 0.269 | 4.39E-232 | lobular | SMIM14     |
| TBX3      | 2.11E-236 | 0.798212627  | 0.348 | 0.145 | 5.09E-232 | lobular | TBX3       |
| RPS6      | 4.18E-235 | -0.40453666  | 0.974 | 0.985 | 1.01E-230 | lobular | RPS6       |
| MAML2     | 4.28E-234 | -0.787481138 | 0.336 | 0.554 | 1.03E-229 | lobular | MAML2      |
| GLIS3     | 2.35E-231 | -0.801683136 | 0.099 | 0.265 | 5.66E-227 | lobular | GLIS3      |
| SLC28A3   | 4.17E-231 | -0.719107526 | 0.113 | 0.286 | 1.01E-226 | lobular | SLC28A3    |
| BTG1      | 1.39E-230 | 0.69733317   | 0.655 | 0.461 | 3.35E-226 | lobular | BTG1       |
| TSPAN5    | 2.32E-230 | 0.859026918  | 0.389 | 0.178 | 5.61E-226 | lobular | TSPAN5     |
| RASGEF1B  | 1.14E-229 | -0.541126374 | 0.859 | 0.947 | 2.76E-225 | lobular | RASGEF1B   |
| ADAMTS9   | 1.36E-229 | -1.003982756 | 0.144 | 0.329 | 3.29E-225 | lobular | ADAMTS9    |
| ST6GALNAI | 5.46E-228 | -0.975553795 | 0.122 | 0.297 | 1.32E-223 | lobular | ST6GALNAC5 |
| RNF181    | 6.48E-228 | -0.702127179 | 0.315 | 0.51  | 1.56E-223 | lobular | RNF181     |
| FXYD3     | 1.44E-225 | 0.739965568  | 0.704 | 0.518 | 3.47E-221 | lobular | FXYD3      |
| SLC7A2    | 6.79E-225 | 0.771745132  | 0.38  | 0.173 | 1.64E-220 | lobular | SLC7A2     |
| C15orf48  | 1.16E-224 | -1.303795184 | 0.436 | 0.606 | 2.80E-220 | lobular | C15orf48   |
| GABRP     | 5.48E-223 | -0.873785178 | 0.195 | 0.385 | 1.32E-218 | lobular | GABRP      |
| SNU13     | 3.13E-222 | 0.64135365   | 0.556 | 0.347 | 7.55E-218 | lobular | SNU13      |
| UGCG      | 3.04E-220 | 0.679530662  | 0.569 | 0.36  | 7.34E-216 | lobular | UGCG       |
| HNRNPA1   | 4.60E-219 | -0.665213457 | 0.713 | 0.836 | 1.11E-214 | lobular | HNRNPA1    |
| CPE       | 3.62E-211 | 0.738412275  | 0.273 | 0.094 | 8.73E-207 | lobular | CPE        |
| FGF13     | 7.94E-208 | 0.860223233  | 0.529 | 0.33  | 1.91E-203 | lobular | FGF13      |
| RPL11     | 2.21E-207 | -0.309488245 | 0.947 | 0.98  | 5.32E-203 | lobular | RPL11      |
| DYNLRB1   | 7.63E-205 | 0.557545789  | 0.391 | 0.186 | 1.84E-200 | lobular | DYNLRB1    |

|           |           |              |       |       |           |         |               |
|-----------|-----------|--------------|-------|-------|-----------|---------|---------------|
| MAP3K13   | 3.14E-204 | -0.780528994 | 0.566 | 0.715 | 7.58E-200 | lobular | MAP3K13       |
| SOX4      | 4.06E-203 | 0.454278113  | 0.897 | 0.743 | 9.78E-199 | lobular | SOX4          |
| RPS17     | 9.15E-202 | -0.384511078 | 0.927 | 0.964 | 2.21E-197 | lobular | RPS17         |
| RPS27A    | 3.48E-201 | -0.273840503 | 0.962 | 0.985 | 8.39E-197 | lobular | RPS27A        |
| RPL37     | 4.54E-200 | -0.333427488 | 0.933 | 0.967 | 1.09E-195 | lobular | RPL37         |
| ANKS1B    | 1.05E-199 | 0.768393564  | 0.536 | 0.338 | 2.52E-195 | lobular | ANKS1B        |
| SELK      | 9.39E-199 | -0.601320794 | 0.553 | 0.711 | 2.26E-194 | lobular | SELK          |
| PSMA3     | 2.78E-198 | -0.672356934 | 0.272 | 0.452 | 6.71E-194 | lobular | PSMA3         |
| STAT5B    | 4.42E-196 | 0.675069398  | 0.407 | 0.211 | 1.06E-191 | lobular | STAT5B        |
| APBB2     | 3.66E-191 | 0.786350288  | 0.326 | 0.147 | 8.81E-187 | lobular | APBB2         |
| LINGO1    | 1.31E-190 | -0.48281975  | 0.86  | 0.938 | 3.16E-186 | lobular | LINGO1        |
| DAPP1     | 6.51E-188 | -0.770088616 | 0.181 | 0.347 | 1.57E-183 | lobular | DAPP1         |
| FBLN5     | 3.24E-184 | -1.165776883 | 0.112 | 0.259 | 7.82E-180 | lobular | FBLN5         |
| NDRG1     | 2.62E-183 | -0.749438558 | 0.286 | 0.465 | 6.32E-179 | lobular | NDRG1         |
| MAP3K1    | 3.19E-183 | 0.754777275  | 0.53  | 0.342 | 7.69E-179 | lobular | MAP3K1        |
| EPS8      | 4.78E-183 | -0.78619943  | 0.257 | 0.428 | 1.15E-178 | lobular | EPS8          |
| RPL31     | 2.16E-181 | -0.39557886  | 0.905 | 0.958 | 5.22E-177 | lobular | RPL31         |
| ITGAV     | 6.23E-179 | 0.672675221  | 0.472 | 0.284 | 1.50E-174 | lobular | ITGAV         |
| COMMD6    | 3.98E-178 | 0.543039763  | 0.428 | 0.236 | 9.60E-174 | lobular | COMMD6        |
| ACTN1     | 1.59E-177 | 0.65542962   | 0.415 | 0.226 | 3.83E-173 | lobular | ACTN1         |
| SAA1      | 9.97E-177 | 0.30023426   | 0.681 | 0.816 | 2.40E-172 | lobular | SAA1          |
| CCL20     | 3.93E-176 | -2.082814658 | 0.129 | 0.277 | 9.48E-172 | lobular | CCL20         |
| CALD1     | 1.76E-175 | -0.902221841 | 0.233 | 0.409 | 4.23E-171 | lobular | CALD1         |
| PSMB7     | 2.46E-175 | -0.639444538 | 0.394 | 0.554 | 5.92E-171 | lobular | PSMB7         |
| PSMC1     | 8.40E-175 | -0.596301598 | 0.218 | 0.384 | 2.03E-170 | lobular | PSMC1         |
| GNA12     | 2.83E-174 | -0.652016769 | 0.239 | 0.404 | 6.83E-170 | lobular | GNA12         |
| TAGLN2    | 2.90E-173 | 0.480140323  | 0.284 | 0.114 | 6.99E-169 | lobular | TAGLN2        |
| MYL12A    | 1.24E-172 | -0.53777542  | 0.851 | 0.895 | 3.00E-168 | lobular | MYL12A        |
| CTSB      | 8.21E-172 | 0.626395151  | 0.357 | 0.183 | 1.98E-167 | lobular | CTSB          |
| RP1-78O14 | 5.39E-171 | 0.876106024  | 0.265 | 0.106 | 1.30E-166 | lobular | RP1-78O14.1   |
| CD59      | 1.01E-169 | -0.686050045 | 0.874 | 0.897 | 2.44E-165 | lobular | CD59          |
| ELOVL5    | 1.02E-169 | 0.810120108  | 0.362 | 0.188 | 2.46E-165 | lobular | ELOVL5        |
| RP11-608O | 1.06E-169 | -0.631946125 | 0.476 | 0.645 | 2.55E-165 | lobular | RP11-608O21.1 |
| ARHGAP26  | 4.21E-169 | -0.595104939 | 0.611 | 0.761 | 1.01E-164 | lobular | ARHGAP26      |
| CA8       | 1.04E-168 | -0.791629386 | 0.177 | 0.336 | 2.50E-164 | lobular | CA8           |
| COX7C     | 1.01E-167 | -0.346659587 | 0.856 | 0.902 | 2.43E-163 | lobular | COX7C         |
| RPL30     | 1.82E-166 | -0.297807521 | 0.941 | 0.974 | 4.39E-162 | lobular | RPL30         |
| SEMA3C    | 4.42E-166 | 0.751627584  | 0.346 | 0.174 | 1.07E-161 | lobular | SEMA3C        |
| LYN       | 7.63E-166 | -0.783722607 | 0.347 | 0.515 | 1.84E-161 | lobular | LYN           |
| NEBL      | 2.08E-165 | 0.654932969  | 0.72  | 0.571 | 5.01E-161 | lobular | NEBL          |
| DUSP16    | 7.36E-165 | 0.624347037  | 0.491 | 0.31  | 1.77E-160 | lobular | DUSP16        |
| RPLP1     | 6.91E-164 | 0.278187617  | 0.359 | 0.174 | 1.67E-159 | lobular | RPLP1         |
| RPL23     | 4.93E-163 | -0.350625652 | 0.899 | 0.945 | 1.19E-158 | lobular | RPL23         |
| GSTM3     | 4.67E-162 | 0.885069579  | 0.394 | 0.222 | 1.13E-157 | lobular | GSTM3         |
| DNAJC12   | 1.51E-161 | 0.551734973  | 0.467 | 0.268 | 3.63E-157 | lobular | DNAJC12       |
| EFNA5     | 1.61E-161 | -0.728056884 | 0.221 | 0.385 | 3.88E-157 | lobular | EFNA5         |
| RPL12     | 2.38E-161 | 0.540548362  | 0.352 | 0.18  | 5.75E-157 | lobular | RPL12         |

|          |           |              |       |       |           |         |          |
|----------|-----------|--------------|-------|-------|-----------|---------|----------|
| MT-ND4   | 1.01E-160 | 0.324124623  | 0.995 | 0.991 | 2.43E-156 | lobular | MT-ND4   |
| SLC39A6  | 1.82E-159 | 0.577589293  | 0.369 | 0.195 | 4.39E-155 | lobular | SLC39A6  |
| RPS9     | 2.00E-158 | 0.300883311  | 0.295 | 0.123 | 4.83E-154 | lobular | RPS9     |
| RSL24D1  | 2.40E-158 | -0.486832265 | 0.499 | 0.663 | 5.79E-154 | lobular | RSL24D1  |
| SLC27A4  | 2.82E-156 | -0.840966834 | 0.656 | 0.787 | 6.80E-152 | lobular | SLC27A4  |
| PSD3     | 1.83E-154 | 0.701994758  | 0.412 | 0.242 | 4.42E-150 | lobular | PSD3     |
| CYP7B1   | 2.76E-154 | -1.000354873 | 0.177 | 0.323 | 6.66E-150 | lobular | CYP7B1   |
| NCEH1    | 6.38E-154 | 0.746132164  | 0.476 | 0.313 | 1.54E-149 | lobular | NCEH1    |
| SUB1     | 1.02E-152 | -0.503317303 | 0.591 | 0.718 | 2.47E-148 | lobular | SUB1     |
| NACA     | 1.25E-152 | -0.268387352 | 0.887 | 0.945 | 3.01E-148 | lobular | NACA     |
| GAPDH    | 3.79E-152 | 0.44928616   | 0.632 | 0.457 | 9.14E-148 | lobular | GAPDH    |
| ERGIC3   | 3.93E-152 | 0.530297915  | 0.39  | 0.221 | 9.48E-148 | lobular | ERGIC3   |
| INSIG2   | 5.38E-152 | -0.61660419  | 0.158 | 0.303 | 1.30E-147 | lobular | INSIG2   |
| SSR3     | 4.93E-151 | -0.58985524  | 0.387 | 0.542 | 1.19E-146 | lobular | SSR3     |
| GLCCI1   | 7.04E-151 | 0.728450167  | 0.365 | 0.2   | 1.70E-146 | lobular | GLCCI1   |
| LUCAT1   | 3.73E-149 | -0.637170112 | 0.149 | 0.296 | 8.99E-145 | lobular | LUCAT1   |
| LIPH     | 3.78E-149 | -1.104610882 | 0.257 | 0.401 | 9.12E-145 | lobular | LIPH     |
| RPL35A   | 1.09E-148 | -0.282018205 | 0.942 | 0.977 | 2.64E-144 | lobular | RPL35A   |
| XBP1     | 2.05E-148 | 0.746720838  | 0.455 | 0.289 | 4.95E-144 | lobular | XBP1     |
| PHLDB2   | 4.67E-148 | 0.647152125  | 0.484 | 0.315 | 1.13E-143 | lobular | PHLDB2   |
| ZFP36L2  | 1.06E-147 | 0.580034539  | 0.441 | 0.26  | 2.56E-143 | lobular | ZFP36L2  |
| TBC1D9   | 9.49E-147 | 0.565678292  | 0.517 | 0.34  | 2.29E-142 | lobular | TBC1D9   |
| DSTN     | 1.48E-146 | 0.571387199  | 0.645 | 0.486 | 3.57E-142 | lobular | DSTN     |
| SYPL1    | 2.81E-146 | -0.545858312 | 0.315 | 0.469 | 6.79E-142 | lobular | SYPL1    |
| TMEM2    | 6.22E-146 | 0.705502468  | 0.412 | 0.244 | 1.50E-141 | lobular | TMEM2    |
| PIGR     | 9.70E-146 | -0.798067409 | 0.193 | 0.345 | 2.34E-141 | lobular | PIGR     |
| HSP90AA1 | 1.69E-144 | -0.428916187 | 0.829 | 0.898 | 4.07E-140 | lobular | HSP90AA1 |
| PVRL2    | 6.34E-144 | 0.594161244  | 0.346 | 0.185 | 1.53E-139 | lobular | PVRL2    |
| SNRPB2   | 7.90E-144 | -0.536304124 | 0.288 | 0.441 | 1.90E-139 | lobular | SNRPB2   |
| SRRM1    | 1.61E-143 | -0.508936276 | 0.483 | 0.629 | 3.89E-139 | lobular | SRRM1    |
| GLRX     | 2.14E-143 | -0.720974518 | 0.232 | 0.384 | 5.15E-139 | lobular | GLRX     |
| MORF4L1  | 4.26E-143 | -0.4640838   | 0.589 | 0.703 | 1.03E-138 | lobular | MORF4L1  |
| MDH1     | 5.42E-143 | -0.551516358 | 0.22  | 0.372 | 1.31E-138 | lobular | MDH1     |
| TJP1     | 5.77E-143 | 0.594108106  | 0.57  | 0.407 | 1.39E-138 | lobular | TJP1     |
| TPK1     | 6.84E-143 | -0.546156919 | 0.157 | 0.297 | 1.65E-138 | lobular | TPK1     |
| CFLAR    | 1.22E-142 | -0.760128352 | 0.289 | 0.43  | 2.95E-138 | lobular | CFLAR    |
| ITGA2    | 1.44E-141 | -0.787615698 | 0.335 | 0.483 | 3.48E-137 | lobular | ITGA2    |
| UGDH     | 1.95E-141 | 0.67422724   | 0.295 | 0.144 | 4.71E-137 | lobular | UGDH     |
| SHROOM3  | 4.02E-141 | 0.455570914  | 0.693 | 0.531 | 9.68E-137 | lobular | SHROOM3  |
| AIMP1    | 4.83E-140 | -0.579739894 | 0.247 | 0.397 | 1.16E-135 | lobular | AIMP1    |
| ERBB2IP  | 2.34E-139 | 0.638782125  | 0.49  | 0.329 | 5.64E-135 | lobular | ERBB2IP  |
| TCF12    | 6.08E-139 | 0.464128449  | 0.656 | 0.493 | 1.47E-134 | lobular | TCF12    |
| RPS24    | 4.56E-138 | -0.264749132 | 0.958 | 0.98  | 1.10E-133 | lobular | RPS24    |
| ZNF644   | 3.58E-137 | 0.620950011  | 0.533 | 0.371 | 8.62E-133 | lobular | ZNF644   |
| JUP      | 7.12E-137 | 0.505519355  | 0.325 | 0.17  | 1.72E-132 | lobular | JUP      |
| PAWR     | 1.70E-136 | 0.552275913  | 0.611 | 0.45  | 4.10E-132 | lobular | PAWR     |
| SARNP    | 4.17E-136 | -0.521306309 | 0.149 | 0.285 | 1.00E-131 | lobular | SARNP    |

|            |           |              |       |       |           |         |             |
|------------|-----------|--------------|-------|-------|-----------|---------|-------------|
| NR6A1      | 6.70E-136 | 0.722521824  | 0.413 | 0.253 | 1.61E-131 | lobular | NR6A1       |
| SVIL       | 3.67E-135 | -0.555515178 | 0.536 | 0.669 | 8.85E-131 | lobular | SVIL        |
| HIPK2      | 5.11E-135 | 0.507886587  | 0.436 | 0.273 | 1.23E-130 | lobular | HIPK2       |
| RPL36AL    | 6.20E-135 | -0.339714751 | 0.869 | 0.917 | 1.50E-130 | lobular | RPL36AL     |
| INPP4B     | 1.12E-134 | 0.574756628  | 0.395 | 0.224 | 2.69E-130 | lobular | INPP4B      |
| ZBTB10     | 4.89E-134 | 0.563426585  | 0.315 | 0.164 | 1.18E-129 | lobular | ZBTB10      |
| USMG5      | 2.45E-133 | -0.388347795 | 0.577 | 0.718 | 5.91E-129 | lobular | USMG5       |
| SYTL2      | 4.96E-133 | 0.494628622  | 0.523 | 0.337 | 1.20E-128 | lobular | SYTL2       |
| TULP4      | 5.88E-133 | 0.496578411  | 0.564 | 0.399 | 1.42E-128 | lobular | TULP4       |
| GADD45A    | 2.88E-132 | 0.591891956  | 0.325 | 0.173 | 6.95E-128 | lobular | GADD45A     |
| TM4SF1     | 3.02E-132 | -0.820894879 | 0.901 | 0.917 | 7.27E-128 | lobular | TM4SF1      |
| DRAM1      | 1.10E-131 | 0.573174817  | 0.356 | 0.201 | 2.65E-127 | lobular | DRAM1       |
| MT-CYB     | 2.91E-131 | 0.250290392  | 0.993 | 0.988 | 7.02E-127 | lobular | MT-CYB      |
| TBL1XR1    | 1.27E-130 | 0.63412192   | 0.633 | 0.499 | 3.07E-126 | lobular | TBL1XR1     |
| LARP1B     | 6.62E-129 | 0.596218661  | 0.271 | 0.132 | 1.60E-124 | lobular | LARP1B      |
| DYNLL1     | 3.97E-128 | 0.51672953   | 0.301 | 0.154 | 9.57E-124 | lobular | DYNLL1      |
| MYL6       | 6.18E-128 | -0.43021124  | 0.925 | 0.95  | 1.49E-123 | lobular | MYL6        |
| BCAR3      | 1.29E-126 | 0.670881335  | 0.335 | 0.191 | 3.11E-122 | lobular | BCAR3       |
| SERPINA3   | 3.28E-126 | -0.719029256 | 0.216 | 0.35  | 7.90E-122 | lobular | SERPINA3    |
| BRK1       | 5.18E-126 | -0.43935     | 0.563 | 0.683 | 1.25E-121 | lobular | BRK1        |
| ATP5G2     | 8.93E-126 | 0.551158505  | 0.767 | 0.691 | 2.15E-121 | lobular | ATP5G2      |
| MBNL2      | 1.59E-125 | 0.492649112  | 0.603 | 0.446 | 3.84E-121 | lobular | MBNL2       |
| RPL13      | 2.89E-125 | 0.47869586   | 0.482 | 0.316 | 6.97E-121 | lobular | RPL13       |
| TOM1L2     | 3.21E-125 | 0.552212901  | 0.358 | 0.209 | 7.74E-121 | lobular | TOM1L2      |
| RERE       | 4.49E-125 | 0.481728123  | 0.628 | 0.478 | 1.08E-120 | lobular | RERE        |
| DDX24      | 1.23E-123 | -0.530661633 | 0.46  | 0.586 | 2.96E-119 | lobular | DDX24       |
| FRMD4A     | 1.68E-123 | -0.691605137 | 0.226 | 0.365 | 4.05E-119 | lobular | FRMD4A      |
| RPL13A     | 3.21E-123 | 0.341798005  | 0.546 | 0.369 | 7.74E-119 | lobular | RPL13A      |
| RPL36      | 8.14E-123 | 0.43168049   | 0.254 | 0.112 | 1.96E-118 | lobular | RPL36       |
| ELF3       | 1.76E-122 | 0.452200548  | 0.574 | 0.415 | 4.25E-118 | lobular | ELF3        |
| WTAP       | 1.93E-121 | -0.766635443 | 0.469 | 0.592 | 4.64E-117 | lobular | WTAP        |
| TNFAIP8    | 7.17E-120 | -0.624425884 | 0.334 | 0.476 | 1.73E-115 | lobular | TNFAIP8     |
| DLGAP1     | 2.04E-118 | 0.65102927   | 0.255 | 0.123 | 4.92E-114 | lobular | DLGAP1      |
| CCNI       | 2.97E-118 | 0.376346244  | 0.684 | 0.536 | 7.15E-114 | lobular | CCNI        |
| NEDD9      | 5.73E-118 | 0.476799396  | 0.433 | 0.274 | 1.38E-113 | lobular | NEDD9       |
| GOLM1      | 3.39E-117 | 0.515295912  | 0.287 | 0.15  | 8.17E-113 | lobular | GOLM1       |
| CCL28      | 5.25E-116 | -0.535635641 | 0.308 | 0.464 | 1.27E-111 | lobular | CCL28       |
| C8orf37-AS | 7.76E-116 | -0.455944106 | 0.196 | 0.332 | 1.87E-111 | lobular | C8orf37-AS1 |
| NUB1       | 1.54E-115 | -0.669692942 | 0.148 | 0.269 | 3.71E-111 | lobular | NUB1        |
| PCBP2      | 2.40E-115 | 0.396421323  | 0.628 | 0.478 | 5.79E-111 | lobular | PCBP2       |
| FUT8       | 2.82E-115 | 0.614195043  | 0.314 | 0.175 | 6.80E-111 | lobular | FUT8        |
| IGF2BP2    | 4.09E-115 | -0.678612181 | 0.223 | 0.355 | 9.87E-111 | lobular | IGF2BP2     |
| UQCR10     | 1.14E-114 | 0.486704002  | 0.564 | 0.417 | 2.76E-110 | lobular | UQCR10      |
| BCL2       | 1.20E-114 | 0.752650286  | 0.326 | 0.189 | 2.90E-110 | lobular | BCL2        |
| APLP2      | 2.11E-114 | 0.488435287  | 0.332 | 0.192 | 5.08E-110 | lobular | APLP2       |
| 7-Sep      | 3.16E-114 | -0.479972235 | 0.324 | 0.461 | 7.62E-110 | lobular | 7-Sep       |
| OPHN1      | 5.42E-114 | 0.615259305  | 0.385 | 0.238 | 1.31E-109 | lobular | OPHN1       |

|           |           |              |       |       |           |         |           |
|-----------|-----------|--------------|-------|-------|-----------|---------|-----------|
| PAN3      | 7.51E-114 | 0.448872024  | 0.691 | 0.552 | 1.81E-109 | lobular | PAN3      |
| CHCHD3    | 2.19E-113 | 0.424683539  | 0.855 | 0.807 | 5.28E-109 | lobular | CHCHD3    |
| TCEANC2   | 2.38E-113 | -0.474153791 | 0.191 | 0.324 | 5.75E-109 | lobular | TCEANC2   |
| RAPH1     | 6.09E-113 | 0.588253214  | 0.391 | 0.25  | 1.47E-108 | lobular | RAPH1     |
| ARHGEF12  | 1.14E-112 | 0.409701619  | 0.637 | 0.481 | 2.76E-108 | lobular | ARHGEF12  |
| THRB      | 2.48E-111 | 0.632787913  | 0.513 | 0.377 | 5.99E-107 | lobular | THRB      |
| COX7A2    | 3.31E-111 | -0.359896281 | 0.736 | 0.81  | 7.98E-107 | lobular | COX7A2    |
| PDCD10    | 6.96E-111 | -0.485007289 | 0.205 | 0.334 | 1.68E-106 | lobular | PDCD10    |
| PCBP1     | 2.69E-110 | 0.405904835  | 0.563 | 0.411 | 6.48E-106 | lobular | PCBP1     |
| MT-ND3    | 5.06E-110 | 0.363454835  | 0.993 | 0.978 | 1.22E-105 | lobular | MT-ND3    |
| TMEM258   | 1.28E-109 | -0.388372324 | 0.56  | 0.667 | 3.09E-105 | lobular | TMEM258   |
| CCT5      | 2.48E-109 | -0.545364241 | 0.249 | 0.377 | 5.98E-105 | lobular | CCT5      |
| EIF3E     | 5.84E-109 | -0.336318686 | 0.517 | 0.675 | 1.41E-104 | lobular | EIF3E     |
| DAD1      | 2.53E-108 | -0.438874664 | 0.452 | 0.574 | 6.10E-104 | lobular | DAD1      |
| NFKBIZ    | 3.46E-108 | -0.567429197 | 0.521 | 0.626 | 8.35E-104 | lobular | NFKBIZ    |
| CLDN1     | 8.19E-108 | -0.86016884  | 0.184 | 0.304 | 1.98E-103 | lobular | CLDN1     |
| RORA      | 4.86E-107 | 0.629302975  | 0.622 | 0.494 | 1.17E-102 | lobular | RORA      |
| ILF2      | 5.15E-107 | -0.516245772 | 0.383 | 0.512 | 1.24E-102 | lobular | ILF2      |
| NEDD4L    | 5.29E-107 | 0.534585889  | 0.651 | 0.514 | 1.27E-102 | lobular | NEDD4L    |
| PSMC2     | 4.61E-106 | -0.408126065 | 0.173 | 0.299 | 1.11E-101 | lobular | PSMC2     |
| MAGI3     | 5.35E-106 | 0.494083714  | 0.439 | 0.294 | 1.29E-101 | lobular | MAGI3     |
| VPS29     | 1.19E-105 | -0.479581926 | 0.273 | 0.403 | 2.86E-101 | lobular | VPS29     |
| WFDC2     | 8.07E-104 | -1.256736964 | 0.277 | 0.407 | 1.95E-99  | lobular | WFDC2     |
| IK        | 1.37E-102 | -0.403866628 | 0.143 | 0.261 | 3.31E-98  | lobular | IK        |
| UBB       | 6.19E-102 | -0.313924224 | 0.685 | 0.784 | 1.49E-97  | lobular | UBB       |
| RPL29     | 2.18E-101 | 0.450430826  | 0.288 | 0.152 | 5.26E-97  | lobular | RPL29     |
| KTN1      | 6.26E-101 | 0.45900334   | 0.593 | 0.461 | 1.51E-96  | lobular | KTN1      |
| RARRES3   | 2.16E-100 | -0.551553656 | 0.176 | 0.294 | 5.22E-96  | lobular | RARRES3   |
| KIAA1522  | 2.52E-100 | 0.404204919  | 0.279 | 0.15  | 6.08E-96  | lobular | KIAA1522  |
| TAOK3     | 6.55E-100 | 0.453811172  | 0.527 | 0.389 | 1.58E-95  | lobular | TAOK3     |
| GSPT1     | 8.14E-100 | 0.471803867  | 0.421 | 0.286 | 1.96E-95  | lobular | GSPT1     |
| TANK      | 1.43E-99  | -0.469647042 | 0.429 | 0.552 | 3.45E-95  | lobular | TANK      |
| HIST1H2AC | 2.27E-99  | 0.404669815  | 0.422 | 0.274 | 5.47E-95  | lobular | HIST1H2AC |
| RANBP9    | 2.45E-99  | 0.445225884  | 0.35  | 0.217 | 5.91E-95  | lobular | RANBP9    |
| BCL6      | 2.47E-99  | 0.475456504  | 0.412 | 0.272 | 5.96E-95  | lobular | BCL6      |
| GBP2      | 7.89E-99  | -0.521539881 | 0.578 | 0.679 | 1.90E-94  | lobular | GBP2      |
| DEFB1     | 3.33E-98  | -0.324502309 | 0.382 | 0.538 | 8.03E-94  | lobular | DEFB1     |
| MYH9      | 3.38E-98  | 0.429572375  | 0.571 | 0.425 | 8.16E-94  | lobular | MYH9      |
| FLNB      | 4.39E-98  | 0.441549362  | 0.515 | 0.365 | 1.06E-93  | lobular | FLNB      |
| EGFR      | 1.29E-97  | -0.501522331 | 0.138 | 0.25  | 3.12E-93  | lobular | EGFR      |
| PRLR      | 1.56E-97  | 0.50541528   | 0.285 | 0.16  | 3.75E-93  | lobular | PRLR      |
| DGKH      | 6.04E-97  | 0.535177422  | 0.359 | 0.228 | 1.46E-92  | lobular | DGKH      |
| OOEP      | 1.05E-96  | -0.26003172  | 0.958 | 0.978 | 2.53E-92  | lobular | OOEP      |
| C4orf3    | 1.21E-96  | -0.422379174 | 0.493 | 0.61  | 2.91E-92  | lobular | C4orf3    |
| SLIRP     | 2.50E-96  | -0.386596175 | 0.261 | 0.394 | 6.03E-92  | lobular | SLIRP     |
| COL4A5    | 5.63E-96  | 0.476551275  | 0.267 | 0.145 | 1.36E-91  | lobular | COL4A5    |
| KCTD9     | 5.71E-96  | -0.569250056 | 0.192 | 0.306 | 1.38E-91  | lobular | KCTD9     |



|          |          |              |       |       |          |         |           |
|----------|----------|--------------|-------|-------|----------|---------|-----------|
| SSBP1    | 7.12E-96 | -0.491813825 | 0.317 | 0.436 | 1.72E-91 | lobular | SSBP1     |
| UBL5     | 1.12E-95 | 0.527060584  | 0.554 | 0.439 | 2.71E-91 | lobular | UBL5      |
| LRBA     | 1.72E-95 | 0.419550399  | 0.689 | 0.559 | 4.15E-91 | lobular | LRBA      |
| PKP4     | 2.02E-95 | 0.447764536  | 0.555 | 0.419 | 4.87E-91 | lobular | PKP4      |
| FARP1    | 2.55E-95 | 0.44578121   | 0.434 | 0.294 | 6.16E-91 | lobular | FARP1     |
| AGR2     | 2.57E-95 | 0.30205311   | 0.296 | 0.161 | 6.20E-91 | lobular | AGR2      |
| CDCP1    | 3.00E-95 | -0.480003646 | 0.234 | 0.355 | 7.24E-91 | lobular | CDCP1     |
| SSBP2    | 1.39E-94 | 0.548998443  | 0.486 | 0.358 | 3.36E-90 | lobular | SSBP2     |
| ENAH     | 1.94E-94 | 0.382229916  | 0.606 | 0.467 | 4.67E-90 | lobular | ENAH      |
| ATP8B1   | 2.53E-94 | 0.563727092  | 0.454 | 0.325 | 6.10E-90 | lobular | ATP8B1    |
| ACTB     | 1.36E-93 | 0.504181829  | 0.691 | 0.566 | 3.29E-89 | lobular | ACTB      |
| NCOA7    | 1.69E-93 | -0.528021603 | 0.392 | 0.523 | 4.07E-89 | lobular | NCOA7     |
| TAX1BP1  | 7.84E-93 | -0.387708739 | 0.591 | 0.683 | 1.89E-88 | lobular | TAX1BP1   |
| KLHL5    | 1.35E-92 | 0.49024559   | 0.333 | 0.21  | 3.26E-88 | lobular | KLHL5     |
| INO80D   | 1.47E-92 | -0.433569653 | 0.525 | 0.643 | 3.55E-88 | lobular | INO80D    |
| INTS6    | 2.42E-92 | 0.482099005  | 0.331 | 0.205 | 5.83E-88 | lobular | INTS6     |
| RBM8A    | 2.64E-92 | -0.451991592 | 0.388 | 0.504 | 6.37E-88 | lobular | RBM8A     |
| UGP2     | 1.13E-91 | -0.445413039 | 0.393 | 0.51  | 2.72E-87 | lobular | UGP2      |
| RASEF    | 1.14E-91 | 0.443556131  | 0.322 | 0.195 | 2.74E-87 | lobular | RASEF     |
| RNF145   | 2.85E-91 | -0.510498639 | 0.293 | 0.416 | 6.88E-87 | lobular | RNF145    |
| ERH      | 1.18E-90 | -0.431215201 | 0.467 | 0.572 | 2.83E-86 | lobular | ERH       |
| MTHFD2L  | 3.89E-90 | -0.686735803 | 0.359 | 0.476 | 9.38E-86 | lobular | MTHFD2L   |
| KAZN     | 7.31E-90 | 0.478279517  | 0.263 | 0.146 | 1.76E-85 | lobular | KAZN      |
| GAB1     | 1.03E-89 | 0.405442753  | 0.437 | 0.302 | 2.48E-85 | lobular | GAB1      |
| CUX1     | 1.40E-89 | 0.453569364  | 0.399 | 0.271 | 3.38E-85 | lobular | CUX1      |
| CD24     | 1.60E-89 | 0.490042078  | 0.628 | 0.502 | 3.87E-85 | lobular | CD24      |
| REEP5    | 3.74E-89 | 0.419704702  | 0.3   | 0.179 | 9.03E-85 | lobular | REEP5     |
| C16orf45 | 1.21E-88 | 0.490665897  | 0.274 | 0.157 | 2.91E-84 | lobular | C16orf45  |
| LDHA     | 1.48E-88 | -0.40430431  | 0.631 | 0.732 | 3.57E-84 | lobular | LDHA      |
| NAALADL2 | 2.03E-88 | 0.519389727  | 0.55  | 0.428 | 4.90E-84 | lobular | NAALADL2  |
| LPP      | 2.62E-88 | 0.283221099  | 0.933 | 0.886 | 6.33E-84 | lobular | LPP       |
| ATP6V0E1 | 4.02E-88 | 0.336563524  | 0.734 | 0.628 | 9.69E-84 | lobular | ATP6V0E1  |
| UBN2     | 9.17E-88 | 0.422434202  | 0.323 | 0.197 | 2.21E-83 | lobular | UBN2      |
| WWC1     | 3.70E-87 | 0.425853786  | 0.47  | 0.337 | 8.91E-83 | lobular | WWC1      |
| GNB1     | 5.04E-87 | 0.376568774  | 0.395 | 0.266 | 1.22E-82 | lobular | GNB1      |
| RPLP2    | 9.97E-87 | 0.272581828  | 0.273 | 0.149 | 2.40E-82 | lobular | RPLP2     |
| RPS16    | 1.19E-86 | 0.269740605  | 0.361 | 0.225 | 2.87E-82 | lobular | RPS16     |
| OSBPL3   | 1.76E-86 | 0.430694264  | 0.277 | 0.159 | 4.25E-82 | lobular | OSBPL3    |
| DDX18    | 2.43E-86 | -0.452548244 | 0.247 | 0.362 | 5.86E-82 | lobular | DDX18     |
| BTRC     | 2.85E-86 | 0.418013619  | 0.311 | 0.188 | 6.87E-82 | lobular | BTRC      |
| DCTN6    | 6.92E-86 | -0.410005218 | 0.236 | 0.353 | 1.67E-81 | lobular | DCTN6     |
| MTRNR2L1 | 1.45E-85 | -0.445570476 | 0.182 | 0.296 | 3.49E-81 | lobular | MTRNR2L12 |
| ATP6V1D  | 5.48E-85 | -0.447507412 | 0.234 | 0.348 | 1.32E-80 | lobular | ATP6V1D   |
| NOS1AP   | 7.35E-85 | 0.392018069  | 0.262 | 0.146 | 1.77E-80 | lobular | NOS1AP    |
| ARIH1    | 7.94E-85 | 0.358342719  | 0.558 | 0.428 | 1.91E-80 | lobular | ARIH1     |
| CADPS2   | 2.76E-84 | 0.812529508  | 0.45  | 0.33  | 6.65E-80 | lobular | CADPS2    |
| ACSL3    | 5.42E-84 | 0.502507057  | 0.385 | 0.259 | 1.31E-79 | lobular | ACSL3     |

|                   |          |              |       |       |          |         |               |
|-------------------|----------|--------------|-------|-------|----------|---------|---------------|
| DLG5              | 1.56E-83 | 0.507795065  | 0.308 | 0.191 | 3.77E-79 | lobular | DLG5          |
| PSMB5             | 1.88E-83 | 0.342252129  | 0.286 | 0.168 | 4.53E-79 | lobular | PSMB5         |
| DNAJB6            | 2.07E-83 | 0.410855487  | 0.432 | 0.304 | 5.00E-79 | lobular | DNAJB6        |
| ARF4              | 3.74E-83 | -0.381664297 | 0.587 | 0.675 | 9.03E-79 | lobular | ARF4          |
| CDH1              | 6.26E-83 | 0.381034973  | 0.651 | 0.533 | 1.51E-78 | lobular | CDH1          |
| STOM              | 1.00E-82 | 0.483360414  | 0.307 | 0.191 | 2.42E-78 | lobular | STOM          |
| CDK13             | 1.37E-82 | 0.469812038  | 0.472 | 0.348 | 3.31E-78 | lobular | CDK13         |
| ESD               | 1.40E-82 | -0.409925162 | 0.271 | 0.39  | 3.37E-78 | lobular | ESD           |
| EIF3H             | 2.27E-82 | 0.356386075  | 0.662 | 0.566 | 5.47E-78 | lobular | EIF3H         |
| PROM1             | 4.06E-82 | -0.482184222 | 0.187 | 0.298 | 9.79E-78 | lobular | PROM1         |
| FNBP1             | 9.27E-82 | 0.358976005  | 0.579 | 0.443 | 2.24E-77 | lobular | FNBP1         |
| ZNF292            | 1.22E-81 | -0.380201177 | 0.526 | 0.631 | 2.94E-77 | lobular | ZNF292        |
| MAP4              | 1.45E-81 | 0.382585727  | 0.53  | 0.402 | 3.51E-77 | lobular | MAP4          |
| MSI2              | 1.88E-81 | 0.421525241  | 0.391 | 0.268 | 4.54E-77 | lobular | MSI2          |
| BARX2             | 3.33E-81 | -0.576248021 | 0.212 | 0.318 | 8.03E-77 | lobular | BARX2         |
| SLC38A2           | 4.41E-81 | 0.448864111  | 0.432 | 0.302 | 1.06E-76 | lobular | SLC38A2       |
| SLC4A7            | 4.57E-81 | -0.460169691 | 0.239 | 0.353 | 1.10E-76 | lobular | SLC4A7        |
| FEZ2              | 5.04E-81 | -0.524341362 | 0.301 | 0.409 | 1.22E-76 | lobular | FEZ2          |
| HERC4             | 6.71E-81 | 0.4540561    | 0.574 | 0.454 | 1.62E-76 | lobular | HERC4         |
| GSK3B             | 8.18E-81 | 0.404604487  | 0.448 | 0.322 | 1.97E-76 | lobular | GSK3B         |
| SLCO3A1           | 1.91E-80 | -0.456573255 | 0.148 | 0.25  | 4.60E-76 | lobular | SLCO3A1       |
| SPRED2            | 6.08E-80 | 0.403690653  | 0.255 | 0.145 | 1.47E-75 | lobular | SPRED2        |
| RUFY3             | 6.68E-80 | 0.359411244  | 0.284 | 0.168 | 1.61E-75 | lobular | RUFY3         |
| ZCCHC17           | 7.01E-80 | -0.442164769 | 0.219 | 0.327 | 1.69E-75 | lobular | ZCCHC17       |
| ZFAND3            | 1.14E-79 | 0.379621661  | 0.79  | 0.714 | 2.76E-75 | lobular | ZFAND3        |
| C1QTNF3- <i>A</i> | 3.19E-79 | 0.470015208  | 0.366 | 0.244 | 7.70E-75 | lobular | C1QTNF3-AMACR |
| EIF2S1            | 3.21E-79 | -0.410920679 | 0.162 | 0.264 | 7.74E-75 | lobular | EIF2S1        |
| UBE2V2            | 7.87E-79 | -0.396879293 | 0.211 | 0.319 | 1.90E-74 | lobular | UBE2V2        |
| AC072062.1        | 1.10E-78 | 0.377281525  | 0.523 | 0.391 | 2.66E-74 | lobular | AC072062.1    |
| PPP6R3            | 2.58E-78 | 0.37005294   | 0.555 | 0.434 | 6.22E-74 | lobular | PPP6R3        |
| MKL1              | 6.95E-78 | 0.355053666  | 0.546 | 0.417 | 1.68E-73 | lobular | MKL1          |
| DYNLT1            | 8.66E-78 | -0.42050235  | 0.567 | 0.644 | 2.09E-73 | lobular | DYNLT1        |
| DLEU2             | 1.56E-77 | 0.402673056  | 0.264 | 0.155 | 3.75E-73 | lobular | DLEU2         |
| SRSF3             | 3.37E-77 | -0.565243137 | 0.396 | 0.496 | 8.13E-73 | lobular | SRSF3         |
| TTL5              | 4.53E-77 | 0.43249548   | 0.328 | 0.212 | 1.09E-72 | lobular | TTL5          |
| TSC22D2           | 5.79E-77 | 0.356861176  | 0.518 | 0.386 | 1.40E-72 | lobular | TSC22D2       |
| SH3BGRL           | 4.25E-76 | 0.447215606  | 0.448 | 0.329 | 1.02E-71 | lobular | SH3BGRL       |
| FOXP1             | 6.62E-76 | 0.424250935  | 0.673 | 0.574 | 1.60E-71 | lobular | FOXP1         |
| CTNND1            | 9.54E-76 | 0.345144908  | 0.444 | 0.319 | 2.30E-71 | lobular | CTNND1        |
| MAST4             | 1.00E-75 | 0.434557449  | 0.575 | 0.454 | 2.42E-71 | lobular | MAST4         |
| RBM47             | 1.29E-75 | 0.349722532  | 0.681 | 0.566 | 3.11E-71 | lobular | RBM47         |
| TBL1X             | 2.32E-75 | 0.340851443  | 0.259 | 0.149 | 5.60E-71 | lobular | TBL1X         |
| SUSD6             | 3.32E-75 | 0.386732495  | 0.324 | 0.208 | 8.01E-71 | lobular | SUSD6         |
| RP1-292B1         | 6.50E-75 | 0.301038952  | 0.257 | 0.146 | 1.57E-70 | lobular | RP1-292B18.4  |
| YTHDC1            | 8.49E-75 | 0.37700193   | 0.432 | 0.309 | 2.05E-70 | lobular | YTHDC1        |
| ANKRD11           | 9.31E-75 | 0.33368852   | 0.368 | 0.246 | 2.24E-70 | lobular | ANKRD11       |
| EIF4A1            | 1.36E-73 | -0.428739541 | 0.364 | 0.472 | 3.27E-69 | lobular | EIF4A1        |

|             |          |              |       |       |          |         |              |
|-------------|----------|--------------|-------|-------|----------|---------|--------------|
| NHSL2       | 1.57E-73 | -0.378770636 | 0.24  | 0.349 | 3.80E-69 | lobular | NHSL2        |
| COX7B       | 9.38E-73 | -0.336622942 | 0.605 | 0.682 | 2.26E-68 | lobular | COX7B        |
| DUSP10      | 1.28E-72 | 0.400883575  | 0.265 | 0.16  | 3.09E-68 | lobular | DUSP10       |
| PRRG4       | 2.48E-72 | 0.363336491  | 0.308 | 0.195 | 5.99E-68 | lobular | PRRG4        |
| ATP6V1G1    | 2.70E-72 | 0.328154719  | 0.437 | 0.315 | 6.50E-68 | lobular | ATP6V1G1     |
| ADAM32      | 1.00E-71 | 0.424609956  | 0.272 | 0.164 | 2.42E-67 | lobular | ADAM32       |
| EIF3K       | 1.21E-71 | 0.550467978  | 0.367 | 0.274 | 2.92E-67 | lobular | EIF3K        |
| GPBP1       | 3.55E-71 | 0.392882748  | 0.722 | 0.635 | 8.56E-67 | lobular | GPBP1        |
| KAT6B       | 5.29E-71 | 0.37503208   | 0.3   | 0.189 | 1.28E-66 | lobular | KAT6B        |
| CTC-471J1.1 | 7.00E-71 | -0.67169315  | 0.624 | 0.658 | 1.69E-66 | lobular | CTC-471J1.9  |
| ARPC3       | 7.82E-71 | -0.360661854 | 0.64  | 0.7   | 1.89E-66 | lobular | ARPC3        |
| ARFGEF2     | 1.20E-70 | 0.364197836  | 0.419 | 0.299 | 2.90E-66 | lobular | ARFGEF2      |
| OSBPL8      | 2.18E-70 | 0.376032448  | 0.281 | 0.174 | 5.26E-66 | lobular | OSBPL8       |
| KLHL24      | 2.24E-70 | 0.316633558  | 0.398 | 0.276 | 5.39E-66 | lobular | KLHL24       |
| ATF4        | 3.34E-70 | 0.351201588  | 0.442 | 0.323 | 8.05E-66 | lobular | ATF4         |
| CNOT4       | 9.94E-70 | 0.329247608  | 0.447 | 0.325 | 2.40E-65 | lobular | CNOT4        |
| CREBBP      | 2.05E-69 | 0.330113735  | 0.345 | 0.23  | 4.95E-65 | lobular | CREBBP       |
| CDC42BPA    | 3.63E-69 | 0.377587903  | 0.428 | 0.31  | 8.75E-65 | lobular | CDC42BPA     |
| KCMF1       | 4.18E-69 | 0.348701844  | 0.383 | 0.265 | 1.01E-64 | lobular | KCMF1        |
| HNRNPM      | 8.59E-69 | 0.332364696  | 0.305 | 0.195 | 2.07E-64 | lobular | HNRNPM       |
| YAP1        | 1.09E-68 | 0.337252193  | 0.579 | 0.462 | 2.63E-64 | lobular | YAP1         |
| RTCB        | 1.74E-68 | -0.386129845 | 0.371 | 0.474 | 4.20E-64 | lobular | RTCB         |
| UFM1        | 2.73E-68 | -0.384581761 | 0.287 | 0.391 | 6.59E-64 | lobular | UFM1         |
| ITGB8       | 3.82E-68 | -0.440922639 | 0.461 | 0.559 | 9.20E-64 | lobular | ITGB8        |
| ZFAS1       | 4.18E-68 | -0.267848021 | 0.915 | 0.951 | 1.01E-63 | lobular | ZFAS1        |
| SMARCC1     | 6.15E-68 | 0.335814414  | 0.334 | 0.222 | 1.48E-63 | lobular | SMARCC1      |
| RP5-857K2   | 6.73E-68 | 0.328233908  | 0.481 | 0.359 | 1.62E-63 | lobular | RP5-857K21.4 |
| RPL41       | 8.17E-68 | -0.679637482 | 0.882 | 0.938 | 1.97E-63 | lobular | RPL41        |
| BACE2       | 1.25E-67 | -0.43387141  | 0.275 | 0.377 | 3.03E-63 | lobular | BACE2        |
| CFL1        | 1.42E-67 | 0.411913007  | 0.359 | 0.251 | 3.42E-63 | lobular | CFL1         |
| EEF2        | 3.38E-67 | 0.41170816   | 0.458 | 0.333 | 8.15E-63 | lobular | EEF2         |
| POLR1D      | 3.41E-67 | 0.319631971  | 0.265 | 0.163 | 8.22E-63 | lobular | POLR1D       |
| TOP1        | 6.79E-67 | 0.333556748  | 0.491 | 0.375 | 1.64E-62 | lobular | TOP1         |
| DPM1        | 7.65E-67 | -0.36594229  | 0.207 | 0.307 | 1.84E-62 | lobular | DPM1         |
| TIAM1       | 9.15E-67 | -0.549401867 | 0.207 | 0.304 | 2.21E-62 | lobular | TIAM1        |
| CD63        | 1.28E-66 | 0.394953942  | 0.425 | 0.315 | 3.08E-62 | lobular | CD63         |
| UBE2G1      | 1.31E-66 | 0.326361973  | 0.299 | 0.191 | 3.17E-62 | lobular | UBE2G1       |
| BRD2        | 1.94E-66 | 0.338173464  | 0.311 | 0.204 | 4.69E-62 | lobular | BRD2         |
| SDC4        | 2.14E-66 | -0.612065958 | 0.295 | 0.388 | 5.15E-62 | lobular | SDC4         |
| UBR5        | 2.45E-66 | 0.322630938  | 0.516 | 0.398 | 5.92E-62 | lobular | UBR5         |
| OTUD7B      | 2.59E-66 | 0.360230716  | 0.338 | 0.227 | 6.24E-62 | lobular | OTUD7B       |
| FGD6        | 2.72E-66 | 0.371667258  | 0.388 | 0.276 | 6.55E-62 | lobular | FGD6         |
| GBE1        | 2.78E-66 | -0.512521194 | 0.322 | 0.424 | 6.69E-62 | lobular | GBE1         |
| COX6C       | 3.26E-66 | 0.689053859  | 0.769 | 0.754 | 7.87E-62 | lobular | COX6C        |
| USP47       | 3.64E-66 | 0.366079634  | 0.466 | 0.35  | 8.78E-62 | lobular | USP47        |
| WNK1        | 4.52E-66 | 0.31773578   | 0.282 | 0.178 | 1.09E-61 | lobular | WNK1         |
| SNRPD1      | 5.07E-66 | -0.396256697 | 0.249 | 0.35  | 1.22E-61 | lobular | SNRPD1       |

|          |          |              |       |       |          |         |          |
|----------|----------|--------------|-------|-------|----------|---------|----------|
| EIF3L    | 5.16E-66 | -0.27701116  | 0.547 | 0.662 | 1.25E-61 | lobular | EIF3L    |
| KIF13A   | 6.49E-66 | 0.437381135  | 0.44  | 0.326 | 1.56E-61 | lobular | KIF13A   |
| CNKS3    | 7.26E-66 | -0.693051529 | 0.274 | 0.366 | 1.75E-61 | lobular | CNKS3    |
| TMEM150C | 2.56E-65 | -0.357798725 | 0.173 | 0.265 | 6.17E-61 | lobular | TMEM150C |
| CCT2     | 9.07E-65 | -0.391327021 | 0.267 | 0.366 | 2.19E-60 | lobular | CCT2     |
| SLC38A1  | 1.28E-64 | 0.348888963  | 0.437 | 0.325 | 3.10E-60 | lobular | SLC38A1  |
| PRDX3    | 1.71E-64 | 0.345133623  | 0.264 | 0.164 | 4.12E-60 | lobular | PRDX3    |
| RPL7     | 3.97E-64 | 0.345036864  | 0.835 | 0.946 | 9.57E-60 | lobular | RPL7     |
| PDZD8    | 5.26E-64 | 0.382455811  | 0.27  | 0.171 | 1.27E-59 | lobular | PDZD8    |
| S100A6   | 1.22E-63 | 0.828898269  | 0.601 | 0.532 | 2.93E-59 | lobular | S100A6   |
| SSR2     | 1.59E-63 | -0.285113826 | 0.658 | 0.733 | 3.84E-59 | lobular | SSR2     |
| VAV3     | 3.74E-63 | 0.390812032  | 0.327 | 0.222 | 9.03E-59 | lobular | VAV3     |
| 15-Sep   | 3.81E-63 | -0.370064982 | 0.38  | 0.473 | 9.19E-59 | lobular | 15-Sep   |
| RBX1     | 4.11E-63 | -0.365587557 | 0.406 | 0.497 | 9.92E-59 | lobular | RBX1     |
| SARAF    | 1.10E-62 | 0.291143604  | 0.398 | 0.282 | 2.64E-58 | lobular | SARAF    |
| ZSWIM6   | 1.24E-62 | 0.367812514  | 0.54  | 0.432 | 2.98E-58 | lobular | ZSWIM6   |
| ASH1L    | 1.94E-62 | 0.3261521    | 0.593 | 0.484 | 4.67E-58 | lobular | ASH1L    |
| EIF1     | 7.46E-62 | 0.296656839  | 0.526 | 0.408 | 1.80E-57 | lobular | EIF1     |
| C8orf59  | 1.37E-61 | -0.336580474 | 0.25  | 0.35  | 3.31E-57 | lobular | C8orf59  |
| IGF1R    | 1.75E-61 | 0.316766544  | 0.548 | 0.433 | 4.22E-57 | lobular | IGF1R    |
| KYNU     | 2.49E-61 | -0.772374108 | 0.208 | 0.301 | 6.01E-57 | lobular | KYNU     |
| HNRNPH2  | 2.50E-61 | -0.332533779 | 0.191 | 0.286 | 6.04E-57 | lobular | HNRNPH2  |
| SLC12A2  | 2.58E-61 | -0.590868554 | 0.377 | 0.466 | 6.23E-57 | lobular | SLC12A2  |
| SEMA6A   | 2.60E-61 | -0.570973372 | 0.19  | 0.28  | 6.27E-57 | lobular | SEMA6A   |
| ZRANB2   | 2.91E-61 | -0.359761058 | 0.198 | 0.291 | 7.02E-57 | lobular | ZRANB2   |
| ELF2     | 3.10E-61 | 0.353852976  | 0.431 | 0.322 | 7.48E-57 | lobular | ELF2     |
| EP300    | 3.18E-61 | 0.321342561  | 0.258 | 0.161 | 7.68E-57 | lobular | EP300    |
| PAM      | 5.20E-61 | -0.376534008 | 0.433 | 0.527 | 1.25E-56 | lobular | PAM      |
| AHNAK    | 1.30E-60 | 0.333898468  | 0.399 | 0.29  | 3.14E-56 | lobular | AHNAK    |
| RUNX1    | 1.34E-60 | 0.282112912  | 0.685 | 0.579 | 3.23E-56 | lobular | RUNX1    |
| DNAJC8   | 2.44E-60 | -0.337943968 | 0.186 | 0.28  | 5.89E-56 | lobular | DNAJC8   |
| SRPK1    | 2.94E-60 | -0.407612754 | 0.455 | 0.542 | 7.09E-56 | lobular | SRPK1    |
| CD164    | 4.37E-60 | 0.340335703  | 0.322 | 0.221 | 1.05E-55 | lobular | CD164    |
| USP53    | 4.83E-60 | -0.61077     | 0.603 | 0.661 | 1.16E-55 | lobular | USP53    |
| LRRFIP1  | 6.86E-60 | 0.254577817  | 0.675 | 0.559 | 1.65E-55 | lobular | LRRFIP1  |
| CRY1     | 8.29E-60 | 0.384597211  | 0.428 | 0.319 | 2.00E-55 | lobular | CRY1     |
| RBBP6    | 1.51E-59 | 0.307506286  | 0.322 | 0.217 | 3.63E-55 | lobular | RBBP6    |
| UBE2K    | 1.55E-59 | 0.315285432  | 0.424 | 0.312 | 3.73E-55 | lobular | UBE2K    |
| FBXO32   | 2.09E-59 | -0.57727673  | 0.336 | 0.428 | 5.04E-55 | lobular | FBXO32   |
| ZFAND5   | 2.28E-59 | 0.318694219  | 0.477 | 0.367 | 5.50E-55 | lobular | ZFAND5   |
| PERP     | 2.57E-59 | 0.288542672  | 0.498 | 0.385 | 6.19E-55 | lobular | PERP     |
| RARS     | 2.58E-59 | -0.339006279 | 0.189 | 0.28  | 6.23E-55 | lobular | RARS     |
| C2orf88  | 3.29E-59 | -0.396925484 | 0.315 | 0.41  | 7.93E-55 | lobular | C2orf88  |
| BCAS3    | 3.95E-59 | -0.264959421 | 0.716 | 0.777 | 9.52E-55 | lobular | BCAS3    |
| SLTM     | 5.57E-59 | 0.303155991  | 0.335 | 0.231 | 1.34E-54 | lobular | SLTM     |
| HSPH1    | 7.38E-59 | 0.426455969  | 0.324 | 0.223 | 1.78E-54 | lobular | HSPH1    |
| SREBF2   | 7.91E-59 | 0.31370641   | 0.421 | 0.309 | 1.91E-54 | lobular | SREBF2   |

|           |          |              |       |       |                  |            |
|-----------|----------|--------------|-------|-------|------------------|------------|
| SNRPG     | 9.45E-59 | -0.358911885 | 0.49  | 0.568 | 2.28E-54 lobular | SNRPG      |
| TGIF1     | 1.03E-58 | 0.342257951  | 0.256 | 0.163 | 2.48E-54 lobular | TGIF1      |
| ATP5E     | 1.49E-58 | 0.457504292  | 0.59  | 0.502 | 3.59E-54 lobular | ATP5E      |
| RNMT      | 1.84E-58 | -0.359417608 | 0.293 | 0.393 | 4.43E-54 lobular | RNMT       |
| PTPRE     | 3.71E-58 | 0.464966454  | 0.302 | 0.208 | 8.95E-54 lobular | PTPRE      |
| PPP2CB    | 3.77E-58 | 0.294101567  | 0.381 | 0.272 | 9.08E-54 lobular | PPP2CB     |
| LIMCH1    | 3.87E-58 | 0.415757283  | 0.525 | 0.428 | 9.33E-54 lobular | LIMCH1     |
| MYO1B     | 9.41E-58 | 0.405637755  | 0.488 | 0.383 | 2.27E-53 lobular | MYO1B      |
| ATXN2     | 1.15E-57 | 0.302182501  | 0.376 | 0.269 | 2.77E-53 lobular | ATXN2      |
| CD46      | 1.21E-57 | 0.299237454  | 0.446 | 0.333 | 2.92E-53 lobular | CD46       |
| SMCHD1    | 1.67E-57 | 0.375203505  | 0.447 | 0.346 | 4.02E-53 lobular | SMCHD1     |
| MAN1A1    | 2.60E-57 | 0.316360125  | 0.265 | 0.17  | 6.28E-53 lobular | MAN1A1     |
| AC018890. | 2.69E-57 | 0.319757162  | 0.277 | 0.18  | 6.49E-53 lobular | AC018890.6 |
| GRAMD3    | 2.71E-57 | 0.351329783  | 0.389 | 0.282 | 6.54E-53 lobular | GRAMD3     |
| DMD       | 3.97E-57 | -0.4739159   | 0.228 | 0.318 | 9.56E-53 lobular | DMD        |
| CD9       | 4.09E-57 | 0.371834893  | 0.427 | 0.324 | 9.85E-53 lobular | CD9        |
| TMEM87A   | 4.71E-57 | 0.274517159  | 0.428 | 0.317 | 1.14E-52 lobular | TMEM87A    |
| ATP6V1E1  | 7.23E-57 | -0.340171141 | 0.26  | 0.353 | 1.74E-52 lobular | ATP6V1E1   |
| ATF3      | 1.50E-56 | 0.339961322  | 0.449 | 0.34  | 3.62E-52 lobular | ATF3       |
| CTNNA1    | 1.91E-56 | 0.28831696   | 0.578 | 0.475 | 4.59E-52 lobular | CTNNA1     |
| PLCB1     | 2.89E-56 | -0.489759923 | 0.192 | 0.28  | 6.98E-52 lobular | PLCB1      |
| DTNB      | 3.14E-56 | -0.378518831 | 0.392 | 0.489 | 7.58E-52 lobular | DTNB       |
| KLF6      | 3.90E-56 | 0.314009513  | 0.611 | 0.507 | 9.41E-52 lobular | KLF6       |
| SRSF4     | 4.20E-56 | 0.277307052  | 0.334 | 0.232 | 1.01E-51 lobular | SRSF4      |
| RB1CC1    | 6.14E-56 | 0.305585423  | 0.524 | 0.416 | 1.48E-51 lobular | RB1CC1     |
| CSNK1A1   | 7.96E-56 | 0.288447235  | 0.693 | 0.595 | 1.92E-51 lobular | CSNK1A1    |
| RNF11     | 9.05E-56 | 0.290266083  | 0.284 | 0.188 | 2.18E-51 lobular | RNF11      |
| GABARAP   | 1.11E-55 | -0.359018421 | 0.327 | 0.424 | 2.68E-51 lobular | GABARAP    |
| ARHGEF28  | 1.34E-55 | -0.492235725 | 0.241 | 0.332 | 3.24E-51 lobular | ARHGEF28   |
| CCT3      | 1.75E-55 | 0.298709587  | 0.4   | 0.298 | 4.23E-51 lobular | CCT3       |
| SLC22A23  | 1.79E-55 | 0.308593537  | 0.286 | 0.189 | 4.31E-51 lobular | SLC22A23   |
| BAZ1A     | 2.97E-55 | 0.372713575  | 0.424 | 0.322 | 7.17E-51 lobular | BAZ1A      |
| UBE2R2    | 3.19E-55 | 0.285745494  | 0.411 | 0.305 | 7.69E-51 lobular | UBE2R2     |
| EIF3I     | 3.54E-55 | -0.303688986 | 0.567 | 0.643 | 8.53E-51 lobular | EIF3I      |
| PTPRK     | 8.31E-55 | 0.293830099  | 0.794 | 0.735 | 2.00E-50 lobular | PTPRK      |
| CAB39     | 9.01E-55 | 0.343557757  | 0.4   | 0.301 | 2.17E-50 lobular | CAB39      |
| LAMC2     | 1.18E-54 | -0.369437658 | 0.23  | 0.324 | 2.84E-50 lobular | LAMC2      |
| TMBIM6    | 1.23E-54 | -0.328525313 | 0.854 | 0.873 | 2.96E-50 lobular | TMBIM6     |
| RNF144B   | 1.72E-54 | -0.489476468 | 0.256 | 0.343 | 4.14E-50 lobular | RNF144B    |
| RAB21     | 1.92E-54 | 0.31337929   | 0.301 | 0.203 | 4.62E-50 lobular | RAB21      |
| YY1       | 2.15E-54 | 0.274179961  | 0.257 | 0.165 | 5.17E-50 lobular | YY1        |
| POLE2     | 2.50E-54 | -0.314658256 | 0.205 | 0.297 | 6.02E-50 lobular | POLE2      |
| MAP2K4    | 2.60E-54 | -0.363322234 | 0.412 | 0.498 | 6.27E-50 lobular | MAP2K4     |
| GPBP1L1   | 2.72E-54 | 0.292503517  | 0.384 | 0.281 | 6.56E-50 lobular | GPBP1L1    |
| CTTNBP2N1 | 3.27E-54 | -0.346776759 | 0.18  | 0.265 | 7.87E-50 lobular | CTTNBP2NL  |
| SCGB2A2   | 3.32E-54 | 0.506063487  | 0.314 | 0.21  | 8.02E-50 lobular | SCGB2A2    |
| CLIC6     | 4.39E-54 | 0.374053549  | 0.252 | 0.164 | 1.06E-49 lobular | CLIC6      |

|           |          |              |       |       |          |         |                  |
|-----------|----------|--------------|-------|-------|----------|---------|------------------|
| SEMA4B    | 5.32E-54 | 0.272551279  | 0.26  | 0.167 | 1.28E-49 | lobular | SEMA4B           |
| ITPR2     | 6.63E-54 | 0.3540992    | 0.513 | 0.412 | 1.60E-49 | lobular | ITPR2            |
| ANO6      | 9.35E-54 | 0.342447654  | 0.556 | 0.463 | 2.25E-49 | lobular | ANO6             |
| CIR1      | 1.33E-53 | -0.327803467 | 0.224 | 0.314 | 3.20E-49 | lobular | CIR1             |
| NAV2      | 1.74E-53 | -0.44988989  | 0.383 | 0.473 | 4.20E-49 | lobular | NAV2             |
| MAN2A1    | 5.95E-53 | 0.291929364  | 0.359 | 0.258 | 1.44E-48 | lobular | MAN2A1           |
| PDK3      | 7.56E-53 | -0.454648192 | 0.198 | 0.282 | 1.82E-48 | lobular | PDK3             |
| MAP4K4    | 1.02E-52 | -0.429673366 | 0.205 | 0.289 | 2.47E-48 | lobular | MAP4K4           |
| TBC1D3P1- | 1.18E-52 | -0.436448065 | 0.56  | 0.638 | 2.85E-48 | lobular | TBC1D3P1-DHX40P1 |
| PIP5K1A   | 1.31E-52 | 0.294625731  | 0.341 | 0.242 | 3.15E-48 | lobular | PIP5K1A          |
| RALGAPA1  | 1.41E-52 | 0.334701928  | 0.342 | 0.247 | 3.39E-48 | lobular | RALGAPA1         |
| CXCR4     | 2.07E-52 | -0.399549607 | 0.187 | 0.272 | 5.00E-48 | lobular | CXCR4            |
| CTBP2     | 2.76E-52 | 0.264724044  | 0.386 | 0.28  | 6.65E-48 | lobular | CTBP2            |
| RNF10     | 3.35E-52 | 0.283929868  | 0.26  | 0.171 | 8.07E-48 | lobular | RNF10            |
| ZBTB16    | 4.34E-52 | 0.318670367  | 0.314 | 0.216 | 1.05E-47 | lobular | ZBTB16           |
| PTPN14    | 4.44E-52 | -0.462102745 | 0.271 | 0.356 | 1.07E-47 | lobular | PTPN14           |
| YBX3      | 5.27E-52 | 0.281849781  | 0.324 | 0.227 | 1.27E-47 | lobular | YBX3             |
| CREBRF    | 6.71E-52 | 0.272659336  | 0.302 | 0.207 | 1.62E-47 | lobular | CREBRF           |
| AC090498. | 1.29E-51 | -0.33552784  | 0.275 | 0.363 | 3.11E-47 | lobular | AC090498.1       |
| CYCS      | 1.34E-51 | -0.332060535 | 0.493 | 0.569 | 3.23E-47 | lobular | CYCS             |
| ATP5J     | 2.98E-51 | -0.298744467 | 0.47  | 0.551 | 7.19E-47 | lobular | ATP5J            |
| RAB7A     | 3.49E-51 | 0.277165542  | 0.491 | 0.39  | 8.41E-47 | lobular | RAB7A            |
| CHCHD2    | 4.14E-51 | 0.346104827  | 0.291 | 0.201 | 9.97E-47 | lobular | CHCHD2           |
| LAMB3     | 5.67E-51 | -0.4646258   | 0.209 | 0.294 | 1.37E-46 | lobular | LAMB3            |
| SRRM2     | 7.84E-51 | 0.266948921  | 0.251 | 0.163 | 1.89E-46 | lobular | SRRM2            |
| EEF1B2    | 1.92E-50 | 0.641554188  | 0.726 | 0.736 | 4.64E-46 | lobular | EEF1B2           |
| CBLB      | 2.98E-50 | 0.312418465  | 0.359 | 0.262 | 7.19E-46 | lobular | CBLB             |
| RARRES1   | 3.20E-50 | -0.453293524 | 0.181 | 0.266 | 7.72E-46 | lobular | RARRES1          |
| AKAP13    | 4.75E-50 | 0.329719185  | 0.646 | 0.557 | 1.14E-45 | lobular | AKAP13           |
| GNG12     | 5.68E-50 | 0.30933461   | 0.366 | 0.269 | 1.37E-45 | lobular | GNG12            |
| MYO10     | 1.25E-49 | 0.329137703  | 0.289 | 0.199 | 3.01E-45 | lobular | MYO10            |
| UBE2L3    | 2.04E-49 | -0.329044089 | 0.41  | 0.49  | 4.92E-45 | lobular | UBE2L3           |
| ARID1B    | 2.22E-49 | 0.296933387  | 0.535 | 0.432 | 5.35E-45 | lobular | ARID1B           |
| GHITM     | 3.52E-49 | -0.334659664 | 0.416 | 0.494 | 8.49E-45 | lobular | GHITM            |
| MAST2     | 4.59E-49 | 0.324746735  | 0.258 | 0.171 | 1.11E-44 | lobular | MAST2            |
| ASPH      | 6.09E-49 | 0.299175248  | 0.321 | 0.228 | 1.47E-44 | lobular | ASPH             |
| EIF4G3    | 7.88E-49 | 0.314135699  | 0.55  | 0.452 | 1.90E-44 | lobular | EIF4G3           |
| DIAPH1    | 8.09E-49 | 0.276265823  | 0.335 | 0.239 | 1.95E-44 | lobular | DIAPH1           |
| CALR      | 8.48E-49 | 0.304341632  | 0.261 | 0.173 | 2.05E-44 | lobular | CALR             |
| ARID1A    | 9.10E-49 | 0.269520475  | 0.275 | 0.186 | 2.20E-44 | lobular | ARID1A           |
| LCOR      | 1.21E-48 | 0.330287554  | 0.3   | 0.213 | 2.93E-44 | lobular | LCOR             |
| EMP1      | 1.76E-48 | -0.613970935 | 0.675 | 0.709 | 4.25E-44 | lobular | EMP1             |
| ARL1      | 6.13E-48 | -0.303928599 | 0.219 | 0.304 | 1.48E-43 | lobular | ARL1             |
| ATP5H     | 6.19E-48 | -0.278771447 | 0.318 | 0.407 | 1.49E-43 | lobular | ATP5H            |
| HNRNPC    | 6.22E-48 | -0.287189649 | 0.773 | 0.803 | 1.50E-43 | lobular | HNRNPC           |
| CCT8      | 1.57E-47 | -0.343966016 | 0.253 | 0.333 | 3.78E-43 | lobular | CCT8             |
| CLIP1     | 1.69E-47 | 0.307567124  | 0.438 | 0.34  | 4.07E-43 | lobular | CLIP1            |

|           |          |              |       |       |          |         |               |
|-----------|----------|--------------|-------|-------|----------|---------|---------------|
| BCOR      | 1.99E-47 | -0.252453411 | 0.474 | 0.581 | 4.80E-43 | lobular | BCOR          |
| CLINT1    | 2.15E-47 | -0.347825223 | 0.218 | 0.301 | 5.17E-43 | lobular | CLINT1        |
| NFAT5     | 2.28E-47 | 0.301446279  | 0.664 | 0.572 | 5.51E-43 | lobular | NFAT5         |
| OLA1      | 3.77E-47 | 0.312406198  | 0.36  | 0.268 | 9.09E-43 | lobular | OLA1          |
| SIK3      | 4.21E-47 | -0.511055578 | 0.97  | 0.977 | 1.01E-42 | lobular | SIK3          |
| CALCOCO2  | 4.46E-47 | -0.328517216 | 0.222 | 0.304 | 1.07E-42 | lobular | CALCOCO2      |
| TMEM41B   | 6.37E-47 | 0.269266122  | 0.284 | 0.195 | 1.54E-42 | lobular | TMEM41B       |
| CHD2      | 7.47E-47 | 0.262455812  | 0.589 | 0.483 | 1.80E-42 | lobular | CHD2          |
| CYB5A     | 2.13E-46 | 0.356672836  | 0.292 | 0.207 | 5.14E-42 | lobular | CYB5A         |
| ATXN1     | 2.39E-46 | 0.297095111  | 0.554 | 0.455 | 5.76E-42 | lobular | ATXN1         |
| CYR61     | 2.83E-46 | 0.328001609  | 0.308 | 0.211 | 6.82E-42 | lobular | CYR61         |
| CAPN8     | 3.98E-46 | 0.265820394  | 0.253 | 0.166 | 9.60E-42 | lobular | CAPN8         |
| HIST1H2BD | 4.00E-46 | 0.286588045  | 0.337 | 0.243 | 9.64E-42 | lobular | HIST1H2BD     |
| KMT2E     | 4.46E-46 | 0.315545915  | 0.503 | 0.408 | 1.08E-41 | lobular | KMT2E         |
| PFDN4     | 4.87E-46 | -0.294232307 | 0.304 | 0.392 | 1.17E-41 | lobular | PFDN4         |
| NDUFV2    | 8.60E-46 | 0.28590179   | 0.306 | 0.217 | 2.07E-41 | lobular | NDUFV2        |
| THSD4-AS1 | 1.31E-45 | -0.30611415  | 0.43  | 0.508 | 3.15E-41 | lobular | THSD4-AS1     |
| PNPLA8    | 1.40E-45 | -0.362287384 | 0.249 | 0.332 | 3.38E-41 | lobular | PNPLA8        |
| PPM1H     | 3.34E-45 | -0.451313773 | 0.286 | 0.363 | 8.06E-41 | lobular | PPM1H         |
| CWC15     | 3.52E-45 | -0.289046914 | 0.254 | 0.339 | 8.48E-41 | lobular | CWC15         |
| SF3B6     | 4.47E-45 | -0.278539803 | 0.584 | 0.65  | 1.08E-40 | lobular | SF3B6         |
| RP11-511B | 5.62E-45 | -0.287720169 | 0.48  | 0.555 | 1.35E-40 | lobular | RP11-511B23.2 |
| PAPSS1    | 5.65E-45 | -0.385441547 | 0.201 | 0.277 | 1.36E-40 | lobular | PAPSS1        |
| FAM185A   | 1.22E-44 | -0.315805045 | 0.183 | 0.259 | 2.93E-40 | lobular | FAM185A       |
| SMC5      | 1.77E-44 | -0.384267412 | 0.277 | 0.355 | 4.27E-40 | lobular | SMC5          |
| OCLN      | 1.92E-44 | 0.2770575    | 0.374 | 0.28  | 4.63E-40 | lobular | OCLN          |
| OSMR      | 2.18E-44 | -0.336069944 | 0.277 | 0.359 | 5.26E-40 | lobular | OSMR          |
| NCOR1     | 3.80E-44 | 0.2618251    | 0.459 | 0.366 | 9.17E-40 | lobular | NCOR1         |
| LAMTOR5   | 4.05E-44 | -0.270361724 | 0.563 | 0.63  | 9.78E-40 | lobular | LAMTOR5       |
| TTC1      | 1.73E-43 | -0.315139147 | 0.244 | 0.323 | 4.17E-39 | lobular | TTC1          |
| HLA-C     | 2.23E-43 | 0.337330652  | 0.346 | 0.262 | 5.37E-39 | lobular | HLA-C         |
| NUP153    | 2.23E-43 | 0.265996505  | 0.318 | 0.228 | 5.37E-39 | lobular | NUP153        |
| TEAD1     | 2.45E-43 | 0.278661253  | 0.491 | 0.394 | 5.91E-39 | lobular | TEAD1         |
| RBPMS     | 3.21E-43 | -0.357114316 | 0.639 | 0.697 | 7.74E-39 | lobular | RBPMS         |
| ARID4B    | 3.32E-43 | 0.283983033  | 0.593 | 0.498 | 7.99E-39 | lobular | ARID4B        |
| CASC15    | 6.54E-43 | 0.580943484  | 0.547 | 0.485 | 1.58E-38 | lobular | CASC15        |
| USP25     | 1.59E-42 | 0.296751993  | 0.292 | 0.209 | 3.83E-38 | lobular | USP25         |
| TNRC6B    | 1.78E-42 | 0.266207546  | 0.524 | 0.43  | 4.28E-38 | lobular | TNRC6B        |
| B4GALT1   | 1.80E-42 | 0.252210358  | 0.477 | 0.381 | 4.34E-38 | lobular | B4GALT1       |
| ASTN2     | 3.64E-42 | 0.302774418  | 0.307 | 0.222 | 8.79E-38 | lobular | ASTN2         |
| NEAT1     | 4.87E-42 | -0.27713743  | 0.938 | 0.964 | 1.18E-37 | lobular | NEAT1         |
| PPP3CA    | 5.09E-42 | 0.312091652  | 0.596 | 0.514 | 1.23E-37 | lobular | PPP3CA        |
| SOS1      | 1.56E-41 | 0.2746161    | 0.405 | 0.315 | 3.76E-37 | lobular | SOS1          |
| MARCKS    | 1.65E-41 | -0.365769703 | 0.322 | 0.4   | 3.99E-37 | lobular | MARCKS        |
| CCDC6     | 2.26E-41 | 0.30086367   | 0.351 | 0.266 | 5.46E-37 | lobular | CCDC6         |
| SMAD2     | 1.04E-40 | 0.274099557  | 0.337 | 0.253 | 2.50E-36 | lobular | SMAD2         |
| CXCL1     | 1.60E-40 | 0.826750129  | 0.3   | 0.224 | 3.86E-36 | lobular | CXCL1         |

|         |          |              |       |       |          |         |         |
|---------|----------|--------------|-------|-------|----------|---------|---------|
| ANKRD12 | 1.68E-40 | 0.254682037  | 0.702 | 0.629 | 4.06E-36 | lobular | ANKRD12 |
| OVOS2   | 2.06E-40 | -0.432405593 | 0.238 | 0.324 | 4.97E-36 | lobular | OVOS2   |
| WWP1    | 2.25E-40 | 0.284636007  | 0.344 | 0.262 | 5.42E-36 | lobular | WWP1    |
| SCOC    | 2.86E-40 | -0.258124411 | 0.213 | 0.291 | 6.89E-36 | lobular | SCOC    |
| NSRP1   | 3.20E-40 | -0.279907825 | 0.184 | 0.257 | 7.73E-36 | lobular | NSRP1   |
| CXCL8   | 3.86E-40 | -0.868712617 | 0.416 | 0.499 | 9.31E-36 | lobular | CXCL8   |
| CLASP2  | 4.88E-40 | 0.273200685  | 0.306 | 0.223 | 1.18E-35 | lobular | CLASP2  |
| IER3    | 1.17E-39 | 0.283325216  | 0.353 | 0.267 | 2.83E-35 | lobular | IER3    |
| CAPZA2  | 1.39E-39 | -0.292726264 | 0.28  | 0.357 | 3.36E-35 | lobular | CAPZA2  |
| GNL3    | 1.78E-39 | -0.297840904 | 0.219 | 0.295 | 4.30E-35 | lobular | GNL3    |
| COPZ1   | 1.88E-39 | -0.259683395 | 0.292 | 0.375 | 4.53E-35 | lobular | COPZ1   |
| JUN     | 2.73E-39 | 0.301053023  | 0.266 | 0.189 | 6.57E-35 | lobular | JUN     |
| PCM1    | 3.13E-39 | 0.258072852  | 0.29  | 0.209 | 7.56E-35 | lobular | PCM1    |
| DPYD    | 5.21E-39 | -0.297142955 | 0.492 | 0.569 | 1.26E-34 | lobular | DPYD    |
| WDFY2   | 8.76E-39 | 0.261963912  | 0.298 | 0.216 | 2.11E-34 | lobular | WDFY2   |
| MRPL22  | 9.39E-39 | -0.279325672 | 0.19  | 0.263 | 2.26E-34 | lobular | MRPL22  |
| CDK8    | 1.70E-38 | 0.319654541  | 0.271 | 0.195 | 4.10E-34 | lobular | CDK8    |
| PELI1   | 1.93E-38 | -0.365238139 | 0.302 | 0.377 | 4.65E-34 | lobular | PELI1   |
| KDM6A   | 2.04E-38 | 0.250534289  | 0.402 | 0.312 | 4.93E-34 | lobular | KDM6A   |
| LRRFIP2 | 2.73E-38 | -0.563876559 | 0.756 | 0.775 | 6.59E-34 | lobular | LRRFIP2 |
| MACF1   | 4.72E-38 | 0.280333596  | 0.748 | 0.678 | 1.14E-33 | lobular | MACF1   |
| TXN     | 6.51E-38 | -0.326192722 | 0.664 | 0.697 | 1.57E-33 | lobular | TXN     |
| EPB41L5 | 1.31E-37 | 0.263229608  | 0.329 | 0.246 | 3.16E-33 | lobular | EPB41L5 |
| LMNA    | 1.86E-37 | 0.264249999  | 0.263 | 0.184 | 4.48E-33 | lobular | LMNA    |
| TMA7    | 2.23E-37 | 0.308481366  | 0.631 | 0.557 | 5.37E-33 | lobular | TMA7    |
| STAT3   | 2.57E-37 | 0.273013662  | 0.568 | 0.492 | 6.19E-33 | lobular | STAT3   |
| SFRP1   | 3.33E-37 | -0.271330429 | 0.199 | 0.272 | 8.03E-33 | lobular | SFRP1   |
| ANKRD17 | 5.43E-37 | 0.253500126  | 0.542 | 0.456 | 1.31E-32 | lobular | ANKRD17 |
| GAREM1  | 6.56E-37 | 0.278391206  | 0.352 | 0.271 | 1.58E-32 | lobular | GAREM1  |
| TBC1D8  | 9.73E-37 | 0.257102421  | 0.464 | 0.376 | 2.35E-32 | lobular | TBC1D8  |
| DHRX    | 1.27E-36 | 0.27633184   | 0.309 | 0.228 | 3.05E-32 | lobular | DHRX    |
| CLMN    | 1.30E-36 | -0.384779269 | 0.512 | 0.571 | 3.13E-32 | lobular | CLMN    |
| RBMS1   | 1.83E-36 | 0.307301629  | 0.376 | 0.296 | 4.41E-32 | lobular | RBMS1   |
| NTN4    | 9.01E-36 | 0.272032556  | 0.332 | 0.252 | 2.17E-31 | lobular | NTN4    |
| ATP5F1  | 9.32E-36 | -0.260841886 | 0.346 | 0.422 | 2.25E-31 | lobular | ATP5F1  |
| FAM19A2 | 1.05E-35 | 0.413235572  | 0.626 | 0.545 | 2.54E-31 | lobular | FAM19A2 |
| PBX1    | 1.13E-35 | 0.253940805  | 0.294 | 0.215 | 2.72E-31 | lobular | PBX1    |
| TMOD3   | 1.52E-35 | 0.279685197  | 0.434 | 0.356 | 3.68E-31 | lobular | TMOD3   |
| S100A11 | 1.83E-35 | -0.330233016 | 0.709 | 0.751 | 4.42E-31 | lobular | S100A11 |
| DENND4A | 2.75E-35 | 0.388182565  | 0.619 | 0.556 | 6.62E-31 | lobular | DENND4A |
| BTF3    | 4.10E-35 | 0.450977285  | 0.878 | 0.907 | 9.89E-31 | lobular | BTF3    |
| FMNL2   | 6.46E-35 | -0.426506093 | 0.329 | 0.395 | 1.56E-30 | lobular | FMNL2   |
| PTGES3  | 1.15E-34 | 0.26034502   | 0.272 | 0.199 | 2.76E-30 | lobular | PTGES3  |
| TCEAL8  | 2.77E-34 | -0.265647044 | 0.209 | 0.278 | 6.68E-30 | lobular | TCEAL8  |
| SESTD1  | 2.95E-34 | -0.304518118 | 0.465 | 0.53  | 7.12E-30 | lobular | SESTD1  |
| NRIP1   | 3.07E-34 | 0.273717191  | 0.299 | 0.223 | 7.41E-30 | lobular | NRIP1   |
| RNF24   | 1.35E-33 | -0.306152292 | 0.307 | 0.377 | 3.26E-29 | lobular | RNF24   |



|            |          |              |       |       |          |         |            |
|------------|----------|--------------|-------|-------|----------|---------|------------|
| CHD9       | 1.69E-33 | -0.2984741   | 0.378 | 0.445 | 4.06E-29 | lobular | CHD9       |
| TMTC2      | 1.75E-33 | 0.255035282  | 0.411 | 0.327 | 4.23E-29 | lobular | TMTC2      |
| FDFT1      | 2.36E-33 | 0.262290527  | 0.344 | 0.268 | 5.69E-29 | lobular | FDFT1      |
| SMAD3      | 4.17E-33 | 0.314881433  | 0.298 | 0.23  | 1.01E-28 | lobular | SMAD3      |
| GPD2       | 9.53E-33 | 0.311547071  | 0.36  | 0.287 | 2.30E-28 | lobular | GPD2       |
| STK39      | 9.67E-33 | 0.388839003  | 0.267 | 0.196 | 2.33E-28 | lobular | STK39      |
| MAML3      | 1.21E-32 | 0.313901227  | 0.381 | 0.305 | 2.92E-28 | lobular | MAML3      |
| FRYL       | 1.69E-32 | 0.261671492  | 0.428 | 0.351 | 4.07E-28 | lobular | FRYL       |
| RAPGEF5    | 2.20E-32 | -0.31105566  | 0.312 | 0.385 | 5.30E-28 | lobular | RAPGEF5    |
| PSMC6      | 2.34E-32 | -0.275365565 | 0.291 | 0.359 | 5.64E-28 | lobular | PSMC6      |
| MMADHC     | 5.74E-32 | -0.265487469 | 0.284 | 0.351 | 1.38E-27 | lobular | MMADHC     |
| PIN4       | 7.61E-32 | -0.257863758 | 0.243 | 0.311 | 1.84E-27 | lobular | PIN4       |
| REL        | 1.38E-31 | 0.255724162  | 0.33  | 0.255 | 3.33E-27 | lobular | REL        |
| SEC11A     | 2.34E-31 | -0.250782165 | 0.461 | 0.524 | 5.63E-27 | lobular | SEC11A     |
| EIF4E2     | 4.14E-31 | -0.25400183  | 0.3   | 0.365 | 9.98E-27 | lobular | EIF4E2     |
| IRF2       | 6.59E-31 | -0.258086817 | 0.209 | 0.274 | 1.59E-26 | lobular | IRF2       |
| CX3CL1     | 9.76E-31 | 0.262721801  | 0.259 | 0.189 | 2.35E-26 | lobular | CX3CL1     |
| SPATS2L    | 1.32E-30 | -0.322681896 | 0.216 | 0.279 | 3.19E-26 | lobular | SPATS2L    |
| NDUFB4     | 1.43E-30 | 0.262547702  | 0.467 | 0.386 | 3.44E-26 | lobular | NDUFB4     |
| PSTPIP2    | 1.59E-30 | -0.362478257 | 0.203 | 0.265 | 3.83E-26 | lobular | PSTPIP2    |
| ARHGEF38   | 5.28E-30 | 0.288343551  | 0.513 | 0.44  | 1.27E-25 | lobular | ARHGEF38   |
| SORBS2     | 6.82E-30 | -0.44267285  | 0.356 | 0.423 | 1.64E-25 | lobular | SORBS2     |
| DAPK2      | 7.57E-30 | -0.281008812 | 0.21  | 0.275 | 1.82E-25 | lobular | DAPK2      |
| PRDM2      | 1.96E-29 | 0.318579717  | 0.325 | 0.252 | 4.73E-25 | lobular | PRDM2      |
| GPRC5A     | 2.12E-29 | 0.27820975   | 0.42  | 0.346 | 5.11E-25 | lobular | GPRC5A     |
| HES1       | 2.24E-29 | 0.409825389  | 0.371 | 0.3   | 5.40E-25 | lobular | HES1       |
| PALLD      | 3.53E-29 | -0.349049516 | 0.381 | 0.439 | 8.51E-25 | lobular | PALLD      |
| PSMD11     | 8.70E-29 | -0.267004151 | 0.235 | 0.297 | 2.10E-24 | lobular | PSMD11     |
| CAPN2      | 1.24E-28 | -0.259521803 | 0.27  | 0.335 | 2.98E-24 | lobular | CAPN2      |
| PNRC1      | 3.44E-28 | -0.279586325 | 0.397 | 0.454 | 8.29E-24 | lobular | PNRC1      |
| TJP2       | 3.65E-28 | -0.329644375 | 0.301 | 0.358 | 8.79E-24 | lobular | TJP2       |
| RPS2       | 5.54E-28 | 0.278728476  | 0.303 | 0.231 | 1.34E-23 | lobular | RPS2       |
| ABHD18     | 9.51E-28 | 0.271354829  | 0.372 | 0.303 | 2.29E-23 | lobular | ABHD18     |
| RASA2      | 2.73E-27 | -0.336641372 | 0.521 | 0.573 | 6.58E-23 | lobular | RASA2      |
| YPEL5      | 2.81E-27 | -0.288254474 | 0.38  | 0.436 | 6.76E-23 | lobular | YPEL5      |
| RIPK2      | 3.78E-27 | -0.362925506 | 0.258 | 0.318 | 9.12E-23 | lobular | RIPK2      |
| HNRNPA3    | 3.99E-27 | -0.257383514 | 0.242 | 0.302 | 9.63E-23 | lobular | HNRNPA3    |
| CAST       | 1.21E-26 | -0.254268522 | 0.494 | 0.546 | 2.93E-22 | lobular | CAST       |
| TPT1-AS1   | 1.83E-26 | -0.27866689  | 0.214 | 0.272 | 4.42E-22 | lobular | TPT1-AS1   |
| GLUL       | 2.01E-26 | 0.250815655  | 0.407 | 0.331 | 4.84E-22 | lobular | GLUL       |
| AC016831.1 | 3.90E-26 | -0.306951453 | 0.236 | 0.296 | 9.40E-22 | lobular | AC016831.7 |
| MAP4K5     | 4.73E-26 | -0.302383327 | 0.265 | 0.325 | 1.14E-21 | lobular | MAP4K5     |
| ARHGEF10   | 1.51E-25 | -0.338956013 | 0.2   | 0.254 | 3.65E-21 | lobular | ARHGEF10   |
| SEPP1      | 1.53E-25 | 0.262267563  | 0.339 | 0.272 | 3.69E-21 | lobular | SEPP1      |
| S100A14    | 4.09E-25 | -0.267454518 | 0.724 | 0.754 | 9.86E-21 | lobular | S100A14    |
| CD55       | 4.50E-25 | -0.281018936 | 0.269 | 0.326 | 1.08E-20 | lobular | CD55       |
| PTBP2      | 9.05E-25 | -0.265052147 | 0.324 | 0.381 | 2.18E-20 | lobular | PTBP2      |

|           |          |              |       |       |          |         |             |
|-----------|----------|--------------|-------|-------|----------|---------|-------------|
| CMIP      | 1.24E-24 | -0.268505439 | 0.246 | 0.303 | 2.99E-20 | lobular | CMIP        |
| JARID2    | 3.11E-24 | 0.378592599  | 0.277 | 0.215 | 7.49E-20 | lobular | JARID2      |
| MPZL1     | 3.51E-24 | -0.267344084 | 0.355 | 0.41  | 8.46E-20 | lobular | MPZL1       |
| RPSA      | 5.14E-24 | 0.431356109  | 0.798 | 0.831 | 1.24E-19 | lobular | RPSA        |
| EXT1      | 9.46E-24 | -0.303487422 | 0.478 | 0.531 | 2.28E-19 | lobular | EXT1        |
| CRIM1     | 1.25E-23 | -0.372928769 | 0.424 | 0.469 | 3.02E-19 | lobular | CRIM1       |
| LSAMP     | 2.35E-23 | 0.44204311   | 0.487 | 0.449 | 5.67E-19 | lobular | LSAMP       |
| PDE8A     | 6.30E-23 | -0.275173431 | 0.308 | 0.363 | 1.52E-18 | lobular | PDE8A       |
| CLK1      | 4.02E-22 | -0.275417545 | 0.399 | 0.45  | 9.69E-18 | lobular | CLK1        |
| KDM7A     | 4.64E-21 | -0.253560606 | 0.257 | 0.308 | 1.12E-16 | lobular | KDM7A       |
| TACSTD2   | 7.05E-21 | 0.31891673   | 0.739 | 0.717 | 1.70E-16 | lobular | TACSTD2     |
| ATP13A3   | 3.57E-19 | -0.286541461 | 0.245 | 0.293 | 8.62E-15 | lobular | ATP13A3     |
| RPS27     | 4.59E-19 | -1.065799586 | 0.631 | 0.648 | 1.11E-14 | lobular | RPS27       |
| ERO1A     | 3.66E-18 | -0.355366203 | 0.426 | 0.467 | 8.84E-14 | lobular | ERO1A       |
| ADAM17    | 3.69E-18 | -0.267581125 | 0.368 | 0.41  | 8.90E-14 | lobular | ADAM17      |
| HIVEP2    | 1.18E-17 | 0.379451804  | 0.465 | 0.429 | 2.85E-13 | lobular | HIVEP2      |
| DHFR      | 9.13E-15 | -0.262560868 | 0.794 | 0.786 | 2.20E-10 | lobular | DHFR        |
| DAAM1     | 7.74E-13 | -0.299100891 | 0.501 | 0.524 | 1.87E-08 | lobular | DAAM1       |
| RP11-37B2 | 2.45E-12 | -0.259501697 | 0.214 | 0.25  | 5.90E-08 | lobular | RP11-37B2.1 |
| TNFSF10   | 9.84E-12 | -0.395674103 | 0.466 | 0.487 | 2.37E-07 | lobular | TNFSF10     |
| FOSB      | 1.53E-11 | -0.262509169 | 0.386 | 0.413 | 3.68E-07 | lobular | FOSB        |
| IFRD1     | 2.64E-11 | -0.253683866 | 0.342 | 0.37  | 6.38E-07 | lobular | IFRD1       |
| ATP5EP2   | 2.93E-11 | 0.265058578  | 0.317 | 0.287 | 7.06E-07 | lobular | ATP5EP2     |
| BAIAP2L1  | 2.14E-10 | 0.355432154  | 0.911 | 0.953 | 5.17E-06 | lobular | BAIAP2L1    |
| DAPK1     | 3.37E-10 | -0.364604726 | 0.577 | 0.462 | 8.13E-06 | lobular | DAPK1       |
| ADAM9     | 4.98E-10 | -0.266710572 | 0.563 | 0.579 | 1.20E-05 | lobular | ADAM9       |
| CCL2.1    | 0        | 2.725122155  | 0.447 | 0.148 | 0        | ductal  | CCL2        |
| MGP.1     | 0        | 2.262830937  | 0.952 | 0.74  | 0        | ductal  | MGP         |
| TNFAIP6.1 | 0        | 2.151492186  | 0.357 | 0.114 | 0        | ductal  | TNFAIP6     |
| PTN.1     | 0        | 2.024538586  | 0.275 | 0.018 | 0        | ductal  | PTN         |
| ANXA1.1   | 0        | 1.812768301  | 0.771 | 0.514 | 0        | ductal  | ANXA1       |
| SLPI.1    | 0        | 1.787375225  | 0.781 | 0.414 | 0        | ductal  | SLPI        |
| FAM177B.1 | 0        | 1.657631728  | 0.693 | 0.375 | 0        | ductal  | FAM177B     |
| PDE4B.1   | 0        | 1.521512584  | 0.698 | 0.411 | 0        | ductal  | PDE4B       |
| B2M.1     | 0        | 1.35009724   | 0.986 | 0.963 | 0        | ductal  | B2M         |
| AKT3.1    | 0        | 1.347825087  | 0.543 | 0.231 | 0        | ductal  | AKT3        |
| RCAN1.1   | 0        | 1.29291809   | 0.54  | 0.311 | 0        | ductal  | RCAN1       |
| SDCBP.1   | 0        | 1.275730213  | 0.77  | 0.528 | 0        | ductal  | SDCBP       |
| STEAP1B.1 | 0        | 1.243422608  | 0.954 | 0.922 | 0        | ductal  | STEAP1B     |
| ANKRD36C  | 0        | 1.213598799  | 0.633 | 0.356 | 0        | ductal  | ANKRD36C    |
| ALDH1A3.1 | 0        | 1.206707653  | 0.441 | 0.18  | 0        | ductal  | ALDH1A3     |
| LTF.1     | 0        | 1.189813971  | 0.513 | 0.244 | 0        | ductal  | LTF         |
| PGK1.1    | 0        | 1.153963297  | 0.709 | 0.465 | 0        | ductal  | PGK1        |
| FAM172A.1 | 0        | 1.129217956  | 0.749 | 0.541 | 0        | ductal  | FAM172A     |
| PCNXL2.1  | 0        | 1.117886167  | 0.864 | 0.705 | 0        | ductal  | PCNXL2      |
| EPB42.1   | 0        | 1.099491879  | 0.94  | 0.869 | 0        | ductal  | EPB42       |
| PSME2.1   | 0        | 1.089003029  | 0.456 | 0.198 | 0        | ductal  | PSME2       |

|           |   |              |       |       |          |               |
|-----------|---|--------------|-------|-------|----------|---------------|
| TSHZ2.1   | 0 | 1.077660036  | 0.397 | 0.163 | 0 ductal | TSHZ2         |
| PTEN.1    | 0 | 1.072595202  | 0.89  | 0.759 | 0 ductal | PTEN          |
| RPL21.1   | 0 | 1.069539434  | 0.951 | 0.822 | 0 ductal | RPL21         |
| GRB14.1   | 0 | 1.067678487  | 0.556 | 0.323 | 0 ductal | GRB14         |
| SOD2.1    | 0 | 1.030661906  | 0.885 | 0.714 | 0 ductal | SOD2          |
| UBC.1     | 0 | 1.014091205  | 0.963 | 0.861 | 0 ductal | UBC           |
| RP11-795H | 0 | 1.002727826  | 0.512 | 0.273 | 0 ductal | RP11-795H16.3 |
| MET.1     | 0 | 0.917931571  | 0.365 | 0.146 | 0 ductal | MET           |
| RP11-356C | 0 | 0.908074306  | 0.27  | 0.078 | 0 ductal | RP11-356C4.5  |
| RPS3A.1   | 0 | 0.890992547  | 0.95  | 0.869 | 0 ductal | RPS3A         |
| SEC61G.1  | 0 | 0.862317764  | 0.727 | 0.524 | 0 ductal | SEC61G        |
| SON.1     | 0 | 0.813488169  | 0.777 | 0.623 | 0 ductal | SON           |
| ANXA2.1   | 0 | 0.774807154  | 0.943 | 0.917 | 0 ductal | ANXA2         |
| NPM1.1    | 0 | 0.749023387  | 0.836 | 0.642 | 0 ductal | NPM1          |
| RBFOX2.1  | 0 | 0.732646875  | 0.971 | 0.94  | 0 ductal | RBFOX2        |
| ADGRL3-AS | 0 | 0.729782258  | 0.729 | 0.521 | 0 ductal | ADGRL3-AS1    |
| SKP1.1    | 0 | 0.718890034  | 0.875 | 0.767 | 0 ductal | SKP1          |
| PLEKHA6.1 | 0 | 0.716527974  | 0.91  | 0.787 | 0 ductal | PLEKHA6       |
| RPL24.1   | 0 | 0.676667684  | 0.954 | 0.894 | 0 ductal | RPL24         |
| SLC47A1.1 | 0 | 0.641508596  | 0.952 | 0.863 | 0 ductal | SLC47A1       |
| LINC00486 | 0 | 0.61251405   | 0.993 | 0.984 | 0 ductal | LINC00486     |
| KIZ-AS1.1 | 0 | 0.596703007  | 0.914 | 0.802 | 0 ductal | KIZ-AS1       |
| RPL34.1   | 0 | 0.592745866  | 0.983 | 0.975 | 0 ductal | RPL34         |
| RPL39.1   | 0 | 0.509772286  | 0.944 | 0.871 | 0 ductal | RPL39         |
| EEF1A1.1  | 0 | 0.481011136  | 0.983 | 0.97  | 0 ductal | EEF1A1        |
| RPL37A.1  | 0 | 0.406225757  | 0.98  | 0.971 | 0 ductal | RPL37A        |
| MT-ATP6.1 | 0 | -0.534050557 | 0.984 | 0.995 | 0 ductal | MT-ATP6       |
| TPT1.1    | 0 | -0.540946218 | 0.761 | 0.907 | 0 ductal | TPT1          |
| RPS14.1   | 0 | -0.558013124 | 0.234 | 0.519 | 0 ductal | RPS14         |
| MT-ND1.1  | 0 | -0.577968263 | 0.961 | 0.991 | 0 ductal | MT-ND1        |
| OST4.1    | 0 | -0.832455471 | 0.244 | 0.519 | 0 ductal | OST4          |
| RPS8.1    | 0 | -0.845433614 | 0.587 | 0.828 | 0 ductal | RPS8          |
| COX4I1.1  | 0 | -0.871950883 | 0.666 | 0.839 | 0 ductal | COX4I1        |
| GNB2L1.1  | 0 | -0.905572278 | 0.506 | 0.772 | 0 ductal | GNB2L1        |
| ACTG1.1   | 0 | -0.910288446 | 0.601 | 0.8   | 0 ductal | ACTG1         |
| RPL15.1   | 0 | -0.949047938 | 0.631 | 0.867 | 0 ductal | RPL15         |
| AMBRA1.1  | 0 | -0.955761452 | 0.494 | 0.787 | 0 ductal | AMBRA1        |
| SERF2.1   | 0 | -0.956735644 | 0.176 | 0.527 | 0 ductal | SERF2         |
| GNAS.1    | 0 | -0.977566622 | 0.61  | 0.839 | 0 ductal | GNAS          |
| RPS18.1   | 0 | -0.988999102 | 0.436 | 0.756 | 0 ductal | RPS18         |
| AREG.1    | 0 | -1.04445651  | 0.272 | 0.561 | 0 ductal | AREG          |
| NBEAL1.1  | 0 | -1.055255649 | 0.529 | 0.828 | 0 ductal | NBEAL1        |
| FTL.1     | 0 | -1.113596813 | 0.326 | 0.655 | 0 ductal | FTL           |
| RPL10A.1  | 0 | -1.129483999 | 0.582 | 0.799 | 0 ductal | RPL10A        |
| ERBB4.1   | 0 | -1.137604686 | 0.309 | 0.605 | 0 ductal | ERBB4         |
| EIF2B5.1  | 0 | -1.151714614 | 0.315 | 0.55  | 0 ductal | EIF2B5        |
| PTHLH.1   | 0 | -1.178957482 | 0.081 | 0.331 | 0 ductal | PTHLH         |

|            |           |              |       |       |           |        |           |
|------------|-----------|--------------|-------|-------|-----------|--------|-----------|
| ANKRD30A   | 0         | -1.20772945  | 0.263 | 0.6   | 0         | ductal | ANKRD30A  |
| HPX.1      | 0         | -1.22775497  | 0.07  | 0.304 | 0         | ductal | HPX       |
| RPLP0.1    | 0         | -1.33754745  | 0.794 | 0.91  | 0         | ductal | RPLP0     |
| RPL19.1    | 0         | -1.369488293 | 0.855 | 0.93  | 0         | ductal | RPL19     |
| DIO2.1     | 0         | -1.371056782 | 0.083 | 0.31  | 0         | ductal | DIO2      |
| RPS12.1    | 0         | -1.41506119  | 0.503 | 0.737 | 0         | ductal | RPS12     |
| TMSB10.1   | 0         | -1.579126235 | 0.491 | 0.878 | 0         | ductal | TMSB10    |
| RPS11.1    | 0         | -1.653818756 | 0.564 | 0.894 | 0         | ductal | RPS11     |
| RPS3.1     | 0         | -1.81604144  | 0.843 | 0.884 | 0         | ductal | RPS3      |
| RPL10.1    | 0         | -1.819908231 | 0.912 | 0.949 | 0         | ductal | RPL10     |
| HINT1.1    | 7.47E-306 | -0.728819844 | 0.472 | 0.68  | 1.80E-301 | ductal | HINT1     |
| EIF4A2.1   | 5.87E-304 | 0.785508174  | 0.787 | 0.644 | 1.41E-299 | ductal | EIF4A2    |
| PI3.1      | 7.87E-300 | 1.72874024   | 0.264 | 0.078 | 1.90E-295 | ductal | PI3       |
| GCNT2.1    | 2.02E-296 | -1.073512747 | 0.294 | 0.537 | 4.87E-292 | ductal | GCNT2     |
| PSMA4.1    | 2.62E-296 | 0.906113528  | 0.571 | 0.363 | 6.33E-292 | ductal | PSMA4     |
| MT-ND2.1   | 3.00E-296 | -0.425266432 | 0.959 | 0.988 | 7.23E-292 | ductal | MT-ND2    |
| SLC25A37.1 | 7.42E-296 | 1.012555721  | 0.533 | 0.298 | 1.79E-291 | ductal | SLC25A37  |
| EREG.1     | 1.91E-295 | -1.129437377 | 0.119 | 0.349 | 4.60E-291 | ductal | EREG      |
| RPS20.1    | 2.44E-295 | -0.931541542 | 0.925 | 0.924 | 5.89E-291 | ductal | RPS20     |
| PRSS23.1   | 8.79E-295 | -0.927162491 | 0.087 | 0.304 | 2.12E-290 | ductal | PRSS23    |
| RPL35.1    | 2.23E-292 | -0.547413043 | 0.12  | 0.371 | 5.38E-288 | ductal | RPL35     |
| PTMA.1     | 9.27E-285 | -0.70340638  | 0.487 | 0.703 | 2.23E-280 | ductal | PTMA      |
| C8orf4.1   | 2.34E-284 | -0.70153973  | 0.332 | 0.635 | 5.64E-280 | ductal | C8orf4    |
| ALCAM.1    | 1.91E-279 | -1.006126082 | 0.375 | 0.597 | 4.62E-275 | ductal | ALCAM     |
| MT-CO3.1   | 4.71E-276 | -0.388237544 | 0.992 | 0.997 | 1.13E-271 | ductal | MT-CO3    |
| CPEB2.1    | 5.00E-274 | -0.918324418 | 0.167 | 0.397 | 1.21E-269 | ductal | CPEB2     |
| PRDX1.1    | 5.92E-274 | 0.869905189  | 0.765 | 0.637 | 1.43E-269 | ductal | PRDX1     |
| FAM129A.1  | 7.40E-272 | 1.19688608   | 0.402 | 0.197 | 1.79E-267 | ductal | FAM129A   |
| SLC26A3.1  | 2.34E-264 | 0.696763643  | 0.864 | 0.746 | 5.65E-260 | ductal | SLC26A3   |
| EFHD1.1    | 6.92E-264 | -0.853468492 | 0.162 | 0.386 | 1.67E-259 | ductal | EFHD1     |
| AFF3.1     | 3.93E-261 | -1.109166937 | 0.199 | 0.426 | 9.49E-257 | ductal | AFF3      |
| ARRDC3.1   | 2.60E-256 | 0.864813579  | 0.519 | 0.305 | 6.27E-252 | ductal | ARRDC3    |
| SEC62.1    | 5.01E-255 | 0.643444507  | 0.693 | 0.511 | 1.21E-250 | ductal | SEC62     |
| POMP.1     | 2.82E-252 | 0.688236785  | 0.723 | 0.579 | 6.80E-248 | ductal | POMP      |
| TNC.1      | 6.45E-252 | -0.980565083 | 0.197 | 0.415 | 1.55E-247 | ductal | TNC       |
| HSP90AB1.1 | 1.51E-249 | 0.582403055  | 0.895 | 0.807 | 3.65E-245 | ductal | HSP90AB1  |
| RPS7.1     | 1.32E-247 | 0.339920161  | 0.963 | 0.889 | 3.18E-243 | ductal | RPS7      |
| H2AFZ.1    | 4.11E-246 | -0.742461407 | 0.568 | 0.733 | 9.92E-242 | ductal | H2AFZ     |
| EFNA1.1    | 5.17E-246 | -0.902050068 | 0.115 | 0.316 | 1.25E-241 | ductal | EFNA1     |
| MYBPC1.1   | 1.35E-245 | -1.038135522 | 0.106 | 0.311 | 3.25E-241 | ductal | MYBPC1    |
| BIRC3.1    | 4.91E-244 | 0.74761515   | 0.73  | 0.543 | 1.18E-239 | ductal | BIRC3     |
| RAB11FIP1  | 1.68E-243 | -0.930657497 | 0.658 | 0.781 | 4.04E-239 | ductal | RAB11FIP1 |
| CXCL13.1   | 5.97E-243 | -0.648141877 | 0.269 | 0.5   | 1.44E-238 | ductal | CXCL13    |
| KIAA1324.1 | 1.14E-238 | -0.702053588 | 0.106 | 0.304 | 2.75E-234 | ductal | KIAA1324  |
| RPL9.1     | 8.72E-237 | 0.666902878  | 0.675 | 0.508 | 2.10E-232 | ductal | RPL9      |
| SMIM14.1   | 1.82E-236 | -0.781861995 | 0.269 | 0.48  | 4.39E-232 | ductal | SMIM14    |
| TBX3.1     | 2.11E-236 | -0.798212627 | 0.145 | 0.348 | 5.09E-232 | ductal | TBX3      |

|            |           |              |       |       |           |        |           |
|------------|-----------|--------------|-------|-------|-----------|--------|-----------|
| RPS6.1     | 4.18E-235 | 0.40453666   | 0.985 | 0.974 | 1.01E-230 | ductal | RPS6      |
| MAML2.1    | 4.28E-234 | 0.787481138  | 0.554 | 0.336 | 1.03E-229 | ductal | MAML2     |
| GLIS3.1    | 2.35E-231 | 0.801683136  | 0.265 | 0.099 | 5.66E-227 | ductal | GLIS3     |
| SLC28A3.1  | 4.17E-231 | 0.719107526  | 0.286 | 0.113 | 1.01E-226 | ductal | SLC28A3   |
| BTG1.1     | 1.39E-230 | -0.69733317  | 0.461 | 0.655 | 3.35E-226 | ductal | BTG1      |
| TSPAN5.1   | 2.32E-230 | -0.859026918 | 0.178 | 0.389 | 5.61E-226 | ductal | TSPAN5    |
| RASGEF1B.  | 1.14E-229 | 0.541126374  | 0.947 | 0.859 | 2.76E-225 | ductal | RASGEF1B  |
| ADAMTS9.   | 1.36E-229 | 1.003982756  | 0.329 | 0.144 | 3.29E-225 | ductal | ADAMTS9   |
| ST6GALNA5  | 5.46E-228 | 0.975553795  | 0.297 | 0.122 | 1.32E-223 | ductal | ST6GALNA5 |
| RNF181.1   | 6.48E-228 | 0.702127179  | 0.51  | 0.315 | 1.56E-223 | ductal | RNF181    |
| FXYD3.1    | 1.44E-225 | -0.739965568 | 0.518 | 0.704 | 3.47E-221 | ductal | FXYD3     |
| SLC7A2.1   | 6.79E-225 | -0.771745132 | 0.173 | 0.38  | 1.64E-220 | ductal | SLC7A2    |
| C15orf48.1 | 1.16E-224 | 1.303795184  | 0.606 | 0.436 | 2.80E-220 | ductal | C15orf48  |
| GABRP.1    | 5.48E-223 | 0.873785178  | 0.385 | 0.195 | 1.32E-218 | ductal | GABRP     |
| SNU13.1    | 3.13E-222 | -0.64135365  | 0.347 | 0.556 | 7.55E-218 | ductal | SNU13     |
| UGCG.1     | 3.04E-220 | -0.679530662 | 0.36  | 0.569 | 7.34E-216 | ductal | UGCG      |
| HNRNPA1.   | 4.60E-219 | 0.665213457  | 0.836 | 0.713 | 1.11E-214 | ductal | HNRNPA1   |
| CPE.1      | 3.62E-211 | -0.738412275 | 0.094 | 0.273 | 8.73E-207 | ductal | CPE       |
| FGF13.1    | 7.94E-208 | -0.860223233 | 0.33  | 0.529 | 1.91E-203 | ductal | FGF13     |
| RPL11.1    | 2.21E-207 | 0.309488245  | 0.98  | 0.947 | 5.32E-203 | ductal | RPL11     |
| DYNLRB1.1  | 7.63E-205 | -0.557545789 | 0.186 | 0.391 | 1.84E-200 | ductal | DYNLRB1   |
| MAP3K13.   | 3.14E-204 | 0.780528994  | 0.715 | 0.566 | 7.58E-200 | ductal | MAP3K13   |
| SOX4.1     | 4.06E-203 | -0.454278113 | 0.743 | 0.897 | 9.78E-199 | ductal | SOX4      |
| RPS17.1    | 9.15E-202 | 0.384511078  | 0.964 | 0.927 | 2.21E-197 | ductal | RPS17     |
| RPS27A.1   | 3.48E-201 | 0.273840503  | 0.985 | 0.962 | 8.39E-197 | ductal | RPS27A    |
| RPL37.1    | 4.54E-200 | 0.333427488  | 0.967 | 0.933 | 1.09E-195 | ductal | RPL37     |
| ANKS1B.1   | 1.05E-199 | -0.768393564 | 0.338 | 0.536 | 2.52E-195 | ductal | ANKS1B    |
| SELK.1     | 9.39E-199 | 0.601320794  | 0.711 | 0.553 | 2.26E-194 | ductal | SELK      |
| PSMA3.1    | 2.78E-198 | 0.672356934  | 0.452 | 0.272 | 6.71E-194 | ductal | PSMA3     |
| STAT5B.1   | 4.42E-196 | -0.675069398 | 0.211 | 0.407 | 1.06E-191 | ductal | STAT5B    |
| APBB2.1    | 3.66E-191 | -0.786350288 | 0.147 | 0.326 | 8.81E-187 | ductal | APBB2     |
| LINGO1.1   | 1.31E-190 | 0.48281975   | 0.938 | 0.86  | 3.16E-186 | ductal | LINGO1    |
| DAPP1.1    | 6.51E-188 | 0.770088616  | 0.347 | 0.181 | 1.57E-183 | ductal | DAPP1     |
| FBLN5.1    | 3.24E-184 | 1.165776883  | 0.259 | 0.112 | 7.82E-180 | ductal | FBLN5     |
| NDRG1.1    | 2.62E-183 | 0.749438558  | 0.465 | 0.286 | 6.32E-179 | ductal | NDRG1     |
| MAP3K1.1   | 3.19E-183 | -0.754777275 | 0.342 | 0.53  | 7.69E-179 | ductal | MAP3K1    |
| EPS8.1     | 4.78E-183 | 0.78619943   | 0.428 | 0.257 | 1.15E-178 | ductal | EPS8      |
| RPL31.1    | 2.16E-181 | 0.39557886   | 0.958 | 0.905 | 5.22E-177 | ductal | RPL31     |
| ITGAV.1    | 6.23E-179 | -0.672675221 | 0.284 | 0.472 | 1.50E-174 | ductal | ITGAV     |
| COMMD6.    | 3.98E-178 | -0.543039763 | 0.236 | 0.428 | 9.60E-174 | ductal | COMMD6    |
| ACTN1.1    | 1.59E-177 | -0.65542962  | 0.226 | 0.415 | 3.83E-173 | ductal | ACTN1     |
| SAA1.1     | 9.97E-177 | -0.30023426  | 0.816 | 0.681 | 2.40E-172 | ductal | SAA1      |
| CCL20.1    | 3.93E-176 | 2.082814658  | 0.277 | 0.129 | 9.48E-172 | ductal | CCL20     |
| CALD1.1    | 1.76E-175 | 0.902221841  | 0.409 | 0.233 | 4.23E-171 | ductal | CALD1     |
| PSMB7.1    | 2.46E-175 | 0.639444538  | 0.554 | 0.394 | 5.92E-171 | ductal | PSMB7     |
| PSMC1.1    | 8.40E-175 | 0.596301598  | 0.384 | 0.218 | 2.03E-170 | ductal | PSMC1     |
| GNA12.1    | 2.83E-174 | 0.652016769  | 0.404 | 0.239 | 6.83E-170 | ductal | GNA12     |

|           |           |              |       |       |           |        |               |
|-----------|-----------|--------------|-------|-------|-----------|--------|---------------|
| TAGLN2.1  | 2.90E-173 | -0.480140323 | 0.114 | 0.284 | 6.99E-169 | ductal | TAGLN2        |
| MYL12A.1  | 1.24E-172 | 0.53777542   | 0.895 | 0.851 | 3.00E-168 | ductal | MYL12A        |
| CTSB.1    | 8.21E-172 | -0.626395151 | 0.183 | 0.357 | 1.98E-167 | ductal | CTSB          |
| RP1-78O14 | 5.39E-171 | -0.876106024 | 0.106 | 0.265 | 1.30E-166 | ductal | RP1-78O14.1   |
| CD59.1    | 1.01E-169 | 0.686050045  | 0.897 | 0.874 | 2.44E-165 | ductal | CD59          |
| ELOVL5.1  | 1.02E-169 | -0.810120108 | 0.188 | 0.362 | 2.46E-165 | ductal | ELOVL5        |
| RP11-608O | 1.06E-169 | 0.631946125  | 0.645 | 0.476 | 2.55E-165 | ductal | RP11-608O21.1 |
| ARHGAP26  | 4.21E-169 | 0.595104939  | 0.761 | 0.611 | 1.01E-164 | ductal | ARHGAP26      |
| CA8.1     | 1.04E-168 | 0.791629386  | 0.336 | 0.177 | 2.50E-164 | ductal | CA8           |
| COX7C.1   | 1.01E-167 | 0.346659587  | 0.902 | 0.856 | 2.43E-163 | ductal | COX7C         |
| RPL30.1   | 1.82E-166 | 0.297807521  | 0.974 | 0.941 | 4.39E-162 | ductal | RPL30         |
| SEMA3C.1  | 4.42E-166 | -0.751627584 | 0.174 | 0.346 | 1.07E-161 | ductal | SEMA3C        |
| LYN.1     | 7.63E-166 | 0.783722607  | 0.515 | 0.347 | 1.84E-161 | ductal | LYN           |
| NEBL.1    | 2.08E-165 | -0.654932969 | 0.571 | 0.72  | 5.01E-161 | ductal | NEBL          |
| DUSP16.1  | 7.36E-165 | -0.624347037 | 0.31  | 0.491 | 1.77E-160 | ductal | DUSP16        |
| RPLP1.1   | 6.91E-164 | -0.278187617 | 0.174 | 0.359 | 1.67E-159 | ductal | RPLP1         |
| RPL23.1   | 4.93E-163 | 0.350625652  | 0.945 | 0.899 | 1.19E-158 | ductal | RPL23         |
| GSTM3.1   | 4.67E-162 | -0.885069579 | 0.222 | 0.394 | 1.13E-157 | ductal | GSTM3         |
| DNAJC12.1 | 1.51E-161 | -0.551734973 | 0.268 | 0.467 | 3.63E-157 | ductal | DNAJC12       |
| EFNA5.1   | 1.61E-161 | 0.728056884  | 0.385 | 0.221 | 3.88E-157 | ductal | EFNA5         |
| RPL12.1   | 2.38E-161 | -0.540548362 | 0.18  | 0.352 | 5.75E-157 | ductal | RPL12         |
| MT-ND4.1  | 1.01E-160 | -0.324124623 | 0.991 | 0.995 | 2.43E-156 | ductal | MT-ND4        |
| SLC39A6.1 | 1.82E-159 | -0.577589293 | 0.195 | 0.369 | 4.39E-155 | ductal | SLC39A6       |
| RPS9.1    | 2.00E-158 | -0.300883311 | 0.123 | 0.295 | 4.83E-154 | ductal | RPS9          |
| RSL24D1.1 | 2.40E-158 | 0.486832265  | 0.663 | 0.499 | 5.79E-154 | ductal | RSL24D1       |
| SLC27A4.1 | 2.82E-156 | 0.840966834  | 0.787 | 0.656 | 6.80E-152 | ductal | SLC27A4       |
| PSD3.1    | 1.83E-154 | -0.701994758 | 0.242 | 0.412 | 4.42E-150 | ductal | PSD3          |
| CYP7B1.1  | 2.76E-154 | 1.000354873  | 0.323 | 0.177 | 6.66E-150 | ductal | CYP7B1        |
| NCEH1.1   | 6.38E-154 | -0.746132164 | 0.313 | 0.476 | 1.54E-149 | ductal | NCEH1         |
| SUB1.1    | 1.02E-152 | 0.503317303  | 0.718 | 0.591 | 2.47E-148 | ductal | SUB1          |
| NACA.1    | 1.25E-152 | 0.268387352  | 0.945 | 0.887 | 3.01E-148 | ductal | NACA          |
| GAPDH.1   | 3.79E-152 | -0.44928616  | 0.457 | 0.632 | 9.14E-148 | ductal | GAPDH         |
| ERGIC3.1  | 3.93E-152 | -0.530297915 | 0.221 | 0.39  | 9.48E-148 | ductal | ERGIC3        |
| INSIG2.1  | 5.38E-152 | 0.61660419   | 0.303 | 0.158 | 1.30E-147 | ductal | INSIG2        |
| SSR3.1    | 4.93E-151 | 0.58985524   | 0.542 | 0.387 | 1.19E-146 | ductal | SSR3          |
| GLCC1.1   | 7.04E-151 | -0.728450167 | 0.2   | 0.365 | 1.70E-146 | ductal | GLCC1         |
| LUCAT1.1  | 3.73E-149 | 0.637170112  | 0.296 | 0.149 | 8.99E-145 | ductal | LUCAT1        |
| LIPH.1    | 3.78E-149 | 1.104610882  | 0.401 | 0.257 | 9.12E-145 | ductal | LIPH          |
| RPL35A.1  | 1.09E-148 | 0.282018205  | 0.977 | 0.942 | 2.64E-144 | ductal | RPL35A        |
| XBP1.1    | 2.05E-148 | -0.746720838 | 0.289 | 0.455 | 4.95E-144 | ductal | XBP1          |
| PHLDB2.1  | 4.67E-148 | -0.647152125 | 0.315 | 0.484 | 1.13E-143 | ductal | PHLDB2        |
| ZFP36L2.1 | 1.06E-147 | -0.580034539 | 0.26  | 0.441 | 2.56E-143 | ductal | ZFP36L2       |
| TBC1D9.1  | 9.49E-147 | -0.565678292 | 0.34  | 0.517 | 2.29E-142 | ductal | TBC1D9        |
| DSTN.1    | 1.48E-146 | -0.571387199 | 0.486 | 0.645 | 3.57E-142 | ductal | DSTN          |
| SYPL1.1   | 2.81E-146 | 0.545858312  | 0.469 | 0.315 | 6.79E-142 | ductal | SYPL1         |
| TMEM2.1   | 6.22E-146 | -0.705502468 | 0.244 | 0.412 | 1.50E-141 | ductal | TMEM2         |
| PIGR.1    | 9.70E-146 | 0.798067409  | 0.345 | 0.193 | 2.34E-141 | ductal | PIGR          |

|            |           |              |       |       |           |        |          |
|------------|-----------|--------------|-------|-------|-----------|--------|----------|
| HSP90AA1.  | 1.69E-144 | 0.428916187  | 0.898 | 0.829 | 4.07E-140 | ductal | HSP90AA1 |
| PVRL2.1    | 6.34E-144 | -0.594161244 | 0.185 | 0.346 | 1.53E-139 | ductal | PVRL2    |
| SNRPB2.1   | 7.90E-144 | 0.536304124  | 0.441 | 0.288 | 1.90E-139 | ductal | SNRPB2   |
| SRRM1.1    | 1.61E-143 | 0.508936276  | 0.629 | 0.483 | 3.89E-139 | ductal | SRRM1    |
| GLRX.1     | 2.14E-143 | 0.720974518  | 0.384 | 0.232 | 5.15E-139 | ductal | GLRX     |
| MORF4L1.1  | 4.26E-143 | 0.4640838    | 0.703 | 0.589 | 1.03E-138 | ductal | MORF4L1  |
| MDH1.1     | 5.42E-143 | 0.551516358  | 0.372 | 0.22  | 1.31E-138 | ductal | MDH1     |
| TJP1.1     | 5.77E-143 | -0.594108106 | 0.407 | 0.57  | 1.39E-138 | ductal | TJP1     |
| TPK1.1     | 6.84E-143 | 0.546156919  | 0.297 | 0.157 | 1.65E-138 | ductal | TPK1     |
| CFLAR.1    | 1.22E-142 | 0.760128352  | 0.43  | 0.289 | 2.95E-138 | ductal | CFLAR    |
| ITGA2.1    | 1.44E-141 | 0.787615698  | 0.483 | 0.335 | 3.48E-137 | ductal | ITGA2    |
| UGDH.1     | 1.95E-141 | -0.67422724  | 0.144 | 0.295 | 4.71E-137 | ductal | UGDH     |
| SHROOM3.   | 4.02E-141 | -0.455570914 | 0.531 | 0.693 | 9.68E-137 | ductal | SHROOM3  |
| AIMP1.1    | 4.83E-140 | 0.579739894  | 0.397 | 0.247 | 1.16E-135 | ductal | AIMP1    |
| ERBB2IP.1  | 2.34E-139 | -0.638782125 | 0.329 | 0.49  | 5.64E-135 | ductal | ERBB2IP  |
| TCF12.1    | 6.08E-139 | -0.464128449 | 0.493 | 0.656 | 1.47E-134 | ductal | TCF12    |
| RPS24.1    | 4.56E-138 | 0.264749132  | 0.98  | 0.958 | 1.10E-133 | ductal | RPS24    |
| ZNF644.1   | 3.58E-137 | -0.620950011 | 0.371 | 0.533 | 8.62E-133 | ductal | ZNF644   |
| JUP.1      | 7.12E-137 | -0.505519355 | 0.17  | 0.325 | 1.72E-132 | ductal | JUP      |
| PAWR.1     | 1.70E-136 | -0.552275913 | 0.45  | 0.611 | 4.10E-132 | ductal | PAWR     |
| SARNP.1    | 4.17E-136 | 0.521306309  | 0.285 | 0.149 | 1.00E-131 | ductal | SARNP    |
| NR6A1.1    | 6.70E-136 | -0.722521824 | 0.253 | 0.413 | 1.61E-131 | ductal | NR6A1    |
| SVIL.1     | 3.67E-135 | 0.555515178  | 0.669 | 0.536 | 8.85E-131 | ductal | SVIL     |
| HIPK2.1    | 5.11E-135 | -0.507886587 | 0.273 | 0.436 | 1.23E-130 | ductal | HIPK2    |
| RPL36AL.1  | 6.20E-135 | 0.339714751  | 0.917 | 0.869 | 1.50E-130 | ductal | RPL36AL  |
| INPP4B.1   | 1.12E-134 | -0.574756628 | 0.224 | 0.395 | 2.69E-130 | ductal | INPP4B   |
| ZBTB10.1   | 4.89E-134 | -0.563426585 | 0.164 | 0.315 | 1.18E-129 | ductal | ZBTB10   |
| USMG5.1    | 2.45E-133 | 0.388347795  | 0.718 | 0.577 | 5.91E-129 | ductal | USMG5    |
| SYTL2.1    | 4.96E-133 | -0.494628622 | 0.337 | 0.523 | 1.20E-128 | ductal | SYTL2    |
| TULP4.1    | 5.88E-133 | -0.496578411 | 0.399 | 0.564 | 1.42E-128 | ductal | TULP4    |
| GADD45A.1  | 2.88E-132 | -0.591891956 | 0.173 | 0.325 | 6.95E-128 | ductal | GADD45A  |
| TM4SF1.1   | 3.02E-132 | 0.820894879  | 0.917 | 0.901 | 7.27E-128 | ductal | TM4SF1   |
| DRAM1.1    | 1.10E-131 | -0.573174817 | 0.201 | 0.356 | 2.65E-127 | ductal | DRAM1    |
| MT-CYB.1   | 2.91E-131 | -0.250290392 | 0.988 | 0.993 | 7.02E-127 | ductal | MT-CYB   |
| TBL1XR1.1  | 1.27E-130 | -0.63412192  | 0.499 | 0.633 | 3.07E-126 | ductal | TBL1XR1  |
| LARP1B.1   | 6.62E-129 | -0.596218661 | 0.132 | 0.271 | 1.60E-124 | ductal | LARP1B   |
| DYNLL1.1   | 3.97E-128 | -0.51672953  | 0.154 | 0.301 | 9.57E-124 | ductal | DYNLL1   |
| MYL6.1     | 6.18E-128 | 0.43021124   | 0.95  | 0.925 | 1.49E-123 | ductal | MYL6     |
| BCAR3.1    | 1.29E-126 | -0.670881335 | 0.191 | 0.335 | 3.11E-122 | ductal | BCAR3    |
| SERPINA3.1 | 3.28E-126 | 0.719029256  | 0.35  | 0.216 | 7.90E-122 | ductal | SERPINA3 |
| BRK1.1     | 5.18E-126 | 0.43935      | 0.683 | 0.563 | 1.25E-121 | ductal | BRK1     |
| ATP5G2.1   | 8.93E-126 | -0.551158505 | 0.691 | 0.767 | 2.15E-121 | ductal | ATP5G2   |
| MBNL2.1    | 1.59E-125 | -0.492649112 | 0.446 | 0.603 | 3.84E-121 | ductal | MBNL2    |
| RPL13.1    | 2.89E-125 | -0.47869586  | 0.316 | 0.482 | 6.97E-121 | ductal | RPL13    |
| TOM1L2.1   | 3.21E-125 | -0.552212901 | 0.209 | 0.358 | 7.74E-121 | ductal | TOM1L2   |
| RERE.1     | 4.49E-125 | -0.481728123 | 0.478 | 0.628 | 1.08E-120 | ductal | RERE     |
| DDX24.1    | 1.23E-123 | 0.530661633  | 0.586 | 0.46  | 2.96E-119 | ductal | DDX24    |

|            |           |              |       |       |           |        |             |
|------------|-----------|--------------|-------|-------|-----------|--------|-------------|
| FRMD4A.1   | 1.68E-123 | 0.691605137  | 0.365 | 0.226 | 4.05E-119 | ductal | FRMD4A      |
| RPL13A.1   | 3.21E-123 | -0.341798005 | 0.369 | 0.546 | 7.74E-119 | ductal | RPL13A      |
| RPL36.1    | 8.14E-123 | -0.43168049  | 0.112 | 0.254 | 1.96E-118 | ductal | RPL36       |
| ELF3.1     | 1.76E-122 | -0.452200548 | 0.415 | 0.574 | 4.25E-118 | ductal | ELF3        |
| WTAP.1     | 1.93E-121 | 0.766635443  | 0.592 | 0.469 | 4.64E-117 | ductal | WTAP        |
| TNFAIP8.1  | 7.17E-120 | 0.624425884  | 0.476 | 0.334 | 1.73E-115 | ductal | TNFAIP8     |
| DLGAP1.1   | 2.04E-118 | -0.65102927  | 0.123 | 0.255 | 4.92E-114 | ductal | DLGAP1      |
| CCNI.1     | 2.97E-118 | -0.376346244 | 0.536 | 0.684 | 7.15E-114 | ductal | CCNI        |
| NEDD9.1    | 5.73E-118 | -0.476799396 | 0.274 | 0.433 | 1.38E-113 | ductal | NEDD9       |
| GOLM1.1    | 3.39E-117 | -0.515295912 | 0.15  | 0.287 | 8.17E-113 | ductal | GOLM1       |
| CCL28.1    | 5.25E-116 | 0.535635641  | 0.464 | 0.308 | 1.27E-111 | ductal | CCL28       |
| C8orf37-AS | 7.76E-116 | 0.455944106  | 0.332 | 0.196 | 1.87E-111 | ductal | C8orf37-AS1 |
| NUB1.1     | 1.54E-115 | 0.669692942  | 0.269 | 0.148 | 3.71E-111 | ductal | NUB1        |
| PCBP2.1    | 2.40E-115 | -0.396421323 | 0.478 | 0.628 | 5.79E-111 | ductal | PCBP2       |
| FUT8.1     | 2.82E-115 | -0.614195043 | 0.175 | 0.314 | 6.80E-111 | ductal | FUT8        |
| IGF2BP2.1  | 4.09E-115 | 0.678612181  | 0.355 | 0.223 | 9.87E-111 | ductal | IGF2BP2     |
| UQCR10.1   | 1.14E-114 | -0.486704002 | 0.417 | 0.564 | 2.76E-110 | ductal | UQCR10      |
| BCL2.1     | 1.20E-114 | -0.752650286 | 0.189 | 0.326 | 2.90E-110 | ductal | BCL2        |
| APLP2.1    | 2.11E-114 | -0.488435287 | 0.192 | 0.332 | 5.08E-110 | ductal | APLP2       |
| SEPT7.1    | 3.16E-114 | 0.479972235  | 0.461 | 0.324 | 7.62E-110 | ductal | 7-Sep       |
| OPHN1.1    | 5.42E-114 | -0.615259305 | 0.238 | 0.385 | 1.31E-109 | ductal | OPHN1       |
| PAN3.1     | 7.51E-114 | -0.448872024 | 0.552 | 0.691 | 1.81E-109 | ductal | PAN3        |
| CHCHD3.1   | 2.19E-113 | -0.424683539 | 0.807 | 0.855 | 5.28E-109 | ductal | CHCHD3      |
| TCEANC2.1  | 2.38E-113 | 0.474153791  | 0.324 | 0.191 | 5.75E-109 | ductal | TCEANC2     |
| RAPH1.1    | 6.09E-113 | -0.588253214 | 0.25  | 0.391 | 1.47E-108 | ductal | RAPH1       |
| ARHGEF12   | 1.14E-112 | -0.409701619 | 0.481 | 0.637 | 2.76E-108 | ductal | ARHGEF12    |
| THRB.1     | 2.48E-111 | -0.632787913 | 0.377 | 0.513 | 5.99E-107 | ductal | THRB        |
| COX7A2.1   | 3.31E-111 | 0.359896281  | 0.81  | 0.736 | 7.98E-107 | ductal | COX7A2      |
| PDCD10.1   | 6.96E-111 | 0.485007289  | 0.334 | 0.205 | 1.68E-106 | ductal | PDCD10      |
| PCBP1.1    | 2.69E-110 | -0.405904835 | 0.411 | 0.563 | 6.48E-106 | ductal | PCBP1       |
| MT-ND3.1   | 5.06E-110 | -0.363454835 | 0.978 | 0.993 | 1.22E-105 | ductal | MT-ND3      |
| TMEM258    | 1.28E-109 | 0.388372324  | 0.667 | 0.56  | 3.09E-105 | ductal | TMEM258     |
| CCT5.1     | 2.48E-109 | 0.545364241  | 0.377 | 0.249 | 5.98E-105 | ductal | CCT5        |
| EIF3E.1    | 5.84E-109 | 0.336318686  | 0.675 | 0.517 | 1.41E-104 | ductal | EIF3E       |
| DAD1.1     | 2.53E-108 | 0.438874664  | 0.574 | 0.452 | 6.10E-104 | ductal | DAD1        |
| NFKBIZ.1   | 3.46E-108 | 0.567429197  | 0.626 | 0.521 | 8.35E-104 | ductal | NFKBIZ      |
| CLDN1.1    | 8.19E-108 | 0.86016884   | 0.304 | 0.184 | 1.98E-103 | ductal | CLDN1       |
| RORA.1     | 4.86E-107 | -0.629302975 | 0.494 | 0.622 | 1.17E-102 | ductal | RORA        |
| ILF2.1     | 5.15E-107 | 0.516245772  | 0.512 | 0.383 | 1.24E-102 | ductal | ILF2        |
| NEDD4L.1   | 5.29E-107 | -0.534585889 | 0.514 | 0.651 | 1.27E-102 | ductal | NEDD4L      |
| PSMC2.1    | 4.61E-106 | 0.408126065  | 0.299 | 0.173 | 1.11E-101 | ductal | PSMC2       |
| MAGI3.1    | 5.35E-106 | -0.494083714 | 0.294 | 0.439 | 1.29E-101 | ductal | MAGI3       |
| VPS29.1    | 1.19E-105 | 0.479581926  | 0.403 | 0.273 | 2.86E-101 | ductal | VPS29       |
| WFDC2.1    | 8.07E-104 | 1.256736964  | 0.407 | 0.277 | 1.95E-99  | ductal | WFDC2       |
| IK.1       | 1.37E-102 | 0.403866628  | 0.261 | 0.143 | 3.31E-98  | ductal | IK          |
| UBB.1      | 6.19E-102 | 0.313924224  | 0.784 | 0.685 | 1.49E-97  | ductal | UBB         |
| RPL29.1    | 2.18E-101 | -0.450430826 | 0.152 | 0.288 | 5.26E-97  | ductal | RPL29       |



|            |           |              |       |       |                 |           |
|------------|-----------|--------------|-------|-------|-----------------|-----------|
| KTN1.1     | 6.26E-101 | -0.45900334  | 0.461 | 0.593 | 1.51E-96 ductal | KTN1      |
| RARRES3.1  | 2.16E-100 | 0.551553656  | 0.294 | 0.176 | 5.22E-96 ductal | RARRES3   |
| KIAA1522.1 | 2.52E-100 | -0.404204919 | 0.15  | 0.279 | 6.08E-96 ductal | KIAA1522  |
| TAOK3.1    | 6.55E-100 | -0.453811172 | 0.389 | 0.527 | 1.58E-95 ductal | TAOK3     |
| GSPT1.1    | 8.14E-100 | -0.471803867 | 0.286 | 0.421 | 1.96E-95 ductal | GSPT1     |
| TANK.1     | 1.43E-99  | 0.469647042  | 0.552 | 0.429 | 3.45E-95 ductal | TANK      |
| HIST1H2AC  | 2.27E-99  | -0.404669815 | 0.274 | 0.422 | 5.47E-95 ductal | HIST1H2AC |
| RANBP9.1   | 2.45E-99  | -0.445225884 | 0.217 | 0.35  | 5.91E-95 ductal | RANBP9    |
| BCL6.1     | 2.47E-99  | -0.475456504 | 0.272 | 0.412 | 5.96E-95 ductal | BCL6      |
| GBP2.1     | 7.89E-99  | 0.521539881  | 0.679 | 0.578 | 1.90E-94 ductal | GBP2      |
| DEFB1.1    | 3.33E-98  | 0.324502309  | 0.538 | 0.382 | 8.03E-94 ductal | DEFB1     |
| MYH9.1     | 3.38E-98  | -0.429572375 | 0.425 | 0.571 | 8.16E-94 ductal | MYH9      |
| FLNB.1     | 4.39E-98  | -0.441549362 | 0.365 | 0.515 | 1.06E-93 ductal | FLNB      |
| EGFR.1     | 1.29E-97  | 0.501522331  | 0.25  | 0.138 | 3.12E-93 ductal | EGFR      |
| PRLR.1     | 1.56E-97  | -0.50541528  | 0.16  | 0.285 | 3.75E-93 ductal | PRLR      |
| DGKH.1     | 6.04E-97  | -0.535177422 | 0.228 | 0.359 | 1.46E-92 ductal | DGKH      |
| OOEP.1     | 1.05E-96  | 0.26003172   | 0.978 | 0.958 | 2.53E-92 ductal | OOEP      |
| C4orf3.1   | 1.21E-96  | 0.422379174  | 0.61  | 0.493 | 2.91E-92 ductal | C4orf3    |
| SLIRP.1    | 2.50E-96  | 0.386596175  | 0.394 | 0.261 | 6.03E-92 ductal | SLIRP     |
| COL4A5.1   | 5.63E-96  | -0.476551275 | 0.145 | 0.267 | 1.36E-91 ductal | COL4A5    |
| KCTD9.1    | 5.71E-96  | 0.569250056  | 0.306 | 0.192 | 1.38E-91 ductal | KCTD9     |
| SSBP1.1    | 7.12E-96  | 0.491813825  | 0.436 | 0.317 | 1.72E-91 ductal | SSBP1     |
| UBL5.1     | 1.12E-95  | -0.527060584 | 0.439 | 0.554 | 2.71E-91 ductal | UBL5      |
| LRBA.1     | 1.72E-95  | -0.419550399 | 0.559 | 0.689 | 4.15E-91 ductal | LRBA      |
| PKP4.1     | 2.02E-95  | -0.447764536 | 0.419 | 0.555 | 4.87E-91 ductal | PKP4      |
| FARP1.1    | 2.55E-95  | -0.44578121  | 0.294 | 0.434 | 6.16E-91 ductal | FARP1     |
| AGR2.1     | 2.57E-95  | -0.30205311  | 0.161 | 0.296 | 6.20E-91 ductal | AGR2      |
| CDCP1.1    | 3.00E-95  | 0.480003646  | 0.355 | 0.234 | 7.24E-91 ductal | CDCP1     |
| SSBP2.1    | 1.39E-94  | -0.548998443 | 0.358 | 0.486 | 3.36E-90 ductal | SSBP2     |
| ENAH.1     | 1.94E-94  | -0.382229916 | 0.467 | 0.606 | 4.67E-90 ductal | ENAH      |
| ATP8B1.1   | 2.53E-94  | -0.563727092 | 0.325 | 0.454 | 6.10E-90 ductal | ATP8B1    |
| ACTB.1     | 1.36E-93  | -0.504181829 | 0.566 | 0.691 | 3.29E-89 ductal | ACTB      |
| NCOA7.1    | 1.69E-93  | 0.528021603  | 0.523 | 0.392 | 4.07E-89 ductal | NCOA7     |
| TAX1BP1.1  | 7.84E-93  | 0.387708739  | 0.683 | 0.591 | 1.89E-88 ductal | TAX1BP1   |
| KLHL5.1    | 1.35E-92  | -0.49024559  | 0.21  | 0.333 | 3.26E-88 ductal | KLHL5     |
| INO80D.1   | 1.47E-92  | 0.433569653  | 0.643 | 0.525 | 3.55E-88 ductal | INO80D    |
| INTS6.1    | 2.42E-92  | -0.482099005 | 0.205 | 0.331 | 5.83E-88 ductal | INTS6     |
| RBM8A.1    | 2.64E-92  | 0.451991592  | 0.504 | 0.388 | 6.37E-88 ductal | RBM8A     |
| UGP2.1     | 1.13E-91  | 0.445413039  | 0.51  | 0.393 | 2.72E-87 ductal | UGP2      |
| RASEF.1    | 1.14E-91  | -0.443556131 | 0.195 | 0.322 | 2.74E-87 ductal | RASEF     |
| RNF145.1   | 2.85E-91  | 0.510498639  | 0.416 | 0.293 | 6.88E-87 ductal | RNF145    |
| ERH.1      | 1.18E-90  | 0.431215201  | 0.572 | 0.467 | 2.83E-86 ductal | ERH       |
| MTHFD2L.1  | 3.89E-90  | 0.686735803  | 0.476 | 0.359 | 9.38E-86 ductal | MTHFD2L   |
| KAZN.1     | 7.31E-90  | -0.478279517 | 0.146 | 0.263 | 1.76E-85 ductal | KAZN      |
| GAB1.1     | 1.03E-89  | -0.405442753 | 0.302 | 0.437 | 2.48E-85 ductal | GAB1      |
| CUX1.1     | 1.40E-89  | -0.453569364 | 0.271 | 0.399 | 3.38E-85 ductal | CUX1      |
| CD24.1     | 1.60E-89  | -0.490042078 | 0.502 | 0.628 | 3.87E-85 ductal | CD24      |

|                   |          |              |       |       |                 |               |
|-------------------|----------|--------------|-------|-------|-----------------|---------------|
| REEP5.1           | 3.74E-89 | -0.419704702 | 0.179 | 0.3   | 9.03E-85 ductal | REEP5         |
| C16orf45.1        | 1.21E-88 | -0.490665897 | 0.157 | 0.274 | 2.91E-84 ductal | C16orf45      |
| LDHA.1            | 1.48E-88 | 0.40430431   | 0.732 | 0.631 | 3.57E-84 ductal | LDHA          |
| NAALADL2.         | 2.03E-88 | -0.519389727 | 0.428 | 0.55  | 4.90E-84 ductal | NAALADL2      |
| LPP.1             | 2.62E-88 | -0.283221099 | 0.886 | 0.933 | 6.33E-84 ductal | LPP           |
| ATP6V0E1.         | 4.02E-88 | -0.336563524 | 0.628 | 0.734 | 9.69E-84 ductal | ATP6V0E1      |
| UBN2.1            | 9.17E-88 | -0.422434202 | 0.197 | 0.323 | 2.21E-83 ductal | UBN2          |
| WWC1.1            | 3.70E-87 | -0.425853786 | 0.337 | 0.47  | 8.91E-83 ductal | WWC1          |
| GNB1.1            | 5.04E-87 | -0.376568774 | 0.266 | 0.395 | 1.22E-82 ductal | GNB1          |
| RPLP2.1           | 9.97E-87 | -0.272581828 | 0.149 | 0.273 | 2.40E-82 ductal | RPLP2         |
| RPS16.1           | 1.19E-86 | -0.269740605 | 0.225 | 0.361 | 2.87E-82 ductal | RPS16         |
| OSBPL3.1          | 1.76E-86 | -0.430694264 | 0.159 | 0.277 | 4.25E-82 ductal | OSBPL3        |
| DDX18.1           | 2.43E-86 | 0.452548244  | 0.362 | 0.247 | 5.86E-82 ductal | DDX18         |
| BTRC.1            | 2.85E-86 | -0.418013619 | 0.188 | 0.311 | 6.87E-82 ductal | BTRC          |
| DCTN6.1           | 6.92E-86 | 0.410005218  | 0.353 | 0.236 | 1.67E-81 ductal | DCTN6         |
| MTRNR2L1          | 1.45E-85 | 0.445570476  | 0.296 | 0.182 | 3.49E-81 ductal | MTRNR2L12     |
| ATP6V1D.1         | 5.48E-85 | 0.447507412  | 0.348 | 0.234 | 1.32E-80 ductal | ATP6V1D       |
| NOS1AP.1          | 7.35E-85 | -0.392018069 | 0.146 | 0.262 | 1.77E-80 ductal | NOS1AP        |
| ARIH1.1           | 7.94E-85 | -0.358342719 | 0.428 | 0.558 | 1.91E-80 ductal | ARIH1         |
| CADPS2.1          | 2.76E-84 | -0.812529508 | 0.33  | 0.45  | 6.65E-80 ductal | CADPS2        |
| ACSL3.1           | 5.42E-84 | -0.502507057 | 0.259 | 0.385 | 1.31E-79 ductal | ACSL3         |
| DLG5.1            | 1.56E-83 | -0.507795065 | 0.191 | 0.308 | 3.77E-79 ductal | DLG5          |
| PSMB5.1           | 1.88E-83 | -0.342252129 | 0.168 | 0.286 | 4.53E-79 ductal | PSMB5         |
| DNAJB6.1          | 2.07E-83 | -0.410855487 | 0.304 | 0.432 | 5.00E-79 ductal | DNAJB6        |
| ARF4.1            | 3.74E-83 | 0.381664297  | 0.675 | 0.587 | 9.03E-79 ductal | ARF4          |
| CDH1.1            | 6.26E-83 | -0.381034973 | 0.533 | 0.651 | 1.51E-78 ductal | CDH1          |
| STOM.1            | 1.00E-82 | -0.483360414 | 0.191 | 0.307 | 2.42E-78 ductal | STOM          |
| CDK13.1           | 1.37E-82 | -0.469812038 | 0.348 | 0.472 | 3.31E-78 ductal | CDK13         |
| ESD.1             | 1.40E-82 | 0.409925162  | 0.39  | 0.271 | 3.37E-78 ductal | ESD           |
| EIF3H.1           | 2.27E-82 | -0.356386075 | 0.566 | 0.662 | 5.47E-78 ductal | EIF3H         |
| PROM1.1           | 4.06E-82 | 0.482184222  | 0.298 | 0.187 | 9.79E-78 ductal | PROM1         |
| FNBP1.1           | 9.27E-82 | -0.358976005 | 0.443 | 0.579 | 2.24E-77 ductal | FNBP1         |
| ZNF292.1          | 1.22E-81 | 0.380201177  | 0.631 | 0.526 | 2.94E-77 ductal | ZNF292        |
| MAP4.1            | 1.45E-81 | -0.382585727 | 0.402 | 0.53  | 3.51E-77 ductal | MAP4          |
| MSI2.1            | 1.88E-81 | -0.421525241 | 0.268 | 0.391 | 4.54E-77 ductal | MSI2          |
| BARX2.1           | 3.33E-81 | 0.576248021  | 0.318 | 0.212 | 8.03E-77 ductal | BARX2         |
| SLC38A2.1         | 4.41E-81 | -0.448864111 | 0.302 | 0.432 | 1.06E-76 ductal | SLC38A2       |
| SLC4A7.1          | 4.57E-81 | 0.460169691  | 0.353 | 0.239 | 1.10E-76 ductal | SLC4A7        |
| FEZ2.1            | 5.04E-81 | 0.524341362  | 0.409 | 0.301 | 1.22E-76 ductal | FEZ2          |
| HERC4.1           | 6.71E-81 | -0.4540561   | 0.454 | 0.574 | 1.62E-76 ductal | HERC4         |
| GSK3B.1           | 8.18E-81 | -0.404604487 | 0.322 | 0.448 | 1.97E-76 ductal | GSK3B         |
| SLCO3A1.1         | 1.91E-80 | 0.456573255  | 0.25  | 0.148 | 4.60E-76 ductal | SLCO3A1       |
| SPRED2.1          | 6.08E-80 | -0.403690653 | 0.145 | 0.255 | 1.47E-75 ductal | SPRED2        |
| RUFY3.1           | 6.68E-80 | -0.359411244 | 0.168 | 0.284 | 1.61E-75 ductal | RUFY3         |
| ZCCHC17.1         | 7.01E-80 | 0.442164769  | 0.327 | 0.219 | 1.69E-75 ductal | ZCCHC17       |
| ZFAND3.1          | 1.14E-79 | -0.379621661 | 0.714 | 0.79  | 2.76E-75 ductal | ZFAND3        |
| C1QTNF3- <i>A</i> | 3.19E-79 | -0.470015208 | 0.244 | 0.366 | 7.70E-75 ductal | C1QTNF3-AMACR |

|            |          |              |       |       |                 |              |
|------------|----------|--------------|-------|-------|-----------------|--------------|
| EIF2S1.1   | 3.21E-79 | 0.410920679  | 0.264 | 0.162 | 7.74E-75 ductal | EIF2S1       |
| UBE2V2.1   | 7.87E-79 | 0.396879293  | 0.319 | 0.211 | 1.90E-74 ductal | UBE2V2       |
| AC072062.  | 1.10E-78 | -0.377281525 | 0.391 | 0.523 | 2.66E-74 ductal | AC072062.1   |
| PPP6R3.1   | 2.58E-78 | -0.37005294  | 0.434 | 0.555 | 6.22E-74 ductal | PPP6R3       |
| MKL1.1     | 6.95E-78 | -0.355053666 | 0.417 | 0.546 | 1.68E-73 ductal | MKL1         |
| DYNLT1.1   | 8.66E-78 | 0.42050235   | 0.644 | 0.567 | 2.09E-73 ductal | DYNLT1       |
| DLEU2.1    | 1.56E-77 | -0.402673056 | 0.155 | 0.264 | 3.75E-73 ductal | DLEU2        |
| SRSF3.1    | 3.37E-77 | 0.565243137  | 0.496 | 0.396 | 8.13E-73 ductal | SRSF3        |
| TTL5.1     | 4.53E-77 | -0.43249548  | 0.212 | 0.328 | 1.09E-72 ductal | TTL5         |
| TSC22D2.1  | 5.79E-77 | -0.356861176 | 0.386 | 0.518 | 1.40E-72 ductal | TSC22D2      |
| SH3BGRL.1  | 4.25E-76 | -0.447215606 | 0.329 | 0.448 | 1.02E-71 ductal | SH3BGRL      |
| FOXP1.1    | 6.62E-76 | -0.424250935 | 0.574 | 0.673 | 1.60E-71 ductal | FOXP1        |
| CTNND1.1   | 9.54E-76 | -0.345144908 | 0.319 | 0.444 | 2.30E-71 ductal | CTNND1       |
| MAST4.1    | 1.00E-75 | -0.434557449 | 0.454 | 0.575 | 2.42E-71 ductal | MAST4        |
| RBM47.1    | 1.29E-75 | -0.349722532 | 0.566 | 0.681 | 3.11E-71 ductal | RBM47        |
| TBL1X.1    | 2.32E-75 | -0.340851443 | 0.149 | 0.259 | 5.60E-71 ductal | TBL1X        |
| SUSD6.1    | 3.32E-75 | -0.386732495 | 0.208 | 0.324 | 8.01E-71 ductal | SUSD6        |
| RP1-292B1  | 6.50E-75 | -0.301038952 | 0.146 | 0.257 | 1.57E-70 ductal | RP1-292B18.4 |
| YTHDC1.1   | 8.49E-75 | -0.37700193  | 0.309 | 0.432 | 2.05E-70 ductal | YTHDC1       |
| ANKRD11.1  | 9.31E-75 | -0.33368852  | 0.246 | 0.368 | 2.24E-70 ductal | ANKRD11      |
| EIF4A1.1   | 1.36E-73 | 0.428739541  | 0.472 | 0.364 | 3.27E-69 ductal | EIF4A1       |
| NHSL2.1    | 1.57E-73 | 0.378770636  | 0.349 | 0.24  | 3.80E-69 ductal | NHSL2        |
| COX7B.1    | 9.38E-73 | 0.336622942  | 0.682 | 0.605 | 2.26E-68 ductal | COX7B        |
| DUSP10.1   | 1.28E-72 | -0.400883575 | 0.16  | 0.265 | 3.09E-68 ductal | DUSP10       |
| PRRG4.1    | 2.48E-72 | -0.363336491 | 0.195 | 0.308 | 5.99E-68 ductal | PRRG4        |
| ATP6V1G1.  | 2.70E-72 | -0.328154719 | 0.315 | 0.437 | 6.50E-68 ductal | ATP6V1G1     |
| ADAM32.1   | 1.00E-71 | -0.424609956 | 0.164 | 0.272 | 2.42E-67 ductal | ADAM32       |
| EIF3K.1    | 1.21E-71 | -0.550467978 | 0.274 | 0.367 | 2.92E-67 ductal | EIF3K        |
| GPBP1.1    | 3.55E-71 | -0.392882748 | 0.635 | 0.722 | 8.56E-67 ductal | GPBP1        |
| KAT6B.1    | 5.29E-71 | -0.37503208  | 0.189 | 0.3   | 1.28E-66 ductal | KAT6B        |
| CTC-471J1. | 7.00E-71 | 0.67169315   | 0.658 | 0.624 | 1.69E-66 ductal | CTC-471J1.9  |
| ARPC3.1    | 7.82E-71 | 0.360661854  | 0.7   | 0.64  | 1.89E-66 ductal | ARPC3        |
| ARFGEF2.1  | 1.20E-70 | -0.364197836 | 0.299 | 0.419 | 2.90E-66 ductal | ARFGEF2      |
| OSBPL8.1   | 2.18E-70 | -0.376032448 | 0.174 | 0.281 | 5.26E-66 ductal | OSBPL8       |
| KLHL24.1   | 2.24E-70 | -0.316633558 | 0.276 | 0.398 | 5.39E-66 ductal | KLHL24       |
| ATF4.1     | 3.34E-70 | -0.351201588 | 0.323 | 0.442 | 8.05E-66 ductal | ATF4         |
| CNOT4.1    | 9.94E-70 | -0.329247608 | 0.325 | 0.447 | 2.40E-65 ductal | CNOT4        |
| CREBBP.1   | 2.05E-69 | -0.330113735 | 0.23  | 0.345 | 4.95E-65 ductal | CREBBP       |
| CDC42BPA.  | 3.63E-69 | -0.377587903 | 0.31  | 0.428 | 8.75E-65 ductal | CDC42BPA     |
| KCMF1.1    | 4.18E-69 | -0.348701844 | 0.265 | 0.383 | 1.01E-64 ductal | KCMF1        |
| HNRNPM.1   | 8.59E-69 | -0.332364696 | 0.195 | 0.305 | 2.07E-64 ductal | HNRNPM       |
| YAP1.1     | 1.09E-68 | -0.337252193 | 0.462 | 0.579 | 2.63E-64 ductal | YAP1         |
| RTCB.1     | 1.74E-68 | 0.386129845  | 0.474 | 0.371 | 4.20E-64 ductal | RTCB         |
| UFM1.1     | 2.73E-68 | 0.384581761  | 0.391 | 0.287 | 6.59E-64 ductal | UFM1         |
| ITGB8.1    | 3.82E-68 | 0.440922639  | 0.559 | 0.461 | 9.20E-64 ductal | ITGB8        |
| ZFAS1.1    | 4.18E-68 | 0.267848021  | 0.951 | 0.915 | 1.01E-63 ductal | ZFAS1        |
| SMARCC1.1  | 6.15E-68 | -0.335814414 | 0.222 | 0.334 | 1.48E-63 ductal | SMARCC1      |

|           |          |              |       |       |                 |              |
|-----------|----------|--------------|-------|-------|-----------------|--------------|
| RP5-857K2 | 6.73E-68 | -0.328233908 | 0.359 | 0.481 | 1.62E-63 ductal | RP5-857K21.4 |
| RPL41.1   | 8.17E-68 | 0.679637482  | 0.938 | 0.882 | 1.97E-63 ductal | RPL41        |
| BACE2.1   | 1.25E-67 | 0.43387141   | 0.377 | 0.275 | 3.03E-63 ductal | BACE2        |
| CFL1.1    | 1.42E-67 | -0.411913007 | 0.251 | 0.359 | 3.42E-63 ductal | CFL1         |
| EEF2.1    | 3.38E-67 | -0.41170816  | 0.333 | 0.458 | 8.15E-63 ductal | EEF2         |
| POLR1D.1  | 3.41E-67 | -0.319631971 | 0.163 | 0.265 | 8.22E-63 ductal | POLR1D       |
| TOP1.1    | 6.79E-67 | -0.333556748 | 0.375 | 0.491 | 1.64E-62 ductal | TOP1         |
| DPM1.1    | 7.65E-67 | 0.36594229   | 0.307 | 0.207 | 1.84E-62 ductal | DPM1         |
| TIAM1.1   | 9.15E-67 | 0.549401867  | 0.304 | 0.207 | 2.21E-62 ductal | TIAM1        |
| CD63.1    | 1.28E-66 | -0.394953942 | 0.315 | 0.425 | 3.08E-62 ductal | CD63         |
| UBE2G1.1  | 1.31E-66 | -0.326361973 | 0.191 | 0.299 | 3.17E-62 ductal | UBE2G1       |
| BRD2.1    | 1.94E-66 | -0.338173464 | 0.204 | 0.311 | 4.69E-62 ductal | BRD2         |
| SDC4.1    | 2.14E-66 | 0.612065958  | 0.388 | 0.295 | 5.15E-62 ductal | SDC4         |
| UBR5.1    | 2.45E-66 | -0.322630938 | 0.398 | 0.516 | 5.92E-62 ductal | UBR5         |
| OTUD7B.1  | 2.59E-66 | -0.360230716 | 0.227 | 0.338 | 6.24E-62 ductal | OTUD7B       |
| FGD6.1    | 2.72E-66 | -0.371667258 | 0.276 | 0.388 | 6.55E-62 ductal | FGD6         |
| GBE1.1    | 2.78E-66 | 0.512521194  | 0.424 | 0.322 | 6.69E-62 ductal | GBE1         |
| COX6C.1   | 3.26E-66 | -0.689053859 | 0.754 | 0.769 | 7.87E-62 ductal | COX6C        |
| USP47.1   | 3.64E-66 | -0.366079634 | 0.35  | 0.466 | 8.78E-62 ductal | USP47        |
| WNK1.1    | 4.52E-66 | -0.31773578  | 0.178 | 0.282 | 1.09E-61 ductal | WNK1         |
| SNRPD1.1  | 5.07E-66 | 0.396256697  | 0.35  | 0.249 | 1.22E-61 ductal | SNRPD1       |
| EIF3L.1   | 5.16E-66 | 0.27701116   | 0.662 | 0.547 | 1.25E-61 ductal | EIF3L        |
| KIF13A.1  | 6.49E-66 | -0.437381135 | 0.326 | 0.44  | 1.56E-61 ductal | KIF13A       |
| CNKSR3.1  | 7.26E-66 | 0.693051529  | 0.366 | 0.274 | 1.75E-61 ductal | CNKSR3       |
| TMEM150C  | 2.56E-65 | 0.357798725  | 0.265 | 0.173 | 6.17E-61 ductal | TMEM150C     |
| CCT2.1    | 9.07E-65 | 0.391327021  | 0.366 | 0.267 | 2.19E-60 ductal | CCT2         |
| SLC38A1.1 | 1.28E-64 | -0.348888963 | 0.325 | 0.437 | 3.10E-60 ductal | SLC38A1      |
| PRDX3.1   | 1.71E-64 | -0.345133623 | 0.164 | 0.264 | 4.12E-60 ductal | PRDX3        |
| RPL7.1    | 3.97E-64 | -0.345036864 | 0.946 | 0.835 | 9.57E-60 ductal | RPL7         |
| PDZD8.1   | 5.26E-64 | -0.382455811 | 0.171 | 0.27  | 1.27E-59 ductal | PDZD8        |
| S100A6.1  | 1.22E-63 | -0.828898269 | 0.532 | 0.601 | 2.93E-59 ductal | S100A6       |
| SSR2.1    | 1.59E-63 | 0.285113826  | 0.733 | 0.658 | 3.84E-59 ductal | SSR2         |
| VAV3.1    | 3.74E-63 | -0.390812032 | 0.222 | 0.327 | 9.03E-59 ductal | VAV3         |
| SEP15.1   | 3.81E-63 | 0.370064982  | 0.473 | 0.38  | 9.19E-59 ductal | 15-Sep       |
| RBX1.1    | 4.11E-63 | 0.365587557  | 0.497 | 0.406 | 9.92E-59 ductal | RBX1         |
| SARAF.1   | 1.10E-62 | -0.291143604 | 0.282 | 0.398 | 2.64E-58 ductal | SARAF        |
| ZSWIM6.1  | 1.24E-62 | -0.367812514 | 0.432 | 0.54  | 2.98E-58 ductal | ZSWIM6       |
| ASH1L.1   | 1.94E-62 | -0.3261521   | 0.484 | 0.593 | 4.67E-58 ductal | ASH1L        |
| EIF1.1    | 7.46E-62 | -0.296656839 | 0.408 | 0.526 | 1.80E-57 ductal | EIF1         |
| C8orf59.1 | 1.37E-61 | 0.336580474  | 0.35  | 0.25  | 3.31E-57 ductal | C8orf59      |
| IGF1R.1   | 1.75E-61 | -0.316766544 | 0.433 | 0.548 | 4.22E-57 ductal | IGF1R        |
| KYNU.1    | 2.49E-61 | 0.772374108  | 0.301 | 0.208 | 6.01E-57 ductal | KYNU         |
| HNRNPH2.1 | 2.50E-61 | 0.332533779  | 0.286 | 0.191 | 6.04E-57 ductal | HNRNPH2      |
| SLC12A2.1 | 2.58E-61 | 0.590868554  | 0.466 | 0.377 | 6.23E-57 ductal | SLC12A2      |
| SEMA6A.1  | 2.60E-61 | 0.570973372  | 0.28  | 0.19  | 6.27E-57 ductal | SEMA6A       |
| ZRANB2.1  | 2.91E-61 | 0.359761058  | 0.291 | 0.198 | 7.02E-57 ductal | ZRANB2       |
| ELF2.1    | 3.10E-61 | -0.353852976 | 0.322 | 0.431 | 7.48E-57 ductal | ELF2         |

|            |          |              |       |       |                 |            |
|------------|----------|--------------|-------|-------|-----------------|------------|
| EP300.1    | 3.18E-61 | -0.321342561 | 0.161 | 0.258 | 7.68E-57 ductal | EP300      |
| PAM.1      | 5.20E-61 | 0.376534008  | 0.527 | 0.433 | 1.25E-56 ductal | PAM        |
| AHNAK.1    | 1.30E-60 | -0.333898468 | 0.29  | 0.399 | 3.14E-56 ductal | AHNAK      |
| RUNX1.1    | 1.34E-60 | -0.282112912 | 0.579 | 0.685 | 3.23E-56 ductal | RUNX1      |
| DNAJC8.1   | 2.44E-60 | 0.337943968  | 0.28  | 0.186 | 5.89E-56 ductal | DNAJC8     |
| SRPK1.1    | 2.94E-60 | 0.407612754  | 0.542 | 0.455 | 7.09E-56 ductal | SRPK1      |
| CD164.1    | 4.37E-60 | -0.340335703 | 0.221 | 0.322 | 1.05E-55 ductal | CD164      |
| USP53.1    | 4.83E-60 | 0.61077      | 0.661 | 0.603 | 1.16E-55 ductal | USP53      |
| LRRFIP1.1  | 6.86E-60 | -0.254577817 | 0.559 | 0.675 | 1.65E-55 ductal | LRRFIP1    |
| CRY1.1     | 8.29E-60 | -0.384597211 | 0.319 | 0.428 | 2.00E-55 ductal | CRY1       |
| RBBP6.1    | 1.51E-59 | -0.307506286 | 0.217 | 0.322 | 3.63E-55 ductal | RBBP6      |
| UBE2K.1    | 1.55E-59 | -0.315285432 | 0.312 | 0.424 | 3.73E-55 ductal | UBE2K      |
| FBXO32.1   | 2.09E-59 | 0.57727673   | 0.428 | 0.336 | 5.04E-55 ductal | FBXO32     |
| ZFAND5.1   | 2.28E-59 | -0.318694219 | 0.367 | 0.477 | 5.50E-55 ductal | ZFAND5     |
| PERP.1     | 2.57E-59 | -0.288542672 | 0.385 | 0.498 | 6.19E-55 ductal | PERP       |
| RARS.1     | 2.58E-59 | 0.339006279  | 0.28  | 0.189 | 6.23E-55 ductal | RARS       |
| C2orf88.1  | 3.29E-59 | 0.396925484  | 0.41  | 0.315 | 7.93E-55 ductal | C2orf88    |
| BCAS3.1    | 3.95E-59 | 0.264959421  | 0.777 | 0.716 | 9.52E-55 ductal | BCAS3      |
| SLTM.1     | 5.57E-59 | -0.303155991 | 0.231 | 0.335 | 1.34E-54 ductal | SLTM       |
| HSPH1.1    | 7.38E-59 | -0.426455969 | 0.223 | 0.324 | 1.78E-54 ductal | HSPH1      |
| SREBF2.1   | 7.91E-59 | -0.31370641  | 0.309 | 0.421 | 1.91E-54 ductal | SREBF2     |
| SNRPG.1    | 9.45E-59 | 0.358911885  | 0.568 | 0.49  | 2.28E-54 ductal | SNRPG      |
| TGIF1.1    | 1.03E-58 | -0.342257951 | 0.163 | 0.256 | 2.48E-54 ductal | TGIF1      |
| ATP5E.1    | 1.49E-58 | -0.457504292 | 0.502 | 0.59  | 3.59E-54 ductal | ATP5E      |
| RNMT.1     | 1.84E-58 | 0.359417608  | 0.393 | 0.293 | 4.43E-54 ductal | RNMT       |
| PTPRE.1    | 3.71E-58 | -0.464966454 | 0.208 | 0.302 | 8.95E-54 ductal | PTPRE      |
| PPP2CB.1   | 3.77E-58 | -0.294101567 | 0.272 | 0.381 | 9.08E-54 ductal | PPP2CB     |
| LIMCH1.1   | 3.87E-58 | -0.415757283 | 0.428 | 0.525 | 9.33E-54 ductal | LIMCH1     |
| MYO1B.1    | 9.41E-58 | -0.405637755 | 0.383 | 0.488 | 2.27E-53 ductal | MYO1B      |
| ATXN2.1    | 1.15E-57 | -0.302182501 | 0.269 | 0.376 | 2.77E-53 ductal | ATXN2      |
| CD46.1     | 1.21E-57 | -0.299237454 | 0.333 | 0.446 | 2.92E-53 ductal | CD46       |
| SMCHD1.1   | 1.67E-57 | -0.375203505 | 0.346 | 0.447 | 4.02E-53 ductal | SMCHD1     |
| MAN1A1.1   | 2.60E-57 | -0.316360125 | 0.17  | 0.265 | 6.28E-53 ductal | MAN1A1     |
| AC018890.1 | 2.69E-57 | -0.319757162 | 0.18  | 0.277 | 6.49E-53 ductal | AC018890.6 |
| GRAMD3.1   | 2.71E-57 | -0.351329783 | 0.282 | 0.389 | 6.54E-53 ductal | GRAMD3     |
| DMD.1      | 3.97E-57 | 0.4739159    | 0.318 | 0.228 | 9.56E-53 ductal | DMD        |
| CD9.1      | 4.09E-57 | -0.371834893 | 0.324 | 0.427 | 9.85E-53 ductal | CD9        |
| TMEM87A.1  | 4.71E-57 | -0.274517159 | 0.317 | 0.428 | 1.14E-52 ductal | TMEM87A    |
| ATP6V1E1.1 | 7.23E-57 | 0.340171141  | 0.353 | 0.26  | 1.74E-52 ductal | ATP6V1E1   |
| ATF3.1     | 1.50E-56 | -0.339961322 | 0.34  | 0.449 | 3.62E-52 ductal | ATF3       |
| CTNNA1.1   | 1.91E-56 | -0.28831696  | 0.475 | 0.578 | 4.59E-52 ductal | CTNNA1     |
| PLCB1.1    | 2.89E-56 | 0.489759923  | 0.28  | 0.192 | 6.98E-52 ductal | PLCB1      |
| DTNB.1     | 3.14E-56 | 0.378518831  | 0.489 | 0.392 | 7.58E-52 ductal | DTNB       |
| KLF6.1     | 3.90E-56 | -0.314009513 | 0.507 | 0.611 | 9.41E-52 ductal | KLF6       |
| SRSF4.1    | 4.20E-56 | -0.277307052 | 0.232 | 0.334 | 1.01E-51 ductal | SRSF4      |
| RB1CC1.1   | 6.14E-56 | -0.305585423 | 0.416 | 0.524 | 1.48E-51 ductal | RB1CC1     |
| CSNK1A1.1  | 7.96E-56 | -0.288447235 | 0.595 | 0.693 | 1.92E-51 ductal | CSNK1A1    |

|           |          |              |       |       |                 |                  |
|-----------|----------|--------------|-------|-------|-----------------|------------------|
| RNF11.1   | 9.05E-56 | -0.290266083 | 0.188 | 0.284 | 2.18E-51 ductal | RNF11            |
| GABARAP.1 | 1.11E-55 | 0.359018421  | 0.424 | 0.327 | 2.68E-51 ductal | GABARAP          |
| ARHGEF28. | 1.34E-55 | 0.492235725  | 0.332 | 0.241 | 3.24E-51 ductal | ARHGEF28         |
| CCT3.1    | 1.75E-55 | -0.298709587 | 0.298 | 0.4   | 4.23E-51 ductal | CCT3             |
| SLC22A23. | 1.79E-55 | -0.308593537 | 0.189 | 0.286 | 4.31E-51 ductal | SLC22A23         |
| BAZ1A.1   | 2.97E-55 | -0.372713575 | 0.322 | 0.424 | 7.17E-51 ductal | BAZ1A            |
| UBE2R2.1  | 3.19E-55 | -0.285745494 | 0.305 | 0.411 | 7.69E-51 ductal | UBE2R2           |
| EIF3I.1   | 3.54E-55 | 0.303688986  | 0.643 | 0.567 | 8.53E-51 ductal | EIF3I            |
| PTPRK.1   | 8.31E-55 | -0.293830099 | 0.735 | 0.794 | 2.00E-50 ductal | PTPRK            |
| CAB39.1   | 9.01E-55 | -0.343557757 | 0.301 | 0.4   | 2.17E-50 ductal | CAB39            |
| LAMC2.1   | 1.18E-54 | 0.369437658  | 0.324 | 0.23  | 2.84E-50 ductal | LAMC2            |
| TMBIM6.1  | 1.23E-54 | 0.328525313  | 0.873 | 0.854 | 2.96E-50 ductal | TMBIM6           |
| RNF144B.1 | 1.72E-54 | 0.489476468  | 0.343 | 0.256 | 4.14E-50 ductal | RNF144B          |
| RAB21.1   | 1.92E-54 | -0.31337929  | 0.203 | 0.301 | 4.62E-50 ductal | RAB21            |
| YY1.1     | 2.15E-54 | -0.274179961 | 0.165 | 0.257 | 5.17E-50 ductal | YY1              |
| POLE2.1   | 2.50E-54 | 0.314658256  | 0.297 | 0.205 | 6.02E-50 ductal | POLE2            |
| MAP2K4.1  | 2.60E-54 | 0.363322234  | 0.498 | 0.412 | 6.27E-50 ductal | MAP2K4           |
| GPBP1L1.1 | 2.72E-54 | -0.292503517 | 0.281 | 0.384 | 6.56E-50 ductal | GPBP1L1          |
| CTTNBP2NL | 3.27E-54 | 0.346776759  | 0.265 | 0.18  | 7.87E-50 ductal | CTTNBP2NL        |
| SCGB2A2.1 | 3.32E-54 | -0.506063487 | 0.21  | 0.314 | 8.02E-50 ductal | SCGB2A2          |
| CLIC6.1   | 4.39E-54 | -0.374053549 | 0.164 | 0.252 | 1.06E-49 ductal | CLIC6            |
| SEMA4B.1  | 5.32E-54 | -0.272551279 | 0.167 | 0.26  | 1.28E-49 ductal | SEMA4B           |
| ITPR2.1   | 6.63E-54 | -0.3540992   | 0.412 | 0.513 | 1.60E-49 ductal | ITPR2            |
| ANO6.1    | 9.35E-54 | -0.342447654 | 0.463 | 0.556 | 2.25E-49 ductal | ANO6             |
| CIR1.1    | 1.33E-53 | 0.327803467  | 0.314 | 0.224 | 3.20E-49 ductal | CIR1             |
| NAV2.1    | 1.74E-53 | 0.44988989   | 0.473 | 0.383 | 4.20E-49 ductal | NAV2             |
| MAN2A1.1  | 5.95E-53 | -0.291929364 | 0.258 | 0.359 | 1.44E-48 ductal | MAN2A1           |
| PDK3.1    | 7.56E-53 | 0.454648192  | 0.282 | 0.198 | 1.82E-48 ductal | PDK3             |
| MAP4K4.1  | 1.02E-52 | 0.429673366  | 0.289 | 0.205 | 2.47E-48 ductal | MAP4K4           |
| TBC1D3P1- | 1.18E-52 | 0.436448065  | 0.638 | 0.56  | 2.85E-48 ductal | TBC1D3P1-DHX40P1 |
| PIP5K1A.1 | 1.31E-52 | -0.294625731 | 0.242 | 0.341 | 3.15E-48 ductal | PIP5K1A          |
| RALGAPA1. | 1.41E-52 | -0.334701928 | 0.247 | 0.342 | 3.39E-48 ductal | RALGAPA1         |
| CXCR4.1   | 2.07E-52 | 0.399549607  | 0.272 | 0.187 | 5.00E-48 ductal | CXCR4            |
| CTBP2.1   | 2.76E-52 | -0.264724044 | 0.28  | 0.386 | 6.65E-48 ductal | CTBP2            |
| RNF10.1   | 3.35E-52 | -0.283929868 | 0.171 | 0.26  | 8.07E-48 ductal | RNF10            |
| ZBTB16.1  | 4.34E-52 | -0.318670367 | 0.216 | 0.314 | 1.05E-47 ductal | ZBTB16           |
| PTPN14.1  | 4.44E-52 | 0.462102745  | 0.356 | 0.271 | 1.07E-47 ductal | PTPN14           |
| YBX3.1    | 5.27E-52 | -0.281849781 | 0.227 | 0.324 | 1.27E-47 ductal | YBX3             |
| CREBRF.1  | 6.71E-52 | -0.272659336 | 0.207 | 0.302 | 1.62E-47 ductal | CREBRF           |
| AC090498. | 1.29E-51 | 0.33552784   | 0.363 | 0.275 | 3.11E-47 ductal | AC090498.1       |
| CYCS.1    | 1.34E-51 | 0.332060535  | 0.569 | 0.493 | 3.23E-47 ductal | CYCS             |
| ATP5J.1   | 2.98E-51 | 0.298744467  | 0.551 | 0.47  | 7.19E-47 ductal | ATP5J            |
| RAB7A.1   | 3.49E-51 | -0.277165542 | 0.39  | 0.491 | 8.41E-47 ductal | RAB7A            |
| CHCHD2.1  | 4.14E-51 | -0.346104827 | 0.201 | 0.291 | 9.97E-47 ductal | CHCHD2           |
| LAMB3.1   | 5.67E-51 | 0.4646258    | 0.294 | 0.209 | 1.37E-46 ductal | LAMB3            |
| SRRM2.1   | 7.84E-51 | -0.266948921 | 0.163 | 0.251 | 1.89E-46 ductal | SRRM2            |
| EEF1B2.1  | 1.92E-50 | -0.641554188 | 0.736 | 0.726 | 4.64E-46 ductal | EEF1B2           |

|           |          |              |       |       |                 |               |
|-----------|----------|--------------|-------|-------|-----------------|---------------|
| CBLB.1    | 2.98E-50 | -0.312418465 | 0.262 | 0.359 | 7.19E-46 ductal | CBLB          |
| RARRES1.1 | 3.20E-50 | 0.453293524  | 0.266 | 0.181 | 7.72E-46 ductal | RARRES1       |
| AKAP13.1  | 4.75E-50 | -0.329719185 | 0.557 | 0.646 | 1.14E-45 ductal | AKAP13        |
| GNG12.1   | 5.68E-50 | -0.30933461  | 0.269 | 0.366 | 1.37E-45 ductal | GNG12         |
| MYO10.1   | 1.25E-49 | -0.329137703 | 0.199 | 0.289 | 3.01E-45 ductal | MYO10         |
| UBE2L3.1  | 2.04E-49 | 0.329044089  | 0.49  | 0.41  | 4.92E-45 ductal | UBE2L3        |
| ARID1B.1  | 2.22E-49 | -0.296933387 | 0.432 | 0.535 | 5.35E-45 ductal | ARID1B        |
| GHITM.1   | 3.52E-49 | 0.334659664  | 0.494 | 0.416 | 8.49E-45 ductal | GHITM         |
| MAST2.1   | 4.59E-49 | -0.324746735 | 0.171 | 0.258 | 1.11E-44 ductal | MAST2         |
| ASPH.1    | 6.09E-49 | -0.299175248 | 0.228 | 0.321 | 1.47E-44 ductal | ASPH          |
| EIF4G3.1  | 7.88E-49 | -0.314135699 | 0.452 | 0.55  | 1.90E-44 ductal | EIF4G3        |
| DIAPH1.1  | 8.09E-49 | -0.276265823 | 0.239 | 0.335 | 1.95E-44 ductal | DIAPH1        |
| CALR.1    | 8.48E-49 | -0.304341632 | 0.173 | 0.261 | 2.05E-44 ductal | CALR          |
| ARID1A.1  | 9.10E-49 | -0.269520475 | 0.186 | 0.275 | 2.20E-44 ductal | ARID1A        |
| LCOR.1    | 1.21E-48 | -0.330287554 | 0.213 | 0.3   | 2.93E-44 ductal | LCOR          |
| EMP1.1    | 1.76E-48 | 0.613970935  | 0.709 | 0.675 | 4.25E-44 ductal | EMP1          |
| ARL1.1    | 6.13E-48 | 0.303928599  | 0.304 | 0.219 | 1.48E-43 ductal | ARL1          |
| ATP5H.1   | 6.19E-48 | 0.278771447  | 0.407 | 0.318 | 1.49E-43 ductal | ATP5H         |
| HNRNPC.1  | 6.22E-48 | 0.287189649  | 0.803 | 0.773 | 1.50E-43 ductal | HNRNPC        |
| CCT8.1    | 1.57E-47 | 0.343966016  | 0.333 | 0.253 | 3.78E-43 ductal | CCT8          |
| CLIP1.1   | 1.69E-47 | -0.307567124 | 0.34  | 0.438 | 4.07E-43 ductal | CLIP1         |
| BCOR.1    | 1.99E-47 | 0.252453411  | 0.581 | 0.474 | 4.80E-43 ductal | BCOR          |
| CLINT1.1  | 2.15E-47 | 0.347825223  | 0.301 | 0.218 | 5.17E-43 ductal | CLINT1        |
| NFAT5.1   | 2.28E-47 | -0.301446279 | 0.572 | 0.664 | 5.51E-43 ductal | NFAT5         |
| OLA1.1    | 3.77E-47 | -0.312406198 | 0.268 | 0.36  | 9.09E-43 ductal | OLA1          |
| SIK3.1    | 4.21E-47 | 0.511055578  | 0.977 | 0.97  | 1.01E-42 ductal | SIK3          |
| CALCOCO2  | 4.46E-47 | 0.328517216  | 0.304 | 0.222 | 1.07E-42 ductal | CALCOCO2      |
| TMEM41B.  | 6.37E-47 | -0.269266122 | 0.195 | 0.284 | 1.54E-42 ductal | TMEM41B       |
| CHD2.1    | 7.47E-47 | -0.262455812 | 0.483 | 0.589 | 1.80E-42 ductal | CHD2          |
| CYB5A.1   | 2.13E-46 | -0.356672836 | 0.207 | 0.292 | 5.14E-42 ductal | CYB5A         |
| ATXN1.1   | 2.39E-46 | -0.297095111 | 0.455 | 0.554 | 5.76E-42 ductal | ATXN1         |
| CYR61.1   | 2.83E-46 | -0.328001609 | 0.211 | 0.308 | 6.82E-42 ductal | CYR61         |
| CAPN8.1   | 3.98E-46 | -0.265820394 | 0.166 | 0.253 | 9.60E-42 ductal | CAPN8         |
| HIST1H2BD | 4.00E-46 | -0.286588045 | 0.243 | 0.337 | 9.64E-42 ductal | HIST1H2BD     |
| KMT2E.1   | 4.46E-46 | -0.315545915 | 0.408 | 0.503 | 1.08E-41 ductal | KMT2E         |
| PFDN4.1   | 4.87E-46 | 0.294232307  | 0.392 | 0.304 | 1.17E-41 ductal | PFDN4         |
| NDUFV2.1  | 8.60E-46 | -0.28590179  | 0.217 | 0.306 | 2.07E-41 ductal | NDUFV2        |
| THSD4-AS1 | 1.31E-45 | 0.30611415   | 0.508 | 0.43  | 3.15E-41 ductal | THSD4-AS1     |
| PNPLA8.1  | 1.40E-45 | 0.362287384  | 0.332 | 0.249 | 3.38E-41 ductal | PNPLA8        |
| PPM1H.1   | 3.34E-45 | 0.451313773  | 0.363 | 0.286 | 8.06E-41 ductal | PPM1H         |
| CWC15.1   | 3.52E-45 | 0.289046914  | 0.339 | 0.254 | 8.48E-41 ductal | CWC15         |
| SF3B6.1   | 4.47E-45 | 0.278539803  | 0.65  | 0.584 | 1.08E-40 ductal | SF3B6         |
| RP11-511B | 5.62E-45 | 0.287720169  | 0.555 | 0.48  | 1.35E-40 ductal | RP11-511B23.2 |
| PAPSS1.1  | 5.65E-45 | 0.385441547  | 0.277 | 0.201 | 1.36E-40 ductal | PAPSS1        |
| FAM185A.1 | 1.22E-44 | 0.315805045  | 0.259 | 0.183 | 2.93E-40 ductal | FAM185A       |
| SMC5.1    | 1.77E-44 | 0.384267412  | 0.355 | 0.277 | 4.27E-40 ductal | SMC5          |
| OCLN.1    | 1.92E-44 | -0.2770575   | 0.28  | 0.374 | 4.63E-40 ductal | OCLN          |

|           |          |              |       |       |                 |         |
|-----------|----------|--------------|-------|-------|-----------------|---------|
| OSMR.1    | 2.18E-44 | 0.336069944  | 0.359 | 0.277 | 5.26E-40 ductal | OSMR    |
| NCOR1.1   | 3.80E-44 | -0.2618251   | 0.366 | 0.459 | 9.17E-40 ductal | NCOR1   |
| LAMTOR5.1 | 4.05E-44 | 0.270361724  | 0.63  | 0.563 | 9.78E-40 ductal | LAMTOR5 |
| TTC1.1    | 1.73E-43 | 0.315139147  | 0.323 | 0.244 | 4.17E-39 ductal | TTC1    |
| HLA-C.1   | 2.23E-43 | -0.337330652 | 0.262 | 0.346 | 5.37E-39 ductal | HLA-C   |
| NUP153.1  | 2.23E-43 | -0.265996505 | 0.228 | 0.318 | 5.37E-39 ductal | NUP153  |
| TEAD1.1   | 2.45E-43 | -0.278661253 | 0.394 | 0.491 | 5.91E-39 ductal | TEAD1   |
| RBPMS.1   | 3.21E-43 | 0.357114316  | 0.697 | 0.639 | 7.74E-39 ductal | RBPMS   |
| ARID4B.1  | 3.32E-43 | -0.283983033 | 0.498 | 0.593 | 7.99E-39 ductal | ARID4B  |
| CASC15.1  | 6.54E-43 | -0.580943484 | 0.485 | 0.547 | 1.58E-38 ductal | CASC15  |
| USP25.1   | 1.59E-42 | -0.296751993 | 0.209 | 0.292 | 3.83E-38 ductal | USP25   |
| TNRC6B.1  | 1.78E-42 | -0.266207546 | 0.43  | 0.524 | 4.28E-38 ductal | TNRC6B  |
| B4GALT1.1 | 1.80E-42 | -0.252210358 | 0.381 | 0.477 | 4.34E-38 ductal | B4GALT1 |
| ASTN2.1   | 3.64E-42 | -0.302774418 | 0.222 | 0.307 | 8.79E-38 ductal | ASTN2   |
| NEAT1.1   | 4.87E-42 | 0.27713743   | 0.964 | 0.938 | 1.18E-37 ductal | NEAT1   |
| PPP3CA.1  | 5.09E-42 | -0.312091652 | 0.514 | 0.596 | 1.23E-37 ductal | PPP3CA  |
| SOS1.1    | 1.56E-41 | -0.2746161   | 0.315 | 0.405 | 3.76E-37 ductal | SOS1    |
| MARCKS.1  | 1.65E-41 | 0.365769703  | 0.4   | 0.322 | 3.99E-37 ductal | MARCKS  |
| CCDC6.1   | 2.26E-41 | -0.30086367  | 0.266 | 0.351 | 5.46E-37 ductal | CCDC6   |
| SMAD2.1   | 1.04E-40 | -0.274099557 | 0.253 | 0.337 | 2.50E-36 ductal | SMAD2   |
| CXCL1.1   | 1.60E-40 | -0.826750129 | 0.224 | 0.3   | 3.86E-36 ductal | CXCL1   |
| ANKRD12.1 | 1.68E-40 | -0.254682037 | 0.629 | 0.702 | 4.06E-36 ductal | ANKRD12 |
| OVOS2.1   | 2.06E-40 | 0.432405593  | 0.324 | 0.238 | 4.97E-36 ductal | OVOS2   |
| WWP1.1    | 2.25E-40 | -0.284636007 | 0.262 | 0.344 | 5.42E-36 ductal | WWP1    |
| SCOC.1    | 2.86E-40 | 0.258124411  | 0.291 | 0.213 | 6.89E-36 ductal | SCOC    |
| NSRP1.1   | 3.20E-40 | 0.279907825  | 0.257 | 0.184 | 7.73E-36 ductal | NSRP1   |
| CXCL8.1   | 3.86E-40 | 0.868712617  | 0.499 | 0.416 | 9.31E-36 ductal | CXCL8   |
| CLASP2.1  | 4.88E-40 | -0.273200685 | 0.223 | 0.306 | 1.18E-35 ductal | CLASP2  |
| IER3.1    | 1.17E-39 | -0.283325216 | 0.267 | 0.353 | 2.83E-35 ductal | IER3    |
| CAPZA2.1  | 1.39E-39 | 0.292726264  | 0.357 | 0.28  | 3.36E-35 ductal | CAPZA2  |
| GNL3.1    | 1.78E-39 | 0.297840904  | 0.295 | 0.219 | 4.30E-35 ductal | GNL3    |
| COPZ1.1   | 1.88E-39 | 0.259683395  | 0.375 | 0.292 | 4.53E-35 ductal | COPZ1   |
| JUN.1     | 2.73E-39 | -0.301053023 | 0.189 | 0.266 | 6.57E-35 ductal | JUN     |
| PCM1.1    | 3.13E-39 | -0.258072852 | 0.209 | 0.29  | 7.56E-35 ductal | PCM1    |
| DPYD.1    | 5.21E-39 | 0.297142955  | 0.569 | 0.492 | 1.26E-34 ductal | DPYD    |
| WDFY2.1   | 8.76E-39 | -0.261963912 | 0.216 | 0.298 | 2.11E-34 ductal | WDFY2   |
| MRPL22.1  | 9.39E-39 | 0.279325672  | 0.263 | 0.19  | 2.26E-34 ductal | MRPL22  |
| CDK8.1    | 1.70E-38 | -0.319654541 | 0.195 | 0.271 | 4.10E-34 ductal | CDK8    |
| PELI1.1   | 1.93E-38 | 0.365238139  | 0.377 | 0.302 | 4.65E-34 ductal | PELI1   |
| KDM6A.1   | 2.04E-38 | -0.250534289 | 0.312 | 0.402 | 4.93E-34 ductal | KDM6A   |
| LRRFIP2.1 | 2.73E-38 | 0.563876559  | 0.775 | 0.756 | 6.59E-34 ductal | LRRFIP2 |
| MACF1.1   | 4.72E-38 | -0.280333596 | 0.678 | 0.748 | 1.14E-33 ductal | MACF1   |
| TXN.1     | 6.51E-38 | 0.326192722  | 0.697 | 0.664 | 1.57E-33 ductal | TXN     |
| EPB41L5.1 | 1.31E-37 | -0.263229608 | 0.246 | 0.329 | 3.16E-33 ductal | EPB41L5 |
| LMNA.1    | 1.86E-37 | -0.264249999 | 0.184 | 0.263 | 4.48E-33 ductal | LMNA    |
| TMA7.1    | 2.23E-37 | -0.308481366 | 0.557 | 0.631 | 5.37E-33 ductal | TMA7    |
| STAT3.1   | 2.57E-37 | -0.273013662 | 0.492 | 0.568 | 6.19E-33 ductal | STAT3   |



|            |          |              |       |       |                 |          |
|------------|----------|--------------|-------|-------|-----------------|----------|
| SFRP1.1    | 3.33E-37 | 0.271330429  | 0.272 | 0.199 | 8.03E-33 ductal | SFRP1    |
| ANKRD17.1  | 5.43E-37 | -0.253500126 | 0.456 | 0.542 | 1.31E-32 ductal | ANKRD17  |
| GAREM1.1   | 6.56E-37 | -0.278391206 | 0.271 | 0.352 | 1.58E-32 ductal | GAREM1   |
| TBC1D8.1   | 9.73E-37 | -0.257102421 | 0.376 | 0.464 | 2.35E-32 ductal | TBC1D8   |
| DHRXS.1    | 1.27E-36 | -0.27633184  | 0.228 | 0.309 | 3.05E-32 ductal | DHRXS    |
| CLMN.1     | 1.30E-36 | 0.384779269  | 0.571 | 0.512 | 3.13E-32 ductal | CLMN     |
| RBMS1.1    | 1.83E-36 | -0.307301629 | 0.296 | 0.376 | 4.41E-32 ductal | RBMS1    |
| NTN4.1     | 9.01E-36 | -0.272032556 | 0.252 | 0.332 | 2.17E-31 ductal | NTN4     |
| ATP5F1.1   | 9.32E-36 | 0.260841886  | 0.422 | 0.346 | 2.25E-31 ductal | ATP5F1   |
| FAM19A2.1  | 1.05E-35 | -0.413235572 | 0.545 | 0.626 | 2.54E-31 ductal | FAM19A2  |
| PBX1.1     | 1.13E-35 | -0.253940805 | 0.215 | 0.294 | 2.72E-31 ductal | PBX1     |
| TMOD3.1    | 1.52E-35 | -0.279685197 | 0.356 | 0.434 | 3.68E-31 ductal | TMOD3    |
| S100A11.1  | 1.83E-35 | 0.330233016  | 0.751 | 0.709 | 4.42E-31 ductal | S100A11  |
| DENND4A.1  | 2.75E-35 | -0.388182565 | 0.556 | 0.619 | 6.62E-31 ductal | DENND4A  |
| BTF3.1     | 4.10E-35 | -0.450977285 | 0.907 | 0.878 | 9.89E-31 ductal | BTF3     |
| FMNL2.1    | 6.46E-35 | 0.426506093  | 0.395 | 0.329 | 1.56E-30 ductal | FMNL2    |
| PTGES3.1   | 1.15E-34 | -0.26034502  | 0.199 | 0.272 | 2.76E-30 ductal | PTGES3   |
| TCEAL8.1   | 2.77E-34 | 0.265647044  | 0.278 | 0.209 | 6.68E-30 ductal | TCEAL8   |
| SESTD1.1   | 2.95E-34 | 0.304518118  | 0.53  | 0.465 | 7.12E-30 ductal | SESTD1   |
| NRIP1.1    | 3.07E-34 | -0.273717191 | 0.223 | 0.299 | 7.41E-30 ductal | NRIP1    |
| RNF24.1    | 1.35E-33 | 0.306152292  | 0.377 | 0.307 | 3.26E-29 ductal | RNF24    |
| CHD9.1     | 1.69E-33 | 0.2984741    | 0.445 | 0.378 | 4.06E-29 ductal | CHD9     |
| TMTC2.1    | 1.75E-33 | -0.255035282 | 0.327 | 0.411 | 4.23E-29 ductal | TMTC2    |
| FDFT1.1    | 2.36E-33 | -0.262290527 | 0.268 | 0.344 | 5.69E-29 ductal | FDFT1    |
| SMAD3.1    | 4.17E-33 | -0.314881433 | 0.23  | 0.298 | 1.01E-28 ductal | SMAD3    |
| GPD2.1     | 9.53E-33 | -0.311547071 | 0.287 | 0.36  | 2.30E-28 ductal | GPD2     |
| STK39.1    | 9.67E-33 | -0.388839003 | 0.196 | 0.267 | 2.33E-28 ductal | STK39    |
| MAML3.1    | 1.21E-32 | -0.313901227 | 0.305 | 0.381 | 2.92E-28 ductal | MAML3    |
| FRYL.1     | 1.69E-32 | -0.261671492 | 0.351 | 0.428 | 4.07E-28 ductal | FRYL     |
| RAPGEF5.1  | 2.20E-32 | 0.31105566   | 0.385 | 0.312 | 5.30E-28 ductal | RAPGEF5  |
| PSMC6.1    | 2.34E-32 | 0.275365565  | 0.359 | 0.291 | 5.64E-28 ductal | PSMC6    |
| MMADHC.1   | 5.74E-32 | 0.265487469  | 0.351 | 0.284 | 1.38E-27 ductal | MMADHC   |
| PIN4.1     | 7.61E-32 | 0.257863758  | 0.311 | 0.243 | 1.84E-27 ductal | PIN4     |
| REL.1      | 1.38E-31 | -0.255724162 | 0.255 | 0.33  | 3.33E-27 ductal | REL      |
| SEC11A.1   | 2.34E-31 | 0.250782165  | 0.524 | 0.461 | 5.63E-27 ductal | SEC11A   |
| EIF4E2.1   | 4.14E-31 | 0.25400183   | 0.365 | 0.3   | 9.98E-27 ductal | EIF4E2   |
| IRF2.1     | 6.59E-31 | 0.258086817  | 0.274 | 0.209 | 1.59E-26 ductal | IRF2     |
| CX3CL1.1   | 9.76E-31 | -0.262721801 | 0.189 | 0.259 | 2.35E-26 ductal | CX3CL1   |
| SPATS2L.1  | 1.32E-30 | 0.322681896  | 0.279 | 0.216 | 3.19E-26 ductal | SPATS2L  |
| NDUFB4.1   | 1.43E-30 | -0.262547702 | 0.386 | 0.467 | 3.44E-26 ductal | NDUFB4   |
| PSTPIP2.1  | 1.59E-30 | 0.362478257  | 0.265 | 0.203 | 3.83E-26 ductal | PSTPIP2  |
| ARHGEF38.1 | 5.28E-30 | -0.288343551 | 0.44  | 0.513 | 1.27E-25 ductal | ARHGEF38 |
| SORBS2.1   | 6.82E-30 | 0.44267285   | 0.423 | 0.356 | 1.64E-25 ductal | SORBS2   |
| DAPK2.1    | 7.57E-30 | 0.281008812  | 0.275 | 0.21  | 1.82E-25 ductal | DAPK2    |
| PRDM2.1    | 1.96E-29 | -0.318579717 | 0.252 | 0.325 | 4.73E-25 ductal | PRDM2    |
| GPRC5A.1   | 2.12E-29 | -0.27820975  | 0.346 | 0.42  | 5.11E-25 ductal | GPRC5A   |
| HES1.1     | 2.24E-29 | -0.409825389 | 0.3   | 0.371 | 5.40E-25 ductal | HES1     |

|            |          |              |       |       |                 |             |
|------------|----------|--------------|-------|-------|-----------------|-------------|
| PALLD.1    | 3.53E-29 | 0.349049516  | 0.439 | 0.381 | 8.51E-25 ductal | PALLD       |
| PSMD11.1   | 8.70E-29 | 0.267004151  | 0.297 | 0.235 | 2.10E-24 ductal | PSMD11      |
| CAPN2.1    | 1.24E-28 | 0.259521803  | 0.335 | 0.27  | 2.98E-24 ductal | CAPN2       |
| PNRC1.1    | 3.44E-28 | 0.279586325  | 0.454 | 0.397 | 8.29E-24 ductal | PNRC1       |
| TJP2.1     | 3.65E-28 | 0.329644375  | 0.358 | 0.301 | 8.79E-24 ductal | TJP2        |
| RPS2.1     | 5.54E-28 | -0.278728476 | 0.231 | 0.303 | 1.34E-23 ductal | RPS2        |
| ABHD18.1   | 9.51E-28 | -0.271354829 | 0.303 | 0.372 | 2.29E-23 ductal | ABHD18      |
| RASA2.1    | 2.73E-27 | 0.336641372  | 0.573 | 0.521 | 6.58E-23 ductal | RASA2       |
| YPEL5.1    | 2.81E-27 | 0.288254474  | 0.436 | 0.38  | 6.76E-23 ductal | YPEL5       |
| RIPK2.1    | 3.78E-27 | 0.362925506  | 0.318 | 0.258 | 9.12E-23 ductal | RIPK2       |
| HNRNPA3.   | 3.99E-27 | 0.257383514  | 0.302 | 0.242 | 9.63E-23 ductal | HNRNPA3     |
| CAST.1     | 1.21E-26 | 0.254268522  | 0.546 | 0.494 | 2.93E-22 ductal | CAST        |
| TPT1-AS1.1 | 1.83E-26 | 0.27866689   | 0.272 | 0.214 | 4.42E-22 ductal | TPT1-AS1    |
| GLUL.1     | 2.01E-26 | -0.250815655 | 0.331 | 0.407 | 4.84E-22 ductal | GLUL        |
| AC016831.  | 3.90E-26 | 0.306951453  | 0.296 | 0.236 | 9.40E-22 ductal | AC016831.7  |
| MAP4K5.1   | 4.73E-26 | 0.302383327  | 0.325 | 0.265 | 1.14E-21 ductal | MAP4K5      |
| ARHGEF10.  | 1.51E-25 | 0.338956013  | 0.254 | 0.2   | 3.65E-21 ductal | ARHGEF10    |
| SEPP1.1    | 1.53E-25 | -0.262267563 | 0.272 | 0.339 | 3.69E-21 ductal | SEPP1       |
| S100A14.1  | 4.09E-25 | 0.267454518  | 0.754 | 0.724 | 9.86E-21 ductal | S100A14     |
| CD55.1     | 4.50E-25 | 0.281018936  | 0.326 | 0.269 | 1.08E-20 ductal | CD55        |
| PTBP2.1    | 9.05E-25 | 0.265052147  | 0.381 | 0.324 | 2.18E-20 ductal | PTBP2       |
| CMIP.1     | 1.24E-24 | 0.268505439  | 0.303 | 0.246 | 2.99E-20 ductal | CMIP        |
| JARID2.1   | 3.11E-24 | -0.378592599 | 0.215 | 0.277 | 7.49E-20 ductal | JARID2      |
| MPZL1.1    | 3.51E-24 | 0.267344084  | 0.41  | 0.355 | 8.46E-20 ductal | MPZL1       |
| RPSA.1     | 5.14E-24 | -0.431356109 | 0.831 | 0.798 | 1.24E-19 ductal | RPSA        |
| EXT1.1     | 9.46E-24 | 0.303487422  | 0.531 | 0.478 | 2.28E-19 ductal | EXT1        |
| CRIM1.1    | 1.25E-23 | 0.372928769  | 0.469 | 0.424 | 3.02E-19 ductal | CRIM1       |
| LSAMP.1    | 2.35E-23 | -0.44204311  | 0.449 | 0.487 | 5.67E-19 ductal | LSAMP       |
| PDE8A.1    | 6.30E-23 | 0.275173431  | 0.363 | 0.308 | 1.52E-18 ductal | PDE8A       |
| CLK1.1     | 4.02E-22 | 0.275417545  | 0.45  | 0.399 | 9.69E-18 ductal | CLK1        |
| KDM7A.1    | 4.64E-21 | 0.253560606  | 0.308 | 0.257 | 1.12E-16 ductal | KDM7A       |
| TACSTD2.1  | 7.05E-21 | -0.31891673  | 0.717 | 0.739 | 1.70E-16 ductal | TACSTD2     |
| ATP13A3.1  | 3.57E-19 | 0.286541461  | 0.293 | 0.245 | 8.62E-15 ductal | ATP13A3     |
| RPS27.1    | 4.59E-19 | 1.065799586  | 0.648 | 0.631 | 1.11E-14 ductal | RPS27       |
| ERO1A.1    | 3.66E-18 | 0.355366203  | 0.467 | 0.426 | 8.84E-14 ductal | ERO1A       |
| ADAM17.1   | 3.69E-18 | 0.267581125  | 0.41  | 0.368 | 8.90E-14 ductal | ADAM17      |
| HIVEP2.1   | 1.18E-17 | -0.379451804 | 0.429 | 0.465 | 2.85E-13 ductal | HIVEP2      |
| DHFR.1     | 9.13E-15 | 0.262560868  | 0.786 | 0.794 | 2.20E-10 ductal | DHFR        |
| DAAM1.1    | 7.74E-13 | 0.299100891  | 0.524 | 0.501 | 1.87E-08 ductal | DAAM1       |
| RP11-37B2  | 2.45E-12 | 0.259501697  | 0.25  | 0.214 | 5.90E-08 ductal | RP11-37B2.1 |
| TNFSF10.1  | 9.84E-12 | 0.395674103  | 0.487 | 0.466 | 2.37E-07 ductal | TNFSF10     |
| FOSB.1     | 1.53E-11 | 0.262509169  | 0.413 | 0.386 | 3.68E-07 ductal | FOSB        |
| IFRD1.1    | 2.64E-11 | 0.253683866  | 0.37  | 0.342 | 6.38E-07 ductal | IFRD1       |
| ATP5EP2.1  | 2.93E-11 | -0.265058578 | 0.287 | 0.317 | 7.06E-07 ductal | ATP5EP2     |
| BAIAP2L1.1 | 2.14E-10 | -0.355432154 | 0.953 | 0.911 | 5.17E-06 ductal | BAIAP2L1    |
| DAPK1.1    | 3.37E-10 | 0.364604726  | 0.462 | 0.577 | 8.13E-06 ductal | DAPK1       |
| ADAM9.1    | 4.98E-10 | 0.266710572  | 0.579 | 0.563 | 1.20E-05 ductal | ADAM9       |
