# Supplementary material for: Ductal keratin 15+ luminal progenitors in normal breast exhibit a basal-like breast cancer transcriptomic signature
Source: PubMed Central journal article supplement (PMC9276673; doi:10.1038/s41523-022-00444-8), 2022-07-12
Supplement: 41523_2022_444_MOESM6_ESM.pdf [file 41523_2022_444_MOESM6_ESM.pdf]

## Supplementary Data 4.

DEGs among clusters 1.1, 1.2, 1.3 and 1.4.

A cutoff of 0.1 for the log<sub>2</sub>FC and 1% for the relative number of cells expressing the gene in the given cluster were applied to obtain the list of DEGs.

Abbreviations:      p\_val = p-value  
                         avg\_log2FC = average log<sub>2</sub>(fold change)  
                         pct.1 = percentage of cells in which the gene is detected in a given cluster  
                         pct.2 = percentage of cell in which the gene is detected in the rest of cells  
                         p\_val\_adj = adjusted p-value

| gene      | p_val     | avg_log2FC   | pct.1 | pct.2 | p_val_adj | cluster |
|-----------|-----------|--------------|-------|-------|-----------|---------|
| OSBPL9    | 0         | 1.506227788  | 0.712 | 0.373 | 0         | 1.1     |
| PSME4     | 0         | 1.314285145  | 0.846 | 0.648 | 0         | 1.1     |
| EIF2AK3   | 0         | 1.811317759  | 0.603 | 0.191 | 0         | 1.1     |
| LRRFIP2   | 0         | 1.470910615  | 0.94  | 0.769 | 0         | 1.1     |
| TSC22D2   | 0         | 1.653394461  | 0.614 | 0.219 | 0         | 1.1     |
| RARRES1   | 0         | -2.025698144 | 0.073 | 0.518 | 0         | 1.1     |
| TRIO      | 0         | 1.448304337  | 0.905 | 0.686 | 0         | 1.1     |
| SOD2      | 0         | -1.259023531 | 0.837 | 0.984 | 0         | 1.1     |
| SAT1      | 0         | -1.494038621 | 0.924 | 0.976 | 0         | 1.1     |
| FTX       | 0         | -1.586062931 | 0.159 | 0.681 | 0         | 1.1     |
| HSPA5     | 0         | 2.109216515  | 0.703 | 0.285 | 0         | 1.1     |
| SAA2-SAA4 | 0         | -1.618097305 | 0.044 | 0.495 | 0         | 1.1     |
| SAA1      | 0         | -3.450793334 | 0.88  | 0.981 | 0         | 1.1     |
| CD59      | 0         | -1.680100701 | 0.619 | 0.953 | 0         | 1.1     |
| NEAT1     | 0         | -0.957630284 | 0.89  | 0.991 | 0         | 1.1     |
| FRMD4A    | 0         | -1.992699665 | 0.122 | 0.606 | 0         | 1.1     |
| HNRNPA1   | 0         | 0.954124183  | 0.956 | 0.872 | 0         | 1.1     |
| UBC       | 0         | 1.982467159  | 0.988 | 0.936 | 0         | 1.1     |
| RP11-519G | 0         | -1.853625347 | 0.137 | 0.629 | 0         | 1.1     |
| DTNA      | 0         | 1.459515075  | 0.882 | 0.664 | 0         | 1.1     |
| OSER1     | 0         | 2.087743858  | 0.857 | 0.439 | 0         | 1.1     |
| MLLT4     | 6.42E-308 | 1.259209192  | 0.845 | 0.597 | 1.55E-303 | 1.1     |
| CYR61     | 5.97E-307 | 2.290999488  | 0.546 | 0.191 | 1.44E-302 | 1.1     |
| SLPI      | 2.60E-299 | -2.423934879 | 0.636 | 0.878 | 6.27E-295 | 1.1     |
| EVA1C     | 2.67E-284 | -1.539105662 | 0.133 | 0.563 | 6.44E-280 | 1.1     |
| N4BP2L2   | 3.86E-280 | -1.057833391 | 0.448 | 0.823 | 9.30E-276 | 1.1     |
| S100A11   | 1.00E-278 | -1.358509701 | 0.424 | 0.807 | 2.42E-274 | 1.1     |
| DEFB1     | 1.82E-278 | -1.824381852 | 0.302 | 0.704 | 4.40E-274 | 1.1     |
| TXNIP     | 5.82E-277 | -1.561210396 | 0.152 | 0.576 | 1.40E-272 | 1.1     |
| LTF       | 2.27E-274 | -1.665019812 | 0.393 | 0.764 | 5.48E-270 | 1.1     |
| OVOS2     | 2.99E-270 | -2.495592344 | 0.219 | 0.602 | 7.20E-266 | 1.1     |
| FOXP1     | 3.42E-268 | -1.304143375 | 0.244 | 0.661 | 8.25E-264 | 1.1     |
| C15orf48  | 1.21E-265 | -2.513414065 | 0.2   | 0.59  | 2.93E-261 | 1.1     |
| KRT15     | 6.81E-264 | 1.433175153  | 0.601 | 0.248 | 1.64E-259 | 1.1     |
| KYNU      | 1.03E-259 | -2.298366339 | 0.091 | 0.484 | 2.48E-255 | 1.1     |
| MTHFD2L   | 1.25E-257 | -1.362973863 | 0.333 | 0.717 | 3.01E-253 | 1.1     |
| WFDC2     | 6.78E-253 | -1.989638039 | 0.191 | 0.61  | 1.64E-248 | 1.1     |
| MGST1     | 7.82E-250 | -1.095468082 | 0.794 | 0.916 | 1.89E-245 | 1.1     |
| RNF145    | 4.14E-249 | 1.285247173  | 0.744 | 0.498 | 9.98E-245 | 1.1     |
| DPYD      | 6.14E-240 | -1.276351146 | 0.231 | 0.64  | 1.48E-235 | 1.1     |
| RPS4X     | 4.67E-239 | 0.517097604  | 0.994 | 0.98  | 1.13E-234 | 1.1     |
| HSP90B1   | 1.08E-236 | 1.233899888  | 0.684 | 0.39  | 2.61E-232 | 1.1     |
| CYP7B1    | 1.08E-235 | -1.614077921 | 0.093 | 0.477 | 2.60E-231 | 1.1     |
| LUCAT1    | 1.81E-235 | -1.462967965 | 0.116 | 0.501 | 4.37E-231 | 1.1     |
| LYN       | 7.75E-235 | -1.033594927 | 0.408 | 0.789 | 1.87E-230 | 1.1     |
| OSMR      | 1.00E-233 | -1.185668188 | 0.09  | 0.476 | 2.42E-229 | 1.1     |

|          |           |              |       |       |           |     |
|----------|-----------|--------------|-------|-------|-----------|-----|
| RASA2    | 6.91E-232 | 1.214856484  | 0.792 | 0.573 | 1.67E-227 | 1.1 |
| CCL2     | 2.11E-225 | -3.505392221 | 0.173 | 0.525 | 5.09E-221 | 1.1 |
| FLNB     | 1.08E-215 | 1.167282833  | 0.596 | 0.301 | 2.60E-211 | 1.1 |
| TNFAIP6  | 1.09E-210 | -2.013162728 | 0.149 | 0.516 | 2.62E-206 | 1.1 |
| FBLN5    | 1.50E-210 | -1.766184265 | 0.08  | 0.427 | 3.62E-206 | 1.1 |
| ST5      | 6.88E-205 | -1.252735877 | 0.128 | 0.486 | 1.66E-200 | 1.1 |
| PSTPIP2  | 4.50E-204 | -1.262867877 | 0.1   | 0.45  | 1.08E-199 | 1.1 |
| WAC      | 3.64E-203 | 0.999582807  | 0.769 | 0.577 | 8.79E-199 | 1.1 |
| SLC34A2  | 1.00E-202 | -1.179437098 | 0.043 | 0.373 | 2.42E-198 | 1.1 |
| TBC1D5   | 3.72E-200 | -1.136453626 | 0.101 | 0.447 | 8.98E-196 | 1.1 |
| ANKRD36C | 6.64E-199 | -1.409189278 | 0.312 | 0.649 | 1.60E-194 | 1.1 |
| PPP2R3A  | 3.93E-193 | -1.059524102 | 0.148 | 0.504 | 9.49E-189 | 1.1 |
| LHFPL2   | 2.87E-191 | 1.153741689  | 0.597 | 0.33  | 6.92E-187 | 1.1 |
| AUH      | 1.67E-188 | 1.182383151  | 0.536 | 0.267 | 4.02E-184 | 1.1 |
| RAD23B   | 2.55E-188 | 1.090957159  | 0.611 | 0.351 | 6.15E-184 | 1.1 |
| ARHGAP26 | 1.09E-185 | -1.053953436 | 0.691 | 0.886 | 2.64E-181 | 1.1 |
| VNN3     | 3.22E-185 | -1.400132274 | 0.044 | 0.353 | 7.77E-181 | 1.1 |
| ZBTB20   | 6.34E-185 | -1.058972666 | 0.223 | 0.575 | 1.53E-180 | 1.1 |
| FGFR1    | 3.19E-182 | 1.145160623  | 0.345 | 0.103 | 7.69E-178 | 1.1 |
| SORBS1   | 3.26E-181 | -1.10976181  | 0.103 | 0.431 | 7.86E-177 | 1.1 |
| CCND3    | 5.36E-180 | -1.13748311  | 0.113 | 0.446 | 1.29E-175 | 1.1 |
| SPIDR    | 1.19E-177 | -0.982674003 | 0.343 | 0.681 | 2.86E-173 | 1.1 |
| EEF1A1   | 1.57E-177 | 0.439450107  | 0.993 | 0.98  | 3.79E-173 | 1.1 |
| PI3      | 2.29E-177 | -2.852196142 | 0.072 | 0.377 | 5.53E-173 | 1.1 |
| RLF      | 4.44E-177 | 1.207979504  | 0.538 | 0.281 | 1.07E-172 | 1.1 |
| AGAP1    | 1.42E-175 | -1.084214837 | 0.386 | 0.702 | 3.43E-171 | 1.1 |
| ENAH     | 5.56E-175 | 1.13468292   | 0.655 | 0.427 | 1.34E-170 | 1.1 |
| NPAS2    | 7.20E-175 | -1.025689849 | 0.23  | 0.577 | 1.74E-170 | 1.1 |
| ALPK1    | 8.91E-174 | -1.033233947 | 0.073 | 0.381 | 2.15E-169 | 1.1 |
| VNN1     | 8.12E-173 | -1.133844156 | 0.041 | 0.337 | 1.96E-168 | 1.1 |
| MAST4    | 3.00E-171 | -1.225781677 | 0.146 | 0.468 | 7.24E-167 | 1.1 |
| COBL     | 4.76E-171 | 1.064650669  | 0.672 | 0.434 | 1.15E-166 | 1.1 |
| MGAM2    | 9.95E-171 | -1.30601262  | 0.108 | 0.421 | 2.40E-166 | 1.1 |
| INADL    | 1.79E-169 | -0.741090598 | 0.591 | 0.874 | 4.31E-165 | 1.1 |
| TNFAIP2  | 4.77E-168 | -1.36356761  | 0.075 | 0.378 | 1.15E-163 | 1.1 |
| ABI1     | 2.13E-167 | 0.874450884  | 0.831 | 0.691 | 5.13E-163 | 1.1 |
| FDPS     | 2.33E-166 | -1.235649207 | 0.24  | 0.542 | 5.62E-162 | 1.1 |
| TMTC2    | 2.12E-164 | -1.038179898 | 0.087 | 0.392 | 5.12E-160 | 1.1 |
| C3       | 4.52E-164 | -0.94091377  | 0.081 | 0.384 | 1.09E-159 | 1.1 |
| SLFN5    | 1.64E-162 | -0.779911725 | 0.1   | 0.416 | 3.95E-158 | 1.1 |
| RPL30    | 1.76E-162 | 0.446785432  | 0.99  | 0.976 | 4.24E-158 | 1.1 |
| 5-Mar    | 2.59E-162 | 1.004396042  | 0.417 | 0.167 | 6.25E-158 | 1.1 |
| RPS6     | 1.06E-161 | 0.402635978  | 0.994 | 0.981 | 2.55E-157 | 1.1 |
| TM4SF1   | 8.17E-161 | 1.199608063  | 0.936 | 0.884 | 1.97E-156 | 1.1 |
| USP53    | 1.16E-160 | 1.064815132  | 0.798 | 0.622 | 2.80E-156 | 1.1 |
| MYO5B    | 7.71E-159 | 1.162086285  | 0.729 | 0.551 | 1.86E-154 | 1.1 |
| PTPN2    | 1.34E-157 | -0.940716272 | 0.147 | 0.455 | 3.22E-153 | 1.1 |

|          |           |              |       |       |           |     |
|----------|-----------|--------------|-------|-------|-----------|-----|
| SOS1     | 1.33E-154 | -0.964444956 | 0.155 | 0.465 | 3.21E-150 | 1.1 |
| DAAM1    | 1.59E-153 | 1.029126956  | 0.672 | 0.459 | 3.83E-149 | 1.1 |
| SLC28A3  | 1.47E-152 | -0.874549268 | 0.128 | 0.444 | 3.55E-148 | 1.1 |
| CRY1     | 1.83E-152 | 1.117955983  | 0.523 | 0.279 | 4.42E-148 | 1.1 |
| SLC25A37 | 3.44E-152 | -0.777678652 | 0.474 | 0.787 | 8.29E-148 | 1.1 |
| USP39    | 9.73E-151 | -0.819648329 | 0.128 | 0.433 | 2.35E-146 | 1.1 |
| HILPDA   | 1.68E-150 | 1.276193529  | 0.428 | 0.182 | 4.04E-146 | 1.1 |
| ATP5G2   | 1.74E-150 | 0.824781499  | 0.835 | 0.767 | 4.20E-146 | 1.1 |
| RAPGEF5  | 2.94E-150 | -0.906107631 | 0.243 | 0.568 | 7.09E-146 | 1.1 |
| SRRM1    | 6.58E-150 | 0.808664412  | 0.766 | 0.62  | 1.59E-145 | 1.1 |
| TMEM165  | 1.81E-149 | -0.857606783 | 0.24  | 0.562 | 4.35E-145 | 1.1 |
| ARHGEF28 | 2.25E-149 | 1.283188262  | 0.551 | 0.324 | 5.42E-145 | 1.1 |
| ROPN1B   | 2.30E-149 | 0.803415155  | 0.281 | 0.079 | 5.55E-145 | 1.1 |
| DTNB     | 6.40E-149 | -0.853039325 | 0.348 | 0.662 | 1.54E-144 | 1.1 |
| GOLGA4   | 6.73E-149 | 0.841160315  | 0.764 | 0.609 | 1.62E-144 | 1.1 |
| EFNA5    | 1.79E-148 | -0.897392137 | 0.253 | 0.585 | 4.31E-144 | 1.1 |
| AKR1C3   | 2.45E-148 | -0.907421189 | 0.012 | 0.256 | 5.90E-144 | 1.1 |
| SLC12A2  | 7.98E-148 | -1.127826054 | 0.318 | 0.619 | 1.92E-143 | 1.1 |
| DOCK4    | 9.34E-147 | -1.141266626 | 0.142 | 0.435 | 2.25E-142 | 1.1 |
| DYNLT1   | 1.11E-146 | -0.822182275 | 0.401 | 0.695 | 2.68E-142 | 1.1 |
| FAM177B  | 1.64E-146 | -1.06811054  | 0.405 | 0.727 | 3.95E-142 | 1.1 |
| ANK3     | 2.66E-146 | -1.000381457 | 0.128 | 0.421 | 6.42E-142 | 1.1 |
| MYO6     | 1.50E-142 | 0.977688696  | 0.748 | 0.61  | 3.62E-138 | 1.1 |
| RBM47    | 3.79E-142 | -0.821303352 | 0.365 | 0.671 | 9.13E-138 | 1.1 |
| PRDX1    | 5.29E-142 | -1.107720437 | 0.576 | 0.769 | 1.28E-137 | 1.1 |
| DHFR     | 6.69E-142 | 0.664141048  | 0.914 | 0.825 | 1.61E-137 | 1.1 |
| NPM1     | 1.12E-141 | 0.58252759   | 0.938 | 0.902 | 2.69E-137 | 1.1 |
| RPL11    | 1.52E-141 | 0.461562281  | 0.991 | 0.977 | 3.67E-137 | 1.1 |
| ADAM9    | 3.55E-140 | 0.992108684  | 0.705 | 0.533 | 8.57E-136 | 1.1 |
| EIF4G3   | 7.94E-139 | -0.885789472 | 0.115 | 0.399 | 1.91E-134 | 1.1 |
| CHODL    | 9.18E-139 | -1.086180951 | 0.025 | 0.265 | 2.21E-134 | 1.1 |
| CADPS2   | 1.10E-138 | -0.867522518 | 0.103 | 0.386 | 2.66E-134 | 1.1 |
| RIN2     | 1.00E-137 | -0.897607657 | 0.106 | 0.385 | 2.41E-133 | 1.1 |
| PROM1    | 2.05E-137 | -0.847470313 | 0.232 | 0.538 | 4.95E-133 | 1.1 |
| TLR2     | 3.16E-137 | -0.82848565  | 0.063 | 0.327 | 7.63E-133 | 1.1 |
| PLEKHA5  | 4.95E-137 | -0.827259275 | 0.198 | 0.501 | 1.19E-132 | 1.1 |
| EGFR     | 6.59E-137 | -0.943605303 | 0.126 | 0.411 | 1.59E-132 | 1.1 |
| PPM1H    | 1.62E-136 | -0.908113351 | 0.165 | 0.457 | 3.90E-132 | 1.1 |
| DDX21    | 2.44E-136 | 0.809480812  | 0.742 | 0.584 | 5.89E-132 | 1.1 |
| RUNX1    | 3.13E-135 | -0.87895928  | 0.341 | 0.644 | 7.55E-131 | 1.1 |
| CTSB     | 5.44E-135 | -0.991996462 | 0.107 | 0.375 | 1.31E-130 | 1.1 |
| CPEB3    | 6.27E-135 | 1.060290516  | 0.499 | 0.275 | 1.51E-130 | 1.1 |
| RPS24    | 7.90E-135 | 0.40151675   | 0.993 | 0.979 | 1.90E-130 | 1.1 |
| AFF1     | 1.45E-134 | -0.813385511 | 0.095 | 0.37  | 3.50E-130 | 1.1 |
| HSP90AB1 | 8.16E-134 | 0.512561813  | 0.96  | 0.928 | 1.97E-129 | 1.1 |
| ST6GAL1  | 1.27E-133 | -0.859178455 | 0.127 | 0.413 | 3.05E-129 | 1.1 |
| GPBP1    | 3.30E-133 | 0.834527393  | 0.725 | 0.578 | 7.95E-129 | 1.1 |

|           |           |              |       |       |           |     |
|-----------|-----------|--------------|-------|-------|-----------|-----|
| QKI       | 3.53E-132 | 1.008684013  | 0.655 | 0.493 | 8.51E-128 | 1.1 |
| HS3ST4    | 9.84E-132 | -1.030108857 | 0.142 | 0.419 | 2.37E-127 | 1.1 |
| PLSCR1    | 3.79E-131 | -0.761165259 | 0.093 | 0.361 | 9.15E-127 | 1.1 |
| MT-ND3    | 7.13E-131 | -0.496583725 | 0.979 | 0.986 | 1.72E-126 | 1.1 |
| THRB      | 3.26E-130 | -0.823376687 | 0.095 | 0.37  | 7.85E-126 | 1.1 |
| NAA25     | 5.07E-130 | 0.980382404  | 0.484 | 0.259 | 1.22E-125 | 1.1 |
| L3MBTL4   | 1.35E-129 | -0.849596997 | 0.133 | 0.414 | 3.26E-125 | 1.1 |
| LINC-PINT | 2.42E-129 | -0.957508312 | 0.332 | 0.622 | 5.84E-125 | 1.1 |
| OSMR-AS1  | 1.44E-128 | -0.790650484 | 0.028 | 0.258 | 3.48E-124 | 1.1 |
| THUMPD3-  | 2.17E-128 | -0.77658634  | 0.109 | 0.376 | 5.23E-124 | 1.1 |
| FAM13A    | 5.36E-128 | 1.259525704  | 0.524 | 0.324 | 1.29E-123 | 1.1 |
| NEDD4L    | 1.71E-127 | 0.858905197  | 0.692 | 0.495 | 4.13E-123 | 1.1 |
| PLCB1     | 2.34E-127 | -0.980320976 | 0.19  | 0.473 | 5.65E-123 | 1.1 |
| NACA      | 3.94E-127 | 0.464960263  | 0.979 | 0.957 | 9.49E-123 | 1.1 |
| RICTOR    | 1.02E-126 | 0.897930234  | 0.66  | 0.477 | 2.45E-122 | 1.1 |
| IFRD1     | 1.03E-126 | 0.935250454  | 0.542 | 0.321 | 2.47E-122 | 1.1 |
| MKL1      | 2.60E-126 | 1.054886782  | 0.623 | 0.439 | 6.27E-122 | 1.1 |
| KMT2C     | 1.98E-125 | 0.906946211  | 0.702 | 0.582 | 4.76E-121 | 1.1 |
| CORO1C    | 2.76E-125 | 0.847332356  | 0.398 | 0.178 | 6.65E-121 | 1.1 |
| RPL31     | 5.10E-125 | 0.454365655  | 0.983 | 0.958 | 1.23E-120 | 1.1 |
| SLC11A2   | 6.36E-124 | -0.75725814  | 0.217 | 0.506 | 1.53E-119 | 1.1 |
| RPL32     | 7.26E-124 | 0.464269742  | 0.995 | 0.981 | 1.75E-119 | 1.1 |
| SIK2      | 1.21E-123 | -0.79163914  | 0.128 | 0.398 | 2.91E-119 | 1.1 |
| SERPINB7  | 2.32E-123 | -1.208284879 | 0.033 | 0.255 | 5.60E-119 | 1.1 |
| UBE2H     | 9.16E-123 | 0.730249119  | 0.796 | 0.688 | 2.21E-118 | 1.1 |
| GAB1      | 2.05E-122 | -0.947414557 | 0.165 | 0.433 | 4.95E-118 | 1.1 |
| ZFAS1     | 2.22E-122 | 0.432023602  | 0.979 | 0.956 | 5.36E-118 | 1.1 |
| ITPR2     | 1.93E-121 | -0.943525369 | 0.353 | 0.613 | 4.66E-117 | 1.1 |
| MT-ATP6   | 3.39E-121 | -0.530372613 | 0.982 | 0.989 | 8.18E-117 | 1.1 |
| 3-Mar     | 3.49E-121 | -1.064914664 | 0.042 | 0.27  | 8.41E-117 | 1.1 |
| RERE      | 8.92E-121 | -0.717397056 | 0.221 | 0.506 | 2.15E-116 | 1.1 |
| PPP2CB    | 2.19E-120 | 0.875770581  | 0.464 | 0.252 | 5.27E-116 | 1.1 |
| CHI3L1    | 3.84E-120 | -1.672470406 | 0.038 | 0.26  | 9.25E-116 | 1.1 |
| RAD21     | 4.93E-120 | 0.876741423  | 0.512 | 0.305 | 1.19E-115 | 1.1 |
| RPS23     | 1.38E-119 | 0.453765113  | 0.994 | 0.98  | 3.33E-115 | 1.1 |
| PLA2R1    | 2.19E-119 | -0.837610253 | 0.063 | 0.302 | 5.28E-115 | 1.1 |
| CHI3L2    | 3.77E-119 | -1.21347955  | 0.314 | 0.566 | 9.08E-115 | 1.1 |
| ZMYND8    | 4.04E-119 | -0.838147793 | 0.08  | 0.325 | 9.74E-115 | 1.1 |
| CD44      | 4.70E-119 | -0.738817131 | 0.263 | 0.56  | 1.13E-114 | 1.1 |
| MAP3K5    | 7.00E-119 | -0.868374531 | 0.13  | 0.391 | 1.69E-114 | 1.1 |
| TRPS1     | 3.35E-118 | -0.908744228 | 0.569 | 0.772 | 8.08E-114 | 1.1 |
| PDIA6     | 4.05E-118 | 0.892173727  | 0.398 | 0.191 | 9.76E-114 | 1.1 |
| KIAA0922  | 4.45E-118 | 1.288350738  | 0.409 | 0.208 | 1.07E-113 | 1.1 |
| THADA     | 1.26E-116 | -1.173831786 | 0.095 | 0.337 | 3.04E-112 | 1.1 |
| RIPK2     | 1.47E-116 | 0.950865946  | 0.55  | 0.342 | 3.54E-112 | 1.1 |
| ATF3      | 2.32E-116 | 1.063347876  | 0.493 | 0.29  | 5.60E-112 | 1.1 |
| CXCR4     | 2.59E-116 | 1.312490662  | 0.449 | 0.245 | 6.24E-112 | 1.1 |

|                   |           |              |       |       |           |     |
|-------------------|-----------|--------------|-------|-------|-----------|-----|
| SELK              | 3.73E-116 | 0.771209167  | 0.767 | 0.642 | 9.00E-112 | 1.1 |
| RSRC2             | 5.65E-116 | 0.825126551  | 0.708 | 0.566 | 1.36E-111 | 1.1 |
| RPS15A            | 1.33E-115 | 0.421946799  | 0.984 | 0.965 | 3.20E-111 | 1.1 |
| PIK3R1            | 2.65E-115 | -0.961439705 | 0.09  | 0.331 | 6.40E-111 | 1.1 |
| ITFG1             | 1.34E-114 | -0.782091869 | 0.073 | 0.307 | 3.24E-110 | 1.1 |
| RPL35A            | 2.55E-114 | 0.446906005  | 0.992 | 0.977 | 6.16E-110 | 1.1 |
| GBP1              | 1.19E-113 | 0.993311621  | 0.336 | 0.139 | 2.86E-109 | 1.1 |
| TOMM7             | 2.35E-113 | 0.535320675  | 0.929 | 0.899 | 5.68E-109 | 1.1 |
| BPTF              | 2.07E-112 | -0.710813414 | 0.146 | 0.403 | 5.00E-108 | 1.1 |
| MXD1              | 2.18E-112 | 0.807093987  | 0.298 | 0.11  | 5.27E-108 | 1.1 |
| EXOC4             | 2.22E-112 | -0.772199366 | 0.113 | 0.359 | 5.35E-108 | 1.1 |
| AUTS2             | 3.58E-112 | -0.742523789 | 0.367 | 0.634 | 8.64E-108 | 1.1 |
| RFWD2             | 6.94E-112 | -0.696720725 | 0.109 | 0.36  | 1.67E-107 | 1.1 |
| NAV2              | 7.27E-112 | 1.025821786  | 0.577 | 0.386 | 1.75E-107 | 1.1 |
| RP5-1198O         | 1.22E-111 | -0.824178284 | 0.015 | 0.21  | 2.94E-107 | 1.1 |
| ANKS1B            | 1.78E-111 | -0.819722769 | 0.093 | 0.336 | 4.30E-107 | 1.1 |
| LINC00152         | 8.04E-111 | 0.98549599   | 0.49  | 0.291 | 1.94E-106 | 1.1 |
| TAF1D             | 9.36E-111 | 0.823815698  | 0.478 | 0.267 | 2.26E-106 | 1.1 |
| FAAH2             | 1.51E-110 | -0.757513041 | 0.051 | 0.269 | 3.64E-106 | 1.1 |
| CFLAR             | 3.13E-110 | -0.774568689 | 0.266 | 0.543 | 7.56E-106 | 1.1 |
| FMN1              | 8.44E-110 | -0.739426533 | 0.022 | 0.221 | 2.04E-105 | 1.1 |
| HNRNPC            | 1.33E-109 | 0.628470432  | 0.866 | 0.784 | 3.22E-105 | 1.1 |
| PDE4B             | 2.46E-109 | 0.729710029  | 0.931 | 0.906 | 5.92E-105 | 1.1 |
| DOCK1             | 2.57E-109 | -0.723788123 | 0.117 | 0.367 | 6.20E-105 | 1.1 |
| CRYAB             | 6.82E-109 | 0.987728477  | 0.647 | 0.465 | 1.64E-104 | 1.1 |
| ARHGAP29          | 1.12E-108 | 1.26114021   | 0.605 | 0.439 | 2.71E-104 | 1.1 |
| RPL14             | 1.98E-108 | 0.460041985  | 0.99  | 0.978 | 4.78E-104 | 1.1 |
| RPL34             | 2.88E-108 | 0.335956714  | 0.996 | 0.98  | 6.94E-104 | 1.1 |
| PLEKHA7           | 6.72E-108 | 0.317438083  | 0.995 | 0.981 | 1.62E-103 | 1.1 |
| CYP24A1           | 5.71E-107 | -1.226259883 | 0.07  | 0.287 | 1.38E-102 | 1.1 |
| LRBA              | 6.59E-107 | -0.695836197 | 0.256 | 0.536 | 1.59E-102 | 1.1 |
| DDX5              | 2.08E-106 | -0.650774889 | 0.3   | 0.58  | 5.03E-102 | 1.1 |
| MYO1B             | 4.55E-106 | -0.797188338 | 0.149 | 0.398 | 1.10E-101 | 1.1 |
| PHLPP1            | 5.93E-106 | 0.938355177  | 0.586 | 0.414 | 1.43E-101 | 1.1 |
| TNFAIP8           | 7.16E-106 | -0.75191355  | 0.202 | 0.475 | 1.73E-101 | 1.1 |
| TACC1             | 1.94E-105 | -0.762177682 | 0.071 | 0.295 | 4.68E-101 | 1.1 |
| DDIT3             | 3.32E-105 | 0.875704761  | 0.246 | 0.082 | 8.01E-101 | 1.1 |
| C1QTNF3- <i>A</i> | 4.46E-105 | -0.69634858  | 0.056 | 0.275 | 1.07E-100 | 1.1 |
| DCHS2             | 6.29E-105 | -0.857517908 | 0.013 | 0.198 | 1.52E-100 | 1.1 |
| ROPN1             | 6.80E-105 | 0.519828076  | 0.16  | 0.033 | 1.64E-100 | 1.1 |
| RPL22             | 7.56E-105 | 0.580397737  | 0.843 | 0.777 | 1.82E-100 | 1.1 |
| SLC26A2           | 3.68E-104 | -0.843681469 | 0.021 | 0.211 | 8.88E-100 | 1.1 |
| ATP1A1            | 5.90E-104 | -0.662155645 | 0.312 | 0.583 | 1.42E-99  | 1.1 |
| HSD11B1           | 7.38E-104 | -0.849466733 | 0.047 | 0.251 | 1.78E-99  | 1.1 |
| RBM3              | 9.53E-104 | 0.719155965  | 0.627 | 0.459 | 2.30E-99  | 1.1 |
| CDC42BPA          | 4.62E-103 | -0.708562797 | 0.114 | 0.348 | 1.11E-98  | 1.1 |
| TNFSF10           | 7.84E-103 | -0.816149336 | 0.31  | 0.558 | 1.89E-98  | 1.1 |

|           |           |              |       |       |          |     |
|-----------|-----------|--------------|-------|-------|----------|-----|
| CCL20     | 2.86E-102 | -1.634191418 | 0.133 | 0.364 | 6.89E-98 | 1.1 |
| LINC01184 | 3.70E-102 | -0.702019261 | 0.063 | 0.276 | 8.91E-98 | 1.1 |
| PLEKHS1   | 5.89E-102 | -0.768709833 | 0.093 | 0.322 | 1.42E-97 | 1.1 |
| FNBP1     | 9.29E-102 | 0.895672707  | 0.606 | 0.444 | 2.24E-97 | 1.1 |
| BICD1     | 1.10E-101 | -0.745049149 | 0.045 | 0.248 | 2.66E-97 | 1.1 |
| NUP153    | 1.83E-101 | 0.824229624  | 0.414 | 0.218 | 4.41E-97 | 1.1 |
| MEAF6     | 5.98E-101 | 0.68354858   | 0.273 | 0.101 | 1.44E-96 | 1.1 |
| CCDC146   | 8.07E-101 | -0.7110387   | 0.04  | 0.239 | 1.95E-96 | 1.1 |
| DHCR24    | 3.28E-100 | -0.595305593 | 0.029 | 0.219 | 7.91E-96 | 1.1 |
| EIF3E     | 7.62E-100 | 0.566149462  | 0.842 | 0.783 | 1.84E-95 | 1.1 |
| PDZK1IP1  | 9.00E-100 | -0.894865482 | 0.032 | 0.222 | 2.17E-95 | 1.1 |
| PLPP3     | 2.59E-99  | -0.796070947 | 0.07  | 0.283 | 6.25E-95 | 1.1 |
| PPP2R2A   | 2.82E-99  | 0.778298977  | 0.546 | 0.361 | 6.81E-95 | 1.1 |
| RPS3A     | 4.78E-99  | 0.394674936  | 0.972 | 0.944 | 1.15E-94 | 1.1 |
| PNISR     | 1.08E-98  | -0.564176508 | 0.607 | 0.822 | 2.61E-94 | 1.1 |
| PTPRK     | 2.54E-98  | -0.558345569 | 0.536 | 0.782 | 6.13E-94 | 1.1 |
| ARID1B    | 2.80E-98  | -0.678948978 | 0.221 | 0.475 | 6.75E-94 | 1.1 |
| KCMF1     | 4.86E-98  | 0.857679561  | 0.441 | 0.253 | 1.17E-93 | 1.1 |
| SSBP2     | 5.20E-98  | 1.04573241   | 0.481 | 0.296 | 1.25E-93 | 1.1 |
| SKAP2     | 7.58E-98  | -0.665937949 | 0.148 | 0.387 | 1.83E-93 | 1.1 |
| RSL1D1    | 7.96E-98  | 0.696216634  | 0.705 | 0.603 | 1.92E-93 | 1.1 |
| STAG1     | 1.22E-97  | -0.628262313 | 0.282 | 0.553 | 2.95E-93 | 1.1 |
| CA8       | 1.24E-97  | -0.711410843 | 0.249 | 0.508 | 2.99E-93 | 1.1 |
| SGPP2     | 1.43E-97  | -0.690375745 | 0.047 | 0.244 | 3.44E-93 | 1.1 |
| NPEPPS    | 1.51E-97  | 0.916686828  | 0.576 | 0.408 | 3.65E-93 | 1.1 |
| MBD5      | 6.36E-97  | -0.668715778 | 0.101 | 0.326 | 1.53E-92 | 1.1 |
| S100A8    | 1.33E-96  | -3.030387863 | 0.071 | 0.269 | 3.20E-92 | 1.1 |
| SRSF5     | 1.64E-96  | -0.574557711 | 0.141 | 0.384 | 3.95E-92 | 1.1 |
| IFITM3    | 2.78E-96  | -0.82401387  | 0.098 | 0.311 | 6.71E-92 | 1.1 |
| DENND5A   | 8.51E-96  | 0.808957681  | 0.494 | 0.305 | 2.05E-91 | 1.1 |
| HK2       | 2.26E-95  | 0.771382722  | 0.298 | 0.126 | 5.46E-91 | 1.1 |
| EHBP1     | 1.13E-94  | -0.746195802 | 0.17  | 0.406 | 2.72E-90 | 1.1 |
| PLXDC2    | 1.34E-94  | -0.711525422 | 0.083 | 0.295 | 3.24E-90 | 1.1 |
| BACH2     | 1.78E-94  | 0.937482119  | 0.549 | 0.363 | 4.30E-90 | 1.1 |
| C4orf19   | 2.14E-94  | -0.694094252 | 0.047 | 0.239 | 5.15E-90 | 1.1 |
| CNTN4     | 2.82E-93  | -0.903979944 | 0.054 | 0.248 | 6.79E-89 | 1.1 |
| LRP6      | 2.82E-93  | 0.837746182  | 0.428 | 0.242 | 6.81E-89 | 1.1 |
| SAMD12    | 4.71E-93  | -0.712740174 | 0.1   | 0.321 | 1.14E-88 | 1.1 |
| B2M       | 6.38E-93  | -0.521847647 | 0.995 | 0.982 | 1.54E-88 | 1.1 |
| NOCT      | 2.03E-92  | 0.707585676  | 0.255 | 0.096 | 4.90E-88 | 1.1 |
| LRP1B     | 2.73E-92  | -1.448546833 | 0.062 | 0.257 | 6.58E-88 | 1.1 |
| ZNF518A   | 2.90E-92  | -0.631833301 | 0.047 | 0.237 | 6.99E-88 | 1.1 |
| BTF3      | 3.79E-92  | 0.548261539  | 0.957 | 0.942 | 9.13E-88 | 1.1 |
| FTH1      | 1.74E-91  | -0.686513192 | 0.802 | 0.901 | 4.20E-87 | 1.1 |
| RCAN1     | 2.48E-91  | -0.787068105 | 0.51  | 0.718 | 5.99E-87 | 1.1 |
| CTD-2015G | 3.66E-91  | -0.604957466 | 0.043 | 0.23  | 8.83E-87 | 1.1 |
| C11orf80  | 7.15E-91  | -0.62514377  | 0.07  | 0.272 | 1.72E-86 | 1.1 |

|          |          |              |       |       |          |     |
|----------|----------|--------------|-------|-------|----------|-----|
| RALGAPA2 | 9.90E-91 | -0.580911505 | 0.05  | 0.241 | 2.39E-86 | 1.1 |
| ADAMTS9- | 1.15E-90 | -0.691916978 | 0.152 | 0.381 | 2.77E-86 | 1.1 |
| NFIL3    | 1.32E-90 | 0.68110606   | 0.275 | 0.113 | 3.19E-86 | 1.1 |
| TPM1     | 2.61E-90 | -0.686809593 | 0.447 | 0.662 | 6.29E-86 | 1.1 |
| SIPA1L1  | 6.36E-90 | -0.63430268  | 0.18  | 0.42  | 1.53E-85 | 1.1 |
| SVIL     | 6.99E-90 | -0.568175667 | 0.72  | 0.876 | 1.69E-85 | 1.1 |
| FNBP1L   | 8.23E-90 | 0.8963115    | 0.55  | 0.393 | 1.98E-85 | 1.1 |
| SDCBP    | 1.03E-89 | -0.730197836 | 0.562 | 0.771 | 2.48E-85 | 1.1 |
| TRIM56   | 1.26E-89 | -0.62093413  | 0.06  | 0.255 | 3.03E-85 | 1.1 |
| SERAC1   | 4.35E-89 | 0.581567638  | 0.172 | 0.046 | 1.05E-84 | 1.1 |
| SRPK1    | 7.01E-89 | -0.610639869 | 0.403 | 0.646 | 1.69E-84 | 1.1 |
| ILF2     | 7.87E-89 | 0.691967661  | 0.664 | 0.525 | 1.90E-84 | 1.1 |
| ST8SIA1  | 1.18E-88 | -0.649721519 | 0.046 | 0.23  | 2.85E-84 | 1.1 |
| VMP1     | 3.55E-88 | -0.58545672  | 0.644 | 0.828 | 8.55E-84 | 1.1 |
| HELZ     | 4.97E-88 | 0.757719354  | 0.457 | 0.278 | 1.20E-83 | 1.1 |
| SLC9A7   | 1.31E-87 | 0.813467876  | 0.424 | 0.242 | 3.16E-83 | 1.1 |
| RSRP1    | 1.48E-87 | -0.588548818 | 0.094 | 0.306 | 3.57E-83 | 1.1 |
| PDLIM5   | 2.48E-87 | 0.574440658  | 0.876 | 0.825 | 5.98E-83 | 1.1 |
| RIOK3    | 2.72E-87 | 0.781327572  | 0.428 | 0.251 | 6.56E-83 | 1.1 |
| HSPA8    | 4.37E-87 | -0.808213549 | 0.401 | 0.608 | 1.05E-82 | 1.1 |
| SPDYE2   | 4.79E-87 | -0.535792555 | 0.053 | 0.239 | 1.15E-82 | 1.1 |
| VPS13D   | 7.44E-87 | -0.609766822 | 0.155 | 0.387 | 1.79E-82 | 1.1 |
| AKR1C1   | 8.25E-87 | -0.931526349 | 0.01  | 0.164 | 1.99E-82 | 1.1 |
| METTL17  | 5.06E-86 | 0.49042923   | 0.148 | 0.035 | 1.22E-81 | 1.1 |
| TSHZ2    | 5.17E-86 | -0.722811123 | 0.288 | 0.529 | 1.25E-81 | 1.1 |
| NFE2L2   | 1.75E-85 | -0.626271234 | 0.188 | 0.417 | 4.21E-81 | 1.1 |
| ANO10    | 9.98E-85 | -0.579462753 | 0.086 | 0.289 | 2.41E-80 | 1.1 |
| BTAF1    | 1.02E-84 | 0.745045412  | 0.376 | 0.2   | 2.47E-80 | 1.1 |
| THSD4    | 1.94E-84 | -0.724544153 | 0.242 | 0.479 | 4.68E-80 | 1.1 |
| BBX      | 2.52E-84 | -0.580476971 | 0.217 | 0.455 | 6.09E-80 | 1.1 |
| CMPK1    | 3.25E-84 | -0.599433396 | 0.152 | 0.379 | 7.84E-80 | 1.1 |
| RPL5     | 3.86E-84 | 0.382343448  | 0.986 | 0.97  | 9.30E-80 | 1.1 |
| ATG7     | 6.30E-84 | -0.573538756 | 0.078 | 0.274 | 1.52E-79 | 1.1 |
| PFDN5    | 7.14E-84 | 0.453689755  | 0.912 | 0.892 | 1.72E-79 | 1.1 |
| SORBS2   | 7.31E-84 | -0.738204496 | 0.41  | 0.639 | 1.76E-79 | 1.1 |
| RNF213   | 1.42E-83 | -0.555919858 | 0.049 | 0.229 | 3.43E-79 | 1.1 |
| ZNF521   | 1.74E-83 | -0.652496042 | 0.053 | 0.232 | 4.20E-79 | 1.1 |
| PTPRG    | 1.98E-83 | -0.704278451 | 0.084 | 0.281 | 4.77E-79 | 1.1 |
| SPG11    | 2.46E-83 | -0.581395106 | 0.126 | 0.343 | 5.93E-79 | 1.1 |
| MAP4K4   | 2.53E-83 | -0.632010616 | 0.183 | 0.414 | 6.10E-79 | 1.1 |
| SLC39A8  | 2.60E-83 | -0.722458218 | 0.029 | 0.193 | 6.28E-79 | 1.1 |
| ENOSF1   | 3.01E-83 | -0.610505285 | 0.08  | 0.272 | 7.26E-79 | 1.1 |
| RASGRP1  | 3.08E-83 | -0.566627924 | 0.021 | 0.181 | 7.42E-79 | 1.1 |
| APOO     | 2.09E-82 | 0.371372107  | 0.991 | 0.978 | 5.03E-78 | 1.1 |
| DENND2D  | 5.79E-82 | -0.490589432 | 0.02  | 0.176 | 1.40E-77 | 1.1 |
| YTHDC1   | 6.72E-82 | 0.704195846  | 0.411 | 0.236 | 1.62E-77 | 1.1 |
| WEE1     | 1.09E-81 | 0.686715374  | 0.397 | 0.218 | 2.63E-77 | 1.1 |



|           |          |              |       |       |          |     |
|-----------|----------|--------------|-------|-------|----------|-----|
| LTBP1     | 1.09E-81 | -0.721567221 | 0.084 | 0.276 | 2.63E-77 | 1.1 |
| KDM5B     | 1.39E-81 | 0.729782045  | 0.635 | 0.531 | 3.36E-77 | 1.1 |
| RPSA      | 1.69E-81 | 0.533489316  | 0.932 | 0.917 | 4.07E-77 | 1.1 |
| NEDD9     | 3.14E-81 | 0.821004963  | 0.395 | 0.226 | 7.57E-77 | 1.1 |
| FBXL17    | 3.71E-81 | -0.641494172 | 0.055 | 0.234 | 8.94E-77 | 1.1 |
| CFB       | 1.46E-80 | -0.557027962 | 0.021 | 0.177 | 3.53E-76 | 1.1 |
| GRHL2     | 1.47E-80 | -0.586474118 | 0.123 | 0.33  | 3.56E-76 | 1.1 |
| FDFT1     | 3.84E-80 | -0.702700938 | 0.182 | 0.395 | 9.27E-76 | 1.1 |
| MAP3K13   | 4.30E-80 | -0.4644371   | 0.7   | 0.876 | 1.04E-75 | 1.1 |
| ZBTB38    | 7.53E-80 | -0.621288407 | 0.163 | 0.377 | 1.81E-75 | 1.1 |
| ELL2      | 8.94E-80 | 0.684159157  | 0.757 | 0.654 | 2.16E-75 | 1.1 |
| ESYT2     | 1.32E-79 | 0.78017528   | 0.614 | 0.474 | 3.19E-75 | 1.1 |
| ZNF638    | 1.79E-79 | -0.564233143 | 0.252 | 0.485 | 4.32E-75 | 1.1 |
| NFAT5     | 4.38E-79 | 0.640371016  | 0.705 | 0.598 | 1.06E-74 | 1.1 |
| DIAPH2    | 8.37E-79 | -0.646367311 | 0.124 | 0.328 | 2.02E-74 | 1.1 |
| ATF7IP    | 1.05E-78 | -0.556677521 | 0.048 | 0.22  | 2.52E-74 | 1.1 |
| ARHGAP17  | 1.30E-78 | 0.76559444   | 0.338 | 0.175 | 3.14E-74 | 1.1 |
| PARP4     | 1.33E-78 | -0.547581188 | 0.064 | 0.243 | 3.21E-74 | 1.1 |
| CXCL1     | 1.39E-78 | -0.809398936 | 0.108 | 0.303 | 3.35E-74 | 1.1 |
| HGSNAT    | 1.78E-78 | -0.555595973 | 0.045 | 0.212 | 4.30E-74 | 1.1 |
| SEC24D    | 1.94E-78 | 0.813029175  | 0.423 | 0.255 | 4.68E-74 | 1.1 |
| BTBD9     | 2.15E-78 | -0.623467532 | 0.066 | 0.245 | 5.19E-74 | 1.1 |
| CXCL8     | 5.44E-78 | -2.250741358 | 0.212 | 0.41  | 1.31E-73 | 1.1 |
| ARHGAP44  | 5.85E-78 | -0.556100822 | 0.097 | 0.295 | 1.41E-73 | 1.1 |
| ST6GALNAI | 6.25E-78 | -0.739366174 | 0.224 | 0.447 | 1.51E-73 | 1.1 |
| GPRC5A    | 7.47E-78 | 1.119328789  | 0.46  | 0.307 | 1.80E-73 | 1.1 |
| STRN      | 8.86E-78 | 0.759125192  | 0.513 | 0.356 | 2.14E-73 | 1.1 |
| CXCL17    | 8.88E-78 | -0.864524842 | 0.058 | 0.229 | 2.14E-73 | 1.1 |
| CHPT1     | 2.51E-77 | -0.9041861   | 0.235 | 0.442 | 6.05E-73 | 1.1 |
| RPS27A    | 2.54E-77 | 0.315548306  | 0.994 | 0.982 | 6.13E-73 | 1.1 |
| PDZRN3    | 2.62E-77 | -0.656951403 | 0.059 | 0.232 | 6.33E-73 | 1.1 |
| SEMA6A    | 2.73E-77 | -0.685973544 | 0.245 | 0.475 | 6.59E-73 | 1.1 |
| HIVEP3    | 3.18E-77 | -0.762149781 | 0.163 | 0.375 | 7.68E-73 | 1.1 |
| SHROOM3   | 3.51E-77 | 0.76446001   | 0.619 | 0.488 | 8.47E-73 | 1.1 |
| GABPB1-AS | 3.98E-77 | -0.499955238 | 0.069 | 0.251 | 9.60E-73 | 1.1 |
| SEMA6A-AS | 5.13E-77 | -0.62753119  | 0.106 | 0.306 | 1.24E-72 | 1.1 |
| NR2F2-AS1 | 5.40E-77 | -0.588025374 | 0.028 | 0.182 | 1.30E-72 | 1.1 |
| RTN4      | 1.45E-76 | 0.630271395  | 0.711 | 0.597 | 3.50E-72 | 1.1 |
| CRIM1     | 1.95E-76 | 0.732195333  | 0.611 | 0.464 | 4.71E-72 | 1.1 |
| RPS27L    | 1.45E-75 | -0.662139179 | 0.374 | 0.585 | 3.50E-71 | 1.1 |
| ANKIB1    | 1.73E-75 | -0.52085071  | 0.163 | 0.375 | 4.17E-71 | 1.1 |
| LDHB      | 3.12E-75 | 0.563556878  | 0.788 | 0.736 | 7.52E-71 | 1.1 |
| RPL4      | 3.70E-75 | 0.428459616  | 0.967 | 0.954 | 8.93E-71 | 1.1 |
| NFIB      | 4.02E-75 | -0.474019899 | 0.755 | 0.886 | 9.70E-71 | 1.1 |
| STIM1     | 6.86E-75 | -0.560361488 | 0.076 | 0.255 | 1.65E-70 | 1.1 |
| TCF12     | 1.46E-74 | -0.502018425 | 0.324 | 0.56  | 3.53E-70 | 1.1 |
| ARL15     | 2.25E-74 | -0.55998098  | 0.076 | 0.257 | 5.41E-70 | 1.1 |

|         |          |              |       |       |          |     |
|---------|----------|--------------|-------|-------|----------|-----|
| TRABD2B | 6.49E-74 | -0.632328855 | 0.007 | 0.14  | 1.57E-69 | 1.1 |
| USP54   | 1.01E-73 | 0.872483269  | 0.607 | 0.48  | 2.43E-69 | 1.1 |
| RPL7A   | 1.46E-73 | 0.405728136  | 0.986 | 0.972 | 3.52E-69 | 1.1 |
| TXNRD1  | 1.47E-73 | -0.80633819  | 0.246 | 0.463 | 3.54E-69 | 1.1 |
| IRF2BPL | 1.94E-73 | -0.470899948 | 0.022 | 0.167 | 4.68E-69 | 1.1 |
| PRKD1   | 2.26E-73 | -0.613624907 | 0.045 | 0.205 | 5.44E-69 | 1.1 |
| IFI16   | 4.11E-73 | -0.54572801  | 0.13  | 0.328 | 9.90E-69 | 1.1 |
| XKR6    | 4.48E-73 | -0.568183239 | 0.053 | 0.217 | 1.08E-68 | 1.1 |
| OTUD7B  | 1.31E-72 | 0.653672522  | 0.279 | 0.129 | 3.16E-68 | 1.1 |
| ZNF33A  | 1.42E-72 | -0.508277744 | 0.109 | 0.3   | 3.42E-68 | 1.1 |
| RPL21   | 1.59E-72 | 0.34032329   | 0.976 | 0.952 | 3.84E-68 | 1.1 |
| UGGT2   | 2.24E-72 | -0.584878959 | 0.052 | 0.215 | 5.40E-68 | 1.1 |
| JMJD1C  | 2.94E-72 | 0.652393098  | 0.736 | 0.658 | 7.10E-68 | 1.1 |
| MAPK14  | 3.66E-72 | -0.49885966  | 0.056 | 0.222 | 8.84E-68 | 1.1 |
| LDHA    | 4.88E-72 | 0.820185197  | 0.761 | 0.704 | 1.18E-67 | 1.1 |
| TRAPPC9 | 6.87E-72 | -0.559478184 | 0.056 | 0.222 | 1.66E-67 | 1.1 |
| KLHL5   | 1.31E-71 | -0.514939986 | 0.056 | 0.221 | 3.17E-67 | 1.1 |
| PLEKHA6 | 4.86E-71 | 0.37610727   | 0.942 | 0.917 | 1.17E-66 | 1.1 |
| SRSF3   | 4.93E-71 | 0.553829016  | 0.703 | 0.562 | 1.19E-66 | 1.1 |
| PRKCE   | 8.77E-71 | -0.638222635 | 0.078 | 0.251 | 2.12E-66 | 1.1 |
| ATR     | 1.92E-70 | -0.492215798 | 0.05  | 0.211 | 4.63E-66 | 1.1 |
| LAMC2   | 2.42E-70 | -0.69248635  | 0.151 | 0.346 | 5.83E-66 | 1.1 |
| KPNA1   | 4.92E-70 | 0.728124628  | 0.387 | 0.23  | 1.19E-65 | 1.1 |
| TULP4   | 5.70E-70 | 0.734763635  | 0.59  | 0.462 | 1.37E-65 | 1.1 |
| SLC47A1 | 1.10E-69 | 0.329557239  | 0.972 | 0.937 | 2.66E-65 | 1.1 |
| PTPRJ   | 1.47E-69 | 0.728557716  | 0.438 | 0.28  | 3.54E-65 | 1.1 |
| COA1    | 1.72E-69 | -0.516804443 | 0.132 | 0.324 | 4.15E-65 | 1.1 |
| ARID5B  | 1.82E-69 | 0.626688867  | 0.791 | 0.729 | 4.39E-65 | 1.1 |
| CCSER1  | 1.95E-69 | -0.493080944 | 0.357 | 0.588 | 4.69E-65 | 1.1 |
| MAML3   | 2.54E-69 | -0.614820484 | 0.108 | 0.29  | 6.12E-65 | 1.1 |
| GCNT2   | 3.92E-69 | -0.579859405 | 0.209 | 0.42  | 9.45E-65 | 1.1 |
| MCPH1   | 7.96E-69 | -0.485194244 | 0.052 | 0.21  | 1.92E-64 | 1.1 |
| ATP1B1  | 9.13E-69 | -0.926251089 | 0.598 | 0.752 | 2.20E-64 | 1.1 |
| GLRX    | 9.28E-69 | -0.506137996 | 0.33  | 0.559 | 2.24E-64 | 1.1 |
| NSD1    | 9.72E-69 | -0.473383042 | 0.038 | 0.187 | 2.34E-64 | 1.1 |
| CDH1    | 1.10E-68 | 0.641853139  | 0.618 | 0.48  | 2.66E-64 | 1.1 |
| EIF4A2  | 1.14E-68 | 0.460312962  | 0.862 | 0.796 | 2.75E-64 | 1.1 |
| SIK3    | 1.61E-68 | 0.325678358  | 0.99  | 0.982 | 3.88E-64 | 1.1 |
| DYRK1A  | 2.10E-68 | 0.732700786  | 0.468 | 0.319 | 5.05E-64 | 1.1 |
| SLC30A4 | 2.67E-68 | -0.489816844 | 0.026 | 0.167 | 6.43E-64 | 1.1 |
| ZC3H12C | 3.46E-68 | -0.54168729  | 0.088 | 0.263 | 8.35E-64 | 1.1 |
| GPATCH8 | 5.63E-68 | -0.50601932  | 0.12  | 0.305 | 1.36E-63 | 1.1 |
| SMYD3   | 1.29E-67 | -0.65883353  | 0.102 | 0.277 | 3.11E-63 | 1.1 |
| SMS     | 1.45E-67 | 0.871126034  | 0.493 | 0.353 | 3.50E-63 | 1.1 |
| CAMK1D  | 2.82E-67 | 0.709375964  | 0.252 | 0.113 | 6.79E-63 | 1.1 |
| EIF4E2  | 2.96E-67 | -0.48650042  | 0.243 | 0.454 | 7.14E-63 | 1.1 |
| GLIPR2  | 4.45E-67 | -0.476093848 | 0.026 | 0.163 | 1.07E-62 | 1.1 |

|           |          |              |       |       |          |     |
|-----------|----------|--------------|-------|-------|----------|-----|
| ALOX5     | 4.93E-67 | -0.48336964  | 0.03  | 0.17  | 1.19E-62 | 1.1 |
| JARID2    | 6.81E-67 | -0.617778183 | 0.121 | 0.303 | 1.64E-62 | 1.1 |
| CDK13     | 8.24E-67 | -0.502148234 | 0.197 | 0.404 | 1.99E-62 | 1.1 |
| FAM49B    | 1.48E-66 | -0.500783134 | 0.107 | 0.285 | 3.58E-62 | 1.1 |
| CEPT1     | 2.01E-66 | -0.501981513 | 0.144 | 0.337 | 4.86E-62 | 1.1 |
| CX3CL1    | 2.57E-66 | -0.664115325 | 0.13  | 0.315 | 6.19E-62 | 1.1 |
| SLCO3A1   | 2.67E-66 | -0.530410201 | 0.117 | 0.303 | 6.44E-62 | 1.1 |
| PCBP1     | 3.25E-66 | 0.674794657  | 0.56  | 0.45  | 7.85E-62 | 1.1 |
| NOS1AP    | 3.73E-66 | -0.6362128   | 0.049 | 0.2   | 9.00E-62 | 1.1 |
| NT5C2     | 4.08E-66 | -0.487063214 | 0.219 | 0.431 | 9.84E-62 | 1.1 |
| BRE       | 4.69E-66 | -0.573324038 | 0.06  | 0.214 | 1.13E-61 | 1.1 |
| ZFP36L2   | 5.87E-66 | 0.906669383  | 0.476 | 0.322 | 1.42E-61 | 1.1 |
| BACH1     | 6.60E-66 | -0.538560993 | 0.161 | 0.358 | 1.59E-61 | 1.1 |
| RP11-123O | 7.04E-66 | -0.526745096 | 0.09  | 0.261 | 1.70E-61 | 1.1 |
| C4orf3    | 7.76E-66 | 0.676367301  | 0.694 | 0.601 | 1.87E-61 | 1.1 |
| THBS1     | 1.37E-65 | 0.595013303  | 0.151 | 0.046 | 3.30E-61 | 1.1 |
| PRELID1   | 1.52E-65 | -0.452273018 | 0.036 | 0.179 | 3.66E-61 | 1.1 |
| CLEC7A    | 2.85E-65 | -0.461236774 | 0.028 | 0.164 | 6.86E-61 | 1.1 |
| JPX       | 3.20E-65 | -0.548234349 | 0.129 | 0.306 | 7.70E-61 | 1.1 |
| MORF4L2   | 3.22E-65 | 0.48211467   | 0.795 | 0.728 | 7.77E-61 | 1.1 |
| GSAP      | 8.56E-65 | -0.479002715 | 0.045 | 0.191 | 2.06E-60 | 1.1 |
| CCDC91    | 8.59E-65 | -0.462931647 | 0.203 | 0.411 | 2.07E-60 | 1.1 |
| CCAR1     | 9.37E-65 | -0.497603953 | 0.124 | 0.303 | 2.26E-60 | 1.1 |
| PACS1     | 1.06E-64 | -0.505009372 | 0.16  | 0.352 | 2.55E-60 | 1.1 |
| PBX1      | 1.46E-64 | -0.643872713 | 0.1   | 0.268 | 3.53E-60 | 1.1 |
| NAPG      | 1.67E-64 | -0.445504891 | 0.073 | 0.234 | 4.04E-60 | 1.1 |
| CNN3      | 2.05E-64 | 0.726809516  | 0.557 | 0.428 | 4.95E-60 | 1.1 |
| SRGAP2    | 3.27E-64 | -0.430633488 | 0.022 | 0.151 | 7.89E-60 | 1.1 |
| GLUL      | 3.67E-64 | -0.626938031 | 0.182 | 0.376 | 8.84E-60 | 1.1 |
| LINC00969 | 3.92E-64 | -0.409915695 | 0.135 | 0.32  | 9.45E-60 | 1.1 |
| CBR4      | 5.01E-64 | -0.456205422 | 0.129 | 0.315 | 1.21E-59 | 1.1 |
| ASS1      | 5.52E-64 | -0.511251008 | 0.051 | 0.199 | 1.33E-59 | 1.1 |
| MEF2A     | 6.75E-64 | 0.788694927  | 0.488 | 0.352 | 1.63E-59 | 1.1 |
| NUTM2A-A  | 7.00E-64 | -0.455160512 | 0.137 | 0.328 | 1.69E-59 | 1.1 |
| HDAC8     | 8.02E-64 | -0.477946592 | 0.099 | 0.273 | 1.93E-59 | 1.1 |
| CCDC6     | 2.36E-63 | 0.717148056  | 0.449 | 0.302 | 5.68E-59 | 1.1 |
| SERPINB4  | 7.09E-63 | -1.33316587  | 0.01  | 0.127 | 1.71E-58 | 1.1 |
| CUX1      | 1.80E-62 | -0.484648738 | 0.103 | 0.273 | 4.33E-58 | 1.1 |
| RANBP17   | 2.58E-62 | -0.538738872 | 0.063 | 0.216 | 6.22E-58 | 1.1 |
| SLC25A3   | 5.30E-62 | -0.468272451 | 0.078 | 0.239 | 1.28E-57 | 1.1 |
| S100B     | 5.49E-62 | 0.411926887  | 0.117 | 0.029 | 1.32E-57 | 1.1 |
| BAIAP2L1  | 7.26E-62 | 0.563416759  | 0.978 | 0.963 | 1.75E-57 | 1.1 |
| NDUFS5    | 8.54E-62 | 0.409626689  | 0.866 | 0.823 | 2.06E-57 | 1.1 |
| CPD       | 9.80E-62 | -0.529022759 | 0.098 | 0.265 | 2.36E-57 | 1.1 |
| FKBP5     | 1.07E-61 | -0.584171088 | 0.145 | 0.331 | 2.59E-57 | 1.1 |
| LINC01138 | 1.15E-61 | -0.47749882  | 0.105 | 0.276 | 2.78E-57 | 1.1 |
| GNE       | 1.21E-61 | -0.490983417 | 0.065 | 0.218 | 2.92E-57 | 1.1 |

|           |          |              |       |       |          |     |
|-----------|----------|--------------|-------|-------|----------|-----|
| ZKSCAN1   | 1.88E-61 | -0.485624789 | 0.133 | 0.312 | 4.54E-57 | 1.1 |
| RABGAP1L  | 3.65E-61 | -0.524808061 | 0.103 | 0.272 | 8.81E-57 | 1.1 |
| SSH2      | 4.19E-61 | -0.543191962 | 0.197 | 0.389 | 1.01E-56 | 1.1 |
| KIAA0319L | 5.29E-61 | -0.487945551 | 0.056 | 0.203 | 1.28E-56 | 1.1 |
| MGST3     | 8.78E-61 | -0.524485142 | 0.346 | 0.546 | 2.12E-56 | 1.1 |
| HERC1     | 8.81E-61 | 0.749747391  | 0.487 | 0.359 | 2.12E-56 | 1.1 |
| TPCN1     | 1.06E-60 | -0.492568779 | 0.027 | 0.154 | 2.56E-56 | 1.1 |
| DISC1     | 1.44E-60 | -0.427236276 | 0.015 | 0.134 | 3.47E-56 | 1.1 |
| EEF1B2    | 1.44E-60 | 0.539453161  | 0.897 | 0.878 | 3.48E-56 | 1.1 |
| ST3GAL1   | 1.68E-60 | -0.427583982 | 0.078 | 0.235 | 4.04E-56 | 1.1 |
| UVRAG     | 1.75E-60 | -0.461595465 | 0.261 | 0.473 | 4.21E-56 | 1.1 |
| ADAMTS9   | 1.90E-60 | -0.858766936 | 0.304 | 0.485 | 4.59E-56 | 1.1 |
| S100A6    | 2.20E-60 | -0.912806508 | 0.313 | 0.521 | 5.30E-56 | 1.1 |
| CDR2      | 2.60E-60 | -0.457240817 | 0.039 | 0.176 | 6.26E-56 | 1.1 |
| LRRC49    | 9.78E-60 | -0.480351703 | 0.03  | 0.158 | 2.36E-55 | 1.1 |
| VTI1A     | 1.05E-59 | -0.482674826 | 0.06  | 0.207 | 2.53E-55 | 1.1 |
| ANKRD36   | 1.16E-59 | -0.551211203 | 0.043 | 0.18  | 2.80E-55 | 1.1 |
| RAPGEF2   | 1.33E-59 | 0.73888436   | 0.506 | 0.371 | 3.21E-55 | 1.1 |
| PDIA3     | 1.48E-59 | 0.684309398  | 0.378 | 0.232 | 3.56E-55 | 1.1 |
| SNX24     | 1.53E-59 | -0.440960923 | 0.089 | 0.249 | 3.70E-55 | 1.1 |
| IFNAR2    | 3.67E-59 | -0.471509616 | 0.166 | 0.352 | 8.86E-55 | 1.1 |
| SAA4      | 4.36E-59 | -0.367812339 | 0.14  | 0.328 | 1.05E-54 | 1.1 |
| SLC24A3   | 5.38E-59 | -0.482542258 | 0.056 | 0.2   | 1.30E-54 | 1.1 |
| OOEP      | 6.62E-59 | 0.270809186  | 0.994 | 0.976 | 1.60E-54 | 1.1 |
| SCMH1     | 7.05E-59 | -0.532280966 | 0.097 | 0.259 | 1.70E-54 | 1.1 |
| BTG1      | 7.88E-59 | -0.591600889 | 0.328 | 0.519 | 1.90E-54 | 1.1 |
| ACTN1     | 1.27E-58 | 0.726584266  | 0.386 | 0.236 | 3.07E-54 | 1.1 |
| MYO1D     | 1.66E-58 | -0.494097191 | 0.137 | 0.314 | 4.00E-54 | 1.1 |
| PODXL     | 2.25E-58 | -0.462783945 | 0.076 | 0.229 | 5.43E-54 | 1.1 |
| RP11-290O | 3.54E-58 | -0.565321772 | 0.013 | 0.126 | 8.54E-54 | 1.1 |
| TGM2      | 4.01E-58 | -0.35171901  | 0.01  | 0.12  | 9.67E-54 | 1.1 |
| CBX1      | 5.21E-58 | 0.562124551  | 0.232 | 0.108 | 1.26E-53 | 1.1 |
| PTPRE     | 6.54E-58 | -0.427067947 | 0.035 | 0.165 | 1.58E-53 | 1.1 |
| CLLU1OS   | 7.12E-58 | -0.38924523  | 0.01  | 0.119 | 1.72E-53 | 1.1 |
| RPL38     | 7.71E-58 | 0.322199934  | 0.935 | 0.925 | 1.86E-53 | 1.1 |
| SERPINA3  | 7.98E-58 | -0.671216058 | 0.099 | 0.261 | 1.92E-53 | 1.1 |
| NSF       | 8.10E-58 | -0.470046353 | 0.055 | 0.194 | 1.95E-53 | 1.1 |
| AC15954O  | 9.83E-58 | -0.628444057 | 0.068 | 0.213 | 2.37E-53 | 1.1 |
| SERPINB3  | 1.47E-57 | -1.175278711 | 0.007 | 0.112 | 3.56E-53 | 1.1 |
| MORC3     | 1.90E-57 | 0.60523982   | 0.328 | 0.188 | 4.59E-53 | 1.1 |
| MAP2K5    | 2.53E-57 | -0.445327793 | 0.033 | 0.161 | 6.09E-53 | 1.1 |
| CHD2      | 4.08E-57 | 0.62793837   | 0.533 | 0.395 | 9.84E-53 | 1.1 |
| MTUS1     | 4.29E-57 | 0.670482159  | 0.473 | 0.333 | 1.04E-52 | 1.1 |
| C10orf90  | 5.13E-57 | -0.441179519 | 0.024 | 0.143 | 1.24E-52 | 1.1 |
| RNF130    | 5.25E-57 | -0.434085294 | 0.058 | 0.199 | 1.27E-52 | 1.1 |
| PHLDA1    | 6.61E-57 | -0.458249576 | 0.066 | 0.21  | 1.59E-52 | 1.1 |
| EHF       | 9.29E-57 | 0.675505872  | 0.661 | 0.575 | 2.24E-52 | 1.1 |

|           |          |              |       |       |          |     |
|-----------|----------|--------------|-------|-------|----------|-----|
| HIST1H2AC | 1.08E-56 | -0.533253199 | 0.185 | 0.367 | 2.60E-52 | 1.1 |
| VAMP8     | 1.38E-56 | -0.441567729 | 0.59  | 0.739 | 3.34E-52 | 1.1 |
| SAMD4A    | 1.45E-56 | -0.489091904 | 0.503 | 0.691 | 3.50E-52 | 1.1 |
| TTC17     | 1.46E-56 | -0.48073184  | 0.154 | 0.331 | 3.53E-52 | 1.1 |
| CAPZA1    | 1.56E-56 | -0.429942649 | 0.297 | 0.5   | 3.76E-52 | 1.1 |
| AFTPH     | 3.68E-56 | 0.609188939  | 0.419 | 0.277 | 8.87E-52 | 1.1 |
| HELB      | 3.77E-56 | -0.414504771 | 0.03  | 0.155 | 9.09E-52 | 1.1 |
| RPL10     | 3.79E-56 | 0.566824728  | 0.977 | 0.96  | 9.13E-52 | 1.1 |
| UQCRB     | 4.05E-56 | 0.413490443  | 0.853 | 0.818 | 9.76E-52 | 1.1 |
| ATP1B3    | 4.14E-56 | -0.467916146 | 0.143 | 0.313 | 9.99E-52 | 1.1 |
| DENND1A   | 4.57E-56 | -0.442741168 | 0.1   | 0.26  | 1.10E-51 | 1.1 |
| C1S       | 4.87E-56 | -0.376286009 | 0.027 | 0.148 | 1.17E-51 | 1.1 |
| RAP1GAP2  | 4.95E-56 | -0.515126303 | 0.063 | 0.205 | 1.19E-51 | 1.1 |
| PDK1      | 5.22E-56 | 0.556359131  | 0.204 | 0.088 | 1.26E-51 | 1.1 |
| C1RL      | 5.75E-56 | -0.434484708 | 0.031 | 0.154 | 1.39E-51 | 1.1 |
| FDCSP     | 7.00E-56 | -3.106280471 | 0.1   | 0.243 | 1.69E-51 | 1.1 |
| SERTAD2   | 7.11E-56 | 0.636730966  | 0.305 | 0.169 | 1.71E-51 | 1.1 |
| SENP5     | 8.15E-56 | -0.450547251 | 0.093 | 0.248 | 1.97E-51 | 1.1 |
| MOB4      | 8.16E-56 | -0.387125034 | 0.084 | 0.239 | 1.97E-51 | 1.1 |
| IER3      | 1.34E-55 | -0.55130499  | 0.049 | 0.182 | 3.22E-51 | 1.1 |
| MYCBP2    | 1.35E-55 | -0.459336385 | 0.068 | 0.21  | 3.26E-51 | 1.1 |
| NUP107    | 2.59E-55 | -0.405921007 | 0.053 | 0.19  | 6.26E-51 | 1.1 |
| RNF13     | 2.65E-55 | -0.450832844 | 0.168 | 0.347 | 6.38E-51 | 1.1 |
| RPL27     | 3.15E-55 | 0.280082791  | 0.97  | 0.949 | 7.59E-51 | 1.1 |
| TPST1     | 3.50E-55 | -0.53118728  | 0.048 | 0.181 | 8.44E-51 | 1.1 |
| ANKRD36B  | 3.92E-55 | -0.492038074 | 0.03  | 0.149 | 9.44E-51 | 1.1 |
| HDAC9     | 4.24E-55 | -0.512417511 | 0.116 | 0.277 | 1.02E-50 | 1.1 |
| PAM       | 5.43E-55 | -0.374615162 | 0.42  | 0.643 | 1.31E-50 | 1.1 |
| DLEU2     | 6.63E-55 | -0.46898265  | 0.081 | 0.228 | 1.60E-50 | 1.1 |
| PKP4      | 9.90E-55 | -0.436186997 | 0.291 | 0.492 | 2.39E-50 | 1.1 |
| BAZ2B     | 1.04E-54 | -0.431633196 | 0.295 | 0.494 | 2.51E-50 | 1.1 |
| CCL28     | 1.05E-54 | -0.698372532 | 0.609 | 0.742 | 2.53E-50 | 1.1 |
| SLC20A2   | 1.15E-54 | 0.633013673  | 0.489 | 0.349 | 2.78E-50 | 1.1 |
| GBP3      | 1.65E-54 | -0.450052924 | 0.06  | 0.197 | 3.97E-50 | 1.1 |
| DAPL1     | 1.65E-54 | 0.382160929  | 0.108 | 0.029 | 3.97E-50 | 1.1 |
| CSTB      | 2.08E-54 | -0.586156022 | 0.082 | 0.226 | 5.03E-50 | 1.1 |
| CACNB2    | 2.16E-54 | -0.490078428 | 0.048 | 0.178 | 5.22E-50 | 1.1 |
| NBEA      | 3.06E-54 | -0.484356338 | 0.025 | 0.141 | 7.37E-50 | 1.1 |
| R3HDM2    | 3.32E-54 | -0.453659381 | 0.054 | 0.188 | 8.00E-50 | 1.1 |
| SDC4      | 3.62E-54 | -0.532521981 | 0.287 | 0.486 | 8.72E-50 | 1.1 |
| ZNF254    | 4.03E-54 | -0.395386032 | 0.06  | 0.197 | 9.72E-50 | 1.1 |
| SEL1L     | 4.47E-54 | 0.500216261  | 0.167 | 0.064 | 1.08E-49 | 1.1 |
| KIT       | 4.53E-54 | -0.515765171 | 0.228 | 0.417 | 1.09E-49 | 1.1 |
| SGMS2     | 8.48E-54 | 0.565464659  | 0.276 | 0.143 | 2.04E-49 | 1.1 |
| MGP       | 1.05E-53 | 1.170616169  | 0.893 | 0.86  | 2.52E-49 | 1.1 |
| GSK3B     | 1.13E-53 | -0.453090215 | 0.167 | 0.343 | 2.71E-49 | 1.1 |
| RAD51B    | 1.32E-53 | -0.536406197 | 0.11  | 0.266 | 3.19E-49 | 1.1 |

|           |          |              |       |       |          |     |
|-----------|----------|--------------|-------|-------|----------|-----|
| RP11-142C | 1.34E-53 | -0.455378495 | 0.033 | 0.153 | 3.24E-49 | 1.1 |
| EIF4E     | 1.42E-53 | 0.592555769  | 0.482 | 0.349 | 3.42E-49 | 1.1 |
| SKP1      | 1.46E-53 | 0.408259732  | 0.874 | 0.825 | 3.51E-49 | 1.1 |
| KIAA1551  | 2.26E-53 | -0.386687085 | 0.041 | 0.166 | 5.44E-49 | 1.1 |
| WDR70     | 4.29E-53 | -0.41422324  | 0.04  | 0.164 | 1.03E-48 | 1.1 |
| ZNF608    | 5.87E-53 | -0.437834295 | 0.064 | 0.202 | 1.41E-48 | 1.1 |
| C10orf10  | 6.64E-53 | -0.443301923 | 0.087 | 0.236 | 1.60E-48 | 1.1 |
| INVS      | 7.01E-53 | -0.439623724 | 0.041 | 0.166 | 1.69E-48 | 1.1 |
| C5orf28   | 9.62E-53 | -0.425289771 | 0.076 | 0.218 | 2.32E-48 | 1.1 |
| RP4-678D1 | 1.06E-52 | -0.434889811 | 0.059 | 0.197 | 2.56E-48 | 1.1 |
| SPINK5    | 2.37E-52 | 0.372394341  | 0.057 | 0.006 | 5.71E-48 | 1.1 |
| PHF21A    | 2.61E-52 | -0.444692769 | 0.126 | 0.287 | 6.29E-48 | 1.1 |
| RP11-536O | 4.00E-52 | -0.425710107 | 0.033 | 0.15  | 9.64E-48 | 1.1 |
| SLC2A1    | 4.37E-52 | 0.480636014  | 0.15  | 0.054 | 1.05E-47 | 1.1 |
| UBAC2     | 7.34E-52 | -0.436236973 | 0.103 | 0.253 | 1.77E-47 | 1.1 |
| C14orf119 | 1.19E-51 | -0.408415204 | 0.089 | 0.234 | 2.88E-47 | 1.1 |
| RPL24     | 1.23E-51 | 0.282238399  | 0.975 | 0.946 | 2.97E-47 | 1.1 |
| PPP1R9A   | 1.35E-51 | -0.490893947 | 0.098 | 0.245 | 3.24E-47 | 1.1 |
| SIPA1L3   | 1.74E-51 | -0.484224945 | 0.076 | 0.217 | 4.19E-47 | 1.1 |
| FBXO32    | 1.92E-51 | -0.684720351 | 0.283 | 0.462 | 4.63E-47 | 1.1 |
| RBM6      | 2.12E-51 | -0.444357867 | 0.198 | 0.38  | 5.10E-47 | 1.1 |
| GNG12     | 2.28E-51 | 0.635064534  | 0.4   | 0.27  | 5.51E-47 | 1.1 |
| BRINP1    | 2.38E-51 | -0.557259971 | 0.093 | 0.24  | 5.74E-47 | 1.1 |
| TACSTD2   | 2.46E-51 | -0.370538305 | 0.578 | 0.772 | 5.92E-47 | 1.1 |
| MAGED1    | 5.15E-51 | -0.365313449 | 0.026 | 0.139 | 1.24E-46 | 1.1 |
| ARHGEF3   | 5.46E-51 | -0.363911176 | 0.18  | 0.357 | 1.32E-46 | 1.1 |
| CYP1B1    | 5.54E-51 | -0.50587192  | 0.038 | 0.157 | 1.34E-46 | 1.1 |
| ATP6VOE1  | 6.14E-51 | -0.392817508 | 0.541 | 0.712 | 1.48E-46 | 1.1 |
| FRMD6     | 6.92E-51 | 0.628835706  | 0.29  | 0.162 | 1.67E-46 | 1.1 |
| RP11-114H | 7.11E-51 | -0.711269131 | 0.084 | 0.222 | 1.71E-46 | 1.1 |
| OXSR1     | 9.95E-51 | 0.574234601  | 0.332 | 0.198 | 2.40E-46 | 1.1 |
| FAF2      | 1.97E-50 | -0.382459555 | 0.072 | 0.208 | 4.74E-46 | 1.1 |
| CMTM8     | 2.10E-50 | -0.454349489 | 0.09  | 0.234 | 5.07E-46 | 1.1 |
| HSD17B7   | 2.60E-50 | -0.412381076 | 0.032 | 0.146 | 6.27E-46 | 1.1 |
| FRK       | 2.96E-50 | -0.407694239 | 0.068 | 0.202 | 7.14E-46 | 1.1 |
| KRT6B     | 2.97E-50 | -0.577981428 | 0.035 | 0.151 | 7.16E-46 | 1.1 |
| SMIM14    | 2.99E-50 | -0.404144583 | 0.061 | 0.191 | 7.21E-46 | 1.1 |
| ZNF143    | 3.97E-50 | 0.50195075   | 0.237 | 0.118 | 9.58E-46 | 1.1 |
| KCTD3     | 4.63E-50 | 0.600546767  | 0.293 | 0.167 | 1.12E-45 | 1.1 |
| CTSS      | 4.64E-50 | -0.47900236  | 0.147 | 0.306 | 1.12E-45 | 1.1 |
| UQCRH     | 4.85E-50 | 0.423285153  | 0.863 | 0.851 | 1.17E-45 | 1.1 |
| BMPR1A    | 5.70E-50 | -0.416411571 | 0.16  | 0.329 | 1.37E-45 | 1.1 |
| LRIG1     | 5.76E-50 | -0.502555105 | 0.13  | 0.287 | 1.39E-45 | 1.1 |
| UBR5      | 6.17E-50 | 0.570813051  | 0.5   | 0.376 | 1.49E-45 | 1.1 |
| MT-ND6    | 6.28E-50 | -0.389951687 | 0.065 | 0.197 | 1.51E-45 | 1.1 |
| FER       | 6.31E-50 | -0.397344001 | 0.102 | 0.254 | 1.52E-45 | 1.1 |
| ASCC1     | 7.32E-50 | -0.38874652  | 0.072 | 0.208 | 1.76E-45 | 1.1 |

|           |          |              |       |       |          |     |
|-----------|----------|--------------|-------|-------|----------|-----|
| SPDYE16   | 1.19E-49 | -0.348591762 | 0.021 | 0.126 | 2.88E-45 | 1.1 |
| GMDS-AS1  | 1.80E-49 | -0.472136973 | 0.033 | 0.147 | 4.35E-45 | 1.1 |
| BCAP29    | 2.22E-49 | -0.436239588 | 0.063 | 0.191 | 5.35E-45 | 1.1 |
| ZNF544    | 2.41E-49 | -0.339158172 | 0.022 | 0.128 | 5.80E-45 | 1.1 |
| PDSS2     | 2.54E-49 | -0.404375577 | 0.047 | 0.169 | 6.13E-45 | 1.1 |
| TBC1D22A  | 2.64E-49 | -0.412463256 | 0.043 | 0.163 | 6.37E-45 | 1.1 |
| CASC4     | 2.97E-49 | -0.380567103 | 0.082 | 0.222 | 7.17E-45 | 1.1 |
| WIPI1     | 3.08E-49 | -0.378654433 | 0.068 | 0.203 | 7.42E-45 | 1.1 |
| EVI5      | 3.37E-49 | -0.419062095 | 0.048 | 0.17  | 8.12E-45 | 1.1 |
| LRR37A3   | 3.81E-49 | -0.357971701 | 0.038 | 0.153 | 9.18E-45 | 1.1 |
| PHF14     | 3.90E-49 | -0.423239584 | 0.054 | 0.178 | 9.41E-45 | 1.1 |
| TPD52L1   | 4.42E-49 | -0.469434209 | 0.116 | 0.265 | 1.06E-44 | 1.1 |
| CLIC6     | 4.53E-49 | -0.373238587 | 0.029 | 0.139 | 1.09E-44 | 1.1 |
| MKL2      | 5.86E-49 | -0.421494047 | 0.142 | 0.302 | 1.41E-44 | 1.1 |
| ZBTB8OS   | 8.28E-49 | -0.337336531 | 0.048 | 0.17  | 2.00E-44 | 1.1 |
| UBAP1     | 1.30E-48 | 0.569956038  | 0.431 | 0.302 | 3.13E-44 | 1.1 |
| GANC      | 1.32E-48 | -0.367429406 | 0.026 | 0.133 | 3.18E-44 | 1.1 |
| CRTC3     | 1.66E-48 | -0.446125477 | 0.144 | 0.299 | 4.01E-44 | 1.1 |
| AKR1C2    | 2.15E-48 | -0.402365858 | 0.009 | 0.101 | 5.18E-44 | 1.1 |
| MRPL13    | 2.27E-48 | -0.385730317 | 0.08  | 0.216 | 5.46E-44 | 1.1 |
| GCLM      | 2.42E-48 | -0.433475934 | 0.062 | 0.19  | 5.83E-44 | 1.1 |
| MED31     | 2.48E-48 | -0.357152982 | 0.088 | 0.227 | 5.97E-44 | 1.1 |
| BMPR2     | 2.69E-48 | -0.398751407 | 0.122 | 0.275 | 6.49E-44 | 1.1 |
| SNRPD2    | 2.79E-48 | 0.470502557  | 0.761 | 0.739 | 6.72E-44 | 1.1 |
| HDGF      | 2.90E-48 | -0.41152444  | 0.148 | 0.306 | 6.98E-44 | 1.1 |
| RABGAP1   | 2.92E-48 | -0.392595798 | 0.178 | 0.348 | 7.05E-44 | 1.1 |
| FAF1      | 3.28E-48 | -0.467497033 | 0.154 | 0.312 | 7.90E-44 | 1.1 |
| NF1       | 4.35E-48 | -0.388915085 | 0.314 | 0.508 | 1.05E-43 | 1.1 |
| ZCCHC17   | 4.73E-48 | -0.368954781 | 0.185 | 0.358 | 1.14E-43 | 1.1 |
| DAPK2     | 6.22E-48 | 0.671648733  | 0.527 | 0.417 | 1.50E-43 | 1.1 |
| TTC39C    | 6.31E-48 | -0.394750651 | 0.046 | 0.166 | 1.52E-43 | 1.1 |
| OTUD6B-A  | 6.54E-48 | -0.339627659 | 0.092 | 0.237 | 1.58E-43 | 1.1 |
| HIVEP1    | 1.01E-47 | -0.393507974 | 0.065 | 0.194 | 2.44E-43 | 1.1 |
| FOXN3     | 1.03E-47 | -0.463176303 | 0.125 | 0.272 | 2.47E-43 | 1.1 |
| UBE2V2    | 1.42E-47 | -0.349275055 | 0.165 | 0.334 | 3.42E-43 | 1.1 |
| R3HCC1L   | 2.43E-47 | -0.362639429 | 0.041 | 0.157 | 5.86E-43 | 1.1 |
| UST       | 2.90E-47 | -0.518437493 | 0.136 | 0.287 | 7.00E-43 | 1.1 |
| JAK2      | 3.22E-47 | -0.490419225 | 0.013 | 0.108 | 7.77E-43 | 1.1 |
| MECOM     | 3.29E-47 | 0.347998708  | 0.904 | 0.883 | 7.92E-43 | 1.1 |
| SYNJ2     | 3.50E-47 | -0.449890109 | 0.189 | 0.356 | 8.45E-43 | 1.1 |
| FAM114A1  | 5.31E-47 | -0.365019289 | 0.058 | 0.182 | 1.28E-42 | 1.1 |
| AC026202  | 6.20E-47 | 0.605916394  | 0.286 | 0.164 | 1.50E-42 | 1.1 |
| FAM63B    | 6.90E-47 | -0.368807121 | 0.046 | 0.162 | 1.66E-42 | 1.1 |
| RSRC1     | 7.42E-47 | -0.388736571 | 0.143 | 0.298 | 1.79E-42 | 1.1 |
| USP34     | 8.20E-47 | -0.374827091 | 0.44  | 0.637 | 1.98E-42 | 1.1 |
| SLC16A1-A | 9.91E-47 | -0.390879357 | 0.034 | 0.143 | 2.39E-42 | 1.1 |
| VPS13C    | 1.03E-46 | -0.406725948 | 0.112 | 0.259 | 2.47E-42 | 1.1 |

|           |          |              |       |       |          |     |
|-----------|----------|--------------|-------|-------|----------|-----|
| GJC3      | 1.08E-46 | 0.439747668  | 0.153 | 0.061 | 2.60E-42 | 1.1 |
| EIF3L     | 1.43E-46 | 0.405206986  | 0.792 | 0.751 | 3.44E-42 | 1.1 |
| OTUD3     | 1.43E-46 | 0.343651389  | 0.101 | 0.029 | 3.45E-42 | 1.1 |
| RP11-83A2 | 1.56E-46 | -0.349923785 | 0.037 | 0.149 | 3.75E-42 | 1.1 |
| TMCC1     | 1.67E-46 | -0.416143493 | 0.16  | 0.319 | 4.02E-42 | 1.1 |
| SERPINB1  | 1.88E-46 | -0.371662682 | 0.028 | 0.133 | 4.54E-42 | 1.1 |
| GADD45A   | 1.96E-46 | 0.702369104  | 0.322 | 0.2   | 4.72E-42 | 1.1 |
| SOX10     | 2.37E-46 | -0.415528591 | 0.044 | 0.158 | 5.71E-42 | 1.1 |
| LRRC16A   | 2.58E-46 | -0.431152039 | 0.082 | 0.212 | 6.23E-42 | 1.1 |
| SWAP70    | 3.01E-46 | 0.602571874  | 0.396 | 0.271 | 7.25E-42 | 1.1 |
| PTPRM     | 3.41E-46 | -0.592462011 | 0.079 | 0.208 | 8.23E-42 | 1.1 |
| SUMF1     | 3.49E-46 | -0.422115268 | 0.036 | 0.145 | 8.43E-42 | 1.1 |
| GNAQ      | 3.65E-46 | -0.41955525  | 0.191 | 0.357 | 8.80E-42 | 1.1 |
| FOSL2     | 3.68E-46 | -0.377720872 | 0.083 | 0.216 | 8.87E-42 | 1.1 |
| RBX1      | 4.93E-46 | -0.370121239 | 0.317 | 0.503 | 1.19E-41 | 1.1 |
| PDXK      | 4.98E-46 | -0.41333988  | 0.068 | 0.194 | 1.20E-41 | 1.1 |
| ZNF43     | 5.09E-46 | -0.373827493 | 0.054 | 0.173 | 1.23E-41 | 1.1 |
| SUPT3H    | 5.57E-46 | -0.408711809 | 0.066 | 0.193 | 1.34E-41 | 1.1 |
| EYA2      | 5.71E-46 | -0.441529048 | 0.102 | 0.241 | 1.38E-41 | 1.1 |
| FAM20C    | 8.27E-46 | -0.458452901 | 0.026 | 0.128 | 1.99E-41 | 1.1 |
| PHKB      | 1.02E-45 | -0.386641945 | 0.096 | 0.233 | 2.46E-41 | 1.1 |
| ADAM10    | 1.03E-45 | -0.382363428 | 0.13  | 0.281 | 2.49E-41 | 1.1 |
| TTLL5     | 1.13E-45 | -0.389447673 | 0.079 | 0.21  | 2.74E-41 | 1.1 |
| LINC01152 | 1.36E-45 | -0.511319496 | 0.043 | 0.155 | 3.28E-41 | 1.1 |
| APEX1     | 1.53E-45 | 0.557506429  | 0.348 | 0.227 | 3.70E-41 | 1.1 |
| CLIP2     | 1.62E-45 | -0.436744292 | 0.089 | 0.223 | 3.91E-41 | 1.1 |
| WFDC3     | 1.70E-45 | -0.330264087 | 0.028 | 0.132 | 4.10E-41 | 1.1 |
| C1R       | 1.78E-45 | -0.342623554 | 0.01  | 0.1   | 4.30E-41 | 1.1 |
| ADK       | 1.81E-45 | -0.478896603 | 0.325 | 0.504 | 4.37E-41 | 1.1 |
| SLMAP     | 2.20E-45 | 0.52813908   | 0.678 | 0.613 | 5.31E-41 | 1.1 |
| MINK1     | 2.66E-45 | -0.391821477 | 0.055 | 0.173 | 6.40E-41 | 1.1 |
| DGKH      | 2.69E-45 | -0.392170317 | 0.066 | 0.191 | 6.49E-41 | 1.1 |
| CYP27A1   | 2.84E-45 | -0.323466922 | 0.014 | 0.107 | 6.84E-41 | 1.1 |
| UBE2E3    | 3.11E-45 | -0.40139959  | 0.08  | 0.21  | 7.51E-41 | 1.1 |
| RELB      | 3.13E-45 | -0.411090665 | 0.062 | 0.182 | 7.54E-41 | 1.1 |
| ADM       | 3.19E-45 | 0.251218537  | 0.063 | 0.011 | 7.70E-41 | 1.1 |
| ABLIM1    | 3.20E-45 | -0.437840949 | 0.152 | 0.303 | 7.71E-41 | 1.1 |
| TMEM87B   | 4.74E-45 | -0.336344494 | 0.018 | 0.112 | 1.14E-40 | 1.1 |
| NNMT      | 5.34E-45 | -0.4736973   | 0.015 | 0.108 | 1.29E-40 | 1.1 |
| MMP7      | 6.00E-45 | -0.560097557 | 0.196 | 0.354 | 1.45E-40 | 1.1 |
| GALNT15   | 7.28E-45 | -0.644294585 | 0.058 | 0.174 | 1.75E-40 | 1.1 |
| RP11-449D | 8.83E-45 | -0.428430213 | 0.018 | 0.113 | 2.13E-40 | 1.1 |
| C11orf54  | 9.12E-45 | -0.308381174 | 0.026 | 0.127 | 2.20E-40 | 1.1 |
| DAPP1     | 1.09E-44 | -0.391506126 | 0.277 | 0.462 | 2.64E-40 | 1.1 |
| CYCS      | 1.13E-44 | 0.527937208  | 0.624 | 0.515 | 2.72E-40 | 1.1 |
| DOCK7     | 1.41E-44 | -0.434886728 | 0.135 | 0.282 | 3.40E-40 | 1.1 |
| STOX2     | 1.71E-44 | -0.393721837 | 0.083 | 0.213 | 4.14E-40 | 1.1 |



|         |          |              |       |       |          |     |
|---------|----------|--------------|-------|-------|----------|-----|
| TIMM9   | 1.86E-44 | 0.517022993  | 0.307 | 0.19  | 4.50E-40 | 1.1 |
| GGPS1   | 1.98E-44 | -0.361824078 | 0.101 | 0.239 | 4.78E-40 | 1.1 |
| SMARCA2 | 2.37E-44 | -0.415056635 | 0.184 | 0.344 | 5.71E-40 | 1.1 |
| SEC62   | 3.63E-44 | 0.544021703  | 0.679 | 0.606 | 8.76E-40 | 1.1 |
| GCC2    | 3.67E-44 | -0.402911533 | 0.206 | 0.37  | 8.85E-40 | 1.1 |
| TATDN1  | 4.31E-44 | 0.516726211  | 0.397 | 0.277 | 1.04E-39 | 1.1 |
| NFATC2  | 5.10E-44 | 0.595031393  | 0.226 | 0.117 | 1.23E-39 | 1.1 |
| HERPUD1 | 5.64E-44 | 0.551257348  | 0.284 | 0.164 | 1.36E-39 | 1.1 |
| CLU     | 6.01E-44 | -0.682620215 | 0.034 | 0.138 | 1.45E-39 | 1.1 |
| FBXL20  | 6.70E-44 | -0.378894974 | 0.143 | 0.295 | 1.61E-39 | 1.1 |
| SFRP1   | 9.12E-44 | -0.449194033 | 0.33  | 0.507 | 2.20E-39 | 1.1 |
| ARPP19  | 9.26E-44 | 0.558217939  | 0.421 | 0.302 | 2.23E-39 | 1.1 |
| GPD2    | 1.02E-43 | -0.35372079  | 0.132 | 0.28  | 2.47E-39 | 1.1 |
| FANCC   | 1.31E-43 | -0.327806628 | 0.046 | 0.159 | 3.16E-39 | 1.1 |
| TTLL4   | 1.60E-43 | -0.360800263 | 0.077 | 0.204 | 3.85E-39 | 1.1 |
| PPTC7   | 1.76E-43 | 0.61245078   | 0.306 | 0.185 | 4.24E-39 | 1.1 |
| RARRES3 | 2.12E-43 | 0.587379791  | 0.406 | 0.284 | 5.11E-39 | 1.1 |
| CD2AP   | 2.16E-43 | 0.694144422  | 0.466 | 0.355 | 5.20E-39 | 1.1 |
| RPRD2   | 2.17E-43 | -0.383598841 | 0.063 | 0.181 | 5.23E-39 | 1.1 |
| ELF3    | 2.44E-43 | 0.638547488  | 0.605 | 0.513 | 5.88E-39 | 1.1 |
| TBCK    | 2.86E-43 | -0.376234022 | 0.045 | 0.155 | 6.89E-39 | 1.1 |
| SLC35E3 | 3.09E-43 | -0.325654725 | 0.025 | 0.123 | 7.44E-39 | 1.1 |
| ZRANB2  | 3.19E-43 | -0.387452226 | 0.218 | 0.383 | 7.70E-39 | 1.1 |
| ARF4    | 3.36E-43 | 0.456737727  | 0.702 | 0.635 | 8.10E-39 | 1.1 |
| MFGE8   | 3.61E-43 | -0.714184039 | 0.094 | 0.221 | 8.72E-39 | 1.1 |
| DYNLL1  | 3.99E-43 | 0.560368855  | 0.32  | 0.199 | 9.61E-39 | 1.1 |
| RANBP2  | 4.23E-43 | 0.540422858  | 0.366 | 0.245 | 1.02E-38 | 1.1 |
| FOXO1   | 4.57E-43 | -0.37952572  | 0.143 | 0.29  | 1.10E-38 | 1.1 |
| IRAK2   | 4.82E-43 | -0.382623261 | 0.056 | 0.172 | 1.16E-38 | 1.1 |
| TBL1X   | 6.47E-43 | -0.374079671 | 0.074 | 0.198 | 1.56E-38 | 1.1 |
| FCHSD2  | 6.71E-43 | -0.345295661 | 0.032 | 0.134 | 1.62E-38 | 1.1 |
| SREBF2  | 7.89E-43 | -0.373014466 | 0.236 | 0.406 | 1.90E-38 | 1.1 |
| PCCA    | 8.44E-43 | -0.381598089 | 0.07  | 0.192 | 2.04E-38 | 1.1 |
| CDK14   | 9.65E-43 | -0.389492381 | 0.274 | 0.45  | 2.33E-38 | 1.1 |
| GNA13   | 1.06E-42 | 0.520958832  | 0.286 | 0.167 | 2.55E-38 | 1.1 |
| CPEB4   | 1.19E-42 | -0.350516864 | 0.087 | 0.217 | 2.87E-38 | 1.1 |
| PAPSS1  | 1.21E-42 | -0.399599024 | 0.254 | 0.42  | 2.92E-38 | 1.1 |
| PCNXL4  | 1.21E-42 | -0.315767621 | 0.028 | 0.127 | 2.93E-38 | 1.1 |
| S100A10 | 1.31E-42 | -0.493181408 | 0.191 | 0.351 | 3.15E-38 | 1.1 |
| CEBPB   | 1.36E-42 | -0.345410909 | 0.06  | 0.177 | 3.27E-38 | 1.1 |
| PKD2    | 1.61E-42 | -0.335768441 | 0.018 | 0.109 | 3.88E-38 | 1.1 |
| MARCO   | 1.73E-42 | -0.394352998 | 0.028 | 0.125 | 4.17E-38 | 1.1 |
| SCAPER  | 1.89E-42 | -0.419305171 | 0.12  | 0.256 | 4.55E-38 | 1.1 |
| UACA    | 2.15E-42 | -0.391106308 | 0.076 | 0.199 | 5.18E-38 | 1.1 |
| RAI14   | 2.31E-42 | 0.58525962   | 0.253 | 0.141 | 5.56E-38 | 1.1 |
| ELOVL6  | 2.60E-42 | -0.354604132 | 0.017 | 0.107 | 6.27E-38 | 1.1 |
| NLK     | 2.98E-42 | -0.341511872 | 0.03  | 0.129 | 7.20E-38 | 1.1 |

|           |          |              |       |       |          |     |
|-----------|----------|--------------|-------|-------|----------|-----|
| SUB1      | 3.45E-42 | -0.39182556  | 0.67  | 0.784 | 8.32E-38 | 1.1 |
| APP       | 4.25E-42 | -0.410960702 | 0.671 | 0.806 | 1.02E-37 | 1.1 |
| LDHC      | 4.63E-42 | 0.297782823  | 0.064 | 0.012 | 1.12E-37 | 1.1 |
| STXBPS    | 4.99E-42 | -0.316188627 | 0.026 | 0.122 | 1.20E-37 | 1.1 |
| KRIT1     | 5.34E-42 | -0.336348998 | 0.043 | 0.151 | 1.29E-37 | 1.1 |
| CLASP2    | 5.50E-42 | -0.363590249 | 0.128 | 0.27  | 1.33E-37 | 1.1 |
| TMCO4     | 6.27E-42 | -0.323296324 | 0.027 | 0.123 | 1.51E-37 | 1.1 |
| TGOLN2    | 6.90E-42 | -0.318811522 | 0.037 | 0.139 | 1.66E-37 | 1.1 |
| PARD3     | 9.19E-42 | -0.346649176 | 0.517 | 0.692 | 2.22E-37 | 1.1 |
| LDLRAD4   | 1.00E-41 | -0.458297317 | 0.082 | 0.207 | 2.42E-37 | 1.1 |
| S100A9    | 1.01E-41 | -0.908600574 | 0.008 | 0.089 | 2.44E-37 | 1.1 |
| SS18      | 1.15E-41 | -0.340148487 | 0.063 | 0.18  | 2.78E-37 | 1.1 |
| BCL2L14   | 1.20E-41 | 0.444294519  | 0.226 | 0.119 | 2.89E-37 | 1.1 |
| MYO1E     | 1.34E-41 | -0.436428962 | 0.357 | 0.535 | 3.24E-37 | 1.1 |
| PITPNA    | 1.37E-41 | -0.354884487 | 0.059 | 0.173 | 3.31E-37 | 1.1 |
| PLD1      | 1.47E-41 | -0.321344449 | 0.028 | 0.123 | 3.55E-37 | 1.1 |
| AGFG1     | 1.66E-41 | 0.578780671  | 0.486 | 0.381 | 4.01E-37 | 1.1 |
| SH3GL1    | 1.68E-41 | 0.402666055  | 0.155 | 0.066 | 4.05E-37 | 1.1 |
| CASP7     | 2.06E-41 | -0.327755765 | 0.076 | 0.198 | 4.97E-37 | 1.1 |
| MBP       | 2.09E-41 | -0.361621389 | 0.084 | 0.209 | 5.03E-37 | 1.1 |
| WWP1      | 2.49E-41 | -0.335038217 | 0.094 | 0.224 | 6.00E-37 | 1.1 |
| APLF      | 2.85E-41 | -0.312253748 | 0.018 | 0.107 | 6.88E-37 | 1.1 |
| NFIC      | 3.08E-41 | -0.36114163  | 0.082 | 0.206 | 7.44E-37 | 1.1 |
| S100A14   | 4.78E-41 | -0.41438626  | 0.56  | 0.705 | 1.15E-36 | 1.1 |
| CAMKMT    | 4.85E-41 | -0.412658929 | 0.074 | 0.194 | 1.17E-36 | 1.1 |
| HERC4     | 4.90E-41 | -0.342858738 | 0.261 | 0.441 | 1.18E-36 | 1.1 |
| GPHN      | 5.31E-41 | -0.35283122  | 0.178 | 0.335 | 1.28E-36 | 1.1 |
| ARNTL2    | 7.15E-41 | -0.382228213 | 0.055 | 0.165 | 1.72E-36 | 1.1 |
| EXOC6B    | 7.26E-41 | -0.344828038 | 0.098 | 0.228 | 1.75E-36 | 1.1 |
| METTL15   | 8.42E-41 | -0.3652478   | 0.051 | 0.16  | 2.03E-36 | 1.1 |
| CHD9      | 1.31E-40 | -0.324648391 | 0.334 | 0.518 | 3.15E-36 | 1.1 |
| RSU1      | 1.37E-40 | -0.394783314 | 0.102 | 0.231 | 3.31E-36 | 1.1 |
| SAP18     | 1.57E-40 | 0.435885525  | 0.652 | 0.586 | 3.80E-36 | 1.1 |
| MOB3B     | 1.94E-40 | -0.340047994 | 0.139 | 0.282 | 4.67E-36 | 1.1 |
| PUM2      | 2.67E-40 | 0.545879639  | 0.437 | 0.327 | 6.44E-36 | 1.1 |
| ZNF124    | 2.75E-40 | -0.302922416 | 0.023 | 0.113 | 6.63E-36 | 1.1 |
| ASH1L     | 2.92E-40 | -0.351489679 | 0.368 | 0.546 | 7.04E-36 | 1.1 |
| NR2C2     | 3.14E-40 | -0.342286567 | 0.057 | 0.167 | 7.56E-36 | 1.1 |
| EDN1      | 3.16E-40 | 0.590069192  | 0.299 | 0.182 | 7.61E-36 | 1.1 |
| TAPBP     | 3.29E-40 | -0.36095163  | 0.047 | 0.152 | 7.93E-36 | 1.1 |
| FXR1      | 3.38E-40 | 0.511996916  | 0.501 | 0.401 | 8.16E-36 | 1.1 |
| EIF2A     | 3.48E-40 | 0.499281019  | 0.502 | 0.409 | 8.39E-36 | 1.1 |
| GTF2IRD2  | 3.78E-40 | -0.308935253 | 0.024 | 0.115 | 9.12E-36 | 1.1 |
| NFATC3    | 4.16E-40 | -0.342745526 | 0.073 | 0.191 | 1.00E-35 | 1.1 |
| RP1-28O10 | 4.36E-40 | -0.272869955 | 0.008 | 0.086 | 1.05E-35 | 1.1 |
| HSD17B12  | 4.52E-40 | -0.383768072 | 0.113 | 0.245 | 1.09E-35 | 1.1 |
| INTS10    | 5.65E-40 | -0.319999899 | 0.038 | 0.138 | 1.36E-35 | 1.1 |

|            |          |              |       |       |          |     |
|------------|----------|--------------|-------|-------|----------|-----|
| GS1-114I9. | 9.38E-40 | -0.303863796 | 0.048 | 0.155 | 2.26E-35 | 1.1 |
| PTPRA      | 9.46E-40 | -0.357052762 | 0.067 | 0.181 | 2.28E-35 | 1.1 |
| ANXA7      | 1.06E-39 | -0.35190467  | 0.184 | 0.334 | 2.57E-35 | 1.1 |
| RGL1       | 1.21E-39 | -0.335757073 | 0.025 | 0.116 | 2.93E-35 | 1.1 |
| C6orf62    | 1.53E-39 | -0.290705817 | 0.085 | 0.207 | 3.70E-35 | 1.1 |
| TBC1D1     | 1.93E-39 | -0.372662133 | 0.098 | 0.225 | 4.66E-35 | 1.1 |
| EIF3K      | 2.17E-39 | 0.594208921  | 0.528 | 0.454 | 5.22E-35 | 1.1 |
| RHBDD1     | 2.43E-39 | -0.319577777 | 0.049 | 0.155 | 5.85E-35 | 1.1 |
| SMG6       | 2.96E-39 | -0.369685356 | 0.074 | 0.19  | 7.14E-35 | 1.1 |
| INTS12     | 3.03E-39 | 0.519436491  | 0.274 | 0.164 | 7.30E-35 | 1.1 |
| AVL9       | 3.37E-39 | -0.345822542 | 0.09  | 0.214 | 8.13E-35 | 1.1 |
| PARP14     | 4.62E-39 | -0.341877294 | 0.071 | 0.185 | 1.11E-34 | 1.1 |
| RP11-84A1  | 4.72E-39 | 0.282848559  | 0.086 | 0.025 | 1.14E-34 | 1.1 |
| RPS17      | 5.97E-39 | 0.212607414  | 0.979 | 0.958 | 1.44E-34 | 1.1 |
| CLOCK      | 6.15E-39 | -0.338662613 | 0.095 | 0.221 | 1.48E-34 | 1.1 |
| CUL5       | 6.94E-39 | -0.327543369 | 0.056 | 0.162 | 1.67E-34 | 1.1 |
| SYTL2      | 7.68E-39 | -0.315319487 | 0.062 | 0.173 | 1.85E-34 | 1.1 |
| TNIP3      | 8.46E-39 | -0.307262361 | 0.017 | 0.1   | 2.04E-34 | 1.1 |
| IDH2       | 8.76E-39 | -0.308489592 | 0.023 | 0.111 | 2.11E-34 | 1.1 |
| GLUD1      | 9.30E-39 | 0.564307012  | 0.241 | 0.135 | 2.24E-34 | 1.1 |
| ENPP6      | 9.46E-39 | -0.257252973 | 0.001 | 0.069 | 2.28E-34 | 1.1 |
| AKR1B1     | 1.10E-38 | -0.410125379 | 0.013 | 0.092 | 2.66E-34 | 1.1 |
| CYFIP1     | 1.22E-38 | -0.350075516 | 0.048 | 0.151 | 2.95E-34 | 1.1 |
| SLC30A7    | 1.24E-38 | -0.311053712 | 0.044 | 0.146 | 2.99E-34 | 1.1 |
| ZNF429     | 1.33E-38 | -0.27477491  | 0.019 | 0.104 | 3.21E-34 | 1.1 |
| LRSAM1     | 1.35E-38 | -0.323216576 | 0.043 | 0.142 | 3.25E-34 | 1.1 |
| AHCYL1     | 1.70E-38 | -0.336588745 | 0.175 | 0.322 | 4.09E-34 | 1.1 |
| NALCN      | 2.20E-38 | -0.37367041  | 0.071 | 0.184 | 5.31E-34 | 1.1 |
| ZNF91      | 2.39E-38 | -0.324999741 | 0.065 | 0.176 | 5.77E-34 | 1.1 |
| PIP5K1A    | 2.79E-38 | 0.525296006  | 0.385 | 0.275 | 6.73E-34 | 1.1 |
| ZC3HAV1    | 3.00E-38 | -0.296150845 | 0.041 | 0.14  | 7.24E-34 | 1.1 |
| ERBB2IP    | 3.06E-38 | -0.370784877 | 0.167 | 0.31  | 7.39E-34 | 1.1 |
| VPS13B     | 3.31E-38 | -0.335310048 | 0.079 | 0.197 | 7.97E-34 | 1.1 |
| ATRNL1     | 3.40E-38 | -0.367526932 | 0.017 | 0.1   | 8.19E-34 | 1.1 |
| ZNF397     | 3.58E-38 | -0.306041272 | 0.043 | 0.141 | 8.62E-34 | 1.1 |
| AEBP2      | 3.61E-38 | -0.392268573 | 0.143 | 0.28  | 8.71E-34 | 1.1 |
| NIN        | 3.65E-38 | -0.284630467 | 0.033 | 0.128 | 8.81E-34 | 1.1 |
| UMAD1      | 3.82E-38 | -0.3408162   | 0.039 | 0.136 | 9.20E-34 | 1.1 |
| TFCP2      | 4.15E-38 | -0.317873832 | 0.058 | 0.165 | 1.00E-33 | 1.1 |
| RPS3       | 4.21E-38 | 0.609112506  | 0.927 | 0.927 | 1.01E-33 | 1.1 |
| CNIH4      | 4.31E-38 | -0.340006239 | 0.265 | 0.424 | 1.04E-33 | 1.1 |
| LITAF      | 4.83E-38 | -0.329545787 | 0.368 | 0.544 | 1.16E-33 | 1.1 |
| B4GALT1    | 4.95E-38 | -0.383918875 | 0.285 | 0.447 | 1.19E-33 | 1.1 |
| ZNF708     | 5.01E-38 | -0.333065353 | 0.025 | 0.114 | 1.21E-33 | 1.1 |
| DPYSL2     | 5.62E-38 | -0.315545079 | 0.05  | 0.154 | 1.35E-33 | 1.1 |
| ANKRD37    | 6.78E-38 | 0.330572436  | 0.12  | 0.046 | 1.63E-33 | 1.1 |
| FAM120B    | 7.04E-38 | -0.294129973 | 0.041 | 0.139 | 1.70E-33 | 1.1 |

|          |          |              |       |       |          |     |
|----------|----------|--------------|-------|-------|----------|-----|
| TSG101   | 7.40E-38 | -0.311528851 | 0.088 | 0.209 | 1.78E-33 | 1.1 |
| RGS10    | 7.69E-38 | -0.331684125 | 0.046 | 0.146 | 1.85E-33 | 1.1 |
| AFF4     | 7.99E-38 | 0.516164062  | 0.499 | 0.405 | 1.93E-33 | 1.1 |
| CEP350   | 8.51E-38 | -0.342100033 | 0.104 | 0.228 | 2.05E-33 | 1.1 |
| TFG      | 8.90E-38 | 0.53614745   | 0.391 | 0.283 | 2.15E-33 | 1.1 |
| RFX3     | 9.08E-38 | -0.358274292 | 0.077 | 0.191 | 2.19E-33 | 1.1 |
| DNAJB6   | 1.08E-37 | 0.596787552  | 0.428 | 0.323 | 2.61E-33 | 1.1 |
| MYRFL    | 1.10E-37 | -0.299280602 | 0.015 | 0.095 | 2.65E-33 | 1.1 |
| PUM1     | 1.24E-37 | 0.488775885  | 0.57  | 0.493 | 2.99E-33 | 1.1 |
| CXCL16   | 1.32E-37 | -0.310457455 | 0.106 | 0.233 | 3.17E-33 | 1.1 |
| DMKN     | 1.63E-37 | -0.296488833 | 0.039 | 0.135 | 3.93E-33 | 1.1 |
| C16orf72 | 1.67E-37 | 0.415103536  | 0.218 | 0.117 | 4.03E-33 | 1.1 |
| NIPAL3   | 1.79E-37 | -0.305360225 | 0.018 | 0.101 | 4.32E-33 | 1.1 |
| MCTP2    | 1.93E-37 | -0.352199418 | 0.068 | 0.179 | 4.66E-33 | 1.1 |
| PDE8A    | 1.96E-37 | -0.380017257 | 0.351 | 0.52  | 4.73E-33 | 1.1 |
| COPS2    | 2.11E-37 | 0.467495737  | 0.433 | 0.326 | 5.10E-33 | 1.1 |
| LAMB3    | 2.51E-37 | -0.332868052 | 0.177 | 0.329 | 6.06E-33 | 1.1 |
| IPO7     | 2.68E-37 | 0.509626111  | 0.371 | 0.261 | 6.46E-33 | 1.1 |
| NBR1     | 2.83E-37 | -0.323687337 | 0.085 | 0.202 | 6.82E-33 | 1.1 |
| IGF2BP2  | 3.06E-37 | 0.675947888  | 0.563 | 0.492 | 7.39E-33 | 1.1 |
| CATSPERB | 3.79E-37 | -0.255003013 | 0.142 | 0.284 | 9.13E-33 | 1.1 |
| LDLR     | 4.18E-37 | -0.384428435 | 0.083 | 0.199 | 1.01E-32 | 1.1 |
| PARD3B   | 4.44E-37 | -0.330503031 | 0.055 | 0.159 | 1.07E-32 | 1.1 |
| CDH3     | 5.09E-37 | -0.350113574 | 0.068 | 0.176 | 1.23E-32 | 1.1 |
| CALM1    | 5.13E-37 | -0.375078129 | 0.133 | 0.264 | 1.24E-32 | 1.1 |
| ANXA3    | 5.32E-37 | -0.460894415 | 0.306 | 0.452 | 1.28E-32 | 1.1 |
| TES      | 5.73E-37 | 0.496244026  | 0.404 | 0.292 | 1.38E-32 | 1.1 |
| GTF2H5   | 5.91E-37 | -0.333360637 | 0.13  | 0.259 | 1.42E-32 | 1.1 |
| CD9      | 6.13E-37 | -0.346708673 | 0.153 | 0.291 | 1.48E-32 | 1.1 |
| TRAF3    | 6.44E-37 | -0.328842429 | 0.059 | 0.164 | 1.55E-32 | 1.1 |
| MPHOSPH8 | 9.00E-37 | -0.308310755 | 0.083 | 0.199 | 2.17E-32 | 1.1 |
| HNRNPM   | 9.27E-37 | 0.469367849  | 0.273 | 0.166 | 2.23E-32 | 1.1 |
| SCARA3   | 9.51E-37 | -0.322659221 | 0.011 | 0.086 | 2.29E-32 | 1.1 |
| XPO4     | 9.77E-37 | -0.298459854 | 0.059 | 0.164 | 2.35E-32 | 1.1 |
| NUB1     | 1.01E-36 | -0.634926761 | 0.194 | 0.327 | 2.45E-32 | 1.1 |
| C10orf76 | 1.06E-36 | -0.29540211  | 0.058 | 0.161 | 2.55E-32 | 1.1 |
| RASAL2   | 1.42E-36 | 0.757446804  | 0.59  | 0.524 | 3.44E-32 | 1.1 |
| TTC9     | 1.62E-36 | -0.327974082 | 0.104 | 0.228 | 3.90E-32 | 1.1 |
| DHRX     | 1.66E-36 | -0.369097483 | 0.129 | 0.258 | 4.00E-32 | 1.1 |
| ZPLD1    | 1.78E-36 | -0.537486646 | 0.053 | 0.153 | 4.28E-32 | 1.1 |
| RGS2     | 1.92E-36 | 1.098757703  | 0.287 | 0.184 | 4.63E-32 | 1.1 |
| COG5     | 2.00E-36 | -0.333270619 | 0.333 | 0.504 | 4.82E-32 | 1.1 |
| IL4R     | 2.02E-36 | -0.337530812 | 0.06  | 0.163 | 4.88E-32 | 1.1 |
| PARVA    | 3.16E-36 | -0.326499425 | 0.065 | 0.172 | 7.63E-32 | 1.1 |
| STEAP1B  | 3.23E-36 | 0.365637561  | 0.975 | 0.946 | 7.80E-32 | 1.1 |
| EBP      | 3.42E-36 | -0.308030718 | 0.037 | 0.129 | 8.25E-32 | 1.1 |
| VDR      | 3.62E-36 | -0.269116234 | 0.03  | 0.119 | 8.74E-32 | 1.1 |

|          |          |              |       |       |          |     |
|----------|----------|--------------|-------|-------|----------|-----|
| RPL37    | 3.74E-36 | 0.229287369  | 0.987 | 0.969 | 9.03E-32 | 1.1 |
| ADGRF1   | 3.88E-36 | -0.29658722  | 0.009 | 0.08  | 9.36E-32 | 1.1 |
| PTPN4    | 4.07E-36 | -0.287706274 | 0.028 | 0.114 | 9.81E-32 | 1.1 |
| ZNF235   | 4.11E-36 | -0.281118386 | 0.018 | 0.097 | 9.92E-32 | 1.1 |
| KIAA2026 | 5.41E-36 | -0.321659194 | 0.068 | 0.174 | 1.30E-31 | 1.1 |
| RPS6KC1  | 5.82E-36 | -0.289760336 | 0.025 | 0.11  | 1.40E-31 | 1.1 |
| NCEH1    | 7.87E-36 | -0.427568873 | 0.126 | 0.255 | 1.90E-31 | 1.1 |
| PPP2R5A  | 8.32E-36 | -0.320338135 | 0.07  | 0.177 | 2.01E-31 | 1.1 |
| ICAM1    | 8.43E-36 | -0.334202045 | 0.075 | 0.188 | 2.03E-31 | 1.1 |
| PPM1K    | 8.87E-36 | -0.277890654 | 0.027 | 0.112 | 2.14E-31 | 1.1 |
| TTC14    | 1.06E-35 | -0.269184592 | 0.017 | 0.095 | 2.55E-31 | 1.1 |
| ZNF592   | 1.09E-35 | 0.419435659  | 0.192 | 0.099 | 2.62E-31 | 1.1 |
| BCL2L1   | 1.10E-35 | -0.307352384 | 0.032 | 0.12  | 2.65E-31 | 1.1 |
| RUFY3    | 1.21E-35 | -0.349013668 | 0.09  | 0.206 | 2.93E-31 | 1.1 |
| TANK     | 1.38E-35 | -0.240331217 | 0.49  | 0.686 | 3.33E-31 | 1.1 |
| ATXN3    | 1.41E-35 | -0.306105448 | 0.083 | 0.197 | 3.39E-31 | 1.1 |
| SON      | 1.47E-35 | -0.381630508 | 0.579 | 0.73  | 3.54E-31 | 1.1 |
| ATP2B4   | 1.55E-35 | -0.417287526 | 0.169 | 0.31  | 3.73E-31 | 1.1 |
| ESD      | 1.74E-35 | 0.477611617  | 0.519 | 0.433 | 4.20E-31 | 1.1 |
| MYO9A    | 1.75E-35 | -0.313947363 | 0.185 | 0.333 | 4.23E-31 | 1.1 |
| SOS2     | 2.42E-35 | -0.293062764 | 0.341 | 0.515 | 5.84E-31 | 1.1 |
| NR3C2    | 2.48E-35 | -0.350859022 | 0.049 | 0.146 | 5.97E-31 | 1.1 |
| HIPK3    | 2.60E-35 | -0.352962695 | 0.097 | 0.214 | 6.27E-31 | 1.1 |
| NR4A1    | 2.97E-35 | 0.223001734  | 0.061 | 0.014 | 7.15E-31 | 1.1 |
| LRIF1    | 3.18E-35 | -0.240675504 | 0.014 | 0.089 | 7.66E-31 | 1.1 |
| PRDM1    | 3.36E-35 | -0.261226589 | 0.013 | 0.088 | 8.11E-31 | 1.1 |
| NUMB     | 3.41E-35 | -0.279736056 | 0.318 | 0.49  | 8.22E-31 | 1.1 |
| SLC9A8   | 3.47E-35 | -0.276216037 | 0.028 | 0.113 | 8.36E-31 | 1.1 |
| ZNF710   | 3.77E-35 | -0.297968879 | 0.036 | 0.125 | 9.10E-31 | 1.1 |
| RND3     | 3.82E-35 | 0.561958567  | 0.381 | 0.272 | 9.21E-31 | 1.1 |
| PRMT2    | 4.44E-35 | -0.297419044 | 0.054 | 0.153 | 1.07E-30 | 1.1 |
| TAF7     | 5.08E-35 | -0.302874123 | 0.069 | 0.175 | 1.23E-30 | 1.1 |
| EPS15    | 5.33E-35 | -0.317740034 | 0.14  | 0.271 | 1.28E-30 | 1.1 |
| CD58     | 5.44E-35 | -0.284737331 | 0.028 | 0.112 | 1.31E-30 | 1.1 |
| ATXN10   | 5.54E-35 | -0.321616422 | 0.078 | 0.187 | 1.34E-30 | 1.1 |
| TASP1    | 5.89E-35 | -0.319210417 | 0.073 | 0.18  | 1.42E-30 | 1.1 |
| MFSD6    | 6.91E-35 | -0.27374066  | 0.027 | 0.112 | 1.67E-30 | 1.1 |
| ARF6     | 7.04E-35 | 0.484588411  | 0.265 | 0.161 | 1.70E-30 | 1.1 |
| RPL22L1  | 7.15E-35 | 0.424485637  | 0.615 | 0.543 | 1.73E-30 | 1.1 |
| CNTNAP3B | 7.25E-35 | -0.271857985 | 0.043 | 0.138 | 1.75E-30 | 1.1 |
| GLCCI1   | 7.26E-35 | -0.258971485 | 0.022 | 0.103 | 1.75E-30 | 1.1 |
| ROCK2    | 7.40E-35 | -0.342456135 | 0.162 | 0.298 | 1.78E-30 | 1.1 |
| WDR11    | 7.45E-35 | -0.261674041 | 0.021 | 0.101 | 1.80E-30 | 1.1 |
| DPP8     | 9.98E-35 | -0.266753851 | 0.025 | 0.108 | 2.41E-30 | 1.1 |
| UAP1     | 1.01E-34 | -0.300725882 | 0.144 | 0.277 | 2.43E-30 | 1.1 |
| SNX18    | 1.03E-34 | 0.276254962  | 0.11  | 0.042 | 2.49E-30 | 1.1 |
| FOCAD    | 1.09E-34 | -0.339917032 | 0.095 | 0.21  | 2.63E-30 | 1.1 |

|           |          |              |       |       |          |     |
|-----------|----------|--------------|-------|-------|----------|-----|
| FBXL4     | 1.17E-34 | -0.268607076 | 0.025 | 0.107 | 2.83E-30 | 1.1 |
| ATE1      | 1.18E-34 | -0.297198122 | 0.041 | 0.133 | 2.85E-30 | 1.1 |
| CRADD     | 1.25E-34 | -0.323962842 | 0.036 | 0.124 | 3.02E-30 | 1.1 |
| RBBP6     | 1.33E-34 | -0.300565366 | 0.132 | 0.26  | 3.21E-30 | 1.1 |
| MICU2     | 1.37E-34 | -0.298648013 | 0.058 | 0.158 | 3.31E-30 | 1.1 |
| LINGO2    | 1.37E-34 | -0.556329055 | 0.013 | 0.086 | 3.32E-30 | 1.1 |
| LIMCH1    | 1.45E-34 | -0.297213215 | 0.164 | 0.306 | 3.49E-30 | 1.1 |
| LARGE     | 1.55E-34 | -0.33546211  | 0.139 | 0.268 | 3.75E-30 | 1.1 |
| LARP7     | 1.66E-34 | -0.288100202 | 0.09  | 0.205 | 4.01E-30 | 1.1 |
| TKT       | 1.94E-34 | -0.305748983 | 0.06  | 0.162 | 4.67E-30 | 1.1 |
| RAB31     | 2.05E-34 | -0.29514769  | 0.042 | 0.134 | 4.93E-30 | 1.1 |
| MMP24     | 2.06E-34 | -0.277327777 | 0.04  | 0.131 | 4.96E-30 | 1.1 |
| FAM157C   | 2.07E-34 | -0.288434806 | 0.075 | 0.185 | 4.99E-30 | 1.1 |
| LPIN1     | 2.16E-34 | 0.557795166  | 0.419 | 0.316 | 5.21E-30 | 1.1 |
| TGFB2     | 2.28E-34 | 0.546462268  | 0.325 | 0.214 | 5.50E-30 | 1.1 |
| CAP1      | 2.32E-34 | -0.310529375 | 0.135 | 0.262 | 5.60E-30 | 1.1 |
| PPA2      | 2.46E-34 | -0.311070991 | 0.113 | 0.234 | 5.92E-30 | 1.1 |
| MAPKAPK2  | 2.75E-34 | 0.363380506  | 0.196 | 0.102 | 6.62E-30 | 1.1 |
| SDCCAG8   | 2.78E-34 | -0.353903321 | 0.1   | 0.214 | 6.71E-30 | 1.1 |
| BIRC6-AS2 | 2.99E-34 | -0.301050169 | 0.135 | 0.266 | 7.20E-30 | 1.1 |
| MITD1     | 3.98E-34 | -0.256913545 | 0.046 | 0.141 | 9.59E-30 | 1.1 |
| RSBN1L    | 4.04E-34 | 0.473892884  | 0.189 | 0.099 | 9.75E-30 | 1.1 |
| ZNF106    | 4.42E-34 | -0.286462877 | 0.049 | 0.144 | 1.07E-29 | 1.1 |
| PNRC1     | 4.51E-34 | -0.267834133 | 0.409 | 0.583 | 1.09E-29 | 1.1 |
| SP1       | 4.56E-34 | -0.309408545 | 0.065 | 0.167 | 1.10E-29 | 1.1 |
| UBR1      | 4.84E-34 | -0.304222547 | 0.058 | 0.156 | 1.17E-29 | 1.1 |
| MEST      | 5.10E-34 | 0.269715302  | 0.078 | 0.023 | 1.23E-29 | 1.1 |
| SHPRH     | 5.57E-34 | -0.309878516 | 0.04  | 0.128 | 1.34E-29 | 1.1 |
| CDKAL1    | 5.70E-34 | -0.318291839 | 0.149 | 0.281 | 1.37E-29 | 1.1 |
| HERC3     | 6.24E-34 | 0.541617724  | 0.226 | 0.13  | 1.50E-29 | 1.1 |
| C20orf194 | 6.42E-34 | -0.330500378 | 0.081 | 0.19  | 1.55E-29 | 1.1 |
| PPM1L     | 6.85E-34 | -0.297153523 | 0.018 | 0.094 | 1.65E-29 | 1.1 |
| TALDO1    | 8.00E-34 | -0.302788449 | 0.024 | 0.103 | 1.93E-29 | 1.1 |
| DIAPH3    | 8.03E-34 | 0.486622794  | 0.195 | 0.102 | 1.94E-29 | 1.1 |
| PHLDB2    | 8.51E-34 | -0.372136691 | 0.157 | 0.287 | 2.05E-29 | 1.1 |
| MEIS2     | 9.07E-34 | -0.363220988 | 0.158 | 0.291 | 2.19E-29 | 1.1 |
| IMMP2L    | 9.38E-34 | -0.471572775 | 0.218 | 0.352 | 2.26E-29 | 1.1 |
| ZBED5     | 9.43E-34 | -0.249338888 | 0.02  | 0.098 | 2.27E-29 | 1.1 |
| ATP6V0A1  | 9.66E-34 | 0.425532111  | 0.247 | 0.145 | 2.33E-29 | 1.1 |
| DIRC2     | 9.73E-34 | -0.257685635 | 0.015 | 0.089 | 2.35E-29 | 1.1 |
| CCNY      | 1.37E-33 | 0.825483378  | 0.331 | 0.235 | 3.31E-29 | 1.1 |
| PDK3      | 1.62E-33 | 0.641542259  | 0.358 | 0.254 | 3.90E-29 | 1.1 |
| TRIB2     | 1.64E-33 | -0.21672585  | 0.008 | 0.074 | 3.97E-29 | 1.1 |
| PPP1R21   | 1.67E-33 | -0.275169651 | 0.03  | 0.114 | 4.02E-29 | 1.1 |
| SMAD1     | 1.74E-33 | -0.24410597  | 0.028 | 0.109 | 4.21E-29 | 1.1 |
| MT-ND1    | 1.78E-33 | -0.3232977   | 0.962 | 0.976 | 4.30E-29 | 1.1 |
| NAIP      | 1.80E-33 | -0.24204071  | 0.012 | 0.082 | 4.34E-29 | 1.1 |

|            |          |              |       |       |          |     |
|------------|----------|--------------|-------|-------|----------|-----|
| ELMOD3     | 1.89E-33 | -0.267069628 | 0.029 | 0.111 | 4.55E-29 | 1.1 |
| GS1-24F4.2 | 2.04E-33 | -0.328911029 | 0.042 | 0.132 | 4.92E-29 | 1.1 |
| CRABP1     | 2.10E-33 | 0.112906848  | 0.04  | 0.006 | 5.06E-29 | 1.1 |
| PSD3       | 2.12E-33 | -0.363588559 | 0.119 | 0.238 | 5.11E-29 | 1.1 |
| RFX3-AS1   | 2.15E-33 | -0.28683106  | 0.018 | 0.092 | 5.19E-29 | 1.1 |
| RPS6KA3    | 2.50E-33 | 0.60377484   | 0.416 | 0.319 | 6.03E-29 | 1.1 |
| TOP2B      | 2.64E-33 | 0.433248777  | 0.251 | 0.151 | 6.36E-29 | 1.1 |
| PTGR1      | 3.09E-33 | -0.320330939 | 0.163 | 0.295 | 7.46E-29 | 1.1 |
| UBA52      | 3.53E-33 | 0.248480152  | 0.957 | 0.955 | 8.52E-29 | 1.1 |
| ST3GAL6    | 3.96E-33 | -0.314493381 | 0.05  | 0.144 | 9.54E-29 | 1.1 |
| NOP10      | 4.09E-33 | -0.32428838  | 0.355 | 0.512 | 9.86E-29 | 1.1 |
| RPL7       | 4.12E-33 | 0.417136652  | 0.971 | 0.956 | 9.94E-29 | 1.1 |
| CH17-189H  | 4.17E-33 | -0.333176255 | 0.06  | 0.157 | 1.00E-28 | 1.1 |
| FAM208A    | 4.27E-33 | -0.228104024 | 0.017 | 0.091 | 1.03E-28 | 1.1 |
| PRR14L     | 4.49E-33 | -0.26970365  | 0.028 | 0.11  | 1.08E-28 | 1.1 |
| UBE2E2     | 4.55E-33 | -0.343866269 | 0.287 | 0.443 | 1.10E-28 | 1.1 |
| WNT2B      | 4.88E-33 | -0.266961186 | 0.008 | 0.075 | 1.18E-28 | 1.1 |
| HTATIP2    | 4.89E-33 | -0.232712298 | 0.039 | 0.127 | 1.18E-28 | 1.1 |
| SEL1L3     | 4.97E-33 | -0.244481036 | 0.008 | 0.073 | 1.20E-28 | 1.1 |
| ADRBK2     | 5.41E-33 | -0.29003539  | 0.04  | 0.128 | 1.30E-28 | 1.1 |
| RALGAPA1   | 5.66E-33 | -0.337446306 | 0.144 | 0.27  | 1.36E-28 | 1.1 |
| CTSC       | 5.71E-33 | -0.240998649 | 0.008 | 0.073 | 1.38E-28 | 1.1 |
| FAM134B    | 5.71E-33 | -0.382008179 | 0.075 | 0.178 | 1.38E-28 | 1.1 |
| RPS6KA5    | 6.44E-33 | -0.308831513 | 0.121 | 0.241 | 1.55E-28 | 1.1 |
| CDC26      | 6.73E-33 | -0.276554538 | 0.131 | 0.254 | 1.62E-28 | 1.1 |
| EIF3H      | 6.90E-33 | 0.3673732    | 0.719 | 0.691 | 1.66E-28 | 1.1 |
| SMC6       | 7.20E-33 | -0.252754958 | 0.02  | 0.096 | 1.74E-28 | 1.1 |
| NPAS3      | 7.71E-33 | -0.33158413  | 0.083 | 0.191 | 1.86E-28 | 1.1 |
| TRIM38     | 8.95E-33 | -0.280777719 | 0.041 | 0.128 | 2.16E-28 | 1.1 |
| SH3PXD2B   | 9.10E-33 | -0.272245128 | 0.06  | 0.158 | 2.19E-28 | 1.1 |
| TXNDC9     | 9.46E-33 | -0.292966714 | 0.072 | 0.175 | 2.28E-28 | 1.1 |
| CEBPZOS    | 9.53E-33 | -0.250168161 | 0.068 | 0.17  | 2.30E-28 | 1.1 |
| LRP10      | 1.03E-32 | -0.267003483 | 0.044 | 0.134 | 2.48E-28 | 1.1 |
| ABHD3      | 1.15E-32 | -0.253182531 | 0.068 | 0.17  | 2.77E-28 | 1.1 |
| IFFO2      | 1.30E-32 | 0.414642683  | 0.213 | 0.117 | 3.14E-28 | 1.1 |
| KREMEN1    | 1.34E-32 | -0.230012795 | 0.019 | 0.094 | 3.23E-28 | 1.1 |
| DHRS7B     | 1.39E-32 | -0.245464714 | 0.015 | 0.086 | 3.35E-28 | 1.1 |
| PDCD4      | 1.41E-32 | -0.36050485  | 0.134 | 0.257 | 3.39E-28 | 1.1 |
| GXYLT2     | 1.46E-32 | -0.281256738 | 0.028 | 0.108 | 3.52E-28 | 1.1 |
| PITPNC1    | 1.69E-32 | -0.484264242 | 0.129 | 0.245 | 4.07E-28 | 1.1 |
| TYW5       | 1.69E-32 | -0.233262732 | 0.014 | 0.084 | 4.08E-28 | 1.1 |
| NCOA1      | 1.70E-32 | -0.353310587 | 0.291 | 0.443 | 4.10E-28 | 1.1 |
| HUWE1      | 2.02E-32 | -0.276684534 | 0.227 | 0.376 | 4.87E-28 | 1.1 |
| FGGY       | 2.23E-32 | -0.322817506 | 0.139 | 0.264 | 5.38E-28 | 1.1 |
| HIST1H2BB  | 2.29E-32 | -0.371147641 | 0.065 | 0.163 | 5.52E-28 | 1.1 |
| ADNP       | 2.45E-32 | -0.323950215 | 0.209 | 0.351 | 5.92E-28 | 1.1 |
| IDH1       | 2.70E-32 | -0.212555167 | 0.018 | 0.09  | 6.52E-28 | 1.1 |

|           |          |              |       |       |          |     |
|-----------|----------|--------------|-------|-------|----------|-----|
| COX7C     | 2.74E-32 | 0.29771071   | 0.905 | 0.881 | 6.60E-28 | 1.1 |
| PADI2     | 2.77E-32 | -0.390524855 | 0.1   | 0.209 | 6.69E-28 | 1.1 |
| BTBD11    | 3.13E-32 | -0.300766165 | 0.021 | 0.095 | 7.56E-28 | 1.1 |
| IGF1R     | 3.27E-32 | -0.364688104 | 0.299 | 0.455 | 7.88E-28 | 1.1 |
| TTC39B    | 3.36E-32 | -0.266922725 | 0.04  | 0.126 | 8.11E-28 | 1.1 |
| CHCHD3    | 3.41E-32 | 0.278625182  | 0.897 | 0.878 | 8.22E-28 | 1.1 |
| UQCRC2    | 4.00E-32 | 0.454631195  | 0.505 | 0.428 | 9.64E-28 | 1.1 |
| PARN      | 4.78E-32 | -0.259635476 | 0.027 | 0.105 | 1.15E-27 | 1.1 |
| YARS      | 4.96E-32 | 0.495621918  | 0.356 | 0.253 | 1.20E-27 | 1.1 |
| LINC01191 | 5.02E-32 | -0.226063753 | 0.009 | 0.074 | 1.21E-27 | 1.1 |
| MRPL33    | 5.05E-32 | -0.284321486 | 0.311 | 0.472 | 1.22E-27 | 1.1 |
| SC5D      | 5.26E-32 | -0.25780017  | 0.032 | 0.114 | 1.27E-27 | 1.1 |
| ZFP14     | 5.61E-32 | -0.226386374 | 0.018 | 0.091 | 1.35E-27 | 1.1 |
| MSH3      | 5.65E-32 | -0.306470425 | 0.041 | 0.128 | 1.36E-27 | 1.1 |
| MAMDC2    | 5.70E-32 | 0.312438916  | 0.944 | 0.938 | 1.37E-27 | 1.1 |
| KATNBL1   | 6.89E-32 | -0.285887722 | 0.072 | 0.172 | 1.66E-27 | 1.1 |
| NEBL      | 7.07E-32 | -0.315977945 | 0.386 | 0.544 | 1.71E-27 | 1.1 |
| ECHDC1    | 7.12E-32 | -0.286138404 | 0.178 | 0.31  | 1.72E-27 | 1.1 |
| GUCY1A3   | 7.65E-32 | -0.355185108 | 0.141 | 0.263 | 1.85E-27 | 1.1 |
| WVOX      | 7.95E-32 | -0.629754    | 0.14  | 0.254 | 1.92E-27 | 1.1 |
| ATM       | 8.04E-32 | -0.266296123 | 0.02  | 0.093 | 1.94E-27 | 1.1 |
| KCTD7     | 8.29E-32 | -0.306464669 | 0.059 | 0.153 | 2.00E-27 | 1.1 |
| RPL19     | 8.45E-32 | 0.402507411  | 0.935 | 0.939 | 2.04E-27 | 1.1 |
| KCNQ1     | 8.72E-32 | -0.291358296 | 0.035 | 0.119 | 2.10E-27 | 1.1 |
| SNX14     | 9.04E-32 | -0.237983272 | 0.032 | 0.113 | 2.18E-27 | 1.1 |
| TBC1D8    | 9.16E-32 | 0.529822765  | 0.474 | 0.381 | 2.21E-27 | 1.1 |
| ZNRF2     | 1.00E-31 | -0.289611903 | 0.082 | 0.187 | 2.42E-27 | 1.1 |
| SGMS1     | 1.21E-31 | -0.246848772 | 0.172 | 0.311 | 2.91E-27 | 1.1 |
| ZNF37A    | 1.22E-31 | -0.270813947 | 0.033 | 0.113 | 2.94E-27 | 1.1 |
| TNS3      | 1.24E-31 | -0.305720208 | 0.025 | 0.101 | 3.00E-27 | 1.1 |
| ZNF718    | 1.25E-31 | -0.225427489 | 0.011 | 0.077 | 3.02E-27 | 1.1 |
| SMURF1    | 1.28E-31 | -0.25918321  | 0.167 | 0.3   | 3.08E-27 | 1.1 |
| AGO4      | 1.69E-31 | -0.24951536  | 0.042 | 0.128 | 4.07E-27 | 1.1 |
| RP11-711K | 1.73E-31 | -0.276102966 | 0.012 | 0.079 | 4.17E-27 | 1.1 |
| YWHAB     | 1.98E-31 | -0.298056279 | 0.182 | 0.315 | 4.76E-27 | 1.1 |
| HLA-DRA   | 2.16E-31 | 0.636905883  | 0.225 | 0.132 | 5.22E-27 | 1.1 |
| SPX       | 2.34E-31 | -0.212327501 | 0.003 | 0.061 | 5.64E-27 | 1.1 |
| KRT7      | 2.43E-31 | 0.466846146  | 0.357 | 0.249 | 5.85E-27 | 1.1 |
| ZMYM4     | 2.52E-31 | 0.315435103  | 0.893 | 0.899 | 6.07E-27 | 1.1 |
| H1FO      | 2.78E-31 | -0.324119441 | 0.094 | 0.199 | 6.70E-27 | 1.1 |
| FAM20A    | 2.87E-31 | -0.262383234 | 0.018 | 0.089 | 6.91E-27 | 1.1 |
| IKBKB     | 2.91E-31 | -0.280841008 | 0.05  | 0.141 | 7.01E-27 | 1.1 |
| ADARB1    | 2.96E-31 | -0.221606195 | 0.01  | 0.075 | 7.14E-27 | 1.1 |
| RBM39     | 2.97E-31 | 0.401962363  | 0.523 | 0.437 | 7.15E-27 | 1.1 |
| FBN1      | 3.00E-31 | -0.275145235 | 0.005 | 0.066 | 7.24E-27 | 1.1 |
| 10-Sep    | 3.11E-31 | -0.282937362 | 0.076 | 0.176 | 7.49E-27 | 1.1 |
| LINC01183 | 3.28E-31 | -0.26049508  | 0.012 | 0.077 | 7.91E-27 | 1.1 |



|           |          |              |       |       |          |     |
|-----------|----------|--------------|-------|-------|----------|-----|
| NR2F2     | 3.38E-31 | -0.22154601  | 0.034 | 0.115 | 8.16E-27 | 1.1 |
| MBOAT1    | 3.39E-31 | 0.35164907   | 0.118 | 0.05  | 8.18E-27 | 1.1 |
| GRIP1     | 3.69E-31 | -0.298673508 | 0.115 | 0.23  | 8.89E-27 | 1.1 |
| ADD3      | 4.49E-31 | -0.315118084 | 0.084 | 0.186 | 1.08E-26 | 1.1 |
| C2orf68   | 4.55E-31 | -0.212813805 | 0.015 | 0.083 | 1.10E-26 | 1.1 |
| MMADHC    | 4.95E-31 | -0.300226566 | 0.268 | 0.414 | 1.19E-26 | 1.1 |
| MIR4435-2 | 5.03E-31 | 0.55247666   | 0.544 | 0.464 | 1.21E-26 | 1.1 |
| PARP8     | 5.27E-31 | -0.310554423 | 0.057 | 0.15  | 1.27E-26 | 1.1 |
| CSGALNAC  | 5.90E-31 | -0.312141681 | 0.032 | 0.111 | 1.42E-26 | 1.1 |
| SERPINE2  | 5.96E-31 | -0.251078151 | 0.008 | 0.069 | 1.44E-26 | 1.1 |
| ZDHHC13   | 6.05E-31 | -0.253764327 | 0.043 | 0.128 | 1.46E-26 | 1.1 |
| COL27A1   | 6.28E-31 | -0.371183335 | 0.038 | 0.121 | 1.52E-26 | 1.1 |
| UXS1      | 6.29E-31 | -0.293340446 | 0.037 | 0.119 | 1.52E-26 | 1.1 |
| SCGB2B2   | 6.60E-31 | -0.231071384 | 0.012 | 0.077 | 1.59E-26 | 1.1 |
| CSNK1E    | 7.29E-31 | -0.317493128 | 0.165 | 0.294 | 1.76E-26 | 1.1 |
| CATSPER2  | 9.45E-31 | -0.236574532 | 0.03  | 0.108 | 2.28E-26 | 1.1 |
| CD63      | 9.68E-31 | -0.397165855 | 0.131 | 0.245 | 2.33E-26 | 1.1 |
| STAT5B    | 1.00E-30 | -0.332095209 | 0.105 | 0.214 | 2.42E-26 | 1.1 |
| MRPS18C   | 1.03E-30 | -0.235771354 | 0.108 | 0.222 | 2.47E-26 | 1.1 |
| PHIP      | 1.04E-30 | -0.300723085 | 0.307 | 0.462 | 2.51E-26 | 1.1 |
| PXDN      | 1.12E-30 | -0.249921585 | 0.051 | 0.141 | 2.70E-26 | 1.1 |
| LINC01137 | 1.14E-30 | -0.227577094 | 0.012 | 0.077 | 2.74E-26 | 1.1 |
| PAWR      | 1.20E-30 | 0.530439485  | 0.529 | 0.463 | 2.91E-26 | 1.1 |
| ZFAND6    | 1.25E-30 | -0.274386198 | 0.257 | 0.407 | 3.01E-26 | 1.1 |
| TCEB1     | 1.30E-30 | -0.329821456 | 0.196 | 0.331 | 3.13E-26 | 1.1 |
| RNF170    | 1.30E-30 | -0.207378359 | 0.01  | 0.073 | 3.14E-26 | 1.1 |
| OPHN1     | 1.38E-30 | -0.317312805 | 0.136 | 0.256 | 3.33E-26 | 1.1 |
| PSEN1     | 1.41E-30 | -0.291561868 | 0.13  | 0.248 | 3.39E-26 | 1.1 |
| SCNN1A    | 1.42E-30 | -0.244655427 | 0.023 | 0.096 | 3.43E-26 | 1.1 |
| UBE4B     | 1.77E-30 | -0.259017223 | 0.125 | 0.244 | 4.27E-26 | 1.1 |
| SEC22A    | 1.80E-30 | -0.299269768 | 0.068 | 0.165 | 4.35E-26 | 1.1 |
| PRRG4     | 1.83E-30 | -0.290311493 | 0.118 | 0.229 | 4.40E-26 | 1.1 |
| TMEM57    | 1.85E-30 | 0.448089007  | 0.24  | 0.147 | 4.45E-26 | 1.1 |
| ZBTB1     | 1.89E-30 | -0.25087922  | 0.032 | 0.11  | 4.56E-26 | 1.1 |
| SOSTDC1   | 1.91E-30 | 0.230664722  | 0.053 | 0.012 | 4.61E-26 | 1.1 |
| MICAL2    | 1.94E-30 | -0.261974341 | 0.015 | 0.082 | 4.68E-26 | 1.1 |
| SGPL1     | 2.04E-30 | -0.245277903 | 0.053 | 0.143 | 4.91E-26 | 1.1 |
| MCC       | 2.04E-30 | -0.297220681 | 0.05  | 0.137 | 4.92E-26 | 1.1 |
| KPNA3     | 2.04E-30 | -0.269046671 | 0.048 | 0.136 | 4.93E-26 | 1.1 |
| SPINT1    | 2.06E-30 | -0.284024308 | 0.057 | 0.148 | 4.96E-26 | 1.1 |
| CEP192    | 3.31E-30 | -0.247898118 | 0.034 | 0.113 | 7.99E-26 | 1.1 |
| DHX32     | 3.41E-30 | -0.30782162  | 0.133 | 0.25  | 8.23E-26 | 1.1 |
| ZNF791    | 3.50E-30 | -0.25359242  | 0.048 | 0.135 | 8.45E-26 | 1.1 |
| TRIM13    | 3.54E-30 | -0.200803858 | 0.03  | 0.106 | 8.53E-26 | 1.1 |
| ESRRA     | 3.56E-30 | -0.208582089 | 0.017 | 0.085 | 8.57E-26 | 1.1 |
| DPYD-AS1  | 3.91E-30 | -0.284533919 | 0.033 | 0.112 | 9.42E-26 | 1.1 |
| PSMB1     | 4.02E-30 | -0.311033096 | 0.351 | 0.502 | 9.69E-26 | 1.1 |

|          |          |              |       |       |          |     |
|----------|----------|--------------|-------|-------|----------|-----|
| CACHD1   | 4.20E-30 | -0.263190183 | 0.033 | 0.111 | 1.01E-25 | 1.1 |
| ZNF431   | 4.27E-30 | -0.252169662 | 0.065 | 0.159 | 1.03E-25 | 1.1 |
| SLC39A14 | 4.37E-30 | -0.327934605 | 0.241 | 0.381 | 1.05E-25 | 1.1 |
| MNAT1    | 4.90E-30 | -0.304382029 | 0.224 | 0.361 | 1.18E-25 | 1.1 |
| LPP      | 5.18E-30 | -0.298861575 | 0.827 | 0.911 | 1.25E-25 | 1.1 |
| EIF2S2   | 5.75E-30 | -0.341941833 | 0.183 | 0.307 | 1.39E-25 | 1.1 |
| ZNF721   | 6.29E-30 | -0.304206904 | 0.13  | 0.246 | 1.52E-25 | 1.1 |
| HSD17B4  | 6.75E-30 | -0.298247898 | 0.085 | 0.188 | 1.63E-25 | 1.1 |
| ZNF69    | 7.93E-30 | -0.210980156 | 0.011 | 0.074 | 1.91E-25 | 1.1 |
| HSP90AA1 | 7.98E-30 | 0.30446593   | 0.917 | 0.916 | 1.92E-25 | 1.1 |
| SNX29    | 8.05E-30 | -0.313807154 | 0.044 | 0.128 | 1.94E-25 | 1.1 |
| CDC27    | 9.32E-30 | 0.543739746  | 0.31  | 0.216 | 2.25E-25 | 1.1 |
| ZNF766   | 9.44E-30 | -0.217382878 | 0.026 | 0.101 | 2.28E-25 | 1.1 |
| PPP1CB   | 1.04E-29 | 0.496487367  | 0.478 | 0.401 | 2.50E-25 | 1.1 |
| NRG2     | 1.06E-29 | -0.278842045 | 0.013 | 0.077 | 2.56E-25 | 1.1 |
| SGK1     | 1.11E-29 | -0.278497856 | 0.099 | 0.206 | 2.67E-25 | 1.1 |
| 6-Mar    | 1.16E-29 | 0.480349819  | 0.409 | 0.32  | 2.81E-25 | 1.1 |
| FAM160A1 | 1.24E-29 | 0.485442243  | 0.715 | 0.695 | 2.99E-25 | 1.1 |
| BBIP1    | 1.38E-29 | -0.227141609 | 0.044 | 0.128 | 3.33E-25 | 1.1 |
| UBD      | 1.45E-29 | -0.809028103 | 0.095 | 0.196 | 3.49E-25 | 1.1 |
| TUFT1    | 1.45E-29 | 0.386212465  | 0.216 | 0.126 | 3.50E-25 | 1.1 |
| PHC3     | 1.54E-29 | -0.274162157 | 0.105 | 0.212 | 3.71E-25 | 1.1 |
| ZFH3     | 1.55E-29 | -0.299206623 | 0.053 | 0.139 | 3.73E-25 | 1.1 |
| TLR5     | 1.56E-29 | -0.197244682 | 0.007 | 0.066 | 3.76E-25 | 1.1 |
| PARK2    | 1.69E-29 | -0.331867046 | 0.091 | 0.193 | 4.08E-25 | 1.1 |
| ZNF24    | 1.74E-29 | -0.258688688 | 0.145 | 0.264 | 4.20E-25 | 1.1 |
| GBAS     | 1.77E-29 | -0.25500191  | 0.11  | 0.221 | 4.26E-25 | 1.1 |
| MRPL27   | 1.89E-29 | -0.252264175 | 0.094 | 0.199 | 4.56E-25 | 1.1 |
| ACACA    | 1.91E-29 | -0.272523085 | 0.081 | 0.181 | 4.60E-25 | 1.1 |
| TOP1     | 2.08E-29 | 0.497289613  | 0.408 | 0.319 | 5.02E-25 | 1.1 |
| TMEM245  | 2.09E-29 | -0.244142598 | 0.039 | 0.12  | 5.04E-25 | 1.1 |
| SPRED2   | 2.34E-29 | -0.261478394 | 0.053 | 0.141 | 5.65E-25 | 1.1 |
| USP32    | 2.44E-29 | -0.293675007 | 0.118 | 0.23  | 5.88E-25 | 1.1 |
| TSMF     | 2.70E-29 | -0.218177068 | 0.01  | 0.07  | 6.52E-25 | 1.1 |
| FERMT2   | 2.72E-29 | 0.440312418  | 0.228 | 0.138 | 6.57E-25 | 1.1 |
| RPL10A   | 2.77E-29 | 0.410991627  | 0.796 | 0.782 | 6.69E-25 | 1.1 |
| VPS45    | 3.08E-29 | -0.224505404 | 0.032 | 0.109 | 7.42E-25 | 1.1 |
| ZNF274   | 3.09E-29 | -0.234887568 | 0.03  | 0.106 | 7.45E-25 | 1.1 |
| PSMA4    | 3.17E-29 | -0.425703908 | 0.398 | 0.539 | 7.66E-25 | 1.1 |
| MBD2     | 3.43E-29 | 0.54446471   | 0.35  | 0.26  | 8.27E-25 | 1.1 |
| DTX2     | 3.58E-29 | -0.274454137 | 0.043 | 0.125 | 8.64E-25 | 1.1 |
| PTK2B    | 3.59E-29 | -0.236482571 | 0.012 | 0.075 | 8.65E-25 | 1.1 |
| MGA      | 3.79E-29 | -0.24250988  | 0.02  | 0.088 | 9.14E-25 | 1.1 |
| SRD5A3   | 4.06E-29 | -0.196809168 | 0.01  | 0.072 | 9.80E-25 | 1.1 |
| CAP2     | 4.20E-29 | -0.284516099 | 0.039 | 0.118 | 1.01E-24 | 1.1 |
| NEO1     | 4.35E-29 | -0.245967405 | 0.03  | 0.105 | 1.05E-24 | 1.1 |
| MRPL50   | 4.35E-29 | -0.240175309 | 0.067 | 0.161 | 1.05E-24 | 1.1 |

|           |          |              |       |       |          |     |
|-----------|----------|--------------|-------|-------|----------|-----|
| KDM3B     | 5.41E-29 | -0.29357183  | 0.1   | 0.205 | 1.31E-24 | 1.1 |
| SPATA5    | 5.53E-29 | -0.307405644 | 0.067 | 0.159 | 1.33E-24 | 1.1 |
| STK3      | 5.56E-29 | -0.211747497 | 0.259 | 0.415 | 1.34E-24 | 1.1 |
| RBM41     | 5.67E-29 | -0.227448483 | 0.032 | 0.108 | 1.37E-24 | 1.1 |
| MYO5C     | 6.04E-29 | -0.28912309  | 0.046 | 0.127 | 1.46E-24 | 1.1 |
| PRKRIP1   | 6.62E-29 | -0.253408509 | 0.071 | 0.166 | 1.60E-24 | 1.1 |
| YWHAE     | 7.25E-29 | 0.390983187  | 0.652 | 0.606 | 1.75E-24 | 1.1 |
| RP1-167A1 | 8.59E-29 | -0.22859559  | 0.012 | 0.073 | 2.07E-24 | 1.1 |
| PLIN2     | 8.97E-29 | 0.589228892  | 0.216 | 0.13  | 2.16E-24 | 1.1 |
| PDCD10    | 9.00E-29 | -0.319695586 | 0.193 | 0.321 | 2.17E-24 | 1.1 |
| POC1B     | 9.67E-29 | -0.241503047 | 0.039 | 0.119 | 2.33E-24 | 1.1 |
| EPS8      | 1.04E-28 | -0.231477193 | 0.326 | 0.493 | 2.51E-24 | 1.1 |
| RPL41     | 1.07E-28 | 0.301067501  | 0.964 | 0.95  | 2.58E-24 | 1.1 |
| RP5-945F2 | 1.08E-28 | 0.602835085  | 0.128 | 0.059 | 2.60E-24 | 1.1 |
| ASCC3     | 1.08E-28 | -0.31506503  | 0.128 | 0.238 | 2.61E-24 | 1.1 |
| STARD13   | 1.17E-28 | -0.28057964  | 0.121 | 0.232 | 2.82E-24 | 1.1 |
| HOOK2     | 1.20E-28 | -0.289485517 | 0.09  | 0.19  | 2.88E-24 | 1.1 |
| TRAF3IP2  | 1.23E-28 | -0.303073659 | 0.099 | 0.202 | 2.96E-24 | 1.1 |
| RP11-481C | 1.24E-28 | 0.313560455  | 0.11  | 0.046 | 2.99E-24 | 1.1 |
| NUTM2B-A  | 1.26E-28 | -0.257200523 | 0.2   | 0.333 | 3.03E-24 | 1.1 |
| ANGPT2    | 1.26E-28 | -0.194319062 | 0.005 | 0.06  | 3.03E-24 | 1.1 |
| URM1      | 1.29E-28 | -0.217660828 | 0.02  | 0.087 | 3.12E-24 | 1.1 |
| C1QTNF1   | 1.45E-28 | -0.206526054 | 0.005 | 0.06  | 3.51E-24 | 1.1 |
| DIS3L2    | 1.46E-28 | -0.272941954 | 0.045 | 0.127 | 3.52E-24 | 1.1 |
| SCD       | 1.46E-28 | -0.225754321 | 0.03  | 0.105 | 3.53E-24 | 1.1 |
| INO80     | 1.48E-28 | -0.254261036 | 0.09  | 0.19  | 3.58E-24 | 1.1 |
| AC016831. | 1.49E-28 | -0.306542826 | 0.164 | 0.289 | 3.59E-24 | 1.1 |
| 7-Mar     | 1.62E-28 | 0.464069932  | 0.35  | 0.257 | 3.90E-24 | 1.1 |
| ATG14     | 1.62E-28 | 0.353034405  | 0.155 | 0.08  | 3.90E-24 | 1.1 |
| RPS25     | 1.65E-28 | 0.369519357  | 0.862 | 0.867 | 3.97E-24 | 1.1 |
| FANCL     | 1.87E-28 | -0.227879584 | 0.028 | 0.1   | 4.50E-24 | 1.1 |
| LINC00894 | 1.90E-28 | -0.215185901 | 0.016 | 0.081 | 4.57E-24 | 1.1 |
| XRR1A1    | 1.91E-28 | -0.247699723 | 0.05  | 0.134 | 4.62E-24 | 1.1 |
| ATG5      | 1.95E-28 | -0.261902888 | 0.05  | 0.133 | 4.70E-24 | 1.1 |
| KDSR      | 1.96E-28 | -0.243107922 | 0.048 | 0.13  | 4.72E-24 | 1.1 |
| IWS1      | 2.19E-28 | -0.286821028 | 0.08  | 0.175 | 5.29E-24 | 1.1 |
| SLC5A6    | 2.22E-28 | -0.274818998 | 0.066 | 0.157 | 5.35E-24 | 1.1 |
| ZNF680    | 2.30E-28 | -0.236184686 | 0.039 | 0.118 | 5.55E-24 | 1.1 |
| NDUFA4    | 2.34E-28 | 0.341347552  | 0.807 | 0.799 | 5.64E-24 | 1.1 |
| CCDC174   | 3.09E-28 | -0.259615772 | 0.107 | 0.212 | 7.45E-24 | 1.1 |
| ZNF586    | 3.10E-28 | -0.246042604 | 0.042 | 0.121 | 7.48E-24 | 1.1 |
| KCCAT211  | 3.11E-28 | -0.289004716 | 0.011 | 0.071 | 7.50E-24 | 1.1 |
| ACBD6     | 3.18E-28 | -0.262183239 | 0.021 | 0.089 | 7.68E-24 | 1.1 |
| ZBTB44    | 3.24E-28 | -0.261331583 | 0.046 | 0.128 | 7.82E-24 | 1.1 |
| H2AFZ     | 3.47E-28 | -0.374611006 | 0.523 | 0.648 | 8.37E-24 | 1.1 |
| GTF2IRD2B | 3.53E-28 | -0.227818032 | 0.031 | 0.105 | 8.50E-24 | 1.1 |
| NRG1      | 3.55E-28 | -0.357825448 | 0.061 | 0.15  | 8.56E-24 | 1.1 |

|            |          |              |       |       |          |     |
|------------|----------|--------------|-------|-------|----------|-----|
| JKAMP      | 3.73E-28 | -0.231187425 | 0.03  | 0.102 | 8.99E-24 | 1.1 |
| ARPC3      | 3.74E-28 | -0.33681907  | 0.58  | 0.699 | 9.02E-24 | 1.1 |
| SPPL3      | 3.78E-28 | -0.278617472 | 0.162 | 0.283 | 9.11E-24 | 1.1 |
| ZNF260     | 3.82E-28 | -0.192049412 | 0.035 | 0.111 | 9.20E-24 | 1.1 |
| NMI        | 3.82E-28 | -0.253844168 | 0.06  | 0.147 | 9.22E-24 | 1.1 |
| PUS10      | 3.82E-28 | -0.225865769 | 0.02  | 0.087 | 9.22E-24 | 1.1 |
| ZNF98      | 4.12E-28 | -0.263886015 | 0.035 | 0.111 | 9.94E-24 | 1.1 |
| UBAP2      | 4.14E-28 | -0.280302641 | 0.11  | 0.216 | 9.99E-24 | 1.1 |
| PBRM1      | 4.24E-28 | -0.253592573 | 0.117 | 0.226 | 1.02E-23 | 1.1 |
| OSBPL1A    | 4.33E-28 | -0.281344508 | 0.079 | 0.174 | 1.04E-23 | 1.1 |
| SYNE2      | 4.34E-28 | -0.285669702 | 0.397 | 0.551 | 1.05E-23 | 1.1 |
| VWA5A      | 4.44E-28 | -0.215719151 | 0.048 | 0.131 | 1.07E-23 | 1.1 |
| ALG13      | 4.46E-28 | -0.225867538 | 0.042 | 0.122 | 1.07E-23 | 1.1 |
| CCL4       | 4.54E-28 | -2.447361294 | 0.034 | 0.106 | 1.09E-23 | 1.1 |
| FOXN2      | 4.68E-28 | -0.296113121 | 0.044 | 0.123 | 1.13E-23 | 1.1 |
| MTIF3      | 4.74E-28 | -0.2743893   | 0.155 | 0.275 | 1.14E-23 | 1.1 |
| GOSR1      | 4.92E-28 | -0.239799366 | 0.096 | 0.199 | 1.19E-23 | 1.1 |
| NEMF       | 5.11E-28 | -0.25217451  | 0.222 | 0.359 | 1.23E-23 | 1.1 |
| TRMT10B    | 5.29E-28 | -0.225064219 | 0.051 | 0.136 | 1.28E-23 | 1.1 |
| IKBKE      | 5.44E-28 | -0.197412837 | 0.003 | 0.056 | 1.31E-23 | 1.1 |
| MYO3B      | 5.77E-28 | -0.374648227 | 0.126 | 0.235 | 1.39E-23 | 1.1 |
| USP6NL     | 5.81E-28 | 0.464102831  | 0.276 | 0.182 | 1.40E-23 | 1.1 |
| DDR2       | 5.99E-28 | -0.314040646 | 0.055 | 0.14  | 1.44E-23 | 1.1 |
| TEAD2      | 7.01E-28 | -0.198279747 | 0.023 | 0.091 | 1.69E-23 | 1.1 |
| ERO1A      | 7.08E-28 | 0.63133815   | 0.409 | 0.331 | 1.71E-23 | 1.1 |
| ERN1       | 7.79E-28 | -0.264580732 | 0.073 | 0.166 | 1.88E-23 | 1.1 |
| DAZAP2     | 7.85E-28 | -0.24649084  | 0.269 | 0.413 | 1.89E-23 | 1.1 |
| MARK1      | 8.53E-28 | -0.250729196 | 0.032 | 0.105 | 2.06E-23 | 1.1 |
| RNF175     | 8.75E-28 | -0.246048597 | 0.008 | 0.065 | 2.11E-23 | 1.1 |
| THAP6      | 9.33E-28 | -0.184228512 | 0.022 | 0.09  | 2.25E-23 | 1.1 |
| NAA38      | 9.83E-28 | -0.220291481 | 0.016 | 0.08  | 2.37E-23 | 1.1 |
| RAB18      | 1.01E-27 | 0.449203695  | 0.353 | 0.262 | 2.43E-23 | 1.1 |
| RP11-66B2  | 1.02E-27 | -0.2926594   | 0.03  | 0.101 | 2.47E-23 | 1.1 |
| CP         | 1.17E-27 | -0.282036487 | 0.02  | 0.086 | 2.82E-23 | 1.1 |
| CDCP1      | 1.18E-27 | -0.248542408 | 0.265 | 0.417 | 2.84E-23 | 1.1 |
| SSR3       | 1.29E-27 | 0.42898748   | 0.629 | 0.579 | 3.11E-23 | 1.1 |
| NSUN4      | 1.32E-27 | -0.165615771 | 0.028 | 0.098 | 3.18E-23 | 1.1 |
| SHOC2      | 1.36E-27 | -0.259024854 | 0.136 | 0.25  | 3.27E-23 | 1.1 |
| AL109761.! | 1.39E-27 | -0.173882762 | 0.004 | 0.057 | 3.35E-23 | 1.1 |
| SPAG9      | 1.44E-27 | 0.511275726  | 0.403 | 0.316 | 3.46E-23 | 1.1 |
| LLPH       | 1.51E-27 | -0.234998732 | 0.068 | 0.159 | 3.64E-23 | 1.1 |
| TYW1B      | 1.57E-27 | -0.274779412 | 0.081 | 0.177 | 3.78E-23 | 1.1 |
| TMCO1      | 1.69E-27 | -0.249513954 | 0.228 | 0.366 | 4.07E-23 | 1.1 |
| RIC1       | 1.70E-27 | -0.26375538  | 0.049 | 0.131 | 4.11E-23 | 1.1 |
| SMG1       | 1.75E-27 | 0.509890403  | 0.324 | 0.235 | 4.22E-23 | 1.1 |
| C21orf91-C | 1.77E-27 | -0.185255311 | 0.003 | 0.053 | 4.26E-23 | 1.1 |
| COX7B      | 1.81E-27 | 0.349768024  | 0.682 | 0.648 | 4.37E-23 | 1.1 |

|           |          |              |       |       |          |     |
|-----------|----------|--------------|-------|-------|----------|-----|
| ATP11A    | 1.83E-27 | -0.23735203  | 0.028 | 0.099 | 4.40E-23 | 1.1 |
| ITGB4     | 1.83E-27 | -0.252460289 | 0.01  | 0.069 | 4.41E-23 | 1.1 |
| NUP214    | 1.83E-27 | -0.223671874 | 0.027 | 0.096 | 4.42E-23 | 1.1 |
| TMBIM6    | 2.00E-27 | -0.41786464  | 0.738 | 0.822 | 4.83E-23 | 1.1 |
| UBXN4     | 2.09E-27 | -0.272333778 | 0.188 | 0.312 | 5.04E-23 | 1.1 |
| PPP1R13B  | 2.12E-27 | -0.276940204 | 0.068 | 0.157 | 5.11E-23 | 1.1 |
| NSRP1     | 2.33E-27 | -0.256348533 | 0.183 | 0.308 | 5.61E-23 | 1.1 |
| CDC42SE1  | 2.34E-27 | -0.263264282 | 0.085 | 0.181 | 5.65E-23 | 1.1 |
| TNFRSF11E | 2.50E-27 | -0.356837017 | 0.047 | 0.126 | 6.04E-23 | 1.1 |
| EMP1      | 2.67E-27 | 0.817672923  | 0.696 | 0.727 | 6.44E-23 | 1.1 |
| ALOX12-AS | 2.71E-27 | -0.257640295 | 0.021 | 0.087 | 6.53E-23 | 1.1 |
| FLOT2     | 2.95E-27 | -0.219144701 | 0.013 | 0.073 | 7.11E-23 | 1.1 |
| SNRPG     | 3.14E-27 | -0.302802686 | 0.432 | 0.585 | 7.58E-23 | 1.1 |
| SCAF4     | 3.34E-27 | 0.299127018  | 0.133 | 0.064 | 8.05E-23 | 1.1 |
| UEVLD     | 3.34E-27 | -0.201461679 | 0.017 | 0.08  | 8.05E-23 | 1.1 |
| RP11-577H | 3.49E-27 | -0.190785017 | 0.021 | 0.087 | 8.42E-23 | 1.1 |
| ERCC6L2   | 3.49E-27 | -0.23855246  | 0.035 | 0.108 | 8.42E-23 | 1.1 |
| CCNB1IP1  | 3.50E-27 | 0.42131508   | 0.431 | 0.346 | 8.44E-23 | 1.1 |
| TRNAU1AP  | 3.52E-27 | -0.253241006 | 0.183 | 0.306 | 8.48E-23 | 1.1 |
| SNX10     | 3.64E-27 | -0.213302227 | 0.011 | 0.069 | 8.79E-23 | 1.1 |
| ZNF407    | 3.78E-27 | -0.253427842 | 0.053 | 0.136 | 9.13E-23 | 1.1 |
| NEURL3    | 3.79E-27 | -0.243518452 | 0.016 | 0.078 | 9.14E-23 | 1.1 |
| SS18L2    | 3.88E-27 | -0.213159625 | 0.073 | 0.164 | 9.36E-23 | 1.1 |
| HERC2     | 4.07E-27 | -0.249368923 | 0.031 | 0.102 | 9.81E-23 | 1.1 |
| VPS36     | 4.14E-27 | -0.251070989 | 0.049 | 0.13  | 9.99E-23 | 1.1 |
| ABHD17C   | 4.15E-27 | -0.233138397 | 0.018 | 0.081 | 1.00E-22 | 1.1 |
| HRSP12    | 4.17E-27 | -0.221930689 | 0.035 | 0.108 | 1.01E-22 | 1.1 |
| ARL4A     | 4.28E-27 | 0.419528628  | 0.194 | 0.111 | 1.03E-22 | 1.1 |
| EXOC6     | 4.51E-27 | -0.251914194 | 0.028 | 0.098 | 1.09E-22 | 1.1 |
| PLOD2     | 4.64E-27 | -0.325084492 | 0.089 | 0.185 | 1.12E-22 | 1.1 |
| EIF2AK2   | 4.65E-27 | -0.241785332 | 0.048 | 0.128 | 1.12E-22 | 1.1 |
| DCLRE1C   | 4.67E-27 | -0.200474394 | 0.023 | 0.09  | 1.13E-22 | 1.1 |
| RP11-66B2 | 4.71E-27 | -0.265874161 | 0.045 | 0.122 | 1.14E-22 | 1.1 |
| GLIS3     | 4.83E-27 | -0.236985904 | 0.189 | 0.322 | 1.17E-22 | 1.1 |
| ZNF22     | 4.83E-27 | -0.255514648 | 0.151 | 0.265 | 1.17E-22 | 1.1 |
| TRIM44    | 5.31E-27 | -0.235460538 | 0.08  | 0.173 | 1.28E-22 | 1.1 |
| ADAM32    | 5.56E-27 | -0.29326102  | 0.061 | 0.147 | 1.34E-22 | 1.1 |
| WDR48     | 5.74E-27 | 0.410686159  | 0.251 | 0.163 | 1.39E-22 | 1.1 |
| ATAD2B    | 5.90E-27 | -0.261494663 | 0.083 | 0.177 | 1.42E-22 | 1.1 |
| BPGM      | 6.22E-27 | -0.263894014 | 0.093 | 0.191 | 1.50E-22 | 1.1 |
| MSI2      | 6.82E-27 | -0.305601152 | 0.12  | 0.226 | 1.65E-22 | 1.1 |
| TTC28     | 7.47E-27 | -0.283230311 | 0.039 | 0.114 | 1.80E-22 | 1.1 |
| TMEM33    | 7.56E-27 | -0.214490241 | 0.037 | 0.111 | 1.82E-22 | 1.1 |
| EVL       | 7.95E-27 | -0.245538204 | 0.016 | 0.078 | 1.92E-22 | 1.1 |
| GABRE     | 8.01E-27 | -0.201199303 | 0.018 | 0.08  | 1.93E-22 | 1.1 |
| SLC38A9   | 8.57E-27 | -0.224862401 | 0.016 | 0.077 | 2.07E-22 | 1.1 |
| PRKDC     | 8.61E-27 | -0.249192009 | 0.053 | 0.136 | 2.08E-22 | 1.1 |

|           |          |              |       |       |          |     |
|-----------|----------|--------------|-------|-------|----------|-----|
| ZNF131    | 8.67E-27 | -0.276776984 | 0.075 | 0.165 | 2.09E-22 | 1.1 |
| MDM4      | 9.04E-27 | -0.311618483 | 0.184 | 0.303 | 2.18E-22 | 1.1 |
| ATP6V1B2  | 9.67E-27 | -0.28655132  | 0.083 | 0.176 | 2.33E-22 | 1.1 |
| FCHO2     | 9.83E-27 | -0.252148906 | 0.081 | 0.174 | 2.37E-22 | 1.1 |
| MRPS14    | 1.02E-26 | -0.218161745 | 0.088 | 0.185 | 2.47E-22 | 1.1 |
| C5orf17   | 1.03E-26 | -0.279772989 | 0.019 | 0.082 | 2.48E-22 | 1.1 |
| MFAP1     | 1.07E-26 | -0.222433818 | 0.088 | 0.184 | 2.58E-22 | 1.1 |
| TTC9C     | 1.09E-26 | -0.239378142 | 0.081 | 0.174 | 2.63E-22 | 1.1 |
| MORN2     | 1.17E-26 | 0.242349869  | 0.095 | 0.038 | 2.82E-22 | 1.1 |
| SLC18B1   | 1.18E-26 | -0.273306695 | 0.122 | 0.23  | 2.86E-22 | 1.1 |
| ATP5E     | 1.21E-26 | -0.296222753 | 0.359 | 0.496 | 2.91E-22 | 1.1 |
| TM4SF18   | 1.26E-26 | -0.31312749  | 0.035 | 0.106 | 3.05E-22 | 1.1 |
| MAP2K6    | 1.33E-26 | 0.19886971   | 0.064 | 0.02  | 3.20E-22 | 1.1 |
| ARHGAP5   | 1.34E-26 | -0.260381715 | 0.286 | 0.426 | 3.23E-22 | 1.1 |
| TLN2      | 1.35E-26 | -0.297457151 | 0.047 | 0.125 | 3.26E-22 | 1.1 |
| TPRG1     | 1.43E-26 | -0.273742127 | 0.038 | 0.113 | 3.44E-22 | 1.1 |
| ODF2L     | 1.44E-26 | -0.294926357 | 0.076 | 0.165 | 3.47E-22 | 1.1 |
| PPARA     | 1.47E-26 | -0.221012396 | 0.028 | 0.097 | 3.54E-22 | 1.1 |
| LLGL2     | 1.49E-26 | -0.219148854 | 0.029 | 0.099 | 3.60E-22 | 1.1 |
| KLHL20    | 1.51E-26 | -0.222251853 | 0.025 | 0.092 | 3.64E-22 | 1.1 |
| LSAMP     | 1.58E-26 | -0.284786055 | 0.163 | 0.28  | 3.80E-22 | 1.1 |
| ACAP2     | 1.60E-26 | -0.26027475  | 0.085 | 0.179 | 3.85E-22 | 1.1 |
| RHBDF2    | 1.66E-26 | -0.220349638 | 0.02  | 0.084 | 4.00E-22 | 1.1 |
| DLG2      | 1.69E-26 | -0.33364017  | 0.095 | 0.193 | 4.08E-22 | 1.1 |
| ACTR3C    | 1.88E-26 | -0.19912307  | 0.009 | 0.064 | 4.52E-22 | 1.1 |
| IDE       | 2.03E-26 | -0.215738549 | 0.027 | 0.094 | 4.90E-22 | 1.1 |
| ACO1      | 2.46E-26 | -0.198608309 | 0.015 | 0.074 | 5.93E-22 | 1.1 |
| ATG10     | 2.47E-26 | -0.292146969 | 0.075 | 0.164 | 5.96E-22 | 1.1 |
| EIF3M     | 2.50E-26 | 0.414690542  | 0.526 | 0.473 | 6.03E-22 | 1.1 |
| WDPCP     | 2.55E-26 | -0.278694244 | 0.082 | 0.175 | 6.16E-22 | 1.1 |
| AC008074. | 2.75E-26 | -0.221646525 | 0.03  | 0.1   | 6.64E-22 | 1.1 |
| PDE1C     | 2.82E-26 | -0.292211078 | 0.03  | 0.099 | 6.80E-22 | 1.1 |
| KLHL2     | 2.94E-26 | -0.247184785 | 0.02  | 0.084 | 7.10E-22 | 1.1 |
| GRB14     | 3.06E-26 | 0.441632462  | 0.613 | 0.544 | 7.38E-22 | 1.1 |
| HNRNPD    | 3.11E-26 | 0.42226845   | 0.354 | 0.266 | 7.50E-22 | 1.1 |
| NLGN4X    | 3.29E-26 | -0.248256164 | 0.028 | 0.097 | 7.92E-22 | 1.1 |
| EPC2      | 3.33E-26 | -0.194515641 | 0.018 | 0.081 | 8.03E-22 | 1.1 |
| TAOK1     | 3.34E-26 | -0.268222334 | 0.168 | 0.285 | 8.05E-22 | 1.1 |
| EPB42     | 3.54E-26 | 0.27548417   | 0.961 | 0.915 | 8.53E-22 | 1.1 |
| PGK1      | 3.56E-26 | -0.379722317 | 0.564 | 0.683 | 8.58E-22 | 1.1 |
| DOCK9     | 3.67E-26 | -0.233824044 | 0.096 | 0.194 | 8.86E-22 | 1.1 |
| HLCS      | 3.94E-26 | -0.251634816 | 0.034 | 0.104 | 9.50E-22 | 1.1 |
| KHDRBS1   | 4.19E-26 | 0.424893604  | 0.36  | 0.27  | 1.01E-21 | 1.1 |
| CTDSP2    | 4.30E-26 | -0.24444026  | 0.114 | 0.216 | 1.04E-21 | 1.1 |
| USP13     | 4.38E-26 | -0.230471256 | 0.038 | 0.111 | 1.06E-21 | 1.1 |
| CNDP2     | 4.45E-26 | -0.258146027 | 0.046 | 0.123 | 1.07E-21 | 1.1 |
| NACA2     | 4.52E-26 | 0.417142642  | 0.662 | 0.628 | 1.09E-21 | 1.1 |

|           |          |              |       |       |          |     |
|-----------|----------|--------------|-------|-------|----------|-----|
| PM20D2    | 4.93E-26 | -0.244135267 | 0.071 | 0.16  | 1.19E-21 | 1.1 |
| MFSD14C   | 5.03E-26 | -0.252242233 | 0.137 | 0.247 | 1.21E-21 | 1.1 |
| RP11-631N | 5.06E-26 | -0.223858978 | 0.025 | 0.091 | 1.22E-21 | 1.1 |
| ZNF480    | 5.08E-26 | -0.184182606 | 0.011 | 0.067 | 1.23E-21 | 1.1 |
| SMARCA1   | 5.33E-26 | -0.276595441 | 0.08  | 0.169 | 1.29E-21 | 1.1 |
| RAB10     | 5.67E-26 | -0.2615679   | 0.189 | 0.31  | 1.37E-21 | 1.1 |
| FBXL5     | 5.78E-26 | -0.228176389 | 0.066 | 0.152 | 1.39E-21 | 1.1 |
| HDAC7     | 6.00E-26 | -0.282517079 | 0.068 | 0.154 | 1.45E-21 | 1.1 |
| EXOC2     | 6.00E-26 | -0.198599513 | 0.025 | 0.091 | 1.45E-21 | 1.1 |
| FUT8      | 6.07E-26 | -0.264849921 | 0.039 | 0.112 | 1.46E-21 | 1.1 |
| MAP2K4    | 6.26E-26 | -0.321110208 | 0.271 | 0.402 | 1.51E-21 | 1.1 |
| SQLE      | 6.49E-26 | -0.172529815 | 0.013 | 0.071 | 1.56E-21 | 1.1 |
| CYP27B1   | 6.81E-26 | -0.187431927 | 0.005 | 0.056 | 1.64E-21 | 1.1 |
| COBLL1    | 7.11E-26 | -0.306167966 | 0.068 | 0.152 | 1.71E-21 | 1.1 |
| TLDC1     | 7.25E-26 | -0.205785888 | 0.048 | 0.127 | 1.75E-21 | 1.1 |
| ZNF438    | 7.32E-26 | -0.222740131 | 0.023 | 0.087 | 1.77E-21 | 1.1 |
| PPP2R3C   | 7.73E-26 | -0.210994205 | 0.036 | 0.108 | 1.86E-21 | 1.1 |
| FRMD5     | 7.79E-26 | -0.314611457 | 0.098 | 0.195 | 1.88E-21 | 1.1 |
| RP11-417F | 8.26E-26 | -0.246074767 | 0.057 | 0.138 | 1.99E-21 | 1.1 |
| SQRDL     | 8.85E-26 | -0.267655156 | 0.11  | 0.208 | 2.13E-21 | 1.1 |
| PIK3IP1   | 9.03E-26 | -0.193047387 | 0.021 | 0.083 | 2.18E-21 | 1.1 |
| ELF1      | 9.25E-26 | 0.441914363  | 0.499 | 0.425 | 2.23E-21 | 1.1 |
| SRP9      | 9.50E-26 | -0.23985579  | 0.305 | 0.446 | 2.29E-21 | 1.1 |
| TBC1D3P1  | 9.65E-26 | 0.357094579  | 0.757 | 0.749 | 2.33E-21 | 1.1 |
| KIAA1671  | 9.81E-26 | -0.29582688  | 0.109 | 0.21  | 2.37E-21 | 1.1 |
| PALLD     | 9.82E-26 | -0.29186913  | 0.408 | 0.553 | 2.37E-21 | 1.1 |
| FAM196A   | 9.94E-26 | -0.200763803 | 0.021 | 0.085 | 2.40E-21 | 1.1 |
| EPB41L1   | 1.09E-25 | -0.283209223 | 0.048 | 0.124 | 2.63E-21 | 1.1 |
| SECISBP2  | 1.11E-25 | -0.17887551  | 0.03  | 0.098 | 2.67E-21 | 1.1 |
| GSDMC     | 1.11E-25 | -0.160386352 | 0.003 | 0.05  | 2.67E-21 | 1.1 |
| CKAP4     | 1.11E-25 | -0.240183738 | 0.095 | 0.191 | 2.69E-21 | 1.1 |
| CXCL3     | 1.17E-25 | 0.517347321  | 0.143 | 0.073 | 2.82E-21 | 1.1 |
| CBWD7     | 1.25E-25 | -0.20723817  | 0.026 | 0.092 | 3.02E-21 | 1.1 |
| MAPKAP1   | 1.36E-25 | -0.234359379 | 0.044 | 0.119 | 3.27E-21 | 1.1 |
| RPS20     | 1.48E-25 | 0.365015261  | 0.962 | 0.955 | 3.57E-21 | 1.1 |
| CHKA      | 1.48E-25 | -0.24558513  | 0.063 | 0.147 | 3.57E-21 | 1.1 |
| ALDH1A3   | 1.50E-25 | -0.385164806 | 0.439 | 0.578 | 3.62E-21 | 1.1 |
| H6PD      | 1.52E-25 | -0.190967061 | 0.01  | 0.064 | 3.67E-21 | 1.1 |
| STX17     | 1.53E-25 | -0.239023646 | 0.077 | 0.166 | 3.68E-21 | 1.1 |
| FGD6      | 1.56E-25 | -0.315134697 | 0.17  | 0.282 | 3.76E-21 | 1.1 |
| ARHGAP24  | 1.56E-25 | -0.260584602 | 0.009 | 0.063 | 3.76E-21 | 1.1 |
| USP40     | 1.60E-25 | -0.215908694 | 0.023 | 0.087 | 3.86E-21 | 1.1 |
| NFATC2IP  | 1.71E-25 | -0.202742699 | 0.026 | 0.091 | 4.11E-21 | 1.1 |
| IL22RA2   | 1.72E-25 | 0.131854709  | 0.043 | 0.01  | 4.14E-21 | 1.1 |
| AGO3      | 1.79E-25 | -0.265749227 | 0.164 | 0.278 | 4.32E-21 | 1.1 |
| NFKBIZ    | 1.86E-25 | 0.337433527  | 0.796 | 0.797 | 4.48E-21 | 1.1 |
| PTPN3     | 1.87E-25 | -0.190417755 | 0.024 | 0.089 | 4.52E-21 | 1.1 |

|           |          |              |       |       |          |     |
|-----------|----------|--------------|-------|-------|----------|-----|
| LINC00998 | 1.88E-25 | -0.247900104 | 0.098 | 0.194 | 4.54E-21 | 1.1 |
| PIM1      | 2.12E-25 | 0.178494558  | 0.057 | 0.017 | 5.12E-21 | 1.1 |
| ITGB1     | 2.16E-25 | 0.519735008  | 0.416 | 0.335 | 5.20E-21 | 1.1 |
| TRAPPC10  | 2.17E-25 | -0.206776947 | 0.035 | 0.106 | 5.24E-21 | 1.1 |
| TCF20     | 2.24E-25 | -0.23404335  | 0.053 | 0.132 | 5.39E-21 | 1.1 |
| TMEM51    | 2.61E-25 | -0.235459214 | 0.103 | 0.201 | 6.29E-21 | 1.1 |
| KCNQ3     | 2.64E-25 | -0.268139029 | 0.013 | 0.07  | 6.37E-21 | 1.1 |
| CMTM4     | 2.72E-25 | -0.242983595 | 0.046 | 0.122 | 6.56E-21 | 1.1 |
| MFSD11    | 2.72E-25 | -0.213965493 | 0.025 | 0.089 | 6.56E-21 | 1.1 |
| AK3       | 2.76E-25 | -0.228147525 | 0.07  | 0.155 | 6.65E-21 | 1.1 |
| RP1-122P2 | 2.77E-25 | -0.172369058 | 0.002 | 0.047 | 6.68E-21 | 1.1 |
| TUBB      | 2.84E-25 | -0.318379382 | 0.258 | 0.382 | 6.84E-21 | 1.1 |
| ITCH      | 2.88E-25 | -0.212190936 | 0.254 | 0.391 | 6.94E-21 | 1.1 |
| TSC22D1   | 3.01E-25 | -0.323555268 | 0.173 | 0.286 | 7.26E-21 | 1.1 |
| CYP20A1   | 3.52E-25 | -0.217568118 | 0.023 | 0.086 | 8.48E-21 | 1.1 |
| MIR222HG  | 3.58E-25 | 0.358299555  | 0.15  | 0.079 | 8.64E-21 | 1.1 |
| CCDC59    | 3.84E-25 | 0.364028614  | 0.244 | 0.158 | 9.25E-21 | 1.1 |
| EMC3      | 3.95E-25 | -0.249862838 | 0.09  | 0.181 | 9.52E-21 | 1.1 |
| FAM135A   | 3.96E-25 | -0.231768437 | 0.033 | 0.101 | 9.54E-21 | 1.1 |
| LMBRD1    | 4.06E-25 | 0.389671942  | 0.305 | 0.215 | 9.78E-21 | 1.1 |
| ERC1      | 4.16E-25 | -0.247700418 | 0.206 | 0.328 | 1.00E-20 | 1.1 |
| TNFRSF1B  | 4.20E-25 | -0.211146773 | 0.026 | 0.091 | 1.01E-20 | 1.1 |
| CD47      | 4.33E-25 | -0.261158547 | 0.331 | 0.475 | 1.04E-20 | 1.1 |
| CCDC66    | 4.35E-25 | -0.236593136 | 0.085 | 0.176 | 1.05E-20 | 1.1 |
| DNAJC1    | 4.81E-25 | -0.275891028 | 0.13  | 0.235 | 1.16E-20 | 1.1 |
| LYPLA1    | 5.04E-25 | -0.241820349 | 0.051 | 0.128 | 1.21E-20 | 1.1 |
| TMEM65    | 5.07E-25 | -0.243465124 | 0.107 | 0.206 | 1.22E-20 | 1.1 |
| ZFYVE9    | 5.28E-25 | -0.243386268 | 0.053 | 0.13  | 1.27E-20 | 1.1 |
| CNTNAP3   | 5.40E-25 | -0.196573419 | 0.018 | 0.078 | 1.30E-20 | 1.1 |
| MSRA      | 5.73E-25 | -0.224714197 | 0.023 | 0.086 | 1.38E-20 | 1.1 |
| FGFBP1    | 5.75E-25 | -0.381423294 | 0.027 | 0.092 | 1.39E-20 | 1.1 |
| CBWD5     | 5.93E-25 | -0.227932295 | 0.107 | 0.206 | 1.43E-20 | 1.1 |
| RARS      | 5.99E-25 | -0.240255354 | 0.197 | 0.319 | 1.44E-20 | 1.1 |
| RNF217    | 6.12E-25 | -0.237354828 | 0.042 | 0.114 | 1.47E-20 | 1.1 |
| RBFOX2    | 6.52E-25 | 0.307990503  | 0.978 | 0.959 | 1.57E-20 | 1.1 |
| ZDHHC20   | 6.90E-25 | -0.243944917 | 0.084 | 0.173 | 1.66E-20 | 1.1 |
| TMEM161F  | 7.75E-25 | -0.241535467 | 0.045 | 0.119 | 1.87E-20 | 1.1 |
| ZFR       | 7.93E-25 | -0.248373166 | 0.281 | 0.417 | 1.91E-20 | 1.1 |
| CYB5R2    | 8.45E-25 | -0.186542425 | 0.018 | 0.077 | 2.04E-20 | 1.1 |
| B4GALT6   | 8.62E-25 | -0.17066825  | 0.005 | 0.053 | 2.08E-20 | 1.1 |
| XPR1      | 8.68E-25 | -0.237314677 | 0.062 | 0.144 | 2.09E-20 | 1.1 |
| ANXA2     | 8.79E-25 | 0.223815242  | 0.93  | 0.916 | 2.12E-20 | 1.1 |
| SND1      | 8.92E-25 | -0.272582491 | 0.224 | 0.353 | 2.15E-20 | 1.1 |
| RUSC2     | 1.00E-24 | 0.367854557  | 0.176 | 0.101 | 2.42E-20 | 1.1 |
| IREB2     | 1.01E-24 | -0.210424138 | 0.027 | 0.092 | 2.43E-20 | 1.1 |
| SLC6A16   | 1.04E-24 | -0.179310137 | 0.009 | 0.061 | 2.52E-20 | 1.1 |
| HSDL2     | 1.08E-24 | -0.221774527 | 0.05  | 0.127 | 2.60E-20 | 1.1 |



|           |          |              |       |       |          |     |
|-----------|----------|--------------|-------|-------|----------|-----|
| MT2A      | 1.09E-24 | -1.152123782 | 0.028 | 0.092 | 2.62E-20 | 1.1 |
| DENND1B   | 1.20E-24 | -0.260213799 | 0.07  | 0.155 | 2.90E-20 | 1.1 |
| DDX58     | 1.21E-24 | -0.222793676 | 0.029 | 0.095 | 2.92E-20 | 1.1 |
| GLTP      | 1.25E-24 | -0.23356107  | 0.106 | 0.203 | 3.00E-20 | 1.1 |
| CARHSP1   | 1.29E-24 | -0.350673641 | 0.189 | 0.303 | 3.10E-20 | 1.1 |
| KIAA0556  | 1.32E-24 | -0.214442533 | 0.036 | 0.107 | 3.18E-20 | 1.1 |
| MRPS6     | 1.34E-24 | -0.333304272 | 0.118 | 0.218 | 3.23E-20 | 1.1 |
| TUG1      | 1.37E-24 | -0.238357782 | 0.059 | 0.139 | 3.29E-20 | 1.1 |
| CBFA2T2   | 1.37E-24 | -0.242805767 | 0.078 | 0.163 | 3.30E-20 | 1.1 |
| RP11-96H1 | 1.41E-24 | -0.299119271 | 0.056 | 0.134 | 3.40E-20 | 1.1 |
| PHF11     | 1.48E-24 | -0.197629815 | 0.032 | 0.099 | 3.56E-20 | 1.1 |
| CAAP1     | 1.54E-24 | -0.19565186  | 0.018 | 0.077 | 3.71E-20 | 1.1 |
| ZNF251    | 1.58E-24 | -0.181870076 | 0.008 | 0.058 | 3.80E-20 | 1.1 |
| WBP1L     | 1.75E-24 | -0.210594827 | 0.02  | 0.079 | 4.22E-20 | 1.1 |
| MFSD8     | 1.79E-24 | -0.189294542 | 0.014 | 0.069 | 4.30E-20 | 1.1 |
| MICU1     | 1.79E-24 | -0.280464405 | 0.141 | 0.246 | 4.31E-20 | 1.1 |
| TMED3     | 1.81E-24 | -0.221123453 | 0.025 | 0.087 | 4.38E-20 | 1.1 |
| DCAF10    | 1.90E-24 | -0.225360424 | 0.114 | 0.213 | 4.57E-20 | 1.1 |
| COMMD10   | 1.95E-24 | -0.27380583  | 0.135 | 0.237 | 4.70E-20 | 1.1 |
| FAM78B    | 1.97E-24 | -0.261420647 | 0.027 | 0.09  | 4.75E-20 | 1.1 |
| CSRP1     | 2.01E-24 | 0.306790347  | 0.196 | 0.116 | 4.85E-20 | 1.1 |
| KIZ-AS1   | 2.01E-24 | 0.288021301  | 0.925 | 0.879 | 4.85E-20 | 1.1 |
| ANKRD49   | 2.07E-24 | -0.168589574 | 0.019 | 0.078 | 4.98E-20 | 1.1 |
| HLA-A     | 2.10E-24 | -0.300755305 | 0.239 | 0.363 | 5.06E-20 | 1.1 |
| TEFM      | 2.13E-24 | -0.179522424 | 0.011 | 0.064 | 5.13E-20 | 1.1 |
| IRF2      | 2.25E-24 | -0.251054727 | 0.209 | 0.329 | 5.44E-20 | 1.1 |
| DDX52     | 2.29E-24 | -0.205192604 | 0.056 | 0.134 | 5.53E-20 | 1.1 |
| SLC35F5   | 2.31E-24 | -0.247656936 | 0.047 | 0.121 | 5.56E-20 | 1.1 |
| PDXDC1    | 2.33E-24 | -0.213865445 | 0.208 | 0.331 | 5.61E-20 | 1.1 |
| SEMA4B    | 2.37E-24 | -0.303442582 | 0.097 | 0.188 | 5.72E-20 | 1.1 |
| CDC42     | 2.54E-24 | 0.333560226  | 0.722 | 0.694 | 6.13E-20 | 1.1 |
| NARS2     | 2.67E-24 | -0.21924802  | 0.02  | 0.079 | 6.43E-20 | 1.1 |
| MVP       | 2.68E-24 | -0.20870217  | 0.023 | 0.085 | 6.46E-20 | 1.1 |
| RP11-68E1 | 2.81E-24 | 0.255793802  | 0.094 | 0.04  | 6.77E-20 | 1.1 |
| AHCYL2    | 2.81E-24 | -0.23812614  | 0.032 | 0.099 | 6.78E-20 | 1.1 |
| SMC1A     | 2.84E-24 | -0.198183761 | 0.031 | 0.097 | 6.84E-20 | 1.1 |
| ZYG11B    | 2.85E-24 | -0.208471023 | 0.028 | 0.092 | 6.87E-20 | 1.1 |
| CARD6     | 3.16E-24 | -0.171171281 | 0.014 | 0.069 | 7.61E-20 | 1.1 |
| ZEB1      | 3.22E-24 | -0.222708546 | 0.011 | 0.063 | 7.75E-20 | 1.1 |
| AC013461. | 3.26E-24 | -0.218945021 | 0.135 | 0.238 | 7.86E-20 | 1.1 |
| RAD9A     | 3.31E-24 | -0.236769666 | 0.05  | 0.126 | 7.99E-20 | 1.1 |
| TTF1      | 3.48E-24 | -0.205648108 | 0.063 | 0.144 | 8.38E-20 | 1.1 |
| SP100     | 3.48E-24 | -0.281180378 | 0.085 | 0.172 | 8.39E-20 | 1.1 |
| CEP295    | 3.48E-24 | -0.179793323 | 0.017 | 0.074 | 8.40E-20 | 1.1 |
| SSR2      | 3.83E-24 | 0.310687068  | 0.765 | 0.764 | 9.23E-20 | 1.1 |
| RNMT      | 4.01E-24 | 0.473630219  | 0.426 | 0.354 | 9.67E-20 | 1.1 |
| GPATCH2L  | 4.18E-24 | -0.239639137 | 0.064 | 0.144 | 1.01E-19 | 1.1 |

|           |          |              |       |       |          |     |
|-----------|----------|--------------|-------|-------|----------|-----|
| MFN1      | 4.18E-24 | -0.222510031 | 0.086 | 0.175 | 1.01E-19 | 1.1 |
| NCOA7     | 4.25E-24 | -0.258604558 | 0.573 | 0.71  | 1.02E-19 | 1.1 |
| PNPLA3    | 4.88E-24 | -0.180830374 | 0.004 | 0.05  | 1.18E-19 | 1.1 |
| AC005152. | 4.99E-24 | -0.456665242 | 0.103 | 0.193 | 1.20E-19 | 1.1 |
| ENOX2     | 5.14E-24 | -0.227721522 | 0.015 | 0.071 | 1.24E-19 | 1.1 |
| TRIP11    | 5.30E-24 | -0.221879718 | 0.087 | 0.176 | 1.28E-19 | 1.1 |
| LCN2      | 5.45E-24 | -0.311840256 | 0.003 | 0.048 | 1.32E-19 | 1.1 |
| PSMA5     | 5.51E-24 | -0.251864734 | 0.142 | 0.245 | 1.33E-19 | 1.1 |
| DDX3X     | 5.52E-24 | -0.245353337 | 0.207 | 0.326 | 1.33E-19 | 1.1 |
| ARGLU1    | 6.34E-24 | -0.258795844 | 0.107 | 0.202 | 1.53E-19 | 1.1 |
| PPP6R2    | 6.49E-24 | -0.22010808  | 0.05  | 0.126 | 1.57E-19 | 1.1 |
| PARP1     | 6.51E-24 | -0.202771178 | 0.038 | 0.107 | 1.57E-19 | 1.1 |
| ACTN4     | 6.69E-24 | 0.397344941  | 0.399 | 0.312 | 1.61E-19 | 1.1 |
| RAPH1     | 6.75E-24 | -0.250944252 | 0.12  | 0.219 | 1.63E-19 | 1.1 |
| CEBPZ     | 6.81E-24 | -0.222789153 | 0.106 | 0.202 | 1.64E-19 | 1.1 |
| WIPF2     | 7.30E-24 | -0.205112676 | 0.05  | 0.125 | 1.76E-19 | 1.1 |
| CBFB      | 8.10E-24 | -0.226733228 | 0.058 | 0.135 | 1.95E-19 | 1.1 |
| RHOQ      | 8.19E-24 | -0.240327643 | 0.211 | 0.33  | 1.98E-19 | 1.1 |
| LINC00342 | 8.28E-24 | -0.204235024 | 0.021 | 0.08  | 2.00E-19 | 1.1 |
| PRDX3     | 9.08E-24 | 0.34719541   | 0.209 | 0.13  | 2.19E-19 | 1.1 |
| SYNM      | 9.51E-24 | -0.345645015 | 0.093 | 0.182 | 2.29E-19 | 1.1 |
| SLC36A4   | 9.83E-24 | -0.200238423 | 0.025 | 0.086 | 2.37E-19 | 1.1 |
| LINC01235 | 9.95E-24 | -0.274444668 | 0.124 | 0.223 | 2.40E-19 | 1.1 |
| FAM213A   | 1.03E-23 | -0.195526187 | 0.031 | 0.096 | 2.49E-19 | 1.1 |
| HP1BP3    | 1.10E-23 | -0.21646513  | 0.123 | 0.223 | 2.64E-19 | 1.1 |
| AZGP1     | 1.10E-23 | -0.471925682 | 0.254 | 0.372 | 2.65E-19 | 1.1 |
| YLPM1     | 1.10E-23 | -0.208839339 | 0.068 | 0.148 | 2.66E-19 | 1.1 |
| HSPG2     | 1.15E-23 | -0.237508579 | 0.06  | 0.138 | 2.76E-19 | 1.1 |
| SAV1      | 1.22E-23 | -0.266673218 | 0.283 | 0.409 | 2.93E-19 | 1.1 |
| SLC25A13  | 1.23E-23 | -0.231499289 | 0.027 | 0.089 | 2.96E-19 | 1.1 |
| MAN1A1    | 1.26E-23 | -0.23905412  | 0.076 | 0.161 | 3.03E-19 | 1.1 |
| ZNF33B    | 1.28E-23 | -0.281250074 | 0.116 | 0.21  | 3.09E-19 | 1.1 |
| SMIM8     | 1.36E-23 | -0.20647248  | 0.039 | 0.108 | 3.29E-19 | 1.1 |
| RPF2      | 1.39E-23 | 0.371395685  | 0.243 | 0.161 | 3.35E-19 | 1.1 |
| CMC1      | 1.51E-23 | -0.179122391 | 0.012 | 0.064 | 3.63E-19 | 1.1 |
| FBXW11    | 1.54E-23 | -0.196634076 | 0.233 | 0.356 | 3.71E-19 | 1.1 |
| CSF1      | 1.57E-23 | -0.259174224 | 0.039 | 0.107 | 3.80E-19 | 1.1 |
| WDR7      | 1.72E-23 | -0.185119914 | 0.013 | 0.066 | 4.15E-19 | 1.1 |
| RAB12     | 1.78E-23 | -0.232375778 | 0.124 | 0.223 | 4.30E-19 | 1.1 |
| CCDC122   | 1.79E-23 | -0.180032072 | 0.011 | 0.062 | 4.33E-19 | 1.1 |
| NCOA6     | 1.94E-23 | -0.245968896 | 0.089 | 0.177 | 4.68E-19 | 1.1 |
| SETD7     | 1.96E-23 | -0.215307524 | 0.053 | 0.127 | 4.72E-19 | 1.1 |
| RBL2      | 2.02E-23 | -0.210072106 | 0.045 | 0.116 | 4.87E-19 | 1.1 |
| CLTA      | 2.10E-23 | -0.216163321 | 0.093 | 0.184 | 5.06E-19 | 1.1 |
| ANKRD6    | 2.12E-23 | -0.2303936   | 0.038 | 0.106 | 5.12E-19 | 1.1 |
| ARHGEF11  | 2.18E-23 | -0.18451522  | 0.012 | 0.064 | 5.25E-19 | 1.1 |
| FZD7      | 2.22E-23 | -0.215382998 | 0.032 | 0.096 | 5.35E-19 | 1.1 |

|           |          |              |       |       |          |     |
|-----------|----------|--------------|-------|-------|----------|-----|
| ECHDC2    | 2.23E-23 | -0.231519546 | 0.06  | 0.137 | 5.37E-19 | 1.1 |
| ZNF567    | 2.38E-23 | -0.161362802 | 0.016 | 0.072 | 5.75E-19 | 1.1 |
| LINC01344 | 2.40E-23 | -0.19709595  | 0.007 | 0.055 | 5.79E-19 | 1.1 |
| IFT43     | 2.42E-23 | -0.220814882 | 0.035 | 0.102 | 5.82E-19 | 1.1 |
| ZCCHC10   | 2.44E-23 | -0.193301222 | 0.048 | 0.121 | 5.87E-19 | 1.1 |
| HSPA9     | 2.46E-23 | 0.386149085  | 0.272 | 0.189 | 5.93E-19 | 1.1 |
| ARL17A    | 2.48E-23 | -0.190400616 | 0.021 | 0.079 | 5.98E-19 | 1.1 |
| LINC00475 | 2.55E-23 | -0.219020512 | 0.036 | 0.104 | 6.16E-19 | 1.1 |
| RP11-608O | 2.56E-23 | 0.312778282  | 0.747 | 0.733 | 6.18E-19 | 1.1 |
| IGSF3     | 2.57E-23 | -0.177828866 | 0.03  | 0.093 | 6.20E-19 | 1.1 |
| PGM1      | 2.63E-23 | -0.251100013 | 0.063 | 0.142 | 6.34E-19 | 1.1 |
| ANKRD13C  | 2.65E-23 | -0.22677111  | 0.065 | 0.145 | 6.39E-19 | 1.1 |
| ZNF720    | 2.76E-23 | -0.193908534 | 0.035 | 0.102 | 6.66E-19 | 1.1 |
| SLC30A6   | 2.82E-23 | -0.176979216 | 0.017 | 0.073 | 6.80E-19 | 1.1 |
| NMT1      | 3.05E-23 | -0.204566556 | 0.119 | 0.217 | 7.35E-19 | 1.1 |
| DOCK5     | 3.05E-23 | -0.238943035 | 0.142 | 0.247 | 7.35E-19 | 1.1 |
| ZNF529-AS | 3.17E-23 | -0.186410007 | 0.013 | 0.066 | 7.64E-19 | 1.1 |
| ANKS1A    | 3.25E-23 | -0.244884414 | 0.075 | 0.157 | 7.82E-19 | 1.1 |
| CHORDC1   | 3.38E-23 | -0.204582927 | 0.045 | 0.116 | 8.14E-19 | 1.1 |
| RAB28     | 3.40E-23 | -0.189235787 | 0.012 | 0.064 | 8.20E-19 | 1.1 |
| ARL8B     | 3.51E-23 | 0.449059954  | 0.314 | 0.231 | 8.48E-19 | 1.1 |
| FBXW4     | 3.56E-23 | -0.225451459 | 0.031 | 0.095 | 8.57E-19 | 1.1 |
| DCAF6     | 3.67E-23 | -0.184252946 | 0.346 | 0.495 | 8.84E-19 | 1.1 |
| RPL7L1    | 4.07E-23 | -0.215453971 | 0.073 | 0.154 | 9.82E-19 | 1.1 |
| FARP1     | 4.42E-23 | -0.239116776 | 0.221 | 0.345 | 1.07E-18 | 1.1 |
| CASP4     | 4.60E-23 | -0.256604158 | 0.206 | 0.321 | 1.11E-18 | 1.1 |
| IFITM2    | 5.09E-23 | -0.180526583 | 0.01  | 0.06  | 1.23E-18 | 1.1 |
| EIF2B5    | 5.54E-23 | 0.481046327  | 0.595 | 0.556 | 1.34E-18 | 1.1 |
| HMGB1     | 5.71E-23 | -0.268870393 | 0.445 | 0.574 | 1.38E-18 | 1.1 |
| PSMB5     | 5.91E-23 | -0.234746914 | 0.155 | 0.261 | 1.42E-18 | 1.1 |
| RP11-286E | 6.01E-23 | 0.281101581  | 0.103 | 0.047 | 1.45E-18 | 1.1 |
| ZNF141    | 6.12E-23 | -0.195992775 | 0.021 | 0.079 | 1.48E-18 | 1.1 |
| ARL17B    | 6.18E-23 | -0.273502389 | 0.031 | 0.095 | 1.49E-18 | 1.1 |
| S100PBP   | 6.61E-23 | -0.236961179 | 0.058 | 0.133 | 1.59E-18 | 1.1 |
| SPCS2     | 6.78E-23 | 0.401357328  | 0.376 | 0.294 | 1.64E-18 | 1.1 |
| PSPC1     | 6.87E-23 | -0.22332175  | 0.098 | 0.189 | 1.66E-18 | 1.1 |
| TMEM126F  | 7.08E-23 | -0.1946044   | 0.064 | 0.142 | 1.71E-18 | 1.1 |
| AIMP1     | 7.17E-23 | 0.414871983  | 0.476 | 0.402 | 1.73E-18 | 1.1 |
| BCL2A1    | 7.20E-23 | -0.489084548 | 0.095 | 0.181 | 1.74E-18 | 1.1 |
| RRAS2     | 7.54E-23 | -0.195932679 | 0.148 | 0.254 | 1.82E-18 | 1.1 |
| ZZZ3      | 7.60E-23 | -0.230181044 | 0.109 | 0.202 | 1.83E-18 | 1.1 |
| NTN4      | 7.69E-23 | -0.323599918 | 0.111 | 0.203 | 1.85E-18 | 1.1 |
| SEC24A    | 7.75E-23 | 0.476285256  | 0.276 | 0.197 | 1.87E-18 | 1.1 |
| BOC       | 7.97E-23 | -0.185225463 | 0.006 | 0.051 | 1.92E-18 | 1.1 |
| LRP11     | 8.00E-23 | -0.17421131  | 0.02  | 0.077 | 1.93E-18 | 1.1 |
| RPP38     | 8.16E-23 | -0.177961361 | 0.041 | 0.109 | 1.97E-18 | 1.1 |
| GALNT1    | 8.60E-23 | 0.398583611  | 0.206 | 0.131 | 2.07E-18 | 1.1 |

|           |          |              |       |       |          |     |
|-----------|----------|--------------|-------|-------|----------|-----|
| ZNF195    | 9.00E-23 | -0.209147697 | 0.058 | 0.134 | 2.17E-18 | 1.1 |
| PML       | 9.96E-23 | -0.229091755 | 0.06  | 0.135 | 2.40E-18 | 1.1 |
| FARS2     | 9.98E-23 | -0.238060871 | 0.036 | 0.101 | 2.41E-18 | 1.1 |
| AC007566. | 1.04E-22 | -0.155543843 | 0.007 | 0.053 | 2.50E-18 | 1.1 |
| PDS5A     | 1.06E-22 | -0.228074101 | 0.265 | 0.395 | 2.56E-18 | 1.1 |
| MT-CO3    | 1.07E-22 | -0.163537685 | 0.998 | 0.993 | 2.57E-18 | 1.1 |
| UBB       | 1.07E-22 | 0.404375726  | 0.781 | 0.774 | 2.58E-18 | 1.1 |
| MCTP1     | 1.14E-22 | -0.286095964 | 0.052 | 0.125 | 2.75E-18 | 1.1 |
| MAN2A1    | 1.25E-22 | -0.230575143 | 0.127 | 0.224 | 3.02E-18 | 1.1 |
| TANC1     | 1.28E-22 | -0.245351011 | 0.178 | 0.287 | 3.10E-18 | 1.1 |
| HIP1      | 1.32E-22 | -0.239187928 | 0.042 | 0.11  | 3.18E-18 | 1.1 |
| C21orf91  | 1.38E-22 | -0.193867137 | 0.023 | 0.081 | 3.33E-18 | 1.1 |
| CDC25B    | 1.41E-22 | -0.192538494 | 0.003 | 0.045 | 3.39E-18 | 1.1 |
| TNRC6A    | 1.50E-22 | 0.429213263  | 0.312 | 0.23  | 3.61E-18 | 1.1 |
| ORC3      | 1.50E-22 | -0.188463151 | 0.034 | 0.098 | 3.62E-18 | 1.1 |
| SNED1     | 1.52E-22 | -0.183171651 | 0.018 | 0.073 | 3.66E-18 | 1.1 |
| MAT2A     | 1.56E-22 | -0.206452872 | 0.021 | 0.077 | 3.76E-18 | 1.1 |
| PSMB2     | 1.57E-22 | -0.210968081 | 0.078 | 0.161 | 3.80E-18 | 1.1 |
| KRT19     | 1.58E-22 | 0.561132734  | 0.376 | 0.296 | 3.80E-18 | 1.1 |
| PURA      | 1.60E-22 | -0.188602458 | 0.023 | 0.081 | 3.86E-18 | 1.1 |
| KIAA1033  | 1.63E-22 | -0.231293161 | 0.053 | 0.127 | 3.94E-18 | 1.1 |
| NNT       | 1.69E-22 | -0.247570664 | 0.05  | 0.122 | 4.06E-18 | 1.1 |
| RAB27A    | 1.81E-22 | -0.20773943  | 0.03  | 0.091 | 4.36E-18 | 1.1 |
| VPS50     | 1.86E-22 | -0.190695144 | 0.018 | 0.073 | 4.48E-18 | 1.1 |
| MAP4K3    | 1.89E-22 | -0.241021386 | 0.108 | 0.202 | 4.56E-18 | 1.1 |
| POLE2     | 1.92E-22 | -0.22718805  | 0.138 | 0.242 | 4.64E-18 | 1.1 |
| ATP6V1E1  | 1.98E-22 | -0.232418895 | 0.195 | 0.309 | 4.77E-18 | 1.1 |
| HNRNPDL   | 2.03E-22 | 0.36131336   | 0.363 | 0.28  | 4.90E-18 | 1.1 |
| FAM32A    | 2.08E-22 | -0.161120433 | 0.027 | 0.086 | 5.01E-18 | 1.1 |
| PSMD1     | 2.10E-22 | -0.221385209 | 0.08  | 0.164 | 5.05E-18 | 1.1 |
| TAF15     | 2.14E-22 | -0.263486166 | 0.23  | 0.35  | 5.17E-18 | 1.1 |
| KIAA1958  | 2.15E-22 | -0.214632459 | 0.043 | 0.111 | 5.18E-18 | 1.1 |
| LINC00511 | 2.17E-22 | -0.280670446 | 0.064 | 0.141 | 5.23E-18 | 1.1 |
| RHPN2     | 2.30E-22 | -0.223077839 | 0.199 | 0.318 | 5.53E-18 | 1.1 |
| KIAA0232  | 2.48E-22 | -0.2222043   | 0.077 | 0.158 | 5.98E-18 | 1.1 |
| SNRNP35   | 2.56E-22 | -0.193044907 | 0.035 | 0.099 | 6.18E-18 | 1.1 |
| ESCO1     | 2.61E-22 | -0.191145397 | 0.047 | 0.117 | 6.29E-18 | 1.1 |
| CDK12     | 2.62E-22 | -0.211843969 | 0.05  | 0.121 | 6.31E-18 | 1.1 |
| UHRF1BP1I | 2.63E-22 | 0.383043429  | 0.253 | 0.173 | 6.33E-18 | 1.1 |
| TNFRSF10E | 2.75E-22 | 0.403593618  | 0.257 | 0.175 | 6.62E-18 | 1.1 |
| DNAJB14   | 2.80E-22 | -0.185191366 | 0.043 | 0.112 | 6.74E-18 | 1.1 |
| ZNF146    | 2.86E-22 | -0.219979516 | 0.063 | 0.138 | 6.90E-18 | 1.1 |
| KRT23     | 3.05E-22 | -0.35400033  | 0.167 | 0.27  | 7.36E-18 | 1.1 |
| VAPA      | 3.18E-22 | 0.368595207  | 0.521 | 0.466 | 7.68E-18 | 1.1 |
| PELI2     | 3.24E-22 | -0.224064953 | 0.04  | 0.107 | 7.82E-18 | 1.1 |
| C2orf88   | 3.34E-22 | 0.385604839  | 0.442 | 0.367 | 8.04E-18 | 1.1 |
| PHC2      | 3.38E-22 | -0.240248545 | 0.042 | 0.108 | 8.15E-18 | 1.1 |

|           |          |              |       |       |          |     |
|-----------|----------|--------------|-------|-------|----------|-----|
| TBC1D14   | 3.46E-22 | -0.204334439 | 0.031 | 0.093 | 8.35E-18 | 1.1 |
| RTTN      | 3.48E-22 | -0.189416234 | 0.025 | 0.083 | 8.39E-18 | 1.1 |
| ZNF292    | 3.52E-22 | 0.406029769  | 0.652 | 0.63  | 8.48E-18 | 1.1 |
| NIFK-AS1  | 4.17E-22 | -0.153540007 | 0.008 | 0.055 | 1.01E-17 | 1.1 |
| LINC00536 | 4.21E-22 | -0.231800812 | 0.033 | 0.095 | 1.02E-17 | 1.1 |
| BRIX1     | 4.26E-22 | 0.37792226   | 0.175 | 0.105 | 1.03E-17 | 1.1 |
| SLC19A2   | 4.79E-22 | 0.310960428  | 0.137 | 0.073 | 1.15E-17 | 1.1 |
| ARL5B     | 4.79E-22 | 0.283791059  | 0.115 | 0.057 | 1.15E-17 | 1.1 |
| CHMP5     | 4.84E-22 | -0.229954837 | 0.252 | 0.375 | 1.17E-17 | 1.1 |
| IL15RA    | 5.22E-22 | -0.213557595 | 0.018 | 0.072 | 1.26E-17 | 1.1 |
| TCF7L1    | 5.23E-22 | 0.502376979  | 0.39  | 0.316 | 1.26E-17 | 1.1 |
| SCFD1     | 5.36E-22 | -0.231780949 | 0.153 | 0.253 | 1.29E-17 | 1.1 |
| SYNPO2    | 5.87E-22 | 0.398809833  | 0.268 | 0.18  | 1.42E-17 | 1.1 |
| DARS      | 6.15E-22 | -0.238611676 | 0.242 | 0.363 | 1.48E-17 | 1.1 |
| ALDH1A2   | 6.28E-22 | -0.196157023 | 0.007 | 0.052 | 1.52E-17 | 1.1 |
| DBI       | 6.38E-22 | 0.426895346  | 0.709 | 0.689 | 1.54E-17 | 1.1 |
| HIST1H2BJ | 6.40E-22 | -0.206067796 | 0.043 | 0.11  | 1.54E-17 | 1.1 |
| ARFIP1    | 6.75E-22 | -0.220838363 | 0.089 | 0.173 | 1.63E-17 | 1.1 |
| PAFAH1B2  | 6.81E-22 | 0.389952329  | 0.291 | 0.212 | 1.64E-17 | 1.1 |
| VRK2      | 6.84E-22 | -0.206390728 | 0.113 | 0.205 | 1.65E-17 | 1.1 |
| CLK4      | 6.86E-22 | -0.156880532 | 0.024 | 0.082 | 1.66E-17 | 1.1 |
| STAMBP    | 7.03E-22 | -0.203728303 | 0.116 | 0.211 | 1.70E-17 | 1.1 |
| C20orf24  | 7.04E-22 | -0.162843947 | 0.023 | 0.08  | 1.70E-17 | 1.1 |
| RPAP2     | 7.05E-22 | -0.201862841 | 0.103 | 0.196 | 1.70E-17 | 1.1 |
| MAK       | 7.09E-22 | -0.19485125  | 0.04  | 0.107 | 1.71E-17 | 1.1 |
| TNPO1     | 7.16E-22 | -0.232990668 | 0.146 | 0.248 | 1.73E-17 | 1.1 |
| AKAP6     | 8.34E-22 | -0.1966527   | 0.015 | 0.066 | 2.01E-17 | 1.1 |
| MAP7D1    | 8.66E-22 | 0.349628762  | 0.186 | 0.114 | 2.09E-17 | 1.1 |
| WNK1      | 8.93E-22 | -0.217056951 | 0.114 | 0.207 | 2.15E-17 | 1.1 |
| TTC1      | 9.52E-22 | -0.224266048 | 0.241 | 0.358 | 2.30E-17 | 1.1 |
| RP11-511B | 9.64E-22 | 0.33207771   | 0.617 | 0.58  | 2.32E-17 | 1.1 |
| CCDC125   | 1.01E-21 | -0.205245944 | 0.025 | 0.082 | 2.43E-17 | 1.1 |
| CHSY1     | 1.04E-21 | 0.269189499  | 0.146 | 0.08  | 2.50E-17 | 1.1 |
| EP300     | 1.09E-21 | -0.222042615 | 0.083 | 0.165 | 2.63E-17 | 1.1 |
| RAB29     | 1.11E-21 | -0.1662184   | 0.035 | 0.098 | 2.68E-17 | 1.1 |
| IQCG      | 1.15E-21 | 0.426191044  | 0.277 | 0.197 | 2.78E-17 | 1.1 |
| STIL      | 1.18E-21 | -0.183208678 | 0.037 | 0.101 | 2.84E-17 | 1.1 |
| PLSCR2    | 1.20E-21 | -0.196306225 | 0.01  | 0.058 | 2.88E-17 | 1.1 |
| LCORL     | 1.23E-21 | -0.206379282 | 0.063 | 0.139 | 2.97E-17 | 1.1 |
| RP11-138A | 1.24E-21 | -0.170184703 | 0.065 | 0.144 | 2.99E-17 | 1.1 |
| ABI2      | 1.25E-21 | -0.216637408 | 0.089 | 0.173 | 3.01E-17 | 1.1 |
| TNRC18    | 1.29E-21 | -0.157945593 | 0.02  | 0.075 | 3.12E-17 | 1.1 |
| RP4-605O3 | 1.59E-21 | -0.21430133  | 0.048 | 0.117 | 3.84E-17 | 1.1 |
| FAM217B   | 1.61E-21 | -0.13634016  | 0.007 | 0.051 | 3.88E-17 | 1.1 |
| GRB2      | 1.69E-21 | -0.212421017 | 0.073 | 0.15  | 4.08E-17 | 1.1 |
| PHYKPL    | 1.75E-21 | -0.182752816 | 0.016 | 0.068 | 4.21E-17 | 1.1 |
| NCK2      | 1.83E-21 | -0.252639631 | 0.101 | 0.187 | 4.41E-17 | 1.1 |

|            |          |              |       |       |          |     |
|------------|----------|--------------|-------|-------|----------|-----|
| ZNF248     | 1.89E-21 | -0.185189004 | 0.014 | 0.063 | 4.55E-17 | 1.1 |
| ATXN7L1    | 2.06E-21 | -0.182244145 | 0.021 | 0.075 | 4.97E-17 | 1.1 |
| RP11-739G  | 2.09E-21 | -0.274450233 | 0.008 | 0.053 | 5.05E-17 | 1.1 |
| TTBK2      | 2.10E-21 | -0.209500651 | 0.063 | 0.138 | 5.06E-17 | 1.1 |
| IFIT2      | 2.16E-21 | 0.41107972   | 0.072 | 0.028 | 5.20E-17 | 1.1 |
| GON4L      | 2.23E-21 | -0.199719073 | 0.083 | 0.164 | 5.39E-17 | 1.1 |
| CEACAM1    | 2.25E-21 | -0.201503337 | 0.063 | 0.136 | 5.42E-17 | 1.1 |
| RALY       | 2.26E-21 | -0.177724377 | 0.092 | 0.178 | 5.44E-17 | 1.1 |
| SLF2       | 2.26E-21 | -0.146440253 | 0.007 | 0.05  | 5.46E-17 | 1.1 |
| TNPO3      | 2.28E-21 | -0.195176805 | 0.076 | 0.156 | 5.50E-17 | 1.1 |
| ENTPD1-AS  | 2.29E-21 | -0.197188353 | 0.028 | 0.086 | 5.51E-17 | 1.1 |
| HEATR5A    | 2.41E-21 | -0.147134422 | 0.021 | 0.076 | 5.80E-17 | 1.1 |
| CTD-3131K  | 2.51E-21 | -0.149183548 | 0.014 | 0.063 | 6.05E-17 | 1.1 |
| MYH14      | 2.54E-21 | -0.222569705 | 0.105 | 0.193 | 6.11E-17 | 1.1 |
| SPDYE1     | 2.58E-21 | -0.151568486 | 0.013 | 0.062 | 6.22E-17 | 1.1 |
| LBP        | 2.71E-21 | -0.23111965  | 0.004 | 0.045 | 6.53E-17 | 1.1 |
| SUCLG2     | 2.72E-21 | -0.231910817 | 0.048 | 0.116 | 6.56E-17 | 1.1 |
| LGALS1     | 2.79E-21 | -0.27461598  | 0.032 | 0.092 | 6.74E-17 | 1.1 |
| MGME1      | 2.93E-21 | -0.170889702 | 0.025 | 0.081 | 7.06E-17 | 1.1 |
| APPL2      | 3.03E-21 | -0.207988538 | 0.03  | 0.089 | 7.30E-17 | 1.1 |
| ASXL2      | 3.04E-21 | -0.186361505 | 0.033 | 0.093 | 7.33E-17 | 1.1 |
| AMY2B      | 3.08E-21 | -0.146664511 | 0.008 | 0.053 | 7.42E-17 | 1.1 |
| ADAM17     | 3.09E-21 | 0.42521546   | 0.469 | 0.404 | 7.45E-17 | 1.1 |
| RABEP1     | 3.10E-21 | -0.231675562 | 0.054 | 0.123 | 7.47E-17 | 1.1 |
| EFHD1      | 3.20E-21 | 0.208324159  | 0.087 | 0.038 | 7.72E-17 | 1.1 |
| ANKRD10    | 3.46E-21 | -0.16690119  | 0.394 | 0.546 | 8.33E-17 | 1.1 |
| KIAA1109   | 3.58E-21 | -0.215365654 | 0.066 | 0.141 | 8.62E-17 | 1.1 |
| RPS11      | 3.82E-21 | 0.374441661  | 0.78  | 0.769 | 9.22E-17 | 1.1 |
| RASD1      | 4.11E-21 | -0.141056905 | 0.003 | 0.042 | 9.90E-17 | 1.1 |
| MLLT3      | 4.14E-21 | -0.274785689 | 0.092 | 0.173 | 9.97E-17 | 1.1 |
| TM2D1      | 4.29E-21 | -0.191590152 | 0.045 | 0.112 | 1.04E-16 | 1.1 |
| ZDHHC2     | 4.36E-21 | -0.148453353 | 0.018 | 0.069 | 1.05E-16 | 1.1 |
| STK38L     | 4.39E-21 | 0.394271385  | 0.195 | 0.123 | 1.06E-16 | 1.1 |
| ALG14      | 4.46E-21 | -0.205644349 | 0.041 | 0.105 | 1.08E-16 | 1.1 |
| TAF3       | 4.48E-21 | -0.186995786 | 0.023 | 0.079 | 1.08E-16 | 1.1 |
| SNAP23     | 4.60E-21 | -0.201575271 | 0.088 | 0.17  | 1.11E-16 | 1.1 |
| APBB2      | 4.63E-21 | -0.253697802 | 0.055 | 0.125 | 1.12E-16 | 1.1 |
| TAGLN2     | 4.96E-21 | -0.292056133 | 0.12  | 0.21  | 1.20E-16 | 1.1 |
| BIRC3      | 5.01E-21 | -0.162999904 | 0.738 | 0.856 | 1.21E-16 | 1.1 |
| RBM23      | 5.04E-21 | -0.183971435 | 0.041 | 0.105 | 1.21E-16 | 1.1 |
| SULF2      | 5.27E-21 | -0.226680406 | 0.05  | 0.119 | 1.27E-16 | 1.1 |
| ATP9B      | 5.37E-21 | -0.202420665 | 0.035 | 0.095 | 1.29E-16 | 1.1 |
| FLOT1      | 5.46E-21 | -0.210417733 | 0.06  | 0.132 | 1.32E-16 | 1.1 |
| MLF1       | 5.53E-21 | 0.379319939  | 0.29  | 0.207 | 1.33E-16 | 1.1 |
| RP11-65112 | 5.54E-21 | -0.182431139 | 0.016 | 0.067 | 1.34E-16 | 1.1 |
| DTWD1      | 5.69E-21 | -0.176770132 | 0.028 | 0.085 | 1.37E-16 | 1.1 |
| GLS        | 5.73E-21 | -0.287193342 | 0.182 | 0.286 | 1.38E-16 | 1.1 |

|           |          |              |       |       |          |     |
|-----------|----------|--------------|-------|-------|----------|-----|
| LAP3      | 5.76E-21 | -0.266370318 | 0.115 | 0.201 | 1.39E-16 | 1.1 |
| WBP2NL    | 5.92E-21 | -0.17027338  | 0.016 | 0.066 | 1.43E-16 | 1.1 |
| WDSUB1    | 6.22E-21 | -0.18937767  | 0.02  | 0.072 | 1.50E-16 | 1.1 |
| ARHGAP32  | 6.23E-21 | -0.220904744 | 0.197 | 0.308 | 1.50E-16 | 1.1 |
| BBS4      | 6.32E-21 | -0.171265702 | 0.015 | 0.065 | 1.52E-16 | 1.1 |
| GTPBP10   | 6.36E-21 | -0.199087124 | 0.051 | 0.12  | 1.53E-16 | 1.1 |
| RPS13     | 6.70E-21 | 0.391058638  | 0.829 | 0.855 | 1.62E-16 | 1.1 |
| PICALM    | 6.72E-21 | -0.195131112 | 0.313 | 0.449 | 1.62E-16 | 1.1 |
| YBX3      | 6.78E-21 | -0.29724863  | 0.202 | 0.305 | 1.64E-16 | 1.1 |
| STRBP     | 7.33E-21 | -0.228880494 | 0.124 | 0.215 | 1.77E-16 | 1.1 |
| PRPF3     | 7.61E-21 | -0.232456562 | 0.066 | 0.14  | 1.84E-16 | 1.1 |
| TPBG      | 7.84E-21 | -0.161175722 | 0.02  | 0.072 | 1.89E-16 | 1.1 |
| TIMM10B.1 | 7.93E-21 | -0.142913487 | 0.01  | 0.056 | 1.91E-16 | 1.1 |
| ANAPC13   | 7.97E-21 | -0.19399832  | 0.07  | 0.146 | 1.92E-16 | 1.1 |
| KLF3      | 8.38E-21 | -0.212115825 | 0.062 | 0.135 | 2.02E-16 | 1.1 |
| LIPE-AS1  | 8.41E-21 | -0.233678273 | 0.038 | 0.1   | 2.03E-16 | 1.1 |
| MRFAP1L1  | 8.63E-21 | -0.150378001 | 0.013 | 0.06  | 2.08E-16 | 1.1 |
| LARS2     | 8.85E-21 | -0.146940073 | 0.011 | 0.058 | 2.13E-16 | 1.1 |
| CD164     | 9.20E-21 | -0.198424189 | 0.114 | 0.205 | 2.22E-16 | 1.1 |
| PTP4A2    | 9.23E-21 | 0.309686133  | 0.165 | 0.097 | 2.23E-16 | 1.1 |
| CASK      | 9.65E-21 | -0.187858027 | 0.206 | 0.32  | 2.33E-16 | 1.1 |
| WDR43     | 1.01E-20 | 0.337994984  | 0.159 | 0.093 | 2.43E-16 | 1.1 |
| PURB      | 1.01E-20 | -0.182698974 | 0.025 | 0.08  | 2.44E-16 | 1.1 |
| ZXDC      | 1.03E-20 | -0.190186226 | 0.043 | 0.108 | 2.48E-16 | 1.1 |
| EIF3J-AS1 | 1.03E-20 | -0.157938307 | 0.023 | 0.078 | 2.49E-16 | 1.1 |
| TAMM41    | 1.14E-20 | -0.155256056 | 0.01  | 0.055 | 2.75E-16 | 1.1 |
| RP11-350N | 1.16E-20 | 0.115766353  | 0.032 | 0.006 | 2.79E-16 | 1.1 |
| SLC30A9   | 1.20E-20 | -0.203142014 | 0.063 | 0.136 | 2.90E-16 | 1.1 |
| MAGI2     | 1.23E-20 | -0.279470275 | 0.047 | 0.114 | 2.97E-16 | 1.1 |
| PUDP      | 1.25E-20 | -0.140583895 | 0.007 | 0.049 | 3.01E-16 | 1.1 |
| MYH9      | 1.25E-20 | 0.296370864  | 0.547 | 0.467 | 3.01E-16 | 1.1 |
| EYA3      | 1.31E-20 | -0.219435143 | 0.049 | 0.116 | 3.15E-16 | 1.1 |
| FOXO3     | 1.32E-20 | -0.123840844 | 0.238 | 0.36  | 3.17E-16 | 1.1 |
| MT-ND2    | 1.33E-20 | -0.163742635 | 0.969 | 0.978 | 3.20E-16 | 1.1 |
| GK5       | 1.34E-20 | -0.18679798  | 0.027 | 0.083 | 3.24E-16 | 1.1 |
| AP001439. | 1.35E-20 | 0.321642537  | 0.136 | 0.075 | 3.26E-16 | 1.1 |
| CTCF      | 1.39E-20 | -0.184079505 | 0.032 | 0.09  | 3.34E-16 | 1.1 |
| STEAP1    | 1.40E-20 | -0.16264906  | 0.013 | 0.06  | 3.38E-16 | 1.1 |
| CD82      | 1.41E-20 | -0.199036162 | 0.03  | 0.088 | 3.41E-16 | 1.1 |
| CHD6      | 1.44E-20 | 0.418341596  | 0.35  | 0.276 | 3.47E-16 | 1.1 |
| ITSN2     | 1.49E-20 | -0.267151285 | 0.241 | 0.354 | 3.60E-16 | 1.1 |
| TRPC1     | 1.51E-20 | -0.160540478 | 0.013 | 0.06  | 3.65E-16 | 1.1 |
| HCFC2     | 1.59E-20 | 0.181573704  | 0.068 | 0.026 | 3.85E-16 | 1.1 |
| MROH1     | 1.61E-20 | -0.181556137 | 0.018 | 0.069 | 3.87E-16 | 1.1 |
| LYRM2     | 1.61E-20 | -0.181362793 | 0.058 | 0.129 | 3.87E-16 | 1.1 |
| DANT2     | 1.73E-20 | -0.215415454 | 0.039 | 0.101 | 4.17E-16 | 1.1 |
| RNF168    | 1.73E-20 | -0.165136608 | 0.035 | 0.095 | 4.17E-16 | 1.1 |

|           |          |              |       |       |          |     |
|-----------|----------|--------------|-------|-------|----------|-----|
| ZNF75A    | 1.74E-20 | -0.144545453 | 0.006 | 0.048 | 4.20E-16 | 1.1 |
| BCL11A    | 1.80E-20 | -0.17371469  | 0.022 | 0.075 | 4.33E-16 | 1.1 |
| LUC7L     | 1.84E-20 | -0.202550717 | 0.048 | 0.113 | 4.44E-16 | 1.1 |
| HNRNPU    | 1.89E-20 | 0.316496253  | 0.15  | 0.086 | 4.55E-16 | 1.1 |
| ESR2      | 1.97E-20 | -0.194322016 | 0.06  | 0.132 | 4.75E-16 | 1.1 |
| RASGEF1A  | 1.98E-20 | -0.160954889 | 0.008 | 0.051 | 4.78E-16 | 1.1 |
| GCNT1     | 2.02E-20 | 0.39456856   | 0.136 | 0.076 | 4.86E-16 | 1.1 |
| RP5-1101C | 2.02E-20 | -0.168099192 | 0.016 | 0.065 | 4.87E-16 | 1.1 |
| ATP11C    | 2.08E-20 | -0.132216834 | 0.03  | 0.089 | 5.01E-16 | 1.1 |
| GGA2      | 2.09E-20 | 0.350784812  | 0.202 | 0.131 | 5.04E-16 | 1.1 |
| RP11-277P | 2.18E-20 | -0.229734046 | 0.03  | 0.086 | 5.25E-16 | 1.1 |
| C11orf49  | 2.20E-20 | -0.24584896  | 0.084 | 0.163 | 5.31E-16 | 1.1 |
| TCF25     | 2.29E-20 | -0.253631909 | 0.06  | 0.131 | 5.53E-16 | 1.1 |
| EZH1      | 2.34E-20 | -0.187334612 | 0.049 | 0.116 | 5.63E-16 | 1.1 |
| MTX2      | 2.38E-20 | -0.18254062  | 0.028 | 0.085 | 5.74E-16 | 1.1 |
| UFC1      | 2.40E-20 | 0.343489423  | 0.544 | 0.498 | 5.78E-16 | 1.1 |
| SLC39A1   | 2.45E-20 | -0.203559981 | 0.039 | 0.1   | 5.91E-16 | 1.1 |
| LMBR1     | 2.54E-20 | -0.217637297 | 0.068 | 0.141 | 6.13E-16 | 1.1 |
| GNL2      | 2.56E-20 | 0.292972377  | 0.149 | 0.085 | 6.18E-16 | 1.1 |
| THUMPD1   | 2.80E-20 | -0.174323505 | 0.038 | 0.099 | 6.74E-16 | 1.1 |
| SAR1B     | 2.81E-20 | 0.533620007  | 0.496 | 0.441 | 6.78E-16 | 1.1 |
| MYO9B     | 3.09E-20 | 0.419512254  | 0.258 | 0.182 | 7.46E-16 | 1.1 |
| ZC3H13    | 3.30E-20 | -0.21153603  | 0.116 | 0.205 | 7.96E-16 | 1.1 |
| ZFAND1    | 3.34E-20 | 0.358443208  | 0.334 | 0.258 | 8.06E-16 | 1.1 |
| DAPK3     | 3.37E-20 | 0.213701634  | 0.091 | 0.042 | 8.12E-16 | 1.1 |
| PPCDC     | 3.59E-20 | -0.166198291 | 0.013 | 0.059 | 8.65E-16 | 1.1 |
| RP5-894A1 | 3.79E-20 | -0.132192946 | 0.003 | 0.04  | 9.14E-16 | 1.1 |
| RAB13     | 3.84E-20 | -0.227595379 | 0.086 | 0.164 | 9.25E-16 | 1.1 |
| SOCS5     | 4.20E-20 | -0.239153998 | 0.105 | 0.19  | 1.01E-15 | 1.1 |
| CD83      | 4.24E-20 | 0.39433925   | 0.146 | 0.083 | 1.02E-15 | 1.1 |
| DDX46     | 4.40E-20 | -0.221156401 | 0.054 | 0.121 | 1.06E-15 | 1.1 |
| CDC42SE2  | 4.43E-20 | -0.192882877 | 0.152 | 0.251 | 1.07E-15 | 1.1 |
| CSF3R     | 4.46E-20 | -0.152305208 | 0.005 | 0.046 | 1.08E-15 | 1.1 |
| VPS54     | 4.51E-20 | -0.205466051 | 0.158 | 0.258 | 1.09E-15 | 1.1 |
| CHCHD7    | 4.61E-20 | -0.167386272 | 0.031 | 0.089 | 1.11E-15 | 1.1 |
| DYM       | 4.73E-20 | -0.205580587 | 0.169 | 0.274 | 1.14E-15 | 1.1 |
| ZCCHC8    | 4.82E-20 | 0.337125006  | 0.183 | 0.114 | 1.16E-15 | 1.1 |
| PTTG1IP   | 4.83E-20 | -0.202953256 | 0.082 | 0.161 | 1.16E-15 | 1.1 |
| ATL3      | 4.84E-20 | -0.176302881 | 0.064 | 0.137 | 1.17E-15 | 1.1 |
| DYNLT3    | 5.23E-20 | -0.229578373 | 0.147 | 0.243 | 1.26E-15 | 1.1 |
| SH2D3A    | 5.27E-20 | -0.176051809 | 0.018 | 0.067 | 1.27E-15 | 1.1 |
| AHI1      | 5.44E-20 | -0.240805399 | 0.138 | 0.232 | 1.31E-15 | 1.1 |
| ACTB      | 5.49E-20 | 0.352659787  | 0.658 | 0.601 | 1.32E-15 | 1.1 |
| CXCL6     | 5.71E-20 | -0.206712898 | 0.007 | 0.049 | 1.38E-15 | 1.1 |
| YIPF4     | 5.95E-20 | -0.188582444 | 0.048 | 0.113 | 1.43E-15 | 1.1 |
| PAPD4     | 6.11E-20 | -0.212971075 | 0.214 | 0.322 | 1.47E-15 | 1.1 |
| NUDCD3    | 6.25E-20 | -0.210575262 | 0.057 | 0.125 | 1.51E-15 | 1.1 |



|            |          |              |       |       |          |     |
|------------|----------|--------------|-------|-------|----------|-----|
| ZFYVE16    | 6.27E-20 | -0.175191907 | 0.039 | 0.101 | 1.51E-15 | 1.1 |
| TRA2B      | 6.37E-20 | 0.422716218  | 0.252 | 0.179 | 1.54E-15 | 1.1 |
| ACSS2      | 6.39E-20 | -0.221049439 | 0.115 | 0.202 | 1.54E-15 | 1.1 |
| DNHD1      | 6.48E-20 | -0.171235794 | 0.03  | 0.086 | 1.56E-15 | 1.1 |
| TUSC3      | 6.92E-20 | -0.230172467 | 0.089 | 0.167 | 1.67E-15 | 1.1 |
| MOCOS      | 7.15E-20 | -0.167120291 | 0.015 | 0.063 | 1.72E-15 | 1.1 |
| N4BP2L1    | 7.18E-20 | -0.202376551 | 0.057 | 0.126 | 1.73E-15 | 1.1 |
| WWTR1      | 7.81E-20 | 0.440751724  | 0.453 | 0.392 | 1.88E-15 | 1.1 |
| RUFY1      | 7.90E-20 | -0.204029772 | 0.035 | 0.093 | 1.90E-15 | 1.1 |
| NEDD1      | 8.20E-20 | -0.172605855 | 0.032 | 0.089 | 1.98E-15 | 1.1 |
| HP         | 8.22E-20 | -0.484836994 | 0.002 | 0.038 | 1.98E-15 | 1.1 |
| C1orf198   | 8.70E-20 | 0.237307971  | 0.103 | 0.051 | 2.10E-15 | 1.1 |
| TNKS       | 9.35E-20 | -0.188541571 | 0.193 | 0.301 | 2.25E-15 | 1.1 |
| SPOP       | 9.38E-20 | -0.151897448 | 0.043 | 0.107 | 2.26E-15 | 1.1 |
| C1orf132   | 9.96E-20 | -0.218082279 | 0.028 | 0.082 | 2.40E-15 | 1.1 |
| TGIF1      | 1.00E-19 | -0.161530845 | 0.077 | 0.153 | 2.41E-15 | 1.1 |
| ZNF765     | 1.06E-19 | -0.142294847 | 0.006 | 0.047 | 2.55E-15 | 1.1 |
| TLR1       | 1.14E-19 | -0.175267691 | 0.021 | 0.072 | 2.75E-15 | 1.1 |
| PIGL       | 1.17E-19 | -0.200338244 | 0.033 | 0.09  | 2.81E-15 | 1.1 |
| EBF4       | 1.17E-19 | -0.154307329 | 0.009 | 0.051 | 2.82E-15 | 1.1 |
| SEMA3B     | 1.19E-19 | 0.161718068  | 0.045 | 0.013 | 2.86E-15 | 1.1 |
| C1orf147   | 1.20E-19 | -0.143994478 | 0.005 | 0.043 | 2.90E-15 | 1.1 |
| DDR1       | 1.23E-19 | -0.196457076 | 0.083 | 0.16  | 2.96E-15 | 1.1 |
| ITSN1      | 1.26E-19 | -0.256653868 | 0.077 | 0.151 | 3.03E-15 | 1.1 |
| PRIM2      | 1.31E-19 | -0.177193977 | 0.035 | 0.093 | 3.16E-15 | 1.1 |
| ERCC3      | 1.36E-19 | -0.151027826 | 0.008 | 0.049 | 3.28E-15 | 1.1 |
| RBP5       | 1.44E-19 | -0.132873125 | 0.011 | 0.055 | 3.47E-15 | 1.1 |
| RP11-1410  | 1.47E-19 | -0.164859234 | 0.007 | 0.047 | 3.54E-15 | 1.1 |
| HDAC1      | 1.49E-19 | -0.19654425  | 0.061 | 0.131 | 3.59E-15 | 1.1 |
| ZNHIT6     | 1.54E-19 | -0.228540731 | 0.125 | 0.212 | 3.72E-15 | 1.1 |
| MTMR3      | 1.57E-19 | 0.362218325  | 0.22  | 0.147 | 3.78E-15 | 1.1 |
| SLC22A23   | 1.60E-19 | -0.192197299 | 0.104 | 0.188 | 3.86E-15 | 1.1 |
| RP11-47311 | 1.66E-19 | 0.190526511  | 0.081 | 0.036 | 4.01E-15 | 1.1 |
| NCALD      | 1.75E-19 | 0.54288781   | 0.269 | 0.198 | 4.22E-15 | 1.1 |
| PPM1A      | 1.76E-19 | -0.195503204 | 0.075 | 0.149 | 4.25E-15 | 1.1 |
| TLK1       | 1.84E-19 | -0.227568397 | 0.139 | 0.232 | 4.45E-15 | 1.1 |
| RSPH3      | 1.85E-19 | -0.18847978  | 0.027 | 0.08  | 4.45E-15 | 1.1 |
| FABP3      | 1.88E-19 | 0.367249742  | 0.035 | 0.009 | 4.54E-15 | 1.1 |
| PIBF1      | 2.01E-19 | -0.269546489 | 0.145 | 0.236 | 4.86E-15 | 1.1 |
| TRIP4      | 2.02E-19 | -0.149666748 | 0.014 | 0.06  | 4.86E-15 | 1.1 |
| SMARCD3    | 2.03E-19 | -0.161519405 | 0.007 | 0.047 | 4.89E-15 | 1.1 |
| MED13      | 2.05E-19 | 0.402917391  | 0.4   | 0.331 | 4.93E-15 | 1.1 |
| C15orf41   | 2.16E-19 | -0.188066161 | 0.032 | 0.088 | 5.21E-15 | 1.1 |
| MAGI3      | 2.23E-19 | -0.186049651 | 0.12  | 0.209 | 5.38E-15 | 1.1 |
| EXOSC8     | 2.24E-19 | 0.325766056  | 0.201 | 0.13  | 5.39E-15 | 1.1 |
| HNRNPF     | 2.24E-19 | -0.197762962 | 0.078 | 0.153 | 5.41E-15 | 1.1 |
| RAP1GDS1   | 2.46E-19 | -0.191234    | 0.041 | 0.101 | 5.94E-15 | 1.1 |

|           |          |              |       |       |          |     |
|-----------|----------|--------------|-------|-------|----------|-----|
| ZNF44     | 2.49E-19 | -0.148476706 | 0.018 | 0.067 | 6.00E-15 | 1.1 |
| CHFR      | 2.51E-19 | -0.16741742  | 0.029 | 0.084 | 6.05E-15 | 1.1 |
| GDE1      | 2.55E-19 | -0.152646024 | 0.029 | 0.084 | 6.16E-15 | 1.1 |
| PEA15     | 2.60E-19 | -0.199808756 | 0.129 | 0.218 | 6.28E-15 | 1.1 |
| MLH3      | 2.69E-19 | -0.189521466 | 0.053 | 0.118 | 6.48E-15 | 1.1 |
| PMM2      | 2.97E-19 | -0.189957866 | 0.046 | 0.11  | 7.15E-15 | 1.1 |
| PPID      | 3.21E-19 | -0.158495636 | 0.035 | 0.093 | 7.74E-15 | 1.1 |
| PAK2      | 3.21E-19 | -0.171358062 | 0.112 | 0.199 | 7.75E-15 | 1.1 |
| DDX60L    | 3.49E-19 | -0.144054243 | 0.014 | 0.06  | 8.41E-15 | 1.1 |
| DNER      | 3.56E-19 | -0.265838303 | 0.032 | 0.087 | 8.59E-15 | 1.1 |
| TFB1M     | 3.67E-19 | -0.154110772 | 0.024 | 0.076 | 8.85E-15 | 1.1 |
| CHD8      | 3.75E-19 | -0.196062684 | 0.047 | 0.109 | 9.04E-15 | 1.1 |
| SDF2      | 3.80E-19 | -0.163218794 | 0.05  | 0.114 | 9.15E-15 | 1.1 |
| MB21D2    | 3.80E-19 | 0.286571903  | 0.113 | 0.059 | 9.17E-15 | 1.1 |
| MIR646HG  | 3.97E-19 | -0.227110649 | 0.049 | 0.113 | 9.58E-15 | 1.1 |
| CTNND1    | 3.98E-19 | 0.362695049  | 0.372 | 0.3   | 9.60E-15 | 1.1 |
| RP11-106N | 4.07E-19 | -0.171869877 | 0.011 | 0.055 | 9.82E-15 | 1.1 |
| KBTBD3    | 4.19E-19 | -0.132278464 | 0.01  | 0.053 | 1.01E-14 | 1.1 |
| ZNF302    | 4.26E-19 | -0.122635191 | 0.005 | 0.042 | 1.03E-14 | 1.1 |
| WASF1     | 4.26E-19 | -0.151728107 | 0.02  | 0.07  | 1.03E-14 | 1.1 |
| DCUN1D1   | 4.53E-19 | -0.181795794 | 0.087 | 0.165 | 1.09E-14 | 1.1 |
| 9-Sep     | 4.68E-19 | -0.176426806 | 0.072 | 0.146 | 1.13E-14 | 1.1 |
| EML4      | 4.74E-19 | 0.371522221  | 0.321 | 0.244 | 1.14E-14 | 1.1 |
| CUL4A     | 4.78E-19 | -0.193925002 | 0.083 | 0.159 | 1.15E-14 | 1.1 |
| ZNF611    | 4.89E-19 | -0.138518081 | 0.019 | 0.067 | 1.18E-14 | 1.1 |
| CREB1     | 4.92E-19 | -0.18282535  | 0.119 | 0.206 | 1.19E-14 | 1.1 |
| TNC       | 5.02E-19 | -0.444857158 | 0.065 | 0.132 | 1.21E-14 | 1.1 |
| TRPM7     | 5.02E-19 | -0.213837029 | 0.124 | 0.211 | 1.21E-14 | 1.1 |
| SETD5     | 5.09E-19 | 0.400871594  | 0.546 | 0.509 | 1.23E-14 | 1.1 |
| TRMT11    | 5.30E-19 | -0.174640637 | 0.081 | 0.158 | 1.28E-14 | 1.1 |
| RCOR3     | 5.39E-19 | -0.222038424 | 0.05  | 0.113 | 1.30E-14 | 1.1 |
| SNX3      | 5.81E-19 | -0.178012377 | 0.126 | 0.214 | 1.40E-14 | 1.1 |
| KIAA0196  | 5.85E-19 | -0.145763763 | 0.017 | 0.064 | 1.41E-14 | 1.1 |
| ITGB8     | 5.85E-19 | -0.236420277 | 0.654 | 0.766 | 1.41E-14 | 1.1 |
| WSB1      | 5.99E-19 | 0.523921374  | 0.385 | 0.32  | 1.44E-14 | 1.1 |
| PRLR      | 6.18E-19 | -0.215238677 | 0.078 | 0.152 | 1.49E-14 | 1.1 |
| GDAP2     | 6.45E-19 | -0.142278383 | 0.011 | 0.054 | 1.56E-14 | 1.1 |
| RALGAPB   | 6.48E-19 | -0.219323272 | 0.074 | 0.145 | 1.56E-14 | 1.1 |
| PON2      | 6.72E-19 | -0.157090778 | 0.021 | 0.071 | 1.62E-14 | 1.1 |
| ERC2      | 6.76E-19 | -0.207547172 | 0.046 | 0.108 | 1.63E-14 | 1.1 |
| NSUN3     | 7.13E-19 | -0.168453057 | 0.017 | 0.063 | 1.72E-14 | 1.1 |
| RP11-475O | 7.24E-19 | -0.191786111 | 0.018 | 0.065 | 1.75E-14 | 1.1 |
| BZW1      | 7.29E-19 | -0.197479502 | 0.096 | 0.174 | 1.76E-14 | 1.1 |
| PIWIL4    | 7.37E-19 | -0.174718931 | 0.025 | 0.076 | 1.78E-14 | 1.1 |
| GRIK1     | 7.45E-19 | -0.17588298  | 0.019 | 0.067 | 1.80E-14 | 1.1 |
| FAM179B   | 7.71E-19 | -0.189042822 | 0.037 | 0.094 | 1.86E-14 | 1.1 |
| ZNF100    | 7.74E-19 | -0.142774523 | 0.01  | 0.052 | 1.87E-14 | 1.1 |

|            |          |              |       |       |          |     |
|------------|----------|--------------|-------|-------|----------|-----|
| DRAM1      | 7.85E-19 | -0.211169241 | 0.108 | 0.191 | 1.89E-14 | 1.1 |
| AP4E1      | 8.00E-19 | -0.136081457 | 0.014 | 0.059 | 1.93E-14 | 1.1 |
| GULP1      | 8.13E-19 | -0.207665745 | 0.125 | 0.213 | 1.96E-14 | 1.1 |
| ACTR2      | 8.18E-19 | -0.17408098  | 0.147 | 0.241 | 1.97E-14 | 1.1 |
| AC058791.  | 8.31E-19 | -0.209796598 | 0.142 | 0.233 | 2.00E-14 | 1.1 |
| UBL5       | 8.44E-19 | -0.185977535 | 0.289 | 0.411 | 2.03E-14 | 1.1 |
| MFSD14B    | 8.67E-19 | -0.173959853 | 0.052 | 0.116 | 2.09E-14 | 1.1 |
| KLK5       | 8.75E-19 | 0.325641918  | 0.108 | 0.056 | 2.11E-14 | 1.1 |
| RPL23      | 8.88E-19 | 0.14952844   | 0.968 | 0.961 | 2.14E-14 | 1.1 |
| CREB5      | 8.89E-19 | 0.402983005  | 0.377 | 0.297 | 2.14E-14 | 1.1 |
| PLIN3      | 9.03E-19 | -0.169188937 | 0.06  | 0.128 | 2.18E-14 | 1.1 |
| SUGT1      | 9.04E-19 | -0.177280168 | 0.095 | 0.174 | 2.18E-14 | 1.1 |
| ZC3H6      | 9.09E-19 | -0.175018667 | 0.03  | 0.084 | 2.19E-14 | 1.1 |
| DNAJC5     | 9.17E-19 | -0.189336448 | 0.041 | 0.1   | 2.21E-14 | 1.1 |
| FAM3B      | 9.28E-19 | -0.184001781 | 0.034 | 0.089 | 2.24E-14 | 1.1 |
| ROCK1      | 9.65E-19 | -0.20387843  | 0.14  | 0.231 | 2.33E-14 | 1.1 |
| PIGA       | 9.78E-19 | 0.272587617  | 0.125 | 0.069 | 2.36E-14 | 1.1 |
| MIB1       | 9.79E-19 | -0.179919851 | 0.22  | 0.334 | 2.36E-14 | 1.1 |
| RFWD3      | 1.09E-18 | -0.163389933 | 0.015 | 0.061 | 2.63E-14 | 1.1 |
| NRF1       | 1.11E-18 | -0.203970161 | 0.073 | 0.145 | 2.68E-14 | 1.1 |
| SPG7       | 1.13E-18 | -0.183613111 | 0.021 | 0.071 | 2.72E-14 | 1.1 |
| IL34       | 1.20E-18 | -0.186680105 | 0.103 | 0.186 | 2.89E-14 | 1.1 |
| C11orf1    | 1.22E-18 | 0.340628025  | 0.231 | 0.161 | 2.94E-14 | 1.1 |
| RP11-418J1 | 1.23E-18 | -0.160263128 | 0.012 | 0.054 | 2.96E-14 | 1.1 |
| ZSWIM4     | 1.24E-18 | -0.136371951 | 0.131 | 0.22  | 2.99E-14 | 1.1 |
| SMARCAD1   | 1.25E-18 | -0.172715634 | 0.029 | 0.083 | 3.02E-14 | 1.1 |
| FRY        | 1.29E-18 | -0.167714966 | 0.01  | 0.051 | 3.12E-14 | 1.1 |
| NBPF12     | 1.31E-18 | -0.136632147 | 0.026 | 0.078 | 3.15E-14 | 1.1 |
| RNF149     | 1.32E-18 | 0.395189853  | 0.351 | 0.279 | 3.19E-14 | 1.1 |
| PRKX       | 1.39E-18 | -0.180300967 | 0.114 | 0.198 | 3.36E-14 | 1.1 |
| PERP       | 1.40E-18 | -0.209856575 | 0.246 | 0.358 | 3.38E-14 | 1.1 |
| KIF9-AS1   | 1.41E-18 | -0.150350258 | 0.015 | 0.06  | 3.39E-14 | 1.1 |
| SRSF4      | 1.44E-18 | -0.219435554 | 0.21  | 0.313 | 3.48E-14 | 1.1 |
| DNAJC7     | 1.47E-18 | -0.19524057  | 0.145 | 0.236 | 3.55E-14 | 1.1 |
| TMEM164    | 1.49E-18 | -0.140760263 | 0.013 | 0.056 | 3.58E-14 | 1.1 |
| C15orf52   | 1.56E-18 | -0.144571294 | 0.014 | 0.058 | 3.77E-14 | 1.1 |
| ZNF226     | 1.56E-18 | -0.170593547 | 0.037 | 0.093 | 3.77E-14 | 1.1 |
| STAT1      | 1.64E-18 | -0.161734847 | 0.035 | 0.091 | 3.95E-14 | 1.1 |
| HS2ST1     | 1.64E-18 | -0.154298648 | 0.008 | 0.047 | 3.96E-14 | 1.1 |
| ACTR6      | 1.76E-18 | -0.161740465 | 0.111 | 0.195 | 4.23E-14 | 1.1 |
| BPNT1      | 1.78E-18 | -0.150017925 | 0.023 | 0.073 | 4.30E-14 | 1.1 |
| DHRS7      | 1.90E-18 | -0.142882409 | 0.021 | 0.069 | 4.59E-14 | 1.1 |
| PKM        | 2.03E-18 | -0.275578752 | 0.185 | 0.28  | 4.90E-14 | 1.1 |
| CTD-2337A  | 2.05E-18 | -0.23260363  | 0.126 | 0.214 | 4.94E-14 | 1.1 |
| RP11-793A  | 2.17E-18 | -0.182108244 | 0.011 | 0.053 | 5.23E-14 | 1.1 |
| GOLGB1     | 2.20E-18 | -0.198934745 | 0.291 | 0.409 | 5.30E-14 | 1.1 |
| RAB30-AS1  | 2.23E-18 | -0.156237456 | 0.052 | 0.116 | 5.37E-14 | 1.1 |

|           |          |              |       |       |          |     |
|-----------|----------|--------------|-------|-------|----------|-----|
| ODAM      | 2.30E-18 | -0.267112873 | 0.001 | 0.034 | 5.53E-14 | 1.1 |
| PILRB     | 2.34E-18 | -0.184466383 | 0.02  | 0.068 | 5.65E-14 | 1.1 |
| RPL39     | 2.37E-18 | 0.195833938  | 0.963 | 0.936 | 5.72E-14 | 1.1 |
| PLGRKT    | 2.42E-18 | -0.147330655 | 0.014 | 0.057 | 5.84E-14 | 1.1 |
| CRLF3     | 2.46E-18 | -0.178644333 | 0.073 | 0.145 | 5.94E-14 | 1.1 |
| UBA6-AS1  | 2.48E-18 | -0.22588051  | 0.045 | 0.105 | 5.98E-14 | 1.1 |
| ESR1      | 2.59E-18 | -0.263084681 | 0.083 | 0.155 | 6.25E-14 | 1.1 |
| DICER1    | 2.79E-18 | -0.200034739 | 0.108 | 0.189 | 6.74E-14 | 1.1 |
| CTD-2561J | 2.80E-18 | -0.137212888 | 0.012 | 0.054 | 6.75E-14 | 1.1 |
| RP11-774D | 2.89E-18 | -0.139015594 | 0.024 | 0.074 | 6.96E-14 | 1.1 |
| MTERF1    | 3.03E-18 | -0.151776363 | 0.037 | 0.094 | 7.31E-14 | 1.1 |
| FAM168A   | 3.09E-18 | 0.380619572  | 0.277 | 0.205 | 7.46E-14 | 1.1 |
| BOD1L1    | 3.19E-18 | -0.183243149 | 0.058 | 0.123 | 7.69E-14 | 1.1 |
| NBAT1     | 3.20E-18 | -0.182377422 | 0.039 | 0.097 | 7.72E-14 | 1.1 |
| EPB41L4A  | 3.37E-18 | -0.154248477 | 0.012 | 0.053 | 8.13E-14 | 1.1 |
| CBX3      | 3.45E-18 | -0.210360914 | 0.165 | 0.26  | 8.32E-14 | 1.1 |
| RECQL     | 3.73E-18 | -0.142020316 | 0.029 | 0.081 | 9.00E-14 | 1.1 |
| ITPKB     | 3.79E-18 | -0.161964476 | 0.025 | 0.076 | 9.15E-14 | 1.1 |
| UGP2      | 3.81E-18 | -0.153112579 | 0.421 | 0.562 | 9.18E-14 | 1.1 |
| FAM102A   | 3.85E-18 | -0.159391135 | 0.034 | 0.089 | 9.27E-14 | 1.1 |
| CHD7      | 4.24E-18 | -0.182310056 | 0.078 | 0.15  | 1.02E-13 | 1.1 |
| ARHGEF38  | 4.27E-18 | 0.400210744  | 0.525 | 0.469 | 1.03E-13 | 1.1 |
| SLC33A1   | 4.32E-18 | -0.17230319  | 0.036 | 0.092 | 1.04E-13 | 1.1 |
| KIAA1147  | 4.41E-18 | -0.202563889 | 0.043 | 0.101 | 1.06E-13 | 1.1 |
| RP11-544A | 4.41E-18 | -0.138328756 | 0.01  | 0.051 | 1.06E-13 | 1.1 |
| FBXO38    | 4.42E-18 | -0.138586733 | 0.02  | 0.068 | 1.07E-13 | 1.1 |
| TECPR2    | 4.49E-18 | -0.154875107 | 0.013 | 0.056 | 1.08E-13 | 1.1 |
| GJA1      | 4.51E-18 | 0.296012243  | 0.093 | 0.046 | 1.09E-13 | 1.1 |
| SF3B3     | 4.54E-18 | -0.176486774 | 0.146 | 0.236 | 1.09E-13 | 1.1 |
| SMAD5     | 4.54E-18 | -0.161259667 | 0.044 | 0.104 | 1.09E-13 | 1.1 |
| SPDYE5    | 4.62E-18 | -0.169719332 | 0.038 | 0.095 | 1.11E-13 | 1.1 |
| SLC7A11   | 4.68E-18 | -0.207489146 | 0.016 | 0.061 | 1.13E-13 | 1.1 |
| PWWP2A    | 4.69E-18 | -0.175562853 | 0.031 | 0.084 | 1.13E-13 | 1.1 |
| QDPR      | 4.73E-18 | -0.164760895 | 0.026 | 0.076 | 1.14E-13 | 1.1 |
| HDAC4     | 4.78E-18 | -0.177317525 | 0.012 | 0.053 | 1.15E-13 | 1.1 |
| AQR       | 4.85E-18 | -0.182718769 | 0.041 | 0.099 | 1.17E-13 | 1.1 |
| ACLY      | 4.89E-18 | -0.113076962 | 0.061 | 0.127 | 1.18E-13 | 1.1 |
| APOL1     | 4.94E-18 | -0.131375519 | 0.006 | 0.044 | 1.19E-13 | 1.1 |
| RP3-325F2 | 4.99E-18 | -0.132172407 | 0.007 | 0.044 | 1.20E-13 | 1.1 |
| LINC01122 | 5.08E-18 | -0.215523086 | 0.028 | 0.08  | 1.23E-13 | 1.1 |
| RAD50     | 5.33E-18 | -0.196797015 | 0.054 | 0.117 | 1.28E-13 | 1.1 |
| TIMP1     | 5.39E-18 | -0.231414389 | 0.023 | 0.072 | 1.30E-13 | 1.1 |
| TMEM99    | 5.45E-18 | 0.244166386  | 0.118 | 0.065 | 1.31E-13 | 1.1 |
| RNF144B   | 5.46E-18 | -0.276170964 | 0.272 | 0.378 | 1.32E-13 | 1.1 |
| NDUFS4    | 5.54E-18 | 0.353583526  | 0.494 | 0.451 | 1.34E-13 | 1.1 |
| ABHD18    | 5.54E-18 | -0.169214359 | 0.165 | 0.263 | 1.34E-13 | 1.1 |
| CYYR1     | 5.64E-18 | -0.192167872 | 0.037 | 0.092 | 1.36E-13 | 1.1 |

|           |          |              |       |       |          |     |
|-----------|----------|--------------|-------|-------|----------|-----|
| TPTEP1    | 5.66E-18 | -0.202744864 | 0.163 | 0.257 | 1.37E-13 | 1.1 |
| GLMN      | 6.29E-18 | -0.166619677 | 0.021 | 0.068 | 1.52E-13 | 1.1 |
| ABCC4     | 6.51E-18 | -0.192502337 | 0.008 | 0.046 | 1.57E-13 | 1.1 |
| ATP13A3   | 6.67E-18 | 0.466643576  | 0.387 | 0.327 | 1.61E-13 | 1.1 |
| TMSB10    | 6.70E-18 | -0.335194243 | 0.56  | 0.651 | 1.61E-13 | 1.1 |
| ZNF562    | 6.76E-18 | -0.20883328  | 0.169 | 0.262 | 1.63E-13 | 1.1 |
| PIGR      | 6.99E-18 | 0.579617824  | 0.559 | 0.504 | 1.68E-13 | 1.1 |
| KRCC1     | 7.07E-18 | -0.160867596 | 0.037 | 0.093 | 1.70E-13 | 1.1 |
| FAM107B   | 7.08E-18 | -0.246692849 | 0.176 | 0.269 | 1.71E-13 | 1.1 |
| C1GALT1C1 | 7.13E-18 | -0.136107054 | 0.015 | 0.059 | 1.72E-13 | 1.1 |
| KIAA1328  | 7.16E-18 | -0.179336499 | 0.045 | 0.104 | 1.73E-13 | 1.1 |
| LARP1     | 7.35E-18 | -0.183884689 | 0.118 | 0.201 | 1.77E-13 | 1.1 |
| PEX2      | 7.36E-18 | -0.16890318  | 0.051 | 0.112 | 1.77E-13 | 1.1 |
| CYP1B1-AS | 7.45E-18 | -0.140265114 | 0.01  | 0.049 | 1.80E-13 | 1.1 |
| RP11-266O | 7.71E-18 | -0.278189452 | 0.018 | 0.062 | 1.86E-13 | 1.1 |
| SMAD2     | 7.79E-18 | -0.202523797 | 0.168 | 0.263 | 1.88E-13 | 1.1 |
| CTPS2     | 7.92E-18 | -0.162981487 | 0.03  | 0.082 | 1.91E-13 | 1.1 |
| SEC61G    | 7.97E-18 | -0.258962762 | 0.623 | 0.73  | 1.92E-13 | 1.1 |
| ZNF430    | 8.02E-18 | -0.159975869 | 0.03  | 0.081 | 1.93E-13 | 1.1 |
| PRKAR2A   | 8.10E-18 | -0.150902359 | 0.072 | 0.143 | 1.95E-13 | 1.1 |
| SOX5      | 8.37E-18 | -0.189660749 | 0.011 | 0.051 | 2.02E-13 | 1.1 |
| GABRG3    | 8.77E-18 | -0.16105229  | 0.01  | 0.05  | 2.12E-13 | 1.1 |
| RNASEH2B  | 9.30E-18 | -0.12552006  | 0.011 | 0.052 | 2.24E-13 | 1.1 |
| NF2       | 9.93E-18 | 0.243334395  | 0.104 | 0.054 | 2.39E-13 | 1.1 |
| NHS       | 1.01E-17 | -0.235703763 | 0.129 | 0.212 | 2.44E-13 | 1.1 |
| PIK3C2G   | 1.02E-17 | 0.279987249  | 0.15  | 0.089 | 2.46E-13 | 1.1 |
| NUDT5     | 1.05E-17 | -0.190543531 | 0.123 | 0.205 | 2.54E-13 | 1.1 |
| RFX7      | 1.09E-17 | -0.214000103 | 0.094 | 0.169 | 2.63E-13 | 1.1 |
| SHROOM4   | 1.12E-17 | -0.127311979 | 0.005 | 0.041 | 2.71E-13 | 1.1 |
| HIST2H2BE | 1.13E-17 | -0.203438031 | 0.05  | 0.11  | 2.72E-13 | 1.1 |
| BTF3L4    | 1.13E-17 | -0.195997543 | 0.211 | 0.312 | 2.73E-13 | 1.1 |
| TRAF1     | 1.13E-17 | -0.207098889 | 0.029 | 0.08  | 2.73E-13 | 1.1 |
| C16orf62  | 1.16E-17 | -0.163859987 | 0.024 | 0.072 | 2.81E-13 | 1.1 |
| FBXO9     | 1.20E-17 | -0.175948736 | 0.033 | 0.085 | 2.90E-13 | 1.1 |
| SH3RF1    | 1.20E-17 | 0.402694571  | 0.295 | 0.222 | 2.90E-13 | 1.1 |
| FBXO22    | 1.20E-17 | -0.150523473 | 0.018 | 0.063 | 2.90E-13 | 1.1 |
| TRA2A     | 1.23E-17 | 0.357385587  | 0.455 | 0.397 | 2.95E-13 | 1.1 |
| CYB5R3    | 1.25E-17 | -0.181224964 | 0.036 | 0.091 | 3.01E-13 | 1.1 |
| HS3ST3B1  | 1.26E-17 | -0.127913297 | 0.003 | 0.035 | 3.04E-13 | 1.1 |
| EEF2      | 1.37E-17 | -0.368954295 | 0.368 | 0.474 | 3.30E-13 | 1.1 |
| TIAM2     | 1.40E-17 | -0.146972499 | 0.172 | 0.27  | 3.38E-13 | 1.1 |
| RP11-142N | 1.44E-17 | -0.135145761 | 0.003 | 0.035 | 3.46E-13 | 1.1 |
| UTRN      | 1.49E-17 | -0.287081057 | 0.151 | 0.239 | 3.59E-13 | 1.1 |
| CYP2U1    | 1.50E-17 | 0.127651713  | 0.051 | 0.018 | 3.61E-13 | 1.1 |
| TAF8      | 1.52E-17 | -0.135527956 | 0.018 | 0.063 | 3.66E-13 | 1.1 |
| PBX3      | 1.54E-17 | -0.165826628 | 0.016 | 0.059 | 3.71E-13 | 1.1 |
| SCGB1D2   | 1.58E-17 | 1.052359251  | 0.136 | 0.079 | 3.82E-13 | 1.1 |

|            |          |              |       |       |          |     |
|------------|----------|--------------|-------|-------|----------|-----|
| CDYL       | 1.60E-17 | -0.158611098 | 0.158 | 0.252 | 3.85E-13 | 1.1 |
| SRGAP2B    | 1.63E-17 | -0.135414414 | 0.008 | 0.046 | 3.93E-13 | 1.1 |
| MTRNR2L8   | 1.65E-17 | 0.329621867  | 0.254 | 0.183 | 3.99E-13 | 1.1 |
| SLTM       | 1.72E-17 | -0.225683351 | 0.19  | 0.285 | 4.15E-13 | 1.1 |
| SMIM12     | 1.73E-17 | -0.138929238 | 0.01  | 0.049 | 4.18E-13 | 1.1 |
| RP11-514P  | 1.77E-17 | -0.137020629 | 0.01  | 0.049 | 4.26E-13 | 1.1 |
| SLC38A6    | 1.77E-17 | -0.124202518 | 0.01  | 0.049 | 4.27E-13 | 1.1 |
| GLTSCR1L   | 1.78E-17 | -0.187117681 | 0.088 | 0.161 | 4.29E-13 | 1.1 |
| PDCD5      | 1.78E-17 | -0.140228642 | 0.012 | 0.052 | 4.30E-13 | 1.1 |
| TCTN3      | 1.78E-17 | -0.133025403 | 0.01  | 0.048 | 4.30E-13 | 1.1 |
| MKLN1      | 1.80E-17 | -0.2321764   | 0.546 | 0.665 | 4.33E-13 | 1.1 |
| SLC39A11   | 1.85E-17 | -0.153154591 | 0.036 | 0.091 | 4.46E-13 | 1.1 |
| LINC00853  | 1.87E-17 | -0.111763742 | 0.005 | 0.041 | 4.51E-13 | 1.1 |
| CTNNAL1    | 1.92E-17 | 0.334793783  | 0.15  | 0.092 | 4.64E-13 | 1.1 |
| RP11-287D  | 1.97E-17 | -0.135832131 | 0.009 | 0.047 | 4.74E-13 | 1.1 |
| ANKUB1     | 2.02E-17 | -0.178130995 | 0.084 | 0.157 | 4.87E-13 | 1.1 |
| PSMF1      | 2.02E-17 | -0.171260675 | 0.049 | 0.109 | 4.88E-13 | 1.1 |
| NTRK2      | 2.08E-17 | 0.314774502  | 0.24  | 0.169 | 5.02E-13 | 1.1 |
| SFT2D2     | 2.10E-17 | -0.201846046 | 0.159 | 0.25  | 5.08E-13 | 1.1 |
| RASA1      | 2.14E-17 | -0.196732322 | 0.138 | 0.225 | 5.15E-13 | 1.1 |
| CA5B       | 2.18E-17 | 0.300091348  | 0.181 | 0.117 | 5.25E-13 | 1.1 |
| INSIG1     | 2.19E-17 | -0.189675835 | 0.06  | 0.124 | 5.27E-13 | 1.1 |
| GLG1       | 2.23E-17 | -0.189823032 | 0.138 | 0.225 | 5.37E-13 | 1.1 |
| TGFBR2     | 2.23E-17 | 0.370928554  | 0.171 | 0.11  | 5.39E-13 | 1.1 |
| PRCC       | 2.25E-17 | -0.148225781 | 0.033 | 0.085 | 5.42E-13 | 1.1 |
| NDUFAF7    | 2.28E-17 | -0.144239738 | 0.028 | 0.079 | 5.50E-13 | 1.1 |
| R3HDM1     | 2.34E-17 | -0.180422398 | 0.025 | 0.074 | 5.63E-13 | 1.1 |
| ARID4B     | 2.34E-17 | 0.376055369  | 0.531 | 0.493 | 5.65E-13 | 1.1 |
| OGDH       | 2.39E-17 | -0.194719865 | 0.062 | 0.126 | 5.76E-13 | 1.1 |
| MLXIP      | 2.46E-17 | -0.167961914 | 0.115 | 0.196 | 5.93E-13 | 1.1 |
| RP11-2012C | 2.50E-17 | -0.119385007 | 0.007 | 0.043 | 6.02E-13 | 1.1 |
| RPS6KA2    | 2.60E-17 | -0.128167551 | 0.059 | 0.123 | 6.26E-13 | 1.1 |
| RP11-692D  | 2.67E-17 | -0.14780446  | 0.006 | 0.042 | 6.43E-13 | 1.1 |
| MSN        | 2.69E-17 | -0.196465351 | 0.375 | 0.498 | 6.48E-13 | 1.1 |
| UQCR10     | 2.80E-17 | -0.190171943 | 0.314 | 0.432 | 6.76E-13 | 1.1 |
| RHBDL2     | 2.89E-17 | -0.131907302 | 0.013 | 0.054 | 6.96E-13 | 1.1 |
| LYPLAL1    | 2.93E-17 | -0.160578374 | 0.038 | 0.093 | 7.08E-13 | 1.1 |
| IRX3       | 3.14E-17 | -0.129239398 | 0.018 | 0.063 | 7.56E-13 | 1.1 |
| ERGIC3     | 3.18E-17 | 0.394401425  | 0.404 | 0.35  | 7.68E-13 | 1.1 |
| ARHGEF9    | 3.24E-17 | -0.13841197  | 0.017 | 0.061 | 7.80E-13 | 1.1 |
| AMN1       | 3.33E-17 | -0.192579097 | 0.078 | 0.147 | 8.02E-13 | 1.1 |
| SYMPK      | 3.38E-17 | -0.171071146 | 0.03  | 0.081 | 8.14E-13 | 1.1 |
| CISD1      | 3.42E-17 | -0.188428333 | 0.158 | 0.248 | 8.26E-13 | 1.1 |
| N4BP1      | 3.43E-17 | -0.233879256 | 0.131 | 0.212 | 8.28E-13 | 1.1 |
| ZNF609     | 3.46E-17 | -0.244675201 | 0.444 | 0.565 | 8.35E-13 | 1.1 |
| AATF       | 3.47E-17 | -0.148362727 | 0.012 | 0.051 | 8.36E-13 | 1.1 |
| HAGH       | 3.52E-17 | -0.123685177 | 0.007 | 0.043 | 8.50E-13 | 1.1 |

|           |          |              |       |       |          |     |
|-----------|----------|--------------|-------|-------|----------|-----|
| RABGGTB   | 3.56E-17 | 0.265845504  | 0.135 | 0.079 | 8.58E-13 | 1.1 |
| BMS1      | 3.57E-17 | -0.161065365 | 0.057 | 0.12  | 8.62E-13 | 1.1 |
| DNAH14    | 3.59E-17 | -0.207141656 | 0.03  | 0.08  | 8.65E-13 | 1.1 |
| SYNRG     | 3.59E-17 | -0.155172672 | 0.023 | 0.07  | 8.67E-13 | 1.1 |
| SPRED1    | 3.61E-17 | -0.192170964 | 0.037 | 0.09  | 8.71E-13 | 1.1 |
| EPB41L5   | 3.65E-17 | -0.144617025 | 0.128 | 0.214 | 8.80E-13 | 1.1 |
| VPS25     | 3.70E-17 | -0.146185226 | 0.077 | 0.147 | 8.91E-13 | 1.1 |
| ZFAND3    | 3.74E-17 | -0.140323029 | 0.536 | 0.675 | 9.03E-13 | 1.1 |
| DNAJC16   | 3.76E-17 | -0.140516638 | 0.022 | 0.069 | 9.07E-13 | 1.1 |
| ANKRD17   | 3.87E-17 | -0.196540488 | 0.348 | 0.472 | 9.34E-13 | 1.1 |
| RP11-115D | 3.92E-17 | -0.141691986 | 0.005 | 0.04  | 9.44E-13 | 1.1 |
| FBXO42    | 3.93E-17 | 0.365049492  | 0.222 | 0.155 | 9.47E-13 | 1.1 |
| NBPF11    | 3.96E-17 | -0.137374185 | 0.025 | 0.074 | 9.55E-13 | 1.1 |
| ZADH2     | 4.17E-17 | -0.127290185 | 0.008 | 0.045 | 1.01E-12 | 1.1 |
| SLC30A5   | 4.32E-17 | -0.144399272 | 0.029 | 0.08  | 1.04E-12 | 1.1 |
| UQCC1     | 4.40E-17 | -0.151591794 | 0.026 | 0.075 | 1.06E-12 | 1.1 |
| CCT6A     | 4.51E-17 | -0.151940438 | 0.074 | 0.142 | 1.09E-12 | 1.1 |
| MGAT4A    | 4.52E-17 | -0.150242431 | 0.017 | 0.06  | 1.09E-12 | 1.1 |
| AMOT      | 4.52E-17 | -0.153559757 | 0.019 | 0.063 | 1.09E-12 | 1.1 |
| RP11-286N | 4.61E-17 | -0.146969066 | 0.017 | 0.06  | 1.11E-12 | 1.1 |
| MYC       | 4.68E-17 | 0.356343624  | 0.196 | 0.131 | 1.13E-12 | 1.1 |
| FAM3C     | 4.69E-17 | -0.194906715 | 0.101 | 0.177 | 1.13E-12 | 1.1 |
| CLEC16A   | 4.74E-17 | -0.205124219 | 0.103 | 0.179 | 1.14E-12 | 1.1 |
| MRPS33    | 4.75E-17 | 0.378382576  | 0.354 | 0.292 | 1.15E-12 | 1.1 |
| KIN       | 4.78E-17 | -0.148248896 | 0.037 | 0.091 | 1.15E-12 | 1.1 |
| HNRNPA2B  | 4.78E-17 | -0.243034669 | 0.339 | 0.452 | 1.15E-12 | 1.1 |
| GAPVD1    | 4.79E-17 | 0.316507841  | 0.261 | 0.19  | 1.16E-12 | 1.1 |
| PPL       | 4.88E-17 | -0.180782631 | 0.053 | 0.113 | 1.18E-12 | 1.1 |
| FANK1     | 4.92E-17 | -0.164724289 | 0.034 | 0.087 | 1.19E-12 | 1.1 |
| PLAUR     | 4.97E-17 | -0.285739671 | 0.127 | 0.206 | 1.20E-12 | 1.1 |
| RP11-318C | 5.09E-17 | -0.143655991 | 0.015 | 0.058 | 1.23E-12 | 1.1 |
| STAT2     | 5.35E-17 | -0.204461355 | 0.051 | 0.11  | 1.29E-12 | 1.1 |
| AP5M1     | 5.41E-17 | -0.153187706 | 0.03  | 0.081 | 1.30E-12 | 1.1 |
| MT-CO2    | 5.60E-17 | -0.202439413 | 0.985 | 0.985 | 1.35E-12 | 1.1 |
| AC004878. | 5.67E-17 | 0.153551103  | 0.046 | 0.016 | 1.37E-12 | 1.1 |
| RP11-508N | 5.89E-17 | -0.138336942 | 0.033 | 0.086 | 1.42E-12 | 1.1 |
| ANKRD26   | 5.89E-17 | -0.175295848 | 0.036 | 0.089 | 1.42E-12 | 1.1 |
| SRPX2     | 5.90E-17 | -0.132921214 | 0.013 | 0.054 | 1.42E-12 | 1.1 |
| AC091153. | 5.90E-17 | 0.104369818  | 0.039 | 0.012 | 1.42E-12 | 1.1 |
| RPA1      | 5.98E-17 | -0.154207852 | 0.027 | 0.076 | 1.44E-12 | 1.1 |
| CBLB      | 6.36E-17 | -0.194724215 | 0.164 | 0.255 | 1.53E-12 | 1.1 |
| XRCC4     | 6.37E-17 | -0.139435044 | 0.02  | 0.064 | 1.54E-12 | 1.1 |
| ZBED5-AS1 | 6.39E-17 | 0.117562217  | 0.043 | 0.014 | 1.54E-12 | 1.1 |
| PHF3      | 6.41E-17 | 0.345521815  | 0.393 | 0.326 | 1.55E-12 | 1.1 |
| P3H2      | 6.47E-17 | -0.210348755 | 0.082 | 0.152 | 1.56E-12 | 1.1 |
| ZNF780B   | 6.52E-17 | -0.143598153 | 0.013 | 0.052 | 1.57E-12 | 1.1 |
| MLLT6     | 6.58E-17 | -0.205014104 | 0.037 | 0.09  | 1.59E-12 | 1.1 |

|           |          |              |       |       |          |     |
|-----------|----------|--------------|-------|-------|----------|-----|
| CFAP161   | 6.62E-17 | -0.153624704 | 0.008 | 0.044 | 1.60E-12 | 1.1 |
| POLR2F    | 6.67E-17 | -0.196779977 | 0.033 | 0.084 | 1.61E-12 | 1.1 |
| MINA      | 6.80E-17 | -0.137720459 | 0.037 | 0.09  | 1.64E-12 | 1.1 |
| ZCCHC7    | 6.96E-17 | -0.243426421 | 0.313 | 0.422 | 1.68E-12 | 1.1 |
| FAM193A   | 6.98E-17 | -0.205866876 | 0.095 | 0.167 | 1.68E-12 | 1.1 |
| TMEM51-A  | 7.01E-17 | -0.135440412 | 0.006 | 0.041 | 1.69E-12 | 1.1 |
| C1orf56   | 7.15E-17 | -0.17084633  | 0.104 | 0.181 | 1.72E-12 | 1.1 |
| ZNF814    | 7.57E-17 | -0.165143664 | 0.05  | 0.108 | 1.82E-12 | 1.1 |
| TMEM63A   | 7.63E-17 | -0.189407764 | 0.033 | 0.084 | 1.84E-12 | 1.1 |
| ANTXR1    | 7.79E-17 | -0.17626747  | 0.023 | 0.068 | 1.88E-12 | 1.1 |
| TOR1AIP2  | 7.99E-17 | 0.373999352  | 0.288 | 0.222 | 1.93E-12 | 1.1 |
| RP11-1H15 | 8.05E-17 | -0.154317203 | 0.046 | 0.104 | 1.94E-12 | 1.1 |
| MUC16     | 8.15E-17 | -0.178919311 | 0.019 | 0.063 | 1.96E-12 | 1.1 |
| TYW1      | 8.26E-17 | -0.151776789 | 0.042 | 0.097 | 1.99E-12 | 1.1 |
| KIAA0368  | 8.39E-17 | -0.197751333 | 0.163 | 0.253 | 2.02E-12 | 1.1 |
| INPP5B    | 8.52E-17 | -0.130966808 | 0.022 | 0.068 | 2.06E-12 | 1.1 |
| SEC24B    | 8.59E-17 | 0.372087278  | 0.348 | 0.282 | 2.07E-12 | 1.1 |
| MGAM      | 8.91E-17 | -0.123378277 | 0.002 | 0.033 | 2.15E-12 | 1.1 |
| DCAF13    | 9.15E-17 | -0.153481394 | 0.043 | 0.099 | 2.21E-12 | 1.1 |
| FAM126B   | 9.30E-17 | 0.372127357  | 0.206 | 0.141 | 2.24E-12 | 1.1 |
| C7orf73   | 9.31E-17 | -0.167675696 | 0.068 | 0.133 | 2.25E-12 | 1.1 |
| PTPN9     | 9.35E-17 | -0.157313179 | 0.035 | 0.087 | 2.25E-12 | 1.1 |
| LCOR      | 9.65E-17 | -0.185801431 | 0.098 | 0.172 | 2.33E-12 | 1.1 |
| KMT5B     | 9.78E-17 | -0.188110084 | 0.106 | 0.182 | 2.36E-12 | 1.1 |
| RNPC3     | 9.80E-17 | -0.171456084 | 0.038 | 0.091 | 2.36E-12 | 1.1 |
| EFCAB14   | 1.01E-16 | -0.164506043 | 0.033 | 0.084 | 2.44E-12 | 1.1 |
| CTC-340D7 | 1.01E-16 | -0.11199855  | 0.004 | 0.037 | 2.44E-12 | 1.1 |
| RP11-93K2 | 1.02E-16 | -0.100354297 | 0.002 | 0.032 | 2.46E-12 | 1.1 |
| TPI1      | 1.04E-16 | -0.260128815 | 0.295 | 0.4   | 2.52E-12 | 1.1 |
| GTF2H2    | 1.09E-16 | -0.129265038 | 0.015 | 0.056 | 2.62E-12 | 1.1 |
| SLC4A7    | 1.09E-16 | -0.2082597   | 0.257 | 0.363 | 2.62E-12 | 1.1 |
| TMEM260   | 1.10E-16 | -0.135314813 | 0.015 | 0.056 | 2.64E-12 | 1.1 |
| PTPN14    | 1.14E-16 | 0.592274176  | 0.478 | 0.45  | 2.74E-12 | 1.1 |
| DRAM2     | 1.14E-16 | -0.165639112 | 0.217 | 0.318 | 2.75E-12 | 1.1 |
| POLR2L    | 1.17E-16 | -0.19527648  | 0.009 | 0.045 | 2.81E-12 | 1.1 |
| PPP4R4    | 1.18E-16 | -0.193510834 | 0.015 | 0.057 | 2.85E-12 | 1.1 |
| B4GALT5   | 1.19E-16 | -0.159960322 | 0.251 | 0.364 | 2.86E-12 | 1.1 |
| COL22A1   | 1.19E-16 | -0.148431138 | 0.008 | 0.044 | 2.86E-12 | 1.1 |
| LIMS1     | 1.19E-16 | 0.510802666  | 0.359 | 0.301 | 2.87E-12 | 1.1 |
| ADCY3     | 1.19E-16 | -0.132818668 | 0.011 | 0.049 | 2.87E-12 | 1.1 |
| BAZ1A     | 1.20E-16 | -0.192681673 | 0.243 | 0.346 | 2.88E-12 | 1.1 |
| MBNL2     | 1.22E-16 | 0.349315888  | 0.451 | 0.391 | 2.94E-12 | 1.1 |
| RPL37A    | 1.22E-16 | 0.150143334  | 0.995 | 0.978 | 2.94E-12 | 1.1 |
| TBC1D9    | 1.22E-16 | -0.203996982 | 0.159 | 0.248 | 2.94E-12 | 1.1 |
| CCDC64    | 1.22E-16 | -0.137590009 | 0.008 | 0.043 | 2.95E-12 | 1.1 |
| TAPT1-AS1 | 1.22E-16 | -0.157506453 | 0.029 | 0.079 | 2.95E-12 | 1.1 |
| TDRD3     | 1.24E-16 | -0.189240281 | 0.038 | 0.09  | 3.00E-12 | 1.1 |



|            |          |              |       |       |          |     |
|------------|----------|--------------|-------|-------|----------|-----|
| OR2A1-AS1  | 1.24E-16 | -0.14331828  | 0.02  | 0.065 | 3.00E-12 | 1.1 |
| RNPEP      | 1.29E-16 | -0.137214279 | 0.023 | 0.068 | 3.11E-12 | 1.1 |
| ZBTB46     | 1.31E-16 | -0.142645023 | 0.03  | 0.079 | 3.15E-12 | 1.1 |
| TSEN2      | 1.33E-16 | -0.123862663 | 0.004 | 0.037 | 3.21E-12 | 1.1 |
| BBS9       | 1.36E-16 | -0.171680092 | 0.029 | 0.078 | 3.29E-12 | 1.1 |
| MTERF4     | 1.37E-16 | -0.163877585 | 0.045 | 0.101 | 3.29E-12 | 1.1 |
| ZNF135     | 1.40E-16 | -0.104968579 | 0.005 | 0.038 | 3.37E-12 | 1.1 |
| NEK9       | 1.42E-16 | -0.150752929 | 0.033 | 0.083 | 3.42E-12 | 1.1 |
| TNFRSF10A  | 1.44E-16 | -0.171894038 | 0.038 | 0.09  | 3.48E-12 | 1.1 |
| ZNF630     | 1.48E-16 | -0.124414351 | 0.005 | 0.038 | 3.56E-12 | 1.1 |
| SNX19      | 1.48E-16 | -0.129880573 | 0.016 | 0.057 | 3.58E-12 | 1.1 |
| LRRC69     | 1.52E-16 | -0.13146503  | 0.017 | 0.059 | 3.65E-12 | 1.1 |
| HLA-E      | 1.54E-16 | -0.247182512 | 0.072 | 0.136 | 3.71E-12 | 1.1 |
| TMEM2      | 1.55E-16 | -0.179086333 | 0.109 | 0.186 | 3.75E-12 | 1.1 |
| OXR1       | 1.56E-16 | -0.162191843 | 0.128 | 0.209 | 3.77E-12 | 1.1 |
| CCDC170    | 1.59E-16 | -0.139188398 | 0.015 | 0.055 | 3.82E-12 | 1.1 |
| NHLRC2     | 1.62E-16 | -0.147861525 | 0.029 | 0.078 | 3.91E-12 | 1.1 |
| CLTC       | 1.64E-16 | -0.176013599 | 0.143 | 0.228 | 3.95E-12 | 1.1 |
| NOL3       | 1.70E-16 | -0.142242465 | 0.019 | 0.062 | 4.10E-12 | 1.1 |
| SRGAP2C    | 1.70E-16 | -0.112855307 | 0.01  | 0.047 | 4.10E-12 | 1.1 |
| SLC5A1     | 1.73E-16 | -0.212961761 | 0.063 | 0.124 | 4.16E-12 | 1.1 |
| WFDC10B    | 1.78E-16 | -0.109770149 | 0.004 | 0.036 | 4.29E-12 | 1.1 |
| CCDC93     | 1.79E-16 | -0.157077707 | 0.071 | 0.137 | 4.33E-12 | 1.1 |
| C3orf38    | 1.88E-16 | -0.126183961 | 0.018 | 0.06  | 4.54E-12 | 1.1 |
| IL12RB1    | 1.89E-16 | -0.141645419 | 0.008 | 0.044 | 4.56E-12 | 1.1 |
| S100A4     | 1.89E-16 | -0.211446346 | 0.055 | 0.113 | 4.57E-12 | 1.1 |
| FAM151B    | 1.93E-16 | -0.140765085 | 0.017 | 0.059 | 4.65E-12 | 1.1 |
| PIK3IP1-AS | 1.95E-16 | -0.155111913 | 0.02  | 0.063 | 4.71E-12 | 1.1 |
| PLD3       | 1.98E-16 | -0.13988676  | 0.015 | 0.056 | 4.78E-12 | 1.1 |
| CALD1      | 1.99E-16 | 0.328542691  | 0.633 | 0.586 | 4.79E-12 | 1.1 |
| SSBP1      | 2.01E-16 | -0.207377851 | 0.358 | 0.473 | 4.84E-12 | 1.1 |
| ZNF761     | 2.02E-16 | -0.120677167 | 0.009 | 0.045 | 4.88E-12 | 1.1 |
| LIPG       | 2.07E-16 | -0.13462549  | 0.006 | 0.04  | 4.99E-12 | 1.1 |
| VKORC1L1   | 2.07E-16 | -0.139379491 | 0.021 | 0.065 | 5.00E-12 | 1.1 |
| TCAIM      | 2.07E-16 | -0.163466604 | 0.029 | 0.077 | 5.00E-12 | 1.1 |
| RBM12B     | 2.10E-16 | -0.132115714 | 0.008 | 0.043 | 5.06E-12 | 1.1 |
| WWC1       | 2.10E-16 | -0.268204892 | 0.371 | 0.483 | 5.07E-12 | 1.1 |
| IFT88      | 2.12E-16 | -0.159547941 | 0.021 | 0.066 | 5.11E-12 | 1.1 |
| AVIL       | 2.17E-16 | -0.143970697 | 0.017 | 0.059 | 5.24E-12 | 1.1 |
| FAM73A     | 2.27E-16 | -0.150304264 | 0.058 | 0.119 | 5.47E-12 | 1.1 |
| WDR60      | 2.27E-16 | -0.196845638 | 0.075 | 0.142 | 5.48E-12 | 1.1 |
| KIAA0040   | 2.33E-16 | -0.166191616 | 0.028 | 0.075 | 5.62E-12 | 1.1 |
| CDC42EP1   | 2.44E-16 | -0.186396495 | 0.023 | 0.068 | 5.88E-12 | 1.1 |
| NAA20      | 2.56E-16 | -0.168596946 | 0.08  | 0.148 | 6.16E-12 | 1.1 |
| NDUFAF6    | 2.70E-16 | -0.134021245 | 0.019 | 0.062 | 6.50E-12 | 1.1 |
| C2         | 2.77E-16 | -0.11991344  | 0.006 | 0.039 | 6.68E-12 | 1.1 |
| SLC25A5    | 2.93E-16 | -0.22148307  | 0.101 | 0.172 | 7.07E-12 | 1.1 |

|           |          |              |       |       |          |     |
|-----------|----------|--------------|-------|-------|----------|-----|
| SLC1A5    | 2.94E-16 | -0.128938554 | 0.016 | 0.057 | 7.09E-12 | 1.1 |
| METAP1D   | 3.03E-16 | 0.111598905  | 0.042 | 0.014 | 7.31E-12 | 1.1 |
| FADS1     | 3.07E-16 | -0.124100357 | 0.005 | 0.038 | 7.39E-12 | 1.1 |
| LINC00657 | 3.07E-16 | -0.164100977 | 0.1   | 0.173 | 7.41E-12 | 1.1 |
| KALRN     | 3.09E-16 | -0.149416464 | 0.08  | 0.148 | 7.45E-12 | 1.1 |
| NFIA      | 3.10E-16 | -0.22906941  | 0.08  | 0.146 | 7.47E-12 | 1.1 |
| STC2      | 3.29E-16 | -0.154312186 | 0.011 | 0.049 | 7.94E-12 | 1.1 |
| MPZL2     | 3.30E-16 | -0.164986361 | 0.079 | 0.146 | 7.96E-12 | 1.1 |
| RP11-499P | 3.42E-16 | -0.141629891 | 0.012 | 0.05  | 8.24E-12 | 1.1 |
| UGDH-AS1  | 3.46E-16 | -0.121538679 | 0.019 | 0.062 | 8.33E-12 | 1.1 |
| OSBPL3    | 3.47E-16 | -0.142553112 | 0.027 | 0.074 | 8.37E-12 | 1.1 |
| CLSTN1    | 3.50E-16 | -0.148570822 | 0.039 | 0.091 | 8.45E-12 | 1.1 |
| TTN-AS1   | 3.51E-16 | -0.146649031 | 0.024 | 0.069 | 8.46E-12 | 1.1 |
| ATP8B1    | 3.52E-16 | 0.595879536  | 0.368 | 0.319 | 8.50E-12 | 1.1 |
| NRBF2     | 3.58E-16 | -0.137311581 | 0.034 | 0.084 | 8.63E-12 | 1.1 |
| IL27RA    | 3.73E-16 | -0.12622061  | 0.012 | 0.05  | 8.98E-12 | 1.1 |
| CLASP1    | 3.77E-16 | -0.208939915 | 0.19  | 0.28  | 9.09E-12 | 1.1 |
| RB1CC1    | 3.86E-16 | -0.132933299 | 0.314 | 0.436 | 9.31E-12 | 1.1 |
| KCTD13    | 4.05E-16 | -0.116698482 | 0.008 | 0.043 | 9.77E-12 | 1.1 |
| VPS8      | 4.14E-16 | -0.170022574 | 0.044 | 0.099 | 9.98E-12 | 1.1 |
| UPF2      | 4.15E-16 | -0.1524057   | 0.213 | 0.311 | 1.00E-11 | 1.1 |
| CLCN6     | 4.18E-16 | -0.116701275 | 0.008 | 0.043 | 1.01E-11 | 1.1 |
| TGFA      | 4.21E-16 | -0.161076155 | 0.05  | 0.107 | 1.02E-11 | 1.1 |
| VPS39     | 4.27E-16 | -0.129397142 | 0.012 | 0.05  | 1.03E-11 | 1.1 |
| TLE4      | 4.29E-16 | 0.430851879  | 0.442 | 0.392 | 1.03E-11 | 1.1 |
| LINC00662 | 4.43E-16 | -0.16517976  | 0.045 | 0.099 | 1.07E-11 | 1.1 |
| NCOA2     | 4.52E-16 | -0.200261917 | 0.403 | 0.533 | 1.09E-11 | 1.1 |
| ERGIC2    | 4.59E-16 | -0.181380443 | 0.146 | 0.23  | 1.11E-11 | 1.1 |
| TRAPPC13  | 4.62E-16 | -0.143583076 | 0.025 | 0.071 | 1.11E-11 | 1.1 |
| IDO1      | 4.65E-16 | -0.325042697 | 0.011 | 0.048 | 1.12E-11 | 1.1 |
| CERS5     | 4.85E-16 | -0.15454554  | 0.03  | 0.078 | 1.17E-11 | 1.1 |
| ALS2CL    | 5.12E-16 | -0.118075962 | 0.001 | 0.03  | 1.23E-11 | 1.1 |
| RNASE1    | 5.30E-16 | -0.178510959 | 0.013 | 0.051 | 1.28E-11 | 1.1 |
| NDRG1     | 5.34E-16 | 0.674485907  | 0.475 | 0.447 | 1.29E-11 | 1.1 |
| FSTL1     | 5.34E-16 | -0.181923242 | 0.069 | 0.131 | 1.29E-11 | 1.1 |
| RP5-1180E | 5.63E-16 | -0.121636007 | 0.011 | 0.048 | 1.36E-11 | 1.1 |
| SLC23A2   | 5.70E-16 | -0.146986305 | 0.029 | 0.076 | 1.37E-11 | 1.1 |
| NIF3L1    | 5.72E-16 | -0.140205906 | 0.028 | 0.076 | 1.38E-11 | 1.1 |
| RAB11FIP3 | 5.75E-16 | -0.186176144 | 0.04  | 0.093 | 1.39E-11 | 1.1 |
| ATXN7L3B  | 6.25E-16 | -0.142859752 | 0.022 | 0.065 | 1.51E-11 | 1.1 |
| GRPEL1    | 6.27E-16 | -0.123430554 | 0.027 | 0.073 | 1.51E-11 | 1.1 |
| WDR33     | 6.42E-16 | 0.337247952  | 0.359 | 0.296 | 1.55E-11 | 1.1 |
| RP11-759A | 6.65E-16 | -0.121128934 | 0.008 | 0.043 | 1.60E-11 | 1.1 |
| KANSL1L   | 6.71E-16 | -0.16728455  | 0.126 | 0.207 | 1.62E-11 | 1.1 |
| NTN1      | 6.90E-16 | -0.152348278 | 0.101 | 0.174 | 1.66E-11 | 1.1 |
| KLF9      | 6.95E-16 | -0.161598157 | 0.08  | 0.147 | 1.68E-11 | 1.1 |
| ABL1      | 7.13E-16 | -0.214001381 | 0.084 | 0.15  | 1.72E-11 | 1.1 |

|           |          |              |       |       |          |     |
|-----------|----------|--------------|-------|-------|----------|-----|
| NRDC      | 7.15E-16 | -0.138545709 | 0.118 | 0.197 | 1.73E-11 | 1.1 |
| PJA2      | 7.25E-16 | 0.371532419  | 0.278 | 0.211 | 1.75E-11 | 1.1 |
| DNMBP     | 7.32E-16 | -0.123191565 | 0.011 | 0.048 | 1.77E-11 | 1.1 |
| LINC00866 | 7.37E-16 | 0.282280013  | 0.038 | 0.012 | 1.78E-11 | 1.1 |
| GTF3C2    | 7.47E-16 | -0.152820835 | 0.034 | 0.083 | 1.80E-11 | 1.1 |
| PAN3      | 7.71E-16 | 0.37117322   | 0.581 | 0.573 | 1.86E-11 | 1.1 |
| RAB1A     | 7.80E-16 | 0.383179775  | 0.481 | 0.445 | 1.88E-11 | 1.1 |
| TBC1D4    | 7.80E-16 | -0.23673434  | 0.092 | 0.16  | 1.88E-11 | 1.1 |
| SLC15A1   | 7.95E-16 | -0.129282714 | 0.008 | 0.042 | 1.92E-11 | 1.1 |
| MPP6      | 8.26E-16 | -0.155707607 | 0.038 | 0.088 | 1.99E-11 | 1.1 |
| IPO9      | 8.90E-16 | -0.147244963 | 0.035 | 0.085 | 2.14E-11 | 1.1 |
| CCDC71L   | 9.03E-16 | -0.111822515 | 0.013 | 0.05  | 2.18E-11 | 1.1 |
| NRDE2     | 9.39E-16 | -0.121917177 | 0.012 | 0.05  | 2.26E-11 | 1.1 |
| TUBA1C    | 9.65E-16 | -0.187872456 | 0.283 | 0.385 | 2.33E-11 | 1.1 |
| CASC8     | 9.82E-16 | 0.207684243  | 0.128 | 0.075 | 2.37E-11 | 1.1 |
| SLC37A1   | 9.83E-16 | -0.129536431 | 0.02  | 0.062 | 2.37E-11 | 1.1 |
| ETS1      | 9.85E-16 | -0.177484657 | 0.09  | 0.16  | 2.38E-11 | 1.1 |
| CDK5RAP2  | 9.90E-16 | -0.143239871 | 0.027 | 0.073 | 2.39E-11 | 1.1 |
| KLHL36    | 9.90E-16 | -0.114425816 | 0.009 | 0.044 | 2.39E-11 | 1.1 |
| SCLT1     | 1.05E-15 | -0.16381108  | 0.018 | 0.058 | 2.53E-11 | 1.1 |
| PLEKHM3   | 1.07E-15 | -0.136417257 | 0.018 | 0.059 | 2.59E-11 | 1.1 |
| ATP2C1    | 1.08E-15 | -0.144920474 | 0.14  | 0.223 | 2.62E-11 | 1.1 |
| SPOPL     | 1.09E-15 | 0.285517413  | 0.197 | 0.134 | 2.62E-11 | 1.1 |
| VWA8      | 1.09E-15 | -0.17400716  | 0.031 | 0.079 | 2.63E-11 | 1.1 |
| CLDN8     | 1.11E-15 | -0.107284847 | 0.047 | 0.102 | 2.67E-11 | 1.1 |
| TBC1D10A  | 1.11E-15 | 0.692922359  | 0.157 | 0.102 | 2.67E-11 | 1.1 |
| DST       | 1.12E-15 | -0.160499377 | 0.501 | 0.628 | 2.70E-11 | 1.1 |
| STAT5A    | 1.12E-15 | -0.171004601 | 0.035 | 0.084 | 2.71E-11 | 1.1 |
| PTP4A1    | 1.16E-15 | 0.459355439  | 0.258 | 0.193 | 2.79E-11 | 1.1 |
| USP45     | 1.17E-15 | -0.115329794 | 0.02  | 0.063 | 2.81E-11 | 1.1 |
| CLEC1A    | 1.18E-15 | -0.105074895 | 0.005 | 0.037 | 2.84E-11 | 1.1 |
| STAT4     | 1.21E-15 | -0.113995893 | 0.002 | 0.03  | 2.91E-11 | 1.1 |
| CECR7     | 1.22E-15 | -0.147474307 | 0.047 | 0.101 | 2.94E-11 | 1.1 |
| NSMAF     | 1.25E-15 | -0.162541835 | 0.052 | 0.108 | 3.01E-11 | 1.1 |
| USP8      | 1.31E-15 | -0.14554847  | 0.127 | 0.206 | 3.17E-11 | 1.1 |
| ULK2      | 1.33E-15 | -0.126998241 | 0.012 | 0.049 | 3.20E-11 | 1.1 |
| NFX1      | 1.39E-15 | -0.127275753 | 0.108 | 0.184 | 3.35E-11 | 1.1 |
| RTCB      | 1.40E-15 | 0.364680856  | 0.482 | 0.441 | 3.38E-11 | 1.1 |
| APTX      | 1.40E-15 | -0.112799631 | 0.091 | 0.161 | 3.39E-11 | 1.1 |
| CPSF2     | 1.43E-15 | -0.134026006 | 0.018 | 0.059 | 3.44E-11 | 1.1 |
| CCL5      | 1.44E-15 | -0.155580371 | 0.003 | 0.033 | 3.47E-11 | 1.1 |
| PDE7A     | 1.48E-15 | -0.203145361 | 0.196 | 0.288 | 3.56E-11 | 1.1 |
| CCDC126   | 1.48E-15 | 0.224418746  | 0.103 | 0.056 | 3.57E-11 | 1.1 |
| GSKIP     | 1.49E-15 | -0.10478394  | 0.018 | 0.059 | 3.60E-11 | 1.1 |
| MTMR9     | 1.54E-15 | -0.107809433 | 0.005 | 0.037 | 3.71E-11 | 1.1 |
| MCU       | 1.55E-15 | -0.162291509 | 0.05  | 0.105 | 3.74E-11 | 1.1 |
| AASDH     | 1.57E-15 | -0.120834146 | 0.024 | 0.068 | 3.79E-11 | 1.1 |

|           |          |              |       |       |          |     |
|-----------|----------|--------------|-------|-------|----------|-----|
| STEAP3    | 1.57E-15 | -0.143861855 | 0.015 | 0.055 | 3.80E-11 | 1.1 |
| ERICH1    | 1.58E-15 | -0.146634928 | 0.013 | 0.05  | 3.80E-11 | 1.1 |
| CCDC90B   | 1.60E-15 | -0.141992859 | 0.055 | 0.113 | 3.87E-11 | 1.1 |
| PGD       | 1.63E-15 | -0.150997325 | 0.031 | 0.079 | 3.92E-11 | 1.1 |
| MLLT10    | 1.64E-15 | -0.159332877 | 0.11  | 0.185 | 3.96E-11 | 1.1 |
| CMIP      | 1.66E-15 | -0.14903449  | 0.28  | 0.389 | 3.99E-11 | 1.1 |
| DUSP5     | 1.66E-15 | -0.154993541 | 0.034 | 0.082 | 4.01E-11 | 1.1 |
| STAU2     | 1.71E-15 | -0.166021681 | 0.054 | 0.111 | 4.13E-11 | 1.1 |
| CXorf23   | 1.72E-15 | -0.123681769 | 0.023 | 0.067 | 4.16E-11 | 1.1 |
| RNF19B    | 1.76E-15 | -0.193715911 | 0.117 | 0.191 | 4.24E-11 | 1.1 |
| REL       | 1.76E-15 | 0.390424138  | 0.283 | 0.221 | 4.24E-11 | 1.1 |
| CBWD2     | 1.77E-15 | -0.130941844 | 0.022 | 0.065 | 4.26E-11 | 1.1 |
| HLA-C     | 1.81E-15 | -0.191376979 | 0.169 | 0.255 | 4.35E-11 | 1.1 |
| PHF20L1   | 1.82E-15 | -0.201601014 | 0.084 | 0.149 | 4.40E-11 | 1.1 |
| DPH6      | 1.85E-15 | -0.183453017 | 0.034 | 0.082 | 4.47E-11 | 1.1 |
| BRD8      | 1.94E-15 | -0.167065534 | 0.035 | 0.083 | 4.67E-11 | 1.1 |
| ARFGAP3   | 1.96E-15 | -0.137922572 | 0.125 | 0.202 | 4.74E-11 | 1.1 |
| CFLAR-AS1 | 2.00E-15 | -0.135791823 | 0.045 | 0.099 | 4.81E-11 | 1.1 |
| RAB14     | 2.00E-15 | 0.302585154  | 0.164 | 0.106 | 4.81E-11 | 1.1 |
| ACAT2     | 2.01E-15 | -0.265163264 | 0.223 | 0.315 | 4.85E-11 | 1.1 |
| ARMT1     | 2.01E-15 | -0.148825645 | 0.049 | 0.104 | 4.85E-11 | 1.1 |
| RHOJ      | 2.07E-15 | -0.108653088 | 0.009 | 0.043 | 4.98E-11 | 1.1 |
| IDI1      | 2.08E-15 | -0.12052717  | 0.152 | 0.238 | 5.02E-11 | 1.1 |
| FAM84B    | 2.11E-15 | -0.145907881 | 0.029 | 0.075 | 5.10E-11 | 1.1 |
| C9orf84   | 2.17E-15 | -0.117584591 | 0.008 | 0.042 | 5.23E-11 | 1.1 |
| USO1      | 2.17E-15 | -0.162298373 | 0.126 | 0.204 | 5.23E-11 | 1.1 |
| PPP6R3    | 2.21E-15 | 0.376411393  | 0.459 | 0.419 | 5.32E-11 | 1.1 |
| ZNF644    | 2.23E-15 | -0.195058124 | 0.261 | 0.368 | 5.37E-11 | 1.1 |
| FBXO2     | 2.24E-15 | -0.110272671 | 0.003 | 0.032 | 5.41E-11 | 1.1 |
| ZFP36L1   | 2.26E-15 | -0.195957364 | 0.444 | 0.554 | 5.44E-11 | 1.1 |
| CHD1      | 2.28E-15 | 0.384562335  | 0.28  | 0.215 | 5.49E-11 | 1.1 |
| CAB39     | 2.28E-15 | -0.200768879 | 0.209 | 0.302 | 5.50E-11 | 1.1 |
| SLC25A17  | 2.30E-15 | -0.139210563 | 0.022 | 0.065 | 5.56E-11 | 1.1 |
| AC023590. | 2.34E-15 | -0.112618149 | 0.013 | 0.05  | 5.64E-11 | 1.1 |
| CCNC      | 2.52E-15 | -0.180590026 | 0.198 | 0.288 | 6.09E-11 | 1.1 |
| WDR41     | 2.55E-15 | -0.168446911 | 0.059 | 0.116 | 6.15E-11 | 1.1 |
| IFNGR1    | 2.64E-15 | -0.216148957 | 0.193 | 0.28  | 6.35E-11 | 1.1 |
| ACAD10    | 2.78E-15 | -0.105338327 | 0.006 | 0.038 | 6.71E-11 | 1.1 |
| RP11-530C | 2.83E-15 | -0.140799231 | 0.015 | 0.053 | 6.82E-11 | 1.1 |
| EIF1AX    | 2.88E-15 | 0.360490466  | 0.284 | 0.221 | 6.95E-11 | 1.1 |
| PLXNA2    | 2.95E-15 | -0.150047603 | 0.013 | 0.05  | 7.12E-11 | 1.1 |
| LCMT1     | 2.99E-15 | -0.143062008 | 0.038 | 0.089 | 7.21E-11 | 1.1 |
| TRAPPC11  | 3.05E-15 | -0.1442021   | 0.03  | 0.077 | 7.35E-11 | 1.1 |
| HNRNPU-A  | 3.10E-15 | -0.165976335 | 0.041 | 0.092 | 7.46E-11 | 1.1 |
| FRMD3     | 3.11E-15 | -0.184016899 | 0.051 | 0.107 | 7.51E-11 | 1.1 |
| CASP8AP2  | 3.19E-15 | -0.125818956 | 0.018 | 0.059 | 7.70E-11 | 1.1 |
| RBM8A     | 3.33E-15 | -0.152092339 | 0.423 | 0.542 | 8.02E-11 | 1.1 |

|            |          |              |       |       |          |     |
|------------|----------|--------------|-------|-------|----------|-----|
| TNFAIP1    | 3.36E-15 | -0.139847407 | 0.041 | 0.093 | 8.09E-11 | 1.1 |
| CETN3      | 3.43E-15 | -0.108866841 | 0.018 | 0.057 | 8.26E-11 | 1.1 |
| HSF2       | 3.47E-15 | 0.248344864  | 0.12  | 0.071 | 8.36E-11 | 1.1 |
| PSMD13     | 3.47E-15 | -0.143223649 | 0.041 | 0.093 | 8.37E-11 | 1.1 |
| PSMA3      | 3.50E-15 | -0.275879769 | 0.365 | 0.466 | 8.43E-11 | 1.1 |
| BET1L      | 3.52E-15 | -0.108505377 | 0.013 | 0.05  | 8.48E-11 | 1.1 |
| PPP1R12A   | 3.55E-15 | -0.176748298 | 0.151 | 0.233 | 8.56E-11 | 1.1 |
| RP11-415J8 | 3.65E-15 | -0.143587301 | 0.028 | 0.073 | 8.79E-11 | 1.1 |
| ZNFX1      | 3.66E-15 | -0.162291957 | 0.085 | 0.151 | 8.82E-11 | 1.1 |
| ANO6       | 3.81E-15 | -0.146615467 | 0.272 | 0.383 | 9.19E-11 | 1.1 |
| DNAJC11    | 3.85E-15 | -0.144198083 | 0.02  | 0.062 | 9.29E-11 | 1.1 |
| DNAJC9     | 3.95E-15 | -0.150273255 | 0.027 | 0.071 | 9.53E-11 | 1.1 |
| RP11-745L  | 3.99E-15 | -0.153326968 | 0.031 | 0.078 | 9.63E-11 | 1.1 |
| HSD17B2    | 4.07E-15 | -0.174257808 | 0.032 | 0.079 | 9.81E-11 | 1.1 |
| C9orf72    | 4.19E-15 | -0.151712496 | 0.046 | 0.099 | 1.01E-10 | 1.1 |
| LINC01481  | 4.24E-15 | -0.170520538 | 0.023 | 0.066 | 1.02E-10 | 1.1 |
| TUBA1A     | 4.25E-15 | -0.27542017  | 0.193 | 0.276 | 1.03E-10 | 1.1 |
| FRAS1      | 4.30E-15 | -0.18106723  | 0.03  | 0.077 | 1.04E-10 | 1.1 |
| LINC01482  | 4.37E-15 | -0.133944131 | 0.006 | 0.038 | 1.05E-10 | 1.1 |
| MMP24-AS   | 4.46E-15 | -0.12869142  | 0.015 | 0.054 | 1.08E-10 | 1.1 |
| KDM1B      | 4.52E-15 | -0.123863443 | 0.032 | 0.079 | 1.09E-10 | 1.1 |
| REST       | 4.65E-15 | -0.148629937 | 0.037 | 0.086 | 1.12E-10 | 1.1 |
| RNF10      | 4.84E-15 | 0.276178342  | 0.216 | 0.153 | 1.17E-10 | 1.1 |
| RPS29      | 4.84E-15 | 0.137001896  | 0.976 | 0.962 | 1.17E-10 | 1.1 |
| CEP290     | 4.87E-15 | -0.159023573 | 0.035 | 0.083 | 1.17E-10 | 1.1 |
| PKNOX1     | 4.89E-15 | -0.136070717 | 0.014 | 0.051 | 1.18E-10 | 1.1 |
| RP11-519G  | 4.91E-15 | -0.26692035  | 0.053 | 0.107 | 1.18E-10 | 1.1 |
| NMRK1      | 4.97E-15 | -0.103471921 | 0.007 | 0.039 | 1.20E-10 | 1.1 |
| MCM9       | 5.01E-15 | -0.136595395 | 0.015 | 0.052 | 1.21E-10 | 1.1 |
| ARPC1B     | 5.03E-15 | -0.111881985 | 0.006 | 0.038 | 1.21E-10 | 1.1 |
| PIP4K2A    | 5.13E-15 | -0.126575777 | 0.022 | 0.063 | 1.24E-10 | 1.1 |
| FAM171A1   | 5.15E-15 | -0.186571819 | 0.036 | 0.084 | 1.24E-10 | 1.1 |
| ZCCHC9     | 5.17E-15 | -0.128880935 | 0.031 | 0.077 | 1.25E-10 | 1.1 |
| ZBTB7C     | 5.31E-15 | -0.154593159 | 0.013 | 0.049 | 1.28E-10 | 1.1 |
| MICAL3     | 5.33E-15 | 0.385140249  | 0.349 | 0.285 | 1.29E-10 | 1.1 |
| SDK1       | 5.47E-15 | -0.220785803 | 0.05  | 0.103 | 1.32E-10 | 1.1 |
| HNRNPA3    | 5.48E-15 | 0.317011816  | 0.386 | 0.325 | 1.32E-10 | 1.1 |
| TOM1L1     | 5.56E-15 | -0.222746565 | 0.152 | 0.23  | 1.34E-10 | 1.1 |
| GGNBP2     | 5.59E-15 | -0.154381373 | 0.146 | 0.229 | 1.35E-10 | 1.1 |
| SP3        | 5.63E-15 | -0.147916959 | 0.1   | 0.171 | 1.36E-10 | 1.1 |
| LINC00623  | 5.79E-15 | -0.133421492 | 0.015 | 0.053 | 1.40E-10 | 1.1 |
| SYCP3      | 5.85E-15 | -0.132064027 | 0.008 | 0.04  | 1.41E-10 | 1.1 |
| MBIP       | 5.94E-15 | 0.283744616  | 0.208 | 0.146 | 1.43E-10 | 1.1 |
| HERPUD2    | 5.97E-15 | -0.119967713 | 0.014 | 0.051 | 1.44E-10 | 1.1 |
| RAB9A      | 5.98E-15 | 0.358018578  | 0.254 | 0.19  | 1.44E-10 | 1.1 |
| KIF13A     | 6.03E-15 | 0.516743784  | 0.314 | 0.256 | 1.45E-10 | 1.1 |
| TUBA1B     | 6.24E-15 | -0.211971515 | 0.206 | 0.295 | 1.50E-10 | 1.1 |

|           |          |              |       |       |          |     |
|-----------|----------|--------------|-------|-------|----------|-----|
| TAB2      | 6.24E-15 | 0.360716275  | 0.316 | 0.254 | 1.50E-10 | 1.1 |
| FAM234B   | 6.36E-15 | 0.155377331  | 0.055 | 0.023 | 1.53E-10 | 1.1 |
| SLC9A3R1  | 6.40E-15 | -0.143422735 | 0.048 | 0.101 | 1.54E-10 | 1.1 |
| EPRS      | 6.41E-15 | -0.18341339  | 0.101 | 0.17  | 1.55E-10 | 1.1 |
| TMEM154   | 6.50E-15 | -0.141381262 | 0.025 | 0.069 | 1.57E-10 | 1.1 |
| IGFBP7    | 6.51E-15 | -0.152089293 | 0.003 | 0.032 | 1.57E-10 | 1.1 |
| TRIP12    | 6.54E-15 | -0.162377664 | 0.207 | 0.303 | 1.58E-10 | 1.1 |
| CCM2      | 6.55E-15 | -0.128097158 | 0.014 | 0.051 | 1.58E-10 | 1.1 |
| KCND2     | 6.75E-15 | -0.275503684 | 0.049 | 0.102 | 1.63E-10 | 1.1 |
| APPBP2    | 6.77E-15 | -0.17963048  | 0.066 | 0.125 | 1.63E-10 | 1.1 |
| HADH      | 6.80E-15 | 0.44183017   | 0.251 | 0.189 | 1.64E-10 | 1.1 |
| C5orf42   | 6.82E-15 | -0.127179862 | 0.018 | 0.057 | 1.65E-10 | 1.1 |
| SLC25A46  | 6.89E-15 | -0.129613405 | 0.013 | 0.05  | 1.66E-10 | 1.1 |
| PACRGL    | 6.98E-15 | -0.111763475 | 0.012 | 0.047 | 1.68E-10 | 1.1 |
| TMEM135   | 6.99E-15 | -0.158686694 | 0.04  | 0.091 | 1.69E-10 | 1.1 |
| EHMT1     | 7.26E-15 | -0.153256001 | 0.116 | 0.192 | 1.75E-10 | 1.1 |
| TCHP      | 7.41E-15 | -0.163169065 | 0.014 | 0.05  | 1.79E-10 | 1.1 |
| ZNF213    | 7.45E-15 | -0.120309723 | 0.009 | 0.042 | 1.80E-10 | 1.1 |
| EDA       | 7.45E-15 | -0.160123455 | 0.03  | 0.075 | 1.80E-10 | 1.1 |
| PIGN      | 7.49E-15 | -0.158511488 | 0.067 | 0.126 | 1.81E-10 | 1.1 |
| DNTTIP2   | 7.77E-15 | -0.141768576 | 0.155 | 0.238 | 1.87E-10 | 1.1 |
| KCNC4     | 7.92E-15 | -0.124656865 | 0.01  | 0.043 | 1.91E-10 | 1.1 |
| DTNBP1    | 8.10E-15 | -0.15530343  | 0.025 | 0.069 | 1.95E-10 | 1.1 |
| COX4I1    | 8.30E-15 | 0.292891753  | 0.77  | 0.789 | 2.00E-10 | 1.1 |
| GRB10     | 8.48E-15 | -0.20098892  | 0.089 | 0.154 | 2.04E-10 | 1.1 |
| RGCC      | 8.77E-15 | 0.188310716  | 0.084 | 0.043 | 2.11E-10 | 1.1 |
| TMEM167/  | 9.02E-15 | -0.204199061 | 0.203 | 0.29  | 2.17E-10 | 1.1 |
| ATL2      | 9.03E-15 | -0.201885391 | 0.216 | 0.309 | 2.18E-10 | 1.1 |
| C2CD2     | 9.12E-15 | -0.13151852  | 0.021 | 0.062 | 2.20E-10 | 1.1 |
| MED27     | 9.20E-15 | -0.140424621 | 0.028 | 0.073 | 2.22E-10 | 1.1 |
| MKNK1     | 9.22E-15 | -0.113233169 | 0.019 | 0.059 | 2.22E-10 | 1.1 |
| LIMK2     | 9.35E-15 | -0.191661429 | 0.082 | 0.145 | 2.26E-10 | 1.1 |
| MRPL24    | 9.65E-15 | 0.218975008  | 0.094 | 0.051 | 2.33E-10 | 1.1 |
| CUTC      | 9.71E-15 | -0.137757378 | 0.023 | 0.065 | 2.34E-10 | 1.1 |
| PRMT3     | 1.05E-14 | -0.13085622  | 0.009 | 0.042 | 2.53E-10 | 1.1 |
| C14orf159 | 1.05E-14 | -0.139744727 | 0.033 | 0.08  | 2.53E-10 | 1.1 |
| HMBOX1    | 1.05E-14 | -0.149987764 | 0.158 | 0.242 | 2.53E-10 | 1.1 |
| CALU      | 1.08E-14 | -0.164479489 | 0.224 | 0.318 | 2.60E-10 | 1.1 |
| PRDM2     | 1.10E-14 | 0.324138501  | 0.358 | 0.297 | 2.66E-10 | 1.1 |
| SLC44A1   | 1.12E-14 | -0.118281296 | 0.051 | 0.106 | 2.70E-10 | 1.1 |
| GNPDA2    | 1.15E-14 | -0.104951376 | 0.012 | 0.048 | 2.77E-10 | 1.1 |
| MACROD2   | 1.20E-14 | -0.216612618 | 0.198 | 0.285 | 2.89E-10 | 1.1 |
| RP11-77K1 | 1.22E-14 | -0.10654807  | 0.008 | 0.041 | 2.94E-10 | 1.1 |
| SFI1      | 1.22E-14 | -0.124967265 | 0.023 | 0.065 | 2.95E-10 | 1.1 |
| ITGB6     | 1.24E-14 | 0.408257747  | 0.36  | 0.299 | 3.00E-10 | 1.1 |
| TMEM59    | 1.25E-14 | -0.152586244 | 0.265 | 0.367 | 3.01E-10 | 1.1 |
| RP11-37B2 | 1.28E-14 | -0.18156598  | 0.225 | 0.317 | 3.08E-10 | 1.1 |

|            |          |              |       |       |          |     |
|------------|----------|--------------|-------|-------|----------|-----|
| HSBP1      | 1.30E-14 | -0.150844841 | 0.396 | 0.514 | 3.14E-10 | 1.1 |
| LINC00324  | 1.31E-14 | 0.130848576  | 0.043 | 0.016 | 3.16E-10 | 1.1 |
| VAT1       | 1.33E-14 | -0.166090529 | 0.076 | 0.137 | 3.21E-10 | 1.1 |
| NUP50-AS1  | 1.33E-14 | -0.120096137 | 0.007 | 0.038 | 3.22E-10 | 1.1 |
| AP1S3      | 1.35E-14 | 0.257878314  | 0.108 | 0.062 | 3.25E-10 | 1.1 |
| LINC01549  | 1.35E-14 | -0.230023197 | 0.011 | 0.045 | 3.25E-10 | 1.1 |
| CH507-528  | 1.35E-14 | -0.106146258 | 0.008 | 0.04  | 3.27E-10 | 1.1 |
| RHOT1      | 1.37E-14 | -0.1496559   | 0.053 | 0.107 | 3.32E-10 | 1.1 |
| KCTD1      | 1.40E-14 | -0.119977149 | 0.018 | 0.056 | 3.38E-10 | 1.1 |
| KDM4C      | 1.41E-14 | -0.12262602  | 0.034 | 0.081 | 3.40E-10 | 1.1 |
| PDP1       | 1.41E-14 | -0.156606515 | 0.05  | 0.102 | 3.41E-10 | 1.1 |
| TUBD1      | 1.44E-14 | -0.100359282 | 0.02  | 0.059 | 3.46E-10 | 1.1 |
| DIAPH2-AS  | 1.48E-14 | -0.116491666 | 0.013 | 0.049 | 3.57E-10 | 1.1 |
| RP11-1069  | 1.52E-14 | -0.114251071 | 0.008 | 0.04  | 3.66E-10 | 1.1 |
| KLHL28     | 1.52E-14 | -0.127861027 | 0.04  | 0.089 | 3.68E-10 | 1.1 |
| ZNF621     | 1.53E-14 | -0.136150856 | 0.025 | 0.068 | 3.70E-10 | 1.1 |
| CYP4A22-A  | 1.54E-14 | -0.100181811 | 0.003 | 0.03  | 3.72E-10 | 1.1 |
| URI1       | 1.55E-14 | -0.165286982 | 0.093 | 0.159 | 3.74E-10 | 1.1 |
| SH3RF3     | 1.57E-14 | -0.104082832 | 0.004 | 0.032 | 3.77E-10 | 1.1 |
| RAB11FIP2  | 1.58E-14 | -0.129450397 | 0.013 | 0.048 | 3.80E-10 | 1.1 |
| EIF4EBP2   | 1.60E-14 | -0.157423446 | 0.074 | 0.134 | 3.85E-10 | 1.1 |
| ZNF26      | 1.60E-14 | -0.115966653 | 0.014 | 0.05  | 3.85E-10 | 1.1 |
| BEX5       | 1.63E-14 | 0.153073951  | 0.055 | 0.023 | 3.92E-10 | 1.1 |
| CCDC34     | 1.65E-14 | 0.105113438  | 0.037 | 0.012 | 3.97E-10 | 1.1 |
| CDK19      | 1.65E-14 | -0.131868978 | 0.199 | 0.29  | 3.98E-10 | 1.1 |
| BAMBI      | 1.70E-14 | -0.138014121 | 0.042 | 0.092 | 4.09E-10 | 1.1 |
| ADAMTS4    | 1.71E-14 | -0.135799876 | 0.003 | 0.031 | 4.12E-10 | 1.1 |
| MACF1      | 1.73E-14 | 0.377143032  | 0.639 | 0.632 | 4.17E-10 | 1.1 |
| SPATA6     | 1.75E-14 | -0.130618167 | 0.013 | 0.049 | 4.21E-10 | 1.1 |
| C1RL-AS1   | 1.78E-14 | -0.116232724 | 0.007 | 0.038 | 4.28E-10 | 1.1 |
| PVT1       | 1.81E-14 | 0.307872505  | 0.43  | 0.375 | 4.36E-10 | 1.1 |
| GHITM      | 1.81E-14 | -0.246654679 | 0.409 | 0.507 | 4.37E-10 | 1.1 |
| RP11-38611 | 1.87E-14 | 0.157136162  | 0.055 | 0.023 | 4.51E-10 | 1.1 |
| AL592183.1 | 1.88E-14 | -0.152795293 | 0.049 | 0.101 | 4.54E-10 | 1.1 |
| MRPL19     | 1.94E-14 | -0.132056059 | 0.028 | 0.071 | 4.68E-10 | 1.1 |
| SNTB2      | 1.96E-14 | -0.104629781 | 0.005 | 0.033 | 4.72E-10 | 1.1 |
| TBC1D32    | 1.98E-14 | -0.179711826 | 0.024 | 0.066 | 4.78E-10 | 1.1 |
| USP44      | 2.02E-14 | -0.113280101 | 0.008 | 0.04  | 4.87E-10 | 1.1 |
| ZNRF1      | 2.10E-14 | -0.127263109 | 0.049 | 0.101 | 5.06E-10 | 1.1 |
| ZMYND11    | 2.13E-14 | -0.130559514 | 0.068 | 0.128 | 5.13E-10 | 1.1 |
| CASZ1      | 2.17E-14 | 0.168002142  | 0.089 | 0.047 | 5.23E-10 | 1.1 |
| FAM172A    | 2.20E-14 | 0.375654292  | 0.75  | 0.747 | 5.31E-10 | 1.1 |
| MSL1       | 2.21E-14 | -0.132621668 | 0.047 | 0.098 | 5.32E-10 | 1.1 |
| PPP3CB     | 2.23E-14 | -0.140033255 | 0.045 | 0.096 | 5.37E-10 | 1.1 |
| ST7L       | 2.24E-14 | -0.117987671 | 0.02  | 0.06  | 5.41E-10 | 1.1 |
| CAMTA1     | 2.27E-14 | 0.379419054  | 0.548 | 0.514 | 5.48E-10 | 1.1 |
| PRKD3      | 2.36E-14 | -0.134604436 | 0.093 | 0.16  | 5.70E-10 | 1.1 |

|            |          |              |       |       |          |     |
|------------|----------|--------------|-------|-------|----------|-----|
| ACOX1      | 2.37E-14 | -0.120998741 | 0.018 | 0.056 | 5.72E-10 | 1.1 |
| RP11-544A  | 2.44E-14 | -0.134162586 | 0.022 | 0.062 | 5.87E-10 | 1.1 |
| ZNF565     | 2.44E-14 | -0.165672845 | 0.123 | 0.196 | 5.87E-10 | 1.1 |
| PKN2       | 2.47E-14 | -0.153849135 | 0.185 | 0.274 | 5.95E-10 | 1.1 |
| NSA2       | 2.51E-14 | 0.331393537  | 0.451 | 0.407 | 6.06E-10 | 1.1 |
| DCTN2      | 2.57E-14 | -0.150471265 | 0.081 | 0.143 | 6.20E-10 | 1.1 |
| SP140L     | 2.58E-14 | -0.13988892  | 0.019 | 0.058 | 6.23E-10 | 1.1 |
| MASTL      | 2.59E-14 | -0.120698529 | 0.022 | 0.062 | 6.26E-10 | 1.1 |
| CYB5B      | 2.60E-14 | -0.132313078 | 0.112 | 0.182 | 6.28E-10 | 1.1 |
| LNX1       | 2.67E-14 | -0.174982095 | 0.055 | 0.108 | 6.45E-10 | 1.1 |
| TM9SF3     | 2.68E-14 | 0.339317106  | 0.324 | 0.265 | 6.47E-10 | 1.1 |
| TMOD3      | 2.71E-14 | -0.159068859 | 0.218 | 0.312 | 6.54E-10 | 1.1 |
| PDE6D      | 2.75E-14 | -0.135186959 | 0.015 | 0.051 | 6.64E-10 | 1.1 |
| MIS12      | 2.76E-14 | -0.113143975 | 0.013 | 0.048 | 6.66E-10 | 1.1 |
| PRPF40B    | 2.91E-14 | -0.139033924 | 0.011 | 0.045 | 7.01E-10 | 1.1 |
| SLC25A6    | 2.91E-14 | -0.274598855 | 0.093 | 0.155 | 7.01E-10 | 1.1 |
| MAT2B      | 2.99E-14 | -0.12371155  | 0.023 | 0.064 | 7.21E-10 | 1.1 |
| XRCC5      | 3.01E-14 | -0.185312139 | 0.279 | 0.38  | 7.26E-10 | 1.1 |
| WDR27      | 3.01E-14 | -0.127961487 | 0.016 | 0.053 | 7.26E-10 | 1.1 |
| GLYATL2    | 3.08E-14 | -0.108265166 | 0.038 | 0.087 | 7.42E-10 | 1.1 |
| PCLO       | 3.09E-14 | -0.171469074 | 0.018 | 0.055 | 7.45E-10 | 1.1 |
| ZC4H2      | 3.11E-14 | -0.119592384 | 0.012 | 0.046 | 7.49E-10 | 1.1 |
| TFAP2C     | 3.12E-14 | -0.159436258 | 0.078 | 0.14  | 7.52E-10 | 1.1 |
| GALNT10    | 3.12E-14 | -0.125837978 | 0.013 | 0.048 | 7.53E-10 | 1.1 |
| KDM2B      | 3.14E-14 | -0.134624172 | 0.021 | 0.06  | 7.56E-10 | 1.1 |
| SLC25A43   | 3.17E-14 | -0.126947811 | 0.023 | 0.063 | 7.65E-10 | 1.1 |
| DSTYK      | 3.18E-14 | -0.116135943 | 0.03  | 0.074 | 7.67E-10 | 1.1 |
| ZSCAN5A    | 3.23E-14 | -0.11398196  | 0.01  | 0.042 | 7.78E-10 | 1.1 |
| CNNM2      | 3.34E-14 | -0.132571953 | 0.024 | 0.066 | 8.05E-10 | 1.1 |
| VPS37A     | 3.37E-14 | -0.148495818 | 0.029 | 0.073 | 8.13E-10 | 1.1 |
| TAF1       | 3.56E-14 | -0.151404365 | 0.083 | 0.146 | 8.58E-10 | 1.1 |
| APLP2      | 3.65E-14 | -0.133320127 | 0.083 | 0.147 | 8.79E-10 | 1.1 |
| AC027119.  | 3.71E-14 | -0.105649242 | 0.001 | 0.025 | 8.94E-10 | 1.1 |
| EEPD1      | 3.71E-14 | 0.218077468  | 0.086 | 0.046 | 8.96E-10 | 1.1 |
| RPS12      | 3.79E-14 | 0.459446833  | 0.717 | 0.742 | 9.13E-10 | 1.1 |
| STXBP3     | 3.80E-14 | -0.133156871 | 0.065 | 0.123 | 9.15E-10 | 1.1 |
| TRIM47     | 3.89E-14 | -0.104572289 | 0.003 | 0.03  | 9.38E-10 | 1.1 |
| C21orf62-A | 3.90E-14 | -0.107470352 | 0.008 | 0.04  | 9.40E-10 | 1.1 |
| ARHGEF7    | 3.90E-14 | 0.326028975  | 0.217 | 0.157 | 9.40E-10 | 1.1 |
| SFT2D1     | 3.90E-14 | -0.155583369 | 0.03  | 0.074 | 9.41E-10 | 1.1 |
| SOCS6      | 4.03E-14 | -0.146690554 | 0.078 | 0.139 | 9.72E-10 | 1.1 |
| MAVS       | 4.05E-14 | -0.133979423 | 0.028 | 0.071 | 9.76E-10 | 1.1 |
| ASAP1      | 4.15E-14 | -0.135285617 | 0.179 | 0.265 | 1.00E-09 | 1.1 |
| BAZ1B      | 4.28E-14 | -0.125471039 | 0.103 | 0.171 | 1.03E-09 | 1.1 |
| TRAPPC12   | 4.29E-14 | -0.109140662 | 0.008 | 0.038 | 1.04E-09 | 1.1 |
| DFFA       | 4.31E-14 | -0.128188309 | 0.03  | 0.074 | 1.04E-09 | 1.1 |
| DENND4C    | 4.36E-14 | -0.190542573 | 0.156 | 0.236 | 1.05E-09 | 1.1 |



|          |          |              |       |       |          |     |
|----------|----------|--------------|-------|-------|----------|-----|
| TNFRSF21 | 4.42E-14 | -0.163266733 | 0.035 | 0.08  | 1.07E-09 | 1.1 |
| RNF14    | 4.53E-14 | -0.106025538 | 0.015 | 0.051 | 1.09E-09 | 1.1 |
| XDH      | 4.54E-14 | -0.265038252 | 0.073 | 0.132 | 1.09E-09 | 1.1 |
| CTDSPL   | 4.64E-14 | -0.140536743 | 0.031 | 0.075 | 1.12E-09 | 1.1 |
| PTGS2    | 4.66E-14 | -0.259178707 | 0.005 | 0.033 | 1.12E-09 | 1.1 |
| CSRNP1   | 4.71E-14 | 0.119874148  | 0.049 | 0.02  | 1.14E-09 | 1.1 |
| USP4     | 4.81E-14 | -0.151678853 | 0.053 | 0.106 | 1.16E-09 | 1.1 |
| MT1E     | 4.88E-14 | -0.437893531 | 0.015 | 0.05  | 1.18E-09 | 1.1 |
| METTL3   | 4.88E-14 | -0.13351993  | 0.022 | 0.062 | 1.18E-09 | 1.1 |
| AKNA     | 4.96E-14 | -0.107006354 | 0.007 | 0.037 | 1.20E-09 | 1.1 |
| TRMT10C  | 5.03E-14 | -0.142420208 | 0.082 | 0.144 | 1.21E-09 | 1.1 |
| GNPTAB   | 5.07E-14 | -0.144618289 | 0.068 | 0.127 | 1.22E-09 | 1.1 |
| PARP9    | 5.15E-14 | -0.116576322 | 0.024 | 0.065 | 1.24E-09 | 1.1 |
| CCBL2    | 5.36E-14 | -0.133412253 | 0.076 | 0.137 | 1.29E-09 | 1.1 |
| TAP1     | 5.43E-14 | -0.117979564 | 0.008 | 0.039 | 1.31E-09 | 1.1 |
| ABHD5    | 5.47E-14 | -0.106813344 | 0.11  | 0.181 | 1.32E-09 | 1.1 |
| CD24     | 5.48E-14 | -0.271309443 | 0.5   | 0.594 | 1.32E-09 | 1.1 |
| HNRNP2   | 5.49E-14 | -0.119744279 | 0.164 | 0.248 | 1.32E-09 | 1.1 |
| SERINC3  | 5.65E-14 | -0.168323616 | 0.129 | 0.201 | 1.36E-09 | 1.1 |
| KITLG    | 5.69E-14 | -0.101650529 | 0.005 | 0.033 | 1.37E-09 | 1.1 |
| CEBPD    | 5.75E-14 | -0.167660804 | 0.162 | 0.242 | 1.39E-09 | 1.1 |
| PIGP     | 5.79E-14 | 0.273344106  | 0.204 | 0.146 | 1.40E-09 | 1.1 |
| CHDH     | 5.79E-14 | -0.153695514 | 0.024 | 0.065 | 1.40E-09 | 1.1 |
| PCMTD1   | 5.90E-14 | -0.197870849 | 0.246 | 0.339 | 1.42E-09 | 1.1 |
| SDAD1    | 5.96E-14 | -0.161351907 | 0.05  | 0.102 | 1.44E-09 | 1.1 |
| FMNL2    | 6.00E-14 | -0.102934506 | 0.35  | 0.474 | 1.45E-09 | 1.1 |
| SLC35F3  | 6.02E-14 | -0.157766436 | 0.023 | 0.063 | 1.45E-09 | 1.1 |
| ZNF800   | 6.06E-14 | -0.128274524 | 0.046 | 0.096 | 1.46E-09 | 1.1 |
| MRPL35   | 6.06E-14 | -0.11129956  | 0.028 | 0.07  | 1.46E-09 | 1.1 |
| RNF115   | 6.40E-14 | 0.485571422  | 0.28  | 0.225 | 1.54E-09 | 1.1 |
| TBC1D16  | 6.41E-14 | -0.12688874  | 0.015 | 0.05  | 1.54E-09 | 1.1 |
| INTS8    | 6.45E-14 | -0.104683056 | 0.01  | 0.042 | 1.56E-09 | 1.1 |
| KCNJ2    | 6.46E-14 | -0.101218169 | 0.004 | 0.031 | 1.56E-09 | 1.1 |
| ZNF385D  | 6.47E-14 | -0.176388236 | 0.033 | 0.078 | 1.56E-09 | 1.1 |
| S100A7   | 6.71E-14 | -0.602699932 | 0.007 | 0.037 | 1.62E-09 | 1.1 |
| IQCB1    | 7.17E-14 | -0.176060429 | 0.059 | 0.113 | 1.73E-09 | 1.1 |
| TMEM126/ | 7.24E-14 | 0.237963057  | 0.164 | 0.11  | 1.75E-09 | 1.1 |
| RIN3     | 7.27E-14 | -0.119031116 | 0.013 | 0.047 | 1.75E-09 | 1.1 |
| SERPINA1 | 7.33E-14 | -0.149509821 | 0.011 | 0.044 | 1.77E-09 | 1.1 |
| RAB7A    | 7.36E-14 | 0.353662538  | 0.424 | 0.377 | 1.78E-09 | 1.1 |
| ZNF677   | 7.40E-14 | -0.117993488 | 0.025 | 0.066 | 1.78E-09 | 1.1 |
| ADPGK    | 7.52E-14 | -0.138738906 | 0.024 | 0.065 | 1.81E-09 | 1.1 |
| AP3B1    | 7.57E-14 | -0.174805109 | 0.133 | 0.205 | 1.82E-09 | 1.1 |
| ZNRF3    | 7.62E-14 | -0.120690109 | 0.014 | 0.049 | 1.84E-09 | 1.1 |
| UBQLN1   | 7.94E-14 | 0.286988071  | 0.295 | 0.233 | 1.91E-09 | 1.1 |
| ABHD12   | 7.99E-14 | -0.149828706 | 0.014 | 0.048 | 1.93E-09 | 1.1 |
| HCG17    | 8.19E-14 | -0.14276733  | 0.035 | 0.08  | 1.98E-09 | 1.1 |

|          |          |              |       |       |          |     |
|----------|----------|--------------|-------|-------|----------|-----|
| PLAU     | 8.37E-14 | -0.113844975 | 0.007 | 0.037 | 2.02E-09 | 1.1 |
| FCF1     | 8.42E-14 | -0.130892475 | 0.031 | 0.075 | 2.03E-09 | 1.1 |
| GSTP1    | 8.50E-14 | -0.280706751 | 0.043 | 0.09  | 2.05E-09 | 1.1 |
| YWHAQ    | 8.51E-14 | 0.42041352   | 0.411 | 0.362 | 2.05E-09 | 1.1 |
| ARL6IP6  | 8.53E-14 | -0.122459688 | 0.024 | 0.064 | 2.06E-09 | 1.1 |
| MPHOSPH8 | 8.56E-14 | -0.112334178 | 0.014 | 0.048 | 2.07E-09 | 1.1 |
| NUDT2    | 8.68E-14 | 0.264797101  | 0.184 | 0.129 | 2.09E-09 | 1.1 |
| FOXK1    | 8.70E-14 | 0.256359817  | 0.19  | 0.132 | 2.10E-09 | 1.1 |
| ELMOD2   | 9.12E-14 | -0.132129704 | 0.026 | 0.068 | 2.20E-09 | 1.1 |
| UCK2     | 9.13E-14 | -0.217971591 | 0.12  | 0.189 | 2.20E-09 | 1.1 |
| NKTR     | 9.26E-14 | -0.173573899 | 0.235 | 0.328 | 2.23E-09 | 1.1 |
| MTCH2    | 9.48E-14 | -0.142498717 | 0.04  | 0.087 | 2.29E-09 | 1.1 |
| ZNF169   | 9.49E-14 | -0.104685751 | 0.007 | 0.036 | 2.29E-09 | 1.1 |
| RPRD1A   | 9.56E-14 | -0.157338537 | 0.08  | 0.14  | 2.31E-09 | 1.1 |
| ATRX     | 9.64E-14 | -0.117202476 | 0.352 | 0.461 | 2.32E-09 | 1.1 |
| MBD4     | 9.68E-14 | -0.118198391 | 0.02  | 0.058 | 2.33E-09 | 1.1 |
| RBM5     | 9.72E-14 | -0.18131719  | 0.108 | 0.176 | 2.34E-09 | 1.1 |
| SRGAP3   | 1.00E-13 | -0.154388374 | 0.033 | 0.078 | 2.41E-09 | 1.1 |
| DNAJA1   | 1.00E-13 | -0.118663233 | 0.185 | 0.27  | 2.42E-09 | 1.1 |
| OLMALINC | 1.01E-13 | -0.111919659 | 0.015 | 0.051 | 2.43E-09 | 1.1 |
| EFNA1    | 1.01E-13 | -0.165712717 | 0.07  | 0.126 | 2.44E-09 | 1.1 |
| RPGR     | 1.02E-13 | -0.139548018 | 0.026 | 0.067 | 2.45E-09 | 1.1 |
| INIP     | 1.02E-13 | -0.104249034 | 0.029 | 0.072 | 2.45E-09 | 1.1 |
| NABP1    | 1.02E-13 | -0.169234179 | 0.035 | 0.08  | 2.46E-09 | 1.1 |
| ETV6     | 1.04E-13 | 0.255891307  | 0.684 | 0.677 | 2.50E-09 | 1.1 |
| RNF216   | 1.05E-13 | -0.149283379 | 0.094 | 0.159 | 2.52E-09 | 1.1 |
| IQGAP1   | 1.05E-13 | 0.314420164  | 0.469 | 0.421 | 2.54E-09 | 1.1 |
| SERGEF   | 1.06E-13 | -0.127346594 | 0.011 | 0.044 | 2.55E-09 | 1.1 |
| AGPAT3   | 1.06E-13 | -0.129622937 | 0.036 | 0.081 | 2.56E-09 | 1.1 |
| OGT      | 1.07E-13 | 0.362799736  | 0.406 | 0.355 | 2.58E-09 | 1.1 |
| SNIP1    | 1.07E-13 | 0.142057335  | 0.062 | 0.029 | 2.58E-09 | 1.1 |
| ELMO1    | 1.07E-13 | -0.106412024 | 0.007 | 0.036 | 2.58E-09 | 1.1 |
| SUPT16H  | 1.08E-13 | -0.121913838 | 0.04  | 0.087 | 2.59E-09 | 1.1 |
| TMEM263  | 1.08E-13 | 0.213424469  | 0.145 | 0.092 | 2.61E-09 | 1.1 |
| CDC42EP5 | 1.12E-13 | -0.108297254 | 0.01  | 0.042 | 2.69E-09 | 1.1 |
| KANSL1   | 1.14E-13 | -0.186583509 | 0.307 | 0.409 | 2.74E-09 | 1.1 |
| OVOL2    | 1.15E-13 | -0.136175233 | 0.033 | 0.077 | 2.78E-09 | 1.1 |
| ZNF133   | 1.15E-13 | -0.10168333  | 0.011 | 0.044 | 2.78E-09 | 1.1 |
| GLB1     | 1.18E-13 | -0.102741249 | 0.012 | 0.045 | 2.85E-09 | 1.1 |
| ZNF440   | 1.19E-13 | -0.11177314  | 0.01  | 0.042 | 2.88E-09 | 1.1 |
| DYRK2    | 1.19E-13 | 0.139198125  | 0.06  | 0.027 | 2.88E-09 | 1.1 |
| METTL16  | 1.20E-13 | -0.164748449 | 0.133 | 0.206 | 2.88E-09 | 1.1 |
| FARP2    | 1.20E-13 | -0.144470941 | 0.045 | 0.095 | 2.90E-09 | 1.1 |
| BTRC     | 1.21E-13 | -0.153271205 | 0.085 | 0.147 | 2.91E-09 | 1.1 |
| XPNPEP1  | 1.22E-13 | -0.147793019 | 0.085 | 0.146 | 2.94E-09 | 1.1 |
| DPY30    | 1.25E-13 | -0.14812019  | 0.114 | 0.184 | 3.01E-09 | 1.1 |
| SLC25A24 | 1.25E-13 | -0.113864969 | 0.03  | 0.073 | 3.01E-09 | 1.1 |

|           |          |              |       |       |          |     |
|-----------|----------|--------------|-------|-------|----------|-----|
| ANXA1     | 1.26E-13 | 0.110101667  | 0.889 | 0.913 | 3.03E-09 | 1.1 |
| POLN      | 1.28E-13 | -0.133457803 | 0.01  | 0.042 | 3.08E-09 | 1.1 |
| KDM3A     | 1.28E-13 | 0.251227066  | 0.148 | 0.095 | 3.09E-09 | 1.1 |
| DNMT3A    | 1.28E-13 | -0.14556786  | 0.03  | 0.072 | 3.10E-09 | 1.1 |
| H2AFJ     | 1.32E-13 | -0.138906206 | 0.011 | 0.044 | 3.19E-09 | 1.1 |
| SPATS2L   | 1.33E-13 | -0.18874776  | 0.213 | 0.3   | 3.21E-09 | 1.1 |
| NCOA5     | 1.33E-13 | -0.132311006 | 0.016 | 0.052 | 3.21E-09 | 1.1 |
| TMEM41B   | 1.37E-13 | 0.366480006  | 0.239 | 0.182 | 3.30E-09 | 1.1 |
| NHSL1     | 1.37E-13 | -0.104247    | 0.147 | 0.223 | 3.31E-09 | 1.1 |
| KIFC3     | 1.39E-13 | -0.117264573 | 0.017 | 0.053 | 3.35E-09 | 1.1 |
| PCID2     | 1.41E-13 | -0.141549151 | 0.073 | 0.13  | 3.39E-09 | 1.1 |
| PC        | 1.42E-13 | -0.102337701 | 0.007 | 0.037 | 3.42E-09 | 1.1 |
| STX7      | 1.44E-13 | -0.170275865 | 0.11  | 0.177 | 3.48E-09 | 1.1 |
| TRIOBP    | 1.47E-13 | -0.118071648 | 0.014 | 0.048 | 3.53E-09 | 1.1 |
| SRSF6     | 1.47E-13 | -0.147307092 | 0.049 | 0.099 | 3.55E-09 | 1.1 |
| RP11-613M | 1.48E-13 | -0.132176367 | 0.033 | 0.077 | 3.56E-09 | 1.1 |
| ANKRA2    | 1.52E-13 | -0.125493625 | 0.034 | 0.079 | 3.65E-09 | 1.1 |
| SDK2      | 1.53E-13 | 0.327728523  | 0.101 | 0.058 | 3.69E-09 | 1.1 |
| SLC35D2   | 1.53E-13 | -0.128400653 | 0.032 | 0.076 | 3.69E-09 | 1.1 |
| RP11-779O | 1.55E-13 | 0.396328474  | 0.259 | 0.199 | 3.75E-09 | 1.1 |
| AP1B1     | 1.57E-13 | -0.124104454 | 0.011 | 0.044 | 3.78E-09 | 1.1 |
| TNRC6B    | 1.59E-13 | -0.123046492 | 0.334 | 0.449 | 3.82E-09 | 1.1 |
| TAF2      | 1.61E-13 | -0.134876064 | 0.045 | 0.094 | 3.88E-09 | 1.1 |
| IKZF2     | 1.69E-13 | -0.146463442 | 0.02  | 0.057 | 4.07E-09 | 1.1 |
| RERG      | 1.72E-13 | -0.225594863 | 0.108 | 0.175 | 4.14E-09 | 1.1 |
| IDH3A     | 1.72E-13 | -0.120789419 | 0.042 | 0.089 | 4.14E-09 | 1.1 |
| CTTN      | 1.72E-13 | -0.184547671 | 0.123 | 0.194 | 4.16E-09 | 1.1 |
| PSORS1C1  | 1.73E-13 | -0.106440106 | 0.021 | 0.06  | 4.17E-09 | 1.1 |
| DHRS3     | 1.73E-13 | -0.1812003   | 0.054 | 0.105 | 4.17E-09 | 1.1 |
| RP11-353M | 1.75E-13 | -0.115651035 | 0.003 | 0.029 | 4.22E-09 | 1.1 |
| FOXJ3     | 1.75E-13 | 0.374816353  | 0.335 | 0.28  | 4.22E-09 | 1.1 |
| PDE9A     | 1.77E-13 | -0.142816877 | 0.041 | 0.088 | 4.26E-09 | 1.1 |
| ELP2      | 1.84E-13 | 0.27758429   | 0.211 | 0.152 | 4.43E-09 | 1.1 |
| RAP2B     | 1.85E-13 | 0.388409007  | 0.232 | 0.176 | 4.47E-09 | 1.1 |
| TAF1B     | 1.87E-13 | -0.118502502 | 0.056 | 0.108 | 4.50E-09 | 1.1 |
| IGF2BP2-A | 1.87E-13 | 0.187507413  | 0.074 | 0.038 | 4.50E-09 | 1.1 |
| LRRC37A2  | 1.87E-13 | -0.103255215 | 0.013 | 0.047 | 4.51E-09 | 1.1 |
| ICE2      | 1.88E-13 | -0.113841219 | 0.023 | 0.061 | 4.54E-09 | 1.1 |
| RBAK-RBAK | 1.94E-13 | -0.142649313 | 0.03  | 0.073 | 4.68E-09 | 1.1 |
| GPATCH2   | 2.00E-13 | -0.115159959 | 0.037 | 0.083 | 4.83E-09 | 1.1 |
| C1orf21   | 2.01E-13 | 0.405214601  | 0.268 | 0.209 | 4.85E-09 | 1.1 |
| MRPS5     | 2.04E-13 | -0.113452495 | 0.027 | 0.068 | 4.93E-09 | 1.1 |
| AK9       | 2.06E-13 | -0.133465095 | 0.028 | 0.07  | 4.97E-09 | 1.1 |
| RPL23A    | 2.13E-13 | 0.35854628   | 0.707 | 0.729 | 5.15E-09 | 1.1 |
| MFSD14A   | 2.14E-13 | 0.275967742  | 0.176 | 0.122 | 5.16E-09 | 1.1 |
| RP11-91P2 | 2.17E-13 | -0.128500956 | 0.02  | 0.057 | 5.22E-09 | 1.1 |
| SETX      | 2.18E-13 | -0.118607144 | 0.112 | 0.182 | 5.26E-09 | 1.1 |

|           |          |              |       |       |          |     |
|-----------|----------|--------------|-------|-------|----------|-----|
| BTBD10    | 2.21E-13 | -0.150631698 | 0.033 | 0.075 | 5.32E-09 | 1.1 |
| AC097721. | 2.25E-13 | -0.102091333 | 0.005 | 0.033 | 5.42E-09 | 1.1 |
| ACVR2A    | 2.26E-13 | -0.135001127 | 0.022 | 0.06  | 5.44E-09 | 1.1 |
| ATXN2     | 2.27E-13 | -0.143362589 | 0.214 | 0.306 | 5.46E-09 | 1.1 |
| IL10RB    | 2.28E-13 | -0.113744178 | 0.011 | 0.043 | 5.49E-09 | 1.1 |
| BROX      | 2.30E-13 | -0.124842612 | 0.09  | 0.153 | 5.54E-09 | 1.1 |
| PSMC1     | 2.33E-13 | -0.187109291 | 0.291 | 0.388 | 5.61E-09 | 1.1 |
| DNM2      | 2.37E-13 | -0.112283385 | 0.037 | 0.083 | 5.71E-09 | 1.1 |
| TIMM17A   | 2.37E-13 | -0.124822928 | 0.162 | 0.243 | 5.72E-09 | 1.1 |
| HMGCR     | 2.51E-13 | -0.124340047 | 0.032 | 0.075 | 6.05E-09 | 1.1 |
| TNFRSF11A | 2.52E-13 | 0.340668822  | 0.172 | 0.118 | 6.07E-09 | 1.1 |
| GSN       | 2.62E-13 | -0.197569423 | 0.133 | 0.202 | 6.31E-09 | 1.1 |
| VPS41     | 2.62E-13 | -0.148940425 | 0.045 | 0.093 | 6.33E-09 | 1.1 |
| PSMC2     | 2.62E-13 | -0.155444205 | 0.221 | 0.309 | 6.33E-09 | 1.1 |
| GPALPP1   | 2.63E-13 | -0.103784608 | 0.015 | 0.05  | 6.33E-09 | 1.1 |
| TMOD1     | 2.65E-13 | -0.160131304 | 0.083 | 0.142 | 6.38E-09 | 1.1 |
| NDUFAB1   | 2.68E-13 | -0.116898166 | 0.025 | 0.064 | 6.47E-09 | 1.1 |
| PANK3     | 2.69E-13 | -0.13834429  | 0.053 | 0.104 | 6.49E-09 | 1.1 |
| DDX23     | 2.71E-13 | -0.120645761 | 0.02  | 0.057 | 6.53E-09 | 1.1 |
| TIMMDC1   | 2.75E-13 | -0.116357461 | 0.024 | 0.063 | 6.63E-09 | 1.1 |
| RBMS1     | 2.77E-13 | -0.113339333 | 0.201 | 0.29  | 6.67E-09 | 1.1 |
| GTF2H2C   | 2.79E-13 | -0.132274819 | 0.028 | 0.068 | 6.72E-09 | 1.1 |
| GATAD1    | 2.81E-13 | -0.11731198  | 0.015 | 0.049 | 6.78E-09 | 1.1 |
| WDR89     | 2.82E-13 | -0.106381128 | 0.011 | 0.042 | 6.80E-09 | 1.1 |
| GATSL2    | 2.82E-13 | 0.100052968  | 0.044 | 0.017 | 6.81E-09 | 1.1 |
| SMARCC1   | 2.92E-13 | -0.163789385 | 0.19  | 0.275 | 7.03E-09 | 1.1 |
| ARRB1     | 2.95E-13 | -0.101653667 | 0.005 | 0.033 | 7.11E-09 | 1.1 |
| ZNF264    | 2.95E-13 | -0.122701291 | 0.028 | 0.068 | 7.12E-09 | 1.1 |
| POU2F3    | 3.05E-13 | -0.185694619 | 0.119 | 0.186 | 7.35E-09 | 1.1 |
| PCGF5     | 3.06E-13 | 0.335462258  | 0.223 | 0.166 | 7.38E-09 | 1.1 |
| SLC1A3    | 3.06E-13 | -0.121793171 | 0.023 | 0.062 | 7.38E-09 | 1.1 |
| CARS      | 3.10E-13 | -0.159882476 | 0.054 | 0.105 | 7.47E-09 | 1.1 |
| TRAPPC3   | 3.11E-13 | -0.129552021 | 0.04  | 0.086 | 7.50E-09 | 1.1 |
| ENTPD5    | 3.15E-13 | -0.114709109 | 0.012 | 0.044 | 7.59E-09 | 1.1 |
| SLC27A1   | 3.15E-13 | -0.111858128 | 0.022 | 0.06  | 7.59E-09 | 1.1 |
| CIR1      | 3.31E-13 | -0.123812566 | 0.226 | 0.321 | 7.98E-09 | 1.1 |
| LRRK1     | 3.40E-13 | -0.139190687 | 0.048 | 0.096 | 8.19E-09 | 1.1 |
| UGT2B7    | 3.41E-13 | -0.110049269 | 0.022 | 0.06  | 8.22E-09 | 1.1 |
| UFD1L     | 3.42E-13 | -0.126340379 | 0.037 | 0.081 | 8.24E-09 | 1.1 |
| SCRN1     | 3.52E-13 | -0.142594194 | 0.033 | 0.076 | 8.48E-09 | 1.1 |
| KAZN      | 3.72E-13 | -0.135422193 | 0.1   | 0.166 | 8.98E-09 | 1.1 |
| C15orf57  | 3.79E-13 | -0.114232519 | 0.037 | 0.081 | 9.15E-09 | 1.1 |
| ZMYM4-AS  | 3.87E-13 | -0.104912925 | 0.018 | 0.054 | 9.34E-09 | 1.1 |
| UBE3B     | 4.07E-13 | -0.109767304 | 0.014 | 0.048 | 9.81E-09 | 1.1 |
| PLA2G4A   | 4.08E-13 | -0.14528851  | 0.022 | 0.059 | 9.84E-09 | 1.1 |
| WBP2      | 4.10E-13 | -0.144953216 | 0.025 | 0.063 | 9.89E-09 | 1.1 |
| ZMYM1     | 4.17E-13 | -0.114868146 | 0.027 | 0.067 | 1.00E-08 | 1.1 |

|            |          |              |       |       |          |     |
|------------|----------|--------------|-------|-------|----------|-----|
| FOSB       | 4.22E-13 | 0.385708177  | 0.458 | 0.414 | 1.02E-08 | 1.1 |
| ZCCHC6     | 4.43E-13 | -0.145501192 | 0.274 | 0.371 | 1.07E-08 | 1.1 |
| RP11-289H  | 4.47E-13 | -0.105369019 | 0.019 | 0.055 | 1.08E-08 | 1.1 |
| UBP1       | 4.57E-13 | -0.125450505 | 0.039 | 0.084 | 1.10E-08 | 1.1 |
| RALGPS1    | 4.65E-13 | -0.1113465   | 0.019 | 0.055 | 1.12E-08 | 1.1 |
| CAMSAP2    | 4.71E-13 | -0.150328613 | 0.084 | 0.144 | 1.14E-08 | 1.1 |
| CTD-3252C  | 4.72E-13 | -0.145540771 | 0.053 | 0.103 | 1.14E-08 | 1.1 |
| DLG3       | 4.75E-13 | -0.119182137 | 0.027 | 0.067 | 1.15E-08 | 1.1 |
| TCN1       | 4.79E-13 | -0.194062315 | 0.012 | 0.044 | 1.15E-08 | 1.1 |
| AC018890.  | 4.79E-13 | -0.194550329 | 0.126 | 0.195 | 1.16E-08 | 1.1 |
| RP11-306I1 | 4.84E-13 | 0.100223369  | 0.03  | 0.009 | 1.17E-08 | 1.1 |
| SLC35B3    | 4.88E-13 | -0.108897207 | 0.013 | 0.045 | 1.18E-08 | 1.1 |
| FAM188A    | 4.96E-13 | -0.10825947  | 0.011 | 0.043 | 1.20E-08 | 1.1 |
| MCEE       | 4.99E-13 | -0.104694714 | 0.011 | 0.042 | 1.20E-08 | 1.1 |
| AES        | 5.08E-13 | -0.107915611 | 0.013 | 0.045 | 1.23E-08 | 1.1 |
| RP11-138A  | 5.10E-13 | -0.13453166  | 0.035 | 0.079 | 1.23E-08 | 1.1 |
| LINC00486  | 5.13E-13 | -0.109801432 | 0.988 | 0.995 | 1.24E-08 | 1.1 |
| CTGF       | 5.45E-13 | 0.295769768  | 0.058 | 0.026 | 1.31E-08 | 1.1 |
| CEP162     | 5.51E-13 | -0.110541888 | 0.015 | 0.049 | 1.33E-08 | 1.1 |
| ZNF880     | 5.52E-13 | -0.110500643 | 0.015 | 0.048 | 1.33E-08 | 1.1 |
| HEY2       | 5.54E-13 | 0.143939647  | 0.058 | 0.026 | 1.34E-08 | 1.1 |
| NDUFS2     | 5.56E-13 | -0.129766784 | 0.026 | 0.066 | 1.34E-08 | 1.1 |
| STK4       | 5.56E-13 | -0.121685073 | 0.02  | 0.057 | 1.34E-08 | 1.1 |
| MCFD2      | 5.58E-13 | -0.123850652 | 0.108 | 0.173 | 1.35E-08 | 1.1 |
| ALDOA      | 5.85E-13 | -0.316997225 | 0.08  | 0.136 | 1.41E-08 | 1.1 |
| SRGN       | 6.08E-13 | -0.313299494 | 0.011 | 0.042 | 1.47E-08 | 1.1 |
| C7orf49    | 6.30E-13 | -0.100000795 | 0.008 | 0.038 | 1.52E-08 | 1.1 |
| POGK       | 6.31E-13 | -0.115369743 | 0.027 | 0.067 | 1.52E-08 | 1.1 |
| SRBD1      | 6.37E-13 | -0.123042389 | 0.031 | 0.072 | 1.54E-08 | 1.1 |
| ZNF107     | 6.56E-13 | -0.135728047 | 0.042 | 0.087 | 1.58E-08 | 1.1 |
| RPLP0      | 6.58E-13 | 0.276278251  | 0.891 | 0.907 | 1.59E-08 | 1.1 |
| FBXO34     | 6.59E-13 | -0.15473903  | 0.137 | 0.209 | 1.59E-08 | 1.1 |
| C12orf65   | 6.77E-13 | -0.108769914 | 0.03  | 0.071 | 1.63E-08 | 1.1 |
| NXN        | 6.91E-13 | -0.156375283 | 0.116 | 0.183 | 1.67E-08 | 1.1 |
| SIPA1L2    | 6.99E-13 | -0.124392273 | 0.041 | 0.087 | 1.68E-08 | 1.1 |
| ORMDL2     | 7.03E-13 | -0.137839003 | 0.114 | 0.181 | 1.69E-08 | 1.1 |
| HMG20A     | 7.06E-13 | -0.124762234 | 0.028 | 0.068 | 1.70E-08 | 1.1 |
| PSMD11     | 7.07E-13 | -0.169767588 | 0.238 | 0.325 | 1.71E-08 | 1.1 |
| PTEN       | 7.10E-13 | 0.261694864  | 0.862 | 0.846 | 1.71E-08 | 1.1 |
| LRRC4C     | 7.26E-13 | -0.14958706  | 0.028 | 0.068 | 1.75E-08 | 1.1 |
| GLIPR1     | 7.36E-13 | 0.354237228  | 0.389 | 0.331 | 1.77E-08 | 1.1 |
| SUPT20H    | 7.70E-13 | -0.115156398 | 0.047 | 0.095 | 1.86E-08 | 1.1 |
| GALNT18    | 7.71E-13 | -0.18370292  | 0.024 | 0.062 | 1.86E-08 | 1.1 |
| NUDT19     | 7.71E-13 | -0.107122862 | 0.016 | 0.05  | 1.86E-08 | 1.1 |
| OSBPL10    | 7.91E-13 | -0.190632806 | 0.09  | 0.15  | 1.91E-08 | 1.1 |
| GPCPD1     | 7.98E-13 | -0.193782288 | 0.084 | 0.141 | 1.92E-08 | 1.1 |
| UFL1       | 8.09E-13 | -0.138112921 | 0.034 | 0.077 | 1.95E-08 | 1.1 |

|            |          |              |       |       |          |     |
|------------|----------|--------------|-------|-------|----------|-----|
| CMTM6      | 8.16E-13 | -0.100513073 | 0.193 | 0.281 | 1.97E-08 | 1.1 |
| RP11-347C  | 8.29E-13 | -0.112863598 | 0.01  | 0.041 | 2.00E-08 | 1.1 |
| GRIN2B     | 8.31E-13 | -0.129126243 | 0.011 | 0.042 | 2.00E-08 | 1.1 |
| MMP23B     | 8.45E-13 | -0.109508917 | 0.026 | 0.065 | 2.04E-08 | 1.1 |
| SLC26A4    | 8.51E-13 | -0.175198368 | 0.004 | 0.029 | 2.05E-08 | 1.1 |
| PCMT1      | 8.67E-13 | -0.131262484 | 0.068 | 0.123 | 2.09E-08 | 1.1 |
| STK24      | 8.70E-13 | -0.166189971 | 0.098 | 0.16  | 2.10E-08 | 1.1 |
| EPS15L1    | 8.73E-13 | -0.112957372 | 0.038 | 0.082 | 2.10E-08 | 1.1 |
| REEP3      | 8.98E-13 | -0.119451385 | 0.184 | 0.268 | 2.16E-08 | 1.1 |
| PHLPP2     | 9.08E-13 | -0.118992416 | 0.021 | 0.058 | 2.19E-08 | 1.1 |
| SUGP2      | 9.14E-13 | -0.129955219 | 0.025 | 0.064 | 2.20E-08 | 1.1 |
| TJP3       | 9.17E-13 | -0.102078331 | 0.012 | 0.044 | 2.21E-08 | 1.1 |
| ZNF736     | 9.20E-13 | -0.125406068 | 0.05  | 0.098 | 2.22E-08 | 1.1 |
| SNRPD1     | 9.60E-13 | 0.327866321  | 0.434 | 0.396 | 2.31E-08 | 1.1 |
| EIF4B      | 9.73E-13 | 0.289532266  | 0.511 | 0.476 | 2.35E-08 | 1.1 |
| CARD14     | 1.00E-12 | -0.12732217  | 0.01  | 0.041 | 2.42E-08 | 1.1 |
| DROSHA     | 1.01E-12 | -0.11788592  | 0.017 | 0.051 | 2.44E-08 | 1.1 |
| ZNF345     | 1.01E-12 | -0.112160366 | 0.026 | 0.065 | 2.45E-08 | 1.1 |
| COMMD1     | 1.03E-12 | -0.149340708 | 0.049 | 0.096 | 2.49E-08 | 1.1 |
| IER2       | 1.04E-12 | -0.171991186 | 0.035 | 0.078 | 2.52E-08 | 1.1 |
| SBNO1      | 1.05E-12 | -0.11461659  | 0.063 | 0.117 | 2.53E-08 | 1.1 |
| EXTL3      | 1.05E-12 | -0.136269582 | 0.049 | 0.097 | 2.54E-08 | 1.1 |
| NRG3       | 1.06E-12 | -0.180405801 | 0.061 | 0.112 | 2.56E-08 | 1.1 |
| RSF1       | 1.08E-12 | -0.152865168 | 0.258 | 0.348 | 2.61E-08 | 1.1 |
| TRIM22     | 1.11E-12 | -0.14677119  | 0.068 | 0.122 | 2.67E-08 | 1.1 |
| FASTKD1    | 1.15E-12 | -0.139703903 | 0.025 | 0.063 | 2.77E-08 | 1.1 |
| UBLCP1     | 1.15E-12 | -0.106420967 | 0.037 | 0.081 | 2.77E-08 | 1.1 |
| NAA50      | 1.15E-12 | 0.313468774  | 0.258 | 0.2   | 2.77E-08 | 1.1 |
| C4BPB      | 1.18E-12 | -0.111423969 | 0.02  | 0.056 | 2.84E-08 | 1.1 |
| SLX4IP     | 1.20E-12 | -0.117747968 | 0.016 | 0.049 | 2.90E-08 | 1.1 |
| RP11-230B  | 1.21E-12 | -0.102950991 | 0.01  | 0.04  | 2.92E-08 | 1.1 |
| RELA       | 1.22E-12 | -0.129796621 | 0.055 | 0.104 | 2.94E-08 | 1.1 |
| CFL1       | 1.23E-12 | -0.265798762 | 0.187 | 0.264 | 2.97E-08 | 1.1 |
| CYP3A5     | 1.25E-12 | -0.106619148 | 0.004 | 0.029 | 3.02E-08 | 1.1 |
| GLYR1      | 1.27E-12 | -0.1383706   | 0.077 | 0.133 | 3.05E-08 | 1.1 |
| BRAF       | 1.33E-12 | -0.110846726 | 0.265 | 0.363 | 3.20E-08 | 1.1 |
| CNKSR3     | 1.33E-12 | 0.217629598  | 0.554 | 0.499 | 3.21E-08 | 1.1 |
| NECAP2     | 1.34E-12 | -0.108364586 | 0.018 | 0.052 | 3.23E-08 | 1.1 |
| KCNQ1OT1   | 1.34E-12 | -0.155258901 | 0.061 | 0.113 | 3.24E-08 | 1.1 |
| RP11-294J2 | 1.34E-12 | -0.100659886 | 0.022 | 0.059 | 3.24E-08 | 1.1 |
| DLD        | 1.35E-12 | -0.149252609 | 0.09  | 0.149 | 3.26E-08 | 1.1 |
| TRNT1      | 1.41E-12 | -0.100857821 | 0.013 | 0.045 | 3.39E-08 | 1.1 |
| PSME2      | 1.42E-12 | -0.285867449 | 0.291 | 0.375 | 3.42E-08 | 1.1 |
| DIS3       | 1.44E-12 | -0.132273919 | 0.048 | 0.094 | 3.48E-08 | 1.1 |
| CALR       | 1.47E-12 | 0.301201939  | 0.23  | 0.173 | 3.53E-08 | 1.1 |
| HM13       | 1.50E-12 | -0.15325005  | 0.11  | 0.173 | 3.61E-08 | 1.1 |
| DLEU1      | 1.52E-12 | -0.169117962 | 0.112 | 0.176 | 3.66E-08 | 1.1 |

|           |          |              |       |       |          |     |
|-----------|----------|--------------|-------|-------|----------|-----|
| HAVCR2    | 1.53E-12 | -0.108501004 | 0.008 | 0.035 | 3.68E-08 | 1.1 |
| LINC00907 | 1.55E-12 | -0.110234708 | 0.007 | 0.035 | 3.74E-08 | 1.1 |
| C14orf1   | 1.56E-12 | -0.116293115 | 0.028 | 0.067 | 3.77E-08 | 1.1 |
| TMEM258   | 1.59E-12 | 0.221474077  | 0.649 | 0.624 | 3.85E-08 | 1.1 |
| TRIM4     | 1.60E-12 | -0.132797226 | 0.033 | 0.074 | 3.87E-08 | 1.1 |
| HIST1H4H  | 1.63E-12 | -0.112578288 | 0.038 | 0.082 | 3.93E-08 | 1.1 |
| RP13-188A | 1.65E-12 | -0.122502827 | 0.012 | 0.042 | 3.99E-08 | 1.1 |
| RP5-864K1 | 1.66E-12 | -0.108772954 | 0.015 | 0.048 | 4.00E-08 | 1.1 |
| ZBTB11    | 1.67E-12 | 0.182752106  | 0.089 | 0.05  | 4.03E-08 | 1.1 |
| ARPC5     | 1.68E-12 | -0.149965976 | 0.064 | 0.116 | 4.05E-08 | 1.1 |
| CARF      | 1.74E-12 | -0.105806654 | 0.011 | 0.041 | 4.20E-08 | 1.1 |
| TBCEL     | 1.76E-12 | -0.103230317 | 0.006 | 0.033 | 4.25E-08 | 1.1 |
| LEPR      | 1.79E-12 | -0.115471085 | 0.044 | 0.089 | 4.31E-08 | 1.1 |
| BCKDHB    | 1.80E-12 | -0.142527832 | 0.025 | 0.062 | 4.34E-08 | 1.1 |
| MED15     | 1.81E-12 | 0.262670205  | 0.18  | 0.127 | 4.35E-08 | 1.1 |
| PIK3R3    | 1.83E-12 | -0.105804055 | 0.012 | 0.043 | 4.42E-08 | 1.1 |
| CCNDBP1   | 1.84E-12 | -0.107180078 | 0.027 | 0.066 | 4.44E-08 | 1.1 |
| SMC5-AS1  | 1.87E-12 | -0.106291638 | 0.012 | 0.042 | 4.51E-08 | 1.1 |
| ICA1      | 1.93E-12 | -0.187787177 | 0.222 | 0.305 | 4.65E-08 | 1.1 |
| PREP      | 1.96E-12 | 0.232241844  | 0.144 | 0.095 | 4.72E-08 | 1.1 |
| FOS       | 1.97E-12 | -0.244517151 | 0.187 | 0.265 | 4.76E-08 | 1.1 |
| SPICE1    | 1.97E-12 | -0.120957617 | 0.025 | 0.062 | 4.76E-08 | 1.1 |
| NR2C1     | 1.98E-12 | -0.117229505 | 0.03  | 0.071 | 4.78E-08 | 1.1 |
| ASPH      | 1.98E-12 | -0.140084835 | 0.075 | 0.13  | 4.79E-08 | 1.1 |
| CNOT10    | 2.03E-12 | -0.116110722 | 0.03  | 0.069 | 4.90E-08 | 1.1 |
| EP400     | 2.04E-12 | -0.123677431 | 0.048 | 0.095 | 4.91E-08 | 1.1 |
| ZNF717    | 2.06E-12 | -0.100236948 | 0.012 | 0.042 | 4.97E-08 | 1.1 |
| MYOF      | 2.06E-12 | 0.315794943  | 0.542 | 0.511 | 4.98E-08 | 1.1 |
| PRDX5     | 2.12E-12 | -0.176129952 | 0.035 | 0.076 | 5.12E-08 | 1.1 |
| PIK3C2B   | 2.13E-12 | -0.13463683  | 0.014 | 0.045 | 5.14E-08 | 1.1 |
| CFAP44    | 2.15E-12 | -0.101429352 | 0.01  | 0.039 | 5.18E-08 | 1.1 |
| TUBGCP3   | 2.15E-12 | -0.100871179 | 0.008 | 0.035 | 5.18E-08 | 1.1 |
| EPHA4     | 2.16E-12 | 0.231547377  | 0.076 | 0.04  | 5.20E-08 | 1.1 |
| MOB1B     | 2.19E-12 | -0.108651537 | 0.033 | 0.075 | 5.28E-08 | 1.1 |
| RHEB      | 2.21E-12 | 0.314588562  | 0.291 | 0.236 | 5.33E-08 | 1.1 |
| ATRNL     | 2.26E-12 | -0.135598683 | 0.041 | 0.085 | 5.46E-08 | 1.1 |
| LRCH1     | 2.27E-12 | -0.180432954 | 0.283 | 0.378 | 5.46E-08 | 1.1 |
| TRMT112   | 2.27E-12 | -0.137712784 | 0.04  | 0.084 | 5.48E-08 | 1.1 |
| ARMC9     | 2.27E-12 | -0.220256692 | 0.064 | 0.116 | 5.48E-08 | 1.1 |
| GCA       | 2.29E-12 | -0.101052616 | 0.035 | 0.078 | 5.51E-08 | 1.1 |
| CTC-254B4 | 2.29E-12 | -0.102394204 | 0.009 | 0.037 | 5.52E-08 | 1.1 |
| LSM8      | 2.38E-12 | -0.121727306 | 0.203 | 0.289 | 5.74E-08 | 1.1 |
| WWP2      | 2.40E-12 | -0.124063072 | 0.029 | 0.068 | 5.79E-08 | 1.1 |
| MLF2      | 2.42E-12 | -0.132711231 | 0.031 | 0.071 | 5.83E-08 | 1.1 |
| SNRPE     | 2.43E-12 | 0.245768665  | 0.622 | 0.61  | 5.85E-08 | 1.1 |
| BLVRB     | 2.51E-12 | -0.132116644 | 0.038 | 0.081 | 6.05E-08 | 1.1 |
| SFXN1     | 2.61E-12 | -0.131023775 | 0.033 | 0.074 | 6.30E-08 | 1.1 |

|           |          |              |       |       |          |     |
|-----------|----------|--------------|-------|-------|----------|-----|
| CNOT7     | 2.63E-12 | -0.12856136  | 0.065 | 0.116 | 6.35E-08 | 1.1 |
| MIRLET7B  | 2.67E-12 | -0.149699577 | 0.013 | 0.043 | 6.43E-08 | 1.1 |
| NUBPL     | 2.70E-12 | -0.165852114 | 0.033 | 0.073 | 6.51E-08 | 1.1 |
| XIAP      | 2.71E-12 | -0.121092405 | 0.065 | 0.118 | 6.54E-08 | 1.1 |
| PYROXD1   | 2.71E-12 | -0.112255626 | 0.021 | 0.057 | 6.54E-08 | 1.1 |
| ATF2      | 2.79E-12 | 0.296527598  | 0.17  | 0.12  | 6.72E-08 | 1.1 |
| ROR1      | 2.86E-12 | -0.184432633 | 0.015 | 0.046 | 6.88E-08 | 1.1 |
| POLG2     | 2.92E-12 | 0.328252726  | 0.107 | 0.065 | 7.04E-08 | 1.1 |
| POLR3B    | 2.97E-12 | -0.108924776 | 0.007 | 0.033 | 7.17E-08 | 1.1 |
| CEP63     | 2.99E-12 | -0.135122882 | 0.049 | 0.095 | 7.22E-08 | 1.1 |
| CNOT4     | 3.03E-12 | -0.127729885 | 0.276 | 0.376 | 7.31E-08 | 1.1 |
| LGALS3    | 3.04E-12 | -0.189649299 | 0.132 | 0.199 | 7.34E-08 | 1.1 |
| GAPDH     | 3.15E-12 | -0.302405298 | 0.53  | 0.631 | 7.60E-08 | 1.1 |
| MRPL14    | 3.16E-12 | -0.122748338 | 0.078 | 0.133 | 7.61E-08 | 1.1 |
| FAM118B   | 3.19E-12 | -0.113787584 | 0.016 | 0.049 | 7.68E-08 | 1.1 |
| LINC01389 | 3.23E-12 | -0.119524375 | 0.014 | 0.046 | 7.78E-08 | 1.1 |
| RPLP2     | 3.31E-12 | -0.344832634 | 0.183 | 0.252 | 7.99E-08 | 1.1 |
| RNF34     | 3.35E-12 | -0.129266003 | 0.032 | 0.071 | 8.07E-08 | 1.1 |
| SIMC1     | 3.39E-12 | -0.107303019 | 0.017 | 0.05  | 8.18E-08 | 1.1 |
| MT-ND4L   | 3.42E-12 | 0.259560615  | 0.554 | 0.527 | 8.24E-08 | 1.1 |
| TRAFD1    | 3.47E-12 | -0.12627252  | 0.058 | 0.107 | 8.36E-08 | 1.1 |
| MAP2K1    | 3.58E-12 | -0.135902741 | 0.156 | 0.231 | 8.62E-08 | 1.1 |
| ADGRA3    | 3.58E-12 | -0.142574261 | 0.09  | 0.149 | 8.63E-08 | 1.1 |
| KLHL8     | 3.61E-12 | -0.102201476 | 0.011 | 0.04  | 8.71E-08 | 1.1 |
| HIBADH    | 3.62E-12 | -0.132694772 | 0.14  | 0.211 | 8.72E-08 | 1.1 |
| ITPR3     | 3.73E-12 | -0.141939306 | 0.023 | 0.058 | 8.99E-08 | 1.1 |
| RNASE4    | 3.74E-12 | -0.123699028 | 0.04  | 0.083 | 9.03E-08 | 1.1 |
| SZT2      | 3.77E-12 | -0.100695176 | 0.008 | 0.034 | 9.08E-08 | 1.1 |
| HIF1AN    | 3.82E-12 | -0.108840751 | 0.013 | 0.044 | 9.22E-08 | 1.1 |
| LINC00693 | 3.88E-12 | -0.110709414 | 0.007 | 0.034 | 9.36E-08 | 1.1 |
| ANGEL2    | 4.03E-12 | -0.101406056 | 0.012 | 0.042 | 9.73E-08 | 1.1 |
| SPCS3     | 4.08E-12 | -0.143065014 | 0.031 | 0.07  | 9.83E-08 | 1.1 |
| BIRC6     | 4.13E-12 | -0.125181803 | 0.475 | 0.588 | 9.97E-08 | 1.1 |
| TMEM117   | 4.20E-12 | -0.122139515 | 0.016 | 0.049 | 1.01E-07 | 1.1 |
| FAM19A2   | 4.23E-12 | 0.181591212  | 0.671 | 0.621 | 1.02E-07 | 1.1 |
| KIF1C     | 4.25E-12 | -0.114564713 | 0.017 | 0.05  | 1.02E-07 | 1.1 |
| MED6      | 4.32E-12 | -0.124802813 | 0.124 | 0.191 | 1.04E-07 | 1.1 |
| CCT3      | 4.47E-12 | -0.154400591 | 0.365 | 0.468 | 1.08E-07 | 1.1 |
| GAN       | 4.48E-12 | -0.11356437  | 0.096 | 0.157 | 1.08E-07 | 1.1 |
| GS1-124K5 | 4.59E-12 | -0.111481017 | 0.007 | 0.034 | 1.11E-07 | 1.1 |
| ZER1      | 4.61E-12 | -0.14193091  | 0.068 | 0.119 | 1.11E-07 | 1.1 |
| RCL1      | 4.84E-12 | -0.102077692 | 0.013 | 0.044 | 1.17E-07 | 1.1 |
| VPRBP     | 4.91E-12 | -0.126239681 | 0.025 | 0.061 | 1.18E-07 | 1.1 |
| KLK10     | 4.93E-12 | -0.142374459 | 0.03  | 0.07  | 1.19E-07 | 1.1 |
| SFMBT1    | 4.97E-12 | -0.119579792 | 0.02  | 0.055 | 1.20E-07 | 1.1 |
| AMD1      | 5.33E-12 | 0.372590962  | 0.281 | 0.228 | 1.29E-07 | 1.1 |
| RSL24D1   | 5.33E-12 | 0.186699162  | 0.754 | 0.742 | 1.29E-07 | 1.1 |



|           |          |              |       |       |          |     |
|-----------|----------|--------------|-------|-------|----------|-----|
| TRIM27    | 5.39E-12 | -0.112013083 | 0.057 | 0.106 | 1.30E-07 | 1.1 |
| ATAD2     | 5.43E-12 | -0.129396092 | 0.038 | 0.079 | 1.31E-07 | 1.1 |
| STAM2     | 5.44E-12 | -0.1220179   | 0.032 | 0.071 | 1.31E-07 | 1.1 |
| FBXO21    | 5.47E-12 | -0.129256026 | 0.059 | 0.109 | 1.32E-07 | 1.1 |
| HOOK3     | 5.47E-12 | -0.116218323 | 0.086 | 0.144 | 1.32E-07 | 1.1 |
| C9orf91   | 5.55E-12 | -0.104870017 | 0.012 | 0.042 | 1.34E-07 | 1.1 |
| LINC01572 | 5.57E-12 | -0.105180132 | 0.017 | 0.05  | 1.34E-07 | 1.1 |
| DEPDC5    | 5.60E-12 | -0.12177832  | 0.019 | 0.052 | 1.35E-07 | 1.1 |
| RC3H2     | 5.63E-12 | -0.131509037 | 0.064 | 0.115 | 1.36E-07 | 1.1 |
| ATP6AP1L  | 5.64E-12 | -0.101330858 | 0.01  | 0.038 | 1.36E-07 | 1.1 |
| PRKRA     | 5.65E-12 | -0.13560212  | 0.047 | 0.092 | 1.36E-07 | 1.1 |
| MAP1B     | 5.99E-12 | -0.242569137 | 0.346 | 0.431 | 1.44E-07 | 1.1 |
| ATXN7     | 6.15E-12 | -0.14681657  | 0.103 | 0.163 | 1.48E-07 | 1.1 |
| STPG2     | 6.17E-12 | -0.14604287  | 0.029 | 0.067 | 1.49E-07 | 1.1 |
| C5orf63   | 6.31E-12 | -0.100673533 | 0.013 | 0.044 | 1.52E-07 | 1.1 |
| CHM       | 6.33E-12 | -0.120101243 | 0.044 | 0.088 | 1.53E-07 | 1.1 |
| SLC26A8   | 6.42E-12 | -0.117222707 | 0.011 | 0.04  | 1.55E-07 | 1.1 |
| SIRPA     | 6.55E-12 | -0.105867691 | 0.034 | 0.075 | 1.58E-07 | 1.1 |
| NFYB      | 6.75E-12 | -0.110503383 | 0.037 | 0.078 | 1.63E-07 | 1.1 |
| MCCC1     | 6.75E-12 | -0.109019093 | 0.068 | 0.12  | 1.63E-07 | 1.1 |
| CORO2A    | 6.76E-12 | -0.114207544 | 0.016 | 0.048 | 1.63E-07 | 1.1 |
| ACER3     | 6.86E-12 | -0.127013255 | 0.029 | 0.067 | 1.65E-07 | 1.1 |
| NEK10     | 6.92E-12 | -0.169811345 | 0.08  | 0.135 | 1.67E-07 | 1.1 |
| ASXL1     | 7.03E-12 | 0.306246492  | 0.304 | 0.251 | 1.69E-07 | 1.1 |
| KIAA1143  | 7.12E-12 | -0.124146601 | 0.077 | 0.131 | 1.72E-07 | 1.1 |
| SLC6A14   | 7.21E-12 | -0.185299479 | 0.16  | 0.231 | 1.74E-07 | 1.1 |
| ABRACL    | 7.56E-12 | -0.121783745 | 0.315 | 0.411 | 1.82E-07 | 1.1 |
| ARL4C     | 7.64E-12 | 0.317378148  | 0.257 | 0.202 | 1.84E-07 | 1.1 |
| SARNP     | 7.77E-12 | 0.340952094  | 0.267 | 0.212 | 1.87E-07 | 1.1 |
| TPGS2     | 7.80E-12 | -0.10590416  | 0.027 | 0.064 | 1.88E-07 | 1.1 |
| PARG      | 7.91E-12 | -0.108287176 | 0.057 | 0.106 | 1.91E-07 | 1.1 |
| LATS2     | 7.94E-12 | 0.230226702  | 0.157 | 0.107 | 1.92E-07 | 1.1 |
| TMEM136   | 8.01E-12 | 0.150134948  | 0.06  | 0.03  | 1.93E-07 | 1.1 |
| CYTH3     | 8.29E-12 | 0.276769125  | 0.116 | 0.074 | 2.00E-07 | 1.1 |
| ANXA5     | 8.42E-12 | -0.169601597 | 0.195 | 0.271 | 2.03E-07 | 1.1 |
| CEP112    | 8.53E-12 | -0.123708645 | 0.018 | 0.051 | 2.06E-07 | 1.1 |
| L3MBTL1   | 8.69E-12 | -0.100357599 | 0.015 | 0.046 | 2.10E-07 | 1.1 |
| SPEN      | 8.70E-12 | 0.316260674  | 0.313 | 0.257 | 2.10E-07 | 1.1 |
| AAGAB     | 8.72E-12 | -0.126104746 | 0.095 | 0.153 | 2.10E-07 | 1.1 |
| YIPF1     | 8.87E-12 | -0.100967343 | 0.023 | 0.059 | 2.14E-07 | 1.1 |
| SMYD4     | 8.87E-12 | -0.114303038 | 0.01  | 0.039 | 2.14E-07 | 1.1 |
| FAM192A   | 9.00E-12 | -0.118501746 | 0.03  | 0.068 | 2.17E-07 | 1.1 |
| GIT2      | 9.01E-12 | -0.117944609 | 0.04  | 0.083 | 2.17E-07 | 1.1 |
| BFAR      | 9.05E-12 | 0.26900021   | 0.236 | 0.182 | 2.18E-07 | 1.1 |
| RP11-701H | 9.23E-12 | -0.117461577 | 0.024 | 0.059 | 2.23E-07 | 1.1 |
| C6orf132  | 9.67E-12 | -0.166984927 | 0.119 | 0.182 | 2.33E-07 | 1.1 |
| DMXL1     | 9.68E-12 | -0.151299437 | 0.081 | 0.136 | 2.33E-07 | 1.1 |

|           |          |              |       |       |          |     |
|-----------|----------|--------------|-------|-------|----------|-----|
| SHANK2    | 9.71E-12 | -0.158853968 | 0.145 | 0.215 | 2.34E-07 | 1.1 |
| ABCC3     | 9.74E-12 | -0.118386325 | 0.006 | 0.032 | 2.35E-07 | 1.1 |
| PSMB3     | 9.79E-12 | -0.102926629 | 0.04  | 0.084 | 2.36E-07 | 1.1 |
| BRK1      | 9.85E-12 | -0.179156966 | 0.622 | 0.716 | 2.38E-07 | 1.1 |
| CTNBL1    | 9.91E-12 | -0.11988625  | 0.05  | 0.096 | 2.39E-07 | 1.1 |
| CCZ1B     | 9.99E-12 | -0.104533968 | 0.02  | 0.054 | 2.41E-07 | 1.1 |
| CREBBP    | 1.00E-11 | -0.157399233 | 0.183 | 0.259 | 2.42E-07 | 1.1 |
| TBC1D19   | 1.01E-11 | -0.100845404 | 0.007 | 0.032 | 2.43E-07 | 1.1 |
| CCNG1     | 1.04E-11 | -0.12415338  | 0.083 | 0.14  | 2.50E-07 | 1.1 |
| GALNT11   | 1.04E-11 | -0.147249416 | 0.051 | 0.096 | 2.51E-07 | 1.1 |
| PHTF1     | 1.04E-11 | -0.113456175 | 0.017 | 0.049 | 2.51E-07 | 1.1 |
| MAPRE2    | 1.04E-11 | -0.153281236 | 0.095 | 0.154 | 2.52E-07 | 1.1 |
| LRP5      | 1.05E-11 | -0.112975097 | 0.017 | 0.049 | 2.54E-07 | 1.1 |
| PAX8      | 1.07E-11 | -0.117294379 | 0.01  | 0.038 | 2.57E-07 | 1.1 |
| NUP58     | 1.08E-11 | 0.222421571  | 0.141 | 0.093 | 2.61E-07 | 1.1 |
| GAS7      | 1.09E-11 | -0.132623777 | 0.027 | 0.064 | 2.63E-07 | 1.1 |
| TMEM181   | 1.11E-11 | -0.131238108 | 0.185 | 0.263 | 2.68E-07 | 1.1 |
| C16orf45  | 1.14E-11 | -0.130814909 | 0.031 | 0.07  | 2.75E-07 | 1.1 |
| NR6A1     | 1.15E-11 | -0.123638161 | 0.13  | 0.198 | 2.76E-07 | 1.1 |
| PGBD5     | 1.15E-11 | -0.133943622 | 0.048 | 0.092 | 2.78E-07 | 1.1 |
| SBNO2     | 1.15E-11 | -0.114210755 | 0.013 | 0.043 | 2.78E-07 | 1.1 |
| CCPG1     | 1.19E-11 | -0.116063477 | 0.036 | 0.076 | 2.87E-07 | 1.1 |
| NCK1      | 1.22E-11 | -0.145172418 | 0.115 | 0.177 | 2.95E-07 | 1.1 |
| LINC00869 | 1.27E-11 | -0.107545049 | 0.026 | 0.063 | 3.06E-07 | 1.1 |
| P4HA2     | 1.38E-11 | -0.132948742 | 0.043 | 0.086 | 3.32E-07 | 1.1 |
| CUL1      | 1.39E-11 | -0.136064621 | 0.071 | 0.122 | 3.34E-07 | 1.1 |
| PTRH2     | 1.42E-11 | -0.15665242  | 0.12  | 0.183 | 3.42E-07 | 1.1 |
| NGFRAP1   | 1.43E-11 | 0.145513668  | 0.068 | 0.035 | 3.45E-07 | 1.1 |
| ARPC2     | 1.48E-11 | -0.132134161 | 0.128 | 0.193 | 3.58E-07 | 1.1 |
| TMEM50A   | 1.49E-11 | -0.142504835 | 0.108 | 0.168 | 3.59E-07 | 1.1 |
| ADIPOR2   | 1.49E-11 | -0.111208012 | 0.026 | 0.063 | 3.60E-07 | 1.1 |
| FAM35A    | 1.53E-11 | -0.174674194 | 0.076 | 0.129 | 3.68E-07 | 1.1 |
| CDK8      | 1.60E-11 | -0.108209124 | 0.118 | 0.182 | 3.86E-07 | 1.1 |
| SRPK2     | 1.66E-11 | 0.35910335   | 0.406 | 0.368 | 4.00E-07 | 1.1 |
| RNF111    | 1.67E-11 | -0.109732806 | 0.18  | 0.261 | 4.02E-07 | 1.1 |
| BID       | 1.67E-11 | -0.146500669 | 0.103 | 0.163 | 4.02E-07 | 1.1 |
| GGA1      | 1.71E-11 | -0.112571063 | 0.02  | 0.053 | 4.11E-07 | 1.1 |
| CUEDC1    | 1.71E-11 | -0.114733782 | 0.028 | 0.064 | 4.12E-07 | 1.1 |
| PPP2R5C   | 1.71E-11 | -0.109938533 | 0.156 | 0.23  | 4.13E-07 | 1.1 |
| GLCE      | 1.75E-11 | -0.125258824 | 0.024 | 0.059 | 4.21E-07 | 1.1 |
| POLB      | 1.75E-11 | -0.116236535 | 0.039 | 0.08  | 4.22E-07 | 1.1 |
| NOP58     | 1.78E-11 | 0.283497744  | 0.258 | 0.203 | 4.30E-07 | 1.1 |
| C12orf57  | 1.85E-11 | -0.142088414 | 0.021 | 0.054 | 4.47E-07 | 1.1 |
| TAF11     | 1.86E-11 | -0.113426191 | 0.025 | 0.061 | 4.48E-07 | 1.1 |
| MTR       | 1.88E-11 | -0.123172944 | 0.04  | 0.081 | 4.54E-07 | 1.1 |
| ANAPC4    | 1.88E-11 | -0.101708027 | 0.007 | 0.032 | 4.54E-07 | 1.1 |
| MFSD1     | 1.89E-11 | -0.103226665 | 0.028 | 0.065 | 4.56E-07 | 1.1 |

|           |          |              |       |       |          |     |
|-----------|----------|--------------|-------|-------|----------|-----|
| KCTD9     | 1.90E-11 | 0.40426033   | 0.339 | 0.287 | 4.57E-07 | 1.1 |
| FAM120C   | 1.92E-11 | -0.129263988 | 0.028 | 0.064 | 4.62E-07 | 1.1 |
| GRAMD1C   | 1.96E-11 | -0.106549473 | 0.021 | 0.055 | 4.72E-07 | 1.1 |
| PSMD7     | 1.96E-11 | -0.133864949 | 0.106 | 0.165 | 4.73E-07 | 1.1 |
| TXNDC12   | 2.08E-11 | -0.117278715 | 0.023 | 0.058 | 5.01E-07 | 1.1 |
| NDUFS1    | 2.08E-11 | -0.104350602 | 0.088 | 0.145 | 5.02E-07 | 1.1 |
| COX19     | 2.08E-11 | -0.107726729 | 0.025 | 0.06  | 5.02E-07 | 1.1 |
| NSMCE2    | 2.16E-11 | -0.138911705 | 0.352 | 0.453 | 5.20E-07 | 1.1 |
| PRKAA2    | 2.16E-11 | -0.108146332 | 0.02  | 0.052 | 5.20E-07 | 1.1 |
| ARHGAP31  | 2.19E-11 | -0.10062471  | 0.006 | 0.03  | 5.27E-07 | 1.1 |
| DLGAP4    | 2.21E-11 | -0.142192576 | 0.073 | 0.124 | 5.33E-07 | 1.1 |
| LINC00937 | 2.22E-11 | -0.10033749  | 0.01  | 0.037 | 5.36E-07 | 1.1 |
| SAMD12-A  | 2.28E-11 | -0.106645494 | 0.011 | 0.039 | 5.49E-07 | 1.1 |
| EPG5      | 2.28E-11 | -0.140715925 | 0.056 | 0.103 | 5.50E-07 | 1.1 |
| MAPK8     | 2.35E-11 | -0.117190582 | 0.162 | 0.235 | 5.66E-07 | 1.1 |
| EPM2AIP1  | 2.44E-11 | -0.119181599 | 0.03  | 0.068 | 5.89E-07 | 1.1 |
| RGS12     | 2.46E-11 | -0.121197692 | 0.011 | 0.039 | 5.92E-07 | 1.1 |
| CAPNS1    | 2.46E-11 | -0.164876253 | 0.035 | 0.074 | 5.94E-07 | 1.1 |
| KIAA0430  | 2.47E-11 | -0.123290478 | 0.042 | 0.084 | 5.96E-07 | 1.1 |
| C9orf3    | 2.48E-11 | -0.200806914 | 0.122 | 0.184 | 5.98E-07 | 1.1 |
| TMEM132A  | 2.51E-11 | -0.102208171 | 0.004 | 0.026 | 6.06E-07 | 1.1 |
| C3orf35   | 2.53E-11 | -0.116102747 | 0.02  | 0.052 | 6.10E-07 | 1.1 |
| COG6      | 2.53E-11 | -0.106318786 | 0.011 | 0.039 | 6.11E-07 | 1.1 |
| MRPS31    | 2.55E-11 | -0.108850873 | 0.078 | 0.131 | 6.16E-07 | 1.1 |
| FGF13     | 2.59E-11 | -0.164309859 | 0.166 | 0.236 | 6.23E-07 | 1.1 |
| RP11-317G | 2.61E-11 | 0.181313375  | 0.076 | 0.042 | 6.29E-07 | 1.1 |
| KCNH8     | 2.62E-11 | -0.126264908 | 0.018 | 0.05  | 6.31E-07 | 1.1 |
| CTA-292E1 | 2.63E-11 | -0.160806103 | 0.074 | 0.125 | 6.35E-07 | 1.1 |
| SHFM1     | 2.64E-11 | -0.15933874  | 0.552 | 0.656 | 6.36E-07 | 1.1 |
| ZDHHC17   | 2.65E-11 | -0.144955272 | 0.06  | 0.107 | 6.39E-07 | 1.1 |
| MUC15     | 2.66E-11 | -0.104743777 | 0.023 | 0.057 | 6.42E-07 | 1.1 |
| TFAP2A    | 2.67E-11 | -0.126718677 | 0.038 | 0.078 | 6.43E-07 | 1.1 |
| WDR37     | 2.69E-11 | -0.115532316 | 0.053 | 0.099 | 6.48E-07 | 1.1 |
| AMBRA1    | 2.71E-11 | 0.178562957  | 0.737 | 0.729 | 6.53E-07 | 1.1 |
| PIKFYVE   | 2.71E-11 | -0.10937375  | 0.065 | 0.114 | 6.53E-07 | 1.1 |
| CTC-444N2 | 2.72E-11 | -0.117278686 | 0.05  | 0.095 | 6.56E-07 | 1.1 |
| ATP5EP2   | 2.74E-11 | -0.142400488 | 0.154 | 0.224 | 6.62E-07 | 1.1 |
| CSPP1     | 2.75E-11 | -0.136828466 | 0.086 | 0.141 | 6.63E-07 | 1.1 |
| PIGF      | 2.76E-11 | -0.11513379  | 0.074 | 0.126 | 6.66E-07 | 1.1 |
| SMAGP     | 2.82E-11 | -0.113472678 | 0.03  | 0.067 | 6.80E-07 | 1.1 |
| CARNMT1   | 2.85E-11 | -0.113472309 | 0.027 | 0.062 | 6.87E-07 | 1.1 |
| DYNC2LI1  | 2.90E-11 | 0.21360039   | 0.125 | 0.082 | 6.99E-07 | 1.1 |
| GPRIN3    | 2.99E-11 | -0.103370214 | 0.011 | 0.039 | 7.20E-07 | 1.1 |
| IL13RA1   | 3.03E-11 | -0.106073638 | 0.023 | 0.056 | 7.31E-07 | 1.1 |
| SLC38A2   | 3.07E-11 | -0.148706757 | 0.13  | 0.193 | 7.40E-07 | 1.1 |
| GBP2      | 3.11E-11 | 0.296493785  | 0.75  | 0.756 | 7.49E-07 | 1.1 |
| CCDC109B  | 3.15E-11 | -0.125662023 | 0.033 | 0.071 | 7.59E-07 | 1.1 |

|           |          |              |       |       |          |     |
|-----------|----------|--------------|-------|-------|----------|-----|
| MAGT1     | 3.16E-11 | 0.268480718  | 0.218 | 0.165 | 7.62E-07 | 1.1 |
| RP11-420A | 3.22E-11 | -0.109756231 | 0.013 | 0.041 | 7.77E-07 | 1.1 |
| VTA1      | 3.34E-11 | -0.106745823 | 0.056 | 0.103 | 8.05E-07 | 1.1 |
| PTK2      | 3.38E-11 | -0.108517009 | 0.474 | 0.597 | 8.15E-07 | 1.1 |
| MTOR      | 3.41E-11 | -0.106917961 | 0.026 | 0.061 | 8.22E-07 | 1.1 |
| TCP11L2   | 3.41E-11 | -0.100839681 | 0.033 | 0.071 | 8.23E-07 | 1.1 |
| C6orf89   | 3.45E-11 | -0.111861342 | 0.048 | 0.092 | 8.32E-07 | 1.1 |
| AGPAT5    | 3.47E-11 | -0.114495653 | 0.021 | 0.054 | 8.36E-07 | 1.1 |
| SSR1      | 3.47E-11 | -0.122156911 | 0.131 | 0.196 | 8.38E-07 | 1.1 |
| PTPN6     | 3.48E-11 | -0.104662074 | 0.022 | 0.055 | 8.40E-07 | 1.1 |
| SOCS7     | 3.49E-11 | -0.119596799 | 0.018 | 0.049 | 8.41E-07 | 1.1 |
| MIDN      | 3.54E-11 | -0.127993082 | 0.023 | 0.057 | 8.55E-07 | 1.1 |
| RP11-66B2 | 3.57E-11 | -0.114386069 | 0.019 | 0.05  | 8.61E-07 | 1.1 |
| HIST1H2BG | 3.62E-11 | -0.108635019 | 0.07  | 0.121 | 8.73E-07 | 1.1 |
| WTAP      | 3.63E-11 | 0.562911347  | 0.66  | 0.665 | 8.74E-07 | 1.1 |
| KANSL2    | 3.70E-11 | -0.110920523 | 0.023 | 0.057 | 8.93E-07 | 1.1 |
| NT5DC1    | 3.77E-11 | -0.13711388  | 0.041 | 0.082 | 9.09E-07 | 1.1 |
| DAP       | 3.90E-11 | -0.118503418 | 0.046 | 0.089 | 9.39E-07 | 1.1 |
| HKR1      | 3.96E-11 | -0.102772988 | 0.032 | 0.069 | 9.55E-07 | 1.1 |
| SAMD8     | 4.07E-11 | -0.108900761 | 0.041 | 0.082 | 9.81E-07 | 1.1 |
| MAP4K5    | 4.14E-11 | 0.411316898  | 0.391 | 0.355 | 9.97E-07 | 1.1 |
| TLE2      | 4.17E-11 | -0.112966559 | 0.028 | 0.064 | 1.01E-06 | 1.1 |
| KMT2A     | 4.20E-11 | 0.266158523  | 0.433 | 0.39  | 1.01E-06 | 1.1 |
| EXOSC1    | 4.21E-11 | -0.110199267 | 0.026 | 0.061 | 1.01E-06 | 1.1 |
| TM9SF4    | 4.52E-11 | -0.134153507 | 0.07  | 0.12  | 1.09E-06 | 1.1 |
| ZNF121    | 4.55E-11 | -0.135402631 | 0.055 | 0.1   | 1.10E-06 | 1.1 |
| VPS13A    | 4.58E-11 | -0.109540326 | 0.076 | 0.129 | 1.10E-06 | 1.1 |
| MED28     | 4.60E-11 | -0.124908861 | 0.07  | 0.12  | 1.11E-06 | 1.1 |
| RPLP1     | 4.72E-11 | -0.389591081 | 0.218 | 0.286 | 1.14E-06 | 1.1 |
| TTI2      | 4.77E-11 | -0.107521714 | 0.029 | 0.065 | 1.15E-06 | 1.1 |
| DGCR2     | 4.79E-11 | -0.100404722 | 0.018 | 0.05  | 1.16E-06 | 1.1 |
| PIR       | 4.84E-11 | -0.100075277 | 0.01  | 0.037 | 1.17E-06 | 1.1 |
| DCP2      | 4.85E-11 | -0.13957447  | 0.061 | 0.108 | 1.17E-06 | 1.1 |
| SREK1IP1  | 4.90E-11 | -0.111514755 | 0.108 | 0.167 | 1.18E-06 | 1.1 |
| EIF5B     | 5.02E-11 | -0.132311206 | 0.17  | 0.241 | 1.21E-06 | 1.1 |
| ZNF217    | 5.13E-11 | -0.129116595 | 0.101 | 0.159 | 1.24E-06 | 1.1 |
| PDCD6IP   | 5.23E-11 | -0.129011968 | 0.1   | 0.157 | 1.26E-06 | 1.1 |
| PTK7      | 5.26E-11 | -0.125933808 | 0.058 | 0.104 | 1.27E-06 | 1.1 |
| PISD      | 5.32E-11 | 0.292296926  | 0.214 | 0.163 | 1.28E-06 | 1.1 |
| ZNF136    | 5.35E-11 | -0.103801613 | 0.026 | 0.061 | 1.29E-06 | 1.1 |
| TAF4B     | 5.41E-11 | -0.106718537 | 0.038 | 0.078 | 1.31E-06 | 1.1 |
| EXOSC6    | 5.43E-11 | -0.101192659 | 0.01  | 0.037 | 1.31E-06 | 1.1 |
| NFE2L1    | 5.54E-11 | -0.122298951 | 0.033 | 0.07  | 1.33E-06 | 1.1 |
| PDZD8     | 5.63E-11 | -0.141134406 | 0.064 | 0.111 | 1.36E-06 | 1.1 |
| LRIG3     | 5.76E-11 | -0.117202205 | 0.03  | 0.066 | 1.39E-06 | 1.1 |
| GTDC1     | 5.81E-11 | -0.11125103  | 0.033 | 0.07  | 1.40E-06 | 1.1 |
| PTGFRN    | 5.82E-11 | -0.138044099 | 0.082 | 0.135 | 1.40E-06 | 1.1 |

|           |          |              |       |       |          |     |
|-----------|----------|--------------|-------|-------|----------|-----|
| HLA-B     | 5.87E-11 | -0.202420906 | 0.566 | 0.663 | 1.41E-06 | 1.1 |
| PMS1      | 5.87E-11 | -0.117431601 | 0.024 | 0.057 | 1.42E-06 | 1.1 |
| IFT22     | 5.94E-11 | 0.117880974  | 0.06  | 0.03  | 1.43E-06 | 1.1 |
| NIT2      | 6.13E-11 | 0.234818049  | 0.135 | 0.092 | 1.48E-06 | 1.1 |
| SPATA6L   | 6.22E-11 | -0.103944875 | 0.015 | 0.045 | 1.50E-06 | 1.1 |
| SETDB1    | 6.36E-11 | -0.121979595 | 0.054 | 0.099 | 1.53E-06 | 1.1 |
| CCT7      | 6.43E-11 | -0.127786076 | 0.015 | 0.044 | 1.55E-06 | 1.1 |
| PRPF4B    | 6.43E-11 | -0.122823262 | 0.144 | 0.211 | 1.55E-06 | 1.1 |
| STAG2     | 6.62E-11 | -0.145315291 | 0.305 | 0.396 | 1.60E-06 | 1.1 |
| CCDC92    | 6.69E-11 | -0.10627008  | 0.015 | 0.045 | 1.61E-06 | 1.1 |
| PLAA      | 6.71E-11 | -0.132581916 | 0.039 | 0.078 | 1.62E-06 | 1.1 |
| AC072062. | 6.75E-11 | 0.250262539  | 0.548 | 0.513 | 1.63E-06 | 1.1 |
| MFI2      | 6.79E-11 | -0.108268777 | 0.009 | 0.034 | 1.64E-06 | 1.1 |
| EGF       | 6.80E-11 | -0.129141106 | 0.048 | 0.09  | 1.64E-06 | 1.1 |
| PPP2R4    | 6.86E-11 | -0.100275721 | 0.008 | 0.033 | 1.65E-06 | 1.1 |
| NPLOC4    | 6.88E-11 | -0.134390158 | 0.087 | 0.141 | 1.66E-06 | 1.1 |
| RARS2     | 6.97E-11 | -0.11669301  | 0.068 | 0.117 | 1.68E-06 | 1.1 |
| PI4KA     | 6.98E-11 | -0.141323409 | 0.059 | 0.105 | 1.68E-06 | 1.1 |
| SPATS2    | 7.04E-11 | -0.13455389  | 0.073 | 0.123 | 1.70E-06 | 1.1 |
| BUB3      | 7.05E-11 | -0.122971288 | 0.035 | 0.072 | 1.70E-06 | 1.1 |
| ZNF280D   | 7.10E-11 | -0.104165349 | 0.068 | 0.116 | 1.71E-06 | 1.1 |
| TMEM106/  | 7.32E-11 | -0.113477261 | 0.02  | 0.052 | 1.76E-06 | 1.1 |
| HAX1      | 7.33E-11 | -0.11551025  | 0.267 | 0.356 | 1.77E-06 | 1.1 |
| GRAMD1A   | 7.47E-11 | -0.131917709 | 0.017 | 0.047 | 1.80E-06 | 1.1 |
| IPO11     | 7.57E-11 | -0.114950927 | 0.017 | 0.047 | 1.83E-06 | 1.1 |
| BRCC3     | 7.59E-11 | -0.127575262 | 0.041 | 0.081 | 1.83E-06 | 1.1 |
| KIF16B    | 7.75E-11 | -0.1257957   | 0.053 | 0.097 | 1.87E-06 | 1.1 |
| BCAS3     | 8.00E-11 | 0.188365557  | 0.824 | 0.847 | 1.93E-06 | 1.1 |
| CDC123    | 8.09E-11 | -0.106969869 | 0.021 | 0.053 | 1.95E-06 | 1.1 |
| SOAT1     | 8.46E-11 | -0.10808254  | 0.032 | 0.069 | 2.04E-06 | 1.1 |
| AREG      | 8.66E-11 | 0.290528987  | 0.13  | 0.087 | 2.09E-06 | 1.1 |
| FGFR2     | 8.66E-11 | -0.129916392 | 0.018 | 0.048 | 2.09E-06 | 1.1 |
| ELF5      | 8.67E-11 | 0.327586396  | 0.336 | 0.285 | 2.09E-06 | 1.1 |
| GALK2     | 9.13E-11 | -0.102663241 | 0.046 | 0.088 | 2.20E-06 | 1.1 |
| CDK5RAP1  | 9.34E-11 | -0.10622162  | 0.023 | 0.055 | 2.25E-06 | 1.1 |
| GTF2A2    | 9.52E-11 | -0.124204142 | 0.057 | 0.101 | 2.30E-06 | 1.1 |
| KLHDC2    | 9.66E-11 | -0.106372199 | 0.029 | 0.065 | 2.33E-06 | 1.1 |
| CLNS1A    | 1.01E-10 | -0.120665771 | 0.057 | 0.102 | 2.43E-06 | 1.1 |
| BLZF1     | 1.01E-10 | -0.121319781 | 0.058 | 0.104 | 2.43E-06 | 1.1 |
| H2AFY     | 1.05E-10 | -0.137888116 | 0.097 | 0.152 | 2.54E-06 | 1.1 |
| KDM6A     | 1.06E-10 | 0.27948393   | 0.356 | 0.305 | 2.55E-06 | 1.1 |
| HEBP2     | 1.06E-10 | -0.126738531 | 0.129 | 0.192 | 2.56E-06 | 1.1 |
| ZDHHC14   | 1.07E-10 | -0.117829677 | 0.067 | 0.116 | 2.57E-06 | 1.1 |
| FPGS      | 1.07E-10 | -0.110464493 | 0.018 | 0.048 | 2.59E-06 | 1.1 |
| CD81      | 1.09E-10 | -0.131758643 | 0.014 | 0.042 | 2.63E-06 | 1.1 |
| SFPQ      | 1.14E-10 | -0.146885226 | 0.168 | 0.238 | 2.74E-06 | 1.1 |
| SCP2      | 1.15E-10 | 0.290778502  | 0.267 | 0.217 | 2.76E-06 | 1.1 |

|           |          |              |       |       |          |     |
|-----------|----------|--------------|-------|-------|----------|-----|
| SORT1     | 1.20E-10 | -0.109427169 | 0.046 | 0.087 | 2.89E-06 | 1.1 |
| RP11-16D2 | 1.20E-10 | -0.101326423 | 0.005 | 0.027 | 2.89E-06 | 1.1 |
| CDC14A    | 1.20E-10 | -0.131582541 | 0.038 | 0.077 | 2.90E-06 | 1.1 |
| SRP54     | 1.21E-10 | -0.104262167 | 0.217 | 0.298 | 2.91E-06 | 1.1 |
| APPL1     | 1.23E-10 | -0.103189714 | 0.048 | 0.091 | 2.97E-06 | 1.1 |
| TRIM5     | 1.24E-10 | -0.168602426 | 0.106 | 0.163 | 2.99E-06 | 1.1 |
| COX20     | 1.26E-10 | -0.111574711 | 0.075 | 0.125 | 3.04E-06 | 1.1 |
| RNF38     | 1.26E-10 | -0.141379222 | 0.172 | 0.243 | 3.04E-06 | 1.1 |
| CROCC     | 1.29E-10 | 0.203783956  | 0.1   | 0.062 | 3.11E-06 | 1.1 |
| ARID4A    | 1.31E-10 | 0.240464593  | 0.21  | 0.16  | 3.17E-06 | 1.1 |
| TRAP1     | 1.35E-10 | -0.125739191 | 0.023 | 0.055 | 3.26E-06 | 1.1 |
| LASP1     | 1.42E-10 | -0.11887398  | 0.042 | 0.082 | 3.42E-06 | 1.1 |
| NARS      | 1.44E-10 | -0.141956067 | 0.23  | 0.311 | 3.48E-06 | 1.1 |
| KIFAP3    | 1.46E-10 | -0.104194974 | 0.029 | 0.064 | 3.53E-06 | 1.1 |
| GK        | 1.49E-10 | -0.108438033 | 0.026 | 0.06  | 3.59E-06 | 1.1 |
| SQSTM1    | 1.50E-10 | 0.297387305  | 0.321 | 0.267 | 3.61E-06 | 1.1 |
| BDNF-AS   | 1.51E-10 | 0.299719873  | 0.667 | 0.68  | 3.65E-06 | 1.1 |
| NDFIP1    | 1.58E-10 | -0.110911352 | 0.113 | 0.172 | 3.81E-06 | 1.1 |
| OLFM4     | 1.61E-10 | -0.27297449  | 0.018 | 0.048 | 3.87E-06 | 1.1 |
| WBP11     | 1.62E-10 | 0.248276678  | 0.162 | 0.116 | 3.91E-06 | 1.1 |
| RPS10-NUC | 1.62E-10 | 0.159449146  | 0.046 | 0.021 | 3.92E-06 | 1.1 |
| NFATC1    | 1.63E-10 | -0.115657499 | 0.015 | 0.043 | 3.92E-06 | 1.1 |
| SGCZ      | 1.64E-10 | -0.248738378 | 0.054 | 0.097 | 3.96E-06 | 1.1 |
| RHOC      | 1.65E-10 | -0.1344038   | 0.029 | 0.064 | 3.98E-06 | 1.1 |
| PAFAH1B1  | 1.66E-10 | 0.34483098   | 0.396 | 0.359 | 3.99E-06 | 1.1 |
| SNRPF     | 1.66E-10 | 0.287551528  | 0.285 | 0.236 | 3.99E-06 | 1.1 |
| SPP1      | 1.66E-10 | -0.410318498 | 0.005 | 0.027 | 4.00E-06 | 1.1 |
| THOC1     | 1.67E-10 | -0.152025482 | 0.068 | 0.114 | 4.02E-06 | 1.1 |
| IL1R1     | 1.68E-10 | -0.112197826 | 0.017 | 0.046 | 4.06E-06 | 1.1 |
| PSMA7     | 1.70E-10 | -0.122133214 | 0.138 | 0.201 | 4.11E-06 | 1.1 |
| AGTPBP1   | 1.71E-10 | -0.139731469 | 0.051 | 0.094 | 4.12E-06 | 1.1 |
| PSMB8     | 1.71E-10 | -0.121606703 | 0.077 | 0.127 | 4.13E-06 | 1.1 |
| XPO6      | 1.72E-10 | -0.121243397 | 0.042 | 0.081 | 4.16E-06 | 1.1 |
| DNTTIP1   | 1.81E-10 | -0.116763629 | 0.041 | 0.08  | 4.36E-06 | 1.1 |
| MAPK1IP1  | 1.81E-10 | -0.121853281 | 0.153 | 0.219 | 4.36E-06 | 1.1 |
| DNAJC10   | 1.82E-10 | -0.111797213 | 0.029 | 0.063 | 4.39E-06 | 1.1 |
| GATAD2A   | 1.83E-10 | -0.13073197  | 0.068 | 0.116 | 4.41E-06 | 1.1 |
| RNGTT     | 1.89E-10 | -0.10148774  | 0.035 | 0.072 | 4.55E-06 | 1.1 |
| ITGAV     | 1.93E-10 | -0.109445113 | 0.114 | 0.174 | 4.66E-06 | 1.1 |
| AGK       | 2.00E-10 | -0.102017588 | 0.018 | 0.048 | 4.83E-06 | 1.1 |
| ABHD2     | 2.05E-10 | 0.21029637   | 0.132 | 0.089 | 4.94E-06 | 1.1 |
| SUN2      | 2.05E-10 | -0.112232076 | 0.015 | 0.043 | 4.95E-06 | 1.1 |
| S100P     | 2.06E-10 | -0.141241191 | 0.013 | 0.04  | 4.97E-06 | 1.1 |
| RALGDS    | 2.07E-10 | -0.125892565 | 0.044 | 0.084 | 4.99E-06 | 1.1 |
| BCAR3     | 2.10E-10 | -0.103683354 | 0.059 | 0.105 | 5.06E-06 | 1.1 |
| RGS6      | 2.14E-10 | -0.199253616 | 0.105 | 0.16  | 5.17E-06 | 1.1 |
| SNRPB2    | 2.20E-10 | -0.123520544 | 0.378 | 0.476 | 5.31E-06 | 1.1 |

|           |          |              |       |       |          |     |
|-----------|----------|--------------|-------|-------|----------|-----|
| CREBL2    | 2.27E-10 | -0.110721018 | 0.034 | 0.071 | 5.48E-06 | 1.1 |
| KAT8      | 2.36E-10 | -0.10467676  | 0.035 | 0.072 | 5.69E-06 | 1.1 |
| FAM129B   | 2.37E-10 | -0.15585606  | 0.074 | 0.122 | 5.72E-06 | 1.1 |
| MBNL1     | 2.40E-10 | -0.115973515 | 0.354 | 0.451 | 5.79E-06 | 1.1 |
| PALMD     | 2.42E-10 | 0.109925371  | 0.05  | 0.024 | 5.83E-06 | 1.1 |
| ITM2B     | 2.47E-10 | -0.123623214 | 0.198 | 0.274 | 5.94E-06 | 1.1 |
| PEX14     | 2.51E-10 | -0.125293821 | 0.068 | 0.115 | 6.05E-06 | 1.1 |
| DIAPH1    | 2.58E-10 | -0.108714785 | 0.163 | 0.231 | 6.21E-06 | 1.1 |
| DPP10     | 2.64E-10 | -0.143956296 | 0.026 | 0.059 | 6.36E-06 | 1.1 |
| RAD18     | 2.69E-10 | -0.103340635 | 0.027 | 0.061 | 6.48E-06 | 1.1 |
| WHSC1L1   | 2.75E-10 | -0.148130791 | 0.145 | 0.207 | 6.64E-06 | 1.1 |
| PLPP1     | 2.76E-10 | -0.106924158 | 0.045 | 0.086 | 6.66E-06 | 1.1 |
| PRRC2B    | 2.77E-10 | -0.174829201 | 0.169 | 0.236 | 6.67E-06 | 1.1 |
| SUFU      | 2.77E-10 | -0.126625061 | 0.025 | 0.057 | 6.68E-06 | 1.1 |
| MFF       | 2.81E-10 | -0.107520216 | 0.055 | 0.098 | 6.79E-06 | 1.1 |
| RNF7      | 2.85E-10 | -0.116206485 | 0.035 | 0.071 | 6.86E-06 | 1.1 |
| NEB       | 2.86E-10 | -0.100267383 | 0.011 | 0.037 | 6.90E-06 | 1.1 |
| EGLN1     | 2.87E-10 | 0.182229954  | 0.126 | 0.084 | 6.91E-06 | 1.1 |
| APBA2     | 2.95E-10 | -0.106034221 | 0.032 | 0.068 | 7.10E-06 | 1.1 |
| ADGRV1    | 2.97E-10 | -0.137438128 | 0.094 | 0.147 | 7.17E-06 | 1.1 |
| FEM1C     | 2.97E-10 | 0.185825269  | 0.073 | 0.041 | 7.17E-06 | 1.1 |
| AC073283. | 3.01E-10 | -0.145969887 | 0.078 | 0.127 | 7.25E-06 | 1.1 |
| TRAPPC8   | 3.07E-10 | -0.101153989 | 0.06  | 0.105 | 7.41E-06 | 1.1 |
| RAP1A     | 3.09E-10 | -0.122281237 | 0.163 | 0.229 | 7.44E-06 | 1.1 |
| RHOU      | 3.21E-10 | -0.101312736 | 0.018 | 0.047 | 7.73E-06 | 1.1 |
| FAM53C    | 3.27E-10 | 0.288580132  | 0.249 | 0.198 | 7.88E-06 | 1.1 |
| GALNT7    | 3.29E-10 | -0.109967778 | 0.063 | 0.109 | 7.93E-06 | 1.1 |
| SRSF7     | 3.36E-10 | -0.140427158 | 0.228 | 0.307 | 8.11E-06 | 1.1 |
| CYLD      | 3.42E-10 | 0.334692594  | 0.28  | 0.228 | 8.24E-06 | 1.1 |
| PLA2G4C   | 3.45E-10 | -0.113760343 | 0.032 | 0.067 | 8.32E-06 | 1.1 |
| H3F3B     | 3.58E-10 | -0.213974232 | 0.331 | 0.421 | 8.63E-06 | 1.1 |
| RP11-428O | 3.59E-10 | -0.100493257 | 0.009 | 0.033 | 8.66E-06 | 1.1 |
| DMGDH     | 3.61E-10 | -0.109583456 | 0.018 | 0.048 | 8.71E-06 | 1.1 |
| ARMCX4    | 3.62E-10 | -0.100069027 | 0.012 | 0.037 | 8.73E-06 | 1.1 |
| SOX4      | 3.63E-10 | 0.321163464  | 0.751 | 0.735 | 8.74E-06 | 1.1 |
| PIAS1     | 3.65E-10 | 0.324493338  | 0.445 | 0.413 | 8.79E-06 | 1.1 |
| CADM1     | 3.70E-10 | -0.150823284 | 0.055 | 0.098 | 8.92E-06 | 1.1 |
| POLA1     | 3.75E-10 | -0.100122514 | 0.024 | 0.056 | 9.04E-06 | 1.1 |
| MRAS      | 3.78E-10 | -0.113494201 | 0.046 | 0.086 | 9.11E-06 | 1.1 |
| ERGIC1    | 3.78E-10 | -0.110115597 | 0.063 | 0.108 | 9.12E-06 | 1.1 |
| KANK1     | 3.79E-10 | -0.149341374 | 0.169 | 0.236 | 9.14E-06 | 1.1 |
| XYLT1     | 3.89E-10 | -0.125981682 | 0.08  | 0.129 | 9.37E-06 | 1.1 |
| GOLPH3L   | 3.93E-10 | -0.115491497 | 0.161 | 0.228 | 9.47E-06 | 1.1 |
| SH3BP5    | 3.93E-10 | 0.196127056  | 0.129 | 0.087 | 9.48E-06 | 1.1 |
| PFKFB4    | 3.98E-10 | 0.177851627  | 0.06  | 0.032 | 9.61E-06 | 1.1 |
| SLC16A13  | 4.00E-10 | 0.468437022  | 0.076 | 0.044 | 9.63E-06 | 1.1 |
| FMO4      | 4.17E-10 | -0.101062705 | 0.02  | 0.05  | 1.01E-05 | 1.1 |

|            |          |              |       |       |          |     |
|------------|----------|--------------|-------|-------|----------|-----|
| CAV1       | 4.19E-10 | -0.143612124 | 0.034 | 0.07  | 1.01E-05 | 1.1 |
| RCN1       | 4.24E-10 | -0.136632154 | 0.059 | 0.102 | 1.02E-05 | 1.1 |
| FAM174B    | 4.26E-10 | -0.116042454 | 0.032 | 0.067 | 1.03E-05 | 1.1 |
| SDHC       | 4.28E-10 | -0.107054266 | 0.108 | 0.165 | 1.03E-05 | 1.1 |
| NCBP2      | 4.51E-10 | -0.102789204 | 0.066 | 0.112 | 1.09E-05 | 1.1 |
| GABARAP    | 4.55E-10 | 0.381862821  | 0.334 | 0.294 | 1.10E-05 | 1.1 |
| NCMAP      | 4.81E-10 | -0.11467457  | 0.058 | 0.101 | 1.16E-05 | 1.1 |
| CACUL1     | 4.85E-10 | 0.308043393  | 0.426 | 0.392 | 1.17E-05 | 1.1 |
| RPS16      | 4.88E-10 | -0.3057218   | 0.302 | 0.377 | 1.18E-05 | 1.1 |
| CPNE4      | 5.01E-10 | -0.153592158 | 0.023 | 0.053 | 1.21E-05 | 1.1 |
| ZNF512     | 5.12E-10 | -0.120906652 | 0.043 | 0.082 | 1.23E-05 | 1.1 |
| ATF1       | 5.39E-10 | -0.113346639 | 0.065 | 0.11  | 1.30E-05 | 1.1 |
| EPN2       | 5.52E-10 | -0.115710624 | 0.094 | 0.147 | 1.33E-05 | 1.1 |
| PTPRF      | 5.67E-10 | -0.11654515  | 0.058 | 0.102 | 1.37E-05 | 1.1 |
| IMMP1L     | 5.77E-10 | -0.108551569 | 0.051 | 0.093 | 1.39E-05 | 1.1 |
| AKAP12     | 6.00E-10 | 0.212771433  | 0.058 | 0.03  | 1.45E-05 | 1.1 |
| BTBD3      | 6.00E-10 | -0.127575575 | 0.076 | 0.124 | 1.45E-05 | 1.1 |
| ANKRD33B   | 6.13E-10 | 0.189053123  | 0.08  | 0.047 | 1.48E-05 | 1.1 |
| ROBO1      | 6.16E-10 | -0.1271536   | 0.046 | 0.086 | 1.48E-05 | 1.1 |
| HBS1L      | 6.18E-10 | 0.278048866  | 0.231 | 0.183 | 1.49E-05 | 1.1 |
| UBASH3B    | 6.51E-10 | -0.135786407 | 0.037 | 0.073 | 1.57E-05 | 1.1 |
| DNM3       | 6.55E-10 | -0.100019284 | 0.015 | 0.042 | 1.58E-05 | 1.1 |
| 11-Sep     | 6.64E-10 | -0.135757196 | 0.083 | 0.132 | 1.60E-05 | 1.1 |
| CTB-91J4.1 | 6.72E-10 | -0.118809383 | 0     | 0.017 | 1.62E-05 | 1.1 |
| BCL2L11    | 6.90E-10 | -0.11061083  | 0.032 | 0.066 | 1.66E-05 | 1.1 |
| UBE3A      | 6.93E-10 | 0.328731704  | 0.357 | 0.315 | 1.67E-05 | 1.1 |
| FZD6       | 6.99E-10 | -0.105726239 | 0.029 | 0.062 | 1.69E-05 | 1.1 |
| CCDC14     | 7.59E-10 | -0.122001549 | 0.103 | 0.156 | 1.83E-05 | 1.1 |
| ZNF432     | 7.62E-10 | -0.100841852 | 0.018 | 0.046 | 1.84E-05 | 1.1 |
| PLSCR4     | 8.02E-10 | -0.12167587  | 0.051 | 0.091 | 1.93E-05 | 1.1 |
| C18orf8    | 8.43E-10 | -0.111888907 | 0.041 | 0.078 | 2.03E-05 | 1.1 |
| PCGF3      | 8.47E-10 | -0.111966739 | 0.041 | 0.079 | 2.04E-05 | 1.1 |
| TMEM87A    | 8.51E-10 | -0.115512758 | 0.298 | 0.385 | 2.05E-05 | 1.1 |
| CAPN2      | 8.59E-10 | -0.151884535 | 0.241 | 0.318 | 2.07E-05 | 1.1 |
| PPP2R2D    | 8.83E-10 | 0.237340155  | 0.159 | 0.114 | 2.13E-05 | 1.1 |
| PPIP5K1    | 9.16E-10 | -0.104592168 | 0.023 | 0.054 | 2.21E-05 | 1.1 |
| PRR13      | 9.33E-10 | -0.120113777 | 0.057 | 0.098 | 2.25E-05 | 1.1 |
| RBPMS      | 9.58E-10 | -0.110635997 | 0.715 | 0.816 | 2.31E-05 | 1.1 |
| RP11-241G  | 9.65E-10 | 0.135716868  | 0.063 | 0.035 | 2.33E-05 | 1.1 |
| ACP1       | 9.77E-10 | -0.127119074 | 0.338 | 0.428 | 2.35E-05 | 1.1 |
| ZNHIT3     | 1.00E-09 | -0.103799193 | 0.16  | 0.226 | 2.42E-05 | 1.1 |
| HDAC5      | 1.01E-09 | 0.140653652  | 0.059 | 0.032 | 2.43E-05 | 1.1 |
| SAP30BP    | 1.04E-09 | -0.108055827 | 0.044 | 0.082 | 2.51E-05 | 1.1 |
| SIN3A      | 1.05E-09 | -0.110425503 | 0.063 | 0.106 | 2.53E-05 | 1.1 |
| PKIG       | 1.06E-09 | 0.166182098  | 0.082 | 0.049 | 2.55E-05 | 1.1 |
| AC097724.  | 1.09E-09 | -0.102180708 | 0.055 | 0.097 | 2.62E-05 | 1.1 |
| FOXP2      | 1.10E-09 | -0.100818193 | 0.013 | 0.038 | 2.65E-05 | 1.1 |



|           |          |              |       |       |          |     |
|-----------|----------|--------------|-------|-------|----------|-----|
| MANF      | 1.17E-09 | 0.140600071  | 0.061 | 0.033 | 2.82E-05 | 1.1 |
| ENO1      | 1.21E-09 | -0.273448216 | 0.445 | 0.541 | 2.91E-05 | 1.1 |
| MIS18BP1  | 1.23E-09 | -0.118300811 | 0.093 | 0.143 | 2.96E-05 | 1.1 |
| RPS27     | 1.26E-09 | 0.159325488  | 0.79  | 0.793 | 3.04E-05 | 1.1 |
| LIF       | 1.27E-09 | -0.119189353 | 0.014 | 0.04  | 3.06E-05 | 1.1 |
| PAIP1     | 1.29E-09 | -0.128857107 | 0.148 | 0.209 | 3.11E-05 | 1.1 |
| EPB41L2   | 1.29E-09 | 0.519339598  | 0.223 | 0.181 | 3.11E-05 | 1.1 |
| SERP1     | 1.30E-09 | 0.24709784   | 0.308 | 0.262 | 3.13E-05 | 1.1 |
| THUMPD2   | 1.31E-09 | -0.105962804 | 0.02  | 0.049 | 3.16E-05 | 1.1 |
| SOX9      | 1.36E-09 | -0.101341575 | 0.154 | 0.216 | 3.28E-05 | 1.1 |
| CCNI      | 1.38E-09 | -0.13389313  | 0.522 | 0.622 | 3.32E-05 | 1.1 |
| WDR1      | 1.43E-09 | -0.119309728 | 0.103 | 0.156 | 3.44E-05 | 1.1 |
| TMEM60    | 1.43E-09 | -0.106232271 | 0.07  | 0.116 | 3.46E-05 | 1.1 |
| NBN       | 1.47E-09 | -0.112937881 | 0.04  | 0.077 | 3.53E-05 | 1.1 |
| ZNF90     | 1.47E-09 | -0.197925132 | 0.084 | 0.131 | 3.54E-05 | 1.1 |
| SLC10A7   | 1.48E-09 | -0.122527136 | 0.035 | 0.069 | 3.57E-05 | 1.1 |
| C5orf15   | 1.49E-09 | -0.106758953 | 0.036 | 0.071 | 3.59E-05 | 1.1 |
| CNN2      | 1.51E-09 | -0.116147    | 0.015 | 0.041 | 3.64E-05 | 1.1 |
| RP11-443B | 1.51E-09 | 0.10009012   | 0.047 | 0.023 | 3.64E-05 | 1.1 |
| LIFR      | 1.52E-09 | -0.142913743 | 0.078 | 0.125 | 3.66E-05 | 1.1 |
| ABR       | 1.53E-09 | -0.123744239 | 0.026 | 0.057 | 3.70E-05 | 1.1 |
| KIF2A     | 1.60E-09 | -0.124375613 | 0.148 | 0.209 | 3.86E-05 | 1.1 |
| MIER1     | 1.60E-09 | 0.30328971   | 0.218 | 0.173 | 3.87E-05 | 1.1 |
| MARS      | 1.62E-09 | -0.131293971 | 0.097 | 0.148 | 3.91E-05 | 1.1 |
| TRAK2     | 1.65E-09 | -0.138455032 | 0.018 | 0.046 | 3.97E-05 | 1.1 |
| KPNA6     | 1.67E-09 | 0.313870219  | 0.309 | 0.266 | 4.03E-05 | 1.1 |
| CCNG2     | 1.68E-09 | 0.256372394  | 0.186 | 0.14  | 4.05E-05 | 1.1 |
| ANKH      | 1.71E-09 | -0.165727816 | 0.045 | 0.083 | 4.12E-05 | 1.1 |
| ARRDC3-AS | 1.71E-09 | -0.108902907 | 0.026 | 0.057 | 4.13E-05 | 1.1 |
| GMEB1     | 1.74E-09 | -0.104427224 | 0.038 | 0.073 | 4.19E-05 | 1.1 |
| SCAF11    | 1.79E-09 | -0.120989359 | 0.239 | 0.315 | 4.32E-05 | 1.1 |
| PIK3C3    | 1.83E-09 | -0.106280185 | 0.064 | 0.108 | 4.41E-05 | 1.1 |
| RPL27A    | 1.92E-09 | -0.194370773 | 0.405 | 0.488 | 4.62E-05 | 1.1 |
| ABCA5     | 1.94E-09 | -0.114200364 | 0.085 | 0.133 | 4.67E-05 | 1.1 |
| ZC3H15    | 1.96E-09 | 0.275634316  | 0.301 | 0.256 | 4.73E-05 | 1.1 |
| BDP1      | 2.00E-09 | 0.302008042  | 0.244 | 0.197 | 4.82E-05 | 1.1 |
| RBBP8     | 2.04E-09 | -0.113807381 | 0.073 | 0.117 | 4.91E-05 | 1.1 |
| VPS37B    | 2.11E-09 | 0.191526455  | 0.191 | 0.142 | 5.08E-05 | 1.1 |
| NDRG2     | 2.11E-09 | -0.150773321 | 0.205 | 0.274 | 5.09E-05 | 1.1 |
| VLDLR-AS1 | 2.21E-09 | -0.107195842 | 0.01  | 0.033 | 5.33E-05 | 1.1 |
| BMPR1B    | 2.22E-09 | -0.175018178 | 0.014 | 0.04  | 5.35E-05 | 1.1 |
| EFTUD1    | 2.29E-09 | -0.148514179 | 0.071 | 0.116 | 5.51E-05 | 1.1 |
| RAB8B     | 2.36E-09 | 0.272398009  | 0.2   | 0.152 | 5.69E-05 | 1.1 |
| SH3BGRL3  | 2.42E-09 | -0.186597794 | 0.028 | 0.06  | 5.82E-05 | 1.1 |
| RP11-111H | 2.43E-09 | -0.102496953 | 0.014 | 0.039 | 5.85E-05 | 1.1 |
| POLR2A    | 2.43E-09 | -0.103686552 | 0.106 | 0.159 | 5.87E-05 | 1.1 |
| RPTOR     | 2.52E-09 | -0.126951935 | 0.036 | 0.071 | 6.07E-05 | 1.1 |

|           |          |              |       |       |           |     |
|-----------|----------|--------------|-------|-------|-----------|-----|
| CWF19L2   | 2.53E-09 | -0.105998558 | 0.101 | 0.154 | 6.10E-05  | 1.1 |
| TMED5     | 2.58E-09 | -0.127219628 | 0.073 | 0.117 | 6.22E-05  | 1.1 |
| ENTPD4    | 2.63E-09 | -0.115846742 | 0.032 | 0.065 | 6.35E-05  | 1.1 |
| PSAP      | 2.71E-09 | -0.150128472 | 0.05  | 0.088 | 6.53E-05  | 1.1 |
| CDK6      | 2.71E-09 | -0.115849838 | 0.18  | 0.247 | 6.55E-05  | 1.1 |
| UNK       | 2.72E-09 | -0.105643834 | 0.028 | 0.059 | 6.57E-05  | 1.1 |
| C1orf43   | 2.74E-09 | -0.11239518  | 0.082 | 0.129 | 6.62E-05  | 1.1 |
| EPAS1     | 2.83E-09 | -0.124377528 | 0.053 | 0.093 | 6.83E-05  | 1.1 |
| PEG10     | 2.84E-09 | 0.215836694  | 0.088 | 0.055 | 6.86E-05  | 1.1 |
| COX6B1    | 2.92E-09 | 0.210433675  | 0.723 | 0.743 | 7.04E-05  | 1.1 |
| WBP5      | 3.08E-09 | 0.311223398  | 0.42  | 0.387 | 7.43E-05  | 1.1 |
| RILPL2    | 3.09E-09 | -0.102703977 | 0.025 | 0.056 | 7.45E-05  | 1.1 |
| ADGRL3-AS | 3.12E-09 | 0.21218394   | 0.692 | 0.656 | 7.53E-05  | 1.1 |
| MBTD1     | 3.21E-09 | -0.115067714 | 0.128 | 0.186 | 7.74E-05  | 1.1 |
| ATP5G1    | 3.26E-09 | 0.288640585  | 0.239 | 0.195 | 7.87E-05  | 1.1 |
| AC008074. | 3.29E-09 | 0.146142046  | 0.062 | 0.035 | 7.92E-05  | 1.1 |
| MIPOL1    | 3.46E-09 | -0.100860709 | 0.016 | 0.042 | 8.34E-05  | 1.1 |
| NEDD4     | 3.46E-09 | -0.131448229 | 0.056 | 0.096 | 8.35E-05  | 1.1 |
| RPS7      | 3.48E-09 | 0.157044183  | 0.976 | 0.966 | 8.40E-05  | 1.1 |
| CARS2     | 3.49E-09 | -0.116265287 | 0.028 | 0.059 | 8.41E-05  | 1.1 |
| SGPP1     | 3.54E-09 | -0.102328828 | 0.038 | 0.072 | 8.54E-05  | 1.1 |
| STK17B    | 3.63E-09 | -0.105011228 | 0.088 | 0.135 | 8.75E-05  | 1.1 |
| RTN3      | 3.65E-09 | -0.120154434 | 0.15  | 0.211 | 8.80E-05  | 1.1 |
| RPS28     | 3.68E-09 | -0.222325077 | 0.08  | 0.125 | 8.88E-05  | 1.1 |
| CLCN3     | 3.72E-09 | -0.10532145  | 0.144 | 0.204 | 8.96E-05  | 1.1 |
| MBTPS1    | 3.75E-09 | -0.106652531 | 0.032 | 0.064 | 9.04E-05  | 1.1 |
| NDUF4F4   | 3.81E-09 | 0.246479681  | 0.141 | 0.101 | 9.18E-05  | 1.1 |
| ERBB4     | 3.98E-09 | -0.153733136 | 0.08  | 0.126 | 9.61E-05  | 1.1 |
| LIAS      | 4.26E-09 | 0.185839658  | 0.089 | 0.056 | 0.0001027 | 1.1 |
| CSNK1A1   | 4.37E-09 | 0.256858165  | 0.592 | 0.598 | 0.0001054 | 1.1 |
| RP11-141N | 4.38E-09 | -0.120186751 | 0.041 | 0.076 | 0.0001056 | 1.1 |
| LSS       | 4.45E-09 | -0.106155437 | 0.027 | 0.058 | 0.0001072 | 1.1 |
| RP11-274H | 4.57E-09 | -0.110398596 | 0.031 | 0.063 | 0.0001101 | 1.1 |
| MYO19     | 4.81E-09 | -0.104449772 | 0.021 | 0.049 | 0.0001159 | 1.1 |
| DEGS1     | 4.83E-09 | -0.110695241 | 0.06  | 0.101 | 0.0001165 | 1.1 |
| POU2F1    | 4.90E-09 | -0.125549641 | 0.101 | 0.151 | 0.0001182 | 1.1 |
| CHMP4B    | 5.01E-09 | 0.266293911  | 0.154 | 0.113 | 0.0001209 | 1.1 |
| PPP2R1A   | 5.03E-09 | -0.107527071 | 0.032 | 0.064 | 0.0001212 | 1.1 |
| PLA2G16   | 5.05E-09 | -0.117842694 | 0.093 | 0.142 | 0.0001217 | 1.1 |
| TMTC3     | 5.09E-09 | -0.10154808  | 0.031 | 0.063 | 0.0001227 | 1.1 |
| CCT2      | 5.19E-09 | 0.241989756  | 0.435 | 0.397 | 0.0001252 | 1.1 |
| IRAK1BP1  | 5.38E-09 | -0.110849261 | 0.046 | 0.083 | 0.0001297 | 1.1 |
| SYNE1     | 5.46E-09 | 0.172462143  | 0.05  | 0.026 | 0.0001316 | 1.1 |
| PLCB4     | 5.64E-09 | -0.140037804 | 0.088 | 0.135 | 0.000136  | 1.1 |
| MAPRE1    | 5.67E-09 | 0.268768052  | 0.19  | 0.147 | 0.0001368 | 1.1 |
| GNG12-AS: | 5.78E-09 | -0.121051711 | 0.028 | 0.059 | 0.0001394 | 1.1 |
| SNX6      | 5.78E-09 | -0.105903145 | 0.303 | 0.387 | 0.0001394 | 1.1 |

|            |          |              |       |       |           |     |
|------------|----------|--------------|-------|-------|-----------|-----|
| RP5-968J1. | 6.11E-09 | 0.101946782  | 0.047 | 0.024 | 0.0001474 | 1.1 |
| ITPR1      | 6.12E-09 | -0.108819397 | 0.021 | 0.049 | 0.0001476 | 1.1 |
| RP11-539L  | 6.25E-09 | 0.103965166  | 0.046 | 0.023 | 0.0001507 | 1.1 |
| COMT       | 6.34E-09 | -0.102146219 | 0.031 | 0.062 | 0.0001528 | 1.1 |
| SCYL2      | 6.37E-09 | 0.295439841  | 0.288 | 0.244 | 0.0001536 | 1.1 |
| MTRNR2L1   | 6.75E-09 | 0.219141093  | 0.216 | 0.168 | 0.0001629 | 1.1 |
| SSU72      | 6.96E-09 | -0.104424193 | 0.023 | 0.051 | 0.0001677 | 1.1 |
| RREB1      | 7.48E-09 | -0.130939754 | 0.216 | 0.282 | 0.0001805 | 1.1 |
| PPM1B      | 7.74E-09 | -0.107681595 | 0.136 | 0.194 | 0.0001866 | 1.1 |
| GPR75-ASB  | 7.80E-09 | -0.118219943 | 0.11  | 0.162 | 0.000188  | 1.1 |
| ENSA       | 7.80E-09 | -0.102313427 | 0.321 | 0.404 | 0.0001881 | 1.1 |
| NEK1       | 7.80E-09 | -0.124692191 | 0.058 | 0.097 | 0.0001882 | 1.1 |
| ZNF385C    | 7.89E-09 | -0.10006983  | 0.018 | 0.044 | 0.0001903 | 1.1 |
| POLH       | 8.01E-09 | 0.120392824  | 0.06  | 0.034 | 0.0001931 | 1.1 |
| S100A16    | 8.23E-09 | -0.194834643 | 0.07  | 0.112 | 0.0001985 | 1.1 |
| C1orf27    | 8.30E-09 | -0.108712305 | 0.09  | 0.138 | 0.0002002 | 1.1 |
| TCEAL4     | 8.39E-09 | 0.282569727  | 0.258 | 0.216 | 0.0002023 | 1.1 |
| TMEM41A    | 8.43E-09 | -0.119104293 | 0.167 | 0.227 | 0.0002032 | 1.1 |
| NCKAP1     | 8.61E-09 | 0.29558443   | 0.431 | 0.402 | 0.0002075 | 1.1 |
| EPB41      | 8.71E-09 | -0.105966397 | 0.106 | 0.157 | 0.0002101 | 1.1 |
| ACTG1      | 9.17E-09 | -0.229054835 | 0.653 | 0.713 | 0.0002211 | 1.1 |
| CDC37      | 9.27E-09 | -0.112859061 | 0.018 | 0.043 | 0.0002236 | 1.1 |
| ADAR       | 9.48E-09 | -0.115549293 | 0.084 | 0.129 | 0.0002285 | 1.1 |
| RP11-557C  | 9.74E-09 | 0.219288752  | 0.084 | 0.053 | 0.0002348 | 1.1 |
| KIF27      | 1.02E-08 | -0.101468569 | 0.028 | 0.057 | 0.0002453 | 1.1 |
| UBE2Q2     | 1.05E-08 | -0.110492775 | 0.046 | 0.081 | 0.0002524 | 1.1 |
| ZMYM2      | 1.07E-08 | -0.100159642 | 0.296 | 0.383 | 0.0002578 | 1.1 |
| RUBCN      | 1.07E-08 | 0.177184514  | 0.091 | 0.058 | 0.0002584 | 1.1 |
| RAC1       | 1.08E-08 | 0.258767099  | 0.5   | 0.484 | 0.0002615 | 1.1 |
| PPM1D      | 1.10E-08 | 0.171171536  | 0.102 | 0.067 | 0.0002643 | 1.1 |
| XPC        | 1.13E-08 | -0.103938364 | 0.017 | 0.042 | 0.000273  | 1.1 |
| TUBB4B     | 1.15E-08 | -0.135147948 | 0.032 | 0.063 | 0.0002777 | 1.1 |
| RP11-758H  | 1.16E-08 | 0.125850239  | 0.035 | 0.016 | 0.0002809 | 1.1 |
| TMX4       | 1.18E-08 | -0.112601899 | 0.026 | 0.055 | 0.0002844 | 1.1 |
| SEPP1      | 1.20E-08 | 0.419245671  | 0.378 | 0.357 | 0.0002898 | 1.1 |
| CASD1      | 1.32E-08 | -0.102447079 | 0.037 | 0.069 | 0.000318  | 1.1 |
| ASNS       | 1.33E-08 | -0.125368624 | 0.055 | 0.092 | 0.0003195 | 1.1 |
| ANXA4      | 1.36E-08 | -0.108344475 | 0.076 | 0.12  | 0.0003288 | 1.1 |
| TRIM26     | 1.41E-08 | -0.10826016  | 0.044 | 0.079 | 0.00034   | 1.1 |
| PLEKHG1    | 1.43E-08 | -0.109326725 | 0.134 | 0.19  | 0.0003438 | 1.1 |
| PTCHD1     | 1.43E-08 | -0.102283762 | 0.056 | 0.094 | 0.0003451 | 1.1 |
| RP11-30J2C | 1.55E-08 | -0.107588864 | 0.017 | 0.042 | 0.0003742 | 1.1 |
| ZNF219     | 1.57E-08 | 0.128253033  | 0.08  | 0.049 | 0.0003786 | 1.1 |
| ATP2B1     | 1.57E-08 | -0.10826756  | 0.025 | 0.053 | 0.0003796 | 1.1 |
| NPC2       | 1.59E-08 | -0.1483505   | 0.397 | 0.484 | 0.0003831 | 1.1 |
| TIAM1      | 1.59E-08 | 0.412289366  | 0.339 | 0.301 | 0.000384  | 1.1 |
| MYBL1      | 1.62E-08 | -0.103002978 | 0.023 | 0.05  | 0.0003894 | 1.1 |

|           |          |              |       |       |           |     |
|-----------|----------|--------------|-------|-------|-----------|-----|
| TBC1D9B   | 1.63E-08 | -0.104925057 | 0.02  | 0.046 | 0.000394  | 1.1 |
| SKI       | 1.74E-08 | -0.102730678 | 0.01  | 0.031 | 0.0004198 | 1.1 |
| PTS       | 1.76E-08 | -0.100832379 | 0.074 | 0.117 | 0.0004255 | 1.1 |
| PRKCA     | 1.78E-08 | 0.25687659   | 0.116 | 0.081 | 0.0004296 | 1.1 |
| GPX1      | 1.80E-08 | -0.11428114  | 0.023 | 0.05  | 0.0004341 | 1.1 |
| CSN3      | 1.84E-08 | 0.153028243  | 0.017 | 0.005 | 0.0004448 | 1.1 |
| FMR1      | 1.86E-08 | 0.17706897   | 0.106 | 0.071 | 0.0004479 | 1.1 |
| STAT3     | 1.89E-08 | 0.335446881  | 0.524 | 0.516 | 0.0004568 | 1.1 |
| GSTO2     | 1.90E-08 | 0.18843632   | 0.147 | 0.107 | 0.0004578 | 1.1 |
| ER13      | 1.91E-08 | -0.112852677 | 0.023 | 0.05  | 0.0004606 | 1.1 |
| OPA1      | 1.96E-08 | -0.117319623 | 0.08  | 0.123 | 0.0004734 | 1.1 |
| RP11-685N | 1.97E-08 | 0.162768308  | 0.073 | 0.044 | 0.0004746 | 1.1 |
| LPL       | 1.97E-08 | -0.110261978 | 0.034 | 0.066 | 0.0004749 | 1.1 |
| DDI2      | 2.05E-08 | -0.103296049 | 0.074 | 0.116 | 0.0004953 | 1.1 |
| PDPR      | 2.10E-08 | -0.106865267 | 0.024 | 0.051 | 0.000506  | 1.1 |
| KLHDC10   | 2.14E-08 | 0.220745521  | 0.151 | 0.111 | 0.000516  | 1.1 |
| IGFBP5    | 2.16E-08 | -0.17662346  | 0.041 | 0.074 | 0.0005219 | 1.1 |
| MTRNR2L1  | 2.17E-08 | 0.250107942  | 0.315 | 0.268 | 0.0005228 | 1.1 |
| FTO       | 2.29E-08 | -0.111657396 | 0.189 | 0.254 | 0.0005512 | 1.1 |
| TSPAN9    | 2.32E-08 | -0.102125498 | 0.044 | 0.078 | 0.0005585 | 1.1 |
| RPL18     | 2.32E-08 | -0.225771742 | 0.089 | 0.132 | 0.0005586 | 1.1 |
| GNAS      | 2.35E-08 | 0.271596281  | 0.591 | 0.603 | 0.0005676 | 1.1 |
| RP11-541P | 2.42E-08 | -0.112482444 | 0.048 | 0.084 | 0.0005826 | 1.1 |
| KDM5C     | 2.44E-08 | 0.173292705  | 0.11  | 0.075 | 0.0005895 | 1.1 |
| CPAMD8    | 2.59E-08 | -0.148529593 | 0.085 | 0.129 | 0.0006246 | 1.1 |
| SAR1A     | 2.63E-08 | 0.262150506  | 0.243 | 0.202 | 0.0006353 | 1.1 |
| UBA2      | 2.64E-08 | 0.219716865  | 0.171 | 0.131 | 0.0006372 | 1.1 |
| RBPJ      | 2.65E-08 | 0.273947426  | 0.422 | 0.395 | 0.0006395 | 1.1 |
| P4HA1     | 2.71E-08 | 0.547079415  | 0.293 | 0.262 | 0.0006523 | 1.1 |
| TRAM1     | 2.72E-08 | 0.225679585  | 0.247 | 0.204 | 0.0006567 | 1.1 |
| KANSL3    | 2.72E-08 | -0.1029884   | 0.039 | 0.072 | 0.0006569 | 1.1 |
| LRP2      | 2.75E-08 | 0.298401231  | 0.264 | 0.221 | 0.0006636 | 1.1 |
| MYEOV2    | 2.78E-08 | -0.113711434 | 0.024 | 0.051 | 0.0006713 | 1.1 |
| ZCWPW2    | 2.87E-08 | -0.119639674 | 0.046 | 0.08  | 0.0006919 | 1.1 |
| BET1      | 2.94E-08 | -0.101452416 | 0.111 | 0.161 | 0.0007101 | 1.1 |
| SPIN1     | 2.97E-08 | 0.26917881   | 0.216 | 0.176 | 0.0007159 | 1.1 |
| MTURN     | 3.01E-08 | -0.102567298 | 0.075 | 0.117 | 0.0007248 | 1.1 |
| PATL1     | 3.03E-08 | -0.108581446 | 0.114 | 0.163 | 0.0007303 | 1.1 |
| C1orf52   | 3.12E-08 | 0.134937517  | 0.072 | 0.044 | 0.0007521 | 1.1 |
| PSMB4     | 3.14E-08 | -0.107267725 | 0.109 | 0.158 | 0.0007567 | 1.1 |
| OPTN      | 3.14E-08 | -0.101331159 | 0.141 | 0.197 | 0.0007578 | 1.1 |
| TOMM20    | 3.24E-08 | 0.199173426  | 0.284 | 0.238 | 0.000782  | 1.1 |
| SEC11A    | 3.28E-08 | 0.214647969  | 0.546 | 0.53  | 0.0007907 | 1.1 |
| ELP4      | 3.39E-08 | -0.101325954 | 0.02  | 0.045 | 0.000817  | 1.1 |
| CBLC      | 3.40E-08 | -0.10763222  | 0.045 | 0.08  | 0.0008193 | 1.1 |
| INSR      | 3.41E-08 | -0.171600608 | 0.586 | 0.674 | 0.0008221 | 1.1 |
| RPL28     | 3.49E-08 | -0.404738657 | 0.098 | 0.14  | 0.0008424 | 1.1 |

|            |          |              |       |       |           |     |
|------------|----------|--------------|-------|-------|-----------|-----|
| PAXBP1     | 3.61E-08 | -0.103673417 | 0.066 | 0.105 | 0.0008705 | 1.1 |
| SSR4       | 3.62E-08 | -0.120190608 | 0.019 | 0.043 | 0.000874  | 1.1 |
| SLK        | 3.67E-08 | 0.197905469  | 0.165 | 0.123 | 0.0008856 | 1.1 |
| BRD4       | 4.01E-08 | 0.202631293  | 0.204 | 0.16  | 0.0009672 | 1.1 |
| CUL3       | 4.03E-08 | 0.313587972  | 0.37  | 0.338 | 0.0009717 | 1.1 |
| SMARCA4    | 4.39E-08 | -0.118917746 | 0.107 | 0.155 | 0.0010593 | 1.1 |
| PGAP1      | 4.40E-08 | 0.154002969  | 0.09  | 0.058 | 0.0010598 | 1.1 |
| RASSF3     | 4.40E-08 | 0.214704114  | 0.181 | 0.138 | 0.0010621 | 1.1 |
| SCAI       | 4.46E-08 | -0.106157917 | 0.058 | 0.095 | 0.0010743 | 1.1 |
| TPR        | 4.47E-08 | -0.113599874 | 0.121 | 0.171 | 0.0010781 | 1.1 |
| RRBP1      | 4.62E-08 | -0.134941068 | 0.047 | 0.081 | 0.0011139 | 1.1 |
| MRE11A     | 4.91E-08 | -0.116581616 | 0.05  | 0.085 | 0.0011846 | 1.1 |
| HDLBP      | 4.94E-08 | -0.101759002 | 0.154 | 0.211 | 0.0011901 | 1.1 |
| STX8       | 4.96E-08 | -0.108546859 | 0.158 | 0.215 | 0.0011969 | 1.1 |
| CCNL1      | 4.97E-08 | 0.288877821  | 0.418 | 0.389 | 0.0011986 | 1.1 |
| TNKS1BP1   | 4.99E-08 | -0.109191937 | 0.033 | 0.063 | 0.001203  | 1.1 |
| BCAP31     | 5.04E-08 | -0.105134425 | 0.045 | 0.078 | 0.0012157 | 1.1 |
| CTC-471J1. | 5.06E-08 | 0.195021103  | 0.742 | 0.762 | 0.0012211 | 1.1 |
| DAB1       | 5.21E-08 | -0.110709911 | 0.04  | 0.073 | 0.0012564 | 1.1 |
| CHD4       | 5.33E-08 | -0.100931571 | 0.067 | 0.107 | 0.001286  | 1.1 |
| RP13-726E  | 5.34E-08 | -0.107555744 | 0.028 | 0.055 | 0.0012871 | 1.1 |
| DDX50      | 5.54E-08 | -0.118811447 | 0.083 | 0.125 | 0.0013353 | 1.1 |
| MBOAT2     | 5.99E-08 | -0.114351776 | 0.085 | 0.128 | 0.0014455 | 1.1 |
| PIP        | 6.20E-08 | 0.211083889  | 0.071 | 0.044 | 0.0014955 | 1.1 |
| SEC63      | 6.36E-08 | 0.261726397  | 0.281 | 0.241 | 0.0015335 | 1.1 |
| GIPC2      | 6.82E-08 | 0.165726479  | 0.057 | 0.033 | 0.0016438 | 1.1 |
| ACADVL     | 6.87E-08 | -0.128306622 | 0.024 | 0.05  | 0.0016569 | 1.1 |
| RAB21      | 6.89E-08 | 0.222245122  | 0.228 | 0.185 | 0.0016605 | 1.1 |
| RPS5       | 6.91E-08 | -0.32379374  | 0.247 | 0.306 | 0.0016669 | 1.1 |
| AP3D1      | 6.97E-08 | -0.10428167  | 0.035 | 0.065 | 0.001681  | 1.1 |
| MRPL20     | 7.16E-08 | -0.107823376 | 0.045 | 0.078 | 0.0017271 | 1.1 |
| FAM60A     | 7.22E-08 | -0.145472582 | 0.338 | 0.415 | 0.0017413 | 1.1 |
| EGR1       | 7.30E-08 | -0.164977428 | 0.051 | 0.086 | 0.0017605 | 1.1 |
| GSTM3      | 7.43E-08 | -0.104991909 | 0.068 | 0.107 | 0.0017925 | 1.1 |
| KMT2E      | 7.69E-08 | 0.311008646  | 0.418 | 0.398 | 0.0018533 | 1.1 |
| SPG20      | 7.73E-08 | -0.101512464 | 0.084 | 0.126 | 0.0018651 | 1.1 |
| TIMM10     | 7.81E-08 | 0.244225075  | 0.281 | 0.242 | 0.0018821 | 1.1 |
| CTC-425F1. | 8.01E-08 | 0.22040676   | 0.107 | 0.073 | 0.0019324 | 1.1 |
| TP53       | 8.29E-08 | -0.110450751 | 0.044 | 0.076 | 0.001998  | 1.1 |
| FBL        | 8.50E-08 | 0.204915053  | 0.248 | 0.206 | 0.0020489 | 1.1 |
| TMEM30A    | 8.72E-08 | -0.103946634 | 0.12  | 0.17  | 0.0021019 | 1.1 |
| FNBP4      | 8.72E-08 | 0.266367249  | 0.471 | 0.451 | 0.0021037 | 1.1 |
| CBL        | 8.75E-08 | -0.102192706 | 0.065 | 0.102 | 0.002111  | 1.1 |
| ETFA       | 9.02E-08 | -0.103177461 | 0.072 | 0.112 | 0.0021739 | 1.1 |
| TCEB2      | 9.37E-08 | -0.126325498 | 0.023 | 0.048 | 0.0022601 | 1.1 |
| GSTA1      | 9.39E-08 | 0.404766038  | 0.115 | 0.08  | 0.0022631 | 1.1 |
| PSMD4      | 9.69E-08 | -0.115931621 | 0.067 | 0.105 | 0.0023368 | 1.1 |

|           |          |              |       |       |           |     |
|-----------|----------|--------------|-------|-------|-----------|-----|
| ELOVL7    | 9.89E-08 | -0.135919259 | 0.058 | 0.093 | 0.002384  | 1.1 |
| GPX4      | 1.00E-07 | -0.121664693 | 0.02  | 0.045 | 0.0024204 | 1.1 |
| HNRNPUL1  | 1.04E-07 | -0.116154479 | 0.077 | 0.117 | 0.0025162 | 1.1 |
| MTHFD1L   | 1.05E-07 | -0.17381634  | 0.241 | 0.303 | 0.0025411 | 1.1 |
| FOXK2     | 1.08E-07 | 0.290677107  | 0.326 | 0.293 | 0.0026049 | 1.1 |
| RP11-371F | 1.14E-07 | -0.114254956 | 0.017 | 0.04  | 0.0027474 | 1.1 |
| NFRKB     | 1.18E-07 | 0.127910461  | 0.078 | 0.05  | 0.0028468 | 1.1 |
| LGALS8    | 1.19E-07 | -0.113680948 | 0.091 | 0.134 | 0.0028584 | 1.1 |
| ETS2      | 1.22E-07 | 0.193665213  | 0.155 | 0.115 | 0.0029531 | 1.1 |
| CTD-2528L | 1.24E-07 | 0.159645874  | 0.055 | 0.031 | 0.0029868 | 1.1 |
| KLF5      | 1.24E-07 | 0.262651313  | 0.259 | 0.217 | 0.0029919 | 1.1 |
| EML5      | 1.24E-07 | -0.118647438 | 0.079 | 0.119 | 0.0029943 | 1.1 |
| OSBPL8    | 1.27E-07 | -0.113335861 | 0.125 | 0.176 | 0.0030732 | 1.1 |
| CHMP2B    | 1.36E-07 | 0.189831301  | 0.142 | 0.105 | 0.0032913 | 1.1 |
| PRMT1     | 1.38E-07 | -0.110262424 | 0.015 | 0.037 | 0.0033165 | 1.1 |
| MAFF      | 1.43E-07 | 0.236819269  | 0.233 | 0.191 | 0.0034411 | 1.1 |
| REXO2     | 1.44E-07 | -0.110621294 | 0.056 | 0.09  | 0.0034614 | 1.1 |
| POMP      | 1.45E-07 | -0.207117816 | 0.611 | 0.678 | 0.0035046 | 1.1 |
| MAP4      | 1.47E-07 | -0.119807907 | 0.374 | 0.452 | 0.0035416 | 1.1 |
| EIF1      | 1.59E-07 | -0.137171402 | 0.373 | 0.448 | 0.0038353 | 1.1 |
| TULP3     | 1.66E-07 | -0.102439148 | 0.058 | 0.093 | 0.0039995 | 1.1 |
| ARHGDI8   | 1.70E-07 | 0.289698721  | 0.208 | 0.169 | 0.004088  | 1.1 |
| IL32      | 1.86E-07 | -0.132068921 | 0.048 | 0.08  | 0.0044756 | 1.1 |
| EEF1D     | 1.93E-07 | -0.152465796 | 0.093 | 0.134 | 0.0046567 | 1.1 |
| METAP1    | 1.93E-07 | 0.186915815  | 0.115 | 0.082 | 0.0046653 | 1.1 |
| ZMYM5     | 1.99E-07 | 0.240474963  | 0.201 | 0.162 | 0.0047901 | 1.1 |
| KCNK5     | 2.09E-07 | -0.100725273 | 0.019 | 0.042 | 0.0050447 | 1.1 |
| ZRANB1    | 2.13E-07 | 0.227541942  | 0.186 | 0.147 | 0.0051394 | 1.1 |
| YBX1      | 2.15E-07 | -0.131467306 | 0.293 | 0.358 | 0.0051941 | 1.1 |
| TPD52     | 2.24E-07 | 0.235961474  | 0.199 | 0.16  | 0.0054001 | 1.1 |
| HADHA     | 2.29E-07 | 0.259953481  | 0.373 | 0.347 | 0.0055257 | 1.1 |
| SIL1      | 2.30E-07 | -0.101415099 | 0.078 | 0.119 | 0.0055572 | 1.1 |
| IRF2BP2   | 2.34E-07 | 0.254154497  | 0.159 | 0.123 | 0.0056396 | 1.1 |
| SMARCC2   | 2.40E-07 | -0.115604716 | 0.068 | 0.105 | 0.0057819 | 1.1 |
| EYS       | 2.41E-07 | -0.10022182  | 0.046 | 0.078 | 0.0058066 | 1.1 |
| OSTC      | 2.58E-07 | 0.226293092  | 0.512 | 0.502 | 0.0062331 | 1.1 |
| OCLN      | 2.63E-07 | 0.310211614  | 0.335 | 0.307 | 0.0063433 | 1.1 |
| PNPLA8    | 2.80E-07 | 0.370693806  | 0.312 | 0.281 | 0.0067531 | 1.1 |
| UGGT1     | 2.97E-07 | -0.103373403 | 0.033 | 0.061 | 0.0071698 | 1.1 |
| KIAA1217  | 2.99E-07 | -0.117239587 | 0.769 | 0.842 | 0.0072198 | 1.1 |
| ARHGFE12  | 3.10E-07 | 0.29293275   | 0.448 | 0.427 | 0.0074813 | 1.1 |
| RPS18     | 3.38E-07 | 0.121112547  | 0.694 | 0.671 | 0.0081569 | 1.1 |
| GABRP     | 3.46E-07 | -0.183478626 | 0.496 | 0.569 | 0.0083465 | 1.1 |
| DSP       | 3.48E-07 | -0.109754268 | 0.29  | 0.362 | 0.0084002 | 1.1 |
| PRKCI     | 3.59E-07 | 0.270065426  | 0.266 | 0.228 | 0.0086447 | 1.1 |
| WHSC1     | 3.62E-07 | -0.100544643 | 0.089 | 0.13  | 0.0087207 | 1.1 |
| ARIH1     | 3.68E-07 | 0.296638382  | 0.439 | 0.415 | 0.0088776 | 1.1 |

|        |          |              |       |       |           |     |
|--------|----------|--------------|-------|-------|-----------|-----|
| MYO10  | 3.68E-07 | -0.104714567 | 0.15  | 0.2   | 0.0088784 | 1.1 |
| COL6A1 | 3.93E-07 | -0.132443894 | 0.027 | 0.052 | 0.0094733 | 1.1 |
| AK2    | 4.67E-07 | 0.184525865  | 0.17  | 0.132 | 0.0112585 | 1.1 |
| PTRF   | 4.81E-07 | 0.212406718  | 0.206 | 0.166 | 0.011594  | 1.1 |
| MAN1A2 | 5.07E-07 | -0.119358622 | 0.145 | 0.194 | 0.0122237 | 1.1 |
| PAIP2  | 5.34E-07 | -0.121297985 | 0.102 | 0.144 | 0.0128811 | 1.1 |
| LAMP2  | 5.63E-07 | 0.304466759  | 0.278 | 0.243 | 0.0135826 | 1.1 |
| TRAF6  | 5.65E-07 | 0.143494829  | 0.079 | 0.052 | 0.0136354 | 1.1 |
| UQCRHL | 5.77E-07 | 0.244554303  | 0.302 | 0.271 | 0.0139179 | 1.1 |
| RBMX   | 6.29E-07 | -0.10177201  | 0.203 | 0.261 | 0.0151576 | 1.1 |
| NPC1   | 7.19E-07 | 0.343072143  | 0.339 | 0.318 | 0.0173285 | 1.1 |
| LSM5   | 7.26E-07 | 0.237404791  | 0.444 | 0.434 | 0.0174993 | 1.1 |
| HMGCS1 | 7.63E-07 | -0.122602672 | 0.194 | 0.25  | 0.0183949 | 1.1 |
| CDKN1B | 7.67E-07 | 0.122568393  | 0.088 | 0.06  | 0.0185013 | 1.1 |
| SPECC1 | 7.96E-07 | -0.117396256 | 0.036 | 0.063 | 0.0191971 | 1.1 |
| LATS1  | 7.99E-07 | -0.112647012 | 0.079 | 0.116 | 0.0192609 | 1.1 |
| LALBA  | 7.99E-07 | 0.715802396  | 0.023 | 0.01  | 0.0192751 | 1.1 |
| GCH1   | 8.12E-07 | -0.118605284 | 0.065 | 0.1   | 0.0195679 | 1.1 |
| TPRKB  | 8.22E-07 | 0.248582706  | 0.24  | 0.204 | 0.0198207 | 1.1 |
| FIGN   | 9.21E-07 | -0.135285578 | 0.103 | 0.144 | 0.022203  | 1.1 |
| PTN    | 9.21E-07 | 0.624743553  | 0.257 | 0.221 | 0.0222124 | 1.1 |
| MPZL3  | 9.72E-07 | 0.282962587  | 0.328 | 0.299 | 0.0234339 | 1.1 |
| PPP4R1 | 9.75E-07 | 0.222145723  | 0.232 | 0.194 | 0.0235129 | 1.1 |
| LRRC1  | 9.86E-07 | 0.15051928   | 0.085 | 0.057 | 0.0237802 | 1.1 |
| MECP2  | 9.89E-07 | -0.103165256 | 0.05  | 0.08  | 0.0238536 | 1.1 |
| HAPLN3 | 1.00E-06 | -0.103164228 | 0.022 | 0.044 | 0.0241243 | 1.1 |
| SEMA3C | 1.01E-06 | 0.219233662  | 0.088 | 0.06  | 0.0242693 | 1.1 |
| FXYD3  | 1.06E-06 | 0.235472181  | 0.532 | 0.52  | 0.0256236 | 1.1 |
| IGFBP3 | 1.11E-06 | 0.267642396  | 0.143 | 0.108 | 0.0267934 | 1.1 |
| ACTR3  | 1.24E-06 | 0.243240897  | 0.326 | 0.294 | 0.0297807 | 1.1 |
| LOX    | 1.30E-06 | -0.101797977 | 0.038 | 0.064 | 0.0314246 | 1.1 |
| UBE2G2 | 1.41E-06 | -0.10618206  | 0.045 | 0.073 | 0.0339363 | 1.1 |
| PDGFRL | 1.43E-06 | -0.101891536 | 0.036 | 0.063 | 0.0344426 | 1.1 |
| PRNP   | 1.50E-06 | -0.109003175 | 0.105 | 0.145 | 0.0361134 | 1.1 |
| RPS8   | 1.53E-06 | 0.12392114   | 0.758 | 0.78  | 0.0368226 | 1.1 |
| INSIG2 | 1.53E-06 | 0.310279072  | 0.261 | 0.227 | 0.037013  | 1.1 |
| TULP2  | 1.54E-06 | 0.106286816  | 0.048 | 0.028 | 0.0372269 | 1.1 |
| EDF1   | 1.79E-06 | -0.135433876 | 0.055 | 0.086 | 0.0432543 | 1.1 |
| KIF13B | 1.91E-06 | 0.33873057   | 0.314 | 0.288 | 0.0461031 | 1.1 |
| AZIN1  | 1.96E-06 | 0.169276466  | 0.146 | 0.112 | 0.047181  | 1.1 |
| RTKN2  | 2.01E-06 | 0.137083637  | 0.051 | 0.03  | 0.04837   | 1.1 |
| DCTN6  | 2.03E-06 | 0.250202697  | 0.364 | 0.338 | 0.0489333 | 1.1 |
| MREG   | 2.04E-06 | 0.191361234  | 0.118 | 0.087 | 0.0490934 | 1.1 |
| TFDP2  | 2.06E-06 | -0.10788646  | 0.19  | 0.242 | 0.0497506 | 1.1 |
| IL20   | 2.11E-06 | -0.127576246 | 0.004 | 0.017 | 0.0508488 | 1.1 |
| GPC5   | 2.12E-06 | -0.103175248 | 0.023 | 0.045 | 0.0511968 | 1.1 |
| LIPH   | 2.17E-06 | 0.277758372  | 0.487 | 0.462 | 0.0522556 | 1.1 |

|           |          |              |       |       |           |     |
|-----------|----------|--------------|-------|-------|-----------|-----|
| RP11-299J | 2.25E-06 | 0.126448139  | 0.079 | 0.053 | 0.0541945 | 1.1 |
| AC004231  | 2.26E-06 | -0.121929143 | 0.043 | 0.071 | 0.0545396 | 1.1 |
| EZR       | 2.36E-06 | 0.284187337  | 0.335 | 0.302 | 0.0568979 | 1.1 |
| YWHAG     | 2.46E-06 | 0.253465047  | 0.254 | 0.223 | 0.0592211 | 1.1 |
| SRSF2     | 2.48E-06 | -0.103592396 | 0.063 | 0.095 | 0.0598143 | 1.1 |
| WDR45B    | 2.52E-06 | 0.268836158  | 0.308 | 0.279 | 0.0607106 | 1.1 |
| RNF19A    | 2.70E-06 | 0.302621128  | 0.619 | 0.627 | 0.0651434 | 1.1 |
| SH3BGRL   | 2.83E-06 | 0.255145172  | 0.265 | 0.233 | 0.0682108 | 1.1 |
| MAP3K1    | 3.21E-06 | 0.260059114  | 0.237 | 0.203 | 0.0774026 | 1.1 |
| SRRM2     | 3.43E-06 | 0.179644157  | 0.227 | 0.19  | 0.0826229 | 1.1 |
| YY1AP1    | 3.67E-06 | 0.190491945  | 0.193 | 0.159 | 0.0885757 | 1.1 |
| DAPK1     | 3.99E-06 | 0.175698983  | 0.664 | 0.666 | 0.0961498 | 1.1 |
| RPS15     | 4.33E-06 | -0.298754063 | 0.14  | 0.182 | 0.1045211 | 1.1 |
| STX3      | 4.36E-06 | 0.180487964  | 0.122 | 0.091 | 0.10515   | 1.1 |
| RP1-117O3 | 4.58E-06 | 0.148725597  | 0.067 | 0.044 | 0.1104328 | 1.1 |
| TCEB3     | 4.84E-06 | 0.129767115  | 0.093 | 0.065 | 0.1168001 | 1.1 |
| PVRL2     | 4.89E-06 | 0.19671994   | 0.203 | 0.167 | 0.1179145 | 1.1 |
| SMAP1     | 4.94E-06 | -0.100027909 | 0.08  | 0.115 | 0.1190612 | 1.1 |
| MGAT5     | 5.11E-06 | 0.269033558  | 0.329 | 0.303 | 0.1232093 | 1.1 |
| RP11-496N | 5.11E-06 | 0.254802919  | 0.027 | 0.013 | 0.1232464 | 1.1 |
| LMO7      | 5.23E-06 | -0.122568808 | 0.056 | 0.085 | 0.126044  | 1.1 |
| ELMSAN1   | 5.33E-06 | 0.14669262   | 0.102 | 0.074 | 0.1284723 | 1.1 |
| YWHAZ     | 5.37E-06 | 0.194529417  | 0.578 | 0.593 | 0.129497  | 1.1 |
| CHIC2     | 5.70E-06 | 0.31591718   | 0.253 | 0.223 | 0.1375393 | 1.1 |
| HMGA1     | 5.79E-06 | -0.11899931  | 0.108 | 0.146 | 0.1395553 | 1.1 |
| ARMCX3    | 6.22E-06 | 0.180064138  | 0.174 | 0.141 | 0.150094  | 1.1 |
| RP11-817J | 6.39E-06 | 0.211038264  | 0.133 | 0.103 | 0.1541796 | 1.1 |
| PREPL     | 6.44E-06 | 0.166667954  | 0.155 | 0.122 | 0.1552837 | 1.1 |
| ACIN1     | 7.82E-06 | 0.147834723  | 0.173 | 0.139 | 0.1886407 | 1.1 |
| TPT1      | 8.19E-06 | -0.266383569 | 0.811 | 0.842 | 0.1974964 | 1.1 |
| SAMD5     | 8.39E-06 | 0.1109856    | 0.079 | 0.054 | 0.2024175 | 1.1 |
| CA2       | 8.78E-06 | -0.105706895 | 0.048 | 0.075 | 0.2116791 | 1.1 |
| LMTK2     | 9.66E-06 | 0.24785884   | 0.179 | 0.148 | 0.2328265 | 1.1 |
| CTR9      | 9.76E-06 | 0.177700657  | 0.113 | 0.085 | 0.2354175 | 1.1 |
| RP11-314N | 1.03E-05 | 0.25852006   | 0.17  | 0.138 | 0.2490987 | 1.1 |
| MRPL42    | 1.05E-05 | 0.212294663  | 0.208 | 0.175 | 0.2536335 | 1.1 |
| USP38     | 1.08E-05 | 0.160424392  | 0.065 | 0.044 | 0.2613335 | 1.1 |
| TEX14     | 1.16E-05 | 0.436259534  | 0.276 | 0.246 | 0.2802898 | 1.1 |
| EPS8L2    | 1.18E-05 | -0.10986375  | 0.024 | 0.044 | 0.2842522 | 1.1 |
| SERF2     | 1.20E-05 | -0.201732671 | 0.228 | 0.277 | 0.2904617 | 1.1 |
| SEC23B    | 1.23E-05 | -0.100599049 | 0.065 | 0.095 | 0.2964282 | 1.1 |
| PAICS     | 1.25E-05 | 0.186841478  | 0.235 | 0.203 | 0.3010442 | 1.1 |
| USP47     | 1.32E-05 | 0.257406048  | 0.331 | 0.307 | 0.3186457 | 1.1 |
| SARS      | 1.38E-05 | 0.17871216   | 0.228 | 0.196 | 0.3320313 | 1.1 |
| WBP4      | 1.38E-05 | 0.178714069  | 0.146 | 0.116 | 0.3330945 | 1.1 |
| EIF5      | 1.46E-05 | 0.263297126  | 0.225 | 0.195 | 0.3523784 | 1.1 |
| RFC1      | 1.51E-05 | 0.209999862  | 0.283 | 0.255 | 0.3630211 | 1.1 |



|           |          |              |       |       |           |     |
|-----------|----------|--------------|-------|-------|-----------|-----|
| CCNK      | 1.53E-05 | 0.204615237  | 0.145 | 0.116 | 0.3700589 | 1.1 |
| KLHL24    | 1.67E-05 | 0.241981444  | 0.297 | 0.271 | 0.4023469 | 1.1 |
| SLU7      | 1.69E-05 | 0.180716036  | 0.163 | 0.131 | 0.4082606 | 1.1 |
| RASGEF1C  | 1.74E-05 | 0.189416949  | 0.093 | 0.068 | 0.4184393 | 1.1 |
| TOX3      | 2.05E-05 | 0.115715348  | 0.047 | 0.029 | 0.494698  | 1.1 |
| SNHG8     | 2.22E-05 | 0.244577005  | 0.336 | 0.312 | 0.5348056 | 1.1 |
| BARX2     | 2.24E-05 | 0.256481731  | 0.401 | 0.377 | 0.5404099 | 1.1 |
| FAM133B   | 2.31E-05 | 0.153345489  | 0.141 | 0.111 | 0.5579377 | 1.1 |
| FHIT      | 2.41E-05 | -0.126727364 | 0.343 | 0.402 | 0.5822366 | 1.1 |
| ZNF165    | 2.46E-05 | 0.17446793   | 0.08  | 0.057 | 0.5927461 | 1.1 |
| DSC2      | 2.56E-05 | 0.250662395  | 0.26  | 0.233 | 0.6176003 | 1.1 |
| PFDN1     | 2.76E-05 | 0.198575315  | 0.258 | 0.226 | 0.6665597 | 1.1 |
| SBF2      | 2.76E-05 | 0.284576184  | 0.622 | 0.671 | 0.6665799 | 1.1 |
| SEL1L2    | 2.80E-05 | -0.124488562 | 0.008 | 0.02  | 0.6740151 | 1.1 |
| CLDN1     | 2.90E-05 | -0.119012818 | 0.367 | 0.429 | 0.7001915 | 1.1 |
| C3orf52   | 2.97E-05 | 0.136468348  | 0.087 | 0.062 | 0.7167702 | 1.1 |
| IFT57     | 3.01E-05 | 0.217066702  | 0.147 | 0.119 | 0.7247723 | 1.1 |
| CAPZA2    | 3.03E-05 | 0.253425078  | 0.346 | 0.324 | 0.729449  | 1.1 |
| KRT18     | 3.05E-05 | 0.125245044  | 0.104 | 0.077 | 0.7356417 | 1.1 |
| TBC1D22B  | 3.06E-05 | 0.216576298  | 0.208 | 0.177 | 0.7370952 | 1.1 |
| MTF2      | 3.07E-05 | 0.223414965  | 0.237 | 0.206 | 0.7406241 | 1.1 |
| KRAS      | 3.40E-05 | 0.173520147  | 0.165 | 0.135 | 0.819016  | 1.1 |
| COMMD6    | 3.53E-05 | 0.222297148  | 0.423 | 0.411 | 0.8522622 | 1.1 |
| SESN2     | 3.54E-05 | 0.176129316  | 0.126 | 0.098 | 0.8547309 | 1.1 |
| FGD4      | 3.71E-05 | 0.265404096  | 0.284 | 0.26  | 0.8954274 | 1.1 |
| MPRIP-AS1 | 3.88E-05 | 0.140185548  | 0.072 | 0.05  | 0.9347512 | 1.1 |
| HLA-DRB1  | 3.95E-05 | 0.134931396  | 0.081 | 0.058 | 0.9527708 | 1.1 |
| NDUFV2    | 4.11E-05 | 0.185038942  | 0.176 | 0.146 | 0.9908862 | 1.1 |
| KRT80     | 4.19E-05 | 0.10854784   | 0.055 | 0.036 | 1         | 1.1 |
| AC016995. | 4.20E-05 | -0.154325308 | 0.169 | 0.208 | 1         | 1.1 |
| FAM162A   | 4.27E-05 | 0.183218001  | 0.165 | 0.135 | 1         | 1.1 |
| HMG2      | 4.30E-05 | 0.116241721  | 0.08  | 0.057 | 1         | 1.1 |
| ARMCX6    | 4.37E-05 | 0.122115214  | 0.09  | 0.067 | 1         | 1.1 |
| EFNB2     | 4.65E-05 | 0.148640104  | 0.146 | 0.116 | 1         | 1.1 |
| SF3B6     | 4.68E-05 | 0.132668335  | 0.649 | 0.67  | 1         | 1.1 |
| RPL36     | 4.82E-05 | -0.315255731 | 0.214 | 0.253 | 1         | 1.1 |
| RPL3      | 4.83E-05 | -0.142927047 | 0.323 | 0.377 | 1         | 1.1 |
| RP11-437B | 5.08E-05 | 0.247765665  | 0.404 | 0.391 | 1         | 1.1 |
| TAGAP     | 5.12E-05 | 0.105601408  | 0.037 | 0.022 | 1         | 1.1 |
| MAGI1     | 5.27E-05 | 0.181368934  | 0.783 | 0.819 | 1         | 1.1 |
| IRF6      | 5.51E-05 | 0.215264849  | 0.242 | 0.214 | 1         | 1.1 |
| RAB11A    | 5.59E-05 | 0.365748538  | 0.58  | 0.607 | 1         | 1.1 |
| PIAS2     | 5.85E-05 | 0.155678044  | 0.115 | 0.089 | 1         | 1.1 |
| OSBP      | 5.99E-05 | 0.194658076  | 0.164 | 0.136 | 1         | 1.1 |
| UBE2G1    | 6.06E-05 | 0.240806528  | 0.207 | 0.179 | 1         | 1.1 |
| GSTA4     | 6.14E-05 | 0.109899969  | 0.086 | 0.063 | 1         | 1.1 |
| RPS9      | 6.37E-05 | -0.358031455 | 0.266 | 0.311 | 1         | 1.1 |

|           |          |              |       |       |   |     |
|-----------|----------|--------------|-------|-------|---|-----|
| FAM129A   | 6.41E-05 | 0.202694063  | 0.498 | 0.472 | 1 | 1.1 |
| LMNA      | 6.64E-05 | 0.215348203  | 0.229 | 0.197 | 1 | 1.1 |
| HIST1H4C  | 6.91E-05 | 0.262911394  | 0.246 | 0.219 | 1 | 1.1 |
| AIM1      | 7.07E-05 | 0.362602809  | 0.325 | 0.31  | 1 | 1.1 |
| TBCA      | 7.13E-05 | -0.102698432 | 0.627 | 0.697 | 1 | 1.1 |
| SERINC1   | 7.39E-05 | 0.213206065  | 0.323 | 0.301 | 1 | 1.1 |
| IP6K2     | 7.51E-05 | 0.224368198  | 0.234 | 0.207 | 1 | 1.1 |
| RPL12     | 7.89E-05 | 0.188971481  | 0.406 | 0.39  | 1 | 1.1 |
| FABP6     | 8.96E-05 | 0.308038686  | 0.06  | 0.041 | 1 | 1.1 |
| RPS6KB1   | 9.33E-05 | 0.111184355  | 0.102 | 0.077 | 1 | 1.1 |
| KLF6      | 9.73E-05 | 0.244040689  | 0.526 | 0.526 | 1 | 1.1 |
| PLK2      | 9.98E-05 | 0.177477624  | 0.129 | 0.103 | 1 | 1.1 |
| FAU       | 0.000101 | -0.176623145 | 0.183 | 0.22  | 1 | 1.1 |
| LINC00887 | 0.000102 | 0.204148789  | 0.083 | 0.061 | 1 | 1.1 |
| ADGRL2    | 0.000103 | -0.123478425 | 0.102 | 0.133 | 1 | 1.1 |
| DPCD      | 0.00011  | 0.154781204  | 0.094 | 0.071 | 1 | 1.1 |
| PIWIL1    | 0.000112 | 0.188747227  | 0.073 | 0.053 | 1 | 1.1 |
| MARK3     | 0.000128 | 0.20475683   | 0.438 | 0.431 | 1 | 1.1 |
| SIAH2     | 0.00013  | -0.119923959 | 0.043 | 0.065 | 1 | 1.1 |
| HSPB11    | 0.000139 | 0.158270091  | 0.093 | 0.07  | 1 | 1.1 |
| RUVBL1    | 0.00015  | 0.16744223   | 0.148 | 0.121 | 1 | 1.1 |
| NXF1      | 0.000157 | 0.126103942  | 0.1   | 0.077 | 1 | 1.1 |
| RPL8      | 0.00016  | -0.333220996 | 0.163 | 0.197 | 1 | 1.1 |
| PHKG1     | 0.000163 | 0.115936091  | 0.071 | 0.051 | 1 | 1.1 |
| RSBN1     | 0.000166 | 0.115798251  | 0.078 | 0.057 | 1 | 1.1 |
| NET1      | 0.000168 | 0.201277731  | 0.209 | 0.183 | 1 | 1.1 |
| FEM1B     | 0.000171 | 0.125466626  | 0.147 | 0.118 | 1 | 1.1 |
| DECR1     | 0.00018  | 0.16463098   | 0.165 | 0.138 | 1 | 1.1 |
| BTG3      | 0.000186 | 0.189449768  | 0.213 | 0.187 | 1 | 1.1 |
| PEX13     | 0.000197 | 0.153493426  | 0.139 | 0.113 | 1 | 1.1 |
| CLCA4     | 0.000202 | 0.158520435  | 0.047 | 0.031 | 1 | 1.1 |
| CANX      | 0.000209 | 0.172169457  | 0.352 | 0.331 | 1 | 1.1 |
| SLC25A33  | 0.000221 | 0.310191366  | 0.153 | 0.128 | 1 | 1.1 |
| DDX24     | 0.000225 | 0.212840694  | 0.607 | 0.633 | 1 | 1.1 |
| LINC01198 | 0.00026  | 0.295504519  | 0.327 | 0.311 | 1 | 1.1 |
| HBP1      | 0.000263 | 0.207108894  | 0.245 | 0.221 | 1 | 1.1 |
| VCL       | 0.000266 | 0.182594646  | 0.34  | 0.317 | 1 | 1.1 |
| PARD6B    | 0.000277 | 0.170686287  | 0.161 | 0.136 | 1 | 1.1 |
| STRAP     | 0.000288 | 0.155501139  | 0.144 | 0.118 | 1 | 1.1 |
| FBLIM1    | 0.000289 | 0.16486726   | 0.165 | 0.139 | 1 | 1.1 |
| DDX47     | 0.000313 | 0.165475122  | 0.059 | 0.042 | 1 | 1.1 |
| NBEAL1    | 0.000317 | 0.108239674  | 0.682 | 0.689 | 1 | 1.1 |
| PPIH      | 0.000347 | 0.140836911  | 0.128 | 0.104 | 1 | 1.1 |
| WASF2     | 0.000373 | 0.19921052   | 0.233 | 0.209 | 1 | 1.1 |
| NFKB1     | 0.000375 | 0.423822225  | 0.399 | 0.402 | 1 | 1.1 |
| RPL9      | 0.000378 | 0.12725286   | 0.668 | 0.673 | 1 | 1.1 |
| RPL29     | 0.000379 | -0.361228504 | 0.272 | 0.309 | 1 | 1.1 |

|            |          |              |       |       |   |     |
|------------|----------|--------------|-------|-------|---|-----|
| NIPBL      | 0.000394 | 0.263039847  | 0.47  | 0.48  | 1 | 1.1 |
| ANP32B     | 0.000396 | 0.155819988  | 0.203 | 0.177 | 1 | 1.1 |
| BCL10      | 0.000411 | 0.166767471  | 0.146 | 0.122 | 1 | 1.1 |
| RP11-293M  | 0.000448 | 0.13469678   | 0.071 | 0.053 | 1 | 1.1 |
| LEMD3      | 0.000458 | 0.126089418  | 0.081 | 0.062 | 1 | 1.1 |
| DNAJB9     | 0.000489 | 0.128721662  | 0.075 | 0.056 | 1 | 1.1 |
| CAMSAP1    | 0.000549 | 0.164517132  | 0.092 | 0.072 | 1 | 1.1 |
| TGFBR3     | 0.00055  | 0.159621119  | 0.212 | 0.185 | 1 | 1.1 |
| EIF4A3     | 0.000585 | 0.116855544  | 0.116 | 0.093 | 1 | 1.1 |
| SNX1       | 0.00062  | 0.191590053  | 0.157 | 0.134 | 1 | 1.1 |
| DUSP10     | 0.00062  | 0.119339636  | 0.075 | 0.056 | 1 | 1.1 |
| NDUFA5     | 0.000651 | 0.210945118  | 0.309 | 0.295 | 1 | 1.1 |
| RP11-659O  | 0.000656 | 0.217585525  | 0.205 | 0.182 | 1 | 1.1 |
| AC195454.  | 0.000659 | 0.13027261   | 0.063 | 0.045 | 1 | 1.1 |
| TANC2      | 0.000674 | 0.216333577  | 0.304 | 0.286 | 1 | 1.1 |
| NR3C1      | 0.000724 | 0.211423146  | 0.263 | 0.244 | 1 | 1.1 |
| GATA3      | 0.000739 | 0.189544916  | 0.182 | 0.158 | 1 | 1.1 |
| LINGO1     | 0.000751 | 0.119273875  | 0.88  | 0.885 | 1 | 1.1 |
| OAZ2       | 0.000767 | 0.143962755  | 0.099 | 0.079 | 1 | 1.1 |
| RPS19      | 0.000778 | -0.485398092 | 0.241 | 0.272 | 1 | 1.1 |
| RNF11      | 0.000823 | 0.161719354  | 0.174 | 0.151 | 1 | 1.1 |
| TCF7L2     | 0.000848 | 0.280037115  | 0.441 | 0.448 | 1 | 1.1 |
| ZBTB16     | 0.000858 | 0.241389157  | 0.293 | 0.272 | 1 | 1.1 |
| RAB5A      | 0.000867 | 0.184923779  | 0.237 | 0.215 | 1 | 1.1 |
| NONO       | 0.000925 | 0.172144582  | 0.401 | 0.395 | 1 | 1.1 |
| COPZ1      | 0.000949 | 0.210219032  | 0.355 | 0.348 | 1 | 1.1 |
| TAGLN      | 0.000998 | -0.272069324 | 0.016 | 0.028 | 1 | 1.1 |
| CCT5       | 0.001003 | -0.106761334 | 0.342 | 0.388 | 1 | 1.1 |
| TTC33      | 0.001012 | 0.117028023  | 0.075 | 0.057 | 1 | 1.1 |
| CCDC85C    | 0.001039 | 0.122700799  | 0.068 | 0.051 | 1 | 1.1 |
| CTSV       | 0.001083 | 0.526596611  | 0.235 | 0.215 | 1 | 1.1 |
| KLRD1      | 0.001179 | 0.142497767  | 0.086 | 0.068 | 1 | 1.1 |
| C14orf2    | 0.00119  | 0.129661547  | 0.705 | 0.721 | 1 | 1.1 |
| DDB1       | 0.001276 | 0.155298822  | 0.11  | 0.09  | 1 | 1.1 |
| RP3-510L9. | 0.001296 | 0.149932543  | 0.081 | 0.063 | 1 | 1.1 |
| ACVR1      | 0.001353 | 0.172527948  | 0.137 | 0.116 | 1 | 1.1 |
| FAM46B     | 0.001371 | 0.159665674  | 0.087 | 0.068 | 1 | 1.1 |
| RP11-244N  | 0.001372 | 0.166323358  | 0.535 | 0.558 | 1 | 1.1 |
| FAR1       | 0.001427 | 0.144196869  | 0.126 | 0.105 | 1 | 1.1 |
| AKAP9      | 0.001443 | 0.209520268  | 0.369 | 0.36  | 1 | 1.1 |
| BHLHE40    | 0.001477 | 0.138865286  | 0.118 | 0.097 | 1 | 1.1 |
| PDZD11     | 0.001488 | 0.10125787   | 0.109 | 0.089 | 1 | 1.1 |
| FNDC3A     | 0.00153  | 0.231760311  | 0.338 | 0.326 | 1 | 1.1 |
| SYAP1      | 0.001647 | 0.112045838  | 0.125 | 0.103 | 1 | 1.1 |
| ARFGEF3    | 0.001689 | 0.241022675  | 0.243 | 0.224 | 1 | 1.1 |
| FNDC3B     | 0.001733 | 0.170722856  | 0.707 | 0.751 | 1 | 1.1 |
| RP1-221C1  | 0.001751 | 0.118873395  | 0.075 | 0.058 | 1 | 1.1 |

|           |          |              |       |       |   |     |
|-----------|----------|--------------|-------|-------|---|-----|
| PFKFB3    | 0.001937 | 0.117324313  | 0.089 | 0.071 | 1 | 1.1 |
| FAM46A    | 0.002116 | 0.142416083  | 0.126 | 0.105 | 1 | 1.1 |
| MACC1     | 0.002172 | 0.209699433  | 0.414 | 0.4   | 1 | 1.1 |
| SNHG12    | 0.002172 | 0.115918244  | 0.08  | 0.063 | 1 | 1.1 |
| LYRM4     | 0.002183 | 0.146323203  | 0.189 | 0.168 | 1 | 1.1 |
| BCL6      | 0.002186 | 0.209447271  | 0.349 | 0.338 | 1 | 1.1 |
| TXN       | 0.002237 | -0.162414836 | 0.674 | 0.719 | 1 | 1.1 |
| GALM      | 0.002257 | 0.117659148  | 0.087 | 0.069 | 1 | 1.1 |
| USP9X     | 0.002357 | 0.20658819   | 0.334 | 0.326 | 1 | 1.1 |
| TMEM123   | 0.002368 | 0.237704515  | 0.419 | 0.425 | 1 | 1.1 |
| MAP3K8    | 0.00238  | 0.251087908  | 0.29  | 0.277 | 1 | 1.1 |
| CTA-293F1 | 0.002396 | 0.253155538  | 0.139 | 0.121 | 1 | 1.1 |
| ATP11B    | 0.002497 | 0.224596449  | 0.21  | 0.192 | 1 | 1.1 |
| ZNF281    | 0.002498 | 0.112543383  | 0.105 | 0.086 | 1 | 1.1 |
| MGEA5     | 0.002543 | 0.188466255  | 0.401 | 0.4   | 1 | 1.1 |
| TM4SF1-AS | 0.002573 | 0.125532493  | 0.11  | 0.091 | 1 | 1.1 |
| RAPGEF1   | 0.00263  | 0.132175083  | 0.145 | 0.125 | 1 | 1.1 |
| SASH1     | 0.002634 | 0.207086131  | 0.327 | 0.313 | 1 | 1.1 |
| LARS      | 0.002708 | 0.174874704  | 0.256 | 0.238 | 1 | 1.1 |
| RDX       | 0.002765 | 0.211279466  | 0.229 | 0.211 | 1 | 1.1 |
| MRPL22    | 0.002833 | 0.168615303  | 0.271 | 0.255 | 1 | 1.1 |
| RNF114    | 0.003161 | 0.161562159  | 0.163 | 0.143 | 1 | 1.1 |
| ATP6V1H   | 0.003183 | 0.144318951  | 0.111 | 0.093 | 1 | 1.1 |
| MCTS1     | 0.003266 | 0.175043975  | 0.298 | 0.287 | 1 | 1.1 |
| ARHGAP10  | 0.003351 | 0.175633107  | 0.15  | 0.13  | 1 | 1.1 |
| RP5-896L1 | 0.003465 | 0.173195114  | 0.355 | 0.348 | 1 | 1.1 |
| CLIP1     | 0.003711 | 0.149789397  | 0.388 | 0.382 | 1 | 1.1 |
| KAT6A     | 0.003768 | 0.196066337  | 0.262 | 0.244 | 1 | 1.1 |
| FAXC      | 0.003813 | 0.110945543  | 0.043 | 0.031 | 1 | 1.1 |
| MICA      | 0.00394  | 0.15859148   | 0.148 | 0.129 | 1 | 1.1 |
| NPTN      | 0.003998 | 0.165803245  | 0.133 | 0.114 | 1 | 1.1 |
| DNAJB1    | 0.004124 | 0.28865178   | 0.116 | 0.1   | 1 | 1.1 |
| DHX15     | 0.004232 | 0.206459127  | 0.221 | 0.205 | 1 | 1.1 |
| GRHL1     | 0.004285 | 0.181215087  | 0.267 | 0.25  | 1 | 1.1 |
| CREBRF    | 0.004388 | 0.172101633  | 0.233 | 0.214 | 1 | 1.1 |
| CSDE1     | 0.004469 | 0.127097928  | 0.569 | 0.59  | 1 | 1.1 |
| NEK7      | 0.004576 | 0.204073254  | 0.215 | 0.197 | 1 | 1.1 |
| RBMS2     | 0.004808 | 0.1777081    | 0.166 | 0.148 | 1 | 1.1 |
| POGZ      | 0.004855 | 0.168571114  | 0.287 | 0.273 | 1 | 1.1 |
| RCAN3     | 0.004859 | 0.226908876  | 0.163 | 0.197 | 1 | 1.1 |
| SRSF10    | 0.004935 | 0.125590509  | 0.159 | 0.139 | 1 | 1.1 |
| DYRK3     | 0.005561 | 0.138846646  | 0.087 | 0.071 | 1 | 1.1 |
| CSNK2A1   | 0.005564 | 0.138732836  | 0.214 | 0.196 | 1 | 1.1 |
| HIVEP2    | 0.00564  | 0.291553067  | 0.367 | 0.367 | 1 | 1.1 |
| NDUFB1    | 0.006006 | 0.191499071  | 0.354 | 0.346 | 1 | 1.1 |
| NMD3      | 0.006071 | 0.130861676  | 0.178 | 0.159 | 1 | 1.1 |
| RP11-795H | 0.00613  | 0.212246832  | 0.448 | 0.438 | 1 | 1.1 |

|            |          |              |       |       |   |     |
|------------|----------|--------------|-------|-------|---|-----|
| EGOT       | 0.006142 | 0.119475444  | 0.084 | 0.069 | 1 | 1.1 |
| OTULIN     | 0.00665  | 0.130563371  | 0.075 | 0.06  | 1 | 1.1 |
| CETN2      | 0.006717 | 0.176600018  | 0.148 | 0.13  | 1 | 1.1 |
| FASTKD2    | 0.006831 | 0.158175717  | 0.115 | 0.099 | 1 | 1.1 |
| MYNN       | 0.006919 | 0.115234141  | 0.098 | 0.082 | 1 | 1.1 |
| MRPS21     | 0.00703  | 0.166032018  | 0.506 | 0.525 | 1 | 1.1 |
| HIF1A-AS2  | 0.007229 | 0.165556119  | 0.158 | 0.139 | 1 | 1.1 |
| KIF15      | 0.007434 | 0.10414174   | 0.024 | 0.015 | 1 | 1.1 |
| MYSM1      | 0.007447 | 0.134177413  | 0.143 | 0.125 | 1 | 1.1 |
| ITGB5-AS1  | 0.00748  | 0.210347598  | 0.049 | 0.037 | 1 | 1.1 |
| LYRM5      | 0.007748 | 0.118416587  | 0.124 | 0.106 | 1 | 1.1 |
| WDR26      | 0.007773 | 0.173460877  | 0.222 | 0.205 | 1 | 1.1 |
| KIDINS220  | 0.007873 | 0.12804146   | 0.191 | 0.173 | 1 | 1.1 |
| SESTD1     | 0.007874 | 0.152785298  | 0.603 | 0.631 | 1 | 1.1 |
| RP1-31316. | 0.007986 | 0.137873477  | 0.074 | 0.06  | 1 | 1.1 |
| IRF1       | 0.008071 | 0.151345962  | 0.162 | 0.143 | 1 | 1.1 |
| PPP2R5E    | 0.008247 | 0.253569917  | 0.279 | 0.273 | 1 | 1.1 |
| ELMO2      | 0.008387 | 0.124051336  | 0.075 | 0.06  | 1 | 1.1 |
| YWHAH      | 0.009022 | 0.139775257  | 0.231 | 0.214 | 1 | 1.1 |
| RPL35      | 0.00929  | -0.199111195 | 0.292 | 0.321 | 1 | 1.1 |
| EIF2S1     | 0.009342 | 0.150868241  | 0.272 | 0.257 | 1 | 1.1 |
| EPB41L4B   | 0.009475 | 0.15560706   | 0.125 | 0.108 | 1 | 1.1 |
| RALA       | 0.00956  | 0.173818726  | 0.187 | 0.17  | 1 | 1.1 |
| ARHGEF26   | 0.009985 | 0.189958053  | 0.083 | 0.069 | 1 | 1.1 |
| GRB7       | 0.010021 | 0.109262097  | 0.112 | 0.095 | 1 | 1.1 |
| TMEM27     | 0.010334 | 0.101987518  | 0.055 | 0.043 | 1 | 1.1 |
| MIR99AHG   | 0.010397 | 0.107019855  | 0.088 | 0.073 | 1 | 1.1 |
| SERPINB9   | 0.010484 | 0.558157483  | 0.17  | 0.154 | 1 | 1.1 |
| AC090498.  | 0.010734 | 0.182350323  | 0.384 | 0.392 | 1 | 1.1 |
| PELI1      | 0.011079 | 0.231244301  | 0.447 | 0.457 | 1 | 1.1 |
| SNU13      | 0.01134  | 0.166395746  | 0.475 | 0.485 | 1 | 1.1 |
| TXLNG      | 0.011491 | 0.147071737  | 0.123 | 0.107 | 1 | 1.1 |
| GTF2F2     | 0.011592 | 0.120574446  | 0.157 | 0.14  | 1 | 1.1 |
| TCEA1      | 0.011774 | 0.133286079  | 0.115 | 0.099 | 1 | 1.1 |
| NR1D2      | 0.012027 | 0.148363921  | 0.183 | 0.167 | 1 | 1.1 |
| FAM69A     | 0.012172 | 0.106788811  | 0.071 | 0.058 | 1 | 1.1 |
| SMR3B      | 0.012743 | 0.143444955  | 0.01  | 0.006 | 1 | 1.1 |
| VEGFA      | 0.012876 | 0.179848624  | 0.232 | 0.217 | 1 | 1.1 |
| SEMA3E     | 0.014102 | 0.111770944  | 0.082 | 0.068 | 1 | 1.1 |
| ITGA6      | 0.014113 | 0.106638241  | 0.118 | 0.101 | 1 | 1.1 |
| MPP5       | 0.014398 | 0.201779442  | 0.251 | 0.239 | 1 | 1.1 |
| ALDH7A1    | 0.014569 | 0.125025541  | 0.11  | 0.095 | 1 | 1.1 |
| RNF128     | 0.01466  | 0.163642129  | 0.108 | 0.094 | 1 | 1.1 |
| MTDH       | 0.014838 | 0.167818823  | 0.331 | 0.324 | 1 | 1.1 |
| RP1-292B1  | 0.014982 | 0.132715101  | 0.257 | 0.244 | 1 | 1.1 |
| TPM4       | 0.015454 | -0.106185451 | 0.459 | 0.511 | 1 | 1.1 |
| SLC25A36   | 0.015614 | 0.114023222  | 0.187 | 0.17  | 1 | 1.1 |

|            |          |              |       |       |   |     |
|------------|----------|--------------|-------|-------|---|-----|
| CDC73      | 0.01566  | 0.137639367  | 0.187 | 0.172 | 1 | 1.1 |
| RPL13A     | 0.01597  | -0.170320983 | 0.506 | 0.549 | 1 | 1.1 |
| SLAIN2     | 0.016135 | 0.106776561  | 0.105 | 0.09  | 1 | 1.1 |
| WDR61      | 0.016534 | 0.14132134   | 0.115 | 0.101 | 1 | 1.1 |
| HIST1H2BC  | 0.016633 | 0.164833737  | 0.249 | 0.293 | 1 | 1.1 |
| HSPA1A     | 0.016726 | 0.172965669  | 0.041 | 0.054 | 1 | 1.1 |
| TMEM167E   | 0.017565 | 0.105559421  | 0.078 | 0.065 | 1 | 1.1 |
| NUS1       | 0.017759 | 0.149643613  | 0.129 | 0.115 | 1 | 1.1 |
| AHDC1      | 0.018523 | 0.122953628  | 0.104 | 0.089 | 1 | 1.1 |
| DHX9       | 0.019193 | 0.180841926  | 0.2   | 0.188 | 1 | 1.1 |
| HINT1      | 0.019472 | 0.171173725  | 0.627 | 0.679 | 1 | 1.1 |
| TRIM2      | 0.020175 | 0.208653392  | 0.307 | 0.302 | 1 | 1.1 |
| PRRC1      | 0.020344 | 0.105897475  | 0.115 | 0.1   | 1 | 1.1 |
| OTUD4      | 0.021795 | 0.130161118  | 0.142 | 0.127 | 1 | 1.1 |
| RP11-840I1 | 0.022114 | 0.120499838  | 0.103 | 0.089 | 1 | 1.1 |
| ATP5H      | 0.023601 | 0.163226238  | 0.374 | 0.378 | 1 | 1.1 |
| GADD45B    | 0.024139 | 0.190099763  | 0.062 | 0.051 | 1 | 1.1 |
| RLIM       | 0.024336 | 0.100234851  | 0.082 | 0.07  | 1 | 1.1 |
| RCC1       | 0.024521 | 0.209313876  | 0.351 | 0.357 | 1 | 1.1 |
| BANF1      | 0.024639 | 0.166389912  | 0.218 | 0.209 | 1 | 1.1 |
| ZNF207     | 0.024874 | 0.154379096  | 0.474 | 0.491 | 1 | 1.1 |
| URB1       | 0.025448 | 0.13300016   | 0.049 | 0.062 | 1 | 1.1 |
| ACBD3      | 0.025642 | 0.147267325  | 0.162 | 0.147 | 1 | 1.1 |
| PTBP2      | 0.026372 | 0.207578862  | 0.441 | 0.461 | 1 | 1.1 |
| EWSR1      | 0.026768 | 0.102989379  | 0.133 | 0.118 | 1 | 1.1 |
| GSTK1      | 0.02687  | 0.100810689  | 0.088 | 0.075 | 1 | 1.1 |
| CAB39L     | 0.027432 | 0.24182439   | 0.123 | 0.11  | 1 | 1.1 |
| WAPL       | 0.027686 | 0.164252995  | 0.182 | 0.17  | 1 | 1.1 |
| MTMR1      | 0.029134 | 0.14309315   | 0.15  | 0.137 | 1 | 1.1 |
| ETF1       | 0.03064  | 0.128503991  | 0.156 | 0.143 | 1 | 1.1 |
| RAB3IP     | 0.03113  | 0.139342546  | 0.129 | 0.116 | 1 | 1.1 |
| ZBTB43     | 0.032923 | 0.135841264  | 0.169 | 0.156 | 1 | 1.1 |
| YY1        | 0.033141 | 0.135321335  | 0.18  | 0.167 | 1 | 1.1 |
| TNFAIP3    | 0.034076 | 0.23565921   | 0.261 | 0.251 | 1 | 1.1 |
| TMA7       | 0.035631 | 0.126711729  | 0.556 | 0.596 | 1 | 1.1 |
| RP11-580I1 | 0.035795 | 0.112136338  | 0.069 | 0.058 | 1 | 1.1 |
| RASGEF1B   | 0.036426 | 0.115767601  | 0.877 | 0.901 | 1 | 1.1 |
| PPP3CA     | 0.037256 | 0.319040686  | 0.399 | 0.418 | 1 | 1.1 |
| YTHDF3     | 0.039413 | 0.109804629  | 0.148 | 0.134 | 1 | 1.1 |
| SNX9       | 0.039443 | 0.192882762  | 0.439 | 0.455 | 1 | 1.1 |
| SET        | 0.039781 | 0.104646569  | 0.477 | 0.49  | 1 | 1.1 |
| ANKRD28    | 0.041549 | 0.281520274  | 0.303 | 0.306 | 1 | 1.1 |
| EFR3A      | 0.04207  | 0.176103232  | 0.173 | 0.162 | 1 | 1.1 |
| DCP1A      | 0.042505 | 0.165168883  | 0.263 | 0.257 | 1 | 1.1 |
| BAG4       | 0.042975 | 0.101209989  | 0.057 | 0.047 | 1 | 1.1 |
| NCOR1      | 0.043444 | 0.176040014  | 0.356 | 0.365 | 1 | 1.1 |
| CCT8       | 0.0439   | 0.146064786  | 0.376 | 0.381 | 1 | 1.1 |

|           |          |              |       |       |   |     |
|-----------|----------|--------------|-------|-------|---|-----|
| GPS2      | 0.044068 | 0.120139825  | 0.123 | 0.111 | 1 | 1.1 |
| CDK17     | 0.044093 | 0.11789244   | 0.148 | 0.135 | 1 | 1.1 |
| SRP72     | 0.044699 | 0.124596898  | 0.192 | 0.182 | 1 | 1.1 |
| TMSB4X    | 0.044993 | 0.166714307  | 0.886 | 0.89  | 1 | 1.1 |
| SF3B1     | 0.050303 | 0.154429432  | 0.353 | 0.36  | 1 | 1.1 |
| INTS6-AS1 | 0.050857 | 0.118978363  | 0.178 | 0.168 | 1 | 1.1 |
| PUM3      | 0.051215 | 0.165855362  | 0.239 | 0.233 | 1 | 1.1 |
| PSME1     | 0.051823 | 0.131515176  | 0.207 | 0.197 | 1 | 1.1 |
| PGM3      | 0.052644 | 0.102010316  | 0.12  | 0.108 | 1 | 1.1 |
| MAP3K14   | 0.057724 | 0.188070425  | 0.083 | 0.073 | 1 | 1.1 |
| LSM14A    | 0.061121 | 0.183389515  | 0.345 | 0.352 | 1 | 1.1 |
| WDFY2     | 0.061193 | 0.179767499  | 0.2   | 0.194 | 1 | 1.1 |
| TP53BP2   | 0.063384 | 0.169813487  | 0.166 | 0.156 | 1 | 1.1 |
| PEAK1     | 0.063554 | 0.247656783  | 0.187 | 0.178 | 1 | 1.1 |
| MT-CO1    | 0.063628 | -0.138981015 | 0.996 | 0.986 | 1 | 1.1 |
| RIF1      | 0.064542 | 0.153043232  | 0.327 | 0.327 | 1 | 1.1 |
| APTR      | 0.065632 | 0.129118155  | 0.089 | 0.079 | 1 | 1.1 |
| CXCL2     | 0.06607  | 0.266243091  | 0.235 | 0.266 | 1 | 1.1 |
| FBXO3     | 0.06653  | 0.124015113  | 0.107 | 0.096 | 1 | 1.1 |
| STK38     | 0.067948 | 0.16707871   | 0.257 | 0.252 | 1 | 1.1 |
| GPR107    | 0.068144 | 0.117324246  | 0.161 | 0.15  | 1 | 1.1 |
| AC074391. | 0.070327 | 0.197433322  | 0.048 | 0.058 | 1 | 1.1 |
| TM9SF2    | 0.071987 | 0.19531634   | 0.194 | 0.187 | 1 | 1.1 |
| PCBP2     | 0.07506  | 0.120753386  | 0.572 | 0.62  | 1 | 1.1 |
| NT5C3A    | 0.075934 | 0.174109801  | 0.198 | 0.19  | 1 | 1.1 |
| LRRFIP1   | 0.077152 | 0.162584953  | 0.501 | 0.521 | 1 | 1.1 |
| COPB1     | 0.077455 | 0.143450763  | 0.218 | 0.211 | 1 | 1.1 |
| LHFPL3    | 0.080404 | 0.13837629   | 0.309 | 0.311 | 1 | 1.1 |
| SH2B1     | 0.084575 | 0.14254673   | 0.019 | 0.026 | 1 | 1.1 |
| TNIP1     | 0.085074 | 0.122375424  | 0.185 | 0.175 | 1 | 1.1 |
| FAM204A   | 0.086088 | 0.165461542  | 0.216 | 0.211 | 1 | 1.1 |
| MDH1      | 0.086183 | 0.12690932   | 0.358 | 0.364 | 1 | 1.1 |
| TMED10    | 0.089567 | 0.128611739  | 0.313 | 0.316 | 1 | 1.1 |
| HDAC2     | 0.090604 | 0.13615563   | 0.213 | 0.208 | 1 | 1.1 |
| VDAC1     | 0.092548 | 0.111882227  | 0.223 | 0.215 | 1 | 1.1 |
| GPAT3     | 0.094549 | 0.119518221  | 0.092 | 0.082 | 1 | 1.1 |
| TTC19     | 0.101878 | 0.159615011  | 0.215 | 0.21  | 1 | 1.1 |
| SUMO1     | 0.105024 | 0.110490014  | 0.515 | 0.538 | 1 | 1.1 |
| CDA       | 0.10919  | 0.135620244  | 0.018 | 0.013 | 1 | 1.1 |
| TSPAN6    | 0.113085 | 0.113376145  | 0.144 | 0.135 | 1 | 1.1 |
| MGST2     | 0.114161 | 0.147212618  | 0.177 | 0.17  | 1 | 1.1 |
| BBC3      | 0.116355 | 0.121955601  | 0.074 | 0.066 | 1 | 1.1 |
| FBXO11    | 0.116842 | 0.140293319  | 0.38  | 0.388 | 1 | 1.1 |
| RHOA      | 0.117653 | 0.204625658  | 0.404 | 0.427 | 1 | 1.1 |
| ANXA11    | 0.118417 | 0.131468233  | 0.248 | 0.245 | 1 | 1.1 |
| NAP1L1    | 0.120352 | 0.111965808  | 0.434 | 0.447 | 1 | 1.1 |
| SLC5A11   | 0.123499 | 0.112860209  | 0.025 | 0.031 | 1 | 1.1 |

|           |          |             |       |       |   |     |
|-----------|----------|-------------|-------|-------|---|-----|
| TCERG1    | 0.123835 | 0.102527265 | 0.17  | 0.162 | 1 | 1.1 |
| C12orf60  | 0.127502 | 0.130346315 | 0.102 | 0.093 | 1 | 1.1 |
| FAS       | 0.131294 | 0.132353575 | 0.201 | 0.194 | 1 | 1.1 |
| GRAMD3    | 0.133456 | 0.224070919 | 0.361 | 0.378 | 1 | 1.1 |
| DAD1      | 0.135516 | 0.11601293  | 0.501 | 0.524 | 1 | 1.1 |
| CTC1      | 0.138234 | 0.118147436 | 0.052 | 0.045 | 1 | 1.1 |
| FAT1      | 0.140717 | 0.115946135 | 0.147 | 0.139 | 1 | 1.1 |
| POLR2G    | 0.150146 | 0.128543843 | 0.178 | 0.172 | 1 | 1.1 |
| VPS26A    | 0.151762 | 0.133664838 | 0.17  | 0.164 | 1 | 1.1 |
| DDX6      | 0.152057 | 0.14966701  | 0.238 | 0.236 | 1 | 1.1 |
| EIF3J     | 0.155953 | 0.129094891 | 0.156 | 0.15  | 1 | 1.1 |
| MRPL45    | 0.169364 | 0.111653481 | 0.213 | 0.21  | 1 | 1.1 |
| CA12      | 0.180431 | 0.163333354 | 0.237 | 0.231 | 1 | 1.1 |
| GTF2I     | 0.182228 | 0.198631084 | 0.413 | 0.443 | 1 | 1.1 |
| COPS4     | 0.183275 | 0.10673552  | 0.136 | 0.129 | 1 | 1.1 |
| AP000487. | 0.183595 | 0.159097999 | 0.208 | 0.203 | 1 | 1.1 |
| NOTCH2    | 0.191895 | 0.109428956 | 0.174 | 0.196 | 1 | 1.1 |
| VPS29     | 0.200534 | 0.136312981 | 0.381 | 0.392 | 1 | 1.1 |
| CLEC2B    | 0.20174  | 0.100584412 | 0.106 | 0.119 | 1 | 1.1 |
| HCAR2     | 0.20698  | 0.362379063 | 0.202 | 0.201 | 1 | 1.1 |
| BNIP3L    | 0.209243 | 0.122277317 | 0.306 | 0.308 | 1 | 1.1 |
| PPIL4     | 0.213015 | 0.122824496 | 0.162 | 0.157 | 1 | 1.1 |
| TLE1      | 0.22556  | 0.145787438 | 0.229 | 0.227 | 1 | 1.1 |
| LRRC23    | 0.227635 | 0.19367814  | 0.093 | 0.104 | 1 | 1.1 |
| CLINT1    | 0.233901 | 0.204215591 | 0.353 | 0.374 | 1 | 1.1 |
| STK39     | 0.23416  | 0.382342545 | 0.135 | 0.129 | 1 | 1.1 |
| LMAN1     | 0.236251 | 0.1092495   | 0.205 | 0.202 | 1 | 1.1 |
| BZW2      | 0.237847 | 0.13021341  | 0.118 | 0.111 | 1 | 1.1 |
| TBC1D23   | 0.240125 | 0.125737113 | 0.16  | 0.156 | 1 | 1.1 |
| USP3      | 0.240554 | 0.128821728 | 0.227 | 0.227 | 1 | 1.1 |
| TOX4      | 0.245313 | 0.141742744 | 0.218 | 0.22  | 1 | 1.1 |
| F11R      | 0.248248 | 0.102144651 | 0.178 | 0.175 | 1 | 1.1 |
| PTPN12    | 0.270249 | 0.144105566 | 0.409 | 0.432 | 1 | 1.1 |
| BCLAF1    | 0.280202 | 0.111765201 | 0.37  | 0.384 | 1 | 1.1 |
| TMED2     | 0.28067  | 0.101610547 | 0.158 | 0.154 | 1 | 1.1 |
| STMN1     | 0.280709 | 0.130795827 | 0.199 | 0.193 | 1 | 1.1 |
| PRSS8     | 0.289335 | 0.307866109 | 0.065 | 0.06  | 1 | 1.1 |
| RAP1B     | 0.291396 | 0.134551975 | 0.402 | 0.417 | 1 | 1.1 |
| MED21     | 0.29258  | 0.1289671   | 0.219 | 0.245 | 1 | 1.1 |
| YES1      | 0.294898 | 0.101188847 | 0.211 | 0.209 | 1 | 1.1 |
| DUSP16    | 0.294901 | 0.139003986 | 0.252 | 0.258 | 1 | 1.1 |
| HNRNPK    | 0.296121 | 0.102316988 | 0.455 | 0.48  | 1 | 1.1 |
| ABTB2     | 0.296932 | 0.102300507 | 0.226 | 0.246 | 1 | 1.1 |
| MUCL1     | 0.301653 | 0.148971271 | 0.155 | 0.152 | 1 | 1.1 |
| PCNX      | 0.302399 | 0.103503324 | 0.178 | 0.197 | 1 | 1.1 |
| KPNB1     | 0.306237 | 0.157792994 | 0.425 | 0.454 | 1 | 1.1 |
| ITGA2     | 0.313868 | 0.128476244 | 0.453 | 0.465 | 1 | 1.1 |



|            |          |              |       |       |   |     |
|------------|----------|--------------|-------|-------|---|-----|
| ANKRD12    | 0.313909 | 0.224285492  | 0.52  | 0.579 | 1 | 1.1 |
| BTBD7      | 0.314053 | 0.12357202   | 0.147 | 0.144 | 1 | 1.1 |
| KRT8       | 0.316744 | 0.221270756  | 0.202 | 0.2   | 1 | 1.1 |
| JAK1       | 0.326931 | 0.13962429   | 0.329 | 0.344 | 1 | 1.1 |
| MON2       | 0.346021 | 0.107884599  | 0.238 | 0.264 | 1 | 1.1 |
| PRPF40A    | 0.355481 | 0.113915892  | 0.176 | 0.175 | 1 | 1.1 |
| SRGAP1     | 0.359249 | 0.123159347  | 0.301 | 0.33  | 1 | 1.1 |
| TET2       | 0.36238  | 0.155569057  | 0.21  | 0.212 | 1 | 1.1 |
| DIP2B      | 0.373224 | 0.156118927  | 0.313 | 0.327 | 1 | 1.1 |
| NFKBIA     | 0.37434  | 0.212219402  | 0.563 | 0.645 | 1 | 1.1 |
| EIF1B      | 0.378853 | 0.112309164  | 0.277 | 0.283 | 1 | 1.1 |
| ALKBH1     | 0.381726 | 0.149609425  | 0.037 | 0.042 | 1 | 1.1 |
| SNX8       | 0.384837 | 0.122414729  | 0.081 | 0.077 | 1 | 1.1 |
| ELAVL1     | 0.386716 | 0.148405035  | 0.146 | 0.158 | 1 | 1.1 |
| FABP7      | 0.388434 | -0.869767756 | 0.222 | 0.221 | 1 | 1.1 |
| CHCHD2     | 0.390908 | 0.102805155  | 0.235 | 0.233 | 1 | 1.1 |
| MAPK6      | 0.390932 | 0.140698167  | 0.213 | 0.214 | 1 | 1.1 |
| HNRNPH1    | 0.392667 | 0.132968097  | 0.403 | 0.419 | 1 | 1.1 |
| BCAS2      | 0.400594 | 0.151341257  | 0.231 | 0.236 | 1 | 1.1 |
| EPCAM      | 0.417878 | 0.119198     | 0.194 | 0.195 | 1 | 1.1 |
| MRPL48     | 0.422371 | 0.101287172  | 0.118 | 0.116 | 1 | 1.1 |
| NBPF14     | 0.435346 | 0.108487165  | 0.112 | 0.11  | 1 | 1.1 |
| STX12      | 0.436243 | 0.148053539  | 0.414 | 0.461 | 1 | 1.1 |
| CTTNBP2N1  | 0.456487 | 0.113975036  | 0.264 | 0.29  | 1 | 1.1 |
| LAPTM4A    | 0.457037 | 0.1081942    | 0.237 | 0.238 | 1 | 1.1 |
| C14orf166  | 0.463934 | 0.10255029   | 0.241 | 0.246 | 1 | 1.1 |
| EIF3D      | 0.519563 | 0.102088516  | 0.393 | 0.416 | 1 | 1.1 |
| DENND4A    | 0.521088 | 0.187162685  | 0.497 | 0.529 | 1 | 1.1 |
| PPHLN1     | 0.521456 | 0.146509699  | 0.381 | 0.406 | 1 | 1.1 |
| MAP3K2     | 0.52251  | 0.104132772  | 0.181 | 0.184 | 1 | 1.1 |
| ZNF267     | 0.527283 | 0.120858842  | 0.175 | 0.177 | 1 | 1.1 |
| ARRDC3     | 0.535787 | 0.192941632  | 0.596 | 0.669 | 1 | 1.1 |
| TAOK3      | 0.536465 | 0.101272129  | 0.385 | 0.426 | 1 | 1.1 |
| SLC27A4    | 0.541282 | 0.113742164  | 0.557 | 0.566 | 1 | 1.1 |
| PCNP       | 0.543112 | 0.113611482  | 0.356 | 0.376 | 1 | 1.1 |
| PHACTR4    | 0.546527 | 0.126759195  | 0.368 | 0.405 | 1 | 1.1 |
| COL6A2     | 0.552858 | 0.124298228  | 0.142 | 0.141 | 1 | 1.1 |
| TNKS2      | 0.558467 | 0.121255473  | 0.253 | 0.261 | 1 | 1.1 |
| GBE1       | 0.561983 | 0.199589311  | 0.384 | 0.403 | 1 | 1.1 |
| C5orf56    | 0.576679 | 0.11489465   | 0.125 | 0.125 | 1 | 1.1 |
| GNL3       | 0.591599 | 0.139879974  | 0.27  | 0.279 | 1 | 1.1 |
| TFCP2L1    | 0.607399 | 0.153468507  | 0.152 | 0.151 | 1 | 1.1 |
| RP11-445F1 | 0.612061 | 0.147180819  | 0.023 | 0.021 | 1 | 1.1 |
| ATP5F1     | 0.619328 | 0.115968147  | 0.441 | 0.477 | 1 | 1.1 |
| DSG3       | 0.620336 | 0.336819672  | 0.07  | 0.069 | 1 | 1.1 |
| BBOX1      | 0.63138  | 0.110205126  | 0.251 | 0.27  | 1 | 1.1 |
| WRN        | 0.650416 | 0.126125555  | 0.184 | 0.188 | 1 | 1.1 |

|           |           |              |       |       |           |     |
|-----------|-----------|--------------|-------|-------|-----------|-----|
| FBXW7     | 0.652792  | 0.105638223  | 0.303 | 0.329 | 1         | 1.1 |
| SCGB2A2   | 0.668622  | 0.702690055  | 0.18  | 0.193 | 1         | 1.1 |
| ACSS1     | 0.682044  | 0.155780295  | 0.015 | 0.016 | 1         | 1.1 |
| UBA6      | 0.682724  | 0.11626789   | 0.314 | 0.343 | 1         | 1.1 |
| EXT1      | 0.695604  | 0.19006375   | 0.531 | 0.574 | 1         | 1.1 |
| COPA      | 0.695811  | 0.132977702  | 0.322 | 0.357 | 1         | 1.1 |
| LSM3      | 0.710271  | 0.112415801  | 0.306 | 0.326 | 1         | 1.1 |
| POLR2B    | 0.712998  | 0.104522605  | 0.204 | 0.21  | 1         | 1.1 |
| LAMC1     | 0.721584  | 0.134234099  | 0.253 | 0.271 | 1         | 1.1 |
| CLK1      | 0.721665  | 0.181325236  | 0.376 | 0.397 | 1         | 1.1 |
| GNA12     | 0.730879  | 0.146253996  | 0.341 | 0.364 | 1         | 1.1 |
| HIF1A     | 0.732749  | 0.233128781  | 0.371 | 0.399 | 1         | 1.1 |
| ZNF462    | 0.737648  | 0.111320066  | 0.333 | 0.354 | 1         | 1.1 |
| TMF1      | 0.738628  | 0.107415547  | 0.183 | 0.193 | 1         | 1.1 |
| ZMAT2     | 0.769973  | 0.123068222  | 0.214 | 0.23  | 1         | 1.1 |
| DPP6      | 0.782013  | 0.153030364  | 0.155 | 0.166 | 1         | 1.1 |
| MPDZ      | 0.792176  | 0.118939761  | 0.176 | 0.181 | 1         | 1.1 |
| PDE4D     | 0.806491  | 0.130882568  | 0.105 | 0.106 | 1         | 1.1 |
| RIC3      | 0.811539  | 0.231431147  | 0.086 | 0.091 | 1         | 1.1 |
| CELF1     | 0.816647  | 0.108603146  | 0.326 | 0.347 | 1         | 1.1 |
| TRPC4AP   | 0.824163  | 0.128303628  | 0.218 | 0.233 | 1         | 1.1 |
| MET       | 0.833323  | 0.250924781  | 0.326 | 0.362 | 1         | 1.1 |
| AKT3      | 0.848736  | 0.253248967  | 0.432 | 0.492 | 1         | 1.1 |
| SMCHD1    | 0.857323  | 0.158640267  | 0.276 | 0.295 | 1         | 1.1 |
| PROSER2   | 0.885895  | 0.122026377  | 0.068 | 0.069 | 1         | 1.1 |
| TJP1      | 0.909544  | 0.163594593  | 0.367 | 0.398 | 1         | 1.1 |
| ERRFI1    | 0.918756  | 0.100973865  | 0.574 | 0.614 | 1         | 1.1 |
| TCP1      | 0.955922  | 0.11772151   | 0.222 | 0.235 | 1         | 1.1 |
| HECTD1    | 0.979761  | 0.222120912  | 0.25  | 0.269 | 1         | 1.1 |
| UBE2B     | 0.981287  | 0.101425285  | 0.236 | 0.251 | 1         | 1.1 |
| HADHB     | 0.985247  | 0.108625593  | 0.277 | 0.295 | 1         | 1.1 |
| MYL12A    | 9.87E-259 | 1.035597972  | 0.945 | 0.834 | 2.38E-254 | 1.2 |
| ITGA2     | 7.93E-242 | 1.248962197  | 0.737 | 0.384 | 1.91E-237 | 1.2 |
| CLDN1     | 3.17E-207 | 1.399101597  | 0.658 | 0.344 | 7.64E-203 | 1.2 |
| MYL6      | 2.17E-183 | 0.769170093  | 0.972 | 0.929 | 5.22E-179 | 1.2 |
| ANXA1     | 9.24E-183 | 1.035134092  | 0.974 | 0.887 | 2.23E-178 | 1.2 |
| ANXA2     | 2.17E-178 | 0.807391587  | 0.973 | 0.904 | 5.24E-174 | 1.2 |
| TRPS1     | 1.82E-147 | -1.034979721 | 0.523 | 0.773 | 4.39E-143 | 1.2 |
| RARRES1   | 1.89E-146 | -1.476701344 | 0.16  | 0.468 | 4.55E-142 | 1.2 |
| GLIPR1    | 1.27E-145 | 1.015703399  | 0.557 | 0.287 | 3.06E-141 | 1.2 |
| LIPH      | 1.00E-141 | 1.247614458  | 0.657 | 0.416 | 2.42E-137 | 1.2 |
| RAB11FIP1 | 2.52E-137 | 0.927244858  | 0.705 | 0.463 | 6.07E-133 | 1.2 |
| USP53     | 6.04E-137 | 0.831227697  | 0.826 | 0.624 | 1.46E-132 | 1.2 |
| DBI       | 5.29E-135 | -0.952759478 | 0.498 | 0.749 | 1.28E-130 | 1.2 |
| CALD1     | 9.08E-134 | 0.990246892  | 0.77  | 0.55  | 2.19E-129 | 1.2 |
| CHPT1     | 1.63E-128 | -1.319686541 | 0.163 | 0.451 | 3.93E-124 | 1.2 |
| MYL12B    | 5.28E-122 | 0.773230559  | 0.834 | 0.681 | 1.27E-117 | 1.2 |

|           |           |              |       |       |           |     |
|-----------|-----------|--------------|-------|-------|-----------|-----|
| PIK3R1    | 3.73E-120 | -1.12839214  | 0.065 | 0.324 | 8.99E-116 | 1.2 |
| ADAMTS9   | 4.10E-120 | 1.140898773  | 0.621 | 0.385 | 9.89E-116 | 1.2 |
| MACC1     | 1.90E-115 | 0.933590867  | 0.595 | 0.35  | 4.59E-111 | 1.2 |
| ELF5      | 2.72E-115 | -0.935130349 | 0.093 | 0.356 | 6.55E-111 | 1.2 |
| BCL2A1    | 4.07E-113 | 1.092037279  | 0.314 | 0.114 | 9.82E-109 | 1.2 |
| MYO5B     | 2.39E-111 | 0.615299026  | 0.782 | 0.546 | 5.76E-107 | 1.2 |
| PLAUR     | 2.76E-111 | 0.918281086  | 0.347 | 0.139 | 6.67E-107 | 1.2 |
| TACSTD2   | 3.11E-111 | 0.821849502  | 0.832 | 0.689 | 7.51E-107 | 1.2 |
| LTF       | 9.49E-111 | -1.220727376 | 0.52  | 0.707 | 2.29E-106 | 1.2 |
| KYNU      | 1.86E-107 | -1.609979996 | 0.182 | 0.436 | 4.48E-103 | 1.2 |
| EVA1C     | 4.59E-107 | -1.034258478 | 0.248 | 0.506 | 1.11E-102 | 1.2 |
| PLEKHS1   | 6.92E-105 | -0.934399801 | 0.073 | 0.315 | 1.67E-100 | 1.2 |
| ARHGAP26  | 3.79E-104 | -0.875541814 | 0.748 | 0.859 | 9.14E-100 | 1.2 |
| EMP1      | 1.79E-103 | 0.68597431   | 0.841 | 0.684 | 4.33E-99  | 1.2 |
| ANKRD36C  | 4.21E-103 | 0.785989128  | 0.734 | 0.511 | 1.01E-98  | 1.2 |
| ANK3      | 2.73E-102 | -0.959297928 | 0.146 | 0.399 | 6.58E-98  | 1.2 |
| RCAN1     | 1.06E-99  | 0.788912859  | 0.808 | 0.622 | 2.55E-95  | 1.2 |
| MYO1E     | 6.80E-97  | 0.849207902  | 0.64  | 0.445 | 1.64E-92  | 1.2 |
| ATP2B4    | 1.17E-95  | 0.926698619  | 0.435 | 0.227 | 2.83E-91  | 1.2 |
| DOCK4     | 4.34E-92  | -0.979738155 | 0.168 | 0.411 | 1.05E-87  | 1.2 |
| LRRFIP1   | 2.23E-91  | 0.707872145  | 0.654 | 0.477 | 5.38E-87  | 1.2 |
| CNKSR3    | 8.68E-91  | -0.868551423 | 0.315 | 0.57  | 2.09E-86  | 1.2 |
| ACTB      | 1.44E-89  | 0.747548404  | 0.737 | 0.582 | 3.48E-85  | 1.2 |
| OVOS2     | 1.76E-88  | -1.556829942 | 0.342 | 0.546 | 4.25E-84  | 1.2 |
| MAP1B     | 4.53E-85  | 0.791465914  | 0.564 | 0.364 | 1.09E-80  | 1.2 |
| PALLD     | 1.49E-82  | 0.68032946   | 0.654 | 0.476 | 3.59E-78  | 1.2 |
| PGK1      | 4.65E-81  | 0.617772484  | 0.776 | 0.617 | 1.12E-76  | 1.2 |
| EHF       | 6.60E-81  | -0.738875005 | 0.415 | 0.65  | 1.59E-76  | 1.2 |
| TEAD1     | 7.24E-80  | 0.70099231   | 0.524 | 0.326 | 1.75E-75  | 1.2 |
| CHI3L2    | 8.01E-80  | -0.954331686 | 0.32  | 0.55  | 1.93E-75  | 1.2 |
| KRT23     | 5.19E-79  | 0.912419582  | 0.384 | 0.202 | 1.25E-74  | 1.2 |
| TNFSF10   | 7.54E-79  | -0.752314243 | 0.312 | 0.543 | 1.82E-74  | 1.2 |
| GUCY1A3   | 1.92E-76  | -0.740712953 | 0.076 | 0.274 | 4.63E-72  | 1.2 |
| DAPP1     | 5.81E-76  | 0.769764982  | 0.55  | 0.374 | 1.40E-71  | 1.2 |
| CAPN2     | 7.38E-76  | 0.660233263  | 0.448 | 0.255 | 1.78E-71  | 1.2 |
| SFRP1     | 2.64E-75  | -0.683332886 | 0.282 | 0.51  | 6.37E-71  | 1.2 |
| FBLN5     | 4.16E-74  | -1.055660901 | 0.169 | 0.382 | 1.00E-69  | 1.2 |
| KIAA1217  | 9.55E-74  | -0.538388985 | 0.697 | 0.858 | 2.30E-69  | 1.2 |
| CD59      | 1.07E-73  | 0.611497254  | 0.939 | 0.844 | 2.59E-69  | 1.2 |
| CXCL8     | 2.04E-73  | 1.774378938  | 0.501 | 0.317 | 4.91E-69  | 1.2 |
| CAST      | 9.19E-72  | 0.599355778  | 0.663 | 0.51  | 2.22E-67  | 1.2 |
| HIST1H2AC | 6.37E-71  | -0.745119815 | 0.154 | 0.365 | 1.54E-66  | 1.2 |
| ELK3      | 1.11E-70  | 0.570744358  | 0.312 | 0.147 | 2.69E-66  | 1.2 |
| SAA1      | 5.42E-70  | -1.488416892 | 0.955 | 0.954 | 1.31E-65  | 1.2 |
| CHODL     | 7.30E-67  | -0.784217599 | 0.065 | 0.24  | 1.76E-62  | 1.2 |
| S100A10   | 2.59E-66  | 0.730291709  | 0.45  | 0.269 | 6.24E-62  | 1.2 |
| LRIG1     | 4.42E-66  | -0.761018214 | 0.1   | 0.287 | 1.07E-61  | 1.2 |

|           |          |              |       |       |          |     |
|-----------|----------|--------------|-------|-------|----------|-----|
| AKR1C3    | 5.24E-66 | -0.615262292 | 0.057 | 0.229 | 1.26E-61 | 1.2 |
| TIAM1     | 1.55E-64 | 0.646728649  | 0.454 | 0.27  | 3.73E-60 | 1.2 |
| TMSB4X    | 1.76E-64 | 0.53510384   | 0.941 | 0.874 | 4.23E-60 | 1.2 |
| STX12     | 5.47E-64 | 0.659457116  | 0.574 | 0.414 | 1.32E-59 | 1.2 |
| PADI2     | 1.77E-63 | -0.607123551 | 0.052 | 0.216 | 4.26E-59 | 1.2 |
| CYP1B1    | 4.86E-63 | -0.618000873 | 0.016 | 0.156 | 1.17E-58 | 1.2 |
| MAP2      | 1.95E-62 | 0.579912065  | 0.286 | 0.134 | 4.69E-58 | 1.2 |
| LAMC2     | 4.72E-62 | 0.776544767  | 0.422 | 0.259 | 1.14E-57 | 1.2 |
| HMG3      | 5.73E-62 | -0.512155404 | 0.045 | 0.203 | 1.38E-57 | 1.2 |
| RNF145    | 7.84E-61 | -0.737942859 | 0.411 | 0.606 | 1.89E-56 | 1.2 |
| SLC26A2   | 1.14E-60 | -0.713299684 | 0.042 | 0.194 | 2.75E-56 | 1.2 |
| ZFP36L2   | 1.74E-60 | -0.728787261 | 0.203 | 0.408 | 4.20E-56 | 1.2 |
| RP11-114H | 1.94E-60 | -0.819129203 | 0.061 | 0.221 | 4.68E-56 | 1.2 |
| ADAM32    | 4.20E-60 | 0.64067619   | 0.225 | 0.095 | 1.01E-55 | 1.2 |
| FHIT      | 4.54E-60 | -0.733767798 | 0.234 | 0.43  | 1.10E-55 | 1.2 |
| ITPR2     | 1.09E-59 | -0.614944169 | 0.389 | 0.588 | 2.62E-55 | 1.2 |
| PLXDC2    | 1.25E-59 | -0.579163627 | 0.101 | 0.278 | 3.00E-55 | 1.2 |
| EZR       | 4.88E-59 | 0.55924245   | 0.445 | 0.273 | 1.18E-54 | 1.2 |
| MEIS2     | 8.16E-59 | -0.625090095 | 0.116 | 0.295 | 1.97E-54 | 1.2 |
| SSBP2     | 1.08E-58 | -0.73410393  | 0.194 | 0.388 | 2.60E-54 | 1.2 |
| VNN3      | 3.64E-58 | -0.867918081 | 0.134 | 0.31  | 8.77E-54 | 1.2 |
| SAMD4A    | 4.59E-58 | 0.512136547  | 0.752 | 0.61  | 1.11E-53 | 1.2 |
| RPL24     | 1.92E-57 | 0.339329988  | 0.963 | 0.951 | 4.63E-53 | 1.2 |
| FGF13     | 2.04E-57 | 0.746248802  | 0.338 | 0.184 | 4.92E-53 | 1.2 |
| ZPLD1     | 1.58E-56 | 0.831416245  | 0.226 | 0.099 | 3.82E-52 | 1.2 |
| PBX1      | 2.17E-56 | -0.590468008 | 0.092 | 0.261 | 5.23E-52 | 1.2 |
| INADL     | 6.50E-56 | 0.421602193  | 0.876 | 0.778 | 1.57E-51 | 1.2 |
| SMARCA2   | 6.95E-56 | -0.607614329 | 0.162 | 0.341 | 1.68E-51 | 1.2 |
| GHR       | 7.33E-56 | -0.684218338 | 0.031 | 0.168 | 1.77E-51 | 1.2 |
| SELK      | 1.08E-55 | 0.502205197  | 0.761 | 0.651 | 2.61E-51 | 1.2 |
| RP5-1198O | 1.88E-55 | -0.632045358 | 0.045 | 0.19  | 4.54E-51 | 1.2 |
| SEPP1     | 3.67E-55 | -0.646300333 | 0.22  | 0.403 | 8.84E-51 | 1.2 |
| YWHAH     | 4.75E-55 | 0.533704991  | 0.337 | 0.186 | 1.15E-50 | 1.2 |
| TPM4      | 6.18E-55 | 0.565711332  | 0.615 | 0.464 | 1.49E-50 | 1.2 |
| FXD3      | 1.03E-53 | -0.546307639 | 0.381 | 0.563 | 2.50E-49 | 1.2 |
| CDH1      | 1.42E-53 | 0.503240665  | 0.636 | 0.483 | 3.42E-49 | 1.2 |
| INSIG2    | 3.24E-53 | 0.487185854  | 0.358 | 0.202 | 7.80E-49 | 1.2 |
| LDLRAD4   | 3.48E-53 | -0.592432115 | 0.059 | 0.207 | 8.38E-49 | 1.2 |
| BCL6      | 4.92E-53 | -0.649175253 | 0.198 | 0.381 | 1.19E-48 | 1.2 |
| GCNT2     | 5.62E-53 | -0.605155404 | 0.219 | 0.405 | 1.36E-48 | 1.2 |
| RARRES3   | 1.38E-52 | -0.634921979 | 0.18  | 0.355 | 3.33E-48 | 1.2 |
| PSTPIP2   | 4.70E-52 | -0.624741395 | 0.215 | 0.397 | 1.13E-47 | 1.2 |
| WWOX      | 1.57E-51 | -0.797394272 | 0.101 | 0.258 | 3.79E-47 | 1.2 |
| CDCP1     | 3.33E-51 | 0.565122653  | 0.496 | 0.343 | 8.03E-47 | 1.2 |
| THSD4     | 3.71E-51 | 0.614047249  | 0.54  | 0.381 | 8.94E-47 | 1.2 |
| GBE1      | 4.11E-51 | 0.714501779  | 0.519 | 0.364 | 9.90E-47 | 1.2 |
| ST5       | 7.93E-51 | -0.691372131 | 0.251 | 0.431 | 1.91E-46 | 1.2 |

|          |          |              |       |       |          |     |
|----------|----------|--------------|-------|-------|----------|-----|
| KIT      | 1.49E-50 | -0.512590931 | 0.218 | 0.409 | 3.59E-46 | 1.2 |
| GALNT3   | 1.57E-50 | 0.546786019  | 0.325 | 0.181 | 3.79E-46 | 1.2 |
| TRIO     | 1.79E-50 | 0.288491473  | 0.836 | 0.718 | 4.31E-46 | 1.2 |
| ZNF521   | 2.02E-49 | -0.555718664 | 0.071 | 0.216 | 4.87E-45 | 1.2 |
| CHI3L1   | 3.08E-49 | -1.10980202  | 0.085 | 0.234 | 7.42E-45 | 1.2 |
| NEBL     | 4.60E-49 | -0.566993738 | 0.359 | 0.542 | 1.11E-44 | 1.2 |
| THADA    | 6.78E-49 | -0.694548195 | 0.144 | 0.31  | 1.64E-44 | 1.2 |
| ATXN1    | 8.58E-49 | 0.591522488  | 0.48  | 0.329 | 2.07E-44 | 1.2 |
| FDPS     | 2.27E-48 | -0.660849886 | 0.332 | 0.498 | 5.46E-44 | 1.2 |
| MALAT1   | 6.78E-48 | 0.270988535  | 1     | 1     | 1.63E-43 | 1.2 |
| ZNF518A  | 1.40E-47 | -0.504968486 | 0.075 | 0.218 | 3.39E-43 | 1.2 |
| ALDH1A3  | 1.64E-47 | 0.51783086   | 0.652 | 0.51  | 3.95E-43 | 1.2 |
| BTG1     | 2.07E-47 | -0.602048448 | 0.335 | 0.506 | 4.99E-43 | 1.2 |
| FAM13A   | 3.72E-47 | -0.759045272 | 0.244 | 0.415 | 8.97E-43 | 1.2 |
| PPP1R9A  | 5.97E-47 | -0.488572925 | 0.09  | 0.239 | 1.44E-42 | 1.2 |
| NEAT1    | 1.01E-46 | 0.365305804  | 0.986 | 0.959 | 2.42E-42 | 1.2 |
| ANKS1B   | 2.92E-46 | -0.546046389 | 0.144 | 0.308 | 7.05E-42 | 1.2 |
| C4orf3   | 9.44E-46 | 0.506013926  | 0.702 | 0.605 | 2.28E-41 | 1.2 |
| SLC34A2  | 2.01E-45 | -0.570593505 | 0.162 | 0.321 | 4.84E-41 | 1.2 |
| PODXL    | 2.66E-45 | -0.470745213 | 0.078 | 0.219 | 6.42E-41 | 1.2 |
| PPP1CB   | 3.82E-45 | -0.534302636 | 0.284 | 0.46  | 9.20E-41 | 1.2 |
| USP54    | 4.56E-45 | -0.576554547 | 0.372 | 0.554 | 1.10E-40 | 1.2 |
| ESR1     | 1.22E-44 | -0.469926243 | 0.04  | 0.163 | 2.94E-40 | 1.2 |
| C10orf90 | 1.26E-44 | -0.417210212 | 0.024 | 0.136 | 3.05E-40 | 1.2 |
| FOSL1    | 2.65E-44 | 0.437084704  | 0.181 | 0.076 | 6.38E-40 | 1.2 |
| PRNP     | 7.61E-44 | 0.454574691  | 0.224 | 0.109 | 1.83E-39 | 1.2 |
| ARRDC3   | 8.77E-44 | -0.481027336 | 0.525 | 0.685 | 2.12E-39 | 1.2 |
| LDHA     | 1.02E-43 | 0.373594074  | 0.793 | 0.698 | 2.46E-39 | 1.2 |
| GLUL     | 1.16E-43 | -0.640799819 | 0.198 | 0.36  | 2.80E-39 | 1.2 |
| MGAM2    | 1.38E-43 | -0.633946369 | 0.208 | 0.375 | 3.32E-39 | 1.2 |
| NOS1AP   | 2.11E-43 | -0.551355545 | 0.06  | 0.188 | 5.08E-39 | 1.2 |
| MAP4     | 3.13E-43 | 0.519213471  | 0.533 | 0.403 | 7.56E-39 | 1.2 |
| ANO6     | 3.42E-43 | 0.517502861  | 0.464 | 0.322 | 8.25E-39 | 1.2 |
| ANXA11   | 4.39E-43 | 0.511091261  | 0.353 | 0.215 | 1.06E-38 | 1.2 |
| DHCR24   | 5.18E-43 | -0.414816658 | 0.067 | 0.198 | 1.25E-38 | 1.2 |
| ATP1B1   | 5.33E-43 | 0.450010977  | 0.783 | 0.691 | 1.28E-38 | 1.2 |
| MICAL3   | 1.58E-42 | 0.541472735  | 0.415 | 0.27  | 3.82E-38 | 1.2 |
| ANXA3    | 2.83E-42 | 0.536700652  | 0.522 | 0.383 | 6.83E-38 | 1.2 |
| MET      | 3.83E-42 | 0.468820931  | 0.471 | 0.32  | 9.23E-38 | 1.2 |
| DENND2C  | 5.03E-42 | 0.311999941  | 0.094 | 0.026 | 1.21E-37 | 1.2 |
| PDK3     | 5.22E-42 | -0.596899649 | 0.162 | 0.315 | 1.26E-37 | 1.2 |
| FAAH2    | 9.52E-42 | -0.484814469 | 0.102 | 0.242 | 2.30E-37 | 1.2 |
| TXNIP    | 1.03E-41 | -0.827065972 | 0.355 | 0.494 | 2.49E-37 | 1.2 |
| ANXA5    | 1.07E-41 | 0.599915174  | 0.354 | 0.222 | 2.58E-37 | 1.2 |
| LDHB     | 1.17E-41 | -0.409537608 | 0.652 | 0.777 | 2.83E-37 | 1.2 |
| RASA2    | 2.45E-41 | 0.333436514  | 0.729 | 0.604 | 5.91E-37 | 1.2 |
| RPL36AL  | 2.48E-41 | 0.323812713  | 0.933 | 0.909 | 5.99E-37 | 1.2 |

|           |          |              |       |       |          |     |
|-----------|----------|--------------|-------|-------|----------|-----|
| FABP7     | 2.75E-41 | -1.318413858 | 0.116 | 0.251 | 6.64E-37 | 1.2 |
| ST8SIA1   | 3.06E-41 | -0.453507927 | 0.078 | 0.211 | 7.38E-37 | 1.2 |
| MAP4K4    | 4.43E-41 | 0.54406961   | 0.457 | 0.323 | 1.07E-36 | 1.2 |
| ALPK1     | 4.72E-41 | -0.546800831 | 0.182 | 0.333 | 1.14E-36 | 1.2 |
| UTRN      | 6.55E-41 | -0.484736379 | 0.104 | 0.247 | 1.58E-36 | 1.2 |
| PDE7A     | 6.90E-41 | -0.52922302  | 0.148 | 0.296 | 1.66E-36 | 1.2 |
| TM2D2     | 6.96E-41 | 0.297477566  | 0.121 | 0.042 | 1.68E-36 | 1.2 |
| MAP2K1    | 7.61E-41 | 0.488366982  | 0.311 | 0.183 | 1.84E-36 | 1.2 |
| SEC61G    | 7.99E-41 | 0.443955948  | 0.764 | 0.684 | 1.93E-36 | 1.2 |
| S100A14   | 1.07E-40 | 0.580857462  | 0.736 | 0.647 | 2.59E-36 | 1.2 |
| MYO1D     | 1.20E-40 | 0.498819189  | 0.374 | 0.237 | 2.90E-36 | 1.2 |
| SLC27A4   | 1.65E-40 | 0.561739597  | 0.667 | 0.535 | 3.97E-36 | 1.2 |
| NR2F2-AS1 | 2.00E-40 | -0.446259697 | 0.049 | 0.167 | 4.82E-36 | 1.2 |
| CFLAR     | 2.67E-40 | 0.577897743  | 0.559 | 0.444 | 6.43E-36 | 1.2 |
| TC2N      | 3.12E-40 | -0.464766846 | 0.219 | 0.387 | 7.52E-36 | 1.2 |
| SLC20A2   | 4.55E-40 | 0.531913269  | 0.493 | 0.356 | 1.10E-35 | 1.2 |
| KRT6B     | 5.20E-40 | 0.757489267  | 0.201 | 0.097 | 1.25E-35 | 1.2 |
| RP1-78O14 | 5.83E-40 | 0.501680708  | 0.132 | 0.05  | 1.41E-35 | 1.2 |
| CYP7B1    | 6.51E-40 | -0.646112983 | 0.248 | 0.411 | 1.57E-35 | 1.2 |
| SAT1      | 7.20E-40 | 0.414345029  | 0.976 | 0.958 | 1.74E-35 | 1.2 |
| SERPINB7  | 1.03E-39 | -0.742710479 | 0.094 | 0.225 | 2.48E-35 | 1.2 |
| RPLP0     | 1.22E-39 | -0.449928759 | 0.883 | 0.908 | 2.94E-35 | 1.2 |
| FIGN      | 2.13E-39 | -0.408789522 | 0.044 | 0.158 | 5.13E-35 | 1.2 |
| TMEM87A   | 2.76E-39 | -0.441415573 | 0.236 | 0.398 | 6.66E-35 | 1.2 |
| CDC42     | 5.98E-39 | 0.394499763  | 0.772 | 0.681 | 1.44E-34 | 1.2 |
| MAML2     | 6.67E-39 | -0.38268888  | 0.672 | 0.811 | 1.61E-34 | 1.2 |
| SUB1      | 8.61E-39 | 0.41144116   | 0.795 | 0.742 | 2.08E-34 | 1.2 |
| C6orf132  | 9.61E-39 | 0.415036556  | 0.256 | 0.139 | 2.32E-34 | 1.2 |
| NALCN     | 1.36E-38 | -0.409310333 | 0.06  | 0.18  | 3.29E-34 | 1.2 |
| PTN       | 2.18E-38 | 0.638070894  | 0.335 | 0.202 | 5.25E-34 | 1.2 |
| ARFGEF3   | 2.64E-38 | 0.42765975   | 0.331 | 0.2   | 6.36E-34 | 1.2 |
| RP11-449D | 2.78E-38 | -0.420403654 | 0.016 | 0.108 | 6.70E-34 | 1.2 |
| MT-CO3    | 5.36E-38 | -0.240381559 | 0.996 | 0.993 | 1.29E-33 | 1.2 |
| ARHGAP26  | 7.28E-38 | -0.51218076  | 0.124 | 0.263 | 1.75E-33 | 1.2 |
| AC016995. | 7.93E-38 | -0.474181517 | 0.096 | 0.226 | 1.91E-33 | 1.2 |
| CNTN4     | 1.16E-37 | -0.623416819 | 0.096 | 0.225 | 2.79E-33 | 1.2 |
| MAP3K13   | 1.23E-37 | 0.454945288  | 0.872 | 0.817 | 2.97E-33 | 1.2 |
| NAMPT     | 1.59E-37 | -0.508373323 | 0.465 | 0.618 | 3.85E-33 | 1.2 |
| SRPK1     | 1.61E-37 | 0.477665916  | 0.658 | 0.56  | 3.89E-33 | 1.2 |
| DSG3      | 2.01E-37 | 0.691053381  | 0.133 | 0.051 | 4.85E-33 | 1.2 |
| YWHAZ     | 2.09E-37 | 0.422537914  | 0.664 | 0.567 | 5.05E-33 | 1.2 |
| CNN3      | 2.10E-37 | 0.3535146    | 0.57  | 0.432 | 5.05E-33 | 1.2 |
| RPS3      | 9.64E-37 | -0.567883406 | 0.914 | 0.931 | 2.32E-32 | 1.2 |
| DCHS2     | 1.56E-36 | -0.505703923 | 0.06  | 0.174 | 3.77E-32 | 1.2 |
| CXCR4     | 2.59E-36 | -0.721866628 | 0.188 | 0.33  | 6.25E-32 | 1.2 |
| AGAP1     | 2.83E-36 | -0.537878616 | 0.523 | 0.645 | 6.81E-32 | 1.2 |
| FEM1B     | 3.46E-36 | 0.402829054  | 0.205 | 0.103 | 8.34E-32 | 1.2 |

|           |          |              |       |       |          |     |
|-----------|----------|--------------|-------|-------|----------|-----|
| S100A8    | 6.27E-36 | -1.681492828 | 0.119 | 0.244 | 1.51E-31 | 1.2 |
| TXNRD1    | 8.17E-36 | 0.431616856  | 0.507 | 0.377 | 1.97E-31 | 1.2 |
| ZMYND8    | 2.01E-35 | -0.440542518 | 0.151 | 0.291 | 4.84E-31 | 1.2 |
| RASGRP1   | 2.17E-35 | -0.418644226 | 0.054 | 0.163 | 5.24E-31 | 1.2 |
| SLC39A8   | 2.52E-35 | -0.461651568 | 0.062 | 0.174 | 6.07E-31 | 1.2 |
| FDCSP     | 2.79E-35 | -2.500981329 | 0.112 | 0.231 | 6.74E-31 | 1.2 |
| CTD-2015G | 3.16E-35 | -0.368628272 | 0.085 | 0.208 | 7.62E-31 | 1.2 |
| CLMN      | 3.83E-35 | 0.423910111  | 0.67  | 0.568 | 9.22E-31 | 1.2 |
| MAP3K5    | 5.06E-35 | -0.433910718 | 0.204 | 0.355 | 1.22E-30 | 1.2 |
| RPS12     | 5.43E-35 | -0.554529795 | 0.672 | 0.753 | 1.31E-30 | 1.2 |
| CCL2      | 7.73E-35 | -0.51293942  | 0.319 | 0.464 | 1.86E-30 | 1.2 |
| AKR1C1    | 2.11E-34 | -0.559097686 | 0.044 | 0.146 | 5.08E-30 | 1.2 |
| CACNB2    | 2.40E-34 | -0.417528396 | 0.058 | 0.167 | 5.79E-30 | 1.2 |
| COG5      | 2.45E-34 | 0.476268473  | 0.543 | 0.435 | 5.91E-30 | 1.2 |
| CHD2      | 2.84E-34 | 0.443424175  | 0.527 | 0.405 | 6.85E-30 | 1.2 |
| SON       | 4.17E-34 | 0.485744199  | 0.755 | 0.671 | 1.00E-29 | 1.2 |
| NCOA1     | 4.29E-34 | -0.474770175 | 0.285 | 0.436 | 1.03E-29 | 1.2 |
| SORBS1    | 4.54E-34 | -0.392822987 | 0.23  | 0.376 | 1.10E-29 | 1.2 |
| HIVEP2    | 6.89E-34 | 0.456703563  | 0.469 | 0.339 | 1.66E-29 | 1.2 |
| CLUU1OS   | 1.57E-33 | -0.299727539 | 0.022 | 0.11  | 3.78E-29 | 1.2 |
| HRSP12    | 2.34E-33 | -0.275259715 | 0.021 | 0.108 | 5.64E-29 | 1.2 |
| RPS6KA5   | 2.59E-33 | -0.409921539 | 0.111 | 0.237 | 6.24E-29 | 1.2 |
| SERPINB4  | 3.02E-33 | -1.168525682 | 0.027 | 0.116 | 7.29E-29 | 1.2 |
| KIAA0922  | 5.38E-33 | -0.723827589 | 0.163 | 0.289 | 1.30E-28 | 1.2 |
| PHLDA1    | 6.84E-33 | -0.364483418 | 0.081 | 0.198 | 1.65E-28 | 1.2 |
| ZFAS1     | 7.21E-33 | 0.272716244  | 0.97  | 0.96  | 1.74E-28 | 1.2 |
| SERPINB3  | 7.57E-33 | -1.025264515 | 0.019 | 0.103 | 1.83E-28 | 1.2 |
| TNFAIP2   | 7.86E-33 | -0.721970378 | 0.191 | 0.328 | 1.89E-28 | 1.2 |
| TMEM217   | 1.13E-32 | 0.310128908  | 0.129 | 0.053 | 2.73E-28 | 1.2 |
| SAA2-SAA4 | 1.52E-32 | -0.489763914 | 0.267 | 0.406 | 3.66E-28 | 1.2 |
| RTN4      | 1.91E-32 | 0.353889514  | 0.698 | 0.607 | 4.62E-28 | 1.2 |
| CAMTA1    | 2.17E-32 | 0.398027108  | 0.608 | 0.499 | 5.24E-28 | 1.2 |
| NCALD     | 2.27E-32 | -0.474004637 | 0.119 | 0.244 | 5.46E-28 | 1.2 |
| BMPR1B    | 2.30E-32 | 0.478382561  | 0.074 | 0.021 | 5.54E-28 | 1.2 |
| GNE       | 2.81E-32 | -0.392191615 | 0.087 | 0.203 | 6.78E-28 | 1.2 |
| RPL19     | 3.11E-32 | -0.399620101 | 0.927 | 0.941 | 7.50E-28 | 1.2 |
| MAMLD1    | 6.40E-32 | 0.330479173  | 0.111 | 0.043 | 1.54E-27 | 1.2 |
| COL6A2    | 6.93E-32 | 0.514411872  | 0.219 | 0.12  | 1.67E-27 | 1.2 |
| MLLT4     | 1.66E-31 | 0.222463523  | 0.755 | 0.636 | 4.01E-27 | 1.2 |
| RORA      | 2.40E-31 | -0.440529294 | 0.375 | 0.517 | 5.80E-27 | 1.2 |
| PAPSS1    | 2.50E-31 | -0.428436443 | 0.262 | 0.408 | 6.03E-27 | 1.2 |
| RP11-142C | 2.67E-31 | -0.354494524 | 0.046 | 0.143 | 6.44E-27 | 1.2 |
| MIR4435-2 | 3.13E-31 | 0.483296661  | 0.565 | 0.462 | 7.55E-27 | 1.2 |
| HIST1H2BB | 3.27E-31 | -0.380996191 | 0.057 | 0.159 | 7.90E-27 | 1.2 |
| MYO3B     | 3.29E-31 | 0.475239036  | 0.294 | 0.182 | 7.94E-27 | 1.2 |
| NFIA      | 3.61E-31 | -0.343851195 | 0.051 | 0.151 | 8.70E-27 | 1.2 |
| TCF7L1    | 3.96E-31 | -0.501566553 | 0.229 | 0.365 | 9.56E-27 | 1.2 |

|           |          |              |       |       |          |     |
|-----------|----------|--------------|-------|-------|----------|-----|
| HERC4     | 6.39E-31 | 0.466952495  | 0.483 | 0.368 | 1.54E-26 | 1.2 |
| 3-Mar     | 6.54E-31 | -0.537471152 | 0.116 | 0.236 | 1.58E-26 | 1.2 |
| SKP1      | 7.77E-31 | 0.350023423  | 0.863 | 0.831 | 1.87E-26 | 1.2 |
| TES       | 8.05E-31 | 0.38187925   | 0.417 | 0.295 | 1.94E-26 | 1.2 |
| GRIN2A    | 1.08E-30 | 0.425554626  | 0.109 | 0.042 | 2.61E-26 | 1.2 |
| LRP2      | 1.09E-30 | -0.473309853 | 0.136 | 0.259 | 2.63E-26 | 1.2 |
| AUH       | 1.47E-30 | -0.512449197 | 0.233 | 0.368 | 3.55E-26 | 1.2 |
| CAP1      | 1.50E-30 | 0.388283323  | 0.315 | 0.204 | 3.63E-26 | 1.2 |
| CLU       | 1.54E-30 | -0.62776208  | 0.039 | 0.13  | 3.72E-26 | 1.2 |
| FMN1      | 1.56E-30 | -0.413303582 | 0.083 | 0.193 | 3.76E-26 | 1.2 |
| SLC9C1    | 1.78E-30 | 0.211975731  | 0.066 | 0.018 | 4.29E-26 | 1.2 |
| DSG2      | 2.03E-30 | 0.411968778  | 0.445 | 0.335 | 4.91E-26 | 1.2 |
| MTM1      | 2.12E-30 | 0.440093685  | 0.277 | 0.173 | 5.12E-26 | 1.2 |
| RPL10A    | 3.42E-30 | -0.398624652 | 0.738 | 0.799 | 8.26E-26 | 1.2 |
| MGST2     | 3.43E-30 | -0.345499453 | 0.086 | 0.196 | 8.26E-26 | 1.2 |
| GCLM      | 3.57E-30 | 0.513953613  | 0.231 | 0.135 | 8.61E-26 | 1.2 |
| MPRIP     | 3.80E-30 | 0.419134044  | 0.314 | 0.204 | 9.17E-26 | 1.2 |
| EEF1B2    | 4.28E-30 | -0.356599139 | 0.853 | 0.892 | 1.03E-25 | 1.2 |
| ST6GALNA1 | 5.58E-30 | 0.578949836  | 0.477 | 0.363 | 1.35E-25 | 1.2 |
| UCK2      | 6.12E-30 | -0.35876387  | 0.086 | 0.195 | 1.48E-25 | 1.2 |
| SLC5A6    | 7.03E-30 | -0.322678875 | 0.057 | 0.155 | 1.70E-25 | 1.2 |
| SDCBP     | 7.13E-30 | 0.464594676  | 0.771 | 0.7   | 1.72E-25 | 1.2 |
| CD55      | 8.00E-30 | 0.460086062  | 0.467 | 0.354 | 1.93E-25 | 1.2 |
| PTRF      | 9.83E-30 | 0.386979193  | 0.257 | 0.154 | 2.37E-25 | 1.2 |
| CD44      | 1.38E-29 | 0.477853536  | 0.562 | 0.458 | 3.33E-25 | 1.2 |
| MYO6      | 1.53E-29 | 0.28020667   | 0.711 | 0.628 | 3.68E-25 | 1.2 |
| CADPS2    | 6.42E-29 | -0.403276594 | 0.205 | 0.34  | 1.55E-24 | 1.2 |
| FOXN3     | 8.60E-29 | -0.373782291 | 0.138 | 0.26  | 2.07E-24 | 1.2 |
| EIF2AK3   | 1.50E-28 | -0.695611588 | 0.209 | 0.325 | 3.63E-24 | 1.2 |
| CLEC7A    | 1.67E-28 | -0.335675057 | 0.055 | 0.149 | 4.02E-24 | 1.2 |
| JUP       | 1.89E-28 | 0.443763154  | 0.301 | 0.197 | 4.56E-24 | 1.2 |
| RALGPS2   | 2.04E-28 | 0.429375191  | 0.236 | 0.14  | 4.92E-24 | 1.2 |
| ADAM9     | 3.08E-28 | 0.247624545  | 0.668 | 0.553 | 7.42E-24 | 1.2 |
| FGF2      | 3.13E-28 | 0.396410301  | 0.15  | 0.072 | 7.54E-24 | 1.2 |
| CRIM1     | 3.63E-28 | 0.332973604  | 0.596 | 0.477 | 8.76E-24 | 1.2 |
| SERPINA3  | 4.60E-28 | -0.485981028 | 0.126 | 0.244 | 1.11E-23 | 1.2 |
| FAM168A   | 5.49E-28 | -0.411983839 | 0.133 | 0.249 | 1.32E-23 | 1.2 |
| S100A6    | 5.70E-28 | 0.709633279  | 0.546 | 0.443 | 1.37E-23 | 1.2 |
| ATL2      | 5.85E-28 | -0.375768275 | 0.184 | 0.312 | 1.41E-23 | 1.2 |
| AMBRA1    | 7.56E-28 | -0.29325773  | 0.648 | 0.755 | 1.82E-23 | 1.2 |
| OCLN      | 1.17E-27 | 0.358931282  | 0.404 | 0.289 | 2.82E-23 | 1.2 |
| SCP2      | 1.27E-27 | -0.31003017  | 0.136 | 0.257 | 3.07E-23 | 1.2 |
| RPL10     | 1.85E-27 | -0.485763776 | 0.961 | 0.965 | 4.46E-23 | 1.2 |
| DENND2D   | 1.96E-27 | -0.292630858 | 0.061 | 0.155 | 4.72E-23 | 1.2 |
| RGL1      | 2.04E-27 | -0.279002066 | 0.03  | 0.11  | 4.91E-23 | 1.2 |
| ITGB1     | 2.12E-27 | 0.378783386  | 0.448 | 0.331 | 5.10E-23 | 1.2 |
| SEMA4B    | 2.14E-27 | -0.358343888 | 0.085 | 0.187 | 5.16E-23 | 1.2 |



|           |          |              |       |       |          |     |
|-----------|----------|--------------|-------|-------|----------|-----|
| SCARA3    | 2.58E-27 | -0.284563044 | 0.013 | 0.081 | 6.22E-23 | 1.2 |
| PTGS2     | 2.65E-27 | 0.420038169  | 0.059 | 0.016 | 6.39E-23 | 1.2 |
| SYNM      | 2.83E-27 | -0.436755004 | 0.08  | 0.18  | 6.84E-23 | 1.2 |
| FOXP1     | 3.43E-27 | -0.433999191 | 0.454 | 0.578 | 8.26E-23 | 1.2 |
| KRT16     | 3.47E-27 | 0.297001174  | 0.053 | 0.013 | 8.38E-23 | 1.2 |
| TBC1D5    | 3.50E-27 | -0.441619867 | 0.255 | 0.384 | 8.43E-23 | 1.2 |
| ASAP1     | 3.78E-27 | 0.413587993  | 0.327 | 0.219 | 9.13E-23 | 1.2 |
| DDX21     | 3.83E-27 | 0.384137742  | 0.679 | 0.611 | 9.23E-23 | 1.2 |
| LRRFIP2   | 3.98E-27 | 0.162186234  | 0.856 | 0.802 | 9.59E-23 | 1.2 |
| MAL2      | 4.43E-27 | 0.39077865   | 0.331 | 0.224 | 1.07E-22 | 1.2 |
| ECHDC1    | 4.47E-27 | -0.353986513 | 0.178 | 0.303 | 1.08E-22 | 1.2 |
| SMS       | 4.84E-27 | 0.376988186  | 0.479 | 0.365 | 1.17E-22 | 1.2 |
| ARL6IP5   | 5.99E-27 | -0.300262242 | 0.373 | 0.521 | 1.45E-22 | 1.2 |
| MT-CO2    | 6.41E-27 | -0.235444952 | 0.987 | 0.985 | 1.55E-22 | 1.2 |
| RPS23     | 6.43E-27 | -0.218879697 | 0.99  | 0.982 | 1.55E-22 | 1.2 |
| DPYD      | 7.20E-27 | -0.455992127 | 0.431 | 0.56  | 1.74E-22 | 1.2 |
| CTTNBP2N1 | 7.90E-27 | 0.370302048  | 0.366 | 0.26  | 1.91E-22 | 1.2 |
| ZBTB16    | 8.06E-27 | -0.415911202 | 0.181 | 0.305 | 1.94E-22 | 1.2 |
| NUTM2A-A  | 8.56E-27 | 0.370495269  | 0.36  | 0.254 | 2.06E-22 | 1.2 |
| HSD17B4   | 9.33E-27 | -0.331194839 | 0.083 | 0.183 | 2.25E-22 | 1.2 |
| SLC12A2   | 1.00E-26 | -0.520460388 | 0.444 | 0.566 | 2.41E-22 | 1.2 |
| TRABD2B   | 1.10E-26 | -0.398081367 | 0.04  | 0.123 | 2.66E-22 | 1.2 |
| PDLIM5    | 1.18E-26 | 0.313273739  | 0.864 | 0.831 | 2.86E-22 | 1.2 |
| HSD17B7   | 1.28E-26 | -0.325493352 | 0.048 | 0.135 | 3.08E-22 | 1.2 |
| TPCN1     | 1.45E-26 | -0.344443147 | 0.051 | 0.14  | 3.50E-22 | 1.2 |
| EIF2B5    | 1.61E-26 | -0.43123827  | 0.475 | 0.592 | 3.87E-22 | 1.2 |
| KLF6      | 1.70E-26 | 0.363292627  | 0.601 | 0.505 | 4.11E-22 | 1.2 |
| RCC1      | 1.77E-26 | 0.415111072  | 0.436 | 0.333 | 4.27E-22 | 1.2 |
| EPB41L1   | 2.00E-26 | -0.305922394 | 0.039 | 0.122 | 4.83E-22 | 1.2 |
| AKT3      | 2.09E-26 | 0.387955637  | 0.562 | 0.452 | 5.04E-22 | 1.2 |
| HMOX1     | 2.18E-26 | 0.462983313  | 0.113 | 0.049 | 5.25E-22 | 1.2 |
| ZNHIT6    | 2.18E-26 | -0.351800049 | 0.106 | 0.213 | 5.25E-22 | 1.2 |
| FOXN2     | 2.87E-26 | 0.356113915  | 0.165 | 0.085 | 6.93E-22 | 1.2 |
| RPS11     | 3.38E-26 | -0.390807856 | 0.716 | 0.788 | 8.14E-22 | 1.2 |
| MAML3     | 3.50E-26 | -0.341154807 | 0.151 | 0.268 | 8.44E-22 | 1.2 |
| GARS      | 3.51E-26 | 0.391142196  | 0.263 | 0.165 | 8.45E-22 | 1.2 |
| FMO2      | 4.14E-26 | -0.320753974 | 0.05  | 0.136 | 9.99E-22 | 1.2 |
| SDC4      | 4.20E-26 | 0.558645587  | 0.508 | 0.412 | 1.01E-21 | 1.2 |
| CCND3     | 5.79E-26 | -0.405572712 | 0.257 | 0.386 | 1.40E-21 | 1.2 |
| UFM1      | 6.28E-26 | 0.414721474  | 0.432 | 0.329 | 1.51E-21 | 1.2 |
| WWC1      | 6.52E-26 | -0.439125246 | 0.35  | 0.482 | 1.57E-21 | 1.2 |
| ACSL1     | 7.92E-26 | -0.347224501 | 0.143 | 0.258 | 1.91E-21 | 1.2 |
| FBXO11    | 9.70E-26 | 0.425620482  | 0.467 | 0.363 | 2.34E-21 | 1.2 |
| AHNAK     | 9.94E-26 | 0.376857022  | 0.369 | 0.265 | 2.40E-21 | 1.2 |
| INSR      | 1.12E-25 | 0.444159568  | 0.7   | 0.637 | 2.71E-21 | 1.2 |
| RPSA      | 1.23E-25 | -0.315180217 | 0.9   | 0.927 | 2.96E-21 | 1.2 |
| TMOD3     | 1.43E-25 | 0.413593651  | 0.367 | 0.264 | 3.44E-21 | 1.2 |

|                   |          |              |       |       |          |     |
|-------------------|----------|--------------|-------|-------|----------|-----|
| FTO               | 1.43E-25 | -0.313730586 | 0.145 | 0.262 | 3.45E-21 | 1.2 |
| ARID1B            | 1.67E-25 | -0.322613461 | 0.301 | 0.438 | 4.03E-21 | 1.2 |
| WTAP              | 1.77E-25 | -0.472639809 | 0.57  | 0.69  | 4.26E-21 | 1.2 |
| SORBS2            | 1.91E-25 | -0.391796124 | 0.476 | 0.607 | 4.60E-21 | 1.2 |
| LRP1B             | 2.34E-25 | -0.671682996 | 0.122 | 0.228 | 5.64E-21 | 1.2 |
| ITFG1             | 2.55E-25 | -0.368010015 | 0.155 | 0.27  | 6.15E-21 | 1.2 |
| IMMP2L            | 2.63E-25 | -0.38838786  | 0.219 | 0.344 | 6.33E-21 | 1.2 |
| COL27A1           | 2.95E-25 | -0.355330345 | 0.038 | 0.116 | 7.12E-21 | 1.2 |
| TNIP3             | 2.96E-25 | -0.255446143 | 0.023 | 0.094 | 7.14E-21 | 1.2 |
| IGF2BP2           | 4.21E-25 | 0.327827132  | 0.586 | 0.49  | 1.01E-20 | 1.2 |
| FKBP5             | 4.51E-25 | -0.445811966 | 0.19  | 0.308 | 1.09E-20 | 1.2 |
| HOOK2             | 5.27E-25 | -0.309163847 | 0.087 | 0.185 | 1.27E-20 | 1.2 |
| C1QTNF3- <i>A</i> | 7.61E-25 | -0.362133106 | 0.132 | 0.241 | 1.83E-20 | 1.2 |
| DOCK7             | 8.22E-25 | -0.338951233 | 0.154 | 0.269 | 1.98E-20 | 1.2 |
| RAD51B            | 1.05E-24 | -0.352371248 | 0.138 | 0.249 | 2.53E-20 | 1.2 |
| C1S               | 1.06E-24 | -0.261446169 | 0.05  | 0.134 | 2.55E-20 | 1.2 |
| CMIP              | 1.14E-24 | 0.374706979  | 0.441 | 0.337 | 2.76E-20 | 1.2 |
| C3orf52           | 1.15E-24 | 0.266320264  | 0.119 | 0.054 | 2.78E-20 | 1.2 |
| CFB               | 1.22E-24 | -0.316688743 | 0.066 | 0.156 | 2.95E-20 | 1.2 |
| TMBIM6            | 1.75E-24 | 0.287838045  | 0.837 | 0.789 | 4.23E-20 | 1.2 |
| TPT1-AS1          | 1.95E-24 | 0.418521977  | 0.479 | 0.387 | 4.70E-20 | 1.2 |
| PPM1L             | 2.00E-24 | -0.274114586 | 0.021 | 0.089 | 4.83E-20 | 1.2 |
| B2M               | 2.20E-24 | 0.211132081  | 0.988 | 0.985 | 5.31E-20 | 1.2 |
| TMEM41A           | 2.50E-24 | 0.386910178  | 0.284 | 0.191 | 6.03E-20 | 1.2 |
| AC005152.         | 2.54E-24 | -0.38179486  | 0.093 | 0.19  | 6.12E-20 | 1.2 |
| SORL1             | 3.05E-24 | -0.229234935 | 0.021 | 0.088 | 7.37E-20 | 1.2 |
| KPNB1             | 3.61E-24 | 0.371938381  | 0.515 | 0.427 | 8.71E-20 | 1.2 |
| GPC5              | 4.49E-24 | 0.335157462  | 0.078 | 0.029 | 1.08E-19 | 1.2 |
| IFNGR1            | 4.58E-24 | -0.34843185  | 0.167 | 0.282 | 1.10E-19 | 1.2 |
| CCL28             | 5.26E-24 | 0.53005668   | 0.735 | 0.699 | 1.27E-19 | 1.2 |
| OSBPL1A           | 5.57E-24 | -0.302249819 | 0.078 | 0.169 | 1.34E-19 | 1.2 |
| FEZ2              | 5.87E-24 | 0.424653823  | 0.462 | 0.364 | 1.42E-19 | 1.2 |
| ALDH9A1           | 5.93E-24 | -0.239508127 | 0.03  | 0.101 | 1.43E-19 | 1.2 |
| PDCD4             | 6.02E-24 | -0.348897732 | 0.14  | 0.248 | 1.45E-19 | 1.2 |
| CDK14             | 6.08E-24 | 0.393175327  | 0.481 | 0.381 | 1.47E-19 | 1.2 |
| RPS20             | 6.12E-24 | -0.335343862 | 0.955 | 0.957 | 1.47E-19 | 1.2 |
| SASH1             | 6.50E-24 | -0.315344294 | 0.217 | 0.345 | 1.57E-19 | 1.2 |
| CRY1              | 7.74E-24 | -0.499310974 | 0.256 | 0.369 | 1.87E-19 | 1.2 |
| PLCB1             | 1.18E-23 | 0.542640044  | 0.474 | 0.377 | 2.84E-19 | 1.2 |
| LINC01184         | 1.33E-23 | -0.309128337 | 0.134 | 0.243 | 3.20E-19 | 1.2 |
| RASSF3            | 1.46E-23 | 0.326015102  | 0.218 | 0.13  | 3.51E-19 | 1.2 |
| SLPI              | 1.57E-23 | 0.4227497    | 0.864 | 0.8   | 3.79E-19 | 1.2 |
| PLSCR2            | 1.74E-23 | 0.255731918  | 0.086 | 0.034 | 4.21E-19 | 1.2 |
| LYN               | 1.75E-23 | -0.38238229  | 0.62  | 0.708 | 4.22E-19 | 1.2 |
| PITPNB            | 1.95E-23 | 0.374628053  | 0.392 | 0.294 | 4.70E-19 | 1.2 |
| H2AFZ             | 2.04E-23 | 0.484430205  | 0.657 | 0.603 | 4.93E-19 | 1.2 |
| EIF3K             | 2.16E-23 | -0.369629227 | 0.378 | 0.501 | 5.22E-19 | 1.2 |

|           |          |              |       |       |          |     |
|-----------|----------|--------------|-------|-------|----------|-----|
| LAMB3     | 2.18E-23 | 0.820007993  | 0.353 | 0.271 | 5.24E-19 | 1.2 |
| KRT17     | 2.49E-23 | 0.31248492   | 0.063 | 0.02  | 6.01E-19 | 1.2 |
| PLA2R1    | 2.88E-23 | -0.333735856 | 0.152 | 0.263 | 6.95E-19 | 1.2 |
| RPL32     | 3.00E-23 | -0.205120024 | 0.991 | 0.983 | 7.24E-19 | 1.2 |
| PARK2     | 3.52E-23 | -0.340662055 | 0.092 | 0.187 | 8.50E-19 | 1.2 |
| ADAMTS9-  | 3.57E-23 | 0.449712433  | 0.398 | 0.298 | 8.61E-19 | 1.2 |
| PRKCE     | 4.05E-23 | -0.395629194 | 0.125 | 0.228 | 9.78E-19 | 1.2 |
| DYRK1A    | 4.10E-23 | -0.397411857 | 0.264 | 0.385 | 9.90E-19 | 1.2 |
| PRDX3     | 4.79E-23 | -0.273491564 | 0.08  | 0.171 | 1.15E-18 | 1.2 |
| C10orf10  | 5.35E-23 | -0.291815942 | 0.115 | 0.219 | 1.29E-18 | 1.2 |
| PARD3B    | 6.56E-23 | -0.305504322 | 0.066 | 0.15  | 1.58E-18 | 1.2 |
| MCTS1     | 7.53E-23 | -0.284347561 | 0.197 | 0.316 | 1.82E-18 | 1.2 |
| ASS1      | 8.24E-23 | -0.300953929 | 0.087 | 0.18  | 1.99E-18 | 1.2 |
| BBOX1     | 8.43E-23 | -0.438289554 | 0.179 | 0.289 | 2.03E-18 | 1.2 |
| NPAS3     | 1.14E-22 | -0.362604247 | 0.091 | 0.182 | 2.74E-18 | 1.2 |
| COA1      | 1.54E-22 | -0.27313683  | 0.182 | 0.299 | 3.70E-18 | 1.2 |
| HIST2H2BE | 1.59E-22 | -0.261215098 | 0.037 | 0.11  | 3.83E-18 | 1.2 |
| ARHGAP44  | 1.69E-22 | -0.328231667 | 0.158 | 0.267 | 4.07E-18 | 1.2 |
| ABCA5     | 2.11E-22 | -0.249939223 | 0.056 | 0.138 | 5.09E-18 | 1.2 |
| BRE       | 2.23E-22 | -0.275046197 | 0.099 | 0.194 | 5.39E-18 | 1.2 |
| ZBTB38    | 2.28E-22 | 0.360747044  | 0.396 | 0.299 | 5.49E-18 | 1.2 |
| IRF2BPL   | 2.51E-22 | -0.237118405 | 0.063 | 0.147 | 6.06E-18 | 1.2 |
| ECHDC2    | 3.19E-22 | -0.264721774 | 0.054 | 0.134 | 7.70E-18 | 1.2 |
| BMPR1A    | 3.37E-22 | -0.325777513 | 0.195 | 0.31  | 8.11E-18 | 1.2 |
| CBLC      | 3.56E-22 | 0.262739624  | 0.119 | 0.057 | 8.59E-18 | 1.2 |
| ARFGEF2   | 3.61E-22 | -0.314396099 | 0.237 | 0.359 | 8.70E-18 | 1.2 |
| SPX       | 3.84E-22 | -0.188296562 | 0.006 | 0.057 | 9.26E-18 | 1.2 |
| CGNL1     | 3.91E-22 | -0.267454797 | 0.067 | 0.152 | 9.44E-18 | 1.2 |
| HSD17B2   | 4.00E-22 | -0.202841506 | 0.019 | 0.08  | 9.63E-18 | 1.2 |
| NNMT      | 4.01E-22 | -0.408031998 | 0.031 | 0.098 | 9.68E-18 | 1.2 |
| CTSV      | 4.47E-22 | 0.443865583  | 0.294 | 0.199 | 1.08E-17 | 1.2 |
| WNT2B     | 6.37E-22 | 0.287362834  | 0.1   | 0.045 | 1.54E-17 | 1.2 |
| CCDC25    | 7.57E-22 | -0.224597661 | 0.053 | 0.131 | 1.82E-17 | 1.2 |
| JPX       | 9.68E-22 | -0.272087098 | 0.171 | 0.284 | 2.33E-17 | 1.2 |
| INTS10    | 1.02E-21 | -0.247845878 | 0.052 | 0.129 | 2.47E-17 | 1.2 |
| RP11-266O | 1.29E-21 | -0.310833742 | 0.009 | 0.062 | 3.11E-17 | 1.2 |
| FBN1      | 1.40E-21 | -0.228471509 | 0.009 | 0.061 | 3.36E-17 | 1.2 |
| MRPS21    | 1.46E-21 | -0.292388023 | 0.422 | 0.548 | 3.51E-17 | 1.2 |
| LINC01198 | 1.71E-21 | -0.351698587 | 0.225 | 0.34  | 4.13E-17 | 1.2 |
| ENOSF1    | 1.77E-21 | -0.311004699 | 0.141 | 0.244 | 4.28E-17 | 1.2 |
| VWA8      | 1.81E-21 | -0.236641753 | 0.02  | 0.08  | 4.37E-17 | 1.2 |
| AKR1C2    | 2.29E-21 | -0.266434781 | 0.027 | 0.091 | 5.52E-17 | 1.2 |
| KNOP1     | 2.38E-21 | -0.240954094 | 0.093 | 0.185 | 5.75E-17 | 1.2 |
| TCEB1     | 2.42E-21 | 0.434573429  | 0.366 | 0.276 | 5.84E-17 | 1.2 |
| CDKAL1    | 2.65E-21 | -0.337949199 | 0.164 | 0.269 | 6.40E-17 | 1.2 |
| HINT1     | 2.75E-21 | -0.306695325 | 0.594 | 0.686 | 6.64E-17 | 1.2 |
| GTF2IRD1  | 3.14E-21 | 0.328295627  | 0.21  | 0.129 | 7.57E-17 | 1.2 |

|           |          |              |       |       |          |     |
|-----------|----------|--------------|-------|-------|----------|-----|
| NTRK2     | 3.21E-21 | -0.287659023 | 0.112 | 0.209 | 7.73E-17 | 1.2 |
| LSM5      | 3.23E-21 | -0.289517566 | 0.339 | 0.464 | 7.79E-17 | 1.2 |
| GAB1      | 3.65E-21 | -0.450715729 | 0.274 | 0.387 | 8.79E-17 | 1.2 |
| LPP       | 4.19E-21 | 0.255073425  | 0.904 | 0.885 | 1.01E-16 | 1.2 |
| RGS2      | 5.14E-21 | -0.70671513  | 0.137 | 0.232 | 1.24E-16 | 1.2 |
| ROPN1B    | 5.82E-21 | -0.309769039 | 0.07  | 0.15  | 1.40E-16 | 1.2 |
| HELB      | 6.30E-21 | -0.274676004 | 0.061 | 0.139 | 1.52E-16 | 1.2 |
| TMTC2     | 6.37E-21 | -0.334941336 | 0.221 | 0.336 | 1.54E-16 | 1.2 |
| STAC2     | 7.53E-21 | -0.241306598 | 0.009 | 0.06  | 1.82E-16 | 1.2 |
| COMMD10   | 8.35E-21 | -0.273906315 | 0.132 | 0.232 | 2.01E-16 | 1.2 |
| FMNL2     | 9.91E-21 | 0.376087344  | 0.508 | 0.423 | 2.39E-16 | 1.2 |
| RHOA      | 1.12E-20 | 0.361176496  | 0.484 | 0.403 | 2.70E-16 | 1.2 |
| RP11-739G | 1.32E-20 | -0.313937144 | 0.005 | 0.051 | 3.19E-16 | 1.2 |
| RIN2      | 1.33E-20 | -0.331970909 | 0.225 | 0.336 | 3.20E-16 | 1.2 |
| METAP2    | 1.36E-20 | -0.266355741 | 0.263 | 0.383 | 3.29E-16 | 1.2 |
| TANC2     | 1.54E-20 | 0.379518665  | 0.364 | 0.27  | 3.70E-16 | 1.2 |
| PIK3C2G   | 1.59E-20 | -0.322148305 | 0.049 | 0.121 | 3.84E-16 | 1.2 |
| CCDC14    | 1.82E-20 | -0.255106899 | 0.077 | 0.16  | 4.38E-16 | 1.2 |
| SPIDR     | 2.34E-20 | -0.32865584  | 0.502 | 0.617 | 5.64E-16 | 1.2 |
| BLZF1     | 2.41E-20 | 0.289639701  | 0.142 | 0.077 | 5.80E-16 | 1.2 |
| UBA52     | 2.68E-20 | -0.187347246 | 0.952 | 0.956 | 6.45E-16 | 1.2 |
| UBB       | 2.81E-20 | -0.240972153 | 0.7   | 0.797 | 6.78E-16 | 1.2 |
| OAT       | 2.84E-20 | -0.307950293 | 0.285 | 0.398 | 6.85E-16 | 1.2 |
| IDH2      | 2.84E-20 | -0.22283648  | 0.036 | 0.102 | 6.86E-16 | 1.2 |
| CD46      | 3.00E-20 | -0.326346688 | 0.332 | 0.455 | 7.25E-16 | 1.2 |
| CDKN1A    | 3.03E-20 | 0.164411145  | 0.058 | 0.02  | 7.31E-16 | 1.2 |
| FAM107B   | 3.07E-20 | 0.373020875  | 0.314 | 0.225 | 7.40E-16 | 1.2 |
| DNAJC6    | 3.58E-20 | 0.320831737  | 0.153 | 0.086 | 8.63E-16 | 1.2 |
| BTF3      | 3.83E-20 | -0.265013884 | 0.943 | 0.947 | 9.24E-16 | 1.2 |
| SMYD3     | 4.00E-20 | -0.379390263 | 0.155 | 0.252 | 9.65E-16 | 1.2 |
| KRT15     | 4.11E-20 | 0.242071792  | 0.428 | 0.317 | 9.92E-16 | 1.2 |
| IFITM3    | 4.38E-20 | -0.346671373 | 0.176 | 0.277 | 1.06E-15 | 1.2 |
| PDZK1IP1  | 4.44E-20 | -0.305702265 | 0.101 | 0.192 | 1.07E-15 | 1.2 |
| SAMD12    | 5.63E-20 | -0.317095378 | 0.181 | 0.286 | 1.36E-15 | 1.2 |
| RPL6      | 5.70E-20 | -0.197622009 | 0.976 | 0.966 | 1.37E-15 | 1.2 |
| PDZRN3    | 6.30E-20 | -0.313125772 | 0.115 | 0.206 | 1.52E-15 | 1.2 |
| TNFRSF11B | 6.40E-20 | 0.347200771  | 0.159 | 0.09  | 1.54E-15 | 1.2 |
| DARS      | 6.45E-20 | -0.273255057 | 0.241 | 0.356 | 1.56E-15 | 1.2 |
| GLS       | 6.46E-20 | 0.435749452  | 0.325 | 0.239 | 1.56E-15 | 1.2 |
| LAP3      | 6.74E-20 | -0.279204997 | 0.107 | 0.198 | 1.63E-15 | 1.2 |
| ZNF33A    | 6.74E-20 | -0.254089124 | 0.168 | 0.272 | 1.63E-15 | 1.2 |
| DIAPH1    | 6.83E-20 | 0.338851172  | 0.28  | 0.194 | 1.65E-15 | 1.2 |
| HES1      | 7.31E-20 | -0.335836272 | 0.168 | 0.271 | 1.76E-15 | 1.2 |
| LNX1      | 7.55E-20 | -0.240102924 | 0.041 | 0.109 | 1.82E-15 | 1.2 |
| PRKAG2    | 7.88E-20 | -0.313640074 | 0.098 | 0.185 | 1.90E-15 | 1.2 |
| POLR2G    | 8.33E-20 | -0.238894323 | 0.103 | 0.193 | 2.01E-15 | 1.2 |
| RP11-314N | 8.36E-20 | 0.373244165  | 0.208 | 0.129 | 2.02E-15 | 1.2 |

|           |          |              |       |       |          |     |
|-----------|----------|--------------|-------|-------|----------|-----|
| TUBB6     | 8.60E-20 | 0.206208965  | 0.095 | 0.043 | 2.07E-15 | 1.2 |
| PTGR1     | 9.30E-20 | -0.238176002 | 0.176 | 0.283 | 2.24E-15 | 1.2 |
| KCTD3     | 9.47E-20 | -0.305078203 | 0.127 | 0.221 | 2.28E-15 | 1.2 |
| C3        | 1.03E-19 | -0.351171346 | 0.219 | 0.328 | 2.49E-15 | 1.2 |
| RNF150    | 1.25E-19 | -0.326331948 | 0.074 | 0.154 | 3.02E-15 | 1.2 |
| RELB      | 1.39E-19 | -0.246417742 | 0.085 | 0.169 | 3.35E-15 | 1.2 |
| RBFOX2    | 1.94E-19 | 0.257473541  | 0.969 | 0.962 | 4.68E-15 | 1.2 |
| CAB39L    | 2.33E-19 | -0.283415489 | 0.056 | 0.129 | 5.61E-15 | 1.2 |
| MARCO     | 2.85E-19 | -0.245400426 | 0.046 | 0.114 | 6.88E-15 | 1.2 |
| CSGALNAC  | 3.08E-19 | -0.23862514  | 0.039 | 0.104 | 7.44E-15 | 1.2 |
| NOCT      | 3.38E-19 | -0.3288855   | 0.078 | 0.156 | 8.16E-15 | 1.2 |
| CA2       | 3.39E-19 | 0.289862797  | 0.112 | 0.056 | 8.19E-15 | 1.2 |
| ZNF608    | 3.55E-19 | -0.294260967 | 0.099 | 0.184 | 8.55E-15 | 1.2 |
| GABRP     | 3.69E-19 | 0.430944571  | 0.594 | 0.537 | 8.91E-15 | 1.2 |
| EIF3L     | 3.77E-19 | -0.248388375 | 0.7   | 0.779 | 9.10E-15 | 1.2 |
| LINC-PINT | 3.84E-19 | -0.403430867 | 0.461 | 0.569 | 9.26E-15 | 1.2 |
| RPS4X     | 3.90E-19 | -0.160184176 | 0.992 | 0.981 | 9.40E-15 | 1.2 |
| UQCRC2    | 3.92E-19 | -0.286283225 | 0.36  | 0.473 | 9.45E-15 | 1.2 |
| SLC24A3   | 4.02E-19 | -0.267724503 | 0.095 | 0.181 | 9.68E-15 | 1.2 |
| HIST1H2BD | 4.29E-19 | -0.378434812 | 0.202 | 0.304 | 1.03E-14 | 1.2 |
| C4orf19   | 4.61E-19 | -0.311889819 | 0.118 | 0.208 | 1.11E-14 | 1.2 |
| DYNLT3    | 5.81E-19 | 0.352438122  | 0.28  | 0.2   | 1.40E-14 | 1.2 |
| ZFAND3    | 6.93E-19 | 0.306387265  | 0.68  | 0.626 | 1.67E-14 | 1.2 |
| ADK       | 7.24E-19 | 0.354616746  | 0.517 | 0.439 | 1.75E-14 | 1.2 |
| CASC15    | 7.35E-19 | 0.470700267  | 0.421 | 0.334 | 1.77E-14 | 1.2 |
| ADGRL2    | 8.57E-19 | -0.30042136  | 0.067 | 0.141 | 2.07E-14 | 1.2 |
| F11R      | 8.66E-19 | 0.294350637  | 0.238 | 0.158 | 2.09E-14 | 1.2 |
| MIR646HG  | 8.96E-19 | -0.257820601 | 0.044 | 0.11  | 2.16E-14 | 1.2 |
| ADGRF1    | 9.40E-19 | -0.172287092 | 0.019 | 0.073 | 2.27E-14 | 1.2 |
| GPHN      | 9.81E-19 | -0.25042617  | 0.208 | 0.317 | 2.36E-14 | 1.2 |
| HNMT      | 9.89E-19 | -0.278195185 | 0.152 | 0.248 | 2.38E-14 | 1.2 |
| CACHD1    | 1.06E-18 | -0.238020341 | 0.04  | 0.105 | 2.55E-14 | 1.2 |
| CAV1      | 1.17E-18 | 0.284814638  | 0.101 | 0.049 | 2.83E-14 | 1.2 |
| R3HDM2    | 1.24E-18 | -0.28484848  | 0.089 | 0.171 | 2.98E-14 | 1.2 |
| ANGPTL1   | 1.34E-18 | 0.289783072  | 0.119 | 0.063 | 3.22E-14 | 1.2 |
| RAP2B     | 1.42E-18 | 0.270548707  | 0.255 | 0.172 | 3.41E-14 | 1.2 |
| RP11-244N | 1.42E-18 | -0.301077504 | 0.473 | 0.574 | 3.42E-14 | 1.2 |
| SYNE2     | 1.43E-18 | -0.261734957 | 0.415 | 0.536 | 3.45E-14 | 1.2 |
| CLCN3     | 1.55E-18 | -0.262028814 | 0.119 | 0.207 | 3.74E-14 | 1.2 |
| SOX10     | 1.71E-18 | -0.282506544 | 0.07  | 0.144 | 4.11E-14 | 1.2 |
| PLS3      | 1.78E-18 | 0.274200749  | 0.164 | 0.096 | 4.29E-14 | 1.2 |
| TM4SF1    | 1.83E-18 | 0.242369625  | 0.917 | 0.892 | 4.41E-14 | 1.2 |
| TNFAIP3   | 1.87E-18 | 0.337283464  | 0.322 | 0.234 | 4.50E-14 | 1.2 |
| ENTPD1-AS | 1.93E-18 | -0.212747536 | 0.026 | 0.083 | 4.64E-14 | 1.2 |
| HIBCH     | 1.94E-18 | -0.232201953 | 0.084 | 0.164 | 4.69E-14 | 1.2 |
| RAB8B     | 2.01E-18 | 0.31543428   | 0.225 | 0.148 | 4.84E-14 | 1.2 |
| MYRFL     | 2.02E-18 | 0.300664357  | 0.117 | 0.061 | 4.88E-14 | 1.2 |

|            |          |              |       |       |          |     |
|------------|----------|--------------|-------|-------|----------|-----|
| KRT14      | 2.10E-18 | 0.133876008  | 0.03  | 0.006 | 5.05E-14 | 1.2 |
| TMCO1      | 2.17E-18 | -0.241132048 | 0.246 | 0.353 | 5.23E-14 | 1.2 |
| RP11-519G  | 2.23E-18 | -0.302939384 | 0.043 | 0.107 | 5.37E-14 | 1.2 |
| ATP5F1     | 2.38E-18 | -0.280094717 | 0.378 | 0.493 | 5.73E-14 | 1.2 |
| LIMCH1     | 2.50E-18 | -0.247048898 | 0.186 | 0.291 | 6.04E-14 | 1.2 |
| NKX3-1     | 2.77E-18 | 0.277746191  | 0.137 | 0.075 | 6.69E-14 | 1.2 |
| EBP        | 2.97E-18 | -0.210920503 | 0.051 | 0.12  | 7.15E-14 | 1.2 |
| NR2F2      | 3.14E-18 | -0.209138591 | 0.043 | 0.108 | 7.58E-14 | 1.2 |
| ARPC3      | 3.51E-18 | -0.226977662 | 0.581 | 0.692 | 8.46E-14 | 1.2 |
| MAP3K1     | 3.79E-18 | -0.290097938 | 0.14  | 0.232 | 9.15E-14 | 1.2 |
| SGCZ       | 4.74E-18 | -0.312722116 | 0.038 | 0.099 | 1.14E-13 | 1.2 |
| TEX14      | 4.97E-18 | -0.429746389 | 0.181 | 0.274 | 1.20E-13 | 1.2 |
| CCDC50     | 5.48E-18 | 0.288340169  | 0.215 | 0.139 | 1.32E-13 | 1.2 |
| AC159540.  | 5.69E-18 | 0.404949749  | 0.233 | 0.158 | 1.37E-13 | 1.2 |
| MRPL40     | 6.06E-18 | -0.197614141 | 0.051 | 0.117 | 1.46E-13 | 1.2 |
| CD2AP      | 6.87E-18 | 0.25385777   | 0.455 | 0.364 | 1.66E-13 | 1.2 |
| AKAP6      | 6.94E-18 | -0.184739512 | 0.014 | 0.063 | 1.67E-13 | 1.2 |
| PTPN2      | 8.12E-18 | -0.27318219  | 0.288 | 0.397 | 1.96E-13 | 1.2 |
| FANCL      | 8.35E-18 | -0.174164842 | 0.034 | 0.094 | 2.01E-13 | 1.2 |
| KIAA1324   | 8.49E-18 | -0.227906435 | 0.055 | 0.123 | 2.05E-13 | 1.2 |
| RP11-141O  | 8.67E-18 | -0.168737277 | 0.005 | 0.045 | 2.09E-13 | 1.2 |
| TACC2      | 8.79E-18 | -0.233066678 | 0.088 | 0.166 | 2.12E-13 | 1.2 |
| ERC1       | 9.69E-18 | 0.339116139  | 0.361 | 0.278 | 2.34E-13 | 1.2 |
| ATF7IP     | 1.06E-17 | -0.290144986 | 0.108 | 0.193 | 2.56E-13 | 1.2 |
| ARID5B     | 1.09E-17 | -0.263572257 | 0.672 | 0.766 | 2.63E-13 | 1.2 |
| NFE2L3     | 1.13E-17 | 0.3806515    | 0.139 | 0.079 | 2.72E-13 | 1.2 |
| SMARCD3    | 1.16E-17 | -0.1584747   | 0.005 | 0.045 | 2.80E-13 | 1.2 |
| AL109761.! | 1.21E-17 | -0.147983159 | 0.009 | 0.052 | 2.92E-13 | 1.2 |
| PRDM2      | 1.22E-17 | -0.236020597 | 0.229 | 0.337 | 2.93E-13 | 1.2 |
| RPL7A      | 1.25E-17 | -0.192567983 | 0.985 | 0.973 | 3.02E-13 | 1.2 |
| GMDS-AS1   | 1.27E-17 | -0.315806938 | 0.063 | 0.132 | 3.05E-13 | 1.2 |
| EDN1       | 1.30E-17 | 0.309878238  | 0.277 | 0.194 | 3.12E-13 | 1.2 |
| ANKRD36B   | 1.32E-17 | 0.311391844  | 0.17  | 0.103 | 3.18E-13 | 1.2 |
| MGP        | 1.33E-17 | 0.130633485  | 0.896 | 0.861 | 3.20E-13 | 1.2 |
| SERPIN5    | 1.35E-17 | 0.174959861  | 0.052 | 0.018 | 3.26E-13 | 1.2 |
| LINC01122  | 1.38E-17 | -0.251248063 | 0.024 | 0.078 | 3.32E-13 | 1.2 |
| DANT2      | 1.66E-17 | -0.201364134 | 0.037 | 0.097 | 4.01E-13 | 1.2 |
| TUBA1C     | 1.67E-17 | 0.356245971  | 0.416 | 0.342 | 4.02E-13 | 1.2 |
| MBP        | 1.68E-17 | 0.3345353    | 0.234 | 0.159 | 4.04E-13 | 1.2 |
| IQGAP2     | 1.96E-17 | -0.205478505 | 0.031 | 0.088 | 4.72E-13 | 1.2 |
| CADM1      | 1.97E-17 | -0.240976885 | 0.039 | 0.1   | 4.75E-13 | 1.2 |
| TMEM135    | 2.02E-17 | -0.195399433 | 0.032 | 0.09  | 4.87E-13 | 1.2 |
| RPL4       | 2.05E-17 | -0.211505546 | 0.951 | 0.959 | 4.95E-13 | 1.2 |
| LAMC1      | 2.08E-17 | 0.321793897  | 0.33  | 0.248 | 5.02E-13 | 1.2 |
| TBC1D4     | 2.27E-17 | -0.22382396  | 0.082 | 0.159 | 5.47E-13 | 1.2 |
| GLYATL2    | 2.28E-17 | -0.157425018 | 0.03  | 0.087 | 5.50E-13 | 1.2 |
| PI3        | 2.31E-17 | 0.966924933  | 0.358 | 0.278 | 5.58E-13 | 1.2 |

|           |          |              |       |       |          |     |
|-----------|----------|--------------|-------|-------|----------|-----|
| MAGED1    | 2.50E-17 | -0.228052458 | 0.056 | 0.124 | 6.03E-13 | 1.2 |
| PSD3      | 2.64E-17 | 0.394286424  | 0.266 | 0.19  | 6.37E-13 | 1.2 |
| UBE2E3    | 2.65E-17 | -0.246516758 | 0.11  | 0.194 | 6.39E-13 | 1.2 |
| DECR1     | 2.85E-17 | -0.228138692 | 0.085 | 0.162 | 6.86E-13 | 1.2 |
| RP11-96H1 | 3.07E-17 | -0.279004899 | 0.06  | 0.128 | 7.41E-13 | 1.2 |
| CYP1B1-AS | 3.14E-17 | -0.152326166 | 0.007 | 0.048 | 7.57E-13 | 1.2 |
| ANAPC16   | 3.28E-17 | -0.226560215 | 0.208 | 0.309 | 7.90E-13 | 1.2 |
| RPL7      | 3.54E-17 | -0.385859402 | 0.958 | 0.96  | 8.53E-13 | 1.2 |
| NMT1      | 4.39E-17 | -0.25995515  | 0.125 | 0.21  | 1.06E-12 | 1.2 |
| C1orf21   | 4.46E-17 | 0.30169524   | 0.289 | 0.206 | 1.07E-12 | 1.2 |
| FNBP1L    | 4.51E-17 | -0.399535073 | 0.357 | 0.456 | 1.09E-12 | 1.2 |
| PRLR      | 4.55E-17 | -0.226797107 | 0.075 | 0.149 | 1.10E-12 | 1.2 |
| GALNT15   | 5.40E-17 | -0.336277375 | 0.085 | 0.16  | 1.30E-12 | 1.2 |
| LINC01235 | 5.45E-17 | -0.230261839 | 0.128 | 0.216 | 1.32E-12 | 1.2 |
| SH3RF2    | 5.47E-17 | 0.169398101  | 0.047 | 0.016 | 1.32E-12 | 1.2 |
| HCAR2     | 5.60E-17 | 0.440085248  | 0.261 | 0.184 | 1.35E-12 | 1.2 |
| TMCO4     | 5.62E-17 | -0.187643502 | 0.048 | 0.112 | 1.36E-12 | 1.2 |
| VMP1      | 5.91E-17 | 0.270192678  | 0.801 | 0.773 | 1.42E-12 | 1.2 |
| GRHL1     | 6.12E-17 | -0.26970121  | 0.179 | 0.276 | 1.48E-12 | 1.2 |
| TM4SF18   | 6.38E-17 | -0.257606216 | 0.041 | 0.1   | 1.54E-12 | 1.2 |
| MRPS33    | 6.49E-17 | -0.261063762 | 0.23  | 0.33  | 1.57E-12 | 1.2 |
| MTHFD2    | 6.68E-17 | 0.2354505    | 0.132 | 0.074 | 1.61E-12 | 1.2 |
| SPOCD1    | 7.09E-17 | 0.111074909  | 0.036 | 0.01  | 1.71E-12 | 1.2 |
| SUCLG2    | 7.35E-17 | -0.2101504   | 0.049 | 0.112 | 1.77E-12 | 1.2 |
| IDI1      | 7.63E-17 | -0.26582514  | 0.147 | 0.235 | 1.84E-12 | 1.2 |
| BAIAP2L1  | 8.16E-17 | -0.389958931 | 0.971 | 0.966 | 1.97E-12 | 1.2 |
| JAK2      | 8.22E-17 | -0.312282979 | 0.038 | 0.096 | 1.98E-12 | 1.2 |
| GPRC5B    | 8.23E-17 | -0.187843535 | 0.025 | 0.077 | 1.99E-12 | 1.2 |
| AGO2      | 8.30E-17 | 0.291749647  | 0.238 | 0.162 | 2.00E-12 | 1.2 |
| LIMK2     | 8.56E-17 | -0.218322428 | 0.073 | 0.144 | 2.06E-12 | 1.2 |
| USMG5     | 9.47E-17 | 0.288757848  | 0.642 | 0.572 | 2.28E-12 | 1.2 |
| MT-CYB    | 1.14E-16 | -0.137844461 | 0.992 | 0.988 | 2.75E-12 | 1.2 |
| TPI1      | 1.66E-16 | 0.357981965  | 0.433 | 0.355 | 4.00E-12 | 1.2 |
| GXYLT2    | 1.71E-16 | -0.217247802 | 0.041 | 0.1   | 4.12E-12 | 1.2 |
| IRF6      | 1.79E-16 | 0.350745857  | 0.281 | 0.204 | 4.32E-12 | 1.2 |
| KRT80     | 1.94E-16 | 0.168374588  | 0.074 | 0.032 | 4.67E-12 | 1.2 |
| NFIL3     | 1.94E-16 | -0.284453414 | 0.097 | 0.172 | 4.68E-12 | 1.2 |
| TPST1     | 2.11E-16 | -0.312176836 | 0.089 | 0.162 | 5.09E-12 | 1.2 |
| IFRD1     | 2.24E-16 | -0.352487788 | 0.304 | 0.4   | 5.41E-12 | 1.2 |
| NUDT5     | 2.32E-16 | -0.20456931  | 0.118 | 0.202 | 5.59E-12 | 1.2 |
| ARF4      | 2.37E-16 | 0.2750106    | 0.694 | 0.641 | 5.71E-12 | 1.2 |
| SCGB2A2   | 2.52E-16 | 0.776573845  | 0.249 | 0.173 | 6.08E-12 | 1.2 |
| WDPCP     | 2.60E-16 | -0.250449578 | 0.091 | 0.167 | 6.26E-12 | 1.2 |
| NMB       | 2.61E-16 | 0.150046766  | 0.055 | 0.021 | 6.28E-12 | 1.2 |
| CPEB3     | 2.64E-16 | -0.33891013  | 0.257 | 0.356 | 6.37E-12 | 1.2 |
| PLD1      | 2.77E-16 | -0.196534874 | 0.049 | 0.112 | 6.67E-12 | 1.2 |
| TLK1      | 2.82E-16 | -0.231523706 | 0.139 | 0.226 | 6.80E-12 | 1.2 |

|           |          |              |       |       |          |     |
|-----------|----------|--------------|-------|-------|----------|-----|
| NSMCE1    | 2.98E-16 | -0.181921405 | 0.063 | 0.13  | 7.18E-12 | 1.2 |
| LBP       | 3.26E-16 | -0.222772286 | 0.005 | 0.043 | 7.86E-12 | 1.2 |
| ATP5G2    | 3.67E-16 | -0.276993407 | 0.733 | 0.8   | 8.85E-12 | 1.2 |
| KCCAT211  | 3.80E-16 | -0.239304126 | 0.018 | 0.065 | 9.17E-12 | 1.2 |
| LINC00998 | 3.82E-16 | -0.189591305 | 0.105 | 0.187 | 9.21E-12 | 1.2 |
| HIBADH    | 3.82E-16 | -0.256755639 | 0.128 | 0.211 | 9.22E-12 | 1.2 |
| CCDC53    | 4.47E-16 | -0.168064502 | 0.04  | 0.098 | 1.08E-11 | 1.2 |
| GNB1      | 4.53E-16 | 0.286998291  | 0.35  | 0.272 | 1.09E-11 | 1.2 |
| PNPLA8    | 6.12E-16 | 0.288201516  | 0.355 | 0.271 | 1.48E-11 | 1.2 |
| QKI       | 6.23E-16 | -0.358972746 | 0.462 | 0.557 | 1.50E-11 | 1.2 |
| DSP       | 6.56E-16 | 0.343446983  | 0.399 | 0.327 | 1.58E-11 | 1.2 |
| SLC38A1   | 6.72E-16 | 0.299244366  | 0.349 | 0.268 | 1.62E-11 | 1.2 |
| EXOC4     | 6.73E-16 | -0.277494924 | 0.217 | 0.316 | 1.62E-11 | 1.2 |
| MINA      | 6.93E-16 | -0.169208516 | 0.034 | 0.088 | 1.67E-11 | 1.2 |
| THRB      | 7.02E-16 | -0.238423011 | 0.221 | 0.318 | 1.69E-11 | 1.2 |
| ZMYM4     | 7.11E-16 | -0.218485909 | 0.876 | 0.904 | 1.71E-11 | 1.2 |
| ZNF429    | 7.22E-16 | -0.183552143 | 0.037 | 0.094 | 1.74E-11 | 1.2 |
| IDS       | 7.23E-16 | 0.145063399  | 0.077 | 0.035 | 1.74E-11 | 1.2 |
| VAPA      | 7.31E-16 | -0.260012599 | 0.394 | 0.505 | 1.76E-11 | 1.2 |
| VAV3      | 7.37E-16 | -0.271318433 | 0.09  | 0.164 | 1.78E-11 | 1.2 |
| ATP13A5   | 7.51E-16 | -0.182813105 | 0.013 | 0.056 | 1.81E-11 | 1.2 |
| PCCA      | 7.96E-16 | -0.261379784 | 0.1   | 0.177 | 1.92E-11 | 1.2 |
| C15orf48  | 8.03E-16 | -0.747762585 | 0.431 | 0.503 | 1.94E-11 | 1.2 |
| GANC      | 8.24E-16 | -0.185548094 | 0.055 | 0.118 | 1.99E-11 | 1.2 |
| ARNTL2    | 8.32E-16 | 0.269218256  | 0.189 | 0.121 | 2.01E-11 | 1.2 |
| KREMEN1   | 8.96E-16 | -0.190807158 | 0.032 | 0.086 | 2.16E-11 | 1.2 |
| RPL11     | 9.60E-16 | -0.164951599 | 0.987 | 0.979 | 2.32E-11 | 1.2 |
| KIAA0319L | 9.90E-16 | -0.255735269 | 0.104 | 0.181 | 2.39E-11 | 1.2 |
| ESD       | 9.96E-16 | -0.268017429 | 0.374 | 0.479 | 2.40E-11 | 1.2 |
| CLDN8     | 1.04E-15 | -0.201557344 | 0.042 | 0.1   | 2.50E-11 | 1.2 |
| PAM       | 1.11E-15 | 0.270292909  | 0.626 | 0.572 | 2.67E-11 | 1.2 |
| OGFRL1    | 1.13E-15 | -0.223331672 | 0.173 | 0.264 | 2.72E-11 | 1.2 |
| SDHC      | 1.15E-15 | -0.184873594 | 0.091 | 0.166 | 2.77E-11 | 1.2 |
| KRT81     | 1.15E-15 | 0.322474748  | 0.062 | 0.026 | 2.78E-11 | 1.2 |
| BICD1     | 1.28E-15 | -0.305176548 | 0.131 | 0.213 | 3.09E-11 | 1.2 |
| OCIAD1    | 1.31E-15 | -0.22739874  | 0.202 | 0.298 | 3.16E-11 | 1.2 |
| NDUFA4    | 1.32E-15 | -0.209467609 | 0.748 | 0.816 | 3.19E-11 | 1.2 |
| TRAF1     | 1.44E-15 | 0.27505257   | 0.105 | 0.056 | 3.48E-11 | 1.2 |
| LINC01344 | 1.48E-15 | -0.177395921 | 0.011 | 0.051 | 3.56E-11 | 1.2 |
| ARL4A     | 1.49E-15 | -0.227491045 | 0.079 | 0.149 | 3.58E-11 | 1.2 |
| LINC00969 | 1.53E-15 | 0.304201985  | 0.33  | 0.254 | 3.68E-11 | 1.2 |
| FAM20C    | 1.63E-15 | -0.263026614 | 0.053 | 0.115 | 3.92E-11 | 1.2 |
| PLPP3     | 1.74E-15 | -0.348640077 | 0.161 | 0.245 | 4.19E-11 | 1.2 |
| MAST4     | 1.85E-15 | -0.395094338 | 0.311 | 0.404 | 4.47E-11 | 1.2 |
| TPM1      | 1.97E-15 | 0.275088206  | 0.646 | 0.594 | 4.75E-11 | 1.2 |
| H1FO      | 1.98E-15 | -0.224791069 | 0.111 | 0.189 | 4.77E-11 | 1.2 |
| NDUFA5    | 2.26E-15 | -0.241518421 | 0.222 | 0.321 | 5.46E-11 | 1.2 |



|            |          |              |       |       |          |     |
|------------|----------|--------------|-------|-------|----------|-----|
| C1RL       | 2.30E-15 | -0.238553342 | 0.07  | 0.136 | 5.56E-11 | 1.2 |
| NFIX       | 2.37E-15 | -0.262652336 | 0.068 | 0.133 | 5.71E-11 | 1.2 |
| C21orf91-C | 2.39E-15 | -0.149393409 | 0.009 | 0.048 | 5.77E-11 | 1.2 |
| NBR1       | 2.56E-15 | -0.161268311 | 0.109 | 0.189 | 6.18E-11 | 1.2 |
| EPPK1      | 2.56E-15 | 0.224128198  | 0.098 | 0.051 | 6.18E-11 | 1.2 |
| GSTA4      | 2.64E-15 | -0.161724144 | 0.029 | 0.08  | 6.36E-11 | 1.2 |
| SUMF1      | 2.65E-15 | -0.223966646 | 0.065 | 0.13  | 6.40E-11 | 1.2 |
| RAP1B      | 2.73E-15 | 0.332016203  | 0.467 | 0.398 | 6.57E-11 | 1.2 |
| CXCL17     | 2.76E-15 | -0.444862283 | 0.125 | 0.201 | 6.65E-11 | 1.2 |
| ABTB2      | 2.76E-15 | 0.336625359  | 0.301 | 0.223 | 6.66E-11 | 1.2 |
| LINGO1     | 3.25E-15 | 0.273994274  | 0.909 | 0.877 | 7.83E-11 | 1.2 |
| COX4I1     | 3.50E-15 | -0.245964568 | 0.733 | 0.798 | 8.44E-11 | 1.2 |
| TNRC6B     | 3.78E-15 | -0.26691378  | 0.334 | 0.442 | 9.11E-11 | 1.2 |
| MYADM      | 3.82E-15 | 0.153815318  | 0.077 | 0.036 | 9.21E-11 | 1.2 |
| BOC        | 3.91E-15 | -0.149704959 | 0.009 | 0.048 | 9.43E-11 | 1.2 |
| KLK5       | 4.21E-15 | 0.190036674  | 0.109 | 0.058 | 1.01E-10 | 1.2 |
| WDR1       | 4.23E-15 | 0.260656298  | 0.193 | 0.128 | 1.02E-10 | 1.2 |
| IQCK       | 4.30E-15 | -0.148199402 | 0.019 | 0.064 | 1.04E-10 | 1.2 |
| ZFAND6     | 4.58E-15 | 0.318643192  | 0.425 | 0.351 | 1.10E-10 | 1.2 |
| PLAC9      | 4.59E-15 | 0.13626628   | 0.044 | 0.015 | 1.11E-10 | 1.2 |
| LURAP1L    | 5.31E-15 | 0.314073869  | 0.279 | 0.206 | 1.28E-10 | 1.2 |
| SVIL       | 5.41E-15 | 0.218045826  | 0.86  | 0.827 | 1.30E-10 | 1.2 |
| TIMM23B    | 5.64E-15 | -0.231855605 | 0.141 | 0.224 | 1.36E-10 | 1.2 |
| CYCS       | 5.75E-15 | 0.334669806  | 0.586 | 0.532 | 1.39E-10 | 1.2 |
| CCAR1      | 5.83E-15 | -0.202535008 | 0.183 | 0.276 | 1.41E-10 | 1.2 |
| SAMD5      | 5.90E-15 | -0.172765956 | 0.024 | 0.071 | 1.42E-10 | 1.2 |
| C4BPB      | 6.16E-15 | -0.147048843 | 0.014 | 0.055 | 1.49E-10 | 1.2 |
| ENPP6      | 6.85E-15 | -0.153582195 | 0.017 | 0.061 | 1.65E-10 | 1.2 |
| SLC7A1     | 7.06E-15 | 0.22553998   | 0.142 | 0.086 | 1.70E-10 | 1.2 |
| LINC01183  | 7.21E-15 | -0.169586428 | 0.023 | 0.07  | 1.74E-10 | 1.2 |
| SLCO1A2    | 7.49E-15 | -0.135346052 | 0.003 | 0.036 | 1.81E-10 | 1.2 |
| NUDCD1     | 7.99E-15 | 0.24800889   | 0.168 | 0.106 | 1.93E-10 | 1.2 |
| ACTG1      | 9.03E-15 | 0.441322522  | 0.731 | 0.688 | 2.18E-10 | 1.2 |
| CCNYL1     | 9.19E-15 | 0.192350079  | 0.113 | 0.063 | 2.22E-10 | 1.2 |
| SUN1       | 9.71E-15 | 0.234639408  | 0.155 | 0.096 | 2.34E-10 | 1.2 |
| ABHD17C    | 9.72E-15 | -0.17182646  | 0.027 | 0.075 | 2.34E-10 | 1.2 |
| COPZ1      | 9.84E-15 | -0.21227134  | 0.271 | 0.372 | 2.37E-10 | 1.2 |
| FRMD6      | 9.97E-15 | -0.314743474 | 0.135 | 0.213 | 2.40E-10 | 1.2 |
| UBTD2      | 1.03E-14 | 0.269270694  | 0.183 | 0.12  | 2.49E-10 | 1.2 |
| RP11-486O  | 1.12E-14 | 0.22549621   | 0.089 | 0.045 | 2.71E-10 | 1.2 |
| LOX        | 1.13E-14 | 0.245278967  | 0.092 | 0.048 | 2.72E-10 | 1.2 |
| SESN2      | 1.19E-14 | 0.247246802  | 0.151 | 0.093 | 2.86E-10 | 1.2 |
| APEX1      | 1.20E-14 | -0.246787612 | 0.19  | 0.279 | 2.90E-10 | 1.2 |
| CTC-340D7  | 1.25E-14 | -0.123808753 | 0.003 | 0.036 | 3.01E-10 | 1.2 |
| OGT        | 1.26E-14 | 0.271540006  | 0.427 | 0.352 | 3.04E-10 | 1.2 |
| GRHL2      | 1.27E-14 | -0.239990538 | 0.203 | 0.295 | 3.05E-10 | 1.2 |
| BBS4       | 1.33E-14 | -0.142957136 | 0.018 | 0.061 | 3.20E-10 | 1.2 |

|           |          |              |       |       |          |     |
|-----------|----------|--------------|-------|-------|----------|-----|
| MCCC2     | 1.37E-14 | -0.187953452 | 0.067 | 0.13  | 3.31E-10 | 1.2 |
| STX17     | 1.39E-14 | -0.17304159  | 0.088 | 0.158 | 3.36E-10 | 1.2 |
| CELF2     | 1.41E-14 | 0.310625992  | 0.308 | 0.233 | 3.40E-10 | 1.2 |
| ZNF280D   | 1.46E-14 | -0.210740457 | 0.057 | 0.116 | 3.53E-10 | 1.2 |
| NUDT7     | 1.55E-14 | -0.123598418 | 0.014 | 0.054 | 3.73E-10 | 1.2 |
| GGA2      | 1.69E-14 | -0.2651789   | 0.097 | 0.165 | 4.07E-10 | 1.2 |
| DDX3X     | 1.70E-14 | 0.310343736  | 0.352 | 0.278 | 4.11E-10 | 1.2 |
| RBBP6     | 1.78E-14 | 0.311018379  | 0.28  | 0.211 | 4.30E-10 | 1.2 |
| HBEGF     | 1.79E-14 | 0.135809571  | 0.049 | 0.019 | 4.33E-10 | 1.2 |
| PEA15     | 1.84E-14 | 0.299442036  | 0.246 | 0.18  | 4.43E-10 | 1.2 |
| CREB1     | 1.86E-14 | 0.250888768  | 0.238 | 0.167 | 4.49E-10 | 1.2 |
| RPS8      | 1.91E-14 | -0.184431526 | 0.727 | 0.788 | 4.61E-10 | 1.2 |
| SH3BGRL3  | 1.92E-14 | 0.372812091  | 0.084 | 0.042 | 4.62E-10 | 1.2 |
| SEMA6A    | 1.96E-14 | -0.268049406 | 0.336 | 0.436 | 4.74E-10 | 1.2 |
| GTPBP4    | 2.51E-14 | 0.277607226  | 0.186 | 0.123 | 6.06E-10 | 1.2 |
| HILPDA    | 2.80E-14 | -0.556628599 | 0.189 | 0.264 | 6.74E-10 | 1.2 |
| CBL       | 3.20E-14 | 0.235397829  | 0.134 | 0.081 | 7.71E-10 | 1.2 |
| NFIB      | 3.22E-14 | -0.15464069  | 0.788 | 0.87  | 7.78E-10 | 1.2 |
| KMT2C     | 3.42E-14 | -0.30649648  | 0.535 | 0.636 | 8.25E-10 | 1.2 |
| LINC01191 | 3.48E-14 | -0.138477753 | 0.022 | 0.066 | 8.39E-10 | 1.2 |
| SRD5A3    | 3.50E-14 | -0.145533875 | 0.021 | 0.065 | 8.44E-10 | 1.2 |
| AC009313. | 3.59E-14 | -0.234358068 | 0.079 | 0.144 | 8.65E-10 | 1.2 |
| NCOA7     | 3.97E-14 | -0.190603361 | 0.597 | 0.695 | 9.58E-10 | 1.2 |
| CCDC170   | 4.12E-14 | -0.15869911  | 0.014 | 0.053 | 9.93E-10 | 1.2 |
| PTK2      | 4.17E-14 | 0.25549576   | 0.609 | 0.552 | 1.01E-09 | 1.2 |
| HIST1H4E  | 4.68E-14 | -0.199997512 | 0.059 | 0.118 | 1.13E-09 | 1.2 |
| NR1D2     | 5.19E-14 | -0.190978429 | 0.112 | 0.188 | 1.25E-09 | 1.2 |
| TGM2      | 5.29E-14 | -0.152059352 | 0.047 | 0.103 | 1.28E-09 | 1.2 |
| GPRC5A    | 5.39E-14 | 0.218735317  | 0.411 | 0.33  | 1.30E-09 | 1.2 |
| UQCRH     | 5.72E-14 | -0.205342945 | 0.832 | 0.86  | 1.38E-09 | 1.2 |
| CRABP2    | 5.80E-14 | 0.226848452  | 0.123 | 0.071 | 1.40E-09 | 1.2 |
| CDC25B    | 6.01E-14 | -0.162142685 | 0.007 | 0.041 | 1.45E-09 | 1.2 |
| ATP6VOE1  | 6.14E-14 | 0.271067813  | 0.686 | 0.662 | 1.48E-09 | 1.2 |
| VPS13B    | 6.33E-14 | -0.205610064 | 0.109 | 0.182 | 1.53E-09 | 1.2 |
| SNED1     | 6.59E-14 | -0.173126712 | 0.024 | 0.068 | 1.59E-09 | 1.2 |
| NUCKS1    | 6.78E-14 | -0.200499145 | 0.234 | 0.329 | 1.64E-09 | 1.2 |
| RNF130    | 6.83E-14 | -0.179858882 | 0.106 | 0.178 | 1.65E-09 | 1.2 |
| USP40     | 6.86E-14 | -0.165736341 | 0.032 | 0.081 | 1.65E-09 | 1.2 |
| DLG5      | 6.92E-14 | -0.285237371 | 0.115 | 0.186 | 1.67E-09 | 1.2 |
| HNRNPA1   | 7.02E-14 | -0.21459149  | 0.862 | 0.904 | 1.69E-09 | 1.2 |
| BID       | 7.12E-14 | 0.272353563  | 0.196 | 0.133 | 1.72E-09 | 1.2 |
| HP        | 7.19E-14 | -0.451520523 | 0.004 | 0.036 | 1.73E-09 | 1.2 |
| SMAD3     | 7.40E-14 | 0.249767018  | 0.171 | 0.11  | 1.78E-09 | 1.2 |
| NBAT1     | 7.50E-14 | 0.22758738   | 0.121 | 0.07  | 1.81E-09 | 1.2 |
| CITED2    | 7.59E-14 | -0.136606218 | 0.019 | 0.062 | 1.83E-09 | 1.2 |
| FBXL2     | 8.48E-14 | 0.225591445  | 0.144 | 0.088 | 2.05E-09 | 1.2 |
| MRAS      | 8.74E-14 | -0.15548013  | 0.037 | 0.087 | 2.11E-09 | 1.2 |

|           |          |              |       |       |          |     |
|-----------|----------|--------------|-------|-------|----------|-----|
| RASGEF1B  | 9.02E-14 | 0.256564018  | 0.907 | 0.891 | 2.17E-09 | 1.2 |
| RPL15     | 9.06E-14 | -0.15792088  | 0.748 | 0.803 | 2.18E-09 | 1.2 |
| PDGFC     | 9.28E-14 | -0.236682658 | 0.211 | 0.3   | 2.24E-09 | 1.2 |
| PLCB4     | 9.83E-14 | -0.185180963 | 0.073 | 0.136 | 2.37E-09 | 1.2 |
| MDH1      | 9.99E-14 | -0.232513473 | 0.288 | 0.384 | 2.41E-09 | 1.2 |
| CP        | 1.00E-13 | -0.206059951 | 0.031 | 0.079 | 2.41E-09 | 1.2 |
| ANKRA2    | 1.01E-13 | -0.150396945 | 0.03  | 0.078 | 2.43E-09 | 1.2 |
| SCGB2B2   | 1.04E-13 | -0.149795169 | 0.025 | 0.07  | 2.51E-09 | 1.2 |
| PPIG      | 1.07E-13 | -0.193879436 | 0.345 | 0.456 | 2.59E-09 | 1.2 |
| LINC01152 | 1.12E-13 | -0.265024912 | 0.077 | 0.14  | 2.70E-09 | 1.2 |
| PDLIM7    | 1.12E-13 | 0.11899511   | 0.052 | 0.021 | 2.71E-09 | 1.2 |
| PRELID1   | 1.13E-13 | -0.179386827 | 0.089 | 0.156 | 2.72E-09 | 1.2 |
| CD63      | 1.20E-13 | 0.330368861  | 0.27  | 0.2   | 2.89E-09 | 1.2 |
| DTWD1     | 1.26E-13 | -0.144824164 | 0.032 | 0.08  | 3.03E-09 | 1.2 |
| CSF3R     | 1.33E-13 | -0.110363979 | 0.008 | 0.043 | 3.22E-09 | 1.2 |
| GNB2L1    | 1.34E-13 | -0.223968914 | 0.65  | 0.73  | 3.23E-09 | 1.2 |
| MRPL45    | 1.44E-13 | -0.192923153 | 0.149 | 0.229 | 3.48E-09 | 1.2 |
| ERGIC3    | 1.48E-13 | -0.239769366 | 0.294 | 0.384 | 3.56E-09 | 1.2 |
| DSC3      | 1.69E-13 | 0.231159672  | 0.06  | 0.026 | 4.08E-09 | 1.2 |
| TSPAN6    | 1.77E-13 | -0.186302696 | 0.087 | 0.152 | 4.26E-09 | 1.2 |
| NIPAL3    | 1.78E-13 | -0.147622518 | 0.039 | 0.09  | 4.28E-09 | 1.2 |
| PCBP2     | 1.79E-13 | -0.222987695 | 0.534 | 0.628 | 4.31E-09 | 1.2 |
| FAF1      | 1.82E-13 | -0.22405584  | 0.2   | 0.29  | 4.39E-09 | 1.2 |
| EEPD1     | 2.01E-13 | -0.173377476 | 0.023 | 0.066 | 4.84E-09 | 1.2 |
| KDM6A     | 2.03E-13 | -0.220063039 | 0.245 | 0.339 | 4.90E-09 | 1.2 |
| FCHSD2    | 2.05E-13 | -0.178779392 | 0.061 | 0.12  | 4.93E-09 | 1.2 |
| HIST1H4H  | 2.07E-13 | -0.162675016 | 0.033 | 0.081 | 5.00E-09 | 1.2 |
| LINC00536 | 2.10E-13 | -0.169598143 | 0.039 | 0.09  | 5.06E-09 | 1.2 |
| RCAN3     | 2.15E-13 | 0.582965356  | 0.238 | 0.173 | 5.18E-09 | 1.2 |
| DYNC2L11  | 2.18E-13 | -0.177358599 | 0.051 | 0.106 | 5.25E-09 | 1.2 |
| SPTLC2    | 2.25E-13 | 0.25646062   | 0.214 | 0.15  | 5.43E-09 | 1.2 |
| SLC7A11   | 2.35E-13 | 0.17851029   | 0.08  | 0.04  | 5.66E-09 | 1.2 |
| PAK1      | 2.39E-13 | -0.206073015 | 0.131 | 0.206 | 5.76E-09 | 1.2 |
| CASP4     | 2.42E-13 | -0.180242121 | 0.218 | 0.311 | 5.83E-09 | 1.2 |
| TUBA1A    | 2.42E-13 | 0.295507971  | 0.31  | 0.238 | 5.84E-09 | 1.2 |
| GLIPR2    | 2.48E-13 | -0.190505793 | 0.079 | 0.141 | 5.98E-09 | 1.2 |
| BCL7A     | 2.49E-13 | -0.144539542 | 0.016 | 0.054 | 6.00E-09 | 1.2 |
| RPRD2     | 2.62E-13 | -0.213648728 | 0.097 | 0.165 | 6.32E-09 | 1.2 |
| ZNHIT3    | 2.68E-13 | -0.179858223 | 0.148 | 0.225 | 6.45E-09 | 1.2 |
| FBXL17    | 2.84E-13 | -0.200112577 | 0.128 | 0.203 | 6.85E-09 | 1.2 |
| NAALADL2  | 2.87E-13 | -0.230675779 | 0.271 | 0.361 | 6.93E-09 | 1.2 |
| BCL10     | 3.16E-13 | 0.236825859  | 0.175 | 0.115 | 7.63E-09 | 1.2 |
| PTPRG     | 3.18E-13 | -0.237135083 | 0.166 | 0.247 | 7.66E-09 | 1.2 |
| F3        | 3.55E-13 | 0.278783155  | 0.098 | 0.054 | 8.55E-09 | 1.2 |
| PITPNC1   | 3.63E-13 | 0.450489976  | 0.265 | 0.2   | 8.76E-09 | 1.2 |
| BACH1     | 4.10E-13 | 0.32515399   | 0.36  | 0.291 | 9.90E-09 | 1.2 |
| HMGA1     | 4.62E-13 | 0.385950453  | 0.182 | 0.123 | 1.11E-08 | 1.2 |

|            |          |              |       |       |          |     |
|------------|----------|--------------|-------|-------|----------|-----|
| NBEAL1     | 4.92E-13 | -0.207438881 | 0.622 | 0.706 | 1.19E-08 | 1.2 |
| CLDN4      | 5.27E-13 | 0.38860055   | 0.269 | 0.201 | 1.27E-08 | 1.2 |
| CSF1       | 5.33E-13 | -0.225950153 | 0.048 | 0.101 | 1.28E-08 | 1.2 |
| ITGB4      | 5.33E-13 | -0.149751442 | 0.021 | 0.062 | 1.29E-08 | 1.2 |
| MTURN      | 5.36E-13 | 0.230460183  | 0.148 | 0.094 | 1.29E-08 | 1.2 |
| ABI1       | 6.16E-13 | 0.177314919  | 0.759 | 0.719 | 1.49E-08 | 1.2 |
| ICA1       | 6.18E-13 | -0.189401225 | 0.215 | 0.303 | 1.49E-08 | 1.2 |
| MBOAT2     | 6.30E-13 | -0.168827218 | 0.07  | 0.13  | 1.52E-08 | 1.2 |
| ILF2       | 6.41E-13 | 0.241328082  | 0.605 | 0.55  | 1.54E-08 | 1.2 |
| ACTR3      | 6.53E-13 | 0.253463734  | 0.359 | 0.287 | 1.58E-08 | 1.2 |
| SCOC       | 6.54E-13 | -0.205747176 | 0.199 | 0.282 | 1.58E-08 | 1.2 |
| AKAP12     | 6.58E-13 | 0.497761827  | 0.064 | 0.03  | 1.59E-08 | 1.2 |
| CMTM7      | 6.85E-13 | 0.288174075  | 0.284 | 0.215 | 1.65E-08 | 1.2 |
| SLC25A12   | 7.28E-13 | -0.186342216 | 0.054 | 0.108 | 1.75E-08 | 1.2 |
| MCFD2      | 7.39E-13 | 0.235114244  | 0.204 | 0.142 | 1.78E-08 | 1.2 |
| FAM189A2   | 7.56E-13 | -0.201807432 | 0.052 | 0.105 | 1.82E-08 | 1.2 |
| WNT9A      | 7.79E-13 | 0.139698064  | 0.052 | 0.022 | 1.88E-08 | 1.2 |
| IDH1       | 7.86E-13 | -0.145122974 | 0.034 | 0.081 | 1.90E-08 | 1.2 |
| MIR222HG   | 7.87E-13 | 0.260245469  | 0.139 | 0.086 | 1.90E-08 | 1.2 |
| RP11-437B  | 7.89E-13 | -0.225786338 | 0.317 | 0.416 | 1.90E-08 | 1.2 |
| ACTR3C     | 8.01E-13 | -0.127938072 | 0.019 | 0.058 | 1.93E-08 | 1.2 |
| RP11-817J1 | 8.43E-13 | -0.183460671 | 0.067 | 0.124 | 2.03E-08 | 1.2 |
| ELF1       | 9.36E-13 | 0.283330542  | 0.494 | 0.431 | 2.26E-08 | 1.2 |
| BAZ1A      | 9.97E-13 | 0.282818893  | 0.368 | 0.305 | 2.40E-08 | 1.2 |
| MT-CO1     | 1.05E-12 | -0.169170375 | 0.991 | 0.988 | 2.52E-08 | 1.2 |
| NEDD9      | 1.09E-12 | -0.340666675 | 0.211 | 0.287 | 2.63E-08 | 1.2 |
| BANF1      | 1.11E-12 | -0.169434639 | 0.151 | 0.229 | 2.69E-08 | 1.2 |
| TOMM7      | 1.12E-12 | -0.191396675 | 0.89  | 0.912 | 2.70E-08 | 1.2 |
| C14orf166  | 1.13E-12 | -0.170008928 | 0.181 | 0.263 | 2.73E-08 | 1.2 |
| PDCD10     | 1.15E-12 | 0.302056544  | 0.34  | 0.273 | 2.77E-08 | 1.2 |
| DLEU2      | 1.17E-12 | -0.18026536  | 0.133 | 0.205 | 2.83E-08 | 1.2 |
| MTIF3      | 1.20E-12 | -0.201779802 | 0.18  | 0.261 | 2.90E-08 | 1.2 |
| TMEM176A   | 1.24E-12 | -0.13204282  | 0.021 | 0.061 | 2.99E-08 | 1.2 |
| SLC5A1     | 1.24E-12 | 0.285192658  | 0.149 | 0.097 | 3.00E-08 | 1.2 |
| CHKA       | 1.33E-12 | -0.227240224 | 0.078 | 0.138 | 3.20E-08 | 1.2 |
| LARP7      | 1.35E-12 | -0.168087761 | 0.119 | 0.19  | 3.25E-08 | 1.2 |
| CLIC1      | 1.37E-12 | 0.3005115    | 0.619 | 0.585 | 3.29E-08 | 1.2 |
| TTC28      | 1.40E-12 | -0.203826921 | 0.053 | 0.106 | 3.38E-08 | 1.2 |
| THUMPD3    | 1.42E-12 | 0.323492767  | 0.355 | 0.291 | 3.42E-08 | 1.2 |
| PHF21A     | 1.42E-12 | -0.262138217 | 0.183 | 0.262 | 3.43E-08 | 1.2 |
| PTPN12     | 1.49E-12 | 0.262183335  | 0.473 | 0.413 | 3.60E-08 | 1.2 |
| TLE4       | 1.51E-12 | 0.250375331  | 0.462 | 0.389 | 3.64E-08 | 1.2 |
| LYPLAL1    | 1.61E-12 | -0.145361477 | 0.04  | 0.089 | 3.89E-08 | 1.2 |
| KTN1       | 1.66E-12 | 0.29776543   | 0.443 | 0.384 | 4.01E-08 | 1.2 |
| MARCKSL1   | 1.70E-12 | 0.26834446   | 0.133 | 0.083 | 4.10E-08 | 1.2 |
| SLC26A3    | 1.71E-12 | 0.256019443  | 0.791 | 0.753 | 4.12E-08 | 1.2 |
| CARF       | 1.74E-12 | -0.12153815  | 0.008 | 0.04  | 4.19E-08 | 1.2 |

|           |          |              |       |       |          |     |
|-----------|----------|--------------|-------|-------|----------|-----|
| CPNE3     | 1.74E-12 | -0.181500759 | 0.107 | 0.174 | 4.20E-08 | 1.2 |
| LMBRD1    | 1.79E-12 | -0.205293791 | 0.177 | 0.256 | 4.31E-08 | 1.2 |
| ABLIM3    | 1.83E-12 | 0.105354984  | 0.043 | 0.016 | 4.40E-08 | 1.2 |
| POGZ      | 1.95E-12 | -0.225604953 | 0.212 | 0.294 | 4.69E-08 | 1.2 |
| ATM       | 1.96E-12 | -0.150829613 | 0.037 | 0.084 | 4.73E-08 | 1.2 |
| HSP90AB1  | 2.01E-12 | 0.192309175  | 0.948 | 0.934 | 4.85E-08 | 1.2 |
| THSD4-AS1 | 2.03E-12 | -0.194244269 | 0.38  | 0.489 | 4.88E-08 | 1.2 |
| VCL       | 2.12E-12 | 0.256006255  | 0.38  | 0.307 | 5.11E-08 | 1.2 |
| MYH9      | 2.22E-12 | 0.298137528  | 0.536 | 0.475 | 5.34E-08 | 1.2 |
| UBR5      | 2.25E-12 | -0.243858296 | 0.336 | 0.429 | 5.42E-08 | 1.2 |
| LDLRAD3   | 2.25E-12 | -0.242835895 | 0.234 | 0.319 | 5.42E-08 | 1.2 |
| NDUFB1    | 2.27E-12 | -0.208202317 | 0.276 | 0.369 | 5.46E-08 | 1.2 |
| EGF       | 2.28E-12 | -0.154719256 | 0.041 | 0.09  | 5.49E-08 | 1.2 |
| TMEM14C   | 2.30E-12 | -0.125899393 | 0.051 | 0.103 | 5.55E-08 | 1.2 |
| BBIP1     | 2.31E-12 | -0.152849126 | 0.062 | 0.118 | 5.58E-08 | 1.2 |
| ZBTB43    | 2.48E-12 | 0.256302845  | 0.207 | 0.146 | 5.97E-08 | 1.2 |
| TIMM9     | 2.66E-12 | -0.208559455 | 0.163 | 0.237 | 6.41E-08 | 1.2 |
| NPC2      | 2.81E-12 | -0.215102441 | 0.385 | 0.482 | 6.77E-08 | 1.2 |
| CTD-2626G | 2.81E-12 | -0.124176847 | 0.014 | 0.05  | 6.77E-08 | 1.2 |
| RASGEF1C  | 2.84E-12 | 0.181259651  | 0.11  | 0.064 | 6.86E-08 | 1.2 |
| FRY       | 2.87E-12 | -0.125301633 | 0.013 | 0.048 | 6.93E-08 | 1.2 |
| TSLP      | 2.95E-12 | 0.198337604  | 0.112 | 0.066 | 7.12E-08 | 1.2 |
| APTX      | 3.04E-12 | -0.233819762 | 0.094 | 0.156 | 7.33E-08 | 1.2 |
| FAXDC2    | 3.12E-12 | -0.128506621 | 0.014 | 0.05  | 7.52E-08 | 1.2 |
| STAT3     | 3.16E-12 | -0.272893641 | 0.445 | 0.539 | 7.62E-08 | 1.2 |
| C4BPA     | 3.29E-12 | -0.174280002 | 0.017 | 0.053 | 7.92E-08 | 1.2 |
| FYN       | 3.29E-12 | 0.132437043  | 0.059 | 0.027 | 7.94E-08 | 1.2 |
| KLK7      | 3.44E-12 | 0.155993091  | 0.064 | 0.03  | 8.31E-08 | 1.2 |
| RPL23A    | 3.47E-12 | -0.25288206  | 0.684 | 0.734 | 8.37E-08 | 1.2 |
| ZNF83     | 3.51E-12 | 0.382068327  | 0.401 | 0.347 | 8.46E-08 | 1.2 |
| ARHGEF10  | 3.68E-12 | 0.324796688  | 0.416 | 0.355 | 8.87E-08 | 1.2 |
| C5orf46   | 3.79E-12 | 0.283401765  | 0.283 | 0.215 | 9.14E-08 | 1.2 |
| TCF7L2    | 3.93E-12 | -0.269495023 | 0.371 | 0.467 | 9.48E-08 | 1.2 |
| GSTO2     | 4.00E-12 | -0.176520494 | 0.073 | 0.13  | 9.65E-08 | 1.2 |
| TCEAL4    | 4.26E-12 | -0.197897718 | 0.168 | 0.244 | 1.03E-07 | 1.2 |
| TRIM38    | 4.28E-12 | -0.178339284 | 0.063 | 0.117 | 1.03E-07 | 1.2 |
| KIZ-AS1   | 4.29E-12 | 0.174367251  | 0.894 | 0.89  | 1.03E-07 | 1.2 |
| ALDH7A1   | 4.35E-12 | -0.192246791 | 0.058 | 0.111 | 1.05E-07 | 1.2 |
| RNF181    | 4.35E-12 | 0.295605792  | 0.436 | 0.371 | 1.05E-07 | 1.2 |
| STK10     | 4.58E-12 | 0.184869179  | 0.098 | 0.056 | 1.11E-07 | 1.2 |
| NSD1      | 4.70E-12 | -0.19190913  | 0.097 | 0.161 | 1.13E-07 | 1.2 |
| TBC1D22B  | 4.78E-12 | 0.241823665  | 0.235 | 0.171 | 1.15E-07 | 1.2 |
| DLEU1     | 4.89E-12 | -0.137798964 | 0.106 | 0.174 | 1.18E-07 | 1.2 |
| SYCP3     | 4.94E-12 | -0.123305672 | 0.008 | 0.038 | 1.19E-07 | 1.2 |
| EIF4A2    | 5.06E-12 | 0.214512771  | 0.821 | 0.811 | 1.22E-07 | 1.2 |
| DPYSL2    | 5.57E-12 | -0.1774511   | 0.08  | 0.139 | 1.34E-07 | 1.2 |
| RNF144B   | 5.63E-12 | -0.187408847 | 0.279 | 0.369 | 1.36E-07 | 1.2 |

|           |          |              |       |       |          |     |
|-----------|----------|--------------|-------|-------|----------|-----|
| ARPC2     | 6.00E-12 | 0.253546008  | 0.223 | 0.163 | 1.45E-07 | 1.2 |
| RPA3      | 6.37E-12 | -0.162993931 | 0.076 | 0.134 | 1.54E-07 | 1.2 |
| RP11-536O | 6.62E-12 | -0.124707524 | 0.073 | 0.132 | 1.60E-07 | 1.2 |
| ISG20     | 6.66E-12 | 0.247384941  | 0.077 | 0.04  | 1.61E-07 | 1.2 |
| PGM1      | 6.77E-12 | -0.204780647 | 0.076 | 0.134 | 1.63E-07 | 1.2 |
| ANKRD36   | 6.84E-12 | 0.279202079  | 0.188 | 0.131 | 1.65E-07 | 1.2 |
| FAM129B   | 6.85E-12 | 0.279617946  | 0.15  | 0.098 | 1.65E-07 | 1.2 |
| PNPLA3    | 7.11E-12 | -0.113173808 | 0.012 | 0.045 | 1.71E-07 | 1.2 |
| RP11-115D | 7.15E-12 | -0.143068262 | 0.008 | 0.038 | 1.72E-07 | 1.2 |
| ACAT2     | 7.24E-12 | -0.253503851 | 0.229 | 0.308 | 1.74E-07 | 1.2 |
| MIB1      | 7.40E-12 | 0.252856444  | 0.357 | 0.289 | 1.78E-07 | 1.2 |
| ACSL3     | 7.44E-12 | -0.292703278 | 0.199 | 0.279 | 1.79E-07 | 1.2 |
| IRS2      | 7.49E-12 | 0.244872548  | 0.414 | 0.346 | 1.81E-07 | 1.2 |
| PKD2      | 7.49E-12 | -0.158798695 | 0.047 | 0.096 | 1.81E-07 | 1.2 |
| NHSL2     | 7.68E-12 | 0.285534909  | 0.379 | 0.319 | 1.85E-07 | 1.2 |
| SREK1     | 8.23E-12 | -0.185533773 | 0.103 | 0.167 | 1.98E-07 | 1.2 |
| CCDC66    | 8.24E-12 | -0.145221036 | 0.102 | 0.166 | 1.99E-07 | 1.2 |
| RP11-475O | 8.45E-12 | -0.174366659 | 0.022 | 0.061 | 2.04E-07 | 1.2 |
| CCSER1    | 8.65E-12 | -0.246762303 | 0.459 | 0.546 | 2.08E-07 | 1.2 |
| SLC25A33  | 8.97E-12 | -0.245479926 | 0.088 | 0.148 | 2.16E-07 | 1.2 |
| CEBPD     | 9.01E-12 | -0.21883969  | 0.163 | 0.238 | 2.17E-07 | 1.2 |
| HMG20A    | 9.20E-12 | -0.124412862 | 0.026 | 0.067 | 2.22E-07 | 1.2 |
| THYN1     | 9.31E-12 | -0.109797526 | 0.016 | 0.051 | 2.25E-07 | 1.2 |
| PCM1      | 9.85E-12 | -0.174404628 | 0.135 | 0.206 | 2.38E-07 | 1.2 |
| C8orf4    | 1.08E-11 | -0.29249722  | 0.108 | 0.17  | 2.60E-07 | 1.2 |
| LRIG3     | 1.09E-11 | -0.132932824 | 0.025 | 0.065 | 2.62E-07 | 1.2 |
| WDFY3     | 1.14E-11 | -0.2023221   | 0.188 | 0.264 | 2.76E-07 | 1.2 |
| AKAP13    | 1.17E-11 | 0.258556662  | 0.558 | 0.508 | 2.82E-07 | 1.2 |
| MRPS18B   | 1.21E-11 | -0.154099014 | 0.103 | 0.167 | 2.91E-07 | 1.2 |
| AC058791. | 1.22E-11 | 0.258135542  | 0.257 | 0.195 | 2.95E-07 | 1.2 |
| ATP5C1    | 1.23E-11 | -0.177815732 | 0.282 | 0.374 | 2.97E-07 | 1.2 |
| SDCCAG8   | 1.27E-11 | -0.206299166 | 0.13  | 0.199 | 3.07E-07 | 1.2 |
| CHORDC1   | 1.29E-11 | 0.254734194  | 0.134 | 0.086 | 3.11E-07 | 1.2 |
| TOP1      | 1.30E-11 | -0.22941465  | 0.274 | 0.362 | 3.14E-07 | 1.2 |
| RP11-7K24 | 1.30E-11 | 0.108453287  | 0.038 | 0.014 | 3.14E-07 | 1.2 |
| MTMR3     | 1.31E-11 | -0.194145311 | 0.115 | 0.181 | 3.16E-07 | 1.2 |
| PIWIL4    | 1.35E-11 | -0.156853049 | 0.03  | 0.072 | 3.24E-07 | 1.2 |
| COMMD6    | 1.36E-11 | -0.18958306  | 0.342 | 0.435 | 3.28E-07 | 1.2 |
| SLC35F3   | 1.44E-11 | 0.194384294  | 0.082 | 0.044 | 3.48E-07 | 1.2 |
| MORF4L1   | 1.46E-11 | 0.219634899  | 0.71  | 0.689 | 3.52E-07 | 1.2 |
| TMEM176F  | 1.48E-11 | -0.126461317 | 0.02  | 0.057 | 3.58E-07 | 1.2 |
| MCC       | 1.53E-11 | -0.166252096 | 0.071 | 0.126 | 3.70E-07 | 1.2 |
| TLR5      | 1.56E-11 | -0.116681757 | 0.021 | 0.059 | 3.76E-07 | 1.2 |
| ELOVL6    | 1.60E-11 | -0.193143431 | 0.046 | 0.093 | 3.85E-07 | 1.2 |
| UST       | 1.60E-11 | -0.303861779 | 0.189 | 0.264 | 3.87E-07 | 1.2 |
| CNNM2     | 1.63E-11 | -0.131395954 | 0.024 | 0.063 | 3.93E-07 | 1.2 |
| PBRM1     | 1.68E-11 | -0.1878962   | 0.141 | 0.213 | 4.06E-07 | 1.2 |

|           |          |              |       |       |          |     |
|-----------|----------|--------------|-------|-------|----------|-----|
| SH3BGRL   | 1.74E-11 | -0.184634806 | 0.181 | 0.258 | 4.20E-07 | 1.2 |
| PAPD4     | 1.80E-11 | -0.204384706 | 0.229 | 0.312 | 4.34E-07 | 1.2 |
| HIST1H2BC | 1.83E-11 | -0.152851123 | 0.065 | 0.119 | 4.40E-07 | 1.2 |
| SNRPG     | 1.84E-11 | 0.298861077  | 0.578 | 0.535 | 4.43E-07 | 1.2 |
| ZRANB1    | 1.89E-11 | 0.227544808  | 0.203 | 0.144 | 4.55E-07 | 1.2 |
| PLA2G4C   | 1.99E-11 | -0.118749129 | 0.027 | 0.066 | 4.80E-07 | 1.2 |
| MT-ATP6   | 2.02E-11 | -0.142298142 | 0.991 | 0.986 | 4.88E-07 | 1.2 |
| FUT9      | 2.03E-11 | -0.118644069 | 0.009 | 0.039 | 4.89E-07 | 1.2 |
| MOB3B     | 2.06E-11 | -0.191423226 | 0.182 | 0.262 | 4.96E-07 | 1.2 |
| HSDL2     | 2.06E-11 | -0.155704577 | 0.065 | 0.118 | 4.97E-07 | 1.2 |
| BNIP3     | 2.10E-11 | 0.212029902  | 0.156 | 0.103 | 5.07E-07 | 1.2 |
| EHD2      | 2.12E-11 | 0.128645778  | 0.075 | 0.039 | 5.12E-07 | 1.2 |
| PER2      | 2.21E-11 | -0.163604793 | 0.06  | 0.112 | 5.33E-07 | 1.2 |
| MTF2      | 2.23E-11 | -0.203892696 | 0.158 | 0.23  | 5.38E-07 | 1.2 |
| SERAC1    | 2.29E-11 | -0.203631791 | 0.044 | 0.089 | 5.52E-07 | 1.2 |
| UFC1      | 2.36E-11 | -0.195884131 | 0.441 | 0.53  | 5.70E-07 | 1.2 |
| FAM49B    | 2.39E-11 | 0.23008128   | 0.287 | 0.224 | 5.76E-07 | 1.2 |
| MTHFD1L   | 2.45E-11 | 0.353817108  | 0.329 | 0.274 | 5.91E-07 | 1.2 |
| CTPS2     | 2.81E-11 | -0.139487697 | 0.035 | 0.077 | 6.77E-07 | 1.2 |
| ANTXR1    | 2.86E-11 | -0.11384583  | 0.026 | 0.065 | 6.89E-07 | 1.2 |
| CAV2      | 2.97E-11 | 0.168331819  | 0.098 | 0.057 | 7.16E-07 | 1.2 |
| LINC01515 | 3.04E-11 | -0.126789591 | 0.012 | 0.044 | 7.34E-07 | 1.2 |
| C21orf91  | 3.08E-11 | -0.134935924 | 0.033 | 0.075 | 7.44E-07 | 1.2 |
| CORO1C    | 3.10E-11 | 0.183048586  | 0.291 | 0.221 | 7.47E-07 | 1.2 |
| EGOT      | 3.13E-11 | -0.152281729 | 0.039 | 0.082 | 7.56E-07 | 1.2 |
| PDLIM3    | 3.14E-11 | -0.16662426  | 0.031 | 0.071 | 7.57E-07 | 1.2 |
| C1R       | 3.32E-11 | -0.175437462 | 0.041 | 0.086 | 8.00E-07 | 1.2 |
| MAP3K2    | 3.32E-11 | -0.204310867 | 0.132 | 0.197 | 8.01E-07 | 1.2 |
| DDAH1     | 3.35E-11 | 0.27016457   | 0.133 | 0.086 | 8.07E-07 | 1.2 |
| TJP2      | 3.36E-11 | 0.324052695  | 0.456 | 0.405 | 8.09E-07 | 1.2 |
| HIST1H2BN | 3.39E-11 | -0.101784934 | 0.013 | 0.045 | 8.17E-07 | 1.2 |
| FNBP1     | 3.40E-11 | -0.28482127  | 0.416 | 0.507 | 8.19E-07 | 1.2 |
| RAB29     | 3.43E-11 | -0.123218875 | 0.045 | 0.092 | 8.27E-07 | 1.2 |
| LRP6      | 3.45E-11 | -0.283655989 | 0.232 | 0.308 | 8.33E-07 | 1.2 |
| IGBP1     | 3.64E-11 | -0.180469428 | 0.382 | 0.476 | 8.77E-07 | 1.2 |
| RPL12     | 3.72E-11 | -0.174011312 | 0.326 | 0.413 | 8.96E-07 | 1.2 |
| NUDT2     | 3.81E-11 | -0.161811705 | 0.097 | 0.157 | 9.20E-07 | 1.2 |
| MAP2K5    | 4.01E-11 | -0.140182076 | 0.082 | 0.14  | 9.66E-07 | 1.2 |
| TMEM27    | 4.17E-11 | 0.123006984  | 0.073 | 0.038 | 1.00E-06 | 1.2 |
| LIFR      | 4.17E-11 | -0.218530392 | 0.071 | 0.124 | 1.01E-06 | 1.2 |
| EFNA1     | 4.19E-11 | -0.134251147 | 0.069 | 0.123 | 1.01E-06 | 1.2 |
| PIK3IP1   | 4.19E-11 | -0.118445437 | 0.034 | 0.076 | 1.01E-06 | 1.2 |
| USP13     | 4.20E-11 | -0.149559468 | 0.053 | 0.102 | 1.01E-06 | 1.2 |
| TTY14     | 4.21E-11 | 0.356113857  | 0.351 | 0.289 | 1.02E-06 | 1.2 |
| TUBB4B    | 4.24E-11 | 0.21472241   | 0.084 | 0.047 | 1.02E-06 | 1.2 |
| DZIP3     | 4.25E-11 | -0.117792541 | 0.016 | 0.05  | 1.02E-06 | 1.2 |
| TNFRSF12A | 4.42E-11 | 0.110574102  | 0.046 | 0.02  | 1.07E-06 | 1.2 |

|           |          |              |       |       |          |     |
|-----------|----------|--------------|-------|-------|----------|-----|
| LYST      | 4.75E-11 | 0.26817596   | 0.211 | 0.155 | 1.15E-06 | 1.2 |
| HIST1H2BJ | 4.87E-11 | -0.18098524  | 0.054 | 0.103 | 1.17E-06 | 1.2 |
| GRIP1     | 4.96E-11 | -0.216588832 | 0.146 | 0.215 | 1.20E-06 | 1.2 |
| SEC24A    | 5.05E-11 | 0.199258303  | 0.268 | 0.204 | 1.22E-06 | 1.2 |
| PCNXL2    | 5.23E-11 | 0.300378956  | 0.813 | 0.813 | 1.26E-06 | 1.2 |
| DNAJA1    | 5.33E-11 | 0.244257422  | 0.297 | 0.233 | 1.28E-06 | 1.2 |
| ENO2      | 5.37E-11 | 0.135047697  | 0.093 | 0.053 | 1.30E-06 | 1.2 |
| COPS4     | 5.42E-11 | -0.165098494 | 0.086 | 0.144 | 1.31E-06 | 1.2 |
| VPS13C    | 5.51E-11 | -0.17751761  | 0.165 | 0.235 | 1.33E-06 | 1.2 |
| MAT2A     | 5.70E-11 | 0.186551787  | 0.092 | 0.054 | 1.37E-06 | 1.2 |
| RCOR3     | 5.81E-11 | -0.139679212 | 0.057 | 0.107 | 1.40E-06 | 1.2 |
| NHSL1     | 5.89E-11 | 0.328105061  | 0.25  | 0.189 | 1.42E-06 | 1.2 |
| PEX2      | 5.95E-11 | -0.1177699   | 0.057 | 0.107 | 1.44E-06 | 1.2 |
| GPRIN3    | 6.09E-11 | -0.120938583 | 0.009 | 0.038 | 1.47E-06 | 1.2 |
| DDX1      | 6.11E-11 | -0.14981639  | 0.082 | 0.138 | 1.47E-06 | 1.2 |
| SPPL3     | 6.17E-11 | -0.187759031 | 0.191 | 0.268 | 1.49E-06 | 1.2 |
| LIF       | 6.31E-11 | 0.185570675  | 0.056 | 0.027 | 1.52E-06 | 1.2 |
| SPATA5    | 6.54E-11 | 0.279251463  | 0.176 | 0.123 | 1.58E-06 | 1.2 |
| CALU      | 6.62E-11 | 0.289188548  | 0.337 | 0.281 | 1.60E-06 | 1.2 |
| VPS25     | 6.86E-11 | -0.150424777 | 0.084 | 0.141 | 1.65E-06 | 1.2 |
| BNIP3L    | 6.95E-11 | 0.236098606  | 0.359 | 0.293 | 1.68E-06 | 1.2 |
| LINC00152 | 7.08E-11 | 0.204638313  | 0.396 | 0.329 | 1.71E-06 | 1.2 |
| SNX9      | 7.26E-11 | 0.289388166  | 0.491 | 0.439 | 1.75E-06 | 1.2 |
| SLX4IP    | 7.26E-11 | -0.11973866  | 0.015 | 0.048 | 1.75E-06 | 1.2 |
| ELMSAN1   | 7.32E-11 | -0.162514411 | 0.046 | 0.091 | 1.77E-06 | 1.2 |
| ZDHHC20   | 7.55E-11 | -0.17145241  | 0.102 | 0.163 | 1.82E-06 | 1.2 |
| MYOF      | 7.65E-11 | 0.287165517  | 0.552 | 0.509 | 1.84E-06 | 1.2 |
| PDE4B     | 7.70E-11 | -0.210027187 | 0.864 | 0.926 | 1.86E-06 | 1.2 |
| AC073283. | 7.73E-11 | -0.12072255  | 0.072 | 0.126 | 1.86E-06 | 1.2 |
| QRSL1     | 7.81E-11 | -0.134064908 | 0.038 | 0.081 | 1.88E-06 | 1.2 |
| MSH3      | 7.89E-11 | -0.194171863 | 0.065 | 0.116 | 1.90E-06 | 1.2 |
| RASGEF1A  | 7.94E-11 | -0.132914049 | 0.015 | 0.047 | 1.92E-06 | 1.2 |
| PPIL3     | 8.06E-11 | -0.120420926 | 0.067 | 0.12  | 1.94E-06 | 1.2 |
| UBE2N     | 8.56E-11 | 0.267455086  | 0.263 | 0.206 | 2.06E-06 | 1.2 |
| MACROD2   | 8.68E-11 | -0.243847647 | 0.205 | 0.279 | 2.09E-06 | 1.2 |
| COX6B1    | 8.98E-11 | -0.179673767 | 0.684 | 0.753 | 2.17E-06 | 1.2 |
| TSC22D1   | 9.14E-11 | -0.260636329 | 0.2   | 0.272 | 2.20E-06 | 1.2 |
| PPP1R21   | 9.29E-11 | 0.24128304   | 0.127 | 0.082 | 2.24E-06 | 1.2 |
| KLK10     | 9.76E-11 | 0.199203574  | 0.089 | 0.051 | 2.35E-06 | 1.2 |
| DHRS3     | 9.95E-11 | -0.160166787 | 0.054 | 0.102 | 2.40E-06 | 1.2 |
| RAPGEF5   | 1.00E-10 | -0.207251656 | 0.413 | 0.501 | 2.42E-06 | 1.2 |
| PARG      | 1.08E-10 | -0.159323797 | 0.055 | 0.103 | 2.62E-06 | 1.2 |
| TMED10    | 1.25E-10 | -0.199831153 | 0.252 | 0.333 | 3.00E-06 | 1.2 |
| NDUFB3    | 1.26E-10 | -0.165982784 | 0.162 | 0.233 | 3.05E-06 | 1.2 |
| RP11-131L | 1.28E-10 | 0.279843172  | 0.108 | 0.067 | 3.08E-06 | 1.2 |
| LINC01482 | 1.29E-10 | -0.127399872 | 0.008 | 0.036 | 3.11E-06 | 1.2 |
| DAAM1     | 1.31E-10 | 0.185861397  | 0.561 | 0.502 | 3.16E-06 | 1.2 |



|           |          |              |       |       |          |     |
|-----------|----------|--------------|-------|-------|----------|-----|
| ZNF226    | 1.31E-10 | -0.11954884  | 0.044 | 0.088 | 3.17E-06 | 1.2 |
| SH3PXD2A  | 1.32E-10 | 0.28228569   | 0.19  | 0.136 | 3.18E-06 | 1.2 |
| TIMM10    | 1.33E-10 | -0.165907734 | 0.194 | 0.269 | 3.20E-06 | 1.2 |
| ALDH1A2   | 1.34E-10 | -0.12638715  | 0.015 | 0.047 | 3.23E-06 | 1.2 |
| YWHAB     | 1.35E-10 | 0.252832742  | 0.326 | 0.267 | 3.26E-06 | 1.2 |
| RPS13     | 1.36E-10 | -0.280338022 | 0.84  | 0.851 | 3.28E-06 | 1.2 |
| NFATC2    | 1.42E-10 | 0.196074615  | 0.191 | 0.133 | 3.42E-06 | 1.2 |
| PARD3     | 1.42E-10 | 0.225931933  | 0.672 | 0.638 | 3.42E-06 | 1.2 |
| TSC22D2   | 1.42E-10 | -0.457546049 | 0.275 | 0.337 | 3.43E-06 | 1.2 |
| MAP2K3    | 1.46E-10 | 0.168260733  | 0.094 | 0.055 | 3.52E-06 | 1.2 |
| PDSS2     | 1.46E-10 | -0.187680715 | 0.092 | 0.149 | 3.53E-06 | 1.2 |
| CHCHD3    | 1.47E-10 | -0.159604027 | 0.857 | 0.891 | 3.53E-06 | 1.2 |
| OARD1     | 1.52E-10 | -0.128819942 | 0.061 | 0.111 | 3.65E-06 | 1.2 |
| PAWR      | 1.57E-10 | 0.197525014  | 0.525 | 0.468 | 3.79E-06 | 1.2 |
| MTHFD2L   | 1.58E-10 | 0.438146664  | 0.646 | 0.607 | 3.81E-06 | 1.2 |
| FDFT1     | 1.60E-10 | -0.23898055  | 0.279 | 0.356 | 3.85E-06 | 1.2 |
| TGFBR3    | 1.66E-10 | -0.248120925 | 0.14  | 0.207 | 4.00E-06 | 1.2 |
| FAM210B   | 1.66E-10 | -0.114929599 | 0.03  | 0.069 | 4.01E-06 | 1.2 |
| TIMM17A   | 1.70E-10 | 0.264877092  | 0.265 | 0.209 | 4.09E-06 | 1.2 |
| DIMT1     | 1.72E-10 | -0.119574266 | 0.035 | 0.076 | 4.15E-06 | 1.2 |
| FBLIM1    | 1.74E-10 | 0.210087966  | 0.188 | 0.134 | 4.21E-06 | 1.2 |
| CCDC122   | 1.75E-10 | -0.108695492 | 0.021 | 0.056 | 4.21E-06 | 1.2 |
| CTD-2020K | 1.76E-10 | 0.110109763  | 0.037 | 0.014 | 4.23E-06 | 1.2 |
| MTRNR2L1  | 1.78E-10 | 0.303345405  | 0.328 | 0.268 | 4.30E-06 | 1.2 |
| MYO1B     | 1.81E-10 | 0.285226315  | 0.379 | 0.319 | 4.35E-06 | 1.2 |
| SKAP2     | 1.85E-10 | -0.171945172 | 0.258 | 0.343 | 4.46E-06 | 1.2 |
| FAM151B   | 1.88E-10 | -0.123430449 | 0.021 | 0.056 | 4.53E-06 | 1.2 |
| NDUFA12   | 1.89E-10 | -0.162372301 | 0.176 | 0.249 | 4.55E-06 | 1.2 |
| TMLHE     | 1.93E-10 | -0.131989882 | 0.029 | 0.067 | 4.66E-06 | 1.2 |
| CX3CL1    | 2.02E-10 | -0.261892305 | 0.209 | 0.282 | 4.87E-06 | 1.2 |
| RB1CC1    | 2.07E-10 | 0.252850975  | 0.445 | 0.393 | 4.99E-06 | 1.2 |
| UVRAG     | 2.10E-10 | -0.240351129 | 0.352 | 0.435 | 5.06E-06 | 1.2 |
| OTUD6B-A' | 2.14E-10 | -0.136532821 | 0.144 | 0.214 | 5.16E-06 | 1.2 |
| AUTS2     | 2.15E-10 | -0.218304889 | 0.495 | 0.582 | 5.18E-06 | 1.2 |
| AP006222. | 2.16E-10 | 0.129340396  | 0.063 | 0.032 | 5.22E-06 | 1.2 |
| COTL1     | 2.20E-10 | 0.149251969  | 0.066 | 0.035 | 5.30E-06 | 1.2 |
| PDZD11    | 2.28E-10 | -0.123293999 | 0.057 | 0.104 | 5.51E-06 | 1.2 |
| CYP27A1   | 2.30E-10 | -0.141126884 | 0.048 | 0.093 | 5.55E-06 | 1.2 |
| MRRF      | 2.31E-10 | -0.15500331  | 0.121 | 0.184 | 5.56E-06 | 1.2 |
| SSR3      | 2.53E-10 | 0.223169296  | 0.613 | 0.586 | 6.10E-06 | 1.2 |
| RP11-371F | 2.58E-10 | 0.157601449  | 0.056 | 0.028 | 6.21E-06 | 1.2 |
| BTAFF1    | 2.58E-10 | -0.265147772 | 0.195 | 0.262 | 6.23E-06 | 1.2 |
| KLC1      | 2.69E-10 | 0.153311821  | 0.069 | 0.037 | 6.49E-06 | 1.2 |
| RAD51C    | 2.71E-10 | -0.10224927  | 0.024 | 0.059 | 6.53E-06 | 1.2 |
| JARID2    | 2.71E-10 | -0.256925498 | 0.199 | 0.271 | 6.54E-06 | 1.2 |
| PTPRM     | 2.73E-10 | -0.357167944 | 0.127 | 0.187 | 6.59E-06 | 1.2 |
| MICAL2    | 2.75E-10 | -0.176855617 | 0.034 | 0.073 | 6.62E-06 | 1.2 |

|           |          |              |       |       |          |     |
|-----------|----------|--------------|-------|-------|----------|-----|
| TFDP2     | 2.78E-10 | -0.175729236 | 0.173 | 0.243 | 6.72E-06 | 1.2 |
| CNIH4     | 2.83E-10 | 0.257162544  | 0.422 | 0.37  | 6.83E-06 | 1.2 |
| PREPL     | 2.87E-10 | -0.195195883 | 0.088 | 0.142 | 6.92E-06 | 1.2 |
| CDC27     | 2.99E-10 | -0.227289313 | 0.187 | 0.256 | 7.20E-06 | 1.2 |
| EPB41L3   | 3.11E-10 | 0.143744802  | 0.039 | 0.016 | 7.50E-06 | 1.2 |
| FRMD4A    | 3.19E-10 | -0.339421703 | 0.419 | 0.494 | 7.68E-06 | 1.2 |
| SLTM      | 3.23E-10 | -0.175237307 | 0.203 | 0.276 | 7.80E-06 | 1.2 |
| CD163L1   | 3.36E-10 | -0.125072616 | 0.034 | 0.073 | 8.10E-06 | 1.2 |
| B4GALNT3  | 3.36E-10 | 0.128472368  | 0.077 | 0.042 | 8.10E-06 | 1.2 |
| DUSP5     | 3.38E-10 | 0.156613431  | 0.1   | 0.061 | 8.15E-06 | 1.2 |
| SRI       | 3.39E-10 | 0.191856466  | 0.088 | 0.051 | 8.17E-06 | 1.2 |
| HIVEP3    | 3.40E-10 | -0.227902944 | 0.254 | 0.337 | 8.20E-06 | 1.2 |
| SCGB1D2   | 3.42E-10 | 0.37206892   | 0.13  | 0.084 | 8.25E-06 | 1.2 |
| DIAPH2    | 3.44E-10 | -0.184283454 | 0.216 | 0.291 | 8.30E-06 | 1.2 |
| ADH5      | 3.44E-10 | -0.141991304 | 0.081 | 0.134 | 8.31E-06 | 1.2 |
| LSAMP     | 3.53E-10 | 0.259762332  | 0.297 | 0.236 | 8.52E-06 | 1.2 |
| MSI2      | 3.55E-10 | -0.168399149 | 0.146 | 0.212 | 8.55E-06 | 1.2 |
| CETN3     | 3.55E-10 | -0.106091975 | 0.021 | 0.054 | 8.56E-06 | 1.2 |
| KCTD9     | 3.68E-10 | 0.240885673  | 0.35  | 0.287 | 8.87E-06 | 1.2 |
| RAD50     | 3.81E-10 | -0.13895993  | 0.062 | 0.111 | 9.19E-06 | 1.2 |
| ARHGDIB   | 3.84E-10 | -0.195023729 | 0.131 | 0.193 | 9.25E-06 | 1.2 |
| PTPN4     | 3.91E-10 | -0.136134979 | 0.055 | 0.102 | 9.43E-06 | 1.2 |
| LINC01138 | 4.02E-10 | -0.19639104  | 0.177 | 0.246 | 9.69E-06 | 1.2 |
| ST14      | 4.03E-10 | 0.226018536  | 0.223 | 0.167 | 9.71E-06 | 1.2 |
| ANKRD26   | 4.04E-10 | -0.126152139 | 0.042 | 0.084 | 9.74E-06 | 1.2 |
| TARS      | 4.12E-10 | 0.249887403  | 0.239 | 0.183 | 9.93E-06 | 1.2 |
| RUBCN     | 4.13E-10 | 0.148665784  | 0.098 | 0.058 | 9.96E-06 | 1.2 |
| ARPP19    | 4.23E-10 | 0.203206753  | 0.382 | 0.32  | 1.02E-05 | 1.2 |
| ATG14     | 4.34E-10 | -0.181879598 | 0.063 | 0.11  | 1.05E-05 | 1.2 |
| CCT3      | 4.45E-10 | -0.137447404 | 0.368 | 0.461 | 1.07E-05 | 1.2 |
| MFSD11    | 4.49E-10 | -0.134478275 | 0.04  | 0.081 | 1.08E-05 | 1.2 |
| MT-ND4    | 4.75E-10 | -0.104649568 | 0.994 | 0.989 | 1.15E-05 | 1.2 |
| KCNK1     | 4.79E-10 | 0.245526587  | 0.215 | 0.161 | 1.15E-05 | 1.2 |
| MLF1      | 4.80E-10 | -0.176765258 | 0.176 | 0.244 | 1.16E-05 | 1.2 |
| DISC1     | 4.83E-10 | -0.15859098  | 0.064 | 0.113 | 1.16E-05 | 1.2 |
| TMEM126F  | 4.96E-10 | -0.136035421 | 0.08  | 0.133 | 1.20E-05 | 1.2 |
| S100A2    | 5.15E-10 | 0.577460346  | 0.136 | 0.091 | 1.24E-05 | 1.2 |
| ABCC4     | 5.45E-10 | -0.133338361 | 0.013 | 0.043 | 1.31E-05 | 1.2 |
| NPC1      | 5.55E-10 | 0.240496309  | 0.372 | 0.31  | 1.34E-05 | 1.2 |
| RPL14     | 5.57E-10 | -0.147934215 | 0.989 | 0.979 | 1.34E-05 | 1.2 |
| ODAM      | 5.59E-10 | -0.208358369 | 0.006 | 0.031 | 1.35E-05 | 1.2 |
| ZDHHC14   | 5.61E-10 | 0.23473099   | 0.138 | 0.093 | 1.35E-05 | 1.2 |
| TFCP2     | 5.69E-10 | -0.163572901 | 0.093 | 0.149 | 1.37E-05 | 1.2 |
| PSMC5     | 5.73E-10 | -0.124194225 | 0.063 | 0.112 | 1.38E-05 | 1.2 |
| SEC24D    | 5.89E-10 | -0.268686136 | 0.242 | 0.315 | 1.42E-05 | 1.2 |
| ATP5G1    | 6.02E-10 | -0.165200189 | 0.156 | 0.221 | 1.45E-05 | 1.2 |
| ADAMTS9-  | 6.07E-10 | 0.124927005  | 0.045 | 0.02  | 1.46E-05 | 1.2 |

|           |          |              |       |       |          |     |
|-----------|----------|--------------|-------|-------|----------|-----|
| SPIRE1    | 6.13E-10 | -0.201961145 | 0.334 | 0.418 | 1.48E-05 | 1.2 |
| PCLO      | 6.22E-10 | -0.142037102 | 0.02  | 0.052 | 1.50E-05 | 1.2 |
| SLC19A2   | 6.56E-10 | -0.145953225 | 0.055 | 0.1   | 1.58E-05 | 1.2 |
| GABRG3    | 6.62E-10 | -0.134964841 | 0.016 | 0.046 | 1.60E-05 | 1.2 |
| NOL3      | 6.72E-10 | -0.117268039 | 0.024 | 0.058 | 1.62E-05 | 1.2 |
| ITGB8     | 6.72E-10 | 0.221399236  | 0.748 | 0.733 | 1.62E-05 | 1.2 |
| HPCAL1    | 7.21E-10 | 0.249659523  | 0.145 | 0.099 | 1.74E-05 | 1.2 |
| MBD5      | 7.27E-10 | -0.193651229 | 0.209 | 0.283 | 1.75E-05 | 1.2 |
| CTNNA1    | 7.31E-10 | 0.249755989  | 0.528 | 0.49  | 1.76E-05 | 1.2 |
| SNCAIP    | 7.53E-10 | -0.122374666 | 0.009 | 0.035 | 1.82E-05 | 1.2 |
| SOX5      | 8.02E-10 | -0.156573653 | 0.017 | 0.047 | 1.93E-05 | 1.2 |
| C1QTNF1   | 8.04E-10 | -0.119128511 | 0.02  | 0.053 | 1.94E-05 | 1.2 |
| FZD7      | 8.14E-10 | -0.124236114 | 0.046 | 0.088 | 1.96E-05 | 1.2 |
| EVL       | 8.27E-10 | -0.15699231  | 0.032 | 0.07  | 1.99E-05 | 1.2 |
| TMEM126/  | 8.31E-10 | -0.126566119 | 0.083 | 0.136 | 2.00E-05 | 1.2 |
| BACH2     | 8.40E-10 | 0.159996572  | 0.461 | 0.399 | 2.03E-05 | 1.2 |
| BMP2K     | 9.01E-10 | 0.160610077  | 0.09  | 0.053 | 2.17E-05 | 1.2 |
| B4GALT5   | 9.21E-10 | 0.256894057  | 0.379 | 0.321 | 2.22E-05 | 1.2 |
| EML4      | 9.36E-10 | -0.177019531 | 0.208 | 0.281 | 2.26E-05 | 1.2 |
| POLR2F    | 9.40E-10 | -0.14197671  | 0.039 | 0.079 | 2.27E-05 | 1.2 |
| RNASE1    | 9.55E-10 | -0.119728578 | 0.017 | 0.047 | 2.30E-05 | 1.2 |
| CTD-3252C | 9.80E-10 | 0.175060011  | 0.123 | 0.08  | 2.36E-05 | 1.2 |
| BAMBI     | 1.00E-09 | -0.132807525 | 0.046 | 0.088 | 2.41E-05 | 1.2 |
| EFNA5     | 1.02E-09 | -0.237366483 | 0.437 | 0.514 | 2.46E-05 | 1.2 |
| CLIC4     | 1.02E-09 | 0.21322012   | 0.685 | 0.647 | 2.47E-05 | 1.2 |
| DDX5      | 1.02E-09 | 0.18563672   | 0.544 | 0.495 | 2.47E-05 | 1.2 |
| MBNL1     | 1.08E-09 | -0.205520051 | 0.358 | 0.444 | 2.59E-05 | 1.2 |
| CREB5     | 1.08E-09 | 0.429166203  | 0.36  | 0.307 | 2.61E-05 | 1.2 |
| ARID2     | 1.12E-09 | -0.190671823 | 0.239 | 0.316 | 2.70E-05 | 1.2 |
| CHDH      | 1.12E-09 | -0.126491299 | 0.027 | 0.062 | 2.70E-05 | 1.2 |
| DUSP14    | 1.14E-09 | 0.146720257  | 0.063 | 0.033 | 2.75E-05 | 1.2 |
| TNS3      | 1.16E-09 | -0.190657314 | 0.048 | 0.09  | 2.79E-05 | 1.2 |
| IP6K2     | 1.17E-09 | -0.200333649 | 0.163 | 0.229 | 2.81E-05 | 1.2 |
| SULF2     | 1.19E-09 | -0.160967431 | 0.064 | 0.111 | 2.86E-05 | 1.2 |
| APOO      | 1.19E-09 | -0.122983733 | 0.988 | 0.98  | 2.87E-05 | 1.2 |
| ITPR3     | 1.25E-09 | 0.169868225  | 0.074 | 0.042 | 3.01E-05 | 1.2 |
| TRIM22    | 1.25E-09 | -0.139238944 | 0.07  | 0.118 | 3.01E-05 | 1.2 |
| CRNDE     | 1.26E-09 | -0.145261749 | 0.041 | 0.081 | 3.05E-05 | 1.2 |
| USP47     | 1.33E-09 | -0.14616586  | 0.253 | 0.33  | 3.21E-05 | 1.2 |
| CASC4     | 1.33E-09 | -0.177702818 | 0.136 | 0.198 | 3.22E-05 | 1.2 |
| ITGB3BP   | 1.34E-09 | -0.154156078 | 0.06  | 0.105 | 3.24E-05 | 1.2 |
| UQCR10    | 1.39E-09 | -0.142582584 | 0.336 | 0.419 | 3.35E-05 | 1.2 |
| EPB41L2   | 1.39E-09 | -0.257606789 | 0.144 | 0.206 | 3.36E-05 | 1.2 |
| BCL11A    | 1.41E-09 | -0.11767747  | 0.032 | 0.069 | 3.40E-05 | 1.2 |
| CCDC57    | 1.42E-09 | -0.144361488 | 0.036 | 0.075 | 3.43E-05 | 1.2 |
| ATP5A1    | 1.43E-09 | -0.130433246 | 0.133 | 0.195 | 3.45E-05 | 1.2 |
| TCEAL8    | 1.44E-09 | -0.152320966 | 0.267 | 0.348 | 3.46E-05 | 1.2 |

|           |          |              |       |       |          |     |
|-----------|----------|--------------|-------|-------|----------|-----|
| EPC1      | 1.44E-09 | -0.142209447 | 0.099 | 0.155 | 3.47E-05 | 1.2 |
| GOLGA3    | 1.52E-09 | 0.140991125  | 0.076 | 0.043 | 3.65E-05 | 1.2 |
| TMEM230   | 1.55E-09 | -0.135343485 | 0.039 | 0.078 | 3.74E-05 | 1.2 |
| HAUS1     | 1.57E-09 | -0.112398891 | 0.036 | 0.074 | 3.78E-05 | 1.2 |
| NR4A2     | 1.58E-09 | -0.142774702 | 0.029 | 0.064 | 3.82E-05 | 1.2 |
| ATRNL1    | 1.60E-09 | -0.194344445 | 0.046 | 0.087 | 3.87E-05 | 1.2 |
| PSME1     | 1.62E-09 | -0.134462949 | 0.15  | 0.214 | 3.92E-05 | 1.2 |
| GSTK1     | 1.68E-09 | -0.142314224 | 0.047 | 0.088 | 4.04E-05 | 1.2 |
| BACE2     | 1.74E-09 | 0.242687589  | 0.498 | 0.447 | 4.19E-05 | 1.2 |
| PPM1H     | 1.82E-09 | -0.189072389 | 0.315 | 0.398 | 4.39E-05 | 1.2 |
| SCMH1     | 1.86E-09 | -0.122594458 | 0.163 | 0.232 | 4.50E-05 | 1.2 |
| CATSPER2  | 1.88E-09 | -0.140570283 | 0.053 | 0.097 | 4.53E-05 | 1.2 |
| FAM20A    | 1.92E-09 | -0.133006301 | 0.04  | 0.079 | 4.62E-05 | 1.2 |
| ANKLE2    | 1.94E-09 | 0.156748757  | 0.152 | 0.105 | 4.68E-05 | 1.2 |
| GNPTAB    | 1.97E-09 | -0.182014501 | 0.074 | 0.122 | 4.75E-05 | 1.2 |
| STK17B    | 2.03E-09 | -0.186063513 | 0.083 | 0.134 | 4.90E-05 | 1.2 |
| CXCL6     | 2.04E-09 | -0.165820901 | 0.015 | 0.044 | 4.92E-05 | 1.2 |
| VGLL4     | 2.07E-09 | -0.206303812 | 0.213 | 0.283 | 5.00E-05 | 1.2 |
| HIP1      | 2.09E-09 | -0.145356314 | 0.057 | 0.102 | 5.04E-05 | 1.2 |
| ANXA4     | 2.09E-09 | -0.133001567 | 0.07  | 0.119 | 5.05E-05 | 1.2 |
| PMS1      | 2.11E-09 | -0.120017804 | 0.023 | 0.056 | 5.08E-05 | 1.2 |
| DIS3L2    | 2.12E-09 | -0.105834141 | 0.068 | 0.116 | 5.11E-05 | 1.2 |
| DRAM2     | 2.18E-09 | -0.16236066  | 0.233 | 0.308 | 5.26E-05 | 1.2 |
| VPS45     | 2.23E-09 | -0.132012756 | 0.055 | 0.098 | 5.37E-05 | 1.2 |
| C3orf35   | 2.23E-09 | 0.175990599  | 0.067 | 0.037 | 5.38E-05 | 1.2 |
| ALOX5     | 2.24E-09 | 0.212136501  | 0.17  | 0.122 | 5.40E-05 | 1.2 |
| SH3D19    | 2.25E-09 | 0.250892492  | 0.388 | 0.332 | 5.42E-05 | 1.2 |
| SUSD4     | 2.26E-09 | -0.100245692 | 0.013 | 0.041 | 5.44E-05 | 1.2 |
| PFN1      | 2.28E-09 | 0.212954815  | 0.218 | 0.166 | 5.50E-05 | 1.2 |
| C2orf76   | 2.33E-09 | -0.120384446 | 0.034 | 0.071 | 5.63E-05 | 1.2 |
| SHOC2     | 2.34E-09 | 0.192108818  | 0.264 | 0.208 | 5.65E-05 | 1.2 |
| AASDH     | 2.35E-09 | -0.101422257 | 0.029 | 0.064 | 5.67E-05 | 1.2 |
| NACA2     | 2.37E-09 | -0.209319554 | 0.586 | 0.651 | 5.72E-05 | 1.2 |
| MFSD14A   | 2.43E-09 | -0.188456795 | 0.096 | 0.148 | 5.85E-05 | 1.2 |
| CARS      | 2.44E-09 | 0.186525527  | 0.124 | 0.082 | 5.88E-05 | 1.2 |
| CXADR     | 2.44E-09 | -0.199574473 | 0.18  | 0.244 | 5.88E-05 | 1.2 |
| SIPA1L1   | 2.46E-09 | -0.158879427 | 0.294 | 0.374 | 5.94E-05 | 1.2 |
| S100A11   | 2.53E-09 | 0.196639528  | 0.758 | 0.691 | 6.11E-05 | 1.2 |
| EYA2      | 2.59E-09 | -0.15066588  | 0.154 | 0.219 | 6.25E-05 | 1.2 |
| EFHD1     | 2.70E-09 | -0.124248723 | 0.025 | 0.058 | 6.52E-05 | 1.2 |
| AC004231. | 2.79E-09 | 0.184202701  | 0.091 | 0.055 | 6.73E-05 | 1.2 |
| RP11-2900 | 2.86E-09 | -0.175077676 | 0.061 | 0.106 | 6.90E-05 | 1.2 |
| ARHGAP10  | 2.89E-09 | 0.245620101  | 0.173 | 0.125 | 6.97E-05 | 1.2 |
| AC016831. | 2.92E-09 | 0.228269815  | 0.301 | 0.243 | 7.04E-05 | 1.2 |
| PLRG1     | 2.93E-09 | -0.123851503 | 0.08  | 0.131 | 7.08E-05 | 1.2 |
| KLRD1     | 2.95E-09 | 0.193168862  | 0.102 | 0.064 | 7.11E-05 | 1.2 |
| BHLHE40   | 3.01E-09 | -0.168455149 | 0.067 | 0.112 | 7.25E-05 | 1.2 |

|           |          |              |       |       |           |     |
|-----------|----------|--------------|-------|-------|-----------|-----|
| CRYAB     | 3.04E-09 | -0.210225446 | 0.455 | 0.53  | 7.32E-05  | 1.2 |
| CRY2      | 3.09E-09 | -0.157626012 | 0.038 | 0.076 | 7.45E-05  | 1.2 |
| AK3       | 3.19E-09 | -0.1258924   | 0.092 | 0.145 | 7.68E-05  | 1.2 |
| DMTF1     | 3.42E-09 | 0.21568874   | 0.154 | 0.109 | 8.24E-05  | 1.2 |
| CRADD     | 3.45E-09 | -0.145244292 | 0.065 | 0.111 | 8.33E-05  | 1.2 |
| KCNMA1    | 3.47E-09 | 0.243639513  | 0.068 | 0.038 | 8.36E-05  | 1.2 |
| IL20      | 3.49E-09 | 0.139802196  | 0.027 | 0.009 | 8.42E-05  | 1.2 |
| RASSF8    | 3.53E-09 | 0.218119715  | 0.196 | 0.146 | 8.52E-05  | 1.2 |
| R3HDM1    | 3.58E-09 | -0.126711184 | 0.033 | 0.069 | 8.64E-05  | 1.2 |
| DEPTOR    | 3.60E-09 | -0.119757767 | 0.013 | 0.04  | 8.67E-05  | 1.2 |
| POLK      | 3.69E-09 | -0.157961215 | 0.098 | 0.152 | 8.89E-05  | 1.2 |
| RELA      | 3.70E-09 | 0.151782992  | 0.124 | 0.082 | 8.92E-05  | 1.2 |
| BEND7     | 3.74E-09 | 0.155732234  | 0.113 | 0.073 | 9.01E-05  | 1.2 |
| ZNF281    | 3.81E-09 | 0.154905991  | 0.124 | 0.082 | 9.18E-05  | 1.2 |
| NEK9      | 3.81E-09 | -0.104267157 | 0.04  | 0.079 | 9.20E-05  | 1.2 |
| RIPK2     | 3.85E-09 | -0.272523361 | 0.344 | 0.412 | 9.28E-05  | 1.2 |
| VCAM1     | 3.85E-09 | -0.110939734 | 0.003 | 0.022 | 9.29E-05  | 1.2 |
| ATP5H     | 3.90E-09 | -0.14496024  | 0.311 | 0.395 | 9.41E-05  | 1.2 |
| NFAT5     | 3.92E-09 | -0.203904131 | 0.566 | 0.643 | 9.46E-05  | 1.2 |
| C18orf8   | 3.94E-09 | 0.174963886  | 0.097 | 0.06  | 9.51E-05  | 1.2 |
| CNTNAP3   | 4.01E-09 | -0.153103284 | 0.034 | 0.07  | 9.66E-05  | 1.2 |
| IARS      | 4.07E-09 | 0.255246503  | 0.172 | 0.125 | 9.82E-05  | 1.2 |
| SMAD1     | 4.14E-09 | -0.12235475  | 0.054 | 0.097 | 9.99E-05  | 1.2 |
| DPH6      | 4.23E-09 | -0.145192218 | 0.04  | 0.078 | 0.000102  | 1.2 |
| MKL2      | 4.29E-09 | -0.190442865 | 0.204 | 0.275 | 0.0001035 | 1.2 |
| CREB3L2   | 4.32E-09 | -0.154843208 | 0.077 | 0.125 | 0.0001041 | 1.2 |
| TBC1D32   | 4.39E-09 | -0.139982722 | 0.028 | 0.062 | 0.0001058 | 1.2 |
| NASP      | 4.45E-09 | -0.147301658 | 0.134 | 0.195 | 0.0001073 | 1.2 |
| MBNL2     | 4.46E-09 | -0.191336254 | 0.345 | 0.424 | 0.0001075 | 1.2 |
| VPS50     | 4.47E-09 | -0.114422468 | 0.031 | 0.066 | 0.0001078 | 1.2 |
| COG7      | 4.69E-09 | -0.127699068 | 0.047 | 0.087 | 0.0001131 | 1.2 |
| IFI16     | 4.77E-09 | -0.175800774 | 0.222 | 0.291 | 0.000115  | 1.2 |
| KHDRBS3   | 4.91E-09 | 0.216651923  | 0.161 | 0.115 | 0.0001184 | 1.2 |
| PRELID2   | 5.12E-09 | 0.191607887  | 0.107 | 0.068 | 0.0001234 | 1.2 |
| MB21D2    | 5.21E-09 | -0.147908717 | 0.043 | 0.082 | 0.0001257 | 1.2 |
| CFL1      | 5.24E-09 | 0.300558452  | 0.286 | 0.231 | 0.0001263 | 1.2 |
| C6orf89   | 5.41E-09 | -0.109652161 | 0.048 | 0.089 | 0.0001306 | 1.2 |
| LARGE     | 5.49E-09 | 0.244208562  | 0.276 | 0.222 | 0.0001324 | 1.2 |
| XRCC4     | 5.55E-09 | -0.106447016 | 0.027 | 0.06  | 0.0001338 | 1.2 |
| ACTR2     | 5.60E-09 | 0.259812577  | 0.255 | 0.205 | 0.0001351 | 1.2 |
| ICE2      | 5.69E-09 | -0.107294574 | 0.026 | 0.058 | 0.0001371 | 1.2 |
| MRPS14    | 5.71E-09 | -0.117965636 | 0.115 | 0.172 | 0.0001378 | 1.2 |
| ADARB1    | 5.72E-09 | -0.105741887 | 0.031 | 0.066 | 0.0001379 | 1.2 |
| LINC00342 | 5.73E-09 | 0.168458137  | 0.092 | 0.056 | 0.0001381 | 1.2 |
| KALRN     | 5.79E-09 | -0.174095126 | 0.09  | 0.141 | 0.0001395 | 1.2 |
| C14orf159 | 5.90E-09 | -0.116493863 | 0.038 | 0.076 | 0.0001424 | 1.2 |
| HADHA     | 6.01E-09 | -0.178540149 | 0.294 | 0.371 | 0.000145  | 1.2 |

|          |          |              |       |       |           |     |
|----------|----------|--------------|-------|-------|-----------|-----|
| NAA38    | 6.06E-09 | -0.121574607 | 0.035 | 0.071 | 0.0001462 | 1.2 |
| CHIC2    | 6.29E-09 | 0.196995835  | 0.274 | 0.219 | 0.0001518 | 1.2 |
| CLASP2   | 6.49E-09 | -0.160319392 | 0.18  | 0.247 | 0.0001566 | 1.2 |
| GALK2    | 6.51E-09 | -0.145586403 | 0.046 | 0.085 | 0.0001569 | 1.2 |
| ATF4     | 6.59E-09 | 0.227691714  | 0.404 | 0.35  | 0.0001588 | 1.2 |
| FBXO9    | 6.60E-09 | -0.108720792 | 0.041 | 0.079 | 0.0001592 | 1.2 |
| HDGF     | 6.68E-09 | 0.265860134  | 0.303 | 0.253 | 0.0001612 | 1.2 |
| MARS     | 6.69E-09 | 0.198798826  | 0.172 | 0.124 | 0.0001612 | 1.2 |
| ZSWIM7   | 6.77E-09 | -0.135296222 | 0.043 | 0.081 | 0.0001632 | 1.2 |
| C7orf73  | 6.77E-09 | -0.12585074  | 0.078 | 0.127 | 0.0001633 | 1.2 |
| IGFBP3   | 6.88E-09 | 0.251799239  | 0.153 | 0.107 | 0.0001659 | 1.2 |
| S100A9   | 6.93E-09 | -0.149994645 | 0.039 | 0.076 | 0.000167  | 1.2 |
| MAP2K6   | 7.06E-09 | -0.118723561 | 0.012 | 0.037 | 0.0001702 | 1.2 |
| HCFC2    | 7.11E-09 | -0.107380858 | 0.016 | 0.043 | 0.0001713 | 1.2 |
| C3orf14  | 7.13E-09 | -0.137571683 | 0.048 | 0.087 | 0.000172  | 1.2 |
| CISD1    | 7.15E-09 | -0.133471854 | 0.172 | 0.239 | 0.0001724 | 1.2 |
| GK5      | 7.19E-09 | -0.106625573 | 0.039 | 0.076 | 0.0001733 | 1.2 |
| ANAPC13  | 7.28E-09 | -0.122970426 | 0.086 | 0.138 | 0.0001756 | 1.2 |
| PSMB8    | 7.29E-09 | -0.121290246 | 0.076 | 0.124 | 0.0001758 | 1.2 |
| COBLL1   | 7.47E-09 | -0.116447144 | 0.09  | 0.141 | 0.0001802 | 1.2 |
| SLC44A1  | 7.59E-09 | -0.121805655 | 0.058 | 0.101 | 0.000183  | 1.2 |
| HNRNPA1L | 7.60E-09 | -0.103698174 | 0.042 | 0.079 | 0.0001833 | 1.2 |
| LYRM2    | 7.64E-09 | -0.101616392 | 0.073 | 0.12  | 0.0001843 | 1.2 |
| LIAS     | 7.67E-09 | -0.113366809 | 0.036 | 0.073 | 0.000185  | 1.2 |
| PFDN5    | 7.76E-09 | -0.143960108 | 0.887 | 0.901 | 0.0001871 | 1.2 |
| ATP1B3   | 7.80E-09 | 0.238913566  | 0.31  | 0.256 | 0.0001881 | 1.2 |
| NSF      | 7.84E-09 | -0.170918071 | 0.114 | 0.169 | 0.000189  | 1.2 |
| SF3B6    | 7.86E-09 | 0.251629071  | 0.673 | 0.662 | 0.0001895 | 1.2 |
| RPS7     | 7.87E-09 | -0.124499286 | 0.978 | 0.966 | 0.0001898 | 1.2 |
| NBN      | 7.90E-09 | -0.103775542 | 0.038 | 0.075 | 0.0001904 | 1.2 |
| SPTBN1   | 7.93E-09 | -0.184076678 | 0.154 | 0.215 | 0.0001913 | 1.2 |
| RPS6KA3  | 7.97E-09 | 0.19382421   | 0.392 | 0.331 | 0.0001923 | 1.2 |
| CCDC90B  | 8.02E-09 | -0.124578252 | 0.063 | 0.107 | 0.0001933 | 1.2 |
| AKAP9    | 8.02E-09 | -0.152841866 | 0.3   | 0.38  | 0.0001933 | 1.2 |
| EIF3H    | 8.23E-09 | -0.150909608 | 0.641 | 0.715 | 0.0001985 | 1.2 |
| NUBPL    | 8.38E-09 | -0.131537639 | 0.035 | 0.07  | 0.000202  | 1.2 |
| CAMKMT   | 8.63E-09 | -0.148334951 | 0.118 | 0.174 | 0.0002082 | 1.2 |
| PEAK1    | 8.63E-09 | 0.207788639  | 0.22  | 0.169 | 0.0002082 | 1.2 |
| HOMER2   | 8.67E-09 | -0.2073762   | 0.168 | 0.229 | 0.0002091 | 1.2 |
| SGCE     | 8.69E-09 | -0.101424989 | 0.037 | 0.074 | 0.0002094 | 1.2 |
| TRIM2    | 8.72E-09 | -0.174991445 | 0.247 | 0.319 | 0.0002102 | 1.2 |
| DENND4C  | 8.75E-09 | -0.140876579 | 0.165 | 0.229 | 0.0002111 | 1.2 |
| XPR1     | 8.76E-09 | -0.124565997 | 0.084 | 0.133 | 0.0002112 | 1.2 |
| GTF2H5   | 8.86E-09 | -0.119621508 | 0.173 | 0.24  | 0.0002136 | 1.2 |
| INTS12   | 8.91E-09 | -0.187208378 | 0.148 | 0.206 | 0.0002148 | 1.2 |
| RABGAP1L | 9.04E-09 | -0.13525355  | 0.177 | 0.241 | 0.0002179 | 1.2 |
| NHS      | 9.12E-09 | -0.164714695 | 0.142 | 0.203 | 0.0002198 | 1.2 |

|         |          |              |       |       |           |     |
|---------|----------|--------------|-------|-------|-----------|-----|
| COL6A1  | 9.20E-09 | 0.222630094  | 0.069 | 0.039 | 0.0002217 | 1.2 |
| FAM208A | 9.51E-09 | -0.104498111 | 0.042 | 0.08  | 0.0002293 | 1.2 |
| DDIT3   | 9.58E-09 | -0.27876995  | 0.088 | 0.136 | 0.0002311 | 1.2 |
| RPS24   | 9.65E-09 | -0.109575427 | 0.988 | 0.981 | 0.0002327 | 1.2 |
| APBB2   | 9.69E-09 | -0.123400716 | 0.071 | 0.117 | 0.0002337 | 1.2 |
| GPAT3   | 9.81E-09 | 0.143536303  | 0.116 | 0.076 | 0.0002365 | 1.2 |
| CAB39   | 1.01E-08 | 0.303815258  | 0.317 | 0.266 | 0.000244  | 1.2 |
| ACADM   | 1.03E-08 | -0.101573018 | 0.051 | 0.092 | 0.0002478 | 1.2 |
| ZBTB10  | 1.04E-08 | -0.168694655 | 0.125 | 0.181 | 0.0002506 | 1.2 |
| TRMT10B | 1.06E-08 | -0.107097754 | 0.076 | 0.124 | 0.0002552 | 1.2 |
| ENSA    | 1.06E-08 | -0.148192797 | 0.318 | 0.4   | 0.0002567 | 1.2 |
| MBOAT1  | 1.08E-08 | -0.174069435 | 0.04  | 0.076 | 0.0002604 | 1.2 |
| SNTB1   | 1.09E-08 | -0.122434206 | 0.035 | 0.071 | 0.000262  | 1.2 |
| DRAM1   | 1.11E-08 | -0.139978967 | 0.124 | 0.181 | 0.0002684 | 1.2 |
| RRAS2   | 1.15E-08 | 0.20712142   | 0.267 | 0.214 | 0.0002762 | 1.2 |
| IRF1    | 1.16E-08 | -0.16013306  | 0.106 | 0.16  | 0.0002807 | 1.2 |
| ARHGEF3 | 1.18E-08 | -0.197706206 | 0.254 | 0.326 | 0.0002846 | 1.2 |
| ATR     | 1.20E-08 | -0.142700957 | 0.124 | 0.181 | 0.0002895 | 1.2 |
| MRPL27  | 1.21E-08 | -0.112146628 | 0.126 | 0.184 | 0.0002907 | 1.2 |
| HDAC8   | 1.21E-08 | -0.190774206 | 0.178 | 0.241 | 0.0002923 | 1.2 |
| UBE2H   | 1.22E-08 | 0.133309862  | 0.743 | 0.709 | 0.0002937 | 1.2 |
| EPHA4   | 1.22E-08 | -0.119530192 | 0.025 | 0.057 | 0.0002937 | 1.2 |
| PGAP1   | 1.24E-08 | -0.113226594 | 0.038 | 0.075 | 0.0002985 | 1.2 |
| NAP1L1  | 1.31E-08 | -0.154609831 | 0.379 | 0.462 | 0.0003153 | 1.2 |
| UBD     | 1.34E-08 | -0.14646676  | 0.125 | 0.181 | 0.0003227 | 1.2 |
| SF3A3   | 1.34E-08 | -0.111671622 | 0.05  | 0.09  | 0.0003233 | 1.2 |
| HDAC7   | 1.37E-08 | 0.212207771  | 0.167 | 0.121 | 0.00033   | 1.2 |
| IER3    | 1.39E-08 | -0.169076361 | 0.106 | 0.159 | 0.0003352 | 1.2 |
| ERBB4   | 1.40E-08 | -0.174621699 | 0.078 | 0.124 | 0.0003371 | 1.2 |
| TBCK    | 1.47E-08 | -0.154095697 | 0.088 | 0.136 | 0.0003539 | 1.2 |
| EIF1    | 1.49E-08 | 0.293194202  | 0.466 | 0.418 | 0.0003593 | 1.2 |
| DCTN4   | 1.52E-08 | -0.168597254 | 0.128 | 0.183 | 0.0003667 | 1.2 |
| VPS13D  | 1.57E-08 | -0.108985081 | 0.265 | 0.343 | 0.0003787 | 1.2 |
| OST4    | 1.60E-08 | -0.11586617  | 0.293 | 0.37  | 0.0003848 | 1.2 |
| CCDC64  | 1.64E-08 | -0.105000788 | 0.014 | 0.039 | 0.0003959 | 1.2 |
| ARMT1   | 1.75E-08 | -0.114055404 | 0.057 | 0.099 | 0.0004224 | 1.2 |
| WDR7    | 1.81E-08 | -0.12808237  | 0.027 | 0.059 | 0.0004365 | 1.2 |
| EEF1A1  | 1.84E-08 | -0.103350723 | 0.987 | 0.982 | 0.0004446 | 1.2 |
| TTC14   | 1.88E-08 | -0.1276366   | 0.045 | 0.083 | 0.0004537 | 1.2 |
| MORF4L2 | 1.89E-08 | 0.168077607  | 0.754 | 0.744 | 0.0004549 | 1.2 |
| HMG2    | 1.90E-08 | -0.112355681 | 0.036 | 0.071 | 0.0004578 | 1.2 |
| IRX2    | 1.93E-08 | -0.107023287 | 0.049 | 0.088 | 0.0004643 | 1.2 |
| HMGB1   | 2.01E-08 | -0.153650676 | 0.48  | 0.557 | 0.0004858 | 1.2 |
| MTERF4  | 2.08E-08 | -0.10147136  | 0.055 | 0.095 | 0.0005026 | 1.2 |
| NRDC    | 2.13E-08 | -0.15547303  | 0.133 | 0.189 | 0.0005143 | 1.2 |
| SPP1    | 2.15E-08 | -0.35958357  | 0.006 | 0.026 | 0.000518  | 1.2 |
| ZMYM5   | 2.19E-08 | -0.148720097 | 0.129 | 0.184 | 0.0005272 | 1.2 |

|          |          |              |       |       |           |     |
|----------|----------|--------------|-------|-------|-----------|-----|
| MAP3K9   | 2.19E-08 | 0.19349436   | 0.212 | 0.162 | 0.0005286 | 1.2 |
| MSN      | 2.21E-08 | 0.165972193  | 0.495 | 0.457 | 0.000533  | 1.2 |
| OXCT1    | 2.25E-08 | -0.11137108  | 0.021 | 0.049 | 0.0005422 | 1.2 |
| FOS      | 2.32E-08 | -0.246435183 | 0.195 | 0.258 | 0.0005597 | 1.2 |
| KRIT1    | 2.34E-08 | -0.149842843 | 0.086 | 0.133 | 0.0005652 | 1.2 |
| RALGAPA1 | 2.37E-08 | -0.166640983 | 0.186 | 0.25  | 0.0005715 | 1.2 |
| GNAI3    | 2.40E-08 | 0.227003247  | 0.197 | 0.149 | 0.0005787 | 1.2 |
| STEAP3   | 2.55E-08 | -0.108531337 | 0.022 | 0.051 | 0.0006144 | 1.2 |
| PTPRF    | 2.60E-08 | -0.152261181 | 0.059 | 0.099 | 0.000627  | 1.2 |
| HINT3    | 2.67E-08 | -0.102418492 | 0.033 | 0.067 | 0.0006438 | 1.2 |
| PSMB2    | 2.67E-08 | -0.129014124 | 0.1   | 0.15  | 0.000644  | 1.2 |
| MSMO1    | 2.72E-08 | -0.141547585 | 0.216 | 0.285 | 0.0006548 | 1.2 |
| GMPR2    | 2.72E-08 | -0.111048966 | 0.052 | 0.091 | 0.0006566 | 1.2 |
| RSRC1    | 2.76E-08 | -0.131874896 | 0.203 | 0.273 | 0.0006664 | 1.2 |
| C5orf17  | 2.77E-08 | -0.179953277 | 0.038 | 0.073 | 0.0006688 | 1.2 |
| HSF2     | 2.79E-08 | -0.155064603 | 0.054 | 0.093 | 0.0006724 | 1.2 |
| TPD52L1  | 2.83E-08 | -0.178421622 | 0.178 | 0.239 | 0.0006827 | 1.2 |
| PGM2L1   | 3.01E-08 | 0.185623884  | 0.141 | 0.1   | 0.0007265 | 1.2 |
| LCORL    | 3.06E-08 | -0.15806031  | 0.083 | 0.129 | 0.0007379 | 1.2 |
| ATXN7L1  | 3.08E-08 | -0.126951518 | 0.035 | 0.068 | 0.0007423 | 1.2 |
| RSL24D1  | 3.11E-08 | 0.180958166  | 0.759 | 0.741 | 0.0007492 | 1.2 |
| PHB2     | 3.20E-08 | -0.112753881 | 0.077 | 0.123 | 0.0007721 | 1.2 |
| BTBD11   | 3.23E-08 | -0.13803502  | 0.046 | 0.084 | 0.0007797 | 1.2 |
| CAP2     | 3.34E-08 | -0.130563988 | 0.065 | 0.107 | 0.0008049 | 1.2 |
| RNF213   | 3.39E-08 | -0.138969212 | 0.136 | 0.193 | 0.0008179 | 1.2 |
| PDXK     | 3.41E-08 | -0.169170257 | 0.119 | 0.173 | 0.0008222 | 1.2 |
| NDUFB9   | 3.46E-08 | -0.117777719 | 0.152 | 0.211 | 0.0008334 | 1.2 |
| ZFH3     | 3.53E-08 | -0.106451783 | 0.08  | 0.126 | 0.0008522 | 1.2 |
| ENOX2    | 3.61E-08 | -0.108294048 | 0.031 | 0.063 | 0.0008695 | 1.2 |
| DHFR     | 3.66E-08 | 0.198616544  | 0.862 | 0.845 | 0.0008816 | 1.2 |
| CBY1     | 3.66E-08 | -0.103327878 | 0.044 | 0.081 | 0.0008823 | 1.2 |
| INO80D   | 3.71E-08 | 0.197524264  | 0.546 | 0.488 | 0.0008956 | 1.2 |
| PPIP5K1  | 3.75E-08 | -0.10747031  | 0.023 | 0.052 | 0.0009032 | 1.2 |
| C11orf80 | 3.83E-08 | -0.146286049 | 0.171 | 0.232 | 0.000923  | 1.2 |
| TOP2B    | 3.88E-08 | -0.166705254 | 0.135 | 0.19  | 0.0009348 | 1.2 |
| DDI2     | 3.90E-08 | -0.102822106 | 0.07  | 0.115 | 0.0009412 | 1.2 |
| HIVEP1   | 3.92E-08 | 0.198122722  | 0.196 | 0.149 | 0.0009463 | 1.2 |
| ATP6V1G1 | 3.97E-08 | -0.117286125 | 0.299 | 0.378 | 0.0009575 | 1.2 |
| NRG2     | 3.97E-08 | -0.105344369 | 0.034 | 0.067 | 0.0009578 | 1.2 |
| KMT5B    | 3.98E-08 | -0.136245895 | 0.119 | 0.173 | 0.0009587 | 1.2 |
| MLLT10   | 4.03E-08 | -0.156288585 | 0.122 | 0.177 | 0.0009723 | 1.2 |
| DPYD-AS1 | 4.06E-08 | -0.127912293 | 0.059 | 0.1   | 0.0009792 | 1.2 |
| PPP2R5A  | 4.08E-08 | -0.142960081 | 0.109 | 0.16  | 0.0009841 | 1.2 |
| MLH3     | 4.11E-08 | -0.117604178 | 0.067 | 0.11  | 0.000991  | 1.2 |
| DNTTIP2  | 4.19E-08 | 0.263647208  | 0.252 | 0.206 | 0.0010104 | 1.2 |
| SFN      | 4.20E-08 | 0.116475239  | 0.033 | 0.014 | 0.0010122 | 1.2 |
| EEF2K    | 4.31E-08 | -0.10159041  | 0.017 | 0.043 | 0.0010388 | 1.2 |



|           |          |              |       |       |           |     |
|-----------|----------|--------------|-------|-------|-----------|-----|
| MON2      | 4.32E-08 | -0.140204943 | 0.207 | 0.272 | 0.0010414 | 1.2 |
| CACNA2D1  | 4.42E-08 | -0.127127838 | 0.022 | 0.051 | 0.0010668 | 1.2 |
| AC005042. | 4.53E-08 | -0.150912303 | 0.044 | 0.081 | 0.0010934 | 1.2 |
| KRT7      | 4.59E-08 | 0.217973486  | 0.321 | 0.265 | 0.0011076 | 1.2 |
| RAD23B    | 4.67E-08 | -0.280440317 | 0.369 | 0.434 | 0.0011252 | 1.2 |
| PGBD5     | 4.78E-08 | 0.153490724  | 0.108 | 0.072 | 0.0011515 | 1.2 |
| TNFAIP8   | 4.81E-08 | 0.323201211  | 0.438 | 0.393 | 0.0011607 | 1.2 |
| SMARCA1   | 4.82E-08 | 0.193083128  | 0.181 | 0.135 | 0.001163  | 1.2 |
| CKS1B     | 4.84E-08 | -0.113203118 | 0.326 | 0.409 | 0.0011663 | 1.2 |
| RALY      | 4.87E-08 | 0.198118456  | 0.191 | 0.145 | 0.0011751 | 1.2 |
| POMP      | 5.13E-08 | 0.228929784  | 0.677 | 0.656 | 0.0012366 | 1.2 |
| MYCBP2    | 5.19E-08 | -0.144182067 | 0.13  | 0.185 | 0.0012516 | 1.2 |
| YY1AP1    | 5.29E-08 | -0.137062789 | 0.127 | 0.18  | 0.0012749 | 1.2 |
| SOX9      | 5.33E-08 | 0.221129547  | 0.237 | 0.189 | 0.0012847 | 1.2 |
| AKAP1     | 5.68E-08 | -0.102951238 | 0.018 | 0.044 | 0.0013688 | 1.2 |
| CLEC2B    | 5.73E-08 | -0.19967281  | 0.081 | 0.126 | 0.0013815 | 1.2 |
| PARN      | 5.98E-08 | -0.110686046 | 0.054 | 0.093 | 0.0014432 | 1.2 |
| RAD21     | 5.99E-08 | -0.214837835 | 0.309 | 0.374 | 0.0014452 | 1.2 |
| SNX10     | 6.01E-08 | -0.110466815 | 0.029 | 0.06  | 0.00145   | 1.2 |
| FAM213A   | 6.16E-08 | -0.103955613 | 0.05  | 0.087 | 0.0014863 | 1.2 |
| HEY2      | 6.16E-08 | -0.11069668  | 0.015 | 0.04  | 0.0014865 | 1.2 |
| IAH1      | 6.19E-08 | 0.215061158  | 0.171 | 0.127 | 0.001493  | 1.2 |
| AC097724. | 6.28E-08 | -0.124425828 | 0.056 | 0.095 | 0.001515  | 1.2 |
| NEK10     | 6.45E-08 | 0.198767065  | 0.154 | 0.111 | 0.0015551 | 1.2 |
| CDC26     | 6.52E-08 | -0.121773514 | 0.173 | 0.235 | 0.0015716 | 1.2 |
| ZNF235    | 6.55E-08 | -0.123047695 | 0.047 | 0.084 | 0.0015783 | 1.2 |
| VASP      | 6.62E-08 | 0.153300657  | 0.065 | 0.038 | 0.001597  | 1.2 |
| RERG      | 6.71E-08 | -0.174410386 | 0.117 | 0.169 | 0.001617  | 1.2 |
| TAF4B     | 6.77E-08 | -0.135221757 | 0.041 | 0.075 | 0.0016313 | 1.2 |
| GHITM     | 6.81E-08 | -0.119425506 | 0.415 | 0.5   | 0.0016413 | 1.2 |
| SHFM1     | 6.88E-08 | -0.14767396  | 0.577 | 0.643 | 0.0016599 | 1.2 |
| TMEM123   | 7.01E-08 | -0.217056923 | 0.367 | 0.44  | 0.0016907 | 1.2 |
| WDR33     | 7.07E-08 | -0.145586013 | 0.258 | 0.328 | 0.0017052 | 1.2 |
| LSM3      | 7.39E-08 | -0.157588565 | 0.269 | 0.335 | 0.001781  | 1.2 |
| TBC1D3P1- | 7.43E-08 | -0.169965515 | 0.72  | 0.76  | 0.0017912 | 1.2 |
| ATF2      | 7.53E-08 | -0.157043761 | 0.097 | 0.143 | 0.0018157 | 1.2 |
| ROR1      | 7.57E-08 | -0.147276128 | 0.018 | 0.044 | 0.0018259 | 1.2 |
| SOD2      | 7.61E-08 | -0.156183417 | 0.955 | 0.942 | 0.0018342 | 1.2 |
| PERP      | 7.81E-08 | 0.223351055  | 0.364 | 0.318 | 0.0018831 | 1.2 |
| CCDC82    | 7.83E-08 | 0.198475544  | 0.29  | 0.239 | 0.0018892 | 1.2 |
| WAC       | 7.98E-08 | -0.257829572 | 0.579 | 0.642 | 0.0019234 | 1.2 |
| STIP1     | 7.99E-08 | 0.129278299  | 0.078 | 0.047 | 0.0019274 | 1.2 |
| HGSNAT    | 8.05E-08 | -0.131324929 | 0.125 | 0.179 | 0.0019399 | 1.2 |
| TEAD2     | 8.05E-08 | -0.100389573 | 0.045 | 0.081 | 0.0019417 | 1.2 |
| PLCH1     | 8.07E-08 | -0.101708697 | 0.018 | 0.044 | 0.0019465 | 1.2 |
| ADGRL3-AS | 8.20E-08 | 0.198482887  | 0.68  | 0.662 | 0.0019782 | 1.2 |
| DCAF5     | 8.36E-08 | -0.125628149 | 0.088 | 0.134 | 0.0020147 | 1.2 |

|           |          |              |       |       |           |     |
|-----------|----------|--------------|-------|-------|-----------|-----|
| CCL20     | 8.42E-08 | 0.907081571  | 0.338 | 0.293 | 0.0020308 | 1.2 |
| EIF5B     | 8.45E-08 | 0.255218269  | 0.256 | 0.212 | 0.0020385 | 1.2 |
| S100A13   | 8.52E-08 | -0.146766527 | 0.546 | 0.622 | 0.0020543 | 1.2 |
| EMC2      | 8.60E-08 | -0.116840267 | 0.152 | 0.209 | 0.0020734 | 1.2 |
| PDK1      | 8.60E-08 | -0.212884208 | 0.085 | 0.128 | 0.0020747 | 1.2 |
| MTX2      | 8.90E-08 | -0.101759123 | 0.043 | 0.078 | 0.0021467 | 1.2 |
| ZBTB20    | 9.04E-08 | -0.183722366 | 0.423 | 0.498 | 0.0021807 | 1.2 |
| DUSP6     | 9.18E-08 | -0.105394478 | 0.023 | 0.051 | 0.0022125 | 1.2 |
| NEO1      | 9.25E-08 | -0.132762946 | 0.055 | 0.093 | 0.0022307 | 1.2 |
| HPS5      | 9.47E-08 | -0.142591821 | 0.178 | 0.238 | 0.0022839 | 1.2 |
| ESRRG     | 9.63E-08 | -0.103822501 | 0.014 | 0.038 | 0.0023231 | 1.2 |
| RPS18     | 9.72E-08 | -0.121208082 | 0.613 | 0.695 | 0.0023437 | 1.2 |
| TPM3      | 9.84E-08 | 0.163631137  | 0.142 | 0.102 | 0.0023723 | 1.2 |
| RP11-318C | 9.88E-08 | -0.10095925  | 0.024 | 0.053 | 0.002382  | 1.2 |
| AKR1B1    | 1.01E-07 | -0.183765278 | 0.044 | 0.079 | 0.0024375 | 1.2 |
| EPB42     | 1.01E-07 | 0.208952806  | 0.923 | 0.928 | 0.0024406 | 1.2 |
| DLG2      | 1.02E-07 | -0.172774057 | 0.126 | 0.179 | 0.0024683 | 1.2 |
| FTL       | 1.03E-07 | 0.758647975  | 0.541 | 0.535 | 0.0024811 | 1.2 |
| GANAB     | 1.03E-07 | -0.121203632 | 0.07  | 0.111 | 0.0024854 | 1.2 |
| PVT1      | 1.03E-07 | 0.319406513  | 0.422 | 0.381 | 0.0024944 | 1.2 |
| HDAC9     | 1.04E-07 | 0.234834885  | 0.274 | 0.224 | 0.0025166 | 1.2 |
| GBF1      | 1.05E-07 | -0.127790372 | 0.164 | 0.225 | 0.0025363 | 1.2 |
| IRF2BP2   | 1.12E-07 | -0.1432273   | 0.096 | 0.143 | 0.0026972 | 1.2 |
| MID1      | 1.13E-07 | -0.152627981 | 0.085 | 0.129 | 0.0027289 | 1.2 |
| ORC3      | 1.15E-07 | -0.106997158 | 0.052 | 0.09  | 0.0027707 | 1.2 |
| HNRNPM    | 1.17E-07 | -0.194105561 | 0.153 | 0.206 | 0.0028092 | 1.2 |
| ATP6V1D   | 1.19E-07 | 0.274960369  | 0.326 | 0.283 | 0.0028577 | 1.2 |
| RPL5      | 1.21E-07 | -0.117152742 | 0.977 | 0.973 | 0.0029214 | 1.2 |
| FAM172A   | 1.22E-07 | 0.207603844  | 0.755 | 0.746 | 0.0029514 | 1.2 |
| NAA25     | 1.23E-07 | -0.245823751 | 0.268 | 0.332 | 0.0029645 | 1.2 |
| ATXN3     | 1.26E-07 | -0.149144046 | 0.127 | 0.178 | 0.0030335 | 1.2 |
| PIGR      | 1.27E-07 | -0.302071983 | 0.467 | 0.533 | 0.0030625 | 1.2 |
| UQCRHL    | 1.29E-07 | -0.14905157  | 0.229 | 0.294 | 0.0030996 | 1.2 |
| FRYL      | 1.31E-07 | 0.220754073  | 0.312 | 0.263 | 0.0031665 | 1.2 |
| TAX1BP1   | 1.34E-07 | 0.161608154  | 0.679 | 0.666 | 0.0032198 | 1.2 |
| GSK3B     | 1.34E-07 | 0.260376884  | 0.331 | 0.287 | 0.0032213 | 1.2 |
| ACBD6     | 1.34E-07 | -0.122238733 | 0.044 | 0.078 | 0.003243  | 1.2 |
| RPS2      | 1.35E-07 | -0.145329749 | 0.322 | 0.393 | 0.003249  | 1.2 |
| KIF13B    | 1.35E-07 | 0.205617742  | 0.336 | 0.283 | 0.0032593 | 1.2 |
| ACOT9     | 1.37E-07 | 0.166371156  | 0.11  | 0.075 | 0.0032923 | 1.2 |
| ASCC3     | 1.39E-07 | -0.148567765 | 0.163 | 0.222 | 0.0033618 | 1.2 |
| PDIA3     | 1.40E-07 | -0.168603336 | 0.22  | 0.285 | 0.003381  | 1.2 |
| PPP2R1B   | 1.42E-07 | -0.139717969 | 0.071 | 0.112 | 0.003415  | 1.2 |
| SMARCA4   | 1.44E-07 | -0.110559087 | 0.105 | 0.153 | 0.0034757 | 1.2 |
| KRT19     | 1.53E-07 | 0.274603162  | 0.359 | 0.305 | 0.0036844 | 1.2 |
| METTL15   | 1.53E-07 | -0.115322409 | 0.095 | 0.142 | 0.0036846 | 1.2 |
| KLF10     | 1.53E-07 | -0.142609962 | 0.074 | 0.116 | 0.0036892 | 1.2 |

|           |          |              |       |       |           |     |
|-----------|----------|--------------|-------|-------|-----------|-----|
| MFSD1     | 1.55E-07 | -0.102935317 | 0.032 | 0.062 | 0.0037419 | 1.2 |
| WDR70     | 1.57E-07 | -0.17153294  | 0.095 | 0.141 | 0.00379   | 1.2 |
| MYH14     | 1.57E-07 | 0.181077683  | 0.205 | 0.16  | 0.0037942 | 1.2 |
| CTC-490E2 | 1.59E-07 | 0.109962826  | 0.066 | 0.039 | 0.0038313 | 1.2 |
| BDNF-AS   | 1.62E-07 | -0.13839875  | 0.629 | 0.69  | 0.0039018 | 1.2 |
| CRK       | 1.63E-07 | 0.166057005  | 0.163 | 0.121 | 0.0039414 | 1.2 |
| NAV1      | 1.65E-07 | 0.12187513   | 0.065 | 0.038 | 0.0039675 | 1.2 |
| HSD11B1   | 1.67E-07 | -0.181366915 | 0.154 | 0.209 | 0.0040255 | 1.2 |
| SECISBP2  | 1.70E-07 | -0.108622445 | 0.051 | 0.088 | 0.0041074 | 1.2 |
| NUTF2     | 1.74E-07 | 0.13830262   | 0.094 | 0.062 | 0.0041881 | 1.2 |
| MIS18BP1  | 1.89E-07 | -0.117220337 | 0.093 | 0.14  | 0.0045666 | 1.2 |
| GRB2      | 1.92E-07 | 0.19005044   | 0.161 | 0.121 | 0.0046405 | 1.2 |
| RBP1      | 1.94E-07 | 0.145023235  | 0.064 | 0.038 | 0.0046806 | 1.2 |
| RP11-774D | 1.95E-07 | -0.116385235 | 0.036 | 0.068 | 0.0047123 | 1.2 |
| CEBPB     | 1.96E-07 | -0.133818719 | 0.108 | 0.156 | 0.0047381 | 1.2 |
| EMSY      | 1.98E-07 | -0.118654287 | 0.094 | 0.141 | 0.004774  | 1.2 |
| ADAM17    | 1.98E-07 | 0.226223931  | 0.456 | 0.412 | 0.0047748 | 1.2 |
| ATP6V1H   | 2.00E-07 | -0.126959404 | 0.066 | 0.106 | 0.0048238 | 1.2 |
| SAA4      | 2.06E-07 | 0.2841372    | 0.313 | 0.268 | 0.0049744 | 1.2 |
| SPINK5    | 2.18E-07 | -0.136995265 | 0.006 | 0.024 | 0.005248  | 1.2 |
| CD83      | 2.23E-07 | -0.177720079 | 0.069 | 0.108 | 0.0053684 | 1.2 |
| RBMS1     | 2.23E-07 | 0.228344436  | 0.302 | 0.256 | 0.0053849 | 1.2 |
| TBC1D8    | 2.26E-07 | -0.197284971 | 0.352 | 0.421 | 0.0054541 | 1.2 |
| SRSF2     | 2.32E-07 | 0.156015391  | 0.114 | 0.078 | 0.0055959 | 1.2 |
| LGALS2    | 2.33E-07 | -0.13779496  | 0.019 | 0.045 | 0.0056172 | 1.2 |
| BZW1      | 2.34E-07 | 0.193749173  | 0.187 | 0.144 | 0.0056499 | 1.2 |
| DAPL1     | 2.35E-07 | -0.139388272 | 0.028 | 0.056 | 0.0056675 | 1.2 |
| ANKRD37   | 2.42E-07 | -0.126581588 | 0.04  | 0.073 | 0.0058324 | 1.2 |
| AHI1      | 2.46E-07 | -0.173467229 | 0.164 | 0.219 | 0.0059214 | 1.2 |
| C10orf76  | 2.48E-07 | -0.140047914 | 0.097 | 0.144 | 0.0059702 | 1.2 |
| LSM14A    | 2.48E-07 | -0.17399467  | 0.299 | 0.365 | 0.0059876 | 1.2 |
| TMEM99    | 2.55E-07 | -0.102971472 | 0.051 | 0.086 | 0.0061557 | 1.2 |
| C9orf3    | 2.58E-07 | -0.147038286 | 0.127 | 0.179 | 0.0062256 | 1.2 |
| S100A7    | 2.60E-07 | -0.496953042 | 0.012 | 0.034 | 0.0062743 | 1.2 |
| CCPG1     | 2.60E-07 | -0.103924846 | 0.04  | 0.073 | 0.0062786 | 1.2 |
| TMEM45A   | 2.61E-07 | -0.148954967 | 0.119 | 0.168 | 0.0062864 | 1.2 |
| DPH5      | 2.69E-07 | -0.107110484 | 0.056 | 0.092 | 0.0064812 | 1.2 |
| SMURF1    | 2.70E-07 | 0.204337037  | 0.302 | 0.255 | 0.006505  | 1.2 |
| SCLT1     | 2.70E-07 | -0.113614436 | 0.026 | 0.053 | 0.0065054 | 1.2 |
| SUSD6     | 2.73E-07 | -0.133107382 | 0.173 | 0.231 | 0.0065827 | 1.2 |
| PRKAG1    | 2.74E-07 | -0.104909233 | 0.123 | 0.174 | 0.0066044 | 1.2 |
| USP9X     | 2.75E-07 | -0.158636478 | 0.275 | 0.343 | 0.0066285 | 1.2 |
| MITD1     | 2.78E-07 | -0.107191744 | 0.082 | 0.125 | 0.0067021 | 1.2 |
| PICALM    | 2.82E-07 | 0.187633553  | 0.447 | 0.403 | 0.0068069 | 1.2 |
| RFTN2     | 2.86E-07 | -0.103894937 | 0.006 | 0.024 | 0.0069032 | 1.2 |
| WRN       | 2.91E-07 | -0.154422531 | 0.146 | 0.198 | 0.0070191 | 1.2 |
| LINC00511 | 3.10E-07 | -0.206588111 | 0.087 | 0.13  | 0.0074659 | 1.2 |

|           |          |              |       |       |           |     |
|-----------|----------|--------------|-------|-------|-----------|-----|
| RP11-141M | 3.13E-07 | -0.146195928 | 0.042 | 0.074 | 0.007552  | 1.2 |
| RAP1A     | 3.15E-07 | 0.196612952  | 0.247 | 0.201 | 0.0075851 | 1.2 |
| CFL2      | 3.24E-07 | 0.196830669  | 0.148 | 0.109 | 0.0078115 | 1.2 |
| MED13L    | 3.24E-07 | -0.204416081 | 0.625 | 0.692 | 0.0078219 | 1.2 |
| TNFAIP1   | 3.30E-07 | 0.138742115  | 0.105 | 0.072 | 0.0079581 | 1.2 |
| JMY       | 3.32E-07 | -0.134141257 | 0.095 | 0.139 | 0.0079959 | 1.2 |
| SH3BP5    | 3.38E-07 | -0.138371897 | 0.068 | 0.107 | 0.008145  | 1.2 |
| ZFC3H1    | 3.45E-07 | 0.213784744  | 0.237 | 0.19  | 0.0083103 | 1.2 |
| ZNF438    | 3.55E-07 | -0.104059619 | 0.044 | 0.078 | 0.0085639 | 1.2 |
| CNIH1     | 3.64E-07 | -0.143931279 | 0.236 | 0.3   | 0.0087802 | 1.2 |
| LYRM5     | 3.65E-07 | -0.10259824  | 0.078 | 0.12  | 0.0087927 | 1.2 |
| CABIN1    | 3.68E-07 | -0.119876927 | 0.049 | 0.083 | 0.0088641 | 1.2 |
| ACP1      | 3.76E-07 | -0.122010354 | 0.347 | 0.421 | 0.0090598 | 1.2 |
| MOB4      | 3.76E-07 | -0.11911834  | 0.155 | 0.21  | 0.0090619 | 1.2 |
| PFKP      | 3.81E-07 | 0.134089365  | 0.051 | 0.028 | 0.0091932 | 1.2 |
| USP33     | 3.85E-07 | -0.146518696 | 0.176 | 0.232 | 0.0092906 | 1.2 |
| ARL15     | 3.91E-07 | -0.158429316 | 0.167 | 0.221 | 0.0094235 | 1.2 |
| SURF4     | 3.96E-07 | 0.131025311  | 0.068 | 0.041 | 0.0095501 | 1.2 |
| ZNF652    | 4.03E-07 | -0.153836575 | 0.522 | 0.593 | 0.0097286 | 1.2 |
| TMEM30A   | 4.05E-07 | 0.194365672  | 0.19  | 0.148 | 0.0097566 | 1.2 |
| PRELID3B  | 4.05E-07 | 0.201628391  | 0.318 | 0.275 | 0.0097597 | 1.2 |
| AEBP2     | 4.06E-07 | 0.249364835  | 0.279 | 0.234 | 0.0097834 | 1.2 |
| STX8      | 4.11E-07 | -0.14530545  | 0.159 | 0.212 | 0.009914  | 1.2 |
| MRPS31    | 4.11E-07 | -0.113014658 | 0.084 | 0.126 | 0.0099194 | 1.2 |
| KPNA4     | 4.15E-07 | 0.162303025  | 0.183 | 0.139 | 0.0100122 | 1.2 |
| RANBP2    | 4.15E-07 | -0.142428491 | 0.229 | 0.29  | 0.0100142 | 1.2 |
| SERPINB9  | 4.28E-07 | 0.241398997  | 0.195 | 0.148 | 0.0103107 | 1.2 |
| SLC15A4   | 4.44E-07 | 0.119689272  | 0.091 | 0.06  | 0.0107131 | 1.2 |
| MAP7      | 4.48E-07 | 0.226995023  | 0.364 | 0.323 | 0.0107941 | 1.2 |
| PHIP      | 4.49E-07 | -0.115299884 | 0.361 | 0.437 | 0.0108276 | 1.2 |
| BCOR      | 4.50E-07 | 0.206459576  | 0.47  | 0.414 | 0.01084   | 1.2 |
| ETS1      | 4.60E-07 | 0.167329052  | 0.174 | 0.132 | 0.0110949 | 1.2 |
| FRAS1     | 4.63E-07 | 0.209139054  | 0.088 | 0.058 | 0.0111743 | 1.2 |
| BDP1      | 4.64E-07 | -0.159247392 | 0.168 | 0.221 | 0.0111917 | 1.2 |
| RPL22L1   | 4.71E-07 | -0.114468414 | 0.501 | 0.579 | 0.011349  | 1.2 |
| ARHGEF28  | 4.84E-07 | -0.3935054   | 0.342 | 0.396 | 0.0116703 | 1.2 |
| BCL2L14   | 4.99E-07 | -0.134697196 | 0.111 | 0.157 | 0.0120361 | 1.2 |
| LRRC75A   | 5.00E-07 | -0.145355087 | 0.161 | 0.215 | 0.0120554 | 1.2 |
| PIP5K1B   | 5.01E-07 | -0.139531929 | 0.04  | 0.071 | 0.0120705 | 1.2 |
| EXOSC8    | 5.16E-07 | -0.120358397 | 0.112 | 0.16  | 0.0124499 | 1.2 |
| RNF152    | 5.24E-07 | -0.124152602 | 0.026 | 0.052 | 0.0126334 | 1.2 |
| MRPL48    | 5.24E-07 | -0.114267712 | 0.084 | 0.125 | 0.0126347 | 1.2 |
| PLAU      | 5.26E-07 | 0.10879838   | 0.046 | 0.024 | 0.0126857 | 1.2 |
| TMEM165   | 5.32E-07 | 0.199682471  | 0.51  | 0.467 | 0.0128394 | 1.2 |
| CIR1      | 5.35E-07 | -0.114433474 | 0.246 | 0.31  | 0.0129076 | 1.2 |
| NBEA      | 5.39E-07 | -0.151472055 | 0.079 | 0.119 | 0.0129851 | 1.2 |
| AIMP1     | 5.44E-07 | -0.156287591 | 0.368 | 0.436 | 0.0131069 | 1.2 |

|            |          |              |       |       |           |     |
|------------|----------|--------------|-------|-------|-----------|-----|
| GPM6B      | 5.45E-07 | 0.202141308  | 0.242 | 0.196 | 0.0131534 | 1.2 |
| RAPGEF2    | 5.54E-07 | 0.184888125  | 0.442 | 0.397 | 0.0133483 | 1.2 |
| SIK2       | 5.70E-07 | -0.203845091 | 0.281 | 0.339 | 0.0137526 | 1.2 |
| C14orf119  | 5.86E-07 | 0.214245895  | 0.228 | 0.186 | 0.014125  | 1.2 |
| TGFBR2     | 5.93E-07 | -0.175578546 | 0.093 | 0.136 | 0.014304  | 1.2 |
| OTUD3      | 6.00E-07 | -0.132326431 | 0.027 | 0.054 | 0.014476  | 1.2 |
| SCAF8      | 6.10E-07 | -0.143426779 | 0.187 | 0.244 | 0.0147166 | 1.2 |
| GAPDH      | 6.11E-07 | -0.121400663 | 0.543 | 0.622 | 0.0147428 | 1.2 |
| ASCC1      | 6.14E-07 | -0.114886624 | 0.133 | 0.183 | 0.0148048 | 1.2 |
| FUT8       | 6.15E-07 | -0.138135831 | 0.064 | 0.101 | 0.0148339 | 1.2 |
| PELI1      | 6.19E-07 | -0.177806295 | 0.399 | 0.47  | 0.0149333 | 1.2 |
| LRBA       | 6.26E-07 | -0.11615203  | 0.398 | 0.48  | 0.0151027 | 1.2 |
| IDO1       | 6.27E-07 | -0.192234369 | 0.02  | 0.044 | 0.0151198 | 1.2 |
| HAX1       | 6.33E-07 | -0.1124544   | 0.279 | 0.348 | 0.0152577 | 1.2 |
| CEP57      | 6.35E-07 | -0.115932879 | 0.075 | 0.115 | 0.0153222 | 1.2 |
| CDH3       | 6.42E-07 | 0.18811554   | 0.18  | 0.138 | 0.0154896 | 1.2 |
| UBE2E2     | 6.50E-07 | 0.174247683  | 0.438 | 0.392 | 0.015685  | 1.2 |
| ZNRF2      | 6.59E-07 | 0.234679961  | 0.191 | 0.151 | 0.0158823 | 1.2 |
| RBM39      | 6.60E-07 | -0.133297252 | 0.401 | 0.476 | 0.0159195 | 1.2 |
| KCNQ1      | 6.65E-07 | -0.114131218 | 0.067 | 0.105 | 0.0160383 | 1.2 |
| ROR2       | 6.76E-07 | -0.190752242 | 0.09  | 0.132 | 0.0162988 | 1.2 |
| PFDN4      | 6.81E-07 | -0.119249985 | 0.453 | 0.529 | 0.0164275 | 1.2 |
| RLF        | 6.91E-07 | -0.307911701 | 0.307 | 0.361 | 0.0166607 | 1.2 |
| DAPK2      | 7.01E-07 | 0.153314812  | 0.48  | 0.436 | 0.0169057 | 1.2 |
| BPTF       | 7.22E-07 | -0.147020242 | 0.283 | 0.35  | 0.0174193 | 1.2 |
| RGCC       | 7.41E-07 | -0.12376424  | 0.032 | 0.06  | 0.0178727 | 1.2 |
| VIM        | 7.62E-07 | 0.241200521  | 0.242 | 0.199 | 0.0183831 | 1.2 |
| MFHAS1     | 7.69E-07 | 0.153644561  | 0.075 | 0.047 | 0.0185475 | 1.2 |
| MOB1A      | 7.77E-07 | 0.131170899  | 0.108 | 0.075 | 0.0187457 | 1.2 |
| ZDHHC13    | 7.79E-07 | 0.163175926  | 0.134 | 0.097 | 0.0187863 | 1.2 |
| TTLL5      | 7.88E-07 | -0.121052884 | 0.136 | 0.186 | 0.0190115 | 1.2 |
| FBL        | 7.94E-07 | -0.10956497  | 0.174 | 0.229 | 0.0191355 | 1.2 |
| TATDN1     | 7.96E-07 | -0.157443129 | 0.26  | 0.322 | 0.0192015 | 1.2 |
| PARK7      | 7.99E-07 | -0.121753624 | 0.419 | 0.494 | 0.0192562 | 1.2 |
| VCP        | 8.27E-07 | 0.172056863  | 0.14  | 0.103 | 0.0199402 | 1.2 |
| KCNQ5      | 8.32E-07 | 0.205594977  | 0.093 | 0.062 | 0.0200639 | 1.2 |
| RP11-631N  | 8.47E-07 | 0.138204378  | 0.098 | 0.067 | 0.0204306 | 1.2 |
| GS1-114I9. | 8.60E-07 | 0.180853147  | 0.157 | 0.118 | 0.0207468 | 1.2 |
| USP12      | 8.72E-07 | 0.163554311  | 0.161 | 0.121 | 0.0210216 | 1.2 |
| SNX29      | 9.10E-07 | -0.134390232 | 0.075 | 0.114 | 0.0219451 | 1.2 |
| SUPT20H    | 9.12E-07 | -0.102698105 | 0.055 | 0.09  | 0.0219806 | 1.2 |
| CTTN       | 9.18E-07 | 0.178732571  | 0.209 | 0.165 | 0.0221243 | 1.2 |
| KANK1      | 9.32E-07 | 0.209441088  | 0.252 | 0.208 | 0.0224779 | 1.2 |
| ZSWIM6     | 9.46E-07 | 0.196243988  | 0.382 | 0.337 | 0.0228224 | 1.2 |
| ROPN1      | 9.50E-07 | -0.141323548 | 0.043 | 0.074 | 0.022903  | 1.2 |
| SLC11A2    | 9.52E-07 | -0.120385162 | 0.371 | 0.446 | 0.0229458 | 1.2 |
| NSUN6      | 9.52E-07 | -0.103194319 | 0.065 | 0.102 | 0.0229657 | 1.2 |

|           |          |              |       |       |           |     |
|-----------|----------|--------------|-------|-------|-----------|-----|
| THAP6     | 9.58E-07 | -0.106373088 | 0.047 | 0.079 | 0.0230999 | 1.2 |
| ATAD2B    | 9.64E-07 | -0.112244239 | 0.115 | 0.162 | 0.0232552 | 1.2 |
| RP11-711K | 9.72E-07 | -0.122248747 | 0.038 | 0.068 | 0.0234289 | 1.2 |
| CAMSAP1   | 9.80E-07 | 0.127505646  | 0.102 | 0.07  | 0.0236223 | 1.2 |
| RAB3GAP2  | 1.04E-06 | -0.131346976 | 0.145 | 0.196 | 0.0249824 | 1.2 |
| MAPK14    | 1.05E-06 | -0.15471932  | 0.14  | 0.189 | 0.025305  | 1.2 |
| PTEN      | 1.06E-06 | 0.185234916  | 0.851 | 0.85  | 0.0255575 | 1.2 |
| ARHGAP5   | 1.07E-06 | 0.229812803  | 0.419 | 0.381 | 0.0257254 | 1.2 |
| ELF2      | 1.07E-06 | -0.138221317 | 0.273 | 0.338 | 0.0257751 | 1.2 |
| ARHGEF38  | 1.08E-06 | -0.118955914 | 0.424 | 0.5   | 0.0259963 | 1.2 |
| HNRNPAB   | 1.08E-06 | 0.164994379  | 0.107 | 0.075 | 0.0260161 | 1.2 |
| PIGP      | 1.09E-06 | -0.126644128 | 0.124 | 0.171 | 0.0262368 | 1.2 |
| ZDHHC9    | 1.10E-06 | 0.152026097  | 0.161 | 0.122 | 0.0264937 | 1.2 |
| PHC3      | 1.14E-06 | -0.114301012 | 0.145 | 0.195 | 0.0275979 | 1.2 |
| UBR1      | 1.16E-06 | -0.107026375 | 0.096 | 0.139 | 0.0280572 | 1.2 |
| SCRN1     | 1.17E-06 | 0.116372066  | 0.088 | 0.058 | 0.0282162 | 1.2 |
| CACUL1    | 1.19E-06 | -0.140716082 | 0.344 | 0.417 | 0.0286079 | 1.2 |
| MYC       | 1.20E-06 | 0.179768958  | 0.181 | 0.139 | 0.028878  | 1.2 |
| VRK2      | 1.22E-06 | -0.10957977  | 0.141 | 0.192 | 0.0293397 | 1.2 |
| LINC01492 | 1.22E-06 | 0.175547098  | 0.162 | 0.124 | 0.0293504 | 1.2 |
| CAPZB     | 1.22E-06 | 0.198914196  | 0.171 | 0.133 | 0.0294972 | 1.2 |
| ZNF385D   | 1.22E-06 | -0.134341431 | 0.042 | 0.073 | 0.0295365 | 1.2 |
| HLCS      | 1.24E-06 | -0.108213664 | 0.058 | 0.093 | 0.0299285 | 1.2 |
| PPP2R5E   | 1.27E-06 | -0.180374245 | 0.23  | 0.287 | 0.030616  | 1.2 |
| RP11-293M | 1.28E-06 | -0.121745142 | 0.035 | 0.064 | 0.0309004 | 1.2 |
| STEAP1B   | 1.28E-06 | 0.189328408  | 0.947 | 0.955 | 0.0309704 | 1.2 |
| AMD1      | 1.31E-06 | 0.19096636   | 0.277 | 0.232 | 0.0316689 | 1.2 |
| CATSPERB  | 1.33E-06 | -0.131468402 | 0.201 | 0.259 | 0.0319575 | 1.2 |
| ZNF165    | 1.33E-06 | 0.156694363  | 0.086 | 0.057 | 0.0319863 | 1.2 |
| RASAL2    | 1.44E-06 | 0.11975881   | 0.57  | 0.534 | 0.0347482 | 1.2 |
| GLIS3     | 1.46E-06 | 0.292752017  | 0.321 | 0.278 | 0.0351591 | 1.2 |
| HADHB     | 1.46E-06 | -0.115784323 | 0.24  | 0.305 | 0.035306  | 1.2 |
| LURAP1L-A | 1.49E-06 | 0.126911595  | 0.118 | 0.084 | 0.0358306 | 1.2 |
| PTAR1     | 1.51E-06 | -0.121479058 | 0.067 | 0.103 | 0.0364863 | 1.2 |
| CNOT6L    | 1.52E-06 | -0.110382338 | 0.058 | 0.093 | 0.0367511 | 1.2 |
| RALGAPA2  | 1.60E-06 | -0.149905799 | 0.151 | 0.202 | 0.0386002 | 1.2 |
| RP11-368L | 1.62E-06 | 0.124084942  | 0.104 | 0.072 | 0.0390103 | 1.2 |
| KCNH8     | 1.64E-06 | 0.148084863  | 0.061 | 0.037 | 0.0395479 | 1.2 |
| MACF1     | 1.67E-06 | 0.21786585   | 0.641 | 0.632 | 0.0402803 | 1.2 |
| TNRC18    | 1.73E-06 | -0.101761973 | 0.038 | 0.067 | 0.041708  | 1.2 |
| ZC3HAV1   | 1.77E-06 | 0.16041627   | 0.142 | 0.106 | 0.0426259 | 1.2 |
| SFT2D2    | 1.80E-06 | -0.11004835  | 0.183 | 0.238 | 0.0433711 | 1.2 |
| KIDINS220 | 1.85E-06 | -0.115622361 | 0.139 | 0.189 | 0.0446364 | 1.2 |
| RBM47     | 1.86E-06 | -0.137604039 | 0.541 | 0.604 | 0.0448099 | 1.2 |
| ENO1      | 1.89E-06 | -0.100204139 | 0.462 | 0.531 | 0.0455711 | 1.2 |
| MRPL51    | 2.02E-06 | -0.126682037 | 0.37  | 0.441 | 0.0487086 | 1.2 |
| PIKFYVE   | 2.02E-06 | -0.124116682 | 0.073 | 0.109 | 0.0488009 | 1.2 |

|            |          |              |       |       |           |     |
|------------|----------|--------------|-------|-------|-----------|-----|
| TMEM184E   | 2.02E-06 | 0.166606927  | 0.165 | 0.126 | 0.0488274 | 1.2 |
| KIF9-AS1   | 2.04E-06 | -0.10451954  | 0.028 | 0.054 | 0.0491712 | 1.2 |
| SQSTM1     | 2.05E-06 | -0.130249123 | 0.234 | 0.294 | 0.0494717 | 1.2 |
| BARD1      | 2.09E-06 | 0.136918301  | 0.1   | 0.069 | 0.0504524 | 1.2 |
| FRK        | 2.10E-06 | 0.192804936  | 0.198 | 0.158 | 0.0507339 | 1.2 |
| KIF13A     | 2.11E-06 | -0.207508223 | 0.229 | 0.283 | 0.0507817 | 1.2 |
| GBP2       | 2.11E-06 | 0.176436349  | 0.757 | 0.753 | 0.0508242 | 1.2 |
| HNRNPLL    | 2.12E-06 | -0.110721413 | 0.083 | 0.121 | 0.0510703 | 1.2 |
| COL22A1    | 2.13E-06 | 0.103543497  | 0.051 | 0.03  | 0.0513215 | 1.2 |
| MAPK6      | 2.14E-06 | 0.175876482  | 0.248 | 0.204 | 0.0515747 | 1.2 |
| SGMS2      | 2.15E-06 | 0.163639189  | 0.213 | 0.169 | 0.0518532 | 1.2 |
| GIGYF2     | 2.21E-06 | -0.124591956 | 0.206 | 0.263 | 0.053393  | 1.2 |
| TOB1       | 2.22E-06 | -0.129205844 | 0.066 | 0.101 | 0.0535284 | 1.2 |
| CPSF6      | 2.24E-06 | 0.157631395  | 0.167 | 0.129 | 0.0539574 | 1.2 |
| TPTEP1     | 2.28E-06 | 0.200101065  | 0.266 | 0.223 | 0.055092  | 1.2 |
| GS1-24F4.2 | 2.32E-06 | -0.15286133  | 0.078 | 0.117 | 0.0559145 | 1.2 |
| CEP63      | 2.33E-06 | -0.10117435  | 0.057 | 0.091 | 0.0561339 | 1.2 |
| PLEKHA8    | 2.34E-06 | 0.121048511  | 0.099 | 0.068 | 0.056432  | 1.2 |
| PPP4R3A    | 2.35E-06 | -0.117059947 | 0.125 | 0.169 | 0.0566503 | 1.2 |
| RBL2       | 2.37E-06 | -0.122502526 | 0.069 | 0.105 | 0.0571343 | 1.2 |
| USP16      | 2.39E-06 | -0.115518568 | 0.156 | 0.206 | 0.0576814 | 1.2 |
| CSNK1E     | 2.44E-06 | 0.24603808   | 0.291 | 0.251 | 0.0588191 | 1.2 |
| LRRC28     | 2.45E-06 | -0.114885212 | 0.046 | 0.076 | 0.0590104 | 1.2 |
| CDC42EP4   | 2.45E-06 | -0.109371458 | 0.049 | 0.081 | 0.0590107 | 1.2 |
| BTBD10     | 2.49E-06 | 0.145320708  | 0.086 | 0.058 | 0.0600403 | 1.2 |
| FANK1      | 2.52E-06 | 0.151721619  | 0.096 | 0.066 | 0.0606442 | 1.2 |
| IGFBP7     | 2.54E-06 | -0.10352434  | 0.01  | 0.028 | 0.0613237 | 1.2 |
| POLR1D     | 2.55E-06 | -0.127184714 | 0.267 | 0.329 | 0.0615134 | 1.2 |
| RPL13      | 2.64E-06 | -0.130763249 | 0.445 | 0.515 | 0.0635853 | 1.2 |
| SLC25A36   | 2.71E-06 | -0.106105848 | 0.137 | 0.185 | 0.065424  | 1.2 |
| KIAA1468   | 2.75E-06 | -0.110295653 | 0.08  | 0.119 | 0.0662205 | 1.2 |
| STAG1      | 2.77E-06 | 0.172942607  | 0.504 | 0.474 | 0.0669057 | 1.2 |
| UBR3       | 2.79E-06 | -0.131982722 | 0.162 | 0.212 | 0.0671721 | 1.2 |
| FARP2      | 2.84E-06 | 0.134552352  | 0.107 | 0.075 | 0.0685162 | 1.2 |
| POLG2      | 2.91E-06 | -0.128418372 | 0.052 | 0.083 | 0.0701626 | 1.2 |
| EML5       | 2.93E-06 | -0.10511864  | 0.079 | 0.117 | 0.0707442 | 1.2 |
| ARID4A     | 2.97E-06 | -0.120648221 | 0.137 | 0.183 | 0.071624  | 1.2 |
| HSPD1      | 3.03E-06 | -0.131082821 | 0.286 | 0.351 | 0.0731305 | 1.2 |
| FBXW4      | 3.04E-06 | -0.101678448 | 0.053 | 0.085 | 0.073325  | 1.2 |
| PPP1R13L   | 3.06E-06 | 0.156099338  | 0.132 | 0.097 | 0.0737441 | 1.2 |
| FAM78B     | 3.07E-06 | 0.183935414  | 0.097 | 0.067 | 0.0740126 | 1.2 |
| AZGP1      | 3.11E-06 | -0.239431246 | 0.296 | 0.354 | 0.0749172 | 1.2 |
| EIF2B3     | 3.11E-06 | -0.128671434 | 0.05  | 0.08  | 0.0749902 | 1.2 |
| TMEM51     | 3.16E-06 | 0.165616292  | 0.206 | 0.166 | 0.0761603 | 1.2 |
| COPB1      | 3.21E-06 | 0.181073074  | 0.244 | 0.204 | 0.0773379 | 1.2 |
| EIF3M      | 3.26E-06 | -0.128634083 | 0.433 | 0.502 | 0.0786609 | 1.2 |
| TLR2       | 3.30E-06 | -0.110149584 | 0.211 | 0.27  | 0.0794918 | 1.2 |

|           |          |              |       |       |           |     |
|-----------|----------|--------------|-------|-------|-----------|-----|
| LINC00475 | 3.37E-06 | 0.18728031   | 0.11  | 0.079 | 0.0813173 | 1.2 |
| NLK       | 3.38E-06 | 0.174994405  | 0.128 | 0.095 | 0.0815998 | 1.2 |
| BBC3      | 3.48E-06 | 0.105982846  | 0.091 | 0.062 | 0.0838618 | 1.2 |
| HSPH1     | 3.52E-06 | 0.213404213  | 0.151 | 0.115 | 0.0848646 | 1.2 |
| SPOPL     | 3.55E-06 | -0.111143722 | 0.116 | 0.16  | 0.0857043 | 1.2 |
| RPS25     | 3.56E-06 | -0.138926619 | 0.851 | 0.87  | 0.0857651 | 1.2 |
| CPAMD8    | 3.67E-06 | 0.208830033  | 0.146 | 0.11  | 0.0885691 | 1.2 |
| KRAS      | 3.68E-06 | 0.144835633  | 0.174 | 0.134 | 0.0886212 | 1.2 |
| MPRIP-AS1 | 3.83E-06 | 0.11343397   | 0.077 | 0.05  | 0.0923595 | 1.2 |
| PEX13     | 4.00E-06 | -0.116109193 | 0.09  | 0.129 | 0.0963794 | 1.2 |
| CTBP2     | 4.07E-06 | 0.160257346  | 0.347 | 0.303 | 0.0981646 | 1.2 |
| TIPARP    | 4.09E-06 | 0.135182489  | 0.127 | 0.093 | 0.0987231 | 1.2 |
| ZNF22     | 4.15E-06 | -0.101081228 | 0.192 | 0.247 | 0.0999624 | 1.2 |
| ARHGEF2   | 4.36E-06 | 0.105979093  | 0.106 | 0.075 | 0.1051852 | 1.2 |
| SPTAN1    | 4.37E-06 | 0.185691527  | 0.213 | 0.173 | 0.10545   | 1.2 |
| OLFM4     | 4.39E-06 | -0.228083966 | 0.022 | 0.045 | 0.1057867 | 1.2 |
| HNRNPA2B  | 4.40E-06 | -0.117844269 | 0.368 | 0.437 | 0.1061436 | 1.2 |
| TBC1D9    | 4.42E-06 | -0.124659018 | 0.184 | 0.236 | 0.1066257 | 1.2 |
| CCDC109B  | 4.46E-06 | 0.151482481  | 0.082 | 0.055 | 0.1075278 | 1.2 |
| DRG1      | 4.47E-06 | -0.112026929 | 0.187 | 0.24  | 0.1078579 | 1.2 |
| SLC25A6   | 4.63E-06 | -0.143543998 | 0.107 | 0.148 | 0.1115515 | 1.2 |
| RP11-231C | 4.66E-06 | 0.163898962  | 0.226 | 0.184 | 0.1124406 | 1.2 |
| BAG5      | 4.70E-06 | 0.14598833   | 0.145 | 0.109 | 0.1134234 | 1.2 |
| ZZZ3      | 4.76E-06 | -0.122862173 | 0.14  | 0.188 | 0.1147675 | 1.2 |
| RAP1GAP2  | 4.76E-06 | -0.174498922 | 0.133 | 0.177 | 0.1147868 | 1.2 |
| MAP7D1    | 4.87E-06 | 0.111606207  | 0.163 | 0.124 | 0.1175176 | 1.2 |
| CTD-2337A | 4.88E-06 | -0.158988249 | 0.154 | 0.201 | 0.1176778 | 1.2 |
| SNRPD2    | 5.01E-06 | -0.134985637 | 0.706 | 0.756 | 0.1207137 | 1.2 |
| TYW3      | 5.03E-06 | -0.110875809 | 0.055 | 0.086 | 0.1212261 | 1.2 |
| REEP3     | 5.03E-06 | 0.19380278   | 0.279 | 0.236 | 0.12123   | 1.2 |
| TTLL4     | 5.06E-06 | -0.11291241  | 0.135 | 0.18  | 0.1219827 | 1.2 |
| PDE4D     | 5.06E-06 | -0.137251571 | 0.078 | 0.114 | 0.1220437 | 1.2 |
| EIF4E     | 5.10E-06 | 0.170877588  | 0.415 | 0.376 | 0.1229524 | 1.2 |
| RPS9      | 5.11E-06 | -0.112887615 | 0.251 | 0.312 | 0.1233241 | 1.2 |
| WDFY2     | 5.12E-06 | -0.113284132 | 0.157 | 0.206 | 0.1235417 | 1.2 |
| CTD-3088G | 5.16E-06 | 0.190333612  | 0.074 | 0.049 | 0.1244651 | 1.2 |
| BCL2L11   | 5.20E-06 | -0.109208503 | 0.036 | 0.063 | 0.1253147 | 1.2 |
| ZNF708    | 5.21E-06 | -0.149538232 | 0.064 | 0.098 | 0.1256319 | 1.2 |
| SC5D      | 5.24E-06 | -0.100624551 | 0.066 | 0.1   | 0.126253  | 1.2 |
| PHF14     | 5.24E-06 | -0.118933739 | 0.112 | 0.154 | 0.1264346 | 1.2 |
| LUC7L3    | 5.30E-06 | 0.185775688  | 0.333 | 0.289 | 0.1278966 | 1.2 |
| FGGY      | 5.32E-06 | -0.12745147  | 0.191 | 0.242 | 0.1283583 | 1.2 |
| NDUFB2    | 5.33E-06 | 0.10136414   | 0.041 | 0.022 | 0.128522  | 1.2 |
| IDE       | 5.34E-06 | -0.104129412 | 0.052 | 0.083 | 0.1288121 | 1.2 |
| MAP2K4    | 5.65E-06 | 0.224166562  | 0.397 | 0.359 | 0.1361606 | 1.2 |
| SFPQ      | 5.71E-06 | 0.195747772  | 0.251 | 0.211 | 0.1377577 | 1.2 |
| TMA7      | 5.73E-06 | -0.106729779 | 0.534 | 0.6   | 0.1381027 | 1.2 |



|           |          |              |       |       |           |     |
|-----------|----------|--------------|-------|-------|-----------|-----|
| CLIC6     | 6.14E-06 | -0.117439633 | 0.081 | 0.118 | 0.147957  | 1.2 |
| SENP6     | 6.25E-06 | -0.126564568 | 0.285 | 0.346 | 0.1507373 | 1.2 |
| SESN3     | 6.29E-06 | -0.147594199 | 0.057 | 0.089 | 0.1516168 | 1.2 |
| RBM5      | 6.31E-06 | -0.111360051 | 0.124 | 0.168 | 0.1521165 | 1.2 |
| CABLES1   | 6.88E-06 | -0.101136358 | 0.044 | 0.073 | 0.1658145 | 1.2 |
| RPL22     | 7.11E-06 | -0.132536681 | 0.755 | 0.806 | 0.1714153 | 1.2 |
| KMT2E     | 7.11E-06 | -0.150692623 | 0.355 | 0.416 | 0.1715254 | 1.2 |
| ACTN4     | 7.14E-06 | 0.268599784  | 0.367 | 0.326 | 0.1721607 | 1.2 |
| HEATR5B   | 7.22E-06 | -0.101464089 | 0.088 | 0.126 | 0.1741148 | 1.2 |
| ZCCHC8    | 7.23E-06 | -0.13809618  | 0.102 | 0.141 | 0.1744434 | 1.2 |
| RPS6KA2   | 7.24E-06 | 0.113819738  | 0.132 | 0.099 | 0.1745548 | 1.2 |
| KIAA0355  | 7.26E-06 | 0.157097136  | 0.16  | 0.124 | 0.1749915 | 1.2 |
| FGD4      | 7.26E-06 | 0.193512782  | 0.3   | 0.257 | 0.1750224 | 1.2 |
| AK6       | 7.27E-06 | 0.172151473  | 0.239 | 0.197 | 0.1751855 | 1.2 |
| SPARCL1   | 7.42E-06 | -0.109556221 | 0.052 | 0.082 | 0.1789582 | 1.2 |
| PABPC1    | 7.75E-06 | 0.152743198  | 0.796 | 0.787 | 0.1868537 | 1.2 |
| BNIP2     | 7.85E-06 | 0.172561945  | 0.142 | 0.109 | 0.1892695 | 1.2 |
| MTMR2     | 8.00E-06 | -0.102852958 | 0.082 | 0.119 | 0.1928149 | 1.2 |
| SGCD      | 8.02E-06 | -0.127045887 | 0.037 | 0.064 | 0.1934573 | 1.2 |
| DOCK5     | 8.04E-06 | 0.200339117  | 0.251 | 0.21  | 0.1938843 | 1.2 |
| HEBP2     | 8.64E-06 | 0.172839649  | 0.205 | 0.167 | 0.2082867 | 1.2 |
| CH17-189H | 8.65E-06 | -0.110022251 | 0.1   | 0.14  | 0.2084958 | 1.2 |
| GNL3      | 9.17E-06 | 0.197725505  | 0.305 | 0.269 | 0.2210687 | 1.2 |
| TMED5     | 9.19E-06 | 0.153918282  | 0.131 | 0.098 | 0.2216186 | 1.2 |
| TTC37     | 9.19E-06 | -0.108803697 | 0.13  | 0.174 | 0.2216294 | 1.2 |
| REL       | 9.35E-06 | -0.133709641 | 0.199 | 0.249 | 0.225574  | 1.2 |
| SPIN1     | 9.38E-06 | -0.127469134 | 0.152 | 0.197 | 0.2261511 | 1.2 |
| GJA1      | 9.48E-06 | 0.127127648  | 0.078 | 0.052 | 0.2285004 | 1.2 |
| CTNND1    | 9.80E-06 | 0.174941106  | 0.347 | 0.311 | 0.2362289 | 1.2 |
| DCLK2     | 9.88E-06 | -0.115324619 | 0.022 | 0.043 | 0.2382905 | 1.2 |
| OXSR1     | 1.01E-05 | 0.141580513  | 0.267 | 0.224 | 0.2430349 | 1.2 |
| FAM177B   | 1.02E-05 | 0.158825347  | 0.667 | 0.635 | 0.2450714 | 1.2 |
| CAPZA1    | 1.03E-05 | 0.182056979  | 0.471 | 0.439 | 0.2483828 | 1.2 |
| TCAF2     | 1.04E-05 | -0.112531723 | 0.104 | 0.143 | 0.2499509 | 1.2 |
| CLDND1    | 1.05E-05 | 0.183476929  | 0.245 | 0.206 | 0.2523367 | 1.2 |
| CTNNAL1   | 1.07E-05 | -0.100412793 | 0.079 | 0.115 | 0.2581704 | 1.2 |
| CAPRIN1   | 1.10E-05 | -0.11974567  | 0.196 | 0.246 | 0.2645465 | 1.2 |
| TIAM2     | 1.12E-05 | 0.222283113  | 0.272 | 0.236 | 0.2693424 | 1.2 |
| STRBP     | 1.12E-05 | -0.120383253 | 0.154 | 0.201 | 0.2698078 | 1.2 |
| YARS      | 1.14E-05 | 0.117747045  | 0.315 | 0.271 | 0.2739145 | 1.2 |
| DIP2A     | 1.15E-05 | 0.14163834   | 0.127 | 0.095 | 0.2771025 | 1.2 |
| RAB22A    | 1.16E-05 | 0.156744081  | 0.116 | 0.086 | 0.2796509 | 1.2 |
| LIPG      | 1.16E-05 | 0.117547163  | 0.046 | 0.027 | 0.280384  | 1.2 |
| HAT1      | 1.18E-05 | -0.105487667 | 0.133 | 0.176 | 0.2833754 | 1.2 |
| ACACA     | 1.21E-05 | -0.103245075 | 0.121 | 0.164 | 0.2913978 | 1.2 |
| 11-Sep    | 1.22E-05 | 0.158813355  | 0.145 | 0.112 | 0.2951133 | 1.2 |
| ZNF277    | 1.27E-05 | -0.106116991 | 0.174 | 0.221 | 0.3056971 | 1.2 |

|           |          |              |       |       |           |     |
|-----------|----------|--------------|-------|-------|-----------|-----|
| MECOM     | 1.27E-05 | -0.108913135 | 0.863 | 0.896 | 0.3062574 | 1.2 |
| SNHG12    | 1.27E-05 | 0.109375817  | 0.089 | 0.062 | 0.3067816 | 1.2 |
| RBMX      | 1.28E-05 | -0.106283329 | 0.204 | 0.257 | 0.309377  | 1.2 |
| DOPEY1    | 1.29E-05 | -0.102911514 | 0.095 | 0.133 | 0.3110539 | 1.2 |
| BCAR3     | 1.30E-05 | 0.185382594  | 0.116 | 0.086 | 0.3132971 | 1.2 |
| TJP1      | 1.35E-05 | 0.185764652  | 0.417 | 0.382 | 0.3262234 | 1.2 |
| ELP2      | 1.36E-05 | -0.114674283 | 0.134 | 0.177 | 0.3275095 | 1.2 |
| RBM8A     | 1.36E-05 | 0.18536813   | 0.529 | 0.506 | 0.3280268 | 1.2 |
| RP11-277P | 1.37E-05 | 0.180191562  | 0.092 | 0.065 | 0.3311099 | 1.2 |
| TACC1     | 1.38E-05 | -0.189040487 | 0.198 | 0.246 | 0.3316661 | 1.2 |
| NIN       | 1.39E-05 | -0.116126734 | 0.076 | 0.11  | 0.3358352 | 1.2 |
| TAF15     | 1.40E-05 | -0.108516786 | 0.272 | 0.331 | 0.3363807 | 1.2 |
| RARS      | 1.40E-05 | -0.112821044 | 0.243 | 0.299 | 0.3364323 | 1.2 |
| GPBP1     | 1.40E-05 | -0.186620858 | 0.571 | 0.63  | 0.3368478 | 1.2 |
| PCDH11X   | 1.43E-05 | 0.174134706  | 0.068 | 0.045 | 0.3452439 | 1.2 |
| CKAP4     | 1.43E-05 | -0.101495399 | 0.133 | 0.175 | 0.3454639 | 1.2 |
| YWHAG     | 1.55E-05 | 0.156568147  | 0.263 | 0.223 | 0.3725963 | 1.2 |
| C11orf1   | 1.55E-05 | -0.115597508 | 0.146 | 0.19  | 0.3727336 | 1.2 |
| STK39     | 1.57E-05 | -0.349550558 | 0.103 | 0.138 | 0.3775105 | 1.2 |
| FER       | 1.62E-05 | 0.187835073  | 0.243 | 0.206 | 0.3907467 | 1.2 |
| HELZ      | 1.66E-05 | -0.185350934 | 0.287 | 0.336 | 0.4000794 | 1.2 |
| CCDC146   | 1.69E-05 | 0.185820584  | 0.216 | 0.178 | 0.4078826 | 1.2 |
| SNX2      | 1.72E-05 | -0.1093205   | 0.16  | 0.206 | 0.4149769 | 1.2 |
| GAB2      | 1.73E-05 | 0.198216275  | 0.25  | 0.213 | 0.4177813 | 1.2 |
| PVRL2     | 1.74E-05 | 0.16334793   | 0.206 | 0.168 | 0.4191478 | 1.2 |
| PSMA4     | 1.74E-05 | -0.157971742 | 0.45  | 0.516 | 0.420319  | 1.2 |
| VOPP1     | 1.75E-05 | 0.109924902  | 0.087 | 0.06  | 0.4231467 | 1.2 |
| PRSS8     | 1.81E-05 | 0.129946059  | 0.081 | 0.056 | 0.4362292 | 1.2 |
| CLEC2D    | 1.84E-05 | -0.104833484 | 0.089 | 0.124 | 0.4435262 | 1.2 |
| SLC39A11  | 1.89E-05 | -0.134280987 | 0.054 | 0.083 | 0.454874  | 1.2 |
| LMO7      | 1.91E-05 | 0.129998548  | 0.099 | 0.071 | 0.4604526 | 1.2 |
| PHF20     | 1.92E-05 | 0.205715395  | 0.309 | 0.272 | 0.4623473 | 1.2 |
| NFX1      | 1.93E-05 | -0.114695801 | 0.131 | 0.173 | 0.4652549 | 1.2 |
| CHD9      | 1.93E-05 | 0.155198165  | 0.494 | 0.462 | 0.4665819 | 1.2 |
| CLSTN3    | 2.02E-05 | -0.107269565 | 0.035 | 0.06  | 0.4876415 | 1.2 |
| DPP10     | 2.04E-05 | -0.100441011 | 0.032 | 0.055 | 0.4926909 | 1.2 |
| EIF2S3    | 2.04E-05 | -0.11348617  | 0.345 | 0.409 | 0.4930708 | 1.2 |
| PROM1     | 2.05E-05 | -0.129482115 | 0.404 | 0.472 | 0.4937096 | 1.2 |
| EIF2S2    | 2.06E-05 | 0.26262699   | 0.298 | 0.267 | 0.4959997 | 1.2 |
| TNFRSF10C | 2.06E-05 | 0.106550946  | 0.065 | 0.042 | 0.4972528 | 1.2 |
| GALNT18   | 2.07E-05 | 0.120710099  | 0.07  | 0.047 | 0.4993658 | 1.2 |
| USP31     | 2.09E-05 | 0.1443347    | 0.157 | 0.122 | 0.5038599 | 1.2 |
| WDR19     | 2.22E-05 | -0.107772075 | 0.055 | 0.084 | 0.534335  | 1.2 |
| TBC1D1    | 2.27E-05 | 0.196389266  | 0.219 | 0.184 | 0.5469267 | 1.2 |
| CBFA2T2   | 2.32E-05 | -0.124854397 | 0.111 | 0.149 | 0.560576  | 1.2 |
| TNFRSF8   | 2.35E-05 | 0.103264415  | 0.161 | 0.126 | 0.5677484 | 1.2 |
| EIF4E2    | 2.35E-05 | -0.109208084 | 0.347 | 0.412 | 0.5678353 | 1.2 |

|           |          |              |       |       |           |     |
|-----------|----------|--------------|-------|-------|-----------|-----|
| MGST1     | 2.36E-05 | -0.114030249 | 0.876 | 0.886 | 0.5701689 | 1.2 |
| SERPINE2  | 2.37E-05 | -0.104763816 | 0.034 | 0.058 | 0.5717889 | 1.2 |
| NFIC      | 2.39E-05 | -0.103584328 | 0.139 | 0.183 | 0.576724  | 1.2 |
| RP11-273G | 2.43E-05 | 0.165250669  | 0.094 | 0.068 | 0.5852634 | 1.2 |
| IFIH1     | 2.44E-05 | -0.10085574  | 0.074 | 0.107 | 0.5874019 | 1.2 |
| MEGF11    | 2.46E-05 | 0.132620186  | 0.02  | 0.008 | 0.5921243 | 1.2 |
| PRDX1     | 2.56E-05 | 0.186306369  | 0.732 | 0.714 | 0.6161021 | 1.2 |
| LUZP1     | 2.56E-05 | 0.156740806  | 0.115 | 0.086 | 0.6182902 | 1.2 |
| NCEH1     | 2.62E-05 | -0.132497134 | 0.184 | 0.231 | 0.6321564 | 1.2 |
| FBXL20    | 2.64E-05 | -0.132151419 | 0.217 | 0.266 | 0.637191  | 1.2 |
| RBM3      | 2.73E-05 | -0.121203948 | 0.453 | 0.518 | 0.6573398 | 1.2 |
| ALG13     | 2.75E-05 | -0.108281107 | 0.076 | 0.108 | 0.6625382 | 1.2 |
| SLC25A26  | 2.76E-05 | -0.102104253 | 0.067 | 0.098 | 0.6649987 | 1.2 |
| LRRC4C    | 2.82E-05 | -0.109940015 | 0.038 | 0.063 | 0.6810394 | 1.2 |
| LINGO2    | 2.84E-05 | 0.141496515  | 0.087 | 0.061 | 0.6851889 | 1.2 |
| RP11-841O | 2.88E-05 | 0.109058076  | 0.09  | 0.064 | 0.6941059 | 1.2 |
| CUL3      | 2.92E-05 | -0.10353318  | 0.3   | 0.36  | 0.7034254 | 1.2 |
| LPIN1     | 3.01E-05 | 0.263709865  | 0.367 | 0.336 | 0.725961  | 1.2 |
| SUMO1     | 3.03E-05 | 0.184310138  | 0.543 | 0.529 | 0.7297487 | 1.2 |
| TTC39C    | 3.05E-05 | -0.104033775 | 0.104 | 0.143 | 0.734523  | 1.2 |
| RSL1D1    | 3.05E-05 | -0.136624161 | 0.582 | 0.644 | 0.7356024 | 1.2 |
| KAT6B     | 3.10E-05 | -0.118376253 | 0.104 | 0.141 | 0.7475549 | 1.2 |
| ACYP2     | 3.12E-05 | -0.12365662  | 0.188 | 0.235 | 0.7522792 | 1.2 |
| PPFIA1    | 3.25E-05 | 0.199799901  | 0.3   | 0.264 | 0.7828104 | 1.2 |
| PTPRJ     | 3.30E-05 | 0.128653186  | 0.357 | 0.312 | 0.7955184 | 1.2 |
| TMEM41B   | 3.32E-05 | -0.123740087 | 0.163 | 0.207 | 0.8006384 | 1.2 |
| CLOCK     | 3.37E-05 | 0.226978149  | 0.214 | 0.18  | 0.8118444 | 1.2 |
| SNX8      | 3.38E-05 | -0.112503316 | 0.056 | 0.084 | 0.8157462 | 1.2 |
| CCDC91    | 3.38E-05 | -0.109435113 | 0.311 | 0.368 | 0.8159528 | 1.2 |
| UBASH3B   | 3.39E-05 | 0.12065124   | 0.083 | 0.058 | 0.8177548 | 1.2 |
| LHFPL2    | 3.40E-05 | -0.278737539 | 0.366 | 0.41  | 0.8199084 | 1.2 |
| SYNPO2    | 3.41E-05 | -0.16964158  | 0.169 | 0.213 | 0.8212402 | 1.2 |
| LDHC      | 3.48E-05 | -0.109032765 | 0.013 | 0.03  | 0.8400578 | 1.2 |
| SPNS2     | 3.49E-05 | -0.101737822 | 0.047 | 0.073 | 0.8407421 | 1.2 |
| MIER1     | 3.53E-05 | -0.15015256  | 0.153 | 0.194 | 0.8511179 | 1.2 |
| PDP1      | 3.54E-05 | 0.152288398  | 0.11  | 0.082 | 0.8544306 | 1.2 |
| SHROOM3   | 3.56E-05 | -0.195235458 | 0.479 | 0.536 | 0.8577287 | 1.2 |
| LAMP2     | 3.65E-05 | 0.16823978   | 0.279 | 0.245 | 0.879003  | 1.2 |
| ERRFI1    | 3.70E-05 | -0.122805728 | 0.544 | 0.621 | 0.8913674 | 1.2 |
| MTR       | 3.79E-05 | -0.102684425 | 0.049 | 0.076 | 0.9137693 | 1.2 |
| ATP13A3   | 3.94E-05 | 0.181708696  | 0.372 | 0.335 | 0.9495047 | 1.2 |
| IST1      | 3.98E-05 | 0.185615594  | 0.314 | 0.281 | 0.9598527 | 1.2 |
| CENPW     | 4.00E-05 | 0.149786894  | 0.154 | 0.122 | 0.9635118 | 1.2 |
| SENP7     | 4.01E-05 | -0.116537583 | 0.095 | 0.129 | 0.9662476 | 1.2 |
| PLEKHH2   | 4.14E-05 | 0.123101272  | 0.155 | 0.122 | 0.9984827 | 1.2 |
| ZNF267    | 4.22E-05 | 0.143555356  | 0.205 | 0.169 | 1         | 1.2 |
| SPAG1     | 4.32E-05 | 0.203408281  | 0.18  | 0.146 | 1         | 1.2 |

|           |          |              |       |       |   |     |
|-----------|----------|--------------|-------|-------|---|-----|
| PCNP      | 4.32E-05 | 0.173804084  | 0.395 | 0.364 | 1 | 1.2 |
| GPR75-ASB | 4.42E-05 | 0.248451654  | 0.174 | 0.141 | 1 | 1.2 |
| RP11-431K | 4.54E-05 | -0.133563448 | 0.035 | 0.058 | 1 | 1.2 |
| SLC1A5    | 4.58E-05 | 0.10091214   | 0.063 | 0.042 | 1 | 1.2 |
| PELI2     | 4.65E-05 | -0.117824206 | 0.066 | 0.096 | 1 | 1.2 |
| GRPEL1    | 4.70E-05 | 0.109380177  | 0.08  | 0.056 | 1 | 1.2 |
| MAGI2     | 4.81E-05 | -0.142856896 | 0.072 | 0.103 | 1 | 1.2 |
| SGK223    | 4.81E-05 | -0.103553937 | 0.056 | 0.084 | 1 | 1.2 |
| TNFRSF10A | 4.86E-05 | 0.150124021  | 0.096 | 0.07  | 1 | 1.2 |
| IQGAP1    | 4.96E-05 | 0.15129918   | 0.461 | 0.426 | 1 | 1.2 |
| FARS2     | 4.97E-05 | -0.106353404 | 0.061 | 0.09  | 1 | 1.2 |
| OPHN1     | 5.10E-05 | 0.219174761  | 0.25  | 0.217 | 1 | 1.2 |
| ERN1      | 5.29E-05 | 0.154242188  | 0.167 | 0.135 | 1 | 1.2 |
| UHRF1BP1l | 5.42E-05 | -0.106319405 | 0.161 | 0.204 | 1 | 1.2 |
| OSBPL10   | 5.47E-05 | 0.140416307  | 0.16  | 0.127 | 1 | 1.2 |
| CDV3      | 5.63E-05 | 0.13555099   | 0.129 | 0.1   | 1 | 1.2 |
| NDRG2     | 5.66E-05 | 0.228607036  | 0.283 | 0.248 | 1 | 1.2 |
| C14orf2   | 5.81E-05 | -0.101068177 | 0.671 | 0.73  | 1 | 1.2 |
| ARHGAP12  | 5.95E-05 | 0.1763968    | 0.367 | 0.332 | 1 | 1.2 |
| MGLL      | 6.09E-05 | 0.120039688  | 0.086 | 0.061 | 1 | 1.2 |
| ACTN1     | 6.12E-05 | 0.106468004  | 0.309 | 0.266 | 1 | 1.2 |
| PTCHD1    | 6.20E-05 | 0.123423345  | 0.105 | 0.078 | 1 | 1.2 |
| PLCG2     | 6.52E-05 | -0.100393215 | 0.046 | 0.071 | 1 | 1.2 |
| CTSB      | 6.54E-05 | -0.119225702 | 0.266 | 0.314 | 1 | 1.2 |
| SCARB1    | 6.63E-05 | -0.105861891 | 0.033 | 0.054 | 1 | 1.2 |
| CA12      | 6.66E-05 | 0.206637865  | 0.262 | 0.224 | 1 | 1.2 |
| C5orf56   | 6.80E-05 | -0.136098488 | 0.099 | 0.132 | 1 | 1.2 |
| TGFA      | 6.82E-05 | 0.120736921  | 0.114 | 0.086 | 1 | 1.2 |
| CDKL5     | 7.46E-05 | 0.181044126  | 0.109 | 0.082 | 1 | 1.2 |
| ASNS      | 7.56E-05 | 0.118037175  | 0.103 | 0.076 | 1 | 1.2 |
| STK38L    | 7.71E-05 | 0.159174317  | 0.168 | 0.135 | 1 | 1.2 |
| ERGIC1    | 7.75E-05 | 0.152696203  | 0.118 | 0.09  | 1 | 1.2 |
| IRAK2     | 7.78E-05 | -0.113315025 | 0.113 | 0.15  | 1 | 1.2 |
| STK24     | 7.84E-05 | 0.137875933  | 0.168 | 0.136 | 1 | 1.2 |
| RNF114    | 7.93E-05 | 0.146325802  | 0.173 | 0.141 | 1 | 1.2 |
| RHOC      | 7.94E-05 | 0.153767345  | 0.072 | 0.05  | 1 | 1.2 |
| SUZ12     | 7.99E-05 | -0.11154728  | 0.152 | 0.192 | 1 | 1.2 |
| TCN1      | 7.99E-05 | -0.133896894 | 0.021 | 0.04  | 1 | 1.2 |
| SERPINB1  | 8.23E-05 | 0.156410351  | 0.127 | 0.099 | 1 | 1.2 |
| TCF12     | 8.28E-05 | -0.152648324 | 0.451 | 0.51  | 1 | 1.2 |
| RSBN1L    | 8.34E-05 | -0.142636739 | 0.097 | 0.13  | 1 | 1.2 |
| ELF3      | 8.44E-05 | -0.16682916  | 0.488 | 0.551 | 1 | 1.2 |
| OSBPL9    | 8.63E-05 | -0.316119027 | 0.426 | 0.473 | 1 | 1.2 |
| PMAIP1    | 8.77E-05 | 0.109885558  | 0.108 | 0.081 | 1 | 1.2 |
| LINC01420 | 8.96E-05 | 0.101370415  | 0.318 | 0.383 | 1 | 1.2 |
| STMN1     | 9.02E-05 | 0.194390958  | 0.219 | 0.188 | 1 | 1.2 |
| RFWD2     | 9.07E-05 | 0.162391975  | 0.318 | 0.287 | 1 | 1.2 |

|            |          |              |       |       |   |     |
|------------|----------|--------------|-------|-------|---|-----|
| GLRX       | 9.08E-05 | 0.439180391  | 0.503 | 0.497 | 1 | 1.2 |
| SLC39A10   | 9.14E-05 | 0.141061465  | 0.131 | 0.102 | 1 | 1.2 |
| NACA       | 9.19E-05 | -0.100300884 | 0.968 | 0.961 | 1 | 1.2 |
| BIRC2      | 9.23E-05 | 0.150534462  | 0.173 | 0.141 | 1 | 1.2 |
| OTUD7A     | 9.79E-05 | 0.109157162  | 0.085 | 0.061 | 1 | 1.2 |
| SLC41A2    | 0.000101 | 0.112253078  | 0.078 | 0.056 | 1 | 1.2 |
| STRN       | 0.000102 | -0.184977529 | 0.357 | 0.409 | 1 | 1.2 |
| PNISR      | 0.000102 | -0.113953361 | 0.737 | 0.773 | 1 | 1.2 |
| LAMTOR5    | 0.000104 | 0.142914508  | 0.623 | 0.607 | 1 | 1.2 |
| MT1E       | 0.000104 | -0.351269741 | 0.026 | 0.045 | 1 | 1.2 |
| TLE1       | 0.000105 | 0.179629753  | 0.254 | 0.22  | 1 | 1.2 |
| HNRNPA3    | 0.000105 | -0.111491209 | 0.299 | 0.353 | 1 | 1.2 |
| NEB        | 0.000106 | 0.101409879  | 0.043 | 0.027 | 1 | 1.2 |
| POLD3      | 0.000106 | -0.105090046 | 0.057 | 0.083 | 1 | 1.2 |
| DST        | 0.000109 | -0.137421168 | 0.548 | 0.607 | 1 | 1.2 |
| RHOQ       | 0.00011  | 0.157242342  | 0.325 | 0.291 | 1 | 1.2 |
| REPS1      | 0.000112 | -0.118506642 | 0.232 | 0.279 | 1 | 1.2 |
| DNTTIP1    | 0.000116 | 0.1125211    | 0.088 | 0.064 | 1 | 1.2 |
| RP1-313I6. | 0.000117 | 0.119013637  | 0.082 | 0.059 | 1 | 1.2 |
| HLA-B      | 0.000117 | 0.168499079  | 0.636 | 0.638 | 1 | 1.2 |
| AKIRIN1    | 0.000118 | 0.121166083  | 0.123 | 0.095 | 1 | 1.2 |
| RNF19A     | 0.000118 | 0.257087617  | 0.621 | 0.626 | 1 | 1.2 |
| ZNF791     | 0.00012  | 0.133986007  | 0.134 | 0.105 | 1 | 1.2 |
| CDC42BPA   | 0.00012  | 0.171002549  | 0.31  | 0.28  | 1 | 1.2 |
| EIF4EBP2   | 0.000121 | 0.159145477  | 0.14  | 0.112 | 1 | 1.2 |
| PCMT1      | 0.000129 | 0.144275775  | 0.13  | 0.103 | 1 | 1.2 |
| RIC3       | 0.000131 | 0.240582579  | 0.11  | 0.084 | 1 | 1.2 |
| LPIN2      | 0.000131 | 0.139848726  | 0.121 | 0.093 | 1 | 1.2 |
| SMIM14     | 0.000131 | -0.102748632 | 0.127 | 0.164 | 1 | 1.2 |
| BCCIP      | 0.000131 | 0.117530826  | 0.111 | 0.084 | 1 | 1.2 |
| EXT1       | 0.000132 | 0.242701008  | 0.571 | 0.56  | 1 | 1.2 |
| ZC3H11A    | 0.000134 | 0.151394794  | 0.269 | 0.233 | 1 | 1.2 |
| PLIN2      | 0.000136 | -0.103320628 | 0.125 | 0.161 | 1 | 1.2 |
| UBC        | 0.000147 | -0.601117359 | 0.949 | 0.95  | 1 | 1.2 |
| RNF19B     | 0.00015  | 0.205168819  | 0.196 | 0.165 | 1 | 1.2 |
| MEX3A      | 0.000151 | 0.104703867  | 0.075 | 0.053 | 1 | 1.2 |
| CCT5       | 0.000153 | 0.248084052  | 0.391 | 0.371 | 1 | 1.2 |
| SLCO3A1    | 0.000164 | 0.208340974  | 0.28  | 0.247 | 1 | 1.2 |
| AC008074.  | 0.000164 | 0.137743493  | 0.101 | 0.076 | 1 | 1.2 |
| PRKX       | 0.000164 | 0.170830645  | 0.2   | 0.169 | 1 | 1.2 |
| SCGB2A1    | 0.000165 | 0.296628633  | 0.059 | 0.04  | 1 | 1.2 |
| PRMT1      | 0.000165 | 0.154101459  | 0.044 | 0.027 | 1 | 1.2 |
| BAZ2B      | 0.000168 | -0.1008205   | 0.391 | 0.455 | 1 | 1.2 |
| ASAP2      | 0.000172 | 0.126901909  | 0.081 | 0.059 | 1 | 1.2 |
| CPD        | 0.000177 | -0.129222469 | 0.189 | 0.23  | 1 | 1.2 |
| NUFIP2     | 0.000188 | 0.167247367  | 0.236 | 0.205 | 1 | 1.2 |
| GABARAP    | 0.000189 | 0.162880798  | 0.33  | 0.297 | 1 | 1.2 |

|           |          |              |       |       |   |     |
|-----------|----------|--------------|-------|-------|---|-----|
| RP11-530C | 0.000189 | 0.105296753  | 0.057 | 0.038 | 1 | 1.2 |
| ARPC5     | 0.000189 | 0.135931331  | 0.123 | 0.097 | 1 | 1.2 |
| HNRNPU    | 0.000191 | -0.119377551 | 0.08  | 0.109 | 1 | 1.2 |
| SRRM2     | 0.000192 | -0.10410475  | 0.168 | 0.209 | 1 | 1.2 |
| NARS      | 0.000193 | 0.208819452  | 0.31  | 0.284 | 1 | 1.2 |
| MPP5      | 0.000198 | 0.13647034   | 0.269 | 0.235 | 1 | 1.2 |
| AC026202. | 0.000202 | -0.12724148  | 0.166 | 0.205 | 1 | 1.2 |
| SETD5     | 0.000204 | -0.13195336  | 0.472 | 0.532 | 1 | 1.2 |
| ARFGAP3   | 0.000206 | 0.149633382  | 0.206 | 0.175 | 1 | 1.2 |
| SMYD2     | 0.000206 | 0.128915126  | 0.069 | 0.049 | 1 | 1.2 |
| CXCL2     | 0.000213 | -0.161249489 | 0.223 | 0.268 | 1 | 1.2 |
| TMSB10    | 0.000221 | 0.372783036  | 0.619 | 0.63  | 1 | 1.2 |
| MAPKBP1   | 0.000221 | 0.13512438   | 0.117 | 0.091 | 1 | 1.2 |
| YWHAQ     | 0.000228 | 0.12487685   | 0.4   | 0.368 | 1 | 1.2 |
| PSMD12    | 0.000233 | 0.145631312  | 0.145 | 0.116 | 1 | 1.2 |
| FSTL1     | 0.000234 | 0.123190545  | 0.136 | 0.109 | 1 | 1.2 |
| SOS2      | 0.000235 | 0.183340022  | 0.483 | 0.465 | 1 | 1.2 |
| SERINC1   | 0.00024  | 0.177103274  | 0.329 | 0.301 | 1 | 1.2 |
| EIF4B     | 0.00024  | -0.100826057 | 0.436 | 0.5   | 1 | 1.2 |
| PIN4      | 0.000243 | -0.1001041   | 0.255 | 0.302 | 1 | 1.2 |
| SLC38A2   | 0.00025  | 0.159429725  | 0.2   | 0.169 | 1 | 1.2 |
| FRMD5     | 0.000252 | 0.243891528  | 0.192 | 0.163 | 1 | 1.2 |
| PTMA      | 0.000255 | -0.156660237 | 0.544 | 0.599 | 1 | 1.2 |
| MAD1L1    | 0.000259 | 0.113384758  | 0.076 | 0.055 | 1 | 1.2 |
| IGF1R     | 0.000267 | -0.114485637 | 0.372 | 0.426 | 1 | 1.2 |
| NLRC5     | 0.000274 | 0.104205346  | 0.052 | 0.035 | 1 | 1.2 |
| FHL2      | 0.000275 | 0.110306001  | 0.1   | 0.076 | 1 | 1.2 |
| MAPRE1    | 0.000282 | 0.132211557  | 0.182 | 0.151 | 1 | 1.2 |
| FOXK2     | 0.000285 | -0.107205815 | 0.264 | 0.312 | 1 | 1.2 |
| UBR2      | 0.000287 | -0.124964114 | 0.278 | 0.328 | 1 | 1.2 |
| GGACT     | 0.000297 | 0.155061379  | 0.193 | 0.163 | 1 | 1.2 |
| LCN2      | 0.000306 | -0.120127071 | 0.023 | 0.04  | 1 | 1.2 |
| ACSS1     | 0.000306 | -0.124100636 | 0.007 | 0.019 | 1 | 1.2 |
| TMED9     | 0.000314 | 0.103745878  | 0.093 | 0.07  | 1 | 1.2 |
| PCBP1     | 0.000315 | -0.124453806 | 0.435 | 0.491 | 1 | 1.2 |
| HSP90AA1  | 0.000318 | 0.226961462  | 0.914 | 0.917 | 1 | 1.2 |
| ENY2      | 0.00032  | 0.232824459  | 0.432 | 0.418 | 1 | 1.2 |
| ASH1L     | 0.000328 | -0.10717425  | 0.455 | 0.511 | 1 | 1.2 |
| RP11-795H | 0.000341 | 0.163641391  | 0.458 | 0.436 | 1 | 1.2 |
| ALPL      | 0.000343 | 0.14515174   | 0.075 | 0.054 | 1 | 1.2 |
| HIF1A     | 0.000344 | -0.160052356 | 0.354 | 0.403 | 1 | 1.2 |
| NCOA3     | 0.000351 | 0.165593833  | 0.313 | 0.282 | 1 | 1.2 |
| BSDC1     | 0.000357 | 0.155398751  | 0.201 | 0.173 | 1 | 1.2 |
| POLE2     | 0.000362 | 0.172428486  | 0.238 | 0.208 | 1 | 1.2 |
| ROBO2     | 0.000364 | 0.100087947  | 0.07  | 0.05  | 1 | 1.2 |
| PKP4      | 0.000366 | -0.107806987 | 0.395 | 0.451 | 1 | 1.2 |
| RNF24     | 0.000369 | -0.102234624 | 0.379 | 0.432 | 1 | 1.2 |

|            |          |              |       |       |   |     |
|------------|----------|--------------|-------|-------|---|-----|
| HIF1A-AS2  | 0.000372 | 0.27810962   | 0.165 | 0.138 | 1 | 1.2 |
| ARF6       | 0.000377 | 0.123033302  | 0.213 | 0.182 | 1 | 1.2 |
| SPATS2L    | 0.000378 | 0.173438317  | 0.302 | 0.27  | 1 | 1.2 |
| GNA12      | 0.000378 | 0.160003138  | 0.379 | 0.352 | 1 | 1.2 |
| RAB5A      | 0.00038  | 0.123502649  | 0.246 | 0.214 | 1 | 1.2 |
| UBR4       | 0.000413 | 0.156820557  | 0.215 | 0.184 | 1 | 1.2 |
| IPO5       | 0.000425 | 0.14032658   | 0.182 | 0.152 | 1 | 1.2 |
| TOR1AIP1   | 0.000436 | 0.1475544    | 0.109 | 0.085 | 1 | 1.2 |
| SEC62      | 0.000436 | 0.133887342  | 0.624 | 0.626 | 1 | 1.2 |
| FBXO28     | 0.000439 | 0.16358345   | 0.225 | 0.195 | 1 | 1.2 |
| BLVRA      | 0.000444 | 0.1166073    | 0.108 | 0.084 | 1 | 1.2 |
| ANKRD11    | 0.000453 | 0.234111909  | 0.313 | 0.287 | 1 | 1.2 |
| PTBP3      | 0.000457 | 0.146061264  | 0.377 | 0.35  | 1 | 1.2 |
| NDUFS4     | 0.000459 | -0.105976515 | 0.415 | 0.475 | 1 | 1.2 |
| HSD17B6    | 0.000459 | 0.214544688  | 0.048 | 0.032 | 1 | 1.2 |
| SGK1       | 0.00047  | 0.172436778  | 0.201 | 0.171 | 1 | 1.2 |
| YWHAE      | 0.000481 | 0.100536584  | 0.635 | 0.614 | 1 | 1.2 |
| FGD6       | 0.000503 | 0.202069693  | 0.274 | 0.247 | 1 | 1.2 |
| SCD5       | 0.000503 | 0.114026404  | 0.078 | 0.058 | 1 | 1.2 |
| SGMS1      | 0.000504 | 0.206719655  | 0.296 | 0.268 | 1 | 1.2 |
| NEK1       | 0.00051  | -0.11040201  | 0.067 | 0.092 | 1 | 1.2 |
| TANC1      | 0.000519 | -0.111346889 | 0.224 | 0.268 | 1 | 1.2 |
| C8orf37-AS | 0.000527 | 0.15238112   | 0.293 | 0.262 | 1 | 1.2 |
| RAB3GAP1   | 0.000533 | 0.127058624  | 0.323 | 0.291 | 1 | 1.2 |
| HNRNPK     | 0.000552 | 0.176075072  | 0.481 | 0.471 | 1 | 1.2 |
| SRSF11     | 0.000557 | 0.13350824   | 0.492 | 0.475 | 1 | 1.2 |
| PFDN2      | 0.000589 | 0.151450036  | 0.095 | 0.073 | 1 | 1.2 |
| STX7       | 0.000593 | 0.144033483  | 0.182 | 0.153 | 1 | 1.2 |
| NDUFA1     | 0.000602 | 0.149034301  | 0.567 | 0.559 | 1 | 1.2 |
| PPP2R3A    | 0.000611 | -0.114970042 | 0.373 | 0.42  | 1 | 1.2 |
| ZFAND5     | 0.000612 | -0.109397708 | 0.306 | 0.354 | 1 | 1.2 |
| SRPK2      | 0.000616 | 0.142962339  | 0.4   | 0.372 | 1 | 1.2 |
| CPNE4      | 0.000617 | 0.11280253   | 0.059 | 0.041 | 1 | 1.2 |
| RP11-66B2  | 0.000628 | 0.112518788  | 0.1   | 0.078 | 1 | 1.2 |
| PRPSAP1    | 0.000634 | 0.127501573  | 0.138 | 0.112 | 1 | 1.2 |
| CKS2       | 0.000634 | 0.152171933  | 0.164 | 0.137 | 1 | 1.2 |
| NUP88      | 0.000661 | 0.136257346  | 0.217 | 0.187 | 1 | 1.2 |
| RP11-417F  | 0.000666 | 0.126861691  | 0.136 | 0.111 | 1 | 1.2 |
| FBXW11     | 0.000673 | 0.160052375  | 0.343 | 0.318 | 1 | 1.2 |
| ARIH2      | 0.000682 | 0.140888008  | 0.148 | 0.121 | 1 | 1.2 |
| PGM3       | 0.000699 | 0.136626862  | 0.13  | 0.106 | 1 | 1.2 |
| ESYT2      | 0.000699 | 0.102615389  | 0.527 | 0.507 | 1 | 1.2 |
| EFTUD1     | 0.000719 | 0.178017848  | 0.122 | 0.099 | 1 | 1.2 |
| LGALS3     | 0.000721 | 0.240440161  | 0.203 | 0.176 | 1 | 1.2 |
| GLRX3      | 0.000726 | 0.126612495  | 0.118 | 0.094 | 1 | 1.2 |
| LIMS1      | 0.000735 | 0.101661917  | 0.342 | 0.309 | 1 | 1.2 |
| GPR87      | 0.000738 | 0.109949358  | 0.071 | 0.052 | 1 | 1.2 |

|            |          |              |       |       |   |     |
|------------|----------|--------------|-------|-------|---|-----|
| MEAF6      | 0.000747 | -0.109883337 | 0.123 | 0.154 | 1 | 1.2 |
| IQCJ-SCHIP | 0.000749 | 0.120943059  | 0.093 | 0.071 | 1 | 1.2 |
| TUBB       | 0.00075  | 0.15031325   | 0.369 | 0.344 | 1 | 1.2 |
| HERC3      | 0.000754 | -0.136328178 | 0.131 | 0.162 | 1 | 1.2 |
| DNER       | 0.000757 | -0.116134072 | 0.055 | 0.077 | 1 | 1.2 |
| NET1       | 0.000796 | -0.130097503 | 0.165 | 0.197 | 1 | 1.2 |
| ADRBK2     | 0.000813 | 0.128615279  | 0.124 | 0.1   | 1 | 1.2 |
| RAB3IP     | 0.000828 | 0.120039968  | 0.138 | 0.114 | 1 | 1.2 |
| CXCL3      | 0.000859 | -0.138103802 | 0.072 | 0.097 | 1 | 1.2 |
| PLSCR1     | 0.000875 | 0.159664382  | 0.31  | 0.285 | 1 | 1.2 |
| CEBPZ      | 0.000878 | 0.167707922  | 0.196 | 0.171 | 1 | 1.2 |
| SAR1B      | 0.000937 | 0.133742084  | 0.478 | 0.449 | 1 | 1.2 |
| GSPT1      | 0.000942 | 0.142316086  | 0.238 | 0.21  | 1 | 1.2 |
| SOS1       | 0.000954 | -0.137197753 | 0.349 | 0.392 | 1 | 1.2 |
| SMURF2     | 0.000954 | 0.145849631  | 0.383 | 0.36  | 1 | 1.2 |
| UBAP1      | 0.00098  | -0.113711244 | 0.302 | 0.346 | 1 | 1.2 |
| GRIK1      | 0.000984 | 0.11944263   | 0.068 | 0.05  | 1 | 1.2 |
| TMEM2      | 0.000991 | 0.122111817  | 0.189 | 0.159 | 1 | 1.2 |
| L3MBTL1    | 0.001009 | 0.10100685   | 0.05  | 0.035 | 1 | 1.2 |
| UCHL3      | 0.001081 | 0.134982983  | 0.161 | 0.135 | 1 | 1.2 |
| CXCL16     | 0.001101 | 0.134455693  | 0.221 | 0.193 | 1 | 1.2 |
| RP11-452H  | 0.001126 | 0.108389557  | 0.105 | 0.082 | 1 | 1.2 |
| RGS6       | 0.001132 | 0.210547807  | 0.165 | 0.14  | 1 | 1.2 |
| CD9        | 0.001179 | 0.171474815  | 0.273 | 0.25  | 1 | 1.2 |
| TMEM181    | 0.001188 | 0.171466259  | 0.262 | 0.236 | 1 | 1.2 |
| TMBIM1     | 0.001198 | 0.12143816   | 0.155 | 0.13  | 1 | 1.2 |
| TRA2B      | 0.001209 | -0.103369885 | 0.171 | 0.206 | 1 | 1.2 |
| EIF4A1     | 0.001215 | 0.154446578  | 0.595 | 0.582 | 1 | 1.2 |
| VAT1       | 0.001231 | 0.129751058  | 0.139 | 0.116 | 1 | 1.2 |
| ZNF431     | 0.001266 | 0.141424666  | 0.154 | 0.129 | 1 | 1.2 |
| CDK6       | 0.001277 | 0.151840799  | 0.251 | 0.223 | 1 | 1.2 |
| KLF5       | 0.001354 | 0.117886075  | 0.251 | 0.222 | 1 | 1.2 |
| RPS27L     | 0.001362 | 0.241673583  | 0.528 | 0.53  | 1 | 1.2 |
| CTIF       | 0.001365 | 0.106151043  | 0.087 | 0.067 | 1 | 1.2 |
| SARS       | 0.001401 | 0.145380908  | 0.226 | 0.198 | 1 | 1.2 |
| SLC6A14    | 0.001407 | 0.170098361  | 0.235 | 0.206 | 1 | 1.2 |
| DDIT4      | 0.00143  | -0.129433902 | 0.184 | 0.219 | 1 | 1.2 |
| TOR1AIP2   | 0.001528 | 0.14797757   | 0.259 | 0.234 | 1 | 1.2 |
| ABHD3      | 0.001528 | 0.159568121  | 0.163 | 0.138 | 1 | 1.2 |
| HN1        | 0.001532 | 0.106663191  | 0.067 | 0.049 | 1 | 1.2 |
| CD58       | 0.001596 | 0.144940003  | 0.105 | 0.085 | 1 | 1.2 |
| UBE2D3     | 0.001597 | 0.154625588  | 0.567 | 0.561 | 1 | 1.2 |
| KCNQ1OT1   | 0.001645 | 0.109693533  | 0.117 | 0.094 | 1 | 1.2 |
| DCAF6      | 0.00171  | 0.143264545  | 0.469 | 0.452 | 1 | 1.2 |
| MAPK1      | 0.001722 | 0.124960748  | 0.173 | 0.147 | 1 | 1.2 |
| NUP153     | 0.001726 | -0.156566239 | 0.244 | 0.278 | 1 | 1.2 |
| STK17A     | 0.001759 | 0.106657973  | 0.087 | 0.067 | 1 | 1.2 |



|           |          |              |       |       |   |     |
|-----------|----------|--------------|-------|-------|---|-----|
| POLR2K    | 0.001762 | 0.164470131  | 0.347 | 0.329 | 1 | 1.2 |
| RPS15     | 0.001764 | -0.144987179 | 0.146 | 0.178 | 1 | 1.2 |
| COX7B     | 0.001819 | 0.126084875  | 0.656 | 0.657 | 1 | 1.2 |
| HNRNP2    | 0.001831 | 0.138024709  | 0.246 | 0.22  | 1 | 1.2 |
| TXN       | 0.00189  | 0.213364538  | 0.7   | 0.709 | 1 | 1.2 |
| CLTC      | 0.001918 | 0.146736514  | 0.224 | 0.2   | 1 | 1.2 |
| TAGLN     | 0.001994 | 0.324033861  | 0.035 | 0.022 | 1 | 1.2 |
| CHCHD2    | 0.002049 | 0.169026145  | 0.254 | 0.228 | 1 | 1.2 |
| PHACTR4   | 0.002076 | 0.138473917  | 0.41  | 0.391 | 1 | 1.2 |
| GAN       | 0.002096 | 0.132228557  | 0.159 | 0.136 | 1 | 1.2 |
| CDYL      | 0.002115 | 0.160432764  | 0.247 | 0.222 | 1 | 1.2 |
| DENND4A   | 0.002177 | 0.178323822  | 0.528 | 0.519 | 1 | 1.2 |
| FAM219A   | 0.002241 | 0.127212875  | 0.099 | 0.079 | 1 | 1.2 |
| AIM1      | 0.002285 | -0.111673413 | 0.283 | 0.323 | 1 | 1.2 |
| PXN       | 0.002306 | 0.104456918  | 0.105 | 0.085 | 1 | 1.2 |
| SPAG9     | 0.002369 | 0.106143523  | 0.359 | 0.333 | 1 | 1.2 |
| RAB18     | 0.002382 | 0.139729558  | 0.307 | 0.28  | 1 | 1.2 |
| FABP6     | 0.002399 | -0.132298795 | 0.034 | 0.05  | 1 | 1.2 |
| UBE2L3    | 0.00251  | 0.140415693  | 0.463 | 0.452 | 1 | 1.2 |
| MFAP1     | 0.002596 | 0.134718377  | 0.177 | 0.153 | 1 | 1.2 |
| BCL2L1    | 0.002616 | 0.149560139  | 0.112 | 0.092 | 1 | 1.2 |
| GATAD2B   | 0.002685 | 0.111844791  | 0.249 | 0.224 | 1 | 1.2 |
| SESTD1    | 0.002713 | 0.105915072  | 0.619 | 0.625 | 1 | 1.2 |
| RNF38     | 0.002824 | 0.137585525  | 0.243 | 0.219 | 1 | 1.2 |
| TEC       | 0.002827 | 0.125965146  | 0.075 | 0.058 | 1 | 1.2 |
| UGCG      | 0.0029   | -0.151751421 | 0.3   | 0.337 | 1 | 1.2 |
| CDKL1     | 0.002909 | 0.113732969  | 0.071 | 0.054 | 1 | 1.2 |
| VEZT      | 0.002914 | 0.146647434  | 0.356 | 0.334 | 1 | 1.2 |
| SLC36A4   | 0.002937 | 0.104996303  | 0.084 | 0.066 | 1 | 1.2 |
| EYS       | 0.003053 | 0.102749968  | 0.084 | 0.066 | 1 | 1.2 |
| RPL9      | 0.003056 | 0.13035009   | 0.666 | 0.673 | 1 | 1.2 |
| ATP8B1    | 0.003082 | -0.168251499 | 0.304 | 0.339 | 1 | 1.2 |
| LAPTM4A   | 0.003147 | 0.151125478  | 0.256 | 0.233 | 1 | 1.2 |
| RND3      | 0.003159 | 0.120679865  | 0.322 | 0.295 | 1 | 1.2 |
| HSPA1A    | 0.003174 | 0.11637874   | 0.063 | 0.047 | 1 | 1.2 |
| BIRC6-AS2 | 0.003185 | 0.16289346   | 0.25  | 0.226 | 1 | 1.2 |
| EIF1AX    | 0.003217 | 0.12527578   | 0.257 | 0.232 | 1 | 1.2 |
| TNFRSF10B | 0.003219 | -0.101061702 | 0.172 | 0.204 | 1 | 1.2 |
| MKL1      | 0.003298 | -0.235217718 | 0.46  | 0.496 | 1 | 1.2 |
| ETS2      | 0.003394 | 0.1101291    | 0.143 | 0.121 | 1 | 1.2 |
| WFDC2     | 0.003436 | 0.102906439  | 0.513 | 0.496 | 1 | 1.2 |
| PCSK5     | 0.003466 | 0.121971526  | 0.062 | 0.046 | 1 | 1.2 |
| NUB1      | 0.003541 | -0.122808364 | 0.261 | 0.301 | 1 | 1.2 |
| GFPT1     | 0.003608 | 0.150363542  | 0.226 | 0.203 | 1 | 1.2 |
| TNFAIP6   | 0.003616 | 0.187160267  | 0.377 | 0.43  | 1 | 1.2 |
| GRB14     | 0.003751 | 0.163479019  | 0.564 | 0.562 | 1 | 1.2 |
| MARK3     | 0.003762 | 0.125406688  | 0.446 | 0.429 | 1 | 1.2 |

|           |          |              |       |       |   |     |
|-----------|----------|--------------|-------|-------|---|-----|
| OFD1      | 0.003924 | 0.180688636  | 0.319 | 0.301 | 1 | 1.2 |
| OGDH      | 0.003951 | 0.14598799   | 0.125 | 0.104 | 1 | 1.2 |
| RAB12     | 0.004069 | 0.109411814  | 0.217 | 0.192 | 1 | 1.2 |
| NUTM2B-A  | 0.004107 | 0.166375411  | 0.315 | 0.293 | 1 | 1.2 |
| FBXW7     | 0.004149 | -0.107982783 | 0.291 | 0.331 | 1 | 1.2 |
| DCUN1D4   | 0.004287 | 0.12931183   | 0.193 | 0.17  | 1 | 1.2 |
| STARD13   | 0.004413 | 0.220030649  | 0.219 | 0.198 | 1 | 1.2 |
| NCAM1     | 0.004416 | 0.101789723  | 0.049 | 0.035 | 1 | 1.2 |
| ARL4C     | 0.004464 | 0.112753536  | 0.237 | 0.211 | 1 | 1.2 |
| RANBP17   | 0.004487 | 0.186238527  | 0.194 | 0.17  | 1 | 1.2 |
| BRD2      | 0.004707 | 0.14159862   | 0.241 | 0.219 | 1 | 1.2 |
| CCT2      | 0.004732 | 0.174574684  | 0.415 | 0.405 | 1 | 1.2 |
| CSTB      | 0.004773 | -0.141621927 | 0.166 | 0.194 | 1 | 1.2 |
| MAP3K8    | 0.004822 | 0.1050114    | 0.301 | 0.275 | 1 | 1.2 |
| ALDOA     | 0.004825 | 0.349217553  | 0.136 | 0.116 | 1 | 1.2 |
| ACTG2     | 0.004897 | 0.118243473  | 0.023 | 0.014 | 1 | 1.2 |
| UBE3C     | 0.00502  | 0.135568104  | 0.289 | 0.27  | 1 | 1.2 |
| UBXN2A    | 0.005095 | -0.121699826 | 0.069 | 0.089 | 1 | 1.2 |
| TMPRSS2   | 0.005237 | 0.138919138  | 0.152 | 0.131 | 1 | 1.2 |
| PPARG     | 0.005357 | 0.103431002  | 0.073 | 0.057 | 1 | 1.2 |
| UBA6      | 0.005414 | 0.117671514  | 0.351 | 0.331 | 1 | 1.2 |
| TRAPPC3   | 0.005505 | 0.113010479  | 0.087 | 0.07  | 1 | 1.2 |
| IFNAR2    | 0.005515 | 0.169483178  | 0.315 | 0.299 | 1 | 1.2 |
| SNX24     | 0.005749 | 0.11419784   | 0.224 | 0.202 | 1 | 1.2 |
| PUM2      | 0.005793 | -0.111091657 | 0.327 | 0.364 | 1 | 1.2 |
| SEC31A    | 0.005795 | 0.143401864  | 0.462 | 0.45  | 1 | 1.2 |
| GPR160    | 0.005872 | 0.102442263  | 0.07  | 0.054 | 1 | 1.2 |
| CTC-444N2 | 0.005984 | 0.12449991   | 0.097 | 0.079 | 1 | 1.2 |
| TUFT1     | 0.00601  | -0.108453638 | 0.131 | 0.155 | 1 | 1.2 |
| TRNAU1AP  | 0.006056 | 0.12729934   | 0.289 | 0.269 | 1 | 1.2 |
| TM2D1     | 0.006078 | 0.102686369  | 0.109 | 0.09  | 1 | 1.2 |
| LAMTOR3   | 0.006122 | 0.100659053  | 0.158 | 0.136 | 1 | 1.2 |
| FYTTD1    | 0.006203 | 0.115057341  | 0.13  | 0.11  | 1 | 1.2 |
| RAPGEF4   | 0.006373 | 0.100639755  | 0.112 | 0.093 | 1 | 1.2 |
| CSDE1     | 0.00639  | 0.136429681  | 0.579 | 0.586 | 1 | 1.2 |
| S100A16   | 0.006441 | 0.206326877  | 0.116 | 0.096 | 1 | 1.2 |
| KPNA2     | 0.006642 | 0.126501259  | 0.185 | 0.164 | 1 | 1.2 |
| MAGT1     | 0.006878 | 0.12839475   | 0.196 | 0.174 | 1 | 1.2 |
| WDR43     | 0.006941 | 0.10532552   | 0.126 | 0.106 | 1 | 1.2 |
| TMEM65    | 0.007026 | 0.106168917  | 0.197 | 0.175 | 1 | 1.2 |
| PRRG4     | 0.00705  | 0.146197323  | 0.215 | 0.195 | 1 | 1.2 |
| TMED2     | 0.007107 | 0.119897457  | 0.172 | 0.15  | 1 | 1.2 |
| EXT2      | 0.007113 | 0.107497796  | 0.15  | 0.128 | 1 | 1.2 |
| TMEM159   | 0.007206 | 0.144928395  | 0.432 | 0.428 | 1 | 1.2 |
| ABL2      | 0.007303 | 0.135398099  | 0.219 | 0.2   | 1 | 1.2 |
| YPEL5     | 0.007352 | 0.117029081  | 0.395 | 0.379 | 1 | 1.2 |
| STK40     | 0.00777  | 0.10261378   | 0.146 | 0.126 | 1 | 1.2 |

|          |          |              |       |       |   |     |
|----------|----------|--------------|-------|-------|---|-----|
| GOLGA4   | 0.007837 | -0.110728254 | 0.607 | 0.662 | 1 | 1.2 |
| ALCAM    | 0.00796  | 0.142903983  | 0.197 | 0.174 | 1 | 1.2 |
| CCDC93   | 0.007993 | 0.102896699  | 0.135 | 0.115 | 1 | 1.2 |
| ASPH     | 0.007995 | 0.133981207  | 0.13  | 0.112 | 1 | 1.2 |
| LMBR1    | 0.008031 | 0.107145934  | 0.137 | 0.117 | 1 | 1.2 |
| IFFO2    | 0.008353 | 0.10512592   | 0.159 | 0.137 | 1 | 1.2 |
| MAP1LC3B | 0.008387 | 0.122710793  | 0.123 | 0.104 | 1 | 1.2 |
| PPP2CB   | 0.008464 | -0.134290169 | 0.285 | 0.315 | 1 | 1.2 |
| GTF2B    | 0.008476 | 0.143856849  | 0.236 | 0.218 | 1 | 1.2 |
| MRPS6    | 0.008796 | 0.177574838  | 0.209 | 0.186 | 1 | 1.2 |
| GPATCH2L | 0.008981 | 0.115547382  | 0.138 | 0.118 | 1 | 1.2 |
| UBE2K    | 0.009006 | 0.10452501   | 0.343 | 0.322 | 1 | 1.2 |
| MAX      | 0.009103 | 0.111353369  | 0.197 | 0.176 | 1 | 1.2 |
| AMOTL1   | 0.009164 | 0.124329568  | 0.1   | 0.083 | 1 | 1.2 |
| TAOK1    | 0.009261 | 0.128768389  | 0.268 | 0.251 | 1 | 1.2 |
| MFN1     | 0.00932  | 0.103730359  | 0.168 | 0.147 | 1 | 1.2 |
| NR2C2    | 0.009416 | 0.113126724  | 0.154 | 0.133 | 1 | 1.2 |
| CEACAM1  | 0.009448 | 0.163225794  | 0.131 | 0.113 | 1 | 1.2 |
| SRSF5    | 0.009494 | 0.101481838  | 0.335 | 0.316 | 1 | 1.2 |
| SRP54    | 0.009801 | 0.138060352  | 0.29  | 0.273 | 1 | 1.2 |
| FLNB     | 0.009859 | -0.145409387 | 0.358 | 0.385 | 1 | 1.2 |
| PIK3CA   | 0.009902 | 0.108626236  | 0.239 | 0.218 | 1 | 1.2 |
| PDIA6    | 0.009956 | -0.164095972 | 0.226 | 0.251 | 1 | 1.2 |
| SLIRP    | 0.009981 | 0.172002249  | 0.348 | 0.333 | 1 | 1.2 |
| ANXA6    | 0.010333 | 0.112400331  | 0.095 | 0.079 | 1 | 1.2 |
| GATAD2A  | 0.010516 | 0.100501541  | 0.118 | 0.099 | 1 | 1.2 |
| COCH     | 0.01069  | 0.121019033  | 0.117 | 0.1   | 1 | 1.2 |
| SNRPB    | 0.011182 | 0.118319685  | 0.094 | 0.078 | 1 | 1.2 |
| UAP1     | 0.011437 | 0.152286833  | 0.257 | 0.237 | 1 | 1.2 |
| KIF1B    | 0.011438 | 0.208014248  | 0.484 | 0.481 | 1 | 1.2 |
| XRR1A    | 0.011513 | 0.118092833  | 0.125 | 0.108 | 1 | 1.2 |
| CBR4     | 0.012084 | 0.133374451  | 0.28  | 0.262 | 1 | 1.2 |
| TUBA1B   | 0.01258  | 0.108316766  | 0.289 | 0.267 | 1 | 1.2 |
| KIAA0232 | 0.014239 | 0.104754461  | 0.151 | 0.133 | 1 | 1.2 |
| IWS1     | 0.014301 | 0.106422321  | 0.164 | 0.146 | 1 | 1.2 |
| TFG      | 0.015049 | -0.104390868 | 0.288 | 0.318 | 1 | 1.2 |
| RBM25    | 0.015051 | 0.122095043  | 0.338 | 0.323 | 1 | 1.2 |
| GADD45A  | 0.015399 | -0.173668304 | 0.213 | 0.238 | 1 | 1.2 |
| UXS1     | 0.015494 | 0.125271298  | 0.11  | 0.094 | 1 | 1.2 |
| SEC11A   | 0.01562  | 0.108985531  | 0.532 | 0.534 | 1 | 1.2 |
| ANKIB1   | 0.01608  | 0.125674087  | 0.33  | 0.315 | 1 | 1.2 |
| NF1      | 0.017263 | 0.116235737  | 0.465 | 0.455 | 1 | 1.2 |
| GLO1     | 0.017333 | 0.109717844  | 0.117 | 0.101 | 1 | 1.2 |
| PTPN14   | 0.018942 | -0.185384178 | 0.428 | 0.465 | 1 | 1.2 |
| KCMF1    | 0.019199 | -0.128077508 | 0.28  | 0.309 | 1 | 1.2 |
| FAM46A   | 0.019767 | 0.134939372  | 0.123 | 0.107 | 1 | 1.2 |
| SIAH2    | 0.020482 | 0.190172686  | 0.069 | 0.056 | 1 | 1.2 |

|           |          |              |       |       |   |     |
|-----------|----------|--------------|-------|-------|---|-----|
| PPP1R14C  | 0.020482 | 0.1139345    | 0.208 | 0.191 | 1 | 1.2 |
| AC074391. | 0.020515 | -0.1141376   | 0.045 | 0.058 | 1 | 1.2 |
| EIF5A     | 0.020713 | 0.101035335  | 0.072 | 0.059 | 1 | 1.2 |
| GTF2I     | 0.021276 | 0.138327266  | 0.441 | 0.433 | 1 | 1.2 |
| NAA15     | 0.021334 | 0.10028143   | 0.16  | 0.142 | 1 | 1.2 |
| PMM2      | 0.02137  | 0.11177077   | 0.105 | 0.089 | 1 | 1.2 |
| SRFBP1    | 0.021938 | 0.119021554  | 0.21  | 0.193 | 1 | 1.2 |
| DDX24     | 0.022248 | 0.117624335  | 0.612 | 0.63  | 1 | 1.2 |
| EPS15     | 0.022307 | 0.10886738   | 0.252 | 0.233 | 1 | 1.2 |
| N4BP1     | 0.022337 | 0.135710191  | 0.205 | 0.187 | 1 | 1.2 |
| PTTG1IP   | 0.022715 | 0.113533969  | 0.154 | 0.136 | 1 | 1.2 |
| SKIL      | 0.022732 | 0.102174176  | 0.105 | 0.09  | 1 | 1.2 |
| SRPRA     | 0.023074 | 0.102611828  | 0.08  | 0.067 | 1 | 1.2 |
| RNASE4    | 0.023278 | 0.110632078  | 0.082 | 0.069 | 1 | 1.2 |
| SAV1      | 0.023977 | 0.1144822    | 0.382 | 0.374 | 1 | 1.2 |
| ATF3      | 0.024042 | -0.227779642 | 0.327 | 0.349 | 1 | 1.2 |
| ANKUB1    | 0.024228 | 0.165975692  | 0.15  | 0.134 | 1 | 1.2 |
| WHSC1     | 0.024347 | 0.103465578  | 0.132 | 0.116 | 1 | 1.2 |
| PLIN3     | 0.024501 | 0.111154343  | 0.122 | 0.106 | 1 | 1.2 |
| NME7      | 0.025386 | 0.104196129  | 0.106 | 0.091 | 1 | 1.2 |
| TNF       | 0.027731 | 0.166926976  | 0.115 | 0.1   | 1 | 1.2 |
| NUMB      | 0.02824  | 0.104732757  | 0.452 | 0.443 | 1 | 1.2 |
| DAD1      | 0.028293 | 0.123693949  | 0.513 | 0.52  | 1 | 1.2 |
| GSAP      | 0.028648 | 0.132130271  | 0.165 | 0.149 | 1 | 1.2 |
| KIF5B     | 0.029337 | 0.115016094  | 0.269 | 0.255 | 1 | 1.2 |
| EIF3J     | 0.03018  | 0.102271291  | 0.165 | 0.148 | 1 | 1.2 |
| NDUFV2    | 0.030364 | 0.108816278  | 0.167 | 0.15  | 1 | 1.2 |
| VPS35     | 0.031515 | 0.140360515  | 0.294 | 0.282 | 1 | 1.2 |
| FUS       | 0.031544 | 0.100231401  | 0.308 | 0.291 | 1 | 1.2 |
| BCYRN1    | 0.031566 | 0.10160614   | 0.065 | 0.053 | 1 | 1.2 |
| USP32     | 0.031632 | 0.103819733  | 0.213 | 0.197 | 1 | 1.2 |
| MAPK8     | 0.032891 | 0.130222419  | 0.228 | 0.212 | 1 | 1.2 |
| PPP1R12A  | 0.033964 | 0.123520144  | 0.223 | 0.208 | 1 | 1.2 |
| ATP5EP2   | 0.034113 | 0.120868209  | 0.219 | 0.202 | 1 | 1.2 |
| RAPH1     | 0.034423 | 0.142212462  | 0.204 | 0.19  | 1 | 1.2 |
| EIF3A     | 0.035245 | 0.127156728  | 0.353 | 0.342 | 1 | 1.2 |
| DCAF13    | 0.035667 | 0.101987058  | 0.095 | 0.082 | 1 | 1.2 |
| CDK7      | 0.036281 | 0.109357494  | 0.129 | 0.115 | 1 | 1.2 |
| ANKRD28   | 0.036355 | -0.100095575 | 0.283 | 0.311 | 1 | 1.2 |
| STK3      | 0.036688 | 0.120926224  | 0.381 | 0.372 | 1 | 1.2 |
| SERINC5   | 0.037101 | 0.12188938   | 0.251 | 0.237 | 1 | 1.2 |
| EGFR      | 0.037728 | 0.137326057  | 0.345 | 0.333 | 1 | 1.2 |
| HSPA4     | 0.037746 | 0.111500411  | 0.122 | 0.108 | 1 | 1.2 |
| RASA1     | 0.039769 | 0.113991739  | 0.215 | 0.199 | 1 | 1.2 |
| LINC00662 | 0.039956 | 0.107799532  | 0.095 | 0.082 | 1 | 1.2 |
| KEAP1     | 0.040902 | 0.131614515  | 0.049 | 0.039 | 1 | 1.2 |
| LRRC49    | 0.041254 | 0.153322837  | 0.135 | 0.121 | 1 | 1.2 |

|           |          |              |       |       |   |     |
|-----------|----------|--------------|-------|-------|---|-----|
| HMGCS1    | 0.041934 | 0.10768506   | 0.247 | 0.232 | 1 | 1.2 |
| KIAA0368  | 0.043384 | 0.142033413  | 0.239 | 0.226 | 1 | 1.2 |
| HECA      | 0.044863 | 0.102019084  | 0.118 | 0.105 | 1 | 1.2 |
| UBN2      | 0.045761 | 0.100534249  | 0.159 | 0.144 | 1 | 1.2 |
| SH3PXD2B  | 0.047121 | 0.100954468  | 0.144 | 0.129 | 1 | 1.2 |
| DPM1      | 0.047217 | 0.110737565  | 0.282 | 0.27  | 1 | 1.2 |
| ABHD2     | 0.047667 | 0.102918513  | 0.111 | 0.097 | 1 | 1.2 |
| VDAC1     | 0.049005 | 0.108953802  | 0.228 | 0.214 | 1 | 1.2 |
| SLC16A13  | 0.050452 | -0.144885935 | 0.044 | 0.055 | 1 | 1.2 |
| GCC2-AS1  | 0.051159 | 0.167671328  | 0.049 | 0.04  | 1 | 1.2 |
| STAG2     | 0.053673 | 0.115879687  | 0.373 | 0.371 | 1 | 1.2 |
| ENAH      | 0.054271 | -0.157110679 | 0.462 | 0.495 | 1 | 1.2 |
| BPGM      | 0.055761 | 0.117282742  | 0.176 | 0.162 | 1 | 1.2 |
| RAN       | 0.055812 | 0.12454699   | 0.593 | 0.607 | 1 | 1.2 |
| LINC01588 | 0.05748  | 0.122338132  | 0.101 | 0.089 | 1 | 1.2 |
| FAM134B   | 0.057934 | 0.118738873  | 0.161 | 0.148 | 1 | 1.2 |
| TRMT10C   | 0.058661 | 0.106499231  | 0.137 | 0.125 | 1 | 1.2 |
| FARP1     | 0.060337 | 0.110078576  | 0.322 | 0.309 | 1 | 1.2 |
| SET       | 0.060835 | 0.163904215  | 0.482 | 0.488 | 1 | 1.2 |
| HK2       | 0.060942 | -0.125064253 | 0.16  | 0.175 | 1 | 1.2 |
| PSME4     | 0.061987 | -0.165956348 | 0.68  | 0.706 | 1 | 1.2 |
| CYP24A1   | 0.063619 | 0.171192982  | 0.208 | 0.236 | 1 | 1.2 |
| MED6      | 0.064029 | 0.103492518  | 0.183 | 0.17  | 1 | 1.2 |
| OTUD7B    | 0.064418 | -0.111021639 | 0.156 | 0.173 | 1 | 1.2 |
| CCNI      | 0.064622 | 0.107387243  | 0.578 | 0.601 | 1 | 1.2 |
| LUCAT1    | 0.066549 | 0.152643922  | 0.408 | 0.397 | 1 | 1.2 |
| C5orf28   | 0.06691  | 0.101414253  | 0.19  | 0.178 | 1 | 1.2 |
| GABARAPL  | 0.070019 | 0.103240504  | 0.163 | 0.152 | 1 | 1.2 |
| UBE2R2    | 0.071546 | 0.101364526  | 0.337 | 0.327 | 1 | 1.2 |
| XDH       | 0.074113 | 0.113962592  | 0.126 | 0.114 | 1 | 1.2 |
| EDF1      | 0.074504 | 0.142179051  | 0.086 | 0.075 | 1 | 1.2 |
| HK1       | 0.075624 | 0.10984128   | 0.13  | 0.118 | 1 | 1.2 |
| SH2B1     | 0.077871 | -0.105168886 | 0.019 | 0.025 | 1 | 1.2 |
| ACSS2     | 0.07899  | 0.100315743  | 0.188 | 0.176 | 1 | 1.2 |
| FBXO34    | 0.079886 | 0.1291744    | 0.198 | 0.188 | 1 | 1.2 |
| GBP1      | 0.081236 | -0.157068462 | 0.179 | 0.194 | 1 | 1.2 |
| STX5      | 0.082306 | 0.10209705   | 0.199 | 0.186 | 1 | 1.2 |
| NCL       | 0.082944 | 0.175695985  | 0.215 | 0.203 | 1 | 1.2 |
| MXD1      | 0.083321 | -0.101035134 | 0.148 | 0.164 | 1 | 1.2 |
| ORMDL2    | 0.085414 | 0.108518024  | 0.172 | 0.16  | 1 | 1.2 |
| TAF7      | 0.085435 | 0.107823014  | 0.156 | 0.144 | 1 | 1.2 |
| TCEANC2   | 0.085583 | 0.126224249  | 0.222 | 0.211 | 1 | 1.2 |
| ITSN1     | 0.091127 | 0.112079246  | 0.14  | 0.129 | 1 | 1.2 |
| NBPF19    | 0.091315 | 0.119407266  | 0.195 | 0.183 | 1 | 1.2 |
| KCND2     | 0.092829 | -0.111118939 | 0.079 | 0.091 | 1 | 1.2 |
| DENND5A   | 0.096254 | -0.105672471 | 0.339 | 0.36  | 1 | 1.2 |
| DHRX      | 0.098053 | 0.100314518  | 0.232 | 0.221 | 1 | 1.2 |

|           |          |              |       |       |   |     |
|-----------|----------|--------------|-------|-------|---|-----|
| SEC61B    | 0.098715 | 0.167654597  | 0.12  | 0.11  | 1 | 1.2 |
| HSPA5     | 0.104695 | -0.296479599 | 0.383 | 0.399 | 1 | 1.2 |
| TNPO1     | 0.105524 | 0.138132927  | 0.228 | 0.219 | 1 | 1.2 |
| ZNF609    | 0.109731 | 0.136460477  | 0.522 | 0.536 | 1 | 1.2 |
| IRF2      | 0.11169  | 0.123740622  | 0.301 | 0.296 | 1 | 1.2 |
| MT-ND4L   | 0.112971 | 0.13200994   | 0.519 | 0.538 | 1 | 1.2 |
| LTBP1     | 0.113785 | 0.162931561  | 0.233 | 0.223 | 1 | 1.2 |
| CCNC      | 0.11414  | 0.100651093  | 0.27  | 0.262 | 1 | 1.2 |
| C6orf62   | 0.118424 | 0.103588358  | 0.182 | 0.173 | 1 | 1.2 |
| NUDC      | 0.125106 | 0.100190291  | 0.063 | 0.055 | 1 | 1.2 |
| FAM35A    | 0.141312 | 0.126082357  | 0.123 | 0.113 | 1 | 1.2 |
| CCNY      | 0.156748 | -0.132744609 | 0.248 | 0.264 | 1 | 1.2 |
| TRPM7     | 0.168361 | 0.106833792  | 0.194 | 0.186 | 1 | 1.2 |
| MT2A      | 0.169354 | -0.335560497 | 0.068 | 0.077 | 1 | 1.2 |
| G3BP1     | 0.169506 | 0.107355589  | 0.18  | 0.172 | 1 | 1.2 |
| UBE2D2    | 0.172401 | 0.100153304  | 0.223 | 0.215 | 1 | 1.2 |
| TBC1D15   | 0.181377 | 0.104124668  | 0.289 | 0.284 | 1 | 1.2 |
| ICAM1     | 0.182365 | 0.117644427  | 0.165 | 0.157 | 1 | 1.2 |
| HERC1     | 0.185207 | -0.105540001 | 0.38  | 0.397 | 1 | 1.2 |
| FGFR1     | 0.185512 | -0.185713596 | 0.161 | 0.169 | 1 | 1.2 |
| LALBA     | 0.194028 | -0.245960333 | 0.011 | 0.014 | 1 | 1.2 |
| SENP5     | 0.202507 | 0.113341938  | 0.211 | 0.206 | 1 | 1.2 |
| UBE2J1    | 0.206269 | 0.102435067  | 0.199 | 0.191 | 1 | 1.2 |
| ADGRA3    | 0.207639 | 0.118539757  | 0.139 | 0.131 | 1 | 1.2 |
| RP11-122M | 0.212832 | 0.103420709  | 0.022 | 0.018 | 1 | 1.2 |
| CCNG2     | 0.234099 | 0.10085037   | 0.157 | 0.151 | 1 | 1.2 |
| ARHGAP21  | 0.23433  | 0.123298568  | 0.246 | 0.241 | 1 | 1.2 |
| PTGES3    | 0.242866 | 0.102469278  | 0.216 | 0.211 | 1 | 1.2 |
| USP25     | 0.244289 | 0.102976481  | 0.163 | 0.155 | 1 | 1.2 |
| MYO5C     | 0.245174 | 0.120130915  | 0.111 | 0.104 | 1 | 1.2 |
| ASTN2     | 0.252441 | 0.110704909  | 0.225 | 0.221 | 1 | 1.2 |
| CLIP1     | 0.28245  | 0.119043407  | 0.382 | 0.384 | 1 | 1.2 |
| C2orf88   | 0.288309 | 0.14609844   | 0.377 | 0.389 | 1 | 1.2 |
| DTNA      | 0.305458 | -0.24817951  | 0.723 | 0.721 | 1 | 1.2 |
| CARHSP1   | 0.331032 | 0.127587417  | 0.274 | 0.272 | 1 | 1.2 |
| ZNF462    | 0.350778 | 0.124606972  | 0.343 | 0.35  | 1 | 1.2 |
| RP11-37B2 | 0.353955 | 0.175133723  | 0.287 | 0.294 | 1 | 1.2 |
| NCOA2     | 0.362103 | 0.149789872  | 0.487 | 0.502 | 1 | 1.2 |
| URB1      | 0.362238 | 0.147917737  | 0.054 | 0.06  | 1 | 1.2 |
| PLEKHG1   | 0.418354 | 0.119405468  | 0.178 | 0.174 | 1 | 1.2 |
| OSER1     | 0.424716 | -0.331542288 | 0.581 | 0.541 | 1 | 1.2 |
| BRINP1    | 0.438431 | 0.181578558  | 0.191 | 0.205 | 1 | 1.2 |
| ZC3H7A    | 0.441667 | 0.217564836  | 0.182 | 0.195 | 1 | 1.2 |
| EIF2S1    | 0.45841  | 0.136431487  | 0.257 | 0.262 | 1 | 1.2 |
| LRCH3     | 0.481092 | 0.107355518  | 0.358 | 0.368 | 1 | 1.2 |
| CXCL1     | 0.487443 | 0.126014295  | 0.255 | 0.251 | 1 | 1.2 |
| ZCCHC2    | 0.506449 | 0.127019753  | 0.307 | 0.31  | 1 | 1.2 |

|           |           |              |       |       |           |     |
|-----------|-----------|--------------|-------|-------|-----------|-----|
| PPIB      | 0.526307  | 0.136895052  | 0.12  | 0.118 | 1         | 1.2 |
| RP11-356C | 0.559809  | 0.124514941  | 0.251 | 0.253 | 1         | 1.2 |
| CYSTM1    | 0.572288  | 0.101465069  | 0.164 | 0.163 | 1         | 1.2 |
| MMP7      | 0.58555   | 0.165731507  | 0.297 | 0.317 | 1         | 1.2 |
| LGALS1    | 0.601926  | 0.153423393  | 0.078 | 0.076 | 1         | 1.2 |
| RPL18     | 0.617245  | 0.100743618  | 0.123 | 0.12  | 1         | 1.2 |
| SPECC1    | 0.634177  | 0.110802495  | 0.058 | 0.056 | 1         | 1.2 |
| TGFB2     | 0.69982   | 0.106615778  | 0.244 | 0.244 | 1         | 1.2 |
| MRPL33    | 0.703385  | 0.105352042  | 0.412 | 0.434 | 1         | 1.2 |
| PLOD2     | 0.739075  | 0.124545399  | 0.16  | 0.16  | 1         | 1.2 |
| CCL4      | 0.755717  | 0.220276026  | 0.085 | 0.088 | 1         | 1.2 |
| FAU       | 0.850615  | 0.151888053  | 0.205 | 0.211 | 1         | 1.2 |
| CYR61     | 0.952452  | -0.43113963  | 0.291 | 0.283 | 1         | 1.2 |
| MGST1     | 7.87E-272 | 0.909606936  | 0.958 | 0.858 | 1.90E-267 | 1.3 |
| LRRFIP2   | 4.79E-215 | -1.369296875 | 0.694 | 0.855 | 1.15E-210 | 1.3 |
| CD59      | 4.19E-202 | 0.752855186  | 0.966 | 0.83  | 1.01E-197 | 1.3 |
| S100A11   | 2.05E-193 | 0.959979558  | 0.879 | 0.646 | 4.95E-189 | 1.3 |
| FDPS      | 2.29E-181 | 1.01505751   | 0.681 | 0.387 | 5.52E-177 | 1.3 |
| SAA1      | 1.80E-179 | 0.868588867  | 0.99  | 0.942 | 4.34E-175 | 1.3 |
| RP5-1198O | 1.29E-156 | 0.779867277  | 0.332 | 0.099 | 3.11E-152 | 1.3 |
| CYP24A1   | 3.30E-149 | 0.979631205  | 0.422 | 0.164 | 7.95E-145 | 1.3 |
| LUCAT1    | 3.92E-143 | 0.800071959  | 0.621 | 0.323 | 9.45E-139 | 1.3 |
| OSER1     | 8.91E-138 | -1.456712036 | 0.393 | 0.604 | 2.15E-133 | 1.3 |
| AKR1C3    | 2.89E-137 | 0.731871912  | 0.365 | 0.132 | 6.97E-133 | 1.3 |
| PRDX1     | 7.40E-136 | 0.842829984  | 0.838 | 0.677 | 1.78E-131 | 1.3 |
| SLC12A2   | 4.73E-131 | 0.92244878   | 0.731 | 0.474 | 1.14E-126 | 1.3 |
| RARRES1   | 7.47E-130 | 0.683158979  | 0.624 | 0.324 | 1.80E-125 | 1.3 |
| DTNA      | 1.34E-128 | -1.064242759 | 0.602 | 0.762 | 3.23E-124 | 1.3 |
| DEFB1     | 2.32E-128 | 0.902077187  | 0.773 | 0.538 | 5.59E-124 | 1.3 |
| HSPA8     | 2.04E-122 | 0.820825263  | 0.71  | 0.5   | 4.91E-118 | 1.3 |
| SAT1      | 4.81E-118 | 0.652997042  | 0.979 | 0.956 | 1.16E-113 | 1.3 |
| MLLT4     | 1.82E-115 | -0.971010394 | 0.538 | 0.705 | 4.38E-111 | 1.3 |
| CXCL17    | 1.41E-110 | 0.961681925  | 0.334 | 0.133 | 3.40E-106 | 1.3 |
| MYO5B     | 2.32E-108 | -1.181257377 | 0.471 | 0.641 | 5.60E-104 | 1.3 |
| PDLIM5    | 4.54E-108 | -0.70531712  | 0.765 | 0.864 | 1.09E-103 | 1.3 |
| SOD2      | 1.80E-106 | 0.488349461  | 0.996 | 0.928 | 4.35E-102 | 1.3 |
| TSHZ2     | 3.33E-106 | 0.783662391  | 0.649 | 0.402 | 8.03E-102 | 1.3 |
| PI3       | 2.09E-101 | 1.067994074  | 0.467 | 0.237 | 5.05E-97  | 1.3 |
| ZMYND8    | 8.36E-100 | 0.664410584  | 0.428 | 0.203 | 2.02E-95  | 1.3 |
| TRIO      | 1.74E-97  | -1.060024761 | 0.683 | 0.764 | 4.20E-93  | 1.3 |
| PDE4B     | 4.57E-93  | -0.661583648 | 0.885 | 0.922 | 1.10E-88  | 1.3 |
| DHFR      | 1.67E-91  | -0.645924242 | 0.785 | 0.87  | 4.03E-87  | 1.3 |
| FTX       | 1.72E-85  | 0.465197642  | 0.738 | 0.476 | 4.15E-81  | 1.3 |
| ANKRD36C  | 6.20E-84  | 0.650409755  | 0.72  | 0.505 | 1.50E-79  | 1.3 |
| HSPA5     | 1.41E-83  | -1.521688578 | 0.255 | 0.443 | 3.40E-79  | 1.3 |
| ABI1      | 5.30E-83  | -0.715510105 | 0.645 | 0.757 | 1.28E-78  | 1.3 |
| TM4SF18   | 2.06E-82  | 0.532091193  | 0.183 | 0.054 | 4.96E-78  | 1.3 |

|           |          |              |       |       |          |     |
|-----------|----------|--------------|-------|-------|----------|-----|
| LINC-PINT | 1.13E-79 | 0.654311425  | 0.703 | 0.491 | 2.72E-75 | 1.3 |
| LINC01152 | 6.20E-79 | 0.634060681  | 0.238 | 0.088 | 1.49E-74 | 1.3 |
| OVOS2     | 3.24E-78 | 0.730758294  | 0.656 | 0.448 | 7.82E-74 | 1.3 |
| FNBP1     | 6.68E-77 | -0.774207986 | 0.357 | 0.531 | 1.61E-72 | 1.3 |
| EIF4G3    | 1.07E-76 | 0.54448063   | 0.481 | 0.271 | 2.57E-72 | 1.3 |
| MYO6      | 1.08E-76 | -0.81751344  | 0.552 | 0.679 | 2.59E-72 | 1.3 |
| EBP       | 1.78E-75 | 0.423024195  | 0.205 | 0.07  | 4.29E-71 | 1.3 |
| BICD1     | 2.24E-73 | 0.527770572  | 0.323 | 0.151 | 5.39E-69 | 1.3 |
| DPYD      | 2.25E-73 | 0.587196699  | 0.704 | 0.473 | 5.42E-69 | 1.3 |
| PLCB1     | 3.64E-73 | 0.526646707  | 0.559 | 0.343 | 8.78E-69 | 1.3 |
| PSME4     | 1.57E-72 | -0.828540968 | 0.634 | 0.723 | 3.80E-68 | 1.3 |
| TBC1D5    | 1.76E-72 | 0.538097041  | 0.511 | 0.303 | 4.25E-68 | 1.3 |
| AKR1C1    | 4.78E-71 | 0.689754587  | 0.228 | 0.087 | 1.15E-66 | 1.3 |
| TACC1     | 6.48E-71 | 0.514405995  | 0.372 | 0.189 | 1.56E-66 | 1.3 |
| ZFAS1     | 1.20E-70 | -0.390086062 | 0.949 | 0.967 | 2.90E-66 | 1.3 |
| AC005152. | 6.26E-70 | 0.66483992   | 0.287 | 0.128 | 1.51E-65 | 1.3 |
| UBC       | 1.20E-69 | -1.098308066 | 0.941 | 0.953 | 2.90E-65 | 1.3 |
| FDFT1     | 2.64E-69 | 0.561207066  | 0.482 | 0.29  | 6.37E-65 | 1.3 |
| TMTC2     | 5.97E-69 | 0.539944479  | 0.46  | 0.26  | 1.44E-64 | 1.3 |
| VAMP8     | 1.23E-68 | 0.447463814  | 0.802 | 0.665 | 2.96E-64 | 1.3 |
| ZBTB38    | 6.32E-68 | 0.469584513  | 0.47  | 0.269 | 1.52E-63 | 1.3 |
| DAAM1     | 3.29E-67 | -0.85855649  | 0.41  | 0.551 | 7.93E-63 | 1.3 |
| DHCR24    | 6.61E-67 | 0.413392108  | 0.286 | 0.129 | 1.59E-62 | 1.3 |
| CYR61     | 1.18E-66 | -1.661416152 | 0.161 | 0.327 | 2.84E-62 | 1.3 |
| IER3      | 2.40E-66 | 0.570646623  | 0.256 | 0.11  | 5.79E-62 | 1.3 |
| ACAT2     | 3.13E-66 | 0.598996845  | 0.426 | 0.245 | 7.55E-62 | 1.3 |
| RASA2     | 6.02E-66 | -0.892627185 | 0.558 | 0.656 | 1.45E-61 | 1.3 |
| APP       | 6.51E-66 | 0.498605986  | 0.866 | 0.737 | 1.57E-61 | 1.3 |
| MSMO1     | 3.32E-65 | 0.420090594  | 0.41  | 0.222 | 8.00E-61 | 1.3 |
| SC5D      | 3.26E-63 | 0.359004719  | 0.18  | 0.062 | 7.86E-59 | 1.3 |
| HNRNPC    | 1.04E-62 | -0.549644157 | 0.757 | 0.822 | 2.50E-58 | 1.3 |
| PIK3R1    | 4.09E-62 | 0.533829464  | 0.401 | 0.221 | 9.87E-58 | 1.3 |
| SPIDR     | 5.19E-62 | 0.444685965  | 0.746 | 0.539 | 1.25E-57 | 1.3 |
| FOXP1     | 7.12E-62 | 0.423196552  | 0.713 | 0.495 | 1.72E-57 | 1.3 |
| KRT15     | 8.79E-62 | -1.009755143 | 0.218 | 0.383 | 2.12E-57 | 1.3 |
| NPAS2     | 2.62E-61 | 0.50793468   | 0.632 | 0.435 | 6.32E-57 | 1.3 |
| TPD52L1   | 2.74E-61 | 0.48415305   | 0.349 | 0.183 | 6.60E-57 | 1.3 |
| ST8SIA1   | 7.24E-61 | 0.488463965  | 0.297 | 0.142 | 1.75E-56 | 1.3 |
| MRPS6     | 2.44E-60 | 0.483106742  | 0.308 | 0.151 | 5.88E-56 | 1.3 |
| OSBPL9    | 3.33E-60 | -0.861900156 | 0.358 | 0.498 | 8.03E-56 | 1.3 |
| EHBP1     | 6.27E-60 | 0.482334102  | 0.482 | 0.296 | 1.51E-55 | 1.3 |
| TNFSF10   | 8.95E-60 | 0.505537417  | 0.638 | 0.442 | 2.16E-55 | 1.3 |
| S100A4    | 1.58E-58 | 0.394540073  | 0.183 | 0.068 | 3.81E-54 | 1.3 |
| RPL34     | 2.74E-58 | -0.267561341 | 0.977 | 0.987 | 6.60E-54 | 1.3 |
| VNN1      | 3.52E-58 | 0.514374533  | 0.387 | 0.215 | 8.49E-54 | 1.3 |
| TUBA1B    | 1.07E-57 | 0.497547323  | 0.4   | 0.228 | 2.58E-53 | 1.3 |
| DYNLT1    | 2.33E-57 | 0.412750724  | 0.74  | 0.575 | 5.63E-53 | 1.3 |



|           |          |              |       |       |          |     |
|-----------|----------|--------------|-------|-------|----------|-----|
| IDI1      | 2.87E-57 | 0.434943763  | 0.333 | 0.175 | 6.91E-53 | 1.3 |
| TSC22D2   | 4.11E-56 | -0.911516523 | 0.212 | 0.362 | 9.91E-52 | 1.3 |
| SMYD3     | 5.94E-56 | 0.536233997  | 0.348 | 0.191 | 1.43E-51 | 1.3 |
| ADGRF1    | 1.38E-55 | 0.327639513  | 0.129 | 0.038 | 3.32E-51 | 1.3 |
| HSP90B1   | 1.43E-55 | -0.813704906 | 0.363 | 0.504 | 3.44E-51 | 1.3 |
| AZGP1     | 1.40E-54 | 0.695399747  | 0.465 | 0.299 | 3.38E-50 | 1.3 |
| RP4-678D1 | 3.57E-54 | 0.464755154  | 0.264 | 0.125 | 8.62E-50 | 1.3 |
| ARPC3     | 3.77E-53 | 0.423523518  | 0.766 | 0.634 | 9.09E-49 | 1.3 |
| SOS1      | 5.59E-53 | 0.479922767  | 0.511 | 0.339 | 1.35E-48 | 1.3 |
| CTSB      | 6.32E-53 | 0.558284526  | 0.423 | 0.263 | 1.52E-48 | 1.3 |
| HNRNPA1   | 7.13E-53 | -0.503102672 | 0.874 | 0.901 | 1.72E-48 | 1.3 |
| ECHDC1    | 7.95E-53 | 0.385116168  | 0.401 | 0.233 | 1.92E-48 | 1.3 |
| USP39     | 2.95E-52 | 0.398307809  | 0.487 | 0.306 | 7.11E-48 | 1.3 |
| SORBS1    | 4.90E-52 | 0.422452939  | 0.478 | 0.298 | 1.18E-47 | 1.3 |
| GBP2      | 8.94E-52 | -0.523954941 | 0.701 | 0.772 | 2.16E-47 | 1.3 |
| WFDC2     | 1.11E-51 | 0.838350915  | 0.642 | 0.451 | 2.67E-47 | 1.3 |
| AKR1B1    | 1.43E-51 | 0.497458366  | 0.14  | 0.047 | 3.46E-47 | 1.3 |
| SAA2-SAA4 | 1.76E-51 | 0.386284891  | 0.52  | 0.326 | 4.24E-47 | 1.3 |
| EEF1A1    | 2.07E-51 | -0.258412846 | 0.978 | 0.985 | 4.99E-47 | 1.3 |
| CCL2      | 4.51E-51 | 1.001725184  | 0.549 | 0.392 | 1.09E-46 | 1.3 |
| USP53     | 4.57E-51 | -0.946377647 | 0.627 | 0.683 | 1.10E-46 | 1.3 |
| RICTOR    | 5.67E-51 | -0.64766293  | 0.431 | 0.558 | 1.37E-46 | 1.3 |
| ANXA3     | 6.97E-51 | 0.456360934  | 0.541 | 0.37  | 1.68E-46 | 1.3 |
| LTBP1     | 9.41E-51 | 0.488276254  | 0.336 | 0.187 | 2.27E-46 | 1.3 |
| ATP1B1    | 1.18E-50 | 0.743560284  | 0.804 | 0.679 | 2.85E-46 | 1.3 |
| CLIP2     | 1.54E-50 | 0.422140104  | 0.295 | 0.151 | 3.72E-46 | 1.3 |
| RPS4X     | 1.56E-50 | -0.265279358 | 0.977 | 0.986 | 3.76E-46 | 1.3 |
| SFRP1     | 4.27E-50 | 0.420937174  | 0.596 | 0.413 | 1.03E-45 | 1.3 |
| CYP7B1    | 7.13E-50 | 0.466017978  | 0.512 | 0.329 | 1.72E-45 | 1.3 |
| AFF1      | 6.92E-49 | 0.41901328   | 0.418 | 0.256 | 1.67E-44 | 1.3 |
| CHD2      | 7.62E-49 | -0.671750533 | 0.333 | 0.466 | 1.84E-44 | 1.3 |
| EFNA5     | 7.95E-49 | 0.403137626  | 0.642 | 0.447 | 1.92E-44 | 1.3 |
| TMBIM6    | 9.40E-49 | 0.480381745  | 0.859 | 0.779 | 2.27E-44 | 1.3 |
| EGFR      | 1.09E-48 | 0.455301605  | 0.461 | 0.292 | 2.62E-44 | 1.3 |
| GADD45A   | 1.17E-48 | -0.635874235 | 0.128 | 0.268 | 2.82E-44 | 1.3 |
| RNF145    | 1.98E-48 | -0.71396853  | 0.487 | 0.589 | 4.76E-44 | 1.3 |
| L3MBTL4   | 2.20E-48 | 0.431805798  | 0.47  | 0.296 | 5.29E-44 | 1.3 |
| COBL      | 3.93E-48 | -0.749640079 | 0.404 | 0.529 | 9.47E-44 | 1.3 |
| GBP1      | 4.75E-48 | -0.683533419 | 0.092 | 0.225 | 1.14E-43 | 1.3 |
| ATP1A1    | 1.86E-47 | 0.429142461  | 0.635 | 0.469 | 4.48E-43 | 1.3 |
| BACH2     | 2.56E-47 | -0.714948465 | 0.308 | 0.448 | 6.17E-43 | 1.3 |
| LINC01184 | 3.69E-47 | 0.418384427  | 0.326 | 0.183 | 8.89E-43 | 1.3 |
| TRPS1     | 4.78E-47 | 0.339154437  | 0.846 | 0.674 | 1.15E-42 | 1.3 |
| NOP10     | 5.50E-47 | 0.386355109  | 0.591 | 0.429 | 1.33E-42 | 1.3 |
| FAM129A   | 7.61E-47 | -0.682799858 | 0.374 | 0.515 | 1.83E-42 | 1.3 |
| S100A14   | 9.22E-47 | 0.359942212  | 0.774 | 0.63  | 2.22E-42 | 1.3 |
| SCD       | 1.41E-46 | 0.289139639  | 0.157 | 0.06  | 3.41E-42 | 1.3 |

|          |          |              |       |       |          |     |
|----------|----------|--------------|-------|-------|----------|-----|
| H2AFZ    | 2.08E-46 | 0.379715989  | 0.719 | 0.579 | 5.02E-42 | 1.3 |
| FLNB     | 8.88E-46 | -0.694234306 | 0.277 | 0.414 | 2.14E-41 | 1.3 |
| NFIB     | 1.56E-45 | 0.337823812  | 0.932 | 0.824 | 3.77E-41 | 1.3 |
| LRP1B    | 7.46E-45 | 0.861304321  | 0.306 | 0.171 | 1.80E-40 | 1.3 |
| ATP5G2   | 8.29E-45 | -0.501910944 | 0.743 | 0.799 | 2.00E-40 | 1.3 |
| ARL15    | 1.81E-44 | 0.384788871  | 0.313 | 0.173 | 4.37E-40 | 1.3 |
| GHITM    | 2.55E-44 | 0.424408382  | 0.595 | 0.442 | 6.14E-40 | 1.3 |
| C4orf3   | 3.32E-44 | -0.640704616 | 0.557 | 0.65  | 8.01E-40 | 1.3 |
| GAB1     | 4.07E-44 | 0.415042244  | 0.486 | 0.32  | 9.82E-40 | 1.3 |
| RPL22    | 7.21E-44 | -0.411910817 | 0.757 | 0.807 | 1.74E-39 | 1.3 |
| BIRC3    | 8.59E-44 | 0.410788593  | 0.886 | 0.804 | 2.07E-39 | 1.3 |
| S100A6   | 8.78E-44 | 0.687770187  | 0.599 | 0.42  | 2.12E-39 | 1.3 |
| MT-ATP6  | 1.25E-43 | 0.295924757  | 0.988 | 0.986 | 3.00E-39 | 1.3 |
| RBX1     | 1.28E-43 | 0.374848067  | 0.575 | 0.412 | 3.09E-39 | 1.3 |
| PPIA     | 1.28E-43 | 0.296451468  | 0.909 | 0.845 | 3.10E-39 | 1.3 |
| BTG1     | 1.60E-43 | 0.441035905  | 0.589 | 0.428 | 3.87E-39 | 1.3 |
| CALM1    | 1.74E-43 | 0.367492775  | 0.336 | 0.192 | 4.21E-39 | 1.3 |
| LHFPL2   | 1.44E-42 | -0.685801624 | 0.307 | 0.433 | 3.46E-38 | 1.3 |
| CDH1     | 2.55E-42 | -0.604852819 | 0.437 | 0.544 | 6.14E-38 | 1.3 |
| SRP14    | 2.99E-42 | 0.310937891  | 0.886 | 0.83  | 7.21E-38 | 1.3 |
| EIF2AK3  | 3.89E-42 | -0.908204364 | 0.209 | 0.331 | 9.37E-38 | 1.3 |
| WAC      | 4.63E-42 | -0.552976799 | 0.572 | 0.647 | 1.12E-37 | 1.3 |
| GOLGA4   | 4.86E-42 | -0.521511599 | 0.593 | 0.669 | 1.17E-37 | 1.3 |
| SRRM1    | 5.18E-42 | -0.516776273 | 0.608 | 0.676 | 1.25E-37 | 1.3 |
| SLPI     | 5.36E-42 | 0.335167674  | 0.891 | 0.788 | 1.29E-37 | 1.3 |
| RERG     | 6.38E-42 | 0.392095061  | 0.248 | 0.126 | 1.54E-37 | 1.3 |
| SLC26A2  | 1.03E-41 | 0.401771238  | 0.251 | 0.129 | 2.48E-37 | 1.3 |
| EIF4E2   | 1.57E-41 | 0.362916609  | 0.518 | 0.357 | 3.79E-37 | 1.3 |
| MAP3K5   | 1.58E-41 | 0.390851477  | 0.439 | 0.282 | 3.81E-37 | 1.3 |
| CHPT1    | 2.01E-41 | 0.434594086  | 0.507 | 0.347 | 4.84E-37 | 1.3 |
| NTN4     | 2.10E-41 | 0.461026841  | 0.272 | 0.147 | 5.06E-37 | 1.3 |
| RIPK2    | 3.36E-41 | -0.638962415 | 0.299 | 0.431 | 8.10E-37 | 1.3 |
| SIK3     | 6.29E-41 | -0.295238835 | 0.977 | 0.986 | 1.52E-36 | 1.3 |
| AUH      | 9.62E-41 | -0.671647501 | 0.245 | 0.37  | 2.32E-36 | 1.3 |
| MRPL27   | 1.51E-40 | 0.300994635  | 0.263 | 0.14  | 3.65E-36 | 1.3 |
| RSU1     | 4.45E-40 | 0.364331558  | 0.292 | 0.164 | 1.07E-35 | 1.3 |
| RPL30    | 5.78E-40 | -0.235684876 | 0.973 | 0.983 | 1.39E-35 | 1.3 |
| TMEM126E | 6.71E-40 | 0.270433113  | 0.2   | 0.095 | 1.62E-35 | 1.3 |
| CAMTA1   | 7.46E-40 | -0.548660901 | 0.442 | 0.551 | 1.80E-35 | 1.3 |
| FGFR1    | 1.42E-39 | -0.645130073 | 0.083 | 0.196 | 3.42E-35 | 1.3 |
| FABP7    | 1.56E-39 | -1.162799325 | 0.13  | 0.253 | 3.76E-35 | 1.3 |
| RBM47    | 1.59E-39 | 0.342414846  | 0.722 | 0.545 | 3.84E-35 | 1.3 |
| SYNPO2   | 2.07E-39 | -0.711599336 | 0.111 | 0.235 | 4.99E-35 | 1.3 |
| ZCCHC17  | 3.70E-39 | 0.34924662   | 0.424 | 0.274 | 8.93E-35 | 1.3 |
| TPCN1    | 4.32E-39 | 0.395875674  | 0.197 | 0.094 | 1.04E-34 | 1.3 |
| DIAPH2   | 2.63E-38 | 0.375631704  | 0.38  | 0.238 | 6.34E-34 | 1.3 |
| SELK     | 2.81E-38 | -0.598001225 | 0.632 | 0.69  | 6.77E-34 | 1.3 |

|           |          |              |       |       |          |     |
|-----------|----------|--------------|-------|-------|----------|-----|
| GGPS1     | 3.31E-38 | 0.299568269  | 0.299 | 0.17  | 7.98E-34 | 1.3 |
| STAG1     | 5.72E-38 | 0.343467492  | 0.605 | 0.439 | 1.38E-33 | 1.3 |
| SIPA1L1   | 7.42E-38 | 0.353112695  | 0.471 | 0.317 | 1.79E-33 | 1.3 |
| SGK1      | 1.83E-37 | 0.341812593  | 0.267 | 0.147 | 4.40E-33 | 1.3 |
| 5-Mar     | 2.87E-37 | -0.57513259  | 0.144 | 0.263 | 6.92E-33 | 1.3 |
| NUDT5     | 3.73E-37 | 0.306514256  | 0.273 | 0.153 | 9.00E-33 | 1.3 |
| HIST1H2AC | 3.76E-37 | 0.330779409  | 0.432 | 0.28  | 9.08E-33 | 1.3 |
| EVA1C     | 5.97E-37 | 0.231469963  | 0.589 | 0.401 | 1.44E-32 | 1.3 |
| ENAH      | 5.97E-37 | -0.651779027 | 0.417 | 0.512 | 1.44E-32 | 1.3 |
| MRPL13    | 6.70E-37 | 0.295607391  | 0.27  | 0.149 | 1.62E-32 | 1.3 |
| ADAM9     | 7.43E-37 | -0.633244599 | 0.522 | 0.598 | 1.79E-32 | 1.3 |
| IDH1      | 9.59E-37 | 0.223622305  | 0.13  | 0.051 | 2.31E-32 | 1.3 |
| DTNB      | 1.32E-36 | 0.315135342  | 0.705 | 0.536 | 3.17E-32 | 1.3 |
| C15orf48  | 1.58E-36 | 0.577845542  | 0.593 | 0.451 | 3.80E-32 | 1.3 |
| NAPG      | 2.79E-36 | 0.28947812   | 0.283 | 0.16  | 6.72E-32 | 1.3 |
| TAF1D     | 3.06E-36 | -0.527167592 | 0.229 | 0.354 | 7.39E-32 | 1.3 |
| GLIS3     | 4.17E-36 | 0.308274423  | 0.397 | 0.25  | 1.00E-31 | 1.3 |
| HIST1H2BB | 6.27E-36 | 0.391838881  | 0.214 | 0.111 | 1.51E-31 | 1.3 |
| HCAR2     | 1.30E-35 | -0.731332025 | 0.117 | 0.23  | 3.14E-31 | 1.3 |
| LINGO2    | 2.86E-35 | 0.596330578  | 0.122 | 0.048 | 6.89E-31 | 1.3 |
| MED31     | 3.56E-35 | 0.290361461  | 0.28  | 0.16  | 8.58E-31 | 1.3 |
| BTBD9     | 4.41E-35 | 0.348921873  | 0.288 | 0.167 | 1.06E-30 | 1.3 |
| RPS24     | 4.88E-35 | -0.214984943 | 0.975 | 0.985 | 1.18E-30 | 1.3 |
| CACHD1    | 1.20E-34 | 0.280092551  | 0.154 | 0.069 | 2.90E-30 | 1.3 |
| TUBA1A    | 1.32E-34 | 0.437855808  | 0.349 | 0.221 | 3.19E-30 | 1.3 |
| PLA2R1    | 1.95E-34 | 0.311667006  | 0.337 | 0.205 | 4.69E-30 | 1.3 |
| ATP1B3    | 2.71E-34 | 0.340718609  | 0.367 | 0.234 | 6.55E-30 | 1.3 |
| AKR1C2    | 3.17E-34 | 0.325055749  | 0.135 | 0.057 | 7.64E-30 | 1.3 |
| CRIM1     | 3.68E-34 | -0.589691952 | 0.431 | 0.527 | 8.86E-30 | 1.3 |
| RPL31     | 4.69E-34 | -0.259393866 | 0.959 | 0.966 | 1.13E-29 | 1.3 |
| PLXDC2    | 6.94E-34 | 0.324113963  | 0.333 | 0.206 | 1.67E-29 | 1.3 |
| ARHGAP44  | 8.57E-34 | 0.359575004  | 0.338 | 0.21  | 2.07E-29 | 1.3 |
| PAPSS1    | 1.34E-33 | 0.33655626   | 0.483 | 0.339 | 3.23E-29 | 1.3 |
| DOCK1     | 2.17E-33 | 0.34597591   | 0.406 | 0.265 | 5.22E-29 | 1.3 |
| GUCY1A3   | 2.60E-33 | 0.306851879  | 0.326 | 0.198 | 6.28E-29 | 1.3 |
| UBE2H     | 3.31E-33 | -0.431694708 | 0.672 | 0.732 | 7.97E-29 | 1.3 |
| TXNIP     | 4.55E-33 | 0.224173163  | 0.593 | 0.419 | 1.10E-28 | 1.3 |
| PPP2R3A   | 5.94E-33 | 0.304561016  | 0.525 | 0.37  | 1.43E-28 | 1.3 |
| TOMM7     | 6.14E-33 | -0.304758561 | 0.888 | 0.913 | 1.48E-28 | 1.3 |
| DENND5A   | 6.23E-33 | -0.483861016 | 0.267 | 0.385 | 1.50E-28 | 1.3 |
| ACACA     | 6.78E-33 | 0.285617218  | 0.234 | 0.128 | 1.64E-28 | 1.3 |
| RSRC1     | 7.63E-33 | 0.314682688  | 0.354 | 0.224 | 1.84E-28 | 1.3 |
| RPS27L    | 7.76E-33 | 0.373533632  | 0.633 | 0.494 | 1.87E-28 | 1.3 |
| BPTF      | 1.46E-32 | 0.29587819   | 0.444 | 0.298 | 3.51E-28 | 1.3 |
| S100A13   | 2.07E-32 | 0.358656008  | 0.694 | 0.575 | 4.99E-28 | 1.3 |
| PDZK1IP1  | 2.52E-32 | 0.349103979  | 0.254 | 0.144 | 6.08E-28 | 1.3 |
| RERE      | 5.76E-32 | 0.314269306  | 0.537 | 0.394 | 1.39E-27 | 1.3 |

|           |          |              |       |       |          |     |
|-----------|----------|--------------|-------|-------|----------|-----|
| PKM       | 6.01E-32 | 0.373188848  | 0.349 | 0.223 | 1.45E-27 | 1.3 |
| RPS15A    | 6.75E-32 | -0.240044946 | 0.958 | 0.974 | 1.63E-27 | 1.3 |
| ARID1B    | 7.53E-32 | 0.294287881  | 0.522 | 0.369 | 1.82E-27 | 1.3 |
| COA1      | 7.99E-32 | 0.295708305  | 0.373 | 0.239 | 1.93E-27 | 1.3 |
| IRF2BPL   | 9.04E-32 | 0.252488361  | 0.199 | 0.104 | 2.18E-27 | 1.3 |
| LTF       | 9.56E-32 | 0.148245099  | 0.803 | 0.619 | 2.31E-27 | 1.3 |
| MKL1      | 1.01E-31 | -0.599498321 | 0.426 | 0.509 | 2.42E-27 | 1.3 |
| PHLDA1    | 1.31E-31 | 0.282148501  | 0.253 | 0.144 | 3.17E-27 | 1.3 |
| PSMB1     | 1.37E-31 | 0.345902333  | 0.565 | 0.427 | 3.30E-27 | 1.3 |
| MGST3     | 1.42E-31 | 0.309513864  | 0.598 | 0.457 | 3.42E-27 | 1.3 |
| FZD7      | 1.42E-31 | 0.238930215  | 0.136 | 0.06  | 3.43E-27 | 1.3 |
| RTN4      | 2.42E-31 | -0.475002521 | 0.577 | 0.645 | 5.83E-27 | 1.3 |
| ARG2      | 3.79E-31 | 0.209268674  | 0.232 | 0.127 | 9.14E-27 | 1.3 |
| GRHL2     | 4.01E-31 | 0.342377807  | 0.373 | 0.242 | 9.68E-27 | 1.3 |
| TULP4     | 4.99E-31 | -0.533643118 | 0.426 | 0.52  | 1.20E-26 | 1.3 |
| TUBB      | 5.82E-31 | 0.371053162  | 0.449 | 0.316 | 1.40E-26 | 1.3 |
| DMKN      | 6.14E-31 | 0.255111355  | 0.175 | 0.087 | 1.48E-26 | 1.3 |
| SREBF2    | 6.93E-31 | 0.314578373  | 0.465 | 0.325 | 1.67E-26 | 1.3 |
| SKAP2     | 1.23E-30 | 0.317580819  | 0.426 | 0.289 | 2.96E-26 | 1.3 |
| SLC20A2   | 1.57E-30 | -0.611206422 | 0.309 | 0.412 | 3.80E-26 | 1.3 |
| FADS1     | 1.59E-30 | 0.169667383  | 0.064 | 0.017 | 3.83E-26 | 1.3 |
| RALGAPA2  | 1.75E-30 | 0.24862589   | 0.275 | 0.162 | 4.23E-26 | 1.3 |
| CHMP5     | 3.01E-30 | 0.331615997  | 0.44  | 0.31  | 7.27E-26 | 1.3 |
| RPL37     | 3.33E-30 | -0.226819764 | 0.967 | 0.976 | 8.03E-26 | 1.3 |
| GPBP1     | 3.41E-30 | -0.473650121 | 0.57  | 0.633 | 8.23E-26 | 1.3 |
| EXOC4     | 4.31E-30 | 0.312571139  | 0.391 | 0.261 | 1.04E-25 | 1.3 |
| SRPX2     | 4.32E-30 | 0.185092417  | 0.085 | 0.029 | 1.04E-25 | 1.3 |
| ATP6V0E1  | 4.71E-30 | 0.266683543  | 0.756 | 0.636 | 1.13E-25 | 1.3 |
| PRKCE     | 5.49E-30 | 0.352802083  | 0.289 | 0.177 | 1.32E-25 | 1.3 |
| C14orf119 | 5.54E-30 | 0.2538092    | 0.28  | 0.167 | 1.34E-25 | 1.3 |
| MT-CO2    | 5.80E-30 | 0.247992338  | 0.986 | 0.985 | 1.40E-25 | 1.3 |
| STEAP1    | 6.34E-30 | 0.177492743  | 0.091 | 0.033 | 1.53E-25 | 1.3 |
| TXN       | 9.09E-30 | 0.325363222  | 0.771 | 0.685 | 2.19E-25 | 1.3 |
| LRP6      | 9.24E-30 | -0.52505168  | 0.212 | 0.319 | 2.23E-25 | 1.3 |
| ARHGEF28  | 1.11E-29 | -0.679665872 | 0.307 | 0.41  | 2.68E-25 | 1.3 |
| MAML3     | 1.17E-29 | 0.339400887  | 0.33  | 0.212 | 2.83E-25 | 1.3 |
| CALD1     | 1.47E-29 | -0.60065563  | 0.541 | 0.618 | 3.53E-25 | 1.3 |
| RPS3A     | 1.64E-29 | -0.229594145 | 0.941 | 0.956 | 3.95E-25 | 1.3 |
| CCAR1     | 1.69E-29 | 0.298236715  | 0.348 | 0.224 | 4.07E-25 | 1.3 |
| ARHGAP29  | 1.72E-29 | -0.842506375 | 0.425 | 0.503 | 4.14E-25 | 1.3 |
| RLF       | 2.26E-29 | -0.629699966 | 0.275 | 0.374 | 5.46E-25 | 1.3 |
| NEDD4L    | 3.08E-29 | -0.500800902 | 0.485 | 0.569 | 7.44E-25 | 1.3 |
| SQLE      | 3.09E-29 | 0.158438607  | 0.103 | 0.04  | 7.45E-25 | 1.3 |
| ATRNL1    | 3.35E-29 | 0.317631095  | 0.132 | 0.059 | 8.08E-25 | 1.3 |
| SLC34A2   | 3.59E-29 | 0.319644589  | 0.382 | 0.253 | 8.66E-25 | 1.3 |
| TMEM59    | 3.63E-29 | 0.262319392  | 0.442 | 0.305 | 8.75E-25 | 1.3 |
| AC005863. | 3.83E-29 | 0.10934593   | 0.047 | 0.01  | 9.24E-25 | 1.3 |

|           |          |              |       |       |          |     |
|-----------|----------|--------------|-------|-------|----------|-----|
| MGP       | 3.96E-29 | -0.70065932  | 0.831 | 0.881 | 9.55E-25 | 1.3 |
| FAAH2     | 8.29E-29 | 0.313473351  | 0.294 | 0.183 | 2.00E-24 | 1.3 |
| GABRP     | 8.74E-29 | -0.442211348 | 0.487 | 0.571 | 2.11E-24 | 1.3 |
| RNF13     | 1.50E-28 | 0.294501897  | 0.395 | 0.267 | 3.62E-24 | 1.3 |
| GK5       | 1.71E-28 | 0.221123901  | 0.118 | 0.051 | 4.13E-24 | 1.3 |
| ATP5E     | 1.75E-28 | 0.319143858  | 0.555 | 0.427 | 4.21E-24 | 1.3 |
| EPB41L4A  | 1.81E-28 | 0.194194008  | 0.082 | 0.029 | 4.38E-24 | 1.3 |
| KMT2C     | 2.25E-28 | -0.499701512 | 0.58  | 0.626 | 5.43E-24 | 1.3 |
| ZNF385D   | 3.94E-28 | 0.264628239  | 0.116 | 0.049 | 9.49E-24 | 1.3 |
| BACH1     | 4.09E-28 | 0.310513589  | 0.4   | 0.274 | 9.85E-24 | 1.3 |
| SOX5      | 4.85E-28 | 0.243609404  | 0.079 | 0.027 | 1.17E-23 | 1.3 |
| MXD1      | 5.54E-28 | -0.467451957 | 0.091 | 0.184 | 1.33E-23 | 1.3 |
| SERPINE2  | 7.52E-28 | 0.230756824  | 0.097 | 0.038 | 1.81E-23 | 1.3 |
| TNFRSF11B | 7.73E-28 | 0.350721365  | 0.165 | 0.084 | 1.86E-23 | 1.3 |
| S100P     | 7.81E-28 | 0.208182789  | 0.068 | 0.021 | 1.88E-23 | 1.3 |
| C3        | 8.17E-28 | 0.288349239  | 0.399 | 0.271 | 1.97E-23 | 1.3 |
| NSF       | 8.44E-28 | 0.314575652  | 0.229 | 0.133 | 2.04E-23 | 1.3 |
| ANK3      | 8.61E-28 | 0.275956825  | 0.449 | 0.308 | 2.08E-23 | 1.3 |
| RPL24     | 1.01E-27 | -0.23826533  | 0.942 | 0.958 | 2.45E-23 | 1.3 |
| HSD17B12  | 1.02E-27 | 0.314034472  | 0.292 | 0.182 | 2.46E-23 | 1.3 |
| GPRC5A    | 1.80E-27 | -0.802617583 | 0.28  | 0.371 | 4.34E-23 | 1.3 |
| CORO1C    | 1.84E-27 | -0.496661668 | 0.162 | 0.261 | 4.45E-23 | 1.3 |
| RP11-123O | 1.90E-27 | 0.287271034  | 0.299 | 0.188 | 4.57E-23 | 1.3 |
| MYO1B     | 2.08E-27 | 0.306576841  | 0.429 | 0.299 | 5.01E-23 | 1.3 |
| BCL2L1    | 2.12E-27 | 0.22647888   | 0.155 | 0.077 | 5.11E-23 | 1.3 |
| STX12     | 2.31E-27 | -0.566446013 | 0.386 | 0.47  | 5.57E-23 | 1.3 |
| OSMR      | 2.48E-27 | 0.238432761  | 0.482 | 0.337 | 5.99E-23 | 1.3 |
| IRAK2     | 2.52E-27 | 0.300457031  | 0.21  | 0.118 | 6.08E-23 | 1.3 |
| WFDC3     | 2.73E-27 | 0.198182593  | 0.165 | 0.083 | 6.59E-23 | 1.3 |
| FAM177B   | 4.49E-27 | 0.355165897  | 0.757 | 0.603 | 1.08E-22 | 1.3 |
| LRRC16A   | 4.54E-27 | 0.300279987  | 0.253 | 0.152 | 1.09E-22 | 1.3 |
| PDSS2     | 4.69E-27 | 0.262159153  | 0.204 | 0.114 | 1.13E-22 | 1.3 |
| MT-CO3    | 5.86E-27 | 0.182599153  | 0.992 | 0.995 | 1.41E-22 | 1.3 |
| HELB      | 6.98E-27 | 0.259180673  | 0.186 | 0.1   | 1.68E-22 | 1.3 |
| RBM3      | 8.73E-27 | -0.431172512 | 0.446 | 0.523 | 2.10E-22 | 1.3 |
| NPM1      | 8.79E-27 | -0.294542847 | 0.902 | 0.915 | 2.12E-22 | 1.3 |
| PSMA4     | 9.03E-27 | 0.40395165   | 0.589 | 0.472 | 2.18E-22 | 1.3 |
| PTPRG     | 1.11E-26 | 0.354320577  | 0.31  | 0.201 | 2.69E-22 | 1.3 |
| PGK1      | 1.15E-26 | 0.33781398   | 0.734 | 0.624 | 2.78E-22 | 1.3 |
| THRB      | 1.15E-26 | 0.246615869  | 0.392 | 0.265 | 2.78E-22 | 1.3 |
| OTUD6B-A  | 1.29E-26 | 0.233967894  | 0.279 | 0.171 | 3.12E-22 | 1.3 |
| NOCT      | 1.45E-26 | -0.397392632 | 0.075 | 0.16  | 3.50E-22 | 1.3 |
| LRBA      | 1.57E-26 | 0.284202853  | 0.569 | 0.425 | 3.79E-22 | 1.3 |
| TNS3      | 1.61E-26 | 0.279769098  | 0.132 | 0.063 | 3.88E-22 | 1.3 |
| CADPS2    | 1.86E-26 | 0.276916137  | 0.407 | 0.278 | 4.49E-22 | 1.3 |
| FAM3C     | 2.08E-26 | 0.280629131  | 0.227 | 0.133 | 5.03E-22 | 1.3 |
| RPS6      | 2.24E-26 | -0.17896937  | 0.979 | 0.986 | 5.40E-22 | 1.3 |

|          |          |              |       |       |          |     |
|----------|----------|--------------|-------|-------|----------|-----|
| HSBP1    | 2.25E-26 | 0.255409211  | 0.584 | 0.449 | 5.42E-22 | 1.3 |
| TTC1     | 2.43E-26 | 0.277666868  | 0.42  | 0.296 | 5.85E-22 | 1.3 |
| RCAN1    | 2.87E-26 | 0.244378068  | 0.755 | 0.632 | 6.92E-22 | 1.3 |
| TMCO1    | 2.89E-26 | 0.271544817  | 0.422 | 0.298 | 6.96E-22 | 1.3 |
| UBASH3B  | 3.05E-26 | 0.251324437  | 0.11  | 0.047 | 7.35E-22 | 1.3 |
| MRPL33   | 3.19E-26 | 0.261103325  | 0.53  | 0.395 | 7.70E-22 | 1.3 |
| RPL21    | 3.30E-26 | -0.223238281 | 0.948 | 0.962 | 7.96E-22 | 1.3 |
| ASS1     | 3.48E-26 | 0.302368142  | 0.23  | 0.136 | 8.39E-22 | 1.3 |
| RRAS2    | 4.12E-26 | 0.279019797  | 0.309 | 0.197 | 9.94E-22 | 1.3 |
| RPL35A   | 4.43E-26 | -0.228895499 | 0.975 | 0.983 | 1.07E-21 | 1.3 |
| GALNT15  | 6.64E-26 | 0.455446108  | 0.209 | 0.121 | 1.60E-21 | 1.3 |
| PSMB5    | 8.52E-26 | 0.260082644  | 0.315 | 0.205 | 2.06E-21 | 1.3 |
| RNASE1   | 9.59E-26 | 0.243970911  | 0.078 | 0.028 | 2.31E-21 | 1.3 |
| PRKD1    | 9.96E-26 | 0.312244337  | 0.232 | 0.139 | 2.40E-21 | 1.3 |
| PPM1H    | 1.02E-25 | 0.24913055   | 0.481 | 0.345 | 2.45E-21 | 1.3 |
| ZBTB20   | 1.16E-25 | 0.273278687  | 0.586 | 0.446 | 2.81E-21 | 1.3 |
| HTATIP2  | 1.17E-25 | 0.205743774  | 0.161 | 0.084 | 2.82E-21 | 1.3 |
| XKR6     | 1.36E-25 | 0.291926894  | 0.245 | 0.149 | 3.28E-21 | 1.3 |
| TPI1     | 2.19E-25 | 0.282913233  | 0.467 | 0.339 | 5.28E-21 | 1.3 |
| PFDN5    | 3.09E-25 | -0.264400903 | 0.888 | 0.901 | 7.45E-21 | 1.3 |
| MAN1A1   | 3.09E-25 | 0.25551151   | 0.205 | 0.116 | 7.46E-21 | 1.3 |
| UGP2     | 3.95E-25 | 0.253776068  | 0.627 | 0.489 | 9.54E-21 | 1.3 |
| PPP2CB   | 4.08E-25 | -0.47476335  | 0.239 | 0.332 | 9.84E-21 | 1.3 |
| ATF7IP   | 4.35E-25 | 0.253207279  | 0.247 | 0.149 | 1.05E-20 | 1.3 |
| TXNDC9   | 4.72E-25 | 0.254113164  | 0.215 | 0.124 | 1.14E-20 | 1.3 |
| CDK14    | 5.05E-25 | 0.280131351  | 0.498 | 0.371 | 1.22E-20 | 1.3 |
| UQCR10   | 5.66E-25 | 0.26137702   | 0.493 | 0.369 | 1.36E-20 | 1.3 |
| KITLG    | 5.94E-25 | 0.143268173  | 0.055 | 0.016 | 1.43E-20 | 1.3 |
| MT-ND1   | 6.17E-25 | 0.245818331  | 0.977 | 0.971 | 1.49E-20 | 1.3 |
| RABGAP1L | 6.55E-25 | 0.316199848  | 0.306 | 0.2   | 1.58E-20 | 1.3 |
| PTGR1    | 7.87E-25 | 0.257400687  | 0.343 | 0.231 | 1.90E-20 | 1.3 |
| FKBP5    | 8.74E-25 | 0.302250792  | 0.37  | 0.252 | 2.11E-20 | 1.3 |
| HDAC9    | 8.94E-25 | 0.261147679  | 0.318 | 0.206 | 2.16E-20 | 1.3 |
| NACA     | 1.10E-24 | -0.22044048  | 0.951 | 0.967 | 2.65E-20 | 1.3 |
| ETV6     | 1.12E-24 | -0.362435658 | 0.648 | 0.689 | 2.69E-20 | 1.3 |
| HMGB1    | 1.21E-24 | 0.268788052  | 0.63  | 0.509 | 2.92E-20 | 1.3 |
| NMT1     | 1.26E-24 | 0.254813204  | 0.267 | 0.165 | 3.03E-20 | 1.3 |
| MAGED1   | 1.39E-24 | 0.249664262  | 0.166 | 0.089 | 3.36E-20 | 1.3 |
| ARHGAP32 | 1.45E-24 | 0.256190682  | 0.368 | 0.249 | 3.51E-20 | 1.3 |
| EIF3E    | 2.28E-24 | -0.32190458  | 0.784 | 0.803 | 5.51E-20 | 1.3 |
| CD2AP    | 2.47E-24 | -0.534872947 | 0.319 | 0.407 | 5.95E-20 | 1.3 |
| PLEKHA7  | 2.60E-24 | -0.155772075 | 0.977 | 0.987 | 6.27E-20 | 1.3 |
| PSMC1    | 5.04E-24 | 0.305047401  | 0.45  | 0.333 | 1.21E-19 | 1.3 |
| VPS25    | 5.83E-24 | 0.205590431  | 0.19  | 0.107 | 1.41E-19 | 1.3 |
| SMC1A    | 7.01E-24 | 0.184838802  | 0.129 | 0.062 | 1.69E-19 | 1.3 |
| PSMB7    | 9.67E-24 | 0.327111818  | 0.659 | 0.557 | 2.33E-19 | 1.3 |
| PLEKHA5  | 9.75E-24 | 0.259130089  | 0.521 | 0.386 | 2.35E-19 | 1.3 |

|           |          |              |       |       |          |     |
|-----------|----------|--------------|-------|-------|----------|-----|
| NAV2      | 1.00E-23 | -0.556741169 | 0.367 | 0.46  | 2.41E-19 | 1.3 |
| PTPN2     | 1.05E-23 | 0.231040279  | 0.473 | 0.339 | 2.53E-19 | 1.3 |
| INSIG1    | 1.06E-23 | 0.214059663  | 0.164 | 0.088 | 2.56E-19 | 1.3 |
| SPDYE2    | 1.37E-23 | 0.226461156  | 0.263 | 0.165 | 3.31E-19 | 1.3 |
| INSR      | 1.44E-23 | -0.396397243 | 0.607 | 0.666 | 3.48E-19 | 1.3 |
| TKT       | 1.55E-23 | 0.247233854  | 0.197 | 0.114 | 3.75E-19 | 1.3 |
| SLC47A1   | 1.76E-23 | -0.202655504 | 0.933 | 0.951 | 4.23E-19 | 1.3 |
| CDC42BPA  | 2.12E-23 | 0.278820435  | 0.371 | 0.258 | 5.12E-19 | 1.3 |
| KIZ-AS1   | 2.23E-23 | -0.310600282 | 0.866 | 0.899 | 5.38E-19 | 1.3 |
| SSBP1     | 2.25E-23 | 0.31422255   | 0.532 | 0.412 | 5.44E-19 | 1.3 |
| ANO10     | 2.34E-23 | 0.257798365  | 0.314 | 0.208 | 5.64E-19 | 1.3 |
| PCNXL4    | 2.59E-23 | 0.208257943  | 0.155 | 0.082 | 6.25E-19 | 1.3 |
| CXCL6     | 2.93E-23 | 0.25911732   | 0.072 | 0.026 | 7.05E-19 | 1.3 |
| MTHFD2L   | 2.99E-23 | 0.177150197  | 0.721 | 0.58  | 7.20E-19 | 1.3 |
| MRPL50    | 3.07E-23 | 0.181100754  | 0.199 | 0.114 | 7.40E-19 | 1.3 |
| MMADHC    | 3.78E-23 | 0.238689417  | 0.466 | 0.344 | 9.12E-19 | 1.3 |
| CTDSPL    | 3.85E-23 | 0.174762096  | 0.107 | 0.048 | 9.29E-19 | 1.3 |
| CLUU1OS   | 3.86E-23 | 0.232390906  | 0.141 | 0.073 | 9.31E-19 | 1.3 |
| MEF2A     | 4.62E-23 | -0.516735764 | 0.325 | 0.409 | 1.11E-18 | 1.3 |
| N4BP2L2   | 4.74E-23 | 0.202582545  | 0.825 | 0.689 | 1.14E-18 | 1.3 |
| ARID5B    | 5.06E-23 | -0.429973651 | 0.726 | 0.752 | 1.22E-18 | 1.3 |
| ANXA7     | 5.18E-23 | 0.245153135  | 0.378 | 0.266 | 1.25E-18 | 1.3 |
| ABRACL    | 5.27E-23 | 0.257212596  | 0.474 | 0.355 | 1.27E-18 | 1.3 |
| ENOSF1    | 5.49E-23 | 0.242434743  | 0.297 | 0.195 | 1.32E-18 | 1.3 |
| LINC01191 | 5.65E-23 | 0.197595288  | 0.098 | 0.042 | 1.36E-18 | 1.3 |
| PSMC5     | 5.93E-23 | 0.173867169  | 0.156 | 0.082 | 1.43E-18 | 1.3 |
| CTSC      | 6.06E-23 | 0.162104947  | 0.096 | 0.041 | 1.46E-18 | 1.3 |
| HIST1H2BJ | 6.52E-23 | 0.21350971   | 0.144 | 0.074 | 1.57E-18 | 1.3 |
| SNX24     | 7.14E-23 | 0.261685212  | 0.279 | 0.182 | 1.72E-18 | 1.3 |
| PSMD11    | 7.36E-23 | 0.274052919  | 0.386 | 0.273 | 1.77E-18 | 1.3 |
| ITPR2     | 7.83E-23 | 0.215613012  | 0.642 | 0.511 | 1.89E-18 | 1.3 |
| STEAP1B   | 8.68E-23 | -0.345455959 | 0.944 | 0.957 | 2.09E-18 | 1.3 |
| RBFOX2    | 9.14E-23 | -0.307407979 | 0.956 | 0.966 | 2.20E-18 | 1.3 |
| CTD-2015G | 9.24E-23 | 0.218707138  | 0.251 | 0.157 | 2.23E-18 | 1.3 |
| PTPRJ     | 9.60E-23 | -0.476727917 | 0.256 | 0.345 | 2.31E-18 | 1.3 |
| SLC6A14   | 9.81E-23 | 0.299444877  | 0.287 | 0.187 | 2.37E-18 | 1.3 |
| DHX32     | 1.01E-22 | 0.26265564   | 0.293 | 0.194 | 2.43E-18 | 1.3 |
| ARRDC3    | 1.08E-22 | 0.195355523  | 0.737 | 0.62  | 2.60E-18 | 1.3 |
| OLMALINC  | 1.09E-22 | 0.150614803  | 0.077 | 0.029 | 2.63E-18 | 1.3 |
| SRSF5     | 1.13E-22 | 0.239359103  | 0.408 | 0.29  | 2.72E-18 | 1.3 |
| RNF19A    | 1.23E-22 | -0.497544765 | 0.582 | 0.639 | 2.96E-18 | 1.3 |
| NIN       | 1.37E-22 | 0.212554604  | 0.156 | 0.085 | 3.31E-18 | 1.3 |
| GTF2H5    | 1.50E-22 | 0.240752126  | 0.3   | 0.199 | 3.62E-18 | 1.3 |
| UBL5      | 1.67E-22 | 0.258051695  | 0.466 | 0.349 | 4.02E-18 | 1.3 |
| KNOP1     | 1.83E-22 | 0.214503119  | 0.232 | 0.142 | 4.42E-18 | 1.3 |
| ZNF521    | 2.38E-22 | 0.216806233  | 0.254 | 0.16  | 5.74E-18 | 1.3 |
| RIOK3     | 2.44E-22 | -0.455200255 | 0.232 | 0.32  | 5.88E-18 | 1.3 |

|           |          |              |       |       |          |     |
|-----------|----------|--------------|-------|-------|----------|-----|
| RUNX1     | 2.60E-22 | 0.228590458  | 0.666 | 0.529 | 6.27E-18 | 1.3 |
| SLC6A9    | 2.80E-22 | 0.114289724  | 0.046 | 0.012 | 6.74E-18 | 1.3 |
| SYTL2     | 2.87E-22 | 0.249514324  | 0.205 | 0.122 | 6.92E-18 | 1.3 |
| ANKS1B    | 2.94E-22 | 0.247002084  | 0.356 | 0.243 | 7.10E-18 | 1.3 |
| PLEKHA6   | 3.01E-22 | -0.223082745 | 0.916 | 0.926 | 7.25E-18 | 1.3 |
| SRP9      | 3.12E-22 | 0.238539478  | 0.502 | 0.377 | 7.52E-18 | 1.3 |
| CAMKMT    | 3.19E-22 | 0.265952622  | 0.227 | 0.14  | 7.69E-18 | 1.3 |
| NUP153    | 3.19E-22 | -0.44632724  | 0.205 | 0.293 | 7.69E-18 | 1.3 |
| ACSS2     | 3.63E-22 | 0.23845196   | 0.248 | 0.155 | 8.75E-18 | 1.3 |
| ROPN1B    | 3.76E-22 | -0.383979989 | 0.077 | 0.151 | 9.06E-18 | 1.3 |
| TMEM87B   | 4.54E-22 | 0.215895008  | 0.137 | 0.07  | 1.09E-17 | 1.3 |
| XRCC5     | 4.75E-22 | 0.256778137  | 0.44  | 0.324 | 1.14E-17 | 1.3 |
| KIAA0922  | 7.46E-22 | -0.666673823 | 0.197 | 0.283 | 1.80E-17 | 1.3 |
| TLDC1     | 7.59E-22 | 0.186984327  | 0.16  | 0.088 | 1.83E-17 | 1.3 |
| THSD4     | 8.58E-22 | 0.322297788  | 0.503 | 0.386 | 2.07E-17 | 1.3 |
| CASC15    | 8.63E-22 | -0.538401287 | 0.282 | 0.378 | 2.08E-17 | 1.3 |
| DHRS7     | 9.61E-22 | 0.166117589  | 0.096 | 0.043 | 2.32E-17 | 1.3 |
| CDC26     | 1.14E-21 | 0.212927052  | 0.296 | 0.196 | 2.76E-17 | 1.3 |
| TLN2      | 1.29E-21 | 0.27911507   | 0.157 | 0.087 | 3.11E-17 | 1.3 |
| IGFBP5    | 1.35E-21 | 0.27889292   | 0.107 | 0.051 | 3.25E-17 | 1.3 |
| TMEM167A  | 1.39E-21 | 0.257308011  | 0.345 | 0.24  | 3.34E-17 | 1.3 |
| CYB5R2    | 1.52E-21 | 0.159206891  | 0.103 | 0.048 | 3.66E-17 | 1.3 |
| PPP2R2A   | 1.61E-21 | -0.440192639 | 0.355 | 0.429 | 3.87E-17 | 1.3 |
| ILF2      | 1.76E-21 | -0.41851023  | 0.518 | 0.577 | 4.24E-17 | 1.3 |
| RPL38     | 2.13E-21 | -0.211545222 | 0.926 | 0.929 | 5.13E-17 | 1.3 |
| RAB11FIP1 | 2.31E-21 | -0.514051978 | 0.469 | 0.532 | 5.57E-17 | 1.3 |
| AC026202  | 2.42E-21 | -0.402001254 | 0.132 | 0.218 | 5.82E-17 | 1.3 |
| DDX21     | 2.43E-21 | -0.471662268 | 0.599 | 0.635 | 5.85E-17 | 1.3 |
| DAZAP2    | 2.60E-21 | 0.223218336  | 0.461 | 0.345 | 6.27E-17 | 1.3 |
| SSH2      | 2.82E-21 | 0.26745181   | 0.425 | 0.309 | 6.80E-17 | 1.3 |
| ANKRD36   | 3.00E-21 | 0.281542104  | 0.204 | 0.123 | 7.23E-17 | 1.3 |
| LINC00511 | 3.09E-21 | 0.237943279  | 0.177 | 0.101 | 7.44E-17 | 1.3 |
| ARHGAP17  | 3.10E-21 | -0.437730853 | 0.156 | 0.239 | 7.48E-17 | 1.3 |
| VPS13D    | 3.15E-21 | 0.231391972  | 0.414 | 0.296 | 7.60E-17 | 1.3 |
| EPRS      | 3.26E-21 | 0.198475608  | 0.215 | 0.13  | 7.87E-17 | 1.3 |
| LINC00693 | 3.29E-21 | 0.15546337   | 0.054 | 0.017 | 7.92E-17 | 1.3 |
| FAM134B   | 3.95E-21 | 0.280872654  | 0.212 | 0.13  | 9.52E-17 | 1.3 |
| SEC24D    | 3.99E-21 | -0.457454688 | 0.234 | 0.321 | 9.63E-17 | 1.3 |
| SERGEF    | 4.07E-21 | 0.136260309  | 0.067 | 0.025 | 9.81E-17 | 1.3 |
| PSMD1     | 4.43E-21 | 0.216383232  | 0.202 | 0.121 | 1.07E-16 | 1.3 |
| LINC00152 | 4.48E-21 | -0.589003808 | 0.289 | 0.362 | 1.08E-16 | 1.3 |
| GNE       | 4.58E-21 | 0.242146645  | 0.244 | 0.155 | 1.10E-16 | 1.3 |
| ESYT2     | 4.73E-21 | -0.47129167  | 0.463 | 0.528 | 1.14E-16 | 1.3 |
| FNBP1L    | 5.56E-21 | -0.493515254 | 0.38  | 0.453 | 1.34E-16 | 1.3 |
| HSD17B7   | 5.62E-21 | 0.244946426  | 0.17  | 0.097 | 1.36E-16 | 1.3 |
| RP11-314N | 6.17E-21 | -0.449815339 | 0.089 | 0.166 | 1.49E-16 | 1.3 |
| JMJD1C    | 6.95E-21 | -0.365480209 | 0.648 | 0.689 | 1.68E-16 | 1.3 |



|           |          |              |       |       |          |     |
|-----------|----------|--------------|-------|-------|----------|-----|
| SHFM1     | 6.98E-21 | 0.24551159   | 0.706 | 0.602 | 1.68E-16 | 1.3 |
| CHCHD7    | 7.10E-21 | 0.16904946   | 0.118 | 0.058 | 1.71E-16 | 1.3 |
| MECOM     | 7.51E-21 | -0.251187209 | 0.883 | 0.89  | 1.81E-16 | 1.3 |
| UBAC2     | 7.59E-21 | 0.231428004  | 0.284 | 0.19  | 1.83E-16 | 1.3 |
| MACC1     | 7.67E-21 | -0.568071056 | 0.342 | 0.425 | 1.85E-16 | 1.3 |
| CNIH4     | 7.74E-21 | 0.212863872  | 0.472 | 0.351 | 1.87E-16 | 1.3 |
| AC159540. | 8.00E-21 | 0.282713829  | 0.241 | 0.152 | 1.93E-16 | 1.3 |
| RAP1GAP2  | 8.35E-21 | 0.284813927  | 0.231 | 0.146 | 2.01E-16 | 1.3 |
| ZNF33A    | 8.62E-21 | 0.228489905  | 0.326 | 0.223 | 2.08E-16 | 1.3 |
| ELOVL6    | 1.16E-20 | 0.200766795  | 0.13  | 0.067 | 2.80E-16 | 1.3 |
| ATF3      | 1.21E-20 | -0.533907837 | 0.283 | 0.365 | 2.92E-16 | 1.3 |
| ELL2      | 1.22E-20 | -0.321065063 | 0.645 | 0.694 | 2.94E-16 | 1.3 |
| CCDC91    | 1.22E-20 | 0.209019304  | 0.443 | 0.326 | 2.94E-16 | 1.3 |
| TMSB10    | 1.54E-20 | 0.301592132  | 0.695 | 0.604 | 3.72E-16 | 1.3 |
| KIAA1551  | 1.56E-20 | 0.199356039  | 0.192 | 0.113 | 3.76E-16 | 1.3 |
| COMMD10   | 1.71E-20 | 0.252594499  | 0.281 | 0.186 | 4.12E-16 | 1.3 |
| CCT5      | 1.88E-20 | 0.250123582  | 0.462 | 0.346 | 4.54E-16 | 1.3 |
| DOCK5     | 2.06E-20 | 0.239550901  | 0.292 | 0.194 | 4.96E-16 | 1.3 |
| COX20     | 2.29E-20 | 0.174950525  | 0.165 | 0.093 | 5.53E-16 | 1.3 |
| AGFG1     | 2.33E-20 | -0.41328613  | 0.348 | 0.43  | 5.61E-16 | 1.3 |
| STIM1     | 2.37E-20 | 0.207001522  | 0.279 | 0.183 | 5.71E-16 | 1.3 |
| CNTNAP3B  | 2.37E-20 | 0.193275615  | 0.167 | 0.095 | 5.73E-16 | 1.3 |
| SCNN1A    | 2.43E-20 | 0.185397878  | 0.121 | 0.061 | 5.86E-16 | 1.3 |
| QKI       | 2.44E-20 | -0.463489526 | 0.492 | 0.551 | 5.89E-16 | 1.3 |
| CAPZA1    | 2.66E-20 | 0.227833896  | 0.535 | 0.416 | 6.41E-16 | 1.3 |
| PHF21A    | 2.67E-20 | 0.256521131  | 0.317 | 0.22  | 6.43E-16 | 1.3 |
| JKAMP     | 2.72E-20 | 0.195591937  | 0.129 | 0.067 | 6.55E-16 | 1.3 |
| MAPK14    | 3.09E-20 | 0.227034024  | 0.244 | 0.156 | 7.45E-16 | 1.3 |
| METTL17   | 3.20E-20 | -0.250915244 | 0.024 | 0.078 | 7.72E-16 | 1.3 |
| RSL1D1    | 3.27E-20 | -0.375406034 | 0.603 | 0.639 | 7.88E-16 | 1.3 |
| RPL11     | 3.29E-20 | -0.188448421 | 0.972 | 0.983 | 7.94E-16 | 1.3 |
| ORMDL2    | 3.44E-20 | 0.200235675  | 0.226 | 0.142 | 8.29E-16 | 1.3 |
| BRK1      | 3.72E-20 | 0.230641974  | 0.761 | 0.668 | 8.97E-16 | 1.3 |
| SOX10     | 3.99E-20 | 0.225687463  | 0.184 | 0.109 | 9.62E-16 | 1.3 |
| SAMD12    | 4.27E-20 | 0.227888449  | 0.341 | 0.236 | 1.03E-15 | 1.3 |
| ROPN1     | 4.46E-20 | -0.245099289 | 0.026 | 0.081 | 1.07E-15 | 1.3 |
| OSBPL3    | 4.77E-20 | 0.179441681  | 0.101 | 0.048 | 1.15E-15 | 1.3 |
| LIMCH1    | 4.82E-20 | 0.222660113  | 0.348 | 0.241 | 1.16E-15 | 1.3 |
| ST6GALNAI | 5.16E-20 | 0.243858239  | 0.476 | 0.358 | 1.24E-15 | 1.3 |
| PDIA6     | 5.33E-20 | -0.440584394 | 0.186 | 0.266 | 1.29E-15 | 1.3 |
| AGAP1     | 5.81E-20 | 0.169638121  | 0.72  | 0.583 | 1.40E-15 | 1.3 |
| SGPP2     | 6.44E-20 | 0.22376845   | 0.259 | 0.169 | 1.55E-15 | 1.3 |
| MFGE8     | 6.46E-20 | 0.378819814  | 0.252 | 0.166 | 1.56E-15 | 1.3 |
| CFL1      | 7.41E-20 | 0.298122711  | 0.315 | 0.219 | 1.79E-15 | 1.3 |
| PSMD7     | 8.04E-20 | 0.196732634  | 0.209 | 0.129 | 1.94E-15 | 1.3 |
| MTIF3     | 8.11E-20 | 0.23565662   | 0.316 | 0.218 | 1.96E-15 | 1.3 |
| RAD23B    | 9.19E-20 | -0.471166931 | 0.371 | 0.437 | 2.22E-15 | 1.3 |

|          |          |              |       |       |          |     |
|----------|----------|--------------|-------|-------|----------|-----|
| SCMH1    | 9.82E-20 | 0.263440645  | 0.287 | 0.192 | 2.37E-15 | 1.3 |
| ST6GAL1  | 1.14E-19 | 0.230848664  | 0.422 | 0.308 | 2.75E-15 | 1.3 |
| HDAC8    | 1.35E-19 | 0.233537113  | 0.3   | 0.202 | 3.25E-15 | 1.3 |
| SEMA4B   | 1.40E-19 | 0.250403674  | 0.225 | 0.144 | 3.37E-15 | 1.3 |
| ERH      | 1.45E-19 | 0.193298111  | 0.658 | 0.535 | 3.49E-15 | 1.3 |
| DOCK7    | 1.66E-19 | 0.223772515  | 0.316 | 0.219 | 4.00E-15 | 1.3 |
| IFITM3   | 1.73E-19 | 0.272780655  | 0.328 | 0.229 | 4.18E-15 | 1.3 |
| FANCC    | 2.09E-19 | 0.198817177  | 0.185 | 0.11  | 5.05E-15 | 1.3 |
| RPL32    | 2.11E-19 | -0.197379169 | 0.979 | 0.987 | 5.08E-15 | 1.3 |
| RIN2     | 2.13E-19 | 0.234441866  | 0.392 | 0.284 | 5.14E-15 | 1.3 |
| TCF12    | 2.13E-19 | 0.210509323  | 0.587 | 0.467 | 5.15E-15 | 1.3 |
| OOEP     | 2.41E-19 | -0.172668397 | 0.972 | 0.984 | 5.82E-15 | 1.3 |
| TBC1D4   | 2.52E-19 | 0.251853122  | 0.2   | 0.123 | 6.07E-15 | 1.3 |
| ATG5     | 2.53E-19 | 0.1769987    | 0.163 | 0.094 | 6.11E-15 | 1.3 |
| NEAT1    | 2.83E-19 | 0.147143023  | 0.993 | 0.955 | 6.82E-15 | 1.3 |
| PSMB2    | 2.98E-19 | 0.208049058  | 0.195 | 0.12  | 7.18E-15 | 1.3 |
| MITD1    | 3.00E-19 | 0.193566135  | 0.168 | 0.098 | 7.23E-15 | 1.3 |
| SERPINB3 | 3.13E-19 | 0.322505831  | 0.129 | 0.069 | 7.54E-15 | 1.3 |
| DENND2D  | 3.13E-19 | 0.196521367  | 0.19  | 0.116 | 7.56E-15 | 1.3 |
| UBE2L3   | 3.17E-19 | 0.243624581  | 0.537 | 0.426 | 7.64E-15 | 1.3 |
| PDCD10   | 3.45E-19 | 0.212744163  | 0.368 | 0.26  | 8.32E-15 | 1.3 |
| ITFG1    | 3.58E-19 | 0.261566863  | 0.316 | 0.221 | 8.64E-15 | 1.3 |
| ENO1     | 3.62E-19 | 0.373825544  | 0.596 | 0.488 | 8.72E-15 | 1.3 |
| PRICKLE1 | 4.42E-19 | 0.175074385  | 0.155 | 0.087 | 1.06E-14 | 1.3 |
| FBXO2    | 4.64E-19 | 0.115506865  | 0.049 | 0.016 | 1.12E-14 | 1.3 |
| HMGCR    | 5.64E-19 | 0.166732357  | 0.104 | 0.05  | 1.36E-14 | 1.3 |
| S100A8   | 6.02E-19 | 0.198430362  | 0.282 | 0.194 | 1.45E-14 | 1.3 |
| VNN3     | 6.34E-19 | 0.218746866  | 0.351 | 0.244 | 1.53E-14 | 1.3 |
| PDE7A    | 6.42E-19 | 0.232429549  | 0.339 | 0.238 | 1.55E-14 | 1.3 |
| MAST4    | 6.56E-19 | 0.153032422  | 0.475 | 0.352 | 1.58E-14 | 1.3 |
| YTHDC1   | 6.73E-19 | -0.391073264 | 0.222 | 0.303 | 1.62E-14 | 1.3 |
| IGF2BP2  | 7.79E-19 | -0.512821312 | 0.473 | 0.524 | 1.88E-14 | 1.3 |
| SLC25A3  | 7.85E-19 | 0.185517908  | 0.263 | 0.174 | 1.89E-14 | 1.3 |
| EIF4A2   | 7.91E-19 | -0.271884274 | 0.788 | 0.822 | 1.91E-14 | 1.3 |
| BTAF1    | 8.05E-19 | -0.386094333 | 0.186 | 0.268 | 1.94E-14 | 1.3 |
| TCEB1    | 9.04E-19 | 0.19714182   | 0.375 | 0.268 | 2.18E-14 | 1.3 |
| SUB1     | 9.58E-19 | 0.226062656  | 0.809 | 0.735 | 2.31E-14 | 1.3 |
| LDLRAD4  | 9.94E-19 | 0.271459248  | 0.237 | 0.153 | 2.40E-14 | 1.3 |
| SLC11A2  | 1.09E-18 | 0.207687965  | 0.518 | 0.399 | 2.64E-14 | 1.3 |
| RAPGEF2  | 1.13E-18 | -0.464725986 | 0.355 | 0.425 | 2.73E-14 | 1.3 |
| AFTPH    | 1.17E-18 | -0.408657759 | 0.258 | 0.335 | 2.83E-14 | 1.3 |
| CCT3     | 1.19E-18 | 0.204589015  | 0.529 | 0.411 | 2.88E-14 | 1.3 |
| USP54    | 1.23E-18 | -0.467703488 | 0.471 | 0.528 | 2.98E-14 | 1.3 |
| FAM213A  | 1.27E-18 | 0.174806877  | 0.122 | 0.064 | 3.05E-14 | 1.3 |
| C2orf88  | 1.31E-18 | -0.393457604 | 0.33  | 0.406 | 3.15E-14 | 1.3 |
| ZBTB8OS  | 1.33E-18 | 0.186862289  | 0.194 | 0.119 | 3.21E-14 | 1.3 |
| SPATA5   | 1.42E-18 | 0.189912697  | 0.191 | 0.116 | 3.42E-14 | 1.3 |

|           |          |              |       |       |          |     |
|-----------|----------|--------------|-------|-------|----------|-----|
| UBE2V2    | 1.46E-18 | 0.189212405  | 0.368 | 0.263 | 3.52E-14 | 1.3 |
| RTTN      | 1.47E-18 | 0.185417854  | 0.107 | 0.054 | 3.54E-14 | 1.3 |
| ATG7      | 1.62E-18 | 0.212309958  | 0.291 | 0.198 | 3.91E-14 | 1.3 |
| C15orf52  | 1.72E-18 | 0.137595582  | 0.079 | 0.035 | 4.15E-14 | 1.3 |
| MIR4435-2 | 1.84E-18 | -0.52541931  | 0.444 | 0.499 | 4.44E-14 | 1.3 |
| ATP6V1E1  | 2.10E-18 | 0.23465898   | 0.352 | 0.254 | 5.07E-14 | 1.3 |
| APBB2     | 2.13E-18 | 0.21102825   | 0.156 | 0.09  | 5.14E-14 | 1.3 |
| GLUL      | 2.15E-18 | 0.182625116  | 0.408 | 0.296 | 5.19E-14 | 1.3 |
| TIMP1     | 2.28E-18 | 0.178454661  | 0.096 | 0.046 | 5.49E-14 | 1.3 |
| SEMA6A    | 2.39E-18 | 0.26217075   | 0.503 | 0.384 | 5.76E-14 | 1.3 |
| STARD13   | 2.52E-18 | 0.157370416  | 0.27  | 0.18  | 6.08E-14 | 1.3 |
| PSAT1     | 2.62E-18 | 0.104578553  | 0.046 | 0.015 | 6.32E-14 | 1.3 |
| PERP      | 2.82E-18 | 0.22849749   | 0.406 | 0.302 | 6.80E-14 | 1.3 |
| FTH1      | 3.06E-18 | 0.281167546  | 0.915 | 0.86  | 7.37E-14 | 1.3 |
| SNRNP35   | 3.13E-18 | 0.166677053  | 0.125 | 0.067 | 7.54E-14 | 1.3 |
| ANKRD36B  | 3.16E-18 | 0.232731106  | 0.169 | 0.1   | 7.61E-14 | 1.3 |
| FMN1      | 3.42E-18 | 0.203093938  | 0.228 | 0.148 | 8.26E-14 | 1.3 |
| EPB41L1   | 3.54E-18 | 0.194977941  | 0.152 | 0.087 | 8.53E-14 | 1.3 |
| ADARB1    | 3.68E-18 | 0.163237406  | 0.095 | 0.046 | 8.88E-14 | 1.3 |
| INVS      | 3.87E-18 | 0.213974526  | 0.187 | 0.115 | 9.34E-14 | 1.3 |
| CD9       | 4.02E-18 | 0.244967275  | 0.325 | 0.231 | 9.69E-14 | 1.3 |
| SDCBP     | 4.03E-18 | 0.280942558  | 0.779 | 0.694 | 9.73E-14 | 1.3 |
| RP11-903H | 4.15E-18 | 0.12677677   | 0.042 | 0.012 | 1.00E-13 | 1.3 |
| ZNF608    | 4.16E-18 | 0.219887163  | 0.225 | 0.145 | 1.00E-13 | 1.3 |
| CEBPZOS   | 4.19E-18 | 0.203518458  | 0.199 | 0.124 | 1.01E-13 | 1.3 |
| UAP1      | 4.30E-18 | 0.242416886  | 0.311 | 0.218 | 1.04E-13 | 1.3 |
| HK2       | 4.65E-18 | -0.389895244 | 0.117 | 0.19  | 1.12E-13 | 1.3 |
| NPEPPS    | 4.72E-18 | -0.499591869 | 0.405 | 0.469 | 1.14E-13 | 1.3 |
| HIP1      | 4.90E-18 | 0.202195983  | 0.137 | 0.076 | 1.18E-13 | 1.3 |
| FAM208A   | 5.20E-18 | 0.160576949  | 0.111 | 0.058 | 1.25E-13 | 1.3 |
| VMP1      | 5.23E-18 | 0.217684031  | 0.838 | 0.759 | 1.26E-13 | 1.3 |
| DNMBP     | 5.43E-18 | 0.136346415  | 0.068 | 0.028 | 1.31E-13 | 1.3 |
| CASC4     | 5.70E-18 | 0.204181966  | 0.248 | 0.163 | 1.38E-13 | 1.3 |
| MT-ND6    | 6.27E-18 | 0.181829377  | 0.221 | 0.142 | 1.51E-13 | 1.3 |
| SLMAP     | 6.28E-18 | -0.339277009 | 0.594 | 0.643 | 1.51E-13 | 1.3 |
| PPP1R13B  | 6.30E-18 | 0.218455933  | 0.187 | 0.115 | 1.52E-13 | 1.3 |
| S100A9    | 6.44E-18 | 0.438499658  | 0.107 | 0.055 | 1.55E-13 | 1.3 |
| PRIM2     | 6.92E-18 | 0.230813322  | 0.119 | 0.063 | 1.67E-13 | 1.3 |
| C5orf46   | 7.02E-18 | 0.213420531  | 0.298 | 0.207 | 1.69E-13 | 1.3 |
| HSDL2     | 7.81E-18 | 0.176075145  | 0.155 | 0.09  | 1.88E-13 | 1.3 |
| RSRC2     | 8.44E-18 | -0.424477983 | 0.581 | 0.611 | 2.03E-13 | 1.3 |
| PARD3B    | 8.64E-18 | 0.195582791  | 0.186 | 0.113 | 2.08E-13 | 1.3 |
| LLPH      | 9.01E-18 | 0.150035279  | 0.191 | 0.116 | 2.17E-13 | 1.3 |
| RPS29     | 9.26E-18 | -0.205970413 | 0.958 | 0.968 | 2.23E-13 | 1.3 |
| ACBD6     | 9.80E-18 | 0.224589925  | 0.11  | 0.057 | 2.36E-13 | 1.3 |
| C1D       | 1.04E-17 | 0.156872546  | 0.193 | 0.119 | 2.51E-13 | 1.3 |
| HIST1H2BC | 1.07E-17 | 0.16540926   | 0.357 | 0.256 | 2.57E-13 | 1.3 |

|           |          |              |       |       |          |     |
|-----------|----------|--------------|-------|-------|----------|-----|
| CTCF      | 1.07E-17 | 0.144712856  | 0.116 | 0.061 | 2.59E-13 | 1.3 |
| BCL2A1    | 1.09E-17 | -0.564962938 | 0.105 | 0.176 | 2.63E-13 | 1.3 |
| GAPDH     | 1.23E-17 | 0.365821566  | 0.682 | 0.578 | 2.95E-13 | 1.3 |
| THADA     | 1.34E-17 | 0.271821248  | 0.345 | 0.249 | 3.23E-13 | 1.3 |
| TMEM33    | 1.41E-17 | 0.166730954  | 0.137 | 0.076 | 3.39E-13 | 1.3 |
| PHLPP1    | 1.42E-17 | -0.496429009 | 0.418 | 0.474 | 3.42E-13 | 1.3 |
| CHKA      | 1.49E-17 | 0.217319627  | 0.176 | 0.107 | 3.59E-13 | 1.3 |
| CD83      | 1.49E-17 | -0.338177836 | 0.055 | 0.115 | 3.60E-13 | 1.3 |
| PROM1     | 1.50E-17 | 0.177432225  | 0.549 | 0.426 | 3.62E-13 | 1.3 |
| KLHL2     | 1.52E-17 | 0.184660231  | 0.105 | 0.054 | 3.67E-13 | 1.3 |
| RHOJ      | 1.61E-17 | 0.119024051  | 0.062 | 0.025 | 3.89E-13 | 1.3 |
| CYLD      | 1.66E-17 | -0.340814383 | 0.181 | 0.262 | 3.99E-13 | 1.3 |
| SMS       | 1.72E-17 | -0.600977211 | 0.349 | 0.404 | 4.15E-13 | 1.3 |
| GCNT2     | 1.81E-17 | 0.172641018  | 0.45  | 0.335 | 4.36E-13 | 1.3 |
| NEURL3    | 1.90E-17 | 0.178302841  | 0.099 | 0.049 | 4.57E-13 | 1.3 |
| CEBPB     | 2.05E-17 | 0.229649059  | 0.2   | 0.127 | 4.93E-13 | 1.3 |
| JPX       | 2.07E-17 | 0.188108041  | 0.331 | 0.234 | 5.00E-13 | 1.3 |
| ASCC1     | 2.22E-17 | 0.200604129  | 0.231 | 0.152 | 5.36E-13 | 1.3 |
| S100B     | 2.31E-17 | -0.220620126 | 0.019 | 0.064 | 5.57E-13 | 1.3 |
| TES       | 2.38E-17 | -0.382513785 | 0.267 | 0.34  | 5.73E-13 | 1.3 |
| TBC1D22A  | 2.46E-17 | 0.244898646  | 0.183 | 0.113 | 5.93E-13 | 1.3 |
| KIAA0319L | 2.54E-17 | 0.253847198  | 0.22  | 0.145 | 6.13E-13 | 1.3 |
| PPM1L     | 2.65E-17 | 0.200142832  | 0.114 | 0.06  | 6.40E-13 | 1.3 |
| FAM63B    | 2.67E-17 | 0.190245989  | 0.184 | 0.114 | 6.45E-13 | 1.3 |
| NIPAL3    | 2.92E-17 | 0.164146048  | 0.12  | 0.065 | 7.05E-13 | 1.3 |
| RND3      | 3.01E-17 | -0.407316424 | 0.242 | 0.321 | 7.26E-13 | 1.3 |
| PARP1     | 3.03E-17 | 0.158254569  | 0.132 | 0.074 | 7.30E-13 | 1.3 |
| BTD       | 3.28E-17 | 0.127020193  | 0.092 | 0.044 | 7.91E-13 | 1.3 |
| DST       | 3.39E-17 | 0.222576145  | 0.669 | 0.569 | 8.17E-13 | 1.3 |
| NEBL      | 3.45E-17 | 0.244612785  | 0.591 | 0.472 | 8.31E-13 | 1.3 |
| CSGALNAC  | 3.88E-17 | 0.243927111  | 0.133 | 0.075 | 9.35E-13 | 1.3 |
| NDUFB3    | 3.92E-17 | 0.172641401  | 0.284 | 0.195 | 9.45E-13 | 1.3 |
| BTBD11    | 4.50E-17 | 0.226248951  | 0.116 | 0.062 | 1.09E-12 | 1.3 |
| MORC3     | 4.52E-17 | -0.360179941 | 0.17  | 0.244 | 1.09E-12 | 1.3 |
| PLEKHS1   | 4.75E-17 | 0.1923333    | 0.333 | 0.237 | 1.15E-12 | 1.3 |
| TNFRSF21  | 4.83E-17 | 0.159337954  | 0.107 | 0.055 | 1.17E-12 | 1.3 |
| MRPS18C   | 5.13E-17 | 0.168695883  | 0.254 | 0.171 | 1.24E-12 | 1.3 |
| MRPS14    | 5.20E-17 | 0.173160705  | 0.217 | 0.14  | 1.25E-12 | 1.3 |
| TRIM2     | 5.30E-17 | 0.147985774  | 0.384 | 0.276 | 1.28E-12 | 1.3 |
| COPS2     | 5.45E-17 | -0.328766165 | 0.3   | 0.373 | 1.31E-12 | 1.3 |
| VWA8      | 6.26E-17 | 0.183459465  | 0.104 | 0.054 | 1.51E-12 | 1.3 |
| ST3GAL1   | 6.36E-17 | 0.183457985  | 0.255 | 0.172 | 1.53E-12 | 1.3 |
| BCAP29    | 6.39E-17 | 0.191007702  | 0.213 | 0.138 | 1.54E-12 | 1.3 |
| DLG2      | 6.55E-17 | 0.297630314  | 0.224 | 0.148 | 1.58E-12 | 1.3 |
| C15orf41  | 7.45E-17 | 0.188767662  | 0.112 | 0.06  | 1.80E-12 | 1.3 |
| GPR87     | 7.50E-17 | 0.138154315  | 0.091 | 0.044 | 1.81E-12 | 1.3 |
| LIPH      | 7.92E-17 | -0.813501577 | 0.44  | 0.479 | 1.91E-12 | 1.3 |

|           |          |              |       |       |          |     |
|-----------|----------|--------------|-------|-------|----------|-----|
| PPP2R5A   | 8.21E-17 | 0.206899006  | 0.202 | 0.13  | 1.98E-12 | 1.3 |
| MBD5      | 8.63E-17 | 0.214396365  | 0.337 | 0.242 | 2.08E-12 | 1.3 |
| TRAPPC9   | 8.98E-17 | 0.240041767  | 0.236 | 0.158 | 2.17E-12 | 1.3 |
| CARD6     | 9.32E-17 | 0.163262109  | 0.088 | 0.043 | 2.25E-12 | 1.3 |
| ACP1      | 9.80E-17 | 0.206348646  | 0.485 | 0.377 | 2.36E-12 | 1.3 |
| SEMA6A-A' | 1.00E-16 | 0.227234591  | 0.324 | 0.229 | 2.42E-12 | 1.3 |
| PARP4     | 1.03E-16 | 0.220268672  | 0.257 | 0.175 | 2.49E-12 | 1.3 |
| C11orf80  | 1.05E-16 | 0.208423128  | 0.283 | 0.197 | 2.53E-12 | 1.3 |
| VTI1A     | 1.05E-16 | 0.257104088  | 0.225 | 0.148 | 2.54E-12 | 1.3 |
| SLC9A7    | 1.08E-16 | -0.424047754 | 0.235 | 0.309 | 2.61E-12 | 1.3 |
| C1GALT1C1 | 1.09E-16 | 0.121036921  | 0.079 | 0.036 | 2.63E-12 | 1.3 |
| PSMA3     | 1.11E-16 | 0.260623899  | 0.517 | 0.413 | 2.67E-12 | 1.3 |
| FLRT3     | 1.14E-16 | 0.11639784   | 0.049 | 0.017 | 2.74E-12 | 1.3 |
| KCMF1     | 1.17E-16 | -0.42631598  | 0.251 | 0.32  | 2.83E-12 | 1.3 |
| CXCL8     | 1.19E-16 | 0.274074552  | 0.428 | 0.334 | 2.87E-12 | 1.3 |
| SLC36A4   | 1.24E-16 | 0.142770111  | 0.108 | 0.057 | 2.99E-12 | 1.3 |
| MGAM2     | 1.32E-16 | 0.200540729  | 0.419 | 0.311 | 3.19E-12 | 1.3 |
| UBE4B     | 1.32E-16 | 0.173165014  | 0.276 | 0.19  | 3.19E-12 | 1.3 |
| RAB31     | 1.34E-16 | 0.199862819  | 0.156 | 0.093 | 3.22E-12 | 1.3 |
| KDM5B     | 1.42E-16 | -0.368798706 | 0.531 | 0.568 | 3.42E-12 | 1.3 |
| S100A10   | 1.43E-16 | 0.253003249  | 0.384 | 0.283 | 3.46E-12 | 1.3 |
| EPB42     | 1.45E-16 | -0.250292122 | 0.907 | 0.934 | 3.50E-12 | 1.3 |
| CRY1      | 1.49E-16 | -0.478433863 | 0.288 | 0.363 | 3.59E-12 | 1.3 |
| GPRIN3    | 1.52E-16 | 0.132412349  | 0.058 | 0.023 | 3.65E-12 | 1.3 |
| VBP1      | 1.59E-16 | 0.182296087  | 0.206 | 0.133 | 3.83E-12 | 1.3 |
| RFWD2     | 1.65E-16 | 0.21435313   | 0.368 | 0.268 | 3.97E-12 | 1.3 |
| SYNE2     | 1.67E-16 | 0.190430866  | 0.599 | 0.479 | 4.02E-12 | 1.3 |
| HNRNPA2B  | 1.78E-16 | 0.236127615  | 0.502 | 0.395 | 4.30E-12 | 1.3 |
| CPEB3     | 1.82E-16 | -0.507960722 | 0.282 | 0.352 | 4.38E-12 | 1.3 |
| TFB1M     | 2.10E-16 | 0.143084409  | 0.098 | 0.05  | 5.05E-12 | 1.3 |
| CBX1      | 2.21E-16 | -0.295001803 | 0.092 | 0.157 | 5.33E-12 | 1.3 |
| GNG12     | 2.23E-16 | -0.393578911 | 0.25  | 0.323 | 5.37E-12 | 1.3 |
| SLC4A7    | 2.28E-16 | 0.223493199  | 0.408 | 0.311 | 5.49E-12 | 1.3 |
| ACLY      | 2.28E-16 | 0.12526465   | 0.157 | 0.093 | 5.51E-12 | 1.3 |
| PRR13     | 2.38E-16 | 0.154746148  | 0.129 | 0.073 | 5.73E-12 | 1.3 |
| WWOX      | 2.48E-16 | 0.308030895  | 0.286 | 0.202 | 5.98E-12 | 1.3 |
| FRMD5     | 2.69E-16 | 0.199107137  | 0.226 | 0.15  | 6.49E-12 | 1.3 |
| THSD4-AS1 | 2.73E-16 | 0.174419245  | 0.553 | 0.435 | 6.59E-12 | 1.3 |
| ELF1      | 2.75E-16 | -0.382600899 | 0.398 | 0.46  | 6.62E-12 | 1.3 |
| HIST1H4H  | 3.01E-16 | 0.144670494  | 0.109 | 0.058 | 7.27E-12 | 1.3 |
| ITGB6     | 3.77E-16 | -0.345608184 | 0.255 | 0.335 | 9.08E-12 | 1.3 |
| PSMA5     | 3.95E-16 | 0.176696407  | 0.281 | 0.196 | 9.53E-12 | 1.3 |
| MEIS2     | 4.22E-16 | 0.216263458  | 0.324 | 0.232 | 1.02E-11 | 1.3 |
| PPTC7     | 4.24E-16 | -0.387417513 | 0.161 | 0.236 | 1.02E-11 | 1.3 |
| MRPL51    | 4.26E-16 | 0.224042535  | 0.502 | 0.399 | 1.03E-11 | 1.3 |
| UQCRB     | 4.38E-16 | -0.235120306 | 0.813 | 0.832 | 1.06E-11 | 1.3 |
| CNN3      | 4.39E-16 | -0.443793813 | 0.424 | 0.475 | 1.06E-11 | 1.3 |

|                   |          |              |       |       |          |     |
|-------------------|----------|--------------|-------|-------|----------|-----|
| FOCAD             | 4.58E-16 | 0.208728011  | 0.238 | 0.16  | 1.10E-11 | 1.3 |
| DPYD-AS1          | 4.59E-16 | 0.180391762  | 0.134 | 0.076 | 1.11E-11 | 1.3 |
| LYN               | 4.79E-16 | 0.106235439  | 0.8   | 0.65  | 1.16E-11 | 1.3 |
| CYB5B             | 4.80E-16 | 0.166184193  | 0.22  | 0.144 | 1.16E-11 | 1.3 |
| TFCP2             | 4.95E-16 | 0.170955768  | 0.188 | 0.119 | 1.19E-11 | 1.3 |
| FOXN3             | 5.43E-16 | 0.211047205  | 0.297 | 0.211 | 1.31E-11 | 1.3 |
| EXT1              | 5.49E-16 | -0.417442818 | 0.527 | 0.575 | 1.32E-11 | 1.3 |
| GULP1             | 5.58E-16 | 0.188461588  | 0.249 | 0.169 | 1.35E-11 | 1.3 |
| MAP1B             | 5.61E-16 | 0.165546792  | 0.491 | 0.38  | 1.35E-11 | 1.3 |
| PTPN4             | 5.73E-16 | 0.182347763  | 0.134 | 0.077 | 1.38E-11 | 1.3 |
| TM4SF1            | 6.05E-16 | -0.68641213  | 0.889 | 0.9   | 1.46E-11 | 1.3 |
| TALDO1            | 6.05E-16 | 0.179560247  | 0.123 | 0.069 | 1.46E-11 | 1.3 |
| YBX1              | 6.50E-16 | 0.221102178  | 0.413 | 0.316 | 1.57E-11 | 1.3 |
| ARHGAP24          | 6.67E-16 | 0.201453373  | 0.08  | 0.038 | 1.61E-11 | 1.3 |
| HES1              | 7.02E-16 | 0.212506804  | 0.314 | 0.226 | 1.69E-11 | 1.3 |
| CYP20A1           | 7.43E-16 | 0.155265895  | 0.107 | 0.057 | 1.79E-11 | 1.3 |
| GLYATL2           | 7.50E-16 | 0.127348404  | 0.113 | 0.061 | 1.81E-11 | 1.3 |
| PLOD2             | 7.59E-16 | 0.206327263  | 0.215 | 0.141 | 1.83E-11 | 1.3 |
| EIF2S2            | 7.80E-16 | 0.190063628  | 0.343 | 0.251 | 1.88E-11 | 1.3 |
| GABARAP           | 8.12E-16 | -0.393482712 | 0.25  | 0.323 | 1.96E-11 | 1.3 |
| KMT2A             | 8.28E-16 | -0.308211752 | 0.347 | 0.42  | 2.00E-11 | 1.3 |
| UBR5              | 8.48E-16 | -0.343732672 | 0.355 | 0.427 | 2.04E-11 | 1.3 |
| IFRD1             | 8.53E-16 | -0.411667813 | 0.328 | 0.397 | 2.06E-11 | 1.3 |
| LARP7             | 8.56E-16 | 0.166699143  | 0.231 | 0.155 | 2.06E-11 | 1.3 |
| FAF2              | 9.03E-16 | 0.165281976  | 0.228 | 0.152 | 2.18E-11 | 1.3 |
| NFAT5             | 9.08E-16 | -0.311253585 | 0.597 | 0.636 | 2.19E-11 | 1.3 |
| NARS2             | 9.23E-16 | 0.160093894  | 0.099 | 0.052 | 2.23E-11 | 1.3 |
| OSBPL10           | 9.53E-16 | 0.230164566  | 0.185 | 0.117 | 2.30E-11 | 1.3 |
| HSP90AB1          | 9.53E-16 | -0.220145483 | 0.928 | 0.939 | 2.30E-11 | 1.3 |
| EMC3              | 9.73E-16 | 0.167270788  | 0.212 | 0.138 | 2.35E-11 | 1.3 |
| HIST1H2BG         | 1.08E-15 | 0.150997933  | 0.153 | 0.092 | 2.60E-11 | 1.3 |
| STOX2             | 1.13E-15 | 0.176665403  | 0.237 | 0.158 | 2.72E-11 | 1.3 |
| MEAF6             | 1.16E-15 | -0.313751008 | 0.099 | 0.163 | 2.80E-11 | 1.3 |
| PPP1R7            | 1.16E-15 | 0.11419964   | 0.081 | 0.038 | 2.81E-11 | 1.3 |
| MMP7              | 1.26E-15 | 0.325065806  | 0.38  | 0.289 | 3.04E-11 | 1.3 |
| RPRD2             | 1.35E-15 | 0.21433919   | 0.203 | 0.132 | 3.26E-11 | 1.3 |
| LSS               | 1.39E-15 | 0.144922498  | 0.081 | 0.039 | 3.36E-11 | 1.3 |
| MGA               | 1.45E-15 | 0.165683055  | 0.107 | 0.057 | 3.49E-11 | 1.3 |
| PRDM1             | 1.74E-15 | 0.163499748  | 0.104 | 0.056 | 4.19E-11 | 1.3 |
| CKS1B             | 1.86E-15 | 0.209057526  | 0.467 | 0.364 | 4.48E-11 | 1.3 |
| DCAF13            | 1.87E-15 | 0.14637281   | 0.125 | 0.071 | 4.50E-11 | 1.3 |
| PPP1R9A           | 1.91E-15 | 0.19289214   | 0.265 | 0.186 | 4.60E-11 | 1.3 |
| SIPA1L3           | 1.95E-15 | 0.202560856  | 0.237 | 0.16  | 4.71E-11 | 1.3 |
| C1QTNF3- <i>A</i> | 2.00E-15 | 0.197900158  | 0.279 | 0.196 | 4.83E-11 | 1.3 |
| TAGLN2            | 2.01E-15 | 0.218150511  | 0.244 | 0.166 | 4.84E-11 | 1.3 |
| RP11-634B         | 2.04E-15 | 0.105473506  | 0.044 | 0.016 | 4.93E-11 | 1.3 |
| C11orf54          | 2.12E-15 | 0.153722172  | 0.144 | 0.085 | 5.11E-11 | 1.3 |

|           |          |              |       |       |          |     |
|-----------|----------|--------------|-------|-------|----------|-----|
| MYH9      | 2.13E-15 | -0.281951073 | 0.435 | 0.507 | 5.13E-11 | 1.3 |
| NCBP2     | 2.26E-15 | 0.150705946  | 0.143 | 0.085 | 5.45E-11 | 1.3 |
| PSMD13    | 2.43E-15 | 0.144139939  | 0.118 | 0.066 | 5.86E-11 | 1.3 |
| CD63      | 2.44E-15 | 0.266746066  | 0.273 | 0.195 | 5.88E-11 | 1.3 |
| BRE       | 2.46E-15 | 0.182948049  | 0.229 | 0.154 | 5.93E-11 | 1.3 |
| FIGN      | 2.62E-15 | 0.228306357  | 0.182 | 0.116 | 6.31E-11 | 1.3 |
| RP11-519G | 3.46E-15 | -0.311568348 | 0.053 | 0.106 | 8.33E-11 | 1.3 |
| RP11-37B2 | 3.53E-15 | -0.426004549 | 0.24  | 0.311 | 8.50E-11 | 1.3 |
| LYRM2     | 3.68E-15 | 0.13141411   | 0.156 | 0.094 | 8.87E-11 | 1.3 |
| ACTR6     | 3.69E-15 | 0.135119799  | 0.23  | 0.153 | 8.89E-11 | 1.3 |
| HELZ      | 3.71E-15 | -0.369108704 | 0.272 | 0.344 | 8.95E-11 | 1.3 |
| TNRC18    | 3.80E-15 | 0.158188288  | 0.094 | 0.049 | 9.16E-11 | 1.3 |
| PLD1      | 4.01E-15 | 0.143229953  | 0.141 | 0.083 | 9.66E-11 | 1.3 |
| CLASP2    | 4.09E-15 | 0.175890402  | 0.297 | 0.21  | 9.86E-11 | 1.3 |
| TCEB2     | 4.09E-15 | 0.200609618  | 0.069 | 0.032 | 9.87E-11 | 1.3 |
| SGPL1     | 4.10E-15 | 0.140174388  | 0.166 | 0.103 | 9.89E-11 | 1.3 |
| SNRPD3    | 4.17E-15 | 0.186043256  | 0.423 | 0.325 | 1.00E-10 | 1.3 |
| CAP2      | 4.28E-15 | 0.183621634  | 0.139 | 0.083 | 1.03E-10 | 1.3 |
| FAM114A1  | 4.47E-15 | 0.206472407  | 0.2   | 0.132 | 1.08E-10 | 1.3 |
| MLLT10    | 4.52E-15 | 0.178927936  | 0.22  | 0.146 | 1.09E-10 | 1.3 |
| MT-ND3    | 4.57E-15 | 0.134731377  | 0.984 | 0.984 | 1.10E-10 | 1.3 |
| TEFM      | 4.62E-15 | 0.149651356  | 0.08  | 0.039 | 1.11E-10 | 1.3 |
| BBX       | 4.85E-15 | 0.191913459  | 0.469 | 0.365 | 1.17E-10 | 1.3 |
| VAT1      | 5.00E-15 | 0.160060509  | 0.168 | 0.105 | 1.20E-10 | 1.3 |
| BRINP1    | 5.09E-15 | 0.21302626   | 0.26  | 0.182 | 1.23E-10 | 1.3 |
| RORA      | 5.23E-15 | -0.357420711 | 0.443 | 0.5   | 1.26E-10 | 1.3 |
| STXBP5    | 5.32E-15 | 0.168740332  | 0.139 | 0.083 | 1.28E-10 | 1.3 |
| RAPGEF5   | 5.50E-15 | 0.153858482  | 0.573 | 0.451 | 1.33E-10 | 1.3 |
| NFATC2    | 5.82E-15 | -0.35904062  | 0.098 | 0.162 | 1.40E-10 | 1.3 |
| LRRC49    | 5.86E-15 | 0.187631397  | 0.171 | 0.108 | 1.41E-10 | 1.3 |
| PSMD14    | 5.93E-15 | 0.134561323  | 0.103 | 0.055 | 1.43E-10 | 1.3 |
| TUBA1C    | 6.21E-15 | 0.153412702  | 0.436 | 0.331 | 1.50E-10 | 1.3 |
| GSDMC     | 6.45E-15 | 0.115889261  | 0.064 | 0.028 | 1.56E-10 | 1.3 |
| GJA1      | 6.60E-15 | -0.237827271 | 0.026 | 0.069 | 1.59E-10 | 1.3 |
| TGOLN2    | 6.92E-15 | 0.14724287   | 0.157 | 0.097 | 1.67E-10 | 1.3 |
| SLTM      | 7.55E-15 | 0.200503978  | 0.325 | 0.238 | 1.82E-10 | 1.3 |
| PRKDC     | 7.78E-15 | 0.15436087   | 0.16  | 0.098 | 1.88E-10 | 1.3 |
| GRIP1     | 8.49E-15 | 0.211812108  | 0.257 | 0.18  | 2.05E-10 | 1.3 |
| BPNT1     | 9.54E-15 | 0.132232775  | 0.093 | 0.049 | 2.30E-10 | 1.3 |
| TPT1-AS1  | 9.65E-15 | -0.330050728 | 0.36  | 0.423 | 2.33E-10 | 1.3 |
| CXCL1     | 9.99E-15 | 0.198765181  | 0.314 | 0.231 | 2.41E-10 | 1.3 |
| RAD21     | 1.04E-14 | -0.395902846 | 0.315 | 0.375 | 2.51E-10 | 1.3 |
| LRP10     | 1.07E-14 | 0.174165433  | 0.154 | 0.095 | 2.59E-10 | 1.3 |
| FAS       | 1.08E-14 | -0.293449651 | 0.144 | 0.214 | 2.60E-10 | 1.3 |
| RNF130    | 1.16E-14 | 0.183800676  | 0.213 | 0.144 | 2.79E-10 | 1.3 |
| C10orf10  | 1.19E-14 | 0.129962296  | 0.256 | 0.176 | 2.86E-10 | 1.3 |
| NR2F2     | 1.22E-14 | 0.155582192  | 0.134 | 0.08  | 2.93E-10 | 1.3 |

|           |          |              |       |       |          |     |
|-----------|----------|--------------|-------|-------|----------|-----|
| ATR       | 1.22E-14 | 0.157361376  | 0.223 | 0.15  | 2.94E-10 | 1.3 |
| IFI16     | 1.23E-14 | 0.172785768  | 0.343 | 0.253 | 2.97E-10 | 1.3 |
| PTPRE     | 1.29E-14 | 0.16266305   | 0.179 | 0.114 | 3.11E-10 | 1.3 |
| LCN2      | 1.32E-14 | 0.261228014  | 0.062 | 0.028 | 3.18E-10 | 1.3 |
| SUGT1     | 1.32E-14 | 0.158306526  | 0.205 | 0.135 | 3.19E-10 | 1.3 |
| ZNF69     | 1.32E-14 | 0.13360041   | 0.089 | 0.046 | 3.19E-10 | 1.3 |
| SPRED2    | 1.33E-14 | 0.158627621  | 0.163 | 0.102 | 3.21E-10 | 1.3 |
| KCCAT211  | 1.38E-14 | 0.198155184  | 0.086 | 0.044 | 3.34E-10 | 1.3 |
| CLIC6     | 1.40E-14 | 0.184055087  | 0.153 | 0.095 | 3.38E-10 | 1.3 |
| ATE1      | 1.44E-14 | 0.139627269  | 0.153 | 0.094 | 3.47E-10 | 1.3 |
| WDR70     | 1.45E-14 | 0.214608914  | 0.178 | 0.115 | 3.51E-10 | 1.3 |
| RP11-96H1 | 1.47E-14 | 0.215078726  | 0.158 | 0.098 | 3.55E-10 | 1.3 |
| SMAD1     | 1.49E-14 | 0.152571387  | 0.127 | 0.074 | 3.59E-10 | 1.3 |
| NBR1      | 1.51E-14 | 0.177200004  | 0.225 | 0.153 | 3.63E-10 | 1.3 |
| UBE2E3    | 1.56E-14 | 0.164222464  | 0.23  | 0.157 | 3.77E-10 | 1.3 |
| FBLN5     | 1.72E-14 | 0.190367177  | 0.407 | 0.311 | 4.16E-10 | 1.3 |
| PM20D2    | 1.74E-14 | 0.146480815  | 0.185 | 0.12  | 4.19E-10 | 1.3 |
| LINC01235 | 1.74E-14 | 0.20666665   | 0.253 | 0.177 | 4.19E-10 | 1.3 |
| GABRE     | 1.80E-14 | 0.13380126   | 0.097 | 0.052 | 4.35E-10 | 1.3 |
| ZNF609    | 1.82E-14 | 0.192089454  | 0.609 | 0.507 | 4.38E-10 | 1.3 |
| MBNL1     | 1.84E-14 | 0.21224418   | 0.504 | 0.399 | 4.43E-10 | 1.3 |
| ARL6IP5   | 1.86E-14 | 0.166214019  | 0.568 | 0.461 | 4.47E-10 | 1.3 |
| OXSR1     | 1.99E-14 | -0.361337561 | 0.184 | 0.251 | 4.79E-10 | 1.3 |
| NUP107    | 2.01E-14 | 0.13844862   | 0.205 | 0.136 | 4.84E-10 | 1.3 |
| SLC28A3   | 2.12E-14 | 0.15536171   | 0.44  | 0.333 | 5.11E-10 | 1.3 |
| C5orf63   | 2.25E-14 | 0.109560195  | 0.061 | 0.027 | 5.42E-10 | 1.3 |
| PTRH2     | 2.26E-14 | 0.174395674  | 0.221 | 0.148 | 5.46E-10 | 1.3 |
| AMN1      | 2.35E-14 | 0.168590285  | 0.176 | 0.113 | 5.67E-10 | 1.3 |
| CDC42SE1  | 2.37E-14 | 0.187059016  | 0.207 | 0.138 | 5.71E-10 | 1.3 |
| RARRES3   | 2.37E-14 | -0.370835688 | 0.265 | 0.334 | 5.72E-10 | 1.3 |
| LDLRAD3   | 2.39E-14 | 0.182116494  | 0.369 | 0.277 | 5.76E-10 | 1.3 |
| DNAJC8    | 2.40E-14 | 0.158665312  | 0.29  | 0.207 | 5.80E-10 | 1.3 |
| NSD1      | 2.49E-14 | 0.161894742  | 0.198 | 0.13  | 6.00E-10 | 1.3 |
| FAM32A    | 2.52E-14 | 0.111657856  | 0.106 | 0.058 | 6.09E-10 | 1.3 |
| CNTN3     | 2.54E-14 | 0.133496978  | 0.048 | 0.019 | 6.12E-10 | 1.3 |
| BCL2L14   | 2.66E-14 | -0.268301985 | 0.101 | 0.163 | 6.41E-10 | 1.3 |
| ICA1      | 3.00E-14 | 0.191321034  | 0.351 | 0.26  | 7.24E-10 | 1.3 |
| SERPINB4  | 3.00E-14 | 0.173392662  | 0.137 | 0.082 | 7.24E-10 | 1.3 |
| ARHGEF3   | 3.07E-14 | 0.158725751  | 0.381 | 0.286 | 7.41E-10 | 1.3 |
| RPS23     | 3.19E-14 | -0.168729216 | 0.977 | 0.986 | 7.69E-10 | 1.3 |
| NFATC3    | 3.24E-14 | 0.170038403  | 0.211 | 0.143 | 7.81E-10 | 1.3 |
| STAMPB    | 3.30E-14 | 0.1731076    | 0.241 | 0.167 | 7.95E-10 | 1.3 |
| SOCS6     | 3.30E-14 | 0.147023096  | 0.169 | 0.107 | 7.96E-10 | 1.3 |
| RBL2      | 3.36E-14 | 0.191679603  | 0.138 | 0.083 | 8.11E-10 | 1.3 |
| RAP2B     | 3.63E-14 | -0.329017734 | 0.142 | 0.207 | 8.76E-10 | 1.3 |
| MOB4      | 3.71E-14 | 0.152167023  | 0.256 | 0.178 | 8.95E-10 | 1.3 |
| RNF217    | 3.73E-14 | 0.190242231  | 0.135 | 0.082 | 9.00E-10 | 1.3 |



|           |          |              |       |       |          |     |
|-----------|----------|--------------|-------|-------|----------|-----|
| THUMPD3-  | 3.75E-14 | 0.162943566  | 0.373 | 0.282 | 9.04E-10 | 1.3 |
| SLC24A3   | 4.03E-14 | 0.19498773   | 0.215 | 0.144 | 9.72E-10 | 1.3 |
| CLDN8     | 4.12E-14 | 0.125873205  | 0.127 | 0.074 | 9.93E-10 | 1.3 |
| NFIC      | 4.23E-14 | 0.169712842  | 0.228 | 0.155 | 1.02E-09 | 1.3 |
| XPR1      | 4.29E-14 | 0.151912711  | 0.168 | 0.107 | 1.03E-09 | 1.3 |
| MYCBP2    | 4.34E-14 | 0.211806199  | 0.225 | 0.155 | 1.05E-09 | 1.3 |
| FAF1      | 4.38E-14 | 0.222200773  | 0.335 | 0.248 | 1.06E-09 | 1.3 |
| LNX1      | 4.42E-14 | 0.193706317  | 0.134 | 0.081 | 1.07E-09 | 1.3 |
| LYPLA1    | 4.45E-14 | 0.165771193  | 0.15  | 0.093 | 1.07E-09 | 1.3 |
| ANKIB1    | 4.49E-14 | 0.174073686  | 0.39  | 0.294 | 1.08E-09 | 1.3 |
| BMS1      | 4.87E-14 | 0.161399064  | 0.145 | 0.089 | 1.17E-09 | 1.3 |
| MKL2      | 4.91E-14 | 0.185406709  | 0.325 | 0.238 | 1.18E-09 | 1.3 |
| RP11-739G | 5.22E-14 | -0.26459426  | 0.014 | 0.05  | 1.26E-09 | 1.3 |
| PSMC2     | 5.28E-14 | 0.188000961  | 0.352 | 0.263 | 1.27E-09 | 1.3 |
| FAM20C    | 5.34E-14 | 0.229853381  | 0.142 | 0.087 | 1.29E-09 | 1.3 |
| ZNF98     | 5.37E-14 | 0.153540578  | 0.13  | 0.077 | 1.29E-09 | 1.3 |
| RPL39     | 5.41E-14 | -0.182432848 | 0.932 | 0.947 | 1.30E-09 | 1.3 |
| STRN      | 5.55E-14 | -0.371074534 | 0.355 | 0.412 | 1.34E-09 | 1.3 |
| CLSTN1    | 6.06E-14 | 0.15959708   | 0.114 | 0.065 | 1.46E-09 | 1.3 |
| NFE2L2    | 6.66E-14 | 0.160496303  | 0.431 | 0.331 | 1.61E-09 | 1.3 |
| FANCL     | 6.77E-14 | 0.152948389  | 0.117 | 0.068 | 1.63E-09 | 1.3 |
| NUDCD3    | 7.03E-14 | 0.174987672  | 0.149 | 0.092 | 1.69E-09 | 1.3 |
| PGD       | 7.25E-14 | 0.14851954   | 0.1   | 0.055 | 1.75E-09 | 1.3 |
| KANK1     | 7.37E-14 | 0.166159007  | 0.279 | 0.197 | 1.78E-09 | 1.3 |
| SOX4      | 7.53E-14 | -0.372446674 | 0.711 | 0.749 | 1.82E-09 | 1.3 |
| APEX1     | 7.55E-14 | -0.319428882 | 0.21  | 0.276 | 1.82E-09 | 1.3 |
| R3HDM2    | 7.61E-14 | 0.202000898  | 0.203 | 0.136 | 1.84E-09 | 1.3 |
| MED13     | 8.61E-14 | -0.321960918 | 0.3   | 0.366 | 2.08E-09 | 1.3 |
| RBM6      | 8.62E-14 | 0.17165002   | 0.404 | 0.307 | 2.08E-09 | 1.3 |
| QDPR      | 8.63E-14 | 0.131819945  | 0.095 | 0.052 | 2.08E-09 | 1.3 |
| MFSD6     | 9.28E-14 | 0.140758369  | 0.128 | 0.076 | 2.24E-09 | 1.3 |
| LLGL2     | 9.42E-14 | 0.136118945  | 0.117 | 0.068 | 2.27E-09 | 1.3 |
| RAP1B     | 9.48E-14 | -0.321166982 | 0.368 | 0.429 | 2.29E-09 | 1.3 |
| POMP      | 9.53E-14 | 0.242379746  | 0.713 | 0.642 | 2.30E-09 | 1.3 |
| KIAA1671  | 9.72E-14 | 0.176321955  | 0.238 | 0.165 | 2.34E-09 | 1.3 |
| CMTM8     | 9.80E-14 | 0.180554914  | 0.251 | 0.177 | 2.36E-09 | 1.3 |
| HLA-DRA   | 1.01E-13 | -0.459341375 | 0.111 | 0.172 | 2.43E-09 | 1.3 |
| PUDP      | 1.04E-13 | 0.104903133  | 0.063 | 0.029 | 2.50E-09 | 1.3 |
| NARS      | 1.08E-13 | 0.171293559  | 0.358 | 0.266 | 2.61E-09 | 1.3 |
| HGSNAT    | 1.10E-13 | 0.155725114  | 0.219 | 0.15  | 2.65E-09 | 1.3 |
| RDH10     | 1.11E-13 | 0.105039748  | 0.048 | 0.019 | 2.67E-09 | 1.3 |
| RP11-138A | 1.12E-13 | 0.151810297  | 0.169 | 0.107 | 2.69E-09 | 1.3 |
| ANGPT2    | 1.16E-13 | 0.128529297  | 0.073 | 0.036 | 2.79E-09 | 1.3 |
| VDR       | 1.16E-13 | 0.177315816  | 0.135 | 0.082 | 2.79E-09 | 1.3 |
| MUC15     | 1.16E-13 | 0.131461177  | 0.077 | 0.038 | 2.80E-09 | 1.3 |
| BBIP1     | 1.17E-13 | 0.137589439  | 0.147 | 0.091 | 2.81E-09 | 1.3 |
| S100A16   | 1.24E-13 | 0.200399538  | 0.14  | 0.087 | 2.99E-09 | 1.3 |

|           |          |              |       |       |          |     |
|-----------|----------|--------------|-------|-------|----------|-----|
| PLSCR1    | 1.25E-13 | 0.147446173  | 0.358 | 0.267 | 3.01E-09 | 1.3 |
| RAB18     | 1.47E-13 | -0.339122008 | 0.238 | 0.303 | 3.55E-09 | 1.3 |
| DNAJC10   | 1.49E-13 | 0.130409153  | 0.084 | 0.044 | 3.59E-09 | 1.3 |
| FXYD3     | 1.55E-13 | 0.196104338  | 0.596 | 0.498 | 3.73E-09 | 1.3 |
| KIAA0196  | 1.59E-13 | 0.123484646  | 0.081 | 0.042 | 3.84E-09 | 1.3 |
| NBEA      | 1.67E-13 | 0.196996021  | 0.152 | 0.096 | 4.02E-09 | 1.3 |
| PARK7     | 1.75E-13 | 0.212621988  | 0.545 | 0.455 | 4.22E-09 | 1.3 |
| HOOK2     | 1.76E-13 | 0.175410636  | 0.214 | 0.146 | 4.25E-09 | 1.3 |
| RSRP1     | 1.77E-13 | 0.167879062  | 0.313 | 0.228 | 4.26E-09 | 1.3 |
| ALOX5     | 2.05E-13 | 0.162065632  | 0.179 | 0.117 | 4.95E-09 | 1.3 |
| ARHGEF38  | 2.06E-13 | -0.350675811 | 0.443 | 0.497 | 4.97E-09 | 1.3 |
| SLC35F3   | 2.15E-13 | 0.134011573  | 0.082 | 0.042 | 5.19E-09 | 1.3 |
| TOM1L1    | 2.15E-13 | 0.173678211  | 0.267 | 0.19  | 5.19E-09 | 1.3 |
| OTUD7B    | 2.18E-13 | -0.309609681 | 0.123 | 0.185 | 5.27E-09 | 1.3 |
| SEC24A    | 2.21E-13 | -0.340401976 | 0.169 | 0.234 | 5.32E-09 | 1.3 |
| VLDLR-AS1 | 2.40E-13 | 0.117210716  | 0.049 | 0.02  | 5.78E-09 | 1.3 |
| MCPH1     | 2.51E-13 | 0.158122094  | 0.219 | 0.15  | 6.06E-09 | 1.3 |
| 7-Mar     | 2.52E-13 | -0.321426193 | 0.232 | 0.298 | 6.08E-09 | 1.3 |
| RARB      | 2.52E-13 | 0.111759561  | 0.095 | 0.051 | 6.09E-09 | 1.3 |
| CHST9     | 2.58E-13 | 0.133636473  | 0.072 | 0.035 | 6.21E-09 | 1.3 |
| CRIPT     | 2.64E-13 | 0.153231157  | 0.276 | 0.199 | 6.36E-09 | 1.3 |
| SLC25A13  | 2.70E-13 | 0.172199532  | 0.107 | 0.061 | 6.52E-09 | 1.3 |
| WWC1      | 2.78E-13 | 0.237176831  | 0.523 | 0.429 | 6.70E-09 | 1.3 |
| EPAS1     | 2.79E-13 | 0.143398817  | 0.119 | 0.07  | 6.73E-09 | 1.3 |
| HIPK3     | 2.88E-13 | 0.190924618  | 0.236 | 0.165 | 6.94E-09 | 1.3 |
| TANC1     | 3.03E-13 | 0.192880885  | 0.319 | 0.237 | 7.31E-09 | 1.3 |
| EXOC6     | 3.15E-13 | 0.155343202  | 0.115 | 0.067 | 7.60E-09 | 1.3 |
| NNMT      | 3.18E-13 | 0.321358293  | 0.119 | 0.071 | 7.66E-09 | 1.3 |
| GLIPR1    | 3.22E-13 | -0.544990153 | 0.311 | 0.358 | 7.77E-09 | 1.3 |
| OCLN      | 3.46E-13 | -0.351915682 | 0.268 | 0.33  | 8.34E-09 | 1.3 |
| ADK       | 3.48E-13 | 0.199996209  | 0.533 | 0.43  | 8.38E-09 | 1.3 |
| CYYR1     | 3.49E-13 | 0.132524554  | 0.113 | 0.065 | 8.43E-09 | 1.3 |
| MICU2     | 3.50E-13 | 0.156061343  | 0.176 | 0.116 | 8.45E-09 | 1.3 |
| DDX18     | 3.69E-13 | 0.170737294  | 0.436 | 0.345 | 8.91E-09 | 1.3 |
| RNF149    | 3.72E-13 | -0.329465618 | 0.249 | 0.315 | 8.97E-09 | 1.3 |
| TMEM135   | 3.73E-13 | 0.143469863  | 0.113 | 0.065 | 8.98E-09 | 1.3 |
| NFYB      | 3.79E-13 | 0.127564147  | 0.1   | 0.056 | 9.13E-09 | 1.3 |
| UFD1L     | 3.80E-13 | 0.108450739  | 0.104 | 0.058 | 9.16E-09 | 1.3 |
| PBRM1     | 3.81E-13 | 0.128918092  | 0.254 | 0.178 | 9.18E-09 | 1.3 |
| ABCC3     | 3.85E-13 | 0.137162021  | 0.045 | 0.018 | 9.28E-09 | 1.3 |
| MTRNR2L8  | 3.90E-13 | -0.256953822 | 0.153 | 0.218 | 9.41E-09 | 1.3 |
| DLD       | 4.29E-13 | 0.189472125  | 0.179 | 0.118 | 1.03E-08 | 1.3 |
| VPS45     | 4.31E-13 | 0.118881802  | 0.127 | 0.076 | 1.04E-08 | 1.3 |
| ALG14     | 4.33E-13 | 0.127308566  | 0.127 | 0.075 | 1.05E-08 | 1.3 |
| MPP6      | 4.35E-13 | 0.129609786  | 0.11  | 0.063 | 1.05E-08 | 1.3 |
| KPNA1     | 4.38E-13 | -0.357027717 | 0.225 | 0.287 | 1.06E-08 | 1.3 |
| ABLIM1    | 4.44E-13 | 0.1661019    | 0.325 | 0.241 | 1.07E-08 | 1.3 |

|          |          |              |       |       |          |     |
|----------|----------|--------------|-------|-------|----------|-----|
| ZNF708   | 4.45E-13 | 0.143237181  | 0.128 | 0.077 | 1.07E-08 | 1.3 |
| PRDX5    | 4.97E-13 | 0.192203879  | 0.097 | 0.054 | 1.20E-08 | 1.3 |
| HAX1     | 5.14E-13 | 0.172377786  | 0.401 | 0.309 | 1.24E-08 | 1.3 |
| DNAJB6   | 5.18E-13 | -0.365432893 | 0.307 | 0.365 | 1.25E-08 | 1.3 |
| IDH3A    | 5.48E-13 | 0.152515174  | 0.111 | 0.065 | 1.32E-08 | 1.3 |
| EXOC2    | 5.52E-13 | 0.135809024  | 0.108 | 0.062 | 1.33E-08 | 1.3 |
| AVL9     | 5.66E-13 | 0.183364032  | 0.232 | 0.163 | 1.36E-08 | 1.3 |
| VPS13C   | 5.69E-13 | 0.190082306  | 0.276 | 0.201 | 1.37E-08 | 1.3 |
| MPZL2    | 6.20E-13 | 0.139976071  | 0.173 | 0.113 | 1.49E-08 | 1.3 |
| B4GALT6  | 6.29E-13 | 0.100355448  | 0.066 | 0.032 | 1.52E-08 | 1.3 |
| RAI14    | 6.34E-13 | -0.330789307 | 0.126 | 0.186 | 1.53E-08 | 1.3 |
| MTRNR2L1 | 6.39E-13 | -0.321497349 | 0.231 | 0.298 | 1.54E-08 | 1.3 |
| RASD1    | 6.47E-13 | 0.104080065  | 0.054 | 0.024 | 1.56E-08 | 1.3 |
| FUT3     | 6.47E-13 | 0.107620627  | 0.049 | 0.021 | 1.56E-08 | 1.3 |
| PPID     | 6.51E-13 | 0.119140415  | 0.112 | 0.065 | 1.57E-08 | 1.3 |
| TNFAIP6  | 6.54E-13 | 0.135205515  | 0.494 | 0.393 | 1.58E-08 | 1.3 |
| RNF213   | 6.65E-13 | 0.181960175  | 0.233 | 0.163 | 1.60E-08 | 1.3 |
| TNPO3    | 6.68E-13 | 0.154804405  | 0.18  | 0.119 | 1.61E-08 | 1.3 |
| EGLN3    | 7.09E-13 | 0.14414032   | 0.159 | 0.101 | 1.71E-08 | 1.3 |
| TRMT112  | 7.27E-13 | 0.13488602   | 0.106 | 0.061 | 1.75E-08 | 1.3 |
| EVI5     | 7.49E-13 | 0.184964338  | 0.183 | 0.122 | 1.81E-08 | 1.3 |
| HS3ST3B1 | 7.72E-13 | 0.118585959  | 0.047 | 0.02  | 1.86E-08 | 1.3 |
| SSR1     | 7.76E-13 | 0.15522347   | 0.231 | 0.161 | 1.87E-08 | 1.3 |
| DYNLRB1  | 7.92E-13 | 0.140608458  | 0.33  | 0.246 | 1.91E-08 | 1.3 |
| RPL27    | 8.48E-13 | -0.142053998 | 0.942 | 0.959 | 2.04E-08 | 1.3 |
| SPINT1   | 9.05E-13 | 0.135930835  | 0.167 | 0.11  | 2.18E-08 | 1.3 |
| PTPN3    | 9.06E-13 | 0.105262235  | 0.106 | 0.06  | 2.18E-08 | 1.3 |
| GRIK1    | 9.06E-13 | 0.123895122  | 0.084 | 0.044 | 2.19E-08 | 1.3 |
| ESRRA    | 9.14E-13 | 0.13261337   | 0.1   | 0.056 | 2.20E-08 | 1.3 |
| PPP2R3C  | 9.69E-13 | 0.141443014  | 0.127 | 0.076 | 2.34E-08 | 1.3 |
| SRGAP2   | 9.75E-13 | 0.140487897  | 0.159 | 0.103 | 2.35E-08 | 1.3 |
| ZNF680   | 9.84E-13 | 0.105384177  | 0.137 | 0.084 | 2.37E-08 | 1.3 |
| TEX2     | 9.97E-13 | 0.116911606  | 0.095 | 0.053 | 2.40E-08 | 1.3 |
| PAWR     | 1.03E-12 | -0.328452319 | 0.449 | 0.491 | 2.48E-08 | 1.3 |
| CDH13    | 1.05E-12 | 0.132548003  | 0.077 | 0.039 | 2.53E-08 | 1.3 |
| INADL    | 1.12E-12 | 0.137513695  | 0.876 | 0.773 | 2.69E-08 | 1.3 |
| CCND3    | 1.13E-12 | 0.168668937  | 0.43  | 0.333 | 2.71E-08 | 1.3 |
| PHF14    | 1.21E-12 | 0.156928148  | 0.191 | 0.129 | 2.91E-08 | 1.3 |
| DGKH     | 1.26E-12 | 0.171061698  | 0.206 | 0.141 | 3.04E-08 | 1.3 |
| KIFC3    | 1.36E-12 | 0.123327933  | 0.07  | 0.035 | 3.27E-08 | 1.3 |
| TLK1     | 1.36E-12 | 0.167729348  | 0.263 | 0.188 | 3.29E-08 | 1.3 |
| FBN1     | 1.41E-12 | -0.180972926 | 0.022 | 0.059 | 3.40E-08 | 1.3 |
| BCAP31   | 1.53E-12 | 0.125775745  | 0.101 | 0.058 | 3.69E-08 | 1.3 |
| CX3CL1   | 1.59E-12 | 0.254654494  | 0.326 | 0.246 | 3.83E-08 | 1.3 |
| FAM151B  | 1.59E-12 | 0.112488036  | 0.075 | 0.039 | 3.84E-08 | 1.3 |
| PKD2     | 1.66E-12 | 0.161435387  | 0.121 | 0.073 | 4.01E-08 | 1.3 |
| CCDC90B  | 1.82E-12 | 0.126481672  | 0.135 | 0.084 | 4.40E-08 | 1.3 |

|          |          |              |       |       |          |     |
|----------|----------|--------------|-------|-------|----------|-----|
| TRABD2B  | 1.86E-12 | 0.229009338  | 0.144 | 0.091 | 4.50E-08 | 1.3 |
| TTLL4    | 1.94E-12 | 0.168361568  | 0.22  | 0.153 | 4.67E-08 | 1.3 |
| SS18L2   | 2.05E-12 | 0.133382169  | 0.185 | 0.124 | 4.93E-08 | 1.3 |
| RNF24    | 2.10E-12 | 0.168122916  | 0.496 | 0.395 | 5.07E-08 | 1.3 |
| LZIC     | 2.15E-12 | 0.122604303  | 0.129 | 0.079 | 5.18E-08 | 1.3 |
| DOCK9    | 2.32E-12 | 0.16439819   | 0.217 | 0.151 | 5.59E-08 | 1.3 |
| PPM1K    | 2.34E-12 | 0.160607617  | 0.125 | 0.077 | 5.63E-08 | 1.3 |
| RPS6KA3  | 2.37E-12 | -0.411808204 | 0.305 | 0.358 | 5.71E-08 | 1.3 |
| PON2     | 2.53E-12 | 0.118174868  | 0.087 | 0.048 | 6.09E-08 | 1.3 |
| NOL3     | 2.55E-12 | 0.116431786  | 0.078 | 0.041 | 6.14E-08 | 1.3 |
| NFIL3    | 2.68E-12 | -0.297893153 | 0.115 | 0.169 | 6.46E-08 | 1.3 |
| EPS8     | 2.71E-12 | 0.142241783  | 0.526 | 0.423 | 6.53E-08 | 1.3 |
| RAN      | 2.74E-12 | 0.153668105  | 0.669 | 0.582 | 6.60E-08 | 1.3 |
| TCF20    | 2.76E-12 | 0.152898563  | 0.151 | 0.097 | 6.65E-08 | 1.3 |
| TBCA     | 2.88E-12 | 0.201482634  | 0.737 | 0.658 | 6.94E-08 | 1.3 |
| EXOC6B   | 2.91E-12 | 0.203549929  | 0.245 | 0.175 | 7.02E-08 | 1.3 |
| ST3GAL6  | 2.94E-12 | 0.187462536  | 0.16  | 0.105 | 7.09E-08 | 1.3 |
| SDHC     | 2.99E-12 | 0.132132941  | 0.196 | 0.134 | 7.21E-08 | 1.3 |
| FAM217B  | 2.99E-12 | 0.10516462   | 0.063 | 0.031 | 7.21E-08 | 1.3 |
| RHBDL2   | 3.03E-12 | 0.1213982    | 0.069 | 0.035 | 7.30E-08 | 1.3 |
| 6-Mar    | 3.04E-12 | -0.318480419 | 0.302 | 0.358 | 7.33E-08 | 1.3 |
| SDF2     | 3.11E-12 | 0.112417183  | 0.136 | 0.084 | 7.49E-08 | 1.3 |
| GSK3B    | 3.12E-12 | 0.175505829  | 0.36  | 0.275 | 7.52E-08 | 1.3 |
| BMPR1A   | 3.12E-12 | 0.174605754  | 0.346 | 0.263 | 7.53E-08 | 1.3 |
| CISD1    | 3.14E-12 | 0.156874363  | 0.281 | 0.205 | 7.57E-08 | 1.3 |
| RTN3     | 3.18E-12 | 0.148442921  | 0.248 | 0.177 | 7.67E-08 | 1.3 |
| MFAP1    | 3.34E-12 | 0.122141947  | 0.208 | 0.142 | 8.05E-08 | 1.3 |
| SLC22A23 | 3.35E-12 | 0.169356898  | 0.214 | 0.149 | 8.07E-08 | 1.3 |
| KIT      | 3.49E-12 | 0.173456858  | 0.436 | 0.343 | 8.40E-08 | 1.3 |
| SPIRE1   | 3.56E-12 | 0.176025345  | 0.469 | 0.375 | 8.57E-08 | 1.3 |
| PEX2     | 3.56E-12 | 0.122578081  | 0.133 | 0.083 | 8.58E-08 | 1.3 |
| DDIT3    | 3.57E-12 | -0.366596199 | 0.087 | 0.138 | 8.60E-08 | 1.3 |
| TBL1X    | 3.61E-12 | 0.15304765   | 0.213 | 0.148 | 8.70E-08 | 1.3 |
| CALU     | 3.93E-12 | 0.140326917  | 0.358 | 0.271 | 9.46E-08 | 1.3 |
| THBS1    | 3.97E-12 | -0.251824642 | 0.042 | 0.085 | 9.58E-08 | 1.3 |
| SUMF1    | 4.00E-12 | 0.169257835  | 0.157 | 0.102 | 9.63E-08 | 1.3 |
| GNAQ     | 4.02E-12 | 0.188969745  | 0.375 | 0.291 | 9.70E-08 | 1.3 |
| MTRNR2L1 | 4.19E-12 | -0.279292113 | 0.137 | 0.196 | 1.01E-07 | 1.3 |
| MAP2K5   | 4.56E-12 | 0.13341324   | 0.17  | 0.112 | 1.10E-07 | 1.3 |
| FBXL5    | 4.76E-12 | 0.161960211  | 0.172 | 0.115 | 1.15E-07 | 1.3 |
| TUSC3    | 5.04E-12 | 0.155023345  | 0.192 | 0.131 | 1.21E-07 | 1.3 |
| NOS1AP   | 5.30E-12 | 0.136635051  | 0.208 | 0.144 | 1.28E-07 | 1.3 |
| PHB      | 5.37E-12 | 0.149860913  | 0.057 | 0.027 | 1.30E-07 | 1.3 |
| BBS9     | 5.57E-12 | 0.139243661  | 0.096 | 0.055 | 1.34E-07 | 1.3 |
| PRLR     | 5.88E-12 | 0.142609923  | 0.176 | 0.118 | 1.42E-07 | 1.3 |
| EGF      | 6.00E-12 | 0.121167499  | 0.113 | 0.067 | 1.45E-07 | 1.3 |
| RAB1A    | 6.05E-12 | -0.277765806 | 0.417 | 0.467 | 1.46E-07 | 1.3 |

|            |          |              |       |       |          |     |
|------------|----------|--------------|-------|-------|----------|-----|
| VPS13B     | 6.17E-12 | 0.176425179  | 0.213 | 0.15  | 1.49E-07 | 1.3 |
| PSMB6      | 6.42E-12 | 0.128891957  | 0.144 | 0.092 | 1.55E-07 | 1.3 |
| PLRG1      | 6.80E-12 | 0.128573257  | 0.161 | 0.106 | 1.64E-07 | 1.3 |
| TTC14      | 7.03E-12 | 0.137697274  | 0.107 | 0.063 | 1.69E-07 | 1.3 |
| PSMA7      | 7.25E-12 | 0.132316259  | 0.235 | 0.167 | 1.75E-07 | 1.3 |
| STAC       | 7.30E-12 | 0.120361817  | 0.069 | 0.035 | 1.76E-07 | 1.3 |
| PXDN       | 7.50E-12 | 0.15631094   | 0.157 | 0.103 | 1.81E-07 | 1.3 |
| LAMTOR5    | 7.62E-12 | 0.147225522  | 0.681 | 0.587 | 1.84E-07 | 1.3 |
| FBXL4      | 7.62E-12 | 0.148804695  | 0.12  | 0.073 | 1.84E-07 | 1.3 |
| PDIA3      | 7.66E-12 | -0.369010164 | 0.226 | 0.286 | 1.85E-07 | 1.3 |
| RP11-20I2C | 7.87E-12 | 0.10063953   | 0.055 | 0.026 | 1.90E-07 | 1.3 |
| TMC5       | 7.97E-12 | 0.123947091  | 0.077 | 0.041 | 1.92E-07 | 1.3 |
| FAM126B    | 8.09E-12 | -0.302381547 | 0.117 | 0.172 | 1.95E-07 | 1.3 |
| NAA20      | 8.14E-12 | 0.150372108  | 0.172 | 0.115 | 1.96E-07 | 1.3 |
| PSMB3      | 8.48E-12 | 0.145872718  | 0.104 | 0.061 | 2.04E-07 | 1.3 |
| PRMT2      | 8.96E-12 | 0.166857286  | 0.169 | 0.113 | 2.16E-07 | 1.3 |
| KATNBL1    | 9.02E-12 | 0.172127928  | 0.189 | 0.13  | 2.18E-07 | 1.3 |
| DPY30      | 9.14E-12 | 0.150086638  | 0.213 | 0.149 | 2.20E-07 | 1.3 |
| PPARA      | 9.43E-12 | 0.140216549  | 0.112 | 0.067 | 2.27E-07 | 1.3 |
| ANAPC13    | 9.97E-12 | 0.149054711  | 0.168 | 0.112 | 2.40E-07 | 1.3 |
| USP6NL     | 1.04E-11 | -0.295787216 | 0.162 | 0.222 | 2.51E-07 | 1.3 |
| ARHGEF11   | 1.04E-11 | 0.127116048  | 0.077 | 0.041 | 2.51E-07 | 1.3 |
| EMP1       | 1.07E-11 | -0.685392178 | 0.738 | 0.712 | 2.59E-07 | 1.3 |
| LPIN1      | 1.08E-11 | -0.422258599 | 0.306 | 0.356 | 2.60E-07 | 1.3 |
| FAM160A1   | 1.14E-11 | -0.282658772 | 0.687 | 0.705 | 2.74E-07 | 1.3 |
| PRKAR2A    | 1.15E-11 | 0.152014059  | 0.166 | 0.11  | 2.77E-07 | 1.3 |
| RP11-711K  | 1.15E-11 | 0.155295825  | 0.091 | 0.051 | 2.78E-07 | 1.3 |
| IRX3       | 1.15E-11 | 0.112836314  | 0.078 | 0.042 | 2.78E-07 | 1.3 |
| COX6C      | 1.21E-11 | 0.182652826  | 0.689 | 0.606 | 2.91E-07 | 1.3 |
| MIR222HG   | 1.24E-11 | -0.26866734  | 0.063 | 0.11  | 2.99E-07 | 1.3 |
| NFKB1      | 1.26E-11 | -0.404348799 | 0.364 | 0.414 | 3.03E-07 | 1.3 |
| GLCE       | 1.26E-11 | 0.109427735  | 0.077 | 0.041 | 3.03E-07 | 1.3 |
| ATP5EP2    | 1.28E-11 | 0.179553499  | 0.256 | 0.188 | 3.09E-07 | 1.3 |
| DIAPH2-AS  | 1.31E-11 | 0.12175121   | 0.064 | 0.032 | 3.17E-07 | 1.3 |
| DIAPH3     | 1.32E-11 | -0.320555306 | 0.088 | 0.14  | 3.18E-07 | 1.3 |
| PVRL2      | 1.34E-11 | -0.236646168 | 0.133 | 0.191 | 3.23E-07 | 1.3 |
| GTF2A2     | 1.37E-11 | 0.110319984  | 0.125 | 0.077 | 3.30E-07 | 1.3 |
| ADAMTS9-   | 1.37E-11 | 0.129080769  | 0.385 | 0.298 | 3.30E-07 | 1.3 |
| LCORL      | 1.45E-11 | 0.162800885  | 0.158 | 0.105 | 3.51E-07 | 1.3 |
| MAP3K13    | 1.47E-11 | -0.300564792 | 0.838 | 0.826 | 3.55E-07 | 1.3 |
| AKAP6      | 1.49E-11 | 0.124972675  | 0.079 | 0.043 | 3.60E-07 | 1.3 |
| C20orf24   | 1.49E-11 | 0.122465102  | 0.095 | 0.055 | 3.60E-07 | 1.3 |
| DENND1B    | 1.55E-11 | 0.158436499  | 0.176 | 0.118 | 3.74E-07 | 1.3 |
| FOS        | 1.68E-11 | 0.295991005  | 0.297 | 0.226 | 4.06E-07 | 1.3 |
| RPL37A     | 1.72E-11 | -0.127464633 | 0.973 | 0.986 | 4.14E-07 | 1.3 |
| MEST       | 1.72E-11 | -0.156098832 | 0.015 | 0.045 | 4.16E-07 | 1.3 |
| ZNF480     | 1.80E-11 | 0.111722192  | 0.079 | 0.043 | 4.34E-07 | 1.3 |

|            |          |              |       |       |          |     |
|------------|----------|--------------|-------|-------|----------|-----|
| EIF3I      | 1.94E-11 | 0.177498555  | 0.717 | 0.642 | 4.69E-07 | 1.3 |
| NR3C2      | 1.95E-11 | 0.147022068  | 0.16  | 0.107 | 4.70E-07 | 1.3 |
| FBXL20     | 2.09E-11 | 0.20521462   | 0.309 | 0.236 | 5.05E-07 | 1.3 |
| LRSAM1     | 2.09E-11 | 0.147946927  | 0.155 | 0.102 | 5.05E-07 | 1.3 |
| WEE1       | 2.11E-11 | -0.304456655 | 0.221 | 0.28  | 5.08E-07 | 1.3 |
| SNRPG      | 2.13E-11 | 0.154227382  | 0.613 | 0.521 | 5.13E-07 | 1.3 |
| C14orf1    | 2.18E-11 | 0.112205464  | 0.085 | 0.047 | 5.26E-07 | 1.3 |
| ASNS       | 2.29E-11 | 0.146866839  | 0.115 | 0.071 | 5.51E-07 | 1.3 |
| CIAPIN1    | 2.34E-11 | 0.120638691  | 0.122 | 0.076 | 5.65E-07 | 1.3 |
| CBFA2T2    | 2.40E-11 | 0.166634316  | 0.183 | 0.126 | 5.80E-07 | 1.3 |
| KIAA0556   | 2.44E-11 | 0.117312593  | 0.123 | 0.076 | 5.89E-07 | 1.3 |
| CAP1       | 2.47E-11 | 0.147000238  | 0.283 | 0.209 | 5.96E-07 | 1.3 |
| TRIB2      | 2.53E-11 | 0.112604461  | 0.084 | 0.047 | 6.10E-07 | 1.3 |
| SEC61G     | 2.56E-11 | 0.200726767  | 0.748 | 0.686 | 6.18E-07 | 1.3 |
| IKZF2      | 2.61E-11 | 0.107758747  | 0.073 | 0.039 | 6.29E-07 | 1.3 |
| 9-Sep      | 2.62E-11 | 0.152488381  | 0.167 | 0.112 | 6.32E-07 | 1.3 |
| GS1-24F4.2 | 2.82E-11 | 0.136286116  | 0.147 | 0.095 | 6.79E-07 | 1.3 |
| SPAG9      | 2.82E-11 | -0.324130664 | 0.298 | 0.353 | 6.80E-07 | 1.3 |
| SPG7       | 2.84E-11 | 0.122334858  | 0.086 | 0.048 | 6.84E-07 | 1.3 |
| BTF3L4     | 2.86E-11 | 0.135886509  | 0.344 | 0.265 | 6.89E-07 | 1.3 |
| PRELID1    | 3.03E-11 | 0.146470985  | 0.184 | 0.127 | 7.30E-07 | 1.3 |
| PTCHD1-AS  | 3.05E-11 | 0.178045461  | 0.143 | 0.093 | 7.34E-07 | 1.3 |
| WIPF2      | 3.12E-11 | 0.125022922  | 0.142 | 0.092 | 7.52E-07 | 1.3 |
| R3HCC1L    | 3.13E-11 | 0.157860555  | 0.166 | 0.112 | 7.55E-07 | 1.3 |
| ECHDC2     | 3.14E-11 | 0.170318878  | 0.156 | 0.103 | 7.58E-07 | 1.3 |
| JAK2       | 3.26E-11 | 0.184232212  | 0.116 | 0.072 | 7.86E-07 | 1.3 |
| C2orf68    | 3.26E-11 | 0.13433801   | 0.095 | 0.055 | 7.87E-07 | 1.3 |
| HILPDA     | 3.34E-11 | -0.441718822 | 0.202 | 0.263 | 8.04E-07 | 1.3 |
| ADAM17     | 3.40E-11 | -0.334342982 | 0.386 | 0.434 | 8.19E-07 | 1.3 |
| SERPINA3   | 3.47E-11 | 0.175244912  | 0.27  | 0.2   | 8.37E-07 | 1.3 |
| SLC7A11    | 3.48E-11 | 0.157697184  | 0.075 | 0.04  | 8.40E-07 | 1.3 |
| C6orf62    | 3.54E-11 | 0.135562212  | 0.222 | 0.158 | 8.53E-07 | 1.3 |
| URM1       | 3.78E-11 | 0.100347405  | 0.1   | 0.058 | 9.11E-07 | 1.3 |
| UVRAG      | 3.84E-11 | 0.171844727  | 0.486 | 0.393 | 9.26E-07 | 1.3 |
| ZNF226     | 3.97E-11 | 0.126154604  | 0.11  | 0.067 | 9.58E-07 | 1.3 |
| FAM107B    | 4.02E-11 | 0.146329255  | 0.302 | 0.225 | 9.70E-07 | 1.3 |
| CAAP1      | 4.05E-11 | 0.120916865  | 0.091 | 0.052 | 9.78E-07 | 1.3 |
| AK1        | 4.16E-11 | 0.104096855  | 0.031 | 0.011 | 1.00E-06 | 1.3 |
| FER        | 4.16E-11 | 0.158880861  | 0.267 | 0.196 | 1.00E-06 | 1.3 |
| CRTC3      | 4.56E-11 | 0.147737269  | 0.313 | 0.239 | 1.10E-06 | 1.3 |
| P4HA2      | 4.58E-11 | 0.113952357  | 0.106 | 0.063 | 1.10E-06 | 1.3 |
| RARS       | 4.73E-11 | 0.138226565  | 0.347 | 0.266 | 1.14E-06 | 1.3 |
| KIAA1147   | 4.83E-11 | 0.13754498   | 0.12  | 0.074 | 1.17E-06 | 1.3 |
| NRG1       | 4.95E-11 | 0.195074436  | 0.166 | 0.112 | 1.19E-06 | 1.3 |
| NT5C2      | 4.97E-11 | 0.133252908  | 0.443 | 0.351 | 1.20E-06 | 1.3 |
| HIVEP2     | 4.97E-11 | -0.393283879 | 0.332 | 0.38  | 1.20E-06 | 1.3 |
| C15orf57   | 5.00E-11 | 0.112802045  | 0.1   | 0.059 | 1.21E-06 | 1.3 |

|           |          |              |       |       |          |     |
|-----------|----------|--------------|-------|-------|----------|-----|
| RBM8A     | 5.42E-11 | 0.153817059  | 0.577 | 0.488 | 1.31E-06 | 1.3 |
| PACS1     | 5.44E-11 | 0.120301857  | 0.363 | 0.281 | 1.31E-06 | 1.3 |
| EZR       | 5.82E-11 | -0.333363766 | 0.272 | 0.324 | 1.40E-06 | 1.3 |
| SLC1A5    | 5.94E-11 | 0.100514039  | 0.072 | 0.038 | 1.43E-06 | 1.3 |
| NSUN4     | 6.18E-11 | 0.116011349  | 0.111 | 0.068 | 1.49E-06 | 1.3 |
| NSUN3     | 6.22E-11 | 0.10274507   | 0.077 | 0.042 | 1.50E-06 | 1.3 |
| ADAM10    | 6.57E-11 | 0.139006309  | 0.298 | 0.222 | 1.58E-06 | 1.3 |
| MPHOSPH8  | 6.81E-11 | 0.144976163  | 0.214 | 0.152 | 1.64E-06 | 1.3 |
| WWP1      | 6.82E-11 | 0.132474804  | 0.238 | 0.172 | 1.65E-06 | 1.3 |
| HNRNPF    | 6.92E-11 | 0.132316234  | 0.175 | 0.119 | 1.67E-06 | 1.3 |
| TCF25     | 7.04E-11 | 0.19385947   | 0.15  | 0.099 | 1.70E-06 | 1.3 |
| ZNF143    | 7.12E-11 | -0.258770437 | 0.111 | 0.163 | 1.72E-06 | 1.3 |
| VPS36     | 7.18E-11 | 0.151248588  | 0.145 | 0.096 | 1.73E-06 | 1.3 |
| TMEM87A   | 7.24E-11 | 0.133430843  | 0.43  | 0.339 | 1.75E-06 | 1.3 |
| MT2A      | 7.27E-11 | 0.912753112  | 0.105 | 0.065 | 1.75E-06 | 1.3 |
| TNC       | 7.37E-11 | 0.291539284  | 0.151 | 0.101 | 1.78E-06 | 1.3 |
| CNTNAP3   | 7.48E-11 | 0.117937904  | 0.09  | 0.052 | 1.80E-06 | 1.3 |
| AP3B1     | 7.79E-11 | 0.160151022  | 0.233 | 0.17  | 1.88E-06 | 1.3 |
| SUPT3H    | 7.97E-11 | 0.139022104  | 0.204 | 0.144 | 1.92E-06 | 1.3 |
| SLC39A8   | 8.06E-11 | 0.103210642  | 0.193 | 0.134 | 1.94E-06 | 1.3 |
| TATDN1    | 8.09E-11 | -0.261253196 | 0.267 | 0.323 | 1.95E-06 | 1.3 |
| HS6ST3    | 8.72E-11 | 0.135526273  | 0.062 | 0.031 | 2.10E-06 | 1.3 |
| PHKB      | 8.84E-11 | 0.162801876  | 0.246 | 0.18  | 2.13E-06 | 1.3 |
| ZBTB44    | 9.18E-11 | 0.14187682   | 0.143 | 0.094 | 2.21E-06 | 1.3 |
| RPL7L1    | 9.41E-11 | 0.122696352  | 0.173 | 0.119 | 2.27E-06 | 1.3 |
| SNAP23    | 9.76E-11 | 0.127751125  | 0.192 | 0.133 | 2.35E-06 | 1.3 |
| FAM13A    | 9.85E-11 | -0.532587516 | 0.346 | 0.388 | 2.38E-06 | 1.3 |
| ANKRD33B  | 1.01E-10 | -0.185777948 | 0.029 | 0.064 | 2.44E-06 | 1.3 |
| RFX3      | 1.02E-10 | 0.170478142  | 0.204 | 0.146 | 2.45E-06 | 1.3 |
| CREB5     | 1.02E-10 | -0.450912327 | 0.279 | 0.332 | 2.46E-06 | 1.3 |
| POLR2L    | 1.03E-10 | 0.142732865  | 0.057 | 0.028 | 2.49E-06 | 1.3 |
| TTLL5     | 1.05E-10 | 0.12763139   | 0.221 | 0.16  | 2.52E-06 | 1.3 |
| TWF1      | 1.06E-10 | 0.10175795   | 0.111 | 0.068 | 2.55E-06 | 1.3 |
| ZNHIT3    | 1.08E-10 | 0.14930821   | 0.258 | 0.191 | 2.61E-06 | 1.3 |
| GNA13     | 1.08E-10 | -0.263375848 | 0.157 | 0.213 | 2.61E-06 | 1.3 |
| UXS1      | 1.11E-10 | 0.129747946  | 0.133 | 0.085 | 2.68E-06 | 1.3 |
| ATXN10    | 1.20E-10 | 0.16311494   | 0.201 | 0.144 | 2.89E-06 | 1.3 |
| AP1B1     | 1.23E-10 | 0.15302818   | 0.056 | 0.028 | 2.96E-06 | 1.3 |
| DDX52     | 1.24E-10 | 0.133478722  | 0.151 | 0.101 | 2.98E-06 | 1.3 |
| ZNF235    | 1.24E-10 | 0.152748747  | 0.107 | 0.065 | 2.99E-06 | 1.3 |
| HDGF      | 1.26E-10 | 0.130179871  | 0.321 | 0.244 | 3.05E-06 | 1.3 |
| STK38L    | 1.29E-10 | -0.291395796 | 0.105 | 0.155 | 3.10E-06 | 1.3 |
| CDC42SE2  | 1.30E-10 | 0.166878582  | 0.276 | 0.207 | 3.14E-06 | 1.3 |
| C1orf21   | 1.33E-10 | -0.329912094 | 0.184 | 0.238 | 3.20E-06 | 1.3 |
| ENOX2     | 1.33E-10 | 0.126863443  | 0.083 | 0.047 | 3.20E-06 | 1.3 |
| RP11-712B | 1.35E-10 | 0.14639246   | 0.081 | 0.046 | 3.25E-06 | 1.3 |
| RAD50     | 1.41E-10 | 0.153814187  | 0.135 | 0.088 | 3.41E-06 | 1.3 |

|           |          |              |       |       |          |     |
|-----------|----------|--------------|-------|-------|----------|-----|
| MORF4L2   | 1.46E-10 | -0.227760589 | 0.738 | 0.749 | 3.53E-06 | 1.3 |
| SSB       | 1.49E-10 | 0.13667571   | 0.221 | 0.159 | 3.59E-06 | 1.3 |
| DSTN      | 1.50E-10 | 0.212126588  | 0.545 | 0.465 | 3.61E-06 | 1.3 |
| CARHSP1   | 1.62E-10 | 0.196931303  | 0.328 | 0.254 | 3.92E-06 | 1.3 |
| PSMC6     | 1.65E-10 | 0.147984551  | 0.39  | 0.31  | 3.99E-06 | 1.3 |
| ARL1      | 1.66E-10 | 0.155774498  | 0.343 | 0.266 | 4.00E-06 | 1.3 |
| INTS10    | 1.66E-10 | 0.151564549  | 0.148 | 0.099 | 4.00E-06 | 1.3 |
| NIF3L1    | 1.67E-10 | 0.11635598   | 0.091 | 0.054 | 4.03E-06 | 1.3 |
| NRDC      | 1.68E-10 | 0.13586048   | 0.222 | 0.161 | 4.06E-06 | 1.3 |
| MCF2L2    | 1.75E-10 | 0.145045442  | 0.205 | 0.145 | 4.22E-06 | 1.3 |
| IQCG      | 1.76E-10 | -0.328749159 | 0.178 | 0.232 | 4.24E-06 | 1.3 |
| PGM1      | 1.77E-10 | 0.214421383  | 0.16  | 0.108 | 4.26E-06 | 1.3 |
| MSI2      | 1.78E-10 | 0.170948227  | 0.246 | 0.181 | 4.29E-06 | 1.3 |
| GLUD1     | 1.86E-10 | -0.319846364 | 0.125 | 0.176 | 4.48E-06 | 1.3 |
| LAMC2     | 1.91E-10 | 0.115020415  | 0.354 | 0.275 | 4.60E-06 | 1.3 |
| CRADD     | 1.95E-10 | 0.118969038  | 0.136 | 0.089 | 4.71E-06 | 1.3 |
| PUM1      | 1.98E-10 | -0.28062347  | 0.492 | 0.521 | 4.77E-06 | 1.3 |
| TLE4      | 2.01E-10 | -0.333498857 | 0.368 | 0.418 | 4.85E-06 | 1.3 |
| FCHO2     | 2.01E-10 | 0.128221221  | 0.192 | 0.135 | 4.86E-06 | 1.3 |
| FOSL2     | 2.02E-10 | 0.145360215  | 0.226 | 0.165 | 4.87E-06 | 1.3 |
| PSTPIP2   | 2.02E-10 | 0.107948316  | 0.427 | 0.334 | 4.87E-06 | 1.3 |
| NCEH1     | 2.04E-10 | 0.160740754  | 0.271 | 0.203 | 4.92E-06 | 1.3 |
| ODAM      | 2.14E-10 | 0.110103899  | 0.043 | 0.019 | 5.17E-06 | 1.3 |
| EFNA1     | 2.29E-10 | 0.114058629  | 0.149 | 0.099 | 5.52E-06 | 1.3 |
| RP5-945F2 | 2.29E-10 | -0.368260987 | 0.048 | 0.087 | 5.53E-06 | 1.3 |
| SESN3     | 2.31E-10 | 0.188048242  | 0.114 | 0.071 | 5.58E-06 | 1.3 |
| CCDC6     | 2.44E-10 | -0.344094714 | 0.305 | 0.353 | 5.88E-06 | 1.3 |
| LINC00342 | 2.48E-10 | 0.122606182  | 0.092 | 0.055 | 5.97E-06 | 1.3 |
| LINC01549 | 2.54E-10 | 0.155513617  | 0.057 | 0.029 | 6.13E-06 | 1.3 |
| PTPN6     | 2.57E-10 | 0.104501638  | 0.07  | 0.038 | 6.19E-06 | 1.3 |
| C2CD2     | 2.73E-10 | 0.108649513  | 0.077 | 0.043 | 6.59E-06 | 1.3 |
| RP11-83A2 | 2.78E-10 | 0.149705343  | 0.156 | 0.106 | 6.71E-06 | 1.3 |
| AHI1      | 2.80E-10 | 0.152447246  | 0.257 | 0.19  | 6.75E-06 | 1.3 |
| GAPVD1    | 2.80E-10 | -0.246346892 | 0.168 | 0.223 | 6.75E-06 | 1.3 |
| HERC1     | 2.82E-10 | -0.344557789 | 0.362 | 0.403 | 6.81E-06 | 1.3 |
| SLC2A1    | 2.86E-10 | -0.251774837 | 0.05  | 0.09  | 6.89E-06 | 1.3 |
| CEP63     | 2.92E-10 | 0.136685412  | 0.115 | 0.072 | 7.04E-06 | 1.3 |
| SEC62     | 2.96E-10 | -0.291021972 | 0.611 | 0.631 | 7.14E-06 | 1.3 |
| CXCL16    | 2.98E-10 | 0.11228145   | 0.248 | 0.183 | 7.19E-06 | 1.3 |
| CXCR4     | 2.99E-10 | -0.572128612 | 0.262 | 0.311 | 7.20E-06 | 1.3 |
| KLK10     | 2.99E-10 | 0.125509162  | 0.086 | 0.05  | 7.22E-06 | 1.3 |
| SLC25A5   | 3.07E-10 | 0.160799019  | 0.195 | 0.139 | 7.41E-06 | 1.3 |
| KIAA2026  | 3.09E-10 | 0.11175734   | 0.188 | 0.132 | 7.45E-06 | 1.3 |
| ZNF121    | 3.10E-10 | 0.134213991  | 0.121 | 0.077 | 7.47E-06 | 1.3 |
| EIF4E     | 3.23E-10 | -0.320486237 | 0.352 | 0.396 | 7.79E-06 | 1.3 |
| NSRP1     | 3.24E-10 | 0.151179459  | 0.33  | 0.256 | 7.81E-06 | 1.3 |
| PNISR     | 3.30E-10 | 0.118386759  | 0.837 | 0.741 | 7.96E-06 | 1.3 |



|           |          |              |       |       |          |     |
|-----------|----------|--------------|-------|-------|----------|-----|
| HPS5      | 3.40E-10 | 0.114275334  | 0.277 | 0.207 | 8.19E-06 | 1.3 |
| CCNB1IP1  | 3.43E-10 | -0.260483742 | 0.331 | 0.382 | 8.27E-06 | 1.3 |
| USP34     | 3.46E-10 | 0.169186303  | 0.654 | 0.562 | 8.33E-06 | 1.3 |
| RFX7      | 3.55E-10 | 0.168529112  | 0.19  | 0.135 | 8.56E-06 | 1.3 |
| AHR       | 3.57E-10 | 0.171615313  | 0.254 | 0.189 | 8.61E-06 | 1.3 |
| CUL5      | 3.59E-10 | 0.114899451  | 0.174 | 0.12  | 8.66E-06 | 1.3 |
| SERPINB1  | 3.62E-10 | 0.159129505  | 0.14  | 0.093 | 8.73E-06 | 1.3 |
| GMFB      | 3.68E-10 | 0.113363845  | 0.132 | 0.086 | 8.87E-06 | 1.3 |
| TLR2      | 3.83E-10 | 0.113192944  | 0.314 | 0.237 | 9.23E-06 | 1.3 |
| PRRG4     | 3.96E-10 | 0.114345129  | 0.248 | 0.183 | 9.54E-06 | 1.3 |
| RGS2      | 3.99E-10 | -0.693001891 | 0.174 | 0.224 | 9.61E-06 | 1.3 |
| TMCC1     | 4.01E-10 | 0.134403623  | 0.333 | 0.257 | 9.66E-06 | 1.3 |
| ACTL6A    | 4.09E-10 | 0.111245148  | 0.086 | 0.05  | 9.86E-06 | 1.3 |
| ZFP36L1   | 4.16E-10 | 0.194676561  | 0.589 | 0.503 | 1.00E-05 | 1.3 |
| SERAC1    | 4.22E-10 | -0.229940354 | 0.05  | 0.089 | 1.02E-05 | 1.3 |
| MFSD11    | 4.28E-10 | 0.134200506  | 0.102 | 0.062 | 1.03E-05 | 1.3 |
| SIPA1L2   | 4.31E-10 | 0.110453286  | 0.104 | 0.064 | 1.04E-05 | 1.3 |
| FRMD3     | 4.63E-10 | 0.155281954  | 0.125 | 0.081 | 1.12E-05 | 1.3 |
| SLC38A2   | 4.64E-10 | 0.102434674  | 0.222 | 0.16  | 1.12E-05 | 1.3 |
| TNRC6A    | 4.77E-10 | -0.268545631 | 0.211 | 0.266 | 1.15E-05 | 1.3 |
| GNPTAB    | 4.98E-10 | 0.145986105  | 0.147 | 0.099 | 1.20E-05 | 1.3 |
| RPA1      | 5.09E-10 | 0.120196118  | 0.09  | 0.053 | 1.23E-05 | 1.3 |
| LINC01183 | 5.10E-10 | 0.129058554  | 0.087 | 0.051 | 1.23E-05 | 1.3 |
| NF1       | 5.11E-10 | 0.136450586  | 0.529 | 0.432 | 1.23E-05 | 1.3 |
| TMED3     | 5.15E-10 | 0.119407148  | 0.1   | 0.061 | 1.24E-05 | 1.3 |
| ELMOD2    | 5.42E-10 | 0.107068293  | 0.083 | 0.048 | 1.31E-05 | 1.3 |
| ZNF518A   | 5.59E-10 | 0.132949331  | 0.234 | 0.171 | 1.35E-05 | 1.3 |
| GSTP1     | 5.66E-10 | 0.248739127  | 0.107 | 0.067 | 1.37E-05 | 1.3 |
| MICAL3    | 5.74E-10 | -0.351768403 | 0.263 | 0.315 | 1.38E-05 | 1.3 |
| SCFD2     | 5.75E-10 | 0.104545459  | 0.067 | 0.036 | 1.39E-05 | 1.3 |
| TACC2     | 5.77E-10 | 0.130337097  | 0.19  | 0.135 | 1.39E-05 | 1.3 |
| SEL1L     | 6.18E-10 | -0.232407945 | 0.061 | 0.102 | 1.49E-05 | 1.3 |
| IQCB1     | 6.27E-10 | 0.128562284  | 0.133 | 0.087 | 1.51E-05 | 1.3 |
| MIRLET7B  | 6.37E-10 | 0.100501936  | 0.055 | 0.028 | 1.54E-05 | 1.3 |
| C16orf72  | 6.41E-10 | -0.247381347 | 0.108 | 0.156 | 1.55E-05 | 1.3 |
| UBR1      | 6.54E-10 | 0.140172536  | 0.169 | 0.117 | 1.58E-05 | 1.3 |
| YWHAB     | 6.92E-10 | 0.119815679  | 0.337 | 0.26  | 1.67E-05 | 1.3 |
| WIPF3     | 6.94E-10 | 0.103236253  | 0.073 | 0.041 | 1.67E-05 | 1.3 |
| LGALS3    | 6.99E-10 | 0.193757859  | 0.225 | 0.167 | 1.68E-05 | 1.3 |
| PDE1C     | 7.09E-10 | 0.148104832  | 0.111 | 0.07  | 1.71E-05 | 1.3 |
| LBP       | 7.15E-10 | -0.178609459 | 0.014 | 0.041 | 1.72E-05 | 1.3 |
| VPS50     | 7.17E-10 | 0.121093737  | 0.085 | 0.05  | 1.73E-05 | 1.3 |
| TTC9C     | 7.20E-10 | 0.135501229  | 0.191 | 0.135 | 1.74E-05 | 1.3 |
| SLC30A6   | 7.21E-10 | 0.112363274  | 0.084 | 0.049 | 1.74E-05 | 1.3 |
| AGO4      | 7.59E-10 | 0.132997029  | 0.14  | 0.094 | 1.83E-05 | 1.3 |
| PTPRA     | 7.90E-10 | 0.139235932  | 0.192 | 0.136 | 1.90E-05 | 1.3 |
| RNF114    | 8.12E-10 | -0.253192527 | 0.112 | 0.16  | 1.96E-05 | 1.3 |

|           |          |              |       |       |          |     |
|-----------|----------|--------------|-------|-------|----------|-----|
| BBS4      | 8.26E-10 | 0.114768377  | 0.076 | 0.043 | 1.99E-05 | 1.3 |
| CAMK1D    | 8.30E-10 | -0.328653809 | 0.114 | 0.162 | 2.00E-05 | 1.3 |
| LDLR      | 8.37E-10 | 0.160217563  | 0.212 | 0.154 | 2.02E-05 | 1.3 |
| CLK1      | 8.43E-10 | -0.297120842 | 0.355 | 0.404 | 2.03E-05 | 1.3 |
| OPHN1     | 8.68E-10 | 0.121713715  | 0.275 | 0.207 | 2.09E-05 | 1.3 |
| SNX14     | 8.73E-10 | 0.116820244  | 0.124 | 0.08  | 2.11E-05 | 1.3 |
| PITPNC1   | 8.78E-10 | 0.138834796  | 0.262 | 0.198 | 2.12E-05 | 1.3 |
| RPS6KC1   | 8.99E-10 | 0.122094277  | 0.12  | 0.077 | 2.17E-05 | 1.3 |
| HERPUD1   | 9.26E-10 | -0.306124464 | 0.157 | 0.209 | 2.23E-05 | 1.3 |
| HIST1H4E  | 1.01E-09 | 0.108043558  | 0.14  | 0.093 | 2.44E-05 | 1.3 |
| TFG       | 1.04E-09 | -0.262547489 | 0.273 | 0.325 | 2.50E-05 | 1.3 |
| TIMM9     | 1.04E-09 | -0.255336224 | 0.182 | 0.234 | 2.52E-05 | 1.3 |
| ASXL2     | 1.05E-09 | 0.14267291   | 0.107 | 0.067 | 2.53E-05 | 1.3 |
| TTC9      | 1.08E-09 | 0.148777857  | 0.241 | 0.18  | 2.60E-05 | 1.3 |
| ITCH      | 1.11E-09 | 0.130930914  | 0.42  | 0.333 | 2.67E-05 | 1.3 |
| MDM4      | 1.11E-09 | 0.136391692  | 0.325 | 0.253 | 2.67E-05 | 1.3 |
| HEATR5A   | 1.13E-09 | 0.117519638  | 0.088 | 0.053 | 2.71E-05 | 1.3 |
| ALG13     | 1.15E-09 | 0.146377906  | 0.134 | 0.09  | 2.76E-05 | 1.3 |
| COBLL1    | 1.15E-09 | 0.156788812  | 0.167 | 0.117 | 2.78E-05 | 1.3 |
| C5orf56   | 1.16E-09 | -0.192275295 | 0.089 | 0.137 | 2.80E-05 | 1.3 |
| SEL1L3    | 1.17E-09 | 0.128074935  | 0.081 | 0.047 | 2.82E-05 | 1.3 |
| SMG6      | 1.19E-09 | 0.134609388  | 0.202 | 0.145 | 2.86E-05 | 1.3 |
| SYPL1     | 1.23E-09 | 0.115137545  | 0.478 | 0.388 | 2.97E-05 | 1.3 |
| IK        | 1.24E-09 | 0.134913021  | 0.27  | 0.206 | 2.99E-05 | 1.3 |
| INO80     | 1.28E-09 | 0.122903031  | 0.206 | 0.149 | 3.10E-05 | 1.3 |
| DPH3      | 1.29E-09 | 0.11505284   | 0.15  | 0.102 | 3.11E-05 | 1.3 |
| PSMB4     | 1.36E-09 | 0.140339137  | 0.185 | 0.132 | 3.29E-05 | 1.3 |
| MAPKAP1   | 1.40E-09 | 0.117955097  | 0.133 | 0.088 | 3.37E-05 | 1.3 |
| ARHGEF10  | 1.49E-09 | -0.330057289 | 0.335 | 0.38  | 3.60E-05 | 1.3 |
| GDE1      | 1.58E-09 | 0.115598322  | 0.098 | 0.06  | 3.80E-05 | 1.3 |
| ARHGAP21  | 1.59E-09 | 0.131409667  | 0.292 | 0.225 | 3.83E-05 | 1.3 |
| PILRB     | 1.60E-09 | 0.151939725  | 0.081 | 0.047 | 3.86E-05 | 1.3 |
| LGALS8    | 1.62E-09 | 0.15000078   | 0.159 | 0.11  | 3.91E-05 | 1.3 |
| MYO5C     | 1.62E-09 | 0.117221895  | 0.14  | 0.094 | 3.92E-05 | 1.3 |
| RPL4      | 1.65E-09 | -0.164511398 | 0.951 | 0.959 | 3.98E-05 | 1.3 |
| RP11-142C | 1.68E-09 | 0.137033556  | 0.157 | 0.109 | 4.05E-05 | 1.3 |
| SNX29     | 1.71E-09 | 0.139248531  | 0.14  | 0.094 | 4.12E-05 | 1.3 |
| DARS      | 1.71E-09 | 0.122604372  | 0.391 | 0.31  | 4.13E-05 | 1.3 |
| VPS29     | 1.75E-09 | 0.151518047  | 0.45  | 0.368 | 4.21E-05 | 1.3 |
| RP11-793A | 1.75E-09 | 0.120853965  | 0.063 | 0.034 | 4.22E-05 | 1.3 |
| STAT5B    | 1.84E-09 | 0.148908399  | 0.229 | 0.17  | 4.44E-05 | 1.3 |
| GCC2      | 1.85E-09 | 0.110630195  | 0.387 | 0.306 | 4.47E-05 | 1.3 |
| FAM193A   | 1.94E-09 | 0.127942621  | 0.188 | 0.134 | 4.67E-05 | 1.3 |
| IRF6      | 2.06E-09 | -0.301450249 | 0.185 | 0.234 | 4.96E-05 | 1.3 |
| MSH3      | 2.17E-09 | 0.130802217  | 0.138 | 0.093 | 5.24E-05 | 1.3 |
| MTMR2     | 2.20E-09 | 0.120165714  | 0.146 | 0.099 | 5.31E-05 | 1.3 |
| NAALADL2  | 2.20E-09 | 0.204634666  | 0.394 | 0.323 | 5.31E-05 | 1.3 |

|           |          |              |       |       |           |     |
|-----------|----------|--------------|-------|-------|-----------|-----|
| LSM3      | 2.26E-09 | 0.146643812  | 0.377 | 0.302 | 5.44E-05  | 1.3 |
| RSBN1L    | 2.26E-09 | -0.239535174 | 0.089 | 0.134 | 5.45E-05  | 1.3 |
| TMC1      | 2.27E-09 | 0.100847123  | 0.053 | 0.027 | 5.48E-05  | 1.3 |
| DYRK1A    | 2.31E-09 | -0.325451997 | 0.326 | 0.37  | 5.58E-05  | 1.3 |
| GRB14     | 2.33E-09 | -0.297915553 | 0.54  | 0.57  | 5.61E-05  | 1.3 |
| MKLN1     | 2.47E-09 | 0.181127761  | 0.686 | 0.616 | 5.95E-05  | 1.3 |
| TAF1B     | 2.47E-09 | 0.117017971  | 0.127 | 0.083 | 5.97E-05  | 1.3 |
| RPSA      | 2.48E-09 | -0.197685965 | 0.92  | 0.921 | 5.97E-05  | 1.3 |
| FSTL1     | 2.49E-09 | 0.128765585  | 0.15  | 0.103 | 6.01E-05  | 1.3 |
| TFCP2L1   | 2.49E-09 | 0.185741024  | 0.191 | 0.138 | 6.01E-05  | 1.3 |
| DIRC2     | 2.52E-09 | 0.129026942  | 0.097 | 0.061 | 6.07E-05  | 1.3 |
| SLC16A1-A | 2.53E-09 | 0.150884856  | 0.149 | 0.103 | 6.11E-05  | 1.3 |
| ITGB4     | 2.62E-09 | 0.122732674  | 0.077 | 0.045 | 6.31E-05  | 1.3 |
| TRAPPC13  | 2.63E-09 | 0.105654691  | 0.085 | 0.05  | 6.35E-05  | 1.3 |
| STX8      | 2.64E-09 | 0.134623581  | 0.245 | 0.185 | 6.37E-05  | 1.3 |
| SLCO3A1   | 2.65E-09 | 0.108615899  | 0.307 | 0.236 | 6.40E-05  | 1.3 |
| MCTP2     | 2.66E-09 | 0.134525495  | 0.19  | 0.136 | 6.42E-05  | 1.3 |
| DENND1A   | 2.67E-09 | 0.133743647  | 0.265 | 0.201 | 6.45E-05  | 1.3 |
| SLIT2     | 2.72E-09 | 0.107080538  | 0.066 | 0.037 | 6.56E-05  | 1.3 |
| CTDSP2    | 2.97E-09 | 0.113741142  | 0.234 | 0.173 | 7.16E-05  | 1.3 |
| PUM2      | 3.03E-09 | -0.260529461 | 0.319 | 0.369 | 7.31E-05  | 1.3 |
| CPD       | 3.08E-09 | 0.140924262  | 0.267 | 0.205 | 7.43E-05  | 1.3 |
| SERPINA1  | 3.20E-09 | 0.12038309   | 0.055 | 0.029 | 7.71E-05  | 1.3 |
| CMTM4     | 3.28E-09 | 0.10737413   | 0.135 | 0.091 | 7.90E-05  | 1.3 |
| AK4       | 3.33E-09 | 0.113777355  | 0.24  | 0.179 | 8.03E-05  | 1.3 |
| RAPH1     | 3.36E-09 | 0.103861823  | 0.238 | 0.177 | 8.09E-05  | 1.3 |
| FBXL17    | 3.41E-09 | 0.101896493  | 0.231 | 0.172 | 8.22E-05  | 1.3 |
| PDS5B     | 3.43E-09 | 0.129656386  | 0.338 | 0.265 | 8.28E-05  | 1.3 |
| ATXN1     | 3.52E-09 | -0.341238964 | 0.329 | 0.374 | 8.50E-05  | 1.3 |
| ARL8B     | 3.59E-09 | -0.258722301 | 0.215 | 0.266 | 8.65E-05  | 1.3 |
| NDUFA12   | 3.60E-09 | 0.127846976  | 0.281 | 0.217 | 8.69E-05  | 1.3 |
| VPS8      | 3.67E-09 | 0.119441086  | 0.114 | 0.074 | 8.85E-05  | 1.3 |
| SGMS2     | 3.76E-09 | -0.298256626 | 0.143 | 0.191 | 9.07E-05  | 1.3 |
| C20orf194 | 3.79E-09 | 0.149258017  | 0.2   | 0.147 | 9.15E-05  | 1.3 |
| TGM2      | 3.81E-09 | 0.116555394  | 0.121 | 0.08  | 9.19E-05  | 1.3 |
| CBLB      | 3.97E-09 | 0.154777598  | 0.279 | 0.215 | 9.56E-05  | 1.3 |
| RPL5      | 4.03E-09 | -0.134788706 | 0.968 | 0.976 | 9.71E-05  | 1.3 |
| TTC17     | 4.11E-09 | 0.149468555  | 0.338 | 0.266 | 9.90E-05  | 1.3 |
| EDN1      | 4.17E-09 | -0.348448628 | 0.177 | 0.225 | 0.0001005 | 1.3 |
| ZFYVE9    | 4.17E-09 | 0.144404508  | 0.143 | 0.098 | 0.0001006 | 1.3 |
| ZBTB1     | 4.31E-09 | 0.113827907  | 0.12  | 0.079 | 0.0001039 | 1.3 |
| IDE       | 4.38E-09 | 0.128014583  | 0.104 | 0.067 | 0.0001057 | 1.3 |
| TCF7L1    | 4.78E-09 | -0.308626508 | 0.299 | 0.348 | 0.0001152 | 1.3 |
| TSG101    | 4.82E-09 | 0.124346684  | 0.219 | 0.162 | 0.0001161 | 1.3 |
| YARS      | 4.84E-09 | -0.299775552 | 0.245 | 0.292 | 0.0001167 | 1.3 |
| XPO4      | 5.08E-09 | 0.13524102   | 0.173 | 0.124 | 0.0001225 | 1.3 |
| ZNF33B    | 5.09E-09 | 0.142215534  | 0.228 | 0.171 | 0.0001226 | 1.3 |

|            |          |              |       |       |           |     |
|------------|----------|--------------|-------|-------|-----------|-----|
| CPEB4      | 5.22E-09 | 0.138749053  | 0.226 | 0.168 | 0.0001258 | 1.3 |
| ZNF267     | 5.40E-09 | -0.21716213  | 0.14  | 0.189 | 0.0001301 | 1.3 |
| FBXO32     | 5.42E-09 | 0.171924705  | 0.469 | 0.396 | 0.0001307 | 1.3 |
| YBX3       | 5.45E-09 | 0.159651143  | 0.329 | 0.26  | 0.0001315 | 1.3 |
| PIM1       | 5.57E-09 | -0.10071851  | 0.01  | 0.033 | 0.0001343 | 1.3 |
| C5orf17    | 6.02E-09 | 0.149417927  | 0.091 | 0.056 | 0.0001452 | 1.3 |
| TMEM65     | 6.33E-09 | 0.124501695  | 0.222 | 0.165 | 0.0001526 | 1.3 |
| ANKS1A     | 6.45E-09 | 0.131340131  | 0.173 | 0.123 | 0.0001555 | 1.3 |
| HNRNPH2    | 6.57E-09 | 0.113383676  | 0.274 | 0.209 | 0.0001585 | 1.3 |
| CACNA2D1   | 6.70E-09 | 0.124279234  | 0.066 | 0.037 | 0.0001616 | 1.3 |
| BROX       | 6.82E-09 | 0.101402144  | 0.173 | 0.123 | 0.0001645 | 1.3 |
| SERTAD2    | 6.83E-09 | -0.282358949 | 0.169 | 0.218 | 0.0001646 | 1.3 |
| SAR1B      | 6.89E-09 | -0.42280559  | 0.428 | 0.465 | 0.000166  | 1.3 |
| FXR1       | 7.10E-09 | -0.25438483  | 0.401 | 0.437 | 0.0001712 | 1.3 |
| MRPL20     | 7.12E-09 | 0.109390808  | 0.096 | 0.06  | 0.0001718 | 1.3 |
| BBOX1      | 7.22E-09 | -0.3369786   | 0.226 | 0.278 | 0.000174  | 1.3 |
| PWWP2A     | 7.44E-09 | 0.1207204    | 0.096 | 0.061 | 0.0001793 | 1.3 |
| RAP1GDS1   | 7.54E-09 | 0.121307906  | 0.114 | 0.075 | 0.0001818 | 1.3 |
| MAP4K4     | 8.24E-09 | 0.121929503  | 0.414 | 0.332 | 0.0001986 | 1.3 |
| ZZZ3       | 8.29E-09 | 0.104711163  | 0.22  | 0.163 | 0.0001998 | 1.3 |
| CYB5R3     | 8.50E-09 | 0.108485594  | 0.104 | 0.067 | 0.000205  | 1.3 |
| MLLT3      | 8.70E-09 | 0.130416519  | 0.19  | 0.139 | 0.0002099 | 1.3 |
| MAN1A2     | 8.73E-09 | 0.152765523  | 0.222 | 0.167 | 0.0002105 | 1.3 |
| C10orf76   | 8.96E-09 | 0.170531119  | 0.169 | 0.122 | 0.000216  | 1.3 |
| UBE2N      | 8.99E-09 | 0.101294     | 0.267 | 0.202 | 0.0002168 | 1.3 |
| NALCN      | 9.25E-09 | 0.134679326  | 0.193 | 0.141 | 0.0002232 | 1.3 |
| NUB1       | 9.29E-09 | 0.335842264  | 0.336 | 0.277 | 0.000224  | 1.3 |
| RASSF3     | 9.62E-09 | -0.227752029 | 0.115 | 0.161 | 0.000232  | 1.3 |
| ERP29      | 9.64E-09 | 0.130986014  | 0.118 | 0.078 | 0.0002325 | 1.3 |
| RP11-266O  | 9.76E-09 | -0.195255468 | 0.028 | 0.058 | 0.0002353 | 1.3 |
| SHANK2     | 1.06E-08 | 0.123733232  | 0.242 | 0.181 | 0.000256  | 1.3 |
| DENND4A    | 1.07E-08 | -0.312268852 | 0.496 | 0.529 | 0.0002579 | 1.3 |
| LRIG1      | 1.08E-08 | 0.111784598  | 0.294 | 0.229 | 0.0002598 | 1.3 |
| CTC-471J1. | 1.09E-08 | -0.232862025 | 0.765 | 0.754 | 0.0002623 | 1.3 |
| BAIAP2L1   | 1.09E-08 | -0.204277216 | 0.958 | 0.97  | 0.0002625 | 1.3 |
| GPX1       | 1.11E-08 | 0.126840269  | 0.064 | 0.036 | 0.0002684 | 1.3 |
| RPL14      | 1.11E-08 | -0.137593671 | 0.975 | 0.983 | 0.0002685 | 1.3 |
| IFFO2      | 1.14E-08 | -0.234748312 | 0.108 | 0.154 | 0.0002759 | 1.3 |
| PIAS1      | 1.17E-08 | -0.263834558 | 0.388 | 0.433 | 0.0002815 | 1.3 |
| RAB13      | 1.20E-08 | 0.143482912  | 0.179 | 0.131 | 0.0002887 | 1.3 |
| MTHFD1L    | 1.22E-08 | 0.116385815  | 0.341 | 0.268 | 0.0002939 | 1.3 |
| EZH1       | 1.22E-08 | 0.114041415  | 0.129 | 0.087 | 0.000294  | 1.3 |
| TXNRD1     | 1.24E-08 | 0.213408094  | 0.466 | 0.385 | 0.000299  | 1.3 |
| TOP1       | 1.26E-08 | -0.280739557 | 0.309 | 0.354 | 0.0003038 | 1.3 |
| CDK5RAP2   | 1.28E-08 | 0.109077491  | 0.086 | 0.053 | 0.0003076 | 1.3 |
| KDSR       | 1.29E-08 | 0.119792791  | 0.141 | 0.097 | 0.000311  | 1.3 |
| STK38      | 1.38E-08 | -0.241471287 | 0.216 | 0.266 | 0.0003331 | 1.3 |

|           |          |              |       |       |           |     |
|-----------|----------|--------------|-------|-------|-----------|-----|
| ATP2A2    | 1.41E-08 | 0.137248128  | 0.3   | 0.233 | 0.0003402 | 1.3 |
| ZNF43     | 1.43E-08 | 0.133085511  | 0.178 | 0.129 | 0.0003444 | 1.3 |
| HMGCS1    | 1.43E-08 | 0.166683409  | 0.281 | 0.219 | 0.0003447 | 1.3 |
| CAPNS1    | 1.48E-08 | 0.145198485  | 0.088 | 0.055 | 0.0003571 | 1.3 |
| SYNJ2     | 1.50E-08 | 0.123158088  | 0.366 | 0.294 | 0.0003613 | 1.3 |
| ZNF721    | 1.51E-08 | 0.133726102  | 0.26  | 0.2   | 0.0003632 | 1.3 |
| KANSL1    | 1.53E-08 | 0.150586368  | 0.444 | 0.361 | 0.0003686 | 1.3 |
| GPATCH8   | 1.58E-08 | 0.119064158  | 0.306 | 0.239 | 0.0003798 | 1.3 |
| TEAD1     | 1.58E-08 | -0.302774098 | 0.339 | 0.38  | 0.0003818 | 1.3 |
| SND1      | 1.59E-08 | 0.121817389  | 0.374 | 0.301 | 0.0003833 | 1.3 |
| MRPL47    | 1.66E-08 | 0.107255561  | 0.23  | 0.172 | 0.0004012 | 1.3 |
| RPS9      | 1.72E-08 | 0.26196762   | 0.349 | 0.282 | 0.0004137 | 1.3 |
| ADNP      | 1.73E-08 | 0.129686067  | 0.367 | 0.295 | 0.0004164 | 1.3 |
| SASH1     | 1.73E-08 | 0.129963432  | 0.371 | 0.298 | 0.0004169 | 1.3 |
| WDR7      | 1.73E-08 | 0.114067047  | 0.075 | 0.044 | 0.0004171 | 1.3 |
| ATP5J     | 1.78E-08 | 0.138814875  | 0.561 | 0.475 | 0.000428  | 1.3 |
| LGALS1    | 1.82E-08 | 0.131040397  | 0.103 | 0.067 | 0.0004393 | 1.3 |
| LINC00657 | 1.83E-08 | 0.111333827  | 0.192 | 0.141 | 0.000441  | 1.3 |
| PAN3      | 1.84E-08 | -0.229912225 | 0.558 | 0.581 | 0.0004426 | 1.3 |
| IFIT2     | 1.87E-08 | -0.283220225 | 0.02  | 0.047 | 0.0004517 | 1.3 |
| RBM39     | 1.88E-08 | -0.19794752  | 0.436 | 0.468 | 0.0004539 | 1.3 |
| EPS15     | 1.90E-08 | 0.111900086  | 0.284 | 0.221 | 0.0004572 | 1.3 |
| HS2ST1    | 1.90E-08 | 0.106508779  | 0.056 | 0.03  | 0.0004582 | 1.3 |
| ZNF638    | 1.95E-08 | 0.138886639  | 0.485 | 0.402 | 0.0004708 | 1.3 |
| GLTSCR1L  | 1.96E-08 | 0.144853611  | 0.178 | 0.13  | 0.0004722 | 1.3 |
| MPRIP     | 1.97E-08 | -0.303962379 | 0.195 | 0.239 | 0.0004752 | 1.3 |
| FOXO1     | 1.98E-08 | 0.125228932  | 0.299 | 0.235 | 0.0004768 | 1.3 |
| SERINC3   | 2.08E-08 | 0.132778551  | 0.222 | 0.168 | 0.0005004 | 1.3 |
| MAT2A     | 2.27E-08 | 0.103438106  | 0.087 | 0.054 | 0.0005472 | 1.3 |
| DISC1     | 2.35E-08 | 0.125097666  | 0.134 | 0.092 | 0.0005671 | 1.3 |
| RBPM5     | 2.36E-08 | -0.207975096 | 0.794 | 0.787 | 0.0005691 | 1.3 |
| ARID4B    | 2.38E-08 | -0.244126739 | 0.478 | 0.512 | 0.0005745 | 1.3 |
| TMEM245   | 2.43E-08 | 0.110181724  | 0.13  | 0.088 | 0.000587  | 1.3 |
| ATXN3     | 2.46E-08 | 0.12225695   | 0.207 | 0.153 | 0.0005926 | 1.3 |
| FEM1B     | 2.50E-08 | -0.212848059 | 0.094 | 0.136 | 0.0006034 | 1.3 |
| GTPBP10   | 2.65E-08 | 0.100549137  | 0.133 | 0.091 | 0.00064   | 1.3 |
| RP11-481C | 2.70E-08 | -0.149211955 | 0.039 | 0.071 | 0.0006516 | 1.3 |
| DNER      | 2.74E-08 | 0.187863951  | 0.098 | 0.064 | 0.000661  | 1.3 |
| FNBP4     | 2.74E-08 | -0.24072931  | 0.428 | 0.466 | 0.0006618 | 1.3 |
| PIN4      | 2.81E-08 | 0.116891891  | 0.342 | 0.275 | 0.0006781 | 1.3 |
| SMARCD1   | 2.82E-08 | 0.108159033  | 0.094 | 0.06  | 0.000679  | 1.3 |
| NFKBIZ    | 2.87E-08 | -0.197866967 | 0.798 | 0.796 | 0.0006932 | 1.3 |
| EIF2AK2   | 2.93E-08 | 0.124204265  | 0.137 | 0.096 | 0.0007055 | 1.3 |
| ATL3      | 2.95E-08 | 0.10886805   | 0.151 | 0.106 | 0.0007118 | 1.3 |
| SMG1      | 2.96E-08 | -0.301500394 | 0.225 | 0.27  | 0.0007129 | 1.3 |
| ALDOA     | 3.00E-08 | 0.238654758  | 0.153 | 0.11  | 0.0007243 | 1.3 |
| CSTB      | 3.07E-08 | 0.236738977  | 0.226 | 0.175 | 0.0007407 | 1.3 |

|           |          |              |       |       |           |     |
|-----------|----------|--------------|-------|-------|-----------|-----|
| MT1E      | 3.12E-08 | 0.402267897  | 0.06  | 0.034 | 0.0007533 | 1.3 |
| DDX5      | 3.27E-08 | 0.100834804  | 0.574 | 0.483 | 0.0007881 | 1.3 |
| DYNC1I2   | 3.35E-08 | 0.123253134  | 0.431 | 0.358 | 0.0008085 | 1.3 |
| MAPKAPK2  | 3.40E-08 | -0.192730961 | 0.095 | 0.138 | 0.0008189 | 1.3 |
| KIAA1143  | 3.47E-08 | 0.10101561   | 0.15  | 0.105 | 0.0008367 | 1.3 |
| ZRANB2    | 3.51E-08 | 0.118755106  | 0.394 | 0.321 | 0.0008452 | 1.3 |
| TRA2A     | 3.56E-08 | -0.265072399 | 0.385 | 0.421 | 0.0008574 | 1.3 |
| CASP7     | 3.56E-08 | 0.114022089  | 0.205 | 0.152 | 0.0008574 | 1.3 |
| ZRANB1    | 3.78E-08 | -0.208206235 | 0.124 | 0.169 | 0.0009111 | 1.3 |
| ATP11A    | 3.79E-08 | 0.130211478  | 0.108 | 0.071 | 0.000915  | 1.3 |
| NFE2L3    | 3.84E-08 | -0.251554091 | 0.065 | 0.102 | 0.0009258 | 1.3 |
| NHSL1     | 3.89E-08 | 0.170116007  | 0.245 | 0.188 | 0.0009382 | 1.3 |
| WDR48     | 4.08E-08 | -0.225166542 | 0.152 | 0.198 | 0.0009842 | 1.3 |
| PCCA      | 4.11E-08 | 0.159488089  | 0.198 | 0.147 | 0.0009921 | 1.3 |
| FGFBP1    | 4.24E-08 | 0.238518066  | 0.1   | 0.066 | 0.001022  | 1.3 |
| PPL       | 4.27E-08 | 0.139961552  | 0.127 | 0.087 | 0.0010284 | 1.3 |
| CCNG2     | 4.34E-08 | -0.225860478 | 0.119 | 0.163 | 0.0010463 | 1.3 |
| ZNF407    | 4.34E-08 | 0.145112203  | 0.146 | 0.103 | 0.0010467 | 1.3 |
| C3orf52   | 4.36E-08 | -0.171961865 | 0.044 | 0.077 | 0.0010522 | 1.3 |
| ARHGAP10  | 4.42E-08 | -0.252250314 | 0.104 | 0.146 | 0.001065  | 1.3 |
| SAMD5     | 4.46E-08 | 0.117741654  | 0.085 | 0.053 | 0.0010746 | 1.3 |
| TRNAU1AP  | 4.46E-08 | 0.119620201  | 0.322 | 0.257 | 0.0010749 | 1.3 |
| DLG5      | 4.47E-08 | 0.135179825  | 0.211 | 0.157 | 0.0010789 | 1.3 |
| GPCPD1    | 4.63E-08 | 0.159957029  | 0.158 | 0.115 | 0.0011169 | 1.3 |
| LGR4      | 4.73E-08 | 0.103054881  | 0.374 | 0.305 | 0.0011395 | 1.3 |
| ZFR       | 4.74E-08 | 0.114536468  | 0.438 | 0.361 | 0.001142  | 1.3 |
| KDM3B     | 4.93E-08 | 0.154163004  | 0.216 | 0.164 | 0.0011882 | 1.3 |
| KLF3      | 5.01E-08 | 0.132808631  | 0.148 | 0.104 | 0.0012073 | 1.3 |
| PTEN      | 5.02E-08 | -0.194605691 | 0.838 | 0.854 | 0.0012109 | 1.3 |
| TASP1     | 5.03E-08 | 0.127051392  | 0.189 | 0.139 | 0.0012138 | 1.3 |
| H1FO      | 5.05E-08 | 0.125640713  | 0.21  | 0.158 | 0.0012182 | 1.3 |
| ANPEP     | 5.17E-08 | 0.125031155  | 0.061 | 0.035 | 0.0012473 | 1.3 |
| MINK1     | 5.17E-08 | 0.122597941  | 0.177 | 0.13  | 0.0012476 | 1.3 |
| BIRC6-AS2 | 5.21E-08 | 0.115594741  | 0.277 | 0.216 | 0.0012563 | 1.3 |
| ARF6      | 5.25E-08 | -0.26955944  | 0.156 | 0.2   | 0.0012648 | 1.3 |
| SPEN      | 5.46E-08 | -0.220113048 | 0.236 | 0.284 | 0.0013165 | 1.3 |
| ACAP2     | 5.57E-08 | 0.1009194    | 0.191 | 0.142 | 0.0013421 | 1.3 |
| HERC2     | 5.68E-08 | 0.116947745  | 0.11  | 0.074 | 0.0013692 | 1.3 |
| MTCH2     | 5.68E-08 | 0.107344369  | 0.101 | 0.066 | 0.0013693 | 1.3 |
| ELP2      | 5.94E-08 | -0.197414516 | 0.134 | 0.179 | 0.001432  | 1.3 |
| CDKAL1    | 5.95E-08 | 0.120944092  | 0.292 | 0.23  | 0.0014343 | 1.3 |
| PPP6R3    | 6.04E-08 | -0.250993409 | 0.404 | 0.439 | 0.0014564 | 1.3 |
| NHP2      | 6.38E-08 | 0.100127704  | 0.042 | 0.021 | 0.0015395 | 1.3 |
| APOO      | 6.40E-08 | -0.123784034 | 0.976 | 0.984 | 0.0015443 | 1.3 |
| ZNF592    | 6.63E-08 | -0.208751582 | 0.094 | 0.134 | 0.0015995 | 1.3 |
| TMCO4     | 6.68E-08 | 0.112449062  | 0.127 | 0.088 | 0.0016113 | 1.3 |
| FBXO11    | 6.77E-08 | -0.274604208 | 0.355 | 0.396 | 0.0016327 | 1.3 |

|           |          |              |       |       |           |     |
|-----------|----------|--------------|-------|-------|-----------|-----|
| RBPJ      | 6.95E-08 | -0.245731325 | 0.373 | 0.412 | 0.0016758 | 1.3 |
| CNNM2     | 7.31E-08 | 0.10349407   | 0.077 | 0.047 | 0.0017617 | 1.3 |
| RP11-608O | 7.62E-08 | -0.202128539 | 0.736 | 0.737 | 0.0018374 | 1.3 |
| C1orf56   | 7.65E-08 | 0.117073311  | 0.197 | 0.148 | 0.0018445 | 1.3 |
| COX7C     | 7.73E-08 | -0.139822581 | 0.887 | 0.888 | 0.0018646 | 1.3 |
| MYO5A     | 7.97E-08 | 0.12844197   | 0.113 | 0.076 | 0.0019207 | 1.3 |
| ELMO2     | 8.20E-08 | -0.11236194  | 0.041 | 0.072 | 0.0019768 | 1.3 |
| TBC1D8    | 8.21E-08 | -0.263729035 | 0.375 | 0.416 | 0.0019806 | 1.3 |
| NUMB      | 8.32E-08 | 0.130081505  | 0.501 | 0.426 | 0.0020054 | 1.3 |
| GJC3      | 8.41E-08 | -0.201798131 | 0.06  | 0.094 | 0.0020282 | 1.3 |
| SDK1      | 8.88E-08 | 0.156851928  | 0.117 | 0.079 | 0.0021411 | 1.3 |
| ACTN1     | 8.91E-08 | -0.324448371 | 0.242 | 0.287 | 0.002148  | 1.3 |
| KIAA1328  | 8.98E-08 | 0.123559382  | 0.117 | 0.079 | 0.0021645 | 1.3 |
| AUTS2     | 9.05E-08 | 0.136165789  | 0.628 | 0.541 | 0.002182  | 1.3 |
| MYH14     | 9.05E-08 | 0.12212835   | 0.207 | 0.157 | 0.0021831 | 1.3 |
| KLHL5     | 9.53E-08 | 0.134556296  | 0.216 | 0.164 | 0.0022979 | 1.3 |
| KCTD3     | 9.72E-08 | -0.260617563 | 0.167 | 0.212 | 0.0023432 | 1.3 |
| WDR60     | 9.83E-08 | 0.150627538  | 0.156 | 0.113 | 0.0023711 | 1.3 |
| CBR4      | 9.99E-08 | 0.115327576  | 0.314 | 0.25  | 0.0024096 | 1.3 |
| LURAP1L   | 1.02E-07 | 0.111915534  | 0.267 | 0.206 | 0.0024493 | 1.3 |
| CLEC7A    | 1.06E-07 | 0.101574531  | 0.162 | 0.116 | 0.0025668 | 1.3 |
| EGR1      | 1.12E-07 | 0.195047467  | 0.102 | 0.068 | 0.0027125 | 1.3 |
| C9orf3    | 1.13E-07 | 0.101700418  | 0.207 | 0.154 | 0.002723  | 1.3 |
| ATP5L     | 1.13E-07 | 0.114967595  | 0.879 | 0.849 | 0.0027238 | 1.3 |
| NSMAF     | 1.15E-07 | 0.106820054  | 0.122 | 0.084 | 0.002769  | 1.3 |
| HDAC1     | 1.19E-07 | 0.102166938  | 0.144 | 0.102 | 0.0028756 | 1.3 |
| MYO1C     | 1.22E-07 | 0.110350712  | 0.056 | 0.032 | 0.0029325 | 1.3 |
| DAPL1     | 1.26E-07 | -0.100798462 | 0.029 | 0.057 | 0.0030464 | 1.3 |
| AKAP12    | 1.31E-07 | -0.343563266 | 0.02  | 0.043 | 0.0031684 | 1.3 |
| PLA2G16   | 1.31E-07 | 0.12333326   | 0.162 | 0.118 | 0.0031705 | 1.3 |
| RAB10     | 1.35E-07 | 0.140706981  | 0.325 | 0.262 | 0.0032562 | 1.3 |
| CTNND1    | 1.35E-07 | -0.246414499 | 0.291 | 0.329 | 0.003259  | 1.3 |
| UBE3A     | 1.37E-07 | -0.21739843  | 0.291 | 0.338 | 0.0032921 | 1.3 |
| PITPNA    | 1.42E-07 | 0.125772648  | 0.178 | 0.131 | 0.0034326 | 1.3 |
| ADGRL3-AS | 1.45E-07 | -0.208710627 | 0.651 | 0.671 | 0.003492  | 1.3 |
| RGS6      | 1.46E-07 | 0.125063342  | 0.18  | 0.134 | 0.0035324 | 1.3 |
| LSAMP     | 1.48E-07 | 0.128594019  | 0.294 | 0.234 | 0.003572  | 1.3 |
| TCN1      | 1.50E-07 | 0.212745644  | 0.053 | 0.03  | 0.0036095 | 1.3 |
| SEC24B    | 1.51E-07 | -0.249218848 | 0.267 | 0.311 | 0.0036319 | 1.3 |
| KIF13B    | 1.53E-07 | -0.325097847 | 0.265 | 0.305 | 0.0036913 | 1.3 |
| VPS41     | 1.55E-07 | 0.10728014   | 0.106 | 0.071 | 0.0037289 | 1.3 |
| UACA      | 1.56E-07 | 0.126656371  | 0.203 | 0.154 | 0.0037537 | 1.3 |
| IER2      | 1.57E-07 | 0.179356024  | 0.09  | 0.059 | 0.0037962 | 1.3 |
| IFNAR2    | 1.58E-07 | 0.12565546   | 0.354 | 0.285 | 0.0038025 | 1.3 |
| ZNF254    | 1.59E-07 | 0.110182966  | 0.197 | 0.148 | 0.0038415 | 1.3 |
| ZCCHC2    | 1.61E-07 | 0.125557156  | 0.358 | 0.292 | 0.0038891 | 1.3 |
| CCL4      | 1.63E-07 | -1.269192278 | 0.062 | 0.096 | 0.0039224 | 1.3 |

|           |          |              |       |       |           |     |
|-----------|----------|--------------|-------|-------|-----------|-----|
| WDR43     | 1.71E-07 | -0.219190372 | 0.083 | 0.12  | 0.0041177 | 1.3 |
| CCDC174   | 1.72E-07 | 0.103927244  | 0.224 | 0.171 | 0.0041562 | 1.3 |
| RP11-511B | 1.74E-07 | -0.206723487 | 0.574 | 0.595 | 0.0041871 | 1.3 |
| KHDRBS1   | 1.75E-07 | -0.229253646 | 0.26  | 0.306 | 0.0042312 | 1.3 |
| DIS3L2    | 1.76E-07 | 0.101162075  | 0.135 | 0.095 | 0.004243  | 1.3 |
| ZNF544    | 1.78E-07 | 0.114513022  | 0.129 | 0.09  | 0.0042825 | 1.3 |
| APPL2     | 1.78E-07 | 0.105588594  | 0.098 | 0.065 | 0.004293  | 1.3 |
| HS3ST4    | 1.79E-07 | 0.145364389  | 0.398 | 0.328 | 0.0043165 | 1.3 |
| PRR14L    | 1.86E-07 | 0.110206304  | 0.115 | 0.079 | 0.0044965 | 1.3 |
| MBOAT1    | 1.90E-07 | -0.163295195 | 0.045 | 0.076 | 0.0045751 | 1.3 |
| BAZ2B     | 1.90E-07 | 0.128771133  | 0.503 | 0.42  | 0.0045908 | 1.3 |
| TNFAIP3   | 1.92E-07 | -0.297684346 | 0.22  | 0.265 | 0.0046342 | 1.3 |
| SPDYE16   | 1.93E-07 | 0.108109513  | 0.127 | 0.089 | 0.0046467 | 1.3 |
| SBF2      | 1.98E-07 | -0.242406126 | 0.658 | 0.658 | 0.0047799 | 1.3 |
| APTR      | 2.00E-07 | -0.16139584  | 0.057 | 0.09  | 0.0048309 | 1.3 |
| ODF2L     | 2.02E-07 | 0.113463577  | 0.176 | 0.13  | 0.0048631 | 1.3 |
| TAF3      | 2.06E-07 | 0.107928025  | 0.087 | 0.056 | 0.0049681 | 1.3 |
| TRPC1     | 2.07E-07 | 0.110739376  | 0.067 | 0.04  | 0.0049843 | 1.3 |
| BCL2      | 2.07E-07 | -0.22651586  | 0.099 | 0.139 | 0.0049876 | 1.3 |
| DHRS3     | 2.09E-07 | 0.104062174  | 0.119 | 0.082 | 0.0050392 | 1.3 |
| SS18      | 2.11E-07 | 0.140152031  | 0.183 | 0.138 | 0.0050838 | 1.3 |
| ZBTB16    | 2.13E-07 | 0.131313724  | 0.322 | 0.262 | 0.0051474 | 1.3 |
| RUFY3     | 2.14E-07 | 0.103982042  | 0.213 | 0.163 | 0.005166  | 1.3 |
| USP32     | 2.15E-07 | 0.133439792  | 0.24  | 0.187 | 0.0051792 | 1.3 |
| AFF4      | 2.16E-07 | -0.23458745  | 0.406 | 0.438 | 0.0052152 | 1.3 |
| RP11-286E | 2.18E-07 | -0.169730609 | 0.04  | 0.069 | 0.0052547 | 1.3 |
| NCK2      | 2.21E-07 | 0.104294111  | 0.202 | 0.152 | 0.0053371 | 1.3 |
| RABGAP1   | 2.24E-07 | 0.114598639  | 0.356 | 0.285 | 0.0054126 | 1.3 |
| FLOT1     | 2.35E-07 | 0.120109103  | 0.143 | 0.103 | 0.0056554 | 1.3 |
| RUBCN     | 2.35E-07 | -0.110215599 | 0.044 | 0.075 | 0.0056767 | 1.3 |
| RAB6A     | 2.46E-07 | 0.100442212  | 0.342 | 0.276 | 0.0059209 | 1.3 |
| MAP7D1    | 2.51E-07 | -0.193316988 | 0.103 | 0.143 | 0.0060598 | 1.3 |
| SCFD1     | 2.53E-07 | 0.114781169  | 0.269 | 0.212 | 0.0061119 | 1.3 |
| CACNB2    | 2.55E-07 | 0.135359506  | 0.176 | 0.132 | 0.0061368 | 1.3 |
| MVP       | 2.55E-07 | 0.11168171   | 0.092 | 0.061 | 0.0061592 | 1.3 |
| UBAP2     | 2.57E-07 | 0.118962147  | 0.228 | 0.175 | 0.0062044 | 1.3 |
| SPINK5    | 2.58E-07 | -0.145040622 | 0.007 | 0.024 | 0.0062199 | 1.3 |
| LRRC37A3  | 2.67E-07 | 0.110083885  | 0.153 | 0.112 | 0.0064357 | 1.3 |
| NFIA      | 2.77E-07 | 0.116061938  | 0.161 | 0.118 | 0.0066863 | 1.3 |
| ASH1L     | 2.79E-07 | 0.118588267  | 0.562 | 0.477 | 0.0067218 | 1.3 |
| PHC3      | 2.84E-07 | 0.124124176  | 0.222 | 0.171 | 0.0068496 | 1.3 |
| CHMP2A    | 2.92E-07 | 0.101633532  | 0.081 | 0.052 | 0.007051  | 1.3 |
| CDK13     | 2.95E-07 | 0.111868313  | 0.404 | 0.331 | 0.0071071 | 1.3 |
| NTRK2     | 2.95E-07 | -0.219206632 | 0.156 | 0.199 | 0.0071102 | 1.3 |
| CLCN3     | 2.97E-07 | 0.11936057   | 0.226 | 0.175 | 0.007163  | 1.3 |
| FAM172A   | 3.06E-07 | -0.273452144 | 0.752 | 0.747 | 0.0073765 | 1.3 |
| HIST2H2BE | 3.09E-07 | 0.105961289  | 0.121 | 0.085 | 0.007439  | 1.3 |



|            |          |              |       |       |           |     |
|------------|----------|--------------|-------|-------|-----------|-----|
| WSB1       | 3.09E-07 | -0.248120014 | 0.309 | 0.347 | 0.007452  | 1.3 |
| MAGT1      | 3.16E-07 | -0.221308949 | 0.148 | 0.19  | 0.00761   | 1.3 |
| PTK7       | 3.16E-07 | 0.105431666  | 0.119 | 0.083 | 0.0076298 | 1.3 |
| AGO3       | 3.28E-07 | 0.104453697  | 0.291 | 0.233 | 0.0079138 | 1.3 |
| KLF10      | 3.30E-07 | 0.10047245   | 0.136 | 0.097 | 0.0079567 | 1.3 |
| REL        | 3.34E-07 | -0.248396413 | 0.207 | 0.248 | 0.0080447 | 1.3 |
| GBAS       | 3.40E-07 | 0.104658407  | 0.231 | 0.178 | 0.0082021 | 1.3 |
| OAT        | 3.51E-07 | 0.101079545  | 0.425 | 0.355 | 0.0084593 | 1.3 |
| C8orf4     | 3.52E-07 | 0.101808247  | 0.191 | 0.145 | 0.0084862 | 1.3 |
| TBCK       | 3.58E-07 | 0.124037866  | 0.156 | 0.115 | 0.0086325 | 1.3 |
| NPC1       | 3.62E-07 | -0.286842206 | 0.296 | 0.333 | 0.0087271 | 1.3 |
| DDR2       | 3.67E-07 | 0.135773268  | 0.147 | 0.107 | 0.008843  | 1.3 |
| TMEM57     | 3.75E-07 | -0.213345873 | 0.141 | 0.182 | 0.0090316 | 1.3 |
| SH3GL1     | 3.76E-07 | -0.179009685 | 0.065 | 0.098 | 0.0090749 | 1.3 |
| RPS27A     | 3.84E-07 | -0.102773232 | 0.979 | 0.988 | 0.0092477 | 1.3 |
| RP11-65112 | 3.85E-07 | 0.133125381  | 0.074 | 0.046 | 0.0092751 | 1.3 |
| ADCY9      | 3.95E-07 | 0.112204742  | 0.047 | 0.026 | 0.0095263 | 1.3 |
| TNRC6B     | 3.98E-07 | 0.109659138  | 0.475 | 0.399 | 0.0095972 | 1.3 |
| FTO        | 4.08E-07 | 0.133250556  | 0.279 | 0.222 | 0.0098403 | 1.3 |
| RGS10      | 4.09E-07 | 0.11069357   | 0.15  | 0.109 | 0.0098528 | 1.3 |
| PHYKPL     | 4.16E-07 | 0.103884699  | 0.075 | 0.047 | 0.0100242 | 1.3 |
| MPRIP-AS1  | 4.17E-07 | -0.150461361 | 0.036 | 0.063 | 0.0100535 | 1.3 |
| SDCCAG8    | 4.29E-07 | 0.117884676  | 0.221 | 0.171 | 0.0103421 | 1.3 |
| PTP4A2     | 4.41E-07 | -0.182178966 | 0.088 | 0.124 | 0.0106405 | 1.3 |
| RAD51B     | 4.45E-07 | 0.144818002  | 0.266 | 0.21  | 0.0107361 | 1.3 |
| TRIM56     | 4.53E-07 | 0.103635378  | 0.244 | 0.19  | 0.0109119 | 1.3 |
| ARHGEF7    | 4.57E-07 | -0.229029862 | 0.142 | 0.183 | 0.0110224 | 1.3 |
| RHBDD1     | 4.57E-07 | 0.103704381  | 0.158 | 0.116 | 0.011027  | 1.3 |
| MBOAT2     | 4.75E-07 | 0.101667494  | 0.147 | 0.107 | 0.0114455 | 1.3 |
| IKKB       | 4.80E-07 | 0.132072591  | 0.147 | 0.107 | 0.0115797 | 1.3 |
| LARP1      | 4.86E-07 | 0.104888337  | 0.215 | 0.167 | 0.0117248 | 1.3 |
| NEDD4      | 4.91E-07 | 0.134543858  | 0.111 | 0.077 | 0.0118507 | 1.3 |
| CLASP1     | 5.17E-07 | 0.130167268  | 0.3   | 0.242 | 0.012468  | 1.3 |
| COMT       | 5.27E-07 | 0.106724391  | 0.075 | 0.047 | 0.0127151 | 1.3 |
| HDAC4      | 5.36E-07 | 0.141613383  | 0.06  | 0.036 | 0.0129178 | 1.3 |
| PARVA      | 5.42E-07 | 0.115016358  | 0.176 | 0.132 | 0.0130698 | 1.3 |
| RNF150     | 5.47E-07 | -0.219247993 | 0.107 | 0.147 | 0.0131818 | 1.3 |
| SETD5      | 5.70E-07 | -0.231601999 | 0.504 | 0.524 | 0.0137561 | 1.3 |
| MLH3       | 5.81E-07 | 0.106989236  | 0.128 | 0.091 | 0.0140052 | 1.3 |
| MSRA       | 5.87E-07 | 0.118872601  | 0.093 | 0.062 | 0.0141565 | 1.3 |
| FGD6       | 6.10E-07 | 0.144535176  | 0.293 | 0.239 | 0.0147009 | 1.3 |
| MYL12A     | 6.17E-07 | -0.261760234 | 0.86  | 0.858 | 0.0148716 | 1.3 |
| CASP4      | 6.31E-07 | 0.112768899  | 0.339 | 0.274 | 0.0152204 | 1.3 |
| RNF168     | 6.34E-07 | 0.107631629  | 0.103 | 0.071 | 0.015283  | 1.3 |
| FERMT2     | 6.42E-07 | -0.206433805 | 0.132 | 0.172 | 0.0154837 | 1.3 |
| REEP3      | 6.45E-07 | 0.101654542  | 0.288 | 0.231 | 0.0155567 | 1.3 |
| MYO9B      | 6.57E-07 | -0.25491422  | 0.172 | 0.213 | 0.0158384 | 1.3 |

|           |          |              |       |       |           |     |
|-----------|----------|--------------|-------|-------|-----------|-----|
| FMO2      | 6.81E-07 | -0.16874332  | 0.089 | 0.127 | 0.0164266 | 1.3 |
| RPL26L1   | 6.91E-07 | 0.103724727  | 0.215 | 0.165 | 0.0166587 | 1.3 |
| B4GALT1   | 6.94E-07 | 0.115731645  | 0.46  | 0.385 | 0.0167241 | 1.3 |
| CHMP4B    | 6.94E-07 | -0.195159732 | 0.096 | 0.133 | 0.0167391 | 1.3 |
| EP300     | 7.27E-07 | 0.136026358  | 0.175 | 0.133 | 0.0175404 | 1.3 |
| AC072062. | 7.43E-07 | -0.221417124 | 0.508 | 0.527 | 0.0179215 | 1.3 |
| ERBB2IP   | 7.54E-07 | 0.114761553  | 0.318 | 0.257 | 0.0181699 | 1.3 |
| EIF3L     | 8.09E-07 | -0.169375707 | 0.763 | 0.761 | 0.0194956 | 1.3 |
| XRN1      | 8.28E-07 | -0.229658097 | 0.312 | 0.35  | 0.0199758 | 1.3 |
| ALPL      | 8.46E-07 | -0.157103707 | 0.038 | 0.066 | 0.0203924 | 1.3 |
| PFDN4     | 8.59E-07 | 0.11072783   | 0.568 | 0.493 | 0.0207175 | 1.3 |
| KLRD1     | 8.69E-07 | -0.167412566 | 0.05  | 0.08  | 0.0209473 | 1.3 |
| EEF2      | 8.80E-07 | 0.212241554  | 0.495 | 0.429 | 0.0212291 | 1.3 |
| C11orf1   | 8.92E-07 | -0.20468772  | 0.151 | 0.19  | 0.0215102 | 1.3 |
| SNHG8     | 8.96E-07 | -0.221810094 | 0.287 | 0.328 | 0.0215951 | 1.3 |
| PTPRM     | 9.14E-07 | 0.170175023  | 0.208 | 0.162 | 0.0220497 | 1.3 |
| RP11-138A | 9.34E-07 | 0.103060235  | 0.09  | 0.06  | 0.0225301 | 1.3 |
| JAZF1     | 9.39E-07 | -0.153209938 | 0.094 | 0.131 | 0.0226375 | 1.3 |
| MT-ND4L   | 9.43E-07 | -0.220378496 | 0.528 | 0.536 | 0.0227392 | 1.3 |
| NEK10     | 9.55E-07 | 0.117742896  | 0.151 | 0.11  | 0.0230239 | 1.3 |
| ARF4      | 1.01E-06 | -0.234452028 | 0.648 | 0.654 | 0.0244071 | 1.3 |
| MCTS1     | 1.05E-06 | 0.105795649  | 0.336 | 0.274 | 0.0254026 | 1.3 |
| GCNT1     | 1.08E-06 | -0.218723982 | 0.068 | 0.1   | 0.0260113 | 1.3 |
| ARPP19    | 1.09E-06 | -0.281979097 | 0.313 | 0.341 | 0.0263105 | 1.3 |
| LDHC      | 1.11E-06 | -0.118543479 | 0.012 | 0.031 | 0.0266476 | 1.3 |
| ABCC4     | 1.14E-06 | -0.122403802 | 0.02  | 0.042 | 0.027404  | 1.3 |
| CCNL1     | 1.14E-06 | -0.209497922 | 0.368 | 0.407 | 0.0274478 | 1.3 |
| ZNF106    | 1.21E-06 | 0.111844775  | 0.148 | 0.109 | 0.0290661 | 1.3 |
| RNF144B   | 1.23E-06 | 0.107788112  | 0.398 | 0.333 | 0.0297153 | 1.3 |
| REPS1     | 1.23E-06 | 0.108992509  | 0.313 | 0.254 | 0.0297268 | 1.3 |
| SLC25A25  | 1.26E-06 | 0.152861694  | 0.186 | 0.143 | 0.0304474 | 1.3 |
| RHPN2     | 1.26E-06 | 0.103688927  | 0.332 | 0.271 | 0.0304486 | 1.3 |
| KLHL20    | 1.28E-06 | 0.124202263  | 0.098 | 0.067 | 0.0309739 | 1.3 |
| NLGN4X    | 1.32E-06 | 0.12329379   | 0.102 | 0.071 | 0.0318246 | 1.3 |
| WWTR1     | 1.35E-06 | -0.225241872 | 0.385 | 0.416 | 0.0325328 | 1.3 |
| WASF1     | 1.36E-06 | 0.104093385  | 0.077 | 0.05  | 0.0328199 | 1.3 |
| AGTPBP1   | 1.37E-06 | 0.11501159   | 0.107 | 0.074 | 0.0330125 | 1.3 |
| SMAD2     | 1.38E-06 | 0.138128929  | 0.277 | 0.225 | 0.0332124 | 1.3 |
| PSME2     | 1.44E-06 | 0.190325125  | 0.395 | 0.339 | 0.0347737 | 1.3 |
| RAB8B     | 1.46E-06 | -0.230685974 | 0.137 | 0.175 | 0.0352663 | 1.3 |
| PYGB      | 1.47E-06 | 0.110906435  | 0.072 | 0.046 | 0.0353864 | 1.3 |
| SNX18     | 1.49E-06 | -0.126025464 | 0.04  | 0.067 | 0.0359265 | 1.3 |
| ZCCHC7    | 1.50E-06 | 0.123480828  | 0.441 | 0.376 | 0.0361276 | 1.3 |
| ROCK1     | 1.54E-06 | 0.118682527  | 0.244 | 0.194 | 0.0370655 | 1.3 |
| CCL5      | 1.57E-06 | -0.105180136 | 0.012 | 0.03  | 0.0378992 | 1.3 |
| SUCLG2    | 1.83E-06 | 0.129116318  | 0.124 | 0.089 | 0.0440697 | 1.3 |
| TBC1D9    | 1.83E-06 | 0.112036253  | 0.264 | 0.211 | 0.0442196 | 1.3 |

|           |          |              |       |       |           |     |
|-----------|----------|--------------|-------|-------|-----------|-----|
| IMMP2L    | 1.88E-06 | 0.151368036  | 0.361 | 0.302 | 0.0453829 | 1.3 |
| CLDN1     | 1.96E-06 | -0.49392221  | 0.397 | 0.418 | 0.0472789 | 1.3 |
| ZCCHC8    | 2.03E-06 | -0.179135057 | 0.106 | 0.142 | 0.048986  | 1.3 |
| RP11-241G | 2.07E-06 | -0.103694773 | 0.025 | 0.048 | 0.0499049 | 1.3 |
| CEPT1     | 2.12E-06 | 0.11128851   | 0.329 | 0.271 | 0.051013  | 1.3 |
| IDH2      | 2.12E-06 | 0.103540076  | 0.112 | 0.079 | 0.0511485 | 1.3 |
| UPF2      | 2.13E-06 | 0.108557656  | 0.328 | 0.27  | 0.0512583 | 1.3 |
| AC016831. | 2.14E-06 | 0.137778852  | 0.298 | 0.241 | 0.051558  | 1.3 |
| CHD1      | 2.19E-06 | -0.202819538 | 0.202 | 0.242 | 0.052799  | 1.3 |
| UBE2E2    | 2.19E-06 | 0.126884862  | 0.453 | 0.384 | 0.0528253 | 1.3 |
| C1orf132  | 2.22E-06 | 0.111923716  | 0.089 | 0.06  | 0.0534844 | 1.3 |
| RP11-486O | 2.34E-06 | -0.12739668  | 0.036 | 0.061 | 0.0564813 | 1.3 |
| CHD6      | 2.40E-06 | -0.216233876 | 0.268 | 0.304 | 0.0578625 | 1.3 |
| MYO1D     | 2.41E-06 | 0.11337736   | 0.31  | 0.252 | 0.0580912 | 1.3 |
| SWAP70    | 2.45E-06 | -0.26386043  | 0.278 | 0.313 | 0.0590958 | 1.3 |
| R3HDM1    | 2.47E-06 | 0.116349892  | 0.081 | 0.054 | 0.0595198 | 1.3 |
| BTF3      | 2.49E-06 | -0.173221567 | 0.948 | 0.946 | 0.0600352 | 1.3 |
| TTY14     | 2.51E-06 | -0.288260526 | 0.275 | 0.312 | 0.0605945 | 1.3 |
| MYO9A     | 2.51E-06 | 0.107858204  | 0.34  | 0.278 | 0.0606295 | 1.3 |
| PPA2      | 2.54E-06 | 0.103773019  | 0.239 | 0.19  | 0.0612691 | 1.3 |
| CDKL5     | 2.60E-06 | -0.204670059 | 0.065 | 0.096 | 0.0627031 | 1.3 |
| RCAN3     | 2.60E-06 | -0.169328015 | 0.226 | 0.174 | 0.0627644 | 1.3 |
| ARIH1     | 2.62E-06 | -0.205177835 | 0.394 | 0.431 | 0.0632261 | 1.3 |
| DYRK3     | 2.70E-06 | -0.145385141 | 0.054 | 0.083 | 0.0651895 | 1.3 |
| MED15     | 2.75E-06 | -0.14735718  | 0.114 | 0.151 | 0.0663144 | 1.3 |
| ZNF37A    | 2.79E-06 | 0.110828076  | 0.117 | 0.084 | 0.0673687 | 1.3 |
| CRNDE     | 2.84E-06 | 0.118552954  | 0.094 | 0.065 | 0.0684002 | 1.3 |
| SH3PXD2B  | 2.88E-06 | 0.102114182  | 0.162 | 0.122 | 0.0695437 | 1.3 |
| PIGA      | 3.12E-06 | -0.149677821 | 0.061 | 0.091 | 0.0752991 | 1.3 |
| RIC1      | 3.23E-06 | 0.118352225  | 0.136 | 0.1   | 0.0779729 | 1.3 |
| RALGAPA1  | 3.24E-06 | 0.127022097  | 0.274 | 0.223 | 0.0780303 | 1.3 |
| SNRPB     | 3.24E-06 | 0.110523212  | 0.105 | 0.074 | 0.0781533 | 1.3 |
| RPF2      | 3.56E-06 | -0.187225859 | 0.154 | 0.192 | 0.0857948 | 1.3 |
| METTL5    | 3.64E-06 | 0.107870381  | 0.138 | 0.103 | 0.0877139 | 1.3 |
| PLCG2     | 3.89E-06 | 0.131505002  | 0.086 | 0.058 | 0.0939183 | 1.3 |
| SHROOM3   | 4.00E-06 | -0.269536228 | 0.515 | 0.526 | 0.0965577 | 1.3 |
| NAA25     | 4.03E-06 | -0.348606336 | 0.3   | 0.325 | 0.0972856 | 1.3 |
| MACROD2   | 4.06E-06 | 0.109510247  | 0.303 | 0.249 | 0.0978257 | 1.3 |
| ATP6V0A1  | 4.33E-06 | -0.167549868 | 0.143 | 0.182 | 0.1044949 | 1.3 |
| UBAP1     | 4.40E-06 | -0.229648629 | 0.31  | 0.345 | 0.1059851 | 1.3 |
| FARS2     | 4.42E-06 | 0.121577324  | 0.107 | 0.076 | 0.1065442 | 1.3 |
| AKT3      | 4.50E-06 | -0.337794123 | 0.466 | 0.48  | 0.1085803 | 1.3 |
| PRKRIP1   | 4.55E-06 | 0.110708838  | 0.17  | 0.13  | 0.1096871 | 1.3 |
| RPL41     | 4.58E-06 | -0.199856716 | 0.952 | 0.955 | 0.110386  | 1.3 |
| RNGTT     | 4.66E-06 | 0.104745461  | 0.082 | 0.055 | 0.1124384 | 1.3 |
| SCAF4     | 5.08E-06 | -0.137010208 | 0.061 | 0.09  | 0.1225176 | 1.3 |
| CHD8      | 5.20E-06 | 0.103210333  | 0.117 | 0.085 | 0.1254107 | 1.3 |

|           |          |              |       |       |           |     |
|-----------|----------|--------------|-------|-------|-----------|-----|
| NIPBL     | 5.25E-06 | -0.206536781 | 0.461 | 0.483 | 0.1266947 | 1.3 |
| ELMOD3    | 5.59E-06 | 0.115833471  | 0.112 | 0.081 | 0.1348912 | 1.3 |
| SMARCA2   | 5.70E-06 | 0.103474794  | 0.347 | 0.286 | 0.1374522 | 1.3 |
| RANBP2    | 5.76E-06 | -0.242183894 | 0.251 | 0.286 | 0.1389174 | 1.3 |
| RP11-84A1 | 6.09E-06 | -0.10994154  | 0.025 | 0.047 | 0.1467937 | 1.3 |
| PTN       | 6.17E-06 | -0.497518213 | 0.203 | 0.241 | 0.1487797 | 1.3 |
| METTL15   | 6.64E-06 | 0.109674579  | 0.16  | 0.122 | 0.160012  | 1.3 |
| TFDP2     | 6.72E-06 | 0.135153282  | 0.264 | 0.216 | 0.1620176 | 1.3 |
| MB21D2    | 6.76E-06 | -0.149816681 | 0.053 | 0.08  | 0.163052  | 1.3 |
| TIAM1     | 6.87E-06 | -0.370031037 | 0.29  | 0.318 | 0.1657068 | 1.3 |
| EHF       | 6.91E-06 | -0.265405392 | 0.607 | 0.595 | 0.1665475 | 1.3 |
| TAPBP     | 6.93E-06 | 0.147871861  | 0.151 | 0.116 | 0.1669987 | 1.3 |
| ZDHHC17   | 6.94E-06 | 0.106785087  | 0.118 | 0.086 | 0.1672883 | 1.3 |
| TMEM159   | 6.97E-06 | -0.21852813  | 0.415 | 0.433 | 0.1681093 | 1.3 |
| RPS19     | 7.03E-06 | 0.265124466  | 0.3   | 0.252 | 0.1694768 | 1.3 |
| GAREM1    | 7.31E-06 | 0.135899016  | 0.305 | 0.253 | 0.1761871 | 1.3 |
| DAPP1     | 7.74E-06 | -0.328438828 | 0.399 | 0.418 | 0.1865838 | 1.3 |
| RPL7A     | 7.91E-06 | -0.118714493 | 0.966 | 0.979 | 0.1907172 | 1.3 |
| PISD      | 8.03E-06 | -0.188435075 | 0.149 | 0.185 | 0.1936466 | 1.3 |
| GTF3C2    | 8.20E-06 | 0.100964716  | 0.091 | 0.063 | 0.1977687 | 1.3 |
| RPL22L1   | 8.22E-06 | 0.12179071   | 0.605 | 0.547 | 0.1982944 | 1.3 |
| MTF2      | 8.32E-06 | -0.180273333 | 0.186 | 0.224 | 0.2006604 | 1.3 |
| MGEA5     | 8.56E-06 | -0.209460917 | 0.379 | 0.408 | 0.2064906 | 1.3 |
| ARMC9     | 8.63E-06 | 0.15081822   | 0.127 | 0.094 | 0.2080124 | 1.3 |
| ZNF292    | 8.92E-06 | -0.213067829 | 0.633 | 0.636 | 0.2152024 | 1.3 |
| SERF2     | 9.02E-06 | 0.185779075  | 0.301 | 0.251 | 0.2175768 | 1.3 |
| SERINC2   | 9.08E-06 | 0.111030358  | 0.107 | 0.077 | 0.219039  | 1.3 |
| PFN1      | 9.12E-06 | 0.103077798  | 0.209 | 0.167 | 0.2199016 | 1.3 |
| PIP5K1A   | 9.22E-06 | -0.216359763 | 0.28  | 0.312 | 0.2224385 | 1.3 |
| BCL10     | 9.29E-06 | -0.178673977 | 0.104 | 0.137 | 0.224049  | 1.3 |
| PNPLA8    | 9.43E-06 | -0.283053565 | 0.267 | 0.297 | 0.2274216 | 1.3 |
| NDUFA1    | 9.54E-06 | 0.103505978  | 0.61  | 0.544 | 0.2300157 | 1.3 |
| RBM26     | 9.74E-06 | 0.120749749  | 0.242 | 0.195 | 0.2348623 | 1.3 |
| ZNF91     | 9.89E-06 | 0.105653019  | 0.176 | 0.136 | 0.2384304 | 1.3 |
| ABI2      | 9.93E-06 | 0.100188542  | 0.179 | 0.14  | 0.2393369 | 1.3 |
| DPH5      | 1.01E-05 | -0.108698852 | 0.062 | 0.092 | 0.2426044 | 1.3 |
| TMEM161F  | 1.03E-05 | 0.110568239  | 0.124 | 0.091 | 0.2480066 | 1.3 |
| DTX2      | 1.03E-05 | 0.112602179  | 0.127 | 0.095 | 0.2484014 | 1.3 |
| MAP2K4    | 1.04E-05 | 0.10809857   | 0.412 | 0.352 | 0.25073   | 1.3 |
| KLF5      | 1.13E-05 | -0.203158802 | 0.202 | 0.238 | 0.2728432 | 1.3 |
| RNPC3     | 1.14E-05 | 0.107201768  | 0.098 | 0.07  | 0.2757225 | 1.3 |
| SRPK2     | 1.17E-05 | -0.231592012 | 0.358 | 0.385 | 0.2814832 | 1.3 |
| C11orf49  | 1.17E-05 | 0.115722429  | 0.172 | 0.132 | 0.2827864 | 1.3 |
| KPNA6     | 1.17E-05 | -0.221657347 | 0.251 | 0.286 | 0.2830519 | 1.3 |
| NEDD9     | 1.20E-05 | -0.254063371 | 0.246 | 0.279 | 0.2899981 | 1.3 |
| TOP2B     | 1.25E-05 | -0.205406987 | 0.152 | 0.187 | 0.3019751 | 1.3 |
| DDIT4     | 1.27E-05 | 0.142024306  | 0.243 | 0.2   | 0.3069821 | 1.3 |

|           |          |              |       |       |           |     |
|-----------|----------|--------------|-------|-------|-----------|-----|
| STRBP     | 1.29E-05 | 0.113518689  | 0.223 | 0.18  | 0.3112557 | 1.3 |
| MARK3     | 1.30E-05 | -0.187047414 | 0.41  | 0.44  | 0.3136113 | 1.3 |
| UHRF1BP1  | 1.30E-05 | -0.218026874 | 0.168 | 0.203 | 0.3143587 | 1.3 |
| GNL2      | 1.31E-05 | -0.149355328 | 0.08  | 0.11  | 0.3160612 | 1.3 |
| AC016995. | 1.33E-05 | -0.235880106 | 0.171 | 0.207 | 0.3208763 | 1.3 |
| KMT5B     | 1.39E-05 | 0.102190824  | 0.192 | 0.151 | 0.3342762 | 1.3 |
| SLC25A6   | 1.42E-05 | 0.156542465  | 0.166 | 0.13  | 0.34127   | 1.3 |
| CAMSAP2   | 1.47E-05 | 0.102253617  | 0.155 | 0.119 | 0.3535104 | 1.3 |
| RPS15     | 1.52E-05 | 0.219518873  | 0.202 | 0.16  | 0.366633  | 1.3 |
| COX7A2    | 1.56E-05 | 0.132258529  | 0.809 | 0.795 | 0.3749979 | 1.3 |
| PHC2      | 1.56E-05 | 0.124351873  | 0.113 | 0.083 | 0.375758  | 1.3 |
| NFKBIA    | 1.57E-05 | -0.300129017 | 0.63  | 0.62  | 0.3787683 | 1.3 |
| ZFAND1    | 1.63E-05 | -0.21281422  | 0.255 | 0.286 | 0.3937844 | 1.3 |
| TAGLN     | 1.64E-05 | 0.166529877  | 0.037 | 0.021 | 0.3960258 | 1.3 |
| HNRNPM    | 1.71E-05 | -0.177884039 | 0.167 | 0.203 | 0.4128125 | 1.3 |
| ANXA11    | 1.81E-05 | -0.239220245 | 0.221 | 0.254 | 0.4366025 | 1.3 |
| ACTN4     | 1.81E-05 | -0.230499349 | 0.311 | 0.343 | 0.436703  | 1.3 |
| FRMD6     | 1.81E-05 | -0.201488011 | 0.169 | 0.205 | 0.4376388 | 1.3 |
| FAM60A    | 1.87E-05 | 0.13506465   | 0.441 | 0.379 | 0.4502609 | 1.3 |
| ELF3      | 2.14E-05 | -0.246474196 | 0.529 | 0.54  | 0.5159851 | 1.3 |
| PRDM2     | 2.23E-05 | -0.204880391 | 0.29  | 0.321 | 0.5369989 | 1.3 |
| TCEB3     | 2.31E-05 | -0.102586156 | 0.053 | 0.079 | 0.5567311 | 1.3 |
| EFR3A     | 2.33E-05 | -0.208999004 | 0.139 | 0.173 | 0.5618065 | 1.3 |
| DENND2C   | 2.37E-05 | -0.118781702 | 0.026 | 0.046 | 0.5724849 | 1.3 |
| FASTKD1   | 2.50E-05 | 0.105768448  | 0.07  | 0.047 | 0.6037989 | 1.3 |
| EIF1AX    | 2.53E-05 | -0.210229429 | 0.214 | 0.246 | 0.6093072 | 1.3 |
| LINGO1    | 2.55E-05 | -0.1622208   | 0.883 | 0.884 | 0.6137231 | 1.3 |
| OTUD3     | 2.56E-05 | -0.111732988 | 0.032 | 0.054 | 0.6183745 | 1.3 |
| CXADR     | 2.60E-05 | 0.121876312  | 0.264 | 0.219 | 0.6257827 | 1.3 |
| LINC01344 | 2.61E-05 | -0.13395728  | 0.027 | 0.047 | 0.6286519 | 1.3 |
| RP11-2900 | 2.68E-05 | 0.118774438  | 0.118 | 0.088 | 0.6459634 | 1.3 |
| EEF1B2    | 2.71E-05 | -0.170786648 | 0.876 | 0.886 | 0.6529694 | 1.3 |
| PVT1      | 2.72E-05 | -0.224167959 | 0.372 | 0.396 | 0.6564209 | 1.3 |
| MARCKS    | 2.86E-05 | -0.242421944 | 0.414 | 0.434 | 0.689218  | 1.3 |
| ITGB1     | 2.87E-05 | -0.293554816 | 0.339 | 0.363 | 0.6920236 | 1.3 |
| ARFGEF3   | 2.93E-05 | -0.230444399 | 0.203 | 0.237 | 0.7056734 | 1.3 |
| LAMC1     | 3.00E-05 | -0.209616044 | 0.242 | 0.274 | 0.7237356 | 1.3 |
| SSR3      | 3.24E-05 | -0.225079885 | 0.596 | 0.591 | 0.7813899 | 1.3 |
| KLHL24    | 3.27E-05 | -0.2133207   | 0.256 | 0.285 | 0.7874781 | 1.3 |
| IL32      | 3.34E-05 | 0.115121845  | 0.091 | 0.065 | 0.8053638 | 1.3 |
| USMG5     | 3.48E-05 | 0.143366939  | 0.624 | 0.575 | 0.8397929 | 1.3 |
| KDM3A     | 3.63E-05 | -0.137832511 | 0.087 | 0.117 | 0.8764078 | 1.3 |
| SERPINB9  | 3.64E-05 | -0.475281252 | 0.134 | 0.167 | 0.8782796 | 1.3 |
| RAB5A     | 3.66E-05 | -0.171828868 | 0.195 | 0.23  | 0.8833827 | 1.3 |
| KIDINS220 | 3.95E-05 | -0.132410525 | 0.152 | 0.187 | 0.9520392 | 1.3 |
| EEF1D     | 3.98E-05 | 0.107667891  | 0.148 | 0.114 | 0.9604206 | 1.3 |
| F11R      | 4.01E-05 | -0.182091783 | 0.152 | 0.184 | 0.9673449 | 1.3 |

|           |          |              |       |       |           |     |
|-----------|----------|--------------|-------|-------|-----------|-----|
| TUFT1     | 4.03E-05 | -0.130348318 | 0.125 | 0.159 | 0.9719897 | 1.3 |
| VGLL4     | 4.07E-05 | 0.105891177  | 0.304 | 0.255 | 0.9815294 | 1.3 |
| HBS1L     | 4.18E-05 | -0.19544919  | 0.171 | 0.204 | 1         | 1.3 |
| PPP2R2D   | 4.29E-05 | -0.178425885 | 0.104 | 0.134 | 1         | 1.3 |
| ESD       | 4.44E-05 | -0.208977305 | 0.448 | 0.459 | 1         | 1.3 |
| TMEM258   | 4.58E-05 | -0.163315514 | 0.628 | 0.631 | 1         | 1.3 |
| ACTB      | 4.66E-05 | -0.282595937 | 0.612 | 0.617 | 1         | 1.3 |
| KLK5      | 4.67E-05 | -0.194280527 | 0.052 | 0.075 | 1         | 1.3 |
| IPO7      | 4.68E-05 | -0.242966637 | 0.272 | 0.297 | 1         | 1.3 |
| RASGEF1B  | 4.89E-05 | -0.154293438 | 0.894 | 0.894 | 1         | 1.3 |
| RPLP2     | 4.93E-05 | 0.180541698  | 0.265 | 0.223 | 1         | 1.3 |
| CHSY1     | 5.16E-05 | -0.14538849  | 0.077 | 0.104 | 1         | 1.3 |
| MAMDC2    | 5.18E-05 | -0.136647634 | 0.941 | 0.939 | 1         | 1.3 |
| EML4      | 5.27E-05 | -0.182947641 | 0.24  | 0.273 | 1         | 1.3 |
| SMIM14    | 5.40E-05 | 0.100809277  | 0.183 | 0.147 | 1         | 1.3 |
| RPS25     | 5.46E-05 | -0.183522288 | 0.876 | 0.862 | 1         | 1.3 |
| EDF1      | 5.46E-05 | 0.132306587  | 0.097 | 0.071 | 1         | 1.3 |
| USP47     | 5.48E-05 | -0.201087514 | 0.29  | 0.321 | 1         | 1.3 |
| ASCC3     | 5.61E-05 | 0.106360631  | 0.241 | 0.198 | 1         | 1.3 |
| NOD2      | 5.73E-05 | -0.109366455 | 0.06  | 0.086 | 1         | 1.3 |
| KYNU      | 5.76E-05 | -0.210831029 | 0.444 | 0.358 | 1         | 1.3 |
| PJA2      | 6.13E-05 | -0.196538431 | 0.205 | 0.237 | 1         | 1.3 |
| CDK6      | 6.14E-05 | 0.120686694  | 0.263 | 0.218 | 1         | 1.3 |
| SYMPK     | 6.74E-05 | 0.101688063  | 0.086 | 0.062 | 1         | 1.3 |
| YY1AP1    | 6.86E-05 | -0.149496106 | 0.145 | 0.176 | 1         | 1.3 |
| IL6R      | 6.91E-05 | 0.105292875  | 0.094 | 0.069 | 1         | 1.3 |
| CSRP1     | 6.94E-05 | -0.152297047 | 0.115 | 0.145 | 1         | 1.3 |
| TNFRSF10E | 6.97E-05 | -0.185002542 | 0.173 | 0.205 | 1         | 1.3 |
| LATS2     | 7.17E-05 | -0.153094502 | 0.098 | 0.128 | 1         | 1.3 |
| RREB1     | 7.74E-05 | 0.101583976  | 0.3   | 0.253 | 1         | 1.3 |
| MAMLD1    | 7.76E-05 | -0.134176694 | 0.042 | 0.063 | 1         | 1.3 |
| DDX46     | 7.78E-05 | 0.109354459  | 0.125 | 0.096 | 1         | 1.3 |
| PITPNB    | 7.90E-05 | -0.22072882  | 0.295 | 0.322 | 1         | 1.3 |
| GPM6B     | 7.94E-05 | -0.196099115 | 0.182 | 0.214 | 1         | 1.3 |
| HLA-E     | 8.17E-05 | 0.106829567  | 0.142 | 0.111 | 1         | 1.3 |
| SESN2     | 8.21E-05 | -0.174292246 | 0.085 | 0.112 | 1         | 1.3 |
| ERO1A     | 8.30E-05 | -0.31585306  | 0.336 | 0.357 | 1         | 1.3 |
| EIF2A     | 8.34E-05 | -0.197042237 | 0.423 | 0.437 | 1         | 1.3 |
| CAMSAP1   | 8.38E-05 | -0.155650806 | 0.059 | 0.083 | 1         | 1.3 |
| RTCB      | 8.66E-05 | -0.213573126 | 0.44  | 0.456 | 1         | 1.3 |
| INSIG2    | 8.88E-05 | -0.24493601  | 0.215 | 0.243 | 1         | 1.3 |
| FAM19A2   | 9.03E-05 | -0.201908572 | 0.625 | 0.638 | 1         | 1.3 |
| CYFIP1    | 9.10E-05 | 0.113430762  | 0.148 | 0.115 | 1         | 1.3 |
| BCAS3     | 9.12E-05 | -0.101138619 | 0.849 | 0.838 | 1         | 1.3 |
| APOLD1    | 9.49E-05 | -0.109406267 | 0.046 | 0.068 | 1         | 1.3 |
| HNRNPD    | 9.66E-05 | -0.193824305 | 0.267 | 0.297 | 1         | 1.3 |
| DTNBP1    | 9.81E-05 | 0.106766307  | 0.074 | 0.052 | 1         | 1.3 |

|           |          |              |       |       |   |     |
|-----------|----------|--------------|-------|-------|---|-----|
| EPN2      | 9.91E-05 | 0.101938796  | 0.158 | 0.125 | 1 | 1.3 |
| CD47      | 0.0001   | -0.175065092 | 0.418 | 0.443 | 1 | 1.3 |
| MORN2     | 0.000107 | -0.107407546 | 0.038 | 0.058 | 1 | 1.3 |
| NUBPL     | 0.000108 | 0.100321047  | 0.079 | 0.057 | 1 | 1.3 |
| TBC1D3P1- | 0.000108 | -0.186632137 | 0.745 | 0.753 | 1 | 1.3 |
| RP11-66B2 | 0.000111 | 0.124572699  | 0.102 | 0.076 | 1 | 1.3 |
| ZC3H15    | 0.000111 | -0.166509391 | 0.246 | 0.276 | 1 | 1.3 |
| TM9SF3    | 0.000115 | -0.185743947 | 0.258 | 0.288 | 1 | 1.3 |
| CEBPD     | 0.000117 | 0.121238792  | 0.252 | 0.211 | 1 | 1.3 |
| MACF1     | 0.000122 | -0.23113628  | 0.642 | 0.631 | 1 | 1.3 |
| DSG2      | 0.000126 | -0.169335455 | 0.338 | 0.366 | 1 | 1.3 |
| RP11-68E1 | 0.000127 | -0.112122451 | 0.039 | 0.059 | 1 | 1.3 |
| GTF2IRD1  | 0.000127 | -0.16690757  | 0.125 | 0.154 | 1 | 1.3 |
| UBA6      | 0.000128 | -0.165299855 | 0.314 | 0.343 | 1 | 1.3 |
| IQGAP1    | 0.00013  | -0.181056908 | 0.42  | 0.439 | 1 | 1.3 |
| SH3BP5    | 0.000135 | -0.104637315 | 0.078 | 0.105 | 1 | 1.3 |
| OLFM4     | 0.000138 | 0.160950125  | 0.053 | 0.035 | 1 | 1.3 |
| ZBTB43    | 0.00014  | -0.15635165  | 0.137 | 0.167 | 1 | 1.3 |
| ABL1      | 0.000141 | 0.113790915  | 0.156 | 0.125 | 1 | 1.3 |
| PALLD     | 0.000142 | -0.212148377 | 0.51  | 0.517 | 1 | 1.3 |
| RABGGTB   | 0.000142 | -0.139198836 | 0.075 | 0.1   | 1 | 1.3 |
| SEC63     | 0.000142 | -0.165716508 | 0.229 | 0.259 | 1 | 1.3 |
| ASXL1     | 0.000147 | -0.13246999  | 0.241 | 0.273 | 1 | 1.3 |
| SESTD1    | 0.000148 | -0.153864498 | 0.619 | 0.626 | 1 | 1.3 |
| PIWIL1    | 0.000149 | -0.126564873 | 0.042 | 0.063 | 1 | 1.3 |
| MAX       | 0.00015  | -0.100456681 | 0.156 | 0.189 | 1 | 1.3 |
| MBD2      | 0.000157 | -0.227287381 | 0.265 | 0.29  | 1 | 1.3 |
| TAB2      | 0.000158 | -0.223457729 | 0.252 | 0.277 | 1 | 1.3 |
| HNRNPU    | 0.000159 | -0.125206421 | 0.084 | 0.109 | 1 | 1.3 |
| SSBP2     | 0.000177 | -0.361941551 | 0.332 | 0.35  | 1 | 1.3 |
| VCL       | 0.000184 | -0.166731215 | 0.302 | 0.331 | 1 | 1.3 |
| CRABP2    | 0.000184 | -0.123852767 | 0.065 | 0.089 | 1 | 1.3 |
| DAPK2     | 0.000189 | -0.289322611 | 0.443 | 0.447 | 1 | 1.3 |
| RNF115    | 0.000208 | -0.230111587 | 0.219 | 0.246 | 1 | 1.3 |
| SLC26A3   | 0.000209 | -0.141290546 | 0.747 | 0.766 | 1 | 1.3 |
| KRT80     | 0.000218 | -0.110289859 | 0.029 | 0.046 | 1 | 1.3 |
| ACTG1     | 0.00022  | 0.118637796  | 0.723 | 0.688 | 1 | 1.3 |
| FOXK1     | 0.000222 | -0.140382265 | 0.125 | 0.154 | 1 | 1.3 |
| RHEB      | 0.00023  | -0.197365952 | 0.23  | 0.258 | 1 | 1.3 |
| TRAK2     | 0.000233 | 0.103290357  | 0.052 | 0.034 | 1 | 1.3 |
| ARHGAP26  | 0.000236 | -0.215745064 | 0.21  | 0.24  | 1 | 1.3 |
| RIF1      | 0.000243 | -0.150639953 | 0.306 | 0.334 | 1 | 1.3 |
| RP11-356C | 0.000245 | -0.243978131 | 0.231 | 0.26  | 1 | 1.3 |
| PHF3      | 0.000258 | -0.172319986 | 0.322 | 0.351 | 1 | 1.3 |
| SCGB1D2   | 0.000287 | -0.589157909 | 0.076 | 0.101 | 1 | 1.3 |
| NDUFV2    | 0.000311 | -0.172782215 | 0.134 | 0.161 | 1 | 1.3 |
| KIAA1324  | 0.000311 | -0.138145578 | 0.089 | 0.114 | 1 | 1.3 |

|           |          |              |       |       |   |     |
|-----------|----------|--------------|-------|-------|---|-----|
| RTKN2     | 0.000317 | -0.104631428 | 0.024 | 0.04  | 1 | 1.3 |
| MAP3K8    | 0.000329 | -0.20142065  | 0.261 | 0.287 | 1 | 1.3 |
| CHCHD3    | 0.00033  | -0.136953749 | 0.89  | 0.881 | 1 | 1.3 |
| ARL5B     | 0.000333 | -0.122032973 | 0.056 | 0.078 | 1 | 1.3 |
| ACTR3     | 0.000339 | -0.170861264 | 0.284 | 0.309 | 1 | 1.3 |
| MCTP1     | 0.000342 | 0.148654581  | 0.125 | 0.099 | 1 | 1.3 |
| INTS12    | 0.000343 | -0.192828479 | 0.173 | 0.2   | 1 | 1.3 |
| TCF7L2    | 0.000347 | -0.229326032 | 0.436 | 0.45  | 1 | 1.3 |
| CCDC85C   | 0.000349 | -0.103018895 | 0.041 | 0.06  | 1 | 1.3 |
| LYST      | 0.000349 | -0.181729228 | 0.147 | 0.174 | 1 | 1.3 |
| ZFP36L2   | 0.000351 | -0.322176723 | 0.35  | 0.367 | 1 | 1.3 |
| ATP13A5   | 0.000352 | -0.104457814 | 0.033 | 0.051 | 1 | 1.3 |
| PTBP2     | 0.000361 | -0.185889986 | 0.446 | 0.459 | 1 | 1.3 |
| RP11-496N | 0.000374 | -0.153066024 | 0.009 | 0.02  | 1 | 1.3 |
| IFT57     | 0.00038  | -0.158397753 | 0.107 | 0.133 | 1 | 1.3 |
| MRPS33    | 0.000381 | -0.179353773 | 0.29  | 0.315 | 1 | 1.3 |
| OLA1      | 0.000383 | 0.100861874  | 0.276 | 0.235 | 1 | 1.3 |
| NBAT1     | 0.000391 | -0.126436857 | 0.065 | 0.087 | 1 | 1.3 |
| SCARA3    | 0.0004   | -0.108549217 | 0.05  | 0.071 | 1 | 1.3 |
| LINC00866 | 0.00041  | -0.110907327 | 0.01  | 0.022 | 1 | 1.3 |
| ATP13A3   | 0.000419 | -0.262638333 | 0.33  | 0.348 | 1 | 1.3 |
| HPCAL1    | 0.000423 | -0.138609936 | 0.09  | 0.115 | 1 | 1.3 |
| CCDC170   | 0.000426 | -0.109057879 | 0.032 | 0.049 | 1 | 1.3 |
| PAFAH1B1  | 0.000432 | -0.189048712 | 0.355 | 0.374 | 1 | 1.3 |
| LRP2      | 0.00044  | -0.201826101 | 0.212 | 0.239 | 1 | 1.3 |
| CSNK1A1   | 0.000442 | -0.138288505 | 0.596 | 0.597 | 1 | 1.3 |
| RPL8      | 0.000442 | 0.202792817  | 0.213 | 0.179 | 1 | 1.3 |
| PAFAH1B2  | 0.000451 | -0.188090707 | 0.215 | 0.24  | 1 | 1.3 |
| STAT3     | 0.000452 | -0.194670903 | 0.517 | 0.518 | 1 | 1.3 |
| LRRC23    | 0.000453 | -0.100630743 | 0.121 | 0.094 | 1 | 1.3 |
| TNFRSF11A | 0.000469 | -0.15965486  | 0.113 | 0.139 | 1 | 1.3 |
| IRF1      | 0.000469 | -0.125461963 | 0.127 | 0.156 | 1 | 1.3 |
| CHIC2     | 0.00047  | -0.201186686 | 0.21  | 0.238 | 1 | 1.3 |
| TMEM263   | 0.00048  | -0.123773074 | 0.088 | 0.113 | 1 | 1.3 |
| PLIN2     | 0.000481 | -0.276981348 | 0.135 | 0.159 | 1 | 1.3 |
| RP11-779O | 0.000487 | -0.186322951 | 0.193 | 0.222 | 1 | 1.3 |
| TMEM41A   | 0.000487 | -0.155632851 | 0.191 | 0.218 | 1 | 1.3 |
| BBC3      | 0.000488 | -0.124669217 | 0.053 | 0.073 | 1 | 1.3 |
| FAM78B    | 0.000501 | -0.108044901 | 0.058 | 0.079 | 1 | 1.3 |
| TJP1      | 0.000506 | -0.210802692 | 0.378 | 0.394 | 1 | 1.3 |
| ARID4A    | 0.000511 | -0.125659909 | 0.152 | 0.181 | 1 | 1.3 |
| POLG2     | 0.000513 | -0.173236686 | 0.061 | 0.082 | 1 | 1.3 |
| GRIN2A    | 0.000519 | -0.157787815 | 0.043 | 0.062 | 1 | 1.3 |
| RPS5      | 0.00052  | 0.227366439  | 0.319 | 0.28  | 1 | 1.3 |
| MYC       | 0.000532 | -0.20208448  | 0.13  | 0.155 | 1 | 1.3 |
| NDRG1     | 0.000541 | -0.344740413 | 0.452 | 0.455 | 1 | 1.3 |
| TOR1AIP2  | 0.000542 | -0.226020533 | 0.223 | 0.245 | 1 | 1.3 |



|           |          |              |       |       |   |     |
|-----------|----------|--------------|-------|-------|---|-----|
| LMAN1     | 0.000545 | -0.146793089 | 0.182 | 0.21  | 1 | 1.3 |
| COX7B     | 0.00056  | -0.14460301  | 0.661 | 0.656 | 1 | 1.3 |
| DSG3      | 0.000562 | -0.487850247 | 0.055 | 0.075 | 1 | 1.3 |
| RPL29     | 0.00058  | 0.223880885  | 0.329 | 0.289 | 1 | 1.3 |
| S100A2    | 0.00058  | -0.119793156 | 0.121 | 0.094 | 1 | 1.3 |
| PTGS2     | 0.000586 | -0.132835105 | 0.016 | 0.029 | 1 | 1.3 |
| RAB21     | 0.000589 | -0.1493345   | 0.176 | 0.204 | 1 | 1.3 |
| FABP6     | 0.000612 | -0.162802867 | 0.033 | 0.05  | 1 | 1.3 |
| LAMB3     | 0.000625 | -0.17951865  | 0.332 | 0.274 | 1 | 1.3 |
| DECR1     | 0.000625 | -0.121968778 | 0.125 | 0.152 | 1 | 1.3 |
| KRAS      | 0.000633 | -0.124581598 | 0.123 | 0.15  | 1 | 1.3 |
| LINC00887 | 0.000693 | -0.138281991 | 0.052 | 0.072 | 1 | 1.3 |
| RP11-795H | 0.000696 | -0.205090059 | 0.425 | 0.446 | 1 | 1.3 |
| GTF2I     | 0.000719 | -0.22137809  | 0.427 | 0.437 | 1 | 1.3 |
| SH3BGRL   | 0.000747 | -0.17984933  | 0.222 | 0.248 | 1 | 1.3 |
| KRT7      | 0.00075  | -0.194490292 | 0.259 | 0.284 | 1 | 1.3 |
| CA5B      | 0.000758 | -0.174811178 | 0.116 | 0.14  | 1 | 1.3 |
| CCDC59    | 0.000798 | -0.185502008 | 0.163 | 0.187 | 1 | 1.3 |
| TP53BP2   | 0.000803 | -0.133845646 | 0.139 | 0.165 | 1 | 1.3 |
| PCBP1     | 0.000836 | -0.232910236 | 0.484 | 0.477 | 1 | 1.3 |
| GSTA1     | 0.000853 | -0.225704612 | 0.072 | 0.095 | 1 | 1.3 |
| C12orf60  | 0.00086  | -0.119371004 | 0.079 | 0.101 | 1 | 1.3 |
| RAB9A     | 0.000883 | -0.206953991 | 0.188 | 0.213 | 1 | 1.3 |
| PEAK1     | 0.000886 | -0.225214211 | 0.161 | 0.187 | 1 | 1.3 |
| NOP58     | 0.000906 | -0.157637896 | 0.196 | 0.224 | 1 | 1.3 |
| PDK1      | 0.000911 | -0.179748971 | 0.101 | 0.124 | 1 | 1.3 |
| RPL28     | 0.000925 | 0.294961481  | 0.148 | 0.123 | 1 | 1.3 |
| TPT1      | 0.000926 | 0.143402872  | 0.857 | 0.825 | 1 | 1.3 |
| ETS2      | 0.000974 | -0.108897646 | 0.107 | 0.132 | 1 | 1.3 |
| SGCZ      | 0.000976 | -0.176949014 | 0.069 | 0.091 | 1 | 1.3 |
| LPP       | 0.000999 | 0.101671244  | 0.918 | 0.879 | 1 | 1.3 |
| MREG      | 0.001007 | -0.130480475 | 0.078 | 0.101 | 1 | 1.3 |
| LAPTM4A   | 0.001032 | -0.148566996 | 0.217 | 0.245 | 1 | 1.3 |
| FEZ2      | 0.001047 | -0.242945306 | 0.375 | 0.389 | 1 | 1.3 |
| RAB14     | 0.001051 | -0.13562987  | 0.104 | 0.128 | 1 | 1.3 |
| FDCSP     | 0.00108  | -0.138723052 | 0.231 | 0.196 | 1 | 1.3 |
| ANXA1     | 0.001197 | -0.203048369 | 0.932 | 0.897 | 1 | 1.3 |
| UBD       | 0.001235 | -0.353074176 | 0.148 | 0.176 | 1 | 1.3 |
| ARHGEF2   | 0.001241 | -0.101905968 | 0.067 | 0.087 | 1 | 1.3 |
| OTUD4     | 0.001258 | -0.11176478  | 0.113 | 0.137 | 1 | 1.3 |
| RASGEF1C  | 0.001259 | -0.143443911 | 0.06  | 0.079 | 1 | 1.3 |
| HNRNPDL   | 0.001335 | -0.155444634 | 0.287 | 0.307 | 1 | 1.3 |
| CEP95     | 0.001394 | -0.132886842 | 0.133 | 0.157 | 1 | 1.3 |
| GSTO2     | 0.001394 | -0.105245826 | 0.1   | 0.123 | 1 | 1.3 |
| FAM49A    | 0.001413 | -0.118744281 | 0.047 | 0.064 | 1 | 1.3 |
| FOXJ3     | 0.001454 | -0.164143174 | 0.276 | 0.3   | 1 | 1.3 |
| RPL18     | 0.00149  | 0.145005917  | 0.139 | 0.114 | 1 | 1.3 |

|            |          |              |       |       |   |     |
|------------|----------|--------------|-------|-------|---|-----|
| MAP2       | 0.001499 | -0.206920457 | 0.15  | 0.173 | 1 | 1.3 |
| CUL3       | 0.001513 | -0.187097097 | 0.333 | 0.351 | 1 | 1.3 |
| PCGF5      | 0.001569 | -0.161145954 | 0.163 | 0.187 | 1 | 1.3 |
| RPS16      | 0.001594 | 0.159280385  | 0.388 | 0.347 | 1 | 1.3 |
| BCOR       | 0.001597 | -0.170876258 | 0.407 | 0.433 | 1 | 1.3 |
| FBXO42     | 0.001653 | -0.1646817   | 0.156 | 0.179 | 1 | 1.3 |
| YWHAH      | 0.001712 | -0.193695544 | 0.205 | 0.224 | 1 | 1.3 |
| EIF4B      | 0.001726 | -0.138506394 | 0.477 | 0.489 | 1 | 1.3 |
| RPL36      | 0.001756 | 0.123238448  | 0.268 | 0.234 | 1 | 1.3 |
| SNRPD2     | 0.00176  | -0.145579059 | 0.758 | 0.741 | 1 | 1.3 |
| CXCL3      | 0.001798 | -0.216602806 | 0.077 | 0.097 | 1 | 1.3 |
| MYSM1      | 0.001812 | -0.123479418 | 0.112 | 0.135 | 1 | 1.3 |
| RPS27      | 0.001824 | -0.202541846 | 0.801 | 0.789 | 1 | 1.3 |
| MAP4K5     | 0.001834 | -0.213669072 | 0.355 | 0.368 | 1 | 1.3 |
| RP11-840I1 | 0.001856 | -0.118623071 | 0.077 | 0.098 | 1 | 1.3 |
| ZNF706     | 0.001857 | -0.118675391 | 0.105 | 0.128 | 1 | 1.3 |
| GHR        | 0.001945 | -0.212465196 | 0.121 | 0.144 | 1 | 1.3 |
| CLINT1     | 0.001959 | -0.195280473 | 0.361 | 0.371 | 1 | 1.3 |
| LAMP2      | 0.001994 | -0.191193547 | 0.238 | 0.258 | 1 | 1.3 |
| PRKAG2     | 0.002031 | -0.107738576 | 0.149 | 0.172 | 1 | 1.3 |
| IFIH1      | 0.002043 | -0.135538256 | 0.085 | 0.105 | 1 | 1.3 |
| C6orf132   | 0.002195 | -0.13561374  | 0.148 | 0.171 | 1 | 1.3 |
| RAB11A     | 0.002197 | -0.258601821 | 0.615 | 0.595 | 1 | 1.3 |
| EIF3M      | 0.002314 | -0.162798513 | 0.489 | 0.487 | 1 | 1.3 |
| RAB3IP     | 0.002334 | -0.127774736 | 0.104 | 0.124 | 1 | 1.3 |
| GGA2       | 0.002347 | -0.139308746 | 0.134 | 0.156 | 1 | 1.3 |
| ATP2B4     | 0.002429 | -0.270516895 | 0.259 | 0.278 | 1 | 1.3 |
| UBQLN1     | 0.002441 | -0.141544265 | 0.233 | 0.255 | 1 | 1.3 |
| RPS13      | 0.002478 | -0.136820229 | 0.854 | 0.847 | 1 | 1.3 |
| RPLP1      | 0.002525 | 0.222051457  | 0.292 | 0.26  | 1 | 1.3 |
| UBE2G1     | 0.00257  | -0.160084958 | 0.17  | 0.193 | 1 | 1.3 |
| PTRF       | 0.002752 | -0.191123498 | 0.161 | 0.182 | 1 | 1.3 |
| STX5       | 0.002791 | -0.121185704 | 0.17  | 0.195 | 1 | 1.3 |
| ROR1       | 0.002901 | 0.107307306  | 0.048 | 0.034 | 1 | 1.3 |
| DCP1A      | 0.002918 | -0.168691642 | 0.244 | 0.264 | 1 | 1.3 |
| MPP5       | 0.002925 | -0.170870397 | 0.227 | 0.248 | 1 | 1.3 |
| CREBRF     | 0.002943 | -0.130840922 | 0.201 | 0.225 | 1 | 1.3 |
| SEC31A     | 0.002985 | -0.159239926 | 0.448 | 0.454 | 1 | 1.3 |
| MGAT5      | 0.003097 | -0.177448446 | 0.296 | 0.315 | 1 | 1.3 |
| GPR107     | 0.003107 | -0.125344118 | 0.137 | 0.158 | 1 | 1.3 |
| DAPK1      | 0.003179 | -0.162532995 | 0.673 | 0.663 | 1 | 1.3 |
| BFAR       | 0.003258 | -0.133110635 | 0.179 | 0.202 | 1 | 1.3 |
| ABTB2      | 0.003261 | -0.232096574 | 0.225 | 0.246 | 1 | 1.3 |
| ANKRD12    | 0.003339 | -0.206672351 | 0.567 | 0.562 | 1 | 1.3 |
| CALR       | 0.003387 | -0.144482968 | 0.17  | 0.194 | 1 | 1.3 |
| EIF3H      | 0.003734 | -0.123997491 | 0.704 | 0.697 | 1 | 1.3 |
| MPZL1      | 0.003735 | -0.154698679 | 0.476 | 0.48  | 1 | 1.3 |

|          |          |              |       |       |   |     |
|----------|----------|--------------|-------|-------|---|-----|
| CA8      | 0.003818 | -0.246795547 | 0.44  | 0.439 | 1 | 1.3 |
| NACA2    | 0.003841 | -0.153868211 | 0.644 | 0.634 | 1 | 1.3 |
| SRSF3    | 0.003888 | -0.183002367 | 0.605 | 0.598 | 1 | 1.3 |
| OGT      | 0.003911 | -0.18386641  | 0.362 | 0.371 | 1 | 1.3 |
| CCDC50   | 0.004068 | -0.148799551 | 0.141 | 0.161 | 1 | 1.3 |
| ZNFX1    | 0.004138 | -0.118367429 | 0.117 | 0.139 | 1 | 1.3 |
| TNF      | 0.004222 | -0.172387353 | 0.088 | 0.108 | 1 | 1.3 |
| TBC1D22B | 0.004331 | -0.162247926 | 0.17  | 0.19  | 1 | 1.3 |
| OAZ2     | 0.004398 | -0.105537686 | 0.071 | 0.089 | 1 | 1.3 |
| YWHAE    | 0.004401 | -0.125080333 | 0.62  | 0.618 | 1 | 1.3 |
| IRS2     | 0.004464 | -0.112926122 | 0.347 | 0.366 | 1 | 1.3 |
| RDX      | 0.004622 | -0.156767378 | 0.2   | 0.221 | 1 | 1.3 |
| NDUFS4   | 0.004767 | -0.129257039 | 0.458 | 0.464 | 1 | 1.3 |
| RPL9     | 0.004882 | -0.103162553 | 0.67  | 0.672 | 1 | 1.3 |
| PRKCA    | 0.004956 | -0.154218609 | 0.077 | 0.095 | 1 | 1.3 |
| NAA50    | 0.005102 | -0.146578284 | 0.2   | 0.221 | 1 | 1.3 |
| SERP1    | 0.005106 | -0.122922515 | 0.259 | 0.279 | 1 | 1.3 |
| ZFC3H1   | 0.005235 | -0.135919929 | 0.183 | 0.207 | 1 | 1.3 |
| NCOA2    | 0.005543 | -0.188373599 | 0.504 | 0.496 | 1 | 1.3 |
| SNRPF    | 0.005762 | -0.153349738 | 0.235 | 0.254 | 1 | 1.3 |
| GALNT3   | 0.006008 | -0.210530832 | 0.2   | 0.217 | 1 | 1.3 |
| TRA2B    | 0.006045 | -0.1775377   | 0.185 | 0.203 | 1 | 1.3 |
| HSPA9    | 0.006202 | -0.163412925 | 0.197 | 0.216 | 1 | 1.3 |
| KLF6     | 0.006332 | -0.145940383 | 0.52  | 0.528 | 1 | 1.3 |
| RPS28    | 0.00637  | 0.100756643  | 0.129 | 0.108 | 1 | 1.3 |
| NT5C3A   | 0.006581 | -0.163731468 | 0.176 | 0.197 | 1 | 1.3 |
| ISG20    | 0.006672 | -0.101878276 | 0.038 | 0.052 | 1 | 1.3 |
| VAPA     | 0.006731 | -0.13075311  | 0.486 | 0.479 | 1 | 1.3 |
| WTAP     | 0.006745 | -0.29553274  | 0.676 | 0.659 | 1 | 1.3 |
| TNFAIP8  | 0.006828 | -0.107147215 | 0.447 | 0.387 | 1 | 1.3 |
| IDO1     | 0.006957 | -0.146093343 | 0.029 | 0.042 | 1 | 1.3 |
| PIGP     | 0.006978 | -0.115604797 | 0.146 | 0.166 | 1 | 1.3 |
| SERINC1  | 0.007154 | -0.175890097 | 0.299 | 0.31  | 1 | 1.3 |
| CD74     | 0.007607 | -0.12779599  | 0.141 | 0.162 | 1 | 1.3 |
| LDHB     | 0.00774  | -0.125607864 | 0.762 | 0.745 | 1 | 1.3 |
| FBL      | 0.007864 | -0.102653288 | 0.2   | 0.222 | 1 | 1.3 |
| CDK17    | 0.007936 | -0.109762617 | 0.123 | 0.143 | 1 | 1.3 |
| PRPSAP1  | 0.007957 | -0.126020822 | 0.104 | 0.122 | 1 | 1.3 |
| ZNF195   | 0.008057 | -0.107008367 | 0.1   | 0.119 | 1 | 1.3 |
| NUDT2    | 0.008353 | -0.112072608 | 0.13  | 0.148 | 1 | 1.3 |
| LMBRD1   | 0.008362 | -0.148491376 | 0.225 | 0.243 | 1 | 1.3 |
| CPAMD8   | 0.008393 | -0.105587209 | 0.104 | 0.122 | 1 | 1.3 |
| RAB7A    | 0.008706 | -0.158225951 | 0.386 | 0.391 | 1 | 1.3 |
| RNF10    | 0.008714 | -0.122735747 | 0.156 | 0.174 | 1 | 1.3 |
| TNIP1    | 0.008759 | -0.125419063 | 0.163 | 0.183 | 1 | 1.3 |
| WAPL     | 0.008841 | -0.154082887 | 0.16  | 0.177 | 1 | 1.3 |
| ATG14    | 0.008894 | -0.105072363 | 0.087 | 0.104 | 1 | 1.3 |

|           |          |              |       |       |   |     |
|-----------|----------|--------------|-------|-------|---|-----|
| SCYL2     | 0.009239 | -0.166461269 | 0.244 | 0.26  | 1 | 1.3 |
| GNA12     | 0.009482 | -0.13712384  | 0.345 | 0.362 | 1 | 1.3 |
| CTNNA1    | 0.009563 | -0.150336738 | 0.094 | 0.111 | 1 | 1.3 |
| PPP1R14C  | 0.010813 | -0.15218319  | 0.182 | 0.199 | 1 | 1.3 |
| BRX1      | 0.011089 | -0.151870588 | 0.111 | 0.127 | 1 | 1.3 |
| MBIP      | 0.011175 | -0.129386489 | 0.15  | 0.167 | 1 | 1.3 |
| MED13L    | 0.01214  | -0.144043083 | 0.7   | 0.669 | 1 | 1.3 |
| SORBS2    | 0.012148 | -0.150348598 | 0.635 | 0.559 | 1 | 1.3 |
| NBPF19    | 0.012421 | -0.145489211 | 0.172 | 0.19  | 1 | 1.3 |
| ATP11B    | 0.01274  | -0.145661555 | 0.183 | 0.201 | 1 | 1.3 |
| CLIP1     | 0.012978 | -0.12378909  | 0.375 | 0.387 | 1 | 1.3 |
| FGD4      | 0.013108 | -0.144908928 | 0.255 | 0.27  | 1 | 1.3 |
| RP11-574F | 0.013191 | -0.103310635 | 0.084 | 0.1   | 1 | 1.3 |
| WDR26     | 0.013211 | -0.131286206 | 0.196 | 0.214 | 1 | 1.3 |
| NR3C1     | 0.013294 | -0.153471832 | 0.237 | 0.253 | 1 | 1.3 |
| CCNY      | 0.013396 | -0.357454439 | 0.254 | 0.263 | 1 | 1.3 |
| RP1-78O14 | 0.013408 | -0.173610186 | 0.058 | 0.071 | 1 | 1.3 |
| CALCOCO2  | 0.013581 | -0.138147841 | 0.319 | 0.333 | 1 | 1.3 |
| CELF1     | 0.013893 | -0.117010771 | 0.333 | 0.344 | 1 | 1.3 |
| PELI1     | 0.013974 | -0.193112652 | 0.459 | 0.453 | 1 | 1.3 |
| UQCRC2    | 0.014582 | -0.141927336 | 0.45  | 0.448 | 1 | 1.3 |
| ADAM32    | 0.014628 | -0.195232026 | 0.113 | 0.128 | 1 | 1.3 |
| CSDE1     | 0.014685 | -0.126352075 | 0.596 | 0.58  | 1 | 1.3 |
| ELK3      | 0.014773 | -0.147341843 | 0.171 | 0.187 | 1 | 1.3 |
| KRT17     | 0.014898 | -0.125505096 | 0.022 | 0.032 | 1 | 1.3 |
| H3F3B     | 0.01491  | 0.122486778  | 0.426 | 0.388 | 1 | 1.3 |
| LHFPL3    | 0.015272 | -0.138087019 | 0.303 | 0.313 | 1 | 1.3 |
| NUP88     | 0.015549 | -0.141130247 | 0.181 | 0.198 | 1 | 1.3 |
| CTC-425F1 | 0.015588 | -0.106285712 | 0.071 | 0.086 | 1 | 1.3 |
| TSLP      | 0.015855 | -0.105364309 | 0.065 | 0.079 | 1 | 1.3 |
| SNX1      | 0.015923 | -0.140881558 | 0.128 | 0.144 | 1 | 1.3 |
| ZNF165    | 0.016409 | -0.134473136 | 0.053 | 0.066 | 1 | 1.3 |
| KIF1B     | 0.017468 | -0.167036654 | 0.479 | 0.482 | 1 | 1.3 |
| ZNF207    | 0.018597 | -0.103342636 | 0.487 | 0.486 | 1 | 1.3 |
| FABP3     | 0.018916 | -0.146019155 | 0.01  | 0.017 | 1 | 1.3 |
| TBC1D10A  | 0.018989 | -0.310528518 | 0.105 | 0.12  | 1 | 1.3 |
| SVIL      | 0.019001 | -0.114413659 | 0.856 | 0.827 | 1 | 1.3 |
| HERC3     | 0.019489 | -0.167338596 | 0.143 | 0.16  | 1 | 1.3 |
| JAK1      | 0.019535 | -0.124685854 | 0.331 | 0.343 | 1 | 1.3 |
| SDK2      | 0.019769 | -0.176743895 | 0.059 | 0.073 | 1 | 1.3 |
| COPB1     | 0.020164 | -0.151275851 | 0.202 | 0.216 | 1 | 1.3 |
| RNF19B    | 0.020848 | -0.139120199 | 0.159 | 0.176 | 1 | 1.3 |
| NONO      | 0.021408 | -0.122474215 | 0.394 | 0.397 | 1 | 1.3 |
| UBA2      | 0.021638 | -0.116167149 | 0.129 | 0.146 | 1 | 1.3 |
| CSNK2A1   | 0.021656 | -0.118726661 | 0.189 | 0.205 | 1 | 1.3 |
| 2-Sep     | 0.021817 | -0.122955712 | 0.285 | 0.298 | 1 | 1.3 |
| RIC3      | 0.021944 | -0.271781361 | 0.08  | 0.093 | 1 | 1.3 |

|            |          |              |       |       |   |     |
|------------|----------|--------------|-------|-------|---|-----|
| RAC1       | 0.02208  | -0.12100184  | 0.494 | 0.486 | 1 | 1.3 |
| ZMYM5      | 0.022774 | -0.112914901 | 0.16  | 0.176 | 1 | 1.3 |
| TGFBR3     | 0.022834 | 0.104801219  | 0.211 | 0.186 | 1 | 1.3 |
| IST1       | 0.023595 | -0.140682803 | 0.281 | 0.291 | 1 | 1.3 |
| TJP2       | 0.023648 | -0.166905712 | 0.417 | 0.416 | 1 | 1.3 |
| FHIT       | 0.023689 | -0.129327421 | 0.375 | 0.39  | 1 | 1.3 |
| MARCO      | 0.023992 | -0.114547265 | 0.088 | 0.103 | 1 | 1.3 |
| MAFF       | 0.02401  | -0.141134825 | 0.192 | 0.206 | 1 | 1.3 |
| C8orf37-AS | 0.024324 | -0.132063168 | 0.258 | 0.272 | 1 | 1.3 |
| AGO2       | 0.024899 | -0.135111205 | 0.166 | 0.183 | 1 | 1.3 |
| EPB41L4B   | 0.025293 | -0.126163932 | 0.101 | 0.116 | 1 | 1.3 |
| CD55       | 0.025342 | -0.176956208 | 0.378 | 0.38  | 1 | 1.3 |
| MARCKSL1   | 0.025559 | -0.122452657 | 0.084 | 0.098 | 1 | 1.3 |
| UBE2D3     | 0.025575 | -0.117051125 | 0.567 | 0.561 | 1 | 1.3 |
| OFD1       | 0.0256   | -0.18541137  | 0.298 | 0.307 | 1 | 1.3 |
| FAM53C     | 0.026074 | -0.133056782 | 0.201 | 0.215 | 1 | 1.3 |
| CCL28      | 0.026565 | -0.157416315 | 0.708 | 0.706 | 1 | 1.3 |
| ELF5       | 0.02678  | -0.181336146 | 0.293 | 0.3   | 1 | 1.3 |
| BTG3       | 0.027232 | -0.121680939 | 0.183 | 0.198 | 1 | 1.3 |
| AREG       | 0.02754  | -0.127155756 | 0.088 | 0.102 | 1 | 1.3 |
| KRT19      | 0.02789  | -0.295903797 | 0.313 | 0.318 | 1 | 1.3 |
| DDX24      | 0.028191 | -0.153043534 | 0.644 | 0.62  | 1 | 1.3 |
| ACSL3      | 0.02861  | -0.173760373 | 0.253 | 0.264 | 1 | 1.3 |
| NDRG2      | 0.028669 | -0.161473342 | 0.246 | 0.259 | 1 | 1.3 |
| NDUFB1     | 0.029423 | -0.117506425 | 0.34  | 0.351 | 1 | 1.3 |
| RNMT       | 0.030246 | -0.172468565 | 0.372 | 0.373 | 1 | 1.3 |
| ZNF83      | 0.031482 | -0.1987394   | 0.357 | 0.359 | 1 | 1.3 |
| STRAP      | 0.031653 | -0.112978254 | 0.114 | 0.129 | 1 | 1.3 |
| YES1       | 0.032343 | -0.106976271 | 0.198 | 0.213 | 1 | 1.3 |
| DAB2IP     | 0.032656 | -0.103726119 | 0.103 | 0.118 | 1 | 1.3 |
| FOSL1      | 0.032874 | -0.119927669 | 0.089 | 0.103 | 1 | 1.3 |
| PCNX       | 0.033281 | -0.110848496 | 0.18  | 0.196 | 1 | 1.3 |
| FAM46A     | 0.033457 | -0.130171982 | 0.1   | 0.114 | 1 | 1.3 |
| NCKAP1     | 0.033729 | -0.131796406 | 0.41  | 0.409 | 1 | 1.3 |
| MYO1E      | 0.03423  | -0.188885585 | 0.498 | 0.484 | 1 | 1.3 |
| SPATS2L    | 0.034596 | -0.135870601 | 0.267 | 0.28  | 1 | 1.3 |
| RPL10A     | 0.034775 | -0.114051583 | 0.791 | 0.784 | 1 | 1.3 |
| RALA       | 0.034792 | -0.100970386 | 0.163 | 0.179 | 1 | 1.3 |
| RP1-313I6. | 0.036005 | -0.111079277 | 0.055 | 0.067 | 1 | 1.3 |
| DIP2B      | 0.03746  | -0.164305739 | 0.319 | 0.325 | 1 | 1.3 |
| WBP11      | 0.038432 | -0.108292572 | 0.118 | 0.132 | 1 | 1.3 |
| FOSB       | 0.040701 | -0.145338092 | 0.421 | 0.427 | 1 | 1.3 |
| NEK7       | 0.041657 | -0.108126589 | 0.192 | 0.206 | 1 | 1.3 |
| INTS6-AS1  | 0.041949 | -0.100257035 | 0.161 | 0.174 | 1 | 1.3 |
| SLC16A13   | 0.042505 | -0.194855563 | 0.045 | 0.055 | 1 | 1.3 |
| CRYAB      | 0.042627 | -0.10440277  | 0.55  | 0.501 | 1 | 1.3 |
| BNIP3L     | 0.042963 | -0.116865466 | 0.298 | 0.311 | 1 | 1.3 |

|          |          |              |       |       |   |     |
|----------|----------|--------------|-------|-------|---|-----|
| SF3B1    | 0.04448  | -0.125166753 | 0.355 | 0.359 | 1 | 1.3 |
| UQCRH    | 0.044953 | -0.104198806 | 0.868 | 0.849 | 1 | 1.3 |
| MIER1    | 0.045266 | -0.105065552 | 0.174 | 0.188 | 1 | 1.3 |
| NSA2     | 0.047063 | -0.125472842 | 0.42  | 0.419 | 1 | 1.3 |
| RCC1     | 0.047696 | -0.195976131 | 0.358 | 0.354 | 1 | 1.3 |
| LIMS1    | 0.047918 | -0.17006547  | 0.312 | 0.318 | 1 | 1.3 |
| GALNT1   | 0.048387 | -0.11087984  | 0.14  | 0.154 | 1 | 1.3 |
| FBLIM1   | 0.048484 | -0.125464349 | 0.137 | 0.149 | 1 | 1.3 |
| CYTH3    | 0.048561 | -0.127309911 | 0.077 | 0.088 | 1 | 1.3 |
| HIST1H4C | 0.048655 | -0.15512297  | 0.218 | 0.229 | 1 | 1.3 |
| ERGIC3   | 0.048732 | -0.15310862  | 0.364 | 0.364 | 1 | 1.3 |
| MCL1     | 0.0488   | -0.11886068  | 0.268 | 0.279 | 1 | 1.3 |
| CCNK     | 0.049332 | -0.114312826 | 0.114 | 0.127 | 1 | 1.3 |
| KDM7A    | 0.049577 | -0.124600965 | 0.341 | 0.344 | 1 | 1.3 |
| CAST     | 0.049892 | -0.160026101 | 0.561 | 0.538 | 1 | 1.3 |
| HADH     | 0.051891 | -0.209834486 | 0.197 | 0.208 | 1 | 1.3 |
| TNKS2    | 0.053875 | -0.128805746 | 0.252 | 0.261 | 1 | 1.3 |
| RBMS2    | 0.05448  | -0.119680614 | 0.143 | 0.156 | 1 | 1.3 |
| UGCG     | 0.055284 | -0.176815364 | 0.325 | 0.33  | 1 | 1.3 |
| TPTEP1   | 0.057066 | -0.130791355 | 0.225 | 0.235 | 1 | 1.3 |
| AMD1     | 0.058021 | -0.184436106 | 0.236 | 0.244 | 1 | 1.3 |
| GPBP1L1  | 0.058039 | -0.137369156 | 0.274 | 0.281 | 1 | 1.3 |
| SKP1     | 0.060748 | -0.12119625  | 0.851 | 0.833 | 1 | 1.3 |
| ZCCHC6   | 0.060859 | -0.148841686 | 0.344 | 0.345 | 1 | 1.3 |
| HMGXB4   | 0.061701 | -0.11383772  | 0.245 | 0.257 | 1 | 1.3 |
| CLMN     | 0.062346 | -0.175927311 | 0.613 | 0.583 | 1 | 1.3 |
| PPP1CB   | 0.066668 | -0.131666    | 0.427 | 0.419 | 1 | 1.3 |
| SAP18    | 0.06669  | -0.120161486 | 0.619 | 0.598 | 1 | 1.3 |
| PPFIA1   | 0.067928 | -0.122039247 | 0.266 | 0.274 | 1 | 1.3 |
| LRCH3    | 0.06804  | -0.124425041 | 0.365 | 0.366 | 1 | 1.3 |
| AKAP9    | 0.070473 | -0.108570544 | 0.355 | 0.364 | 1 | 1.3 |
| PTPN12   | 0.071363 | -0.134275299 | 0.43  | 0.425 | 1 | 1.3 |
| DOCK4    | 0.072922 | -0.145482405 | 0.395 | 0.344 | 1 | 1.3 |
| SUN1     | 0.074307 | -0.101081035 | 0.101 | 0.111 | 1 | 1.3 |
| SMURF2   | 0.075276 | -0.112548625 | 0.362 | 0.366 | 1 | 1.3 |
| ATF2     | 0.076388 | -0.108155782 | 0.125 | 0.136 | 1 | 1.3 |
| KEAP1    | 0.076776 | -0.105291105 | 0.035 | 0.043 | 1 | 1.3 |
| ZBTB10   | 0.07798  | -0.103459951 | 0.16  | 0.172 | 1 | 1.3 |
| KPNB1    | 0.07803  | -0.160216089 | 0.455 | 0.444 | 1 | 1.3 |
| ASTN2    | 0.079857 | -0.11011105  | 0.213 | 0.224 | 1 | 1.3 |
| BAZ1A    | 0.079973 | -0.126803442 | 0.317 | 0.32  | 1 | 1.3 |
| CDC27    | 0.08368  | -0.17469077  | 0.236 | 0.242 | 1 | 1.3 |
| FMNL2    | 0.084814 | -0.146772194 | 0.451 | 0.438 | 1 | 1.3 |
| SEPP1    | 0.085675 | -0.16604654  | 0.362 | 0.363 | 1 | 1.3 |
| RNF11    | 0.092001 | -0.116018055 | 0.15  | 0.159 | 1 | 1.3 |
| NKX3-1   | 0.095138 | -0.107164434 | 0.081 | 0.092 | 1 | 1.3 |
| WDR33    | 0.095208 | -0.103305083 | 0.31  | 0.314 | 1 | 1.3 |

|           |          |              |       |       |   |     |
|-----------|----------|--------------|-------|-------|---|-----|
| RUSC2     | 0.095387 | -0.127449697 | 0.113 | 0.124 | 1 | 1.3 |
| MON2      | 0.098904 | -0.125521836 | 0.253 | 0.259 | 1 | 1.3 |
| RP11-131L | 0.098911 | -0.110359502 | 0.069 | 0.078 | 1 | 1.3 |
| ELAVL1    | 0.099971 | -0.153131273 | 0.146 | 0.158 | 1 | 1.3 |
| CLU       | 0.102397 | -0.149968053 | 0.101 | 0.113 | 1 | 1.3 |
| SGMS1     | 0.103054 | -0.156803896 | 0.271 | 0.275 | 1 | 1.3 |
| CACUL1    | 0.103441 | -0.126093434 | 0.404 | 0.4   | 1 | 1.3 |
| LMTK2     | 0.104453 | -0.14065558  | 0.15  | 0.158 | 1 | 1.3 |
| ARHGEF12  | 0.10664  | -0.134466603 | 0.438 | 0.431 | 1 | 1.3 |
| UFM1      | 0.108839 | -0.121680948 | 0.352 | 0.352 | 1 | 1.3 |
| F3        | 0.109038 | -0.112450905 | 0.057 | 0.066 | 1 | 1.3 |
| B4GALT5   | 0.11179  | -0.122963273 | 0.332 | 0.335 | 1 | 1.3 |
| RAB3GAP1  | 0.112165 | -0.118311663 | 0.293 | 0.299 | 1 | 1.3 |
| TPK1      | 0.112921 | -0.120020113 | 0.257 | 0.263 | 1 | 1.3 |
| ITGA2     | 0.113621 | -0.325467404 | 0.482 | 0.455 | 1 | 1.3 |
| YWHAQ     | 0.114034 | -0.166536841 | 0.378 | 0.374 | 1 | 1.3 |
| DNAJB1    | 0.120134 | -0.152220124 | 0.098 | 0.106 | 1 | 1.3 |
| METAP1    | 0.132021 | -0.101861083 | 0.085 | 0.093 | 1 | 1.3 |
| NCOA7     | 0.132849 | -0.15069037  | 0.702 | 0.664 | 1 | 1.3 |
| BDNF-AS   | 0.133654 | -0.148303336 | 0.7   | 0.668 | 1 | 1.3 |
| MAP3K14   | 0.133709 | -0.101690876 | 0.069 | 0.078 | 1 | 1.3 |
| CTSV      | 0.137251 | -0.267887329 | 0.241 | 0.213 | 1 | 1.3 |
| LRCH1     | 0.141593 | -0.10573635  | 0.352 | 0.353 | 1 | 1.3 |
| AIMP1     | 0.142028 | -0.113321913 | 0.425 | 0.42  | 1 | 1.3 |
| MPZL3     | 0.142606 | -0.125866368 | 0.305 | 0.307 | 1 | 1.3 |
| RP11-519G | 0.143167 | -0.228845161 | 0.562 | 0.477 | 1 | 1.3 |
| TXLNG     | 0.144294 | -0.110279329 | 0.105 | 0.113 | 1 | 1.3 |
| SRGAP1    | 0.149741 | -0.146963514 | 0.321 | 0.322 | 1 | 1.3 |
| CTTNBP2N1 | 0.15029  | -0.132658583 | 0.283 | 0.283 | 1 | 1.3 |
| GADD45B   | 0.155528 | -0.109129814 | 0.048 | 0.056 | 1 | 1.3 |
| DSC2      | 0.157854 | -0.114489737 | 0.235 | 0.242 | 1 | 1.3 |
| KMT2E     | 0.159727 | -0.101955275 | 0.404 | 0.403 | 1 | 1.3 |
| MAP3K1    | 0.161651 | -0.12392311  | 0.207 | 0.214 | 1 | 1.3 |
| ZHX2      | 0.166334 | -0.105795917 | 0.35  | 0.349 | 1 | 1.3 |
| MYLK      | 0.168474 | 0.107665999  | 0.022 | 0.018 | 1 | 1.3 |
| SLU7      | 0.174717 | -0.100889567 | 0.134 | 0.142 | 1 | 1.3 |
| CHI3L1    | 0.179541 | -0.174868577 | 0.213 | 0.197 | 1 | 1.3 |
| FGF13     | 0.181308 | -0.191397306 | 0.214 | 0.219 | 1 | 1.3 |
| URB1      | 0.182776 | -0.17412545  | 0.065 | 0.057 | 1 | 1.3 |
| STOM      | 0.184159 | -0.101670966 | 0.192 | 0.199 | 1 | 1.3 |
| JARID2    | 0.188879 | -0.123822514 | 0.253 | 0.256 | 1 | 1.3 |
| EIF5      | 0.189011 | -0.137865586 | 0.199 | 0.204 | 1 | 1.3 |
| MAP4      | 0.190375 | -0.107554436 | 0.437 | 0.43  | 1 | 1.3 |
| MAP3K9    | 0.190507 | -0.101953591 | 0.167 | 0.175 | 1 | 1.3 |
| MTM1      | 0.19183  | -0.178823831 | 0.195 | 0.197 | 1 | 1.3 |
| GNAI3     | 0.193547 | -0.104466299 | 0.155 | 0.161 | 1 | 1.3 |
| NCOR1     | 0.194465 | -0.105373043 | 0.365 | 0.362 | 1 | 1.3 |

|           |          |              |       |       |   |     |
|-----------|----------|--------------|-------|-------|---|-----|
| AC074391. | 0.200004 | -0.152244731 | 0.05  | 0.057 | 1 | 1.3 |
| TTC19     | 0.221313 | -0.116133131 | 0.208 | 0.212 | 1 | 1.3 |
| YWHAG     | 0.227006 | -0.120721593 | 0.231 | 0.232 | 1 | 1.3 |
| SPCS2     | 0.227312 | -0.121710926 | 0.318 | 0.315 | 1 | 1.3 |
| EEA1      | 0.229739 | -0.102381853 | 0.159 | 0.165 | 1 | 1.3 |
| PDZD2     | 0.232622 | -0.103911475 | 0.555 | 0.544 | 1 | 1.3 |
| FAM208B   | 0.237021 | -0.107730021 | 0.186 | 0.19  | 1 | 1.3 |
| GNAS      | 0.250778 | -0.110993944 | 0.619 | 0.593 | 1 | 1.3 |
| WASF2     | 0.26175  | -0.102416279 | 0.214 | 0.216 | 1 | 1.3 |
| CXCL2     | 0.275055 | -0.165074992 | 0.274 | 0.252 | 1 | 1.3 |
| PIGR      | 0.278624 | -0.205394806 | 0.524 | 0.517 | 1 | 1.3 |
| EIF3K     | 0.291552 | -0.142112203 | 0.489 | 0.468 | 1 | 1.3 |
| HP        | 0.293275 | -0.131425917 | 0.026 | 0.03  | 1 | 1.3 |
| ATP8B1    | 0.294776 | -0.202357906 | 0.338 | 0.329 | 1 | 1.3 |
| CFLAR     | 0.297669 | -0.106830749 | 0.505 | 0.458 | 1 | 1.3 |
| KIF13A    | 0.303716 | -0.174522192 | 0.273 | 0.271 | 1 | 1.3 |
| AC090498. | 0.308283 | -0.102843981 | 0.399 | 0.386 | 1 | 1.3 |
| DPP6      | 0.311322 | -0.10227422  | 0.16  | 0.164 | 1 | 1.3 |
| DYNLL1    | 0.31997  | -0.137884068 | 0.231 | 0.231 | 1 | 1.3 |
| TPD52     | 0.320195 | -0.112436195 | 0.167 | 0.171 | 1 | 1.3 |
| ELF2      | 0.321147 | -0.110603811 | 0.326 | 0.323 | 1 | 1.3 |
| COPA      | 0.321307 | -0.104543338 | 0.354 | 0.345 | 1 | 1.3 |
| MUCL1     | 0.342775 | -0.112208542 | 0.15  | 0.154 | 1 | 1.3 |
| KAT6A     | 0.36768  | -0.123601329 | 0.249 | 0.249 | 1 | 1.3 |
| MLF1      | 0.377793 | -0.101124482 | 0.227 | 0.229 | 1 | 1.3 |
| RP11-6590 | 0.414641 | -0.106411219 | 0.187 | 0.188 | 1 | 1.3 |
| MET       | 0.41854  | -0.178137481 | 0.365 | 0.349 | 1 | 1.3 |
| P4HA1     | 0.420909 | -0.185542745 | 0.274 | 0.269 | 1 | 1.3 |
| DBI       | 0.424743 | -0.11072512  | 0.74  | 0.679 | 1 | 1.3 |
| SCGB2A2   | 0.452876 | -0.364408525 | 0.199 | 0.187 | 1 | 1.3 |
| SAA4      | 0.464946 | -0.155873096 | 0.283 | 0.277 | 1 | 1.3 |
| SMCHD1    | 0.470536 | -0.10193438  | 0.295 | 0.288 | 1 | 1.3 |
| SOS2      | 0.471498 | -0.101970188 | 0.489 | 0.462 | 1 | 1.3 |
| STK39     | 0.494813 | -0.317533156 | 0.129 | 0.131 | 1 | 1.3 |
| RASAL2    | 0.530015 | -0.259003074 | 0.569 | 0.532 | 1 | 1.3 |
| CXCL13    | 0.540926 | -0.104075976 | 0.099 | 0.101 | 1 | 1.3 |
| PRSS8     | 0.554475 | -0.164229697 | 0.059 | 0.062 | 1 | 1.3 |
| HMOX1     | 0.567962 | -0.10664252  | 0.061 | 0.064 | 1 | 1.3 |
| KCTD9     | 0.577169 | -0.120373797 | 0.306 | 0.299 | 1 | 1.3 |
| DHX15     | 0.580352 | -0.115010062 | 0.214 | 0.208 | 1 | 1.3 |
| CYCS      | 0.594623 | -0.146418714 | 0.565 | 0.537 | 1 | 1.3 |
| PDK3      | 0.606609 | -0.12712807  | 0.295 | 0.277 | 1 | 1.3 |
| DFNB59    | 0.618974 | -0.145919859 | 0.019 | 0.02  | 1 | 1.3 |
| SLC25A33  | 0.620469 | -0.135755517 | 0.134 | 0.135 | 1 | 1.3 |
| HSD17B6   | 0.670151 | -0.11423179  | 0.034 | 0.036 | 1 | 1.3 |
| HIF1A-AS2 | 0.675796 | -0.100502068 | 0.149 | 0.142 | 1 | 1.3 |
| LALBA     | 0.692904 | -0.22877235  | 0.014 | 0.013 | 1 | 1.3 |



|           |           |              |       |       |           |     |
|-----------|-----------|--------------|-------|-------|-----------|-----|
| PTP4A1    | 0.780262  | -0.140906752 | 0.218 | 0.208 | 1         | 1.3 |
| LDHA      | 0.78405   | -0.269790041 | 0.766 | 0.703 | 1         | 1.3 |
| SNX9      | 0.805627  | -0.116831093 | 0.472 | 0.443 | 1         | 1.3 |
| KRT23     | 0.815313  | -0.178467906 | 0.249 | 0.24  | 1         | 1.3 |
| SH3RF1    | 0.837511  | -0.102205949 | 0.248 | 0.239 | 1         | 1.3 |
| COL6A2    | 0.849262  | -0.136125738 | 0.145 | 0.14  | 1         | 1.3 |
| PLAUR     | 0.856633  | -0.166045286 | 0.19  | 0.183 | 1         | 1.3 |
| EPB41L2   | 0.877673  | -0.189438418 | 0.198 | 0.19  | 1         | 1.3 |
| GEMIN5    | 0.882807  | -0.106501394 | 0.025 | 0.024 | 1         | 1.3 |
| RHOA      | 0.926974  | -0.118931397 | 0.443 | 0.414 | 1         | 1.3 |
| LRRFIP1   | 0.966236  | -0.161086036 | 0.55  | 0.504 | 1         | 1.3 |
| TMEM41B   | 0.973662  | -0.124614428 | 0.205 | 0.195 | 1         | 1.3 |
| TGFB2     | 0.975122  | -0.137075598 | 0.251 | 0.241 | 1         | 1.3 |
| DMD       | 0.980325  | -0.139883771 | 0.494 | 0.463 | 1         | 1.3 |
| PPP3CA    | 0.998419  | -0.152103461 | 0.433 | 0.406 | 1         | 1.3 |
| KYNU      | 0         | 2.205536398  | 0.777 | 0.24  | 0         | 1.4 |
| LTF       | 0         | 1.592857415  | 0.932 | 0.572 | 0         | 1.4 |
| RARRES1   | 0         | 1.344866824  | 0.716 | 0.289 | 0         | 1.4 |
| ARHGAP26  | 0         | 1.283934291  | 0.982 | 0.782 | 0         | 1.4 |
| DOCK4     | 0         | 1.495407426  | 0.699 | 0.237 | 0         | 1.4 |
| SAA1      | 0         | 1.461089045  | 0.995 | 0.94  | 0         | 1.4 |
| FRMD4A    | 0         | 1.403947291  | 0.796 | 0.366 | 0         | 1.4 |
| FBLN5     | 0         | 1.528613996  | 0.664 | 0.219 | 0         | 1.4 |
| RP11-519G | 0         | 1.243928886  | 0.816 | 0.386 | 0         | 1.4 |
| ANXA2     | 0         | -1.427126542 | 0.851 | 0.944 | 0         | 1.4 |
| PSTPIP2   | 0         | 1.189775516  | 0.67  | 0.247 | 0         | 1.4 |
| EVA1C     | 0         | 1.402371579  | 0.802 | 0.324 | 0         | 1.4 |
| ST5       | 7.67E-307 | 1.23631877   | 0.693 | 0.285 | 1.85E-302 | 1.4 |
| TXNIP     | 2.20E-293 | 1.323714407  | 0.745 | 0.364 | 5.31E-289 | 1.4 |
| MYL6      | 1.41E-285 | -1.007230595 | 0.892 | 0.955 | 3.40E-281 | 1.4 |
| CHI3L1    | 8.88E-284 | 1.796617321  | 0.453 | 0.112 | 2.14E-279 | 1.4 |
| USP53     | 1.94E-279 | -1.909307633 | 0.444 | 0.747 | 4.67E-275 | 1.4 |
| ALPK1     | 6.28E-277 | 1.057591189  | 0.575 | 0.203 | 1.51E-272 | 1.4 |
| OVOS2     | 1.93E-276 | 1.449916928  | 0.769 | 0.406 | 4.66E-272 | 1.4 |
| VNN3      | 3.14E-276 | 1.281850715  | 0.539 | 0.176 | 7.58E-272 | 1.4 |
| ANK3      | 6.93E-273 | 1.086414117  | 0.626 | 0.244 | 1.67E-268 | 1.4 |
| TRIO      | 5.86E-272 | -1.549327476 | 0.561 | 0.808 | 1.41E-267 | 1.4 |
| CHODL     | 7.11E-271 | 1.202824057  | 0.446 | 0.115 | 1.71E-266 | 1.4 |
| CHI3L2    | 2.51E-262 | 1.393928747  | 0.761 | 0.407 | 6.06E-258 | 1.4 |
| SAA2-SAA4 | 9.54E-261 | 1.032678828  | 0.661 | 0.274 | 2.30E-256 | 1.4 |
| LYN       | 5.34E-257 | 0.940933141  | 0.922 | 0.606 | 1.29E-252 | 1.4 |
| DCHS2     | 4.85E-254 | 1.059778792  | 0.362 | 0.074 | 1.17E-249 | 1.4 |
| MYL12A    | 5.40E-253 | -1.162754829 | 0.775 | 0.888 | 1.30E-248 | 1.4 |
| PLEKHS1   | 2.12E-249 | 1.015432652  | 0.521 | 0.17  | 5.11E-245 | 1.4 |
| TRPS1     | 1.60E-243 | 1.016337323  | 0.909 | 0.651 | 3.86E-239 | 1.4 |
| MGAM2     | 1.70E-236 | 1.139348159  | 0.603 | 0.245 | 4.10E-232 | 1.4 |
| SLC34A2   | 3.64E-235 | 0.944767307  | 0.542 | 0.195 | 8.78E-231 | 1.4 |

|           |           |              |       |       |           |     |
|-----------|-----------|--------------|-------|-------|-----------|-----|
| TNFAIP2   | 2.56E-229 | 1.318299826  | 0.555 | 0.207 | 6.18E-225 | 1.4 |
| CNTN4     | 1.30E-227 | 1.14523347   | 0.419 | 0.118 | 3.14E-223 | 1.4 |
| RASGRP1   | 6.41E-220 | 0.835476927  | 0.33  | 0.071 | 1.55E-215 | 1.4 |
| CCND3     | 1.64E-219 | 0.956961066  | 0.62  | 0.265 | 3.95E-215 | 1.4 |
| CYP1B1    | 7.57E-219 | 0.909108641  | 0.308 | 0.061 | 1.83E-214 | 1.4 |
| ANXA1     | 9.01E-217 | -1.30147723  | 0.841 | 0.929 | 2.17E-212 | 1.4 |
| LDHA      | 3.23E-216 | -1.329112757 | 0.568 | 0.772 | 7.78E-212 | 1.4 |
| AGAP1     | 2.55E-213 | 1.005961861  | 0.834 | 0.542 | 6.14E-209 | 1.4 |
| SERPINB7  | 2.38E-212 | 1.243590792  | 0.41  | 0.121 | 5.75E-208 | 1.4 |
| ITGA2     | 7.14E-208 | -1.631295003 | 0.218 | 0.548 | 1.72E-203 | 1.4 |
| CYP7B1    | 1.10E-206 | 1.046731403  | 0.636 | 0.284 | 2.64E-202 | 1.4 |
| 3-Mar     | 9.13E-202 | 1.103563983  | 0.424 | 0.134 | 2.20E-197 | 1.4 |
| C15orf48  | 1.67E-198 | 1.267512275  | 0.722 | 0.404 | 4.03E-194 | 1.4 |
| NR2F2-AS1 | 9.53E-194 | 0.820775618  | 0.322 | 0.077 | 2.30E-189 | 1.4 |
| ITPR2     | 6.99E-187 | 0.935433084  | 0.774 | 0.463 | 1.68E-182 | 1.4 |
| OSER1     | 1.01E-185 | -1.642478526 | 0.365 | 0.615 | 2.43E-181 | 1.4 |
| CCL2      | 1.05E-183 | 0.907035226  | 0.676 | 0.346 | 2.54E-179 | 1.4 |
| FOXP1     | 2.49E-183 | 0.83340617   | 0.786 | 0.468 | 6.00E-179 | 1.4 |
| THADA     | 4.11E-178 | 1.049638232  | 0.493 | 0.196 | 9.90E-174 | 1.4 |
| PIK3R1    | 1.24E-177 | 0.911320564  | 0.486 | 0.189 | 2.98E-173 | 1.4 |
| RASA2     | 7.49E-177 | -1.274193399 | 0.457 | 0.693 | 1.81E-172 | 1.4 |
| CHPT1     | 1.91E-173 | 1.045480389  | 0.614 | 0.307 | 4.60E-169 | 1.4 |
| SOD2      | 7.89E-173 | 0.568047328  | 0.997 | 0.927 | 1.90E-168 | 1.4 |
| ZNF518A   | 2.47E-172 | 0.755402468  | 0.377 | 0.12  | 5.96E-168 | 1.4 |
| PADI2     | 3.06E-171 | 0.775390635  | 0.368 | 0.113 | 7.38E-167 | 1.4 |
| CFB       | 3.02E-169 | 0.718002257  | 0.303 | 0.077 | 7.29E-165 | 1.4 |
| FBN1      | 5.27E-169 | 0.579653982  | 0.156 | 0.012 | 1.27E-164 | 1.4 |
| TM4SF1    | 3.08E-165 | -1.340895275 | 0.85  | 0.914 | 7.44E-161 | 1.4 |
| UBC       | 1.17E-164 | -1.392130768 | 0.919 | 0.96  | 2.81E-160 | 1.4 |
| KRT15     | 1.78E-161 | -1.483842828 | 0.124 | 0.418 | 4.29E-157 | 1.4 |
| PBX1      | 7.93E-161 | 0.845382597  | 0.418 | 0.155 | 1.91E-156 | 1.4 |
| SLFN5     | 1.48E-160 | 0.686759334  | 0.56  | 0.252 | 3.56E-156 | 1.4 |
| PDZRN3    | 3.81E-160 | 0.803377768  | 0.37  | 0.121 | 9.20E-156 | 1.4 |
| SORBS2    | 1.09E-158 | 0.979730565  | 0.78  | 0.507 | 2.64E-154 | 1.4 |
| TNFAIP6   | 1.74E-157 | 0.932259801  | 0.654 | 0.336 | 4.18E-153 | 1.4 |
| MAST4     | 3.06E-157 | 1.006728959  | 0.595 | 0.308 | 7.38E-153 | 1.4 |
| FABP7     | 4.74E-156 | 2.096895793  | 0.4   | 0.159 | 1.14E-151 | 1.4 |
| CA8       | 7.11E-155 | 0.800825935  | 0.665 | 0.36  | 1.71E-150 | 1.4 |
| SCARA3    | 3.94E-154 | 0.596998726  | 0.181 | 0.025 | 9.50E-150 | 1.4 |
| CLU       | 7.10E-154 | 1.079467796  | 0.256 | 0.059 | 1.71E-149 | 1.4 |
| ANKS1B    | 1.99E-153 | 0.798850521  | 0.479 | 0.199 | 4.79E-149 | 1.4 |
| MYO5B     | 3.25E-151 | -1.353146214 | 0.433 | 0.656 | 7.84E-147 | 1.4 |
| MLLT4     | 1.62E-149 | -1.100780721 | 0.52  | 0.712 | 3.90E-145 | 1.4 |
| SLC25A37  | 1.06E-148 | 0.663869602  | 0.892 | 0.638 | 2.57E-144 | 1.4 |
| C4orf19   | 1.78E-148 | 0.779771402  | 0.365 | 0.126 | 4.28E-144 | 1.4 |
| HSD11B1   | 9.21E-147 | 0.811061142  | 0.377 | 0.133 | 2.22E-142 | 1.4 |
| RP11-739G | 1.14E-146 | 0.700411086  | 0.131 | 0.009 | 2.76E-142 | 1.4 |

|                   |           |              |       |       |           |     |
|-------------------|-----------|--------------|-------|-------|-----------|-----|
| DDX21             | 4.33E-146 | -1.038512022 | 0.49  | 0.674 | 1.05E-141 | 1.4 |
| RP11-114H         | 1.57E-143 | 1.027597336  | 0.357 | 0.125 | 3.78E-139 | 1.4 |
| LRIG1             | 5.96E-143 | 0.828406575  | 0.438 | 0.178 | 1.44E-138 | 1.4 |
| DPYD              | 3.92E-142 | 0.679368822  | 0.755 | 0.453 | 9.45E-138 | 1.4 |
| SORBS1            | 8.35E-141 | 0.71207925   | 0.555 | 0.27  | 2.01E-136 | 1.4 |
| CADPS2            | 1.27E-139 | 0.71538376   | 0.517 | 0.238 | 3.06E-135 | 1.4 |
| C3                | 1.32E-139 | 0.715057473  | 0.508 | 0.232 | 3.19E-135 | 1.4 |
| PTPN2             | 3.14E-138 | 0.715132056  | 0.578 | 0.301 | 7.57E-134 | 1.4 |
| SELK              | 4.32E-138 | -0.999683871 | 0.551 | 0.718 | 1.04E-133 | 1.4 |
| RIN2              | 2.62E-137 | 0.725522443  | 0.514 | 0.24  | 6.31E-133 | 1.4 |
| PODXL             | 4.08E-137 | 0.67004918   | 0.36  | 0.128 | 9.85E-133 | 1.4 |
| C10orf90          | 1.22E-136 | 0.615399565  | 0.25  | 0.063 | 2.94E-132 | 1.4 |
| SLC39A8           | 1.74E-134 | 0.81244753   | 0.302 | 0.095 | 4.19E-130 | 1.4 |
| SIK2              | 3.67E-134 | 0.755804819  | 0.526 | 0.256 | 8.84E-130 | 1.4 |
| JARID2            | 7.66E-134 | 0.799444146  | 0.44  | 0.19  | 1.85E-129 | 1.4 |
| RAPGEF5           | 2.15E-133 | 0.718087245  | 0.694 | 0.407 | 5.18E-129 | 1.4 |
| FMN1              | 2.33E-133 | 0.708524212  | 0.331 | 0.111 | 5.62E-129 | 1.4 |
| SKP1              | 1.13E-132 | -0.749969605 | 0.766 | 0.863 | 2.74E-128 | 1.4 |
| EMP1              | 1.25E-132 | -1.309343644 | 0.62  | 0.754 | 3.02E-128 | 1.4 |
| PLPP3             | 1.52E-132 | 0.815886702  | 0.404 | 0.163 | 3.68E-128 | 1.4 |
| MARCO             | 8.11E-132 | 0.629233114  | 0.227 | 0.054 | 1.95E-127 | 1.4 |
| SMARCA2           | 2.13E-131 | 0.690689632  | 0.495 | 0.233 | 5.13E-127 | 1.4 |
| FDCSP             | 3.87E-130 | 2.56175661   | 0.364 | 0.149 | 9.33E-126 | 1.4 |
| GLIPR1            | 1.42E-129 | -1.212591426 | 0.16  | 0.412 | 3.42E-125 | 1.4 |
| FAAH2             | 5.10E-129 | 0.665447976  | 0.385 | 0.15  | 1.23E-124 | 1.4 |
| ACTB              | 3.51E-128 | -1.061329435 | 0.475 | 0.665 | 8.46E-124 | 1.4 |
| FTX               | 4.08E-128 | 0.698161373  | 0.755 | 0.468 | 9.83E-124 | 1.4 |
| PLXDC2            | 7.22E-128 | 0.682492661  | 0.42  | 0.175 | 1.74E-123 | 1.4 |
| MYL12B            | 4.01E-127 | -0.885450703 | 0.614 | 0.75  | 9.66E-123 | 1.4 |
| S100A8            | 1.22E-126 | 2.060650802  | 0.381 | 0.158 | 2.95E-122 | 1.4 |
| RP11-519G         | 1.64E-126 | 0.722076503  | 0.214 | 0.05  | 3.95E-122 | 1.4 |
| SLC26A2           | 9.77E-126 | 0.767763552  | 0.313 | 0.106 | 2.36E-121 | 1.4 |
| ZBTB20            | 4.06E-125 | 0.683274831  | 0.691 | 0.408 | 9.79E-121 | 1.4 |
| ITFG1             | 4.22E-125 | 0.65489094   | 0.426 | 0.181 | 1.02E-120 | 1.4 |
| ZNF521            | 1.30E-124 | 0.726441773  | 0.345 | 0.128 | 3.13E-120 | 1.4 |
| C1QTNF3- <i>A</i> | 3.29E-124 | 0.653236698  | 0.391 | 0.156 | 7.93E-120 | 1.4 |
| GCNT2             | 7.38E-124 | 0.745029061  | 0.56  | 0.295 | 1.78E-119 | 1.4 |
| ESR1              | 4.04E-122 | 0.63910071   | 0.277 | 0.086 | 9.75E-118 | 1.4 |
| NOS1AP            | 1.35E-121 | 0.782196426  | 0.31  | 0.107 | 3.25E-117 | 1.4 |
| OSMR              | 2.35E-121 | 0.685241537  | 0.574 | 0.304 | 5.67E-117 | 1.4 |
| HSP90AB1          | 4.28E-121 | -0.58566899  | 0.912 | 0.946 | 1.03E-116 | 1.4 |
| RP11-266O         | 1.64E-120 | 0.648703098  | 0.14  | 0.019 | 3.94E-116 | 1.4 |
| LBP               | 2.08E-120 | 0.53896989   | 0.11  | 0.008 | 5.01E-116 | 1.4 |
| AUTS2             | 4.34E-120 | 0.641317485  | 0.757 | 0.495 | 1.05E-115 | 1.4 |
| TLR2              | 2.33E-119 | 0.638948194  | 0.436 | 0.194 | 5.62E-115 | 1.4 |
| TNFSF10           | 5.64E-119 | 0.675101456  | 0.686 | 0.424 | 1.36E-114 | 1.4 |
| ADAM9             | 1.96E-118 | -0.982434767 | 0.43  | 0.631 | 4.72E-114 | 1.4 |

|           |           |              |       |       |           |     |
|-----------|-----------|--------------|-------|-------|-----------|-----|
| TMSB4X    | 1.45E-117 | -0.866554854 | 0.83  | 0.909 | 3.50E-113 | 1.4 |
| HSPA5     | 2.72E-116 | -1.688263564 | 0.23  | 0.454 | 6.57E-112 | 1.4 |
| KIT       | 1.15E-114 | 0.646473011  | 0.565 | 0.297 | 2.78E-110 | 1.4 |
| N4BP2L2   | 1.19E-114 | 0.545888163  | 0.883 | 0.667 | 2.87E-110 | 1.4 |
| RORA      | 3.65E-114 | 0.706667708  | 0.668 | 0.421 | 8.79E-110 | 1.4 |
| TBC1D5    | 1.35E-113 | 0.647060057  | 0.547 | 0.288 | 3.26E-109 | 1.4 |
| OSMR-AS1  | 4.27E-113 | 0.604739725  | 0.356 | 0.141 | 1.03E-108 | 1.4 |
| TNIP3     | 9.50E-113 | 0.481925146  | 0.185 | 0.041 | 2.29E-108 | 1.4 |
| CLEC7A    | 2.58E-110 | 0.558522709  | 0.258 | 0.082 | 6.23E-106 | 1.4 |
| CTD-2015G | 5.21E-110 | 0.57802008   | 0.332 | 0.127 | 1.26E-105 | 1.4 |
| RP11-449D | 6.29E-108 | 0.599225868  | 0.198 | 0.049 | 1.52E-103 | 1.4 |
| CACNB2    | 1.93E-107 | 0.602938631  | 0.28  | 0.095 | 4.66E-103 | 1.4 |
| COL27A1   | 7.96E-107 | 0.647449616  | 0.214 | 0.058 | 1.92E-102 | 1.4 |
| FHIT      | 2.24E-106 | 0.729788336  | 0.57  | 0.322 | 5.40E-102 | 1.4 |
| C1S       | 2.53E-106 | 0.465654162  | 0.24  | 0.072 | 6.10E-102 | 1.4 |
| LINC01344 | 2.04E-104 | 0.442643159  | 0.119 | 0.015 | 4.91E-100 | 1.4 |
| TPST1     | 2.14E-104 | 0.634399034  | 0.282 | 0.098 | 5.16E-100 | 1.4 |
| LRRFIP2   | 2.34E-104 | -1.068995989 | 0.767 | 0.83  | 5.65E-100 | 1.4 |
| GLIPR2    | 1.16E-103 | 0.548689946  | 0.253 | 0.083 | 2.80E-99  | 1.4 |
| MAP3K5    | 5.81E-103 | 0.631005058  | 0.502 | 0.258 | 1.40E-98  | 1.4 |
| THRB      | 1.25E-101 | 0.608114251  | 0.473 | 0.235 | 3.02E-97  | 1.4 |
| CDC42     | 1.92E-101 | -0.735265224 | 0.612 | 0.733 | 4.62E-97  | 1.4 |
| GLUL      | 1.93E-101 | 0.787461681  | 0.494 | 0.265 | 4.65E-97  | 1.4 |
| TRABD2B   | 2.48E-101 | 0.606323492  | 0.22  | 0.064 | 5.97E-97  | 1.4 |
| PPP2R3A   | 2.46E-99  | 0.606734183  | 0.593 | 0.345 | 5.94E-95  | 1.4 |
| UST       | 2.23E-98  | 0.66245029   | 0.409 | 0.19  | 5.38E-94  | 1.4 |
| CNN3      | 4.34E-98  | -0.876943508 | 0.312 | 0.515 | 1.05E-93  | 1.4 |
| PARK2     | 1.90E-97  | 0.575271753  | 0.305 | 0.117 | 4.58E-93  | 1.4 |
| LRRFIP1   | 2.29E-97  | -0.851703851 | 0.381 | 0.563 | 5.52E-93  | 1.4 |
| CYCS      | 3.00E-97  | -0.886799134 | 0.407 | 0.592 | 7.22E-93  | 1.4 |
| PPP1R9A   | 9.32E-97  | 0.59711336   | 0.355 | 0.153 | 2.25E-92  | 1.4 |
| SPIDR     | 5.46E-96  | 0.579679874  | 0.769 | 0.529 | 1.32E-91  | 1.4 |
| GHR       | 6.47E-96  | 0.658464803  | 0.264 | 0.093 | 1.56E-91  | 1.4 |
| RGL1      | 8.73E-95  | 0.468252491  | 0.198 | 0.055 | 2.11E-90  | 1.4 |
| PROM1     | 1.52E-94  | 0.608393092  | 0.64  | 0.392 | 3.67E-90  | 1.4 |
| IFITM3    | 1.81E-94  | 0.65695729   | 0.408 | 0.2   | 4.37E-90  | 1.4 |
| DENND2D   | 2.19E-94  | 0.465997416  | 0.259 | 0.091 | 5.28E-90  | 1.4 |
| SERPINB4  | 2.24E-94  | 1.419171832  | 0.202 | 0.059 | 5.40E-90  | 1.4 |
| CYR61     | 4.72E-94  | -1.804936101 | 0.135 | 0.338 | 1.14E-89  | 1.4 |
| PLA2R1    | 4.73E-94  | 0.621531037  | 0.393 | 0.184 | 1.14E-89  | 1.4 |
| AC016995. | 5.90E-94  | 0.685799268  | 0.339 | 0.148 | 1.42E-89  | 1.4 |
| RP11-142C | 2.96E-93  | 0.535513762  | 0.239 | 0.08  | 7.13E-89  | 1.4 |
| LIPH      | 1.63E-92  | -1.207928839 | 0.32  | 0.522 | 3.94E-88  | 1.4 |
| KIAA1217  | 3.12E-92  | 0.498824678  | 0.932 | 0.784 | 7.51E-88  | 1.4 |
| SLC5A6    | 5.30E-92  | 0.491999625  | 0.255 | 0.09  | 1.28E-87  | 1.4 |
| HSP90B1   | 6.92E-92  | -1.006908695 | 0.33  | 0.517 | 1.67E-87  | 1.4 |
| HSP90AA1  | 7.98E-92  | -0.687717744 | 0.901 | 0.922 | 1.92E-87  | 1.4 |

|           |          |              |       |       |          |     |
|-----------|----------|--------------|-------|-------|----------|-----|
| CALD1     | 2.00E-91 | -1.046620739 | 0.474 | 0.642 | 4.82E-87 | 1.4 |
| PPM1H     | 3.07E-91 | 0.623011877  | 0.555 | 0.318 | 7.41E-87 | 1.4 |
| HIVEP3    | 3.23E-91 | 0.73338925   | 0.484 | 0.26  | 7.78E-87 | 1.4 |
| HS3ST4    | 4.28E-91 | 0.611879276  | 0.516 | 0.286 | 1.03E-86 | 1.4 |
| FBXL17    | 1.10E-90 | 0.592333055  | 0.327 | 0.137 | 2.66E-86 | 1.4 |
| RAD51B    | 2.29E-90 | 0.585556293  | 0.373 | 0.172 | 5.53E-86 | 1.4 |
| HIST1H2AC | 6.90E-90 | 0.649973128  | 0.483 | 0.261 | 1.66E-85 | 1.4 |
| SAMD12    | 1.04E-89 | 0.607835067  | 0.421 | 0.207 | 2.52E-85 | 1.4 |
| CLDN1     | 1.79E-89 | -1.246775364 | 0.268 | 0.464 | 4.32E-85 | 1.4 |
| UBD       | 3.42E-88 | 1.011053808  | 0.301 | 0.123 | 8.24E-84 | 1.4 |
| SERPINA3  | 4.69E-88 | 0.733551482  | 0.365 | 0.166 | 1.13E-83 | 1.4 |
| GBE1      | 1.72E-87 | -1.087608225 | 0.248 | 0.451 | 4.15E-83 | 1.4 |
| HMG3      | 1.27E-86 | 0.481091069  | 0.299 | 0.122 | 3.06E-82 | 1.4 |
| TSC22D2   | 2.56E-86 | -1.057367386 | 0.179 | 0.375 | 6.17E-82 | 1.4 |
| SLC11A2   | 5.08E-86 | 0.517876414  | 0.607 | 0.367 | 1.22E-81 | 1.4 |
| NALCN     | 2.64E-85 | 0.512235138  | 0.279 | 0.11  | 6.37E-81 | 1.4 |
| MAP1B     | 3.58E-85 | -0.869763395 | 0.259 | 0.461 | 8.63E-81 | 1.4 |
| EIF2AK3   | 1.04E-84 | -1.120876932 | 0.157 | 0.35  | 2.50E-80 | 1.4 |
| LINC01138 | 1.64E-84 | 0.526834186  | 0.376 | 0.179 | 3.96E-80 | 1.4 |
| KREMEN1   | 2.58E-84 | 0.402982285  | 0.164 | 0.042 | 6.22E-80 | 1.4 |
| RPL24     | 4.06E-84 | -0.42507193  | 0.936 | 0.96  | 9.80E-80 | 1.4 |
| CORO1C    | 5.79E-84 | -0.788855897 | 0.097 | 0.285 | 1.40E-79 | 1.4 |
| MEIS2     | 1.84E-83 | 0.563582149  | 0.405 | 0.203 | 4.44E-79 | 1.4 |
| ABCC4     | 2.23E-83 | 0.396583195  | 0.1   | 0.014 | 5.37E-79 | 1.4 |
| ARID1B    | 2.77E-83 | 0.528543671  | 0.575 | 0.349 | 6.69E-79 | 1.4 |
| SLC28A3   | 3.33E-83 | 0.49979719   | 0.536 | 0.299 | 8.03E-79 | 1.4 |
| LDLRAD4   | 4.30E-83 | 0.565029271  | 0.304 | 0.129 | 1.04E-78 | 1.4 |
| LINC00152 | 8.31E-83 | -0.959102302 | 0.204 | 0.393 | 2.00E-78 | 1.4 |
| RELB      | 1.58E-82 | 0.48706496   | 0.272 | 0.107 | 3.80E-78 | 1.4 |
| SMS       | 7.39E-82 | -0.985945056 | 0.252 | 0.439 | 1.78E-77 | 1.4 |
| SMARCD3   | 2.72E-81 | 0.32576209   | 0.099 | 0.014 | 6.55E-77 | 1.4 |
| FAM20A    | 2.83E-80 | 0.403462338  | 0.156 | 0.04  | 6.83E-76 | 1.4 |
| EXOC4     | 4.86E-80 | 0.54211448   | 0.448 | 0.24  | 1.17E-75 | 1.4 |
| GMDS-AS1  | 8.52E-80 | 0.581798458  | 0.224 | 0.079 | 2.05E-75 | 1.4 |
| CCDC170   | 8.92E-80 | 0.358847176  | 0.113 | 0.02  | 2.15E-75 | 1.4 |
| TMTC2     | 1.24E-79 | 0.522706784  | 0.47  | 0.255 | 2.99E-75 | 1.4 |
| CP        | 1.46E-79 | 0.460164489  | 0.153 | 0.039 | 3.53E-75 | 1.4 |
| CCSER1    | 7.83E-79 | 0.54820662   | 0.685 | 0.471 | 1.89E-74 | 1.4 |
| NCOA7     | 7.89E-79 | 0.515878293  | 0.813 | 0.624 | 1.90E-74 | 1.4 |
| HSD17B4   | 1.97E-78 | 0.468054123  | 0.284 | 0.118 | 4.75E-74 | 1.4 |
| GAB1      | 3.02E-78 | 0.665384326  | 0.515 | 0.308 | 7.29E-74 | 1.4 |
| CRYAB     | 5.72E-78 | -1.040071206 | 0.391 | 0.556 | 1.38E-73 | 1.4 |
| OSBPL9    | 1.27E-77 | -0.981591345 | 0.342 | 0.505 | 3.07E-73 | 1.4 |
| PNISR     | 2.36E-77 | 0.462098204  | 0.879 | 0.725 | 5.68E-73 | 1.4 |
| CDH1      | 2.76E-77 | -0.769842975 | 0.391 | 0.561 | 6.65E-73 | 1.4 |
| OSBPL1A   | 2.81E-77 | 0.453411406  | 0.266 | 0.107 | 6.77E-73 | 1.4 |
| ENOSF1    | 2.93E-77 | 0.522042275  | 0.358 | 0.173 | 7.06E-73 | 1.4 |

|            |          |              |       |       |          |     |
|------------|----------|--------------|-------|-------|----------|-----|
| BRE        | 5.21E-77 | 0.525757522  | 0.297 | 0.13  | 1.26E-72 | 1.4 |
| C1RL       | 6.21E-77 | 0.476757602  | 0.229 | 0.084 | 1.50E-72 | 1.4 |
| NCOA1      | 6.22E-77 | 0.571271598  | 0.561 | 0.347 | 1.50E-72 | 1.4 |
| MTHFD2L    | 6.75E-77 | 0.430513775  | 0.773 | 0.56  | 1.63E-72 | 1.4 |
| MBD5       | 8.90E-77 | 0.506051185  | 0.414 | 0.215 | 2.15E-72 | 1.4 |
| C1R        | 1.76E-76 | 0.403903916  | 0.162 | 0.046 | 4.25E-72 | 1.4 |
| GNF        | 4.48E-76 | 0.491309119  | 0.303 | 0.133 | 1.08E-71 | 1.4 |
| SERPINB3   | 7.02E-76 | 1.164295692  | 0.174 | 0.053 | 1.69E-71 | 1.4 |
| MOB3B      | 5.04E-75 | 0.456156348  | 0.386 | 0.194 | 1.21E-70 | 1.4 |
| RTN4       | 2.46E-74 | -0.683956824 | 0.532 | 0.661 | 5.93E-70 | 1.4 |
| GXYLT2     | 3.19E-74 | 0.397906702  | 0.177 | 0.055 | 7.68E-70 | 1.4 |
| PSME4      | 3.46E-74 | -0.830748176 | 0.635 | 0.724 | 8.34E-70 | 1.4 |
| PDZK1IP1   | 3.80E-74 | 0.603098643  | 0.294 | 0.129 | 9.17E-70 | 1.4 |
| DLEU2      | 1.05E-73 | 0.47300547   | 0.315 | 0.145 | 2.53E-69 | 1.4 |
| ARHGAP26   | 1.32E-73 | 0.565797916  | 0.371 | 0.184 | 3.19E-69 | 1.4 |
| CSF3R      | 1.59E-73 | 0.264817273  | 0.094 | 0.014 | 3.84E-69 | 1.4 |
| SYNM       | 2.10E-73 | 0.587194632  | 0.275 | 0.117 | 5.07E-69 | 1.4 |
| GANC       | 8.08E-73 | 0.402588408  | 0.202 | 0.07  | 1.95E-68 | 1.4 |
| PGK1       | 4.27E-72 | -0.686293986 | 0.556 | 0.686 | 1.03E-67 | 1.4 |
| SPG11      | 4.99E-72 | 0.49172189   | 0.433 | 0.234 | 1.20E-67 | 1.4 |
| WWOX       | 9.92E-72 | 0.763014785  | 0.352 | 0.179 | 2.39E-67 | 1.4 |
| SLC30A4    | 2.00E-71 | 0.42820092   | 0.237 | 0.092 | 4.83E-67 | 1.4 |
| RUNX1      | 2.32E-71 | 0.555422917  | 0.718 | 0.509 | 5.59E-67 | 1.4 |
| SGCZ       | 2.37E-71 | 0.612846557  | 0.173 | 0.054 | 5.71E-67 | 1.4 |
| ENPP6      | 4.21E-71 | 0.349308687  | 0.12  | 0.027 | 1.02E-66 | 1.4 |
| MYO6       | 7.16E-71 | -0.807218507 | 0.581 | 0.67  | 1.73E-66 | 1.4 |
| UCK2       | 8.85E-71 | 0.531369889  | 0.288 | 0.129 | 2.13E-66 | 1.4 |
| JPX        | 1.71E-70 | 0.501294299  | 0.395 | 0.211 | 4.12E-66 | 1.4 |
| GPHN       | 3.65E-70 | 0.433090672  | 0.442 | 0.24  | 8.80E-66 | 1.4 |
| CLU10S     | 7.60E-70 | 0.360191621  | 0.18  | 0.059 | 1.83E-65 | 1.4 |
| RP11-2900  | 2.81E-69 | 0.507290763  | 0.188 | 0.063 | 6.78E-65 | 1.4 |
| PRELID1    | 2.89E-69 | 0.402523588  | 0.25  | 0.103 | 6.97E-65 | 1.4 |
| TMEM165    | 5.03E-69 | 0.4685835    | 0.633 | 0.421 | 1.21E-64 | 1.4 |
| RNF213     | 7.40E-69 | 0.416913974  | 0.302 | 0.138 | 1.78E-64 | 1.4 |
| AKR1C3     | 1.23E-68 | 0.426305647  | 0.317 | 0.147 | 2.97E-64 | 1.4 |
| RPS6KA5    | 1.43E-68 | 0.496862552  | 0.335 | 0.165 | 3.45E-64 | 1.4 |
| RPL36AL    | 2.41E-68 | -0.411755318 | 0.9   | 0.919 | 5.82E-64 | 1.4 |
| AL109761.! | 2.66E-68 | 0.278058571  | 0.105 | 0.021 | 6.43E-64 | 1.4 |
| CYP1B1-AS  | 3.17E-68 | 0.288670647  | 0.098 | 0.018 | 7.63E-64 | 1.4 |
| ZNF33A     | 4.17E-68 | 0.422454105  | 0.385 | 0.201 | 1.01E-63 | 1.4 |
| ILF2       | 6.08E-68 | -0.696189738 | 0.464 | 0.596 | 1.47E-63 | 1.4 |
| ZNHIT6     | 6.59E-68 | 0.486566039  | 0.31  | 0.147 | 1.59E-63 | 1.4 |
| TGM2       | 8.18E-68 | 0.330966884  | 0.179 | 0.059 | 1.97E-63 | 1.4 |
| NEBL       | 2.81E-67 | 0.466508696  | 0.654 | 0.449 | 6.77E-63 | 1.4 |
| GUCY1A3    | 3.18E-67 | 0.539762167  | 0.358 | 0.185 | 7.66E-63 | 1.4 |
| UTRN       | 7.57E-67 | 0.531902598  | 0.342 | 0.171 | 1.83E-62 | 1.4 |
| ZFAS1      | 7.65E-67 | -0.388439071 | 0.952 | 0.966 | 1.85E-62 | 1.4 |

|            |          |              |       |       |          |     |
|------------|----------|--------------|-------|-------|----------|-----|
| C11orf80   | 8.63E-67 | 0.447200012  | 0.347 | 0.173 | 2.08E-62 | 1.4 |
| EFNA5      | 8.74E-67 | 0.506842633  | 0.653 | 0.442 | 2.11E-62 | 1.4 |
| HP         | 1.01E-66 | 0.83810209   | 0.08  | 0.011 | 2.44E-62 | 1.4 |
| SEMA6A     | 1.17E-66 | 0.525918941  | 0.565 | 0.361 | 2.81E-62 | 1.4 |
| IMMP2L     | 1.24E-66 | 0.556841993  | 0.457 | 0.267 | 2.99E-62 | 1.4 |
| TIAM1      | 1.99E-66 | -0.879998542 | 0.182 | 0.356 | 4.80E-62 | 1.4 |
| ELF5       | 2.39E-66 | 0.473756205  | 0.439 | 0.249 | 5.77E-62 | 1.4 |
| SLC24A3    | 2.55E-66 | 0.444120545  | 0.274 | 0.122 | 6.15E-62 | 1.4 |
| DHCR24     | 3.99E-66 | 0.417999371  | 0.283 | 0.129 | 9.62E-62 | 1.4 |
| RP11-475O  | 4.35E-66 | 0.380666994  | 0.12  | 0.028 | 1.05E-61 | 1.4 |
| DTNB       | 5.28E-66 | 0.453695045  | 0.731 | 0.525 | 1.27E-61 | 1.4 |
| BMPR1A     | 5.66E-66 | 0.453238598  | 0.426 | 0.235 | 1.37E-61 | 1.4 |
| UBE2H      | 7.68E-66 | -0.608905159 | 0.658 | 0.738 | 1.85E-61 | 1.4 |
| IDH2       | 1.93E-65 | 0.360614848  | 0.173 | 0.057 | 4.65E-61 | 1.4 |
| FOXN3      | 3.80E-65 | 0.4873066    | 0.361 | 0.188 | 9.16E-61 | 1.4 |
| C10orf10   | 4.13E-65 | 0.490626274  | 0.317 | 0.154 | 9.97E-61 | 1.4 |
| ST6GAL1    | 1.49E-64 | 0.502974805  | 0.481 | 0.286 | 3.60E-60 | 1.4 |
| RBM47      | 1.88E-64 | 0.445846111  | 0.732 | 0.54  | 4.52E-60 | 1.4 |
| DEFB1      | 2.43E-64 | 0.261634825  | 0.767 | 0.538 | 5.87E-60 | 1.4 |
| RP11-141O  | 2.99E-64 | 0.299809368  | 0.092 | 0.017 | 7.20E-60 | 1.4 |
| SPX        | 3.25E-64 | 0.311680792  | 0.107 | 0.023 | 7.82E-60 | 1.4 |
| ABCA5      | 5.88E-64 | 0.372898892  | 0.218 | 0.086 | 1.42E-59 | 1.4 |
| CRIM1      | 6.17E-64 | -0.696639534 | 0.385 | 0.544 | 1.49E-59 | 1.4 |
| PIWIL4     | 1.26E-63 | 0.322386571  | 0.135 | 0.037 | 3.03E-59 | 1.4 |
| DISC1      | 1.55E-63 | 0.387544847  | 0.192 | 0.07  | 3.74E-59 | 1.4 |
| FCHSD2     | 1.70E-63 | 0.401324263  | 0.199 | 0.074 | 4.09E-59 | 1.4 |
| MIR646HG   | 2.03E-63 | 0.417806403  | 0.183 | 0.065 | 4.88E-59 | 1.4 |
| C4orf3     | 3.66E-63 | -0.792590179 | 0.56  | 0.649 | 8.83E-59 | 1.4 |
| SLC20A2    | 5.80E-63 | -0.790276424 | 0.266 | 0.428 | 1.40E-58 | 1.4 |
| TRIM38     | 7.02E-63 | 0.378283843  | 0.195 | 0.073 | 1.69E-58 | 1.4 |
| ARF4       | 7.72E-63 | -0.589081708 | 0.572 | 0.681 | 1.86E-58 | 1.4 |
| LINC01184  | 1.35E-62 | 0.415892987  | 0.346 | 0.175 | 3.25E-58 | 1.4 |
| ATF7IP     | 1.59E-62 | 0.459863601  | 0.287 | 0.134 | 3.83E-58 | 1.4 |
| BOC        | 1.73E-62 | 0.300224682  | 0.096 | 0.019 | 4.16E-58 | 1.4 |
| MT-ND3     | 3.95E-62 | 0.319960064  | 0.986 | 0.983 | 9.54E-58 | 1.4 |
| RASAL2     | 5.55E-62 | -0.834623201 | 0.442 | 0.577 | 1.34E-57 | 1.4 |
| TSC22D1    | 6.04E-62 | 0.561053743  | 0.382 | 0.212 | 1.46E-57 | 1.4 |
| C21orf91-C | 6.57E-62 | 0.283668033  | 0.097 | 0.019 | 1.58E-57 | 1.4 |
| EYA2       | 9.28E-62 | 0.468452638  | 0.324 | 0.162 | 2.24E-57 | 1.4 |
| NSD1       | 1.24E-61 | 0.413490852  | 0.251 | 0.111 | 3.00E-57 | 1.4 |
| ITGB1      | 1.84E-61 | -0.749772243 | 0.238 | 0.399 | 4.43E-57 | 1.4 |
| HGSNAT     | 2.04E-61 | 0.435086939  | 0.277 | 0.129 | 4.93E-57 | 1.4 |
| PDXK       | 2.15E-61 | 0.416469601  | 0.269 | 0.123 | 5.18E-57 | 1.4 |
| CCL4       | 2.38E-61 | 1.890387692  | 0.168 | 0.059 | 5.74E-57 | 1.4 |
| NPM1       | 3.06E-61 | -0.426516858 | 0.893 | 0.918 | 7.38E-57 | 1.4 |
| SFRP1      | 3.96E-61 | 0.469752456  | 0.609 | 0.408 | 9.55E-57 | 1.4 |
| R3HDM2     | 6.00E-61 | 0.427988118  | 0.258 | 0.116 | 1.45E-56 | 1.4 |

|           |          |              |       |       |          |     |
|-----------|----------|--------------|-------|-------|----------|-----|
| SCGB2B2   | 6.76E-61 | 0.280815165  | 0.129 | 0.035 | 1.63E-56 | 1.4 |
| LINC01122 | 7.87E-61 | 0.413163678  | 0.138 | 0.04  | 1.90E-56 | 1.4 |
| MAML3     | 8.94E-61 | 0.454458709  | 0.369 | 0.197 | 2.16E-56 | 1.4 |
| ST8SIA1   | 1.48E-60 | 0.406950169  | 0.294 | 0.142 | 3.57E-56 | 1.4 |
| PKP4      | 1.79E-60 | 0.479615053  | 0.583 | 0.388 | 4.31E-56 | 1.4 |
| WFDC2     | 3.48E-60 | 0.317261944  | 0.662 | 0.442 | 8.39E-56 | 1.4 |
| LRP1B     | 4.55E-60 | 0.611306395  | 0.321 | 0.164 | 1.10E-55 | 1.4 |
| NPAS3     | 7.00E-60 | 0.493693085  | 0.268 | 0.125 | 1.69E-55 | 1.4 |
| CX3CL1    | 1.56E-59 | 0.513898604  | 0.394 | 0.221 | 3.76E-55 | 1.4 |
| FKBP5     | 4.23E-59 | 0.53675326   | 0.413 | 0.236 | 1.02E-54 | 1.4 |
| TRIM56    | 4.39E-59 | 0.434835378  | 0.32  | 0.162 | 1.06E-54 | 1.4 |
| ARHGAP29  | 4.64E-59 | -1.033296066 | 0.379 | 0.519 | 1.12E-54 | 1.4 |
| LRBA      | 5.78E-59 | 0.402396904  | 0.619 | 0.406 | 1.39E-54 | 1.4 |
| TMCO4     | 7.85E-59 | 0.338501602  | 0.184 | 0.068 | 1.89E-54 | 1.4 |
| BTG1      | 8.44E-59 | 0.505740863  | 0.606 | 0.42  | 2.03E-54 | 1.4 |
| HNRNPA1   | 1.08E-58 | -0.501742559 | 0.879 | 0.9   | 2.60E-54 | 1.4 |
| MAML2     | 1.12E-58 | 0.414871387  | 0.889 | 0.742 | 2.70E-54 | 1.4 |
| CYP27A1   | 2.05E-58 | 0.333914467  | 0.162 | 0.055 | 4.93E-54 | 1.4 |
| PDCD4     | 2.25E-58 | 0.507636876  | 0.341 | 0.183 | 5.42E-54 | 1.4 |
| MT-ATP6   | 2.42E-58 | 0.291573284  | 0.987 | 0.987 | 5.84E-54 | 1.4 |
| VNN1      | 2.57E-58 | 0.395477411  | 0.389 | 0.212 | 6.20E-54 | 1.4 |
| MICAL2    | 2.79E-58 | 0.354828128  | 0.135 | 0.04  | 6.73E-54 | 1.4 |
| MORF4L2   | 3.50E-58 | -0.505428593 | 0.698 | 0.763 | 8.43E-54 | 1.4 |
| HRSP12    | 4.91E-58 | 0.340654159  | 0.169 | 0.06  | 1.18E-53 | 1.4 |
| IFI16     | 6.39E-58 | 0.445120755  | 0.404 | 0.231 | 1.54E-53 | 1.4 |
| NNMT      | 7.17E-58 | 0.414178313  | 0.162 | 0.055 | 1.73E-53 | 1.4 |
| ATL2      | 9.92E-58 | 0.451393558  | 0.414 | 0.238 | 2.39E-53 | 1.4 |
| HSD17B2   | 1.30E-57 | 0.31548656   | 0.137 | 0.041 | 3.13E-53 | 1.4 |
| INTS10    | 1.55E-57 | 0.343800075  | 0.201 | 0.08  | 3.74E-53 | 1.4 |
| RP11-536O | 2.21E-57 | 0.405522564  | 0.21  | 0.086 | 5.32E-53 | 1.4 |
| ARHGAP44  | 2.27E-57 | 0.383960867  | 0.369 | 0.198 | 5.48E-53 | 1.4 |
| PCCA      | 3.69E-57 | 0.395342072  | 0.264 | 0.123 | 8.89E-53 | 1.4 |
| PRKCE     | 4.11E-57 | 0.494202942  | 0.32  | 0.165 | 9.91E-53 | 1.4 |
| UVRAG     | 4.66E-57 | 0.430408531  | 0.563 | 0.365 | 1.12E-52 | 1.4 |
| NHS       | 5.87E-57 | 0.416767081  | 0.302 | 0.15  | 1.42E-52 | 1.4 |
| YWHAZ     | 2.60E-56 | -0.567682352 | 0.514 | 0.615 | 6.27E-52 | 1.4 |
| RSRP1     | 3.22E-56 | 0.416067618  | 0.374 | 0.206 | 7.75E-52 | 1.4 |
| VPS13D    | 3.22E-56 | 0.386911537  | 0.463 | 0.277 | 7.76E-52 | 1.4 |
| KRIT1     | 3.71E-56 | 0.334198492  | 0.214 | 0.09  | 8.96E-52 | 1.4 |
| JAK2      | 4.62E-56 | 0.490563495  | 0.159 | 0.056 | 1.11E-51 | 1.4 |
| CDKAL1    | 5.11E-56 | 0.433928021  | 0.368 | 0.202 | 1.23E-51 | 1.4 |
| IRF2BPL   | 7.50E-56 | 0.35947454   | 0.222 | 0.095 | 1.81E-51 | 1.4 |
| ASS1      | 8.02E-56 | 0.387487333  | 0.262 | 0.124 | 1.93E-51 | 1.4 |
| HSD17B7   | 8.40E-56 | 0.384393902  | 0.205 | 0.084 | 2.03E-51 | 1.4 |
| KIAA0319L | 9.44E-56 | 0.384514289  | 0.269 | 0.127 | 2.28E-51 | 1.4 |
| PTPRG     | 1.30E-55 | 0.429479118  | 0.35  | 0.186 | 3.12E-51 | 1.4 |
| SKAP2     | 1.78E-55 | 0.391322003  | 0.459 | 0.276 | 4.30E-51 | 1.4 |



|           |          |              |       |       |          |     |
|-----------|----------|--------------|-------|-------|----------|-----|
| NEAT1     | 2.22E-55 | 0.299841435  | 0.994 | 0.954 | 5.36E-51 | 1.4 |
| PHLDA1    | 4.13E-55 | 0.41089177   | 0.277 | 0.135 | 9.97E-51 | 1.4 |
| MGC32805  | 7.41E-55 | 0.19434683   | 0.063 | 0.008 | 1.79E-50 | 1.4 |
| DAPK2     | 8.49E-55 | -0.699827352 | 0.337 | 0.484 | 2.05E-50 | 1.4 |
| PTPRK     | 1.08E-54 | 0.383028576  | 0.839 | 0.673 | 2.60E-50 | 1.4 |
| EDN1      | 1.19E-54 | -0.703420742 | 0.105 | 0.25  | 2.88E-50 | 1.4 |
| LINC01482 | 1.42E-54 | 0.280457098  | 0.076 | 0.013 | 3.42E-50 | 1.4 |
| ATR       | 1.55E-54 | 0.395431235  | 0.272 | 0.132 | 3.74E-50 | 1.4 |
| IDO1      | 1.97E-54 | 0.565392067  | 0.091 | 0.02  | 4.74E-50 | 1.4 |
| BPTF      | 2.41E-54 | 0.424554573  | 0.465 | 0.289 | 5.82E-50 | 1.4 |
| BBOX1     | 3.84E-54 | 0.514424275  | 0.389 | 0.221 | 9.25E-50 | 1.4 |
| NPEPPS    | 4.54E-54 | -0.746065233 | 0.354 | 0.488 | 1.09E-49 | 1.4 |
| WDPCP     | 4.96E-54 | 0.410512523  | 0.249 | 0.116 | 1.19E-49 | 1.4 |
| FAM157C   | 6.53E-54 | 0.359724409  | 0.257 | 0.12  | 1.57E-49 | 1.4 |
| CEPT1     | 7.64E-54 | 0.38633213   | 0.413 | 0.241 | 1.84E-49 | 1.4 |
| RNF150    | 1.08E-53 | 0.441780125  | 0.232 | 0.103 | 2.59E-49 | 1.4 |
| INSIG2    | 1.10E-53 | -0.641679949 | 0.129 | 0.274 | 2.65E-49 | 1.4 |
| PTPRM     | 1.17E-53 | 0.605267652  | 0.275 | 0.138 | 2.83E-49 | 1.4 |
| MAP2K5    | 1.67E-53 | 0.380049307  | 0.218 | 0.095 | 4.03E-49 | 1.4 |
| DAAM1     | 1.69E-53 | -0.732334792 | 0.42  | 0.549 | 4.08E-49 | 1.4 |
| NFE2L2    | 1.69E-53 | 0.451452306  | 0.486 | 0.311 | 4.08E-49 | 1.4 |
| RNF130    | 1.80E-53 | 0.354238198  | 0.264 | 0.126 | 4.35E-49 | 1.4 |
| MYOF      | 1.93E-53 | -0.629769149 | 0.423 | 0.553 | 4.64E-49 | 1.4 |
| ABI1      | 3.64E-53 | -0.602838157 | 0.679 | 0.745 | 8.77E-49 | 1.4 |
| MACC1     | 4.58E-53 | -0.796523119 | 0.293 | 0.443 | 1.10E-48 | 1.4 |
| STX17     | 4.71E-53 | 0.307880183  | 0.239 | 0.109 | 1.13E-48 | 1.4 |
| EIF4A2    | 5.85E-53 | -0.480869576 | 0.783 | 0.824 | 1.41E-48 | 1.4 |
| TLR5      | 8.91E-53 | 0.245202227  | 0.11  | 0.029 | 2.15E-48 | 1.4 |
| COA1      | 1.18E-52 | 0.378403894  | 0.395 | 0.23  | 2.84E-48 | 1.4 |
| ZNF429    | 1.35E-52 | 0.308256384  | 0.155 | 0.055 | 3.27E-48 | 1.4 |
| DTNA      | 1.65E-52 | -0.78171786  | 0.674 | 0.738 | 3.97E-48 | 1.4 |
| TES       | 1.81E-52 | -0.617407961 | 0.211 | 0.361 | 4.36E-48 | 1.4 |
| PLEKHA5   | 1.98E-52 | 0.383323817  | 0.56  | 0.371 | 4.76E-48 | 1.4 |
| RAD23B    | 2.29E-52 | -0.68529675  | 0.316 | 0.456 | 5.52E-48 | 1.4 |
| ZNF608    | 2.34E-52 | 0.405870754  | 0.267 | 0.13  | 5.65E-48 | 1.4 |
| KCNJ2     | 2.68E-52 | 0.187109136  | 0.065 | 0.009 | 6.46E-48 | 1.4 |
| RP1-28O10 | 3.04E-52 | 0.272941211  | 0.132 | 0.042 | 7.33E-48 | 1.4 |
| SGPP2     | 5.23E-52 | 0.413045995  | 0.299 | 0.154 | 1.26E-47 | 1.4 |
| ZKSCAN1   | 5.75E-52 | 0.391103845  | 0.388 | 0.221 | 1.39E-47 | 1.4 |
| MTUS1     | 5.84E-52 | -0.701852393 | 0.261 | 0.409 | 1.41E-47 | 1.4 |
| SVIL      | 7.42E-52 | 0.401365684  | 0.909 | 0.808 | 1.79E-47 | 1.4 |
| DPYSL2    | 1.25E-51 | 0.373555371  | 0.215 | 0.095 | 3.02E-47 | 1.4 |
| GPRC5A    | 1.92E-51 | -0.995126031 | 0.247 | 0.383 | 4.63E-47 | 1.4 |
| BBX       | 3.01E-51 | 0.384504687  | 0.527 | 0.344 | 7.25E-47 | 1.4 |
| CCDC14    | 5.98E-51 | 0.326649144  | 0.236 | 0.109 | 1.44E-46 | 1.4 |
| ARPP19    | 8.05E-51 | -0.595981489 | 0.225 | 0.372 | 1.94E-46 | 1.4 |
| FLNB      | 1.13E-50 | -0.728598971 | 0.276 | 0.416 | 2.72E-46 | 1.4 |

|           |          |              |       |       |          |     |
|-----------|----------|--------------|-------|-------|----------|-----|
| ANXA3     | 1.18E-50 | -0.652037615 | 0.307 | 0.451 | 2.86E-46 | 1.4 |
| CCL5      | 1.23E-50 | 0.271783622  | 0.067 | 0.011 | 2.96E-46 | 1.4 |
| CATSPERB  | 2.25E-50 | 0.358089467  | 0.366 | 0.204 | 5.42E-46 | 1.4 |
| SUMF1     | 2.82E-50 | 0.390947177  | 0.2   | 0.086 | 6.80E-46 | 1.4 |
| IFNGR1    | 3.49E-50 | 0.418968773  | 0.374 | 0.216 | 8.41E-46 | 1.4 |
| GBP3      | 3.51E-50 | 0.36406837   | 0.258 | 0.126 | 8.47E-46 | 1.4 |
| RP11-115D | 3.76E-50 | 0.272705692  | 0.077 | 0.015 | 9.07E-46 | 1.4 |
| GRHL2     | 6.04E-50 | 0.360418778  | 0.395 | 0.233 | 1.46E-45 | 1.4 |
| VCAM1     | 7.75E-50 | 0.227927743  | 0.053 | 0.006 | 1.87E-45 | 1.4 |
| KLHL5     | 8.21E-50 | 0.370192136  | 0.279 | 0.142 | 1.98E-45 | 1.4 |
| NAA25     | 1.19E-49 | -0.67350762  | 0.211 | 0.356 | 2.87E-45 | 1.4 |
| DOCK7     | 1.21E-49 | 0.430876634  | 0.358 | 0.203 | 2.91E-45 | 1.4 |
| MCC       | 1.50E-49 | 0.34476593   | 0.197 | 0.084 | 3.62E-45 | 1.4 |
| UGGT2     | 2.00E-49 | 0.475860618  | 0.271 | 0.137 | 4.81E-45 | 1.4 |
| CAPN2     | 3.33E-49 | -0.583637043 | 0.19  | 0.335 | 8.03E-45 | 1.4 |
| LINC00536 | 4.57E-49 | 0.346861271  | 0.149 | 0.054 | 1.10E-44 | 1.4 |
| ACTN1     | 6.93E-49 | -0.68890009  | 0.167 | 0.314 | 1.67E-44 | 1.4 |
| RP11-37B2 | 8.87E-49 | 0.381727528  | 0.418 | 0.248 | 2.14E-44 | 1.4 |
| FGFR1     | 2.27E-48 | -0.695758283 | 0.074 | 0.2   | 5.47E-44 | 1.4 |
| MICAL3    | 2.81E-48 | -0.702770879 | 0.197 | 0.339 | 6.78E-44 | 1.4 |
| SMIM14    | 3.78E-48 | 0.349531987  | 0.251 | 0.123 | 9.12E-44 | 1.4 |
| PHLPP1    | 3.79E-48 | -0.756468081 | 0.366 | 0.493 | 9.13E-44 | 1.4 |
| CTC-340D7 | 3.96E-48 | 0.207065364  | 0.071 | 0.013 | 9.55E-44 | 1.4 |
| UBE2E3    | 6.69E-48 | 0.395806029  | 0.273 | 0.141 | 1.61E-43 | 1.4 |
| SOS1      | 7.70E-48 | 0.399410949  | 0.516 | 0.335 | 1.86E-43 | 1.4 |
| FTH1      | 9.15E-48 | 0.313137259  | 0.939 | 0.851 | 2.21E-43 | 1.4 |
| RANBP17   | 1.12E-47 | 0.351178313  | 0.275 | 0.14  | 2.70E-43 | 1.4 |
| SULF2     | 1.17E-47 | 0.326992824  | 0.179 | 0.073 | 2.83E-43 | 1.4 |
| USP39     | 2.51E-47 | 0.331400035  | 0.484 | 0.306 | 6.05E-43 | 1.4 |
| 5-Mar     | 3.22E-47 | -0.634271624 | 0.133 | 0.269 | 7.76E-43 | 1.4 |
| FGGY      | 9.85E-47 | 0.388623962  | 0.339 | 0.193 | 2.38E-42 | 1.4 |
| C4BPA     | 1.07E-46 | 0.282110546  | 0.098 | 0.027 | 2.57E-42 | 1.4 |
| FAM20C    | 1.51E-46 | 0.39015473   | 0.178 | 0.074 | 3.64E-42 | 1.4 |
| IGFBP7    | 1.52E-46 | 0.278912054  | 0.063 | 0.011 | 3.66E-42 | 1.4 |
| CPD       | 1.76E-46 | 0.427683334  | 0.326 | 0.183 | 4.25E-42 | 1.4 |
| KCNQ3     | 2.71E-46 | 0.367437324  | 0.112 | 0.034 | 6.53E-42 | 1.4 |
| CH17-189H | 2.71E-46 | 0.354192451  | 0.216 | 0.101 | 6.53E-42 | 1.4 |
| DANT2     | 3.01E-46 | 0.29942555   | 0.155 | 0.059 | 7.25E-42 | 1.4 |
| SRRM1     | 3.03E-46 | -0.538674704 | 0.612 | 0.675 | 7.31E-42 | 1.4 |
| ZC3H12C   | 3.03E-46 | 0.397153979  | 0.322 | 0.179 | 7.31E-42 | 1.4 |
| YWHAH     | 4.30E-46 | -0.531089708 | 0.121 | 0.253 | 1.04E-41 | 1.4 |
| SLPI      | 4.32E-46 | 0.683956561  | 0.879 | 0.791 | 1.04E-41 | 1.4 |
| MARK1     | 8.11E-46 | 0.286743365  | 0.157 | 0.06  | 1.95E-41 | 1.4 |
| MINA      | 8.17E-46 | 0.261085732  | 0.143 | 0.053 | 1.97E-41 | 1.4 |
| CATSPER2  | 1.07E-45 | 0.277770836  | 0.158 | 0.062 | 2.58E-41 | 1.4 |
| EVL       | 1.67E-45 | 0.283321353  | 0.121 | 0.04  | 4.02E-41 | 1.4 |
| SPDYE2    | 1.81E-45 | 0.320003178  | 0.29  | 0.155 | 4.37E-41 | 1.4 |

|           |          |              |       |       |          |     |
|-----------|----------|--------------|-------|-------|----------|-----|
| TBCK      | 1.83E-45 | 0.345211361  | 0.209 | 0.096 | 4.42E-41 | 1.4 |
| SGMS2     | 2.22E-45 | -0.541848982 | 0.085 | 0.211 | 5.35E-41 | 1.4 |
| RP11-318C | 2.36E-45 | 0.225735013  | 0.099 | 0.028 | 5.70E-41 | 1.4 |
| ZNF638    | 2.44E-45 | 0.342025357  | 0.555 | 0.377 | 5.88E-41 | 1.4 |
| TNFAIP8   | 2.65E-45 | 0.43136599   | 0.533 | 0.357 | 6.40E-41 | 1.4 |
| FAF1      | 3.15E-45 | 0.376220621  | 0.384 | 0.23  | 7.59E-41 | 1.4 |
| CMPK1     | 3.77E-45 | 0.344217057  | 0.442 | 0.275 | 9.10E-41 | 1.4 |
| TANC2     | 4.55E-45 | -0.641259774 | 0.19  | 0.326 | 1.10E-40 | 1.4 |
| LAP3      | 4.75E-45 | 0.389451422  | 0.274 | 0.145 | 1.15E-40 | 1.4 |
| NEDD4L    | 5.66E-45 | -0.609368448 | 0.47  | 0.575 | 1.37E-40 | 1.4 |
| CNKSR3    | 5.98E-45 | 0.47403477   | 0.642 | 0.468 | 1.44E-40 | 1.4 |
| HELB      | 6.19E-45 | 0.336516418  | 0.203 | 0.093 | 1.49E-40 | 1.4 |
| NFIA      | 6.38E-45 | 0.369680067  | 0.212 | 0.099 | 1.54E-40 | 1.4 |
| SNX10     | 7.15E-45 | 0.237636797  | 0.109 | 0.034 | 1.72E-40 | 1.4 |
| IKBKE     | 8.34E-45 | 0.234224821  | 0.091 | 0.024 | 2.01E-40 | 1.4 |
| BAZ2B     | 9.79E-45 | 0.343770259  | 0.571 | 0.395 | 2.36E-40 | 1.4 |
| ABHD17C   | 1.06E-44 | 0.291428828  | 0.125 | 0.043 | 2.56E-40 | 1.4 |
| GLCCI1    | 1.22E-44 | 0.290798372  | 0.15  | 0.058 | 2.95E-40 | 1.4 |
| LINC-PINT | 1.68E-44 | 0.404378431  | 0.678 | 0.498 | 4.05E-40 | 1.4 |
| ZMYND8    | 1.71E-44 | 0.34322513   | 0.373 | 0.221 | 4.12E-40 | 1.4 |
| PLSCR1    | 1.76E-44 | 0.35448506   | 0.408 | 0.249 | 4.25E-40 | 1.4 |
| KCNQ1     | 1.78E-44 | 0.308580449  | 0.17  | 0.07  | 4.30E-40 | 1.4 |
| ANO10     | 2.44E-44 | 0.325476186  | 0.345 | 0.196 | 5.88E-40 | 1.4 |
| C5orf46   | 2.46E-44 | -0.582772566 | 0.132 | 0.265 | 5.93E-40 | 1.4 |
| RERE      | 2.57E-44 | 0.332380904  | 0.566 | 0.383 | 6.19E-40 | 1.4 |
| ENAH      | 4.69E-44 | -0.702704091 | 0.407 | 0.516 | 1.13E-39 | 1.4 |
| METTL15   | 4.73E-44 | 0.320131611  | 0.216 | 0.102 | 1.14E-39 | 1.4 |
| SPPL3     | 5.10E-44 | 0.353080718  | 0.361 | 0.212 | 1.23E-39 | 1.4 |
| CDC25B    | 5.76E-44 | 0.257804533  | 0.078 | 0.018 | 1.39E-39 | 1.4 |
| MIR4435-2 | 5.92E-44 | -0.68454834  | 0.397 | 0.516 | 1.43E-39 | 1.4 |
| GABRG3    | 7.13E-44 | 0.280098874  | 0.087 | 0.023 | 1.72E-39 | 1.4 |
| C1QTNF1   | 8.49E-44 | 0.246475016  | 0.097 | 0.027 | 2.05E-39 | 1.4 |
| CTSV      | 9.66E-44 | -0.885344304 | 0.123 | 0.255 | 2.33E-39 | 1.4 |
| LIFR      | 1.85E-43 | 0.379221143  | 0.19  | 0.085 | 4.47E-39 | 1.4 |
| SRD5A3    | 1.86E-43 | 0.23259651   | 0.112 | 0.036 | 4.49E-39 | 1.4 |
| ATM       | 1.93E-43 | 0.281273095  | 0.137 | 0.051 | 4.66E-39 | 1.4 |
| SNCAIP    | 2.39E-43 | 0.256257391  | 0.07  | 0.014 | 5.76E-39 | 1.4 |
| CNDP2     | 2.44E-43 | 0.29398141   | 0.177 | 0.076 | 5.89E-39 | 1.4 |
| AC027119. | 2.88E-43 | 0.169070773  | 0.052 | 0.007 | 6.94E-39 | 1.4 |
| IGF2BP2   | 3.29E-43 | -0.680907133 | 0.431 | 0.539 | 7.94E-39 | 1.4 |
| H1FO      | 3.62E-43 | 0.354412956  | 0.264 | 0.139 | 8.73E-39 | 1.4 |
| SLC26A4   | 5.60E-43 | 0.322559073  | 0.058 | 0.01  | 1.35E-38 | 1.4 |
| PARP14    | 8.57E-43 | 0.338426689  | 0.244 | 0.124 | 2.07E-38 | 1.4 |
| CTB-113D1 | 9.32E-43 | 0.1459188    | 0.043 | 0.004 | 2.25E-38 | 1.4 |
| AKR1C1    | 1.02E-42 | 0.451217613  | 0.203 | 0.095 | 2.47E-38 | 1.4 |
| NRG2      | 2.11E-42 | 0.286959487  | 0.117 | 0.039 | 5.09E-38 | 1.4 |
| MAP3K13   | 2.21E-42 | 0.261728186  | 0.916 | 0.798 | 5.32E-38 | 1.4 |

|           |          |              |       |       |          |     |
|-----------|----------|--------------|-------|-------|----------|-----|
| SDCCAG8   | 2.36E-42 | 0.371932257  | 0.279 | 0.15  | 5.68E-38 | 1.4 |
| FRY       | 2.41E-42 | 0.23669099   | 0.088 | 0.024 | 5.80E-38 | 1.4 |
| RP11-142M | 2.50E-42 | 0.210651206  | 0.065 | 0.013 | 6.02E-38 | 1.4 |
| PPP2R2A   | 3.39E-42 | -0.584790425 | 0.318 | 0.443 | 8.16E-38 | 1.4 |
| TPCN1     | 4.00E-42 | 0.311572038  | 0.199 | 0.093 | 9.66E-38 | 1.4 |
| HOOK2     | 4.49E-42 | 0.340422063  | 0.254 | 0.132 | 1.08E-37 | 1.4 |
| PARD3B    | 7.36E-42 | 0.352285235  | 0.213 | 0.103 | 1.77E-37 | 1.4 |
| EIF4E     | 8.27E-42 | -0.565643354 | 0.291 | 0.418 | 1.99E-37 | 1.4 |
| EZR       | 1.06E-41 | -0.603063973 | 0.212 | 0.346 | 2.55E-37 | 1.4 |
| SOX10     | 1.13E-41 | 0.374935594  | 0.208 | 0.1   | 2.72E-37 | 1.4 |
| KRT7      | 1.31E-41 | -0.579671257 | 0.178 | 0.312 | 3.16E-37 | 1.4 |
| MAPK14    | 1.32E-41 | 0.344074994  | 0.27  | 0.146 | 3.18E-37 | 1.4 |
| PLD1      | 1.68E-41 | 0.314903646  | 0.169 | 0.073 | 4.04E-37 | 1.4 |
| DTWD1     | 2.31E-41 | 0.258045787  | 0.13  | 0.048 | 5.57E-37 | 1.4 |
| VPS13C    | 2.89E-41 | 0.325138946  | 0.321 | 0.184 | 6.97E-37 | 1.4 |
| GABPB1-AS | 3.59E-41 | 0.304776073  | 0.301 | 0.168 | 8.65E-37 | 1.4 |
| RALGAPA2  | 3.68E-41 | 0.380672675  | 0.284 | 0.157 | 8.87E-37 | 1.4 |
| MYCBP2    | 4.20E-41 | 0.320362589  | 0.264 | 0.14  | 1.01E-36 | 1.4 |
| PPM1L     | 4.63E-41 | 0.298144251  | 0.136 | 0.052 | 1.12E-36 | 1.4 |
| CTSB      | 4.64E-41 | 0.32197208   | 0.419 | 0.263 | 1.12E-36 | 1.4 |
| ENTPD1-AS | 5.97E-41 | 0.268188822  | 0.131 | 0.049 | 1.44E-36 | 1.4 |
| CSF1      | 7.88E-41 | 0.347923995  | 0.157 | 0.065 | 1.90E-36 | 1.4 |
| CYP27B1   | 8.65E-41 | 0.22722434   | 0.091 | 0.026 | 2.09E-36 | 1.4 |
| CCDC125   | 9.05E-41 | 0.259498477  | 0.126 | 0.046 | 2.18E-36 | 1.4 |
| WIPI1     | 9.41E-41 | 0.316608394  | 0.257 | 0.136 | 2.27E-36 | 1.4 |
| S100A14   | 9.74E-41 | -0.626671707 | 0.612 | 0.686 | 2.35E-36 | 1.4 |
| TIMM23B   | 1.10E-40 | 0.340598775  | 0.302 | 0.171 | 2.66E-36 | 1.4 |
| LINC00998 | 1.33E-40 | 0.291101359  | 0.26  | 0.137 | 3.20E-36 | 1.4 |
| HDAC8     | 1.43E-40 | 0.348955678  | 0.327 | 0.192 | 3.44E-36 | 1.4 |
| SLC27A4   | 1.78E-40 | -0.699317887 | 0.475 | 0.595 | 4.28E-36 | 1.4 |
| LRRC37A3  | 1.97E-40 | 0.269026154  | 0.201 | 0.095 | 4.74E-36 | 1.4 |
| TRIM22    | 2.00E-40 | 0.278557481  | 0.181 | 0.082 | 4.83E-36 | 1.4 |
| SHPRH     | 2.53E-40 | 0.286008351  | 0.177 | 0.079 | 6.11E-36 | 1.4 |
| TMBIM6    | 2.66E-40 | -0.41721865  | 0.772 | 0.809 | 6.42E-36 | 1.4 |
| RSRC2     | 2.76E-40 | -0.562460552 | 0.547 | 0.624 | 6.64E-36 | 1.4 |
| CAST      | 3.55E-40 | -0.562286016 | 0.482 | 0.566 | 8.56E-36 | 1.4 |
| FMO2      | 4.36E-40 | 0.364444686  | 0.192 | 0.09  | 1.05E-35 | 1.4 |
| CCAR1     | 4.57E-40 | 0.309995739  | 0.361 | 0.219 | 1.10E-35 | 1.4 |
| VPS13B    | 5.20E-40 | 0.301759885  | 0.255 | 0.134 | 1.25E-35 | 1.4 |
| TTC28     | 7.82E-40 | 0.338413631  | 0.162 | 0.07  | 1.89E-35 | 1.4 |
| C4BPB     | 9.62E-40 | 0.212912505  | 0.095 | 0.029 | 2.32E-35 | 1.4 |
| ZC3H6     | 9.66E-40 | 0.248523825  | 0.129 | 0.049 | 2.33E-35 | 1.4 |
| PKD2      | 1.05E-39 | 0.280975567  | 0.151 | 0.062 | 2.53E-35 | 1.4 |
| ZNF124    | 1.10E-39 | 0.284534189  | 0.155 | 0.066 | 2.65E-35 | 1.4 |
| HIBADH    | 1.13E-39 | 0.318853613  | 0.287 | 0.159 | 2.72E-35 | 1.4 |
| CTSS      | 1.16E-39 | 0.356501878  | 0.37  | 0.227 | 2.80E-35 | 1.4 |
| USP40     | 1.59E-39 | 0.246439147  | 0.129 | 0.049 | 3.84E-35 | 1.4 |

|           |          |              |       |       |          |     |
|-----------|----------|--------------|-------|-------|----------|-----|
| CDK13     | 1.65E-39 | 0.335763284  | 0.465 | 0.309 | 3.98E-35 | 1.4 |
| TCF12     | 2.11E-39 | 0.360605896  | 0.624 | 0.453 | 5.09E-35 | 1.4 |
| AK3       | 2.14E-39 | 0.273985681  | 0.212 | 0.105 | 5.15E-35 | 1.4 |
| TTC39C    | 2.50E-39 | 0.34832194   | 0.214 | 0.106 | 6.03E-35 | 1.4 |
| DIMT1     | 2.58E-39 | 0.228941349  | 0.125 | 0.046 | 6.21E-35 | 1.4 |
| NEO1      | 3.28E-39 | 0.287087186  | 0.15  | 0.062 | 7.91E-35 | 1.4 |
| FAM135A   | 3.46E-39 | 0.292883893  | 0.147 | 0.06  | 8.33E-35 | 1.4 |
| MOB4      | 3.49E-39 | 0.300878966  | 0.292 | 0.164 | 8.41E-35 | 1.4 |
| SIPA1L1   | 4.96E-39 | 0.324276467  | 0.476 | 0.314 | 1.20E-34 | 1.4 |
| CCT2      | 7.83E-39 | -0.531549123 | 0.32  | 0.438 | 1.89E-34 | 1.4 |
| GPATCH8   | 8.10E-39 | 0.334328437  | 0.36  | 0.22  | 1.95E-34 | 1.4 |
| CLEC1A    | 1.11E-38 | 0.158481745  | 0.066 | 0.015 | 2.67E-34 | 1.4 |
| NBEA      | 1.31E-38 | 0.359129475  | 0.182 | 0.085 | 3.16E-34 | 1.4 |
| ZNF280D   | 1.38E-38 | 0.27095519   | 0.174 | 0.078 | 3.32E-34 | 1.4 |
| NMI       | 1.58E-38 | 0.270276245  | 0.201 | 0.097 | 3.81E-34 | 1.4 |
| CD47      | 1.87E-38 | 0.355860664  | 0.561 | 0.393 | 4.50E-34 | 1.4 |
| TNFRSF1B  | 2.04E-38 | 0.22791023   | 0.135 | 0.053 | 4.92E-34 | 1.4 |
| CARF      | 2.05E-38 | 0.200885282  | 0.074 | 0.019 | 4.95E-34 | 1.4 |
| CHD2      | 2.49E-38 | -0.599393442 | 0.345 | 0.462 | 6.00E-34 | 1.4 |
| ARHGEF3   | 2.86E-38 | 0.335730993  | 0.421 | 0.271 | 6.89E-34 | 1.4 |
| MAGED1    | 3.09E-38 | 0.27228542   | 0.181 | 0.083 | 7.44E-34 | 1.4 |
| RP11-66B2 | 3.15E-38 | 0.269867413  | 0.171 | 0.077 | 7.60E-34 | 1.4 |
| CCL20     | 3.30E-38 | 0.264219633  | 0.409 | 0.265 | 7.96E-34 | 1.4 |
| BMPR2     | 3.37E-38 | 0.333688628  | 0.334 | 0.199 | 8.12E-34 | 1.4 |
| FDPS      | 3.68E-38 | 0.333216609  | 0.582 | 0.419 | 8.86E-34 | 1.4 |
| CCDC146   | 4.08E-38 | 0.355003802  | 0.277 | 0.154 | 9.83E-34 | 1.4 |
| SCMH1     | 4.19E-38 | 0.309701672  | 0.314 | 0.182 | 1.01E-33 | 1.4 |
| DBI       | 7.11E-38 | 0.324615242  | 0.799 | 0.657 | 1.71E-33 | 1.4 |
| PARP8     | 8.17E-38 | 0.310853775  | 0.201 | 0.098 | 1.97E-33 | 1.4 |
| RPRD2     | 8.80E-38 | 0.310590168  | 0.232 | 0.121 | 2.12E-33 | 1.4 |
| LINC01183 | 8.90E-38 | 0.257034276  | 0.114 | 0.041 | 2.15E-33 | 1.4 |
| TRAPPC9   | 8.96E-38 | 0.304288355  | 0.268 | 0.146 | 2.16E-33 | 1.4 |
| ZNF195    | 9.34E-38 | 0.29453306   | 0.187 | 0.088 | 2.25E-33 | 1.4 |
| MKL2      | 9.65E-38 | 0.350803474  | 0.363 | 0.223 | 2.33E-33 | 1.4 |
| ESYT2     | 9.92E-38 | -0.608254346 | 0.44  | 0.536 | 2.39E-33 | 1.4 |
| UMAD1     | 1.08E-37 | 0.29016208   | 0.183 | 0.085 | 2.61E-33 | 1.4 |
| PHF21A    | 1.37E-37 | 0.35357103   | 0.346 | 0.209 | 3.31E-33 | 1.4 |
| CCDC66    | 1.50E-37 | 0.276197155  | 0.235 | 0.123 | 3.62E-33 | 1.4 |
| LGALS2    | 1.73E-37 | 0.276722118  | 0.083 | 0.023 | 4.18E-33 | 1.4 |
| GTF2IRD2B | 1.78E-37 | 0.259396088  | 0.15  | 0.063 | 4.30E-33 | 1.4 |
| SSR3      | 1.99E-37 | -0.49839744  | 0.534 | 0.613 | 4.80E-33 | 1.4 |
| CSTB      | 2.26E-37 | 0.389539661  | 0.277 | 0.156 | 5.46E-33 | 1.4 |
| PTRF      | 2.41E-37 | -0.442972498 | 0.094 | 0.206 | 5.81E-33 | 1.4 |
| SNED1     | 2.50E-37 | 0.249168933  | 0.111 | 0.04  | 6.03E-33 | 1.4 |
| PAPSS1    | 3.14E-37 | 0.35604092   | 0.491 | 0.335 | 7.57E-33 | 1.4 |
| RSL24D1   | 3.19E-37 | -0.37672805  | 0.709 | 0.758 | 7.70E-33 | 1.4 |
| BCL11A    | 3.49E-37 | 0.241127344  | 0.115 | 0.042 | 8.41E-33 | 1.4 |

|            |          |              |       |       |          |     |
|------------|----------|--------------|-------|-------|----------|-----|
| CCDC122    | 3.79E-37 | 0.200461023  | 0.097 | 0.031 | 9.15E-33 | 1.4 |
| HIST2H2BE  | 3.81E-37 | 0.298559366  | 0.16  | 0.071 | 9.18E-33 | 1.4 |
| WDR70      | 4.23E-37 | 0.303122349  | 0.208 | 0.104 | 1.02E-32 | 1.4 |
| APLF       | 6.12E-37 | 0.257966207  | 0.146 | 0.062 | 1.48E-32 | 1.4 |
| SEC22A     | 6.53E-37 | 0.27922231   | 0.219 | 0.111 | 1.58E-32 | 1.4 |
| STAC2      | 7.44E-37 | 0.255570944  | 0.098 | 0.032 | 1.79E-32 | 1.4 |
| TGFB2      | 7.85E-37 | -0.630674023 | 0.153 | 0.276 | 1.89E-32 | 1.4 |
| PTN        | 8.99E-37 | -1.076361798 | 0.144 | 0.262 | 2.17E-32 | 1.4 |
| RALGAPA1   | 9.16E-37 | 0.32072793   | 0.335 | 0.201 | 2.21E-32 | 1.4 |
| RLF        | 9.63E-37 | -0.688017491 | 0.264 | 0.379 | 2.32E-32 | 1.4 |
| NBR1       | 1.07E-36 | 0.257790124  | 0.259 | 0.14  | 2.57E-32 | 1.4 |
| SUCLG2     | 1.09E-36 | 0.263393659  | 0.165 | 0.074 | 2.62E-32 | 1.4 |
| PUS10      | 1.13E-36 | 0.212587584  | 0.127 | 0.049 | 2.74E-32 | 1.4 |
| C21orf91   | 1.17E-36 | 0.236294962  | 0.122 | 0.046 | 2.82E-32 | 1.4 |
| TACSTD2    | 1.34E-36 | -0.61390367  | 0.7   | 0.728 | 3.23E-32 | 1.4 |
| SEMA6A-A'  | 1.38E-36 | 0.366648872  | 0.353 | 0.218 | 3.33E-32 | 1.4 |
| TRMT10B    | 2.26E-36 | 0.241341211  | 0.185 | 0.088 | 5.45E-32 | 1.4 |
| KRT19      | 2.64E-36 | -0.67322222  | 0.225 | 0.349 | 6.37E-32 | 1.4 |
| RABGAP1    | 2.67E-36 | 0.296725695  | 0.41  | 0.266 | 6.45E-32 | 1.4 |
| ACSL3      | 3.20E-36 | 0.358226436  | 0.361 | 0.226 | 7.70E-32 | 1.4 |
| ECHDC2     | 3.21E-36 | 0.26443929   | 0.189 | 0.091 | 7.75E-32 | 1.4 |
| NDUFS5     | 3.86E-36 | -0.348320775 | 0.814 | 0.842 | 9.32E-32 | 1.4 |
| AC097724.  | 3.93E-36 | 0.259900519  | 0.148 | 0.064 | 9.48E-32 | 1.4 |
| SLC2A1     | 4.04E-36 | -0.383536309 | 0.02  | 0.101 | 9.75E-32 | 1.4 |
| PLAUR      | 4.65E-36 | -0.578862565 | 0.102 | 0.214 | 1.12E-31 | 1.4 |
| H2AFZ      | 4.85E-36 | -0.568460314 | 0.57  | 0.63  | 1.17E-31 | 1.4 |
| FTL        | 5.40E-36 | -0.906515485 | 0.477 | 0.557 | 1.30E-31 | 1.4 |
| LIMK2      | 5.84E-36 | 0.302967501  | 0.203 | 0.102 | 1.41E-31 | 1.4 |
| TLL5       | 7.32E-36 | 0.327221398  | 0.261 | 0.145 | 1.77E-31 | 1.4 |
| HILPDA     | 7.52E-36 | -0.759649148 | 0.158 | 0.279 | 1.81E-31 | 1.4 |
| C21orf62-A | 9.42E-36 | 0.159939565  | 0.07  | 0.018 | 2.27E-31 | 1.4 |
| DHRS7B     | 9.95E-36 | 0.237991013  | 0.123 | 0.048 | 2.40E-31 | 1.4 |
| PARN       | 1.02E-35 | 0.246152082  | 0.146 | 0.063 | 2.46E-31 | 1.4 |
| RBP5       | 1.11E-35 | 0.185640684  | 0.088 | 0.027 | 2.67E-31 | 1.4 |
| PHIP       | 1.39E-35 | 0.315492955  | 0.538 | 0.379 | 3.36E-31 | 1.4 |
| MGP        | 1.48E-35 | -1.081573249 | 0.857 | 0.873 | 3.57E-31 | 1.4 |
| RNASEH2B   | 1.49E-35 | 0.175412298  | 0.085 | 0.026 | 3.60E-31 | 1.4 |
| CUX1       | 1.49E-35 | 0.293868249  | 0.323 | 0.194 | 3.60E-31 | 1.4 |
| ATAD2B     | 1.60E-35 | 0.293734839  | 0.232 | 0.123 | 3.87E-31 | 1.4 |
| STAT1      | 4.15E-35 | 0.211904664  | 0.135 | 0.056 | 1.00E-30 | 1.4 |
| H6PD       | 4.63E-35 | 0.210799585  | 0.098 | 0.033 | 1.12E-30 | 1.4 |
| SS18       | 4.92E-35 | 0.25579761   | 0.229 | 0.121 | 1.19E-30 | 1.4 |
| IGFBP3     | 5.00E-35 | -0.559576623 | 0.048 | 0.141 | 1.21E-30 | 1.4 |
| SERTAD2    | 5.44E-35 | -0.515899521 | 0.123 | 0.234 | 1.31E-30 | 1.4 |
| ANKRA2     | 5.89E-35 | 0.204069031  | 0.122 | 0.048 | 1.42E-30 | 1.4 |
| RAPGEF2    | 6.23E-35 | -0.649406074 | 0.327 | 0.435 | 1.50E-30 | 1.4 |
| DARS       | 7.45E-35 | 0.321765915  | 0.438 | 0.293 | 1.80E-30 | 1.4 |

|           |          |              |       |       |          |     |
|-----------|----------|--------------|-------|-------|----------|-----|
| NFATC2    | 1.08E-34 | -0.557562618 | 0.072 | 0.172 | 2.61E-30 | 1.4 |
| RICTOR    | 1.14E-34 | -0.585137297 | 0.465 | 0.547 | 2.75E-30 | 1.4 |
| KLK5      | 1.56E-34 | -0.357759689 | 0.015 | 0.089 | 3.76E-30 | 1.4 |
| ZNF544    | 1.67E-34 | 0.23359406   | 0.166 | 0.077 | 4.03E-30 | 1.4 |
| C1orf147  | 1.84E-34 | 0.187897636  | 0.071 | 0.019 | 4.43E-30 | 1.4 |
| MET       | 1.89E-34 | -0.611740068 | 0.268 | 0.383 | 4.56E-30 | 1.4 |
| NR2F2     | 2.12E-34 | 0.228363065  | 0.157 | 0.071 | 5.11E-30 | 1.4 |
| TAF1D     | 2.13E-34 | -0.578410416 | 0.241 | 0.352 | 5.14E-30 | 1.4 |
| RP11-759A | 2.58E-34 | 0.173624032  | 0.072 | 0.02  | 6.22E-30 | 1.4 |
| ICE2      | 2.67E-34 | 0.192883021  | 0.099 | 0.034 | 6.44E-30 | 1.4 |
| SLC25A12  | 3.24E-34 | 0.273862086  | 0.161 | 0.073 | 7.80E-30 | 1.4 |
| IGF1R     | 3.27E-34 | 0.350570667  | 0.525 | 0.375 | 7.88E-30 | 1.4 |
| N4BP2L1   | 3.98E-34 | 0.259894735  | 0.176 | 0.084 | 9.60E-30 | 1.4 |
| BACH2     | 4.30E-34 | -0.683167644 | 0.334 | 0.44  | 1.04E-29 | 1.4 |
| KALRN     | 4.36E-34 | 0.28089654   | 0.203 | 0.103 | 1.05E-29 | 1.4 |
| LHFPL2    | 4.83E-34 | -0.574273102 | 0.321 | 0.428 | 1.17E-29 | 1.4 |
| LINC01137 | 5.09E-34 | 0.21547597   | 0.111 | 0.042 | 1.23E-29 | 1.4 |
| DRAM2     | 5.38E-34 | 0.281547409  | 0.395 | 0.255 | 1.30E-29 | 1.4 |
| ASCC3     | 6.76E-34 | 0.307918032  | 0.299 | 0.177 | 1.63E-29 | 1.4 |
| CDR2      | 6.93E-34 | 0.275717934  | 0.216 | 0.113 | 1.67E-29 | 1.4 |
| RCOR3     | 7.34E-34 | 0.284719478  | 0.159 | 0.074 | 1.77E-29 | 1.4 |
| RASGEF1A  | 7.80E-34 | 0.194181793  | 0.082 | 0.025 | 1.88E-29 | 1.4 |
| PNRC1     | 9.09E-34 | 0.285396388  | 0.649 | 0.497 | 2.19E-29 | 1.4 |
| SAA4      | 9.15E-34 | 0.223071313  | 0.385 | 0.24  | 2.21E-29 | 1.4 |
| KCTD9     | 1.01E-33 | -0.604364786 | 0.216 | 0.331 | 2.42E-29 | 1.4 |
| C9orf91   | 1.03E-33 | 0.187749027  | 0.073 | 0.02  | 2.49E-29 | 1.4 |
| SF3B6     | 1.12E-33 | -0.430667624 | 0.63  | 0.677 | 2.70E-29 | 1.4 |
| ZNF397    | 1.42E-33 | 0.247592694  | 0.184 | 0.091 | 3.42E-29 | 1.4 |
| TMEM87A   | 1.53E-33 | 0.322562043  | 0.468 | 0.325 | 3.68E-29 | 1.4 |
| SCAPER    | 1.67E-33 | 0.298514206  | 0.311 | 0.188 | 4.02E-29 | 1.4 |
| CRTC3     | 1.72E-33 | 0.296230344  | 0.355 | 0.224 | 4.14E-29 | 1.4 |
| PHF14     | 1.89E-33 | 0.324896866  | 0.22  | 0.119 | 4.57E-29 | 1.4 |
| RPL22L1   | 1.96E-33 | -0.526802362 | 0.518 | 0.578 | 4.72E-29 | 1.4 |
| ALDH9A1   | 2.12E-33 | 0.227097407  | 0.146 | 0.064 | 5.11E-29 | 1.4 |
| RP1-167A1 | 2.29E-33 | 0.232330969  | 0.106 | 0.039 | 5.52E-29 | 1.4 |
| PARP4     | 2.54E-33 | 0.283054205  | 0.283 | 0.165 | 6.11E-29 | 1.4 |
| MSH3      | 2.74E-33 | 0.312552695  | 0.17  | 0.082 | 6.60E-29 | 1.4 |
| ISLR      | 3.01E-33 | 0.119580833  | 0.042 | 0.006 | 7.25E-29 | 1.4 |
| WAC       | 3.04E-33 | -0.480394596 | 0.581 | 0.645 | 7.33E-29 | 1.4 |
| CEP192    | 4.27E-33 | 0.278884181  | 0.154 | 0.071 | 1.03E-28 | 1.4 |
| ANKRD26   | 4.88E-33 | 0.225961264  | 0.131 | 0.055 | 1.18E-28 | 1.4 |
| CASC4     | 5.01E-33 | 0.29093583   | 0.269 | 0.155 | 1.21E-28 | 1.4 |
| NUDT7     | 5.02E-33 | 0.171816105  | 0.09  | 0.03  | 1.21E-28 | 1.4 |
| DIAPH2    | 5.33E-33 | 0.329588428  | 0.373 | 0.239 | 1.29E-28 | 1.4 |
| ATXN3     | 5.65E-33 | 0.286107645  | 0.247 | 0.139 | 1.36E-28 | 1.4 |
| SLC12A2   | 6.88E-33 | 0.289981733  | 0.657 | 0.498 | 1.66E-28 | 1.4 |
| PRKD1     | 7.51E-33 | 0.294788383  | 0.243 | 0.134 | 1.81E-28 | 1.4 |

|            |          |              |       |       |          |     |
|------------|----------|--------------|-------|-------|----------|-----|
| EPB41L1    | 7.56E-33 | 0.314395655  | 0.168 | 0.081 | 1.82E-28 | 1.4 |
| ZFP14      | 8.20E-33 | 0.20329349   | 0.126 | 0.053 | 1.98E-28 | 1.4 |
| FLOT2      | 8.67E-33 | 0.239053395  | 0.106 | 0.04  | 2.09E-28 | 1.4 |
| PAPD4      | 8.80E-33 | 0.302358538  | 0.392 | 0.259 | 2.12E-28 | 1.4 |
| USP13      | 9.76E-33 | 0.274869479  | 0.152 | 0.07  | 2.35E-28 | 1.4 |
| CD2AP      | 1.08E-32 | -0.592699513 | 0.306 | 0.412 | 2.60E-28 | 1.4 |
| CASP4      | 1.14E-32 | 0.277243601  | 0.39  | 0.255 | 2.76E-28 | 1.4 |
| PTPRJ      | 1.32E-32 | -0.554324197 | 0.24  | 0.351 | 3.18E-28 | 1.4 |
| ADGRL2     | 1.36E-32 | 0.370304931  | 0.195 | 0.1   | 3.28E-28 | 1.4 |
| RFX3-AS1   | 1.44E-32 | 0.250869672  | 0.126 | 0.053 | 3.48E-28 | 1.4 |
| C10orf76   | 1.55E-32 | 0.223978777  | 0.208 | 0.108 | 3.74E-28 | 1.4 |
| OGT        | 1.56E-32 | -0.510425995 | 0.287 | 0.397 | 3.75E-28 | 1.4 |
| COL6A2     | 1.70E-32 | -0.551483691 | 0.071 | 0.166 | 4.10E-28 | 1.4 |
| NAMPT      | 1.75E-32 | 0.413364875  | 0.687 | 0.548 | 4.21E-28 | 1.4 |
| FBXO9      | 1.76E-32 | 0.191588649  | 0.126 | 0.052 | 4.25E-28 | 1.4 |
| PLCB4      | 2.03E-32 | 0.277321686  | 0.192 | 0.098 | 4.88E-28 | 1.4 |
| FUT8       | 2.51E-32 | 0.284675373  | 0.154 | 0.071 | 6.06E-28 | 1.4 |
| PDE7A      | 2.63E-32 | 0.362255126  | 0.357 | 0.231 | 6.33E-28 | 1.4 |
| TBC1D32    | 3.24E-32 | 0.261704598  | 0.102 | 0.038 | 7.81E-28 | 1.4 |
| DOCK1      | 3.28E-32 | 0.301562674  | 0.401 | 0.265 | 7.91E-28 | 1.4 |
| ITGB4      | 3.48E-32 | 0.2408438    | 0.1   | 0.037 | 8.38E-28 | 1.4 |
| KIAA1324   | 3.53E-32 | 0.317131108  | 0.173 | 0.085 | 8.50E-28 | 1.4 |
| MAGI2      | 3.79E-32 | 0.349595505  | 0.158 | 0.074 | 9.13E-28 | 1.4 |
| MORF4L1    | 3.80E-32 | -0.370702995 | 0.667 | 0.703 | 9.16E-28 | 1.4 |
| TYW5       | 4.24E-32 | 0.204934277  | 0.117 | 0.047 | 1.02E-27 | 1.4 |
| COBL       | 4.31E-32 | -0.643741627 | 0.433 | 0.52  | 1.04E-27 | 1.4 |
| FANCL      | 4.34E-32 | 0.209528414  | 0.138 | 0.06  | 1.05E-27 | 1.4 |
| MALAT1     | 5.06E-32 | -0.23928702  | 1     | 1     | 1.22E-27 | 1.4 |
| RABGAP1L   | 5.25E-32 | 0.26170893   | 0.319 | 0.195 | 1.27E-27 | 1.4 |
| MYBL1      | 7.22E-32 | 0.209505038  | 0.085 | 0.028 | 1.74E-27 | 1.4 |
| CCDC91     | 7.26E-32 | 0.299056746  | 0.463 | 0.318 | 1.75E-27 | 1.4 |
| PIP5K1B    | 8.62E-32 | 0.282823676  | 0.115 | 0.047 | 2.08E-27 | 1.4 |
| CSGALNAC   | 8.80E-32 | 0.241875872  | 0.15  | 0.069 | 2.12E-27 | 1.4 |
| C14orf159  | 8.94E-32 | 0.195712701  | 0.12  | 0.049 | 2.15E-27 | 1.4 |
| WDR11      | 9.55E-32 | 0.226325112  | 0.136 | 0.06  | 2.30E-27 | 1.4 |
| PIK3IP1    | 1.03E-31 | 0.191360971  | 0.119 | 0.049 | 2.48E-27 | 1.4 |
| MICU1      | 1.06E-31 | 0.284775231  | 0.307 | 0.187 | 2.56E-27 | 1.4 |
| PDIA6      | 1.28E-31 | -0.52060487  | 0.166 | 0.274 | 3.08E-27 | 1.4 |
| FBXW4      | 1.29E-31 | 0.246066367  | 0.134 | 0.058 | 3.12E-27 | 1.4 |
| THAP6      | 1.48E-31 | 0.202401691  | 0.126 | 0.053 | 3.57E-27 | 1.4 |
| PLA2G4C    | 1.69E-31 | 0.217296017  | 0.106 | 0.041 | 4.08E-27 | 1.4 |
| YWHAE      | 1.82E-31 | -0.419404684 | 0.569 | 0.636 | 4.40E-27 | 1.4 |
| ATF3       | 1.84E-31 | -0.628753191 | 0.266 | 0.371 | 4.45E-27 | 1.4 |
| TAF15      | 2.18E-31 | 0.310150203  | 0.418 | 0.282 | 5.26E-27 | 1.4 |
| CTB-91J4.1 | 2.48E-31 | 0.1644169    | 0.035 | 0.004 | 5.98E-27 | 1.4 |
| SMC6       | 2.56E-31 | 0.211815615  | 0.131 | 0.057 | 6.17E-27 | 1.4 |
| ASH1L      | 2.67E-31 | 0.294376443  | 0.607 | 0.461 | 6.44E-27 | 1.4 |



|           |          |              |       |       |          |     |
|-----------|----------|--------------|-------|-------|----------|-----|
| RP11-867G | 3.07E-31 | 0.212378991  | 0.078 | 0.025 | 7.40E-27 | 1.4 |
| OXSR1     | 3.07E-31 | -0.462843101 | 0.154 | 0.262 | 7.41E-27 | 1.4 |
| ACTR3C    | 3.13E-31 | 0.227024161  | 0.094 | 0.034 | 7.54E-27 | 1.4 |
| ZNF254    | 3.14E-31 | 0.259076799  | 0.238 | 0.134 | 7.58E-27 | 1.4 |
| SLC15A1   | 3.29E-31 | 0.192548779  | 0.069 | 0.02  | 7.95E-27 | 1.4 |
| DIS3L2    | 3.83E-31 | 0.244326556  | 0.169 | 0.083 | 9.24E-27 | 1.4 |
| CTPS2     | 3.94E-31 | 0.219832862  | 0.12  | 0.05  | 9.50E-27 | 1.4 |
| CRADD     | 4.59E-31 | 0.300942674  | 0.163 | 0.079 | 1.11E-26 | 1.4 |
| GARS      | 4.72E-31 | -0.405949104 | 0.11  | 0.213 | 1.14E-26 | 1.4 |
| GALNT15   | 5.11E-31 | 0.357518325  | 0.216 | 0.118 | 1.23E-26 | 1.4 |
| CTD-2315E | 5.64E-31 | 0.140430372  | 0.05  | 0.01  | 1.36E-26 | 1.4 |
| STRA6     | 6.95E-31 | 0.106460141  | 0.031 | 0.003 | 1.68E-26 | 1.4 |
| SLC6A16   | 7.90E-31 | 0.193429471  | 0.091 | 0.032 | 1.91E-26 | 1.4 |
| AKR1C2    | 8.44E-31 | 0.255922504  | 0.131 | 0.058 | 2.04E-26 | 1.4 |
| SAMD9L    | 8.61E-31 | 0.159811443  | 0.063 | 0.017 | 2.08E-26 | 1.4 |
| NFIB      | 8.83E-31 | 0.2153676    | 0.925 | 0.826 | 2.13E-26 | 1.4 |
| TLR1      | 9.18E-31 | 0.238230223  | 0.107 | 0.042 | 2.21E-26 | 1.4 |
| L3MBTL4   | 9.28E-31 | 0.280729767  | 0.446 | 0.303 | 2.24E-26 | 1.4 |
| TMCC1     | 9.83E-31 | 0.308329764  | 0.371 | 0.243 | 2.37E-26 | 1.4 |
| ARFGEF2   | 1.08E-30 | 0.255219013  | 0.439 | 0.295 | 2.62E-26 | 1.4 |
| RP11-692D | 1.23E-30 | 0.184783134  | 0.069 | 0.02  | 2.97E-26 | 1.4 |
| IQCK      | 1.42E-30 | 0.215801163  | 0.101 | 0.038 | 3.43E-26 | 1.4 |
| SLCO1A2   | 1.54E-30 | 0.186537041  | 0.063 | 0.017 | 3.71E-26 | 1.4 |
| SEMA4B    | 1.69E-30 | 0.314842134  | 0.24  | 0.137 | 4.08E-26 | 1.4 |
| PLA2G4A   | 1.73E-30 | 0.189255134  | 0.093 | 0.034 | 4.18E-26 | 1.4 |
| ZCCHC6    | 2.01E-30 | 0.296924782  | 0.447 | 0.309 | 4.85E-26 | 1.4 |
| ABCA1     | 2.04E-30 | 0.11765816   | 0.051 | 0.011 | 4.91E-26 | 1.4 |
| RAB11FIP1 | 2.05E-30 | -0.506712114 | 0.448 | 0.54  | 4.93E-26 | 1.4 |
| LIMCH1    | 2.06E-30 | 0.256511853  | 0.366 | 0.234 | 4.96E-26 | 1.4 |
| ZNF438    | 2.14E-30 | 0.219252731  | 0.122 | 0.052 | 5.16E-26 | 1.4 |
| ADD3      | 2.25E-30 | 0.295439889  | 0.234 | 0.133 | 5.44E-26 | 1.4 |
| FOXO1     | 2.30E-30 | 0.264816622  | 0.343 | 0.219 | 5.54E-26 | 1.4 |
| ANTXR1    | 2.44E-30 | 0.212563764  | 0.103 | 0.04  | 5.88E-26 | 1.4 |
| RP11-1069 | 2.52E-30 | 0.160567469  | 0.067 | 0.019 | 6.08E-26 | 1.4 |
| CLIC6     | 3.19E-30 | 0.257906033  | 0.174 | 0.087 | 7.69E-26 | 1.4 |
| NIPAL3    | 3.40E-30 | 0.24447697   | 0.133 | 0.06  | 8.19E-26 | 1.4 |
| IQGAP2    | 3.41E-30 | 0.205270231  | 0.129 | 0.057 | 8.22E-26 | 1.4 |
| ZFH3      | 3.47E-30 | 0.269611035  | 0.181 | 0.093 | 8.36E-26 | 1.4 |
| ZNF43     | 3.76E-30 | 0.248324808  | 0.213 | 0.116 | 9.08E-26 | 1.4 |
| FOSL1     | 5.27E-30 | -0.396660124 | 0.04  | 0.12  | 1.27E-25 | 1.4 |
| ATG10     | 5.42E-30 | 0.308057852  | 0.211 | 0.115 | 1.31E-25 | 1.4 |
| DMGDH     | 6.32E-30 | 0.183202569  | 0.08  | 0.026 | 1.52E-25 | 1.4 |
| FBXO32    | 6.52E-30 | 0.420991399  | 0.519 | 0.378 | 1.57E-25 | 1.4 |
| SAP18     | 7.02E-30 | -0.386905814 | 0.557 | 0.62  | 1.69E-25 | 1.4 |
| MT-CO3    | 8.16E-30 | 0.17434485   | 0.99  | 0.996 | 1.97E-25 | 1.4 |
| RAI14     | 8.57E-30 | -0.445685479 | 0.098 | 0.197 | 2.07E-25 | 1.4 |
| MGAT3     | 9.23E-30 | 0.135470738  | 0.048 | 0.01  | 2.23E-25 | 1.4 |

|           |          |              |       |       |          |     |
|-----------|----------|--------------|-------|-------|----------|-----|
| TSFM      | 9.30E-30 | 0.184369239  | 0.1   | 0.038 | 2.24E-25 | 1.4 |
| CLASP2    | 9.80E-30 | 0.291083322  | 0.319 | 0.202 | 2.36E-25 | 1.4 |
| PIK3C2B   | 9.95E-30 | 0.198863524  | 0.074 | 0.024 | 2.40E-25 | 1.4 |
| ZNF235    | 1.04E-29 | 0.215634824  | 0.129 | 0.057 | 2.51E-25 | 1.4 |
| ATP13A5   | 1.05E-29 | 0.289230442  | 0.089 | 0.032 | 2.54E-25 | 1.4 |
| SUSD4     | 1.44E-29 | 0.149492387  | 0.071 | 0.022 | 3.48E-25 | 1.4 |
| FAM129A   | 1.46E-29 | 0.337082786  | 0.587 | 0.44  | 3.52E-25 | 1.4 |
| NAIP      | 1.63E-29 | 0.235940315  | 0.112 | 0.046 | 3.92E-25 | 1.4 |
| FBXL20    | 1.66E-29 | 0.253533175  | 0.347 | 0.222 | 3.99E-25 | 1.4 |
| PNPLA3    | 1.75E-29 | 0.188493175  | 0.075 | 0.024 | 4.23E-25 | 1.4 |
| C2        | 1.81E-29 | 0.155284081  | 0.065 | 0.018 | 4.36E-25 | 1.4 |
| RASSF4    | 1.93E-29 | 0.127289822  | 0.054 | 0.013 | 4.66E-25 | 1.4 |
| FGFR2     | 2.06E-29 | 0.204578104  | 0.079 | 0.026 | 4.96E-25 | 1.4 |
| KLF6      | 2.19E-29 | -0.505068258 | 0.47  | 0.546 | 5.27E-25 | 1.4 |
| CGNL1     | 2.39E-29 | 0.262281232  | 0.201 | 0.109 | 5.76E-25 | 1.4 |
| TANK      | 2.45E-29 | 0.285901589  | 0.739 | 0.597 | 5.91E-25 | 1.4 |
| MCPh1     | 2.91E-29 | 0.289902697  | 0.243 | 0.141 | 7.02E-25 | 1.4 |
| NEK9      | 2.92E-29 | 0.203284822  | 0.121 | 0.052 | 7.04E-25 | 1.4 |
| RPS6      | 2.96E-29 | -0.188040835 | 0.975 | 0.987 | 7.13E-25 | 1.4 |
| TTLL4     | 3.27E-29 | 0.259290459  | 0.246 | 0.143 | 7.88E-25 | 1.4 |
| ZNF630    | 3.38E-29 | 0.169168884  | 0.063 | 0.018 | 8.16E-25 | 1.4 |
| ARFGEF3   | 3.41E-29 | -0.486805069 | 0.153 | 0.255 | 8.22E-25 | 1.4 |
| CTD-2337A | 3.42E-29 | 0.327152093  | 0.272 | 0.162 | 8.24E-25 | 1.4 |
| ASCC1     | 3.78E-29 | 0.252496319  | 0.248 | 0.145 | 9.11E-25 | 1.4 |
| RP11-774D | 3.87E-29 | 0.18843986   | 0.108 | 0.044 | 9.34E-25 | 1.4 |
| SPP1      | 4.18E-29 | 0.566420893  | 0.05  | 0.011 | 1.01E-24 | 1.4 |
| TUBA1A    | 4.30E-29 | -0.520443846 | 0.176 | 0.281 | 1.04E-24 | 1.4 |
| CCDC6     | 4.41E-29 | -0.503103602 | 0.264 | 0.368 | 1.06E-24 | 1.4 |
| SRGAP2    | 4.71E-29 | 0.258984453  | 0.181 | 0.094 | 1.14E-24 | 1.4 |
| PITPNA    | 4.78E-29 | 0.253526841  | 0.214 | 0.118 | 1.15E-24 | 1.4 |
| DPP8      | 5.17E-29 | 0.24178824   | 0.142 | 0.066 | 1.25E-24 | 1.4 |
| ZNF618    | 6.41E-29 | 0.132355315  | 0.056 | 0.014 | 1.55E-24 | 1.4 |
| SYNE2     | 6.53E-29 | 0.288857388  | 0.617 | 0.472 | 1.57E-24 | 1.4 |
| ERBB4     | 6.79E-29 | 0.310436224  | 0.177 | 0.092 | 1.64E-24 | 1.4 |
| RPL34     | 6.99E-29 | -0.18866723  | 0.975 | 0.988 | 1.69E-24 | 1.4 |
| B4GALT1   | 7.29E-29 | 0.316821102  | 0.506 | 0.369 | 1.76E-24 | 1.4 |
| SLC9A8    | 7.71E-29 | 0.217862861  | 0.147 | 0.07  | 1.86E-24 | 1.4 |
| SLC35E3   | 8.02E-29 | 0.254653462  | 0.155 | 0.076 | 1.93E-24 | 1.4 |
| TC2N      | 1.00E-28 | 0.270674136  | 0.454 | 0.313 | 2.42E-24 | 1.4 |
| KCCAT211  | 1.04E-28 | 0.267666155  | 0.1   | 0.039 | 2.51E-24 | 1.4 |
| PIBF1     | 1.09E-28 | 0.267900087  | 0.294 | 0.183 | 2.64E-24 | 1.4 |
| ENSA      | 1.14E-28 | 0.285881976  | 0.484 | 0.346 | 2.75E-24 | 1.4 |
| TXN       | 1.23E-28 | -0.40311663  | 0.683 | 0.715 | 2.97E-24 | 1.4 |
| ZNF710    | 1.29E-28 | 0.23303863   | 0.161 | 0.08  | 3.11E-24 | 1.4 |
| TTBK2     | 1.43E-28 | 0.247278741  | 0.183 | 0.096 | 3.44E-24 | 1.4 |
| BICD1     | 1.61E-28 | 0.331662074  | 0.274 | 0.167 | 3.89E-24 | 1.4 |
| AKAP6     | 1.70E-28 | 0.217270422  | 0.096 | 0.037 | 4.09E-24 | 1.4 |

|           |          |              |       |       |          |     |
|-----------|----------|--------------|-------|-------|----------|-----|
| SEC62     | 1.70E-28 | -0.48511492  | 0.587 | 0.639 | 4.09E-24 | 1.4 |
| RNF175    | 1.76E-28 | 0.217189909  | 0.093 | 0.035 | 4.25E-24 | 1.4 |
| ERBB2IP   | 1.79E-28 | 0.297228048  | 0.362 | 0.241 | 4.33E-24 | 1.4 |
| SCLT1     | 1.81E-28 | 0.239330258  | 0.089 | 0.033 | 4.36E-24 | 1.4 |
| ORC3      | 1.89E-28 | 0.207092898  | 0.135 | 0.062 | 4.55E-24 | 1.4 |
| APTX      | 2.03E-28 | 0.23702919   | 0.212 | 0.118 | 4.89E-24 | 1.4 |
| FAM177B   | 2.32E-28 | 0.348977877  | 0.749 | 0.604 | 5.59E-24 | 1.4 |
| APOL1     | 2.41E-28 | 0.153644917  | 0.069 | 0.021 | 5.81E-24 | 1.4 |
| SP1       | 2.53E-28 | 0.23945214   | 0.209 | 0.116 | 6.10E-24 | 1.4 |
| VWA5A     | 2.63E-28 | 0.206403651  | 0.17  | 0.087 | 6.33E-24 | 1.4 |
| TTC14     | 2.67E-28 | 0.223555428  | 0.126 | 0.056 | 6.43E-24 | 1.4 |
| DYNLL1    | 2.78E-28 | -0.501088716 | 0.157 | 0.257 | 6.69E-24 | 1.4 |
| TMEM176E  | 3.00E-28 | 0.188283219  | 0.091 | 0.034 | 7.23E-24 | 1.4 |
| FAM120B   | 3.07E-28 | 0.242758175  | 0.176 | 0.092 | 7.40E-24 | 1.4 |
| LARP7     | 3.28E-28 | 0.24331695   | 0.25  | 0.148 | 7.90E-24 | 1.4 |
| ZDHHC20   | 3.33E-28 | 0.283749393  | 0.22  | 0.125 | 8.02E-24 | 1.4 |
| SMPDL3A   | 3.47E-28 | 0.130597629  | 0.051 | 0.012 | 8.36E-24 | 1.4 |
| MCEE      | 3.47E-28 | 0.15433946   | 0.069 | 0.021 | 8.37E-24 | 1.4 |
| GSAP      | 3.54E-28 | 0.254937391  | 0.224 | 0.127 | 8.54E-24 | 1.4 |
| RBM6      | 3.86E-28 | 0.267918861  | 0.432 | 0.296 | 9.30E-24 | 1.4 |
| SLC38A1   | 4.03E-28 | -0.434190214 | 0.209 | 0.314 | 9.71E-24 | 1.4 |
| LPL       | 4.12E-28 | 0.212546626  | 0.102 | 0.041 | 9.93E-24 | 1.4 |
| POC1B     | 5.08E-28 | 0.204550557  | 0.156 | 0.077 | 1.22E-23 | 1.4 |
| CHSY3     | 5.15E-28 | 0.197235973  | 0.045 | 0.009 | 1.24E-23 | 1.4 |
| IRAK3     | 5.35E-28 | 0.122992666  | 0.049 | 0.011 | 1.29E-23 | 1.4 |
| DYNLT1    | 5.46E-28 | 0.232036926  | 0.735 | 0.576 | 1.32E-23 | 1.4 |
| LRIG3     | 7.45E-28 | 0.183688686  | 0.101 | 0.04  | 1.80E-23 | 1.4 |
| WWC1      | 7.62E-28 | 0.353480436  | 0.555 | 0.417 | 1.84E-23 | 1.4 |
| AC073283  | 7.62E-28 | 0.250228135  | 0.176 | 0.092 | 1.84E-23 | 1.4 |
| PLEKHA7   | 9.09E-28 | -0.168032614 | 0.979 | 0.987 | 2.19E-23 | 1.4 |
| TTC17     | 9.40E-28 | 0.265479612  | 0.376 | 0.252 | 2.27E-23 | 1.4 |
| RP5-1198O | 1.10E-27 | 0.331657972  | 0.23  | 0.133 | 2.66E-23 | 1.4 |
| NAV2      | 1.12E-27 | -0.763909509 | 0.384 | 0.455 | 2.69E-23 | 1.4 |
| RAB29     | 1.12E-27 | 0.178628795  | 0.135 | 0.063 | 2.69E-23 | 1.4 |
| CLK4      | 1.19E-27 | 0.202651679  | 0.115 | 0.05  | 2.88E-23 | 1.4 |
| ARL4C     | 1.21E-27 | -0.461605252 | 0.143 | 0.242 | 2.92E-23 | 1.4 |
| SCGB1D2   | 1.35E-27 | -1.368524629 | 0.039 | 0.114 | 3.25E-23 | 1.4 |
| CIR1      | 1.39E-27 | 0.248955233  | 0.39  | 0.263 | 3.35E-23 | 1.4 |
| RAP1GAP2  | 1.43E-27 | 0.315468357  | 0.24  | 0.142 | 3.46E-23 | 1.4 |
| SLC16A1-A | 1.93E-27 | 0.252344092  | 0.176 | 0.092 | 4.66E-23 | 1.4 |
| PHC3      | 2.34E-27 | 0.230271433  | 0.26  | 0.157 | 5.63E-23 | 1.4 |
| CEP295    | 2.56E-27 | 0.168701192  | 0.105 | 0.043 | 6.18E-23 | 1.4 |
| PACRGL    | 2.68E-27 | 0.140425771  | 0.074 | 0.025 | 6.46E-23 | 1.4 |
| ZNF718    | 2.84E-27 | 0.197275823  | 0.105 | 0.044 | 6.85E-23 | 1.4 |
| SYCP2     | 2.96E-27 | 0.166961225  | 0.066 | 0.02  | 7.14E-23 | 1.4 |
| ATXN7L1   | 2.99E-27 | 0.190350784  | 0.107 | 0.045 | 7.21E-23 | 1.4 |
| ELOVL6    | 3.21E-27 | 0.28485944   | 0.135 | 0.064 | 7.74E-23 | 1.4 |

|           |          |              |       |       |          |     |
|-----------|----------|--------------|-------|-------|----------|-----|
| RP5-1101C | 3.25E-27 | 0.189975033  | 0.095 | 0.037 | 7.83E-23 | 1.4 |
| EIF3E     | 3.88E-27 | -0.320064499 | 0.78  | 0.805 | 9.35E-23 | 1.4 |
| DDX5      | 4.66E-27 | 0.298578121  | 0.617 | 0.467 | 1.12E-22 | 1.4 |
| TFCP2     | 4.97E-27 | 0.260732865  | 0.203 | 0.113 | 1.20E-22 | 1.4 |
| GPRC5B    | 5.65E-27 | 0.230904993  | 0.112 | 0.049 | 1.36E-22 | 1.4 |
| RBM41     | 5.93E-27 | 0.166288274  | 0.143 | 0.069 | 1.43E-22 | 1.4 |
| LAMTOR5   | 6.07E-27 | -0.380043873 | 0.572 | 0.625 | 1.46E-22 | 1.4 |
| GPD2      | 6.89E-27 | 0.228617358  | 0.329 | 0.209 | 1.66E-22 | 1.4 |
| SEPP1     | 6.99E-27 | 0.204537135  | 0.468 | 0.326 | 1.69E-22 | 1.4 |
| DDX60     | 7.90E-27 | 0.148759957  | 0.055 | 0.015 | 1.91E-22 | 1.4 |
| HMG20A    | 7.96E-27 | 0.194768523  | 0.102 | 0.042 | 1.92E-22 | 1.4 |
| RFWD2     | 8.96E-27 | 0.243596374  | 0.387 | 0.26  | 2.16E-22 | 1.4 |
| RPL14     | 9.28E-27 | -0.247810406 | 0.97  | 0.985 | 2.24E-22 | 1.4 |
| NSF       | 9.42E-27 | 0.248414491  | 0.228 | 0.132 | 2.27E-22 | 1.4 |
| LYPLAL1   | 1.10E-26 | 0.198370027  | 0.129 | 0.06  | 2.66E-22 | 1.4 |
| ELMOD3    | 1.11E-26 | 0.182606908  | 0.144 | 0.07  | 2.67E-22 | 1.4 |
| PPP2CB    | 1.17E-26 | -0.491946448 | 0.237 | 0.334 | 2.82E-22 | 1.4 |
| KCMF1     | 1.20E-26 | -0.519749093 | 0.232 | 0.328 | 2.88E-22 | 1.4 |
| RBPMS     | 1.20E-26 | 0.261857892  | 0.864 | 0.763 | 2.89E-22 | 1.4 |
| SLC47A1   | 1.22E-26 | -0.219378747 | 0.932 | 0.951 | 2.94E-22 | 1.4 |
| UBR1      | 1.27E-26 | 0.234661382  | 0.194 | 0.107 | 3.06E-22 | 1.4 |
| MTX2      | 1.29E-26 | 0.215392498  | 0.118 | 0.053 | 3.11E-22 | 1.4 |
| S100A10   | 1.33E-26 | -0.603726282 | 0.235 | 0.335 | 3.20E-22 | 1.4 |
| MARCKS    | 1.40E-26 | 0.318969808  | 0.526 | 0.395 | 3.37E-22 | 1.4 |
| NAA38     | 1.59E-26 | 0.215066291  | 0.109 | 0.047 | 3.83E-22 | 1.4 |
| NBN       | 2.01E-26 | 0.187101692  | 0.115 | 0.05  | 4.84E-22 | 1.4 |
| SLC30A7   | 2.12E-26 | 0.261447482  | 0.18  | 0.097 | 5.11E-22 | 1.4 |
| THUMPD1   | 2.35E-26 | 0.198193625  | 0.135 | 0.064 | 5.67E-22 | 1.4 |
| RAD21     | 2.37E-26 | -0.492233106 | 0.291 | 0.384 | 5.71E-22 | 1.4 |
| ZNF22     | 2.37E-26 | 0.246903795  | 0.318 | 0.205 | 5.72E-22 | 1.4 |
| KPNA1     | 2.45E-26 | -0.474694448 | 0.199 | 0.297 | 5.91E-22 | 1.4 |
| RP11-96H1 | 2.47E-26 | 0.288958288  | 0.172 | 0.092 | 5.96E-22 | 1.4 |
| ZNF143    | 2.75E-26 | -0.390251481 | 0.086 | 0.172 | 6.64E-22 | 1.4 |
| BBS4      | 2.85E-26 | 0.171708369  | 0.093 | 0.037 | 6.88E-22 | 1.4 |
| BBIP1     | 2.87E-26 | 0.207093745  | 0.164 | 0.085 | 6.91E-22 | 1.4 |
| TAPBP     | 3.00E-26 | 0.244743237  | 0.188 | 0.102 | 7.24E-22 | 1.4 |
| TTC39B    | 3.05E-26 | 0.223912538  | 0.16  | 0.083 | 7.36E-22 | 1.4 |
| SEC61G    | 3.10E-26 | -0.411256399 | 0.683 | 0.708 | 7.48E-22 | 1.4 |
| ATP6AP1L  | 3.29E-26 | 0.129479559  | 0.063 | 0.019 | 7.94E-22 | 1.4 |
| PACS1     | 3.37E-26 | 0.288215918  | 0.391 | 0.27  | 8.13E-22 | 1.4 |
| RPS6KA3   | 4.00E-26 | -0.512558665 | 0.272 | 0.371 | 9.64E-22 | 1.4 |
| GBAS      | 4.28E-26 | 0.209577966  | 0.268 | 0.164 | 1.03E-21 | 1.4 |
| ACSL1     | 4.43E-26 | 0.270925009  | 0.316 | 0.203 | 1.07E-21 | 1.4 |
| DNAJC1    | 4.43E-26 | 0.220386885  | 0.286 | 0.179 | 1.07E-21 | 1.4 |
| TEAD1     | 4.47E-26 | -0.476712079 | 0.296 | 0.395 | 1.08E-21 | 1.4 |
| PCBP1     | 4.71E-26 | -0.45759979  | 0.429 | 0.497 | 1.14E-21 | 1.4 |
| FAM63B    | 4.77E-26 | 0.230541368  | 0.195 | 0.109 | 1.15E-21 | 1.4 |

|           |          |              |       |       |          |     |
|-----------|----------|--------------|-------|-------|----------|-----|
| DHFR      | 5.08E-26 | -0.381144681 | 0.832 | 0.854 | 1.23E-21 | 1.4 |
| TRAF3IP2  | 5.44E-26 | 0.239259573  | 0.248 | 0.149 | 1.31E-21 | 1.4 |
| WEE1      | 5.89E-26 | -0.451550619 | 0.193 | 0.291 | 1.42E-21 | 1.4 |
| PAWR      | 6.44E-26 | -0.498931827 | 0.425 | 0.5   | 1.55E-21 | 1.4 |
| RHBDF2    | 6.51E-26 | 0.149775096  | 0.115 | 0.05  | 1.57E-21 | 1.4 |
| CXCL1     | 6.72E-26 | 0.366999677  | 0.334 | 0.223 | 1.62E-21 | 1.4 |
| ATG7      | 7.60E-26 | 0.234973728  | 0.303 | 0.193 | 1.83E-21 | 1.4 |
| S100A9    | 8.25E-26 | 0.416156642  | 0.115 | 0.051 | 1.99E-21 | 1.4 |
| SMYD3     | 9.67E-26 | 0.314622875  | 0.311 | 0.202 | 2.33E-21 | 1.4 |
| PTPN4     | 1.07E-25 | 0.20281408   | 0.146 | 0.072 | 2.59E-21 | 1.4 |
| KCTD1     | 1.21E-25 | 0.183833036  | 0.085 | 0.032 | 2.92E-21 | 1.4 |
| ALDH1A2   | 1.29E-25 | 0.213721255  | 0.076 | 0.027 | 3.12E-21 | 1.4 |
| MPHOSPH8  | 1.33E-25 | 0.226789886  | 0.239 | 0.143 | 3.20E-21 | 1.4 |
| RP11-39M7 | 1.33E-25 | 0.162986648  | 0.08  | 0.029 | 3.20E-21 | 1.4 |
| HK2       | 1.34E-25 | -0.432613719 | 0.106 | 0.195 | 3.24E-21 | 1.4 |
| IL15RA    | 1.37E-25 | 0.196506215  | 0.102 | 0.043 | 3.31E-21 | 1.4 |
| FTO       | 1.47E-25 | 0.230103462  | 0.321 | 0.207 | 3.55E-21 | 1.4 |
| MIR222HG  | 1.48E-25 | -0.400229012 | 0.044 | 0.117 | 3.56E-21 | 1.4 |
| HIST1H2BB | 1.51E-25 | 0.245174025  | 0.202 | 0.114 | 3.65E-21 | 1.4 |
| PTGR1     | 1.60E-25 | 0.235067082  | 0.347 | 0.229 | 3.87E-21 | 1.4 |
| ZNF135    | 1.78E-25 | 0.122054988  | 0.061 | 0.019 | 4.28E-21 | 1.4 |
| PPA2      | 1.78E-25 | 0.248433923  | 0.28  | 0.175 | 4.29E-21 | 1.4 |
| MAMDC2    | 1.79E-25 | -0.287109811 | 0.928 | 0.944 | 4.32E-21 | 1.4 |
| COX7B     | 1.83E-25 | -0.372094533 | 0.629 | 0.667 | 4.42E-21 | 1.4 |
| UBAC2     | 2.25E-25 | 0.2417605    | 0.294 | 0.186 | 5.44E-21 | 1.4 |
| WDSUB1    | 2.33E-25 | 0.180655864  | 0.101 | 0.043 | 5.62E-21 | 1.4 |
| CHDH      | 2.35E-25 | 0.19075221   | 0.096 | 0.039 | 5.66E-21 | 1.4 |
| TUBA1B    | 2.43E-25 | -0.456553322 | 0.2   | 0.297 | 5.86E-21 | 1.4 |
| ELK3      | 2.49E-25 | -0.392959132 | 0.117 | 0.207 | 6.00E-21 | 1.4 |
| RPL35A    | 2.85E-25 | -0.223268114 | 0.971 | 0.985 | 6.86E-21 | 1.4 |
| LINC01235 | 2.96E-25 | 0.240322406  | 0.272 | 0.17  | 7.13E-21 | 1.4 |
| MSI2      | 3.18E-25 | 0.254201507  | 0.273 | 0.171 | 7.68E-21 | 1.4 |
| ZNF248    | 3.30E-25 | 0.193665549  | 0.09  | 0.036 | 7.96E-21 | 1.4 |
| RNF144B   | 3.39E-25 | 0.303791737  | 0.44  | 0.318 | 8.17E-21 | 1.4 |
| AMY2B     | 3.89E-25 | 0.140307604  | 0.078 | 0.029 | 9.37E-21 | 1.4 |
| AC007566  | 4.20E-25 | 0.146112734  | 0.077 | 0.028 | 1.01E-20 | 1.4 |
| CAMK1D    | 4.33E-25 | -0.460767895 | 0.088 | 0.172 | 1.04E-20 | 1.4 |
| VTI1A     | 4.43E-25 | 0.222814546  | 0.239 | 0.143 | 1.07E-20 | 1.4 |
| RCC1      | 4.66E-25 | -0.467911249 | 0.289 | 0.378 | 1.12E-20 | 1.4 |
| ARF6      | 5.00E-25 | -0.413988479 | 0.123 | 0.212 | 1.21E-20 | 1.4 |
| MEAF6     | 6.63E-25 | -0.400056086 | 0.086 | 0.169 | 1.60E-20 | 1.4 |
| ACVR2A    | 6.79E-25 | 0.194421705  | 0.089 | 0.036 | 1.64E-20 | 1.4 |
| CADM1     | 6.86E-25 | 0.25263292   | 0.139 | 0.069 | 1.65E-20 | 1.4 |
| HLCS      | 7.00E-25 | 0.231988243  | 0.137 | 0.067 | 1.69E-20 | 1.4 |
| C1RL-AS1  | 7.16E-25 | 0.153491172  | 0.06  | 0.019 | 1.73E-20 | 1.4 |
| ANXA11    | 7.36E-25 | -0.442001755 | 0.176 | 0.27  | 1.77E-20 | 1.4 |
| CTA-292E1 | 7.65E-25 | 0.225034878  | 0.17  | 0.091 | 1.84E-20 | 1.4 |

|           |          |              |       |       |          |     |
|-----------|----------|--------------|-------|-------|----------|-----|
| USP33     | 8.62E-25 | 0.2502686    | 0.299 | 0.192 | 2.08E-20 | 1.4 |
| RNF170    | 8.72E-25 | 0.170592908  | 0.098 | 0.041 | 2.10E-20 | 1.4 |
| RHOA      | 9.00E-25 | -0.481756968 | 0.364 | 0.441 | 2.17E-20 | 1.4 |
| MTERF1    | 9.93E-25 | 0.191231641  | 0.128 | 0.061 | 2.39E-20 | 1.4 |
| THBS1     | 1.04E-24 | -0.396015604 | 0.027 | 0.09  | 2.50E-20 | 1.4 |
| BTBD9     | 1.19E-24 | 0.270274214  | 0.272 | 0.171 | 2.88E-20 | 1.4 |
| ROCK2     | 1.28E-24 | 0.280905337  | 0.344 | 0.233 | 3.08E-20 | 1.4 |
| NACA      | 1.39E-24 | -0.214712161 | 0.953 | 0.966 | 3.36E-20 | 1.4 |
| CEBPB     | 1.49E-24 | 0.203167095  | 0.212 | 0.123 | 3.60E-20 | 1.4 |
| C5orf17   | 1.62E-24 | 0.26195418   | 0.11  | 0.049 | 3.90E-20 | 1.4 |
| NCEH1     | 1.74E-24 | 0.335105221  | 0.298 | 0.193 | 4.19E-20 | 1.4 |
| TAF1      | 1.74E-24 | 0.212809581  | 0.191 | 0.107 | 4.20E-20 | 1.4 |
| SHROOM3   | 1.81E-24 | -0.477459848 | 0.47  | 0.542 | 4.37E-20 | 1.4 |
| INVS      | 1.82E-24 | 0.244978777  | 0.195 | 0.111 | 4.39E-20 | 1.4 |
| ATP1B1    | 1.83E-24 | -0.506744462 | 0.674 | 0.724 | 4.42E-20 | 1.4 |
| MAP2      | 1.84E-24 | -0.455362658 | 0.104 | 0.19  | 4.45E-20 | 1.4 |
| C16orf45  | 2.14E-24 | 0.195987843  | 0.102 | 0.044 | 5.16E-20 | 1.4 |
| PDSS2     | 2.14E-24 | 0.261196988  | 0.2   | 0.114 | 5.17E-20 | 1.4 |
| PBRM1     | 2.26E-24 | 0.265281308  | 0.271 | 0.171 | 5.45E-20 | 1.4 |
| RP11-367G | 2.37E-24 | 0.112131041  | 0.043 | 0.01  | 5.71E-20 | 1.4 |
| NIFK-AS1  | 2.37E-24 | 0.154969203  | 0.079 | 0.03  | 5.72E-20 | 1.4 |
| ARHGEF28  | 2.39E-24 | -0.679041462 | 0.324 | 0.405 | 5.76E-20 | 1.4 |
| SIDT1     | 2.42E-24 | 0.125107544  | 0.039 | 0.008 | 5.83E-20 | 1.4 |
| CUL5      | 2.63E-24 | 0.24136928   | 0.195 | 0.112 | 6.35E-20 | 1.4 |
| TPM4      | 2.69E-24 | -0.405025277 | 0.44  | 0.517 | 6.49E-20 | 1.4 |
| YARS      | 2.70E-24 | -0.392005712 | 0.209 | 0.305 | 6.51E-20 | 1.4 |
| GRIP1     | 2.83E-24 | 0.24550475   | 0.275 | 0.173 | 6.83E-20 | 1.4 |
| FBXL4     | 2.84E-24 | 0.185128336  | 0.136 | 0.067 | 6.85E-20 | 1.4 |
| CEBPD     | 2.91E-24 | 0.221281642  | 0.3   | 0.193 | 7.03E-20 | 1.4 |
| SLC39A14  | 3.02E-24 | 0.271508846  | 0.438 | 0.311 | 7.29E-20 | 1.4 |
| DIRC2     | 3.31E-24 | 0.193557718  | 0.116 | 0.053 | 7.98E-20 | 1.4 |
| RCAN1     | 3.37E-24 | -0.392675356 | 0.607 | 0.683 | 8.12E-20 | 1.4 |
| TEAD2     | 3.43E-24 | 0.180651681  | 0.12  | 0.057 | 8.26E-20 | 1.4 |
| TRMT1L    | 3.77E-24 | 0.116183602  | 0.054 | 0.016 | 9.10E-20 | 1.4 |
| PGM1      | 3.81E-24 | 0.193191046  | 0.181 | 0.1   | 9.20E-20 | 1.4 |
| ZBED5     | 3.83E-24 | 0.19292129   | 0.125 | 0.06  | 9.23E-20 | 1.4 |
| CH507-528 | 3.86E-24 | 0.128960651  | 0.063 | 0.02  | 9.30E-20 | 1.4 |
| MFS11     | 4.12E-24 | 0.184266812  | 0.119 | 0.056 | 9.93E-20 | 1.4 |
| SSR2      | 4.25E-24 | -0.313397963 | 0.759 | 0.766 | 1.02E-19 | 1.4 |
| GOLGA4    | 4.27E-24 | -0.419750418 | 0.626 | 0.659 | 1.03E-19 | 1.4 |
| MXD1      | 4.40E-24 | -0.431797109 | 0.097 | 0.182 | 1.06E-19 | 1.4 |
| ACTN4     | 4.95E-24 | -0.502478234 | 0.267 | 0.359 | 1.19E-19 | 1.4 |
| RPL21     | 5.30E-24 | -0.201902751 | 0.948 | 0.962 | 1.28E-19 | 1.4 |
| SGMS1     | 5.76E-24 | 0.191879628  | 0.363 | 0.243 | 1.39E-19 | 1.4 |
| FEM1B     | 5.78E-24 | -0.332169987 | 0.068 | 0.146 | 1.39E-19 | 1.4 |
| ZER1      | 5.80E-24 | 0.216408457  | 0.161 | 0.086 | 1.40E-19 | 1.4 |
| SIPA1L3   | 6.20E-24 | 0.267590527  | 0.248 | 0.155 | 1.50E-19 | 1.4 |

|            |          |              |       |       |          |     |
|------------|----------|--------------|-------|-------|----------|-----|
| NTN1       | 6.51E-24 | 0.225576403  | 0.22  | 0.131 | 1.57E-19 | 1.4 |
| FAM120C    | 6.55E-24 | 0.19047383   | 0.095 | 0.04  | 1.58E-19 | 1.4 |
| TNKS       | 6.72E-24 | 0.224549694  | 0.359 | 0.242 | 1.62E-19 | 1.4 |
| ZNF780B    | 6.88E-24 | 0.14548286   | 0.077 | 0.029 | 1.66E-19 | 1.4 |
| DPH6       | 7.45E-24 | 0.21957369   | 0.115 | 0.053 | 1.80E-19 | 1.4 |
| ZNF708     | 7.74E-24 | 0.288911367  | 0.142 | 0.072 | 1.87E-19 | 1.4 |
| UACA       | 7.97E-24 | 0.251498917  | 0.235 | 0.143 | 1.92E-19 | 1.4 |
| MUC16      | 8.08E-24 | 0.222817614  | 0.091 | 0.038 | 1.95E-19 | 1.4 |
| NCOA2      | 8.79E-24 | 0.229185955  | 0.599 | 0.463 | 2.12E-19 | 1.4 |
| SNX29      | 8.96E-24 | 0.265061126  | 0.16  | 0.086 | 2.16E-19 | 1.4 |
| CMC1       | 9.59E-24 | 0.167893206  | 0.089 | 0.036 | 2.31E-19 | 1.4 |
| SLC9A7     | 1.02E-23 | -0.506442158 | 0.223 | 0.314 | 2.46E-19 | 1.4 |
| RHBDD1     | 1.03E-23 | 0.213910817  | 0.188 | 0.106 | 2.48E-19 | 1.4 |
| TPM1       | 1.03E-23 | 0.259969898  | 0.693 | 0.574 | 2.49E-19 | 1.4 |
| SMAD1      | 1.09E-23 | 0.1832332    | 0.138 | 0.07  | 2.62E-19 | 1.4 |
| THUMPD3-   | 1.12E-23 | 0.204013121  | 0.396 | 0.273 | 2.70E-19 | 1.4 |
| ZNF44      | 1.13E-23 | 0.145315853  | 0.095 | 0.04  | 2.73E-19 | 1.4 |
| DLEU1      | 1.14E-23 | 0.19828443   | 0.226 | 0.135 | 2.75E-19 | 1.4 |
| LRRC4C     | 1.18E-23 | 0.199170083  | 0.099 | 0.042 | 2.83E-19 | 1.4 |
| PRLR       | 1.19E-23 | 0.248690979  | 0.194 | 0.111 | 2.87E-19 | 1.4 |
| TFAP2C     | 1.21E-23 | 0.210913154  | 0.183 | 0.103 | 2.93E-19 | 1.4 |
| SP110      | 1.26E-23 | 0.12488863   | 0.05  | 0.014 | 3.03E-19 | 1.4 |
| OTUD6B-A!  | 1.40E-23 | 0.19616365   | 0.274 | 0.172 | 3.37E-19 | 1.4 |
| NFIC       | 1.45E-23 | 0.250920304  | 0.242 | 0.149 | 3.50E-19 | 1.4 |
| ZNF586     | 1.48E-23 | 0.202785262  | 0.154 | 0.081 | 3.57E-19 | 1.4 |
| TBC1D14    | 1.50E-23 | 0.20752982   | 0.124 | 0.06  | 3.62E-19 | 1.4 |
| STOX2      | 1.51E-23 | 0.239342917  | 0.247 | 0.154 | 3.63E-19 | 1.4 |
| GTF2IRD2   | 1.74E-23 | 0.221976691  | 0.142 | 0.073 | 4.19E-19 | 1.4 |
| COBLL1     | 1.83E-23 | 0.227786649  | 0.191 | 0.109 | 4.42E-19 | 1.4 |
| IFT43      | 1.94E-23 | 0.200756876  | 0.134 | 0.066 | 4.67E-19 | 1.4 |
| USP34      | 1.96E-23 | 0.216415711  | 0.695 | 0.547 | 4.73E-19 | 1.4 |
| GS1-24F4.2 | 2.39E-23 | 0.29460106   | 0.163 | 0.089 | 5.76E-19 | 1.4 |
| ZNFX1      | 2.50E-23 | 0.229331922  | 0.194 | 0.112 | 6.03E-19 | 1.4 |
| ELL2       | 2.61E-23 | -0.469677476 | 0.652 | 0.692 | 6.30E-19 | 1.4 |
| ITSN2      | 2.68E-23 | 0.275171381  | 0.412 | 0.293 | 6.47E-19 | 1.4 |
| TRIM13     | 2.82E-23 | 0.147080053  | 0.136 | 0.068 | 6.79E-19 | 1.4 |
| KPNA3      | 2.87E-23 | 0.197741139  | 0.169 | 0.093 | 6.93E-19 | 1.4 |
| NRG3       | 2.88E-23 | 0.250033015  | 0.151 | 0.08  | 6.96E-19 | 1.4 |
| IL4R       | 3.03E-23 | 0.190439007  | 0.198 | 0.114 | 7.31E-19 | 1.4 |
| PARVA      | 3.22E-23 | 0.224038623  | 0.206 | 0.121 | 7.77E-19 | 1.4 |
| ATP9B      | 3.27E-23 | 0.156128574  | 0.128 | 0.062 | 7.88E-19 | 1.4 |
| TCTN3      | 3.28E-23 | 0.139171861  | 0.072 | 0.026 | 7.90E-19 | 1.4 |
| PTCH1      | 3.63E-23 | 0.11157874   | 0.038 | 0.008 | 8.75E-19 | 1.4 |
| RPS4X      | 3.79E-23 | -0.181836147 | 0.973 | 0.988 | 9.15E-19 | 1.4 |
| HIBCH      | 3.82E-23 | 0.234015359  | 0.209 | 0.124 | 9.21E-19 | 1.4 |
| FAM179B    | 3.84E-23 | 0.195030409  | 0.126 | 0.062 | 9.26E-19 | 1.4 |
| SENP5      | 4.09E-23 | 0.224738743  | 0.282 | 0.181 | 9.86E-19 | 1.4 |

|           |          |              |       |       |          |     |
|-----------|----------|--------------|-------|-------|----------|-----|
| YIPF4     | 4.10E-23 | 0.20463616   | 0.147 | 0.077 | 9.88E-19 | 1.4 |
| KDM3B     | 4.34E-23 | 0.191266696  | 0.246 | 0.153 | 1.05E-18 | 1.4 |
| GALK2     | 4.51E-23 | 0.202021401  | 0.124 | 0.06  | 1.09E-18 | 1.4 |
| PCM1      | 4.89E-23 | 0.254767357  | 0.26  | 0.166 | 1.18E-18 | 1.4 |
| COMMD10   | 5.67E-23 | 0.227125671  | 0.283 | 0.185 | 1.37E-18 | 1.4 |
| TYW1      | 6.34E-23 | 0.154062894  | 0.132 | 0.065 | 1.53E-18 | 1.4 |
| ARHGEF9   | 6.66E-23 | 0.155819615  | 0.087 | 0.036 | 1.61E-18 | 1.4 |
| IFITM2    | 6.91E-23 | 0.13770132   | 0.083 | 0.033 | 1.67E-18 | 1.4 |
| PURA      | 7.55E-23 | 0.149526099  | 0.11  | 0.051 | 1.82E-18 | 1.4 |
| SRSF3     | 7.61E-23 | -0.431574126 | 0.555 | 0.615 | 1.84E-18 | 1.4 |
| NSMCE1    | 7.66E-23 | 0.193700305  | 0.172 | 0.096 | 1.85E-18 | 1.4 |
| POLR2F    | 8.09E-23 | 0.210236407  | 0.115 | 0.055 | 1.95E-18 | 1.4 |
| KCND2     | 8.93E-23 | 0.407335847  | 0.137 | 0.071 | 2.15E-18 | 1.4 |
| DMXL1     | 9.51E-23 | 0.171564932  | 0.18  | 0.101 | 2.29E-18 | 1.4 |
| ERCC6L2   | 9.55E-23 | 0.194315483  | 0.139 | 0.071 | 2.30E-18 | 1.4 |
| PELI2     | 9.60E-23 | 0.236880658  | 0.139 | 0.072 | 2.31E-18 | 1.4 |
| TNRC6B    | 1.11E-22 | 0.228473328  | 0.52  | 0.382 | 2.68E-18 | 1.4 |
| IL12RB1   | 1.13E-22 | 0.123024332  | 0.066 | 0.023 | 2.72E-18 | 1.4 |
| C5orf28   | 1.20E-22 | 0.234110242  | 0.249 | 0.156 | 2.90E-18 | 1.4 |
| SLC18B1   | 1.46E-22 | 0.24189565   | 0.274 | 0.175 | 3.52E-18 | 1.4 |
| NUB1      | 1.50E-22 | 0.31433404   | 0.374 | 0.263 | 3.62E-18 | 1.4 |
| TPI1      | 1.56E-22 | -0.40907452  | 0.306 | 0.395 | 3.76E-18 | 1.4 |
| MED13L    | 1.68E-22 | 0.272738302  | 0.763 | 0.647 | 4.05E-18 | 1.4 |
| TAPT1-AS1 | 1.69E-22 | 0.175802746  | 0.109 | 0.05  | 4.08E-18 | 1.4 |
| WDR7      | 1.79E-22 | 0.172974435  | 0.091 | 0.038 | 4.32E-18 | 1.4 |
| TLK1      | 1.84E-22 | 0.238816618  | 0.28  | 0.182 | 4.45E-18 | 1.4 |
| VRK2      | 1.85E-22 | 0.209860815  | 0.251 | 0.156 | 4.46E-18 | 1.4 |
| DPH6-AS1  | 1.95E-22 | 0.125986577  | 0.05  | 0.015 | 4.71E-18 | 1.4 |
| VPS54     | 2.05E-22 | 0.24002054   | 0.308 | 0.204 | 4.95E-18 | 1.4 |
| MCTP2     | 2.09E-22 | 0.228286275  | 0.212 | 0.127 | 5.05E-18 | 1.4 |
| VPS45     | 2.22E-22 | 0.206371876  | 0.138 | 0.071 | 5.35E-18 | 1.4 |
| C11orf54  | 2.51E-22 | 0.198079508  | 0.152 | 0.082 | 6.05E-18 | 1.4 |
| SOS2      | 2.74E-22 | 0.204325049  | 0.567 | 0.434 | 6.60E-18 | 1.4 |
| RP11-16D2 | 2.76E-22 | 0.142503248  | 0.046 | 0.013 | 6.65E-18 | 1.4 |
| NMRK1     | 3.13E-22 | 0.122244481  | 0.06  | 0.02  | 7.55E-18 | 1.4 |
| NHLRC2    | 3.16E-22 | 0.164878627  | 0.108 | 0.05  | 7.62E-18 | 1.4 |
| RP1-122P2 | 3.56E-22 | 0.166761273  | 0.067 | 0.024 | 8.59E-18 | 1.4 |
| NUP107    | 3.61E-22 | 0.211136345  | 0.216 | 0.131 | 8.72E-18 | 1.4 |
| ARMT1     | 3.63E-22 | 0.174901922  | 0.14  | 0.072 | 8.76E-18 | 1.4 |
| ST3GAL6   | 4.70E-22 | 0.191001288  | 0.176 | 0.099 | 1.13E-17 | 1.4 |
| WBP1L     | 4.88E-22 | 0.179886536  | 0.105 | 0.049 | 1.18E-17 | 1.4 |
| AP1S3     | 4.90E-22 | -0.283644188 | 0.03  | 0.09  | 1.18E-17 | 1.4 |
| MAPRE1    | 5.37E-22 | -0.33707737  | 0.099 | 0.179 | 1.29E-17 | 1.4 |
| AMOT      | 5.37E-22 | 0.146264083  | 0.089 | 0.038 | 1.29E-17 | 1.4 |
| RPL31     | 5.71E-22 | -0.204268014 | 0.951 | 0.97  | 1.38E-17 | 1.4 |
| KIF9-AS1  | 5.84E-22 | 0.182219031  | 0.085 | 0.035 | 1.41E-17 | 1.4 |
| CR1L      | 6.29E-22 | 0.13960654   | 0.069 | 0.025 | 1.52E-17 | 1.4 |



|           |          |              |       |       |          |     |
|-----------|----------|--------------|-------|-------|----------|-----|
| DRAM1     | 6.46E-22 | 0.2508361    | 0.234 | 0.146 | 1.56E-17 | 1.4 |
| PRPF3     | 6.48E-22 | 0.212168915  | 0.177 | 0.101 | 1.56E-17 | 1.4 |
| MKL1      | 6.50E-22 | -0.542978313 | 0.435 | 0.507 | 1.57E-17 | 1.4 |
| PRKAG2    | 6.55E-22 | 0.283498793  | 0.23  | 0.144 | 1.58E-17 | 1.4 |
| RP11-711K | 6.80E-22 | 0.208236001  | 0.102 | 0.047 | 1.64E-17 | 1.4 |
| ANKRD13C  | 7.04E-22 | 0.223465572  | 0.181 | 0.104 | 1.70E-17 | 1.4 |
| AMD1      | 7.13E-22 | -0.429881093 | 0.179 | 0.265 | 1.72E-17 | 1.4 |
| ZNF133    | 7.32E-22 | 0.125147165  | 0.067 | 0.024 | 1.76E-17 | 1.4 |
| RIOK3     | 7.46E-22 | -0.461786709 | 0.236 | 0.319 | 1.80E-17 | 1.4 |
| HP1BP3    | 7.47E-22 | 0.21569178   | 0.265 | 0.172 | 1.80E-17 | 1.4 |
| PLEKHA6   | 7.64E-22 | -0.219698602 | 0.916 | 0.926 | 1.84E-17 | 1.4 |
| MLLT6     | 7.74E-22 | 0.201983023  | 0.121 | 0.06  | 1.87E-17 | 1.4 |
| STPG2     | 9.27E-22 | 0.210934216  | 0.096 | 0.043 | 2.23E-17 | 1.4 |
| MYC       | 9.90E-22 | -0.377549216 | 0.091 | 0.169 | 2.39E-17 | 1.4 |
| DDIT3     | 1.01E-21 | -0.459141699 | 0.072 | 0.144 | 2.43E-17 | 1.4 |
| ATPAF1    | 1.01E-21 | 0.114776483  | 0.056 | 0.018 | 2.44E-17 | 1.4 |
| BCL6      | 1.07E-21 | 0.292577808  | 0.427 | 0.31  | 2.58E-17 | 1.4 |
| AFF1      | 1.08E-21 | 0.178571202  | 0.384 | 0.266 | 2.60E-17 | 1.4 |
| CKAP4     | 1.11E-21 | 0.218707356  | 0.23  | 0.143 | 2.68E-17 | 1.4 |
| SECISBP2  | 1.15E-21 | 0.175845569  | 0.126 | 0.063 | 2.76E-17 | 1.4 |
| ANXA5     | 1.20E-21 | -0.473726586 | 0.187 | 0.274 | 2.88E-17 | 1.4 |
| BPI       | 1.21E-21 | 0.155308217  | 0.077 | 0.031 | 2.92E-17 | 1.4 |
| SWAP70    | 1.30E-21 | -0.421530833 | 0.24  | 0.327 | 3.14E-17 | 1.4 |
| SETD7     | 1.32E-21 | 0.221361362  | 0.16  | 0.089 | 3.18E-17 | 1.4 |
| LIMS1     | 1.36E-21 | -0.534552234 | 0.256 | 0.338 | 3.27E-17 | 1.4 |
| RAB27A    | 1.59E-21 | 0.163910925  | 0.12  | 0.059 | 3.83E-17 | 1.4 |
| TJP3      | 1.62E-21 | 0.134525659  | 0.066 | 0.024 | 3.90E-17 | 1.4 |
| ZNF106    | 1.65E-21 | 0.173144416  | 0.175 | 0.099 | 3.97E-17 | 1.4 |
| ARHGAP17  | 1.83E-21 | -0.464577301 | 0.157 | 0.24  | 4.41E-17 | 1.4 |
| SLC1A3    | 1.98E-21 | 0.161162276  | 0.09  | 0.039 | 4.77E-17 | 1.4 |
| RPS3A     | 2.11E-21 | -0.203042123 | 0.942 | 0.956 | 5.08E-17 | 1.4 |
| PLS3      | 2.27E-21 | -0.28940504  | 0.059 | 0.129 | 5.48E-17 | 1.4 |
| LPIN1     | 2.50E-21 | -0.518158239 | 0.283 | 0.364 | 6.02E-17 | 1.4 |
| RAB8B     | 2.52E-21 | -0.392689755 | 0.107 | 0.186 | 6.07E-17 | 1.4 |
| FIGN      | 2.69E-21 | 0.2268025    | 0.191 | 0.113 | 6.50E-17 | 1.4 |
| NHLRC3    | 2.70E-21 | 0.110833163  | 0.049 | 0.015 | 6.51E-17 | 1.4 |
| CNTNAP3   | 2.92E-21 | 0.199306076  | 0.102 | 0.047 | 7.03E-17 | 1.4 |
| PPP2R5A   | 2.95E-21 | 0.211813486  | 0.209 | 0.127 | 7.11E-17 | 1.4 |
| CCT5      | 3.04E-21 | -0.410412369 | 0.313 | 0.398 | 7.34E-17 | 1.4 |
| PCLO      | 3.08E-21 | 0.206998361  | 0.08  | 0.033 | 7.42E-17 | 1.4 |
| HNMT      | 3.33E-21 | 0.215032089  | 0.301 | 0.2   | 8.03E-17 | 1.4 |
| RPL30     | 3.34E-21 | -0.18172914  | 0.969 | 0.984 | 8.06E-17 | 1.4 |
| KDM5B     | 3.36E-21 | -0.438175255 | 0.533 | 0.567 | 8.11E-17 | 1.4 |
| GALNT11   | 3.42E-21 | 0.190372506  | 0.131 | 0.068 | 8.26E-17 | 1.4 |
| MTR       | 3.67E-21 | 0.18713407   | 0.113 | 0.055 | 8.84E-17 | 1.4 |
| XPO4      | 3.67E-21 | 0.187258285  | 0.195 | 0.115 | 8.85E-17 | 1.4 |
| ZNF37A    | 4.13E-21 | 0.178894215  | 0.141 | 0.075 | 9.97E-17 | 1.4 |

|           |          |              |       |       |          |     |
|-----------|----------|--------------|-------|-------|----------|-----|
| ITM2B     | 4.14E-21 | 0.222813637  | 0.331 | 0.227 | 9.98E-17 | 1.4 |
| ZNF302    | 4.18E-21 | 0.115799126  | 0.062 | 0.022 | 1.01E-16 | 1.4 |
| PLGRKT    | 4.46E-21 | 0.147050423  | 0.081 | 0.033 | 1.08E-16 | 1.4 |
| SUPT20H   | 4.76E-21 | 0.171889578  | 0.129 | 0.066 | 1.15E-16 | 1.4 |
| RP11-514P | 4.79E-21 | 0.125181801  | 0.071 | 0.027 | 1.15E-16 | 1.4 |
| R3HDM1    | 4.96E-21 | 0.165440307  | 0.101 | 0.047 | 1.19E-16 | 1.4 |
| PHKB      | 5.03E-21 | 0.221708702  | 0.265 | 0.173 | 1.21E-16 | 1.4 |
| YWHAQ     | 5.11E-21 | -0.43958891  | 0.316 | 0.396 | 1.23E-16 | 1.4 |
| NNT       | 5.35E-21 | 0.198559099  | 0.154 | 0.085 | 1.29E-16 | 1.4 |
| HSPD1     | 6.05E-21 | 0.252878317  | 0.418 | 0.308 | 1.46E-16 | 1.4 |
| LITAF     | 6.17E-21 | 0.225008488  | 0.592 | 0.464 | 1.49E-16 | 1.4 |
| RP11-66B2 | 6.30E-21 | 0.132252333  | 0.062 | 0.022 | 1.52E-16 | 1.4 |
| NT5C2     | 7.48E-21 | 0.236296859  | 0.462 | 0.344 | 1.80E-16 | 1.4 |
| ACP6      | 7.77E-21 | 0.106888042  | 0.049 | 0.015 | 1.87E-16 | 1.4 |
| ANKRD36C  | 7.79E-21 | -0.456152489 | 0.508 | 0.578 | 1.88E-16 | 1.4 |
| SLC25A3   | 8.79E-21 | 0.196854709  | 0.266 | 0.172 | 2.12E-16 | 1.4 |
| SLC38A6   | 9.47E-21 | 0.132734888  | 0.071 | 0.028 | 2.28E-16 | 1.4 |
| GATAD1    | 9.77E-21 | 0.133947638  | 0.073 | 0.029 | 2.36E-16 | 1.4 |
| MTERF4    | 1.01E-20 | 0.173971832  | 0.133 | 0.07  | 2.45E-16 | 1.4 |
| UFL1      | 1.07E-20 | 0.180139899  | 0.107 | 0.051 | 2.59E-16 | 1.4 |
| CBR4      | 1.14E-20 | 0.182471372  | 0.347 | 0.238 | 2.76E-16 | 1.4 |
| MIS18BP1  | 1.18E-20 | 0.205015721  | 0.186 | 0.11  | 2.86E-16 | 1.4 |
| LURAP1L   | 1.22E-20 | -0.370735011 | 0.159 | 0.244 | 2.94E-16 | 1.4 |
| GOSR1     | 1.32E-20 | 0.17784048   | 0.237 | 0.149 | 3.19E-16 | 1.4 |
| MACROD2   | 1.39E-20 | 0.293816482  | 0.336 | 0.236 | 3.35E-16 | 1.4 |
| FAM78B    | 1.40E-20 | 0.181938854  | 0.117 | 0.058 | 3.38E-16 | 1.4 |
| UBXN4     | 1.41E-20 | 0.225217099  | 0.357 | 0.252 | 3.39E-16 | 1.4 |
| CAMKMT    | 1.52E-20 | 0.233797386  | 0.225 | 0.14  | 3.66E-16 | 1.4 |
| DENND4C   | 1.54E-20 | 0.219871019  | 0.286 | 0.19  | 3.71E-16 | 1.4 |
| RPS19BP1  | 1.57E-20 | 0.141918172  | 0.051 | 0.016 | 3.79E-16 | 1.4 |
| KIAA1109  | 1.59E-20 | 0.192272855  | 0.176 | 0.102 | 3.84E-16 | 1.4 |
| CECR7     | 1.66E-20 | 0.17850277   | 0.134 | 0.07  | 4.00E-16 | 1.4 |
| MAL2      | 1.73E-20 | -0.411168183 | 0.185 | 0.269 | 4.16E-16 | 1.4 |
| FAM217B   | 1.78E-20 | 0.112203016  | 0.071 | 0.028 | 4.29E-16 | 1.4 |
| GNAQ      | 1.89E-20 | 0.208655381  | 0.398 | 0.283 | 4.55E-16 | 1.4 |
| SPDYE16   | 1.99E-20 | 0.184259786  | 0.148 | 0.081 | 4.79E-16 | 1.4 |
| CCDC64    | 2.03E-20 | 0.154554009  | 0.063 | 0.023 | 4.89E-16 | 1.4 |
| ZNF33B    | 2.06E-20 | 0.20258046   | 0.251 | 0.162 | 4.96E-16 | 1.4 |
| ZNF274    | 2.08E-20 | 0.178014771  | 0.133 | 0.07  | 5.02E-16 | 1.4 |
| ZC3H13    | 2.08E-20 | 0.199729211  | 0.247 | 0.158 | 5.02E-16 | 1.4 |
| ZBTB8OS   | 2.12E-20 | 0.193727599  | 0.195 | 0.118 | 5.10E-16 | 1.4 |
| GPBP1     | 2.19E-20 | -0.38165135  | 0.593 | 0.626 | 5.29E-16 | 1.4 |
| RASSF3    | 2.36E-20 | -0.336201912 | 0.094 | 0.169 | 5.68E-16 | 1.4 |
| MLH3      | 2.45E-20 | 0.175353683  | 0.15  | 0.083 | 5.92E-16 | 1.4 |
| ARL15     | 2.48E-20 | 0.23694511   | 0.278 | 0.185 | 5.98E-16 | 1.4 |
| C5orf56   | 2.62E-20 | 0.177584269  | 0.181 | 0.105 | 6.32E-16 | 1.4 |
| EML5      | 2.70E-20 | 0.204707406  | 0.16  | 0.09  | 6.52E-16 | 1.4 |

|           |          |              |       |       |          |     |
|-----------|----------|--------------|-------|-------|----------|-----|
| STRBP     | 2.71E-20 | 0.206116081  | 0.258 | 0.167 | 6.53E-16 | 1.4 |
| KLK7      | 2.75E-20 | -0.200689782 | 0.007 | 0.049 | 6.62E-16 | 1.4 |
| KMT5B     | 3.10E-20 | 0.193587614  | 0.224 | 0.139 | 7.46E-16 | 1.4 |
| VPS50     | 3.11E-20 | 0.160172599  | 0.097 | 0.045 | 7.50E-16 | 1.4 |
| RP11-499P | 3.35E-20 | 0.133549819  | 0.071 | 0.028 | 8.07E-16 | 1.4 |
| LINC01191 | 3.83E-20 | 0.13563227   | 0.094 | 0.043 | 9.23E-16 | 1.4 |
| CLEC16A   | 4.24E-20 | 0.176083652  | 0.222 | 0.137 | 1.02E-15 | 1.4 |
| MIR3142H  | 4.52E-20 | 0.101734142  | 0.047 | 0.014 | 1.09E-15 | 1.4 |
| RIC1      | 4.61E-20 | 0.175722298  | 0.161 | 0.091 | 1.11E-15 | 1.4 |
| PRKRIP1   | 5.23E-20 | 0.18210266   | 0.199 | 0.12  | 1.26E-15 | 1.4 |
| ELF1      | 5.25E-20 | -0.421076883 | 0.393 | 0.463 | 1.27E-15 | 1.4 |
| IDE       | 5.37E-20 | 0.167489009  | 0.12  | 0.061 | 1.29E-15 | 1.4 |
| CYFIP1    | 5.68E-20 | 0.169939287  | 0.179 | 0.104 | 1.37E-15 | 1.4 |
| NPAS2     | 5.78E-20 | 0.232511238  | 0.583 | 0.451 | 1.39E-15 | 1.4 |
| TMEM108   | 5.89E-20 | 0.183844777  | 0.042 | 0.012 | 1.42E-15 | 1.4 |
| SPOP      | 6.15E-20 | 0.145442151  | 0.137 | 0.073 | 1.48E-15 | 1.4 |
| PTK2B     | 6.18E-20 | 0.156299193  | 0.096 | 0.045 | 1.49E-15 | 1.4 |
| ROR1      | 6.52E-20 | 0.19413153   | 0.069 | 0.027 | 1.57E-15 | 1.4 |
| DSG3      | 6.55E-20 | -0.696081309 | 0.029 | 0.084 | 1.58E-15 | 1.4 |
| IKKB      | 6.77E-20 | 0.197499905  | 0.17  | 0.098 | 1.63E-15 | 1.4 |
| FARS2     | 6.78E-20 | 0.195191243  | 0.129 | 0.068 | 1.63E-15 | 1.4 |
| CLCN3     | 7.04E-20 | 0.199438278  | 0.253 | 0.165 | 1.70E-15 | 1.4 |
| SFT2D2    | 7.07E-20 | 0.224420683  | 0.297 | 0.201 | 1.70E-15 | 1.4 |
| PLD3      | 7.18E-20 | 0.147504885  | 0.079 | 0.033 | 1.73E-15 | 1.4 |
| SUMO1     | 7.38E-20 | -0.353730097 | 0.495 | 0.545 | 1.78E-15 | 1.4 |
| XRN1      | 7.43E-20 | 0.221719939  | 0.425 | 0.31  | 1.79E-15 | 1.4 |
| RBFOX2    | 7.64E-20 | -0.294700993 | 0.953 | 0.968 | 1.84E-15 | 1.4 |
| ZNF260    | 7.73E-20 | 0.141084521  | 0.138 | 0.074 | 1.86E-15 | 1.4 |
| PCMTD1    | 8.24E-20 | 0.195841405  | 0.397 | 0.285 | 1.99E-15 | 1.4 |
| AHCYL2    | 8.48E-20 | 0.186400232  | 0.126 | 0.065 | 2.04E-15 | 1.4 |
| RFX3      | 8.51E-20 | 0.214301151  | 0.222 | 0.139 | 2.05E-15 | 1.4 |
| ADAM10    | 8.56E-20 | 0.219091218  | 0.312 | 0.216 | 2.06E-15 | 1.4 |
| IL34      | 8.69E-20 | 0.199757769  | 0.228 | 0.142 | 2.10E-15 | 1.4 |
| ESR2      | 8.87E-20 | 0.186606033  | 0.165 | 0.095 | 2.14E-15 | 1.4 |
| TMEM245   | 9.11E-20 | 0.168244059  | 0.148 | 0.082 | 2.20E-15 | 1.4 |
| AASDH     | 9.60E-20 | 0.133849453  | 0.093 | 0.043 | 2.32E-15 | 1.4 |
| PPP2R1B   | 1.02E-19 | 0.170968105  | 0.154 | 0.086 | 2.45E-15 | 1.4 |
| OTUD7B    | 1.05E-19 | -0.361891626 | 0.113 | 0.189 | 2.52E-15 | 1.4 |
| POLK      | 1.06E-19 | 0.175480503  | 0.198 | 0.119 | 2.55E-15 | 1.4 |
| STAT5B    | 1.06E-19 | 0.204760622  | 0.25  | 0.162 | 2.56E-15 | 1.4 |
| SPATA6    | 1.10E-19 | 0.150587726  | 0.071 | 0.029 | 2.64E-15 | 1.4 |
| MFS6      | 1.14E-19 | 0.183679611  | 0.135 | 0.073 | 2.75E-15 | 1.4 |
| DDR2      | 1.18E-19 | 0.233014485  | 0.17  | 0.099 | 2.85E-15 | 1.4 |
| LHPP      | 1.20E-19 | 0.109613814  | 0.046 | 0.014 | 2.89E-15 | 1.4 |
| PARG      | 1.21E-19 | 0.166490743  | 0.14  | 0.076 | 2.92E-15 | 1.4 |
| ERO1A     | 1.29E-19 | -0.462489183 | 0.293 | 0.372 | 3.12E-15 | 1.4 |
| AGO4      | 1.38E-19 | 0.169345847  | 0.156 | 0.088 | 3.33E-15 | 1.4 |

|           |          |              |       |       |          |     |
|-----------|----------|--------------|-------|-------|----------|-----|
| PHC2      | 1.43E-19 | 0.174911741  | 0.137 | 0.074 | 3.44E-15 | 1.4 |
| KLHDC1    | 1.52E-19 | 0.135342308  | 0.059 | 0.021 | 3.67E-15 | 1.4 |
| ATP13A3   | 1.58E-19 | -0.461935914 | 0.287 | 0.363 | 3.81E-15 | 1.4 |
| CPEB4     | 1.63E-19 | 0.172914075  | 0.249 | 0.16  | 3.94E-15 | 1.4 |
| HERC1     | 1.93E-19 | -0.467006675 | 0.338 | 0.412 | 4.65E-15 | 1.4 |
| WBP2NL    | 2.03E-19 | 0.148270267  | 0.088 | 0.04  | 4.89E-15 | 1.4 |
| DNAH14    | 2.10E-19 | 0.171257792  | 0.107 | 0.052 | 5.06E-15 | 1.4 |
| MAK       | 2.19E-19 | 0.180125623  | 0.135 | 0.073 | 5.29E-15 | 1.4 |
| METAP2    | 2.38E-19 | 0.201729662  | 0.439 | 0.328 | 5.75E-15 | 1.4 |
| LPCAT3    | 2.52E-19 | 0.129265998  | 0.09  | 0.041 | 6.09E-15 | 1.4 |
| TAMM41    | 2.54E-19 | 0.132372146  | 0.076 | 0.032 | 6.13E-15 | 1.4 |
| ENOX2     | 2.74E-19 | 0.182570468  | 0.093 | 0.043 | 6.61E-15 | 1.4 |
| CCDC174   | 2.86E-19 | 0.179175044  | 0.25  | 0.161 | 6.89E-15 | 1.4 |
| SYNJ2     | 3.00E-19 | 0.243025763  | 0.393 | 0.284 | 7.23E-15 | 1.4 |
| FAM3B     | 3.00E-19 | 0.164660157  | 0.116 | 0.06  | 7.24E-15 | 1.4 |
| RP11-106M | 3.06E-19 | 0.130425606  | 0.076 | 0.032 | 7.39E-15 | 1.4 |
| SP100     | 3.36E-19 | 0.206262251  | 0.206 | 0.129 | 8.11E-15 | 1.4 |
| ANKH      | 3.37E-19 | 0.22944382   | 0.114 | 0.058 | 8.12E-15 | 1.4 |
| ALG13     | 3.42E-19 | 0.161897904  | 0.15  | 0.084 | 8.24E-15 | 1.4 |
| TMEM164   | 3.50E-19 | 0.132648451  | 0.077 | 0.033 | 8.45E-15 | 1.4 |
| FOXO3     | 3.63E-19 | 0.178871935  | 0.409 | 0.299 | 8.76E-15 | 1.4 |
| CPEB3     | 3.68E-19 | -0.539987259 | 0.284 | 0.352 | 8.87E-15 | 1.4 |
| RBM5      | 3.95E-19 | 0.187448991  | 0.218 | 0.137 | 9.53E-15 | 1.4 |
| ATE1      | 4.02E-19 | 0.196047521  | 0.159 | 0.091 | 9.70E-15 | 1.4 |
| C1orf21   | 4.14E-19 | -0.446673539 | 0.166 | 0.245 | 9.97E-15 | 1.4 |
| ZNF565    | 4.71E-19 | 0.180820529  | 0.24  | 0.154 | 1.14E-14 | 1.4 |
| NUP153    | 4.95E-19 | -0.422016127 | 0.211 | 0.291 | 1.19E-14 | 1.4 |
| STIM1     | 5.07E-19 | 0.227647999  | 0.274 | 0.185 | 1.22E-14 | 1.4 |
| ANXA4     | 5.58E-19 | 0.169446068  | 0.158 | 0.09  | 1.35E-14 | 1.4 |
| FAM171A1  | 5.80E-19 | 0.176994255  | 0.112 | 0.057 | 1.40E-14 | 1.4 |
| GNA13     | 5.99E-19 | -0.377987434 | 0.142 | 0.219 | 1.44E-14 | 1.4 |
| GIGYF2    | 6.16E-19 | 0.212690255  | 0.323 | 0.224 | 1.49E-14 | 1.4 |
| ST3GAL1   | 6.76E-19 | 0.191706556  | 0.259 | 0.17  | 1.63E-14 | 1.4 |
| FMO4      | 6.92E-19 | 0.136298944  | 0.074 | 0.031 | 1.67E-14 | 1.4 |
| FAM208A   | 6.99E-19 | 0.146822342  | 0.112 | 0.057 | 1.69E-14 | 1.4 |
| ZADH2     | 7.58E-19 | 0.122850064  | 0.064 | 0.025 | 1.83E-14 | 1.4 |
| RGS10     | 8.07E-19 | 0.191186944  | 0.171 | 0.101 | 1.95E-14 | 1.4 |
| SLC25A27  | 8.34E-19 | 0.1196361    | 0.058 | 0.021 | 2.01E-14 | 1.4 |
| PTPRF     | 9.01E-19 | 0.197411765  | 0.136 | 0.074 | 2.17E-14 | 1.4 |
| KPNB1     | 9.08E-19 | -0.390376749 | 0.403 | 0.462 | 2.19E-14 | 1.4 |
| CFLAR     | 9.20E-19 | 0.205543888  | 0.566 | 0.435 | 2.22E-14 | 1.4 |
| CUL4A     | 9.84E-19 | 0.198921271  | 0.195 | 0.119 | 2.37E-14 | 1.4 |
| MAP7D1    | 1.03E-18 | -0.305648241 | 0.082 | 0.151 | 2.47E-14 | 1.4 |
| RP11-123O | 1.07E-18 | 0.201469919  | 0.284 | 0.192 | 2.57E-14 | 1.4 |
| PLEKHM3   | 1.10E-18 | 0.12422957   | 0.082 | 0.036 | 2.64E-14 | 1.4 |
| RTP4      | 1.14E-18 | 0.146395517  | 0.13  | 0.07  | 2.74E-14 | 1.4 |
| GGA1      | 1.16E-18 | 0.145179294  | 0.077 | 0.033 | 2.80E-14 | 1.4 |

|           |          |              |       |       |          |     |
|-----------|----------|--------------|-------|-------|----------|-----|
| RAD9A     | 1.22E-18 | 0.157772329  | 0.155 | 0.089 | 2.95E-14 | 1.4 |
| HLA-A     | 1.23E-18 | 0.217891989  | 0.412 | 0.301 | 2.98E-14 | 1.4 |
| AC009313. | 1.26E-18 | 0.160939385  | 0.185 | 0.111 | 3.05E-14 | 1.4 |
| SEC24A    | 1.33E-18 | -0.414128487 | 0.163 | 0.237 | 3.20E-14 | 1.4 |
| EVI5      | 1.47E-18 | 0.208294523  | 0.192 | 0.118 | 3.54E-14 | 1.4 |
| RP11-796E | 1.58E-18 | 0.136406842  | 0.057 | 0.021 | 3.82E-14 | 1.4 |
| CREB3L2   | 1.67E-18 | 0.225111448  | 0.164 | 0.096 | 4.03E-14 | 1.4 |
| SRSF5     | 1.68E-18 | 0.181566609  | 0.403 | 0.29  | 4.05E-14 | 1.4 |
| IFFO2     | 1.73E-18 | -0.338811592 | 0.09  | 0.161 | 4.17E-14 | 1.4 |
| PDE8A     | 1.77E-18 | 0.290219087  | 0.555 | 0.448 | 4.26E-14 | 1.4 |
| PPM1K     | 1.80E-18 | 0.15969123   | 0.134 | 0.073 | 4.34E-14 | 1.4 |
| LRP2      | 1.83E-18 | 0.248789904  | 0.302 | 0.208 | 4.41E-14 | 1.4 |
| MRAS      | 1.85E-18 | 0.168065082  | 0.117 | 0.061 | 4.46E-14 | 1.4 |
| LNX1      | 1.90E-18 | 0.173457925  | 0.14  | 0.078 | 4.58E-14 | 1.4 |
| SLX4IP    | 1.96E-18 | 0.143923997  | 0.071 | 0.03  | 4.72E-14 | 1.4 |
| TMOD1     | 1.99E-18 | 0.1851269    | 0.179 | 0.108 | 4.80E-14 | 1.4 |
| BTBD11    | 2.01E-18 | 0.172026331  | 0.117 | 0.061 | 4.84E-14 | 1.4 |
| RCAN3     | 2.02E-18 | -0.746791379 | 0.133 | 0.207 | 4.88E-14 | 1.4 |
| IPO7      | 2.22E-18 | -0.371761515 | 0.231 | 0.311 | 5.36E-14 | 1.4 |
| AHNAK     | 2.26E-18 | -0.379908368 | 0.23  | 0.308 | 5.44E-14 | 1.4 |
| PHLDB2    | 2.29E-18 | 0.243358808  | 0.321 | 0.228 | 5.52E-14 | 1.4 |
| ATP1A1    | 2.34E-18 | 0.190547175  | 0.612 | 0.476 | 5.64E-14 | 1.4 |
| CRY1      | 2.35E-18 | -0.512999627 | 0.291 | 0.363 | 5.68E-14 | 1.4 |
| RPL11     | 2.39E-18 | -0.183404006 | 0.973 | 0.983 | 5.76E-14 | 1.4 |
| VWA8      | 2.42E-18 | 0.180075085  | 0.105 | 0.053 | 5.84E-14 | 1.4 |
| MCCC1     | 2.50E-18 | 0.152959953  | 0.155 | 0.089 | 6.03E-14 | 1.4 |
| CHKA      | 2.61E-18 | 0.202727157  | 0.177 | 0.106 | 6.29E-14 | 1.4 |
| TYW1B     | 2.73E-18 | 0.213366573  | 0.209 | 0.132 | 6.59E-14 | 1.4 |
| ANKIB1    | 2.89E-18 | 0.183474343  | 0.398 | 0.291 | 6.96E-14 | 1.4 |
| RUFY3     | 2.91E-18 | 0.224281335  | 0.236 | 0.154 | 7.02E-14 | 1.4 |
| EMC2      | 2.94E-18 | 0.15443879   | 0.263 | 0.173 | 7.08E-14 | 1.4 |
| BAMBI     | 3.10E-18 | 0.167685029  | 0.12  | 0.064 | 7.49E-14 | 1.4 |
| RPL5      | 3.32E-18 | -0.183275922 | 0.965 | 0.977 | 8.02E-14 | 1.4 |
| DDAH1     | 3.39E-18 | -0.301035121 | 0.052 | 0.112 | 8.18E-14 | 1.4 |
| MTIF3     | 3.46E-18 | 0.189922641  | 0.316 | 0.218 | 8.35E-14 | 1.4 |
| BRAF      | 4.10E-18 | 0.182622777  | 0.421 | 0.308 | 9.89E-14 | 1.4 |
| CAP2      | 4.11E-18 | 0.194410715  | 0.143 | 0.081 | 9.90E-14 | 1.4 |
| RFTN2     | 4.44E-18 | 0.151422669  | 0.042 | 0.013 | 1.07E-13 | 1.4 |
| RPS17     | 4.91E-18 | -0.151291836 | 0.952 | 0.967 | 1.18E-13 | 1.4 |
| PTAR1     | 4.99E-18 | 0.171887686  | 0.14  | 0.079 | 1.20E-13 | 1.4 |
| PMS1      | 5.02E-18 | 0.154713594  | 0.081 | 0.037 | 1.21E-13 | 1.4 |
| TMCO1     | 5.16E-18 | 0.162315539  | 0.412 | 0.3   | 1.24E-13 | 1.4 |
| OVOL2     | 5.22E-18 | 0.143889557  | 0.103 | 0.051 | 1.26E-13 | 1.4 |
| ANAPC5    | 5.56E-18 | 0.114932675  | 0.164 | 0.096 | 1.34E-13 | 1.4 |
| SYCP3     | 5.59E-18 | 0.138546769  | 0.058 | 0.022 | 1.35E-13 | 1.4 |
| CNNM2     | 5.95E-18 | 0.13807172   | 0.09  | 0.042 | 1.44E-13 | 1.4 |
| TMEM117   | 6.26E-18 | 0.150450854  | 0.07  | 0.03  | 1.51E-13 | 1.4 |

|            |          |              |       |       |          |     |
|------------|----------|--------------|-------|-------|----------|-----|
| ACO1       | 6.31E-18 | 0.157491145  | 0.094 | 0.046 | 1.52E-13 | 1.4 |
| TMEM135    | 6.42E-18 | 0.173715324  | 0.118 | 0.063 | 1.55E-13 | 1.4 |
| C7orf73    | 6.66E-18 | 0.183217161  | 0.165 | 0.099 | 1.61E-13 | 1.4 |
| NUBPL      | 6.77E-18 | 0.17166614   | 0.099 | 0.049 | 1.63E-13 | 1.4 |
| B4GALT6    | 6.78E-18 | 0.148151187  | 0.071 | 0.03  | 1.63E-13 | 1.4 |
| PIKFYVE    | 7.05E-18 | 0.172138171  | 0.148 | 0.085 | 1.70E-13 | 1.4 |
| PAXBP1     | 7.24E-18 | 0.166766004  | 0.14  | 0.079 | 1.75E-13 | 1.4 |
| GTF2H2     | 7.65E-18 | 0.124935032  | 0.077 | 0.034 | 1.85E-13 | 1.4 |
| GLTP       | 8.04E-18 | 0.193796495  | 0.238 | 0.156 | 1.94E-13 | 1.4 |
| USMG5      | 8.67E-18 | -0.368395941 | 0.557 | 0.599 | 2.09E-13 | 1.4 |
| RPAP2      | 8.68E-18 | 0.187780786  | 0.232 | 0.15  | 2.09E-13 | 1.4 |
| CCDC25     | 8.76E-18 | 0.13955899   | 0.164 | 0.096 | 2.11E-13 | 1.4 |
| TNFRSF11E  | 8.86E-18 | -0.380439283 | 0.06  | 0.121 | 2.14E-13 | 1.4 |
| ZNF720     | 9.09E-18 | 0.136702508  | 0.128 | 0.069 | 2.19E-13 | 1.4 |
| ZFYVE9     | 9.12E-18 | 0.16612414   | 0.158 | 0.093 | 2.20E-13 | 1.4 |
| VPS36      | 9.12E-18 | 0.166153863  | 0.157 | 0.091 | 2.20E-13 | 1.4 |
| UGDH-AS1   | 9.15E-18 | 0.123443475  | 0.084 | 0.039 | 2.21E-13 | 1.4 |
| GBP4       | 9.24E-18 | 0.105501389  | 0.045 | 0.015 | 2.23E-13 | 1.4 |
| GLG1       | 9.47E-18 | 0.194390081  | 0.266 | 0.179 | 2.28E-13 | 1.4 |
| DPYD-AS1   | 9.54E-18 | 0.195489732  | 0.135 | 0.075 | 2.30E-13 | 1.4 |
| ADAMTS9    | 9.97E-18 | -0.493828425 | 0.379 | 0.457 | 2.40E-13 | 1.4 |
| RP11-286N  | 1.01E-17 | 0.12834154   | 0.082 | 0.037 | 2.43E-13 | 1.4 |
| JMJD1C     | 1.05E-17 | -0.358057391 | 0.666 | 0.683 | 2.53E-13 | 1.4 |
| RHOXF1-AS  | 1.09E-17 | 0.10066448   | 0.043 | 0.014 | 2.62E-13 | 1.4 |
| CEP350     | 1.12E-17 | 0.199867152  | 0.258 | 0.174 | 2.69E-13 | 1.4 |
| ADARB1     | 1.14E-17 | 0.139401763  | 0.094 | 0.046 | 2.76E-13 | 1.4 |
| CCPG1      | 1.15E-17 | 0.151047642  | 0.103 | 0.052 | 2.77E-13 | 1.4 |
| PVT1       | 1.17E-17 | -0.449831941 | 0.339 | 0.408 | 2.81E-13 | 1.4 |
| P3H2       | 1.17E-17 | 0.238391925  | 0.186 | 0.114 | 2.83E-13 | 1.4 |
| RUFY1      | 1.20E-17 | 0.187272682  | 0.118 | 0.063 | 2.89E-13 | 1.4 |
| RP11-353N  | 1.23E-17 | 0.126952406  | 0.045 | 0.014 | 2.96E-13 | 1.4 |
| KDM4C      | 1.24E-17 | 0.149719346  | 0.107 | 0.055 | 2.98E-13 | 1.4 |
| GS1-114I9. | 1.25E-17 | 0.169734033  | 0.179 | 0.109 | 3.01E-13 | 1.4 |
| DNAJB14    | 1.32E-17 | 0.180027322  | 0.139 | 0.078 | 3.19E-13 | 1.4 |
| SLC25A46   | 1.33E-17 | 0.122689821  | 0.07  | 0.03  | 3.21E-13 | 1.4 |
| DDHD1      | 1.36E-17 | 0.119901275  | 0.055 | 0.02  | 3.28E-13 | 1.4 |
| TUG1       | 1.40E-17 | 0.169357437  | 0.167 | 0.1   | 3.37E-13 | 1.4 |
| PARP9      | 1.42E-17 | 0.109886363  | 0.089 | 0.042 | 3.42E-13 | 1.4 |
| FGF2       | 1.43E-17 | -0.340279754 | 0.047 | 0.104 | 3.45E-13 | 1.4 |
| TLE4       | 1.45E-17 | -0.41797361  | 0.355 | 0.422 | 3.50E-13 | 1.4 |
| VDR        | 1.50E-17 | 0.144294846  | 0.141 | 0.08  | 3.61E-13 | 1.4 |
| CTSO       | 1.63E-17 | 0.105539382  | 0.054 | 0.02  | 3.93E-13 | 1.4 |
| STAT5A     | 1.64E-17 | 0.149747263  | 0.11  | 0.057 | 3.95E-13 | 1.4 |
| TRMT11     | 1.66E-17 | 0.160466814  | 0.191 | 0.118 | 4.01E-13 | 1.4 |
| EGFR       | 1.67E-17 | 0.188329445  | 0.418 | 0.306 | 4.02E-13 | 1.4 |
| SYNRG      | 1.77E-17 | 0.162637346  | 0.093 | 0.045 | 4.28E-13 | 1.4 |
| DHTKD1     | 1.84E-17 | 0.108470564  | 0.065 | 0.026 | 4.44E-13 | 1.4 |

|           |          |              |       |       |          |     |
|-----------|----------|--------------|-------|-------|----------|-----|
| SLC37A1   | 1.95E-17 | 0.133821255  | 0.084 | 0.039 | 4.69E-13 | 1.4 |
| ZBTB1     | 1.97E-17 | 0.144060151  | 0.133 | 0.074 | 4.75E-13 | 1.4 |
| PSPC1     | 1.99E-17 | 0.193239174  | 0.223 | 0.145 | 4.79E-13 | 1.4 |
| GTF2H5    | 2.03E-17 | 0.17057159   | 0.293 | 0.201 | 4.90E-13 | 1.4 |
| GJC3      | 2.12E-17 | -0.263936093 | 0.044 | 0.1   | 5.11E-13 | 1.4 |
| ZZZ3      | 2.16E-17 | 0.217630622  | 0.236 | 0.157 | 5.20E-13 | 1.4 |
| IFNAR2    | 2.32E-17 | 0.152542317  | 0.381 | 0.275 | 5.58E-13 | 1.4 |
| RP11-541G | 2.37E-17 | 0.110704515  | 0.039 | 0.011 | 5.71E-13 | 1.4 |
| DENND1A   | 2.46E-17 | 0.197427488  | 0.283 | 0.195 | 5.94E-13 | 1.4 |
| TBC1D19   | 2.52E-17 | 0.12010762   | 0.049 | 0.017 | 6.09E-13 | 1.4 |
| ZNF24     | 2.57E-17 | 0.187273585  | 0.299 | 0.209 | 6.19E-13 | 1.4 |
| GRIN2B    | 2.64E-17 | 0.139175123  | 0.061 | 0.024 | 6.37E-13 | 1.4 |
| INO80     | 2.67E-17 | 0.199325118  | 0.22  | 0.144 | 6.44E-13 | 1.4 |
| TDRD3     | 2.80E-17 | 0.163117917  | 0.116 | 0.062 | 6.76E-13 | 1.4 |
| MRPS6     | 3.17E-17 | -0.383367385 | 0.137 | 0.21  | 7.65E-13 | 1.4 |
| ZEB1      | 3.27E-17 | 0.170262123  | 0.082 | 0.038 | 7.89E-13 | 1.4 |
| C3orf52   | 3.33E-17 | -0.234973215 | 0.031 | 0.082 | 8.04E-13 | 1.4 |
| RP11-544A | 3.37E-17 | 0.132566409  | 0.07  | 0.03  | 8.13E-13 | 1.4 |
| YLPM1     | 3.53E-17 | 0.186098637  | 0.177 | 0.109 | 8.51E-13 | 1.4 |
| RNF181    | 3.70E-17 | -0.398946657 | 0.335 | 0.403 | 8.92E-13 | 1.4 |
| SMIM12    | 3.73E-17 | 0.12710406   | 0.068 | 0.029 | 8.99E-13 | 1.4 |
| IFT88     | 3.95E-17 | 0.148324037  | 0.088 | 0.042 | 9.52E-13 | 1.4 |
| MACF1     | 4.00E-17 | -0.416184146 | 0.615 | 0.641 | 9.64E-13 | 1.4 |
| SERP2     | 4.17E-17 | 0.137930394  | 0.042 | 0.013 | 1.00E-12 | 1.4 |
| WDR27     | 4.17E-17 | 0.134744324  | 0.073 | 0.032 | 1.01E-12 | 1.4 |
| CASD1     | 4.42E-17 | 0.151683215  | 0.096 | 0.048 | 1.07E-12 | 1.4 |
| UBA6-AS1  | 4.43E-17 | 0.187492337  | 0.132 | 0.074 | 1.07E-12 | 1.4 |
| KRCC1     | 4.48E-17 | 0.141108506  | 0.119 | 0.064 | 1.08E-12 | 1.4 |
| DDI2      | 4.51E-17 | 0.173337492  | 0.151 | 0.089 | 1.09E-12 | 1.4 |
| VPS29     | 4.55E-17 | -0.352158117 | 0.335 | 0.408 | 1.10E-12 | 1.4 |
| STK17B    | 4.58E-17 | 0.196078401  | 0.172 | 0.105 | 1.10E-12 | 1.4 |
| PNPLA8    | 4.69E-17 | -0.433574722 | 0.233 | 0.309 | 1.13E-12 | 1.4 |
| EGFLAM    | 4.73E-17 | 0.130988726  | 0.052 | 0.019 | 1.14E-12 | 1.4 |
| MT-ND2    | 4.77E-17 | 0.132734063  | 0.977 | 0.975 | 1.15E-12 | 1.4 |
| CDC42EP5  | 4.84E-17 | 0.124008782  | 0.061 | 0.024 | 1.17E-12 | 1.4 |
| FERMT2    | 5.58E-17 | -0.342373808 | 0.111 | 0.18  | 1.34E-12 | 1.4 |
| NFATC3    | 5.62E-17 | 0.195269895  | 0.217 | 0.14  | 1.36E-12 | 1.4 |
| RPS27A    | 6.08E-17 | -0.157639546 | 0.978 | 0.988 | 1.47E-12 | 1.4 |
| APPBP2    | 6.20E-17 | 0.16925487   | 0.157 | 0.093 | 1.49E-12 | 1.4 |
| CD46      | 6.28E-17 | 0.235469495  | 0.51  | 0.399 | 1.52E-12 | 1.4 |
| MTHFD2    | 6.38E-17 | -0.223171509 | 0.046 | 0.102 | 1.54E-12 | 1.4 |
| C7orf49   | 6.42E-17 | 0.124794718  | 0.055 | 0.021 | 1.55E-12 | 1.4 |
| DHRS3     | 6.61E-17 | 0.204492234  | 0.134 | 0.076 | 1.59E-12 | 1.4 |
| TACC1     | 6.88E-17 | 0.272114578  | 0.3   | 0.213 | 1.66E-12 | 1.4 |
| RP3-325F2 | 6.90E-17 | 0.119052061  | 0.061 | 0.025 | 1.66E-12 | 1.4 |
| C1orf132  | 6.97E-17 | 0.161582341  | 0.105 | 0.054 | 1.68E-12 | 1.4 |
| CCNY      | 7.03E-17 | -0.5377933   | 0.206 | 0.28  | 1.70E-12 | 1.4 |

|           |          |              |       |       |          |     |
|-----------|----------|--------------|-------|-------|----------|-----|
| TCHP      | 7.65E-17 | 0.214898626  | 0.07  | 0.03  | 1.84E-12 | 1.4 |
| ZNF226    | 7.74E-17 | 0.141194172  | 0.118 | 0.064 | 1.87E-12 | 1.4 |
| IFRD1     | 7.81E-17 | -0.433615316 | 0.327 | 0.397 | 1.88E-12 | 1.4 |
| ODAM      | 7.90E-17 | 0.309744965  | 0.048 | 0.017 | 1.91E-12 | 1.4 |
| MMP24     | 8.00E-17 | 0.145591912  | 0.153 | 0.09  | 1.93E-12 | 1.4 |
| HYDIN     | 8.14E-17 | 0.143379095  | 0.052 | 0.019 | 1.96E-12 | 1.4 |
| SQRDL     | 8.15E-17 | 0.145615229  | 0.243 | 0.161 | 1.97E-12 | 1.4 |
| SYT7      | 8.58E-17 | 0.106106929  | 0.058 | 0.023 | 2.07E-12 | 1.4 |
| SNRPD1    | 8.68E-17 | -0.379690541 | 0.363 | 0.421 | 2.09E-12 | 1.4 |
| CCL28     | 8.86E-17 | 0.243923437  | 0.78  | 0.681 | 2.14E-12 | 1.4 |
| GNG12     | 9.10E-17 | -0.382837749 | 0.252 | 0.323 | 2.19E-12 | 1.4 |
| SLC30A5   | 9.51E-17 | 0.137872545  | 0.104 | 0.053 | 2.29E-12 | 1.4 |
| DZIP3     | 9.54E-17 | 0.114737704  | 0.072 | 0.032 | 2.30E-12 | 1.4 |
| NR2C1     | 9.58E-17 | 0.147833741  | 0.095 | 0.048 | 2.31E-12 | 1.4 |
| DCAF10    | 9.60E-17 | 0.167724652  | 0.247 | 0.166 | 2.31E-12 | 1.4 |
| CEP162    | 1.00E-16 | 0.122250195  | 0.069 | 0.03  | 2.41E-12 | 1.4 |
| ZNF791    | 1.00E-16 | 0.153187639  | 0.159 | 0.095 | 2.42E-12 | 1.4 |
| MAMLD1    | 1.02E-16 | -0.21580363  | 0.024 | 0.07  | 2.45E-12 | 1.4 |
| ZNF107    | 1.08E-16 | 0.149202087  | 0.114 | 0.061 | 2.61E-12 | 1.4 |
| S100A7    | 1.10E-16 | 0.787468987  | 0.054 | 0.02  | 2.66E-12 | 1.4 |
| SCYL3     | 1.15E-16 | 0.13287501   | 0.058 | 0.023 | 2.76E-12 | 1.4 |
| KB-1562D1 | 1.16E-16 | 0.137656774  | 0.071 | 0.031 | 2.80E-12 | 1.4 |
| LINC01135 | 1.27E-16 | 0.102987026  | 0.035 | 0.01  | 3.07E-12 | 1.4 |
| EEF1A1    | 1.31E-16 | -0.144316973 | 0.975 | 0.986 | 3.16E-12 | 1.4 |
| EIF2AK2   | 1.31E-16 | 0.159483143  | 0.152 | 0.09  | 3.17E-12 | 1.4 |
| AP000998. | 1.37E-16 | 0.124987592  | 0.028 | 0.006 | 3.30E-12 | 1.4 |
| DICER1    | 1.38E-16 | 0.178299422  | 0.225 | 0.147 | 3.32E-12 | 1.4 |
| NPC2      | 1.41E-16 | 0.245391659  | 0.541 | 0.432 | 3.41E-12 | 1.4 |
| XPR1      | 1.41E-16 | 0.179690723  | 0.172 | 0.105 | 3.41E-12 | 1.4 |
| CARD14    | 1.43E-16 | 0.109331845  | 0.059 | 0.023 | 3.46E-12 | 1.4 |
| NDUFAF6   | 1.44E-16 | 0.123107206  | 0.082 | 0.039 | 3.47E-12 | 1.4 |
| SH3GL1    | 1.57E-16 | -0.251398128 | 0.049 | 0.104 | 3.78E-12 | 1.4 |
| ZNF131    | 1.57E-16 | 0.175241421  | 0.193 | 0.123 | 3.79E-12 | 1.4 |
| WNK1      | 1.62E-16 | 0.188817808  | 0.24  | 0.162 | 3.90E-12 | 1.4 |
| FOCAD     | 1.62E-16 | 0.166694335  | 0.239 | 0.159 | 3.91E-12 | 1.4 |
| C9orf72   | 1.63E-16 | 0.143472582  | 0.126 | 0.07  | 3.93E-12 | 1.4 |
| METTL17   | 1.64E-16 | -0.223463614 | 0.029 | 0.077 | 3.94E-12 | 1.4 |
| RSPH3     | 1.70E-16 | 0.141059069  | 0.103 | 0.053 | 4.11E-12 | 1.4 |
| TIMMDC1   | 1.72E-16 | 0.129356416  | 0.086 | 0.041 | 4.14E-12 | 1.4 |
| RP11-83A2 | 1.72E-16 | 0.148107163  | 0.168 | 0.102 | 4.14E-12 | 1.4 |
| OCLN      | 1.79E-16 | -0.36749721  | 0.262 | 0.333 | 4.32E-12 | 1.4 |
| TMEM9B-A  | 1.83E-16 | 0.109999466  | 0.043 | 0.014 | 4.42E-12 | 1.4 |
| RAD50     | 1.87E-16 | 0.153353745  | 0.145 | 0.084 | 4.51E-12 | 1.4 |
| TATDN3    | 1.88E-16 | 0.143348259  | 0.059 | 0.024 | 4.54E-12 | 1.4 |
| CREB5     | 1.90E-16 | -0.474894457 | 0.262 | 0.338 | 4.57E-12 | 1.4 |
| HMGCL     | 1.93E-16 | 0.102972188  | 0.049 | 0.018 | 4.65E-12 | 1.4 |
| APOO      | 2.03E-16 | -0.175878428 | 0.973 | 0.985 | 4.89E-12 | 1.4 |



|           |          |              |       |       |          |     |
|-----------|----------|--------------|-------|-------|----------|-----|
| SSPN      | 2.06E-16 | 0.15136013   | 0.076 | 0.035 | 4.96E-12 | 1.4 |
| ZPLD1     | 2.07E-16 | -0.495493328 | 0.081 | 0.143 | 4.98E-12 | 1.4 |
| INTS8     | 2.07E-16 | 0.110469797  | 0.06  | 0.024 | 4.99E-12 | 1.4 |
| UBASH3B   | 2.08E-16 | -0.243553335 | 0.028 | 0.076 | 5.03E-12 | 1.4 |
| RP11-420A | 2.15E-16 | 0.122617312  | 0.06  | 0.024 | 5.17E-12 | 1.4 |
| KRT80     | 2.26E-16 | -0.164217341 | 0.013 | 0.052 | 5.45E-12 | 1.4 |
| CASK      | 2.28E-16 | 0.166862011  | 0.365 | 0.263 | 5.49E-12 | 1.4 |
| TNFSF15   | 2.30E-16 | 0.120910843  | 0.054 | 0.021 | 5.54E-12 | 1.4 |
| RALGPS2   | 2.49E-16 | -0.397051469 | 0.113 | 0.178 | 6.00E-12 | 1.4 |
| PRR14L    | 2.49E-16 | 0.165967986  | 0.13  | 0.074 | 6.01E-12 | 1.4 |
| TRAPPC11  | 2.54E-16 | 0.145000282  | 0.1   | 0.052 | 6.13E-12 | 1.4 |
| MFSD8     | 2.61E-16 | 0.127251349  | 0.088 | 0.043 | 6.29E-12 | 1.4 |
| APBA2     | 2.62E-16 | 0.128613467  | 0.093 | 0.046 | 6.32E-12 | 1.4 |
| ST3GAL4   | 2.63E-16 | 0.105988856  | 0.051 | 0.019 | 6.33E-12 | 1.4 |
| RBM23     | 2.69E-16 | 0.150239059  | 0.129 | 0.073 | 6.47E-12 | 1.4 |
| MITD1     | 2.69E-16 | 0.141704982  | 0.163 | 0.099 | 6.49E-12 | 1.4 |
| KLHL20    | 2.74E-16 | 0.129111918  | 0.113 | 0.061 | 6.60E-12 | 1.4 |
| RAP2B     | 2.89E-16 | -0.38952505  | 0.141 | 0.208 | 6.98E-12 | 1.4 |
| CMTM8     | 2.95E-16 | 0.208469329  | 0.255 | 0.175 | 7.12E-12 | 1.4 |
| TRAF3     | 3.08E-16 | 0.214806136  | 0.186 | 0.118 | 7.43E-12 | 1.4 |
| FXR1      | 3.10E-16 | -0.357501014 | 0.384 | 0.443 | 7.47E-12 | 1.4 |
| ROBO1     | 3.24E-16 | 0.147551129  | 0.114 | 0.062 | 7.81E-12 | 1.4 |
| LINC00623 | 3.25E-16 | 0.135266997  | 0.073 | 0.033 | 7.84E-12 | 1.4 |
| SRP14     | 3.32E-16 | -0.227533597 | 0.851 | 0.841 | 8.02E-12 | 1.4 |
| AVIL      | 3.42E-16 | 0.116855192  | 0.079 | 0.037 | 8.24E-12 | 1.4 |
| LRIF1     | 3.55E-16 | 0.125477729  | 0.106 | 0.056 | 8.56E-12 | 1.4 |
| CTD-2561J | 3.57E-16 | 0.124213429  | 0.072 | 0.032 | 8.61E-12 | 1.4 |
| RP11-356C | 3.74E-16 | 0.148036255  | 0.325 | 0.227 | 9.02E-12 | 1.4 |
| CDC42BPA  | 3.87E-16 | 0.18026393   | 0.359 | 0.261 | 9.33E-12 | 1.4 |
| CD24      | 3.96E-16 | 0.323433695  | 0.641 | 0.544 | 9.55E-12 | 1.4 |
| FOSL2     | 3.98E-16 | 0.152838697  | 0.24  | 0.16  | 9.60E-12 | 1.4 |
| RABEP1    | 4.02E-16 | 0.148288459  | 0.15  | 0.089 | 9.69E-12 | 1.4 |
| TMEM161E  | 4.04E-16 | 0.144644889  | 0.144 | 0.084 | 9.74E-12 | 1.4 |
| ARL17A    | 4.10E-16 | 0.13895006   | 0.099 | 0.051 | 9.87E-12 | 1.4 |
| RP11-499F | 4.33E-16 | 0.135863599  | 0.035 | 0.01  | 1.04E-11 | 1.4 |
| ROPN1     | 4.42E-16 | -0.221629268 | 0.032 | 0.079 | 1.07E-11 | 1.4 |
| LCORL     | 4.45E-16 | 0.168299044  | 0.167 | 0.102 | 1.07E-11 | 1.4 |
| FZD6      | 4.49E-16 | 0.145919829  | 0.085 | 0.042 | 1.08E-11 | 1.4 |
| CLDN8     | 4.56E-16 | 0.148580274  | 0.129 | 0.073 | 1.10E-11 | 1.4 |
| MAP4K3    | 4.58E-16 | 0.188810805  | 0.235 | 0.157 | 1.10E-11 | 1.4 |
| NEDD9     | 4.58E-16 | -0.438657088 | 0.219 | 0.289 | 1.10E-11 | 1.4 |
| RHOT1     | 4.64E-16 | 0.163222696  | 0.135 | 0.077 | 1.12E-11 | 1.4 |
| HELZ      | 4.65E-16 | -0.37538508  | 0.277 | 0.343 | 1.12E-11 | 1.4 |
| TASP1     | 4.69E-16 | 0.140261017  | 0.206 | 0.133 | 1.13E-11 | 1.4 |
| RP5-945F2 | 4.83E-16 | -0.394559442 | 0.039 | 0.091 | 1.16E-11 | 1.4 |
| BRINP1    | 4.89E-16 | 0.123037025  | 0.264 | 0.18  | 1.18E-11 | 1.4 |
| ACAD10    | 4.96E-16 | 0.106933657  | 0.053 | 0.021 | 1.20E-11 | 1.4 |

|           |          |              |       |       |          |     |
|-----------|----------|--------------|-------|-------|----------|-----|
| LINC01572 | 5.06E-16 | 0.119512221  | 0.07  | 0.031 | 1.22E-11 | 1.4 |
| MYH9      | 5.16E-16 | -0.350524754 | 0.44  | 0.505 | 1.24E-11 | 1.4 |
| ANAPC13   | 5.16E-16 | 0.142646396  | 0.176 | 0.109 | 1.24E-11 | 1.4 |
| LRRC8B    | 5.27E-16 | 0.109842123  | 0.203 | 0.129 | 1.27E-11 | 1.4 |
| MASTL     | 5.32E-16 | 0.143064     | 0.083 | 0.04  | 1.28E-11 | 1.4 |
| RPS15A    | 5.39E-16 | -0.165053965 | 0.96  | 0.973 | 1.30E-11 | 1.4 |
| TTC23     | 5.45E-16 | 0.126500393  | 0.102 | 0.053 | 1.31E-11 | 1.4 |
| ACTR3     | 5.55E-16 | -0.348993863 | 0.249 | 0.322 | 1.34E-11 | 1.4 |
| HSDL2     | 5.73E-16 | 0.167029705  | 0.151 | 0.091 | 1.38E-11 | 1.4 |
| RARRES3   | 6.22E-16 | 0.185797206  | 0.39  | 0.29  | 1.50E-11 | 1.4 |
| GSDMC     | 6.23E-16 | 0.111948294  | 0.064 | 0.028 | 1.50E-11 | 1.4 |
| SLC39A11  | 6.51E-16 | 0.176000764  | 0.115 | 0.063 | 1.57E-11 | 1.4 |
| PTP4A1    | 6.54E-16 | -0.397798136 | 0.158 | 0.229 | 1.58E-11 | 1.4 |
| RP13-726E | 6.58E-16 | 0.105819722  | 0.047 | 0.017 | 1.59E-11 | 1.4 |
| MSRA      | 6.62E-16 | 0.148859128  | 0.107 | 0.057 | 1.60E-11 | 1.4 |
| AFTPH     | 6.69E-16 | -0.369218439 | 0.263 | 0.333 | 1.61E-11 | 1.4 |
| PDLIM5    | 6.78E-16 | -0.33634448  | 0.85  | 0.834 | 1.63E-11 | 1.4 |
| EIF4G3    | 7.67E-16 | 0.166664558  | 0.401 | 0.297 | 1.85E-11 | 1.4 |
| DCLK2     | 7.68E-16 | 0.120515405  | 0.066 | 0.029 | 1.85E-11 | 1.4 |
| CNOT4     | 7.75E-16 | 0.176859164  | 0.427 | 0.322 | 1.87E-11 | 1.4 |
| DMD       | 7.78E-16 | 0.207298661  | 0.554 | 0.442 | 1.88E-11 | 1.4 |
| NFX1      | 7.84E-16 | 0.144064397  | 0.22  | 0.144 | 1.89E-11 | 1.4 |
| NSMCE2    | 8.25E-16 | 0.165627106  | 0.509 | 0.397 | 1.99E-11 | 1.4 |
| SNX3      | 8.35E-16 | 0.155707773  | 0.25  | 0.17  | 2.01E-11 | 1.4 |
| SCGB2A2   | 8.69E-16 | -1.744774555 | 0.141 | 0.207 | 2.10E-11 | 1.4 |
| LINC00869 | 8.80E-16 | 0.140461444  | 0.085 | 0.042 | 2.12E-11 | 1.4 |
| MVP       | 8.90E-16 | 0.128428971  | 0.105 | 0.056 | 2.15E-11 | 1.4 |
| LRCH1     | 9.16E-16 | 0.217084654  | 0.429 | 0.326 | 2.21E-11 | 1.4 |
| ZRANB2    | 9.29E-16 | 0.187714253  | 0.416 | 0.312 | 2.24E-11 | 1.4 |
| LINC00853 | 9.54E-16 | 0.108874076  | 0.056 | 0.023 | 2.30E-11 | 1.4 |
| CETN3     | 9.97E-16 | 0.124268565  | 0.077 | 0.036 | 2.40E-11 | 1.4 |
| CCDC71L   | 1.01E-15 | 0.106612874  | 0.069 | 0.03  | 2.44E-11 | 1.4 |
| MAGI3     | 1.02E-15 | 0.162918544  | 0.243 | 0.165 | 2.45E-11 | 1.4 |
| RSL1D1    | 1.05E-15 | -0.33061843  | 0.621 | 0.633 | 2.54E-11 | 1.4 |
| LINC01515 | 1.06E-15 | 0.130246102  | 0.063 | 0.027 | 2.56E-11 | 1.4 |
| ZMYND11   | 1.08E-15 | 0.14236296   | 0.158 | 0.096 | 2.61E-11 | 1.4 |
| ARL17B    | 1.08E-15 | 0.190354487  | 0.117 | 0.064 | 2.61E-11 | 1.4 |
| HIPK3     | 1.09E-15 | 0.160202138  | 0.241 | 0.163 | 2.63E-11 | 1.4 |
| MBD2      | 1.16E-15 | -0.387673432 | 0.233 | 0.301 | 2.79E-11 | 1.4 |
| EIF4E2    | 1.20E-15 | 0.163256871  | 0.481 | 0.368 | 2.89E-11 | 1.4 |
| YTHDC1    | 1.21E-15 | -0.366680818 | 0.231 | 0.3   | 2.92E-11 | 1.4 |
| GTF3C3    | 1.22E-15 | 0.126813847  | 0.103 | 0.055 | 2.95E-11 | 1.4 |
| S100PBP   | 1.24E-15 | 0.175552271  | 0.159 | 0.097 | 2.99E-11 | 1.4 |
| ICAM1     | 1.24E-15 | 0.142842818  | 0.215 | 0.139 | 3.00E-11 | 1.4 |
| SMARCA4   | 1.26E-15 | 0.170883406  | 0.193 | 0.124 | 3.05E-11 | 1.4 |
| TARS      | 1.30E-15 | -0.290500729 | 0.144 | 0.214 | 3.13E-11 | 1.4 |
| KIAA1958  | 1.43E-15 | 0.16611695   | 0.134 | 0.078 | 3.46E-11 | 1.4 |

|           |          |              |       |       |          |     |
|-----------|----------|--------------|-------|-------|----------|-----|
| TBL1X     | 1.51E-15 | 0.183268653  | 0.22  | 0.146 | 3.63E-11 | 1.4 |
| LAMA1     | 1.51E-15 | 0.106006412  | 0.052 | 0.02  | 3.64E-11 | 1.4 |
| ZNF146    | 1.53E-15 | 0.143849932  | 0.164 | 0.102 | 3.69E-11 | 1.4 |
| HOMER2    | 1.55E-15 | 0.200901029  | 0.277 | 0.194 | 3.75E-11 | 1.4 |
| SNX9      | 1.58E-15 | -0.384997563 | 0.407 | 0.466 | 3.80E-11 | 1.4 |
| LRSAM1    | 1.58E-15 | 0.161864145  | 0.162 | 0.099 | 3.82E-11 | 1.4 |
| RAB28     | 1.64E-15 | 0.122895153  | 0.081 | 0.039 | 3.96E-11 | 1.4 |
| SEL1L     | 1.68E-15 | -0.26270298  | 0.052 | 0.105 | 4.05E-11 | 1.4 |
| KCTD7     | 1.73E-15 | 0.167451441  | 0.176 | 0.111 | 4.16E-11 | 1.4 |
| QRSL1     | 1.75E-15 | 0.128767535  | 0.108 | 0.058 | 4.21E-11 | 1.4 |
| CALCOCO1  | 1.76E-15 | 0.130800302  | 0.119 | 0.066 | 4.23E-11 | 1.4 |
| RALGDS    | 1.77E-15 | 0.122155206  | 0.111 | 0.06  | 4.26E-11 | 1.4 |
| FANCC     | 1.81E-15 | 0.158076788  | 0.178 | 0.112 | 4.37E-11 | 1.4 |
| PAK1      | 1.89E-15 | 0.133634272  | 0.248 | 0.169 | 4.55E-11 | 1.4 |
| TRIP11    | 1.92E-15 | 0.157575662  | 0.205 | 0.134 | 4.64E-11 | 1.4 |
| IRAK4     | 1.99E-15 | 0.116131621  | 0.062 | 0.026 | 4.79E-11 | 1.4 |
| ACAP2     | 2.00E-15 | 0.205920445  | 0.207 | 0.136 | 4.83E-11 | 1.4 |
| CTTNBP2N1 | 2.03E-15 | -0.365049    | 0.233 | 0.301 | 4.88E-11 | 1.4 |
| SLF2      | 2.08E-15 | 0.133887307  | 0.066 | 0.029 | 5.03E-11 | 1.4 |
| RARS      | 2.09E-15 | 0.18619365   | 0.356 | 0.262 | 5.05E-11 | 1.4 |
| SLC38A9   | 2.18E-15 | 0.174804441  | 0.094 | 0.049 | 5.26E-11 | 1.4 |
| MRPS14    | 2.21E-15 | 0.136402908  | 0.214 | 0.141 | 5.32E-11 | 1.4 |
| TOR1AIP2  | 2.21E-15 | -0.341004547 | 0.189 | 0.257 | 5.33E-11 | 1.4 |
| RPL6      | 2.22E-15 | 0.123925311  | 0.967 | 0.969 | 5.35E-11 | 1.4 |
| PEX2      | 2.28E-15 | 0.141716927  | 0.137 | 0.081 | 5.50E-11 | 1.4 |
| RBMX      | 2.30E-15 | 0.157417329  | 0.31  | 0.223 | 5.55E-11 | 1.4 |
| CTNND1    | 2.36E-15 | -0.334628263 | 0.269 | 0.337 | 5.69E-11 | 1.4 |
| TBC1D9    | 2.43E-15 | 0.189034926  | 0.286 | 0.202 | 5.85E-11 | 1.4 |
| PTPRA     | 2.43E-15 | 0.18059686   | 0.202 | 0.132 | 5.86E-11 | 1.4 |
| SLC30A6   | 2.59E-15 | 0.13994393   | 0.091 | 0.046 | 6.24E-11 | 1.4 |
| MINK1     | 2.79E-15 | 0.194220307  | 0.191 | 0.124 | 6.74E-11 | 1.4 |
| NUP214    | 2.81E-15 | 0.152878692  | 0.115 | 0.064 | 6.78E-11 | 1.4 |
| IWS1      | 2.85E-15 | 0.156792526  | 0.202 | 0.131 | 6.86E-11 | 1.4 |
| GPAT3     | 2.86E-15 | -0.266151976 | 0.047 | 0.098 | 6.90E-11 | 1.4 |
| GFOD2     | 3.03E-15 | 0.12227948   | 0.073 | 0.034 | 7.30E-11 | 1.4 |
| CUL1      | 3.30E-15 | 0.166032465  | 0.153 | 0.093 | 7.95E-11 | 1.4 |
| TBC1D22B  | 3.32E-15 | -0.312685618 | 0.135 | 0.203 | 8.00E-11 | 1.4 |
| CTDSP2    | 3.47E-15 | 0.156074309  | 0.247 | 0.168 | 8.36E-11 | 1.4 |
| GCC2      | 3.52E-15 | 0.176063413  | 0.398 | 0.301 | 8.48E-11 | 1.4 |
| CNOT6L    | 3.63E-15 | 0.146442242  | 0.124 | 0.071 | 8.74E-11 | 1.4 |
| TRIB2     | 3.79E-15 | 0.131811149  | 0.088 | 0.045 | 9.13E-11 | 1.4 |
| MDM4      | 3.89E-15 | 0.217586553  | 0.336 | 0.248 | 9.38E-11 | 1.4 |
| PML       | 3.89E-15 | 0.171115059  | 0.16  | 0.099 | 9.39E-11 | 1.4 |
| LINC00907 | 3.90E-15 | 0.112941003  | 0.05  | 0.019 | 9.40E-11 | 1.4 |
| TUBB6     | 4.03E-15 | -0.170538615 | 0.023 | 0.066 | 9.71E-11 | 1.4 |
| RCSD1     | 4.26E-15 | 0.110320237  | 0.038 | 0.012 | 1.03E-10 | 1.4 |
| PPIP5K1   | 4.34E-15 | 0.133632602  | 0.075 | 0.036 | 1.05E-10 | 1.4 |

|           |          |              |       |       |          |     |
|-----------|----------|--------------|-------|-------|----------|-----|
| RSRC1     | 4.44E-15 | 0.151650562  | 0.325 | 0.233 | 1.07E-10 | 1.4 |
| TRAFD1    | 4.55E-15 | 0.160089493  | 0.135 | 0.079 | 1.10E-10 | 1.4 |
| ADAM17    | 4.69E-15 | -0.382510199 | 0.379 | 0.437 | 1.13E-10 | 1.4 |
| ADM       | 4.82E-15 | -0.14447985  | 0.003 | 0.033 | 1.16E-10 | 1.4 |
| CDC42EP1  | 4.88E-15 | 0.198310647  | 0.088 | 0.045 | 1.18E-10 | 1.4 |
| SH3RF1    | 5.03E-15 | -0.336467111 | 0.187 | 0.26  | 1.21E-10 | 1.4 |
| MPV17     | 5.03E-15 | 0.113461141  | 0.073 | 0.034 | 1.21E-10 | 1.4 |
| SLCO3A1   | 5.24E-15 | 0.180744856  | 0.319 | 0.231 | 1.26E-10 | 1.4 |
| ZBTB44    | 5.43E-15 | 0.166212906  | 0.149 | 0.091 | 1.31E-10 | 1.4 |
| VNN2      | 5.53E-15 | 0.132904418  | 0.065 | 0.029 | 1.33E-10 | 1.4 |
| ZBTB10    | 5.76E-15 | 0.159360101  | 0.223 | 0.15  | 1.39E-10 | 1.4 |
| SPATS2    | 5.82E-15 | 0.175968438  | 0.153 | 0.094 | 1.40E-10 | 1.4 |
| AHI1      | 5.85E-15 | 0.220721244  | 0.265 | 0.187 | 1.41E-10 | 1.4 |
| S100B     | 6.22E-15 | -0.21828314  | 0.022 | 0.063 | 1.50E-10 | 1.4 |
| PTPRE     | 6.39E-15 | 0.156167163  | 0.179 | 0.114 | 1.54E-10 | 1.4 |
| KLF9      | 6.50E-15 | 0.164847797  | 0.177 | 0.113 | 1.57E-10 | 1.4 |
| TMEM14C   | 6.63E-15 | 0.129703743  | 0.132 | 0.077 | 1.60E-10 | 1.4 |
| IRAK1BP1  | 6.85E-15 | 0.163299599  | 0.11  | 0.061 | 1.65E-10 | 1.4 |
| QKI       | 6.87E-15 | -0.486046073 | 0.52  | 0.542 | 1.66E-10 | 1.4 |
| MGME1     | 6.93E-15 | 0.127436123  | 0.1   | 0.054 | 1.67E-10 | 1.4 |
| IFT74     | 6.95E-15 | 0.129866195  | 0.083 | 0.041 | 1.68E-10 | 1.4 |
| PHF11     | 6.97E-15 | 0.143535899  | 0.12  | 0.068 | 1.68E-10 | 1.4 |
| PSMF1     | 7.38E-15 | 0.142502022  | 0.134 | 0.079 | 1.78E-10 | 1.4 |
| SENP6     | 7.42E-15 | 0.154288225  | 0.407 | 0.306 | 1.79E-10 | 1.4 |
| CASP8AP2  | 7.44E-15 | 0.11469506   | 0.078 | 0.038 | 1.79E-10 | 1.4 |
| CLTA      | 7.49E-15 | 0.138336606  | 0.213 | 0.141 | 1.81E-10 | 1.4 |
| KRT23     | 7.50E-15 | -0.481252464 | 0.193 | 0.26  | 1.81E-10 | 1.4 |
| ANXA7     | 7.56E-15 | 0.163691005  | 0.363 | 0.27  | 1.82E-10 | 1.4 |
| HIVEP1    | 7.57E-15 | 0.142579036  | 0.213 | 0.141 | 1.83E-10 | 1.4 |
| TXNDC16   | 7.69E-15 | 0.113203919  | 0.067 | 0.03  | 1.85E-10 | 1.4 |
| AL592183. | 7.80E-15 | 0.152123002  | 0.126 | 0.073 | 1.88E-10 | 1.4 |
| PDE4DIP   | 7.82E-15 | 0.11448048   | 0.1   | 0.053 | 1.89E-10 | 1.4 |
| FOXP2     | 8.11E-15 | 0.11144881   | 0.056 | 0.023 | 1.95E-10 | 1.4 |
| AKAP12    | 8.16E-15 | -0.418736142 | 0.011 | 0.046 | 1.97E-10 | 1.4 |
| EIF3I     | 8.98E-15 | -0.280338323 | 0.649 | 0.665 | 2.17E-10 | 1.4 |
| MON2      | 9.16E-15 | 0.128704199  | 0.324 | 0.234 | 2.21E-10 | 1.4 |
| NMT1      | 9.88E-15 | 0.153825942  | 0.247 | 0.172 | 2.38E-10 | 1.4 |
| MYO9A     | 9.91E-15 | 0.173154763  | 0.365 | 0.269 | 2.39E-10 | 1.4 |
| RP5-1180E | 1.02E-14 | 0.114066383  | 0.064 | 0.029 | 2.46E-10 | 1.4 |
| RAB24     | 1.06E-14 | 0.113280959  | 0.058 | 0.025 | 2.55E-10 | 1.4 |
| RAB12     | 1.11E-14 | 0.184015269  | 0.254 | 0.177 | 2.67E-10 | 1.4 |
| CPSF2     | 1.11E-14 | 0.130261554  | 0.077 | 0.037 | 2.67E-10 | 1.4 |
| GABRP     | 1.11E-14 | 0.162076736  | 0.628 | 0.522 | 2.67E-10 | 1.4 |
| RAN       | 1.17E-14 | -0.301530913 | 0.591 | 0.608 | 2.81E-10 | 1.4 |
| C6orf89   | 1.24E-14 | 0.12075063   | 0.118 | 0.067 | 2.99E-10 | 1.4 |
| AHCYL1    | 1.24E-14 | 0.158295688  | 0.353 | 0.258 | 3.00E-10 | 1.4 |
| MCTP1     | 1.24E-14 | 0.183289935  | 0.148 | 0.09  | 3.00E-10 | 1.4 |

|            |          |              |       |       |          |     |
|------------|----------|--------------|-------|-------|----------|-----|
| HIVEP2     | 1.28E-14 | -0.418803732 | 0.317 | 0.385 | 3.08E-10 | 1.4 |
| RASGEF1C   | 1.30E-14 | -0.235588009 | 0.039 | 0.087 | 3.13E-10 | 1.4 |
| FBLIM1     | 1.31E-14 | -0.255530158 | 0.1   | 0.162 | 3.16E-10 | 1.4 |
| LUC7L      | 1.32E-14 | 0.150316763  | 0.137 | 0.082 | 3.19E-10 | 1.4 |
| TUBA1C     | 1.36E-14 | -0.327968435 | 0.31  | 0.375 | 3.27E-10 | 1.4 |
| DYM        | 1.36E-14 | 0.136595918  | 0.311 | 0.223 | 3.27E-10 | 1.4 |
| PBX3       | 1.40E-14 | 0.148002837  | 0.077 | 0.038 | 3.38E-10 | 1.4 |
| ROPN1B     | 1.45E-14 | -0.311036396 | 0.089 | 0.148 | 3.50E-10 | 1.4 |
| CITED2     | 1.47E-14 | 0.128355398  | 0.082 | 0.041 | 3.55E-10 | 1.4 |
| C2orf68    | 1.53E-14 | 0.128843868  | 0.099 | 0.053 | 3.70E-10 | 1.4 |
| NDUFAF7    | 1.62E-14 | 0.123244091  | 0.099 | 0.053 | 3.90E-10 | 1.4 |
| RP11-418J1 | 1.62E-14 | 0.139696645  | 0.071 | 0.033 | 3.91E-10 | 1.4 |
| COG7       | 1.67E-14 | 0.158117444  | 0.115 | 0.065 | 4.04E-10 | 1.4 |
| ATAD2      | 1.70E-14 | 0.129670745  | 0.103 | 0.056 | 4.10E-10 | 1.4 |
| MAPKAPK2   | 1.74E-14 | -0.248299003 | 0.084 | 0.142 | 4.20E-10 | 1.4 |
| RP11-577H  | 1.76E-14 | 0.138485218  | 0.104 | 0.057 | 4.24E-10 | 1.4 |
| MLLT3      | 1.81E-14 | 0.182071082  | 0.201 | 0.134 | 4.36E-10 | 1.4 |
| NSUN4      | 1.91E-14 | 0.106505038  | 0.116 | 0.066 | 4.60E-10 | 1.4 |
| BPGM       | 1.94E-14 | 0.179101094  | 0.217 | 0.146 | 4.68E-10 | 1.4 |
| ZNF714     | 1.96E-14 | 0.109842308  | 0.06  | 0.027 | 4.72E-10 | 1.4 |
| C2CD5      | 1.96E-14 | 0.102148588  | 0.049 | 0.02  | 4.73E-10 | 1.4 |
| SLC25A6    | 1.97E-14 | 0.222543851  | 0.186 | 0.122 | 4.75E-10 | 1.4 |
| ALOX12-AS  | 2.01E-14 | 0.132042885  | 0.104 | 0.057 | 4.85E-10 | 1.4 |
| CBFA2T2    | 2.02E-14 | 0.17030593   | 0.188 | 0.124 | 4.86E-10 | 1.4 |
| SPICE1     | 2.13E-14 | 0.130857973  | 0.082 | 0.041 | 5.13E-10 | 1.4 |
| HUWE1      | 2.14E-14 | 0.122948896  | 0.413 | 0.309 | 5.16E-10 | 1.4 |
| TYMP       | 2.15E-14 | 0.121089207  | 0.052 | 0.021 | 5.19E-10 | 1.4 |
| S100A6     | 2.19E-14 | -0.794251537 | 0.423 | 0.481 | 5.28E-10 | 1.4 |
| STYXL1     | 2.19E-14 | 0.12277225   | 0.092 | 0.048 | 5.28E-10 | 1.4 |
| STRN       | 2.30E-14 | -0.375772739 | 0.355 | 0.412 | 5.54E-10 | 1.4 |
| RABGGTB    | 2.32E-14 | -0.233527845 | 0.055 | 0.107 | 5.59E-10 | 1.4 |
| GLYATL2    | 2.34E-14 | 0.113009219  | 0.11  | 0.061 | 5.65E-10 | 1.4 |
| RANBP10    | 2.38E-14 | 0.148553219  | 0.09  | 0.046 | 5.73E-10 | 1.4 |
| RP11-141M  | 2.39E-14 | 0.182514764  | 0.101 | 0.055 | 5.77E-10 | 1.4 |
| FDFT1      | 2.46E-14 | 0.218149475  | 0.408 | 0.314 | 5.93E-10 | 1.4 |
| CCDC130    | 2.48E-14 | 0.106815393  | 0.063 | 0.028 | 5.99E-10 | 1.4 |
| CDC26      | 2.66E-14 | 0.15135939   | 0.282 | 0.2   | 6.41E-10 | 1.4 |
| YWHAG      | 2.69E-14 | -0.309545559 | 0.182 | 0.249 | 6.48E-10 | 1.4 |
| CD164      | 2.77E-14 | 0.160785355  | 0.236 | 0.161 | 6.68E-10 | 1.4 |
| SERAC1     | 2.88E-14 | -0.259026985 | 0.044 | 0.092 | 6.94E-10 | 1.4 |
| RAB30-AS1  | 2.89E-14 | 0.161267371  | 0.14  | 0.085 | 6.98E-10 | 1.4 |
| DECR1      | 2.90E-14 | 0.137818838  | 0.196 | 0.127 | 6.98E-10 | 1.4 |
| CACHD1     | 2.92E-14 | 0.163205865  | 0.13  | 0.077 | 7.05E-10 | 1.4 |
| FAM172A    | 3.32E-14 | -0.359071172 | 0.737 | 0.752 | 8.01E-10 | 1.4 |
| SEL1L3     | 3.46E-14 | 0.125046582  | 0.086 | 0.045 | 8.35E-10 | 1.4 |
| CLIC1      | 3.53E-14 | -0.304826742 | 0.571 | 0.6   | 8.52E-10 | 1.4 |
| UGCG       | 3.55E-14 | 0.207755685  | 0.398 | 0.305 | 8.57E-10 | 1.4 |

|            |          |              |       |       |          |     |
|------------|----------|--------------|-------|-------|----------|-----|
| CEP95      | 3.82E-14 | 0.139708696  | 0.202 | 0.133 | 9.20E-10 | 1.4 |
| RAB13      | 4.02E-14 | 0.151085608  | 0.192 | 0.126 | 9.69E-10 | 1.4 |
| FBXO38     | 4.31E-14 | 0.104683206  | 0.086 | 0.044 | 1.04E-09 | 1.4 |
| ATRNL1     | 4.49E-14 | 0.18028237   | 0.114 | 0.065 | 1.08E-09 | 1.4 |
| UBE2N      | 4.57E-14 | -0.319098037 | 0.17  | 0.236 | 1.10E-09 | 1.4 |
| CEP112     | 4.66E-14 | 0.105828735  | 0.069 | 0.033 | 1.12E-09 | 1.4 |
| GRAMD1C    | 4.68E-14 | 0.128550842  | 0.074 | 0.036 | 1.13E-09 | 1.4 |
| RP11-513G  | 4.78E-14 | 0.102076878  | 0.038 | 0.013 | 1.15E-09 | 1.4 |
| ACBD6      | 4.92E-14 | 0.127333076  | 0.105 | 0.059 | 1.19E-09 | 1.4 |
| LARS2      | 4.93E-14 | 0.130388721  | 0.074 | 0.036 | 1.19E-09 | 1.4 |
| FBXW11     | 4.98E-14 | 0.129776213  | 0.396 | 0.298 | 1.20E-09 | 1.4 |
| RP11-286E  | 5.02E-14 | -0.205069993 | 0.03  | 0.073 | 1.21E-09 | 1.4 |
| DNAJC16    | 5.02E-14 | 0.117951427  | 0.088 | 0.046 | 1.21E-09 | 1.4 |
| SESN2      | 5.16E-14 | -0.258140772 | 0.066 | 0.119 | 1.25E-09 | 1.4 |
| SLC44A1    | 5.58E-14 | 0.13316854   | 0.131 | 0.078 | 1.34E-09 | 1.4 |
| STEAP3     | 6.22E-14 | 0.13606255   | 0.071 | 0.035 | 1.50E-09 | 1.4 |
| ATP6V1G1   | 6.27E-14 | 0.130218016  | 0.438 | 0.334 | 1.51E-09 | 1.4 |
| PDK1       | 6.32E-14 | -0.268540803 | 0.077 | 0.133 | 1.52E-09 | 1.4 |
| XKR6       | 6.32E-14 | 0.178372862  | 0.226 | 0.155 | 1.52E-09 | 1.4 |
| IQGAP1     | 6.35E-14 | -0.315947284 | 0.389 | 0.45  | 1.53E-09 | 1.4 |
| CEP152     | 6.42E-14 | 0.102742665  | 0.05  | 0.021 | 1.55E-09 | 1.4 |
| MFF        | 6.81E-14 | 0.123079841  | 0.124 | 0.073 | 1.64E-09 | 1.4 |
| PDXDC1     | 6.83E-14 | 0.139173396  | 0.369 | 0.273 | 1.65E-09 | 1.4 |
| SARNP      | 6.87E-14 | -0.347696815 | 0.179 | 0.243 | 1.66E-09 | 1.4 |
| KIZ        | 6.94E-14 | 0.108087033  | 0.059 | 0.026 | 1.67E-09 | 1.4 |
| CFAP44     | 6.95E-14 | 0.104699913  | 0.055 | 0.023 | 1.68E-09 | 1.4 |
| COX7A2     | 7.02E-14 | -0.217606619 | 0.805 | 0.797 | 1.69E-09 | 1.4 |
| MBTD1      | 7.08E-14 | 0.120368435  | 0.224 | 0.152 | 1.71E-09 | 1.4 |
| CSPP1      | 7.23E-14 | 0.171182736  | 0.172 | 0.111 | 1.74E-09 | 1.4 |
| GLMN       | 7.33E-14 | 0.133803344  | 0.086 | 0.045 | 1.77E-09 | 1.4 |
| CDK12      | 7.54E-14 | 0.17839881   | 0.142 | 0.088 | 1.82E-09 | 1.4 |
| FAF2       | 7.65E-14 | 0.179434995  | 0.223 | 0.154 | 1.85E-09 | 1.4 |
| STMN1      | 7.80E-14 | -0.335391628 | 0.147 | 0.212 | 1.88E-09 | 1.4 |
| WWP1       | 8.21E-14 | 0.171011625  | 0.243 | 0.17  | 1.98E-09 | 1.4 |
| PCID2      | 8.22E-14 | 0.136778502  | 0.158 | 0.1   | 1.98E-09 | 1.4 |
| PIK3IP1-AS | 8.24E-14 | 0.130293467  | 0.081 | 0.041 | 1.99E-09 | 1.4 |
| EPB42      | 8.53E-14 | -0.259306794 | 0.915 | 0.931 | 2.06E-09 | 1.4 |
| DHRXS      | 8.57E-14 | 0.173965997  | 0.283 | 0.203 | 2.07E-09 | 1.4 |
| DOPEY1     | 8.69E-14 | 0.134917139  | 0.17  | 0.109 | 2.10E-09 | 1.4 |
| DDX58      | 8.86E-14 | 0.125606588  | 0.114 | 0.065 | 2.14E-09 | 1.4 |
| GRB14      | 8.93E-14 | -0.371762339 | 0.53  | 0.573 | 2.15E-09 | 1.4 |
| TRAPPC13   | 9.30E-14 | 0.116301892  | 0.091 | 0.048 | 2.24E-09 | 1.4 |
| STEAP1B    | 9.68E-14 | -0.256308751 | 0.947 | 0.956 | 2.34E-09 | 1.4 |
| ZBTB38     | 9.90E-14 | -0.293674141 | 0.269 | 0.338 | 2.39E-09 | 1.4 |
| DENND5A    | 1.02E-13 | -0.414101803 | 0.315 | 0.37  | 2.45E-09 | 1.4 |
| ZBTB46     | 1.04E-13 | 0.106400076  | 0.099 | 0.054 | 2.51E-09 | 1.4 |
| DLG2       | 1.04E-13 | 0.155303309  | 0.22  | 0.149 | 2.52E-09 | 1.4 |

|           |          |              |       |       |          |     |
|-----------|----------|--------------|-------|-------|----------|-----|
| MTM1      | 1.06E-13 | -0.37129548  | 0.15  | 0.213 | 2.56E-09 | 1.4 |
| AC013461. | 1.10E-13 | 0.127466102  | 0.268 | 0.19  | 2.64E-09 | 1.4 |
| ENO2      | 1.10E-13 | -0.163938284 | 0.03  | 0.073 | 2.65E-09 | 1.4 |
| BET1      | 1.11E-13 | 0.1436039    | 0.196 | 0.13  | 2.68E-09 | 1.4 |
| MAP2K1    | 1.11E-13 | -0.324017866 | 0.163 | 0.228 | 2.68E-09 | 1.4 |
| GNL3      | 1.14E-13 | -0.325120051 | 0.227 | 0.294 | 2.74E-09 | 1.4 |
| CFL1      | 1.15E-13 | -0.355773472 | 0.194 | 0.261 | 2.78E-09 | 1.4 |
| IFT81     | 1.24E-13 | 0.107042533  | 0.064 | 0.03  | 3.00E-09 | 1.4 |
| EFNA1     | 1.29E-13 | 0.1604206    | 0.153 | 0.097 | 3.10E-09 | 1.4 |
| CCDC57    | 1.30E-13 | 0.143811751  | 0.099 | 0.055 | 3.13E-09 | 1.4 |
| AVL9      | 1.30E-13 | 0.15010562   | 0.234 | 0.162 | 3.13E-09 | 1.4 |
| N4BP1     | 1.33E-13 | 0.154710155  | 0.245 | 0.172 | 3.21E-09 | 1.4 |
| PDS5A     | 1.39E-13 | 0.129240651  | 0.435 | 0.335 | 3.36E-09 | 1.4 |
| LDLR      | 1.43E-13 | 0.172748106  | 0.22  | 0.151 | 3.45E-09 | 1.4 |
| TACC2     | 1.43E-13 | 0.14995042   | 0.196 | 0.133 | 3.46E-09 | 1.4 |
| BNIP3     | 1.54E-13 | -0.244145707 | 0.074 | 0.129 | 3.72E-09 | 1.4 |
| ITPR1     | 1.55E-13 | 0.117216556  | 0.068 | 0.032 | 3.75E-09 | 1.4 |
| CFAP161   | 1.56E-13 | 0.111620555  | 0.058 | 0.026 | 3.75E-09 | 1.4 |
| SUB1      | 1.56E-13 | -0.268331363 | 0.75  | 0.755 | 3.75E-09 | 1.4 |
| PTPN14    | 1.61E-13 | -0.445585203 | 0.424 | 0.469 | 3.88E-09 | 1.4 |
| NIN       | 1.66E-13 | 0.154205288  | 0.144 | 0.088 | 4.01E-09 | 1.4 |
| RCL1      | 1.69E-13 | 0.111101179  | 0.06  | 0.027 | 4.08E-09 | 1.4 |
| EPC2      | 1.70E-13 | 0.114021285  | 0.096 | 0.053 | 4.09E-09 | 1.4 |
| KHDRBS3   | 1.86E-13 | -0.264718356 | 0.083 | 0.139 | 4.48E-09 | 1.4 |
| B2M       | 1.88E-13 | 0.195693726  | 0.981 | 0.987 | 4.52E-09 | 1.4 |
| ZNF440    | 1.89E-13 | 0.105341965  | 0.057 | 0.025 | 4.55E-09 | 1.4 |
| CCDC149   | 1.99E-13 | 0.113263193  | 0.054 | 0.023 | 4.79E-09 | 1.4 |
| MEF2A     | 2.06E-13 | -0.437417641 | 0.351 | 0.401 | 4.96E-09 | 1.4 |
| CEBPZOS   | 2.08E-13 | 0.11683634   | 0.19  | 0.126 | 5.01E-09 | 1.4 |
| AAMDC     | 2.09E-13 | 0.171765972  | 0.218 | 0.15  | 5.03E-09 | 1.4 |
| PKNOX1    | 2.10E-13 | 0.115046614  | 0.067 | 0.032 | 5.05E-09 | 1.4 |
| TMEM27    | 2.24E-13 | -0.16062046  | 0.019 | 0.056 | 5.40E-09 | 1.4 |
| TTF1      | 2.24E-13 | 0.12316523   | 0.167 | 0.107 | 5.40E-09 | 1.4 |
| ARHGEF6   | 2.28E-13 | 0.127921871  | 0.093 | 0.05  | 5.49E-09 | 1.4 |
| MMP24-AS  | 2.31E-13 | 0.106914081  | 0.07  | 0.034 | 5.58E-09 | 1.4 |
| PPID      | 2.47E-13 | 0.118143754  | 0.113 | 0.065 | 5.96E-09 | 1.4 |
| PPFIBP2   | 2.49E-13 | 0.117964321  | 0.138 | 0.084 | 6.01E-09 | 1.4 |
| CBX1      | 2.50E-13 | -0.300493605 | 0.099 | 0.155 | 6.02E-09 | 1.4 |
| LRP10     | 2.53E-13 | 0.127642047  | 0.151 | 0.096 | 6.10E-09 | 1.4 |
| CFLAR-AS1 | 2.62E-13 | 0.116092411  | 0.122 | 0.072 | 6.31E-09 | 1.4 |
| SUMF2     | 2.63E-13 | 0.127207204  | 0.103 | 0.058 | 6.34E-09 | 1.4 |
| ZBTB7C    | 2.83E-13 | 0.127616313  | 0.064 | 0.03  | 6.83E-09 | 1.4 |
| KIF16B    | 2.97E-13 | 0.114053791  | 0.122 | 0.072 | 7.17E-09 | 1.4 |
| SUPT3H    | 2.97E-13 | 0.174428106  | 0.208 | 0.142 | 7.17E-09 | 1.4 |
| PPARA     | 3.07E-13 | 0.119807257  | 0.114 | 0.066 | 7.39E-09 | 1.4 |
| RHOA      | 3.10E-13 | 0.111327751  | 0.065 | 0.031 | 7.47E-09 | 1.4 |
| CTD-2369P | 3.66E-13 | 0.109485009  | 0.048 | 0.02  | 8.82E-09 | 1.4 |

|           |          |              |       |       |          |     |
|-----------|----------|--------------|-------|-------|----------|-----|
| MT-CO2    | 3.73E-13 | 0.140040734  | 0.982 | 0.986 | 8.99E-09 | 1.4 |
| FAM151B   | 3.73E-13 | 0.130394709  | 0.076 | 0.038 | 8.99E-09 | 1.4 |
| SYNPO2    | 3.79E-13 | 0.315873603  | 0.257 | 0.185 | 9.14E-09 | 1.4 |
| SNRPD2    | 3.84E-13 | -0.264723642 | 0.75  | 0.743 | 9.27E-09 | 1.4 |
| LINC00894 | 3.97E-13 | 0.128639356  | 0.096 | 0.053 | 9.58E-09 | 1.4 |
| BTBD3     | 4.03E-13 | 0.165229985  | 0.152 | 0.097 | 9.71E-09 | 1.4 |
| UPF2      | 4.06E-13 | 0.123540267  | 0.349 | 0.262 | 9.79E-09 | 1.4 |
| PRMT2     | 4.12E-13 | 0.133499832  | 0.171 | 0.112 | 9.93E-09 | 1.4 |
| RPA3      | 4.14E-13 | 0.114728995  | 0.165 | 0.106 | 9.97E-09 | 1.4 |
| RPL27     | 4.25E-13 | -0.135677443 | 0.948 | 0.957 | 1.02E-08 | 1.4 |
| EIF3J-AS1 | 4.29E-13 | 0.103339421  | 0.095 | 0.052 | 1.03E-08 | 1.4 |
| RPS6KC1   | 4.37E-13 | 0.150379698  | 0.125 | 0.075 | 1.05E-08 | 1.4 |
| POMP      | 4.40E-13 | -0.271393907 | 0.645 | 0.666 | 1.06E-08 | 1.4 |
| RAD51C    | 4.49E-13 | 0.10410824   | 0.08  | 0.041 | 1.08E-08 | 1.4 |
| MFSD14C   | 4.64E-13 | 0.127332588  | 0.275 | 0.197 | 1.12E-08 | 1.4 |
| MBOAT2    | 4.69E-13 | 0.152946574  | 0.159 | 0.102 | 1.13E-08 | 1.4 |
| C5orf45   | 4.78E-13 | 0.131408411  | 0.068 | 0.033 | 1.15E-08 | 1.4 |
| NDRG1     | 5.02E-13 | -0.561709871 | 0.426 | 0.464 | 1.21E-08 | 1.4 |
| PSMB8     | 5.14E-13 | 0.1299567    | 0.155 | 0.099 | 1.24E-08 | 1.4 |
| SARS      | 5.20E-13 | -0.262414664 | 0.158 | 0.221 | 1.25E-08 | 1.4 |
| TMEM176A  | 5.22E-13 | 0.138187582  | 0.081 | 0.043 | 1.26E-08 | 1.4 |
| EFCAB2    | 5.44E-13 | 0.13820498   | 0.071 | 0.036 | 1.31E-08 | 1.4 |
| NRG1      | 5.57E-13 | 0.153734796  | 0.17  | 0.111 | 1.34E-08 | 1.4 |
| XRCC4     | 5.57E-13 | 0.13126519   | 0.081 | 0.042 | 1.34E-08 | 1.4 |
| DNAJC6    | 5.83E-13 | -0.267896739 | 0.063 | 0.114 | 1.41E-08 | 1.4 |
| ATXN10    | 5.95E-13 | 0.147379186  | 0.207 | 0.141 | 1.44E-08 | 1.4 |
| ZNF91     | 6.03E-13 | 0.135510874  | 0.194 | 0.13  | 1.45E-08 | 1.4 |
| NCOA6     | 6.08E-13 | 0.161898648  | 0.201 | 0.137 | 1.47E-08 | 1.4 |
| HIPK2     | 6.16E-13 | 0.122821572  | 0.3   | 0.219 | 1.49E-08 | 1.4 |
| SPAG9     | 6.20E-13 | -0.375918813 | 0.297 | 0.354 | 1.50E-08 | 1.4 |
| PHF20L1   | 6.24E-13 | 0.161531515  | 0.176 | 0.116 | 1.50E-08 | 1.4 |
| ANO6      | 6.26E-13 | -0.381158961 | 0.312 | 0.368 | 1.51E-08 | 1.4 |
| LRRC28    | 6.31E-13 | 0.16184803   | 0.102 | 0.058 | 1.52E-08 | 1.4 |
| EP400     | 6.51E-13 | 0.126907847  | 0.118 | 0.07  | 1.57E-08 | 1.4 |
| SRGN      | 6.96E-13 | 0.31699709   | 0.057 | 0.026 | 1.68E-08 | 1.4 |
| UBE3B     | 7.02E-13 | 0.101961752  | 0.063 | 0.03  | 1.69E-08 | 1.4 |
| TBC1D4    | 7.13E-13 | 0.157739313  | 0.187 | 0.126 | 1.72E-08 | 1.4 |
| MORC3     | 7.28E-13 | -0.330039137 | 0.18  | 0.242 | 1.75E-08 | 1.4 |
| KIAA1468  | 7.44E-13 | 0.114818267  | 0.152 | 0.096 | 1.79E-08 | 1.4 |
| BCL2      | 7.49E-13 | 0.176684592  | 0.173 | 0.113 | 1.81E-08 | 1.4 |
| RPS24     | 7.71E-13 | -0.1346204   | 0.975 | 0.985 | 1.86E-08 | 1.4 |
| MNAT1     | 7.74E-13 | 0.158694676  | 0.391 | 0.301 | 1.87E-08 | 1.4 |
| KIAA2026  | 8.05E-13 | 0.15085591   | 0.192 | 0.13  | 1.94E-08 | 1.4 |
| SMIM8     | 8.09E-13 | 0.141222576  | 0.126 | 0.077 | 1.95E-08 | 1.4 |
| NOL3      | 8.19E-13 | 0.12286985   | 0.078 | 0.041 | 1.97E-08 | 1.4 |
| PRNP      | 8.45E-13 | -0.265855702 | 0.093 | 0.148 | 2.04E-08 | 1.4 |
| RBM3      | 8.98E-13 | -0.323415623 | 0.478 | 0.513 | 2.16E-08 | 1.4 |



|           |          |              |       |       |          |     |
|-----------|----------|--------------|-------|-------|----------|-----|
| UBE2L3    | 9.58E-13 | -0.299355582 | 0.42  | 0.466 | 2.31E-08 | 1.4 |
| IFIH1     | 1.01E-12 | 0.119779666  | 0.139 | 0.086 | 2.44E-08 | 1.4 |
| KRT81     | 1.02E-12 | -0.3126976   | 0.011 | 0.042 | 2.47E-08 | 1.4 |
| SLC35F5   | 1.07E-12 | 0.13109147   | 0.141 | 0.088 | 2.59E-08 | 1.4 |
| BTF3      | 1.13E-12 | -0.218897779 | 0.937 | 0.95  | 2.72E-08 | 1.4 |
| DDX17     | 1.15E-12 | 0.18074151   | 0.508 | 0.403 | 2.79E-08 | 1.4 |
| RNF180    | 1.16E-12 | 0.123935166  | 0.059 | 0.027 | 2.80E-08 | 1.4 |
| SF3B3     | 1.17E-12 | 0.154457666  | 0.267 | 0.193 | 2.83E-08 | 1.4 |
| GLYR1     | 1.20E-12 | 0.136391866  | 0.16  | 0.104 | 2.89E-08 | 1.4 |
| RPGR      | 1.21E-12 | 0.115276411  | 0.085 | 0.046 | 2.91E-08 | 1.4 |
| RP11-701H | 1.24E-12 | 0.140778368  | 0.077 | 0.04  | 2.98E-08 | 1.4 |
| ARGLU1    | 1.24E-12 | 0.170282461  | 0.227 | 0.159 | 2.99E-08 | 1.4 |
| EPPK1     | 1.28E-12 | -0.187151143 | 0.032 | 0.072 | 3.09E-08 | 1.4 |
| ACADSB    | 1.29E-12 | 0.100787524  | 0.05  | 0.022 | 3.10E-08 | 1.4 |
| TFCP2L1   | 1.35E-12 | -0.405651001 | 0.11  | 0.166 | 3.24E-08 | 1.4 |
| ABCA3     | 1.38E-12 | 0.113780247  | 0.065 | 0.032 | 3.32E-08 | 1.4 |
| ZFAND5    | 1.39E-12 | 0.177851416  | 0.408 | 0.321 | 3.34E-08 | 1.4 |
| ZNF76     | 1.41E-12 | 0.124876205  | 0.052 | 0.023 | 3.39E-08 | 1.4 |
| SCAF11    | 1.41E-12 | 0.164269793  | 0.359 | 0.272 | 3.40E-08 | 1.4 |
| SGCE      | 1.45E-12 | 0.140839166  | 0.097 | 0.055 | 3.49E-08 | 1.4 |
| WDR19     | 1.54E-12 | 0.13554061   | 0.111 | 0.065 | 3.71E-08 | 1.4 |
| MCCC2     | 1.59E-12 | 0.127753843  | 0.157 | 0.102 | 3.83E-08 | 1.4 |
| ZNF529-AS | 1.62E-12 | 0.107620882  | 0.08  | 0.042 | 3.90E-08 | 1.4 |
| TCF7L1    | 1.62E-12 | 0.140869068  | 0.405 | 0.311 | 3.90E-08 | 1.4 |
| PPIA      | 1.64E-12 | -0.199077757 | 0.879 | 0.855 | 3.95E-08 | 1.4 |
| UBAP1     | 1.70E-12 | -0.327500114 | 0.295 | 0.351 | 4.09E-08 | 1.4 |
| GNPTAB    | 1.72E-12 | 0.147940006  | 0.151 | 0.097 | 4.15E-08 | 1.4 |
| TCAIM     | 1.74E-12 | 0.12118997   | 0.095 | 0.053 | 4.20E-08 | 1.4 |
| NRDC      | 1.76E-12 | 0.131225725  | 0.228 | 0.158 | 4.25E-08 | 1.4 |
| SPCS2     | 1.84E-12 | -0.314465264 | 0.271 | 0.331 | 4.45E-08 | 1.4 |
| INTS3     | 1.88E-12 | 0.106261957  | 0.093 | 0.052 | 4.53E-08 | 1.4 |
| KIAA1551  | 1.89E-12 | 0.134240362  | 0.177 | 0.118 | 4.55E-08 | 1.4 |
| TAF4B     | 1.89E-12 | 0.139727652  | 0.099 | 0.056 | 4.56E-08 | 1.4 |
| FGF13     | 1.94E-12 | -0.447226849 | 0.173 | 0.234 | 4.68E-08 | 1.4 |
| FUT9      | 2.00E-12 | 0.112427381  | 0.055 | 0.025 | 4.82E-08 | 1.4 |
| DUSP6     | 2.03E-12 | 0.102455662  | 0.071 | 0.036 | 4.89E-08 | 1.4 |
| CLMN      | 2.06E-12 | -0.347660331 | 0.572 | 0.597 | 4.97E-08 | 1.4 |
| NRIP1     | 2.13E-12 | 0.114278091  | 0.168 | 0.109 | 5.14E-08 | 1.4 |
| HAGH      | 2.14E-12 | 0.105153275  | 0.055 | 0.025 | 5.15E-08 | 1.4 |
| SIL1      | 2.24E-12 | 0.175212229  | 0.147 | 0.094 | 5.41E-08 | 1.4 |
| KRT16     | 2.25E-12 | -0.182375394 | 0.004 | 0.028 | 5.42E-08 | 1.4 |
| CISD1     | 2.32E-12 | 0.138365346  | 0.28  | 0.205 | 5.59E-08 | 1.4 |
| ABLIM1    | 2.35E-12 | 0.166140368  | 0.321 | 0.242 | 5.66E-08 | 1.4 |
| EPG5      | 2.35E-12 | 0.11489131   | 0.127 | 0.078 | 5.66E-08 | 1.4 |
| SYTL3     | 2.35E-12 | 0.122941379  | 0.092 | 0.052 | 5.66E-08 | 1.4 |
| SH3RF2    | 2.39E-12 | -0.120591118 | 0.004 | 0.029 | 5.76E-08 | 1.4 |
| PPA1      | 2.47E-12 | 0.161314501  | 0.32  | 0.24  | 5.96E-08 | 1.4 |

|           |          |              |       |       |          |     |
|-----------|----------|--------------|-------|-------|----------|-----|
| CTSC      | 2.56E-12 | 0.121852379  | 0.084 | 0.045 | 6.18E-08 | 1.4 |
| NEMF      | 2.57E-12 | 0.146568077  | 0.39  | 0.299 | 6.19E-08 | 1.4 |
| TBC1D1    | 2.57E-12 | 0.189638776  | 0.243 | 0.173 | 6.19E-08 | 1.4 |
| COG6      | 2.58E-12 | 0.105684889  | 0.053 | 0.024 | 6.22E-08 | 1.4 |
| HPS4      | 2.66E-12 | 0.117448995  | 0.069 | 0.034 | 6.41E-08 | 1.4 |
| HERC2     | 2.80E-12 | 0.141375074  | 0.117 | 0.071 | 6.75E-08 | 1.4 |
| FAM196A   | 2.81E-12 | 0.11737608   | 0.099 | 0.057 | 6.78E-08 | 1.4 |
| SUGP2     | 2.81E-12 | 0.112015967  | 0.082 | 0.044 | 6.78E-08 | 1.4 |
| MFGE8     | 2.95E-12 | 0.230385425  | 0.237 | 0.17  | 7.11E-08 | 1.4 |
| LYRM2     | 3.05E-12 | 0.131203806  | 0.149 | 0.096 | 7.37E-08 | 1.4 |
| OLFM4     | 3.06E-12 | 0.28152371   | 0.064 | 0.031 | 7.38E-08 | 1.4 |
| ATXN7     | 3.23E-12 | 0.125439845  | 0.192 | 0.131 | 7.80E-08 | 1.4 |
| ZCCHC7    | 3.29E-12 | 0.14536665   | 0.467 | 0.367 | 7.94E-08 | 1.4 |
| TTN-AS1   | 3.31E-12 | 0.128961938  | 0.086 | 0.047 | 7.97E-08 | 1.4 |
| TMLHE     | 3.32E-12 | 0.103350092  | 0.088 | 0.048 | 8.02E-08 | 1.4 |
| MARK2     | 3.35E-12 | 0.142104158  | 0.131 | 0.082 | 8.08E-08 | 1.4 |
| ZCCHC9    | 3.38E-12 | 0.104316043  | 0.096 | 0.054 | 8.15E-08 | 1.4 |
| SMARCAD1  | 3.41E-12 | 0.116303219  | 0.1   | 0.057 | 8.21E-08 | 1.4 |
| HMBOX1    | 3.42E-12 | 0.133910939  | 0.275 | 0.2   | 8.24E-08 | 1.4 |
| NEK1      | 3.69E-12 | 0.14923476   | 0.121 | 0.074 | 8.91E-08 | 1.4 |
| RBL2      | 3.72E-12 | 0.114240011  | 0.135 | 0.084 | 8.97E-08 | 1.4 |
| RP11-277P | 3.76E-12 | 0.104128453  | 0.104 | 0.06  | 9.07E-08 | 1.4 |
| TSG101    | 3.98E-12 | 0.126595476  | 0.227 | 0.159 | 9.60E-08 | 1.4 |
| AEBP2     | 4.16E-12 | 0.116212936  | 0.303 | 0.222 | 1.00E-07 | 1.4 |
| RHPN2     | 4.21E-12 | 0.13289551   | 0.35  | 0.264 | 1.02E-07 | 1.4 |
| EIF2A     | 4.22E-12 | -0.310128902 | 0.404 | 0.444 | 1.02E-07 | 1.4 |
| ELF2      | 4.22E-12 | 0.182555512  | 0.388 | 0.301 | 1.02E-07 | 1.4 |
| C5orf42   | 4.28E-12 | 0.101356695  | 0.073 | 0.038 | 1.03E-07 | 1.4 |
| TRIM44    | 4.34E-12 | 0.150268342  | 0.193 | 0.133 | 1.05E-07 | 1.4 |
| TNS3      | 4.35E-12 | 0.163735554  | 0.114 | 0.069 | 1.05E-07 | 1.4 |
| SFI1      | 4.46E-12 | 0.123751547  | 0.082 | 0.044 | 1.07E-07 | 1.4 |
| RP11-382A | 4.51E-12 | 0.102831943  | 0.08  | 0.042 | 1.09E-07 | 1.4 |
| CAPN7     | 4.60E-12 | 0.104193739  | 0.178 | 0.119 | 1.11E-07 | 1.4 |
| DAB1      | 4.64E-12 | 0.12086135   | 0.094 | 0.053 | 1.12E-07 | 1.4 |
| UBR3      | 4.73E-12 | 0.136333192  | 0.255 | 0.182 | 1.14E-07 | 1.4 |
| ANKRD37   | 4.88E-12 | -0.186305266 | 0.036 | 0.076 | 1.18E-07 | 1.4 |
| SDHC      | 5.01E-12 | 0.129079732  | 0.196 | 0.133 | 1.21E-07 | 1.4 |
| RAB11FIP2 | 5.12E-12 | 0.106703044  | 0.062 | 0.03  | 1.23E-07 | 1.4 |
| PAFAH1B2  | 5.22E-12 | -0.285223104 | 0.191 | 0.248 | 1.26E-07 | 1.4 |
| KIZ-AS1   | 5.27E-12 | -0.180593364 | 0.878 | 0.895 | 1.27E-07 | 1.4 |
| GCA       | 5.41E-12 | 0.113599136  | 0.097 | 0.056 | 1.30E-07 | 1.4 |
| HIP1      | 5.41E-12 | 0.148224913  | 0.128 | 0.079 | 1.30E-07 | 1.4 |
| GTPBP10   | 5.59E-12 | 0.14613284   | 0.139 | 0.088 | 1.35E-07 | 1.4 |
| DNAJC11   | 5.63E-12 | 0.102302079  | 0.078 | 0.041 | 1.36E-07 | 1.4 |
| MT-ND6    | 5.64E-12 | 0.154398901  | 0.209 | 0.146 | 1.36E-07 | 1.4 |
| SIRPA     | 5.66E-12 | 0.121138676  | 0.094 | 0.054 | 1.36E-07 | 1.4 |
| SLC12A8   | 5.67E-12 | 0.100205184  | 0.072 | 0.037 | 1.37E-07 | 1.4 |

|           |          |              |       |       |          |     |
|-----------|----------|--------------|-------|-------|----------|-----|
| SSH2      | 5.82E-12 | 0.135417518  | 0.406 | 0.315 | 1.40E-07 | 1.4 |
| TSTD2     | 5.85E-12 | 0.11007498   | 0.083 | 0.045 | 1.41E-07 | 1.4 |
| CNTNAP3B  | 6.11E-12 | 0.146027853  | 0.152 | 0.099 | 1.47E-07 | 1.4 |
| CEP290    | 6.34E-12 | 0.133657224  | 0.102 | 0.06  | 1.53E-07 | 1.4 |
| DAD1      | 6.36E-12 | -0.308981791 | 0.499 | 0.525 | 1.53E-07 | 1.4 |
| BCL2L11   | 6.46E-12 | 0.114927565  | 0.085 | 0.047 | 1.56E-07 | 1.4 |
| GLUD1     | 6.52E-12 | -0.321228472 | 0.122 | 0.178 | 1.57E-07 | 1.4 |
| ANGPTL1   | 6.65E-12 | -0.232589034 | 0.044 | 0.086 | 1.60E-07 | 1.4 |
| PPP1R13B  | 6.91E-12 | 0.109626972  | 0.176 | 0.118 | 1.67E-07 | 1.4 |
| XPNPEP3   | 7.19E-12 | 0.114371131  | 0.1   | 0.058 | 1.73E-07 | 1.4 |
| ANKRD49   | 7.78E-12 | 0.10823647   | 0.092 | 0.052 | 1.88E-07 | 1.4 |
| GALNT3    | 7.81E-12 | -0.300663858 | 0.168 | 0.228 | 1.88E-07 | 1.4 |
| CASP7     | 8.22E-12 | 0.11736325   | 0.214 | 0.149 | 1.98E-07 | 1.4 |
| RND3      | 8.30E-12 | -0.377401545 | 0.259 | 0.316 | 2.00E-07 | 1.4 |
| TERF2IP   | 8.47E-12 | 0.1449542    | 0.189 | 0.13  | 2.04E-07 | 1.4 |
| TRIP4     | 8.79E-12 | 0.125497365  | 0.073 | 0.038 | 2.12E-07 | 1.4 |
| MRPS31    | 9.09E-12 | 0.114727272  | 0.157 | 0.103 | 2.19E-07 | 1.4 |
| STK38L    | 9.17E-12 | -0.312704465 | 0.103 | 0.156 | 2.21E-07 | 1.4 |
| SPINT1    | 9.62E-12 | 0.163676243  | 0.165 | 0.11  | 2.32E-07 | 1.4 |
| SNRPE     | 9.73E-12 | -0.250055178 | 0.598 | 0.618 | 2.35E-07 | 1.4 |
| CBY1      | 9.88E-12 | 0.122536442  | 0.104 | 0.062 | 2.38E-07 | 1.4 |
| ANAPC16   | 9.89E-12 | 0.125710164  | 0.349 | 0.265 | 2.38E-07 | 1.4 |
| CRLF3     | 9.99E-12 | 0.150431794  | 0.167 | 0.111 | 2.41E-07 | 1.4 |
| IRAK2     | 1.02E-11 | 0.146224024  | 0.185 | 0.126 | 2.46E-07 | 1.4 |
| HADH      | 1.04E-11 | -0.334405278 | 0.162 | 0.22  | 2.50E-07 | 1.4 |
| CLSTN3    | 1.04E-11 | 0.15779409   | 0.082 | 0.045 | 2.51E-07 | 1.4 |
| NMB       | 1.08E-11 | -0.127954106 | 0.008 | 0.035 | 2.60E-07 | 1.4 |
| ECHDC1    | 1.09E-11 | 0.161155948  | 0.333 | 0.255 | 2.64E-07 | 1.4 |
| XIST      | 1.18E-11 | 0.141887156  | 0.766 | 0.659 | 2.84E-07 | 1.4 |
| STXBP5    | 1.20E-11 | 0.107079713  | 0.133 | 0.084 | 2.88E-07 | 1.4 |
| STAT2     | 1.22E-11 | 0.139028695  | 0.13  | 0.082 | 2.95E-07 | 1.4 |
| MAPRE2    | 1.24E-11 | 0.166148189  | 0.181 | 0.123 | 2.99E-07 | 1.4 |
| SLTM      | 1.30E-11 | 0.161679418  | 0.316 | 0.24  | 3.13E-07 | 1.4 |
| HIST2H2BF | 1.34E-11 | 0.105489723  | 0.063 | 0.032 | 3.24E-07 | 1.4 |
| TPRG1     | 1.35E-11 | 0.178491833  | 0.129 | 0.081 | 3.25E-07 | 1.4 |
| NFKBIZ    | 1.36E-11 | -0.246548443 | 0.803 | 0.794 | 3.28E-07 | 1.4 |
| MED27     | 1.36E-11 | 0.123639908  | 0.09  | 0.051 | 3.29E-07 | 1.4 |
| DNAJC9    | 1.38E-11 | 0.106217348  | 0.088 | 0.049 | 3.34E-07 | 1.4 |
| TECPR2    | 1.42E-11 | 0.122544512  | 0.07  | 0.036 | 3.41E-07 | 1.4 |
| HNRNPU-A  | 1.43E-11 | 0.119128605  | 0.111 | 0.067 | 3.45E-07 | 1.4 |
| KDM2B     | 1.48E-11 | 0.113475122  | 0.076 | 0.041 | 3.57E-07 | 1.4 |
| CD44      | 1.51E-11 | 0.124732739  | 0.556 | 0.455 | 3.65E-07 | 1.4 |
| FCHO2     | 1.55E-11 | 0.125244922  | 0.194 | 0.134 | 3.75E-07 | 1.4 |
| TCF7L2    | 1.55E-11 | 0.14530589   | 0.525 | 0.418 | 3.75E-07 | 1.4 |
| FAM208B   | 1.56E-11 | 0.129163854  | 0.239 | 0.172 | 3.76E-07 | 1.4 |
| ZNF407    | 1.59E-11 | 0.113182217  | 0.153 | 0.1   | 3.83E-07 | 1.4 |
| WDR43     | 1.59E-11 | -0.258689812 | 0.075 | 0.123 | 3.84E-07 | 1.4 |

|            |          |              |       |       |          |     |
|------------|----------|--------------|-------|-------|----------|-----|
| TMEM63A    | 1.69E-11 | 0.17308227   | 0.101 | 0.06  | 4.08E-07 | 1.4 |
| JUP        | 1.69E-11 | -0.295214264 | 0.177 | 0.235 | 4.09E-07 | 1.4 |
| PRPF40B    | 1.70E-11 | 0.135163516  | 0.058 | 0.028 | 4.09E-07 | 1.4 |
| PON2       | 1.77E-11 | 0.101497371  | 0.086 | 0.048 | 4.26E-07 | 1.4 |
| UPP2       | 1.77E-11 | 0.102969114  | 0.052 | 0.024 | 4.27E-07 | 1.4 |
| RNF19B     | 1.92E-11 | 0.130369274  | 0.219 | 0.155 | 4.63E-07 | 1.4 |
| ZSCAN5A    | 1.96E-11 | 0.10035426   | 0.055 | 0.026 | 4.72E-07 | 1.4 |
| LRRC49     | 1.98E-11 | 0.112836889  | 0.165 | 0.11  | 4.77E-07 | 1.4 |
| HERC3      | 2.01E-11 | -0.332807896 | 0.117 | 0.169 | 4.85E-07 | 1.4 |
| WDR37      | 2.06E-11 | 0.120553429  | 0.121 | 0.075 | 4.96E-07 | 1.4 |
| C20orf194  | 2.06E-11 | 0.164132322  | 0.207 | 0.144 | 4.98E-07 | 1.4 |
| NUCKS1     | 2.11E-11 | 0.143303371  | 0.37  | 0.286 | 5.08E-07 | 1.4 |
| NT5DC1     | 2.11E-11 | 0.123087036  | 0.102 | 0.06  | 5.10E-07 | 1.4 |
| NCK1       | 2.17E-11 | 0.126995539  | 0.207 | 0.144 | 5.24E-07 | 1.4 |
| LHFP       | 2.19E-11 | 0.12314323   | 0.058 | 0.028 | 5.29E-07 | 1.4 |
| SRGAP3     | 2.23E-11 | 0.152151969  | 0.096 | 0.056 | 5.39E-07 | 1.4 |
| ADRBK2     | 2.27E-11 | 0.14123005   | 0.142 | 0.092 | 5.47E-07 | 1.4 |
| BACE2      | 2.29E-11 | -0.339403404 | 0.427 | 0.469 | 5.52E-07 | 1.4 |
| RP11-84A1  | 2.33E-11 | -0.144725352 | 0.018 | 0.049 | 5.62E-07 | 1.4 |
| ABHD2      | 2.38E-11 | -0.245561144 | 0.066 | 0.112 | 5.75E-07 | 1.4 |
| PDLIM3     | 2.44E-11 | 0.14060548   | 0.091 | 0.052 | 5.89E-07 | 1.4 |
| SLC10A7    | 2.45E-11 | 0.132963444  | 0.088 | 0.05  | 5.90E-07 | 1.4 |
| C16orf72   | 2.53E-11 | -0.23125353  | 0.104 | 0.158 | 6.09E-07 | 1.4 |
| GBP1       | 2.54E-11 | -0.449140887 | 0.151 | 0.205 | 6.12E-07 | 1.4 |
| HNRNPK     | 2.56E-11 | -0.294663968 | 0.446 | 0.483 | 6.18E-07 | 1.4 |
| NASP       | 2.57E-11 | 0.129418004  | 0.23  | 0.165 | 6.18E-07 | 1.4 |
| ODF2L      | 2.60E-11 | 0.154205555  | 0.184 | 0.127 | 6.26E-07 | 1.4 |
| TFAP2A     | 2.63E-11 | 0.113332904  | 0.097 | 0.057 | 6.34E-07 | 1.4 |
| PPP6R2     | 2.69E-11 | 0.164421506  | 0.143 | 0.093 | 6.48E-07 | 1.4 |
| SETDB1     | 2.71E-11 | 0.125809781  | 0.121 | 0.075 | 6.54E-07 | 1.4 |
| ROCK1      | 2.74E-11 | 0.117428058  | 0.259 | 0.188 | 6.60E-07 | 1.4 |
| DNER       | 2.81E-11 | 0.162479436  | 0.103 | 0.062 | 6.78E-07 | 1.4 |
| BCAP29     | 2.99E-11 | 0.159538591  | 0.202 | 0.141 | 7.21E-07 | 1.4 |
| UBLCP1     | 3.03E-11 | 0.101506868  | 0.1   | 0.059 | 7.29E-07 | 1.4 |
| SAR1B      | 3.07E-11 | -0.338619791 | 0.423 | 0.467 | 7.41E-07 | 1.4 |
| LINGO1     | 3.08E-11 | -0.233345784 | 0.867 | 0.89  | 7.42E-07 | 1.4 |
| EZH1       | 3.15E-11 | 0.122359598  | 0.134 | 0.085 | 7.60E-07 | 1.4 |
| EP300      | 3.22E-11 | 0.122257374  | 0.187 | 0.128 | 7.75E-07 | 1.4 |
| CEP70      | 3.29E-11 | 0.114222172  | 0.113 | 0.069 | 7.94E-07 | 1.4 |
| ZNHIT3     | 3.37E-11 | 0.104982619  | 0.26  | 0.19  | 8.13E-07 | 1.4 |
| RP11-767I2 | 3.42E-11 | 0.105915879  | 0.023 | 0.007 | 8.25E-07 | 1.4 |
| SPRED1     | 3.49E-11 | 0.131614695  | 0.107 | 0.065 | 8.41E-07 | 1.4 |
| SNU13      | 3.54E-11 | -0.316939598 | 0.459 | 0.491 | 8.55E-07 | 1.4 |
| DPP10      | 3.59E-11 | 0.146963009  | 0.076 | 0.041 | 8.66E-07 | 1.4 |
| CXorf23    | 3.61E-11 | 0.100619787  | 0.082 | 0.046 | 8.71E-07 | 1.4 |
| KRT17      | 3.61E-11 | -0.217555444 | 0.01  | 0.036 | 8.71E-07 | 1.4 |
| FYN        | 3.63E-11 | -0.116586317 | 0.013 | 0.042 | 8.75E-07 | 1.4 |

|           |          |              |       |       |          |     |
|-----------|----------|--------------|-------|-------|----------|-----|
| NBPF12    | 3.71E-11 | 0.117600423  | 0.093 | 0.054 | 8.95E-07 | 1.4 |
| MTHFD1L   | 3.92E-11 | -0.297525261 | 0.243 | 0.302 | 9.46E-07 | 1.4 |
| SORL1     | 3.95E-11 | 0.104284722  | 0.104 | 0.062 | 9.53E-07 | 1.4 |
| PSMB7     | 3.96E-11 | -0.297864786 | 0.571 | 0.588 | 9.54E-07 | 1.4 |
| ATN1      | 3.98E-11 | 0.105523405  | 0.083 | 0.046 | 9.59E-07 | 1.4 |
| PNP       | 4.00E-11 | -0.156423418 | 0.03  | 0.066 | 9.65E-07 | 1.4 |
| TRIM5     | 4.09E-11 | 0.183163258  | 0.19  | 0.133 | 9.86E-07 | 1.4 |
| ESCO1     | 4.10E-11 | 0.118335822  | 0.134 | 0.086 | 9.88E-07 | 1.4 |
| SNHG12    | 4.17E-11 | -0.190711206 | 0.039 | 0.078 | 1.01E-06 | 1.4 |
| ITPKB     | 4.31E-11 | 0.104720025  | 0.091 | 0.052 | 1.04E-06 | 1.4 |
| FAM107B   | 4.40E-11 | -0.277363245 | 0.201 | 0.26  | 1.06E-06 | 1.4 |
| VCL       | 4.68E-11 | -0.282859311 | 0.28  | 0.339 | 1.13E-06 | 1.4 |
| CDC42SE1  | 4.76E-11 | 0.124314817  | 0.2   | 0.14  | 1.15E-06 | 1.4 |
| ASXL2     | 4.77E-11 | 0.111533942  | 0.109 | 0.066 | 1.15E-06 | 1.4 |
| ERBB2     | 4.82E-11 | 0.108526329  | 0.092 | 0.053 | 1.16E-06 | 1.4 |
| CHIC2     | 5.10E-11 | -0.345863308 | 0.192 | 0.245 | 1.23E-06 | 1.4 |
| FKBP15    | 5.28E-11 | 0.118338674  | 0.088 | 0.051 | 1.27E-06 | 1.4 |
| KIAA0430  | 5.40E-11 | 0.118748778  | 0.103 | 0.062 | 1.30E-06 | 1.4 |
| KAZN      | 5.45E-11 | 0.124387563  | 0.192 | 0.133 | 1.31E-06 | 1.4 |
| FOPNL     | 5.48E-11 | 0.103509687  | 0.095 | 0.056 | 1.32E-06 | 1.4 |
| PDGFRL    | 5.61E-11 | 0.219823814  | 0.082 | 0.046 | 1.35E-06 | 1.4 |
| UEVLD     | 5.87E-11 | 0.119893206  | 0.092 | 0.054 | 1.42E-06 | 1.4 |
| CRHR1     | 5.93E-11 | 0.132235885  | 0.079 | 0.044 | 1.43E-06 | 1.4 |
| MTF2      | 5.99E-11 | 0.110563206  | 0.267 | 0.196 | 1.44E-06 | 1.4 |
| CSTF3     | 6.14E-11 | 0.12529894   | 0.175 | 0.12  | 1.48E-06 | 1.4 |
| HSPG2     | 6.18E-11 | 0.128528268  | 0.155 | 0.104 | 1.49E-06 | 1.4 |
| EIF1AX    | 6.43E-11 | -0.316156243 | 0.198 | 0.252 | 1.55E-06 | 1.4 |
| NR3C2     | 6.49E-11 | 0.125680873  | 0.159 | 0.107 | 1.57E-06 | 1.4 |
| CXCL8     | 6.53E-11 | -1.039639064 | 0.316 | 0.372 | 1.57E-06 | 1.4 |
| SLMAP     | 6.54E-11 | -0.327703004 | 0.628 | 0.631 | 1.58E-06 | 1.4 |
| RPL27A    | 6.74E-11 | 0.119672495  | 0.531 | 0.442 | 1.62E-06 | 1.4 |
| MRE11A    | 6.80E-11 | 0.128510393  | 0.107 | 0.065 | 1.64E-06 | 1.4 |
| TAF3      | 6.97E-11 | 0.10387772   | 0.093 | 0.054 | 1.68E-06 | 1.4 |
| FAM49B    | 7.02E-11 | 0.158604649  | 0.29  | 0.22  | 1.69E-06 | 1.4 |
| HES1      | 7.04E-11 | 0.138762333  | 0.304 | 0.229 | 1.70E-06 | 1.4 |
| RPP38     | 7.33E-11 | 0.13961881   | 0.124 | 0.079 | 1.77E-06 | 1.4 |
| RUBCN     | 7.39E-11 | -0.221888437 | 0.039 | 0.077 | 1.78E-06 | 1.4 |
| PRELID3B  | 7.44E-11 | -0.272168127 | 0.246 | 0.298 | 1.79E-06 | 1.4 |
| LETMD1    | 7.66E-11 | 0.108561108  | 0.122 | 0.077 | 1.85E-06 | 1.4 |
| PRR5L     | 7.68E-11 | 0.103568038  | 0.053 | 0.026 | 1.85E-06 | 1.4 |
| CAAP1     | 7.74E-11 | 0.103159393  | 0.09  | 0.052 | 1.87E-06 | 1.4 |
| TMC4      | 7.92E-11 | 0.116583829  | 0.063 | 0.032 | 1.91E-06 | 1.4 |
| RAB18     | 8.11E-11 | -0.315400777 | 0.248 | 0.3   | 1.96E-06 | 1.4 |
| BCL3      | 8.28E-11 | 0.100610322  | 0.116 | 0.072 | 2.00E-06 | 1.4 |
| UBE4B     | 8.59E-11 | 0.106175086  | 0.264 | 0.194 | 2.07E-06 | 1.4 |
| ZNF644    | 8.72E-11 | 0.152064293  | 0.404 | 0.317 | 2.10E-06 | 1.4 |
| HIF1A-AS2 | 9.72E-11 | -0.356593352 | 0.106 | 0.157 | 2.34E-06 | 1.4 |

|         |          |              |       |       |          |     |
|---------|----------|--------------|-------|-------|----------|-----|
| COX7C   | 1.03E-10 | -0.172401727 | 0.882 | 0.889 | 2.47E-06 | 1.4 |
| CCDC90B | 1.08E-10 | 0.118698505  | 0.132 | 0.085 | 2.59E-06 | 1.4 |
| FAM213A | 1.09E-10 | 0.102796802  | 0.11  | 0.068 | 2.63E-06 | 1.4 |
| TM2D2   | 1.09E-10 | -0.161046586 | 0.033 | 0.069 | 2.63E-06 | 1.4 |
| H2AFJ   | 1.10E-10 | 0.125199814  | 0.056 | 0.028 | 2.64E-06 | 1.4 |
| HERPUD1 | 1.13E-10 | -0.317976679 | 0.157 | 0.21  | 2.72E-06 | 1.4 |
| ROR2    | 1.21E-10 | 0.100037536  | 0.162 | 0.109 | 2.91E-06 | 1.4 |
| OGFRL1  | 1.22E-10 | 0.124679529  | 0.298 | 0.225 | 2.95E-06 | 1.4 |
| ATP5L   | 1.25E-10 | -0.167165782 | 0.86  | 0.855 | 3.01E-06 | 1.4 |
| RASSF8  | 1.25E-10 | -0.270476889 | 0.118 | 0.17  | 3.02E-06 | 1.4 |
| TAF7    | 1.26E-10 | 0.125374577  | 0.188 | 0.132 | 3.04E-06 | 1.4 |
| TMEM217 | 1.29E-10 | -0.192475226 | 0.041 | 0.08  | 3.12E-06 | 1.4 |
| UQCRB   | 1.30E-10 | -0.188887327 | 0.83  | 0.827 | 3.15E-06 | 1.4 |
| MAP4    | 1.34E-10 | -0.300448707 | 0.398 | 0.443 | 3.23E-06 | 1.4 |
| ARL6IP5 | 1.36E-10 | 0.10980698   | 0.565 | 0.461 | 3.27E-06 | 1.4 |
| ZNF165  | 1.37E-10 | -0.202282351 | 0.036 | 0.073 | 3.30E-06 | 1.4 |
| ABI2    | 1.41E-10 | 0.111743561  | 0.194 | 0.135 | 3.41E-06 | 1.4 |
| 10-Sep  | 1.42E-10 | 0.116487119  | 0.192 | 0.135 | 3.42E-06 | 1.4 |
| ELOVL7  | 1.43E-10 | 0.126713283  | 0.116 | 0.073 | 3.45E-06 | 1.4 |
| PTEN    | 1.48E-10 | -0.273368214 | 0.849 | 0.851 | 3.56E-06 | 1.4 |
| PCNXL4  | 1.49E-10 | 0.121840531  | 0.135 | 0.088 | 3.59E-06 | 1.4 |
| DNAJC7  | 1.51E-10 | 0.113147256  | 0.263 | 0.194 | 3.64E-06 | 1.4 |
| HBEGF   | 1.52E-10 | -0.115124265 | 0.008 | 0.032 | 3.66E-06 | 1.4 |
| BRD8    | 1.52E-10 | 0.131432294  | 0.1   | 0.06  | 3.67E-06 | 1.4 |
| SETD2   | 1.57E-10 | 0.127643593  | 0.344 | 0.267 | 3.77E-06 | 1.4 |
| CHM     | 1.60E-10 | 0.110799186  | 0.107 | 0.066 | 3.86E-06 | 1.4 |
| CWF19L2 | 1.70E-10 | 0.108067981  | 0.181 | 0.125 | 4.09E-06 | 1.4 |
| VEGFA   | 1.85E-10 | -0.296440928 | 0.18  | 0.236 | 4.45E-06 | 1.4 |
| C7orf60 | 1.85E-10 | 0.111543858  | 0.124 | 0.079 | 4.47E-06 | 1.4 |
| MICA    | 1.95E-10 | -0.22300397  | 0.098 | 0.147 | 4.70E-06 | 1.4 |
| OXR1    | 1.98E-10 | 0.116054616  | 0.234 | 0.171 | 4.76E-06 | 1.4 |
| RUSC2   | 2.02E-10 | -0.245210135 | 0.086 | 0.133 | 4.88E-06 | 1.4 |
| PIGN    | 2.07E-10 | 0.12529422   | 0.146 | 0.097 | 4.98E-06 | 1.4 |
| RNPC3   | 2.07E-10 | 0.104066064  | 0.107 | 0.066 | 4.99E-06 | 1.4 |
| LRRC37B | 2.10E-10 | 0.107411577  | 0.066 | 0.035 | 5.08E-06 | 1.4 |
| PSMD4   | 2.10E-10 | 0.109930596  | 0.129 | 0.083 | 5.08E-06 | 1.4 |
| EGF     | 2.16E-10 | 0.136381287  | 0.109 | 0.068 | 5.21E-06 | 1.4 |
| SPRED2  | 2.36E-10 | 0.146456054  | 0.154 | 0.104 | 5.68E-06 | 1.4 |
| ICA1    | 2.56E-10 | 0.148077711  | 0.337 | 0.264 | 6.18E-06 | 1.4 |
| SREBF2  | 2.57E-10 | 0.100101642  | 0.427 | 0.338 | 6.20E-06 | 1.4 |
| ZFYVE16 | 2.65E-10 | 0.126306398  | 0.116 | 0.073 | 6.39E-06 | 1.4 |
| CEP57   | 2.81E-10 | 0.119468837  | 0.141 | 0.093 | 6.77E-06 | 1.4 |
| WWTR1   | 2.82E-10 | -0.343303057 | 0.378 | 0.419 | 6.79E-06 | 1.4 |
| C9orf3  | 2.92E-10 | 0.213820211  | 0.208 | 0.153 | 7.04E-06 | 1.4 |
| PIM1    | 2.93E-10 | -0.100981023 | 0.009 | 0.034 | 7.07E-06 | 1.4 |
| LARP4   | 2.95E-10 | 0.116139022  | 0.157 | 0.106 | 7.10E-06 | 1.4 |
| EYA3    | 2.99E-10 | 0.123634634  | 0.132 | 0.086 | 7.20E-06 | 1.4 |

|            |          |              |       |       |          |     |
|------------|----------|--------------|-------|-------|----------|-----|
| NDUFA4     | 2.99E-10 | -0.229832191 | 0.809 | 0.798 | 7.20E-06 | 1.4 |
| ARSB       | 3.08E-10 | 0.121806275  | 0.071 | 0.039 | 7.44E-06 | 1.4 |
| NHSL2      | 3.22E-10 | -0.273977453 | 0.294 | 0.346 | 7.76E-06 | 1.4 |
| ABCD3      | 3.22E-10 | 0.107387303  | 0.105 | 0.065 | 7.76E-06 | 1.4 |
| PRKCI      | 3.25E-10 | -0.283395311 | 0.198 | 0.252 | 7.84E-06 | 1.4 |
| CLEC2D     | 3.28E-10 | 0.112684791  | 0.154 | 0.103 | 7.91E-06 | 1.4 |
| NSMAF      | 3.42E-10 | 0.111058952  | 0.127 | 0.082 | 8.25E-06 | 1.4 |
| DDX52      | 3.46E-10 | 0.105668791  | 0.151 | 0.101 | 8.34E-06 | 1.4 |
| ALPL       | 3.47E-10 | 0.105652499  | 0.085 | 0.049 | 8.37E-06 | 1.4 |
| SLC7A1     | 3.53E-10 | -0.176192348 | 0.066 | 0.109 | 8.52E-06 | 1.4 |
| GLTSCR1L   | 3.71E-10 | 0.112178864  | 0.184 | 0.127 | 8.94E-06 | 1.4 |
| TRIM27     | 3.78E-10 | 0.104867737  | 0.126 | 0.082 | 9.12E-06 | 1.4 |
| NKTR       | 3.91E-10 | 0.13731745   | 0.362 | 0.282 | 9.42E-06 | 1.4 |
| PDZD2      | 3.96E-10 | 0.133533484  | 0.618 | 0.521 | 9.55E-06 | 1.4 |
| TFDP2      | 3.97E-10 | 0.119602546  | 0.277 | 0.21  | 9.57E-06 | 1.4 |
| CYB5D2     | 4.04E-10 | 0.123839828  | 0.06  | 0.031 | 9.74E-06 | 1.4 |
| ARHGEF10I  | 4.12E-10 | 0.135581362  | 0.284 | 0.215 | 9.94E-06 | 1.4 |
| IARS       | 4.26E-10 | -0.247081476 | 0.1   | 0.148 | 1.03E-05 | 1.4 |
| RNF152     | 4.43E-10 | 0.143297586  | 0.07  | 0.038 | 1.07E-05 | 1.4 |
| ZNF141     | 4.45E-10 | 0.106240878  | 0.091 | 0.054 | 1.07E-05 | 1.4 |
| STAU2      | 4.48E-10 | 0.121316258  | 0.129 | 0.084 | 1.08E-05 | 1.4 |
| BCKDHB     | 4.54E-10 | 0.122958911  | 0.077 | 0.044 | 1.09E-05 | 1.4 |
| NF1        | 4.76E-10 | 0.121549623  | 0.525 | 0.433 | 1.15E-05 | 1.4 |
| PIP5K1A    | 5.08E-10 | -0.31774439  | 0.267 | 0.317 | 1.23E-05 | 1.4 |
| PXN        | 5.13E-10 | -0.182022237 | 0.059 | 0.1   | 1.24E-05 | 1.4 |
| RELL1      | 5.30E-10 | 0.101195566  | 0.073 | 0.041 | 1.28E-05 | 1.4 |
| VPS51      | 5.38E-10 | 0.104077883  | 0.083 | 0.048 | 1.30E-05 | 1.4 |
| MYADM      | 5.47E-10 | -0.13526978  | 0.022 | 0.053 | 1.32E-05 | 1.4 |
| ARAP2      | 5.80E-10 | 0.101668004  | 0.181 | 0.127 | 1.40E-05 | 1.4 |
| IGF2BP2-AI | 5.84E-10 | -0.16708236  | 0.025 | 0.056 | 1.41E-05 | 1.4 |
| SGK223     | 5.89E-10 | 0.124413285  | 0.107 | 0.067 | 1.42E-05 | 1.4 |
| APBB2      | 5.94E-10 | 0.134495073  | 0.141 | 0.095 | 1.43E-05 | 1.4 |
| TGOLN2     | 6.00E-10 | 0.113349617  | 0.148 | 0.1   | 1.45E-05 | 1.4 |
| IRF1       | 6.03E-10 | 0.100697789  | 0.191 | 0.133 | 1.46E-05 | 1.4 |
| RPL38      | 6.12E-10 | -0.138675409 | 0.927 | 0.928 | 1.48E-05 | 1.4 |
| IPO11      | 6.30E-10 | 0.101756468  | 0.06  | 0.031 | 1.52E-05 | 1.4 |
| SPATS2L    | 6.36E-10 | 0.151929321  | 0.33  | 0.258 | 1.53E-05 | 1.4 |
| PHF8       | 6.51E-10 | 0.107616992  | 0.099 | 0.06  | 1.57E-05 | 1.4 |
| AKAP1      | 6.73E-10 | 0.103261871  | 0.059 | 0.031 | 1.62E-05 | 1.4 |
| GLIS3      | 6.81E-10 | -0.390016159 | 0.251 | 0.3   | 1.64E-05 | 1.4 |
| TCEB1      | 6.95E-10 | -0.322146501 | 0.259 | 0.308 | 1.68E-05 | 1.4 |
| USP6NL     | 7.22E-10 | -0.329589629 | 0.17  | 0.22  | 1.74E-05 | 1.4 |
| PSMB2      | 7.26E-10 | 0.103784005  | 0.179 | 0.125 | 1.75E-05 | 1.4 |
| ZNF680     | 7.34E-10 | 0.14863922   | 0.13  | 0.086 | 1.77E-05 | 1.4 |
| NFIX       | 7.39E-10 | 0.182744985  | 0.154 | 0.106 | 1.78E-05 | 1.4 |
| TULP4      | 7.51E-10 | -0.343979544 | 0.476 | 0.503 | 1.81E-05 | 1.4 |
| UFM1       | 7.81E-10 | -0.298371254 | 0.317 | 0.364 | 1.88E-05 | 1.4 |

|           |          |              |       |       |          |     |
|-----------|----------|--------------|-------|-------|----------|-----|
| HMGXB4    | 7.83E-10 | 0.109198586  | 0.308 | 0.235 | 1.89E-05 | 1.4 |
| ZNF562    | 7.86E-10 | 0.121260545  | 0.288 | 0.22  | 1.90E-05 | 1.4 |
| CLASP1    | 7.97E-10 | 0.124891671  | 0.309 | 0.238 | 1.92E-05 | 1.4 |
| WDFY3     | 8.24E-10 | 0.103739948  | 0.299 | 0.229 | 1.99E-05 | 1.4 |
| RP11-91P2 | 8.34E-10 | 0.117549181  | 0.07  | 0.039 | 2.01E-05 | 1.4 |
| THOC1     | 8.39E-10 | 0.108725538  | 0.135 | 0.09  | 2.02E-05 | 1.4 |
| TTC3      | 8.79E-10 | 0.107393976  | 0.352 | 0.273 | 2.12E-05 | 1.4 |
| SOSTDC1   | 9.59E-10 | -0.120107364 | 0.007 | 0.029 | 2.31E-05 | 1.4 |
| FBXO11    | 9.64E-10 | -0.313545187 | 0.354 | 0.397 | 2.32E-05 | 1.4 |
| TPTEP1    | 1.00E-09 | 0.135696452  | 0.281 | 0.215 | 2.41E-05 | 1.4 |
| SLC35F3   | 1.01E-09 | -0.163697431 | 0.029 | 0.061 | 2.43E-05 | 1.4 |
| GOLGB1    | 1.01E-09 | 0.123485368  | 0.442 | 0.355 | 2.43E-05 | 1.4 |
| PREP      | 1.02E-09 | -0.203847893 | 0.075 | 0.119 | 2.45E-05 | 1.4 |
| PUM1      | 1.04E-09 | -0.263623138 | 0.492 | 0.521 | 2.51E-05 | 1.4 |
| FAM46B    | 1.04E-09 | -0.195961865 | 0.045 | 0.083 | 2.51E-05 | 1.4 |
| TTC9      | 1.07E-09 | 0.119576948  | 0.242 | 0.179 | 2.58E-05 | 1.4 |
| HIST1H2BJ | 1.10E-09 | 0.135641673  | 0.124 | 0.081 | 2.66E-05 | 1.4 |
| ATP6V1B2  | 1.12E-09 | 0.14028944   | 0.19  | 0.138 | 2.71E-05 | 1.4 |
| ZRANB1    | 1.14E-09 | -0.263530796 | 0.122 | 0.17  | 2.75E-05 | 1.4 |
| IDH1      | 1.18E-09 | 0.102463587  | 0.099 | 0.061 | 2.85E-05 | 1.4 |
| LNPEP     | 1.21E-09 | 0.11182239   | 0.141 | 0.095 | 2.92E-05 | 1.4 |
| MRPL19    | 1.22E-09 | 0.108040684  | 0.085 | 0.05  | 2.95E-05 | 1.4 |
| CD74      | 1.25E-09 | 0.12487897   | 0.198 | 0.142 | 3.02E-05 | 1.4 |
| RPTOR     | 1.26E-09 | 0.102556235  | 0.088 | 0.052 | 3.04E-05 | 1.4 |
| CYP20A1   | 1.29E-09 | 0.101758911  | 0.097 | 0.06  | 3.11E-05 | 1.4 |
| CAPRIN1   | 1.30E-09 | 0.109556967  | 0.286 | 0.217 | 3.13E-05 | 1.4 |
| BOD1L1    | 1.31E-09 | 0.133950454  | 0.139 | 0.094 | 3.15E-05 | 1.4 |
| AC005042. | 1.36E-09 | 0.13245026   | 0.101 | 0.063 | 3.27E-05 | 1.4 |
| R3HCC1L   | 1.39E-09 | 0.120030408  | 0.163 | 0.113 | 3.35E-05 | 1.4 |
| PI4KA     | 1.40E-09 | 0.117710227  | 0.124 | 0.081 | 3.37E-05 | 1.4 |
| RPL13A    | 1.42E-09 | 0.173009347  | 0.607 | 0.513 | 3.44E-05 | 1.4 |
| AATF      | 1.45E-09 | 0.107629879  | 0.062 | 0.033 | 3.51E-05 | 1.4 |
| SMYD4     | 1.46E-09 | 0.118605463  | 0.05  | 0.025 | 3.51E-05 | 1.4 |
| NR2C2     | 1.48E-09 | 0.126960986  | 0.176 | 0.124 | 3.57E-05 | 1.4 |
| GPR87     | 1.51E-09 | -0.169021797 | 0.032 | 0.064 | 3.63E-05 | 1.4 |
| LINC01481 | 1.61E-09 | 0.108003131  | 0.079 | 0.046 | 3.87E-05 | 1.4 |
| RSF1      | 1.63E-09 | 0.110960424  | 0.384 | 0.303 | 3.93E-05 | 1.4 |
| HNRNPLL   | 1.66E-09 | 0.128661866  | 0.147 | 0.101 | 4.00E-05 | 1.4 |
| FAM174B   | 1.66E-09 | 0.118197619  | 0.082 | 0.049 | 4.01E-05 | 1.4 |
| BCL10     | 1.69E-09 | -0.231803883 | 0.095 | 0.14  | 4.07E-05 | 1.4 |
| DLGAP4    | 1.69E-09 | 0.140272277  | 0.145 | 0.098 | 4.08E-05 | 1.4 |
| ATP6V1D   | 1.90E-09 | -0.333668902 | 0.259 | 0.304 | 4.59E-05 | 1.4 |
| ZNF592    | 1.91E-09 | -0.238024031 | 0.091 | 0.135 | 4.60E-05 | 1.4 |
| IDS       | 1.92E-09 | -0.11227961  | 0.022 | 0.052 | 4.64E-05 | 1.4 |
| SCOC      | 1.93E-09 | 0.115393891  | 0.317 | 0.245 | 4.65E-05 | 1.4 |
| CDK14     | 1.98E-09 | -0.313787075 | 0.375 | 0.413 | 4.78E-05 | 1.4 |
| PTPN12    | 2.06E-09 | -0.277833687 | 0.399 | 0.435 | 4.98E-05 | 1.4 |



|            |          |              |       |       |           |     |
|------------|----------|--------------|-------|-------|-----------|-----|
| RRAS2      | 2.20E-09 | -0.30314704  | 0.188 | 0.239 | 5.30E-05  | 1.4 |
| JKAMP      | 2.21E-09 | 0.103780461  | 0.113 | 0.073 | 5.34E-05  | 1.4 |
| TTC9C      | 2.23E-09 | 0.108002372  | 0.189 | 0.136 | 5.38E-05  | 1.4 |
| APPL2      | 2.27E-09 | 0.116569287  | 0.101 | 0.064 | 5.48E-05  | 1.4 |
| OCIAD1     | 2.31E-09 | 0.108892375  | 0.331 | 0.258 | 5.58E-05  | 1.4 |
| RP1-78O14  | 2.34E-09 | -0.260495356 | 0.042 | 0.077 | 5.64E-05  | 1.4 |
| DROSHA     | 2.34E-09 | 0.107221395  | 0.063 | 0.034 | 5.65E-05  | 1.4 |
| CENPC      | 2.46E-09 | 0.104745034  | 0.098 | 0.061 | 5.93E-05  | 1.4 |
| INADL      | 2.49E-09 | 0.108825101  | 0.872 | 0.774 | 6.01E-05  | 1.4 |
| HCG17      | 2.51E-09 | 0.109555546  | 0.095 | 0.058 | 6.06E-05  | 1.4 |
| PLSCR4     | 2.57E-09 | 0.133168191  | 0.109 | 0.07  | 6.19E-05  | 1.4 |
| RPS2       | 2.57E-09 | 0.186731182  | 0.434 | 0.358 | 6.19E-05  | 1.4 |
| PRKRA      | 2.71E-09 | 0.112156732  | 0.109 | 0.07  | 6.54E-05  | 1.4 |
| ELF3       | 2.78E-09 | -0.351745756 | 0.517 | 0.544 | 6.71E-05  | 1.4 |
| DSG2       | 2.81E-09 | -0.273121722 | 0.33  | 0.369 | 6.77E-05  | 1.4 |
| ZSWIM7     | 2.88E-09 | 0.138191329  | 0.1   | 0.063 | 6.96E-05  | 1.4 |
| NXN        | 3.01E-09 | 0.16028982   | 0.206 | 0.151 | 7.26E-05  | 1.4 |
| TRAM1      | 3.02E-09 | -0.226212512 | 0.178 | 0.229 | 7.28E-05  | 1.4 |
| ZNF721     | 3.15E-09 | 0.141004089  | 0.262 | 0.199 | 7.60E-05  | 1.4 |
| TMA16      | 3.18E-09 | 0.100761362  | 0.074 | 0.043 | 7.66E-05  | 1.4 |
| CREBBP     | 3.22E-09 | 0.125854179  | 0.289 | 0.222 | 7.77E-05  | 1.4 |
| CBWD7      | 3.23E-09 | 0.105260922  | 0.102 | 0.064 | 7.79E-05  | 1.4 |
| ABL1       | 3.25E-09 | 0.113310814  | 0.169 | 0.12  | 7.83E-05  | 1.4 |
| HIST1H4H   | 3.30E-09 | 0.104077092  | 0.098 | 0.061 | 7.97E-05  | 1.4 |
| FGD4       | 3.33E-09 | -0.338099044 | 0.231 | 0.279 | 8.03E-05  | 1.4 |
| LCN2       | 3.38E-09 | 0.131717131  | 0.056 | 0.03  | 8.15E-05  | 1.4 |
| RPL23      | 3.40E-09 | -0.103916171 | 0.961 | 0.964 | 8.20E-05  | 1.4 |
| RP11-415J8 | 3.41E-09 | 0.109568048  | 0.087 | 0.052 | 8.22E-05  | 1.4 |
| GRIN2A     | 3.43E-09 | -0.244773987 | 0.033 | 0.065 | 8.26E-05  | 1.4 |
| SMG6       | 3.49E-09 | 0.125850149  | 0.2   | 0.145 | 8.41E-05  | 1.4 |
| GTF2IRD1   | 3.52E-09 | -0.249119054 | 0.113 | 0.159 | 8.49E-05  | 1.4 |
| MT-CO1     | 3.60E-09 | 0.177686824  | 0.983 | 0.991 | 8.69E-05  | 1.4 |
| NOL4       | 3.67E-09 | 0.113181428  | 0.067 | 0.038 | 8.85E-05  | 1.4 |
| AK9        | 3.68E-09 | 0.108212864  | 0.083 | 0.05  | 8.87E-05  | 1.4 |
| CTNNA1     | 3.69E-09 | -0.258103776 | 0.478 | 0.506 | 8.91E-05  | 1.4 |
| WHSC1L1    | 3.71E-09 | 0.125609579  | 0.234 | 0.176 | 8.95E-05  | 1.4 |
| CTGF       | 3.84E-09 | -0.188006098 | 0.016 | 0.041 | 9.26E-05  | 1.4 |
| LIPE-AS1   | 3.95E-09 | 0.109843855  | 0.113 | 0.073 | 9.53E-05  | 1.4 |
| ARID2      | 4.03E-09 | 0.129911885  | 0.352 | 0.28  | 9.72E-05  | 1.4 |
| CLNS1A     | 4.07E-09 | 0.109007834  | 0.121 | 0.079 | 9.82E-05  | 1.4 |
| NSUN3      | 4.17E-09 | 0.11212241   | 0.074 | 0.043 | 0.0001006 | 1.4 |
| GCH1       | 4.18E-09 | 0.172646883  | 0.121 | 0.08  | 0.0001007 | 1.4 |
| STOM       | 4.20E-09 | 0.128377407  | 0.241 | 0.182 | 0.0001013 | 1.4 |
| RP11-68E11 | 4.21E-09 | -0.149092731 | 0.031 | 0.062 | 0.0001016 | 1.4 |
| GK         | 4.23E-09 | 0.106967531  | 0.074 | 0.043 | 0.000102  | 1.4 |
| IRF6       | 4.25E-09 | -0.290950435 | 0.186 | 0.234 | 0.0001024 | 1.4 |
| TANC1      | 4.31E-09 | 0.13554785   | 0.308 | 0.24  | 0.0001039 | 1.4 |

|           |          |              |       |       |           |     |
|-----------|----------|--------------|-------|-------|-----------|-----|
| HNRNPC    | 4.37E-09 | -0.264155269 | 0.823 | 0.8   | 0.0001053 | 1.4 |
| UQCRH     | 4.42E-09 | -0.185102153 | 0.85  | 0.856 | 0.0001066 | 1.4 |
| PFKFB4    | 4.46E-09 | -0.144532835 | 0.019 | 0.047 | 0.0001075 | 1.4 |
| SLC6A14   | 4.57E-09 | -0.299496032 | 0.173 | 0.226 | 0.0001102 | 1.4 |
| RP11-4790 | 4.75E-09 | 0.113008114  | 0.088 | 0.053 | 0.0001146 | 1.4 |
| LAMP2     | 4.77E-09 | -0.311083949 | 0.219 | 0.265 | 0.0001149 | 1.4 |
| KIAA1328  | 4.79E-09 | 0.117413544  | 0.118 | 0.078 | 0.0001155 | 1.4 |
| LARGE     | 4.82E-09 | 0.107520935  | 0.284 | 0.217 | 0.0001163 | 1.4 |
| IMMP1L    | 5.24E-09 | 0.114747688  | 0.11  | 0.072 | 0.0001265 | 1.4 |
| SET       | 5.31E-09 | -0.25768343  | 0.464 | 0.495 | 0.0001281 | 1.4 |
| FRK       | 5.34E-09 | 0.117600503  | 0.207 | 0.153 | 0.0001289 | 1.4 |
| PPM1B     | 5.43E-09 | 0.118095149  | 0.221 | 0.164 | 0.000131  | 1.4 |
| EXOC2     | 5.68E-09 | 0.102514097  | 0.101 | 0.064 | 0.000137  | 1.4 |
| KMT2C     | 5.75E-09 | -0.349855555 | 0.624 | 0.61  | 0.0001386 | 1.4 |
| AQR       | 5.79E-09 | 0.12128865   | 0.113 | 0.073 | 0.0001397 | 1.4 |
| SEC11A    | 5.80E-09 | -0.238194593 | 0.52  | 0.539 | 0.0001399 | 1.4 |
| PER2      | 6.39E-09 | 0.121849736  | 0.133 | 0.09  | 0.000154  | 1.4 |
| NCK2      | 6.82E-09 | 0.139093207  | 0.204 | 0.15  | 0.0001644 | 1.4 |
| ADGRL3-AS | 6.87E-09 | -0.214545536 | 0.641 | 0.674 | 0.0001656 | 1.4 |
| DIAPH3    | 6.90E-09 | -0.22560213  | 0.093 | 0.138 | 0.0001664 | 1.4 |
| CABIN1    | 7.10E-09 | 0.109449738  | 0.104 | 0.066 | 0.0001711 | 1.4 |
| KLHL28    | 7.14E-09 | 0.100500743  | 0.104 | 0.066 | 0.0001722 | 1.4 |
| BMPR1B    | 7.26E-09 | -0.220569121 | 0.015 | 0.039 | 0.000175  | 1.4 |
| HSPA9     | 7.27E-09 | -0.247306305 | 0.176 | 0.223 | 0.0001754 | 1.4 |
| SUN1      | 7.28E-09 | -0.184884547 | 0.078 | 0.119 | 0.0001756 | 1.4 |
| CDCP1     | 7.29E-09 | -0.322459886 | 0.347 | 0.387 | 0.0001758 | 1.4 |
| NPC1      | 7.34E-09 | -0.340194719 | 0.293 | 0.334 | 0.0001769 | 1.4 |
| PRKCA     | 7.78E-09 | -0.218453498 | 0.062 | 0.1   | 0.0001877 | 1.4 |
| REST      | 7.83E-09 | 0.108465793  | 0.099 | 0.063 | 0.0001888 | 1.4 |
| RP11-613M | 7.87E-09 | 0.111603162  | 0.091 | 0.056 | 0.0001898 | 1.4 |
| LMBR1     | 8.15E-09 | 0.102224244  | 0.156 | 0.109 | 0.0001966 | 1.4 |
| AHR       | 8.22E-09 | -0.265635077 | 0.169 | 0.218 | 0.0001982 | 1.4 |
| ZNF281    | 8.24E-09 | -0.177928324 | 0.063 | 0.101 | 0.0001987 | 1.4 |
| ARFIP1    | 8.27E-09 | 0.109271719  | 0.19  | 0.137 | 0.0001994 | 1.4 |
| FABP3     | 8.30E-09 | -0.189545888 | 0.003 | 0.02  | 0.0002001 | 1.4 |
| NUP58     | 8.54E-09 | -0.178695154 | 0.075 | 0.117 | 0.0002059 | 1.4 |
| KANK1     | 8.57E-09 | -0.223332234 | 0.179 | 0.232 | 0.0002067 | 1.4 |
| ZNF814    | 8.93E-09 | 0.100170248  | 0.123 | 0.082 | 0.0002152 | 1.4 |
| IGBP1     | 9.01E-09 | 0.100908391  | 0.524 | 0.432 | 0.0002173 | 1.4 |
| RAB11FIP3 | 9.31E-09 | 0.109211355  | 0.107 | 0.069 | 0.0002244 | 1.4 |
| MT1E      | 9.46E-09 | 0.267280308  | 0.06  | 0.033 | 0.000228  | 1.4 |
| CAMTA1    | 9.47E-09 | -0.315259184 | 0.506 | 0.529 | 0.0002283 | 1.4 |
| RPL7A     | 9.84E-09 | -0.160463885 | 0.967 | 0.979 | 0.0002372 | 1.4 |
| FHL2      | 9.84E-09 | -0.162133436 | 0.054 | 0.09  | 0.0002372 | 1.4 |
| DGKH      | 1.02E-08 | 0.128757959  | 0.196 | 0.144 | 0.0002469 | 1.4 |
| GALNT1    | 1.03E-08 | -0.243411341 | 0.118 | 0.162 | 0.0002479 | 1.4 |
| ANKRD6    | 1.07E-08 | 0.106282135  | 0.118 | 0.078 | 0.000258  | 1.4 |

|           |          |              |       |       |           |     |
|-----------|----------|--------------|-------|-------|-----------|-----|
| EIF2S1    | 1.08E-08 | -0.291602412 | 0.227 | 0.273 | 0.0002599 | 1.4 |
| PRCC      | 1.08E-08 | 0.104767591  | 0.097 | 0.062 | 0.0002603 | 1.4 |
| DTX2      | 1.09E-08 | 0.100285694  | 0.135 | 0.092 | 0.0002626 | 1.4 |
| HPRT1     | 1.09E-08 | 0.116944993  | 0.095 | 0.06  | 0.0002637 | 1.4 |
| DUSP14    | 1.11E-08 | -0.130950755 | 0.02  | 0.046 | 0.0002673 | 1.4 |
| NR4A1     | 1.12E-08 | -0.109840665 | 0.01  | 0.032 | 0.0002696 | 1.4 |
| STC2      | 1.12E-08 | 0.127594776  | 0.058 | 0.032 | 0.0002703 | 1.4 |
| TEX9      | 1.13E-08 | 0.111542874  | 0.074 | 0.044 | 0.0002736 | 1.4 |
| EHBP1     | 1.16E-08 | 0.105910949  | 0.4   | 0.323 | 0.0002792 | 1.4 |
| S100P     | 1.16E-08 | -0.13695774  | 0.015 | 0.039 | 0.0002807 | 1.4 |
| PFDN1     | 1.19E-08 | -0.234938567 | 0.198 | 0.247 | 0.0002869 | 1.4 |
| RPS23     | 1.21E-08 | -0.146191268 | 0.975 | 0.987 | 0.0002919 | 1.4 |
| AP001439. | 1.25E-08 | -0.202836969 | 0.063 | 0.101 | 0.0003009 | 1.4 |
| SAR1A     | 1.25E-08 | -0.23725903  | 0.178 | 0.225 | 0.0003017 | 1.4 |
| GCNT1     | 1.28E-08 | -0.245708228 | 0.064 | 0.101 | 0.0003086 | 1.4 |
| RPLP1     | 1.29E-08 | 0.110281029  | 0.318 | 0.251 | 0.0003118 | 1.4 |
| KIAA1033  | 1.35E-08 | 0.130541398  | 0.139 | 0.096 | 0.0003257 | 1.4 |
| GNL2      | 1.37E-08 | -0.175259177 | 0.073 | 0.113 | 0.0003302 | 1.4 |
| LONP2     | 1.40E-08 | 0.105430684  | 0.266 | 0.203 | 0.000337  | 1.4 |
| HMGAI     | 1.40E-08 | -0.345824017 | 0.104 | 0.147 | 0.0003377 | 1.4 |
| KCNQ5     | 1.41E-08 | -0.217874602 | 0.044 | 0.078 | 0.0003398 | 1.4 |
| OPA1      | 1.46E-08 | 0.136676222  | 0.144 | 0.101 | 0.0003531 | 1.4 |
| FOS       | 1.50E-08 | 0.136897092  | 0.291 | 0.227 | 0.0003622 | 1.4 |
| CCZ1B     | 1.54E-08 | 0.10172775   | 0.066 | 0.038 | 0.0003724 | 1.4 |
| GTF2H2C   | 1.56E-08 | 0.107280307  | 0.081 | 0.049 | 0.0003757 | 1.4 |
| CELF2     | 1.61E-08 | -0.298277682 | 0.214 | 0.262 | 0.000388  | 1.4 |
| RP11-481C | 1.62E-08 | -0.178134114 | 0.039 | 0.072 | 0.0003916 | 1.4 |
| CA12      | 1.63E-08 | -0.339913411 | 0.197 | 0.245 | 0.0003927 | 1.4 |
| SRPK2     | 1.64E-08 | -0.311208358 | 0.351 | 0.388 | 0.0003948 | 1.4 |
| RPL3      | 1.68E-08 | 0.137969075  | 0.42  | 0.343 | 0.0004058 | 1.4 |
| DNAJC8    | 1.68E-08 | -0.256235388 | 0.194 | 0.24  | 0.000406  | 1.4 |
| PPM1A     | 1.70E-08 | 0.108929349  | 0.164 | 0.117 | 0.0004089 | 1.4 |
| ZHX2      | 1.71E-08 | 0.10162388   | 0.409 | 0.328 | 0.000412  | 1.4 |
| SUZ12     | 1.73E-08 | 0.13401231   | 0.224 | 0.169 | 0.0004179 | 1.4 |
| SPPL2A    | 1.78E-08 | 0.102341799  | 0.244 | 0.185 | 0.0004303 | 1.4 |
| METTL16   | 1.79E-08 | 0.116320753  | 0.229 | 0.172 | 0.000431  | 1.4 |
| GNPAT     | 1.80E-08 | 0.104843241  | 0.085 | 0.053 | 0.0004331 | 1.4 |
| ERC2      | 1.86E-08 | 0.10664882   | 0.121 | 0.081 | 0.0004486 | 1.4 |
| TBC1D10A  | 1.91E-08 | -0.447280805 | 0.087 | 0.127 | 0.0004602 | 1.4 |
| SH3BGRL3  | 2.05E-08 | -0.24902234  | 0.03  | 0.059 | 0.0004953 | 1.4 |
| ARHGAP24  | 2.11E-08 | 0.105721097  | 0.07  | 0.041 | 0.0005092 | 1.4 |
| RNMT      | 2.13E-08 | -0.274543645 | 0.344 | 0.383 | 0.0005127 | 1.4 |
| INSR      | 2.27E-08 | 0.101196668  | 0.717 | 0.627 | 0.0005466 | 1.4 |
| NFATC2IP  | 2.35E-08 | 0.106202955  | 0.1   | 0.065 | 0.0005675 | 1.4 |
| NFIL3     | 2.35E-08 | -0.251133765 | 0.124 | 0.167 | 0.0005676 | 1.4 |
| SPG7      | 2.40E-08 | 0.112161163  | 0.081 | 0.049 | 0.0005785 | 1.4 |
| PLXNA2    | 2.63E-08 | 0.1008494    | 0.06  | 0.034 | 0.0006339 | 1.4 |

|           |          |              |       |       |           |     |
|-----------|----------|--------------|-------|-------|-----------|-----|
| XDH       | 3.50E-08 | 0.190017932  | 0.149 | 0.105 | 0.0008435 | 1.4 |
| OTUD3     | 3.51E-08 | -0.146717075 | 0.027 | 0.055 | 0.0008469 | 1.4 |
| CHD9      | 3.64E-08 | 0.119104395  | 0.532 | 0.447 | 0.0008777 | 1.4 |
| DAPL1     | 3.73E-08 | -0.197269365 | 0.029 | 0.057 | 0.0008987 | 1.4 |
| TNFRSF11A | 3.74E-08 | -0.272240771 | 0.103 | 0.143 | 0.0009022 | 1.4 |
| GGACT     | 3.76E-08 | -0.215674296 | 0.137 | 0.181 | 0.0009055 | 1.4 |
| P4HA1     | 3.79E-08 | -0.368464865 | 0.238 | 0.282 | 0.0009142 | 1.4 |
| TPR       | 3.95E-08 | 0.101502606  | 0.195 | 0.145 | 0.0009532 | 1.4 |
| TBX19     | 4.21E-08 | 0.106482756  | 0.127 | 0.087 | 0.0010163 | 1.4 |
| WSB1      | 4.25E-08 | -0.408926188 | 0.31  | 0.347 | 0.001024  | 1.4 |
| RPL32     | 4.31E-08 | -0.142917165 | 0.975 | 0.989 | 0.00104   | 1.4 |
| NTRK2     | 4.35E-08 | 0.113562928  | 0.23  | 0.173 | 0.0010496 | 1.4 |
| SOCS5     | 4.69E-08 | 0.123555055  | 0.206 | 0.154 | 0.0011311 | 1.4 |
| CHMP2B    | 4.73E-08 | -0.202459797 | 0.086 | 0.125 | 0.0011414 | 1.4 |
| CAPZA2    | 5.09E-08 | -0.275726324 | 0.298 | 0.34  | 0.0012274 | 1.4 |
| F11R      | 5.48E-08 | -0.215796128 | 0.143 | 0.187 | 0.001322  | 1.4 |
| MICU2     | 5.54E-08 | 0.101197094  | 0.166 | 0.119 | 0.0013359 | 1.4 |
| CEBPG     | 5.66E-08 | -0.102265456 | 0.024 | 0.05  | 0.0013643 | 1.4 |
| HM13      | 5.78E-08 | 0.10415994   | 0.194 | 0.143 | 0.0013929 | 1.4 |
| CRABP2    | 5.89E-08 | -0.170983363 | 0.057 | 0.092 | 0.0014205 | 1.4 |
| SCFD1     | 5.94E-08 | 0.12191534   | 0.27  | 0.211 | 0.0014334 | 1.4 |
| SMG1      | 5.95E-08 | -0.284540405 | 0.227 | 0.269 | 0.0014339 | 1.4 |
| KLK10     | 6.23E-08 | -0.174988196 | 0.037 | 0.067 | 0.0015012 | 1.4 |
| SLK       | 6.24E-08 | -0.212198899 | 0.104 | 0.145 | 0.0015056 | 1.4 |
| EEF2      | 6.30E-08 | 0.160313013  | 0.503 | 0.425 | 0.0015198 | 1.4 |
| BNIP3L    | 6.47E-08 | -0.242722761 | 0.275 | 0.319 | 0.0015607 | 1.4 |
| MLLT10    | 6.52E-08 | 0.108142711  | 0.203 | 0.151 | 0.0015716 | 1.4 |
| H3F3B     | 6.52E-08 | 0.112554889  | 0.456 | 0.376 | 0.0015727 | 1.4 |
| MIRLET7B  | 6.81E-08 | 0.121493509  | 0.052 | 0.029 | 0.0016413 | 1.4 |
| KIAA0040  | 6.86E-08 | 0.120782031  | 0.086 | 0.054 | 0.0016533 | 1.4 |
| NFAT5     | 7.05E-08 | -0.255819096 | 0.624 | 0.627 | 0.0017003 | 1.4 |
| RNF13     | 7.07E-08 | 0.10131144   | 0.351 | 0.282 | 0.0017039 | 1.4 |
| XYLT1     | 8.10E-08 | 0.168894915  | 0.147 | 0.105 | 0.0019541 | 1.4 |
| NRF1      | 8.12E-08 | 0.108311694  | 0.158 | 0.114 | 0.001958  | 1.4 |
| ESRRG     | 8.52E-08 | 0.120273143  | 0.05  | 0.027 | 0.0020543 | 1.4 |
| TUBB4B    | 8.62E-08 | -0.137435554 | 0.034 | 0.063 | 0.0020782 | 1.4 |
| PFN1      | 8.74E-08 | -0.223850084 | 0.147 | 0.188 | 0.0021067 | 1.4 |
| DLG5      | 9.12E-08 | 0.138961485  | 0.207 | 0.158 | 0.0022    | 1.4 |
| MYO9B     | 9.46E-08 | -0.273086392 | 0.17  | 0.213 | 0.0022803 | 1.4 |
| MAPKAP1   | 9.47E-08 | 0.106119301  | 0.128 | 0.089 | 0.0022827 | 1.4 |
| ATXN2     | 9.69E-08 | 0.113003645  | 0.333 | 0.264 | 0.0023366 | 1.4 |
| CLDND1    | 1.00E-07 | -0.207464048 | 0.181 | 0.227 | 0.0024187 | 1.4 |
| AUH       | 1.01E-07 | -0.419073202 | 0.317 | 0.346 | 0.002439  | 1.4 |
| B3GALT5   | 1.03E-07 | 0.100179173  | 0.077 | 0.048 | 0.0024912 | 1.4 |
| C11orf49  | 1.05E-07 | 0.101289088  | 0.176 | 0.13  | 0.0025406 | 1.4 |
| SMARCC1   | 1.06E-07 | 0.147973653  | 0.297 | 0.237 | 0.0025482 | 1.4 |
| RBBP4     | 1.14E-07 | 0.104155573  | 0.206 | 0.155 | 0.0027491 | 1.4 |

|           |          |              |       |       |           |     |
|-----------|----------|--------------|-------|-------|-----------|-----|
| CHD8      | 1.14E-07 | 0.107046472  | 0.121 | 0.083 | 0.0027515 | 1.4 |
| RPL39     | 1.16E-07 | -0.105148307 | 0.933 | 0.947 | 0.0027943 | 1.4 |
| SPINK5    | 1.17E-07 | -0.143497044 | 0.007 | 0.024 | 0.0028249 | 1.4 |
| MAPK6     | 1.20E-07 | -0.230750624 | 0.181 | 0.225 | 0.0028858 | 1.4 |
| AKT3      | 1.24E-07 | -0.343795906 | 0.46  | 0.482 | 0.0029833 | 1.4 |
| PATL1     | 1.28E-07 | 0.106065194  | 0.185 | 0.138 | 0.0030917 | 1.4 |
| PTPN9     | 1.29E-07 | 0.100289918  | 0.098 | 0.065 | 0.0031092 | 1.4 |
| CALU      | 1.31E-07 | -0.263154707 | 0.263 | 0.304 | 0.0031616 | 1.4 |
| ATP5G1    | 1.34E-07 | -0.249707486 | 0.175 | 0.218 | 0.0032422 | 1.4 |
| RPF2      | 1.37E-07 | -0.228557138 | 0.151 | 0.193 | 0.003307  | 1.4 |
| KHDRBS1   | 1.41E-07 | -0.248179716 | 0.265 | 0.304 | 0.0034082 | 1.4 |
| IQCB1     | 1.53E-07 | 0.117150406  | 0.127 | 0.089 | 0.003696  | 1.4 |
| SLIRP     | 1.61E-07 | -0.282250082 | 0.309 | 0.345 | 0.003894  | 1.4 |
| FAM162A   | 1.65E-07 | -0.193703964 | 0.113 | 0.154 | 0.0039686 | 1.4 |
| AGO3      | 1.66E-07 | 0.108670224  | 0.294 | 0.232 | 0.0040047 | 1.4 |
| TNFAIP3   | 1.68E-07 | -0.304101095 | 0.222 | 0.265 | 0.004052  | 1.4 |
| GPS2      | 1.71E-07 | -0.200718515 | 0.087 | 0.124 | 0.004118  | 1.4 |
| TCF25     | 1.71E-07 | 0.101865326  | 0.143 | 0.102 | 0.0041289 | 1.4 |
| PCGF5     | 1.74E-07 | -0.238906262 | 0.15  | 0.192 | 0.0041908 | 1.4 |
| LINC00511 | 1.77E-07 | 0.196759811  | 0.15  | 0.11  | 0.0042669 | 1.4 |
| TRIM2     | 1.79E-07 | -0.225050351 | 0.269 | 0.316 | 0.0043183 | 1.4 |
| ACTG1     | 1.94E-07 | -0.342293896 | 0.689 | 0.7   | 0.00468   | 1.4 |
| GRB10     | 1.96E-07 | 0.194746285  | 0.168 | 0.126 | 0.0047224 | 1.4 |
| MYO1B     | 1.96E-07 | 0.10977287   | 0.384 | 0.314 | 0.0047347 | 1.4 |
| ZDHHC17   | 2.02E-07 | 0.114909902  | 0.122 | 0.084 | 0.0048625 | 1.4 |
| DCTN4     | 2.02E-07 | 0.106553606  | 0.207 | 0.158 | 0.0048816 | 1.4 |
| SCAI      | 2.14E-07 | 0.119704239  | 0.111 | 0.076 | 0.005152  | 1.4 |
| ACTR10    | 2.16E-07 | 0.107655579  | 0.16  | 0.117 | 0.0052203 | 1.4 |
| RAB2A     | 2.20E-07 | 0.10873471   | 0.32  | 0.256 | 0.0053022 | 1.4 |
| WBP5      | 2.23E-07 | -0.265899939 | 0.374 | 0.403 | 0.0053864 | 1.4 |
| VDAC1     | 2.24E-07 | -0.21789625  | 0.186 | 0.228 | 0.0054122 | 1.4 |
| CAP1      | 2.25E-07 | -0.231191733 | 0.197 | 0.239 | 0.0054261 | 1.4 |
| SHOC2     | 2.30E-07 | 0.116139788  | 0.261 | 0.206 | 0.0055422 | 1.4 |
| PRELID2   | 2.38E-07 | -0.209851981 | 0.053 | 0.085 | 0.0057389 | 1.4 |
| RREB1     | 2.51E-07 | 0.105167443  | 0.31  | 0.248 | 0.0060422 | 1.4 |
| KDM7A     | 2.54E-07 | 0.133641642  | 0.394 | 0.325 | 0.0061359 | 1.4 |
| DENND2C   | 2.55E-07 | -0.129586539 | 0.023 | 0.048 | 0.0061382 | 1.4 |
| GJA1      | 2.55E-07 | -0.211790354 | 0.038 | 0.065 | 0.0061545 | 1.4 |
| RAB7A     | 2.67E-07 | -0.262820037 | 0.365 | 0.398 | 0.0064296 | 1.4 |
| MRPL47    | 2.70E-07 | -0.212084199 | 0.156 | 0.198 | 0.0065081 | 1.4 |
| KRAS      | 2.73E-07 | -0.199198839 | 0.113 | 0.153 | 0.0065874 | 1.4 |
| MT2A      | 2.75E-07 | 0.18764221   | 0.1   | 0.067 | 0.0066291 | 1.4 |
| DFNB59    | 2.76E-07 | 0.146386066  | 0.033 | 0.015 | 0.0066657 | 1.4 |
| NDUFAF4   | 2.89E-07 | -0.190953031 | 0.085 | 0.121 | 0.0069614 | 1.4 |
| TSLP      | 2.89E-07 | -0.173550079 | 0.052 | 0.084 | 0.0069659 | 1.4 |
| BRIX1     | 2.92E-07 | -0.221012414 | 0.095 | 0.133 | 0.0070478 | 1.4 |
| ANKLE2    | 2.93E-07 | -0.155908581 | 0.088 | 0.125 | 0.0070613 | 1.4 |

|           |          |              |       |       |           |     |
|-----------|----------|--------------|-------|-------|-----------|-----|
| NBEAL1    | 2.95E-07 | 0.140256849  | 0.742 | 0.668 | 0.0071117 | 1.4 |
| TLE1      | 2.98E-07 | -0.230176179 | 0.194 | 0.239 | 0.0071805 | 1.4 |
| FAM160A1  | 3.10E-07 | -0.286689352 | 0.716 | 0.695 | 0.0074744 | 1.4 |
| AFF4      | 3.18E-07 | -0.27571417  | 0.412 | 0.436 | 0.0076706 | 1.4 |
| PSEN1     | 3.23E-07 | 0.131233758  | 0.257 | 0.203 | 0.0077913 | 1.4 |
| RASGEF1B  | 3.31E-07 | -0.218852003 | 0.901 | 0.892 | 0.00797   | 1.4 |
| TMX4      | 3.43E-07 | 0.107164796  | 0.066 | 0.04  | 0.0082598 | 1.4 |
| FAR1      | 3.46E-07 | -0.177805826 | 0.084 | 0.121 | 0.0083486 | 1.4 |
| LATS2     | 3.52E-07 | -0.176806495 | 0.092 | 0.13  | 0.008487  | 1.4 |
| LURAP1L-A | 3.57E-07 | -0.164333755 | 0.066 | 0.1   | 0.0086131 | 1.4 |
| HMOX1     | 3.58E-07 | -0.28550577  | 0.042 | 0.071 | 0.0086278 | 1.4 |
| LRRC59    | 3.91E-07 | -0.108603368 | 0.032 | 0.058 | 0.0094324 | 1.4 |
| KANSL3    | 4.25E-07 | 0.104379004  | 0.085 | 0.056 | 0.010257  | 1.4 |
| HNRNPA3   | 4.51E-07 | -0.238354003 | 0.315 | 0.35  | 0.0108719 | 1.4 |
| HMGB1     | 4.63E-07 | 0.113441656  | 0.599 | 0.519 | 0.0111538 | 1.4 |
| RP11-511B | 4.69E-07 | -0.193200545 | 0.585 | 0.591 | 0.0113065 | 1.4 |
| GTPBP4    | 4.74E-07 | -0.217972635 | 0.109 | 0.147 | 0.0114309 | 1.4 |
| FAM193A   | 5.04E-07 | 0.104572362  | 0.181 | 0.136 | 0.0121505 | 1.4 |
| PIP       | 5.41E-07 | -0.184262242 | 0.032 | 0.058 | 0.0130376 | 1.4 |
| ARHGAP12  | 6.27E-07 | -0.279379973 | 0.314 | 0.348 | 0.0151073 | 1.4 |
| UBR2      | 6.47E-07 | 0.123899317  | 0.365 | 0.3   | 0.0155947 | 1.4 |
| ZBTB43    | 6.58E-07 | -0.239350234 | 0.131 | 0.169 | 0.0158718 | 1.4 |
| RTKN2     | 6.84E-07 | -0.120329389 | 0.019 | 0.041 | 0.0164913 | 1.4 |
| CA2       | 7.23E-07 | -0.177216981 | 0.047 | 0.076 | 0.0174291 | 1.4 |
| HNRNPDL   | 8.32E-07 | -0.219916875 | 0.273 | 0.313 | 0.0200601 | 1.4 |
| ATP6VOA1  | 8.42E-07 | -0.22169291  | 0.143 | 0.182 | 0.0203021 | 1.4 |
| LDHC      | 8.83E-07 | -0.107455757 | 0.012 | 0.031 | 0.0212902 | 1.4 |
| CXCR4     | 8.89E-07 | -0.540965679 | 0.275 | 0.307 | 0.0214317 | 1.4 |
| ARL5B     | 9.29E-07 | -0.158766604 | 0.051 | 0.08  | 0.0224017 | 1.4 |
| PFDN2     | 9.86E-07 | -0.158320864 | 0.055 | 0.086 | 0.0237785 | 1.4 |
| KIAA0825  | 1.02E-06 | 0.100781077  | 0.071 | 0.045 | 0.0244845 | 1.4 |
| NMNAT2    | 1.03E-06 | 0.120800759  | 0.05  | 0.029 | 0.0248975 | 1.4 |
| PERP      | 1.08E-06 | -0.246515401 | 0.306 | 0.336 | 0.0259563 | 1.4 |
| CSNK1G3   | 1.09E-06 | 0.103363714  | 0.125 | 0.089 | 0.0262912 | 1.4 |
| CA5B      | 1.10E-06 | -0.195479451 | 0.107 | 0.143 | 0.0264696 | 1.4 |
| SEMA3C    | 1.12E-06 | -0.198568982 | 0.046 | 0.075 | 0.0271236 | 1.4 |
| PUM2      | 1.13E-06 | -0.267587472 | 0.335 | 0.363 | 0.0273575 | 1.4 |
| NF2       | 1.14E-06 | -0.122165304 | 0.046 | 0.075 | 0.0275528 | 1.4 |
| HNRNPD    | 1.18E-06 | -0.242402631 | 0.264 | 0.298 | 0.0283596 | 1.4 |
| AC037445. | 1.25E-06 | -0.1051684   | 0.016 | 0.037 | 0.030031  | 1.4 |
| BTA1F1    | 1.27E-06 | -0.268966043 | 0.219 | 0.257 | 0.0306978 | 1.4 |
| SPTBN1    | 1.27E-06 | 0.111389405  | 0.239 | 0.189 | 0.0307026 | 1.4 |
| PRKDC     | 1.34E-06 | 0.109631593  | 0.141 | 0.104 | 0.0322515 | 1.4 |
| MPRIP     | 1.34E-06 | -0.224927642 | 0.198 | 0.239 | 0.0323506 | 1.4 |
| WDR1      | 1.37E-06 | -0.156470677 | 0.114 | 0.152 | 0.0330604 | 1.4 |
| DSC3      | 1.43E-06 | -0.151716516 | 0.019 | 0.039 | 0.0345553 | 1.4 |
| ETS2      | 1.54E-06 | -0.203421868 | 0.099 | 0.135 | 0.0370498 | 1.4 |

|           |          |              |       |       |           |     |
|-----------|----------|--------------|-------|-------|-----------|-----|
| RPS5      | 1.59E-06 | 0.146901687  | 0.333 | 0.275 | 0.0383272 | 1.4 |
| SLC7A11   | 1.74E-06 | -0.123935788 | 0.031 | 0.055 | 0.0419093 | 1.4 |
| STX3      | 1.74E-06 | -0.172539085 | 0.075 | 0.108 | 0.0419332 | 1.4 |
| SERINC1   | 1.77E-06 | -0.226276668 | 0.28  | 0.316 | 0.0426303 | 1.4 |
| ACTG2     | 1.81E-06 | -0.137326837 | 0.005 | 0.02  | 0.043619  | 1.4 |
| SENP7     | 1.81E-06 | 0.124789926  | 0.15  | 0.112 | 0.0437094 | 1.4 |
| DIAPH1    | 1.82E-06 | -0.229065292 | 0.183 | 0.224 | 0.0438698 | 1.4 |
| DDX47     | 1.90E-06 | -0.131722274 | 0.029 | 0.053 | 0.0458174 | 1.4 |
| ITGB5-AS1 | 1.92E-06 | -0.21707117  | 0.024 | 0.046 | 0.0463998 | 1.4 |
| MAP4K5    | 2.02E-06 | -0.305846733 | 0.343 | 0.372 | 0.04865   | 1.4 |
| TMOD3     | 2.12E-06 | -0.230738294 | 0.258 | 0.297 | 0.0511513 | 1.4 |
| RP4-605O3 | 2.17E-06 | 0.121281995  | 0.124 | 0.09  | 0.052305  | 1.4 |
| CAV1      | 2.19E-06 | -0.167587759 | 0.041 | 0.067 | 0.0527907 | 1.4 |
| TMED2     | 2.24E-06 | -0.174894543 | 0.127 | 0.165 | 0.053913  | 1.4 |
| ARHGEF12  | 2.28E-06 | -0.262331831 | 0.412 | 0.44  | 0.0549963 | 1.4 |
| CYYR1     | 2.30E-06 | 0.100357458  | 0.1   | 0.069 | 0.0554773 | 1.4 |
| KRT5      | 2.41E-06 | -0.101729655 | 0.015 | 0.034 | 0.0580676 | 1.4 |
| PSMA4     | 2.59E-06 | 0.109481897  | 0.565 | 0.479 | 0.0623979 | 1.4 |
| MED21     | 2.63E-06 | -0.259180039 | 0.212 | 0.247 | 0.0633242 | 1.4 |
| TUFT1     | 2.87E-06 | -0.200314664 | 0.124 | 0.159 | 0.0691634 | 1.4 |
| PABPC1    | 2.97E-06 | -0.163149974 | 0.811 | 0.782 | 0.0715575 | 1.4 |
| CXADR     | 3.00E-06 | 0.106694942  | 0.269 | 0.216 | 0.072295  | 1.4 |
| PDE1C     | 3.02E-06 | 0.125626371  | 0.103 | 0.072 | 0.0728859 | 1.4 |
| ASNS      | 3.21E-06 | -0.134628767 | 0.06  | 0.09  | 0.0773651 | 1.4 |
| GNB1      | 3.23E-06 | -0.201122892 | 0.262 | 0.299 | 0.0779224 | 1.4 |
| EXOSC8    | 3.61E-06 | -0.186651075 | 0.122 | 0.159 | 0.086996  | 1.4 |
| ATP5G2    | 3.62E-06 | -0.260099036 | 0.819 | 0.773 | 0.0872989 | 1.4 |
| CDH3      | 3.63E-06 | 0.103889883  | 0.177 | 0.137 | 0.087614  | 1.4 |
| NAA50     | 3.64E-06 | -0.225667902 | 0.187 | 0.225 | 0.0878752 | 1.4 |
| AKAP10    | 3.81E-06 | 0.112874117  | 0.136 | 0.1   | 0.091887  | 1.4 |
| GNAS      | 3.83E-06 | -0.214870109 | 0.603 | 0.598 | 0.0922928 | 1.4 |
| SGK1      | 3.83E-06 | -0.256949234 | 0.151 | 0.187 | 0.0923893 | 1.4 |
| EFNB2     | 4.04E-06 | -0.151424181 | 0.098 | 0.133 | 0.0974015 | 1.4 |
| SAV1      | 4.14E-06 | 0.123124792  | 0.421 | 0.359 | 0.0998113 | 1.4 |
| TGFBR2    | 4.18E-06 | -0.200049712 | 0.102 | 0.135 | 0.1007216 | 1.4 |
| MGLL      | 4.27E-06 | -0.124894504 | 0.047 | 0.074 | 0.1029765 | 1.4 |
| PDIA3     | 4.31E-06 | -0.290767731 | 0.246 | 0.279 | 0.1039585 | 1.4 |
| KTN1      | 4.41E-06 | -0.242365168 | 0.384 | 0.402 | 0.1064008 | 1.4 |
| PITPNB    | 4.50E-06 | -0.255429785 | 0.293 | 0.323 | 0.1085325 | 1.4 |
| OSBPL10   | 4.70E-06 | -0.182799887 | 0.108 | 0.143 | 0.1132396 | 1.4 |
| KRT6B     | 4.79E-06 | -0.358305061 | 0.096 | 0.128 | 0.1154238 | 1.4 |
| MRPL24    | 4.83E-06 | -0.13637813  | 0.044 | 0.069 | 0.1163963 | 1.4 |
| MEST      | 4.87E-06 | -0.124012147 | 0.022 | 0.043 | 0.1173503 | 1.4 |
| TFG       | 5.12E-06 | -0.259372977 | 0.289 | 0.32  | 0.1235392 | 1.4 |
| RANBP2    | 5.24E-06 | -0.249597524 | 0.253 | 0.286 | 0.1262834 | 1.4 |
| KIF13B    | 5.35E-06 | -0.259807744 | 0.269 | 0.304 | 0.1290196 | 1.4 |
| HSPH1     | 5.59E-06 | -0.222891139 | 0.099 | 0.132 | 0.1349004 | 1.4 |

|           |          |              |       |       |           |     |
|-----------|----------|--------------|-------|-------|-----------|-----|
| POU2F3    | 5.92E-06 | 0.111295474  | 0.2   | 0.157 | 0.1428609 | 1.4 |
| PRSS8     | 6.12E-06 | -0.302858411 | 0.043 | 0.068 | 0.147548  | 1.4 |
| ARID1A    | 6.35E-06 | 0.100238518  | 0.245 | 0.197 | 0.153131  | 1.4 |
| COTL1     | 6.40E-06 | -0.109544659 | 0.026 | 0.047 | 0.1544203 | 1.4 |
| MTRNR2L1  | 6.59E-06 | -0.260839942 | 0.255 | 0.29  | 0.1588038 | 1.4 |
| ENY2      | 6.88E-06 | -0.246918566 | 0.408 | 0.425 | 0.1658168 | 1.4 |
| EPC1      | 7.09E-06 | 0.118777038  | 0.172 | 0.132 | 0.1709507 | 1.4 |
| PPP3CA    | 7.27E-06 | -0.286787423 | 0.396 | 0.419 | 0.1752154 | 1.4 |
| DNAJB6    | 7.62E-06 | -0.267560924 | 0.329 | 0.358 | 0.1837338 | 1.4 |
| LMTK2     | 7.96E-06 | -0.196037636 | 0.13  | 0.165 | 0.1919124 | 1.4 |
| ZFAND1    | 7.96E-06 | -0.218600827 | 0.253 | 0.287 | 0.1920199 | 1.4 |
| NARS      | 8.70E-06 | -0.236165913 | 0.266 | 0.298 | 0.2098799 | 1.4 |
| TIPARP    | 8.82E-06 | -0.138709164 | 0.078 | 0.109 | 0.2125588 | 1.4 |
| RPL4      | 8.97E-06 | -0.126261529 | 0.959 | 0.957 | 0.2162926 | 1.4 |
| PDCD10    | 1.04E-05 | -0.202571784 | 0.26  | 0.297 | 0.2518126 | 1.4 |
| LINC00866 | 1.06E-05 | -0.157003008 | 0.008 | 0.023 | 0.2560274 | 1.4 |
| RNF115    | 1.06E-05 | -0.345781681 | 0.217 | 0.247 | 0.2563323 | 1.4 |
| MSMO1     | 1.07E-05 | -0.256440647 | 0.244 | 0.279 | 0.2591873 | 1.4 |
| LAMTOR3   | 1.08E-05 | -0.167947553 | 0.117 | 0.15  | 0.2592426 | 1.4 |
| STX12     | 1.09E-05 | -0.328410473 | 0.44  | 0.452 | 0.2639942 | 1.4 |
| PCNP      | 1.12E-05 | -0.222785796 | 0.354 | 0.377 | 0.2697448 | 1.4 |
| LDLRAD3   | 1.14E-05 | 0.117319961  | 0.341 | 0.287 | 0.2756902 | 1.4 |
| ATXN1     | 1.19E-05 | -0.349310028 | 0.347 | 0.368 | 0.2863534 | 1.4 |
| ZNF219    | 1.19E-05 | -0.103201874 | 0.04  | 0.064 | 0.2864141 | 1.4 |
| BAG5      | 1.19E-05 | -0.13793231  | 0.093 | 0.126 | 0.2867439 | 1.4 |
| CTR9      | 1.19E-05 | -0.175654866 | 0.071 | 0.1   | 0.2876382 | 1.4 |
| VIM       | 1.19E-05 | -0.239948528 | 0.183 | 0.218 | 0.2876977 | 1.4 |
| SCD5      | 1.28E-05 | -0.143373995 | 0.044 | 0.069 | 0.3084956 | 1.4 |
| ATP8B1    | 1.29E-05 | -0.338310806 | 0.312 | 0.339 | 0.3113301 | 1.4 |
| CD55      | 1.29E-05 | -0.252591969 | 0.359 | 0.386 | 0.3119391 | 1.4 |
| PGM3      | 1.30E-05 | -0.175197427 | 0.089 | 0.119 | 0.3138373 | 1.4 |
| PGM2L1    | 1.32E-05 | -0.153925726 | 0.086 | 0.117 | 0.3172234 | 1.4 |
| AP006222. | 1.32E-05 | -0.100653347 | 0.024 | 0.044 | 0.3181298 | 1.4 |
| FBXL2     | 1.32E-05 | -0.198689382 | 0.079 | 0.108 | 0.3186927 | 1.4 |
| NXF1      | 1.43E-05 | -0.133078429 | 0.062 | 0.09  | 0.3448481 | 1.4 |
| SLC26A3   | 1.55E-05 | -0.191319571 | 0.76  | 0.762 | 0.3734841 | 1.4 |
| IGFBP5    | 1.55E-05 | -0.199984348 | 0.047 | 0.072 | 0.3739465 | 1.4 |
| CBL       | 1.56E-05 | -0.139889014 | 0.071 | 0.1   | 0.3771519 | 1.4 |
| MARS      | 1.66E-05 | -0.143582642 | 0.11  | 0.143 | 0.3992345 | 1.4 |
| KANSL1    | 1.66E-05 | 0.105559773  | 0.425 | 0.367 | 0.400547  | 1.4 |
| COL6A1    | 1.68E-05 | -0.146827119 | 0.03  | 0.051 | 0.4052667 | 1.4 |
| CXCL3     | 1.87E-05 | -0.249475633 | 0.071 | 0.099 | 0.4506227 | 1.4 |
| PARD6B    | 1.93E-05 | -0.142751042 | 0.118 | 0.151 | 0.4664881 | 1.4 |
| ZDHHC9    | 1.97E-05 | -0.181651066 | 0.107 | 0.139 | 0.4740401 | 1.4 |
| CCDC126   | 2.00E-05 | -0.136406772 | 0.05  | 0.075 | 0.4816614 | 1.4 |
| RAB9A     | 2.06E-05 | -0.19423053  | 0.181 | 0.216 | 0.4956925 | 1.4 |
| TAB2      | 2.11E-05 | -0.215064933 | 0.245 | 0.279 | 0.5093502 | 1.4 |



|            |          |              |       |       |           |     |
|------------|----------|--------------|-------|-------|-----------|-----|
| ISG20      | 2.21E-05 | -0.136240646 | 0.033 | 0.054 | 0.5323883 | 1.4 |
| TIMM17A    | 2.33E-05 | -0.222090287 | 0.198 | 0.23  | 0.5611025 | 1.4 |
| SCAF4      | 2.40E-05 | -0.128812184 | 0.063 | 0.09  | 0.5788317 | 1.4 |
| TUBB       | 2.43E-05 | -0.229655762 | 0.328 | 0.357 | 0.5849251 | 1.4 |
| FUT11      | 2.43E-05 | -0.123774769 | 0.057 | 0.083 | 0.5849432 | 1.4 |
| ALKBH5     | 2.43E-05 | -0.111710572 | 0.051 | 0.076 | 0.5867652 | 1.4 |
| RAB14      | 2.43E-05 | -0.172389539 | 0.099 | 0.13  | 0.5871271 | 1.4 |
| RP1-313I6. | 2.45E-05 | -0.146982745 | 0.046 | 0.07  | 0.5899839 | 1.4 |
| RNF10      | 2.47E-05 | -0.170990775 | 0.145 | 0.178 | 0.5967028 | 1.4 |
| SMAD3      | 2.61E-05 | -0.174404629 | 0.101 | 0.132 | 0.6287793 | 1.4 |
| CTD-2528L  | 2.63E-05 | -0.115379481 | 0.024 | 0.042 | 0.6338329 | 1.4 |
| NHSL1      | 2.75E-05 | -0.407254635 | 0.177 | 0.212 | 0.6630355 | 1.4 |
| INTS12     | 2.76E-05 | -0.231236786 | 0.17  | 0.202 | 0.664583  | 1.4 |
| CAMSAP1    | 2.81E-05 | -0.140948224 | 0.058 | 0.084 | 0.6786976 | 1.4 |
| METAP1     | 2.82E-05 | -0.139030607 | 0.07  | 0.098 | 0.680755  | 1.4 |
| LAMC2      | 2.87E-05 | -0.304772884 | 0.275 | 0.302 | 0.6922336 | 1.4 |
| CDA        | 2.90E-05 | -0.153192712 | 0.005 | 0.017 | 0.6995426 | 1.4 |
| GNB2L1     | 3.04E-05 | 0.100867236  | 0.756 | 0.697 | 0.7329328 | 1.4 |
| RIPK2      | 3.10E-05 | -0.318204831 | 0.382 | 0.402 | 0.748401  | 1.4 |
| CALR       | 3.11E-05 | -0.239907622 | 0.165 | 0.196 | 0.7501595 | 1.4 |
| PRDM10     | 3.13E-05 | -0.133569825 | 0.061 | 0.088 | 0.7538247 | 1.4 |
| TOMM7      | 3.14E-05 | -0.139931853 | 0.918 | 0.903 | 0.7561873 | 1.4 |
| FAM13A     | 3.18E-05 | -0.467505388 | 0.371 | 0.379 | 0.7670643 | 1.4 |
| TCEB3      | 3.20E-05 | -0.122223382 | 0.054 | 0.079 | 0.7711068 | 1.4 |
| SNRPB      | 3.23E-05 | -0.162406057 | 0.063 | 0.089 | 0.7788738 | 1.4 |
| CCNB1IP1   | 3.30E-05 | -0.227816958 | 0.355 | 0.374 | 0.7966473 | 1.4 |
| MAGT1      | 3.38E-05 | -0.196654287 | 0.156 | 0.187 | 0.8143963 | 1.4 |
| C4orf32    | 3.39E-05 | -0.142625089 | 0.044 | 0.067 | 0.8179906 | 1.4 |
| THSD4      | 3.40E-05 | -0.319102063 | 0.403 | 0.421 | 0.8186916 | 1.4 |
| UCHL3      | 3.47E-05 | -0.156942369 | 0.117 | 0.149 | 0.836071  | 1.4 |
| PSME2      | 3.48E-05 | 0.155092953  | 0.393 | 0.339 | 0.8392941 | 1.4 |
| S100A16    | 3.59E-05 | -0.21195727  | 0.08  | 0.108 | 0.8648809 | 1.4 |
| LALBA      | 3.70E-05 | -0.402384212 | 0.005 | 0.016 | 0.8915069 | 1.4 |
| NOLC1      | 3.70E-05 | -0.122696223 | 0.057 | 0.082 | 0.8931228 | 1.4 |
| PLIN2      | 3.78E-05 | -0.315256666 | 0.131 | 0.161 | 0.9111092 | 1.4 |
| TMEM57     | 3.86E-05 | -0.220147203 | 0.149 | 0.179 | 0.9305384 | 1.4 |
| RP11-111E  | 3.89E-05 | -0.10579965  | 0.045 | 0.069 | 0.9375248 | 1.4 |
| B4GALNT3   | 4.07E-05 | -0.172901061 | 0.034 | 0.055 | 0.9815425 | 1.4 |
| ZC3H15     | 4.26E-05 | -0.201891262 | 0.245 | 0.276 | 1         | 1.4 |
| COPS2      | 4.32E-05 | -0.230083339 | 0.34  | 0.359 | 1         | 1.4 |
| CSMD1      | 4.38E-05 | 0.124408467  | 0.097 | 0.07  | 1         | 1.4 |
| RAC1       | 4.69E-05 | -0.188385819 | 0.479 | 0.491 | 1         | 1.4 |
| ATP2B4     | 4.79E-05 | -0.338985311 | 0.256 | 0.279 | 1         | 1.4 |
| TPD52      | 4.79E-05 | -0.190699589 | 0.147 | 0.178 | 1         | 1.4 |
| MAFF       | 4.89E-05 | -0.199549359 | 0.179 | 0.211 | 1         | 1.4 |
| TMSB10     | 5.35E-05 | -0.370927195 | 0.637 | 0.624 | 1         | 1.4 |
| RP11-317G  | 5.55E-05 | -0.109469282 | 0.036 | 0.057 | 1         | 1.4 |

|           |          |              |       |       |   |     |
|-----------|----------|--------------|-------|-------|---|-----|
| MYO1E     | 5.63E-05 | -0.301798222 | 0.483 | 0.49  | 1 | 1.4 |
| ARMCX3    | 5.87E-05 | -0.155202989 | 0.126 | 0.158 | 1 | 1.4 |
| IPO5      | 6.44E-05 | -0.183283157 | 0.137 | 0.167 | 1 | 1.4 |
| PEAK1     | 6.47E-05 | -0.249607626 | 0.158 | 0.188 | 1 | 1.4 |
| JUND      | 6.53E-05 | -0.140272096 | 0.055 | 0.078 | 1 | 1.4 |
| PAK3      | 6.53E-05 | 0.133127195  | 0.106 | 0.079 | 1 | 1.4 |
| RBBP7     | 6.56E-05 | -0.101625623 | 0.061 | 0.086 | 1 | 1.4 |
| PGAM1     | 6.89E-05 | -0.114410887 | 0.083 | 0.112 | 1 | 1.4 |
| KLF5      | 6.91E-05 | -0.197064237 | 0.204 | 0.237 | 1 | 1.4 |
| KLRD1     | 6.99E-05 | -0.170277718 | 0.055 | 0.079 | 1 | 1.4 |
| CLCA4     | 7.10E-05 | -0.11376216  | 0.022 | 0.04  | 1 | 1.4 |
| WDR20     | 7.10E-05 | 0.104973395  | 0.108 | 0.081 | 1 | 1.4 |
| C1orf198  | 7.55E-05 | -0.128629928 | 0.048 | 0.07  | 1 | 1.4 |
| CAV2      | 8.35E-05 | -0.11976351  | 0.049 | 0.072 | 1 | 1.4 |
| CYTH3     | 8.48E-05 | -0.158698353 | 0.067 | 0.092 | 1 | 1.4 |
| FEZ2      | 8.55E-05 | -0.251008076 | 0.373 | 0.39  | 1 | 1.4 |
| LINGO2    | 8.91E-05 | -0.276080644 | 0.05  | 0.073 | 1 | 1.4 |
| EIF5A     | 9.01E-05 | -0.140144997 | 0.046 | 0.067 | 1 | 1.4 |
| ARHGEF26  | 9.66E-05 | -0.19004955  | 0.055 | 0.079 | 1 | 1.4 |
| PIGA      | 9.69E-05 | -0.153472275 | 0.066 | 0.09  | 1 | 1.4 |
| TAGLN     | 0.000103 | -0.22072563  | 0.014 | 0.029 | 1 | 1.4 |
| NUTF2     | 0.000103 | -0.108650206 | 0.052 | 0.075 | 1 | 1.4 |
| AREG      | 0.000103 | -0.16085501  | 0.079 | 0.105 | 1 | 1.4 |
| TPM3      | 0.000109 | -0.125011534 | 0.091 | 0.118 | 1 | 1.4 |
| FOXK1     | 0.000111 | -0.145093367 | 0.125 | 0.155 | 1 | 1.4 |
| COPB1     | 0.000112 | -0.175030439 | 0.192 | 0.22  | 1 | 1.4 |
| RP11-557C | 0.000118 | -0.144685833 | 0.045 | 0.066 | 1 | 1.4 |
| PPTC7     | 0.00012  | -0.285625385 | 0.197 | 0.224 | 1 | 1.4 |
| PALLD     | 0.000122 | -0.208724911 | 0.511 | 0.516 | 1 | 1.4 |
| RNF145    | 0.000122 | -0.359126384 | 0.582 | 0.557 | 1 | 1.4 |
| PJA2      | 0.000126 | -0.234654149 | 0.208 | 0.236 | 1 | 1.4 |
| RPL22     | 0.000127 | -0.150124032 | 0.816 | 0.787 | 1 | 1.4 |
| LIMA1     | 0.00013  | -0.233559292 | 0.362 | 0.379 | 1 | 1.4 |
| DHX15     | 0.000132 | -0.177946924 | 0.187 | 0.217 | 1 | 1.4 |
| COX6C     | 0.000135 | -0.167613698 | 0.632 | 0.625 | 1 | 1.4 |
| PCNXL2    | 0.000138 | -0.166097766 | 0.811 | 0.813 | 1 | 1.4 |
| PTP4A2    | 0.000145 | -0.146936903 | 0.095 | 0.122 | 1 | 1.4 |
| CCDC82    | 0.000149 | -0.199329563 | 0.229 | 0.258 | 1 | 1.4 |
| S100A1    | 0.00015  | -0.115056057 | 0.065 | 0.09  | 1 | 1.4 |
| F3        | 0.000151 | -0.155656879 | 0.047 | 0.069 | 1 | 1.4 |
| USP54     | 0.000157 | -0.11522363  | 0.581 | 0.49  | 1 | 1.4 |
| OSBPL6    | 0.000166 | -0.100917289 | 0.025 | 0.041 | 1 | 1.4 |
| SEC24B    | 0.000169 | -0.240714262 | 0.285 | 0.305 | 1 | 1.4 |
| CCDC50    | 0.00017  | -0.158596563 | 0.134 | 0.164 | 1 | 1.4 |
| PAFAH1B1  | 0.000172 | -0.225817274 | 0.354 | 0.374 | 1 | 1.4 |
| PFDN5     | 0.000175 | -0.119781077 | 0.901 | 0.896 | 1 | 1.4 |
| CENPW     | 0.000176 | -0.171673188 | 0.109 | 0.136 | 1 | 1.4 |

|            |          |              |       |       |   |     |
|------------|----------|--------------|-------|-------|---|-----|
| CDC27      | 0.000195 | -0.244618647 | 0.221 | 0.248 | 1 | 1.4 |
| BCCIP      | 0.000197 | -0.141919171 | 0.072 | 0.096 | 1 | 1.4 |
| CCDC59     | 0.000202 | -0.158880537 | 0.159 | 0.189 | 1 | 1.4 |
| RP11-314N  | 0.000207 | -0.228200016 | 0.126 | 0.153 | 1 | 1.4 |
| AIMP1      | 0.000208 | -0.209062361 | 0.407 | 0.426 | 1 | 1.4 |
| EIF4A1     | 0.000211 | -0.172794341 | 0.582 | 0.585 | 1 | 1.4 |
| EIF3H      | 0.000226 | -0.146041661 | 0.721 | 0.691 | 1 | 1.4 |
| DDX24      | 0.000228 | -0.188511103 | 0.639 | 0.621 | 1 | 1.4 |
| COX4I1     | 0.000232 | -0.145156086 | 0.807 | 0.775 | 1 | 1.4 |
| KCNMA1     | 0.000234 | -0.146766195 | 0.031 | 0.049 | 1 | 1.4 |
| RPS19      | 0.000235 | 0.206283231  | 0.294 | 0.253 | 1 | 1.4 |
| TNC        | 0.000236 | 0.135363583  | 0.135 | 0.107 | 1 | 1.4 |
| UBB        | 0.000251 | -0.214440395 | 0.802 | 0.767 | 1 | 1.4 |
| SPATA5     | 0.000251 | -0.164808848 | 0.114 | 0.142 | 1 | 1.4 |
| BRK1       | 0.000253 | -0.126284366 | 0.703 | 0.688 | 1 | 1.4 |
| KRT18      | 0.000258 | -0.142501802 | 0.067 | 0.09  | 1 | 1.4 |
| RP11-608O  | 0.000258 | -0.1140207   | 0.739 | 0.737 | 1 | 1.4 |
| IQCJ-SCHIP | 0.000259 | -0.114467441 | 0.059 | 0.082 | 1 | 1.4 |
| PFKFB3     | 0.000267 | -0.103350327 | 0.059 | 0.081 | 1 | 1.4 |
| DYNLRB1    | 0.000268 | -0.180167818 | 0.248 | 0.274 | 1 | 1.4 |
| SEC24D     | 0.000274 | -0.291614195 | 0.285 | 0.304 | 1 | 1.4 |
| MT-ND4L    | 0.000291 | -0.190742988 | 0.534 | 0.534 | 1 | 1.4 |
| POLR2K     | 0.0003   | -0.222624745 | 0.32  | 0.338 | 1 | 1.4 |
| RRP15      | 0.000301 | -0.100662924 | 0.053 | 0.075 | 1 | 1.4 |
| CCT8       | 0.000305 | -0.191385341 | 0.369 | 0.383 | 1 | 1.4 |
| ZBTB11     | 0.000313 | -0.100789246 | 0.045 | 0.065 | 1 | 1.4 |
| CHCHD2     | 0.000315 | -0.208266254 | 0.212 | 0.241 | 1 | 1.4 |
| TPRKB      | 0.000341 | -0.178692878 | 0.193 | 0.221 | 1 | 1.4 |
| ALDH1A3    | 0.000341 | -0.215205183 | 0.533 | 0.544 | 1 | 1.4 |
| RPL9       | 0.000352 | -0.15425259  | 0.681 | 0.668 | 1 | 1.4 |
| GADD45B    | 0.00037  | -0.173342823 | 0.04  | 0.059 | 1 | 1.4 |
| STK39      | 0.000376 | 0.171393225  | 0.151 | 0.123 | 1 | 1.4 |
| VPS37B     | 0.000381 | -0.119357667 | 0.134 | 0.162 | 1 | 1.4 |
| PTMA       | 0.000381 | 0.174144544  | 0.627 | 0.573 | 1 | 1.4 |
| ATXN2L     | 0.000394 | -0.104531406 | 0.061 | 0.083 | 1 | 1.4 |
| S100A2     | 0.000397 | -0.551945227 | 0.084 | 0.107 | 1 | 1.4 |
| ORMDL2     | 0.000399 | -0.171192465 | 0.144 | 0.17  | 1 | 1.4 |
| KCNK1      | 0.000399 | -0.178955628 | 0.152 | 0.18  | 1 | 1.4 |
| EIF5B      | 0.000421 | -0.18953037  | 0.202 | 0.229 | 1 | 1.4 |
| IQCG       | 0.000426 | -0.245837174 | 0.201 | 0.225 | 1 | 1.4 |
| APP        | 0.000428 | -0.117050291 | 0.787 | 0.764 | 1 | 1.4 |
| FRMD6      | 0.000428 | -0.251413373 | 0.178 | 0.202 | 1 | 1.4 |
| GTF2F2     | 0.000429 | -0.142519684 | 0.125 | 0.152 | 1 | 1.4 |
| FRAS1      | 0.00043  | -0.104993593 | 0.049 | 0.07  | 1 | 1.4 |
| LAMC1      | 0.000449 | -0.254545388 | 0.249 | 0.272 | 1 | 1.4 |
| ARPC2      | 0.000456 | -0.17234426  | 0.157 | 0.183 | 1 | 1.4 |
| PKIG       | 0.000474 | -0.117469976 | 0.044 | 0.063 | 1 | 1.4 |

|           |          |              |       |       |   |     |
|-----------|----------|--------------|-------|-------|---|-----|
| TMEM41B   | 0.000489 | -0.168532044 | 0.177 | 0.204 | 1 | 1.4 |
| ABTB2     | 0.00049  | -0.212159061 | 0.22  | 0.248 | 1 | 1.4 |
| PTCHD1-AS | 0.000502 | -0.164566571 | 0.088 | 0.112 | 1 | 1.4 |
| MPRIP-AS1 | 0.000517 | -0.105457142 | 0.042 | 0.061 | 1 | 1.4 |
| DDX18     | 0.000538 | -0.211501101 | 0.356 | 0.372 | 1 | 1.4 |
| HNRNPM    | 0.000538 | -0.177641567 | 0.175 | 0.2   | 1 | 1.4 |
| RHEB      | 0.000538 | -0.186593919 | 0.233 | 0.257 | 1 | 1.4 |
| GNAI3     | 0.000546 | -0.148313822 | 0.14  | 0.166 | 1 | 1.4 |
| GPC5      | 0.000566 | -0.139155995 | 0.028 | 0.044 | 1 | 1.4 |
| TMEM258   | 0.000591 | -0.129214902 | 0.627 | 0.632 | 1 | 1.4 |
| RPSA      | 0.000619 | -0.134431444 | 0.928 | 0.918 | 1 | 1.4 |
| DOCK5     | 0.00063  | -0.205809516 | 0.199 | 0.226 | 1 | 1.4 |
| RAB1A     | 0.000658 | -0.216776519 | 0.456 | 0.454 | 1 | 1.4 |
| TRA2B     | 0.000663 | -0.202181014 | 0.179 | 0.205 | 1 | 1.4 |
| YBX1      | 0.000671 | -0.157017404 | 0.323 | 0.347 | 1 | 1.4 |
| SDK2      | 0.000676 | -0.216261946 | 0.055 | 0.074 | 1 | 1.4 |
| RP11-231C | 0.000679 | -0.173160564 | 0.175 | 0.2   | 1 | 1.4 |
| BLVRA     | 0.000718 | -0.11087841  | 0.074 | 0.095 | 1 | 1.4 |
| NUDCD1    | 0.00076  | -0.14169757  | 0.102 | 0.126 | 1 | 1.4 |
| MBIP      | 0.000765 | -0.158046347 | 0.144 | 0.169 | 1 | 1.4 |
| RHOB      | 0.000799 | -0.104454088 | 0.038 | 0.055 | 1 | 1.4 |
| MRPL42    | 0.000811 | -0.145551017 | 0.165 | 0.191 | 1 | 1.4 |
| FAM126B   | 0.000822 | -0.207380048 | 0.141 | 0.165 | 1 | 1.4 |
| PPP2R2D   | 0.000824 | -0.150337832 | 0.108 | 0.132 | 1 | 1.4 |
| EPCAM     | 0.000886 | -0.160527542 | 0.176 | 0.201 | 1 | 1.4 |
| ITGA3     | 0.000902 | -0.151496629 | 0.1   | 0.124 | 1 | 1.4 |
| SERINC5   | 0.000948 | -0.191397344 | 0.221 | 0.247 | 1 | 1.4 |
| NFE2L3    | 0.000957 | -0.215351442 | 0.077 | 0.098 | 1 | 1.4 |
| ATP6VOE1  | 0.000982 | -0.161778624 | 0.691 | 0.659 | 1 | 1.4 |
| SPTAN1    | 0.000987 | -0.166656747 | 0.163 | 0.189 | 1 | 1.4 |
| PLCB1     | 0.00102  | -0.282597438 | 0.388 | 0.402 | 1 | 1.4 |
| UBR4      | 0.001034 | -0.149134405 | 0.172 | 0.198 | 1 | 1.4 |
| RPL10     | 0.001044 | -0.137208987 | 0.954 | 0.968 | 1 | 1.4 |
| RPS15     | 0.001057 | 0.182552985  | 0.192 | 0.163 | 1 | 1.4 |
| CD63      | 0.00108  | -0.220682431 | 0.198 | 0.221 | 1 | 1.4 |
| RGCC      | 0.001089 | -0.104505793 | 0.041 | 0.058 | 1 | 1.4 |
| SLIT2     | 0.001133 | -0.13352274  | 0.033 | 0.048 | 1 | 1.4 |
| EIF3M     | 0.001135 | -0.184059032 | 0.492 | 0.486 | 1 | 1.4 |
| AIM1      | 0.001171 | -0.25382156  | 0.304 | 0.318 | 1 | 1.4 |
| NKX3-1    | 0.001171 | -0.183472277 | 0.074 | 0.094 | 1 | 1.4 |
| SERPINB9  | 0.001176 | -0.439974474 | 0.139 | 0.165 | 1 | 1.4 |
| BLZF1     | 0.001208 | -0.129831649 | 0.077 | 0.097 | 1 | 1.4 |
| AK6       | 0.001251 | -0.178684167 | 0.188 | 0.212 | 1 | 1.4 |
| TNFRSF8   | 0.001277 | -0.146208101 | 0.116 | 0.14  | 1 | 1.4 |
| CXCL10    | 0.001341 | 0.148292021  | 0.013 | 0.006 | 1 | 1.4 |
| ATP5B     | 0.001415 | -0.171239882 | 0.213 | 0.236 | 1 | 1.4 |
| HCAR2     | 0.00142  | -0.18898052  | 0.232 | 0.191 | 1 | 1.4 |

|           |          |              |       |       |   |     |
|-----------|----------|--------------|-------|-------|---|-----|
| NUS1      | 0.001433 | -0.143298665 | 0.102 | 0.124 | 1 | 1.4 |
| FAM46A    | 0.001489 | -0.148714576 | 0.094 | 0.116 | 1 | 1.4 |
| VCP       | 0.00152  | -0.14094912  | 0.095 | 0.116 | 1 | 1.4 |
| TMEM263   | 0.001543 | -0.112100254 | 0.09  | 0.112 | 1 | 1.4 |
| RPL29     | 0.001545 | 0.159824756  | 0.328 | 0.289 | 1 | 1.4 |
| PAICS     | 0.001589 | -0.118784506 | 0.193 | 0.218 | 1 | 1.4 |
| COG5      | 0.001629 | -0.238802754 | 0.463 | 0.458 | 1 | 1.4 |
| BAIAP2L1  | 0.001639 | -0.104819914 | 0.96  | 0.969 | 1 | 1.4 |
| FNBP1     | 0.001648 | -0.124532878 | 0.552 | 0.464 | 1 | 1.4 |
| ARL4A     | 0.001676 | -0.18005439  | 0.116 | 0.139 | 1 | 1.4 |
| CDV3      | 0.001709 | -0.11751194  | 0.091 | 0.112 | 1 | 1.4 |
| NDUFA1    | 0.00173  | -0.147239011 | 0.563 | 0.56  | 1 | 1.4 |
| ATP2A2    | 0.001745 | -0.17475149  | 0.234 | 0.256 | 1 | 1.4 |
| KDM5C     | 0.001753 | -0.101840731 | 0.07  | 0.09  | 1 | 1.4 |
| MRPL22    | 0.001756 | -0.179536529 | 0.245 | 0.264 | 1 | 1.4 |
| WASF2     | 0.001767 | -0.132619329 | 0.196 | 0.222 | 1 | 1.4 |
| ARHGAP10  | 0.001818 | -0.179118063 | 0.119 | 0.141 | 1 | 1.4 |
| SEMA3E    | 0.00184  | -0.103835999 | 0.058 | 0.077 | 1 | 1.4 |
| USP31     | 0.001958 | -0.138490439 | 0.113 | 0.136 | 1 | 1.4 |
| LRP6      | 0.001981 | -0.251365642 | 0.28  | 0.295 | 1 | 1.4 |
| PRDX1     | 0.001996 | -0.206680077 | 0.734 | 0.713 | 1 | 1.4 |
| EIF4H     | 0.00205  | -0.117388144 | 0.077 | 0.096 | 1 | 1.4 |
| DYNLT3    | 0.002077 | -0.1656503   | 0.202 | 0.223 | 1 | 1.4 |
| PPP4R1    | 0.0021   | -0.137097077 | 0.187 | 0.21  | 1 | 1.4 |
| VAT1      | 0.002113 | -0.119430062 | 0.104 | 0.127 | 1 | 1.4 |
| DPM1      | 0.002113 | -0.18125746  | 0.258 | 0.278 | 1 | 1.4 |
| NEK10     | 0.002146 | -0.138421813 | 0.104 | 0.126 | 1 | 1.4 |
| DSTN      | 0.002192 | -0.188024342 | 0.486 | 0.485 | 1 | 1.4 |
| ZNF292    | 0.0023   | -0.180084264 | 0.656 | 0.628 | 1 | 1.4 |
| LDHB      | 0.002335 | -0.166063205 | 0.78  | 0.739 | 1 | 1.4 |
| PPP1R13L  | 0.002341 | -0.135999061 | 0.089 | 0.11  | 1 | 1.4 |
| MBNL2     | 0.002342 | -0.161674484 | 0.396 | 0.411 | 1 | 1.4 |
| FBXO42    | 0.002368 | -0.181604916 | 0.157 | 0.179 | 1 | 1.4 |
| ZSWIM6    | 0.002368 | -0.216749514 | 0.336 | 0.35  | 1 | 1.4 |
| HSBP1     | 0.00238  | -0.172396085 | 0.489 | 0.481 | 1 | 1.4 |
| DSC2      | 0.002383 | -0.203497165 | 0.225 | 0.245 | 1 | 1.4 |
| TNFRSF10E | 0.002438 | -0.173737627 | 0.18  | 0.203 | 1 | 1.4 |
| S100A13   | 0.002489 | -0.156584868 | 0.621 | 0.599 | 1 | 1.4 |
| DNAJB1    | 0.002536 | -0.188584288 | 0.09  | 0.109 | 1 | 1.4 |
| MPP5      | 0.002548 | -0.17692552  | 0.226 | 0.248 | 1 | 1.4 |
| CSDE1     | 0.002629 | -0.137010845 | 0.592 | 0.581 | 1 | 1.4 |
| DNAJB9    | 0.002642 | -0.104215028 | 0.049 | 0.066 | 1 | 1.4 |
| ASAP1     | 0.002783 | -0.214181615 | 0.228 | 0.248 | 1 | 1.4 |
| PSMB6     | 0.002822 | -0.107754074 | 0.09  | 0.11  | 1 | 1.4 |
| LINC01420 | 0.003    | -0.142358796 | 0.409 | 0.355 | 1 | 1.4 |
| SLC38A2   | 0.003063 | -0.104163208 | 0.158 | 0.182 | 1 | 1.4 |
| ATP5J     | 0.003144 | -0.171941817 | 0.5   | 0.495 | 1 | 1.4 |

|           |          |              |       |       |   |     |
|-----------|----------|--------------|-------|-------|---|-----|
| FNBP1L    | 0.003241 | -0.260921793 | 0.435 | 0.434 | 1 | 1.4 |
| SPTLC2    | 0.003332 | -0.193557254 | 0.149 | 0.169 | 1 | 1.4 |
| BCL2A1    | 0.00336  | -0.216438648 | 0.142 | 0.164 | 1 | 1.4 |
| VDAC2     | 0.003502 | -0.119160207 | 0.108 | 0.129 | 1 | 1.4 |
| SRFBP1    | 0.003601 | -0.172020975 | 0.181 | 0.202 | 1 | 1.4 |
| UFC1      | 0.003625 | -0.154806406 | 0.514 | 0.509 | 1 | 1.4 |
| FBXO3     | 0.003658 | -0.120661476 | 0.085 | 0.104 | 1 | 1.4 |
| B3GNT5    | 0.00372  | -0.121719089 | 0.088 | 0.108 | 1 | 1.4 |
| TATDN1    | 0.003851 | -0.187655779 | 0.301 | 0.311 | 1 | 1.4 |
| PHACTR4   | 0.003908 | -0.185493092 | 0.39  | 0.398 | 1 | 1.4 |
| PPARG     | 0.00394  | -0.106991312 | 0.049 | 0.065 | 1 | 1.4 |
| NOP58     | 0.003997 | -0.142947486 | 0.203 | 0.222 | 1 | 1.4 |
| S100A4    | 0.004029 | -0.125731451 | 0.083 | 0.102 | 1 | 1.4 |
| GAB2      | 0.004214 | -0.174551839 | 0.206 | 0.226 | 1 | 1.4 |
| MED13     | 0.004316 | -0.199930177 | 0.343 | 0.352 | 1 | 1.4 |
| RNF11     | 0.004434 | -0.107884797 | 0.14  | 0.163 | 1 | 1.4 |
| PIWIL1    | 0.00467  | -0.129832763 | 0.047 | 0.062 | 1 | 1.4 |
| NPTN      | 0.004867 | -0.123150415 | 0.105 | 0.124 | 1 | 1.4 |
| CAPZB     | 0.005348 | -0.118811339 | 0.126 | 0.147 | 1 | 1.4 |
| CMTM7     | 0.005379 | -0.182419247 | 0.216 | 0.235 | 1 | 1.4 |
| HDAC2     | 0.005464 | -0.138318717 | 0.194 | 0.215 | 1 | 1.4 |
| MCFD2     | 0.00557  | -0.114158362 | 0.14  | 0.162 | 1 | 1.4 |
| RP11-795H | 0.005632 | -0.182614196 | 0.434 | 0.443 | 1 | 1.4 |
| WBP4      | 0.005694 | -0.141242147 | 0.11  | 0.129 | 1 | 1.4 |
| DCTN6     | 0.005911 | -0.168695684 | 0.336 | 0.348 | 1 | 1.4 |
| RPS25     | 0.005919 | -0.101172738 | 0.872 | 0.864 | 1 | 1.4 |
| EIF3K     | 0.006001 | -0.220430995 | 0.484 | 0.47  | 1 | 1.4 |
| VPS35     | 0.006002 | -0.172467582 | 0.274 | 0.288 | 1 | 1.4 |
| RPS9      | 0.006428 | 0.164577838  | 0.324 | 0.29  | 1 | 1.4 |
| ATP11B    | 0.006447 | -0.168807442 | 0.182 | 0.201 | 1 | 1.4 |
| YEATS2    | 0.006619 | -0.123019568 | 0.129 | 0.149 | 1 | 1.4 |
| TSHZ2     | 0.006675 | -0.242028332 | 0.461 | 0.467 | 1 | 1.4 |
| UGP2      | 0.006702 | -0.146371053 | 0.532 | 0.522 | 1 | 1.4 |
| FAM219A   | 0.0069   | -0.109950675 | 0.071 | 0.087 | 1 | 1.4 |
| MLF1      | 0.007022 | -0.160316647 | 0.214 | 0.234 | 1 | 1.4 |
| INSIG1    | 0.007037 | -0.1095721   | 0.094 | 0.112 | 1 | 1.4 |
| RBM8A     | 0.007042 | -0.182020348 | 0.52  | 0.508 | 1 | 1.4 |
| PDLIM1    | 0.007073 | -0.10327612  | 0.074 | 0.092 | 1 | 1.4 |
| CHD6      | 0.007353 | -0.198077068 | 0.285 | 0.299 | 1 | 1.4 |
| CLIP2     | 0.007478 | -0.115009987 | 0.171 | 0.193 | 1 | 1.4 |
| FAM3C     | 0.00761  | -0.132728702 | 0.143 | 0.162 | 1 | 1.4 |
| EIF5      | 0.007818 | -0.178595819 | 0.189 | 0.207 | 1 | 1.4 |
| MYO3B     | 0.008043 | -0.17377893  | 0.191 | 0.212 | 1 | 1.4 |
| SH3D19    | 0.008112 | -0.165409204 | 0.337 | 0.347 | 1 | 1.4 |
| ATG14     | 0.008116 | -0.120959624 | 0.087 | 0.104 | 1 | 1.4 |
| RPL8      | 0.008381 | 0.1376344    | 0.206 | 0.181 | 1 | 1.4 |
| IAH1      | 0.008436 | -0.12859213  | 0.123 | 0.142 | 1 | 1.4 |

|           |          |              |       |       |   |     |
|-----------|----------|--------------|-------|-------|---|-----|
| EIF3J     | 0.008834 | -0.154554037 | 0.138 | 0.156 | 1 | 1.4 |
| TM9SF3    | 0.008839 | -0.173604115 | 0.272 | 0.284 | 1 | 1.4 |
| FUNDC2    | 0.008909 | -0.154598931 | 0.133 | 0.149 | 1 | 1.4 |
| ACAT2     | 0.009015 | -0.181284887 | 0.28  | 0.295 | 1 | 1.4 |
| RAB5A     | 0.009239 | -0.144085951 | 0.208 | 0.226 | 1 | 1.4 |
| RNF149    | 0.009345 | -0.200922388 | 0.291 | 0.3   | 1 | 1.4 |
| SLU7      | 0.00937  | -0.128579784 | 0.126 | 0.144 | 1 | 1.4 |
| PIGR      | 0.009384 | -0.195163623 | 0.516 | 0.52  | 1 | 1.4 |
| AGFG1     | 0.009394 | -0.221408464 | 0.412 | 0.408 | 1 | 1.4 |
| RSBN1L    | 0.009471 | -0.168840835 | 0.11  | 0.127 | 1 | 1.4 |
| HSPA1A    | 0.009522 | -0.198323756 | 0.041 | 0.054 | 1 | 1.4 |
| NCKAP1    | 0.009572 | -0.184594597 | 0.405 | 0.411 | 1 | 1.4 |
| PTGES3    | 0.009637 | -0.136656985 | 0.198 | 0.217 | 1 | 1.4 |
| NDUFV2    | 0.009712 | -0.128978699 | 0.14  | 0.159 | 1 | 1.4 |
| NDUFS4    | 0.009946 | -0.164581987 | 0.474 | 0.458 | 1 | 1.4 |
| CDC5L     | 0.009971 | -0.138597523 | 0.238 | 0.256 | 1 | 1.4 |
| SRSF11    | 0.010003 | -0.132348223 | 0.486 | 0.477 | 1 | 1.4 |
| HMGCS1    | 0.010009 | -0.148898508 | 0.221 | 0.24  | 1 | 1.4 |
| SPOPL     | 0.010082 | -0.117414556 | 0.136 | 0.155 | 1 | 1.4 |
| 7-Mar     | 0.010135 | -0.164428809 | 0.272 | 0.285 | 1 | 1.4 |
| ARL8B     | 0.010294 | -0.202669963 | 0.244 | 0.256 | 1 | 1.4 |
| TOP2B     | 0.010364 | -0.131192887 | 0.164 | 0.183 | 1 | 1.4 |
| ZCCHC2    | 0.010567 | -0.209556025 | 0.301 | 0.312 | 1 | 1.4 |
| ANKRD11   | 0.010941 | -0.168018107 | 0.282 | 0.296 | 1 | 1.4 |
| FYTTD1    | 0.011009 | -0.114219481 | 0.103 | 0.119 | 1 | 1.4 |
| FAM129B   | 0.011463 | -0.133170052 | 0.097 | 0.114 | 1 | 1.4 |
| FOSB      | 0.011558 | -0.201086377 | 0.423 | 0.427 | 1 | 1.4 |
| ARG2      | 0.011636 | -0.143553508 | 0.14  | 0.159 | 1 | 1.4 |
| SON       | 0.011719 | -0.192890706 | 0.708 | 0.683 | 1 | 1.4 |
| GSTA1     | 0.012298 | -0.318617601 | 0.078 | 0.093 | 1 | 1.4 |
| EGLN3     | 0.012338 | -0.192539134 | 0.103 | 0.12  | 1 | 1.4 |
| BBC3      | 0.012582 | -0.103483521 | 0.058 | 0.072 | 1 | 1.4 |
| HLA-DRB1  | 0.012888 | -0.113365988 | 0.054 | 0.068 | 1 | 1.4 |
| PKM       | 0.013282 | -0.175425229 | 0.242 | 0.259 | 1 | 1.4 |
| GRAMD3    | 0.013479 | -0.192238271 | 0.368 | 0.375 | 1 | 1.4 |
| MAPKBP1   | 0.013853 | -0.12052095  | 0.085 | 0.101 | 1 | 1.4 |
| PEG10     | 0.014052 | -0.102042237 | 0.054 | 0.068 | 1 | 1.4 |
| KPNA6     | 0.014498 | -0.168904305 | 0.268 | 0.281 | 1 | 1.4 |
| CLIP4     | 0.01468  | -0.163059274 | 0.223 | 0.239 | 1 | 1.4 |
| GABARAPL  | 0.014808 | -0.117448849 | 0.142 | 0.159 | 1 | 1.4 |
| RP11-659O | 0.015161 | -0.152833996 | 0.176 | 0.192 | 1 | 1.4 |
| SLC16A13  | 0.015256 | -0.203514791 | 0.044 | 0.056 | 1 | 1.4 |
| LINC01492 | 0.01538  | -0.114109289 | 0.121 | 0.136 | 1 | 1.4 |
| MPDZ      | 0.015567 | -0.154472492 | 0.168 | 0.184 | 1 | 1.4 |
| ERGIC1    | 0.015767 | -0.108372378 | 0.085 | 0.101 | 1 | 1.4 |
| RGS2      | 0.015937 | -0.136766736 | 0.233 | 0.204 | 1 | 1.4 |
| RP11-496N | 0.016216 | -0.113128909 | 0.011 | 0.019 | 1 | 1.4 |

|           |          |              |       |       |   |     |
|-----------|----------|--------------|-------|-------|---|-----|
| LMNA      | 0.016234 | -0.166916487 | 0.193 | 0.21  | 1 | 1.4 |
| RP11-7790 | 0.016239 | -0.203729569 | 0.205 | 0.218 | 1 | 1.4 |
| C6orf132  | 0.01648  | -0.106252096 | 0.151 | 0.17  | 1 | 1.4 |
| CHD1      | 0.016526 | -0.169699695 | 0.221 | 0.236 | 1 | 1.4 |
| TAX1BP1   | 0.016593 | -0.10898032  | 0.693 | 0.661 | 1 | 1.4 |
| KIAA0922  | 0.016689 | -0.414951075 | 0.258 | 0.263 | 1 | 1.4 |
| RAB11A    | 0.017308 | -0.18362158  | 0.613 | 0.596 | 1 | 1.4 |
| MTURN     | 0.017511 | -0.101400043 | 0.094 | 0.11  | 1 | 1.4 |
| TOMM20    | 0.017541 | -0.144793185 | 0.24  | 0.253 | 1 | 1.4 |
| HLA-DRA   | 0.017745 | -0.219843732 | 0.144 | 0.161 | 1 | 1.4 |
| IRS2      | 0.018292 | -0.149600083 | 0.354 | 0.364 | 1 | 1.4 |
| DSP       | 0.018482 | -0.169038337 | 0.34  | 0.344 | 1 | 1.4 |
| YPEL5     | 0.018576 | -0.161917019 | 0.38  | 0.383 | 1 | 1.4 |
| KIF13A    | 0.018977 | -0.22805182  | 0.263 | 0.274 | 1 | 1.4 |
| PPFIBP1   | 0.019039 | -0.127579059 | 0.159 | 0.176 | 1 | 1.4 |
| UBQLN1    | 0.01934  | -0.153654765 | 0.239 | 0.252 | 1 | 1.4 |
| GCLM      | 0.019837 | -0.174437738 | 0.145 | 0.16  | 1 | 1.4 |
| SRSF10    | 0.019882 | -0.112199241 | 0.132 | 0.149 | 1 | 1.4 |
| SCYL2     | 0.020785 | -0.163002754 | 0.247 | 0.259 | 1 | 1.4 |
| RAB3IP    | 0.021492 | -0.133075364 | 0.108 | 0.123 | 1 | 1.4 |
| LGALS3    | 0.021549 | -0.245446836 | 0.172 | 0.185 | 1 | 1.4 |
| DYRK1A    | 0.021745 | -0.198057223 | 0.359 | 0.359 | 1 | 1.4 |
| CKS1B     | 0.021782 | -0.166421706 | 0.393 | 0.39  | 1 | 1.4 |
| STK40     | 0.0221   | -0.135637277 | 0.118 | 0.134 | 1 | 1.4 |
| BFAR      | 0.022312 | -0.123764706 | 0.186 | 0.2   | 1 | 1.4 |
| COPB2     | 0.022351 | -0.140324463 | 0.198 | 0.213 | 1 | 1.4 |
| CNIH4     | 0.022957 | -0.136459718 | 0.378 | 0.383 | 1 | 1.4 |
| MARK3     | 0.024081 | -0.153542776 | 0.437 | 0.431 | 1 | 1.4 |
| RUVBL1    | 0.024322 | -0.111511301 | 0.117 | 0.132 | 1 | 1.4 |
| LARS      | 0.02541  | -0.139742639 | 0.235 | 0.245 | 1 | 1.4 |
| MAP3K9    | 0.025626 | -0.136548862 | 0.161 | 0.177 | 1 | 1.4 |
| AC090498. | 0.025715 | -0.148566339 | 0.388 | 0.39  | 1 | 1.4 |
| CLIC4     | 0.026481 | -0.133780888 | 0.668 | 0.651 | 1 | 1.4 |
| EIF4G2    | 0.027329 | -0.15104     | 0.322 | 0.329 | 1 | 1.4 |
| BTG3      | 0.02741  | -0.12221851  | 0.184 | 0.198 | 1 | 1.4 |
| NTN4      | 0.027551 | -0.19815721  | 0.168 | 0.182 | 1 | 1.4 |
| ADAM32    | 0.028129 | -0.17701695  | 0.114 | 0.128 | 1 | 1.4 |
| GAREM1    | 0.029615 | -0.139723399 | 0.258 | 0.269 | 1 | 1.4 |
| CHMP4B    | 0.030791 | -0.137769801 | 0.114 | 0.127 | 1 | 1.4 |
| PID1      | 0.030893 | -0.148455267 | 0.127 | 0.142 | 1 | 1.4 |
| YY1       | 0.030964 | -0.122983523 | 0.159 | 0.175 | 1 | 1.4 |
| SSBP2     | 0.03123  | -0.333163587 | 0.348 | 0.344 | 1 | 1.4 |
| MAP3K8    | 0.031647 | -0.172565123 | 0.272 | 0.283 | 1 | 1.4 |
| ATF4      | 0.031894 | -0.154262782 | 0.36  | 0.362 | 1 | 1.4 |
| OSTC      | 0.032384 | -0.155042377 | 0.516 | 0.501 | 1 | 1.4 |
| ARCN1     | 0.032523 | -0.118543672 | 0.093 | 0.106 | 1 | 1.4 |
| CCNK      | 0.032814 | -0.114956835 | 0.113 | 0.127 | 1 | 1.4 |



|           |          |              |       |       |   |     |
|-----------|----------|--------------|-------|-------|---|-----|
| WDR45B    | 0.033116 | -0.158487832 | 0.281 | 0.289 | 1 | 1.4 |
| SNRPG     | 0.033877 | -0.150463696 | 0.564 | 0.538 | 1 | 1.4 |
| ETF1      | 0.034532 | -0.122872715 | 0.136 | 0.151 | 1 | 1.4 |
| NACA2     | 0.034715 | -0.125007907 | 0.647 | 0.633 | 1 | 1.4 |
| CANX      | 0.036038 | -0.121025072 | 0.33  | 0.339 | 1 | 1.4 |
| TM9SF2    | 0.036078 | -0.157609086 | 0.18  | 0.192 | 1 | 1.4 |
| PHF3      | 0.036147 | -0.145829037 | 0.342 | 0.345 | 1 | 1.4 |
| IFIT2     | 0.036631 | -0.18034343  | 0.033 | 0.042 | 1 | 1.4 |
| VPS26A    | 0.037112 | -0.116755274 | 0.155 | 0.169 | 1 | 1.4 |
| CMIP      | 0.037362 | -0.185393575 | 0.36  | 0.36  | 1 | 1.4 |
| ACSS2     | 0.037492 | -0.122550212 | 0.168 | 0.182 | 1 | 1.4 |
| DNTTIP2   | 0.037795 | -0.160656724 | 0.208 | 0.219 | 1 | 1.4 |
| ZC3H11A   | 0.03877  | -0.136273495 | 0.232 | 0.244 | 1 | 1.4 |
| REEP3     | 0.039093 | -0.167130758 | 0.238 | 0.248 | 1 | 1.4 |
| HNRNPU    | 0.04064  | -0.113285489 | 0.093 | 0.106 | 1 | 1.4 |
| RP11-273G | 0.040707 | -0.111472898 | 0.065 | 0.077 | 1 | 1.4 |
| TXLNG     | 0.04124  | -0.102408561 | 0.101 | 0.115 | 1 | 1.4 |
| GLS       | 0.042417 | -0.203950998 | 0.253 | 0.26  | 1 | 1.4 |
| NAA15     | 0.042664 | -0.128307758 | 0.136 | 0.149 | 1 | 1.4 |
| ATP5EP2   | 0.042952 | -0.155788476 | 0.197 | 0.209 | 1 | 1.4 |
| SPEN      | 0.043356 | -0.180723574 | 0.266 | 0.274 | 1 | 1.4 |
| NSA2      | 0.043846 | -0.149590911 | 0.427 | 0.416 | 1 | 1.4 |
| FOXJ3     | 0.043884 | -0.17238604  | 0.292 | 0.295 | 1 | 1.4 |
| NCL       | 0.044127 | -0.172186729 | 0.197 | 0.209 | 1 | 1.4 |
| C2orf88   | 0.045281 | -0.19176764  | 0.394 | 0.384 | 1 | 1.4 |
| GSPT1     | 0.045797 | -0.128993504 | 0.207 | 0.219 | 1 | 1.4 |
| CYP24A1   | 0.046983 | -0.295590085 | 0.221 | 0.232 | 1 | 1.4 |
| PSMD11    | 0.050921 | -0.131751452 | 0.295 | 0.304 | 1 | 1.4 |
| CTC-425F1 | 0.052391 | -0.108006092 | 0.074 | 0.085 | 1 | 1.4 |
| VBP1      | 0.052954 | -0.10152774  | 0.142 | 0.155 | 1 | 1.4 |
| PVRL2     | 0.053242 | -0.134390277 | 0.167 | 0.18  | 1 | 1.4 |
| NR3C1     | 0.054184 | -0.106462906 | 0.24  | 0.252 | 1 | 1.4 |
| DUSP1     | 0.056112 | -0.140886109 | 0.18  | 0.192 | 1 | 1.4 |
| RGS6      | 0.056751 | -0.1289029   | 0.135 | 0.149 | 1 | 1.4 |
| TCEANC2   | 0.057508 | -0.14669676  | 0.206 | 0.216 | 1 | 1.4 |
| ATAD1     | 0.05757  | -0.142132634 | 0.15  | 0.161 | 1 | 1.4 |
| PSMC1     | 0.057684 | -0.170851373 | 0.365 | 0.362 | 1 | 1.4 |
| HBS1L     | 0.059509 | -0.130809921 | 0.189 | 0.198 | 1 | 1.4 |
| CD59      | 0.061328 | -0.218468189 | 0.952 | 0.834 | 1 | 1.4 |
| ARHGAP21  | 0.061597 | -0.15437609  | 0.236 | 0.244 | 1 | 1.4 |
| MAP7      | 0.061729 | -0.157840565 | 0.331 | 0.332 | 1 | 1.4 |
| MCF2L2    | 0.061861 | -0.102295812 | 0.15  | 0.164 | 1 | 1.4 |
| VEZT      | 0.063318 | -0.129891437 | 0.337 | 0.34  | 1 | 1.4 |
| WDR48     | 0.064704 | -0.15454176  | 0.179 | 0.189 | 1 | 1.4 |
| MAGOH     | 0.065043 | -0.126090856 | 0.18  | 0.192 | 1 | 1.4 |
| HSD17B6   | 0.065056 | -0.154644588 | 0.029 | 0.037 | 1 | 1.4 |
| 6-Mar     | 0.067706 | -0.153880639 | 0.345 | 0.343 | 1 | 1.4 |

|          |          |              |       |       |   |     |
|----------|----------|--------------|-------|-------|---|-----|
| GAPVD1   | 0.068337 | -0.118438215 | 0.201 | 0.212 | 1 | 1.4 |
| CTNNAL1  | 0.069481 | -0.126752703 | 0.099 | 0.11  | 1 | 1.4 |
| AKAP13   | 0.071807 | -0.201889588 | 0.54  | 0.512 | 1 | 1.4 |
| MED15    | 0.071813 | -0.112833775 | 0.133 | 0.144 | 1 | 1.4 |
| GABARAP  | 0.072384 | -0.204179132 | 0.305 | 0.304 | 1 | 1.4 |
| COCH     | 0.073096 | -0.102224434 | 0.096 | 0.106 | 1 | 1.4 |
| PSMD7    | 0.073432 | -0.101698094 | 0.141 | 0.152 | 1 | 1.4 |
| ZFP36L2  | 0.074135 | -0.182892781 | 0.394 | 0.352 | 1 | 1.4 |
| URB1     | 0.074607 | -0.108231703 | 0.067 | 0.056 | 1 | 1.4 |
| SNRPF    | 0.076259 | -0.14196084  | 0.243 | 0.251 | 1 | 1.4 |
| CHORDC1  | 0.076921 | -0.100282363 | 0.089 | 0.1   | 1 | 1.4 |
| STRAP    | 0.077323 | -0.101114053 | 0.117 | 0.128 | 1 | 1.4 |
| CCNG2    | 0.081142 | -0.151024611 | 0.145 | 0.155 | 1 | 1.4 |
| FASTKD2  | 0.081426 | -0.108735622 | 0.095 | 0.106 | 1 | 1.4 |
| SESTD1   | 0.082991 | -0.108742161 | 0.654 | 0.613 | 1 | 1.4 |
| HNRNPH1  | 0.084638 | -0.136025866 | 0.418 | 0.414 | 1 | 1.4 |
| BIRC3    | 0.084689 | -0.226348343 | 0.862 | 0.812 | 1 | 1.4 |
| GFPT1    | 0.085587 | -0.153700457 | 0.203 | 0.21  | 1 | 1.4 |
| ANKRD28  | 0.088165 | -0.169397848 | 0.303 | 0.305 | 1 | 1.4 |
| ATP1B3   | 0.088658 | -0.144779745 | 0.264 | 0.27  | 1 | 1.4 |
| AFAP1    | 0.090427 | -0.102691157 | 0.118 | 0.13  | 1 | 1.4 |
| CCT4     | 0.091049 | -0.118824689 | 0.213 | 0.221 | 1 | 1.4 |
| HBP1     | 0.09473  | -0.117929203 | 0.221 | 0.229 | 1 | 1.4 |
| SSBP1    | 0.096629 | -0.137256601 | 0.45  | 0.439 | 1 | 1.4 |
| MGAT5    | 0.101287 | -0.169826675 | 0.31  | 0.31  | 1 | 1.4 |
| UHRF1BP1 | 0.10359  | -0.112842441 | 0.188 | 0.196 | 1 | 1.4 |
| ARL1     | 0.107594 | -0.126088819 | 0.283 | 0.287 | 1 | 1.4 |
| ARHGEF7  | 0.109781 | -0.117318171 | 0.165 | 0.175 | 1 | 1.4 |
| TBC1D8   | 0.113867 | -0.166431368 | 0.412 | 0.403 | 1 | 1.4 |
| EEF1B2   | 0.114092 | -0.134118362 | 0.902 | 0.877 | 1 | 1.4 |
| ZNF83    | 0.114887 | -0.203792591 | 0.365 | 0.357 | 1 | 1.4 |
| WDR26    | 0.118761 | -0.116586564 | 0.204 | 0.212 | 1 | 1.4 |
| DYNC112  | 0.118773 | -0.110222675 | 0.382 | 0.374 | 1 | 1.4 |
| AC026202 | 0.123538 | -0.19581953  | 0.193 | 0.197 | 1 | 1.4 |
| LRRC23   | 0.128967 | -0.171193389 | 0.093 | 0.103 | 1 | 1.4 |
| SRP72    | 0.132663 | -0.101882491 | 0.178 | 0.187 | 1 | 1.4 |
| MTRNR2L8 | 0.133284 | -0.119688966 | 0.196 | 0.203 | 1 | 1.4 |
| SLC19A2  | 0.13555  | -0.112041441 | 0.084 | 0.092 | 1 | 1.4 |
| PPHLN1   | 0.140302 | -0.138541211 | 0.408 | 0.397 | 1 | 1.4 |
| CLIP1    | 0.143004 | -0.147620258 | 0.39  | 0.382 | 1 | 1.4 |
| FOXK2    | 0.144921 | -0.1475386   | 0.303 | 0.301 | 1 | 1.4 |
| NOCT     | 0.144996 | -0.155593255 | 0.133 | 0.14  | 1 | 1.4 |
| PTK2     | 0.148193 | -0.108613102 | 0.586 | 0.557 | 1 | 1.4 |
| ZNF462   | 0.152723 | -0.140150562 | 0.354 | 0.347 | 1 | 1.4 |
| FAM53C   | 0.154969 | -0.120621816 | 0.206 | 0.213 | 1 | 1.4 |
| RBM39    | 0.157141 | -0.130398242 | 0.468 | 0.457 | 1 | 1.4 |
| RTCB     | 0.158776 | -0.157143194 | 0.467 | 0.446 | 1 | 1.4 |

|           |          |              |       |       |   |     |
|-----------|----------|--------------|-------|-------|---|-----|
| HIF1A     | 0.160742 | -0.202925409 | 0.396 | 0.39  | 1 | 1.4 |
| TIMM9     | 0.161061 | -0.14885639  | 0.22  | 0.221 | 1 | 1.4 |
| UBE2D3    | 0.164417 | -0.107920368 | 0.585 | 0.554 | 1 | 1.4 |
| WDR33     | 0.167447 | -0.135887537 | 0.314 | 0.312 | 1 | 1.4 |
| MPZL3     | 0.170345 | -0.125422185 | 0.308 | 0.307 | 1 | 1.4 |
| BCLAF1    | 0.170823 | -0.104635829 | 0.385 | 0.379 | 1 | 1.4 |
| RNF19A    | 0.171408 | -0.115045167 | 0.676 | 0.607 | 1 | 1.4 |
| UAP1      | 0.173108 | -0.101040457 | 0.26  | 0.235 | 1 | 1.4 |
| LYST      | 0.174898 | -0.132639509 | 0.181 | 0.162 | 1 | 1.4 |
| RPS26     | 0.175287 | -0.111049721 | 0.164 | 0.17  | 1 | 1.4 |
| AC159540. | 0.179723 | -0.114476246 | 0.169 | 0.177 | 1 | 1.4 |
| ACTR2     | 0.182676 | -0.130352746 | 0.213 | 0.217 | 1 | 1.4 |
| CDK7      | 0.185612 | -0.100621764 | 0.112 | 0.12  | 1 | 1.4 |
| ARIH2     | 0.186969 | -0.10389648  | 0.122 | 0.129 | 1 | 1.4 |
| SCGB2A1   | 0.187562 | -0.179516507 | 0.04  | 0.046 | 1 | 1.4 |
| PPFIA1    | 0.188587 | -0.157398396 | 0.271 | 0.272 | 1 | 1.4 |
| SERBP1    | 0.193173 | -0.13350287  | 0.165 | 0.171 | 1 | 1.4 |
| BCL2L14   | 0.197512 | -0.113063461 | 0.143 | 0.149 | 1 | 1.4 |
| TNRC6A    | 0.20634  | -0.133524657 | 0.251 | 0.252 | 1 | 1.4 |
| SSB       | 0.210779 | -0.117356818 | 0.171 | 0.176 | 1 | 1.4 |
| UBTD2     | 0.212915 | -0.120447304 | 0.129 | 0.135 | 1 | 1.4 |
| LSM3      | 0.219522 | -0.130353051 | 0.324 | 0.32  | 1 | 1.4 |
| TIMM10    | 0.220455 | -0.100464472 | 0.25  | 0.253 | 1 | 1.4 |
| NOP10     | 0.220655 | -0.109051659 | 0.49  | 0.464 | 1 | 1.4 |
| DHX9      | 0.221821 | -0.13057432  | 0.188 | 0.192 | 1 | 1.4 |
| RNF128    | 0.225958 | -0.107020073 | 0.093 | 0.099 | 1 | 1.4 |
| ZMAT2     | 0.232192 | -0.121180135 | 0.224 | 0.226 | 1 | 1.4 |
| BCAS2     | 0.233149 | -0.118384449 | 0.233 | 0.236 | 1 | 1.4 |
| EIF3A     | 0.235739 | -0.127005685 | 0.351 | 0.342 | 1 | 1.4 |
| NCOA3     | 0.239864 | -0.154377403 | 0.291 | 0.289 | 1 | 1.4 |
| MTMR3     | 0.241072 | -0.128773003 | 0.162 | 0.168 | 1 | 1.4 |
| CLDN4     | 0.247792 | -0.25267577  | 0.213 | 0.218 | 1 | 1.4 |
| PRPF40A   | 0.248352 | -0.105458696 | 0.171 | 0.176 | 1 | 1.4 |
| HNRNPH2   | 0.254502 | -0.123883109 | 0.224 | 0.226 | 1 | 1.4 |
| LMBRD1    | 0.256104 | -0.101283527 | 0.236 | 0.239 | 1 | 1.4 |
| BARX2     | 0.258163 | -0.108447793 | 0.383 | 0.383 | 1 | 1.4 |
| DAPP1     | 0.258163 | -0.111289322 | 0.449 | 0.4   | 1 | 1.4 |
| SERP1     | 0.258635 | -0.130902469 | 0.277 | 0.273 | 1 | 1.4 |
| RAP1B     | 0.260285 | -0.158737236 | 0.425 | 0.409 | 1 | 1.4 |
| GNA12     | 0.260498 | -0.171012248 | 0.37  | 0.354 | 1 | 1.4 |
| ASXL1     | 0.262146 | -0.137000941 | 0.266 | 0.265 | 1 | 1.4 |
| ATP5E     | 0.267525 | -0.123436719 | 0.474 | 0.454 | 1 | 1.4 |
| RIC3      | 0.273231 | -0.219408003 | 0.086 | 0.091 | 1 | 1.4 |
| RDX       | 0.274968 | -0.131372791 | 0.216 | 0.216 | 1 | 1.4 |
| ABL2      | 0.277646 | -0.105212801 | 0.201 | 0.205 | 1 | 1.4 |
| KCTD3     | 0.280481 | -0.165792605 | 0.201 | 0.2   | 1 | 1.4 |
| MYO1D     | 0.2861   | -0.145883703 | 0.266 | 0.267 | 1 | 1.4 |

|           |          |              |       |       |   |     |
|-----------|----------|--------------|-------|-------|---|-----|
| GHITM     | 0.287035 | -0.106012391 | 0.499 | 0.475 | 1 | 1.4 |
| ST6GALNAI | 0.297721 | -0.173166781 | 0.393 | 0.386 | 1 | 1.4 |
| CNOT1     | 0.298094 | -0.113005351 | 0.183 | 0.187 | 1 | 1.4 |
| CDK6      | 0.299453 | -0.149278899 | 0.228 | 0.23  | 1 | 1.4 |
| FRMD5     | 0.310519 | -0.131652007 | 0.168 | 0.17  | 1 | 1.4 |
| PITPNC1   | 0.312042 | -0.128800677 | 0.212 | 0.215 | 1 | 1.4 |
| UQCRC2    | 0.317993 | -0.116756813 | 0.463 | 0.443 | 1 | 1.4 |
| TBC1D23   | 0.327537 | -0.120003723 | 0.155 | 0.158 | 1 | 1.4 |
| SH3PXD2A  | 0.338917 | -0.133285778 | 0.145 | 0.149 | 1 | 1.4 |
| AZGP1     | 0.339302 | -0.120178947 | 0.346 | 0.339 | 1 | 1.4 |
| PPP6R3    | 0.340125 | -0.139501917 | 0.447 | 0.424 | 1 | 1.4 |
| ERC1      | 0.344632 | -0.120381998 | 0.299 | 0.295 | 1 | 1.4 |
| AP000487. | 0.344969 | -0.132184206 | 0.202 | 0.205 | 1 | 1.4 |
| ALDOA     | 0.358764 | -0.286553537 | 0.118 | 0.122 | 1 | 1.4 |
| ZC3H7A    | 0.366438 | -0.159614377 | 0.191 | 0.193 | 1 | 1.4 |
| RAB3GAP1  | 0.370844 | -0.100670845 | 0.301 | 0.297 | 1 | 1.4 |
| EIF1B     | 0.374136 | -0.1151247   | 0.285 | 0.28  | 1 | 1.4 |
| EDF1      | 0.374997 | -0.132366055 | 0.074 | 0.079 | 1 | 1.4 |
| NEK7      | 0.393114 | -0.110371352 | 0.201 | 0.202 | 1 | 1.4 |
| VDAC3     | 0.410948 | -0.111148714 | 0.354 | 0.343 | 1 | 1.4 |
| ARHGDIB   | 0.412764 | -0.110147823 | 0.177 | 0.18  | 1 | 1.4 |
| S100A11   | 0.429251 | -0.211490206 | 0.777 | 0.68  | 1 | 1.4 |
| TJP1      | 0.442023 | -0.144252999 | 0.401 | 0.386 | 1 | 1.4 |
| RPS3      | 0.460258 | -0.145634971 | 0.937 | 0.923 | 1 | 1.4 |
| CHP1      | 0.473546 | -0.102586738 | 0.399 | 0.382 | 1 | 1.4 |
| FBXO28    | 0.47593  | -0.113757145 | 0.202 | 0.202 | 1 | 1.4 |
| TJP2      | 0.494721 | -0.123414837 | 0.45  | 0.404 | 1 | 1.4 |
| EIF3D     | 0.495557 | -0.107893232 | 0.425 | 0.405 | 1 | 1.4 |
| MOK       | 0.497206 | -0.12979513  | 0.036 | 0.039 | 1 | 1.4 |
| EIF1      | 0.499119 | -0.159914954 | 0.44  | 0.424 | 1 | 1.4 |
| PI3       | 0.499573 | -0.684558042 | 0.304 | 0.293 | 1 | 1.4 |
| UBL5      | 0.539982 | -0.115838143 | 0.393 | 0.373 | 1 | 1.4 |
| ABRACL    | 0.541358 | -0.125217253 | 0.401 | 0.38  | 1 | 1.4 |
| KRT8      | 0.556265 | -0.138311049 | 0.21  | 0.197 | 1 | 1.4 |
| ITGB6     | 0.557371 | -0.140492538 | 0.335 | 0.308 | 1 | 1.4 |
| CTA-293F1 | 0.558615 | -0.119220399 | 0.125 | 0.126 | 1 | 1.4 |
| EIF2S2    | 0.559094 | -0.115239151 | 0.28  | 0.272 | 1 | 1.4 |
| HECTD1    | 0.582216 | -0.161935563 | 0.27  | 0.262 | 1 | 1.4 |
| NCALD     | 0.589636 | -0.226439651 | 0.223 | 0.215 | 1 | 1.4 |
| SEC63     | 0.599419 | -0.100637744 | 0.255 | 0.25  | 1 | 1.4 |
| BACH1     | 0.603818 | -0.137399885 | 0.317 | 0.303 | 1 | 1.4 |
| CTD-3088G | 0.620562 | -0.112435255 | 0.053 | 0.055 | 1 | 1.4 |
| APEX1     | 0.641461 | -0.106575285 | 0.275 | 0.254 | 1 | 1.4 |
| FRYL      | 0.643267 | -0.10620237  | 0.28  | 0.271 | 1 | 1.4 |
| RAB6A     | 0.651673 | -0.10719306  | 0.301 | 0.29  | 1 | 1.4 |
| FMNL2     | 0.655489 | -0.118157487 | 0.469 | 0.432 | 1 | 1.4 |
| TET2      | 0.674496 | -0.102347919 | 0.215 | 0.21  | 1 | 1.4 |

|         |          |              |       |       |   |     |
|---------|----------|--------------|-------|-------|---|-----|
| HSPA8   | 0.694134 | -0.164520777 | 0.591 | 0.54  | 1 | 1.4 |
| RAP1A   | 0.702423 | -0.104536099 | 0.215 | 0.21  | 1 | 1.4 |
| ARID4B  | 0.721281 | -0.113386745 | 0.533 | 0.493 | 1 | 1.4 |
| TMEM41A | 0.724366 | -0.104690579 | 0.215 | 0.21  | 1 | 1.4 |
| UBR5    | 0.745116 | -0.103302211 | 0.43  | 0.401 | 1 | 1.4 |
| EIF2B5  | 0.75869  | -0.103285785 | 0.602 | 0.554 | 1 | 1.4 |
| LAPTM4A | 0.781781 | -0.109024339 | 0.244 | 0.236 | 1 | 1.4 |
| GREB1L  | 0.815471 | -0.100287922 | 0.14  | 0.135 | 1 | 1.4 |
| EPB41L2 | 0.816667 | -0.173038258 | 0.196 | 0.191 | 1 | 1.4 |
| KMT2E   | 0.817686 | -0.102403588 | 0.427 | 0.394 | 1 | 1.4 |
| PPIB    | 0.82393  | -0.100100945 | 0.119 | 0.118 | 1 | 1.4 |
| BDP1    | 0.828718 | -0.103019414 | 0.217 | 0.206 | 1 | 1.4 |
| PDK3    | 0.859392 | -0.120375109 | 0.291 | 0.278 | 1 | 1.4 |
| GTF2I   | 0.875103 | -0.12636472  | 0.46  | 0.426 | 1 | 1.4 |
| OLA1    | 0.889822 | -0.103318248 | 0.253 | 0.243 | 1 | 1.4 |
| SQSTM1  | 0.891057 | -0.108303164 | 0.289 | 0.278 | 1 | 1.4 |
| GPM6B   | 0.940081 | -0.101508148 | 0.211 | 0.204 | 1 | 1.4 |
| PAN3    | 0.942292 | -0.106209232 | 0.61  | 0.562 | 1 | 1.4 |
| TP53BP2 | 0.959806 | -0.107598932 | 0.162 | 0.157 | 1 | 1.4 |
| FNDC3A  | 0.969192 | -0.113565865 | 0.343 | 0.324 | 1 | 1.4 |
| LAMB3   | 0.972559 | -0.376321034 | 0.306 | 0.283 | 1 | 1.4 |
| IDI1    | 0.988125 | -0.117261779 | 0.222 | 0.213 | 1 | 1.4 |
| SBF2    | 0.990559 | -0.121160493 | 0.702 | 0.642 | 1 | 1.4 |
| PPIL4   | 0.991425 | -0.106042324 | 0.162 | 0.157 | 1 | 1.4 |
